# Supplementary material for: Ubiquitous Micro-Modular Homologies among Genomes from Viruses to Bacteria to Human Mitochondrial DNA: Platforms for Recombination during Evolution?
Source: MDPI journal article supplement (doi:10.3390/v14050885), 2022-04-24
Supplement: s1 [file s1]

## SARS-CoV-2 &amp; Ad12.apr

|                                        |       |                                                                                                     |     |     |     |     |     |     |     |     |     |
|----------------------------------------|-------|-----------------------------------------------------------------------------------------------------|-----|-----|-----|-----|-----|-----|-----|-----|-----|
|                                        |       | Section 1                                                                                           |     |     |     |     |     |     |     |     |     |
| Ad 12 X73487<br>SARS-CoV-2 NC_045512.2 | (1)   | 1                                                                                                   | 10  | 20  | 30  | 40  | 50  | 60  | 70  | 80  | 97  |
|                                        | (1)   | CCTATCTAATAATATACCTTATACTGGACTAGTGCCAATATTAAAATGAAGTGGGCGTAGTGTAATTTGATTGGGTGGAGGTGTGGCTTTGGCGT     |     |     |     |     |     |     |     |     |     |
|                                        | (1)   | -----                                                                                               |     |     |     |     |     |     |     |     |     |
|                                        |       | Section 2                                                                                           |     |     |     |     |     |     |     |     |     |
| Ad 12 X73487<br>SARS-CoV-2 NC_045512.2 | (98)  | 98                                                                                                  | 110 | 120 | 130 | 140 | 150 | 160 | 170 | 180 | 194 |
|                                        | (98)  | GCTTGTAAGTTTGGGCGGATGAGGAAGTGGGGCGCGGCGTGGGAGCCGGGCGCGCCGGATGTGACGTTTTAGACGCCATTTTACACGGAAATGATGT   |     |     |     |     |     |     |     |     |     |
|                                        | (1)   | -----                                                                                               |     |     |     |     |     |     |     |     |     |
|                                        |       | Section 3                                                                                           |     |     |     |     |     |     |     |     |     |
| Ad 12 X73487<br>SARS-CoV-2 NC_045512.2 | (195) | 195                                                                                                 | 200 | 210 | 220 | 230 | 240 | 250 | 260 | 270 | 291 |
|                                        | (195) | TTTTTGGGCGTTGTTTGTGCAAATTTTGTGTTTTAGGCGCGAAACTGAAATGCGGAAGTGAAAATTGATGACGGCAATTTTATTATAGGCGCGGAA    |     |     |     |     |     |     |     |     |     |
|                                        | (1)   | -----                                                                                               |     |     |     |     |     |     |     |     |     |
|                                        |       | Section 4                                                                                           |     |     |     |     |     |     |     |     |     |
| Ad 12 X73487<br>SARS-CoV-2 NC_045512.2 | (292) | 292                                                                                                 | 300 | 310 | 320 | 330 | 340 | 350 | 360 | 370 | 388 |
|                                        | (292) | TATTTACCGAGGGCAGAGTGAACCTCTGAGCCTCTACGTGTGGGTTTCGATACGTGAGCGACGGGGAACTCCACGTTGGCGCTCAAAGGGCGCGTTT   |     |     |     |     |     |     |     |     |     |
|                                        | (1)   | -----                                                                                               |     |     |     |     |     |     |     |     |     |
|                                        |       | Section 5                                                                                           |     |     |     |     |     |     |     |     |     |
| Ad 12 X73487<br>SARS-CoV-2 NC_045512.2 | (389) | 389                                                                                                 | 400 | 410 | 420 | 430 | 440 | 450 | 460 | 470 | 485 |
|                                        | (389) | ATTGTTCTGTCAGCTGATCGTTTGGGTATTTAATGCCGCCGTGTTTCGTCAAGAGGCCACTCTTGAGTGCCAGCGAGAAGAGTTTTCTCTGCCAGCTC  |     |     |     |     |     |     |     |     |     |
|                                        | (1)   | -----                                                                                               |     |     |     |     |     |     |     |     |     |
|                                        |       | Section 6                                                                                           |     |     |     |     |     |     |     |     |     |
| Ad 12 X73487<br>SARS-CoV-2 NC_045512.2 | (486) | 486                                                                                                 | 500 | 510 | 520 | 530 | 540 | 550 | 560 | 570 | 582 |
|                                        | (486) | ATTTTCACGGCGCCATTATGAGAACTGAAATGACTCCCTTGGTCCTGTCGTATCAGGAAGCTGACGACATATTGGAGCATTGTTGGTGGACAACTTTTT |     |     |     |     |     |     |     |     |     |
|                                        | (1)   | -----                                                                                               |     |     |     |     |     |     |     |     |     |
|                                        |       | Section 7                                                                                           |     |     |     |     |     |     |     |     |     |
| Ad 12 X73487<br>SARS-CoV-2 NC_045512.2 | (583) | 583                                                                                                 | 590 | 600 | 610 | 620 | 630 | 640 | 650 | 660 | 679 |
|                                        | (583) | TAACGAGGTACCCAGTGATGATGATCTTTATGTTCCGTCTCTTTACGAACTGTATGATCTTGATGTGGAGTCTGCCGGTGAAGATAATAATGAACAG   |     |     |     |     |     |     |     |     |     |
|                                        | (1)   | -----                                                                                               |     |     |     |     |     |     |     |     |     |

## SARS-CoV-2 &amp; Ad12.apr

|                                        |        |                                                                                                     |      |      |      |      |      |      |      |      |      |
|----------------------------------------|--------|-----------------------------------------------------------------------------------------------------|------|------|------|------|------|------|------|------|------|
|                                        |        | Section 8                                                                                           |      |      |      |      |      |      |      |      |      |
| Ad 12 X73487<br>SARS-CoV-2 NC_045512.2 | (680)  | 680                                                                                                 | 690  | 700  | 710  | 720  | 730  | 740  | 750  | 760  | 776  |
|                                        | (680)  | GCGGTGAATGAGTTTTTTTCCCGAATCGCTTATTTTAGCTGCCAGTGAGGGGTTGTTTTTACCGGAGCCTCCTGTACTTTCTCCTGTCTGTGAGCCTA  |      |      |      |      |      |      |      |      |      |
|                                        | (1)    | -----                                                                                               |      |      |      |      |      |      |      |      |      |
|                                        |        | Section 9                                                                                           |      |      |      |      |      |      |      |      |      |
| Ad 12 X73487<br>SARS-CoV-2 NC_045512.2 | (777)  | 777                                                                                                 | 790  | 800  | 810  | 820  | 830  | 840  | 850  | 860  | 873  |
|                                        | (777)  | TTGGGGGCGAATGTATGCCACAACCTGCACCCTGAAGATATGGATTTATTGTGCTACGAGATGGGCTTTCCCTGTAGCGATTTCGGAAGACGAGCAAGA |      |      |      |      |      |      |      |      |      |
|                                        | (1)    | -----                                                                                               |      |      |      |      |      |      |      |      |      |
|                                        |        | Section 10                                                                                          |      |      |      |      |      |      |      |      |      |
| Ad 12 X73487<br>SARS-CoV-2 NC_045512.2 | (874)  | 874                                                                                                 | 880  | 890  | 900  | 910  | 920  | 930  | 940  | 950  | 970  |
|                                        | (874)  | CGAGAACGGAATGGCGCATGTTTCTGCATCCGCAGCTGCTGCTGCCGCTGATAGGGAACGTGAGGAGTTTCAGTTAGACCATCCAGAGTTGCCCGGA   |      |      |      |      |      |      |      |      |      |
|                                        | (1)    | -----                                                                                               |      |      |      |      |      |      |      |      |      |
|                                        |        | Section 11                                                                                          |      |      |      |      |      |      |      |      |      |
| Ad 12 X73487<br>SARS-CoV-2 NC_045512.2 | (971)  | 971                                                                                                 | 980  | 990  | 1000 | 1010 | 1020 | 1030 | 1040 | 1050 | 1067 |
|                                        | (971)  | CACAATTGTAAGTCCTGTGAGCACCACCGGAATAGTACTGGAAATACTGACTTAATGTGCTCTTTGTGCTATCTGCGAGCCTACAACATGTTTCATTT  |      |      |      |      |      |      |      |      |      |
|                                        | (1)    | -----                                                                                               |      |      |      |      |      |      |      |      |      |
|                                        |        | Section 12                                                                                          |      |      |      |      |      |      |      |      |      |
| Ad 12 X73487<br>SARS-CoV-2 NC_045512.2 | (1068) | 1068                                                                                                | 1080 | 1090 | 1100 | 1110 | 1120 | 1130 | 1140 | 1150 | 1164 |
|                                        | (1068) | ACAGTAAGTGTGCTATGGGAGGTGGGAGGTGATTTTTTTTTCTTAAGCAGTGAAAAATAATATTTTGTGTTTTTAGGTCCTGTTTCCGATAATGAG    |      |      |      |      |      |      |      |      |      |
|                                        | (1)    | -----                                                                                               |      |      |      |      |      |      |      |      |      |
|                                        |        | Section 13                                                                                          |      |      |      |      |      |      |      |      |      |
| Ad 12 X73487<br>SARS-CoV-2 NC_045512.2 | (1165) | 1165                                                                                                | 1170 | 1180 | 1190 | 1200 | 1210 | 1220 | 1230 | 1240 | 1261 |
|                                        | (1165) | CCTGAACCTAATAGCACTTTGGATGGCGATGAGCGACCCTCACCCCGAAACTAGGAAGTGCGGTTCCAGAAGGAGTAATAAAACCTGTGCCTCAGC    |      |      |      |      |      |      |      |      |      |
|                                        | (1)    | -----                                                                                               |      |      |      |      |      |      |      |      |      |
|                                        |        | Section 14                                                                                          |      |      |      |      |      |      |      |      |      |
| Ad 12 X73487<br>SARS-CoV-2 NC_045512.2 | (1262) | 1262                                                                                                | 1270 | 1280 | 1290 | 1300 | 1310 | 1320 | 1330 | 1340 | 1358 |
|                                        | (1262) | GGGTGACTGGGAGGCGTAGATGTGCTGTGGAAAGCATTTTGGATTTGATTCAAGAGGAAGAAAGAGAAACAAACAGTGCCCTGTTGATCTGTCAAGTAA |      |      |      |      |      |      |      |      |      |
|                                        | (1)    | -----                                                                                               |      |      |      |      |      |      |      |      |      |

## SARS-CoV-2 &amp; Ad12.apr

|                                        |               |                                                                                                             |      |      |      |      |      |      |      |      |      |
|----------------------------------------|---------------|-------------------------------------------------------------------------------------------------------------|------|------|------|------|------|------|------|------|------|
|                                        |               | Section 15                                                                                                  |      |      |      |      |      |      |      |      |      |
| Ad 12 X73487<br>SARS-CoV-2 NC_045512.2 | (1359)        | 1359                                                                                                        | 1370 | 1380 | 1390 | 1400 | 1410 | 1420 | 1430 | 1440 | 1455 |
|                                        | (1359)<br>(1) | ACGCCCTAGATGTAATTAATGGACTTTGAGCACCTGGGCAATAAAATAGGGGTAATGTGGTTTTTGTGAGTCATGTATAATAAACTGGTTTCGGTT<br>-----   |      |      |      |      |      |      |      |      |      |
|                                        |               | Section 16                                                                                                  |      |      |      |      |      |      |      |      |      |
| Ad 12 X73487<br>SARS-CoV-2 NC_045512.2 | (1456)        | 1456                                                                                                        | 1470 | 1480 | 1490 | 1500 | 1510 | 1520 | 1530 | 1540 | 1552 |
|                                        | (1456)<br>(1) | GAAGTGTCTTGTTAATGTTTGGTGGGCGTGGTTAAACAGGGATATAAAGCTGGGTTGGTGTGCTTTGAATAGTTTCATCTTAGTAATGGAGTTGGA<br>-----   |      |      |      |      |      |      |      |      |      |
|                                        |               | Section 17                                                                                                  |      |      |      |      |      |      |      |      |      |
| Ad 12 X73487<br>SARS-CoV-2 NC_045512.2 | (1553)        | 1553                                                                                                        | 1560 | 1570 | 1580 | 1590 | 1600 | 1610 | 1620 | 1630 | 1649 |
|                                        | (1553)<br>(1) | AACTGTGCTGCAAAGTTTTTCAGAGCGTTCGCCAGCTCTTGCAGTATACCTCTAAAAACACTTCAGGTTTTTGGAGGTATCTGTTTGGCTCTACCTTA<br>----- |      |      |      |      |      |      |      |      |      |
|                                        |               | Section 18                                                                                                  |      |      |      |      |      |      |      |      |      |
| Ad 12 X73487<br>SARS-CoV-2 NC_045512.2 | (1650)        | 1650                                                                                                        | 1660 | 1670 | 1680 | 1690 | 1700 | 1710 | 1720 | 1730 | 1746 |
|                                        | (1650)<br>(1) | AGCAAGGTGGTAAATAGGGTGAAAGAAGACTATAGAGAGGAATTTGAAAACATATTGGCCGACTGTCCAGGGCTTTTGGCTTCACTAGACCTTTGTT<br>-----  |      |      |      |      |      |      |      |      |      |
|                                        |               | Section 19                                                                                                  |      |      |      |      |      |      |      |      |      |
| Ad 12 X73487<br>SARS-CoV-2 NC_045512.2 | (1747)        | 1747                                                                                                        | 1760 | 1770 | 1780 | 1790 | 1800 | 1810 | 1820 | 1830 | 1843 |
|                                        | (1747)<br>(1) | ACCACTTGGTGTTCAGGAAAAAGTGGTCAGATCCTTAGATTTTTTCATCTGTGGGACGAACGGTTGCTTCTATTGCTTTTTTGGCAACCATATTGGA<br>-----  |      |      |      |      |      |      |      |      |      |
|                                        |               | Section 20                                                                                                  |      |      |      |      |      |      |      |      |      |
| Ad 12 X73487<br>SARS-CoV-2 NC_045512.2 | (1844)        | 1844                                                                                                        | 1850 | 1860 | 1870 | 1880 | 1890 | 1900 | 1910 | 1920 | 1940 |
|                                        | (1844)<br>(1) | TAAATGGAGCGAGAAATCCCACCTGAGTTGGGATTACATGCTGGATTACATGTCAATGCAGCTGTGGAGGGCATGGCTGAAGAGGAGGGTTTGCATT<br>-----  |      |      |      |      |      |      |      |      |      |
|                                        |               | Section 21                                                                                                  |      |      |      |      |      |      |      |      |      |
| Ad 12 X73487<br>SARS-CoV-2 NC_045512.2 | (1941)        | 1941                                                                                                        | 1950 | 1960 | 1970 | 1980 | 1990 | 2000 | 2010 | 2020 | 2037 |
|                                        | (1941)<br>(1) | TACTCGCTGGCGCGGCCCTTTGACCATGCCGCCGCTGCCGACGTTGCAAGAGGAGAAGGAGGAGGAGCGGAACCTGCGGTGGTGGAGAAGTAAACAT<br>-----  |      |      |      |      |      |      |      |      |      |

## SARS-CoV-2 &amp; Ad12.apr

|                                        |        |                                                                                                    |      |      |      |      |      |      |      |      |            |      |
|----------------------------------------|--------|----------------------------------------------------------------------------------------------------|------|------|------|------|------|------|------|------|------------|------|
|                                        |        |                                                                                                    |      |      |      |      |      |      |      |      | Section 22 |      |
| Ad 12 X73487<br>SARS-CoV-2 NC_045512.2 | (2038) | 2038                                                                                               | 2050 | 2060 | 2070 | 2080 | 2090 | 2100 | 2110 | 2120 | 2134       |      |
|                                        | (2038) | GGAACAACAGGTGCAAGAAGGCCATGTACTTGACTCTGGCGAAGGGCCTAGTTGCGCAGATGATAGAGATAAGCAGGAAAAAAAAAGAAAGTTTAAAG |      |      |      |      |      |      |      |      |            |      |
|                                        | (1)    | -----                                                                                              |      |      |      |      |      |      |      |      |            |      |
|                                        |        |                                                                                                    |      |      |      |      |      |      |      |      | Section 23 |      |
| Ad 12 X73487<br>SARS-CoV-2 NC_045512.2 | (2135) | 2135                                                                                               | 2140 | 2150 | 2160 | 2170 | 2180 | 2190 | 2200 | 2210 | 2220       | 2231 |
|                                        | (2135) | GAAGCTGCTGTTCTTAGTAGGCTAACTGTTAATCTGATGTCCCGCCCGCGTTTGGAAGCTGTATATTGGCAGGAGTTGCAGGATGAATTTTCAGCGGG |      |      |      |      |      |      |      |      |            |      |
|                                        | (1)    | -----                                                                                              |      |      |      |      |      |      |      |      |            |      |
|                                        |        |                                                                                                    |      |      |      |      |      |      |      |      | Section 24 |      |
| Ad 12 X73487<br>SARS-CoV-2 NC_045512.2 | (2232) | 2232                                                                                               | 2240 | 2250 | 2260 | 2270 | 2280 | 2290 | 2300 | 2310 | 2328       |      |
|                                        | (2232) | GTGATATGCATTTACAGTACAAATACAGTTTTGAACAATTAAAAACCCACTGGTTAGAGCCATGGGAGGATATGGAGTGTGCTATTAAAGCTTTTGC  |      |      |      |      |      |      |      |      |            |      |
|                                        | (1)    | -----                                                                                              |      |      |      |      |      |      |      |      |            |      |
|                                        |        |                                                                                                    |      |      |      |      |      |      |      |      | Section 25 |      |
| Ad 12 X73487<br>SARS-CoV-2 NC_045512.2 | (2329) | 2329                                                                                               | 2340 | 2350 | 2360 | 2370 | 2380 | 2390 | 2400 | 2410 | 2425       |      |
|                                        | (2329) | TAAATTGGCCTTACGTCCTGATTGTAGCTACAGAATTACTAAAACAGTAACCATTACTTCATGCGCCTATATTATAGGTAACGGGGCAATAGTTGAG  |      |      |      |      |      |      |      |      |            |      |
|                                        | (1)    | -----                                                                                              |      |      |      |      |      |      |      |      |            |      |
|                                        |        |                                                                                                    |      |      |      |      |      |      |      |      | Section 26 |      |
| Ad 12 X73487<br>SARS-CoV-2 NC_045512.2 | (2426) | 2426                                                                                               | 2440 | 2450 | 2460 | 2470 | 2480 | 2490 | 2500 | 2510 | 2522       |      |
|                                        | (2426) | GTAGATACAAGCGACAGAGTTGCTTTTAGATGTGCAATGCAGGGTATGGGCCAGGGGTGGTGGGTTTGGATGGAATTACATTTATAAATGTTAGGT   |      |      |      |      |      |      |      |      |            |      |
|                                        | (1)    | -----                                                                                              |      |      |      |      |      |      |      |      |            |      |
|                                        |        |                                                                                                    |      |      |      |      |      |      |      |      | Section 27 |      |
| Ad 12 X73487<br>SARS-CoV-2 NC_045512.2 | (2523) | 2523                                                                                               | 2530 | 2540 | 2550 | 2560 | 2570 | 2580 | 2590 | 2600 | 2619       |      |
|                                        | (2523) | TTGCTGGAGATAAGTTTAAAGGCATTATGTTGCAAGCTAATACCTGTCTTGTCTTGCATGGTGTCTTACTTTCTTAACTTTAGTAACATTTGTGTAGA |      |      |      |      |      |      |      |      |            |      |
|                                        | (1)    | -----                                                                                              |      |      |      |      |      |      |      |      |            |      |
|                                        |        |                                                                                                    |      |      |      |      |      |      |      |      | Section 28 |      |
| Ad 12 X73487<br>SARS-CoV-2 NC_045512.2 | (2620) | 2620                                                                                               | 2630 | 2640 | 2650 | 2660 | 2670 | 2680 | 2690 | 2700 | 2716       |      |
|                                        | (2620) | GTCTTGGAATAAGGTTTCTGCTAGGGGCTGTACTTTTTATGGATGTTGGAAGGGTTTGGTGGGTAGACCAAAAAGTAACTGTCTGTAAAAAAGTGT   |      |      |      |      |      |      |      |      |            |      |
|                                        | (1)    | -----                                                                                              |      |      |      |      |      |      |      |      |            |      |

## SARS-CoV-2 &amp; Ad12.apr

|                                        |        |                                                                                                     |      |      |      |      |      |      |      |      |            |
|----------------------------------------|--------|-----------------------------------------------------------------------------------------------------|------|------|------|------|------|------|------|------|------------|
|                                        |        |                                                                                                     |      |      |      |      |      |      |      |      | Section 29 |
| Ad 12 X73487<br>SARS-CoV-2 NC_045512.2 | (2717) | 2717                                                                                                | 2730 | 2740 | 2750 | 2760 | 2770 | 2780 | 2790 | 2800 | 2813       |
|                                        | (2717) | TTGTTTGAAAAATGTGTACTTGCTTTAATTGTAGAGGGGGATGCACATATTAGGCATAATGCAGCTTCAGAAAATGCCTGTTTTGTATTATTGAAGG   |      |      |      |      |      |      |      |      |            |
|                                        | (1)    | -----                                                                                               |      |      |      |      |      |      |      |      |            |
|                                        |        |                                                                                                     |      |      |      |      |      |      |      |      | Section 30 |
| Ad 12 X73487<br>SARS-CoV-2 NC_045512.2 | (2814) | 2814                                                                                                | 2820 | 2830 | 2840 | 2850 | 2860 | 2870 | 2880 | 2890 | 2900 2910  |
|                                        | (2814) | GAATGGCTATTTTAAAGCATAATATGGTTTGTGGGGTGTCTGATCAAACATATGCGACGTTTTGTTACCTGTGCTGATGGAAATTGTCATACCTTAA   |      |      |      |      |      |      |      |      |            |
|                                        | (1)    | -----                                                                                               |      |      |      |      |      |      |      |      |            |
|                                        |        |                                                                                                     |      |      |      |      |      |      |      |      | Section 31 |
| Ad 12 X73487<br>SARS-CoV-2 NC_045512.2 | (2911) | 2911                                                                                                | 2920 | 2930 | 2940 | 2950 | 2960 | 2970 | 2980 | 2990 | 3007       |
|                                        | (2911) | AACTGTTTCATATTGTGAGCCACAGTAGACATTGTTGGCCTGTATGTGATCATAACATGTTTATGCGCTGTACCATACATTTAGGCTTAAGGCGGGGT  |      |      |      |      |      |      |      |      |            |
|                                        | (1)    | -----                                                                                               |      |      |      |      |      |      |      |      |            |
|                                        |        |                                                                                                     |      |      |      |      |      |      |      |      | Section 32 |
| Ad 12 X73487<br>SARS-CoV-2 NC_045512.2 | (3008) | 3008                                                                                                | 3020 | 3030 | 3040 | 3050 | 3060 | 3070 | 3080 | 3090 | 3104       |
|                                        | (3008) | ATGTTTAGACCTTCCCAATGTAACCTTCAGCCACTCAAACATTATGCTGGAACCTGAAGTGTTTTCTAGAGTGTGTTTAAATGGGGTATTTGATTTAT  |      |      |      |      |      |      |      |      |            |
|                                        | (1)    | -----                                                                                               |      |      |      |      |      |      |      |      |            |
|                                        |        |                                                                                                     |      |      |      |      |      |      |      |      | Section 33 |
| Ad 12 X73487<br>SARS-CoV-2 NC_045512.2 | (3105) | 3105                                                                                                | 3110 | 3120 | 3130 | 3140 | 3150 | 3160 | 3170 | 3180 | 3190 3201  |
|                                        | (3105) | CTGTGGAATTATGTAAGGTTATAAGATATAATGATGATACTCGACATCGTTGCCGACAGTGTGAGTGTGGTAGCAGTCATCTAGAACTTCGTCCCAT   |      |      |      |      |      |      |      |      |            |
|                                        | (1)    | -----                                                                                               |      |      |      |      |      |      |      |      |            |
|                                        |        |                                                                                                     |      |      |      |      |      |      |      |      | Section 34 |
| Ad 12 X73487<br>SARS-CoV-2 NC_045512.2 | (3202) | 3202                                                                                                | 3210 | 3220 | 3230 | 3240 | 3250 | 3260 | 3270 | 3280 | 3298       |
|                                        | (3202) | TGTGCTAAATGTAACCTGAGGAGCTGAGAAGTGACCACCTTACCCTGTCTTGCCTGCGGACTGACTATGAGTCAAGTGATGAAGACGACAACCTGAGGT |      |      |      |      |      |      |      |      |            |
|                                        | (1)    | -----                                                                                               |      |      |      |      |      |      |      |      |            |
|                                        |        |                                                                                                     |      |      |      |      |      |      |      |      | Section 35 |
| Ad 12 X73487<br>SARS-CoV-2 NC_045512.2 | (3299) | 3299                                                                                                | 3310 | 3320 | 3330 | 3340 | 3350 | 3360 | 3370 | 3380 | 3395       |
|                                        | (3299) | AAGTGGGTGGAGCTAGGTGGGATTATAAAAGGCTGGAAGTCAACTAAAAATTGTTTTTGTCTTTTAAACAGCACGATGAACGGAACCTACTCAGAACA  |      |      |      |      |      |      |      |      |            |
|                                        | (1)    | -----                                                                                               |      |      |      |      |      |      |      |      |            |

SARS-CoV-2 & Ad12.apr

|                                        |        |                                                                                                     |      |      |      |      |      |      |      |      |      |      |
|----------------------------------------|--------|-----------------------------------------------------------------------------------------------------|------|------|------|------|------|------|------|------|------|------|
| Section 36                             |        |                                                                                                     |      |      |      |      |      |      |      |      |      |      |
| Ad 12 X73487<br>SARS-CoV-2 NC_045512.2 | (3396) | 3396                                                                                                | 3410 | 3420 | 3430 | 3440 | 3450 | 3460 | 3470 | 3480 | 3492 |      |
|                                        | (3396) | ACGCTGCGCTTTTTGATGGAGGGGTTTTAGCCCTTATTTGACTTCCAGGTTACCATATTGGGCCGGAGTACGTAGAATGTGGTAGGATCTACAGT     |      |      |      |      |      |      |      |      |      |      |
|                                        | (1)    | -----                                                                                               |      |      |      |      |      |      |      |      |      |      |
| Section 37                             |        |                                                                                                     |      |      |      |      |      |      |      |      |      |      |
| Ad 12 X73487<br>SARS-CoV-2 NC_045512.2 | (3493) | 3493                                                                                                | 3500 | 3510 | 3520 | 3530 | 3540 | 3550 | 3560 | 3570 | 3589 |      |
|                                        | (3493) | GGACGGTCGACCTGTGGCACCTGCAAATTCATCAACATTAACTATGCAACTATTGGACCCTCGCCTTTGGATACCGCCGCCGCCGCTGCAGCTTCC    |      |      |      |      |      |      |      |      |      |      |
|                                        | (1)    | -----                                                                                               |      |      |      |      |      |      |      |      |      |      |
| Section 38                             |        |                                                                                                     |      |      |      |      |      |      |      |      |      |      |
| Ad 12 X73487<br>SARS-CoV-2 NC_045512.2 | (3590) | 3590                                                                                                | 3600 | 3610 | 3620 | 3630 | 3640 | 3650 | 3660 | 3670 | 3686 |      |
|                                        | (3590) | GCGGCCGCTTCTACGGCTCGCAGTATGGCAGCTGATTTACAGCTTCTACAATCACTTGGCTTCGAATGCTGTGACACGCACCGCAGTTCGAGAGGACA  |      |      |      |      |      |      |      |      |      |      |
|                                        | (1)    | -----                                                                                               |      |      |      |      |      |      |      |      |      |      |
| Section 39                             |        |                                                                                                     |      |      |      |      |      |      |      |      |      |      |
| Ad 12 X73487<br>SARS-CoV-2 NC_045512.2 | (3687) | 3687                                                                                                | 3700 | 3710 | 3720 | 3730 | 3740 | 3750 | 3760 | 3770 | 3783 |      |
|                                        | (3687) | TTCTGACTGTTATGCTTGCCAAGCTTGAACTCTAACTGCTCAGCTGGAAAGAGCTATCGCAAAAGGTTGAGGAATTAG--CTG-ATGCTACTAGCCCA  |      |      |      |      |      |      |      |      |      |      |
|                                        | (1)    | -----ATTAAAGGTTTATACCTTCCCAGGTAACAAACCAACCAACTTTCGATCTCTTG                                          |      |      |      |      |      |      |      |      |      |      |
| Section 40                             |        |                                                                                                     |      |      |      |      |      |      |      |      |      |      |
| Ad 12 X73487<br>SARS-CoV-2 NC_045512.2 | (3784) | 3784                                                                                                | 3790 | 3800 | 3810 | 3820 | 3830 | 3840 | 3850 | 3860 | 3870 | 3880 |
|                                        | (3781) | TAC-----CCAGCCCAACCTGTAACCCAATAAAGAAAAAACTTAAATTTGATGTTGTT--ATGAATC---TTATTGATACTT-----             |      |      |      |      |      |      |      |      |      |      |
|                                        | (54)   | TAGATCTGTTCTCTAAACGAACCTTAAATCTGTGTGGCTGTCACTCGGCTGCATGCTTAGTGCACTCACGCAGTATAATTATACTAATTACTGT      |      |      |      |      |      |      |      |      |      |      |
| Section 41                             |        |                                                                                                     |      |      |      |      |      |      |      |      |      |      |
| Ad 12 X73487<br>SARS-CoV-2 NC_045512.2 | (3881) | 3881                                                                                                | 3890 | 3900 | 3910 | 3920 | 3930 | 3940 | 3950 | 3960 | 3977 |      |
|                                        | (3856) | GTTTTTCTGACATGGTAAGCTCTTGACCAACCGTTCCCTATCAT--TAAAGAACACGTTGAAAGTGTTCAGTATT--TTGTAAAGATGAGCCTGTAT   |      |      |      |      |      |      |      |      |      |      |
|                                        | (151)  | CGTTGACAGGACACG--AGTAACTCTGTCTATCTTCCTGCAAGGCTGCTTACGGTTTCGTCCGTGT-TGCAGCCGATCATCAGCACATCTAGG---TTT |      |      |      |      |      |      |      |      |      |      |
| Section 42                             |        |                                                                                                     |      |      |      |      |      |      |      |      |      |      |
| Ad 12 X73487<br>SARS-CoV-2 NC_045512.2 | (3978) | 3978                                                                                                | 3990 | 4000 | 4010 | 4020 | 4030 | 4040 | 4050 | 4060 | 4074 |      |
|                                        | (3949) | -ATTAAAGGTACATTGGCATTAGGCCATCTTTTGGGA---TGAAGGTAGGACCAATTGAAGGGCTTCATGTTCCGGGTAGTGT-----TGTAGATAA-  |      |      |      |      |      |      |      |      |      |      |
|                                        | (241)  | CGTCCGGGT--GTGACGAAAGGTAAAGATGGAG-AGCCTGTGCCCTGGTTTCAACG-AGAAAACACACGTCCAACTCAGTTTGCCTGTTTACAGGT    |      |      |      |      |      |      |      |      |      |      |

SARS-CoV-2 & Ad12.apr

|                        |        |      |       |           |             |            |        |           |           |        |          |             |            |           |         |         |               |        |       |        |         |      |        |       |        |         |           |      |        |     |      |      |     |        |      |       |      |      |     |      |   |    |
|------------------------|--------|------|-------|-----------|-------------|------------|--------|-----------|-----------|--------|----------|-------------|------------|-----------|---------|---------|---------------|--------|-------|--------|---------|------|--------|-------|--------|---------|-----------|------|--------|-----|------|------|-----|--------|------|-------|------|------|-----|------|---|----|
| Section 43             |        |      |       |           |             |            |        |           |           |        |          |             |            |           |         |         |               |        |       |        |         |      |        |       |        |         |           |      |        |     |      |      |     |        |      |       |      |      |     |      |   |    |
| Ad 12 X73487           | (4075) | 4075 | 4080  | 4090      | 4100        | 4110       | 4120   | 4130      | 4140      | 4150   | 4160     | 4171        |            |           |         |         |               |        |       |        |         |      |        |       |        |         |           |      |        |     |      |      |     |        |      |       |      |      |     |      |   |    |
| SARS-CoV-2 NC_045512.2 | (4035) | TC   | CAGT  | CATAGCA-- | ACAACGCTGGG | CATGG-TGAT | TTA    | AATATA    | TCTT-T    | TAA    | CAACCAAG | CTAATTG-CTA | ATGGAAG-AC | CTTTAGTAT | TAGGTA  | TT      |               |        |       |        |         |      |        |       |        |         |           |      |        |     |      |      |     |        |      |       |      |      |     |      |   |    |
|                        | (334)  | TC   | GC    | GACGT     | GCTCTCGT    | ACGTG      | GCTTT  | GAGACTCCG | TGG       | AGGAGG | TCTTA    | TCAGAGG     | CACGT-CA   | ACATCTT   | AAAGAT  | GGCACTT | GTTGGCTTAGGTA | GAG    |       |        |         |      |        |       |        |         |           |      |        |     |      |      |     |        |      |       |      |      |     |      |   |    |
| Section 44             |        |      |       |           |             |            |        |           |           |        |          |             |            |           |         |         |               |        |       |        |         |      |        |       |        |         |           |      |        |     |      |      |     |        |      |       |      |      |     |      |   |    |
| Ad 12 X73487           | (4172) | 4172 | 4180  | 4190      | 4200        | 4210       | 4220   | 4230      | 4240      | 4250   |          | 4268        |            |           |         |         |               |        |       |        |         |      |        |       |        |         |           |      |        |     |      |      |     |        |      |       |      |      |     |      |   |    |
| SARS-CoV-2 NC_045512.2 | (4126) | GAT  | A-AAA | CGGT      | TAAAGC      | TGGGTGGGA  | TGCAT  | CCGAGG    | TGACATGAT | AT--GA | AGTTT    | TGATTGT     | ATTTGAG    | ATTG      | GCAA-TG | TTAC    | CTG           | CCCAAT | ATC   |        |         |      |        |       |        |         |           |      |        |     |      |      |     |        |      |       |      |      |     |      |   |    |
|                        | (430)  | AG   | TTG   | AAA       | AGG         | CGCTTT     | TGCC   | TCAAC     | TTGA      | ACAG   | CCCC     | TATGT       | GTTCA      | TAA       | AGCTT   | -----CG | GATGC         | T      | CGA   | ACTG   | CACCTCA | TGGT | CATGTT | ATGG  |        |         |           |      |        |     |      |      |     |        |      |       |      |      |     |      |   |    |
| Section 45             |        |      |       |           |             |            |        |           |           |        |          |             |            |           |         |         |               |        |       |        |         |      |        |       |        |         |           |      |        |     |      |      |     |        |      |       |      |      |     |      |   |    |
| Ad 12 X73487           | (4269) | 4269 | 4280  | 4290      | 4300        | 4310       | 4320   | 4330      | 4340      | 4350   |          | 4365        |            |           |         |         |               |        |       |        |         |      |        |       |        |         |           |      |        |     |      |      |     |        |      |       |      |      |     |      |   |    |
| SARS-CoV-2 NC_045512.2 | (4219) | T    | CTTCT | TGG       | ATT         | CAT        | AT-TGT | GGAG      | AACCA     | C      | GAA      | AAC         | GGT        | GT--AG    | CCAGT   | ACACT   | TGG           | GAA-A  | TT    | TGT    | CAT     | GGA  | GT     | TTAGA | AAGGAA | AGGCATG | GAA       |      |        |     |      |      |     |        |      |       |      |      |     |      |   |    |
|                        | (522)  | T    | TGAGC | TGG       | TAG         | CAG        | AAC    | T-C       | GAAG      | GCATT  | C        | AGT         | ACG        | GTC       | GT      | AGT     | G             | TGAG   | ACACT | TGG    | TGTCC   | TT   | GTC    | CCT   | CAT    | GT      | -----GGGC | GAA  |        |     |      |      |     |        |      |       |      |      |     |      |   |    |
| Section 46             |        |      |       |           |             |            |        |           |           |        |          |             |            |           |         |         |               |        |       |        |         |      |        |       |        |         |           |      |        |     |      |      |     |        |      |       |      |      |     |      |   |    |
| Ad 12 X73487           | (4366) | 4366 | 4380  | 4390      | 4400        | 4410       | 4420   | 4430      | 4440      | 4450   |          | 4462        |            |           |         |         |               |        |       |        |         |      |        |       |        |         |           |      |        |     |      |      |     |        |      |       |      |      |     |      |   |    |
| SARS-CoV-2 NC_045512.2 | (4312) | AAAC | TTG   | GAAAC     | GC          | CTTT       | GTGA   | CTT       | CCCAAA    | TTT    | TTC      | CAT         | AC         | ACT       | CAT     | CCATT   | A             | TAT    | GG    | CA-A   | TT      | G    | GAC    | C     | GCG    | AG      | CAG       | CGGC | -TT    | GAG | C    | AAAA | AT  | GT     |      |       |      |      |     |      |   |    |
|                        | (605)  | A    | TAC   | CAG       | TG---       | GC         | --TT   | TACCG     | C         | AAG    | TTCT     | T           | TTC        | GTA       | GA      | ACGG    | T             | AATA   | AA    | -----G | GAG     | CT   | GGT    | GG    | C      | CAT     | AG        | TTA  | CGGC   | GCC | GAT  | CTAA | -A  | GT     |      |       |      |      |     |      |   |    |
| Section 47             |        |      |       |           |             |            |        |           |           |        |          |             |            |           |         |         |               |        |       |        |         |      |        |       |        |         |           |      |        |     |      |      |     |        |      |       |      |      |     |      |   |    |
| Ad 12 X73487           | (4463) | 4463 | 4470  | 4480      | 4490        | 4500       | 4510   | 4520      | 4530      | 4540   |          | 4559        |            |           |         |         |               |        |       |        |         |      |        |       |        |         |           |      |        |     |      |      |     |        |      |       |      |      |     |      |   |    |
| SARS-CoV-2 NC_045512.2 | (4407) | TT   | T     | CTG       | GAT         | CAG        | AA-AC  | ATCAT     | -AG       | TTG    | TGG      | TC          | TAG        | AG        | TT      | AGG     | T             | CA     | TC    | GT-A   | GG      | AC   | AACTTA | AC    | AAA    | TTT     | TAG       | G    | ACACA  | G   | C    | GTT  | C   | CAGATT | GTG  | GA    | AT   |      |     |      |   |    |
|                        | (690)  | CAT  | TT    | TG        | ACT         | TAG        | GCG    | AC        | GAGC      | TT     | G        | CAC         | TG         | AT        | C       | TT      | ATGA          | AG     | ATTT  | TC     | AAG     | AAA  | AC     | T     | GGA    | AC      | ACT       | AA   | ACATAG | G   | CAGT | G    | T   | GTT    | AC   | ---CC | GTG  | AACT |     |      |   |    |
| Section 48             |        |      |       |           |             |            |        |           |           |        |          |             |            |           |         |         |               |        |       |        |         |      |        |       |        |         |           |      |        |     |      |      |     |        |      |       |      |      |     |      |   |    |
| Ad 12 X73487           | (4560) | 4560 | 4570  | 4580      | 4590        | 4600       | 4610   | 4620      | 4630      | 4640   |          | 4656        |            |           |         |         |               |        |       |        |         |      |        |       |        |         |           |      |        |     |      |      |     |        |      |       |      |      |     |      |   |    |
| SARS-CoV-2 NC_045512.2 | (4501) | AAT  | AGT   | T         | CCCTC       | TGG        | T      | CCT       | GGG       | CA--T  | AATTT    | CCC         | T          | CACAA     | AT      | TTG     | CA            | TT     | TC    | CA     | ATT     | TC   | CAA    | AG    | ATT    | T       | AA        | T    | T      | C   | AGA  | ---- | TGG | G      | GGA  | ATC   | ---- | ATG  | T   | CCA  |   |    |
|                        | (784)  | CAT  | GCG   | T         | GAGCT       | T          | AAC    | GGA       | GGG       | G      | CA       | TAC         | ACT        | CG        | CTA     | T       | G-TCG         | AT     | AACA  | A      | CTT     | C    | TGT    | G     | CCCC   | T       | GAT       | GG   | C      | T   | ACCC | T    | CT  | TG     | AGT  | G     | CAT  | TAA  | AG  | ACCT | T | CT |
| Section 49             |        |      |       |           |             |            |        |           |           |        |          |             |            |           |         |         |               |        |       |        |         |      |        |       |        |         |           |      |        |     |      |      |     |        |      |       |      |      |     |      |   |    |
| Ad 12 X73487           | (4657) | 4657 | 4670  | 4680      | 4690        | 4700       | 4710   | 4720      | 4730      | 4740   |          | 4753        |            |           |         |         |               |        |       |        |         |      |        |       |        |         |           |      |        |     |      |      |     |        |      |       |      |      |     |      |   |    |
| SARS-CoV-2 NC_045512.2 | (4587) | --   | CTT   | G         | GGA-AC      | AA         | TAAAAA | AAA       | CAG       | TTT    | C--T     | G           | GAGC       | AGGT      | G       | TA      | ACC           | A      | GCT   | GGG    | C       | AGA  | AAG    | CAA   | AT     | TA      | CG        | C    | AA     | C   | AA   | CT   | G   | A      | GA   | CTT   | CCCA | CAG  | CCA | A    |   |    |
|                        | (880)  | AG   | CAC   | GT        | GCT         | GGT        | AA     | AGCTTC    | ATG       | CAC    | TTT      | G           | TCC        | GA        | CA      | ACT     | G             | ACT    | TTA   | TT     | G       | ACA  | CTA    | A     | AG     | GGG     | T         | TA   | TAC    | TG  | CTG  | C    | CGT | GA     | ACAT | GAG   | CAT  | GAA  |     |      |   |    |

SARS-CoV-2 & Ad12.apr

|                        |        |                                                                                                        |      |      |      |      |      |      |      |      |      |      |      |
|------------------------|--------|--------------------------------------------------------------------------------------------------------|------|------|------|------|------|------|------|------|------|------|------|
|                        |        | Section 50                                                                                             |      |      |      |      |      |      |      |      |      |      |      |
|                        |        | (4754)                                                                                                 | 4754 | 4760 | 4770 | 4780 | 4790 | 4800 | 4810 | 4820 | 4830 | 4840 | 4850 |
| Ad 12 X73487           | (4679) | GTTGGTTCCATAAATTACCCTCAATTACAGGTTGCAAGTGATAGTTTA-ACGAGGTGCAGCTGCCGTCTTCGTGGAGAAAGCGGAGGCCACCTTCATTCATC |      |      |      |      |      |      |      |      |      |      |      |
| SARS-CoV-2 NC_045512.2 | (977)  | ATTGCTTGGTACACGGAACTTCTGAAAGAGG--CTATGAATTGCAGACACCTTT---TGAAATTAATTTGGCAAGAAATTTGACACCTTC---A         |      |      |      |      |      |      |      |      |      |      |      |
|                        |        | Section 51                                                                                             |      |      |      |      |      |      |      |      |      |      |      |
|                        |        | (4851)                                                                                                 | 4851 | 4860 | 4870 | 4880 | 4890 | 4900 | 4910 | 4920 | 4930 | 4940 | 4947 |
| Ad 12 X73487           | (4775) | ATTTTGTCTGGACGCGGATGTTTTGCTTGGCCAGTTCCCTTAAACAGACGCTCTCCGCCTAAGGAAGTAACTCTTGTAAAGATTGAAAATTTTAAAGTG    |      |      |      |      |      |      |      |      |      |      |      |
| SARS-CoV-2 NC_045512.2 | (1065) | ATGGG--GAATGTCCAAAATTTGTAT-----TTCCCTTAAATTTCATAATCAAGACTATTCAAAGGTTGAAAAG----AAAAGCTTGAATGG           |      |      |      |      |      |      |      |      |      |      |      |
|                        |        | Section 52                                                                                             |      |      |      |      |      |      |      |      |      |      |      |
|                        |        | (4948)                                                                                                 | 4948 | 4960 | 4970 | 4980 | 4990 | 5000 | 5010 | 5020 | 5030 | 5040 | 5044 |
| Ad 12 X73487           | (4872) | GCTTTTAGGCCATCGGCATAGGCCATGTTGGTCAGGGTTTGTGTT-CAGCAGTTGCAAGCGATCCCATAGCTCAGTTATATTTTCTATGCCATCTCGAT    |      |      |      |      |      |      |      |      |      |      |      |
| SARS-CoV-2 NC_045512.2 | (1150) | CTTTATGGGTAGAATTC-GATCTGTCTATCCAGTTGCGT-CACCAAATGAATGCAACCAATGTGCCTTTCAACT-CTCATGAAGTGTGATCATTTG       |      |      |      |      |      |      |      |      |      |      |      |
|                        |        | Section 53                                                                                             |      |      |      |      |      |      |      |      |      |      |      |
|                        |        | (5045)                                                                                                 | 5045 | 5050 | 5060 | 5070 | 5080 | 5090 | 5100 | 5110 | 5120 | 5130 | 5141 |
| Ad 12 X73487           | (4968) | CCAGCAAACTTTCCTCCTTGCCTGGGTTTGGCTGCTGTTGCTGTAAAG-----GAACGAGGCCTGAGCATCCAAATGGACGAGGGTTTTTGTCTTCC      |      |      |      |      |      |      |      |      |      |      |      |
| SARS-CoV-2 NC_045512.2 | (1244) | GGTG-AAACTTTCATGTCAGACGGG-----GATTTTGTAAAGCCACTTGCGAATTTTGTGTCATGAGAAATTTGACTAAAGAAAGGTGCCACTA         |      |      |      |      |      |      |      |      |      |      |      |
|                        |        | Section 54                                                                                             |      |      |      |      |      |      |      |      |      |      |      |
|                        |        | (5142)                                                                                                 | 5142 | 5150 | 5160 | 5170 | 5180 | 5190 | 5200 | 5210 | 5220 | 5230 | 5238 |
| Ad 12 X73487           | (5060) | AGGGACGTAAATGTGCGCTCAGGGTTGTTTCTGGTCAAGTGAATGGATGCGCTCCCTGGTTGAGCGCTGGCCAGTGTGCGCTTTAACTGAGGCGGCT      |      |      |      |      |      |      |      |      |      |      |      |
| SARS-CoV-2 NC_045512.2 | (1332) | CTTGTTGTTACTTA--CCCAGAAATGCTGTTGTTAAATTTA-----T--T-GTCCAGCATG-----TCACAATTCAAGTAGGACCTGAGCATAGT        |      |      |      |      |      |      |      |      |      |      |      |
|                        |        | Section 55                                                                                             |      |      |      |      |      |      |      |      |      |      |      |
|                        |        | (5239)                                                                                                 | 5239 | 5250 | 5260 | 5270 | 5280 | 5290 | 5300 | 5310 | 5320 | 5330 | 5335 |
| Ad 12 X73487           | (5157) | GGTGCCTGAAAGCGCTGTCTTCTCCCTGTGCTTCTGCAAGGTAGCATTTTAAACATAAGATCATAGACAAAGCCTCTGTAGCG--TGGCCCTTTAGCCC    |      |      |      |      |      |      |      |      |      |      |      |
| SARS-CoV-2 NC_045512.2 | (1415) | CTTGCCGAAATACCAT----AAAGAACTCTGCTTGAAAGCCATTCTTCGTAAAG-GGTGGTCGCACTATT--GCCTTTGGAGGCTGTGTGTCTCTTAT     |      |      |      |      |      |      |      |      |      |      |      |
|                        |        | Section 56                                                                                             |      |      |      |      |      |      |      |      |      |      |      |
|                        |        | (5336)                                                                                                 | 5336 | 5350 | 5360 | 5370 | 5380 | 5390 | 5400 | 5410 | 5420 | 5430 | 5432 |
| Ad 12 X73487           | (5252) | GTATTTTTCTTTTGGAGGTGCTCCGCGAGTCAGGACACT----GAAGGCATTAAAGGGCGTACAGTTTTTGGAGCCAAAAAACAGATTCTGGAGAAAT     |      |      |      |      |      |      |      |      |      |      |      |
| SARS-CoV-2 NC_045512.2 | (1505) | GTTGGTTGCCATAACAAAGTGTGCTATTGTTCCACGTGCTAGCGCTAAACATAGGTTGTAAACATACAGGTGTTGTTGGAGAGGTTCCGAGGTC         |      |      |      |      |      |      |      |      |      |      |      |



## SARS-CoV-2 &amp; Ad12.apr

|                        |        |             |       |        |         |      |      |      |       |       |        |            |          |       |        |         |         |      |        |        |        |      |       |        |      |       |        |      |         |        |        |         |         |        |         |     |       |       |      |        |       |        |   |   |
|------------------------|--------|-------------|-------|--------|---------|------|------|------|-------|-------|--------|------------|----------|-------|--------|---------|---------|------|--------|--------|--------|------|-------|--------|------|-------|--------|------|---------|--------|--------|---------|---------|--------|---------|-----|-------|-------|------|--------|-------|--------|---|---|
|                        |        |             |       |        |         |      |      |      |       |       |        | Section 57 |          |       |        |         |         |      |        |        |        |      |       |        |      |       |        |      |         |        |        |         |         |        |         |     |       |       |      |        |       |        |   |   |
|                        | (5433) | 5433        | 5440  | 5450   | 5460    | 5470 | 5480 | 5490 | 5500  | 5510  | 5529   |            |          |       |        |         |         |      |        |        |        |      |       |        |      |       |        |      |         |        |        |         |         |        |         |     |       |       |      |        |       |        |   |   |
| Ad 12 X73487           | (5345) | AAGCATCTG-- | C-G   | CCACAA | TA      | ACTA | CAAA | CAG  | TTTTC | ACAT  | TCAAC  | TGAC       | CAGGTCAG | CTCAG | GACAT  | TGATGGA | TCAAA   | AAC  | AAGTT  | TCC    | CT     | CCGT | A     |        |      |       |        |      |         |        |        |         |         |        |         |     |       |       |      |        |       |        |   |   |
| SARS-CoV-2 NC_045512.2 | (1602) | TTAATGACAAC | CTT   | CTTG   | AAAT    | ACTC | CAAA | AAG  | --AG  | AAAG  | TCAAC  | --AT       | CAATATT  | GT    | TGGT   | GACT    | TTAA    | ACTT | AATG   | AAGA   | -GAT   | ---  | C     | CCAT   | T    |       |        |      |         |        |        |         |         |        |         |     |       |       |      |        |       |        |   |   |
|                        |        |             |       |        |         |      |      |      |       |       |        | Section 58 |          |       |        |         |         |      |        |        |        |      |       |        |      |       |        |      |         |        |        |         |         |        |         |     |       |       |      |        |       |        |   |   |
|                        | (5530) | 5530        | 5540  | 5550   | 5560    | 5570 | 5580 | 5590 | 5600  | 5610  | 5626   |            |          |       |        |         |         |      |        |        |        |      |       |        |      |       |        |      |         |        |        |         |         |        |         |     |       |       |      |        |       |        |   |   |
| Ad 12 X73487           | (5439) | C           | TTTTT | T      | GATG    | C    | G    | TTTT | CT    | TAC   | ----   | CTT        | GCGAC    | T     | CCATA  | AGG     | GG      | CG   | TCCTT  | T      | CTC    | TGT  | GACAA | -      | AAAG | A     | CTG    | TCAG | -       | TGTC   | TCCG   | T       | AT      | ACAGAT | T       |     |       |       |      |        |       |        |   |   |
| SARS-CoV-2 NC_045512.2 | (1691) | A           | TTTTT | G      | GCAT    | C    | T    | TTTT | TC    | TG    | CTTCCA | CAAG       | TGCTT    | T     | TGTGGA | AA      | CT      | GT   | GAAAGG | T      | ---    | T    | TG    | GATT   | AT   | AAAG  | -      | CAT  | TCA     | AACAA  | A      | T       | TGT     | TGA    | ATCCTGT | T   |       |       |      |        |       |        |   |   |
|                        |        |             |       |        |         |      |      |      |       |       |        | Section 59 |          |       |        |         |         |      |        |        |        |      |       |        |      |       |        |      |         |        |        |         |         |        |         |     |       |       |      |        |       |        |   |   |
|                        | (5627) | 5627        | 5640  | 5650   | 5660    | 5670 | 5680 | 5690 | 5700  | 5710  | 5723   |            |          |       |        |         |         |      |        |        |        |      |       |        |      |       |        |      |         |        |        |         |         |        |         |     |       |       |      |        |       |        |   |   |
| Ad 12 X73487           | (5528) | TAAGGGG     | TCT   | ATCC   | TTC     | -    | AGT  | GGTA | ---   | T     | CCGCGG | TCCCT      | CCT      | CGT   | AC     | AGGA    | TTCTG   | ACC  | ACT    | CTG    | ACACA  | AAAG | CTCT  | AGTCCA | AGCA | AGTA  | CAA    |      |         |        |        |         |         |        |         |     |       |       |      |        |       |        |   |   |
| SARS-CoV-2 NC_045512.2 | (1784) | GGTAATT     | T     | TAA    | AGT     | T    | CA   | AAA  | GG    | AA    | AAGC   | T          | AAAAA    | AGGTG | CCT    | G       | AA      | T    | TTGG   | T      | GAAC   | A    | GA    | AA     | TC   | A     | ATACTG | A    | GT      | CTCT   | TTATGC | A       | TTTGCAT | C      | AG      |     |       |       |      |        |       |        |   |   |
|                        |        |             |       |        |         |      |      |      |       |       |        | Section 60 |          |       |        |         |         |      |        |        |        |      |       |        |      |       |        |      |         |        |        |         |         |        |         |     |       |       |      |        |       |        |   |   |
|                        | (5724) | 5724        | 5730  | 5740   | 5750    | 5760 | 5770 | 5780 | 5790  | 5800  | 5820   |            |          |       |        |         |         |      |        |        |        |      |       |        |      |       |        |      |         |        |        |         |         |        |         |     |       |       |      |        |       |        |   |   |
| Ad 12 X73487           | (5621) | AGG         | AA    | GC     | CACATGG | GA   | AGG  | T    | ACCGA | T     | CGT    | TGTTA      | AT       | TAAAG | G      | TTAGA   | ACTTTCT | A    | AGG    | TGTG   | TAAACA | ---- | C     | ATG    | CTC  | CT    | TCTT   | C    | AGCGTCC |        |        |         |         |        |         |     |       |       |      |        |       |        |   |   |
| SARS-CoV-2 NC_045512.2 | (1881) | AGG         | CT    | GC     | TCGTGTT | G    | T    | AC   | GAT   | CAATT | T      | TCT        | CCC      | G     | CACT   | -       | CTT     | G    | AAACT  | GTCTCA | A      | -    | ATTC  | TGTG   | CGT  | GTTTT | TACAG  | A    | AGG     | CCG    | CT     | ATAA    | CA      | ATACTA |         |     |       |       |      |        |       |        |   |   |
|                        |        |             |       |        |         |      |      |      |       |       |        | Section 61 |          |       |        |         |         |      |        |        |        |      |       |        |      |       |        |      |         |        |        |         |         |        |         |     |       |       |      |        |       |        |   |   |
|                        | (5821) | 5821        | 5830  | 5840   | 5850    | 5860 | 5870 | 5880 | 5890  | 5900  | 5917   |            |          |       |        |         |         |      |        |        |        |      |       |        |      |       |        |      |         |        |        |         |         |        |         |     |       |       |      |        |       |        |   |   |
| Ad 12 X73487           | (5713) | --          | AT    | GAAT   | G       | T    | GATT | GGT  | TT    | G--   | T      | AGG        | TG       | TAA   | GT     | CA      | CG      | TG   | TT     | CAC    | AA     | -    | TTTT  | CT     | GG   | TG    | G      | TGG  | CTATA   | AA     | AGGGG  | CG      | GGT     | CCTT   | -       | GGT | CTT   | CA    | -    | TCG    |       |        |   |   |
| SARS-CoV-2 NC_045512.2 | (1976) | GATG        | GAAT  | T      | T       | CA   | CA   | GTA  | TT    | CAC   | T      | GA         | G        | ACT   | CA     | T       | TGA     | --   | TG     | CT     | ATG    | ATG  | TT    | CA     | C    | ATC   | TG     | ATTT | G       | GCTACT | AA     | CAATCTA | G       | T      | TGTAAT  | GG  | C     | CT    | CA   | T      | TAC   |        |   |   |
|                        |        |             |       |        |         |      |      |      |       |       |        | Section 62 |          |       |        |         |         |      |        |        |        |      |       |        |      |       |        |      |         |        |        |         |         |        |         |     |       |       |      |        |       |        |   |   |
|                        | (5918) | 5918        | 5930  | 5940   | 5950    | 5960 | 5970 | 5980 | 5990  | 6000  | 6014   |            |          |       |        |         |         |      |        |        |        |      |       |        |      |       |        |      |         |        |        |         |         |        |         |     |       |       |      |        |       |        |   |   |
| Ad 12 X73487           | (5803) | CTT         | T     | CT     | T       | TC   | TGC  | TT   | C     | GCT   | TG     | -          | TT       | T     | ACG    | AGC     | CCAACT  | GGT  | TGGG   | T      | GAG    | TACA | C     | G      | CGT  | CA    | AG     | GC   | AGG     | C      | ATT    | ACCT    | CT      | G      | TACT    | CA  | ACGT  | G     | TCAG | TTTCT  |       |        |   |   |
| SARS-CoV-2 NC_045512.2 | (2071) | AGG         | TGG   | T      | G       | TTG  | TT   | C    | AG    | TT    | GAC    | T          | T        | CG    | -      | CAG     | TGGCTA  | ACT  | T      | AACAT  | -      | CTT  | TGG   | C      | ACT  | GT    | TTT    | AT   | G       | AAAA   | AC     | -       | TCA     | AAC    | C       | GT  | C     | CTTGA | TTG  | G      | CTT   | GAAG-- |   |   |
|                        |        |             |       |        |         |      |      |      |       |       |        | Section 63 |          |       |        |         |         |      |        |        |        |      |       |        |      |       |        |      |         |        |        |         |         |        |         |     |       |       |      |        |       |        |   |   |
|                        | (6015) | 6015        | 6020  | 6030   | 6040    | 6050 | 6060 | 6070 | 6080  | 6090  | 6111   |            |          |       |        |         |         |      |        |        |        |      |       |        |      |       |        |      |         |        |        |         |         |        |         |     |       |       |      |        |       |        |   |   |
| Ad 12 X73487           | (5899) | AT          | AA    | AC--   | G       | AT   | G    | AG   | G     | ATTT  | GAT    | GTTT       | AAT      | CG    | CCC    | CG      | CT      | GCAA | --     | TT     | CTT    | TC   | ATT   | AGG    | CT   | -     | TT     | C    | --      | TT     | C      | ATT     | TGA     | TCAG   | AAAAA   | ACT | ATTTT | TTT   | G    |        |       |        |   |   |
| SARS-CoV-2 NC_045512.2 | (2163) | AG          | AA    | G      | TTTA    | AG   | GA   | AG   | G     | T     | TAGA   | GTTT       | CT       | T     | AG     | AGA     | CG      | G    | TGGG   | AA     | ATT    | G    | T     | TAA    | ATT  | TAT   | CT     | CA   | AC      | CT     | G      | T       | G       | CTT    | G       | TGA | AATT  | G     | T    | CGGTGG | ACAAA | TT     | - | G |

SARS-CoV-2 & Ad12.apr

|                        |        |                                                                                                     |               |      |      |      |      |      |      |      |      |      |
|------------------------|--------|-----------------------------------------------------------------------------------------------------|---------------|------|------|------|------|------|------|------|------|------|
| Section 64             |        |                                                                                                     |               |      |      |      |      |      |      |      |      |      |
| Ad 12 X73487           | (6112) | 6112                                                                                                | 6120          | 6130 | 6140 | 6150 | 6160 | 6170 | 6180 | 6190 | 6208 |      |
| SARS-CoV-2 NC_045512.2 | (5989) | TTATCTA-GTTTGTAGCAAAGATCCGTACAAGG-CATTGGAAAGCAGCTTGGCTATAGATCTTAGGGTTTGATT-TTGTGCCCTATC             | GGCCCGTT      |      |      |      |      |      |      |      |      |      |
|                        | (2259) | TCACTGTGCAAAAGAAATTAAAGGAGAGTGTTTCAGACATTC--TTTAAGCTTGTAAATAAATTTTGGCTTTG-TGTGCTGACTCTATC           | ATTATTGG      |      |      |      |      |      |      |      |      |      |
| Section 65             |        |                                                                                                     |               |      |      |      |      |      |      |      |      |      |
| Ad 12 X73487           | (6209) | 6209                                                                                                | 6220          | 6230 | 6240 | 6250 | 6260 | 6270 | 6280 | 6290 | 6305 |      |
| SARS-CoV-2 NC_045512.2 | (6083) | CTTTTGC GCGCAAATTAGAGTTGCACTA--T---TGC GTGCGCAGGCATTTC-----CAGTGGGGAAAAATGGTGGTGCGCTCGT             | CAGATAGCAAAG- |      |      |      |      |      |      |      |      |      |
|                        | (2353) | TGGAGCTAAACTTAAAGCCTTGAATTAGGTGAAACATTTGTCAAGCACTCAAAGGGATTGTACAAGAAATGTGTTAAATC----                | CAGAGAAAGAAAC |      |      |      |      |      |      |      |      |      |
| Section 66             |        |                                                                                                     |               |      |      |      |      |      |      |      |      |      |
| Ad 12 X73487           | (6306) | 6306                                                                                                | 6320          | 6330 | 6340 | 6350 | 6360 | 6370 | 6380 | 6390 | 6402 |      |
| SARS-CoV-2 NC_045512.2 | (6169) | CGTAAGCGCCACC GCGATTATGCAGTGTAAACCAGATCTACGCTGGTAACTACTTCAACGCGCAAGCTTTCA----TT----GGTCC            | AGGCTAAACG    |      |      |      |      |      |      |      |      |      |
|                        | (2446) | TGGCCTACTCATGCTCTAAAGGCCCAA---AGAAATATCTCTTAGAGGGAGAAACACTTCCACAGAAAGTTTAAACAGAGGAAG                | TTGTCTTG      |      |      |      |      |      |      |      |      |      |
| Section 67             |        |                                                                                                     |               |      |      |      |      |      |      |      |      |      |
| Ad 12 X73487           | (6403) | 6403                                                                                                | 6410          | 6420 | 6430 | 6440 | 6450 | 6460 | 6470 | 6480 | 6499 |      |
| SARS-CoV-2 NC_045512.2 | (6258) | ---ACCGCCTTTTCTAGAACAAAA-AGGAGGAAGAACATCCAACTGATTTTCACTCGGGGGTCTGGCATCTATAGTAAAAATGC                | CAGGACAAAGATT |      |      |      |      |      |      |      |      |      |
|                        | (2540) | AAAACCTGGTGAATTTACAACCAATTAGAACAACTACTAGTGAAAGCTGTTGAAGCTCATTGGTTGTGTACACAGTTTGTATTAA               | CGGCTTA----TG |      |      |      |      |      |      |      |      |      |
| Section 68             |        |                                                                                                     |               |      |      |      |      |      |      |      |      |      |
| Ad 12 X73487           | (6500) | 6500                                                                                                | 6510          | 6520 | 6530 | 6540 | 6550 | 6560 | 6570 | 6580 | 6596 |      |
| SARS-CoV-2 NC_045512.2 | (6351) | TTTGTCAAAAATATCAATTTTGCAAGTGTAAATTTTCCA--GGGCCACCTGCCATTGC--CGCACGGCCAAATGCC--CGCTCATAG             | GGGTTAAGGGGA  |      |      |      |      |      |      |      |      |      |
|                        | (2633) | TTGCTCGAAATCAAGACACAGAAA-GTACTGTGCCCTTGCACTAATATGATGTAACAACAAATACCTTACACCTCAAAGGC                   | GGTGCACCAACA  |      |      |      |      |      |      |      |      |      |
| Section 69             |        |                                                                                                     |               |      |      |      |      |      |      |      |      |      |
| Ad 12 X73487           | (6597) | 6597                                                                                                | 6610          | 6620 | 6630 | 6640 | 6650 | 6660 | 6670 | 6680 | 6693 |      |
| SARS-CoV-2 NC_045512.2 | (6442) | GG----ACCCCAAAGC ATGGGGTG TGTGA GGCCGATGCA TACATG CCGCA AATATC ATATACATATATG GGCTCTTTTAGTACTCC      | TATGT AAGTA   |      |      |      |      |      |      |      |      |      |
|                        | (2729) | AAGGTTAC TTTTG GTG ATGACAC- TGTGATAG AAG- TGCAAGGT TACAAG AGTGTGA ATATCAC TT--TTGA ACTTGA TGAAAGGAT | TGATA AAGTA   |      |      |      |      |      |      |      |      |      |
| Section 70             |        |                                                                                                     |               |      |      |      |      |      |      |      |      |      |
| Ad 12 X73487           | (6694) | 6694                                                                                                | 6700          | 6710 | 6720 | 6730 | 6740 | 6750 | 6760 | 6770 | 6780 | 6790 |
| SARS-CoV-2 NC_045512.2 | (6535) | GGATAGCACCTGCCGCACGAATGCTGGCGCGAACGTATCATATAGCTCATGTGAAGGCGCAGATGTTGGGCCAAGATGTGTGCGCTGT            | GTGTT         |      |      |      |      |      |      |      |      |      |
|                        | (2822) | CTTAATGAGAAAG-TGCTCTGCC TATACAGTTGAACTCGTTACAGAAAGTAAATGAGTTTCGC-CTGTGTGTGTGCAGATGCTGTCATAAAAAC     | TTGCA         |      |      |      |      |      |      |      |      |      |

SARS-CoV-2 & Ad12.apr

|              |        |            |      |      |      |      |      |      |      |      |      |      |   |   |   |   |   |   |   |   |   |   |   |   |   |   |   |   |   |   |   |   |   |   |   |   |   |   |   |   |   |   |   |   |   |   |   |   |   |   |   |   |   |   |   |   |   |   |   |   |   |   |   |   |   |   |   |   |   |   |   |   |   |   |   |   |   |   |   |   |   |   |   |   |   |   |   |   |   |   |   |   |   |   |   |   |   |   |   |   |   |   |   |   |   |   |   |   |   |   |   |   |   |   |   |   |   |   |   |   |   |   |   |   |   |   |   |   |   |   |   |   |   |   |   |   |   |   |   |   |   |   |   |   |   |   |   |   |   |   |   |   |   |   |   |   |   |   |   |   |   |   |   |   |   |   |   |   |   |   |   |   |   |   |   |   |   |   |   |   |   |   |   |   |   |   |   |   |   |   |   |   |   |   |   |   |   |   |   |   |   |   |   |   |   |   |   |   |   |   |   |   |   |   |   |   |   |   |   |   |   |   |   |   |   |   |   |   |   |   |   |   |   |   |   |   |   |   |   |   |   |   |   |   |   |   |   |   |   |   |   |   |   |   |   |   |   |   |   |   |   |   |   |   |   |   |   |   |   |   |   |   |   |   |   |   |   |   |   |   |   |   |   |   |   |   |   |   |   |   |   |   |   |   |   |   |   |   |   |   |   |   |   |   |   |   |   |   |   |   |   |   |   |   |   |   |   |   |   |   |   |   |   |   |   |   |   |   |   |   |   |   |   |   |   |   |   |   |   |   |   |   |   |   |   |   |   |   |   |   |   |   |   |   |   |   |   |   |   |   |   |   |   |   |   |   |   |   |   |   |   |   |   |   |   |   |   |   |   |   |   |   |   |   |   |   |   |   |   |   |   |   |   |   |   |   |   |   |   |   |   |   |   |   |   |   |   |   |   |   |   |   |   |   |   |   |   |   |   |   |   |   |   |   |   |   |   |   |   |   |   |   |   |   |   |   |   |   |   |   |   |   |   |   |   |   |   |   |   |   |   |   |   |   |   |   |   |   |   |   |   |   |   |   |   |   |   |   |   |   |   |   |   |   |   |   |   |   |   |   |   |   |   |   |   |   |   |   |   |   |   |   |   |   |   |   |   |   |   |   |   |   |   |   |   |   |   |   |   |   |   |   |   |   |   |   |   |   |   |   |   |   |   |   |   |   |   |   |   |   |   |   |   |   |   |   |   |   |   |   |   |   |   |   |   |   |   |   |   |   |   |   |   |   |   |   |   |   |   |   |   |   |   |   |   |   |   |   |   |   |   |   |   |   |   |   |   |   |   |   |   |   |   |   |   |   |   |   |   |   |   |   |   |   |   |   |   |   |   |   |   |   |   |   |   |   |   |   |   |   |   |   |   |   |   |   |   |   |   |   |   |   |   |   |   |   |   |   |   |   |   |   |   |   |   |   |   |   |   |   |   |   |   |   |   |   |   |   |   |   |   |   |   |   |   |   |   |   |   |   |   |   |   |   |   |   |   |   |   |   |   |   |   |   |   |   |   |   |   |   |   |   |   |   |   |   |   |   |   |   |   |   |   |   |   |   |   |   |   |   |   |   |   |   |   |   |   |   |   |   |   |   |   |   |   |   |   |   |   |   |   |   |   |   |   |   |   |   |   |   |   |   |   |   |   |   |   |   |   |   |   |   |   |   |   |   |   |   |   |   |   |   |   |   |   |   |   |   |   |   |   |   |   |   |   |   |   |   |   |   |   |   |   |   |   |   |   |   |   |   |   |   |   |   |   |   |   |   |   |   |   |   |   |   |   |   |   |   |   |   |   |   |   |   |   |   |   |   |   |   |   |   |   |   |   |   |   |   |   |   |   |   |   |   |   |   |   |   |   |   |   |   |   |   |   |   |   |   |   |   |   |   |   |   |   |   |   |   |   |   |   |   |   |   |   |   |   |   |   |   |   |   |   |   |   |   |   |   |   |   |   |   |   |   |   |   |   |   |   |   |   |   |   |   |   |   |   |   |   |   |   |   |   |   |   |   |   |   |   |   |   |   |   |   |   |   |   |   |   |   |   |   |   |   |   |   |   |   |   |   |   |   |   |   |   |   |   |   |   |   |   |   |   |   |   |   |   |   |   |   |   |   |   |   |   |   |   |   |   |   |   |   |   |   |   |   |   |   |   |   |   |   |   |   |   |   |   |   |   |   |   |   |   |   |   |   |   |   |   |   |   |   |   |   |   |   |   |   |   |   |   |   |   |   |   |   |   |   |   |   |   |   |   |   |   |   |   |   |   |   |   |   |   |   |   |   |   |   |   |   |   |   |   |   |   |   |   |   |   |   |   |   |   |   |   |   |   |   |   |   |   |   |   |   |   |   |   |   |   |   |   |   |   |   |   |   |   |   |   |   |   |   |   |   |   |   |   |   |   |   |   |   |   |   |   |   |   |   |   |   |   |   |   |   |   |   |   |   |   |   |   |   |   |   |   |   |   |   |   |   |   |   |   |   |   |   |   |   |   |   |   |   |   |   |   |   |   |   |   |   |   |   |   |   |   |   |   |   |   |   |   |   |   |   |   |   |   |   |   |   |   |   |   |   |   |   |   |   |   |   |   |   |   |   |   |   |   |   |   |   |   |   |   |   |   |   |   |   |   |   |   |   |   |   |   |   |   |   |   |   |   |   |   |   |   |   |   |   |   |   |   |   |   |   |   |   |   |   |   |   |   |   |   |   |   |   |   |   |   |   |   |   |   |   |   |   |   |   |   |   |   |   |   |   |   |   |   |   |   |   |   |   |   |   |   |   |   |   |   |   |   |   |   |   |   |   |   |   |   |   |   |   |   |   |   |   |   |   |   |   |   |   |   |   |   |   |   |   |   |   |   |   |   |   |   |   |   |   |   |   |   |   |   |   |   |   |   |   |   |   |   |   |   |   |   |   |   |   |   |   |   |   |   |   |   |   |   |   |   |   |   |   |   |   |   |
|--------------|--------|------------|------|------|------|------|------|------|------|------|------|------|---|---|---|---|---|---|---|---|---|---|---|---|---|---|---|---|---|---|---|---|---|---|---|---|---|---|---|---|---|---|---|---|---|---|---|---|---|---|---|---|---|---|---|---|---|---|---|---|---|---|---|---|---|---|---|---|---|---|---|---|---|---|---|---|---|---|---|---|---|---|---|---|---|---|---|---|---|---|---|---|---|---|---|---|---|---|---|---|---|---|---|---|---|---|---|---|---|---|---|---|---|---|---|---|---|---|---|---|---|---|---|---|---|---|---|---|---|---|---|---|---|---|---|---|---|---|---|---|---|---|---|---|---|---|---|---|---|---|---|---|---|---|---|---|---|---|---|---|---|---|---|---|---|---|---|---|---|---|---|---|---|---|---|---|---|---|---|---|---|---|---|---|---|---|---|---|---|---|---|---|---|---|---|---|---|---|---|---|---|---|---|---|---|---|---|---|---|---|---|---|---|---|---|---|---|---|---|---|---|---|---|---|---|---|---|---|---|---|---|---|---|---|---|---|---|---|---|---|---|---|---|---|---|---|---|---|---|---|---|---|---|---|---|---|---|---|---|---|---|---|---|---|---|---|---|---|---|---|---|---|---|---|---|---|---|---|---|---|---|---|---|---|---|---|---|---|---|---|---|---|---|---|---|---|---|---|---|---|---|---|---|---|---|---|---|---|---|---|---|---|---|---|---|---|---|---|---|---|---|---|---|---|---|---|---|---|---|---|---|---|---|---|---|---|---|---|---|---|---|---|---|---|---|---|---|---|---|---|---|---|---|---|---|---|---|---|---|---|---|---|---|---|---|---|---|---|---|---|---|---|---|---|---|---|---|---|---|---|---|---|---|---|---|---|---|---|---|---|---|---|---|---|---|---|---|---|---|---|---|---|---|---|---|---|---|---|---|---|---|---|---|---|---|---|---|---|---|---|---|---|---|---|---|---|---|---|---|---|---|---|---|---|---|---|---|---|---|---|---|---|---|---|---|---|---|---|---|---|---|---|---|---|---|---|---|---|---|---|---|---|---|---|---|---|---|---|---|---|---|---|---|---|---|---|---|---|---|---|---|---|---|---|---|---|---|---|---|---|---|---|---|---|---|---|---|---|---|---|---|---|---|---|---|---|---|---|---|---|---|---|---|---|---|---|---|---|---|---|---|---|---|---|---|---|---|---|---|---|---|---|---|---|---|---|---|---|---|---|---|---|---|---|---|---|---|---|---|---|---|---|---|---|---|---|---|---|---|---|---|---|---|---|---|---|---|---|---|---|---|---|---|---|---|---|---|---|---|---|---|---|---|---|---|---|---|---|---|---|---|---|---|---|---|---|---|---|---|---|---|---|---|---|---|---|---|---|---|---|---|---|---|---|---|---|---|---|---|---|---|---|---|---|---|---|---|---|---|---|---|---|---|---|---|---|---|---|---|---|---|---|---|---|---|---|---|---|---|---|---|---|---|---|---|---|---|---|---|---|---|---|---|---|---|---|---|---|---|---|---|---|---|---|---|---|---|---|---|---|---|---|---|---|---|---|---|---|---|---|---|---|---|---|---|---|---|---|---|---|---|---|---|---|---|---|---|---|---|---|---|---|---|---|---|---|---|---|---|---|---|---|---|---|---|---|---|---|---|---|---|---|---|---|---|---|---|---|---|---|---|---|---|---|---|---|---|---|---|---|---|---|---|---|---|---|---|---|---|---|---|---|---|---|---|---|---|---|---|---|---|---|---|---|---|---|---|---|---|---|---|---|---|---|---|---|---|---|---|---|---|---|---|---|---|---|---|---|---|---|---|---|---|---|---|---|---|---|---|---|---|---|---|---|---|---|---|---|---|---|---|---|---|---|---|---|---|---|---|---|---|---|---|---|---|---|---|---|---|---|---|---|---|---|---|---|---|---|---|---|---|---|---|---|---|---|---|---|---|---|---|---|---|---|---|---|---|---|---|---|---|---|---|---|---|---|---|---|---|---|---|---|---|---|---|---|---|---|---|---|---|---|---|---|---|---|---|---|---|---|---|---|---|---|---|---|---|---|---|---|---|---|---|---|---|---|---|---|---|---|---|---|---|---|---|---|---|---|---|---|---|---|---|---|---|---|---|---|---|---|---|---|---|---|---|---|---|---|---|---|---|---|---|---|---|---|---|---|---|---|---|---|---|---|---|---|---|---|---|---|---|---|---|---|---|---|---|---|---|---|---|---|---|---|---|---|---|---|---|---|---|---|---|---|---|---|---|---|---|---|---|---|---|---|---|---|---|---|---|---|---|---|---|---|---|---|---|---|---|---|---|---|---|---|---|---|---|---|---|---|---|---|---|---|---|---|---|---|---|---|---|---|---|---|---|---|---|---|---|---|---|---|---|---|---|---|---|---|---|---|---|---|---|---|---|---|---|---|---|---|---|---|---|---|---|---|---|---|---|---|---|---|---|---|---|---|---|---|---|---|---|---|---|---|---|---|---|---|---|---|---|---|---|---|---|---|---|---|---|---|---|---|---|---|---|---|---|---|---|---|---|---|---|---|---|---|---|---|---|---|---|---|---|---|---|---|---|---|---|---|---|---|---|---|---|---|---|---|---|---|---|---|---|---|---|---|---|---|---|---|---|---|---|---|---|---|---|---|---|---|---|---|---|---|---|---|---|---|---|---|---|---|---|---|---|---|---|---|---|---|---|---|---|---|---|---|---|---|---|---|---|---|---|---|---|---|---|---|---|---|---|---|---|---|---|---|---|---|---|---|---|---|---|---|---|---|---|---|---|---|---|---|---|---|---|---|---|---|---|---|---|---|---|---|---|---|---|---|---|---|---|---|---|---|---|---|---|---|---|---|---|---|---|---|---|---|---|---|---|---|---|---|---|---|---|---|---|---|---|---|---|---|---|---|---|---|---|---|---|---|---|---|---|---|---|---|---|---|---|---|---|---|---|---|---|---|---|---|---|---|---|---|---|---|---|
|              |        | Section 71 |      |      |      |      |      |      |      |      |      |      |   |   |   |   |   |   |   |   |   |   |   |   |   |   |   |   |   |   |   |   |   |   |   |   |   |   |   |   |   |   |   |   |   |   |   |   |   |   |   |   |   |   |   |   |   |   |   |   |   |   |   |   |   |   |   |   |   |   |   |   |   |   |   |   |   |   |   |   |   |   |   |   |   |   |   |   |   |   |   |   |   |   |   |   |   |   |   |   |   |   |   |   |   |   |   |   |   |   |   |   |   |   |   |   |   |   |   |   |   |   |   |   |   |   |   |   |   |   |   |   |   |   |   |   |   |   |   |   |   |   |   |   |   |   |   |   |   |   |   |   |   |   |   |   |   |   |   |   |   |   |   |   |   |   |   |   |   |   |   |   |   |   |   |   |   |   |   |   |   |   |   |   |   |   |   |   |   |   |   |   |   |   |   |   |   |   |   |   |   |   |   |   |   |   |   |   |   |   |   |   |   |   |   |   |   |   |   |   |   |   |   |   |   |   |   |   |   |   |   |   |   |   |   |   |   |   |   |   |   |   |   |   |   |   |   |   |   |   |   |   |   |   |   |   |   |   |   |   |   |   |   |   |   |   |   |   |   |   |   |   |   |   |   |   |   |   |   |   |   |   |   |   |   |   |   |   |   |   |   |   |   |   |   |   |   |   |   |   |   |   |   |   |   |   |   |   |   |   |   |   |   |   |   |   |   |   |   |   |   |   |   |   |   |   |   |   |   |   |   |   |   |   |   |   |   |   |   |   |   |   |   |   |   |   |   |   |   |   |   |   |   |   |   |   |   |   |   |   |   |   |   |   |   |   |   |   |   |   |   |   |   |   |   |   |   |   |   |   |   |   |   |   |   |   |   |   |   |   |   |   |   |   |   |   |   |   |   |   |   |   |   |   |   |   |   |   |   |   |   |   |   |   |   |   |   |   |   |   |   |   |   |   |   |   |   |   |   |   |   |   |   |   |   |   |   |   |   |   |   |   |   |   |   |   |   |   |   |   |   |   |   |   |   |   |   |   |   |   |   |   |   |   |   |   |   |   |   |   |   |   |   |   |   |   |   |   |   |   |   |   |   |   |   |   |   |   |   |   |   |   |   |   |   |   |   |   |   |   |   |   |   |   |   |   |   |   |   |   |   |   |   |   |   |   |   |   |   |   |   |   |   |   |   |   |   |   |   |   |   |   |   |   |   |   |   |   |   |   |   |   |   |   |   |   |   |   |   |   |   |   |   |   |   |   |   |   |   |   |   |   |   |   |   |   |   |   |   |   |   |   |   |   |   |   |   |   |   |   |   |   |   |   |   |   |   |   |   |   |   |   |   |   |   |   |   |   |   |   |   |   |   |   |   |   |   |   |   |   |   |   |   |   |   |   |   |   |   |   |   |   |   |   |   |   |   |   |   |   |   |   |   |   |   |   |   |   |   |   |   |   |   |   |   |   |   |   |   |   |   |   |   |   |   |   |   |   |   |   |   |   |   |   |   |   |   |   |   |   |   |   |   |   |   |   |   |   |   |   |   |   |   |   |   |   |   |   |   |   |   |   |   |   |   |   |   |   |   |   |   |   |   |   |   |   |   |   |   |   |   |   |   |   |   |   |   |   |   |   |   |   |   |   |   |   |   |   |   |   |   |   |   |   |   |   |   |   |   |   |   |   |   |   |   |   |   |   |   |   |   |   |   |   |   |   |   |   |   |   |   |   |   |   |   |   |   |   |   |   |   |   |   |   |   |   |   |   |   |   |   |   |   |   |   |   |   |   |   |   |   |   |   |   |   |   |   |   |   |   |   |   |   |   |   |   |   |   |   |   |   |   |   |   |   |   |   |   |   |   |   |   |   |   |   |   |   |   |   |   |   |   |   |   |   |   |   |   |   |   |   |   |   |   |   |   |   |   |   |   |   |   |   |   |   |   |   |   |   |   |   |   |   |   |   |   |   |   |   |   |   |   |   |   |   |   |   |   |   |   |   |   |   |   |   |   |   |   |   |   |   |   |   |   |   |   |   |   |   |   |   |   |   |   |   |   |   |   |   |   |   |   |   |   |   |   |   |   |   |   |   |   |   |   |   |   |   |   |   |   |   |   |   |   |   |   |   |   |   |   |   |   |   |   |   |   |   |   |   |   |   |   |   |   |   |   |   |   |   |   |   |   |   |   |   |   |   |   |   |   |   |   |   |   |   |   |   |   |   |   |   |   |   |   |   |   |   |   |   |   |   |   |   |   |   |   |   |   |   |   |   |   |   |   |   |   |   |   |   |   |   |   |   |   |   |   |   |   |   |   |   |   |   |   |   |   |   |   |   |   |   |   |   |   |   |   |   |   |   |   |   |   |   |   |   |   |   |   |   |   |   |   |   |   |   |   |   |   |   |   |   |   |   |   |   |   |   |   |   |   |   |   |   |   |   |   |   |   |   |   |   |   |   |   |   |   |   |   |   |   |   |   |   |   |   |   |   |   |   |   |   |   |   |   |   |   |   |   |   |   |   |   |   |   |   |   |   |   |   |   |   |   |   |   |   |   |   |   |   |   |   |   |   |   |   |   |   |   |   |   |   |   |   |   |   |   |   |   |   |   |   |   |   |   |   |   |   |   |   |   |   |   |   |   |   |   |   |   |   |   |   |   |   |   |   |   |   |   |   |   |   |   |   |   |   |   |   |   |   |   |   |   |   |   |   |   |   |   |   |   |   |   |   |   |   |   |   |   |   |   |   |   |   |   |   |   |   |   |   |   |   |   |   |   |   |   |   |   |   |   |   |   |   |   |   |   |   |   |   |   |   |   |   |   |   |   |   |   |   |   |   |   |   |   |   |   |   |   |   |   |   |   |   |   |   |   |   |   |   |   |   |   |   |   |   |   |   |   |   |   |   |   |   |   |   |   |   |   |   |   |   |   |   |   |   |   |   |   |   |   |   |   |   |   |   |   |   |   |   |   |   |   |   |   |   |
|              |        | (6791)     | 6791 | 6800 | 6810 | 6820 | 6830 | 6840 | 6850 | 6860 | 6870 | 6887 |   |   |   |   |   |   |   |   |   |   |   |   |   |   |   |   |   |   |   |   |   |   |   |   |   |   |   |   |   |   |   |   |   |   |   |   |   |   |   |   |   |   |   |   |   |   |   |   |   |   |   |   |   |   |   |   |   |   |   |   |   |   |   |   |   |   |   |   |   |   |   |   |   |   |   |   |   |   |   |   |   |   |   |   |   |   |   |   |   |   |   |   |   |   |   |   |   |   |   |   |   |   |   |   |   |   |   |   |   |   |   |   |   |   |   |   |   |   |   |   |   |   |   |   |   |   |   |   |   |   |   |   |   |   |   |   |   |   |   |   |   |   |   |   |   |   |   |   |   |   |   |   |   |   |   |   |   |   |   |   |   |   |   |   |   |   |   |   |   |   |   |   |   |   |   |   |   |   |   |   |   |   |   |   |   |   |   |   |   |   |   |   |   |   |   |   |   |   |   |   |   |   |   |   |   |   |   |   |   |   |   |   |   |   |   |   |   |   |   |   |   |   |   |   |   |   |   |   |   |   |   |   |   |   |   |   |   |   |   |   |   |   |   |   |   |   |   |   |   |   |   |   |   |   |   |   |   |   |   |   |   |   |   |   |   |   |   |   |   |   |   |   |   |   |   |   |   |   |   |   |   |   |   |   |   |   |   |   |   |   |   |   |   |   |   |   |   |   |   |   |   |   |   |   |   |   |   |   |   |   |   |   |   |   |   |   |   |   |   |   |   |   |   |   |   |   |   |   |   |   |   |   |   |   |   |   |   |   |   |   |   |   |   |   |   |   |   |   |   |   |   |   |   |   |   |   |   |   |   |   |   |   |   |   |   |   |   |   |   |   |   |   |   |   |   |   |   |   |   |   |   |   |   |   |   |   |   |   |   |   |   |   |   |   |   |   |   |   |   |   |   |   |   |   |   |   |   |   |   |   |   |   |   |   |   |   |   |   |   |   |   |   |   |   |   |   |   |   |   |   |   |   |   |   |   |   |   |   |   |   |   |   |   |   |   |   |   |   |   |   |   |   |   |   |   |   |   |   |   |   |   |   |   |   |   |   |   |   |   |   |   |   |   |   |   |   |   |   |   |   |   |   |   |   |   |   |   |   |   |   |   |   |   |   |   |   |   |   |   |   |   |   |   |   |   |   |   |   |   |   |   |   |   |   |   |   |   |   |   |   |   |   |   |   |   |   |   |   |   |   |   |   |   |   |   |   |   |   |   |   |   |   |   |   |   |   |   |   |   |   |   |   |   |   |   |   |   |   |   |   |   |   |   |   |   |   |   |   |   |   |   |   |   |   |   |   |   |   |   |   |   |   |   |   |   |   |   |   |   |   |   |   |   |   |   |   |   |   |   |   |   |   |   |   |   |   |   |   |   |   |   |   |   |   |   |   |   |   |   |   |   |   |   |   |   |   |   |   |   |   |   |   |   |   |   |   |   |   |   |   |   |   |   |   |   |   |   |   |   |   |   |   |   |   |   |   |   |   |   |   |   |   |   |   |   |   |   |   |   |   |   |   |   |   |   |   |   |   |   |   |   |   |   |   |   |   |   |   |   |   |   |   |   |   |   |   |   |   |   |   |   |   |   |   |   |   |   |   |   |   |   |   |   |   |   |   |   |   |   |   |   |   |   |   |   |   |   |   |   |   |   |   |   |   |   |   |   |   |   |   |   |   |   |   |   |   |   |   |   |   |   |   |   |   |   |   |   |   |   |   |   |   |   |   |   |   |   |   |   |   |   |   |   |   |   |   |   |   |   |   |   |   |   |   |   |   |   |   |   |   |   |   |   |   |   |   |   |   |   |   |   |   |   |   |   |   |   |   |   |   |   |   |   |   |   |   |   |   |   |   |   |   |   |   |   |   |   |   |   |   |   |   |   |   |   |   |   |   |   |   |   |   |   |   |   |   |   |   |   |   |   |   |   |   |   |   |   |   |   |   |   |   |   |   |   |   |   |   |   |   |   |   |   |   |   |   |   |   |   |   |   |   |   |   |   |   |   |   |   |   |   |   |   |   |   |   |   |   |   |   |   |   |   |   |   |   |   |   |   |   |   |   |   |   |   |   |   |   |   |   |   |   |   |   |   |   |   |   |   |   |   |   |   |   |   |   |   |   |   |   |   |   |   |   |   |   |   |   |   |   |   |   |   |   |   |   |   |   |   |   |   |   |   |   |   |   |   |   |   |   |   |   |   |   |   |   |   |   |   |   |   |   |   |   |   |   |   |   |   |   |   |   |   |   |   |   |   |   |   |   |   |   |   |   |   |   |   |   |   |   |   |   |   |   |   |   |   |   |   |   |   |   |   |   |   |   |   |   |   |   |   |   |   |   |   |   |   |   |   |   |   |   |   |   |   |   |   |   |   |   |   |   |   |   |   |   |   |   |   |   |   |   |   |   |   |   |   |   |   |   |   |   |   |   |   |   |   |   |   |   |   |   |   |   |   |   |   |   |   |   |   |   |   |   |   |   |   |   |   |   |   |   |   |   |   |   |   |   |   |   |   |   |   |   |   |   |   |   |   |   |   |   |   |   |   |   |   |   |   |   |   |   |   |   |   |   |   |   |   |   |   |   |   |   |   |   |   |   |   |   |   |   |   |   |   |   |   |   |   |   |   |   |   |   |   |   |   |   |   |   |   |   |   |   |   |   |   |   |   |   |   |   |   |   |   |   |   |   |   |   |   |   |   |   |   |   |   |   |   |   |   |   |   |   |   |   |   |   |   |   |   |   |   |   |   |   |   |   |   |   |   |   |   |   |   |   |   |   |   |   |   |   |   |   |   |   |   |   |   |   |   |   |   |   |   |   |   |   |   |   |   |   |   |   |   |   |   |   |   |   |   |   |   |   |   |   |   |   |   |   |   |   |   |   |   |   |   |   |   |   |   |   |   |   |   |   |   |   |   |   |   |   |   |   |   |   |   |   |   |   |   |   |   |
| Ad 12 X73487 | (6632) | TTTC       | G    | GCG  | C    | G    | T    | A    | C    | A    | A    | A    | A | T | T | G | T | C | T | G | A | A | A | T | T | G | T | C | T | G | A | A | A | T | T | G | T | G | A | G | A | G | T | T | A | G | A | A | T | G | T | C | C | A | A | G | A | C | A | C | A | T | T | A | A | A | T | G | T | C | C | C | G | T | C | A | A | G | A | C | A | C | A | T | T | A | A | A | T | G | T | C | C | C | A | A | G | A | C | A | C | A | T | T | A | A | A | T | G | T | C | C | C | A | A | G | A | C | A | C | A | T | T | A | A | A | T | G | T | C | C | C | A | A | G | A | C | A | C | A | T | T | A | A | A | T | G | T | C | C | C | A | A | G | A | C | A | C | A | T | T | A | A | A | T | G | T | C | C | C | A | A | G | A | C | A | C | A | T | T | A | A | A | T | G | T | C | C | C | A | A | G | A | C | A | C | A | T | T | A | A | A | T | G | T | C | C | C | A | A | G | A | C | A | C | A | T | T | A | A | A | T | G | T | C | C | C | A | A | G | A | C | A | C | A | T | T | A | A | A | T | G | T | C | C | C | A | A | G | A | C | A | C | A | T | T | A | A | A | T | G | T | C | C | C | A | A | G | A | C | A | C | A | T | T | A | A | A | T | G | T | C | C | C | A | A | G | A | C | A | C | A | T | T | A | A | A | T | G | T | C | C | C | A | A | G | A | C | A | C | A | T | T | A | A | A | T | G | T | C | C | C | A | A | G | A | C | A | C | A | T | T | A | A | A | T | G | T | C | C | C | A | A | G | A | C | A | C | A | T | T | A | A | A | T | G | T | C | C | C | A | A | G | A | C | A | C | A | T | T | A | A | A | T | G | T | C | C | C | A | A | G | A | C | A | C | A | T | T | A | A | A | T | G | T | C | C | C | A | A | G | A | C | A | C | A | T | T | A | A | A | T | G | T | C | C | C | A | A | G | A | C | A | C | A | T | T | A | A | A | T | G | T | C | C | C | A | A | G | A | C | A | C | A | T | T | A | A | A | T | G | T | C | C | C | A | A | G | A | C | A | C | A | T | T | A | A | A | T | G | T | C | C | C | A | A | G | A | C | A | C | A | T | T | A | A | A | T | G | T | C | C | C | A | A | G | A | C | A | C | A | T | T | A | A | A | T | G | T | C | C | C | A | A | G | A | C | A | C | A | T | T | A | A | A | T | G | T | C | C | C | A | A | G | A | C | A | C | A | T | T | A | A | A | T | G | T | C | C | C | A | A | G | A | C | A | C | A | T | T | A | A | A | T | G | T | C | C | C | A | A | G | A | C | A | C | A | T | T | A | A | A | T | G | T | C | C | C | A | A | G | A | C | A | C | A | T | T | A | A | A | T | G | T | C | C | C | A | A | G | A | C | A | C | A | T | T | A | A | A | T | G | T | C | C | C | A | A | G | A | C | A | C | A | T | T | A | A | A | T | G | T | C | C | C | A | A | G | A | C | A | C | A | T | T | A | A | A | T | G | T | C | C | C | A | A | G | A | C | A | C | A | T | T | A | A | A | T | G | T | C | C | C | A | A | G | A | C | A | C | A | T | T | A | A | A | T | G | T | C | C | C | A | A | G | A | C | A | C | A | T | T | A | A | A | T | G | T | C | C | C | A | A | G | A | C | A | C | A | T | T | A | A | A | T | G | T | C | C | C | A | A | G | A | C | A | C | A | T | T | A | A | A | T | G | T | C | C | C | A | A | G | A | C | A | C | A | T | T | A | A | A | T | G | T | C | C | C | A | A | G | A | C | A | C | A | T | T | A | A | A | T | G | T | C | C | C | A | A | G | A | C | A | C | A | T | T | A | A | A | T | G | T | C | C | C | A | A | G | A | C | A | C | A | T | T | A | A | A | T | G | T | C | C | C | A | A | G | A | C | A | C | A | T | T | A | A | A | T | G | T | C | C | C | A | A | G | A | C | A | C | A | T | T | A | A | A | T | G | T | C | C | C | A | A | G | A | C | A | C | A | T | T | A | A | A | T | G | T | C | C | C | A | A | G | A | C | A | C | A | T | T | A | A | A | T | G | T | C | C | C | A | A | G | A | C | A | C | A | T | T | A | A | A | T | G | T | C | C | C | A | A | G | A | C | A | C | A | T | T | A | A | A | T | G | T | C | C | C | A | A | G | A | C | A | C | A | T | T | A | A | A | T | G | T | C | C | C | A | A | G | A | C | A | C | A | T | T | A | A | A | T | G | T | C | C | C | A | A | G | A | C | A | C | A | T | T | A | A | A | T | G | T | C | C | C | A | A | G | A | C | A | C | A | T | T | A | A | A | T | G | T | C | C | C | A | A | G | A | C | A | C | A | T | T | A | A | A | T | G | T | C | C | C | A | A | G | A | C | A | C | A | T | T | A | A | A | T | G | T | C | C | C | A | A | G | A | C | A | C | A | T | T | A | A | A | T | G | T | C | C | C | A | A | G | A | C | A | C | A | T | T | A | A | A | T | G | T | C | C | C | A | A | G | A | C | A | C | A | T | T | A | A | A | T | G | T | C | C | C | A | A | G | A | C | A | C | A | T | T | A | A | A | T | G | T | C | C | C | A | A | G | A | C | A | C | A | T | T | A | A | A | T | G | T | C | C | C | A | A | G | A | C | A | C | A | T | T | A | A | A | T | G | T | C | C | C | A | A | G | A | C | A | C | A | T | T | A | A | A | T | G | T | C | C | C | A | A | G | A | C | A | C | A | T | T | A | A | A | T | G | T | C | C | C | A | A | G | A | C | A | C | A | T | T | A | A | A | T | G | T | C | C | C | A | A | G | A | C | A | C | A | T | T | A | A | A | T | G | T | C | C | C | A | A | G | A | C | A | C | A | T | T | A | A | A | T | G | T | C | C | C | A | A | G | A | C | A | C | A | T | T | A | A | A | T | G | T | C | C | C | A | A | G | A | C | A | C | A | T | T | A | A | A | T | G | T | C | C | C | A | A | G | A | C |

SARS-CoV-2 & Ad12.apr

|                        |        |          |           |               |             |           |         |             |           |              |                       |                           |                                      |                             |
|------------------------|--------|----------|-----------|---------------|-------------|-----------|---------|-------------|-----------|--------------|-----------------------|---------------------------|--------------------------------------|-----------------------------|
| Section 78             |        |          |           |               |             |           |         |             |           |              |                       |                           |                                      |                             |
|                        | (7470) | 7470     | 7480      | 7490          | 7500        | 7510      | 7520    | 7530        | 7540      | 7550         | 7566                  |                           |                                      |                             |
| Ad 12 X73487           | (7291) | TTAA     | TATTGTG   | TCCTACTATATAC | AACTCTACA   | AATCTTG   | GCTCAC  | CTTAAT      | TGCAGGGGC | TC           | TTTTAAGATCTTTCGTAG--- | GAAAGATCTTTCAA            |                                      |                             |
| SARS-CoV-2 NC_045512.2 | (3556) | TAAAG    | TGGGTG    | G             | TAGTTGTGTTT | AA        | GCGGACA | CAATCTT     | GCTAAAC   | ACTGTCTT     | CATGTTGTC             | GGCCCAATGTTTAACA          | AAAGGTGAAGACATTTCAA                  |                             |
| Section 79             |        |          |           |               |             |           |         |             |           |              |                       |                           |                                      |                             |
|                        | (7567) | 7567     | 7580      | 7590          | 7600        | 7610      | 7620    | 7630        | 7640      | 7650         | 7663                  |                           |                                      |                             |
| Ad 12 X73487           | (7385) | GC---    | GC        | GACTAG        | TCCGTTTTCTT | CTTGAGCC  | CATTGAG | ACAAGTGTG   | GA        | TTTTTTT      | TGTAA                 | AAAA                      | GT-CATCCAAAGATCAGTAGCTAAGGAGGTT      |                             |
| SARS-CoV-2 NC_045512.2 | (3653) | CTTCTTAA | GAGTGC    | T             | TATGAAAA    | TTT       | T       | TAATCAGCA   | CGAAG     | TTCTACTTG    | CA                    | CCATTATTATCAGCTGGTATTTTTG | GTGCTGACCTATACAT-TC                  |                             |
| Section 80             |        |          |           |               |             |           |         |             |           |              |                       |                           |                                      |                             |
|                        | (7664) | 7664     | 7670      | 7680          | 7690        | 7700      | 7710    | 7720        | 7730      | 7740         | 7750                  | 7760                      |                                      |                             |
| Ad 12 X73487           | (7477) | TG       | TAA       | CGGTTTC       | TATAGGTAC   | GAACTGTTG | ACCGAC  | CTTCATTT    | T         | TCTGGGG      | T                     | TAA                       | GCAGTAGAAAGTAGAGTCTTTTTCCCATTTGGTCCC |                             |
| SARS-CoV-2 NC_045512.2 | (3748) | TT       | TAA       | GAGTTTG       | T           | TAGATAC   | TGTT    | CGCACAA     | ATGTCT    | ACTTAGCTGTCT | TTGAT                 | AAAAATCTCT                | ATGACAAACTTGTTC                      | CAAGCTTTTGGGAA--A           |
| Section 81             |        |          |           |               |             |           |         |             |           |              |                       |                           |                                      |                             |
|                        | (7761) | 7761     | 7770      | 7780          | 7790        | 7800      | 7810    | 7820        | 7830      | 7840         | 7857                  |                           |                                      |                             |
| Ad 12 X73487           | (7574) | AT       | CCAAGT    | TCTAA         | TGCAAGTTGT  | AAGGCAT   | GTTTG   | GACAAGATT   | GTCAT     | CCCCAGACAGT  | TT                    | CATCAC                    | CAGCATAAATGGGACAAAGTTGCTTTC---       | C                           |
| SARS-CoV-2 NC_045512.2 | (3842) | AT       | GAAAGAGT  | GAA           | AGCAAGTTGA  | ACA-AA    | AGATCG  | CTGAGATT    | CCT       | AAA--        | GAGGAAG               | TTAAGC                    | -CATTTATAACTGAAAGTAAAC               | -CTTCAGTTG                  |
| Section 82             |        |          |           |               |             |           |         |             |           |              |                       |                           |                                      |                             |
|                        | (7858) | 7858     | 7870      | 7880          | 7890        | 7900      | 7910    | 7920        | 7930      | 7940         | 7954                  |                           |                                      |                             |
| Ad 12 X73487           | (7668) | AA       | AT        | GCCCCA        | TCCAGGTGTAG | GTTTCTAC  | ATCATAG | GTAA        | TAAAA     | GGCGCTCAGT   | GCGAGGATG             | CGAAC                     | CGATTGGGA                            | AAAAGTGGATCTCTCTGC          |
| SARS-CoV-2 NC_045512.2 | (3933) | AA       | CAGAGAAAA | A             | CAAGATGATAG | A         | GAAAAAT | -CA         | AAGCTTGT  | GT           | TGAAG                 | -----AGTT--               | ACA--AC--                            | AACTCTGGAAGAACTAAGTTCCTCACA |
| Section 83             |        |          |           |               |             |           |         |             |           |              |                       |                           |                                      |                             |
|                        | (7955) | 7955     | 7960      | 7970          | 7980        | 7990      | 8000    | 8010        | 8020      | 8030         | 8040                  | 8051                      |                                      |                             |
| Ad 12 X73487           | (7765) | C        | ACCAGTTTG | GAA           | GAATGGCTG   | TGTGAT    | GAAAG   | TAGAAATCT   | CGTCGGCG  | G            | GACAGAGCAT            | TCATGCTGA                 | TGTTTGTAA                            | AAGCGTGGCAGTGT              |
| SARS-CoV-2 NC_045512.2 | (4016) | G        | AAAACCTTG | TTACTTT       | TATATTGAC   | ATTAATG   | GC      | AA-T-----CT | TCATCCAG  | A            | TTCTGTCAC             | CTCTGTTAGTGACAT           | TGA---                               | CAT-CACTTCTTT               |
| Section 84             |        |          |           |               |             |           |         |             |           |              |                       |                           |                                      |                             |
|                        | (8052) | 8052     | 8060      | 8070          | 8080        | 8090      | 8100    | 8110        | 8120      | 8130         | 8148                  |                           |                                      |                             |
| Ad 12 X73487           | (7862) | CGCATC   | GTTGC     | ACGGGCTG      | TATCTGT     | TGAA      | TGA     | G           | GTGTACCT  | GG           | CGG                   | CCTCGCACCAGAAAGCAG        | A-TGG                                | GAAAATCAATACCACTTGGCAGCTGCC |
| SARS-CoV-2 NC_045512.2 | (4102) | AAA---   | GAAAG     | ATGCT         | CCATAT      | ATAGTGG   | TGATGT  | TGTTCAAG    | AGG       | GTGTTT-----  | TAAC                  | CT-GCTGTGGTT              | ATACCACT                             | TAC-TAAAGGCT                |

SARS-CoV-2 & Ad12.apr

|                        |        |                                                    |      |      |      |      |      |      |      |      |      |            |
|------------------------|--------|----------------------------------------------------|------|------|------|------|------|------|------|------|------|------------|
|                        |        |                                                    |      |      |      |      |      |      |      |      |      | Section 85 |
|                        | (8149) | 8149                                               | 8160 | 8170 | 8180 | 8190 | 8200 | 8210 | 8220 | 8230 | 8245 |            |
| Ad 12 X73487           | (7958) | GTTCGTCCTCTTCCTCTTCTGCTGCATTGCCACTACCGTTTGATCCTC   |      |      |      |      |      |      |      |      |      |            |
| SARS-CoV-2 NC_045512.2 | (4184) | GGTGGCACTACTGAAATGCTAGCGAAAGCTTTGAGAAAAGTG-CCAACA  |      |      |      |      |      |      |      |      |      |            |
|                        |        |                                                    |      |      |      |      |      |      |      |      |      | Section 86 |
|                        | (8246) | 8246                                               | 8260 | 8270 | 8280 | 8290 | 8300 | 8310 | 8320 | 8330 | 8342 |            |
| Ad 12 X73487           | (8052) | CCAGATTTCAGCACGAGAGGGGCGGAAACGGGAAATCAGGGGTACAGCC  |      |      |      |      |      |      |      |      |      |            |
| SARS-CoV-2 NC_045512.2 | (4280) | GTAGAGGAGGCCAAGACAGTGTCTTAAAGTGCCTTTACATCTACCA-TC  |      |      |      |      |      |      |      |      |      |            |
|                        |        |                                                    |      |      |      |      |      |      |      |      |      | Section 87 |
|                        | (8343) | 8343                                               | 8350 | 8360 | 8370 | 8380 | 8390 | 8400 | 8410 | 8420 | 8439 |            |
| Ad 12 X73487           | (8148) | GACAGCGCGCAAGTTGACTTCGCACAGGCGGGTAAAGAGCAGGCTGGAG  |      |      |      |      |      |      |      |      |      |            |
| SARS-CoV-2 NC_045512.2 | (4376) | -----GTTTCGTTGAAATTGTCGAGAAATGCTTGCAATGCAGAGAGAA   |      |      |      |      |      |      |      |      |      |            |
|                        |        |                                                    |      |      |      |      |      |      |      |      |      | Section 88 |
|                        | (8440) | 8440                                               | 8450 | 8460 | 8470 | 8480 | 8490 | 8500 | 8510 | 8520 | 8536 |            |
| Ad 12 X73487           | (8240) | CTAT--TGCGTGAAGTATTCCATGAGCCCGGGGACTAACCCACGGT---- |      |      |      |      |      |      |      |      |      |            |
| SARS-CoV-2 NC_045512.2 | (4464) | CAACTATAC-AGCGTAAATATAAGGTATTAAAAATACAGAGGGTGTGGT  |      |      |      |      |      |      |      |      |      |            |
|                        |        |                                                    |      |      |      |      |      |      |      |      |      | Section 89 |
|                        | (8537) | 8537                                               | 8550 | 8560 | 8570 | 8580 | 8590 | 8600 | 8610 | 8620 | 8633 |            |
| Ad 12 X73487           | (8323) | GCGCGGACGAGCTCCGGAGGAAAGCGGGGTTCGGTCC-TGCGGAGCGGG  |      |      |      |      |      |      |      |      |      |            |
| SARS-CoV-2 NC_045512.2 | (4558) | AGCGTCACTTATCAACACACTTAAAGATCTAAATGAAAGTC-TTGTTACA |      |      |      |      |      |      |      |      |      |            |
|                        |        |                                                    |      |      |      |      |      |      |      |      |      | Section 90 |
|                        | (8634) | 8634                                               | 8640 | 8650 | 8660 | 8670 | 8680 | 8690 | 8700 | 8710 | 8720 | 8730       |
| Ad 12 X73487           | (8417) | TGAGCCCGAAGTTGACTGGCATGG-GCGACTACCGGCGGATT--GATAT  |      |      |      |      |      |      |      |      |      |            |
| SARS-CoV-2 NC_045512.2 | (4653) | CTC-GGTATATGAGATCTCTCAAGTGCAGCTACAGTTTCTGTTTCTTCA  |      |      |      |      |      |      |      |      |      |            |
|                        |        |                                                    |      |      |      |      |      |      |      |      |      | Section 91 |
|                        | (8731) | 8731                                               | 8740 | 8750 | 8760 | 8770 | 8780 | 8790 | 8800 | 8810 | 8827 |            |
| Ad 12 X73487           | (8510) | GAA-CCTGA-AAGAAAGTTCAACA GAATCTCA GTGTCATTTACTG    |      |      |      |      |      |      |      |      |      |            |
| SARS-CoV-2 NC_045512.2 | (4748) | AAAACACCTGAAGAACA TTTATTGAAACCATCTCA C-----TTG     |      |      |      |      |      |      |      |      |      |            |

SARS-CoV-2 & Ad12.apr

|                        |        |                                                                                                        |      |      |      |      |      |      |      |      |      |      |      |
|------------------------|--------|--------------------------------------------------------------------------------------------------------|------|------|------|------|------|------|------|------|------|------|------|
|                        |        | Section 92                                                                                             |      |      |      |      |      |      |      |      |      |      |      |
|                        |        | (8828)                                                                                                 | 8828 | 8840 | 8850 | 8860 | 8870 | 8880 | 8890 | 8900 | 8910 | 8924 |      |
| Ad 12 X73487           | (8602) | AGGC AATTTCTGCCATTAAATGATCAAATTTCTTTCCCTCTGG-AGGTCCTCATGTCCCGC--ACGTTCAAT-AGTGGCTGCAAGGTCATTAGATATC    |      |      |      |      |      |      |      |      |      |      |      |
| SARS-CoV-2 NC_045512.2 | (4838) | ATAG AATTTCTTAAGAGAGGGTGATAAAGTGTATATTTACACTAG---TAATCCTACCACATTCCACCTAGATGGTGAAGTTATCACTTTGACATC      |      |      |      |      |      |      |      |      |      |      |      |
|                        |        | Section 93                                                                                             |      |      |      |      |      |      |      |      |      |      |      |
|                        |        | (8925)                                                                                                 | 8925 | 8930 | 8940 | 8950 | 8960 | 8970 | 8980 | 8990 | 9000 | 9010 | 9021 |
| Ad 12 X73487           | (8694) | C---GACTCATTA-AGCTGTGAAAATGC---GTTTAGTCCAATTTCGTTCAGACTTCGGCTGTATACT-ACCCCTCCTTCGCTGTCCCCGAGCGCGCA     |      |      |      |      |      |      |      |      |      |      |      |
| SARS-CoV-2 NC_045512.2 | (4932) | TTAA GACACTTCTTTCTTGAAGAAGTGAGGAC TATTA-AGGTGTTTACAACAGTAGACAACATTAACCTCCAC-ACGCAAGTTGTG GACATGTCA     |      |      |      |      |      |      |      |      |      |      |      |
|                        |        | Section 94                                                                                             |      |      |      |      |      |      |      |      |      |      |      |
|                        |        | (9022)                                                                                                 | 9022 | 9030 | 9040 | 9050 | 9060 | 9070 | 9080 | 9090 | 9100 | 9118 |      |
| Ad 12 X73487           | (8782) | TAACCACTTGCGCCAAGTTGAGTTCG-ACGAGCCGTGC-GAACACGCCGTAGTTGCGCAAGC-GCTGA AACAGGTAGTTTAAGGTGGT-GGC AACGT    |      |      |      |      |      |      |      |      |      |      |      |
| SARS-CoV-2 NC_045512.2 | (5027) | ATGACATATGGA CAACAGTTTGGTCCAACTTATTTGGATGGAGCTGATGT TACTAAAATAAAACCTCA-----TAATTTACA-TGAAGGTAAACA      |      |      |      |      |      |      |      |      |      |      |      |
|                        |        | Section 95                                                                                             |      |      |      |      |      |      |      |      |      |      |      |
|                        |        | (9119)                                                                                                 | 9119 | 9130 | 9140 | 9150 | 9160 | 9170 | 9180 | 9190 | 9200 | 9215 |      |
| Ad 12 X73487           | (8875) | GT-TCTGAGACGAAGAA-ATACAGAA TCACGACGAAGCGT CAGCTCGT TGTGT CACCTAAGGCTTC-AAAGACGT-TCCATGGCTTCGT A-----   |      |      |      |      |      |      |      |      |      |      |      |
| SARS-CoV-2 NC_045512.2 | (5117) | TTTATGTTTTTACCTAA TGATGACACTCTACGT--GTTGAGGCTTTTGTAGTACTTAC CACACAACTGATCTCAGTTTTCTGGGTAGGTACATGTGCAGC |      |      |      |      |      |      |      |      |      |      |      |
|                        |        | Section 96                                                                                             |      |      |      |      |      |      |      |      |      |      |      |
|                        |        | (9216)                                                                                                 | 9216 | 9230 | 9240 | 9250 | 9260 | 9270 | 9280 | 9290 | 9300 | 9312 |      |
| Ad 12 X73487           | (8963) | ---AAA GTCTACTGCAAAATTGAAAAC TGGGA GTT GCGAGCTGCCACCGTCAATTCTTTCTTCCAA CAGACGAATAAGCTCGGCCACCGTCTCGCGC |      |      |      |      |      |      |      |      |      |      |      |
| SARS-CoV-2 NC_045512.2 | (5212) | ATTAAATCACACTAA AAA GTGAAATACCCACAAGTTAATGGTTTAACTT---CTATTAAATGGGCAGA----TAACAACTGTTATCTTGC CACTG     |      |      |      |      |      |      |      |      |      |      |      |
|                        |        | Section 97                                                                                             |      |      |      |      |      |      |      |      |      |      |      |
|                        |        | (9313)                                                                                                 | 9313 | 9320 | 9330 | 9340 | 9350 | 9360 | 9370 | 9380 | 9390 | 9409 |      |
| Ad 12 X73487           | (9057) | ACTTTC TTGCTGAAATGCGC CGGGA ACTATTTCTTG TTC TCC TCTCTA-----CTCCATTATTTCTTCTCGACCAAGGTGGTGGGGTTGT--     |      |      |      |      |      |      |      |      |      |      |      |
| SARS-CoV-2 NC_045512.2 | (5301) | CATTTGTT-----AACACTCCAAACAATAGAGTTGAAGT--TTAATCCACCTGCTCTACAAGATG-CTTATTACAGAGCAAGGGCTGGTGAAGCTGC      |      |      |      |      |      |      |      |      |      |      |      |
|                        |        | Section 98                                                                                             |      |      |      |      |      |      |      |      |      |      |      |
|                        |        | (9410)                                                                                                 | 9410 | 9420 | 9430 | 9440 | 9450 | 9460 | 9470 | 9480 | 9490 | 9506 |      |
| Ad 12 X73487           | (9147) | CTTCTTCGACGCCGCGAA CGGGCAGC-CTGTCTACA---AATCTTTC AATCATTT CGCCGCGACGCGGCGCATAGTTTCGGTTACTTGCTCGACCG    |      |      |      |      |      |      |      |      |      |      |      |
| SARS-CoV-2 NC_045512.2 | (5389) | TAACTTTTGTGC ACTTAT-CTTAGCCTACTGTAAATAAGACAGTAGGTGAGTTAGGTGAT-GTTAGAGAAA CAATGAGTTACTTGTT-TTCAACATGCC  |      |      |      |      |      |      |      |      |      |      |      |

SARS-CoV-2 & Ad12.apr

|                        |              |             |                     |            |          |         |         |          |        |        |          |         |            |       |            |            |       |       |       |       |       |       |       |     |        |    |       |     |     |     |    |    |
|------------------------|--------------|-------------|---------------------|------------|----------|---------|---------|----------|--------|--------|----------|---------|------------|-------|------------|------------|-------|-------|-------|-------|-------|-------|-------|-----|--------|----|-------|-----|-----|-----|----|----|
|                        |              | Section 99  |                     |            |          |         |         |          |        |        |          |         |            |       |            |            |       |       |       |       |       |       |       |     |        |    |       |     |     |     |    |    |
| SARS-CoV-2 NC_045512.2 | Ad 12 X73487 | (9507)      | 9507                | 9520       | 9530     | 9540    | 9550    | 9560     | 9570   | 9580   | 9590     | 9603    |            |       |            |            |       |       |       |       |       |       |       |     |        |    |       |     |     |     |    |    |
|                        |              | (9240)      | TTTTCACGTGGTTCGTAAC | CTCAAA     | ACTCCA   | CCTCTAA | GTTCTGT | TCATGT   | AAAATG | GGAATG | AGGC     | CTTGCG  | AGGGGCGTTA |       |            |            |       |       |       |       |       |       |       |     |        |    |       |     |     |     |    |    |
|                        |              | (5483)      | AAATTTAGATTCTTGCAA  | -----      | AAGAGT   | C--TG   | ACGTGT  | GTGT     | TAA    | CTTGT  | GGA      | CAC     | AGCAG      | GA--C | AACCCTTAAG | GGT        | GTA   | GAG   | CTG   |       |       |       |       |     |        |    |       |     |     |     |    |    |
|                        |              |             |                     |            |          |         |         |          |        |        |          |         |            |       |            |            |       |       |       |       |       |       |       |     |        |    |       |     |     |     |    |    |
|                        |              | Section 100 |                     |            |          |         |         |          |        |        |          |         |            |       |            |            |       |       |       |       |       |       |       |     |        |    |       |     |     |     |    |    |
| SARS-CoV-2 NC_045512.2 | Ad 12 X73487 | (9604)      | 9604                | 9610       | 9620     | 9630    | 9640    | 9650     | 9660   | 9670   | 9680     | 9690    | 9700       |       |            |            |       |       |       |       |       |       |       |     |        |    |       |     |     |     |    |    |
|                        |              | (9337)      | CGCTGATTTATG        | CATTT      | TATTATTT | GCTGCGT | AGGA    | ACTCCGC  | GC     | AAGG   | AG       | CTA     | AGCGTC     | TG    | CATAT      | TCCACCGGGT | TCG   | GAG   | A     | ----- | AC    | CTT   | T     |     |        |    |       |     |     |     |    |    |
|                        |              | (5568)      | TT---A              | TGTACAT    | GGGC     | ACAC    | TTTCT   | TATGA    | CA     | CA--T  | T        | TAAAGAA | AGGT       | GTT   | CAG        | A          | TACCT | TG    | TACG  | TGT   | GGTAA | ACAAG | GCT   | A   | CAAAAT | A  | CT    | AGT |     |     |    |    |
|                        |              |             |                     |            |          |         |         |          |        |        |          |         |            |       |            |            |       |       |       |       |       |       |       |     |        |    |       |     |     |     |    |    |
|                        |              | Section 101 |                     |            |          |         |         |          |        |        |          |         |            |       |            |            |       |       |       |       |       |       |       |     |        |    |       |     |     |     |    |    |
| SARS-CoV-2 NC_045512.2 | Ad 12 X73487 | (9701)      | 9701                | 9710       | 9720     | 9730    | 9740    | 9750     | 9760   | 9770   | 9780     | 9797    |            |       |            |            |       |       |       |       |       |       |       |     |        |    |       |     |     |     |    |    |
|                        |              | (9424)      | CAAGAAGGCATCTAGC    | --CAGT     | CACAGTCA | CAAGG   | TAGGCT  | AA       | GT     | TTTGT  | TTCTTCTA | AGTAC   | CAGGA      | AGC   | TG         | AGCA       | A     | TG    | CTACT | AAT   | AA    | T     | G     |     |        |    |       |     |     |     |    |    |
|                        |              | (5659)      | ACAACAGGAGTCA       | CCTTTTGTTA | TGATG    | TCAG    | CA      | CCACCT   | GCTC   | AGT    | ATGA     | AC      | TTAAG      | --CAT | G          | GTA        | CATTT | ACT   | TGT   | GCT   | AG    | TGAGT | TAC   | ACT | GGT    | T  |       |     |     |     |    |    |
|                        |              |             |                     |            |          |         |         |          |        |        |          |         |            |       |            |            |       |       |       |       |       |       |       |     |        |    |       |     |     |     |    |    |
|                        |              | Section 102 |                     |            |          |         |         |          |        |        |          |         |            |       |            |            |       |       |       |       |       |       |       |     |        |    |       |     |     |     |    |    |
| SARS-CoV-2 NC_045512.2 | Ad 12 X73487 | (9798)      | 9798                | 9810       | 9820     | 9830    | 9840    | 9850     | 9860   | 9870   | 9880     | 9894    |            |       |            |            |       |       |       |       |       |       |       |     |        |    |       |     |     |     |    |    |
|                        |              | (9516)      | TAAATTGAAG          | TAA        | GCTGTTT  | TAA     | AGCC    | CACGA    | ATGGT  | TTT    | TAA      | AG--    | AAGCACC    | A     | CAT        | CTT        | G     | GGTCC | GGC   | TTGT  | TGA   | ATT   | C     | G   | CAGG   | CG | GCTC  | TGC | CA  | TT  | C  |    |
|                        |              | (5753)      | -AAATTACCAG         | TGTG       | TCAC     | T-ATAAA | CATAT   | AACT     | CTTA   | AAGAA  | ACTTT    | TGT     | ATTG       | CAT   | AG         | ACGGT      | GCT   | TT    | TACT  | TTA   | CAAA  | G     | T     | CCT | CAG    | AA | TAC   | AA  | AGG |     |    |    |
|                        |              |             |                     |            |          |         |         |          |        |        |          |         |            |       |            |            |       |       |       |       |       |       |       |     |        |    |       |     |     |     |    |    |
|                        |              | Section 103 |                     |            |          |         |         |          |        |        |          |         |            |       |            |            |       |       |       |       |       |       |       |     |        |    |       |     |     |     |    |    |
| SARS-CoV-2 NC_045512.2 | Ad 12 X73487 | (9895)      | 9895                | 9900       | 9910     | 9920    | 9930    | 9940     | 9950   | 9960   | 9970     | 9980    | 9991       |       |            |            |       |       |       |       |       |       |       |     |        |    |       |     |     |     |    |    |
|                        |              | (9610)      | CACACGTCAC          | TTTGACAT   | CTGTC    | CAAGA   | TCTTT   | GTAGT    | AGTCT  | TG     | CAT      | T-AA    | ACC        | TTT   | CC         | ACT        | TCT   | ACCT  | C     | --GC  | GG    | ----  | TTT   | --- | CC     | G  | CA    | T   | C   |     |    |    |
|                        |              | (5848)      | TCCATATT            | --ACGGA    | TGTTTT   | TC      | TACA    | AAGA     | AAACA  | GT     | TAC      | CA      | ACA        | CAAC  | CAT        | AA         | AA    | CC    | AGT   | -T    | ACT   | TATA  | AA    | T   | GGAT   | G  | TGTTG | TTT | GTA | CAG | AA | AT |
|                        |              |             |                     |            |          |         |         |          |        |        |          |         |            |       |            |            |       |       |       |       |       |       |       |     |        |    |       |     |     |     |    |    |
|                        |              | Section 104 |                     |            |          |         |         |          |        |        |          |         |            |       |            |            |       |       |       |       |       |       |       |     |        |    |       |     |     |     |    |    |
| SARS-CoV-2 NC_045512.2 | Ad 12 X73487 | (9992)      | 9992                | 10000      | 10010    | 10020   | 10030   | 10040    | 10050  | 10060  | 10070    | 10088   |            |       |            |            |       |       |       |       |       |       |       |     |        |    |       |     |     |     |    |    |
|                        |              | (9695)      | AGCCAT              | TGTGCGT    | GCTTCCG  | TAGCC   | TTGCAG  | CGGTTG   | TATAA  | AGCT   | AAAT     | CTG     | GC         | A-CT  | ACC        | CG         | TTCCG | CAAG  | CAC   | TGCCT | GTTGA | ATT   | TGGGT | AA  |        |    |       |     |     |     |    |    |
|                        |              | (5942)      | GACCC               | TA----     | AGTTGGA  | --C     | AA      | TTATTATA | AAGAA  | AG     | CA       | ATTCT   | ATT        | TCAG  | AG         | CA         | ACC   | AA    | TTGAT | CTTGT | AC    | CAA   | ACCA  | ACC | AT     | AT | CC    | -AA | AA  |     |    |    |
|                        |              |             |                     |            |          |         |         |          |        |        |          |         |            |       |            |            |       |       |       |       |       |       |       |     |        |    |       |     |     |     |    |    |
|                        |              | Section 105 |                     |            |          |         |         |          |        |        |          |         |            |       |            |            |       |       |       |       |       |       |       |     |        |    |       |     |     |     |    |    |
| SARS-CoV-2 NC_045512.2 | Ad 12 X73487 | (10089)     | 10089               | 10100      | 10110    | 10120   | 10130   | 10140    | 10150  | 10160  | 10170    | 10185   |            |       |            |            |       |       |       |       |       |       |       |     |        |    |       |     |     |     |    |    |
|                        |              | (9790)      | GGGTG               | GTTGCA     | AAGTCAT  | CCACAT  | CTACAA  | AGCGGT   | GATAA  | -GCTCC | TGCAT    | TAA     | TGGTG      | --TAG | CTG        | CAGT       | TTGT  | CAT   | TACT  | GACC  | AA    | TTAA  | CA    |     |        |    |       |     |     |     |    |    |
|                        |              | (6031)      | CGCAAG              | GCTTCGA    | --TAAT   | TTTTA   | AGTTT   | TGTAT    | GTGA   | TATA   | TCAA     | ATT     | TGCTGAT    | TGAT  | T          | TAA        | ACC   | AGT   | TAA   | C--TG | GT    | AT    | A     | GA  | ----   | AA | C     | TG  | CT  | G   |    |    |

SARS-CoV-2 & Ad12.apr

[illegible]



SARS-CoV-2 & Ad12.apr

|                        |         |          |            |           |           |            |           |          |          |             |         |             |               |             |           |         |            |           |              |           |
|------------------------|---------|----------|------------|-----------|-----------|------------|-----------|----------|----------|-------------|---------|-------------|---------------|-------------|-----------|---------|------------|-----------|--------------|-----------|
|                        |         |          |            |           |           |            |           |          |          |             |         | Section 113 |               |             |           |         |            |           |              |           |
|                        | (10865) | 10865    | 10870      | 10880     | 10890     | 10900      | 10910     | 10920    | 10930    | 10940       | 10950   | 10961       |               |             |           |         |            |           |              |           |
| Ad 12 X73487           | (10452) | CGACC    | TCAGC      | -----     | -----     | CAGGGC     | AACC      | -----    | AGGCC    | TCAGCAG     | CGGTG   | ---GCGCTTT  | ---CGGGCTCTGG | CGAACAGGAA  |           |         |            |           |              |           |
| SARS-CoV-2 NC_045512.2 | (6730)  | -CATAG   | TTACA      | GGTGT     | TAAACCGT  | GTTTGTACTA | ATTATATGC | -CTTAT   | TTCTTTA  | CTTTATTGCTA | CAAT    | TGTGTACT    | TT-TA         | CTAGAAGTACA |           |         |            |           |              |           |
|                        |         |          |            |           |           |            |           |          |          |             |         | Section 114 |               |             |           |         |            |           |              |           |
|                        | (10962) | 10962    | 10970      | 10980     | 10990     | 11000      | 11010     | 11020    | 11030    | 11040       | 11058   |             |               |             |           |         |            |           |              |           |
| Ad 12 X73487           | (10518) | GAGCCT   | CAATG      | TCCT-ACAT | T---G     | GAGTTGG    | AAG--     | AAGGAG   | AAGGCA   | TAGCCCGA    | TTGG    | GCGCCC      | ACTCTCCTG     | AGCGTCA     | ACC       | CAAGGGT | TGCAG      |           |              |           |
| SARS-CoV-2 NC_045512.2 | (6824)  | AATTCT   | AGAA       | TAAAGCATC | TATGCC    | GACTACT    | ATAGC     | AAAAGA   | ATACTGT  | TAGAGTGT    | TCGG    | TA---A      | ATTTTGTCT     | AG----      | AGGCTTCAT | TTAAT   |            |           |              |           |
|                        |         |          |            |           |           |            |           |          |          |             |         | Section 115 |               |             |           |         |            |           |              |           |
|                        | (11059) | 11059    | 11070      | 11080     | 11090     | 11100      | 11110     | 11120    | 11130    | 11140       | 11155   |             |               |             |           |         |            |           |              |           |
| Ad 12 X73487           | (10608) | CTCGCCCG | GGACAG     | TCGCG     | TGGC      | ATTTG      | TGCCTCG   | TAGAAC   | ATGTT    | -TCGCG      | ACAA    | CAGC        | GGGGAG        | GA--        | AGCTG     | AGGA    | AAT--G     | CGAG      | ACTGCAG      |           |
| SARS-CoV-2 NC_045512.2 | (6914)  | TATTTGAA | GTCACC     | TAATT     | TTTCT     | TAAAC      | TGATAAA   | TATTA    | TAATTT   | TGGTTTT     | TTTACT  | ATTAAG      | TGTTT         | GCCT        | AGGT      | TCTTT   | AATCTA     | CTCA      | ACCGCTG      |           |
|                        |         |          |            |           |           |            |           |          |          |             |         | Section 116 |               |             |           |         |            |           |              |           |
|                        | (11156) | 11156    | 11170      | 11180     | 11190     | 11200      | 11210     | 11220    | 11230    | 11240       | 11252   |             |               |             |           |         |            |           |              |           |
| Ad 12 X73487           | (10700) | GTTTA    | ---GGGCCGG | TCGCG     | -AGCT     | TGCG       | CGCGGATT  | TAA      | TCGG     | GAGCG       | ACTG    | CTGCGT      | GAGG          | AGGACT      | TTGAGC    | CAG-AT  | GAA        | CATTCG    | --GGGAT      |           |
| SARS-CoV-2 NC_045512.2 | (7011)  | CTTTAGGT | GTTTTAA    | TGTCTA    | ATTAG     | GCATGC     | ---CTTCT  | TACTGT   | --ACTG   | GT          | TACA    | GAGAGG      | CTATTT        | TGAACT      | CTCT      | ACTAA   | TGTC       | CACTATT   | GCA          |           |
|                        |         |          |            |           |           |            |           |          |          |             |         | Section 117 |               |             |           |         |            |           |              |           |
|                        | (11253) | 11253    | 11260      | 11270     | 11280     | 11290      | 11300     | 11310    | 11320    | 11330       | 11349   |             |               |             |           |         |            |           |              |           |
| Ad 12 X73487           | (10790) | TAGTT    | CTGC       | ACGGG     | C-----    | CCAT       | TGTA      | TC---A   | G        | CAGC        | --CAAC  | TTAG        | TAA           | CAGC        | ATATGAAC  | AAAC    | GGTT       | TACAG     | AGGAACGTAACT | TT-CAAAA- |
| SARS-CoV-2 NC_045512.2 | (7103)  | ACC      | TACTGT     | ACTGG     | TTCTATA   | CC         | TGTA      | GTGTTT   | G        | TCTTAGTGGT  | TTAG    | ATT         | CTTT          | AGACACCT    | ATC       | CTTCTTT | AGAACTATAC | AAAT      | TTACATTT     |           |
|                        |         |          |            |           |           |            |           |          |          |             |         | Section 118 |               |             |           |         |            |           |              |           |
|                        | (11350) | 11350    | 11360      | 11370     | 11380     | 11390      | 11400     | 11410    | 11420    | 11430       | 11446   |             |               |             |           |         |            |           |              |           |
| Ad 12 X73487           | (10874) | AAGCTTT  | TAAT       | AACCATG   | TGCGCACAC | CTAAT      | AGC       | GCGAGAAG | A-AGT    | AGCCA       | TTGG    | TTTA        | -ATG          | CATCTTT     | TGGGAC    | TTTGTAG | AAGCTTA    | TGTACATA  |              |           |
| SARS-CoV-2 NC_045512.2 | (7200)  | CATCTTT  | T-AA       | TGGGA     | TTTAACTG  | CTTT       | TG        | GC       | TTAGTTGC | AGAGT       | GGTTT   | TTGG        | CATA          | ATTCTTT     | TCACTAGG  | TTTTT   | TCTAT      | G         | TACTTGAATTGG |           |
|                        |         |          |            |           |           |            |           |          |          |             |         | Section 119 |               |             |           |         |            |           |              |           |
|                        | (11447) | 11447    | 11460      | 11470     | 11480     | 11490      | 11500     | 11510    | 11520    | 11530       | 11543   |             |               |             |           |         |            |           |              |           |
| Ad 12 X73487           | (10969) | ATC      | CAGCAAG    | TAAAC     | CCCTAACT  | TGCC       | CAGCT     | GTTCT    | TAAT     | AGT         | TTCAACA | TAG         | TAG           | AGAC        | AAT       | GAAACTT | TTAG--     | GGATGCAAT | G-CTTAA      | CATAGC    |
| SARS-CoV-2 NC_045512.2 | (7296)  | CTG      | CA---      | ATCATG    | CAAT      | TGTT       | TTT       | CAGCT    | ATTT     | TGC--       | AGTACA  | TTT         | TAT           | TAGT--      | AAT       | TCTTGGC | TTATGT     | GGTT--    | AATAA        | TTAATCTTG |

# SARS-CoV-2 & Ad12.apr

|                        |         |       |       |                      |                      |         |         |        |        |       |             |            |         |        |        |       |       |       |       |       |        |           |               |        |         |     |          |      |         |       |         |       |      |      |   |     |      |    |    |     |    |    |    |   |
|------------------------|---------|-------|-------|----------------------|----------------------|---------|---------|--------|--------|-------|-------------|------------|---------|--------|--------|-------|-------|-------|-------|-------|--------|-----------|---------------|--------|---------|-----|----------|------|---------|-------|---------|-------|------|------|---|-----|------|----|----|-----|----|----|----|---|
|                        |         |       |       |                      |                      |         |         |        |        |       | Section 120 |            |         |        |        |       |       |       |       |       |        |           |               |        |         |     |          |      |         |       |         |       |      |      |   |     |      |    |    |     |    |    |    |   |
|                        | (11544) | 11544 | 11550 | 11560                | 11570                | 11580   | 11590   | 11600  | 11610  | 11620 | 11630       | 11640      |         |        |        |       |       |       |       |       |        |           |               |        |         |     |          |      |         |       |         |       |      |      |   |     |      |    |    |     |    |    |    |   |
| Ad 12 X73487           | (11063) | TG-AA | CCCC  | CAGG                 | GTCGGTGT             | TTACTC  | GATTT   | AATTA  | ACAT   | TCTG  | CAGAGCA     | TTGTGGTTCA | -GGAACG | CAGTCT | TTAGTT | TGGCA | GAC   | AAAG  | GTGG  | CCG   |        |           |               |        |         |     |          |      |         |       |         |       |      |      |   |     |      |    |    |     |    |    |    |   |
| SARS-CoV-2 NC_045512.2 | (7381)  | ACA   | AA    | TGG                  | CCCC                 | GATTTCA | GCT-AT  | GGTTAG | AATGT  | ACAT  | ----        | C-----     | TTCT-T  | TGCAT  | -----  | C-AT  | TTTAT | TATG  | TAT   | GGA   | AAAG   | GTAT      | TGT           |        |         |     |          |      |         |       |         |       |      |      |   |     |      |    |    |     |    |    |    |   |
|                        |         |       |       |                      |                      |         |         |        |        |       | Section 121 |            |         |        |        |       |       |       |       |       |        |           |               |        |         |     |          |      |         |       |         |       |      |      |   |     |      |    |    |     |    |    |    |   |
|                        | (11641) | 11641 | 11650 | 11660                | 11670                | 11680   | 11690   | 11700  | 11710  | 11720 | 11737       |            |         |        |        |       |       |       |       |       |        |           |               |        |         |     |          |      |         |       |         |       |      |      |   |     |      |    |    |     |    |    |    |   |
| Ad 12 X73487           | (11158) | C     | CAT   | TAAT                 | TACT                 | CCAT    | TGT     | TAA--  | GT     | TGGG  | AAA         | GT         | TT      | TATG   | CTCG   | TAA   | AA    | TCTAC | AA    | AGT   | CCGT   | ATG       | -T            | TCCC   | AT      | TG  | ACAA     | GG   | AA      | ----  | G       | TGAAG |      |      |   |     |      |    |    |     |    |    |    |   |
| SARS-CoV-2 NC_045512.2 | (7459)  | G     | CAT   | GTTG                 | TAGA                 | CGG     | TTG     | TAA    | TTCA   | TCAA  | -CTT        | GT         | AT      | GATG   | TGT-   | TACAA | AG    | GTAA  | TAGAG | CAAC  | AA     | GAG       | TC            | GA     | AT      | GT  | ACAA     | CT   | ATTG    | TAA   | TGGT    | G     |      |      |   |     |      |    |    |     |    |    |    |   |
|                        |         |       |       |                      |                      |         |         |        |        |       | Section 122 |            |         |        |        |       |       |       |       |       |        |           |               |        |         |     |          |      |         |       |         |       |      |      |   |     |      |    |    |     |    |    |    |   |
|                        | (11738) | 11738 | 11750 | 11760                | 11770                | 11780   | 11790   | 11800  | 11810  | 11820 | 11834       |            |         |        |        |       |       |       |       |       |        |           |               |        |         |     |          |      |         |       |         |       |      |      |   |     |      |    |    |     |    |    |    |   |
| Ad 12 X73487           | (11247) | A     | TAGA  | --CAG                | CTTTTA               | ----    | TATGC   | GC     | ATGG   | CTT   | TAA         | ----       | AGG     | TAC    | TAA    | CAT   | TAAG  | CG    | AC    | GATCT | TG     | GA        | GT            | GT     | ACC     | GCA | ATG      | -    | ACCGAAT | C     | CACAA   |       |      |      |   |     |      |    |    |     |    |    |    |   |
| SARS-CoV-2 NC_045512.2 | (7554)  | T     | TAGA  | AGGTC                | CTTTTA               | TGTC    | TATGC   | TA     | ATGG   | AGG   | TAA         | AGGC       | TTT     | TG     | CA     | AA    | C--   | TACA  | CA    | ATTG  | GAA    | TT        | GT            | GT     | TAA     | ATT | GT       | GAT  | AC      | ATTCT | GT      | CTGGT |      |      |   |     |      |    |    |     |    |    |    |   |
|                        |         |       |       |                      |                      |         |         |        |        |       | Section 123 |            |         |        |        |       |       |       |       |       |        |           |               |        |         |     |          |      |         |       |         |       |      |      |   |     |      |    |    |     |    |    |    |   |
|                        | (11835) | 11835 | 11840 | 11850                | 11860                | 11870   | 11880   | 11890  | 11900  | 11910 | 11920       | 11931      |         |        |        |       |       |       |       |       |        |           |               |        |         |     |          |      |         |       |         |       |      |      |   |     |      |    |    |     |    |    |    |   |
| Ad 12 X73487           | (11333) | AG    | C     | AGTAAGCGCCAGTCGCCGCA | -GAG                 | GAG     | CTA     | AGC    | GACA   | AAGAG | CTTA        | TGCA       | TAG     | CTT    | ACAAA  | GGGCG | CTG   | AC    | GG    | GAG   | CAG    | -GA       | -ACAGAGGACGAG |        |         |     |          |      |         |       |         |       |      |      |   |     |      |    |    |     |    |    |    |   |
| SARS-CoV-2 NC_045512.2 | (7649)  | AG    | T     | A                    | CATTTATTAGTGATGAAGTT | GC      | GAG     | AGA    | CTT    | GT    | CA          | CTA        | --      | CAGT   | T---   | TA    | AAAG  | AC    | CAA   | TAAAT | C      | T         | ACT           | GA     | -C      | CAG | TCTTCT   | ---- | TACA    |       |         |       |      |      |   |     |      |    |    |     |    |    |    |   |
|                        |         |       |       |                      |                      |         |         |        |        |       | Section 124 |            |         |        |        |       |       |       |       |       |        |           |               |        |         |     |          |      |         |       |         |       |      |      |   |     |      |    |    |     |    |    |    |   |
|                        | (11932) | 11932 | 11940 | 11950                | 11960                | 11970   | 11980   | 11990  | 12000  | 12010 | 12028       |            |         |        |        |       |       |       |       |       |        |           |               |        |         |     |          |      |         |       |         |       |      |      |   |     |      |    |    |     |    |    |    |   |
| Ad 12 X73487           | (11427) | TCGTT | CT    | TGAT                 | TATGGG               | C       | GCA     | GACCT  | A      | GGT   | GGCAGC      | C          | AG      | G      | GC     | TC    | GCGCT | TT    | G     | AGGC  | AGCTGG | AGTGGC    | GT            | CT     | GC      | TGA | CG       | -T   | CAC     | T     | GG      | CGAT  | GAC  |      |   |     |      |    |    |     |    |    |    |   |
| SARS-CoV-2 NC_045512.2 | (7734)  | TCGTT | GAT   | -AG                  | T-GTTA               | C       | AGT     | GA     | AGA    | AT    | GGT         | ----       | T       | CAT    | C      | CA    | TC    | TTTAC | TT    | T     | GA     | TAA       | AGCTGG        | TCAAAA | G       | ACT | TA       | TGA  | AAGA    | CAT   | T       | CT    | C    | TCTC |   |     |      |    |    |     |    |    |    |   |
|                        |         |       |       |                      |                      |         |         |        |        |       | Section 125 |            |         |        |        |       |       |       |       |       |        |           |               |        |         |     |          |      |         |       |         |       |      |      |   |     |      |    |    |     |    |    |    |   |
|                        | (12029) | 12029 | 12040 | 12050                | 12060                | 12070   | 12080   | 12090  | 12100  | 12110 | 12125       |            |         |        |        |       |       |       |       |       |        |           |               |        |         |     |          |      |         |       |         |       |      |      |   |     |      |    |    |     |    |    |    |   |
| Ad 12 X73487           | (11523) | GAT   | T     | GACGA                | AG                   | AC      | CAG     | TAC    | GAGGA  | CTGA  | TC          | G          | CCGT    | T--    | AC     | CT    | TTT   | GT    | TAG   | AT    | GCA    | GC        | GACCGGCGA     | T      | CAT     | C-- | GCGGAGAG | GG   | GCTCCT  | A     | A       | CT    | ---- |      |   |     |      |    |    |     |    |    |    |   |
| SARS-CoV-2 NC_045512.2 | (7824)  | AT    | T     | TTGTTA               | A-                   | AC      | --T     | TA     | GACAAC | CTGA  | GAG         | CTAA       | T       | AACA   | CT     | AAA   | GT    | TC    | AT    | --T   | GC     | CTATTAATG | T             | TAT    | AGTTTTT | GAT | GGTA     | ---  | AAT     | C     | AAAATGT |       |      |      |   |     |      |    |    |     |    |    |    |   |
|                        |         |       |       |                      |                      |         |         |        |        |       | Section 126 |            |         |        |        |       |       |       |       |       |        |           |               |        |         |     |          |      |         |       |         |       |      |      |   |     |      |    |    |     |    |    |    |   |
|                        | (12126) | 12126 | 12140 | 12150                | 12160                | 12170   | 12180   | 12190  | 12200  | 12210 | 12222       |            |         |        |        |       |       |       |       |       |        |           |               |        |         |     |          |      |         |       |         |       |      |      |   |     |      |    |    |     |    |    |    |   |
| Ad 12 X73487           | (11611) | ----- | G     | A                    | TCCC                 | GC      | G       | GT     | TT     | TG    | GCGG        | C          | CA      | T      | G      | CA    | AAGC  | CAGC  | CT    | C     | TG     | GCGTT     | AC            | AGC    | T       | T   | CAG      | T    | GACT    | G     | GA      | CAGC  | GGC  | CAT  | T | G   | GATC | GT | AT |     |    |    |    |   |
| SARS-CoV-2 NC_045512.2 | (7913)  | GA    | A     | AATCATCT             | G                    | C       | AAAATCA | G      | C      | G     | T           | C          | T       | G      | T      | TAC   | AGT   | --    | T     | CA    | G      | T--       | CAGC          | -TT    | AT      | TG  | TG       | CA   | AC      | CT    | A       | T     | ACT  | G    | A | TCA | -GGC | AT | T  | AGT | -- | GT | CT | G |

SARS-CoV-2 & Ad12.apr

|                        |         |       |       |       |       |       |        |       |         |          |         |             |       |      |      |     |          |         |     |        |       |        |       |          |      |          |         |        |         |         |         |       |      |       |     |    |      |       |    |     |   |   |   |   |   |   |   |   |   |   |   |   |   |   |   |   |   |   |   |   |   |   |   |   |   |   |   |   |   |   |   |   |   |   |   |   |   |   |   |   |   |   |   |   |   |   |   |   |   |   |   |   |   |   |   |   |   |   |   |   |   |   |   |   |   |   |   |   |   |   |   |   |   |   |   |   |   |   |   |   |   |   |   |   |   |   |   |   |   |   |   |   |   |   |   |   |   |   |   |   |   |   |   |   |   |   |   |   |   |   |   |   |   |   |   |   |   |   |   |   |   |   |   |   |   |   |   |   |   |   |   |   |   |   |   |   |   |   |   |   |   |   |   |   |   |   |   |   |   |   |   |   |   |   |   |   |   |   |   |   |   |   |   |   |   |   |   |   |   |   |   |   |   |   |   |   |   |   |   |   |   |   |   |   |   |   |   |   |   |   |   |   |   |   |   |   |   |   |   |   |   |   |   |   |   |   |   |   |   |   |   |   |   |   |   |   |   |   |   |   |   |   |   |   |   |   |   |   |   |   |   |   |   |   |   |   |   |   |   |   |   |   |   |   |   |   |   |   |   |   |   |   |   |   |   |   |   |   |   |   |   |   |   |   |   |   |   |   |   |   |   |   |   |   |   |   |   |   |   |   |   |   |   |   |   |   |   |   |   |   |   |   |   |   |   |   |   |   |   |   |   |   |   |   |   |   |   |   |   |   |   |   |   |   |   |   |   |   |   |   |   |   |   |   |   |   |   |   |   |   |   |   |   |   |   |   |   |   |   |   |   |   |   |   |   |   |   |   |   |   |   |   |   |   |   |   |   |   |   |   |   |   |   |   |   |   |   |   |   |   |   |   |   |   |   |   |   |   |   |   |   |   |   |   |   |   |   |   |   |   |   |   |   |   |   |   |   |   |   |   |   |   |   |   |   |   |   |   |   |   |   |   |   |   |   |   |   |   |   |   |   |   |   |   |   |   |   |   |   |   |   |   |   |   |   |   |   |   |   |   |   |   |   |   |   |   |   |   |   |   |   |   |   |   |   |   |   |   |   |   |   |   |   |   |   |   |   |   |   |   |   |   |   |   |   |   |   |   |   |   |   |   |   |   |   |   |   |   |   |   |   |   |   |   |   |   |   |   |   |   |   |   |   |   |   |   |   |   |   |   |   |   |   |   |   |   |   |   |   |   |   |   |   |   |   |   |   |   |   |   |   |   |   |   |   |   |   |   |   |   |   |   |   |   |   |   |   |   |   |   |   |   |   |   |   |   |   |   |   |   |   |   |   |   |   |   |   |   |   |   |   |   |   |   |   |   |   |   |   |   |   |   |   |   |   |   |   |   |   |   |   |   |   |   |   |   |   |   |   |   |   |   |   |   |   |   |   |   |   |   |   |   |   |   |   |   |   |   |   |   |   |   |   |   |   |   |   |   |   |   |   |   |   |   |   |   |   |   |   |   |   |   |   |   |   |   |   |   |   |   |   |   |   |   |   |   |   |   |   |   |   |   |   |   |   |   |   |   |   |   |   |   |   |   |   |   |   |   |   |   |   |   |   |   |   |   |   |   |   |   |   |   |   |   |   |   |   |   |   |   |   |   |   |   |   |   |   |   |   |   |   |   |   |   |   |   |   |   |   |   |   |   |   |   |   |   |   |   |   |   |   |   |   |   |   |   |   |   |   |   |   |   |   |   |   |   |   |   |   |   |   |   |   |   |   |   |   |   |   |   |   |   |   |   |   |   |   |   |   |   |   |   |   |   |   |   |   |   |   |   |   |   |   |   |   |   |   |   |   |   |   |   |   |   |   |   |   |   |   |   |   |   |   |   |   |   |   |   |   |   |   |   |   |   |   |   |   |   |   |   |   |   |   |   |   |   |   |   |   |   |   |   |   |   |   |   |   |   |   |   |   |   |   |   |   |   |   |   |   |   |   |   |   |   |   |   |   |   |   |   |   |   |   |   |   |   |   |   |   |   |   |   |   |   |   |   |   |   |   |   |   |   |   |   |   |   |   |   |   |   |   |   |   |   |   |   |   |   |   |   |   |   |   |   |   |   |   |   |   |   |   |   |   |   |   |
|------------------------|---------|-------|-------|-------|-------|-------|--------|-------|---------|----------|---------|-------------|-------|------|------|-----|----------|---------|-----|--------|-------|--------|-------|----------|------|----------|---------|--------|---------|---------|---------|-------|------|-------|-----|----|------|-------|----|-----|---|---|---|---|---|---|---|---|---|---|---|---|---|---|---|---|---|---|---|---|---|---|---|---|---|---|---|---|---|---|---|---|---|---|---|---|---|---|---|---|---|---|---|---|---|---|---|---|---|---|---|---|---|---|---|---|---|---|---|---|---|---|---|---|---|---|---|---|---|---|---|---|---|---|---|---|---|---|---|---|---|---|---|---|---|---|---|---|---|---|---|---|---|---|---|---|---|---|---|---|---|---|---|---|---|---|---|---|---|---|---|---|---|---|---|---|---|---|---|---|---|---|---|---|---|---|---|---|---|---|---|---|---|---|---|---|---|---|---|---|---|---|---|---|---|---|---|---|---|---|---|---|---|---|---|---|---|---|---|---|---|---|---|---|---|---|---|---|---|---|---|---|---|---|---|---|---|---|---|---|---|---|---|---|---|---|---|---|---|---|---|---|---|---|---|---|---|---|---|---|---|---|---|---|---|---|---|---|---|---|---|---|---|---|---|---|---|---|---|---|---|---|---|---|---|---|---|---|---|---|---|---|---|---|---|---|---|---|---|---|---|---|---|---|---|---|---|---|---|---|---|---|---|---|---|---|---|---|---|---|---|---|---|---|---|---|---|---|---|---|---|---|---|---|---|---|---|---|---|---|---|---|---|---|---|---|---|---|---|---|---|---|---|---|---|---|---|---|---|---|---|---|---|---|---|---|---|---|---|---|---|---|---|---|---|---|---|---|---|---|---|---|---|---|---|---|---|---|---|---|---|---|---|---|---|---|---|---|---|---|---|---|---|---|---|---|---|---|---|---|---|---|---|---|---|---|---|---|---|---|---|---|---|---|---|---|---|---|---|---|---|---|---|---|---|---|---|---|---|---|---|---|---|---|---|---|---|---|---|---|---|---|---|---|---|---|---|---|---|---|---|---|---|---|---|---|---|---|---|---|---|---|---|---|---|---|---|---|---|---|---|---|---|---|---|---|---|---|---|---|---|---|---|---|---|---|---|---|---|---|---|---|---|---|---|---|---|---|---|---|---|---|---|---|---|---|---|---|---|---|---|---|---|---|---|---|---|---|---|---|---|---|---|---|---|---|---|---|---|---|---|---|---|---|---|---|---|---|---|---|---|---|---|---|---|---|---|---|---|---|---|---|---|---|---|---|---|---|---|---|---|---|---|---|---|---|---|---|---|---|---|---|---|---|---|---|---|---|---|---|---|---|---|---|---|---|---|---|---|---|---|---|---|---|---|---|---|---|---|---|---|---|---|---|---|---|---|---|---|---|---|---|---|---|---|---|---|---|---|---|---|---|---|---|---|---|---|---|---|---|---|---|---|---|---|---|---|---|---|---|---|---|---|---|---|---|---|---|---|---|---|---|---|---|---|---|---|---|---|---|---|---|---|---|---|---|---|---|---|---|---|---|---|---|---|---|---|---|---|---|---|---|---|---|---|---|---|---|---|---|---|---|---|---|---|---|---|---|---|---|---|---|---|---|---|---|---|---|---|---|---|---|---|---|---|---|---|---|---|---|---|---|---|---|---|---|---|---|---|---|---|---|---|---|---|---|---|---|---|---|---|---|---|---|---|---|---|---|---|---|---|---|---|---|---|---|---|---|---|---|---|---|---|---|---|---|---|---|---|---|---|---|---|---|---|---|---|---|---|---|---|---|---|---|---|---|---|---|---|---|---|---|---|---|---|---|---|---|---|---|---|---|---|---|---|---|---|---|---|---|---|---|---|---|---|---|---|---|---|---|---|---|---|---|---|---|---|---|---|---|---|---|---|---|---|---|---|---|---|---|---|---|---|---|---|---|---|---|---|---|---|---|---|---|---|---|---|---|---|---|---|---|---|---|---|---|---|---|---|---|---|---|---|---|---|---|---|---|---|---|---|---|---|---|---|---|---|---|---|---|---|---|---|---|---|---|---|---|---|---|---|---|---|---|---|---|---|---|---|---|---|---|---|---|---|---|---|---|---|---|---|---|---|---|---|---|---|---|---|---|---|---|---|---|---|---|---|---|---|---|---|---|---|---|---|---|---|---|---|---|---|---|---|---|---|---|---|---|---|---|---|---|---|---|---|
|                        |         |       |       |       |       |       |        |       |         |          |         | Section 127 |       |      |      |     |          |         |     |        |       |        |       |          |      |          |         |        |         |         |         |       |      |       |     |    |      |       |    |     |   |   |   |   |   |   |   |   |   |   |   |   |   |   |   |   |   |   |   |   |   |   |   |   |   |   |   |   |   |   |   |   |   |   |   |   |   |   |   |   |   |   |   |   |   |   |   |   |   |   |   |   |   |   |   |   |   |   |   |   |   |   |   |   |   |   |   |   |   |   |   |   |   |   |   |   |   |   |   |   |   |   |   |   |   |   |   |   |   |   |   |   |   |   |   |   |   |   |   |   |   |   |   |   |   |   |   |   |   |   |   |   |   |   |   |   |   |   |   |   |   |   |   |   |   |   |   |   |   |   |   |   |   |   |   |   |   |   |   |   |   |   |   |   |   |   |   |   |   |   |   |   |   |   |   |   |   |   |   |   |   |   |   |   |   |   |   |   |   |   |   |   |   |   |   |   |   |   |   |   |   |   |   |   |   |   |   |   |   |   |   |   |   |   |   |   |   |   |   |   |   |   |   |   |   |   |   |   |   |   |   |   |   |   |   |   |   |   |   |   |   |   |   |   |   |   |   |   |   |   |   |   |   |   |   |   |   |   |   |   |   |   |   |   |   |   |   |   |   |   |   |   |   |   |   |   |   |   |   |   |   |   |   |   |   |   |   |   |   |   |   |   |   |   |   |   |   |   |   |   |   |   |   |   |   |   |   |   |   |   |   |   |   |   |   |   |   |   |   |   |   |   |   |   |   |   |   |   |   |   |   |   |   |   |   |   |   |   |   |   |   |   |   |   |   |   |   |   |   |   |   |   |   |   |   |   |   |   |   |   |   |   |   |   |   |   |   |   |   |   |   |   |   |   |   |   |   |   |   |   |   |   |   |   |   |   |   |   |   |   |   |   |   |   |   |   |   |   |   |   |   |   |   |   |   |   |   |   |   |   |   |   |   |   |   |   |   |   |   |   |   |   |   |   |   |   |   |   |   |   |   |   |   |   |   |   |   |   |   |   |   |   |   |   |   |   |   |   |   |   |   |   |   |   |   |   |   |   |   |   |   |   |   |   |   |   |   |   |   |   |   |   |   |   |   |   |   |   |   |   |   |   |   |   |   |   |   |   |   |   |   |   |   |   |   |   |   |   |   |   |   |   |   |   |   |   |   |   |   |   |   |   |   |   |   |   |   |   |   |   |   |   |   |   |   |   |   |   |   |   |   |   |   |   |   |   |   |   |   |   |   |   |   |   |   |   |   |   |   |   |   |   |   |   |   |   |   |   |   |   |   |   |   |   |   |   |   |   |   |   |   |   |   |   |   |   |   |   |   |   |   |   |   |   |   |   |   |   |   |   |   |   |   |   |   |   |   |   |   |   |   |   |   |   |   |   |   |   |   |   |   |   |   |   |   |   |   |   |   |   |   |   |   |   |   |   |   |   |   |   |   |   |   |   |   |   |   |   |   |   |   |   |   |   |   |   |   |   |   |   |   |   |   |   |   |   |   |   |   |   |   |   |   |   |   |   |   |   |   |   |   |   |   |   |   |   |   |   |   |   |   |   |   |   |   |   |   |   |   |   |   |   |   |   |   |   |   |   |   |   |   |   |   |   |   |   |   |   |   |   |   |   |   |   |   |   |   |   |   |   |   |   |   |   |   |   |   |   |   |   |   |   |   |   |   |   |   |   |   |   |   |   |   |   |   |   |   |   |   |   |   |   |   |   |   |   |   |   |   |   |   |   |   |   |   |   |   |   |   |   |   |   |   |   |   |   |   |   |   |   |   |   |   |   |   |   |   |   |   |   |   |   |   |   |   |   |   |   |   |   |   |   |   |   |   |   |   |   |   |   |   |   |   |   |   |   |   |   |   |   |   |   |   |   |   |   |   |   |   |   |   |   |   |   |   |   |   |   |   |   |   |   |   |   |   |   |   |   |   |   |   |   |   |   |   |   |   |   |   |   |   |   |   |   |   |   |   |   |   |   |   |   |   |   |   |   |   |   |   |   |   |   |   |   |   |   |   |   |   |   |   |   |   |   |   |   |   |   |   |   |   |   |   |   |   |   |   |   |   |   |   |   |   |   |   |   |   |   |   |   |   |   |   |   |   |   |   |   |   |   |   |   |   |   |   |
|                        | (12223) | 12223 | 12230 | 12240 | 12250 | 12260 | 12270  | 12280 | 12290   | 12300    | 12319   |             |       |      |      |     |          |         |     |        |       |        |       |          |      |          |         |        |         |         |         |       |      |       |     |    |      |       |    |     |   |   |   |   |   |   |   |   |   |   |   |   |   |   |   |   |   |   |   |   |   |   |   |   |   |   |   |   |   |   |   |   |   |   |   |   |   |   |   |   |   |   |   |   |   |   |   |   |   |   |   |   |   |   |   |   |   |   |   |   |   |   |   |   |   |   |   |   |   |   |   |   |   |   |   |   |   |   |   |   |   |   |   |   |   |   |   |   |   |   |   |   |   |   |   |   |   |   |   |   |   |   |   |   |   |   |   |   |   |   |   |   |   |   |   |   |   |   |   |   |   |   |   |   |   |   |   |   |   |   |   |   |   |   |   |   |   |   |   |   |   |   |   |   |   |   |   |   |   |   |   |   |   |   |   |   |   |   |   |   |   |   |   |   |   |   |   |   |   |   |   |   |   |   |   |   |   |   |   |   |   |   |   |   |   |   |   |   |   |   |   |   |   |   |   |   |   |   |   |   |   |   |   |   |   |   |   |   |   |   |   |   |   |   |   |   |   |   |   |   |   |   |   |   |   |   |   |   |   |   |   |   |   |   |   |   |   |   |   |   |   |   |   |   |   |   |   |   |   |   |   |   |   |   |   |   |   |   |   |   |   |   |   |   |   |   |   |   |   |   |   |   |   |   |   |   |   |   |   |   |   |   |   |   |   |   |   |   |   |   |   |   |   |   |   |   |   |   |   |   |   |   |   |   |   |   |   |   |   |   |   |   |   |   |   |   |   |   |   |   |   |   |   |   |   |   |   |   |   |   |   |   |   |   |   |   |   |   |   |   |   |   |   |   |   |   |   |   |   |   |   |   |   |   |   |   |   |   |   |   |   |   |   |   |   |   |   |   |   |   |   |   |   |   |   |   |   |   |   |   |   |   |   |   |   |   |   |   |   |   |   |   |   |   |   |   |   |   |   |   |   |   |   |   |   |   |   |   |   |   |   |   |   |   |   |   |   |   |   |   |   |   |   |   |   |   |   |   |   |   |   |   |   |   |   |   |   |   |   |   |   |   |   |   |   |   |   |   |   |   |   |   |   |   |   |   |   |   |   |   |   |   |   |   |   |   |   |   |   |   |   |   |   |   |   |   |   |   |   |   |   |   |   |   |   |   |   |   |   |   |   |   |   |   |   |   |   |   |   |   |   |   |   |   |   |   |   |   |   |   |   |   |   |   |   |   |   |   |   |   |   |   |   |   |   |   |   |   |   |   |   |   |   |   |   |   |   |   |   |   |   |   |   |   |   |   |   |   |   |   |   |   |   |   |   |   |   |   |   |   |   |   |   |   |   |   |   |   |   |   |   |   |   |   |   |   |   |   |   |   |   |   |   |   |   |   |   |   |   |   |   |   |   |   |   |   |   |   |   |   |   |   |   |   |   |   |   |   |   |   |   |   |   |   |   |   |   |   |   |   |   |   |   |   |   |   |   |   |   |   |   |   |   |   |   |   |   |   |   |   |   |   |   |   |   |   |   |   |   |   |   |   |   |   |   |   |   |   |   |   |   |   |   |   |   |   |   |   |   |   |   |   |   |   |   |   |   |   |   |   |   |   |   |   |   |   |   |   |   |   |   |   |   |   |   |   |   |   |   |   |   |   |   |   |   |   |   |   |   |   |   |   |   |   |   |   |   |   |   |   |   |   |   |   |   |   |   |   |   |   |   |   |   |   |   |   |   |   |   |   |   |   |   |   |   |   |   |   |   |   |   |   |   |   |   |   |   |   |   |   |   |   |   |   |   |   |   |   |   |   |   |   |   |   |   |   |   |   |   |   |   |   |   |   |   |   |   |   |   |   |   |   |   |   |   |   |   |   |   |   |   |   |   |   |   |   |   |   |   |   |   |   |   |   |   |   |   |   |   |   |   |   |   |   |   |   |   |   |   |   |   |   |   |   |   |   |   |   |   |   |   |   |   |   |   |   |   |   |   |   |   |   |   |   |   |   |   |   |   |   |   |   |   |   |   |   |   |   |   |   |   |   |   |   |   |   |   |   |   |   |   |   |   |   |   |   |   |   |   |   |   |   |   |   |   |   |   |   |   |   |   |   |   |   |   |   |   |   |   |   |   |   |   |   |   |
| Ad 12 X73487           | (11696) | ATG   | GCTT  | TAA   | CGG   | C     | GC     | -G    | CAGT    | CCT      | GAT     | GCT         | -TTTC | CCAG | CAG  | C   | CCCAAGCT | AAC     | CGC | TTT    | TCGGC | CAT    | TT    | -TGGAAGC | AGT  | AGTGC    | CGTC    | TC     | GTA     |         |         |       |      |       |     |    |      |       |    |     |   |   |   |   |   |   |   |   |   |   |   |   |   |   |   |   |   |   |   |   |   |   |   |   |   |   |   |   |   |   |   |   |   |   |   |   |   |   |   |   |   |   |   |   |   |   |   |   |   |   |   |   |   |   |   |   |   |   |   |   |   |   |   |   |   |   |   |   |   |   |   |   |   |   |   |   |   |   |   |   |   |   |   |   |   |   |   |   |   |   |   |   |   |   |   |   |   |   |   |   |   |   |   |   |   |   |   |   |   |   |   |   |   |   |   |   |   |   |   |   |   |   |   |   |   |   |   |   |   |   |   |   |   |   |   |   |   |   |   |   |   |   |   |   |   |   |   |   |   |   |   |   |   |   |   |   |   |   |   |   |   |   |   |   |   |   |   |   |   |   |   |   |   |   |   |   |   |   |   |   |   |   |   |   |   |   |   |   |   |   |   |   |   |   |   |   |   |   |   |   |   |   |   |   |   |   |   |   |   |   |   |   |   |   |   |   |   |   |   |   |   |   |   |   |   |   |   |   |   |   |   |   |   |   |   |   |   |   |   |   |   |   |   |   |   |   |   |   |   |   |   |   |   |   |   |   |   |   |   |   |   |   |   |   |   |   |   |   |   |   |   |   |   |   |   |   |   |   |   |   |   |   |   |   |   |   |   |   |   |   |   |   |   |   |   |   |   |   |   |   |   |   |   |   |   |   |   |   |   |   |   |   |   |   |   |   |   |   |   |   |   |   |   |   |   |   |   |   |   |   |   |   |   |   |   |   |   |   |   |   |   |   |   |   |   |   |   |   |   |   |   |   |   |   |   |   |   |   |   |   |   |   |   |   |   |   |   |   |   |   |   |   |   |   |   |   |   |   |   |   |   |   |   |   |   |   |   |   |   |   |   |   |   |   |   |   |   |   |   |   |   |   |   |   |   |   |   |   |   |   |   |   |   |   |   |   |   |   |   |   |   |   |   |   |   |   |   |   |   |   |   |   |   |   |   |   |   |   |   |   |   |   |   |   |   |   |   |   |   |   |   |   |   |   |   |   |   |   |   |   |   |   |   |   |   |   |   |   |   |   |   |   |   |   |   |   |   |   |   |   |   |   |   |   |   |   |   |   |   |   |   |   |   |   |   |   |   |   |   |   |   |   |   |   |   |   |   |   |   |   |   |   |   |   |   |   |   |   |   |   |   |   |   |   |   |   |   |   |   |   |   |   |   |   |   |   |   |   |   |   |   |   |   |   |   |   |   |   |   |   |   |   |   |   |   |   |   |   |   |   |   |   |   |   |   |   |   |   |   |   |   |   |   |   |   |   |   |   |   |   |   |   |   |   |   |   |   |   |   |   |   |   |   |   |   |   |   |   |   |   |   |   |   |   |   |   |   |   |   |   |   |   |   |   |   |   |   |   |   |   |   |   |   |   |   |   |   |   |   |   |   |   |   |   |   |   |   |   |   |   |   |   |   |   |   |   |   |   |   |   |   |   |   |   |   |   |   |   |   |   |   |   |   |   |   |   |   |   |   |   |   |   |   |   |   |   |   |   |   |   |   |   |   |   |   |   |   |   |   |   |   |   |   |   |   |   |   |   |   |   |   |   |   |   |   |   |   |   |   |   |   |   |   |   |   |   |   |   |   |   |   |   |   |   |   |   |   |   |   |   |   |   |   |   |   |   |   |   |   |   |   |   |   |   |   |   |   |   |   |   |   |   |   |   |   |   |   |   |   |   |   |   |   |   |   |   |   |   |   |   |   |   |   |   |   |   |   |   |   |   |   |   |   |   |   |   |   |   |   |   |   |   |   |   |   |   |   |   |   |   |   |   |   |   |   |   |   |   |   |   |   |   |   |   |   |   |   |   |   |   |   |   |   |   |   |   |   |   |   |   |   |   |   |   |   |   |   |   |   |   |   |   |   |   |   |   |   |   |   |   |   |   |   |   |   |   |   |   |   |   |   |   |   |   |   |   |   |   |   |   |   |   |   |   |   |   |   |   |   |   |   |   |   |   |   |   |   |   |   |   |   |   |   |   |   |   |   |   |   |   |   |   |   |   |   |   |   |   |   |   |   |   |   |   |   |
| SARS-CoV-2 NC_045512.2 | (8001)  | ATG   | TTGG  | TG    | ATA   | GT    | GC     | G     | AAGT    | T--      | G       | CAGT        | TAA   | AAT  | G    | TTT | GAT      | G       | CTT | ACGTTA | A     | TAC    | GT    | T        | ---- | CAT      | CAA     | --     | CTTTT   | A--     | ACGTA   | CCAA  | TG   | GAA   |     |    |      |       |    |     |   |   |   |   |   |   |   |   |   |   |   |   |   |   |   |   |   |   |   |   |   |   |   |   |   |   |   |   |   |   |   |   |   |   |   |   |   |   |   |   |   |   |   |   |   |   |   |   |   |   |   |   |   |   |   |   |   |   |   |   |   |   |   |   |   |   |   |   |   |   |   |   |   |   |   |   |   |   |   |   |   |   |   |   |   |   |   |   |   |   |   |   |   |   |   |   |   |   |   |   |   |   |   |   |   |   |   |   |   |   |   |   |   |   |   |   |   |   |   |   |   |   |   |   |   |   |   |   |   |   |   |   |   |   |   |   |   |   |   |   |   |   |   |   |   |   |   |   |   |   |   |   |   |   |   |   |   |   |   |   |   |   |   |   |   |   |   |   |   |   |   |   |   |   |   |   |   |   |   |   |   |   |   |   |   |   |   |   |   |   |   |   |   |   |   |   |   |   |   |   |   |   |   |   |   |   |   |   |   |   |   |   |   |   |   |   |   |   |   |   |   |   |   |   |   |   |   |   |   |   |   |   |   |   |   |   |   |   |   |   |   |   |   |   |   |   |   |   |   |   |   |   |   |   |   |   |   |   |   |   |   |   |   |   |   |   |   |   |   |   |   |   |   |   |   |   |   |   |   |   |   |   |   |   |   |   |   |   |   |   |   |   |   |   |   |   |   |   |   |   |   |   |   |   |   |   |   |   |   |   |   |   |   |   |   |   |   |   |   |   |   |   |   |   |   |   |   |   |   |   |   |   |   |   |   |   |   |   |   |   |   |   |   |   |   |   |   |   |   |   |   |   |   |   |   |   |   |   |   |   |   |   |   |   |   |   |   |   |   |   |   |   |   |   |   |   |   |   |   |   |   |   |   |   |   |   |   |   |   |   |   |   |   |   |   |   |   |   |   |   |   |   |   |   |   |   |   |   |   |   |   |   |   |   |   |   |   |   |   |   |   |   |   |   |   |   |   |   |   |   |   |   |   |   |   |   |   |   |   |   |   |   |   |   |   |   |   |   |   |   |   |   |   |   |   |   |   |   |   |   |   |   |   |   |   |   |   |   |   |   |   |   |   |   |   |   |   |   |   |   |   |   |   |   |   |   |   |   |   |   |   |   |   |   |   |   |   |   |   |   |   |   |   |   |   |   |   |   |   |   |   |   |   |   |   |   |   |   |   |   |   |   |   |   |   |   |   |   |   |   |   |   |   |   |   |   |   |   |   |   |   |   |   |   |   |   |   |   |   |   |   |   |   |   |   |   |   |   |   |   |   |   |   |   |   |   |   |   |   |   |   |   |   |   |   |   |   |   |   |   |   |   |   |   |   |   |   |   |   |   |   |   |   |   |   |   |   |   |   |   |   |   |   |   |   |   |   |   |   |   |   |   |   |   |   |   |   |   |   |   |   |   |   |   |   |   |   |   |   |   |   |   |   |   |   |   |   |   |   |   |   |   |   |   |   |   |   |   |   |   |   |   |   |   |   |   |   |   |   |   |   |   |   |   |   |   |   |   |   |   |   |   |   |   |   |   |   |   |   |   |   |   |   |   |   |   |   |   |   |   |   |   |   |   |   |   |   |   |   |   |   |   |   |   |   |   |   |   |   |   |   |   |   |   |   |   |   |   |   |   |   |   |   |   |   |   |   |   |   |   |   |   |   |   |   |   |   |   |   |   |   |   |   |   |   |   |   |   |   |   |   |   |   |   |   |   |   |   |   |   |   |   |   |   |   |   |   |   |   |   |   |   |   |   |   |   |   |   |   |   |   |   |   |   |   |   |   |   |   |   |   |   |   |   |   |   |   |   |   |   |   |   |   |   |   |   |   |   |   |   |   |   |   |   |   |   |   |   |   |   |   |   |   |   |   |   |   |   |   |   |   |   |   |   |   |   |   |   |   |   |   |   |   |   |   |   |   |   |   |   |   |   |   |   |   |   |   |   |   |   |   |   |   |   |   |   |   |   |   |   |   |   |   |   |   |   |   |   |   |   |   |   |   |   |   |   |   |   |   |   |   |   |   |   |   |   |   |   |   |   |   |   |   |   |   |   |   |   |   |   |   |   |   |   |   |
|                        |         |       |       |       |       |       |        |       |         |          |         | Section 128 |       |      |      |     |          |         |     |        |       |        |       |          |      |          |         |        |         |         |         |       |      |       |     |    |      |       |    |     |   |   |   |   |   |   |   |   |   |   |   |   |   |   |   |   |   |   |   |   |   |   |   |   |   |   |   |   |   |   |   |   |   |   |   |   |   |   |   |   |   |   |   |   |   |   |   |   |   |   |   |   |   |   |   |   |   |   |   |   |   |   |   |   |   |   |   |   |   |   |   |   |   |   |   |   |   |   |   |   |   |   |   |   |   |   |   |   |   |   |   |   |   |   |   |   |   |   |   |   |   |   |   |   |   |   |   |   |   |   |   |   |   |   |   |   |   |   |   |   |   |   |   |   |   |   |   |   |   |   |   |   |   |   |   |   |   |   |   |   |   |   |   |   |   |   |   |   |   |   |   |   |   |   |   |   |   |   |   |   |   |   |   |   |   |   |   |   |   |   |   |   |   |   |   |   |   |   |   |   |   |   |   |   |   |   |   |   |   |   |   |   |   |   |   |   |   |   |   |   |   |   |   |   |   |   |   |   |   |   |   |   |   |   |   |   |   |   |   |   |   |   |   |   |   |   |   |   |   |   |   |   |   |   |   |   |   |   |   |   |   |   |   |   |   |   |   |   |   |   |   |   |   |   |   |   |   |   |   |   |   |   |   |   |   |   |   |   |   |   |   |   |   |   |   |   |   |   |   |   |   |   |   |   |   |   |   |   |   |   |   |   |   |   |   |   |   |   |   |   |   |   |   |   |   |   |   |   |   |   |   |   |   |   |   |   |   |   |   |   |   |   |   |   |   |   |   |   |   |   |   |   |   |   |   |   |   |   |   |   |   |   |   |   |   |   |   |   |   |   |   |   |   |   |   |   |   |   |   |   |   |   |   |   |   |   |   |   |   |   |   |   |   |   |   |   |   |   |   |   |   |   |   |   |   |   |   |   |   |   |   |   |   |   |   |   |   |   |   |   |   |   |   |   |   |   |   |   |   |   |   |   |   |   |   |   |   |   |   |   |   |   |   |   |   |   |   |   |   |   |   |   |   |   |   |   |   |   |   |   |   |   |   |   |   |   |   |   |   |   |   |   |   |   |   |   |   |   |   |   |   |   |   |   |   |   |   |   |   |   |   |   |   |   |   |   |   |   |   |   |   |   |   |   |   |   |   |   |   |   |   |   |   |   |   |   |   |   |   |   |   |   |   |   |   |   |   |   |   |   |   |   |   |   |   |   |   |   |   |   |   |   |   |   |   |   |   |   |   |   |   |   |   |   |   |   |   |   |   |   |   |   |   |   |   |   |   |   |   |   |   |   |   |   |   |   |   |   |   |   |   |   |   |   |   |   |   |   |   |   |   |   |   |   |   |   |   |   |   |   |   |   |   |   |   |   |   |   |   |   |   |   |   |   |   |   |   |   |   |   |   |   |   |   |   |   |   |   |   |   |   |   |   |   |   |   |   |   |   |   |   |   |   |   |   |   |   |   |   |   |   |   |   |   |   |   |   |   |   |   |   |   |   |   |   |   |   |   |   |   |   |   |   |   |   |   |   |   |   |   |   |   |   |   |   |   |   |   |   |   |   |   |   |   |   |   |   |   |   |   |   |   |   |   |   |   |   |   |   |   |   |   |   |   |   |   |   |   |   |   |   |   |   |   |   |   |   |   |   |   |   |   |   |   |   |   |   |   |   |   |   |   |   |   |   |   |   |   |   |   |   |   |   |   |   |   |   |   |   |   |   |   |   |   |   |   |   |   |   |   |   |   |   |   |   |   |   |   |   |   |   |   |   |   |   |   |   |   |   |   |   |   |   |   |   |   |   |   |   |   |   |   |   |   |   |   |   |   |   |   |   |   |   |   |   |   |   |   |   |   |   |   |   |   |   |   |   |   |   |   |   |   |   |   |   |   |   |   |   |   |   |   |   |   |   |   |   |   |   |   |   |   |   |   |   |   |   |   |   |   |   |   |   |   |   |   |   |   |   |   |   |   |   |   |   |   |   |   |   |   |   |   |   |   |   |   |   |   |   |   |   |   |   |   |   |   |   |   |   |   |   |   |   |   |   |   |   |   |   |   |   |   |   |   |   |   |   |   |   |   |   |   |   |   |   |   |   |   |   |   |   |   |   |   |   |
|                        | (12320) | 12320 | 12330 | 12340 | 12350 | 12360 | 12370  | 12380 | 12390   | 12400    | 12416   |             |       |      |      |     |          |         |     |        |       |        |       |          |      |          |         |        |         |         |         |       |      |       |     |    |      |       |    |     |   |   |   |   |   |   |   |   |   |   |   |   |   |   |   |   |   |   |   |   |   |   |   |   |   |   |   |   |   |   |   |   |   |   |   |   |   |   |   |   |   |   |   |   |   |   |   |   |   |   |   |   |   |   |   |   |   |   |   |   |   |   |   |   |   |   |   |   |   |   |   |   |   |   |   |   |   |   |   |   |   |   |   |   |   |   |   |   |   |   |   |   |   |   |   |   |   |   |   |   |   |   |   |   |   |   |   |   |   |   |   |   |   |   |   |   |   |   |   |   |   |   |   |   |   |   |   |   |   |   |   |   |   |   |   |   |   |   |   |   |   |   |   |   |   |   |   |   |   |   |   |   |   |   |   |   |   |   |   |   |   |   |   |   |   |   |   |   |   |   |   |   |   |   |   |   |   |   |   |   |   |   |   |   |   |   |   |   |   |   |   |   |   |   |   |   |   |   |   |   |   |   |   |   |   |   |   |   |   |   |   |   |   |   |   |   |   |   |   |   |   |   |   |   |   |   |   |   |   |   |   |   |   |   |   |   |   |   |   |   |   |   |   |   |   |   |   |   |   |   |   |   |   |   |   |   |   |   |   |   |   |   |   |   |   |   |   |   |   |   |   |   |   |   |   |   |   |   |   |   |   |   |   |   |   |   |   |   |   |   |   |   |   |   |   |   |   |   |   |   |   |   |   |   |   |   |   |   |   |   |   |   |   |   |   |   |   |   |   |   |   |   |   |   |   |   |   |   |   |   |   |   |   |   |   |   |   |   |   |   |   |   |   |   |   |   |   |   |   |   |   |   |   |   |   |   |   |   |   |   |   |   |   |   |   |   |   |   |   |   |   |   |   |   |   |   |   |   |   |   |   |   |   |   |   |   |   |   |   |   |   |   |   |   |   |   |   |   |   |   |   |   |   |   |   |   |   |   |   |   |   |   |   |   |   |   |   |   |   |   |   |   |   |   |   |   |   |   |   |   |   |   |   |   |   |   |   |   |   |   |   |   |   |   |   |   |   |   |   |   |   |   |   |   |   |   |   |   |   |   |   |   |   |   |   |   |   |   |   |   |   |   |   |   |   |   |   |   |   |   |   |   |   |   |   |   |   |   |   |   |   |   |   |   |   |   |   |   |   |   |   |   |   |   |   |   |   |   |   |   |   |   |   |   |   |   |   |   |   |   |   |   |   |   |   |   |   |   |   |   |   |   |   |   |   |   |   |   |   |   |   |   |   |   |   |   |   |   |   |   |   |   |   |   |   |   |   |   |   |   |   |   |   |   |   |   |   |   |   |   |   |   |   |   |   |   |   |   |   |   |   |   |   |   |   |   |   |   |   |   |   |   |   |   |   |   |   |   |   |   |   |   |   |   |   |   |   |   |   |   |   |   |   |   |   |   |   |   |   |   |   |   |   |   |   |   |   |   |   |   |   |   |   |   |   |   |   |   |   |   |   |   |   |   |   |   |   |   |   |   |   |   |   |   |   |   |   |   |   |   |   |   |   |   |   |   |   |   |   |   |   |   |   |   |   |   |   |   |   |   |   |   |   |   |   |   |   |   |   |   |   |   |   |   |   |   |   |   |   |   |   |   |   |   |   |   |   |   |   |   |   |   |   |   |   |   |   |   |   |   |   |   |   |   |   |   |   |   |   |   |   |   |   |   |   |   |   |   |   |   |   |   |   |   |   |   |   |   |   |   |   |   |   |   |   |   |   |   |   |   |   |   |   |   |   |   |   |   |   |   |   |   |   |   |   |   |   |   |   |   |   |   |   |   |   |   |   |   |   |   |   |   |   |   |   |   |   |   |   |   |   |   |   |   |   |   |   |   |   |   |   |   |   |   |   |   |   |   |   |   |   |   |   |   |   |   |   |   |   |   |   |   |   |   |   |   |   |   |   |   |   |   |   |   |   |   |   |   |   |   |   |   |   |   |   |   |   |   |   |   |   |   |   |   |   |   |   |   |   |   |   |   |   |   |   |   |   |   |   |   |   |   |   |   |   |   |   |   |   |   |   |   |   |   |   |   |   |   |   |   |   |   |   |   |   |   |   |   |   |   |   |   |   |   |   |
| Ad 12 X73487           | (11790) | CT    | AAC   | CCT   | AC    | -T    | CAC    | G---- | AGAAAGT | GTTAACC  | ATT     | GTA         | AA    | TG   | CT   | T   | TGT      | T       | GGA | TAG    | CA    | AA     | GCCA  | TCCG     | CAA  | AGAT     | TGAGGC  | T      | GGTTTAA | TATA    | CAA     |       |      |       |     |    |      |       |    |     |   |   |   |   |   |   |   |   |   |   |   |   |   |   |   |   |   |   |   |   |   |   |   |   |   |   |   |   |   |   |   |   |   |   |   |   |   |   |   |   |   |   |   |   |   |   |   |   |   |   |   |   |   |   |   |   |   |   |   |   |   |   |   |   |   |   |   |   |   |   |   |   |   |   |   |   |   |   |   |   |   |   |   |   |   |   |   |   |   |   |   |   |   |   |   |   |   |   |   |   |   |   |   |   |   |   |   |   |   |   |   |   |   |   |   |   |   |   |   |   |   |   |   |   |   |   |   |   |   |   |   |   |   |   |   |   |   |   |   |   |   |   |   |   |   |   |   |   |   |   |   |   |   |   |   |   |   |   |   |   |   |   |   |   |   |   |   |   |   |   |   |   |   |   |   |   |   |   |   |   |   |   |   |   |   |   |   |   |   |   |   |   |   |   |   |   |   |   |   |   |   |   |   |   |   |   |   |   |   |   |   |   |   |   |   |   |   |   |   |   |   |   |   |   |   |   |   |   |   |   |   |   |   |   |   |   |   |   |   |   |   |   |   |   |   |   |   |   |   |   |   |   |   |   |   |   |   |   |   |   |   |   |   |   |   |   |   |   |   |   |   |   |   |   |   |   |   |   |   |   |   |   |   |   |   |   |   |   |   |   |   |   |   |   |   |   |   |   |   |   |   |   |   |   |   |   |   |   |   |   |   |   |   |   |   |   |   |   |   |   |   |   |   |   |   |   |   |   |   |   |   |   |   |   |   |   |   |   |   |   |   |   |   |   |   |   |   |   |   |   |   |   |   |   |   |   |   |   |   |   |   |   |   |   |   |   |   |   |   |   |   |   |   |   |   |   |   |   |   |   |   |   |   |   |   |   |   |   |   |   |   |   |   |   |   |   |   |   |   |   |   |   |   |   |   |   |   |   |   |   |   |   |   |   |   |   |   |   |   |   |   |   |   |   |   |   |   |   |   |   |   |   |   |   |   |   |   |   |   |   |   |   |   |   |   |   |   |   |   |   |   |   |   |   |   |   |   |   |   |   |   |   |   |   |   |   |   |   |   |   |   |   |   |   |   |   |   |   |   |   |   |   |   |   |   |   |   |   |   |   |   |   |   |   |   |   |   |   |   |   |   |   |   |   |   |   |   |   |   |   |   |   |   |   |   |   |   |   |   |   |   |   |   |   |   |   |   |   |   |   |   |   |   |   |   |   |   |   |   |   |   |   |   |   |   |   |   |   |   |   |   |   |   |   |   |   |   |   |   |   |   |   |   |   |   |   |   |   |   |   |   |   |   |   |   |   |   |   |   |   |   |   |   |   |   |   |   |   |   |   |   |   |   |   |   |   |   |   |   |   |   |   |   |   |   |   |   |   |   |   |   |   |   |   |   |   |   |   |   |   |   |   |   |   |   |   |   |   |   |   |   |   |   |   |   |   |   |   |   |   |   |   |   |   |   |   |   |   |   |   |   |   |   |   |   |   |   |   |   |   |   |   |   |   |   |   |   |   |   |   |   |   |   |   |   |   |   |   |   |   |   |   |   |   |   |   |   |   |   |   |   |   |   |   |   |   |   |   |   |   |   |   |   |   |   |   |   |   |   |   |   |   |   |   |   |   |   |   |   |   |   |   |   |   |   |   |   |   |   |   |   |   |   |   |   |   |   |   |   |   |   |   |   |   |   |   |   |   |   |   |   |   |   |   |   |   |   |   |   |   |   |   |   |   |   |   |   |   |   |   |   |   |   |   |   |   |   |   |   |   |   |   |   |   |   |   |   |   |   |   |   |   |   |   |   |   |   |   |   |   |   |   |   |   |   |   |   |   |   |   |   |   |   |   |   |   |   |   |   |   |   |   |   |   |   |   |   |   |   |   |   |   |   |   |   |   |   |   |   |   |   |   |   |   |   |   |   |   |   |   |   |   |   |   |   |   |   |   |   |   |   |   |   |   |   |   |   |   |   |   |   |   |   |   |   |   |   |   |   |   |   |   |   |   |   |   |   |   |   |   |   |   |   |   |   |   |   |   |   |   |   |   |   |   |   |   |   |   |   |   |   |   |   |   |   |
| SARS-CoV-2 NC_045512.2 | (8087)  | AA    | ACT   | CAA   | AA    | ACA   | CTAG   | TTG   | CA      | ACTGCAGA | AAGCTGA | ACT         | TGC   | AA   | AG   | AAT | TGT      | G       | T   | CCT    | TAG   | AC     | AA    | TGTC     | TTAT | CT       | -ACT    | TTTATT | T       | CAGCAGC | T       | CGG   | CAA  |       |     |    |      |       |    |     |   |   |   |   |   |   |   |   |   |   |   |   |   |   |   |   |   |   |   |   |   |   |   |   |   |   |   |   |   |   |   |   |   |   |   |   |   |   |   |   |   |   |   |   |   |   |   |   |   |   |   |   |   |   |   |   |   |   |   |   |   |   |   |   |   |   |   |   |   |   |   |   |   |   |   |   |   |   |   |   |   |   |   |   |   |   |   |   |   |   |   |   |   |   |   |   |   |   |   |   |   |   |   |   |   |   |   |   |   |   |   |   |   |   |   |   |   |   |   |   |   |   |   |   |   |   |   |   |   |   |   |   |   |   |   |   |   |   |   |   |   |   |   |   |   |   |   |   |   |   |   |   |   |   |   |   |   |   |   |   |   |   |   |   |   |   |   |   |   |   |   |   |   |   |   |   |   |   |   |   |   |   |   |   |   |   |   |   |   |   |   |   |   |   |   |   |   |   |   |   |   |   |   |   |   |   |   |   |   |   |   |   |   |   |   |   |   |   |   |   |   |   |   |   |   |   |   |   |   |   |   |   |   |   |   |   |   |   |   |   |   |   |   |   |   |   |   |   |   |   |   |   |   |   |   |   |   |   |   |   |   |   |   |   |   |   |   |   |   |   |   |   |   |   |   |   |   |   |   |   |   |   |   |   |   |   |   |   |   |   |   |   |   |   |   |   |   |   |   |   |   |   |   |   |   |   |   |   |   |   |   |   |   |   |   |   |   |   |   |   |   |   |   |   |   |   |   |   |   |   |   |   |   |   |   |   |   |   |   |   |   |   |   |   |   |   |   |   |   |   |   |   |   |   |   |   |   |   |   |   |   |   |   |   |   |   |   |   |   |   |   |   |   |   |   |   |   |   |   |   |   |   |   |   |   |   |   |   |   |   |   |   |   |   |   |   |   |   |   |   |   |   |   |   |   |   |   |   |   |   |   |   |   |   |   |   |   |   |   |   |   |   |   |   |   |   |   |   |   |   |   |   |   |   |   |   |   |   |   |   |   |   |   |   |   |   |   |   |   |   |   |   |   |   |   |   |   |   |   |   |   |   |   |   |   |   |   |   |   |   |   |   |   |   |   |   |   |   |   |   |   |   |   |   |   |   |   |   |   |   |   |   |   |   |   |   |   |   |   |   |   |   |   |   |   |   |   |   |   |   |   |   |   |   |   |   |   |   |   |   |   |   |   |   |   |   |   |   |   |   |   |   |   |   |   |   |   |   |   |   |   |   |   |   |   |   |   |   |   |   |   |   |   |   |   |   |   |   |   |   |   |   |   |   |   |   |   |   |   |   |   |   |   |   |   |   |   |   |   |   |   |   |   |   |   |   |   |   |   |   |   |   |   |   |   |   |   |   |   |   |   |   |   |   |   |   |   |   |   |   |   |   |   |   |   |   |   |   |   |   |   |   |   |   |   |   |   |   |   |   |   |   |   |   |   |   |   |   |   |   |   |   |   |   |   |   |   |   |   |   |   |   |   |   |   |   |   |   |   |   |   |   |   |   |   |   |   |   |   |   |   |   |   |   |   |   |   |   |   |   |   |   |   |   |   |   |   |   |   |   |   |   |   |   |   |   |   |   |   |   |   |   |   |   |   |   |   |   |   |   |   |   |   |   |   |   |   |   |   |   |   |   |   |   |   |   |   |   |   |   |   |   |   |   |   |   |   |   |   |   |   |   |   |   |   |   |   |   |   |   |   |   |   |   |   |   |   |   |   |   |   |   |   |   |   |   |   |   |   |   |   |   |   |   |   |   |   |   |   |   |   |   |   |   |   |   |   |   |   |   |   |   |   |   |   |   |   |   |   |   |   |   |   |   |   |   |   |   |   |   |   |   |   |   |   |   |   |   |   |   |   |   |   |   |   |   |   |   |   |   |   |   |   |   |   |   |   |   |   |   |   |   |   |   |   |   |   |   |   |   |   |   |   |   |   |   |   |   |   |   |   |   |   |   |   |   |   |   |   |   |   |   |   |   |   |   |   |   |   |   |   |   |   |   |   |   |   |   |   |   |   |   |   |   |   |   |   |   |   |   |   |   |   |   |   |   |   |   |   |   |   |   |   |   |   |
|                        |         |       |       |       |       |       |        |       |         |          |         | Section 129 |       |      |      |     |          |         |     |        |       |        |       |          |      |          |         |        |         |         |         |       |      |       |     |    |      |       |    |     |   |   |   |   |   |   |   |   |   |   |   |   |   |   |   |   |   |   |   |   |   |   |   |   |   |   |   |   |   |   |   |   |   |   |   |   |   |   |   |   |   |   |   |   |   |   |   |   |   |   |   |   |   |   |   |   |   |   |   |   |   |   |   |   |   |   |   |   |   |   |   |   |   |   |   |   |   |   |   |   |   |   |   |   |   |   |   |   |   |   |   |   |   |   |   |   |   |   |   |   |   |   |   |   |   |   |   |   |   |   |   |   |   |   |   |   |   |   |   |   |   |   |   |   |   |   |   |   |   |   |   |   |   |   |   |   |   |   |   |   |   |   |   |   |   |   |   |   |   |   |   |   |   |   |   |   |   |   |   |   |   |   |   |   |   |   |   |   |   |   |   |   |   |   |   |   |   |   |   |   |   |   |   |   |   |   |   |   |   |   |   |   |   |   |   |   |   |   |   |   |   |   |   |   |   |   |   |   |   |   |   |   |   |   |   |   |   |   |   |   |   |   |   |   |   |   |   |   |   |   |   |   |   |   |   |   |   |   |   |   |   |   |   |   |   |   |   |   |   |   |   |   |   |   |   |   |   |   |   |   |   |   |   |   |   |   |   |   |   |   |   |   |   |   |   |   |   |   |   |   |   |   |   |   |   |   |   |   |   |   |   |   |   |   |   |   |   |   |   |   |   |   |   |   |   |   |   |   |   |   |   |   |   |   |   |   |   |   |   |   |   |   |   |   |   |   |   |   |   |   |   |   |   |   |   |   |   |   |   |   |   |   |   |   |   |   |   |   |   |   |   |   |   |   |   |   |   |   |   |   |   |   |   |   |   |   |   |   |   |   |   |   |   |   |   |   |   |   |   |   |   |   |   |   |   |   |   |   |   |   |   |   |   |   |   |   |   |   |   |   |   |   |   |   |   |   |   |   |   |   |   |   |   |   |   |   |   |   |   |   |   |   |   |   |   |   |   |   |   |   |   |   |   |   |   |   |   |   |   |   |   |   |   |   |   |   |   |   |   |   |   |   |   |   |   |   |   |   |   |   |   |   |   |   |   |   |   |   |   |   |   |   |   |   |   |   |   |   |   |   |   |   |   |   |   |   |   |   |   |   |   |   |   |   |   |   |   |   |   |   |   |   |   |   |   |   |   |   |   |   |   |   |   |   |   |   |   |   |   |   |   |   |   |   |   |   |   |   |   |   |   |   |   |   |   |   |   |   |   |   |   |   |   |   |   |   |   |   |   |   |   |   |   |   |   |   |   |   |   |   |   |   |   |   |   |   |   |   |   |   |   |   |   |   |   |   |   |   |   |   |   |   |   |   |   |   |   |   |   |   |   |   |   |   |   |   |   |   |   |   |   |   |   |   |   |   |   |   |   |   |   |   |   |   |   |   |   |   |   |   |   |   |   |   |   |   |   |   |   |   |   |   |   |   |   |   |   |   |   |   |   |   |   |   |   |   |   |   |   |   |   |   |   |   |   |   |   |   |   |   |   |   |   |   |   |   |   |   |   |   |   |   |   |   |   |   |   |   |   |   |   |   |   |   |   |   |   |   |   |   |   |   |   |   |   |   |   |   |   |   |   |   |   |   |   |   |   |   |   |   |   |   |   |   |   |   |   |   |   |   |   |   |   |   |   |   |   |   |   |   |   |   |   |   |   |   |   |   |   |   |   |   |   |   |   |   |   |   |   |   |   |   |   |   |   |   |   |   |   |   |   |   |   |   |   |   |   |   |   |   |   |   |   |   |   |   |   |   |   |   |   |   |   |   |   |   |   |   |   |   |   |   |   |   |   |   |   |   |   |   |   |   |   |   |   |   |   |   |   |   |   |   |   |   |   |   |   |   |   |   |   |   |   |   |   |   |   |   |   |   |   |   |   |   |   |   |   |   |   |   |   |   |   |   |   |   |   |   |   |   |   |   |   |   |   |   |   |   |   |   |   |   |   |   |   |   |   |   |   |   |   |   |   |   |   |   |   |   |   |   |   |   |   |   |   |   |   |   |   |   |   |   |   |   |   |   |   |   |   |   |   |   |   |   |   |   |   |   |   |   |   |   |   |   |   |
|                        | (12417) | 12417 | 12430 | 12440 | 12450 | 12460 | 12470  | 12480 | 12490   | 12500    | 12513   |             |       |      |      |     |          |         |     |        |       |        |       |          |      |          |         |        |         |         |         |       |      |       |     |    |      |       |    |     |   |   |   |   |   |   |   |   |   |   |   |   |   |   |   |   |   |   |   |   |   |   |   |   |   |   |   |   |   |   |   |   |   |   |   |   |   |   |   |   |   |   |   |   |   |   |   |   |   |   |   |   |   |   |   |   |   |   |   |   |   |   |   |   |   |   |   |   |   |   |   |   |   |   |   |   |   |   |   |   |   |   |   |   |   |   |   |   |   |   |   |   |   |   |   |   |   |   |   |   |   |   |   |   |   |   |   |   |   |   |   |   |   |   |   |   |   |   |   |   |   |   |   |   |   |   |   |   |   |   |   |   |   |   |   |   |   |   |   |   |   |   |   |   |   |   |   |   |   |   |   |   |   |   |   |   |   |   |   |   |   |   |   |   |   |   |   |   |   |   |   |   |   |   |   |   |   |   |   |   |   |   |   |   |   |   |   |   |   |   |   |   |   |   |   |   |   |   |   |   |   |   |   |   |   |   |   |   |   |   |   |   |   |   |   |   |   |   |   |   |   |   |   |   |   |   |   |   |   |   |   |   |   |   |   |   |   |   |   |   |   |   |   |   |   |   |   |   |   |   |   |   |   |   |   |   |   |   |   |   |   |   |   |   |   |   |   |   |   |   |   |   |   |   |   |   |   |   |   |   |   |   |   |   |   |   |   |   |   |   |   |   |   |   |   |   |   |   |   |   |   |   |   |   |   |   |   |   |   |   |   |   |   |   |   |   |   |   |   |   |   |   |   |   |   |   |   |   |   |   |   |   |   |   |   |   |   |   |   |   |   |   |   |   |   |   |   |   |   |   |   |   |   |   |   |   |   |   |   |   |   |   |   |   |   |   |   |   |   |   |   |   |   |   |   |   |   |   |   |   |   |   |   |   |   |   |   |   |   |   |   |   |   |   |   |   |   |   |   |   |   |   |   |   |   |   |   |   |   |   |   |   |   |   |   |   |   |   |   |   |   |   |   |   |   |   |   |   |   |   |   |   |   |   |   |   |   |   |   |   |   |   |   |   |   |   |   |   |   |   |   |   |   |   |   |   |   |   |   |   |   |   |   |   |   |   |   |   |   |   |   |   |   |   |   |   |   |   |   |   |   |   |   |   |   |   |   |   |   |   |   |   |   |   |   |   |   |   |   |   |   |   |   |   |   |   |   |   |   |   |   |   |   |   |   |   |   |   |   |   |   |   |   |   |   |   |   |   |   |   |   |   |   |   |   |   |   |   |   |   |   |   |   |   |   |   |   |   |   |   |   |   |   |   |   |   |   |   |   |   |   |   |   |   |   |   |   |   |   |   |   |   |   |   |   |   |   |   |   |   |   |   |   |   |   |   |   |   |   |   |   |   |   |   |   |   |   |   |   |   |   |   |   |   |   |   |   |   |   |   |   |   |   |   |   |   |   |   |   |   |   |   |   |   |   |   |   |   |   |   |   |   |   |   |   |   |   |   |   |   |   |   |   |   |   |   |   |   |   |   |   |   |   |   |   |   |   |   |   |   |   |   |   |   |   |   |   |   |   |   |   |   |   |   |   |   |   |   |   |   |   |   |   |   |   |   |   |   |   |   |   |   |   |   |   |   |   |   |   |   |   |   |   |   |   |   |   |   |   |   |   |   |   |   |   |   |   |   |   |   |   |   |   |   |   |   |   |   |   |   |   |   |   |   |   |   |   |   |   |   |   |   |   |   |   |   |   |   |   |   |   |   |   |   |   |   |   |   |   |   |   |   |   |   |   |   |   |   |   |   |   |   |   |   |   |   |   |   |   |   |   |   |   |   |   |   |   |   |   |   |   |   |   |   |   |   |   |   |   |   |   |   |   |   |   |   |   |   |   |   |   |   |   |   |   |   |   |   |   |   |   |   |   |   |   |   |   |   |   |   |   |   |   |   |   |   |   |   |   |   |   |   |   |   |   |   |   |   |   |   |   |   |   |   |   |   |   |   |   |   |   |   |   |   |   |   |   |   |   |   |   |   |   |   |   |   |   |   |   |   |   |   |   |   |   |   |   |   |   |   |   |   |   |   |   |   |   |   |   |   |   |   |   |   |   |   |   |   |   |   |   |   |   |   |   |
| Ad 12 X73487           | (11881) | C     | G     | TTT   | TG    | C     | TTGAG  | C     | GCG---- | T        | G       | C           | AC    | GCT  | A    | T   | A        | CAGTACC | AAT | GT     | GC    | -AGGCT | TAA   | C        | TTAG | -ACCGGAT | TGGGTAC | AGAT   | TGTAA   | A       | G       | GAGGC | G    | CTG   | GCT |    |      |       |    |     |   |   |   |   |   |   |   |   |   |   |   |   |   |   |   |   |   |   |   |   |   |   |   |   |   |   |   |   |   |   |   |   |   |   |   |   |   |   |   |   |   |   |   |   |   |   |   |   |   |   |   |   |   |   |   |   |   |   |   |   |   |   |   |   |   |   |   |   |   |   |   |   |   |   |   |   |   |   |   |   |   |   |   |   |   |   |   |   |   |   |   |   |   |   |   |   |   |   |   |   |   |   |   |   |   |   |   |   |   |   |   |   |   |   |   |   |   |   |   |   |   |   |   |   |   |   |   |   |   |   |   |   |   |   |   |   |   |   |   |   |   |   |   |   |   |   |   |   |   |   |   |   |   |   |   |   |   |   |   |   |   |   |   |   |   |   |   |   |   |   |   |   |   |   |   |   |   |   |   |   |   |   |   |   |   |   |   |   |   |   |   |   |   |   |   |   |   |   |   |   |   |   |   |   |   |   |   |   |   |   |   |   |   |   |   |   |   |   |   |   |   |   |   |   |   |   |   |   |   |   |   |   |   |   |   |   |   |   |   |   |   |   |   |   |   |   |   |   |   |   |   |   |   |   |   |   |   |   |   |   |   |   |   |   |   |   |   |   |   |   |   |   |   |   |   |   |   |   |   |   |   |   |   |   |   |   |   |   |   |   |   |   |   |   |   |   |   |   |   |   |   |   |   |   |   |   |   |   |   |   |   |   |   |   |   |   |   |   |   |   |   |   |   |   |   |   |   |   |   |   |   |   |   |   |   |   |   |   |   |   |   |   |   |   |   |   |   |   |   |   |   |   |   |   |   |   |   |   |   |   |   |   |   |   |   |   |   |   |   |   |   |   |   |   |   |   |   |   |   |   |   |   |   |   |   |   |   |   |   |   |   |   |   |   |   |   |   |   |   |   |   |   |   |   |   |   |   |   |   |   |   |   |   |   |   |   |   |   |   |   |   |   |   |   |   |   |   |   |   |   |   |   |   |   |   |   |   |   |   |   |   |   |   |   |   |   |   |   |   |   |   |   |   |   |   |   |   |   |   |   |   |   |   |   |   |   |   |   |   |   |   |   |   |   |   |   |   |   |   |   |   |   |   |   |   |   |   |   |   |   |   |   |   |   |   |   |   |   |   |   |   |   |   |   |   |   |   |   |   |   |   |   |   |   |   |   |   |   |   |   |   |   |   |   |   |   |   |   |   |   |   |   |   |   |   |   |   |   |   |   |   |   |   |   |   |   |   |   |   |   |   |   |   |   |   |   |   |   |   |   |   |   |   |   |   |   |   |   |   |   |   |   |   |   |   |   |   |   |   |   |   |   |   |   |   |   |   |   |   |   |   |   |   |   |   |   |   |   |   |   |   |   |   |   |   |   |   |   |   |   |   |   |   |   |   |   |   |   |   |   |   |   |   |   |   |   |   |   |   |   |   |   |   |   |   |   |   |   |   |   |   |   |   |   |   |   |   |   |   |   |   |   |   |   |   |   |   |   |   |   |   |   |   |   |   |   |   |   |   |   |   |   |   |   |   |   |   |   |   |   |   |   |   |   |   |   |   |   |   |   |   |   |   |   |   |   |   |   |   |   |   |   |   |   |   |   |   |   |   |   |   |   |   |   |   |   |   |   |   |   |   |   |   |   |   |   |   |   |   |   |   |   |   |   |   |   |   |   |   |   |   |   |   |   |   |   |   |   |   |   |   |   |   |   |   |   |   |   |   |   |   |   |   |   |   |   |   |   |   |   |   |   |   |   |   |   |   |   |   |   |   |   |   |   |   |   |   |   |   |   |   |   |   |   |   |   |   |   |   |   |   |   |   |   |   |   |   |   |   |   |   |   |   |   |   |   |   |   |   |   |   |   |   |   |   |   |   |   |   |   |   |   |   |   |   |   |   |   |   |   |   |   |   |   |   |   |   |   |   |   |   |   |   |   |   |   |   |   |   |   |   |   |   |   |   |   |   |   |   |   |   |   |   |   |   |   |   |   |   |   |   |   |   |   |   |   |   |   |   |   |   |   |   |   |   |   |   |   |   |   |   |   |   |   |   |   |   |   |   |   |   |   |   |   |   |
| SARS-CoV-2 NC_045512.2 | (8183)  | G     | G     | TTT   | TG    | T     | TGATT  | CAGAT | GTA     | -GAA     | AC      | TAA         | A     | G    | A    | T   | G        | T       | T   | G      | T     | T      | AAT   | TGT      | C    | AC       | ATC     | AATCTG | ACATAGA | AG      | -TTACTG | G     | C    | GATAG | G   | TG | TAA  |       |    |     |   |   |   |   |   |   |   |   |   |   |   |   |   |   |   |   |   |   |   |   |   |   |   |   |   |   |   |   |   |   |   |   |   |   |   |   |   |   |   |   |   |   |   |   |   |   |   |   |   |   |   |   |   |   |   |   |   |   |   |   |   |   |   |   |   |   |   |   |   |   |   |   |   |   |   |   |   |   |   |   |   |   |   |   |   |   |   |   |   |   |   |   |   |   |   |   |   |   |   |   |   |   |   |   |   |   |   |   |   |   |   |   |   |   |   |   |   |   |   |   |   |   |   |   |   |   |   |   |   |   |   |   |   |   |   |   |   |   |   |   |   |   |   |   |   |   |   |   |   |   |   |   |   |   |   |   |   |   |   |   |   |   |   |   |   |   |   |   |   |   |   |   |   |   |   |   |   |   |   |   |   |   |   |   |   |   |   |   |   |   |   |   |   |   |   |   |   |   |   |   |   |   |   |   |   |   |   |   |   |   |   |   |   |   |   |   |   |   |   |   |   |   |   |   |   |   |   |   |   |   |   |   |   |   |   |   |   |   |   |   |   |   |   |   |   |   |   |   |   |   |   |   |   |   |   |   |   |   |   |   |   |   |   |   |   |   |   |   |   |   |   |   |   |   |   |   |   |   |   |   |   |   |   |   |   |   |   |   |   |   |   |   |   |   |   |   |   |   |   |   |   |   |   |   |   |   |   |   |   |   |   |   |   |   |   |   |   |   |   |   |   |   |   |   |   |   |   |   |   |   |   |   |   |   |   |   |   |   |   |   |   |   |   |   |   |   |   |   |   |   |   |   |   |   |   |   |   |   |   |   |   |   |   |   |   |   |   |   |   |   |   |   |   |   |   |   |   |   |   |   |   |   |   |   |   |   |   |   |   |   |   |   |   |   |   |   |   |   |   |   |   |   |   |   |   |   |   |   |   |   |   |   |   |   |   |   |   |   |   |   |   |   |   |   |   |   |   |   |   |   |   |   |   |   |   |   |   |   |   |   |   |   |   |   |   |   |   |   |   |   |   |   |   |   |   |   |   |   |   |   |   |   |   |   |   |   |   |   |   |   |   |   |   |   |   |   |   |   |   |   |   |   |   |   |   |   |   |   |   |   |   |   |   |   |   |   |   |   |   |   |   |   |   |   |   |   |   |   |   |   |   |   |   |   |   |   |   |   |   |   |   |   |   |   |   |   |   |   |   |   |   |   |   |   |   |   |   |   |   |   |   |   |   |   |   |   |   |   |   |   |   |   |   |   |   |   |   |   |   |   |   |   |   |   |   |   |   |   |   |   |   |   |   |   |   |   |   |   |   |   |   |   |   |   |   |   |   |   |   |   |   |   |   |   |   |   |   |   |   |   |   |   |   |   |   |   |   |   |   |   |   |   |   |   |   |   |   |   |   |   |   |   |   |   |   |   |   |   |   |   |   |   |   |   |   |   |   |   |   |   |   |   |   |   |   |   |   |   |   |   |   |   |   |   |   |   |   |   |   |   |   |   |   |   |   |   |   |   |   |   |   |   |   |   |   |   |   |   |   |   |   |   |   |   |   |   |   |   |   |   |   |   |   |   |   |   |   |   |   |   |   |   |   |   |   |   |   |   |   |   |   |   |   |   |   |   |   |   |   |   |   |   |   |   |   |   |   |   |   |   |   |   |   |   |   |   |   |   |   |   |   |   |   |   |   |   |   |   |   |   |   |   |   |   |   |   |   |   |   |   |   |   |   |   |   |   |   |   |   |   |   |   |   |   |   |   |   |   |   |   |   |   |   |   |   |   |   |   |   |   |   |   |   |   |   |   |   |   |   |   |   |   |   |   |   |   |   |   |   |   |   |   |   |   |   |   |   |   |   |   |   |   |   |   |   |   |   |   |   |   |   |   |   |   |   |   |   |   |   |   |   |   |   |   |   |   |   |   |   |   |   |   |   |   |   |   |   |   |   |   |   |   |   |   |   |   |   |   |   |   |   |   |   |   |   |   |   |   |   |   |   |   |   |   |   |   |   |   |   |   |   |   |   |   |   |   |   |   |   |   |   |   |   |   |   |   |   |   |   |   |   |   |   |   |   |
|                        |         |       |       |       |       |       |        |       |         |          |         | Section 130 |       |      |      |     |          |         |     |        |       |        |       |          |      |          |         |        |         |         |         |       |      |       |     |    |      |       |    |     |   |   |   |   |   |   |   |   |   |   |   |   |   |   |   |   |   |   |   |   |   |   |   |   |   |   |   |   |   |   |   |   |   |   |   |   |   |   |   |   |   |   |   |   |   |   |   |   |   |   |   |   |   |   |   |   |   |   |   |   |   |   |   |   |   |   |   |   |   |   |   |   |   |   |   |   |   |   |   |   |   |   |   |   |   |   |   |   |   |   |   |   |   |   |   |   |   |   |   |   |   |   |   |   |   |   |   |   |   |   |   |   |   |   |   |   |   |   |   |   |   |   |   |   |   |   |   |   |   |   |   |   |   |   |   |   |   |   |   |   |   |   |   |   |   |   |   |   |   |   |   |   |   |   |   |   |   |   |   |   |   |   |   |   |   |   |   |   |   |   |   |   |   |   |   |   |   |   |   |   |   |   |   |   |   |   |   |   |   |   |   |   |   |   |   |   |   |   |   |   |   |   |   |   |   |   |   |   |   |   |   |   |   |   |   |   |   |   |   |   |   |   |   |   |   |   |   |   |   |   |   |   |   |   |   |   |   |   |   |   |   |   |   |   |   |   |   |   |   |   |   |   |   |   |   |   |   |   |   |   |   |   |   |   |   |   |   |   |   |   |   |   |   |   |   |   |   |   |   |   |   |   |   |   |   |   |   |   |   |   |   |   |   |   |   |   |   |   |   |   |   |   |   |   |   |   |   |   |   |   |   |   |   |   |   |   |   |   |   |   |   |   |   |   |   |   |   |   |   |   |   |   |   |   |   |   |   |   |   |   |   |   |   |   |   |   |   |   |   |   |   |   |   |   |   |   |   |   |   |   |   |   |   |   |   |   |   |   |   |   |   |   |   |   |   |   |   |   |   |   |   |   |   |   |   |   |   |   |   |   |   |   |   |   |   |   |   |   |   |   |   |   |   |   |   |   |   |   |   |   |   |   |   |   |   |   |   |   |   |   |   |   |   |   |   |   |   |   |   |   |   |   |   |   |   |   |   |   |   |   |   |   |   |   |   |   |   |   |   |   |   |   |   |   |   |   |   |   |   |   |   |   |   |   |   |   |   |   |   |   |   |   |   |   |   |   |   |   |   |   |   |   |   |   |   |   |   |   |   |   |   |   |   |   |   |   |   |   |   |   |   |   |   |   |   |   |   |   |   |   |   |   |   |   |   |   |   |   |   |   |   |   |   |   |   |   |   |   |   |   |   |   |   |   |   |   |   |   |   |   |   |   |   |   |   |   |   |   |   |   |   |   |   |   |   |   |   |   |   |   |   |   |   |   |   |   |   |   |   |   |   |   |   |   |   |   |   |   |   |   |   |   |   |   |   |   |   |   |   |   |   |   |   |   |   |   |   |   |   |   |   |   |   |   |   |   |   |   |   |   |   |   |   |   |   |   |   |   |   |   |   |   |   |   |   |   |   |   |   |   |   |   |   |   |   |   |   |   |   |   |   |   |   |   |   |   |   |   |   |   |   |   |   |   |   |   |   |   |   |   |   |   |   |   |   |   |   |   |   |   |   |   |   |   |   |   |   |   |   |   |   |   |   |   |   |   |   |   |   |   |   |   |   |   |   |   |   |   |   |   |   |   |   |   |   |   |   |   |   |   |   |   |   |   |   |   |   |   |   |   |   |   |   |   |   |   |   |   |   |   |   |   |   |   |   |   |   |   |   |   |   |   |   |   |   |   |   |   |   |   |   |   |   |   |   |   |   |   |   |   |   |   |   |   |   |   |   |   |   |   |   |   |   |   |   |   |   |   |   |   |   |   |   |   |   |   |   |   |   |   |   |   |   |   |   |   |   |   |   |   |   |   |   |   |   |   |   |   |   |   |   |   |   |   |   |   |   |   |   |   |   |   |   |   |   |   |   |   |   |   |   |   |   |   |   |   |   |   |   |   |   |   |   |   |   |   |   |   |   |   |   |   |   |   |   |   |   |   |   |   |   |   |   |   |   |   |   |   |   |   |   |   |   |   |   |   |   |   |   |   |   |   |   |   |   |   |   |   |   |   |   |   |   |   |   |   |   |   |   |   |   |   |   |   |   |   |   |   |   |   |   |   |   |   |   |
|                        | (12514) | 12514 | 12520 | 12530 | 12540 | 12550 | 12560  | 12570 | 12580   | 12590    | 12600   | 12610       |       |      |      |     |          |         |     |        |       |        |       |          |      |          |         |        |         |         |         |       |      |       |     |    |      |       |    |     |   |   |   |   |   |   |   |   |   |   |   |   |   |   |   |   |   |   |   |   |   |   |   |   |   |   |   |   |   |   |   |   |   |   |   |   |   |   |   |   |   |   |   |   |   |   |   |   |   |   |   |   |   |   |   |   |   |   |   |   |   |   |   |   |   |   |   |   |   |   |   |   |   |   |   |   |   |   |   |   |   |   |   |   |   |   |   |   |   |   |   |   |   |   |   |   |   |   |   |   |   |   |   |   |   |   |   |   |   |   |   |   |   |   |   |   |   |   |   |   |   |   |   |   |   |   |   |   |   |   |   |   |   |   |   |   |   |   |   |   |   |   |   |   |   |   |   |   |   |   |   |   |   |   |   |   |   |   |   |   |   |   |   |   |   |   |   |   |   |   |   |   |   |   |   |   |   |   |   |   |   |   |   |   |   |   |   |   |   |   |   |   |   |   |   |   |   |   |   |   |   |   |   |   |   |   |   |   |   |   |   |   |   |   |   |   |   |   |   |   |   |   |   |   |   |   |   |   |   |   |   |   |   |   |   |   |   |   |   |   |   |   |   |   |   |   |   |   |   |   |   |   |   |   |   |   |   |   |   |   |   |   |   |   |   |   |   |   |   |   |   |   |   |   |   |   |   |   |   |   |   |   |   |   |   |   |   |   |   |   |   |   |   |   |   |   |   |   |   |   |   |   |   |   |   |   |   |   |   |   |   |   |   |   |   |   |   |   |   |   |   |   |   |   |   |   |   |   |   |   |   |   |   |   |   |   |   |   |   |   |   |   |   |   |   |   |   |   |   |   |   |   |   |   |   |   |   |   |   |   |   |   |   |   |   |   |   |   |   |   |   |   |   |   |   |   |   |   |   |   |   |   |   |   |   |   |   |   |   |   |   |   |   |   |   |   |   |   |   |   |   |   |   |   |   |   |   |   |   |   |   |   |   |   |   |   |   |   |   |   |   |   |   |   |   |   |   |   |   |   |   |   |   |   |   |   |   |   |   |   |   |   |   |   |   |   |   |   |   |   |   |   |   |   |   |   |   |   |   |   |   |   |   |   |   |   |   |   |   |   |   |   |   |   |   |   |   |   |   |   |   |   |   |   |   |   |   |   |   |   |   |   |   |   |   |   |   |   |   |   |   |   |   |   |   |   |   |   |   |   |   |   |   |   |   |   |   |   |   |   |   |   |   |   |   |   |   |   |   |   |   |   |   |   |   |   |   |   |   |   |   |   |   |   |   |   |   |   |   |   |   |   |   |   |   |   |   |   |   |   |   |   |   |   |   |   |   |   |   |   |   |   |   |   |   |   |   |   |   |   |   |   |   |   |   |   |   |   |   |   |   |   |   |   |   |   |   |   |   |   |   |   |   |   |   |   |   |   |   |   |   |   |   |   |   |   |   |   |   |   |   |   |   |   |   |   |   |   |   |   |   |   |   |   |   |   |   |   |   |   |   |   |   |   |   |   |   |   |   |   |   |   |   |   |   |   |   |   |   |   |   |   |   |   |   |   |   |   |   |   |   |   |   |   |   |   |   |   |   |   |   |   |   |   |   |   |   |   |   |   |   |   |   |   |   |   |   |   |   |   |   |   |   |   |   |   |   |   |   |   |   |   |   |   |   |   |   |   |   |   |   |   |   |   |   |   |   |   |   |   |   |   |   |   |   |   |   |   |   |   |   |   |   |   |   |   |   |   |   |   |   |   |   |   |   |   |   |   |   |   |   |   |   |   |   |   |   |   |   |   |   |   |   |   |   |   |   |   |   |   |   |   |   |   |   |   |   |   |   |   |   |   |   |   |   |   |   |   |   |   |   |   |   |   |   |   |   |   |   |   |   |   |   |   |   |   |   |   |   |   |   |   |   |   |   |   |   |   |   |   |   |   |   |   |   |   |   |   |   |   |   |   |   |   |   |   |   |   |   |   |   |   |   |   |   |   |   |   |   |   |   |   |   |   |   |   |   |   |   |   |   |   |   |   |   |   |   |   |   |   |   |   |   |   |   |   |   |   |   |   |   |   |   |   |   |   |   |   |   |   |   |   |   |   |   |   |   |   |   |   |   |   |   |   |   |
| Ad 12 X73487           | (11977) | C     | AAC   | G     | AGAG  | -CG   | CTTT   | C     | ATCG    | C        | G--     | A           | T     | G    | T    | AA  | T        | CT      | TG  | G      | T     | T      | CG    | TAG      | TAG  | CAT      | TAAAC   | GCT    | ----    | T       | TTT     | TG    | -AGT | ACT   | CAG | C  | CGGC | TAATG | TT | CCG | C |   |   |   |   |   |   |   |   |   |   |   |   |   |   |   |   |   |   |   |   |   |   |   |   |   |   |   |   |   |   |   |   |   |   |   |   |   |   |   |   |   |   |   |   |   |   |   |   |   |   |   |   |   |   |   |   |   |   |   |   |   |   |   |   |   |   |   |   |   |   |   |   |   |   |   |   |   |   |   |   |   |   |   |   |   |   |   |   |   |   |   |   |   |   |   |   |   |   |   |   |   |   |   |   |   |   |   |   |   |   |   |   |   |   |   |   |   |   |   |   |   |   |   |   |   |   |   |   |   |   |   |   |   |   |   |   |   |   |   |   |   |   |   |   |   |   |   |   |   |   |   |   |   |   |   |   |   |   |   |   |   |   |   |   |   |   |   |   |   |   |   |   |   |   |   |   |   |   |   |   |   |   |   |   |   |   |   |   |   |   |   |   |   |   |   |   |   |   |   |   |   |   |   |   |   |   |   |   |   |   |   |   |   |   |   |   |   |   |   |   |   |   |   |   |   |   |   |   |   |   |   |   |   |   |   |   |   |   |   |   |   |   |   |   |   |   |   |   |   |   |   |   |   |   |   |   |   |   |   |   |   |   |   |   |   |   |   |   |   |   |   |   |   |   |   |   |   |   |   |   |   |   |   |   |   |   |   |   |   |   |   |   |   |   |   |   |   |   |   |   |   |   |   |   |   |   |   |   |   |   |   |   |   |   |   |   |   |   |   |   |   |   |   |   |   |   |   |   |   |   |   |   |   |   |   |   |   |   |   |   |   |   |   |   |   |   |   |   |   |   |   |   |   |   |   |   |   |   |   |   |   |   |   |   |   |   |   |   |   |   |   |   |   |   |   |   |   |   |   |   |   |   |   |   |   |   |   |   |   |   |   |   |   |   |   |   |   |   |   |   |   |   |   |   |   |   |   |   |   |   |   |   |   |   |   |   |   |   |   |   |   |   |   |   |   |   |   |   |   |   |   |   |   |   |   |   |   |   |   |   |   |   |   |   |   |   |   |   |   |   |   |   |   |   |   |   |   |   |   |   |   |   |   |   |   |   |   |   |   |   |   |   |   |   |   |   |   |   |   |   |   |   |   |   |   |   |   |   |   |   |   |   |   |   |   |   |   |   |   |   |   |   |   |   |   |   |   |   |   |   |   |   |   |   |   |   |   |   |   |   |   |   |   |   |   |   |   |   |   |   |   |   |   |   |   |   |   |   |   |   |   |   |   |   |   |   |   |   |   |   |   |   |   |   |   |   |   |   |   |   |   |   |   |   |   |   |   |   |   |   |   |   |   |   |   |   |   |   |   |   |   |   |   |   |   |   |   |   |   |   |   |   |   |   |   |   |   |   |   |   |   |   |   |   |   |   |   |   |   |   |   |   |   |   |   |   |   |   |   |   |   |   |   |   |   |   |   |   |   |   |   |   |   |   |   |   |   |   |   |   |   |   |   |   |   |   |   |   |   |   |   |   |   |   |   |   |   |   |   |   |   |   |   |   |   |   |   |   |   |   |   |   |   |   |   |   |   |   |   |   |   |   |   |   |   |   |   |   |   |   |   |   |   |   |   |   |   |   |   |   |   |   |   |   |   |   |   |   |   |   |   |   |   |   |   |   |   |   |   |   |   |   |   |   |   |   |   |   |   |   |   |   |   |   |   |   |   |   |   |   |   |   |   |   |   |   |   |   |   |   |   |   |   |   |   |   |   |   |   |   |   |   |   |   |   |   |   |   |   |   |   |   |   |   |   |   |   |   |   |   |   |   |   |   |   |   |   |   |   |   |   |   |   |   |   |   |   |   |   |   |   |   |   |   |   |   |   |   |   |   |   |   |   |   |   |   |   |   |   |   |   |   |   |   |   |   |   |   |   |   |   |   |   |   |   |   |   |   |   |   |   |   |   |   |   |   |   |   |   |   |   |   |   |   |   |   |   |   |   |   |   |   |   |   |   |   |   |   |   |   |   |   |   |   |   |   |   |   |   |   |   |   |   |   |   |   |   |   |   |   |   |   |   |   |   |   |   |   |   |   |   |   |   |   |   |   |   |   |   |   |   |   |   |   |
| SARS-CoV-2 NC_045512.2 | (8278)  | T     | AAC   | T     | ATATG | CT    | CACCT  | ATA   | ACAAAG  | TT       | G       | AAA         | CA    | TG   | ACAC | -C  | CG       | GT      | GAC | -CT    | TGGT  | GCT    | TGTAT | TGAC     | TG   | TAGT     | G       | CG     | CGT     | CATAT   | TAATG   | TCG   | CAG  | G     |     |    |      |       |    |     |   |   |   |   |   |   |   |   |   |   |   |   |   |   |   |   |   |   |   |   |   |   |   |   |   |   |   |   |   |   |   |   |   |   |   |   |   |   |   |   |   |   |   |   |   |   |   |   |   |   |   |   |   |   |   |   |   |   |   |   |   |   |   |   |   |   |   |   |   |   |   |   |   |   |   |   |   |   |   |   |   |   |   |   |   |   |   |   |   |   |   |   |   |   |   |   |   |   |   |   |   |   |   |   |   |   |   |   |   |   |   |   |   |   |   |   |   |   |   |   |   |   |   |   |   |   |   |   |   |   |   |   |   |   |   |   |   |   |   |   |   |   |   |   |   |   |   |   |   |   |   |   |   |   |   |   |   |   |   |   |   |   |   |   |   |   |   |   |   |   |   |   |   |   |   |   |   |   |   |   |   |   |   |   |   |   |   |   |   |   |   |   |   |   |   |   |   |   |   |   |   |   |   |   |   |   |   |   |   |   |   |   |   |   |   |   |   |   |   |   |   |   |   |   |   |   |   |   |   |   |   |   |   |   |   |   |   |   |   |   |   |   |   |   |   |   |   |   |   |   |   |   |   |   |   |   |   |   |   |   |   |   |   |   |   |   |   |   |   |   |   |   |   |   |   |   |   |   |   |   |   |   |   |   |   |   |   |   |   |   |   |   |   |   |   |   |   |   |   |   |   |   |   |   |   |   |   |   |   |   |   |   |   |   |   |   |   |   |   |   |   |   |   |   |   |   |   |   |   |   |   |   |   |   |   |   |   |   |   |   |   |   |   |   |   |   |   |   |   |   |   |   |   |   |   |   |   |   |   |   |   |   |   |   |   |   |   |   |   |   |   |   |   |   |   |   |   |   |   |   |   |   |   |   |   |   |   |   |   |   |   |   |   |   |   |   |   |   |   |   |   |   |   |   |   |   |   |   |   |   |   |   |   |   |   |   |   |   |   |   |   |   |   |   |   |   |   |   |   |   |   |   |   |   |   |   |   |   |   |   |   |   |   |   |   |   |   |   |   |   |   |   |   |   |   |   |   |   |   |   |   |   |   |   |   |   |   |   |   |   |   |   |   |   |   |   |   |   |   |   |   |   |   |   |   |   |   |   |   |   |   |   |   |   |   |   |   |   |   |   |   |   |   |   |   |   |   |   |   |   |   |   |   |   |   |   |   |   |   |   |   |   |   |   |   |   |   |   |   |   |   |   |   |   |   |   |   |   |   |   |   |   |   |   |   |   |   |   |   |   |   |   |   |   |   |   |   |   |   |   |   |   |   |   |   |   |   |   |   |   |   |   |   |   |   |   |   |   |   |   |   |   |   |   |   |   |   |   |   |   |   |   |   |   |   |   |   |   |   |   |   |   |   |   |   |   |   |   |   |   |   |   |   |   |   |   |   |   |   |   |   |   |   |   |   |   |   |   |   |   |   |   |   |   |   |   |   |   |   |   |   |   |   |   |   |   |   |   |   |   |   |   |   |   |   |   |   |   |   |   |   |   |   |   |   |   |   |   |   |   |   |   |   |   |   |   |   |   |   |   |   |   |   |   |   |   |   |   |   |   |   |   |   |   |   |   |   |   |   |   |   |   |   |   |   |   |   |   |   |   |   |   |   |   |   |   |   |   |   |   |   |   |   |   |   |   |   |   |   |   |   |   |   |   |   |   |   |   |   |   |   |   |   |   |   |   |   |   |   |   |   |   |   |   |   |   |   |   |   |   |   |   |   |   |   |   |   |   |   |   |   |   |   |   |   |   |   |   |   |   |   |   |   |   |   |   |   |   |   |   |   |   |   |   |   |   |   |   |   |   |   |   |   |   |   |   |   |   |   |   |   |   |   |   |   |   |   |   |   |   |   |   |   |   |   |   |   |   |   |   |   |   |   |   |   |   |   |   |   |   |   |   |   |   |   |   |   |   |   |   |   |   |   |   |   |   |   |   |   |   |   |   |   |   |   |   |   |   |   |   |   |   |   |   |   |   |   |   |   |   |   |   |   |   |   |   |   |   |   |   |   |   |   |   |   |   |   |   |   |   |   |   |   |   |   |   |   |   |   |   |   |   |   |   |   |
|                        |         |       |       |       |       |       |        |       |         |          |         | Section 131 |       |      |      |     |          |         |     |        |       |        |       |          |      |          |         |        |         |         |         |       |      |       |     |    |      |       |    |     |   |   |   |   |   |   |   |   |   |   |   |   |   |   |   |   |   |   |   |   |   |   |   |   |   |   |   |   |   |   |   |   |   |   |   |   |   |   |   |   |   |   |   |   |   |   |   |   |   |   |   |   |   |   |   |   |   |   |   |   |   |   |   |   |   |   |   |   |   |   |   |   |   |   |   |   |   |   |   |   |   |   |   |   |   |   |   |   |   |   |   |   |   |   |   |   |   |   |   |   |   |   |   |   |   |   |   |   |   |   |   |   |   |   |   |   |   |   |   |   |   |   |   |   |   |   |   |   |   |   |   |   |   |   |   |   |   |   |   |   |   |   |   |   |   |   |   |   |   |   |   |   |   |   |   |   |   |   |   |   |   |   |   |   |   |   |   |   |   |   |   |   |   |   |   |   |   |   |   |   |   |   |   |   |   |   |   |   |   |   |   |   |   |   |   |   |   |   |   |   |   |   |   |   |   |   |   |   |   |   |   |   |   |   |   |   |   |   |   |   |   |   |   |   |   |   |   |   |   |   |   |   |   |   |   |   |   |   |   |   |   |   |   |   |   |   |   |   |   |   |   |   |   |   |   |   |   |   |   |   |   |   |   |   |   |   |   |   |   |   |   |   |   |   |   |   |   |   |   |   |   |   |   |   |   |   |   |   |   |   |   |   |   |   |   |   |   |   |   |   |   |   |   |   |   |   |   |   |   |   |   |   |   |   |   |   |   |   |   |   |   |   |   |   |   |   |   |   |   |   |   |   |   |   |   |   |   |   |   |   |   |   |   |   |   |   |   |   |   |   |   |   |   |   |   |   |   |   |   |   |   |   |   |   |   |   |   |   |   |   |   |   |   |   |   |   |   |   |   |   |   |   |   |   |   |   |   |   |   |   |   |   |   |   |   |   |   |   |   |   |   |   |   |   |   |   |   |   |   |   |   |   |   |   |   |   |   |   |   |   |   |   |   |   |   |   |   |   |   |   |   |   |   |   |   |   |   |   |   |   |   |   |   |   |   |   |   |   |   |   |   |   |   |   |   |   |   |   |   |   |   |   |   |   |   |   |   |   |   |   |   |   |   |   |   |   |   |   |   |   |   |   |   |   |   |   |   |   |   |   |   |   |   |   |   |   |   |   |   |   |   |   |   |   |   |   |   |   |   |   |   |   |   |   |   |   |   |   |   |   |   |   |   |   |   |   |   |   |   |   |   |   |   |   |   |   |   |   |   |   |   |   |   |   |   |   |   |   |   |   |   |   |   |   |   |   |   |   |   |   |   |   |   |   |   |   |   |   |   |   |   |   |   |   |   |   |   |   |   |   |   |   |   |   |   |   |   |   |   |   |   |   |   |   |   |   |   |   |   |   |   |   |   |   |   |   |   |   |   |   |   |   |   |   |   |   |   |   |   |   |   |   |   |   |   |   |   |   |   |   |   |   |   |   |   |   |   |   |   |   |   |   |   |   |   |   |   |   |   |   |   |   |   |   |   |   |   |   |   |   |   |   |   |   |   |   |   |   |   |   |   |   |   |   |   |   |   |   |   |   |   |   |   |   |   |   |   |   |   |   |   |   |   |   |   |   |   |   |   |   |   |   |   |   |   |   |   |   |   |   |   |   |   |   |   |   |   |   |   |   |   |   |   |   |   |   |   |   |   |   |   |   |   |   |   |   |   |   |   |   |   |   |   |   |   |   |   |   |   |   |   |   |   |   |   |   |   |   |   |   |   |   |   |   |   |   |   |   |   |   |   |   |   |   |   |   |   |   |   |   |   |   |   |   |   |   |   |   |   |   |   |   |   |   |   |   |   |   |   |   |   |   |   |   |   |   |   |   |   |   |   |   |   |   |   |   |   |   |   |   |   |   |   |   |   |   |   |   |   |   |   |   |   |   |   |   |   |   |   |   |   |   |   |   |   |   |   |   |   |   |   |   |   |   |   |   |   |   |   |   |   |   |   |   |   |   |   |   |   |   |   |   |   |   |   |   |   |   |   |   |   |   |   |   |   |   |   |   |   |   |   |   |   |   |   |   |   |   |   |   |   |   |   |   |   |   |   |   |   |   |   |   |   |   |   |
|                        | (12611) | 12611 | 12620 | 12630 | 12640 | 12650 | 12660  | 12670 | 12680   | 12690    | 12707   |             |       |      |      |     |          |         |     |        |       |        |       |          |      |          |         |        |         |         |         |       |      |       |     |    |      |       |    |     |   |   |   |   |   |   |   |   |   |   |   |   |   |   |   |   |   |   |   |   |   |   |   |   |   |   |   |   |   |   |   |   |   |   |   |   |   |   |   |   |   |   |   |   |   |   |   |   |   |   |   |   |   |   |   |   |   |   |   |   |   |   |   |   |   |   |   |   |   |   |   |   |   |   |   |   |   |   |   |   |   |   |   |   |   |   |   |   |   |   |   |   |   |   |   |   |   |   |   |   |   |   |   |   |   |   |   |   |   |   |   |   |   |   |   |   |   |   |   |   |   |   |   |   |   |   |   |   |   |   |   |   |   |   |   |   |   |   |   |   |   |   |   |   |   |   |   |   |   |   |   |   |   |   |   |   |   |   |   |   |   |   |   |   |   |   |   |   |   |   |   |   |   |   |   |   |   |   |   |   |   |   |   |   |   |   |   |   |   |   |   |   |   |   |   |   |   |   |   |   |   |   |   |   |   |   |   |   |   |   |   |   |   |   |   |   |   |   |   |   |   |   |   |   |   |   |   |   |   |   |   |   |   |   |   |   |   |   |   |   |   |   |   |   |   |   |   |   |   |   |   |   |   |   |   |   |   |   |   |   |   |   |   |   |   |   |   |   |   |   |   |   |   |   |   |   |   |   |   |   |   |   |   |   |   |   |   |   |   |   |   |   |   |   |   |   |   |   |   |   |   |   |   |   |   |   |   |   |   |   |   |   |   |   |   |   |   |   |   |   |   |   |   |   |   |   |   |   |   |   |   |   |   |   |   |   |   |   |   |   |   |   |   |   |   |   |   |   |   |   |   |   |   |   |   |   |   |   |   |   |   |   |   |   |   |   |   |   |   |   |   |   |   |   |   |   |   |   |   |   |   |   |   |   |   |   |   |   |   |   |   |   |   |   |   |   |   |   |   |   |   |   |   |   |   |   |   |   |   |   |   |   |   |   |   |   |   |   |   |   |   |   |   |   |   |   |   |   |   |   |   |   |   |   |   |   |   |   |   |   |   |   |   |   |   |   |   |   |   |   |   |   |   |   |   |   |   |   |   |   |   |   |   |   |   |   |   |   |   |   |   |   |   |   |   |   |   |   |   |   |   |   |   |   |   |   |   |   |   |   |   |   |   |   |   |   |   |   |   |   |   |   |   |   |   |   |   |   |   |   |   |   |   |   |   |   |   |   |   |   |   |   |   |   |   |   |   |   |   |   |   |   |   |   |   |   |   |   |   |   |   |   |   |   |   |   |   |   |   |   |   |   |   |   |   |   |   |   |   |   |   |   |   |   |   |   |   |   |   |   |   |   |   |   |   |   |   |   |   |   |   |   |   |   |   |   |   |   |   |   |   |   |   |   |   |   |   |   |   |   |   |   |   |   |   |   |   |   |   |   |   |   |   |   |   |   |   |   |   |   |   |   |   |   |   |   |   |   |   |   |   |   |   |   |   |   |   |   |   |   |   |   |   |   |   |   |   |   |   |   |   |   |   |   |   |   |   |   |   |   |   |   |   |   |   |   |   |   |   |   |   |   |   |   |   |   |   |   |   |   |   |   |   |   |   |   |   |   |   |   |   |   |   |   |   |   |   |   |   |   |   |   |   |   |   |   |   |   |   |   |   |   |   |   |   |   |   |   |   |   |   |   |   |   |   |   |   |   |   |   |   |   |   |   |   |   |   |   |   |   |   |   |   |   |   |   |   |   |   |   |   |   |   |   |   |   |   |   |   |   |   |   |   |   |   |   |   |   |   |   |   |   |   |   |   |   |   |   |   |   |   |   |   |   |   |   |   |   |   |   |   |   |   |   |   |   |   |   |   |   |   |   |   |   |   |   |   |   |   |   |   |   |   |   |   |   |   |   |   |   |   |   |   |   |   |   |   |   |   |   |   |   |   |   |   |   |   |   |   |   |   |   |   |   |   |   |   |   |   |   |   |   |   |   |   |   |   |   |   |   |   |   |   |   |   |   |   |   |   |   |   |   |   |   |   |   |   |   |   |   |   |   |   |   |   |   |   |   |   |   |   |   |   |   |   |   |   |   |   |   |   |   |   |   |   |   |   |   |   |   |   |   |   |   |   |
| Ad 12 X73487           | (12060) | G     | T     | G     | T     | C     | AGGAAG | A     | T       | T        | A       | T           | A     | C    | A    | A   | A        | C       | T   | T      | C     | A      | G     | C        | G    | C        | T       | T      | G       | C       | G       | C     | T    | T     | A   | C  | T    | G     | A  | C   | C | C | G | A | T | T | A | C |   |   |   |   |   |   |   |   |   |   |   |   |   |   |   |   |   |   |   |   |   |   |   |   |   |   |   |   |   |   |   |   |   |   |   |   |   |   |   |   |   |   |   |   |   |   |   |   |   |   |   |   |   |   |   |   |   |   |   |   |   |   |   |   |   |   |   |   |   |   |   |   |   |   |   |   |   |   |   |   |   |   |   |   |   |   |   |   |   |   |   |   |   |   |   |   |   |   |   |   |   |   |   |   |   |   |   |   |   |   |   |   |   |   |   |   |   |   |   |   |   |   |   |   |   |   |   |   |   |   |   |   |   |   |   |   |   |   |   |   |   |   |   |   |   |   |   |   |   |   |   |   |   |   |   |   |   |   |   |   |   |   |   |   |   |   |   |   |   |   |   |   |   |   |   |   |   |   |   |   |   |   |   |   |   |   |   |   |   |   |   |   |   |   |   |   |   |   |   |   |   |   |   |   |   |   |   |   |   |   |   |   |   |   |   |   |   |   |   |   |   |   |   |   |   |   |   |   |   |   |   |   |   |   |   |   |   |   |   |   |   |   |   |   |   |   |   |   |   |   |   |   |   |   |   |   |   |   |   |   |   |   |   |   |   |   |   |   |   |   |   |   |   |   |   |   |   |   |   |   |   |   |   |   |   |   |   |   |   |   |   |   |   |   |   |   |   |   |   |   |   |   |   |   |   |   |   |   |   |   |   |   |   |   |   |   |   |   |   |   |   |   |   |   |   |   |   |   |   |   |   |   |   |   |   |   |   |   |   |   |   |   |   |   |   |   |   |   |   |   |   |   |   |   |   |   |   |   |   |   |   |   |   |   |   |   |   |   |   |   |   |   |   |   |   |   |   |   |   |   |   |   |   |   |   |   |   |   |   |   |   |   |   |   |   |   |   |   |   |   |   |   |   |   |   |   |   |   |   |   |   |   |   |   |   |   |   |   |   |   |   |   |   |   |   |   |   |   |   |   |   |   |   |   |   |   |   |   |   |   |   |   |   |   |   |   |   |   |   |   |   |   |   |   |   |   |   |   |   |   |   |   |   |   |   |   |   |   |   |   |   |   |   |   |   |   |   |   |   |   |   |   |   |   |   |   |   |   |   |   |   |   |   |   |   |   |   |   |   |   |   |   |   |   |   |   |   |   |   |   |   |   |   |   |   |   |   |   |   |   |   |   |   |   |   |   |   |   |   |   |   |   |   |   |   |   |   |   |   |   |   |   |   |   |   |   |   |   |   |   |   |   |   |   |   |   |   |   |   |   |   |   |   |   |   |   |   |   |   |   |   |   |   |   |   |   |   |   |   |   |   |   |   |   |   |   |   |   |   |   |   |   |   |   |   |   |   |   |   |   |   |   |   |   |   |   |   |   |   |   |   |   |   |   |   |   |   |   |   |   |   |   |   |   |   |   |   |   |   |   |   |   |   |   |   |   |   |   |   |   |   |   |   |   |   |   |   |   |   |   |   |   |   |   |   |   |   |   |   |   |   |   |   |   |   |   |   |   |   |   |   |   |   |   |   |   |   |   |   |   |   |   |   |   |   |   |   |   |   |   |   |   |   |   |   |   |   |   |   |   |   |   |   |   |   |   |   |   |   |   |   |   |   |   |   |   |   |   |   |   |   |   |   |   |   |   |   |   |   |   |   |   |   |   |   |   |   |   |   |   |   |   |   |   |   |   |   |   |   |   |   |   |   |   |   |   |   |   |   |   |   |   |   |   |   |   |   |   |   |   |   |   |   |   |   |   |   |   |   |   |   |   |   |   |   |   |   |   |   |   |   |   |   |   |   |   |   |   |   |   |   |   |   |   |   |   |   |   |   |   |   |   |   |   |   |   |   |   |   |   |   |   |   |   |   |   |   |   |   |   |   |   |   |   |   |   |   |   |   |   |   |   |   |   |   |   |   |   |   |   |   |   |   |   |   |   |   |   |   |   |   |   |   |   |   |   |   |   |   |   |   |   |   |   |   |   |   |   |   |   |   |   |   |   |   |   |   |   |   |   |   |   |   |   |   |   |   |   |   |   |   |   |   |   |   |   |   |
| SARS-CoV-2 NC_045512.2 | (8373)  | T     | A     | G     | C     | A     | AA     | AAGTC | A       | C        | A       | A           | C     | A    | T    | T   | G        | C       | T   | T      | G     | A      | T     | G        | A    | A        | G       | A      | T       | T       | C       | A     | T    | T     | G   | T  | C    | T     | G  | A   | A | A | A | A | A | A | A | A | A | A | A | A | A | A | A | A | A | A | A | A | A | A | A | A | A | A | A | A | A | A | A | A | A | A | A | A | A | A | A | A | A | A | A | A | A | A | A | A | A | A | A | A | A | A | A | A | A | A | A | A | A | A | A | A | A | A | A | A | A | A | A | A | A | A | A | A | A | A | A | A | A | A | A | A | A | A | A | A | A | A | A | A | A | A | A | A | A | A | A | A | A | A | A | A | A | A | A | A | A | A | A | A | A | A | A | A | A | A | A | A | A | A | A | A | A | A | A | A | A | A | A | A | A | A | A | A | A | A | A | A | A | A | A | A | A | A | A | A | A | A | A | A | A | A | A | A | A | A | A | A | A | A | A | A | A | A | A | A | A | A | A | A | A | A | A | A | A | A | A | A | A | A | A | A | A | A | A | A | A | A | A | A | A | A | A | A | A | A | A | A | A | A | A | A | A | A | A | A | A | A | A | A | A | A | A | A | A | A | A | A | A | A | A | A | A | A | A | A | A | A | A | A | A | A | A | A | A | A | A | A | A | A | A | A | A | A | A | A | A | A | A | A | A | A | A | A | A | A | A | A | A | A | A | A | A | A | A | A | A | A | A | A | A | A | A | A | A | A | A | A | A | A | A | A | A | A | A | A | A | A | A | A | A | A | A | A | A | A | A | A | A | A | A | A | A | A | A | A | A | A | A | A | A | A | A | A | A | A | A | A | A | A | A | A | A | A | A | A | A | A | A | A | A | A | A | A | A | A | A | A | A | A | A | A | A | A | A | A | A | A | A | A | A | A | A | A | A | A | A | A | A | A | A | A | A | A | A | A | A | A | A | A | A | A | A | A | A | A | A | A | A | A | A | A | A | A | A | A | A | A | A | A | A | A | A | A | A | A | A | A | A | A | A | A | A | A | A | A | A | A | A | A | A | A | A | A | A | A | A | A | A | A | A | A | A | A | A | A | A | A | A | A | A | A | A | A | A | A | A | A | A | A | A | A | A | A | A | A | A | A | A | A | A | A | A | A | A | A | A | A | A | A | A | A | A | A | A | A | A | A | A | A | A | A | A | A | A | A | A | A | A | A | A | A | A | A | A | A | A | A | A | A | A | A | A | A | A | A | A | A | A | A | A | A | A | A | A | A | A | A | A | A | A | A | A | A | A | A | A | A | A | A | A | A | A | A | A | A | A | A | A | A | A | A | A | A | A | A | A | A | A | A | A | A | A | A | A | A | A | A | A | A | A | A | A | A | A | A | A | A | A | A | A | A | A | A | A | A | A | A | A | A | A | A | A | A | A | A | A | A | A | A | A | A | A | A | A | A | A | A | A | A | A | A | A | A | A | A | A | A | A | A | A | A | A | A | A | A | A | A | A | A | A | A | A | A | A | A | A | A | A | A | A | A | A | A | A | A | A | A | A | A | A | A | A | A | A | A | A | A | A | A | A | A | A | A | A | A | A | A | A | A | A | A | A | A | A | A | A | A | A | A | A | A | A | A | A | A | A | A | A | A | A | A | A | A | A | A | A | A | A | A | A | A | A | A | A | A | A | A | A | A | A | A | A | A | A | A | A | A | A | A | A | A | A | A | A | A | A | A | A | A | A | A | A | A | A | A | A | A | A | A | A | A | A | A | A | A | A | A | A | A | A | A | A | A | A | A | A | A | A | A | A | A | A | A | A | A | A | A | A | A | A | A | A | A | A | A | A | A | A | A | A | A | A | A | A | A | A | A | A | A | A | A | A | A | A | A | A | A | A | A | A | A | A | A | A | A | A | A | A | A | A | A | A | A | A | A | A | A | A | A | A | A | A | A | A | A | A | A | A | A | A | A | A | A | A | A | A | A | A | A | A | A | A | A | A | A | A | A | A | A | A | A | A | A | A | A | A | A | A | A | A | A | A | A | A | A | A | A | A | A | A | A | A | A | A | A | A | A | A | A | A | A | A | A | A | A | A | A | A | A | A | A | A | A | A | A | A | A | A | A | A | A | A | A | A | A | A | A | A | A | A | A | A | A | A | A | A | A | A | A | A | A | A | A | A | A | A | A | A | A | A | A | A |

SARS-CoV-2 & Ad12.apr

|                        |         |         |           |              |            |              |             |            |              |             |              |               |              |          |        |          |         |         |         |        |    |        |     |        |
|------------------------|---------|---------|-----------|--------------|------------|--------------|-------------|------------|--------------|-------------|--------------|---------------|--------------|----------|--------|----------|---------|---------|---------|--------|----|--------|-----|--------|
|                        |         |         |           |              |            |              |             |            |              |             | Section 134  |               |              |          |        |          |         |         |         |        |    |        |     |        |
|                        | (12902) | 12902   | 12910     | 12920        | 12930      | 12940        | 12950       | 12960      | 12970        | 12980       | 12998        |               |              |          |        |          |         |         |         |        |    |        |     |        |
| Ad 12 X73487           | (12333) | -GTTTAA | GTCGAGATT | CATACCTGGGTC | ACTTAGT    | TACTTTGTACC  | GC-GAAGCCAT | TGGTCAAG   | CGCAGGTAGAC  | GAA-CAA-ACT | TATC-AAGAA   |               |              |          |        |          |         |         |         |        |    |        |     |        |
| SARS-CoV-2 NC_045512.2 | (8652)  | TGTCATA | ACATACTGA | CTTTCAAGTGA  | AATCA--    | TAGGATACAAAG | GCTATTGATGG | TGGTGTCA   | CTCGTGACATAG | CATCTACAGA  | TACTTGTTTT   |               |              |          |        |          |         |         |         |        |    |        |     |        |
|                        |         |         |           |              |            |              |             |            |              |             | Section 135  |               |              |          |        |          |         |         |         |        |    |        |     |        |
|                        | (12999) | 12999   | 13010     | 13020        | 13030      | 13040        | 13050       | 13060      | 13070        | 13080       | 13095        |               |              |          |        |          |         |         |         |        |    |        |     |        |
| Ad 12 X73487           | (12425) | ATAAC   | CAGTGT    | TAGTCGCGCA   | --CTGGGC   | CAGGAGGACAC  | TGSCAGTTTA  | GAGGCCAC   | ACTTAAC      | TTTTACTTA   | ACTAACCGTCG  | CCAGCAAGGTGCC |              |          |        |          |         |         |         |        |    |        |     |        |
| SARS-CoV-2 NC_045512.2 | (8747)  | GCTAACA | -----     | ACATGCTGA    | ATTTTGACA  | CATG         | GTTTAGCAG   | -----      | CGTGGTGGT    | AGTTA--     | TACTAA-TGACA | AAAGCTG       | CCATT--GA--T |          |        |          |         |         |         |        |    |        |     |        |
|                        |         |         |           |              |            |              |             |            |              |             | Section 136  |               |              |          |        |          |         |         |         |        |    |        |     |        |
|                        | (13096) | 13096   | 13110     | 13120        | 13130      | 13140        | 13150       | 13160      | 13170        | 13180       | 13192        |               |              |          |        |          |         |         |         |        |    |        |     |        |
| Ad 12 X73487           | (12520) | TCCT    | CAGTAC    | CTTTAAAT     | GCGGAAGAAG | -AACGCAT     | TATGCGCTAT  | GTACAGCAAT | CTGTAG       | TTTGTAT     | CTTATGCGTGAG | GGTGCACACCC   | CAG          |          |        |          |         |         |         |        |    |        |     |        |
| SARS-CoV-2 NC_045512.2 | (8827)  | TGCT--  | GAGTCAT   | AACAAG       | ---A-GAAG  | TGGGTTT      | TGTCGTG     | CTGTTGC    | TGGC         | ACGATAT     | TTACGCACA    | -ACTAATG--    | GTGAC        | TTTTTTG  | CAT    |          |         |         |         |        |    |        |     |        |
|                        |         |         |           |              |            |              |             |            |              |             | Section 137  |               |              |          |        |          |         |         |         |        |    |        |     |        |
|                        | (13193) | 13193   | 13200     | 13210        | 13220      | 13230        | 13240       | 13250      | 13260        | 13270       | 13289        |               |              |          |        |          |         |         |         |        |    |        |     |        |
| Ad 12 X73487           | (12616) | TGCGC   | CTAGACA   | TGACAGCGC    | GCAATAT    | GGA---G      | CGTCCTT     | CTAGG-CTT  | CCAA         | TGAGCTTT    | CATTAA       | TCGTTGATGG    | ATTAC        | CTT      | CACC   |          |         |         |         |        |    |        |     |        |
| SARS-CoV-2 NC_045512.2 | (8915)  | TTCTTA  | CCTAGAG   | TTTTAG--     | TGCA       | GTGTG        | TAACAT      | CTGT       | TACAGAC      | CCATCAAA    | ACTTAT       | AGAGTAC       | ACTG         | ACT--TTG | CAAC   | ATCAGCTT | ----G   |         |         |        |    |        |     |        |
|                        |         |         |           |              |            |              |             |            |              |             | Section 138  |               |              |          |        |          |         |         |         |        |    |        |     |        |
|                        | (13290) | 13290   | 13300     | 13310        | 13320      | 13330        | 13340       | 13350      | 13360        | 13370       | 13386        |               |              |          |        |          |         |         |         |        |    |        |     |        |
| Ad 12 X73487           | (12709) | CGCTGC  | GGC       | CA           | TGAACGGG   | GAATAC       | TT--TACAA   | ATGC       | AATTTCTAA    | ATCCG       | CATTGGT      | TGCC          | CCCTCC       | TGGAT    | TTTTAC | ACTGG    | TGAATTT | GATTTGC |         |        |    |        |     |        |
| SARS-CoV-2 NC_045512.2 | (9004)  | TGTTTT  | GGC--     | TGCTGA       | ATGTAC     | AATTTT       | TAAAG       | ATGCTTC    | TGGTAAG      | C--AG--     | TACC         | ATATGT        | -TATG--      | ATAC     | CAATGT | ACTAG    | AGGTT   |         |         |        |    |        |     |        |
|                        |         |         |           |              |            |              |             |            |              |             | Section 139  |               |              |          |        |          |         |         |         |        |    |        |     |        |
|                        | (13387) | 13387   | 13400     | 13410        | 13420      | 13430        | 13440       | 13450      | 13460        | 13470       | 13483        |               |              |          |        |          |         |         |         |        |    |        |     |        |
| Ad 12 X73487           | (12804) | CGGAA   | GGAATGA   | TGGCTTT      | TTTGTGG    | -GATGAT      | GTTAC       | GGA        | CAGTCTG      | TTTAG       | TCGAG        | TTATT         | GGA          | CA       | CCATG  | GGTAA    | -AAAGG  | AA---GC | AGGT    |        |    |        |     |        |
| SARS-CoV-2 NC_045512.2 | (9090)  | CTGTT   | GCTTATGA  | AAAGTTT      | ACGCC      | CTGACAC      | ACGTTAT     | GTG        | CTCA---      | TGGATGG     | CTCTA        | TTATT         | ---          | CAATT    | TCC    | TAA      | -ACCT   | ACCTT   | GAAGGT  |        |    |        |     |        |
|                        |         |         |           |              |            |              |             |            |              |             | Section 140  |               |              |          |        |          |         |         |         |        |    |        |     |        |
|                        | (13484) | 13484   | 13490     | 13500        | 13510      | 13520        | 13530       | 13540      | 13550        | 13560       | 13570        | 13580         |              |          |        |          |         |         |         |        |    |        |     |        |
| Ad 12 X73487           | (12896) | G--AT   | GAAG      | GT           | C--CCTT    | G            | ACTCTC      | TCGGGC     | GAGT         | TTCT----    | CA           | TTC           | CC           | AGT      | TTAA   | CTAG     | TTTACC  | CGCCAG  | GTGTTAA | AG     | C  | GGT    | CGT | TACCAC |
| SARS-CoV-2 NC_045512.2 | (9179)  | TCTGT   | TTAGA     | GTGG         | TAA        | CAAA         | CTTTGAT     | TCT---     | GAGT         | ACTGTAGG    | CA           | CGG           | CA           | CTTG     | TGAA   | AGATC    | AGAAG   | CTGGT   | GT      | TTGTGT | AT | CTACTA | --  | GTGG   |

SARS-CoV-2 & Ad12.apr

[illegible]

SARS-CoV-2 & Ad12.apr

Genomic alignment of SARS-CoV-2 NC\_045512.2 with Ad 12 X73487 across five sections (148-154). The alignment shows high sequence identity with some mismatches highlighted in red. Section 148 (14260-14356) shows a deletion in the SARS-CoV-2 sequence. Section 149 (14357-14453) shows a deletion in the SARS-CoV-2 sequence. Section 150 (14454-14550) shows a deletion in the SARS-CoV-2 sequence. Section 151 (14551-14647) shows a deletion in the SARS-CoV-2 sequence. Section 152 (14648-14744) shows a deletion in the SARS-CoV-2 sequence. Section 153 (14745-14841) shows a deletion in the SARS-CoV-2 sequence. Section 154 (14842-14938) shows a deletion in the SARS-CoV-2 sequence.

SARS-CoV-2 & Ad12.apr

|                                |                      |       |       |       |       |       |       |       |       |       |             |
|--------------------------------|----------------------|-------|-------|-------|-------|-------|-------|-------|-------|-------|-------------|
|                                |                      |       |       |       |       |       |       |       |       |       | Section 155 |
| (14939)                        | 14939                | 14950 | 14960 | 14970 | 14980 | 14990 | 15000 | 15010 | 15020 | 15035 |             |
| Ad 12 X73487 (14271)           | -----GAGGA-----      | GA    | GA    | GA    | GA    | GA    | GA    | GA    | GA    | GA    |             |
| SARS-CoV-2 NC_045512.2 (10495) | TGTTGGTTTAAACATA     | GA    | TA    | TG    | ACT   | GT    | CT    | CT    | TT    | AA    | AT          |
|                                |                      |       |       |       |       |       |       |       |       |       | Section 156 |
| (15036)                        | 15036                | 15050 | 15060 | 15070 | 15080 | 15090 | 15100 | 15110 | 15120 | 15132 |             |
| Ad 12 X73487 (14304)           | -----CTAGGA          | TT    | GA    | AC    | CG    | GT    | TT    | GA    | AA    | CA    |             |
| SARS-CoV-2 NC_045512.2 (10592) | AACTTTTATGGACCTTTTGT | TG    | AC    | AG    | GC    | AA    | CA    | GC    | AC    | AA    | CA          |
|                                |                      |       |       |       |       |       |       |       |       |       | Section 157 |
| (15133)                        | 15133                | 15140 | 15150 | 15160 | 15170 | 15180 | 15190 | 15200 | 15210 | 15229 |             |
| Ad 12 X73487 (14365)           | AAAAAA               | TACT  | AA    | AT    | AT    | CG    | CAG   | CT    | GG    | TA    | TT          |
| SARS-CoV-2 NC_045512.2 (10689) | TT                   | AT    | AA    | AT    | GG    | AG    | AC    | AG    | GT    | GG    | TT          |
|                                |                      |       |       |       |       |       |       |       |       |       | Section 158 |
| (15230)                        | 15230                | 15240 | 15250 | 15260 | 15270 | 15280 | 15290 | 15300 | 15310 | 15326 |             |
| Ad 12 X73487 (14460)           | TAA                  | AC    | AG    | G     | CGG   | CT    | CC    | GA    | ACA   | G     | GT          |
| SARS-CoV-2 NC_045512.2 (10781) | AC                   | ACA   | AG    | A     | ----- | CC    | AT    | GT    | T     | G     | AC          |
|                                |                      |       |       |       |       |       |       |       |       |       | Section 159 |
| (15327)                        | 15327                | 15340 | 15350 | 15360 | 15370 | 15380 | 15390 | 15400 | 15410 | 15423 |             |
| Ad 12 X73487 (14555)           | G                    | T     | AG    | TG    | CAG   | CAG   | A     | ATT   | AC    | TG    | ---         |
| SARS-CoV-2 NC_045512.2 (10870) | G                    | CA    | AAA   | TG    | GT    | AT    | GA    | AT    | GG    | AC    | GT          |
|                                |                      |       |       |       |       |       |       |       |       |       | Section 160 |
| (15424)                        | 15424                | 15430 | 15440 | 15450 | 15460 | 15470 | 15480 | 15490 | 15500 | 15510 | 15520       |
| Ad 12 X73487 (14647)           | TACG                 | ---   | CG    | CGT   | GT    | TT    | AA    | T     | CG    | TT    | TCC         |
| SARS-CoV-2 NC_045512.2 (10964) | ACT                  | TT    | CA    | AAA   | GT    | GC    | AG    | T     | G     | AAA   | AG          |
|                                |                      |       |       |       |       |       |       |       |       |       | Section 161 |
| (15521)                        | 15521                | 15530 | 15540 | 15550 | 15560 | 15570 | 15580 | 15590 | 15600 | 15617 |             |
| Ad 12 X73487 (14734)           | C                    | ---   | GC    | CTT   | AC    | AG    | A     | T     | C     | AC    | GG          |
| SARS-CoV-2 NC_045512.2 (11061) | AAT                  | GGT   | CTT   | TG    | TT    | CT    | T     | T     | T     | T     | T           |

SARS-CoV-2 & Ad12.apr

|                                |                                                                                                      |       |       |       |       |       |       |       |       |             |
|--------------------------------|------------------------------------------------------------------------------------------------------|-------|-------|-------|-------|-------|-------|-------|-------|-------------|
|                                |                                                                                                      |       |       |       |       |       |       |       |       | Section 162 |
| (15618)                        | 15618                                                                                                | 15630 | 15640 | 15650 | 15660 | 15670 | 15680 | 15690 | 15700 | 15714       |
| Ad 12 X73487 (14818)           | GAC-----CTGTCCTACGTTTACAAAGCACTGGGCATAGTTCTCCACGAGTGCTTTCTAGTGCACATTTTAAAAAAGTGTGGTAACATGTC          |       |       |       |       |       |       |       |       |             |
| SARS-CoV-2 NC_045512.2 (11158) | TAGCATGCATTCTCTGTTTGTGTTACTCTCTGCCACTGTAGCTTATTTTAAATATGTGCTA--TATGCCTGCTAGTGTGGTGTATGCGTA           |       |       |       |       |       |       |       |       |             |
|                                |                                                                                                      |       |       |       |       |       |       |       |       | Section 163 |
| (15715)                        | 15715                                                                                                | 15720 | 15730 | 15740 | 15750 | 15760 | 15770 | 15780 | 15790 | 15811       |
| Ad 12 X73487 (14907)           | CA---TTTGGTTTCGCCAAGTAAACAACACGGGCTGGGACTGGGTGCCGCCCGCA-----TGTATGGAGGAGCTAAACAAGGTCTAGC             |       |       |       |       |       |       |       |       |             |
| SARS-CoV-2 NC_045512.2 (11253) | TTATGACA TGGTTGGATATGTGTGATAC--T--AGTTTGTCTGGTTTAAAGCTAAAGAACTGTGTGTTATGTATGCAATCAGCTGTAAAA--GTGTTAC |       |       |       |       |       |       |       |       |             |
|                                |                                                                                                      |       |       |       |       |       |       |       |       | Section 164 |
| (15812)                        | 15812                                                                                                | 15820 | 15830 | 15840 | 15850 | 15860 | 15870 | 15880 | 15890 | 15908       |
| Ad 12 X73487 (14989)           | CAA-CATCCAGTGCAGGTACGGACATTAACGAGCTCCATGGGG-CG-CGCATACCCGA-GGACGCAC TGG--TCGCACCACCTGTAGACGATGTTA    |       |       |       |       |       |       |       |       |             |
| SARS-CoV-2 NC_045512.2 (11340) | TAAATCTTATGACA GCAAGAACTGTGTATGATGATGGTGCTAGGAGAGTGTGGACACTTAT--G--AATGTCTTGACACTCGTTATAAA-AGT TTA   |       |       |       |       |       |       |       |       |             |
|                                |                                                                                                      |       |       |       |       |       |       |       |       | Section 165 |
| (15909)                        | 15909                                                                                                | 15920 | 15930 | 15940 | 15950 | 15960 | 15970 | 15980 | 15990 | 16005       |
| Ad 12 X73487 (15080)           | TTGA-CTCGGTAGTGGCCGATGCTCGCAAGTACCGCGCGCCGGCTGAACAGCAGGGTCTACTGTGTATGCAGTAATTGATGAG-----GTAGTGG      |       |       |       |       |       |       |       |       |             |
| SARS-CoV-2 NC_045512.2 (11431) | TTATGGT-AAATGCTTTAG--ATCAAGGCATTTCCATGTGGGCTCTATAA--TCTCTGTACTTCTAACTACTCAAGGTGTAGTTACAACGTCACTGT    |       |       |       |       |       |       |       |       |             |
|                                |                                                                                                      |       |       |       |       |       |       |       |       | Section 166 |
| (16006)                        | 16006                                                                                                | 16020 | 16030 | 16040 | 16050 | 16060 | 16070 | 16080 | 16090 | 16102       |
| Ad 12 X73487 (15170)           | CAAACGCGCGGGCTTATGCA-----GCGCCGAGACGCGCTG---CGTCGC---GGCGTAGACCAACAC--CGCCATGCGCGCGGCCAGAG--C        |       |       |       |       |       |       |       |       |             |
| SARS-CoV-2 NC_045512.2 (11523) | TTTTGGCAGAGGTATGTTTTTATGTGTGTTGAGTATTGCCCTATTTTCTTCTATAACTGGTAATACACCTTCAGTGTATAATGCTAGTTTATTGTTT    |       |       |       |       |       |       |       |       |             |
|                                |                                                                                                      |       |       |       |       |       |       |       |       | Section 167 |
| (16103)                        | 16103                                                                                                | 16110 | 16120 | 16130 | 16140 | 16150 | 16160 | 16170 | 16180 | 16199       |
| Ad 12 X73487 (15252)           | GTTGGTTTCGACGGGCCAGGCG---CATTTGGGCGGG--CGAGCTA--TGATGCGGGCAGCC-----AGG-CGGGCTG-C---AACGCC---TGCC-    |       |       |       |       |       |       |       |       |             |
| SARS-CoV-2 NC_045512.2 (11620) | CTTAGGCTATTTTTTGTACTTGTACTTTGGCTCTTTTGTGTTACTCAACCG--CTACTTTAGACTGACTCTTGGTGTTTATGATTACCTTAGTTTCTA   |       |       |       |       |       |       |       |       |             |
|                                |                                                                                                      |       |       |       |       |       |       |       |       | Section 168 |
| (16200)                        | 16200                                                                                                | 16210 | 16220 | 16230 | 16240 | 16250 | 16260 | 16270 | 16280 | 16296       |
| Ad 12 X73487 (15325)           | ----GGTCGAGC-----GCGGAGAC-GGGCGGCAGCTGCGGC CGCAACAGCTA--TTG-----CAAACCTAGCTGCTCCGCGACGAGGAAATGTAT    |       |       |       |       |       |       |       |       |             |
| SARS-CoV-2 NC_045512.2 (11715) | CACAGGAGTTTAGATATATGAATTCACA GGGACTACTCCACCCAAGAAATAGCATAGATGCCCTTCAAAC-TCAACATTAAATTGTTGGTGTGTTG    |       |       |       |       |       |       |       |       |             |



SARS-CoV-2 & Ad12.apr

|                                |         |       |           |       |           |                |         |        |          |         | Section 169                                                |                                                          |                                                |
|--------------------------------|---------|-------|-----------|-------|-----------|----------------|---------|--------|----------|---------|------------------------------------------------------------|----------------------------------------------------------|------------------------------------------------|
|                                | (16297) | 16297 | 16310     | 16320 | 16330     | 16340          | 16350   | 16360  | 16370    | 16380   | 16393                                                      |                                                          |                                                |
| Ad 12 X73487 (15404)           |         | A     | CTGGGTGC  | GCGA  | CTCAGTGA  | CCGG-GACGC     | GTGT    | -----  | GC       | CAGTT   | CGTACGCGTCCACCTC-ACCCTTAGA-----AGACAAAG--AGT--GACT         |                                                          |                                                |
| SARS-CoV-2 NC_045512.2 (11811) |         | G     | CAAACCTTT | GTAT  | CAAAGTAG  | CCACT          | GTACA   | GTCT   | AAAAATGT | CAGAT   | GTAAAGTGCACATCAGTAGTCTTA                                   | CTCTCAGTTTTGCAACAACCTCAGAGT                              |                                                |
|                                |         |       |           |       |           |                |         |        |          |         | Section 170                                                |                                                          |                                                |
|                                | (16394) | 16394 | 16400     | 16410 | 16420     | 16430          | 16440   | 16450  | 16460    | 16470   | 16480                                                      | 16490                                                    |                                                |
| Ad 12 X73487 (15485)           |         | CA    | ATGTC     | TGT   | TATGTAT   | -----          | GC      | CCAGC  | -----    | ATGAC   | CAAACGCA                                                   | AGTTCAAAGAAAGAGCTGCTGCAGGCCTTAGCGCCTGAAAT                |                                                |
| SARS-CoV-2 NC_045512.2 (11908) |         | AG    | AATCA     | TCA   | TCTAAAT   | TGTGGGCTCAATGT | GT      | CCAG   | TTACACA  | ATGAC   | ATTCTCTT                                                   | AGCT---AAAGATACTACTGAAG-CCTTTGAAAAATGGT                  |                                                |
|                                |         |       |           |       |           |                |         |        |          |         | Section 171                                                |                                                          |                                                |
|                                | (16491) | 16491 | 16500     | 16510 | 16520     | 16530          | 16540   | 16550  | 16560    | 16570   | 16587                                                      |                                                          |                                                |
| Ad 12 X73487 (15562)           |         | A     | TATGGC    | CCA   | TCGGATAAC | CTTACCA        | AGCGC   | GAT    | ATCAAGCA | TGTTAA  | AAAACGGG--                                                 | AAAAAAAGAAGGAAGAAGT                                      |                                                |
| SARS-CoV-2 NC_045512.2 (12001) |         | T     | CACTA     | CTT   | TCTGTTT   | TG             | CTTCCA  | TGAGGT | GCTGTAG  | ACATA   | AAACAAAGCTTTGTG                                            | AAAGAAATGCTGGA-----CAACAGGGCAACCTTACAA                   |                                                |
|                                |         |       |           |       |           |                |         |        |          |         | Section 172                                                |                                                          |                                                |
|                                | (16588) | 16588 | 16600     | 16610 | 16620     | 16630          | 16640   | 16650  | 16660    | 16670   | 16684                                                      |                                                          |                                                |
| Ad 12 X73487 (15656)           |         | G     | GCGTC     | AGTT  | TGTGCGT   | CA             | TTTG    | CG--   | CC       | CAGACGT | AGGGTACAGTGGAGAGGACGGCAAGTAA--ACGCATTTTTCGACCCGGGCACCAACAG |                                                          |                                                |
| SARS-CoV-2 NC_045512.2 (12092) |         | G     | CTAT      | --    | AGCC      | TCAGAGTT       | TAGTT   | CCCTT  | CC       | ATCAT   | ATATGCAG                                                   | CTTTTGCTACTGCTCAAGAAAGCTTATGAGCAGGCTGTTGCTAAT--GGTG-ATTC |                                                |
|                                |         |       |           |       |           |                |         |        |          |         | Section 173                                                |                                                          |                                                |
|                                | (16685) | 16685 | 16690     | 16700 | 16710     | 16720          | 16730   | 16740  | 16750    | 16760   | 16781                                                      |                                                          |                                                |
| Ad 12 X73487 (15747)           |         | T     | GTTT      | TTT   | TCTCCCGG  | AGAGC          | GAA     | CGA    | TTATG    | CGT     | CCCCTAA                                                    | AGCGCAGTACGACGAAGTGTACGCAGACGATGACATTTTGGAAGCAAGCGGCA    |                                                |
| SARS-CoV-2 NC_045512.2 (12184) |         | T     | GAAG      | TTGT  | TCTTAAA   | AGTT           | GAA     | GAA    | G---     | TCTT    | ---TG--                                                    | AATGTGGCTA-----AATCTGAATTGACCGT---GATGCAAGCATGCA         |                                                |
|                                |         |       |           |       |           |                |         |        |          |         | Section 174                                                |                                                          |                                                |
|                                | (16782) | 16782 | 16790     | 16800 | 16810     | 16820          | 16830   | 16840  | 16850    | 16860   | 16878                                                      |                                                          |                                                |
| Ad 12 X73487 (15844)           |         | A     | CAGACT    | -G    | GGGA      | AATTT          | G       | CATATG | GA       | A--     | AAAAAGG                                                    | CGTTACGGAGACAAAATTGCTATTCTTTGGACGAGGAAATCAAAC--AC        |                                                |
| SARS-CoV-2 NC_045512.2 (12259) |         | A     | CGTA      | AAGTT | GGAA      | --AA           | GATGGCT | GATC   | AA       | GCTAT   | GACCA                                                      | AAATGTATAAA                                              | CAGGCTAGCTATTGAGGACAGAGG--GCAAAAGTTACTAGTGCTAT |
|                                |         |       |           |       |           |                |         |        |          |         | Section 175                                                |                                                          |                                                |
|                                | (16879) | 16879 | 16890     | 16900 | 16910     | 16920          | 16930   | 16940  | 16950    | 16960   | 16975                                                      |                                                          |                                                |
| Ad 12 X73487 (15937)           |         | G     | GCTGTC    | A--   | CTTT      | GCA            | CAAG    | TGTT   | G        | CCCGTCC | TTGG                                                       | GCCTTCGGAAGAAAAGCGTGGAATTAAAAGGGAAGCCATGGATGAAT          |                                                |
| SARS-CoV-2 NC_045512.2 (12352) |         | G     | CAGACA    | ATG   | CTTT      | TCA            | CTAT    | GCT    | TAG      | ---AAAG | TTGG                                                       | ATAATGATGCACTCAACAA--CATTATCAACAATGCAGAGATGGTTGTGTTCC    | -TTG                                           |

SARS-CoV-2 & Ad12.apr

|                                |                |             |                |               |              |             |             |             |                    |                                   |                         |                     |                   |
|--------------------------------|----------------|-------------|----------------|---------------|--------------|-------------|-------------|-------------|--------------------|-----------------------------------|-------------------------|---------------------|-------------------|
|                                |                |             |                |               |              |             |             |             |                    | Section 176                       |                         |                     |                   |
| (16976)                        | 16976          | 16990       | 17000          | 17010         | 17020        | 17030       | 17040       | 17050       | 17060              | 17072                             |                         |                     |                   |
| Ad 12 X73487 (16032)           | TGCA----       | ACTGATGGTGC | CTAAGCGGC      | AAAGTTAGAGGAC | GTACTAGAGC   | ACATGAAGG   | TGG--AT-    | CTAGCGTACAG | CCAGATGTAAAAGTA    |                                   |                         |                     |                   |
| SARS-CoV-2 NC_045512.2 (12443) | AAACA          | TAA         | TAC            | CTCTTACAA     | CAGCAGCCA    | AACTAA      | TGTTGTCA    | TACAGACTATA | ACACATATA          | AAAAATACGTGTGATGGTACAACATTACTTATG |                         |                     |                   |
|                                |                |             |                |               |              |             |             |             |                    | Section 177                       |                         |                     |                   |
| (17073)                        | 17073          | 17080       | 17090          | 17100         | 17110        | 17120       | 17130       | 17140       | 17150              | 17169                             |                         |                     |                   |
| Ad 12 X73487 (16121)           | CGTCCGATAAAAAA | GGTAGCTCCA  | AGG--ATTGGGAGT | TCAAACAGT     | GGAC--ATTCAA | ATTCC       | -----GTGCAA | AC          | TGCATTGGGT         | -----G                            |                         |                     |                   |
| SARS-CoV-2 NC_045512.2 (12540) | CATCAGCAT--TGT | GGGAAATCCA  | ACAGGTTGTAGAT  | TGCAGATAGT    | AAATTGTTCAA  | CTTAGT      | GAAATTA     | GTATGGAC    | AATTCACCTAATTTAGC- |                                   |                         |                     |                   |
|                                |                |             |                |               |              |             |             |             |                    | Section 178                       |                         |                     |                   |
| (17170)                        | 17170          | 17180       | 17190          | 17200         | 17210        | 17220       | 17230       | 17240       | 17250              | 17266                             |                         |                     |                   |
| Ad 12 X73487 (16200)           | AAACTATGGAAAT  | TCCAAAC--TT | CGCCAATA       | AAAAACAA      | CGGTGA       | ----AC      | GCAAGCGTG   | CAAACAGAC   | CCTTGGTAC          | CCGCCAGTGCTTTC                    | AACA--                  |                     |                   |
| SARS-CoV-2 NC_045512.2 (12634) | ATGGCC         | TCTTAT      | TGTAA          | CAGCTT        | TAAGGGCC     | AAATG       | TGTTGTCA    | AAATTACAGAA | TAGCTTAGT-         | CCTGTTGCACTACGACAGATG             | TCTTGTGC                |                     |                   |
|                                |                |             |                |               |              |             |             |             |                    | Section 179                       |                         |                     |                   |
| (17267)                        | 17267          | 17280       | 17290          | 17300         | 17310        | 17320       | 17330       | 17340       | 17350              | 17363                             |                         |                     |                   |
| Ad 12 X73487 (16289)           | -----AAAAAA    | AGCGTC      | -----          | -----         | -----        | -----       | -----       | -----       | -----              | -----                             |                         |                     |                   |
| SARS-CoV-2 NC_045512.2 (12730) | TGCCGGT        | ACTAC       | CAAACT         | GTCTTGCACT    | GATGACAAT    | TGCGTTAGCTT | ACTACAGAC   | AAACAGTTC   | GCTTTTGCCAGAC      | TACGTTT                           | TACAT                   |                     |                   |
|                                |                |             |                |               |              |             |             |             |                    | Section 180                       |                         |                     |                   |
| (17364)                        | 17364          | 17370       | 17380          | 17390         | 17400        | 17410       | 17420       | 17430       | 17440              | 17450                             | 17460                   |                     |                   |
| Ad 12 X73487 (16346)           | CC             | TTCCATTGTG  | CCCCACGCC      | TGGGTACC      | GTGGGACAA    | CTTTTCAG    | CGCCGAGC    | CACAGCCC    | CTAGCCG            | TAGACGAGGTCC                      | ATCACGCCGTAGACGT        |                     |                   |
| SARS-CoV-2 NC_045512.2 (12826) | TTTACAGGA      | -----TT     | TGAAATGG       | GCTAGATT      | CTTAAGAGT    | GATGGAAC    | TGGT--AC    | TATCTATACAG | ACTGGAAC           | CACCTTGTAGGTTTG                   |                         |                     |                   |
|                                |                |             |                |               |              |             |             |             |                    | Section 181                       |                         |                     |                   |
| (17461)                        | 17461          | 17470       | 17480          | 17490         | 17500        | 17510       | 17520       | 17530       | 17540              | 17557                             |                         |                     |                   |
| Ad 12 X73487 (16443)           | GACGCA         | AAGCACTTT   | AGCCCCAGCGG    | --CAGTA       | CGTCGCGTT    | GTACAAAGGGG | GC-GC       | ACACTAATAC  | TTCCATCC           | GTGCGTTAC                         | CACCC                   | TAGCAT              |                   |
| SARS-CoV-2 NC_045512.2 (12912) | TTACAG         | ACA         | CACCTAA        | AGGTCC        | TAAAGTGA     | AGTATT      | TATAC       | TTATTA      | ----AAG            | GATTAAACAA                        | ACC--TAAATAGAGGTATGGTAC | TTGGTAGTTT          |                   |
|                                |                |             |                |               |              |             |             |             |                    | Section 182                       |                         |                     |                   |
| (17558)                        | 17558          | 17570       | 17580          | 17590         | 17600        | 17610       | 17620       | 17630       | 17640              | 17654                             |                         |                     |                   |
| Ad 12 X73487 (16537)           | T-CTCTA        | ACA--AGC    | TG-CGCT        | GCCGTT        | TTTTCAG      | GAT--GG     | CTCTTAC     | TTGCGG      | AA                 | TGCGCAT                           | ACC                     | CATTTCCAGGATACAGAGG | ACGAC--CCCGCC     |
| SARS-CoV-2 NC_045512.2 (13003) | AGCTGCC        | ACA         | GTACGT         | CTACAA        | GCTGT        | GAATG       | CAACAGAA    | GTGCTG      | CAATTC             | AA-CTG                            | TATATCTTTC              | TGTGCTTTT           | GCTGTAGATGCTGCTAA |

SARS-CoV-2 & Ad12.apr

|                                |       |       |        |              |              |           |                                        |             |          |               |                  |                    |                |            |              |          |             |       |         |           |        |      |      |      |
|--------------------------------|-------|-------|--------|--------------|--------------|-----------|----------------------------------------|-------------|----------|---------------|------------------|--------------------|----------------|------------|--------------|----------|-------------|-------|---------|-----------|--------|------|------|------|
|                                |       |       |        |              |              |           |                                        |             |          |               | Section 183      |                    |                |            |              |          |             |       |         |           |        |      |      |      |
| (17655)                        | 17655 | 17660 | 17670  | 17680        | 17690        | 17700     | 17710                                  | 17720       | 17730    | 17740         | 17751            |                    |                |            |              |          |             |       |         |           |        |      |      |      |
| Ad 12 X73487 (16626)           | G     | GAGG  | AAAGG  | GCTGACC      | -GG          | GAAACGGTC | -GATTT                                 | -----CG-G   | CGGCG    | TAGTATGCG     | CAGACGCATGAAGGGT |                    |                |            |              |          |             |       |         |           |        |      |      |      |
| SARS-CoV-2 NC_045512.2 (13099) | A     | GCTT  | ACAAG  | GATTATCTAG   | CTAGT        | GGGG      | GACAACCAATCACTAATTGTGTTAAGATGTTGTGTACA | CACAC       | TGGTACTG | GTCAGGCAAT-AA | CAGT             |                    |                |            |              |          |             |       |         |           |        |      |      |      |
|                                |       |       |        |              |              |           |                                        |             |          |               | Section 184      |                    |                |            |              |          |             |       |         |           |        |      |      |      |
| (17752)                        | 17752 | 17760 | 17770  | 17780        | 17790        | 17800     | 17810                                  | 17820       | 17830    | 17848         |                  |                    |                |            |              |          |             |       |         |           |        |      |      |      |
| Ad 12 X73487 (16691)           | G     | GGGT  | --GCT  | GCCCTTCCTAAT | -TCCACT      | --TATT    | GCTGCGGCCAT                            | TGGAGCCGTTC | CCGGAA   | TTGCC         | TAGCCTTG         | CAGGCCTTCTCGAAAAA- |                |            |              |          |             |       |         |           |        |      |      |      |
| SARS-CoV-2 NC_045512.2 (13195) | T     | A     | CACCG  | GAA          | GCCAA        | TATGGAT   | CAAGATCC                               | TTGGTGGTG   | CATCGT   | TTGTCTGTACT   | GCCGTTGCCA       | C-A                | TAGATCAT       | C          | AAAA         | TC       | CTAA        | AGG   | ATT     |           |        |      |      |      |
|                                |       |       |        |              |              |           |                                        |             |          |               | Section 185      |                    |                |            |              |          |             |       |         |           |        |      |      |      |
| (17849)                        | 17849 | 17860 | 17870  | 17880        | 17890        | 17900     | 17910                                  | 17920       | 17930    | 17945         |                  |                    |                |            |              |          |             |       |         |           |        |      |      |      |
| Ad 12 X73487 (16782)           | A     | TTAA  | ATAAAA | TAAAA        | -----AA      | ACTT      | CCAACTTA                               | TACTGGTACT  | ATGACTGT | ---TTAT       | GCAG             | --ACTA             | -----AAT       | TGGAAGACAT | CAATTTTTCGT  |          |             |       |         |           |        |      |      |      |
| SARS-CoV-2 NC_045512.2 (13291) | T     | TGTG  | ACT    | TTAAA        | AGGTAAGT     | ATGT      | TACAAA                                 | TACCTA      | -----CA  | ACTTGTGCTAA   | TGACC            | CTGTGGG            | TTTTAC         | ACTTAAAACA | -CAGTCTGTACC |          |             |       |         |           |        |      |      |      |
|                                |       |       |        |              |              |           |                                        |             |          |               | Section 186      |                    |                |            |              |          |             |       |         |           |        |      |      |      |
| (17946)                        | 17946 | 17960 | 17970  | 17980        | 17990        | 18000     | 18010                                  | 18020       | 18030    | 18042         |                  |                    |                |            |              |          |             |       |         |           |        |      |      |      |
| Ad 12 X73487 (16865)           | C     | G     | CTG    | GCCCCGCGAC   | ACG          | GCACGC    | GGCCGTA                                | CATGGGCAC   | CTGGAA   | CGAGAT        | CG---            | GCACG              | AGC            | CAGCTG     | AAC          | GGGGGCGC | ---CTT      | CAATT | GGAA    |           |        |      |      |      |
| SARS-CoV-2 NC_045512.2 (13379) | G     | T     | CTG    | CGGTATGTGG   | AAA          | GGTTAT    | GGCTGTA                                | AGTTGTG     | -ATCA    | AACTC         | CGCGAAC          | CCATGC             | TTC            | AGT        | CAGCTG       | -ATG     | CACAAT      | C     | TTTT    | TAA       | CG     | GGTT |      |      |
|                                |       |       |        |              |              |           |                                        |             |          |               | Section 187      |                    |                |            |              |          |             |       |         |           |        |      |      |      |
| (18043)                        | 18043 | 18050 | 18060  | 18070        | 18080        | 18090     | 18100                                  | 18110       | 18120    | 18139         |                  |                    |                |            |              |          |             |       |         |           |        |      |      |      |
| Ad 12 X73487 (16956)           | C     | AGTA  | TC     | TG-          | GAGCGGT      | CTT---    | AAAAATT                                | TG          | GTTCC    | CACG          | ATTAGA           | -CAT               | ATGG           | CA---      | C            | CAAG     | GCGT        | TGA   | CACGCCA | AA        | CCGGCC | AGAT | GCTA |      |
| SARS-CoV-2 NC_045512.2 (13474) | T     | G     | CGG    | TGTAA        | GTGCAGC      | CCGTCTT   | ACACCGT                                | GCGGCA      | CAGG     | CACTAG        | TACTG            | ATGT               | CGTATA         | CAGG       | GCTTT        | TGA      | CATCTAC     | AA    | TGATAA  | AGTA      | GCT-   |      |      |      |
|                                |       |       |        |              |              |           |                                        |             |          |               | Section 188      |                    |                |            |              |          |             |       |         |           |        |      |      |      |
| (18140)                        | 18140 | 18150 | 18160  | 18170        | 18180        | 18190     | 18200                                  | 18210       | 18220    | 18236         |                  |                    |                |            |              |          |             |       |         |           |        |      |      |      |
| Ad 12 X73487 (17044)           | A     | G     | GGACAA | GT           | TAAA         | AGAC      | CAAAA                                  | TTTT        | CAAC     | AGAAA         | GTTGTAG          | -AT                | GGTCTGGCTTCGG  | GAA        | TTAATG       | GAGT     | TGTAGACATAG | C     | AA      | TCAG      | GCT    | GT   | A    |      |
| SARS-CoV-2 NC_045512.2 (13570) | --    | GG    | TTTT   | GC           | TAAA         | TTCT      | AAAA                                   | AC-T        | ----     | A-ATT         | GTTGT            | CGCT               | TCCAAGAAAAGGAC | GAA        | G--          | ATG      | ACAA        | TTTA  | ATTGATT | CTT       | A      | CTTT | GTA  | GT   |
|                                |       |       |        |              |              |           |                                        |             |          |               | Section 189      |                    |                |            |              |          |             |       |         |           |        |      |      |      |
| (18237)                        | 18237 | 18250 | 18260  | 18270        | 18280        | 18290     | 18300                                  | 18310       | 18320    | 18333         |                  |                    |                |            |              |          |             |       |         |           |        |      |      |      |
| Ad 12 X73487 (17140)           | C     | AGA   | AAAA   | AAT          | -----GC      | CAAC      | CGTTT                                  | AGA         | GC       | GCGGCCCGA     | CGAGG            | TAA                | TGGT           | AGA        | G            | GAAA     | AG          | CTG   | CCA     | CCTCTAGAA | ACTG   | -TG  | CCCC | GGA  |
| SARS-CoV-2 NC_045512.2 (13657) | A     | AGA   | GACAC  | AC           | TTTCTCTAACTA | CAACA     | ATGA                                   | AGAA        | ACA      | ATTTTATA      | ATTTAC           | T                  | AAG            | -GATT      | G            | TCC      | AG-         | CTG   | TTG     | CTAAACATG | ACT    | TC   | TTTA | AGTT |

SARS-CoV-2 & Ad12.apr

|                                |           |       |         |          |        |       |         |        |          |         |       |       |        |        |             |           |       |       |          |        |         |         |          |          |      |        |          |          |       |       |        |       |   |
|--------------------------------|-----------|-------|---------|----------|--------|-------|---------|--------|----------|---------|-------|-------|--------|--------|-------------|-----------|-------|-------|----------|--------|---------|---------|----------|----------|------|--------|----------|----------|-------|-------|--------|-------|---|
|                                |           |       |         |          |        |       |         |        |          |         |       |       |        |        | Section 190 |           |       |       |          |        |         |         |          |          |      |        |          |          |       |       |        |       |   |
| (18334)                        | 18334     | 18340 | 18350   | 18360    | 18370  | 18380 | 18390   | 18400  | 18410    | 18420   | 18430 |       |        |        |             |           |       |       |          |        |         |         |          |          |      |        |          |          |       |       |        |       |   |
| Ad 12 X73487 (17227)           | TCCGT     | TCC   | AACCAAA | GGAGAAAG | CGGC   | CCAC  | GGCCGG  | ATGC   | AGGA     | AAAC    | CTTAG | TAA   | CGC    | ACACAA | CAG         | -AAC      | CGC   | CGTC  | CTATGAGG | AAG    | CA      | AT      | A        |          |      |        |          |          |       |       |        |       |   |
| SARS-CoV-2 NC_045512.2 (13752) | TAGAA     | TAG   | A       | C-----   | GGT    | GAC   | AT      | GGTA   | CCAC     | --      | ATAT  | AT    | CAC    | G      | TCA         | ACGT      | CTTA  | C     | TAA      | AT-    | ACACAA  | TG      | C        | AGA      | CCT  | CGTC   | TATGCTTT | AAG      | GC    | AT    | T      |       |   |
|                                |           |       |         |          |        |       |         |        |          |         |       |       |        |        | Section 191 |           |       |       |          |        |         |         |          |          |      |        |          |          |       |       |        |       |   |
| (18431)                        | 18431     | 18440 | 18450   | 18460    | 18470  | 18480 | 18490   | 18500  | 18510    | 18527   |       |       |        |        |             |           |       |       |          |        |         |         |          |          |      |        |          |          |       |       |        |       |   |
| Ad 12 X73487 (17323)           | AAACAAGGA | GCCGC | TCTGT   | CACCT    | ACC    | ACCT  | ATCC    | CAT    | TGAC     | CAA     | GC    | CTATT | T      | TACCC  | ATG         | GCT       | AC    | TAGAG | TGT      | ATGG   | AAAA    | AC      | GAAAAT   | GTGCC    | TA   |        |          |          |       |       |        |       |   |
| SARS-CoV-2 NC_045512.2 (13841) | TTGATGAAG | GTAAT | TGTGA   | CACAT    | TAA    | AAGA  | AATA    | CT     | TGTC     | ACATA   | CA    | ATTG  | T      | TGTG   | ATG         | ATG       | ATT   | TATT  | -TCA     | AT     | AAAA    | GG      | AC       | TGG----- | TA   |        |          |          |       |       |        |       |   |
|                                |           |       |         |          |        |       |         |        |          |         |       |       |        |        | Section 192 |           |       |       |          |        |         |         |          |          |      |        |          |          |       |       |        |       |   |
| (18528)                        | 18528     | 18540 | 18550   | 18560    | 18570  | 18580 | 18590   | 18600  | 18610    | 18624   |       |       |        |        |             |           |       |       |          |        |         |         |          |          |      |        |          |          |       |       |        |       |   |
| Ad 12 X73487 (17420)           | TGA       | CCC   | TTG     | AG       | CTGCCT | CC    | TTTGCC  | AGA    | ACCACTAT | CGCG    | GAT   | CC    | CGT    | AGG    | TT          | CC        | GT    | TCCT  | GT       | TG---- | CA      | TCTG    | TT       | CCA      | GTT  | GC     | ATCG     | ACAGTGA  |       |       |        |       |   |
| SARS-CoV-2 NC_045512.2 (13929) | TGA       | TTT   | TGT     | AG       | AAAA-C | CC    | AGATAT  | ATT    | A-----   | CGCG    | TAT   | AG    | GCC    | AAC    | TT          | AG        | GT    | GAAC  | GT       | GTACGC | CA      | AGCT    | TT---    | GTT      | AAA  | AAAC   | AGTACAA  |          |       |       |        |       |   |
|                                |           |       |         |          |        |       |         |        |          |         |       |       |        |        | Section 193 |           |       |       |          |        |         |         |          |          |      |        |          |          |       |       |        |       |   |
| (18625)                        | 18625     | 18630 | 18640   | 18650    | 18660  | 18670 | 18680   | 18690  | 18700    | 18710   | 18721 |       |        |        |             |           |       |       |          |        |         |         |          |          |      |        |          |          |       |       |        |       |   |
| Ad 12 X73487 (17513)           | G-        | CGT   | CCA     | GC       | AG     | TGCG  | GCC     | TG     | T-----   | TGCC-   | GTG   | GCTAG | -      | CTT    | TGC         | GAA       | CC    | CA    | CATC     | -      | CAG     | T---    | AA       | TGG      | CA   | A----- | AGT      | AC       | ---   |       |        |       |   |
| SARS-CoV-2 NC_045512.2 (14014) | TT        | CT    | GT      | GAT      | GC     | CA    | TGCG    | AAA    | TG       | CTGGTAT | TG    | TTG   | GTG    | TACT   | GAC         | AT        | TAGAT | AAT   | CA       | AGATC  | T       | CA      | TGGT     | AA       | TGG  | T      | ATGATTT  | CGGTG    | ATT   | C     | CATAC  |       |   |
|                                |           |       |         |          |        |       |         |        |          |         |       |       |        |        | Section 194 |           |       |       |          |        |         |         |          |          |      |        |          |          |       |       |        |       |   |
| (18722)                        | 18722     | 18730 | 18740   | 18750    | 18760  | 18770 | 18780   | 18790  | 18800    | 18818   |       |       |        |        |             |           |       |       |          |        |         |         |          |          |      |        |          |          |       |       |        |       |   |
| Ad 12 X73487 (17584)           | ---       | CT    | AAA     | CAGTA    | TT     | GTGG  | GACT    | TGGGAG | TAA      | AGTC    | TCT   | CA    | AACGC  | CG     | AG          | CT        | GCT   | TACT  | AA       | CATT   | TAAA    | AA      | GACGAGT  | GT       | T    | AATT   | CCCAT    | CT       | TGTGT | TATAC |        |       |   |
| SARS-CoV-2 NC_045512.2 (14111) | AAA       | CC    | ACG     | CAGG     | T      | AGTGG | AGT     | TCTGT  | TGT      | AGAT    | TCT   | T     | ATTATT | CATT   | GT          | T         | AATG  | CTA-- | TATT     | AA     | CCT---- | TG      | ACCAGGGC | T        | T    | TAAC   | T        | GCA-     |       |       |        |       |   |
|                                |           |       |         |          |        |       |         |        |          |         |       |       |        |        | Section 195 |           |       |       |          |        |         |         |          |          |      |        |          |          |       |       |        |       |   |
| (18819)                        | 18819     | 18830 | 18840   | 18850    | 18860  | 18870 | 18880   | 18890  | 18900    | 18915   |       |       |        |        |             |           |       |       |          |        |         |         |          |          |      |        |          |          |       |       |        |       |   |
| Ad 12 X73487 (17678)           | GCC       | TC    | CT      | ATGTT    | AG     | CG    | CAGAGG  | AC     | CAA      | CG      | GT    | GA    | ATCGC  | AGT    | CA-CC       | ACCAGCGCT | TT    | C-    | A        | AG--   | AT      | GG      | CCAC--   | TCCCT    | CG   | ATGA   | TGCCG    | C        | AGT   | G     |        |       |   |
| SARS-CoV-2 NC_045512.2 (14200) | GAG       | TC    | AC      | ATGTT    | GA     | CA    | CTGACTT | AA     | CAA      | AGC     | CT    | TA    | CATTA  | AGT    | GGG         | ATTGTT    | TAAAA | TATG  | ACTTC    | AC     | GG      | AAGAGAG | GTT      | AAAA     | ACTC | TTTGA  | C        | CGT      | T     |       |        |       |   |
|                                |           |       |         |          |        |       |         |        |          |         |       |       |        |        | Section 196 |           |       |       |          |        |         |         |          |          |      |        |          |          |       |       |        |       |   |
| (18916)                        | 18916     | 18930 | 18940   | 18950    | 18960  | 18970 | 18980   | 18990  | 19000    | 19012   |       |       |        |        |             |           |       |       |          |        |         |         |          |          |      |        |          |          |       |       |        |       |   |
| Ad 12 X73487 (17769)           | G         | T     | CTT     | ACATGC   | AC     | AT    | CGCC    | GG     | TCAG     | GA      | TGCCT | CG    | GAGT   | AC     | TGAG        | -TCC      | CGGT  | C     | TGG      | TGC    | A       | ATT-C   | GC       | CCG      | CGC  | CA     | CGG      | ACACCTAC | TT    | C     | ACCC-- | T     |   |
| SARS-CoV-2 NC_045512.2 (14297) | A         | TT    | TT      | -----    | AA     | AT    | TATTG   | GG     | ATCA     | GA      | CATAC | C     | ACCCAA | AT     | TG          | TGT       | TAA   | CT    | GTT      | TGG    | ATG     | ACAGAT  | GC       | ATT      | CTG  | CA     | TTG      | TGCA     | AACT  | TTA   | A      | TGTTT | T |

SARS-CoV-2 & Ad12.apr

|                                |         |             |        |         |        |       |        |       |        |          |         |        |       |         |          |          |           |         |        |          |       |       |         |       |        |          |      |
|--------------------------------|---------|-------------|--------|---------|--------|-------|--------|-------|--------|----------|---------|--------|-------|---------|----------|----------|-----------|---------|--------|----------|-------|-------|---------|-------|--------|----------|------|
|                                |         | Section 197 |        |         |        |       |        |       |        |          |         |        |       |         |          |          |           |         |        |          |       |       |         |       |        |          |      |
|                                | (19013) | 19013       | 19020  | 19030   | 19040  | 19050 | 19060  | 19070 | 19080  | 19090    | 19109   |        |       |         |          |          |           |         |        |          |       |       |         |       |        |          |      |
| Ad 12 X73487 (17862)           | GGGAAAC | AAGTT       | TAGAAA | CCCC    | ---    | ACCGT | TGGCTC | CCAC  | CCA    | TGA      | TGTT    | ACC    | ACCGA | TGGCT   | TCGCA    | GCGT     | CTGA      | ACGC    | TGC    | GT       | --    | TTT   | GTG     | CCC   | GTGG   |          |      |
| SARS-CoV-2 NC_045512.2 (14388) | ATTCTCT | ACA-G       | TGTTCC | CACC    | TAC    | AAGT  | TTTGG  | CCAC  | TAG    | TGA      | GAAA    | AAT    | AT--- | TTGT    | TGATG    | GT       | GT        | TCC     | A---   | TTT      | GT    | AG    | TTT     | CAA   | CTG    | GATA     |      |
|                                |         | Section 198 |        |         |        |       |        |       |        |          |         |        |       |         |          |          |           |         |        |          |       |       |         |       |        |          |      |
|                                | (19110) | 19110       | 19120  | 19130   | 19140  | 19150 | 19160  | 19170 | 19180  | 19190    | 19206   |        |       |         |          |          |           |         |        |          |       |       |         |       |        |          |      |
| Ad 12 X73487 (17954)           | ATCGGGA | AGA         | ---    | TACTACC | TACT   | CCTAC | -A     | AGGCT | CGCTTT | ACG      | CTGGCT  | GTGGGT | GAC   | AACC    | GCG      | TGTT     | AGAC      | ATGG    | CTAGT  | TCT      | TACT  | TTGAC |         |       |        |          |      |
| SARS-CoV-2 NC_045512.2 (14478) | CCACTTC | AGA         | GAGC   | TAGGTGT | TGTA   | CATA  | ATC    | AGGA  | TG     | TAACTTAC | ---     | ATAG   | CTCTA | GAC     | T-TAGT   | -TT      | AAG       | AATTA   | CTT    | GT       | GTA   | TGCT  | GCT     | -G    |        |          |      |
|                                |         | Section 199 |        |         |        |       |        |       |        |          |         |        |       |         |          |          |           |         |        |          |       |       |         |       |        |          |      |
|                                | (19207) | 19207       | 19220  | 19230   | 19240  | 19250 | 19260  | 19270 | 19280  | 19290    | 19303   |        |       |         |          |          |           |         |        |          |       |       |         |       |        |          |      |
| Ad 12 X73487 (18046)           | ATT     | CGA         | GGGG   | TACT    | GGAT   | CGT   | ---    | GTCC  | CAG    | TTT      | TAA     | AGCCC  | TA    | ---     | TT       | CGGAAC   | CGCC      | TACAATT | CTTT   | GGCAC    | CAA   | AGGC  | GCT     | CT    | ---    | A        |      |
| SARS-CoV-2 NC_045512.2 (14570) | ACC     | CT          | -GCTA  | TG      | CAC    | GC    | TGC    | TCTG  | TAAT   | CTA      | TT--    | ACTAGA | TA    | AACGCAC | TACGTG   | CTTT     | TCAGTAG   | CTG     | CACTTA | CT       | AA    | CAAT  | GT      | TGCT  | TTTTCA |          |      |
|                                |         | Section 200 |        |         |        |       |        |       |        |          |         |        |       |         |          |          |           |         |        |          |       |       |         |       |        |          |      |
|                                | (19304) | 19304       | 19310  | 19320   | 19330  | 19340 | 19350  | 19360 | 19370  | 19380    | 19390   | 19400  |       |         |          |          |           |         |        |          |       |       |         |       |        |          |      |
| Ad 12 X73487 (18131)           | ATGCT   | TCA         | CAATG  | G       | ---    | TCAG  | AT--   | AACGC | TA--   | AGCT     | TAAT    | TAC    | CTTT  | GTCTC   | -AGG     | CGCCG    | TAT       | --      | CTTAGC | GACACT   | TA--  | TC    | ACCGCCG | CCGA  |        |          |      |
| SARS-CoV-2 NC_045512.2 (14664) | A       | ACTG        | TC     | AA      | ACCC   | G     | GTAAT  | TTTA  | ACAA   | AGACT    | TCTAT   | GACT   | --    | TGCTGTG | TCTA     | AGG      | GTTTC     | TTTAA   | -GGAAG | GAAGT    | TCTGT | TGA   | AT-TAA  | AACA  |        |          |      |
|                                |         | Section 201 |        |         |        |       |        |       |        |          |         |        |       |         |          |          |           |         |        |          |       |       |         |       |        |          |      |
|                                | (19401) | 19401       | 19410  | 19420   | 19430  | 19440 | 19450  | 19460 | 19470  | 19480    | 19497   |        |       |         |          |          |           |         |        |          |       |       |         |       |        |          |      |
| Ad 12 X73487 (18213)           | -----   | TGG         | TAT    | TAA     | AGT    | TGG   | AACA   | GACA  | CGC    | CAG      | G       | CAGGCG | -     | CGG     | CGGTG    | -----    | -----     | TATG    | CC     | AA       | CAAA  | AA    | -----   | CTTAT |        |          |      |
| SARS-CoV-2 NC_045512.2 (14757) | CTTCTTC | -TT         | TGC    | TC      | AG     | GA    | TGG    | TAA   | TGCTG  | TAT      | CAGC    | GATTAT | GACTA | CTAT    | TCGTTATA | ATCTACCA | ACAATG    | TGTG    | AT     | CAG      | ACA   | ACTA  | CTAT    | T     |        |          |      |
|                                |         | Section 202 |        |         |        |       |        |       |        |          |         |        |       |         |          |          |           |         |        |          |       |       |         |       |        |          |      |
|                                | (19498) | 19498       | 19510  | 19520   | 19530  | 19540 | 19550  | 19560 | 19570  | 19580    | 19594   |        |       |         |          |          |           |         |        |          |       |       |         |       |        |          |      |
| Ad 12 X73487 (18277)           | CAGCC   | CAGAG       | CCGCA  | AGT     | AGG    | ACCA  | AGT    | GA    | ATG    | CAACACCA | G       | CAT    | TG    | AAAACG  | TTAA     | GCT      | GGCGGG    | AGG     | G      | CA       | T     | TAAAG | CA      | AAC   | AC     | TGCAATGC | AGC  |
| SARS-CoV-2 NC_045512.2 (14853) | TGTAG   | TTGA        | AGTTG  | TTG     | ATA    | AGT   | ACT    | TTG   | ATT    | G        | TTACGAT | G--    | GTG   | GCTGTA  | TTAA     | TGCT     | AA--      | CC      | AGT    | CA-T     | --    | CGTC  | AAC     | ACCT  | -----  | AGA      |      |
|                                |         | Section 203 |        |         |        |       |        |       |        |          |         |        |       |         |          |          |           |         |        |          |       |       |         |       |        |          |      |
|                                | (19595) | 19595       | 19600  | 19610   | 19620  | 19630 | 19640  | 19650 | 19660  | 19670    | 19680   | 19691  |       |         |          |          |           |         |        |          |       |       |         |       |        |          |      |
| Ad 12 X73487 (18374)           | CGT     | GCT         | ATGG   | CTCC    | TACGCT | GT    | TCC    | AA    | CCAA   | C        | GAACACG | GAG    | GACA  | ATCCA   | AGG      | ATG      | -----     | ACA     | ACA    | TT       | GAAC  | ---   | TTAAG   | TT    | CT--   | TT       | GATT |
| SARS-CoV-2 NC_045512.2 (14937) | C       | AAATC       | AG--   | CTGGT   | -TTTC  | CAT   | TTT    | AA    | TAA    | AAT      | TGGGTA  | AG--   | GCTA  | --      | GACTTT   | AT       | TATGATTCA | ATGAG   | -TT    | ATGAGGAT | CAAG  | AT    | TGCAC   | TT    | TTTCG  |          |      |

SARS-CoV-2 & Ad12.apr

|                                |                                                                                                      |       |       |       |       |       |       |       |       |       |             |
|--------------------------------|------------------------------------------------------------------------------------------------------|-------|-------|-------|-------|-------|-------|-------|-------|-------|-------------|
|                                |                                                                                                      |       |       |       |       |       |       |       |       |       | Section 204 |
|                                | (19692)                                                                                              | 19692 | 19700 | 19710 | 19720 | 19730 | 19740 | 19750 | 19760 | 19770 | 19788       |
| Ad 12 X73487 (18458)           | CAGCTAA-----CAATGCAGCAAAACACTGCTCAAGTT----GTGTTCTATACCGAAGACGTAAACCTTGAAATGCCAGACACGCACTCTTG         |       |       |       |       |       |       |       |       |       |             |
| SARS-CoV-2 NC_045512.2 (15026) | CATATACAAAACGTAATGTCAATCCCTAGCTATA---ACTCAAAATGAATC-TTAAGTATGCCATTAGTGCAAAGAATAGAGCTCGCACCGTAGCTGGTG |       |       |       |       |       |       |       |       |       |             |
|                                |                                                                                                      |       |       |       |       |       |       |       |       |       | Section 205 |
|                                | (19789)                                                                                              | 19789 | 19800 | 19810 | 19820 | 19830 | 19840 | 19850 | 19860 | 19870 | 19885       |
| Ad 12 X73487 (18539)           | TGTTTAAGCC--TACTGTTACCAATGGAACAAATTGCTTCTGAGTTCGCTGTTGGGACAGCAAGCAGCGCCAAATAGAGCAAACTACATTGCATTTCAG  |       |       |       |       |       |       |       |       |       |             |
| SARS-CoV-2 NC_045512.2 (15119) | TCTCTATCTGTAGTACTATGACCAATAGACAGTTTCATCAAAAATATATT-----GAATCAATAGCAGCGCC-AC TAGAG-GAGCTAC--TGTA----- |       |       |       |       |       |       |       |       |       |             |
|                                |                                                                                                      |       |       |       |       |       |       |       |       |       | Section 206 |
|                                | (19886)                                                                                              | 19886 | 19900 | 19910 | 19920 | 19930 | 19940 | 19950 | 19960 | 19970 | 19982       |
| Ad 12 X73487 (18633)           | AGATAAATTTT---ATTGGCCTGATGTTA----TTACAACAGTACAG-GCAACA TGGGTGATTGCGCCGGCAAGCTTCCAACTTAACGCAGTAGTAG   |       |       |       |       |       |       |       |       |       |             |
| SARS-CoV-2 NC_045512.2 (15202) | --GTAATTTGGAACAAGCAAAATCTATGGTGGTTGGCAACAATGTTAAACAC TGTATTATAGTGATGTAGAAACCTC-ACCTTAGTGGT----TGG    |       |       |       |       |       |       |       |       |       |             |
|                                |                                                                                                      |       |       |       |       |       |       |       |       |       | Section 207 |
|                                | (19983)                                                                                              | 19983 | 19990 | 20000 | 20010 | 20020 | 20030 | 20040 | 20050 | 20060 | 20079       |
| Ad 12 X73487 (18722)           | -ACCTGCAAGACAGAAATACAGAGCTGTCATAC-CAGTTAATGCTGGATGCTTTGGGAGAC-----AG--AACACGGTACTTTTCCCT----TGTGG    |       |       |       |       |       |       |       |       |       |             |
| SARS-CoV-2 NC_045512.2 (15292) | GATTATCCTAAATGTGATAGAGCCATGCTTAACAT-GCTTAGAATTATGCGCTCACTTGTTCTTGCTCGCAACAATACACGTGTTGTAGCTTGTCTC-   |       |       |       |       |       |       |       |       |       |             |
|                                |                                                                                                      |       |       |       |       |       |       |       |       |       | Section 208 |
|                                | (20080)                                                                                              | 20080 | 20090 | 20100 | 20110 | 20120 | 20130 | 20140 | 20150 | 20160 | 20176       |
| Ad 12 X73487 (18805)           | AATTCCGCAGTGGACAGTTACGACCCTGACGT-----TCGCGTTATTGAGAAATCACGGGGTAGAGGATGAACCTACCAAAATTATTGCTT-TCCTCTTA |       |       |       |       |       |       |       |       |       |             |
| SARS-CoV-2 NC_045512.2 (15387) | -ACA CCGTTTCTATAGATTAGCTAATGAGTGTGCTCAAGTATTGAGTGAAATGGTCATGTGTGGCGGTTCACTATATGTTAAACCAGGTGGAACCTC   |       |       |       |       |       |       |       |       |       |             |
|                                |                                                                                                      |       |       |       |       |       |       |       |       |       | Section 209 |
|                                | (20177)                                                                                              | 20177 | 20190 | 20200 | 20210 | 20220 | 20230 | 20240 | 20250 | 20260 | 20273       |
| Ad 12 X73487 (18896)           | GCGCAGTAGGTGAATAAAAAAT--TACAAAGGCAT---TAA GCCAGATACCGAGGAGGAGGTGCTGGAC TGCCGACAACACTGTCAGTGAAGC-     |       |       |       |       |       |       |       |       |       |             |
| SARS-CoV-2 NC_045512.2 (15483) | ATCAGGAGATGCCACAAGTGCTTATGCTAAATAGTGTTTTTAAACATTTGTCAAGCTG--TCACG--GC CAATGTTAATGCACTTTTATCTACTGATGG |       |       |       |       |       |       |       |       |       |             |
|                                |                                                                                                      |       |       |       |       |       |       |       |       |       | Section 210 |
|                                | (20274)                                                                                              | 20274 | 20280 | 20290 | 20300 | 20310 | 20320 | 20330 | 20340 | 20350 | 20360 20370 |
| Ad 12 X73487 (18987)           | AAACCAATAGGCATTGGGAATATAG-CCGCC---ATGGAAATTAATTG CAGGCTA-ATTTGTGGAGAAGCTTCTTGTAC-----TCAAATGTGGG     |       |       |       |       |       |       |       |       |       |             |
| SARS-CoV-2 NC_045512.2 (15576) | TAACAAATTCGCGATAAGTATGTCCGCAATTTACAACACAGACTTTATGAGTGTCTCTATAGAAATAGAGATGTTGACACAGACTTTGTGAATGAG     |       |       |       |       |       |       |       |       |       |             |

SARS-CoV-2 & Ad12.apr

|                                |         |              |           |          |          |         |         |             |              |         |         |         |         |        |             |        |         |        |        |       |       |      |       |      |      |      |       |    |     |     |      |     |     |    |    |     |    |    |     |     |     |     |     |     |    |     |
|--------------------------------|---------|--------------|-----------|----------|----------|---------|---------|-------------|--------------|---------|---------|---------|---------|--------|-------------|--------|---------|--------|--------|-------|-------|------|-------|------|------|------|-------|----|-----|-----|------|-----|-----|----|----|-----|----|----|-----|-----|-----|-----|-----|-----|----|-----|
|                                |         |              |           |          |          |         |         |             |              |         |         |         |         |        | Section 211 |        |         |        |        |       |       |      |       |      |      |      |       |    |     |     |      |     |     |    |    |     |    |    |     |     |     |     |     |     |    |     |
|                                | (20371) | 20371        | 20380     | 20390    | 20400    | 20410   | 20420   | 20430       | 20440        | 20450   | 20467   |         |         |        |             |        |         |        |        |       |       |      |       |      |      |      |       |    |     |     |      |     |     |    |    |     |    |    |     |     |     |     |     |     |    |     |
| Ad 12 X73487 (19074)           |         | CTTAT----    | ACCTAC    | CAGAC--- | GACTTAA  | AAATAC  | CACCTC  | CAGGAACAT   | AAAA-----    | CTACCTT | -GATA-- | ACAAGAA | CACCT   | ACGAGT | ACATGAA     |        |         |        |        |       |       |      |       |      |      |      |       |    |     |     |      |     |     |    |    |     |    |    |     |     |     |     |     |     |    |     |
| SARS-CoV-2 NC_045512.2 (15673) |         | TTT          | TACGCATAT | TTGCGT   | AAACATTT | CTCAA   | TGATGAT | TACTCTCTGAC | GATGCTGTTGTG | TGTTT   | CAATA   | GCAC    | TTATG   | CATCT  | CAAGGTCT    | AGTGG  |         |        |        |       |       |      |       |      |      |      |       |    |     |     |      |     |     |    |    |     |    |    |     |     |     |     |     |     |    |     |
|                                |         |              |           |          |          |         |         |             |              |         |         |         |         |        |             |        |         |        |        |       |       |      |       |      |      |      |       |    |     |     |      |     |     |    |    |     |    |    |     |     |     |     |     |     |    |     |
|                                |         |              |           |          |          |         |         |             |              |         |         |         |         |        | Section 212 |        |         |        |        |       |       |      |       |      |      |      |       |    |     |     |      |     |     |    |    |     |    |    |     |     |     |     |     |     |    |     |
|                                | (20468) | 20468        | 20480     | 20490    | 20500    | 20510   | 20520   | 20530       | 20540        | 20550   | 20564   |         |         |        |             |        |         |        |        |       |       |      |       |      |      |      |       |    |     |     |      |     |     |    |    |     |    |    |     |     |     |     |     |     |    |     |
| Ad 12 X73487 (19155)           |         | CG--GGCGTGTG | ACTGCC    | CCCGGG   | GTTGGT   | TGGATAC | CTATGTC | AATAT       | CGGCGC       | TCGCTG  | GTCC    | CAGATGT | GATGGAT | AATGT  | TAAAC       | CCCTTT | TAA     | CC     |        |       |       |      |       |      |      |      |       |    |     |     |      |     |     |    |    |     |    |    |     |     |     |     |     |     |    |     |
| SARS-CoV-2 NC_045512.2 (15770) |         | C            | TAGCATAA  | AGA      | ACTTTA   | AGTCA   | GTTCT   | TATTA       | CAAA         | CAAA    | ATGT    | TTTTATG | TC      | TGAAG  | CA-AA--     | ATGT   | TGGACTG | AGAC   | T      | AC    | CTTAC | TAA  | GG    |      |      |      |       |    |     |     |      |     |     |    |    |     |    |    |     |     |     |     |     |     |    |     |
|                                |         |              |           |          |          |         |         |             |              |         |         |         |         |        |             |        |         |        |        |       |       |      |       |      |      |      |       |    |     |     |      |     |     |    |    |     |    |    |     |     |     |     |     |     |    |     |
|                                |         |              |           |          |          |         |         |             |              |         |         |         |         |        | Section 213 |        |         |        |        |       |       |      |       |      |      |      |       |    |     |     |      |     |     |    |    |     |    |    |     |     |     |     |     |     |    |     |
|                                | (20565) | 20565        | 20570     | 20580    | 20590    | 20600   | 20610   | 20620       | 20630        | 20640   | 20650   | 20661   |         |        |             |        |         |        |        |       |       |      |       |      |      |      |       |    |     |     |      |     |     |    |    |     |    |    |     |     |     |     |     |     |    |     |
| Ad 12 X73487 (19250)           |         | ACCA         | C         | CGAA     | AA       | CGCAG   | GGGT    | TGCG-C      | TACAGAT      | CCA-T   | GTTG    | CTAGG   | CAATG   | GG-AG  | ATT         | TGTT   | CCTTT   | TT     | CACATT | CAGGT | GC    | CGC  | -AAAA | AT-T | TTTT |      |       |    |     |     |      |     |     |    |    |     |    |    |     |     |     |     |     |     |    |     |
| SARS-CoV-2 NC_045512.2 (15864) |         | ACC          | T         | CATG     | AA       | TTTT    | GCTC    | TCAACA      | TACA         | ATGCT   | AGT     | TAAA    | CAG     | GGTG   | ATG         | ATT    | TGT     | ACCTT  | -C     | TTACC | CAGAT | TC   | CAT   | CAAG | AA   | TCC  | TAGGG |    |     |     |      |     |     |    |    |     |    |    |     |     |     |     |     |     |    |     |
|                                |         |              |           |          |          |         |         |             |              |         |         |         |         |        |             |        |         |        |        |       |       |      |       |      |      |      |       |    |     |     |      |     |     |    |    |     |    |    |     |     |     |     |     |     |    |     |
|                                |         |              |           |          |          |         |         |             |              |         |         |         |         |        | Section 214 |        |         |        |        |       |       |      |       |      |      |      |       |    |     |     |      |     |     |    |    |     |    |    |     |     |     |     |     |     |    |     |
|                                | (20662) | 20662        | 20670     | 20680    | 20690    | 20700   | 20710   | 20720       | 20730        | 20740   | 20758   |         |         |        |             |        |         |        |        |       |       |      |       |      |      |      |       |    |     |     |      |     |     |    |    |     |    |    |     |     |     |     |     |     |    |     |
| Ad 12 X73487 (19342)           |         | GCC          | AT        | CAG      | -----    | AAAT    | TTGT    | TTGCT       | GTTGCC       | CGGTT   | CC      | TACACT  | TTA     | CGA    | AT          | GA     | --AC    | TTTA   | GAAAGG | ATG   | TAAAC | ATG  | ATT   | CTT  | CA   | GAGC | ACA   | CT |     |     |      |     |     |    |    |     |    |    |     |     |     |     |     |     |    |     |
| SARS-CoV-2 NC_045512.2 (15958) |         | GCC          | GG        | CTG      | TTTT     | TGT     | AGAT    | -GAT        | TAT          | CGTAA   | AAAA    | CAG     | AT      | GG     | TACACT      | TTA    | TG      | AA     | CCGT   | TCGT  | G     | CTTT | AGC   | TAT  | AT   | AG   | ATG   | TT | ACC | CA  | CTTA | --- | CT  |    |    |     |    |    |     |     |     |     |     |     |    |     |
|                                |         |              |           |          |          |         |         |             |              |         |         |         |         |        |             |        |         |        |        |       |       |      |       |      |      |      |       |    |     |     |      |     |     |    |    |     |    |    |     |     |     |     |     |     |    |     |
|                                |         |              |           |          |          |         |         |             |              |         |         |         |         |        | Section 215 |        |         |        |        |       |       |      |       |      |      |      |       |    |     |     |      |     |     |    |    |     |    |    |     |     |     |     |     |     |    |     |
|                                | (20759) | 20759        | 20770     | 20780    | 20790    | 20800   | 20810   | 20820       | 20830        | 20840   | 20855   |         |         |        |             |        |         |        |        |       |       |      |       |      |      |      |       |    |     |     |      |     |     |    |    |     |    |    |     |     |     |     |     |     |    |     |
| Ad 12 X73487 (19431)           |         | G--GGA       | AT        | TGA      | TCT      | TCGGG   | TG      | ACGGA       | GCCAG        | CGTTC   | GC      | TT      | TGAC    | AAC--  | AT          | TGCCCT | G       | AT     | GCTA   | ACTT  | -TTTT | CCC  | AT    | GC   | ACAT | A    | ACAC  | AG | --- |     |      |     |     |    |    |     |    |    |     |     |     |     |     |     |    |     |
| SARS-CoV-2 NC_045512.2 (16051) |         | AAAC--       | A         | TCC      | TAA      | TCAGG   | AGT     | AT          | GCT          | GATGT   | CT      | TTC     | AT      | TT     | GT          | AG     | TT      | ACA    | AT     | ACATA | AGAA  | GCTA | CAT   | TGAT | TAG  | TTA  | AC    | AG | ACA | AT  | GTT  | AG  | ACA |    |    |     |    |    |     |     |     |     |     |     |    |     |
|                                |         |              |           |          |          |         |         |             |              |         |         |         |         |        |             |        |         |        |        |       |       |      |       |      |      |      |       |    |     |     |      |     |     |    |    |     |    |    |     |     |     |     |     |     |    |     |
|                                |         |              |           |          |          |         |         |             |              |         |         |         |         |        | Section 216 |        |         |        |        |       |       |      |       |      |      |      |       |    |     |     |      |     |     |    |    |     |    |    |     |     |     |     |     |     |    |     |
|                                | (20856) | 20856        | 20870     | 20880    | 20890    | 20900   | 20910   | 20920       | 20930        | 20940   | 20952   |         |         |        |             |        |         |        |        |       |       |      |       |      |      |      |       |    |     |     |      |     |     |    |    |     |    |    |     |     |     |     |     |     |    |     |
| Ad 12 X73487 (19521)           |         | T            | T         | CTACT    | T        | TAG     | AA      | GC          | CATGT        | T       | T       | AGAA    | ATG     | AC     | AC          | CAA    | C       | GACCAG | T      | CTT   | T     | TAA  | CGAT  | T    | TA-- | TTT  | G     | TG | -T  | GCT | G    | CAA | ACA | T  | G  | T   | AT | C  | CA  | TC  | CC  | A   | --- |     |    |     |
| SARS-CoV-2 NC_045512.2 (16145) |         | T            | G         | TATTC    | T        | GTT     | AT      | GC          | TTAC         | T       | AT      | GAT     | AC      | ACTT   | CAA         | GG     | ----    | T      | ATT    | GGG   | A     | CC   | TG    | AGT  | TTT  | AT   | G     | AG | GCT | AT  | G    | T   | ACA | C  | AC | CG  | AT | A  | CAG | TC  | TT  | A   | CAG |     |    |     |
|                                |         |              |           |          |          |         |         |             |              |         |         |         |         |        |             |        |         |        |        |       |       |      |       |      |      |      |       |    |     |     |      |     |     |    |    |     |    |    |     |     |     |     |     |     |    |     |
|                                |         |              |           |          |          |         |         |             |              |         |         |         |         |        | Section 217 |        |         |        |        |       |       |      |       |      |      |      |       |    |     |     |      |     |     |    |    |     |    |    |     |     |     |     |     |     |    |     |
|                                | (20953) | 20953        | 20960     | 20970    | 20980    | 20990   | 21000   | 21010       | 21020        | 21030   | 21049   |         |         |        |             |        |         |        |        |       |       |      |       |      |      |      |       |    |     |     |      |     |     |    |    |     |    |    |     |     |     |     |     |     |    |     |
| Ad 12 X73487 (19612)           |         | GCT          | AAC       | G        | CCA      | C       | ---     | CAGCG       | T            | GCC     | CAT     | TT      | CA      | ATAC   | CTTC        | G      | CG      | AA     | AT     | TG    | GG    | CG   | GC    | AT   | T    | T    | AG    | AG | CT  | G   | G    | AG  | CT  | TT | AC | T   | C  | -G | CC  | T   | AAA | ACT | AA  | AG  | AA | ACT |
| SARS-CoV-2 NC_045512.2 (16237) |         | GCT          | GTT       | G        | GGG      | C       | TTG     | TGTT        | C            | TTT     | G       | CA      | TT      | CA     | CAGA        | CTTC   | A       | TT     | AA     | GAT   | TG    | T    | GT    | GCT  | T    | G    | CAT   | AC | G   | TAG | -ACC | AT  | T   | C  | T  | TAT | G  | TT | GT  | AAA | TG  | CT  | G   | TTA | CG | AC  |

SARS-CoV-2 & Ad12.apr

|                                |               |          |              |            |           |             |           |             |            |           |                    |                   |
|--------------------------------|---------------|----------|--------------|------------|-----------|-------------|-----------|-------------|------------|-----------|--------------------|-------------------|
|                                |               |          |              |            |           |             |           |             |            |           | Section 218        |                   |
|                                | (21050)       | 21050    | 21060        | 21070      | 21080     | 21090       | 21100     | 21110       | 21120      | 21130     | 21146              |                   |
| Ad 12 X73487 (19705)           | CCTTCCCTGGGT  | TCAGGGTT | TGACCCCT     | ACTTTGTA   | TA-----   | CTCTGGAACCA | ATCCCTAT  | TTA-GACG    | GCACTTTT   | TAC--     | CTAAACCACACTTT     |                   |
| SARS-CoV-2 NC_045512.2 (16333) | CATG-----     | TC---A   | TATCAACATC   | AC---A     | TAAATTAGT | CTTGCTGTGTT | AATCCGTAT | GTTT---     | GCAA---    | TGCTC     | CAGGTTGTGATGTC     |                   |
|                                |               |          |              |            |           |             |           |             |            |           | Section 219        |                   |
|                                | (21147)       | 21147    | 21160        | 21170      | 21180     | 21190       | 21200     | 21210       | 21220      | 21230     | 21243              |                   |
| Ad 12 X73487 (19794)           | TAGAAAGGTGTCA | ATCATGTT | TGACTCCTCCG  | TGAGTT     | TGGCCT    | TGAAATGA    | ACGTTTGCT | AACCCCAA    | ATGAATTT   | GAAATAAAG | CGTCTGTG---        |                   |
| SARS-CoV-2 NC_045512.2 (16408) | ACAGATGTGACTC | AAC TTAC | TTAGG-AGGTA  | TGAGCT     | TATTAT    | TGTAA--     | ATCACATA  | --AACCA     | CCCATTA    | GTTTTTCC  | ATT--GTGTGCTAATGGA |                   |
|                                |               |          |              |            |           |             |           |             |            |           | Section 220        |                   |
|                                | (21244)       | 21244    | 21250        | 21260      | 21270     | 21280       | 21290     | 21300       | 21310      | 21320     | 21340              |                   |
| Ad 12 X73487 (19888)           | GATGGGGAGGG   | ATACAAT  | GTGGCCCA     | ATGCAAT    | TATGACTAA | GGATTGG     | TTCTAAT   | TACAAATGC   | TTAGTCATTA | CAACATTG  | GATACCAAGGTTTTT    |                   |
| SARS-CoV-2 NC_045512.2 (16498) | CAAGTTTTTT    | GGTTAT   | ATAAAATAC    | ATGTGT     | TGGTAG    | CGATAA      | TGTTACTG  | ACTTTAA---- | TGCAATTG-- | CAACATGT  | GACTGGAACAAATGCT   |                   |
|                                |               |          |              |            |           |             |           |             |            |           | Section 221        |                   |
|                                | (21341)       | 21341    | 21350        | 21360      | 21370     | 21380       | 21390     | 21400       | 21410      | 21420     | 21437              |                   |
| Ad 12 X73487 (19985)           | ACATTCCAG     | AGAGCTA  | CAAGGACC     | GCAATGTATT | CCTTTAG   | AAACTTT     | CAGC      | CCATGA      | GTAGGC     | AAGTTGTG  | -GATACCA           | CAGAAATATAAGAACT  |
| SARS-CoV-2 NC_045512.2 (16588) | GGTGATTAC     | ATTTTAG  | CTAACACC     | TG-TACT    | GAAAGACT  | CAAGC       | TTTG      | CAGCAG      | AAACG      | CTCAAAG   | CTAC               | TGAGGAGACATTTAAAC |
|                                |               |          |              |            |           |             |           |             |            |           | Section 222        |                   |
|                                | (21438)       | 21438    | 21450        | 21460      | 21470     | 21480       | 21490     | 21500       | 21510      | 21520     | 21534              |                   |
| Ad 12 X73487 (20081)           | ACAAAAAG      | TAAACG   | TAGAGTTTCAA  | CATAACA    | ACTCAG    | GATTCT      | GGGAT     | ACCTGG      | CCCC       | ACTATGC   | GGGAGGGA           | CAAGCTTACC        |
| SARS-CoV-2 NC_045512.2 (16684) | GGTATT--      | GCTACT   | GTA          | CGTGAAGTG  | CTGTCTG   | ACAGAG      | AATTAC    | ATCTT       | ATGGGAAG   | TTGGTAA   | ACCTAGAC-----      | CACCAC            |
|                                |               |          |              |            |           |             |           |             |            |           | Section 223        |                   |
|                                | (21535)       | 21535    | 21540        | 21550      | 21560     | 21570       | 21580     | 21590       | 21600      | 21610     | 21631              |                   |
| Ad 12 X73487 (20175)           | CTATCCCT      | ACCCTCT  | TATAGGCCA    | AACAGCTGT  | -GAAAGCAT | CAACAG      | AAAGTTT   | CTATG       | CGATCG     | TGTTAT    | GTGGCGCATCCC       | ATTTTC-TA         |
| SARS-CoV-2 NC_045512.2 (16773) | TATGTCT       | TTACT    | GGTTATC      | GTGTAA     | CTAA      | AAACAG      | TAGGAGA   | -G--TACA--  | CCTTTG     | AAAAAGGTG | ACTATGGTG          | ATGCTGTG          |
|                                |               |          |              |            |           |             |           |             |            |           | Section 224        |                   |
|                                | (21632)       | 21632    | 21640        | 21650      | 21660     | 21670       | 21680     | 21690       | 21700      | 21710     | 21728              |                   |
| Ad 12 X73487 (20270)           | GTAACCTT---   | CATGTCT  | ATGGGGGCGC   | TAA        | CGGATCT   | TGGCA       | AAATAT    | TGCTGT      | TACGCA     | AAC       | T                  | CAGCCCCATGC       |
| SARS-CoV-2 NC_045512.2 (16865) | TTTACCGAGGT   | -ACAA    | CAACTTACAAAT | TAA        | ATGTTGG   | TGATTATTT   | TGTGCTG   | -ACATC      | ACATAC     | AGTA      | ATGC-----          | CATTATGAAGTGC     |



SARS-CoV-2 & Ad12.apr

|                                |                   |                   |                  |                  |                  |              |              |                      |               |                           |                       |             |                |               |      |            |
|--------------------------------|-------------------|-------------------|------------------|------------------|------------------|--------------|--------------|----------------------|---------------|---------------------------|-----------------------|-------------|----------------|---------------|------|------------|
|                                |                   |                   |                  |                  |                  |              |              |                      |               |                           | Section 225           |             |                |               |      |            |
| (21729)                        | 21729             | 21740             | 21750            | 21760            | 21770            | 21780        | 21790        | 21800                | 21810         | 21825                     |                       |             |                |               |      |            |
| Ad 12 X73487 (20363)           | ATCCAATGGATGAGGCC | TACCCCTTCTTATGTTT | TATTTGAAGTTTTTCG | ACGTGGTACGCATTTC | ACAGCCACACCGCGGC | GTCAT        | TGAAGCGGTCTA |                      |               |                           |                       |             |                |               |      |            |
| SARS-CoV-2 NC_045512.2 (16947) | ACCTA             | CACTA             | GTGCCACAAGAGC    | ACATATGTTAGAA    | TT-----          | ACTGGCTT     | TATACCCA     | ACACTCAATATCTCA--G-- | ATG--         | AGTTTCTA                  |                       |             |                |               |      |            |
|                                |                   |                   |                  |                  |                  |              |              |                      |               |                           | Section 226           |             |                |               |      |            |
| (21826)                        | 21826             | 21840             | 21850            | 21860            | 21870            | 21880        | 21890        | 21900                | 21910         | 21922                     |                       |             |                |               |      |            |
| Ad 12 X73487 (20460)           | CTGCGCACGCCCC     | TTCTCGGGCGGGT     | AACGCTACCA       | CCCTAAG          | AAG---G          | ACCTC        | --CCA        | GA-CTG               | CTG-TA        | TGGGTTCAAGCGAACAGGAGCTGA  |                       |             |                |               |      |            |
| SARS-CoV-2 NC_045512.2 (17027) | GCAATGTTGCAAA     | TTATCAA           | -----            | AAGGTTGGTA       | TGCAA            | AAGTATT      | CTACTCCAGG   | GACAC                | CTGGTAC       | TGGTAAGAGTCATTTTGCTATG    |                       |             |                |               |      |            |
|                                |                   |                   |                  |                  |                  |              |              |                      |               |                           | Section 227           |             |                |               |      |            |
| (21923)                        | 21923             | 21930             | 21940            | 21950            | 21960            | 21970        | 21980        | 21990                | 22000         | 22019                     |                       |             |                |               |      |            |
| Ad 12 X73487 (20550)           | CGGCCATTGTT       | CGAGATCT          | AGGCTGTG         | GACCTTATTT       | TT-TTGGGAAC      | CTTTGA       | CAAAC        | GTTT                 | TCCGGGTTT     | TGTGTCTCGCGACCGCTTATCATGT |                       |             |                |               |      |            |
| SARS-CoV-2 NC_045512.2 (17118) | CCTAGCTCTCT       | TACTACC           | CTTCTGCTC        | GATAGTGTAT       | TACAGCTTGCT      | CTCATG       | CGCT         | GTTGATGCAC           | TATGTAG       | AAGGCATT-AAAAATAT--TTG    |                       |             |                |               |      |            |
|                                |                   |                   |                  |                  |                  |              |              |                      |               |                           | Section 228           |             |                |               |      |            |
| (22020)                        | 22020             | 22030             | 22040            | 22050            | 22060            | 22070        | 22080        | 22090                | 22100         | 22116                     |                       |             |                |               |      |            |
| Ad 12 X73487 (20645)           | GCTATTGT          | TAA---CA          | CTGCCGGT         | -CGGAAACT        | GGGGCGTAC        | ACTGGCTGGCTT | TGGA         | TGGAA                | CCCCAATCG     | CACACTTGCTATTATTCGAT      |                       |             |                |               |      |            |
| SARS-CoV-2 NC_045512.2 (17212) | CCTATAGATA        | TAAATGT           | AGTAGAAT         | TATAC            | CTGCACGTGCT      | CGTGTAGAGTGT | TTTGAT       | TAAAT                | TCAAAGTGA     | ATTCAA                    | CATTAG-A-ACAGTAT----G |             |                |               |      |            |
|                                |                   |                   |                  |                  |                  |              |              |                      |               |                           | Section 229           |             |                |               |      |            |
| (22117)                        | 22117             | 22130             | 22140            | 22150            | 22160            | 22170        | 22180        | 22190                | 22200         | 22213                     |                       |             |                |               |      |            |
| Ad 12 X73487 (20738)           | CCATTTG           | GATTTTCTGAT       | -CAAC            | GACTAAAC         | AAATCTAT         | CA           | GTTTGAG      | TACGAAAG             | TCGTGTG       | CGCCGTAGTGC--GCTAGCGGCC   | ACTAAAGACC            |             |                |               |      |            |
| SARS-CoV-2 NC_045512.2 (17303) | TCTTTGTACT        | GTAA-ATG          | CATTGCTGAGAC     | ---GAC           | AGCA             | ---GATA      | TAGTTGTCT    | TTTGATG              | AA--ATTTCAATG | GCA                       | CAAAATTATGAT--TTG     |             |                |               |      |            |
|                                |                   |                   |                  |                  |                  |              |              |                      |               |                           | Section 230           |             |                |               |      |            |
| (22214)                        | 22214             | 22220             | 22230            | 22240            | 22250            | 22260        | 22270        | 22280                | 22290         | 22300                     | 22310                 |             |                |               |      |            |
| Ad 12 X73487 (20832)           | GATGCGT           | TACCCTAG          | AAAAGTCAAC       | CAAACTG          | TACAA            | GGACCG       | TTTCTG       | CAGCGTGC             | GGCC          | TGTTT                     | TGTTGTATGTTCTTACA     | CGCTTTACTCA |                |               |      |            |
| SARS-CoV-2 NC_045512.2 (17389) | AGTGTTGT          | TCAATGCC          | AGATTAC          | GTGTAA           | GCAC             | TATGTGTAC    | A-TTGG       | CAC--                | CTGCTCAAT     | TACCTG                    | CACACGC               | ---ACA      | TTGC-TA        | ACTAA         |      |            |
|                                |                   |                   |                  |                  |                  |              |              |                      |               |                           | Section 231           |             |                |               |      |            |
| (22311)                        | 22311             | 22320             | 22330            | 22340            | 22350            | 22360        | 22370        | 22380                | 22390         | 22407                     |                       |             |                |               |      |            |
| Ad 12 X73487 (20929)           | CTGGC             | CTGACC            | ATCCAATGG        | ATAAA            | AATCC            | CACTAT       | TGGA         | CCTACTTA             | CTGGGG        | TGCT                      | AAATTG                | TATGCTA     | CAAAGTCCTCAGGT | AGTGGGCACATTG |      |            |
| SARS-CoV-2 NC_045512.2 (17478) | GGGCA             | CAC               | TAGAA            | CCAGAAT          | ATTTC            | AATTC        | -AGTGT       | TAGTA--              | ACTTA         | -----                     | TG---                 | AAAAC       | TATAGGT        | CCAGACATGTTCC | TGGA | AACTTGTGCG |

SARS-CoV-2 & Ad12.apr

|                                |                                                                                                   |                             |                                                     |                        |             |             |                |                   |                 |             |                    |          |           |         |         |       |       |       |       |     |
|--------------------------------|---------------------------------------------------------------------------------------------------|-----------------------------|-----------------------------------------------------|------------------------|-------------|-------------|----------------|-------------------|-----------------|-------------|--------------------|----------|-----------|---------|---------|-------|-------|-------|-------|-----|
|                                |                                                                                                   |                             |                                                     |                        |             |             |                |                   |                 |             | Section 232        |          |           |         |         |       |       |       |       |     |
| (22408)                        | 22408                                                                                             | 22420                       | 22430                                               | 22440                  | 22450       | 22460       | 22470          | 22480             | 22490           | 22504       |                    |          |           |         |         |       |       |       |       |     |
| Ad 12 X73487 (21026)           | CAACGCAATCAGGAATGAATTGTATAAATTCCTTAACAATC-TGTCCTCCCTTACTT                                         | TCGT                        | CGTCAACCCGCGAGCGCATAGAAAAAGCTACATCTTT               |                        |             |             |                |                   |                 |             |                    |          |           |         |         |       |       |       |       |     |
| SARS-CoV-2 NC_045512.2 (17563) | CGTTGT--CTGCTGAATTGTGACACTGTGA---GTGCT--TTGGTTATGATTAATAAGCTTAAAGCACATAAAGACAAAATCAGCTCAATGCTTT   |                             |                                                     |                        |             |             |                |                   |                 |             |                    |          |           |         |         |       |       |       |       |     |
|                                |                                                                                                   |                             |                                                     |                        |             |             |                |                   |                 |             | Section 233        |          |           |         |         |       |       |       |       |     |
| (22505)                        | 22505                                                                                             | 22510                       | 22520                                               | 22530                  | 22540       | 22550       | 22560          | 22570             | 22580           | 22590       | 22601              |          |           |         |         |       |       |       |       |     |
| Ad 12 X73487 (21119)           | ACTAAAAATGCAAAATGGACTCAAA---TAACGTGTACACAAATTAATAAATAACCA                                         | CA----TTT                   | TATTAGC----                                         | TCATTGGAGTACAAAGCT     |             |             |                |                   |                 |             |                    |          |           |         |         |       |       |       |       |     |
| SARS-CoV-2 NC_045512.2 (17653) | AAAATGTTTATAAAGGGTGT-TATCACGCATGATGTTTCATCTGCAATTAACAGGCCACAAATAGGCGTGGTAAGAGAATTCCTTACACGT-AAACC |                             |                                                     |                        |             |             |                |                   |                 |             |                    |          |           |         |         |       |       |       |       |     |
|                                |                                                                                                   |                             |                                                     |                        |             |             |                |                   |                 |             | Section 234        |          |           |         |         |       |       |       |       |     |
| (22602)                        | 22602                                                                                             | 22610                       | 22620                                               | 22630                  | 22640       | 22650       | 22660          | 22670             | 22680           | 22698       |                    |          |           |         |         |       |       |       |       |     |
| Ad 12 X73487 (21204)           | TGACTGTTTTATTAAAAATCAAAATG-GCTCTTGCGGACAGTCGCG--TGGTTGGTGGG                                       | CAGG                        | GATATGTTTTCTGTACT-GCAA                              | ACGCTGATGCCAC          |             |             |                |                   |                 |             |                    |          |           |         |         |       |       |       |       |     |
| SARS-CoV-2 NC_045512.2 (17748) | TGCTTGGA---GAAAAGCTGTGCTTTATTTCACCTTATAATTCACAGAAATGCTGTAGCCTCAAA                                 | GATT                        | TT---GGGACTACCAA                                    | CTCAAAC                | TGTTGA      |             |                |                   |                 |             |                    |          |           |         |         |       |       |       |       |     |
|                                |                                                                                                   |                             |                                                     |                        |             |             |                |                   |                 |             | Section 235        |          |           |         |         |       |       |       |       |     |
| (22699)                        | 22699                                                                                             | 22710                       | 22720                                               | 22730                  | 22740       | 22750       | 22760          | 22770             | 22780           | 22795       |                    |          |           |         |         |       |       |       |       |     |
| Ad 12 X73487 (21297)           | TTGAATTCTGG---AATAACAAGCCTAGGGGGGGAGC---CGTCAAAATTTTC---TCC                                       | CACAGCT-GGCGCAC             | AAG----                                             | TTGCAGGGCGCCCA-        |             |             |                |                   |                 |             |                    |          |           |         |         |       |       |       |       |     |
| SARS-CoV-2 NC_045512.2 (17838) | TTCATCAGGGGCTCAGAAATATGACTA--T-GTCAATTCAC                                                         | TCAAA                       | CCACTTGAAACAGCTCACTCTTGTAATGTAAACAGATTTAATGTT-GCTAT |                        |             |             |                |                   |                 |             |                    |          |           |         |         |       |       |       |       |     |
|                                |                                                                                                   |                             |                                                     |                        |             |             |                |                   |                 |             | Section 236        |          |           |         |         |       |       |       |       |     |
| (22796)                        | 22796                                                                                             | 22810                       | 22820                                               | 22830                  | 22840       | 22850       | 22860          | 22870             | 22880           | 22892       |                    |          |           |         |         |       |       |       |       |     |
| Ad 12 X73487 (21379)           | -----TAA                                                                                          | CATCAGGAGCAGAAATCTTGAAGTCGC | AA-TTAGGGCCA--G                                     | ATTGC-CGCGCGCA         | TTTGC       | GA-TAA      | ACTGGA         | TTTGC             | GCACTGA         | AAAA        |                    |          |           |         |         |       |       |       |       |     |
| SARS-CoV-2 NC_045512.2 (17931) | TACCAGAGCAAAA-GTAGGC                                                                              | ATACTTTGCAT----             | AA                                                  | TGTCTGATAGAGACCTTTATGA | CAAG--TTTGC | AATTTACAAG  | TCTTGA--A      | ATTCC             | ACGT            |             |                    |          |           |         |         |       |       |       |       |     |
|                                |                                                                                                   |                             |                                                     |                        |             |             |                |                   |                 |             | Section 237        |          |           |         |         |       |       |       |       |     |
| (22893)                        | 22893                                                                                             | 22900                       | 22910                                               | 22920                  | 22930       | 22940       | 22950          | 22960             | 22970           | 22989       |                    |          |           |         |         |       |       |       |       |     |
| Ad 12 X73487 (21466)           | CC                                                                                                | AACA                        | AA                                                  | CACGGAT                | ACTTAAT     | ACTGGCTAA   | CGCTCCAGGGT    | CGGTTACTTCGTTG    | ATA             | TCAATGTTATC | CACATTGCT--GAGGTTA | AAAGG    | AGTG      |         |         |       |       |       |       |     |
| SARS-CoV-2 NC_045512.2 (18019) | --                                                                                                | AGG-AA                      | TGTGGCA                                             | ACTTTACA               | AGCTGA      | AAATGTAAACA | GGACTCTTTAAAGA | TTGTAGT--AAGGTAAT | CAC             | TGGTTACATCC | TAC                | A        | AGG       | C-AC    |         |       |       |       |       |     |
|                                |                                                                                                   |                             |                                                     |                        |             |             |                |                   |                 |             | Section 238        |          |           |         |         |       |       |       |       |     |
| (22990)                        | 22990                                                                                             | 23000                       | 23010                                               | 23020                  | 23030       | 23040       | 23050          | 23060             | 23070           | 23086       |                    |          |           |         |         |       |       |       |       |     |
| Ad 12 X73487 (21561)           | ATTT                                                                                              | TACACA                      | -----                                               | GTTGAC                 | G           | CCCC        | AT             | C                 | GTGGCAGGCCATCTT | GCTTGT      | TAAACA             | TT       | CGCAGCGCA | CTGGCAT | ----    | AAGGA | G     | AGTTT | TG    |     |
| SARS-CoV-2 NC_045512.2 (18110) | ---C                                                                                              | TACACA                      | CCTCAGT                                             | GTTGAC                 | A           | TAA         | AT             | C                 | AAAACT-----     | GAAG        | GT                 | TATGT--G | TTGA      | CAT--AC | CTGGCAT | ACCT  | AAGGA | CAT   | GACCT | TAT |

SARS-CoV-2 & Ad12.apr

| Section 239                    |         |            |             |             |                |             |              |                   |                   |                          |                      |     |
|--------------------------------|---------|------------|-------------|-------------|----------------|-------------|--------------|-------------------|-------------------|--------------------------|----------------------|-----|
|                                | (23087) | 23087      | 23100       | 23110       | 23120          | 23130       | 23140        | 23150             | 23160             | 23170 23183              |                      |     |
| Ad 12 X73487 (21647)           |         | CCCATGTCG  | CATGTGAGG   | GTAGTCGG    | CCAGCATA       | AAAAGC--T   | TCAATTT      | GCCTAAAAG         | CTATTTGAGC        | CTTCATTTCCTTCAGAAATAAAAC | AAGCCGC              |     |
| SARS-CoV-2 NC_045512.2 (18193) |         | AGAAGACT-  | CATCTCTAT   | GA--TGG     | GGTTTAA        | AAATGAATTA- | TCAA         | GTTAATGGTTAC      | CTA---A--CAT      | GTT-TATCA                | CCCGCGAAGAAGCTAT     |     |
| Section 240                    |         |            |             |             |                |             |              |                   |                   |                          |                      |     |
|                                | (23184) | 23184      | 23190       | 23200       | 23210          | 23220       | 23230        | 23240             | 23250             | 23260 23270 23280        |                      |     |
| Ad 12 X73487 (21747)           |         | AGGACTTT   | TCCGGAGAA   | GAATTATTCC  | CGCAGCCAA      | CATCATGA    | AAACAGC      | AGCGGCATC         | GTCTGTT           | TTTTAATTTGAACTAC         | ATTACGCCCCAGCG       |     |
| SARS-CoV-2 NC_045512.2 (18279) |         | AAGACAT    | TGTACGTGCAT | GATTGGCTT   | CGATGTCG       | AGGGGTGTC   | ATGCTAG      | AGAGCTGTTG        | TACCAATTT         | -----ACCTT               | TACAGCTAGGTT         |     |
| Section 241                    |         |            |             |             |                |             |              |                   |                   |                          |                      |     |
|                                | (23281) | 23281      | 23290       | 23300       | 23310          | 23320       | 23330        | 23340             | 23350             | 23360 23377              |                      |     |
| Ad 12 X73487 (21839)           |         | GTTTTCG    | CCACC       | TTGGCTTTCG  | AGGGTTC-T      | CTTTCAACGC  | TCGTTG       | CCACTTT           | TCGCTGGTTAC       | ATCCATTTCCACCA           | AATGCTCTTTGCGCAC     |     |
| SARS-CoV-2 NC_045512.2 (18371) |         | TTTCTA     | CAGG-TGTTAA | CTAGTTGCTGT | ACCTACAGGTTATG | TGATAC      | ACCTAA       | TAATA--C          | AGATTTT           | TCCAGAGTTAG--            | TGCTAAACCAC          |     |
| Section 242                    |         |            |             |             |                |             |              |                   |                   |                          |                      |     |
|                                | (23378) | 23378      | 23390       | 23400       | 23410          | 23420       | 23430        | 23440             | 23450             | 23460 23474              |                      |     |
| Ad 12 X73487 (21935)           |         | CATCTCC    | ATTCATGC    | AGGCATCTAA  | AGCTCCCTTCG    | C-----GCT   | CGGTAC       | ACTTATGCTCCC--    | ACACGCAGCA        | ACCGGTGGGTCTCCAGGAAT     |                      |     |
| SARS-CoV-2 NC_045512.2 (18461) |         | CGCCTGG    | AGATCA----- | ATTAAACA    | CCCTCATAC      | CACTTATG    | TACAAAGG     | ACTTCCTTGAATGTAGT | GC                | GTATAA-AGATTGTAC----     | AAT                  |     |
| Section 243                    |         |            |             |             |                |             |              |                   |                   |                          |                      |     |
|                                | (23475) | 23475      | 23480       | 23490       | 23500          | 23510       | 23520        | 23530             | 23540             | 23550 23560 23571        |                      |     |
| Ad 12 X73487 (22024)           |         | TCGTGTG    | GACACCGGCA  | -TAA        | GCTTG          | CATATATCC   | TGCA         | AAAAGCGT          | CCCATGAGCT        | CCTGAAAGGTTTTTTTG        | GGATGAAAAAGTC-AGCTGC | AA  |
| SARS-CoV-2 NC_045512.2 (18546) |         | GTAAAGT    | GACACACTT   | AAAAATCT    | CTCTGAC        | AGAGT       | CGTATTTGT--- | CTTATGGGC         | ACATGGCTTTGA-G    | TTGACATCTATG             | AAGTATTTTGTGAA       |     |
| Section 244                    |         |            |             |             |                |             |              |                   |                   |                          |                      |     |
|                                | (23572) | 23572      | 23580       | 23590       | 23600          | 23610       | 23620        | 23630             | 23640             | 23650 23668              |                      |     |
| Ad 12 X73487 (22119)           |         | CCGCCTTTT  | CTTCGTTG    | AGCCATG--T  | TGTGCATATTTTC  | TGTACA      | CCTGCC       | CTGATCCGG         | CAAAAACG          | AAAGGTGGCGCGCT           | CGTCGTGATC           |     |
| SARS-CoV-2 NC_045512.2 (18639) |         | AATAGGAC-- | CTGAGCGC    | ACCTGTTGTC  | TATGTGATAGACG  | TGCC        | ACATGCTTTT   | CCACTGCTT         | CAGACACTTATGCC--- | TGTTGGCATCAT             | TTCTA                |     |
| Section 245                    |         |            |             |             |                |             |              |                   |                   |                          |                      |     |
|                                | (23669) | 23669      | 23680       | 23690       | 23700          | 23710       | 23720        | 23730             | 23740             | 23750 23765              |                      |     |
| Ad 12 X73487 (22214)           |         | CACATGGTAC | TTTT--C     | ATTAGCA--   | TAGCCAT-       | GGCTTC      | ---ATGCCTT   | TTTCC             | CAGCTGAAA         | CTAGGGGCTGGCTTGCCGGAT    | TGCGAA               | CAA |
| SARS-CoV-2 NC_045512.2 (18731) |         | TTGGATTG   | ATTACGT     | CTATAAT     | CCGTTATATG     | ATGATGTT    | CAACAATGGGG  | TTT               | TACAGG--T         | AACCTACAAAGCAAC          | CATGATCTGTATTGT      | CAA |

SARS-CoV-2 & Ad12.apr

|                                |                                |          |        |        |        |        |          |       |              |             |          |        |         |        |        |        |           |       |             |           |         |       |      |                  |        |            |          |      |     |     |   |      |
|--------------------------------|--------------------------------|----------|--------|--------|--------|--------|----------|-------|--------------|-------------|----------|--------|---------|--------|--------|--------|-----------|-------|-------------|-----------|---------|-------|------|------------------|--------|------------|----------|------|-----|-----|---|------|
|                                |                                |          |        |        |        |        |          |       |              | Section 246 |          |        |         |        |        |        |           |       |             |           |         |       |      |                  |        |            |          |      |     |     |   |      |
| (23766)                        | 23766                          | 23780    | 23790  | 23800  | 23810  | 23820  | 23830    | 23840 | 23850        | 23862       |          |        |         |        |        |        |           |       |             |           |         |       |      |                  |        |            |          |      |     |     |   |      |
| Ad 12 X73487 (22303)           | CAA                            | CAACAT   | TTC    | TTTT   | CATT   | TTTCG  | TCGC     | TGT   | TTT          | TGAGCGGA    | AAGC     | ----   | TTCAAA  | -AC    | GTGT   | AC     | CTG       | CCTGG | TTT         | -CCATT    | TT      | TTGA  | AAA  | GACT             | G----  |            |          |      |     |     |   |      |
| SARS-CoV-2 NC_045512.2 (18826) | GTC                            | CATGG    | TAA    | TGCA   | CATG   | TAGC   | TAG      | TGT   | GATG         | CAAT        | CATG     | ACTAGG | TGTCT   | AGCT   | GTCC   | AC     | GAG       | TGCTT | TGT         | TAAGCG    | TG      | TTGA  | CTG  | GACT             | ATTG   |            |          |      |     |     |   |      |
|                                |                                |          |        |        |        |        |          |       |              | Section 247 |          |        |         |        |        |        |           |       |             |           |         |       |      |                  |        |            |          |      |     |     |   |      |
| (23863)                        | 23863                          | 23870    | 23880  | 23890  | 23900  | 23910  | 23920    | 23930 | 23940        | 23959       |          |        |         |        |        |        |           |       |             |           |         |       |      |                  |        |            |          |      |     |     |   |      |
| Ad 12 X73487 (22391)           | -                              | AGA      | ----   | ACCG   | TCTGC  | -      | ATGA     | TGCAT | A-           | ATGCGGA     | CGG      | GCGG   | CAT     | ---    | GTG    | AA     | C         | CAT   | TAC         | TCC       | TAAA    | A     | CTGC | TCT              | TGGT   | G          | GTTCTG   | CCT  | TCT | C   |   |      |
| SARS-CoV-2 NC_045512.2 (18923) | A                              | ATA      | TCCT   | ATAA   | TG     | GTG    | ATGA     | ACTGA | AG           | AT          | TAATG    | CGG    | CTTGT   | AGAAA  | GGTTC  | AAC    | A         | CAT   | GGT         | TGT       | TAAA    | G     | CTGC | AT               | TATTAG | G          | CAGACAAA | T    | TCC | C   |   |      |
|                                |                                |          |        |        |        |        |          |       |              | Section 248 |          |        |         |        |        |        |           |       |             |           |         |       |      |                  |        |            |          |      |     |     |   |      |
| (23960)                        | 23960                          | 23970    | 23980  | 23990  | 24000  | 24010  | 24020    | 24030 | 24040        | 24056       |          |        |         |        |        |        |           |       |             |           |         |       |      |                  |        |            |          |      |     |     |   |      |
| Ad 12 X73487 (22478)           | TTC                            | TCT      | TGCACT | CTC    | TGG    | GGAAAG | ---      | AGG   | TAT          | CGCAGCCAT   | -----    | AG     | ATT     | -      | TCT    | TGAC   | TTTT      | --    | TTCT        | T         | TG      | ----- | ---  | AG               | GT     | AAA        | ---      |      |     |     |   |      |
| SARS-CoV-2 NC_045512.2 (19020) | AGT                            | TCT      | TCACGA | CAT    | TGG    | TA     | ACCCTAA  | AG    | C            | TAT         | TAAGTGTG | T      | ACCTCA  | AG     | C      | T      | GAT       | TG    | TAGAA       | T         | GGAAG   | TTCT  | A    | TGATGCACAGCCTTGT | AG     | TG         | A        | CAA  |     |     |   |      |
|                                |                                |          |        |        |        |        |          |       |              | Section 249 |          |        |         |        |        |        |           |       |             |           |         |       |      |                  |        |            |          |      |     |     |   |      |
| (24057)                        | 24057                          | 24070    | 24080  | 24090  | 24100  | 24110  | 24120    | 24130 | 24140        | 24153       |          |        |         |        |        |        |           |       |             |           |         |       |      |                  |        |            |          |      |     |     |   |      |
| Ad 12 X73487 (22548)           | -----                          | G        | CACA   | ---    | GCT    | TCCAGT | -----    | T     | CTT          | CTTCGCT     | TCGG     | AAT    | C       | CAGAAA | --     | GT     | ATC       | TGCC  | C           | ATTTT     | T       | --    | GGC  | G                | CGGG   | CGGCTG     | AG       |      |     |     |   |      |
| SARS-CoV-2 NC_045512.2 (19117) | GCTTATAAAATA                   | GA       | GA     | AATTAT | TCTA   | --     | TCTTTATG | G     | CAC          | ACATTC      | T        | GACA   | AAT     | T      | CA     | CAGATG | GT        | G     | TAT         | TGCC      | T       | ATTTT | T    | GGAATT           | G      | CAATGTCGAT | AG       |      |     |     |   |      |
|                                |                                |          |        |        |        |        |          |       |              | Section 250 |          |        |         |        |        |        |           |       |             |           |         |       |      |                  |        |            |          |      |     |     |   |      |
| (24154)                        | 24154                          | 24160    | 24170  | 24180  | 24190  | 24200  | 24210    | 24220 | 24230        | 24240       | 24250    |        |         |        |        |        |           |       |             |           |         |       |      |                  |        |            |          |      |     |     |   |      |
| Ad 12 X73487 (22621)           | -----                          | -----    | -----  | -----  | CG     | CTGC   | -G       | CTC   | TG           | GGG         | --       | TGCG   | CT      | CCCTC  | TG     | TGAG   | TGCTGAT   | TG    | CTGGC       | CA        | TT      | AT    | T    | TAAT             | CCTAGG |            |          |      |     |     |   |      |
| SARS-CoV-2 NC_045512.2 (19212) | ATATCCTGCTAATTCCATTGTTTGTAGATT | TG       | ACTA   | -      | GAG    | TG     | CTATC    | T     | AAC          | CT          | TAACT    | TG     | CCT     | G      | TTGTGA | TG     | TGGCAG    | TT    | TG          | TATG      | TAAATAA |       |      |                  |        |            |          |      |     |     |   |      |
|                                |                                |          |        |        |        |        |          |       |              | Section 251 |          |        |         |        |        |        |           |       |             |           |         |       |      |                  |        |            |          |      |     |     |   |      |
| (24251)                        | 24251                          | 24260    | 24270  | 24280  | 24290  | 24300  | 24310    | 24320 | 24330        | 24347       |          |        |         |        |        |        |           |       |             |           |         |       |      |                  |        |            |          |      |     |     |   |      |
| Ad 12 X73487 (22684)           | CA                             | AAGAAACA | CAT    | GATGGA | -      | TCT    | G--      | GAGCC | A            | CAG         | GAAAGC   | TTAA   | CCGCCC  | -      | CA     | CCG    | C--       | TCCCG | C           | ATTGGCGCT | AC      | G     | CTGT | CAT              | GGA    | -          | GAAGG    |      |     |     |   |      |
| SARS-CoV-2 NC_045512.2 (19308) | AC                             | ATGC     | ATTC   | CA     | CACACC | AGCT   | TTGATAAA | AGT   | G            | CTTTT       | TG       | TTAA   | TTTAAAA | CA     | ATTAC  | CAT    | TTTTT     | CT    | ATT         | ACTCTG    | AC      | AGT   | --   | C                | CATG   | TGA        | G        | TCTC |     |     |   |      |
|                                |                                |          |        |        |        |        |          |       |              | Section 252 |          |        |         |        |        |        |           |       |             |           |         |       |      |                  |        |            |          |      |     |     |   |      |
| (24348)                        | 24348                          | 24360    | 24370  | 24380  | 24390  | 24400  | 24410    | 24420 | 24430        | 24444       |          |        |         |        |        |        |           |       |             |           |         |       |      |                  |        |            |          |      |     |     |   |      |
| Ad 12 X73487 (22774)           | A                              | CAAAA    | GT     | CT     | ACT    | CAT    | -----    | A     | CCCC         | ----        | AAG      | A      | G       | CACCG  | GT     | ---    | G         | AGCA  | GAA         | C         | -----   | T     | TG   | -----            | GG     | CTAC       | G        | AGAC | T   | CCC | C | CCGA |
| SARS-CoV-2 NC_045512.2 (19403) | ATGG                           | AAAA     | CA     | AG     | TAG    | T      | GTCAGAT  | A     | TAGATTATGTAC | C           | ACT      | AAAGT  | CTGCT   | ACGT   | G      | T      | ATAACACGT | T     | GCAATTTAGGT | GG        | TGCT    | G     | TCTG | TAG              | C      | ATCA       |          |      |     |     |   |      |

SARS-CoV-2 & Ad12.apr

|                                |           |          |          |        |            |          |         |          |           |          |           |           |           |          |          |         |          |        |       |       |        |       |       |       |       |     |      |    |      |     |         |
|--------------------------------|-----------|----------|----------|--------|------------|----------|---------|----------|-----------|----------|-----------|-----------|-----------|----------|----------|---------|----------|--------|-------|-------|--------|-------|-------|-------|-------|-----|------|----|------|-----|---------|
| Section 253                    |           |          |          |        |            |          |         |          |           |          |           |           |           |          |          |         |          |        |       |       |        |       |       |       |       |     |      |    |      |     |         |
| (24445)                        | 24445     | 24450    | 24460    | 24470  | 24480      | 24490    | 24500   | 24510    | 24520     | 24530    | 24541     |           |           |          |          |         |          |        |       |       |        |       |       |       |       |     |      |    |      |     |         |
| Ad 12 X73487 (22841)           | GGAATT    | TGAAGG   | CTTTC    | TTCAAA | TCGA       | -----AA  | AGCAA   | C---CAAA | TGAGC     | AAA---AC | GCTGGGCTC | GAGGAC    | -----CATG | --ACTACC | TAAAC    |         |          |        |       |       |        |       |       |       |       |     |      |    |      |     |         |
| SARS-CoV-2 NC_045512.2 (19500) | TGCTAA    | TGA      | GTA      | CAGAT  | TGTATC     | TCGATG   | CTTA    | TAACA    | TGATGA    | ATCTCAGC | TGGCTTTA  | GCTTG     | -TGG      | GTTTAC   | AAACAATT | TGAT-AC | TTA      | TAAAC  |       |       |        |       |       |       |       |     |      |    |      |     |         |
| Section 254                    |           |          |          |        |            |          |         |          |           |          |           |           |           |          |          |         |          |        |       |       |        |       |       |       |       |     |      |    |      |     |         |
| (24542)                        | 24542     | 24550    | 24560    | 24570  | 24580      | 24590    | 24600   | 24610    | 24620     | 24638    |           |           |           |          |          |         |          |        |       |       |        |       |       |       |       |     |      |    |      |     |         |
| Ad 12 X73487 (22920)           | GAGGGA    | GATGTCC  | TGTTT    | AAACAT | TCTAC      | AGCGACA  | AAAGCA  | CTATCG   | TTTCGCG   | ACGCCA   | TATCTG    | ATCG      | C-----TCT | TCAATAC  | CAGTTT   | TCAAT   | -TG      |        |       |       |        |       |       |       |       |     |      |    |      |     |         |
| SARS-CoV-2 NC_045512.2 (19595) | TCTGGA    | -ACACT-  | TTTAC    | AAAGAC | TTCAG      | AGTTTAG  | AA--AAT | CTGCT    | TTTAAT    | GTTG     | TAAAT     | TAAGG     | GACACTT   | TGAT     | TGGACA   | ACAG    | GGTGA    | GTAC   |       |       |        |       |       |       |       |     |      |    |      |     |         |
| Section 255                    |           |          |          |        |            |          |         |          |           |          |           |           |           |          |          |         |          |        |       |       |        |       |       |       |       |     |      |    |      |     |         |
| (24639)                        | 24639     | 24650    | 24660    | 24670  | 24680      | 24690    | 24700   | 24710    | 24720     | 24735    |           |           |           |          |          |         |          |        |       |       |        |       |       |       |       |     |      |    |      |     |         |
| Ad 12 X73487 (23011)           | CAGAAC    | TAT--CT  | TGCATC   | TACGA  | ACGCAAC    | CTGTTCT  | CCCCAC  | GTGTG    | CCCC      | TAAACG   | -GCAAG    | CCAA      | CGGC      | ACATG    | CGAGCC   | ---AAT  | CCTCG    |        |       |       |        |       |       |       |       |     |      |    |      |     |         |
| SARS-CoV-2 NC_045512.2 (19688) | CAGTT-TCT | TATCAT   | TAA--ATA | CACTG  | TTTACACAAA | AGTTGAT  | GTTG    | TGATG    | TAGA      | ATTG     | TTTG      | GAAA      | TAAAACA   | ACATTA   | CC       | TGTT    | AATGTAGC |        |       |       |        |       |       |       |       |     |      |    |      |     |         |
| Section 256                    |           |          |          |        |            |          |         |          |           |          |           |           |           |          |          |         |          |        |       |       |        |       |       |       |       |     |      |    |      |     |         |
| (24736)                        | 24736     | 24750    | 24760    | 24770  | 24780      | 24790    | 24800   | 24810    | 24820     | 24832    |           |           |           |          |          |         |          |        |       |       |        |       |       |       |       |     |      |    |      |     |         |
| Ad 12 X73487 (23107)           | CCTTAA    | CT-TCTAC | CCAG     | TTTTT  | TGCAG      | TG--CCAG | AAGCA   | CTGG     | -CAACATAC | CATAT    | TTTCT     | TTTAAAA   | AATC      | AAAA     | TACCCC   | TATCC   | TGTCGAGC |        |       |       |        |       |       |       |       |     |      |    |      |     |         |
| SARS-CoV-2 NC_045512.2 (19782) | ATTTGA    | AGCTTT   | GGGCTA   | AGCGCA | CATTAAA    | CCAGTAC  | CAGAGG  | TGAAA    | AATAC     | TCAAT    | AAAT      | TGGGT     | TGTG      | GACATT   | TGCTAA   | TACTG   | TGATCTGG |        |       |       |        |       |       |       |       |     |      |    |      |     |         |
| Section 257                    |           |          |          |        |            |          |         |          |           |          |           |           |           |          |          |         |          |        |       |       |        |       |       |       |       |     |      |    |      |     |         |
| (24833)                        | 24833     | 24840    | 24850    | 24860  | 24870      | 24880    | 24890   | 24900    | 24910     | 24929    |           |           |           |          |          |         |          |        |       |       |        |       |       |       |       |     |      |    |      |     |         |
| Ad 12 X73487 (23195)           | TAAACCGC  | AGCCG    | CGCAG    | ATGAGC | TTC        | TGCTTTA  | AGGGC   | TGGC     | ---GC     | TTCC     | CATAC     | CTGG      | ATTGT     | GTCT     | CCTGG    | AAGAGG  | TGCCTAA  | AATTTT | TTGA  | AA    |        |       |       |       |       |     |      |    |      |     |         |
| SARS-CoV-2 NC_045512.2 (19879) | GACTACA   | AAAG     | AGATG    | CTCC   | AGCACA     | TATATC   | TA-CTAT | TGG      | TGTTG     | TTCTAT   | GA        | CTG       | ACAT--AGC | CAAGAA   | ACC      | AAC     | TGAA     | ACG    | ATTTG | TGCAC |        |       |       |       |       |     |      |    |      |     |         |
| Section 258                    |           |          |          |        |            |          |         |          |           |          |           |           |           |          |          |         |          |        |       |       |        |       |       |       |       |     |      |    |      |     |         |
| (24930)                        | 24930     | 24940    | 24950    | 24960  | 24970      | 24980    | 24990   | 25000    | 25010     | 25026    |           |           |           |          |          |         |          |        |       |       |        |       |       |       |       |     |      |    |      |     |         |
| Ad 12 X73487 (23289)           | GGTTT     | AGGTC    | GGGAT    | TGAA   | AAACG      | AGCAG    | CAAA    | ATGCT    | CTG       | CAAAA    | AAGAA     | -----AATG | AA        | CAAA     | AAT      | CACCA   | TGGG     | AA     | TAGT  | GCTCT | AATAGA | ACT   | TGGA  |       |       |     |      |    |      |     |         |
| SARS-CoV-2 NC_045512.2 (19973) | CAC       | TC       | ACTGT    | CTTT   | TTTG       | ATGGT    | AGAGT   | TGATG    | GTCAAG    | TA       | GA        | CTT       | ATTTAG    | AATG     | CCCGT    | AAT     | GGTGT    | TCTT   | ATTA  | CAGA  | ---AGG | TAGT  | TTAA  |       |       |     |      |    |      |     |         |
| Section 259                    |           |          |          |        |            |          |         |          |           |          |           |           |           |          |          |         |          |        |       |       |        |       |       |       |       |     |      |    |      |     |         |
| (25027)                        | 25027     | 25040    | 25050    | 25060  | 25070      | 25080    | 25090   | 25100    | 25110     | 25123    |           |           |           |          |          |         |          |        |       |       |        |       |       |       |       |     |      |    |      |     |         |
| Ad 12 X73487 (23381)           | AGGT      | -G       | ACAA     | TGC    | CCGC       | CTG      | GCA     | GT       | TTT       | AAA      | GCG       | CAA       | TAT       | TG       | ----     | AGGT    | AT       | TCAC   | TT    | TG    | -CCT   | ACCCG | GC    | GTAAA | TCTT  | CCG | CCAA | AA | GGTA | ATG |         |
| SARS-CoV-2 NC_045512.2 (20067) | AGGT      | TT       | ACAA     | ---    | CCAT       | CTG      | TAG     | GT       | CCC       | AAA      | ---       | CAAG      | CT        | AGT      | CTT      | AT      | TGG      | AG     | TCAC  | ATT   | AAT    | TGG   | GAGAA | GC    | GTAAA | AA  | CA   | AG | TTT  | AA  | TTATTAT |

SARS-CoV-2 & Ad12.apr

|                                |       |            |           |          |          |          |                |            |         |              |             |           |            |              |          |              |           |        |
|--------------------------------|-------|------------|-----------|----------|----------|----------|----------------|------------|---------|--------------|-------------|-----------|------------|--------------|----------|--------------|-----------|--------|
|                                |       |            |           |          |          |          |                |            |         |              | Section 260 |           |            |              |          |              |           |        |
| (25124)                        | 25124 | 25130      | 25140     | 25150    | 25160    | 25170    | 25180          | 25190      | 25200   | 25210        | 25220       |           |            |              |          |              |           |        |
| Ad 12 X73487 (23472)           | AGCGC | AGTGA      | TGAATCAG  | CTACTAA  | ATTAA    | GCGAGCCC | AACCC          | ATTGACAA   | --AGAT  | TGCAAA       | CTTGCAAGA   | CCCGGAGGC | AACAG      | ATGATGG      | AAA      | GCC          |           |        |
| SARS-CoV-2 NC_045512.2 (20158) | AAGAA | AGT--      | TGATGGT   | GTTGTCC  | AACAA    | TTACCTGA | AAC            | CTTACTT    | ACTT    | TACTCAGAG    | TAGAA       | ATTTA     | CAAGATTT   | A---         | AACCC    | AGGAGTCA     | AAA       | TGG    |
|                                |       |            |           |          |          |          |                |            |         |              | Section 261 |           |            |              |          |              |           |        |
| (25221)                        | 25221 | 25230      | 25240     | 25250    | 25260    | 25270    | 25280          | 25290      | 25300   | 25317        |             |           |            |              |          |              |           |        |
| Ad 12 X73487 (23567)           | G-G   | TTGTAAGCGA | C         | GAGCA    | AATTA    | ACTAAG   | TGGT           | TGGGAAC    | AGACA   | ATTCCAAC     | GAAC        | TACAA     | CAGC       | GGCGTAA      | AC-T     | CATGATGGCCGC | CGTAC     | -TT    |
| SARS-CoV-2 NC_045512.2 (20249) | AAA   | TTG---     | ATTTCTTAG | AATTA    | GCTATG   | -GATGA   | ----           | ATTCA      | TTGAA   | -CGG---      | TATAA       | ATTAGAA   | GGCTATGC   | CTTCGAACATAT | CGT      | TTTATG       |           |        |
|                                |       |            |           |          |          |          |                |            |         |              | Section 262 |           |            |              |          |              |           |        |
| (25318)                        | 25318 | 25330      | 25340     | 25350    | 25360    | 25370    | 25380          | 25390      | 25400   | 25414        |             |           |            |              |          |              |           |        |
| Ad 12 X73487 (23661)           | GTA   | ACTGTGGAAC | TCGAGT    | GCATGCAT | -CGTT    | TTTTCTC  | GGACATCACCACAT | TGCGCA     | AAAA    | TTG-AGG      | ----        | AATGCTT   | CTACTAC    | ACTTTCCGCC   |          |              |           |        |
| SARS-CoV-2 NC_045512.2 (20333) | GAG   | ATTTTAGTCA | TAGTCA    | GT-TAGGT | G---     | TTTACAT  | CTACTGATTGGAC  | TAGCTAA    | ACGTTT  | TAAAGGAATC   | ACCTTT      | TGAAT-T   | AGAAGATTTT |              |          |              |           |        |
|                                |       |            |           |          |          |          |                |            |         |              | Section 263 |           |            |              |          |              |           |        |
| (25415)                        | 25415 | 25420      | 25430     | 25440    | 25450    | 25460    | 25470          | 25480      | 25490   | 25500        | 25511       |           |            |              |          |              |           |        |
| Ad 12 X73487 (23752)           | ATGG  | CTACGTG    | CGCCAGCC  | TGTAAA   | ATTCTAAT | GTGGAG   | CTGAGCAA       | CTAGTT     | TCTTAC  | ATGGGCATCT   | TG--CATG    | AAAAACCG  | ATTGGGAC   | AG           |          |              |           |        |
| SARS-CoV-2 NC_045512.2 (20425) | ATT   | CTATGGA    | CAGTACAGT | TAAAA    | CTATTCTA | TACAG    | ATGCGCAA       | ACAG       | GTTCA   | TCTAAGT      | GTGTGTG     | TTCTGT    | TATTGA     | TTTTATT      | ACTTGAT  |              |           |        |
|                                |       |            |           |          |          |          |                |            |         |              | Section 264 |           |            |              |          |              |           |        |
| (25512)                        | 25512 | 25520      | 25530     | 25540    | 25550    | 25560    | 25570          | 25580      | 25590   | 25608        |             |           |            |              |          |              |           |        |
| Ad 12 X73487 (23847)           | AACG  | TGCTAC     | ACTCAACA  | CTACG    | CGATGA   | AGCA-C   | GCAGAGAT       | TACGTG     | CGA-GAC | TGCATTTACCTT | TTCTCT      | GTTAC     | ATACCT     | TGGCAA       | ACTGG    | GAT          |           |        |
| SARS-CoV-2 NC_045512.2 (20521) | GATT  | TTGTTGA    | AAATAAA   | TCCAA    | GATTTAT  | CTG----- | TAGTT          | CTTAAGGT   | TG----- | TCAAA        | GTGAC---    | TATTGACT  | ATACAGAA   |              |          |              |           |        |
|                                |       |            |           |          |          |          |                |            |         |              | Section 265 |           |            |              |          |              |           |        |
| (25609)                        | 25609 | 25620      | 25630     | 25640    | 25650    | 25660    | 25670          | 25680      | 25690   | 25705        |             |           |            |              |          |              |           |        |
| Ad 12 X73487 (23942)           | GGG   | TGT        | TTGGCAGC  | AATGC    | TTGG     | AAGAAA   | AAACCTT        | CGA        | AACTAA  | ACAAAC       | -TGT        | TAGAC     | AGAC       | TAA          | AATCCCTA | TGG          | ACCGGTTTT | TGACGA |
| SARS-CoV-2 NC_045512.2 (20599) | ATT   | TCA        | TT-----   | TATGCT   | TTGG     | TGTA--   | AAAGATGGC      | CATGT----- | AGAAAC  | AT--TTT      | ACCC        | AAAAT     | TACAAT--   | CTAGTCA      | ---AGCG  | TGGCAA       |           |        |
|                                |       |            |           |          |          |          |                |            |         |              | Section 266 |           |            |              |          |              |           |        |
| (25706)                        | 25706 | 25720      | 25730     | 25740    | 25750    | 25760    | 25770          | 25780      | 25790   | 25802        |             |           |            |              |          |              |           |        |
| Ad 12 X73487 (24038)           | A     | CGGACAGTA  | GCTGC     | AGAGCTA  | GCTGA    | CAT      | AATTTT         | CCAGAA     | AAGGTT  | AAATGA       | TAACT       | TGCA      | AAAC       | GGCTTG       | CCTG     | ACTTTATGAGTC | AAAGT     | TATG   |
| SARS-CoV-2 NC_045512.2 (20677) | C     | CGG        | GT---     | GTGCT--- | ATGC     | CTA-AT-- | CTTAC          | AAAATGC--- | AAAGA   | ATGCTATT     | TAG         | AAAAG     | TGTGA      | CCTTC        | -----A   | AAATATG      |           |        |

SARS-CoV-2 & Ad12.apr

[illegible]

## SARS-CoV-2 &amp; Ad12.apr

|                                |            |           |          |          |             |           |          |          |            |               |                |               |        |             |             |            |           |
|--------------------------------|------------|-----------|----------|----------|-------------|-----------|----------|----------|------------|---------------|----------------|---------------|--------|-------------|-------------|------------|-----------|
|                                |            |           |          |          |             |           |          |          |            |               | Section 274    |               |        |             |             |            |           |
| (26482)                        | 26482      | 26490     | 26500    | 26510    | 26520       | 26530     | 26540    | 26550    | 26560      | 26578         |                |               |        |             |             |            |           |
| Ad 12 X73487 (24787)           | GCTATTG    | CGCAGCAA  | CGCTCAAA | GAAA-C   | AGCAGCAACGG | CAGGAAAT  | CTGGAGG  | AGAAATCT | TTGGGAGAGT | CAGGCAGAGG    | TCGAGGAC       |               |        |             |             |            |           |
| SARS-CoV-2 NC_045512.2 (21375) | G-TCTTC    | CT---ATT  | CTTTATTT | GACATG   | AGTAATTTCC  | CTTAAAT   | TAAAGGG  | TACTGC   | TGTTATG    | TCTTTAA--     | AGAAGGTC       | AAATCATGAT    |        |             |             |            |           |
|                                |            |           |          |          |             |           |          |          |            |               | Section 275    |               |        |             |             |            |           |
| (26579)                        | 26579      | 26590     | 26600    | 26610    | 26620       | 26630     | 26640    | 26650    | 26660      | 26675         |                |               |        |             |             |            |           |
| Ad 12 X73487 (24883)           | TTGGAAGAAT | GGGAGGAGG | AGGCGGA  | CAGCCTAG | ACGAGGAT    | TCCAGAGG  | AGGAGGAG | AGGTTCC  | AAAGGACG   | GAGCG--ACC--- | GCCGCCA        |               |        |             |             |            |           |
| SARS-CoV-2 NC_045512.2 (21466) | ATG-----   | ATTTT     | ATCTCTT  | CTTAGTA  | AGGTAGA     | -----CTT  | ATAATTAG | AGAG     | -----A     | ACAACAGAG     | TTGTTATTTCTAGT | GATG          |        |             |             |            |           |
|                                |            |           |          |          |             |           |          |          |            |               | Section 276    |               |        |             |             |            |           |
| (26676)                        | 26676      | 26690     | 26700    | 26710    | 26720       | 26730     | 26740    | 26750    | 26760      | 26772         |                |               |        |             |             |            |           |
| Ad 12 X73487 (24974)           | AAACGTCGCT | TTTCAACC  | AAAGCCT  | CTCCAA   | TGAAACC     | ---CGCT   | TGTGAGCA | AAATC--- | TCAGAAAG   | CCAACCGTAG    | ATGGGACACC     | ATTGAAC       |        |             |             |            |           |
| SARS-CoV-2 NC_045512.2 (21539) | TTCTTGTTA  | ACAAC     | CT--AA   | AGAAC    | AATGTT      | TGTTTTTCT | TGTTTATT | GCACCT   | AGTCTCT    | AGTCAGTGT     | --GTTAATCTT    | ACA--ACCAGAAC |        |             |             |            |           |
|                                |            |           |          |          |             |           |          |          |            |               | Section 277    |               |        |             |             |            |           |
| (26773)                        | 26773      | 26780     | 26790    | 26800    | 26810       | 26820     | 26830    | 26840    | 26850      | 26869         |                |               |        |             |             |            |           |
| Ad 12 X73487 (25063)           | -AGCGC     | CGCAA     | ACTTG    | GTAA     | GA--AT      | CGCAAG    | CAGGCG   | CGTCGGGG | CTACTG     | CTCAT         | TGGCG--GG      | CTCACCAA      | AGTAAT | ATTGTAGCCTG | CTTTCAG     |            |           |
| SARS-CoV-2 NC_045512.2 (21629) | CAATTAC    | CCC---    | CTGCAT   | ACACT    | AATCTTT     | CACACG    | T-----   | GGTGT    | TATTACC    | CTGAC         | AAAGTTTTC      | AG-AT         | CCT--- | CAGTTTT     |             |            |           |
|                                |            |           |          |          |             |           |          |          |            |               | Section 278    |               |        |             |             |            |           |
| (26870)                        | 26870      | 26880     | 26890    | 26900    | 26910       | 26920     | 26930    | 26940    | 26950      | 26966         |                |               |        |             |             |            |           |
| Ad 12 X73487 (25156)           | CAC        | TGCGGGGG  | GAATAT   | CTCA     | TTTSCAAG    | GCGGT     | ATTTGCT  | TATACCAT | GATGGAG    | TGGCGAT       | TTCCAA         | -GGAATG       | TCC    | TCCAT       | TACTACCGTCA | TCTC       |           |
| SARS-CoV-2 NC_045512.2 (21706) | ACATTC     | -----     | ACTCA    | --G      | ACTTCTTC    | -----     | TA-----  | -----    | CCTTT      | CTTTCCAA      | TGTTACT        | TGGT          | CCATG  | CTATACATG   | TCTC        |            |           |
|                                |            |           |          |          |             |           |          |          |            |               | Section 279    |               |        |             |             |            |           |
| (26967)                        | 26967      | 26980     | 26990    | 27000    | 27010       | 27020     | 27030    | 27040    | 27050      | 27063         |                |               |        |             |             |            |           |
| Ad 12 X73487 (25252)           | TACAG      | CCCC      | TT-T     | GAAG     | AGCTC       | GACAAGG   | AACCG    | GACCTGC  | ACAAG      | CG-----       | GC--           | CCACT         | AGAAT  | CGGC        | AACA        | GCAGCAACAA |           |
| SARS-CoV-2 NC_045512.2 (21775) | TGGGA      | CCAA      | TGGT     | ACTA     | AGAG        | -GTTTGAT  | AACCG    | CTGTCT   | ACCA       | TTTAATG       | ATGGT          | GTTTATTTT     | GC     | TTCCACT     | GAGAG       | AGTCTAACA  | TAAATAAAG |
|                                |            |           |          |          |             |           |          |          |            |               | Section 280    |               |        |             |             |            |           |
| (27064)                        | 27064      | 27070     | 27080    | 27090    | 27100       | 27110     | 27120    | 27130    | 27140      | 27150         | 27160          |               |        |             |             |            |           |
| Ad 12 X73487 (25333)           | GGAAAG     | TCC       | TGAG     | ----G    | CGCGCG      | AGTTAA    | GAAAG    | GCATT    | TTTCCC     | ACTTTAT       | ATGCTAT        | TTTT          | C-AGC  | AGAGTC      | GAGGTCAA    | GAAACA     | -CGAACTG  |
| SARS-CoV-2 NC_045512.2 (21870) | GCTGGA     | TTTT      | TGTG     | TACTA    | CTT--T      | AGATT     | TCGAA    | GACCA    | GT---CCC   | TACTTAT       | TGTTAAT        | AACGCT        | ACTAAT | GTTGTTAT    | TAAAGT      | CTGTGAATTT |           |



## SARS-CoV-2 &amp; Ad12.apr

|                        |         |             |        |       |       |       |       |       |       |       |            |       |      |      |      |       |     |      |       |     |       |       |      |          |        |      |      |       |      |       |      |     |       |      |     |     |      |     |      |     |     |       |      |      |     |     |     |   |   |   |   |   |    |   |   |
|------------------------|---------|-------------|--------|-------|-------|-------|-------|-------|-------|-------|------------|-------|------|------|------|-------|-----|------|-------|-----|-------|-------|------|----------|--------|------|------|-------|------|-------|------|-----|-------|------|-----|-----|------|-----|------|-----|-----|-------|------|------|-----|-----|-----|---|---|---|---|---|----|---|---|
|                        |         | Section 281 |        |       |       |       |       |       |       |       |            |       |      |      |      |       |     |      |       |     |       |       |      |          |        |      |      |       |      |       |      |     |       |      |     |     |      |     |      |     |     |       |      |      |     |     |     |   |   |   |   |   |    |   |   |
|                        | (27161) | 27161       | 27170  | 27180 | 27190 | 27200 | 27210 | 27220 | 27230 | 27240 | 27257      |       |      |      |      |       |     |      |       |     |       |       |      |          |        |      |      |       |      |       |      |     |       |      |     |     |      |     |      |     |     |       |      |      |     |     |     |   |   |   |   |   |    |   |   |
| Ad 12 X73487           | (25424) | AAAT        | TAAAAA | ACC   | GT    | TCC   | CT    | GC    | TT    | CACT  | TACCCGCAGC | TGT   | CT   | CT   | AC   | CT    | CA  | AAA  | GCG   | AAG | ATC   | AGTTG | CA   | ACGCACCT | TGCAG  | G    | GACG | CAGA  | AGCT | C     |      |     |       |      |     |     |      |     |      |     |     |       |      |      |     |     |     |   |   |   |   |   |    |   |   |
| SARS-CoV-2 NC_045512.2 | (21962) | CAAT        | TTT    | -GT   | AAT   | GA    | TCC   | AT    | ----- | TTTTG | G--G       | TGT   | TT   | AT   | TAC  | CAC   | AAA | AAC  | AA    | CAA | AGTTG | GA    | ---- | TG       | GAAAGT | G    | AGTT | CAGA  | GTT  | TA    |      |     |       |      |     |     |      |     |      |     |     |       |      |      |     |     |     |   |   |   |   |   |    |   |   |
|                        |         | Section 282 |        |       |       |       |       |       |       |       |            |       |      |      |      |       |     |      |       |     |       |       |      |          |        |      |      |       |      |       |      |     |       |      |     |     |      |     |      |     |     |       |      |      |     |     |     |   |   |   |   |   |    |   |   |
|                        | (27258) | 27258       | 27270  | 27280 | 27290 | 27300 | 27310 | 27320 | 27330 | 27340 | 27354      |       |      |      |      |       |     |      |       |     |       |       |      |          |        |      |      |       |      |       |      |     |       |      |     |     |      |     |      |     |     |       |      |      |     |     |     |   |   |   |   |   |    |   |   |
| Ad 12 X73487           | (25521) | TG          | TT     | CA    | AA    | TAA   | AT    | ACT   | GC    | TCC   | CT         | CT    | CG   | CT   | TAA  | AGA   | GT  | AAA  | ----- | AAA | AG    | CC    | CG   | CG       | C      | GCG  | ACT  | T--TC | A    | ----- | AC   | AGG | CGG   | G    | AAA |     |      |     |      |     |     |       |      |      |     |     |     |   |   |   |   |   |    |   |   |
| SARS-CoV-2 NC_045512.2 | (22042) | T           | -T     | CT    | AG    | T     | G     | CGA   | A     | TA    | AT         | T     | -G   | CA   | CT   | TT    | -T  | GA   | A     | TAT | GT    | CT    | CT   | CAG      | CT     | TTTT | CTT  | AT    | GGA  | CC    | TT   | GAA | G     | GAA  | AC  | AGG | GT   | A   | ATTT | CAA | AA  | A     | TCT  | TA   | GGG | AA  |     |   |   |   |   |   |    |   |   |
|                        |         | Section 283 |        |       |       |       |       |       |       |       |            |       |      |      |      |       |     |      |       |     |       |       |      |          |        |      |      |       |      |       |      |     |       |      |     |     |      |     |      |     |     |       |      |      |     |     |     |   |   |   |   |   |    |   |   |
|                        | (27355) | 27355       | 27360  | 27370 | 27380 | 27390 | 27400 | 27410 | 27420 | 27430 | 27440      | 27451 |      |      |      |       |     |      |       |     |       |       |      |          |        |      |      |       |      |       |      |     |       |      |     |     |      |     |      |     |     |       |      |      |     |     |     |   |   |   |   |   |    |   |   |
| Ad 12 X73487           | (25596) | G---        | TG     | AC    | GT    | CA    | -CA   | ACAA  | GAT   | G     | TA         | ----  | AA   | GAT  | AT   | TCC   | CAC | --GC | CT    | TA  | CA    | TG    | TGG  | AG       | CT     | TT   | CA   | ACC   | C    | CAA   | AT   | GGG | A     | CT   | GGC | GG  | CCG  | GCG | CGGC |     |     |       |      |      |     |     |     |   |   |   |   |   |    |   |   |
| SARS-CoV-2 NC_045512.2 | (22136) | TTT         | G      | TT    | -T    | A     | GA    | A     | TATT  | GAT   | G          | T     | TA   | TTTT | AA   | AAT   | AT  | T    | C     | TA  | AG    | CA    | C    | AC       | G      | CT   | AT   | TAA   | --TT | -T    | AG   | TG  | C     | GT   | G   | AT  | C    | -TC | CCT  | CA  | GG  | GTTTT | CGGC |      |     |     |     |   |   |   |   |   |    |   |   |
|                        |         | Section 284 |        |       |       |       |       |       |       |       |            |       |      |      |      |       |     |      |       |     |       |       |      |          |        |      |      |       |      |       |      |     |       |      |     |     |      |     |      |     |     |       |      |      |     |     |     |   |   |   |   |   |    |   |   |
|                        | (27452) | 27452       | 27460  | 27470 | 27480 | 27490 | 27500 | 27510 | 27520 | 27530 | 27548      |       |      |      |      |       |     |      |       |     |       |       |      |          |        |      |      |       |      |       |      |     |       |      |     |     |      |     |      |     |     |       |      |      |     |     |     |   |   |   |   |   |    |   |   |
| Ad 12 X73487           | (25683) | T           | CA     | AG    | A     | C--   | TAT   | TTC   | TAG   | CAA   | --AAT      | GAA   | ATT  | GG   | TTAA | GCG   | CGG | ACCC | CA    | TGA | TTT   | C     | AG   | GG       | TGA    | AT   | GGG  | GT    | AC   | GAG   | CCCC | GG  | C     | GTA  | AC  | CAA | AT   | ACT |      |     |     |       |      |      |     |     |     |   |   |   |   |   |    |   |   |
| SARS-CoV-2 NC_045512.2 | (22228) | TTT         | AGA    | AC    | CA    | T     | TGG   | TAG   | ATTT  | GCC   | AAT        | AGGA  | TTAA | CAT  | C    | ACT   | AGG | TTT  | CA    | AAC | TTT   | ACT   | T    | T        | G      | CTT  | T    | T     | A    | CATA  | GA   | AG  | T     | ATTT | T   | GAC | T    | CT  | CT   | G   | GTG | ATT   | CT   |      |     |     |     |   |   |   |   |   |    |   |   |
|                        |         | Section 285 |        |       |       |       |       |       |       |       |            |       |      |      |      |       |     |      |       |     |       |       |      |          |        |      |      |       |      |       |      |     |       |      |     |     |      |     |      |     |     |       |      |      |     |     |     |   |   |   |   |   |    |   |   |
|                        | (27549) | 27549       | 27560  | 27570 | 27580 | 27590 | 27600 | 27610 | 27620 | 27630 | 27645      |       |      |      |      |       |     |      |       |     |       |       |      |          |        |      |      |       |      |       |      |     |       |      |     |     |      |     |      |     |     |       |      |      |     |     |     |   |   |   |   |   |    |   |   |
| Ad 12 X73487           | (25776) | G           | CT     | AG    | A     | CAA   | G     | CCG   | CT    | CT    | CACC       | GCT   | ACA  | C    | ACG  | T     | AAT | CA   | ACT   | T   | ACC   | CT    | CCT  | CT       | TGG    | C    | AG   | CT    | T    | GCCC  | T    | GAT | AT    | AT   | CAG | G   | AAAA | AT  | CCCC | T   | CCT | ACC   |      |      |     |     |     |   |   |   |   |   |    |   |   |
| SARS-CoV-2 NC_045512.2 | (22325) | T           | CT     | TC    | A     | GGTT  | G     | GAC   | AG    | CT    | GG         | -T    | GCT  | G    | CA   | G     | CTT | AT   | TAT   | GT  | GGG   | T     | AT   | CT       | T      | C    | AA   | CT    | AGG  | A     | CTTT | T   | CT    | AT   | T   | AA  | AT   | AT  | ---  | A   | --- | AT    | G    | AAAA | T   | GGA | ACC |   |   |   |   |   |    |   |   |
|                        |         | Section 286 |        |       |       |       |       |       |       |       |            |       |      |      |      |       |     |      |       |     |       |       |      |          |        |      |      |       |      |       |      |     |       |      |     |     |      |     |      |     |     |       |      |      |     |     |     |   |   |   |   |   |    |   |   |
|                        | (27646) | 27646       | 27660  | 27670 | 27680 | 27690 | 27700 | 27710 | 27720 | 27730 | 27742      |       |      |      |      |       |     |      |       |     |       |       |      |          |        |      |      |       |      |       |      |     |       |      |     |     |      |     |      |     |     |       |      |      |     |     |     |   |   |   |   |   |    |   |   |
| Ad 12 X73487           | (25873) | A           | CT     | GT    | A     | CT    | T     | TTG   | CC    | T     | CG         | C     | GAC  | G    | CC   | G     | AG  | CC   | G     | AAG | T     | CC    | A    | T        | A      | TG   | AC   | TAA   | G    | CT    | --   | G   | GGG   | CA   | C   | AG  | CT   | T   | G    | CG  | GG  | CGG   | ---- | TG   | CAC | GT  | C   | A | G | T | T | C | AG | G | T |
| SARS-CoV-2 NC_045512.2 | (22415) | A           | T      | TAC   | AGA   | T     | G     | CT    | -G    | T     | -AG        | ACT   | G    | TG   | C    | ----- | ACT | TG   | AC    | CCT | CT    | CT    | CAG  | AAA      | CA     | A    | AG   | TG    | T    | AC    | G    | TT  | GAA   | AT   | CC  | T   | T    | CAC | T    | G   | T   | AG    | AAA  | ---  | A   | AG  |     |   |   |   |   |   |    |   |   |
|                        |         | Section 287 |        |       |       |       |       |       |       |       |            |       |      |      |      |       |     |      |       |     |       |       |      |          |        |      |      |       |      |       |      |     |       |      |     |     |      |     |      |     |     |       |      |      |     |     |     |   |   |   |   |   |    |   |   |
|                        | (27743) | 27743       | 27750  | 27760 | 27770 | 27780 | 27790 | 27800 | 27810 | 27820 | 27839      |       |      |      |      |       |     |      |       |     |       |       |      |          |        |      |      |       |      |       |      |     |       |      |     |     |      |     |      |     |     |       |      |      |     |     |     |   |   |   |   |   |    |   |   |
| Ad 12 X73487           | (25964) | A           | TAA    | AGG   | T     | CG    | CA    | CT    | GAG   | CC    | CT         | AT    | CCG  | T    | CT   | CAG   | CT  | A    | TAA   | AA  | AG    | AGT   | AC   | T        | CA     | T    | CAG  | -     | AGG  | AA    | G    | TA  | T     | T    | CAG | CT  | GA   | AC  | GA   | C   | GA  | -G    | T    | ACA  | T   | CG  | CCA |   |   |   |   |   |    |   |   |
| SARS-CoV-2 NC_045512.2 | (22495) | A           | ---    | AT    | C     | TAT   | CA    | A     | ACT   | ----- | T          | ----- | CT   | A    | ACT  | T     | TAG | AG   | -T    | CCA | AC    | CAA   | -    | CAG      | AA     | T    | CT   | AT    | T    | G     | T    | TA  | ----- | GA   | T   | T   | C    | T   | AA   | T   | AT  | ACA   | A    | ACT  | -T  |     |     |   |   |   |   |   |    |   |   |

SARS-CoV-2 & Ad12.apr

[illegible]

SARS-CoV-2 & Ad12.apr

|                        |         |             |       |       |        |       |       |        |         |       |         |       |        |     |        |        |         |           |        |       |        |       |       |       |        |        |       |          |         |        |       |       |      |       |      |      |      |       |       |        |     |      |      |     |        |       |    |     |     |        |    |       |
|------------------------|---------|-------------|-------|-------|--------|-------|-------|--------|---------|-------|---------|-------|--------|-----|--------|--------|---------|-----------|--------|-------|--------|-------|-------|-------|--------|--------|-------|----------|---------|--------|-------|-------|------|-------|------|------|------|-------|-------|--------|-----|------|------|-----|--------|-------|----|-----|-----|--------|----|-------|
|                        |         | Section 295 |       |       |        |       |       |        |         |       |         |       |        |     |        |        |         |           |        |       |        |       |       |       |        |        |       |          |         |        |       |       |      |       |      |      |      |       |       |        |     |      |      |     |        |       |    |     |     |        |    |       |
|                        | (28519) | 28519       | 28530 | 28540 | 28550  | 28560 | 28570 | 28580  | 28590   | 28600 | 28615   |       |        |     |        |        |         |           |        |       |        |       |       |       |        |        |       |          |         |        |       |       |      |       |      |      |      |       |       |        |     |      |      |     |        |       |    |     |     |        |    |       |
| Ad 12 X73487           | (26702) | TCCC        | TCA   | TAT   | TCACT  | CTTC  | GC    | TG     | CAG     | TTT   | TTTTTC  | CACA  | CAT    | CT  | CACCT  | GGACC  | TT      | TAAC      | GG     | AAA   | ACACG  | T     | TAC   | CAAT  | TAC    | CAGAT  | AT    | AA       | AGT     | TTTAA  | ACT   |       |      |       |      |      |      |       |       |        |     |      |      |     |        |       |    |     |     |        |    |       |
| SARS-CoV-2 NC_045512.2 | (23178) | ----        | TCA   | AT    | TTCAA  | CTTC  | AA    | TG     | G--     | TTT   | AACAGG  | CACA  | GG     | TGT | TCTT   | ACTGAG | T       | TAAC      | AA     | AAA   | GTT--  | T     | CTG   | CCT   | TTC    | --     | CA    | AA       | ATT     | TG-GC  | AGA   |       |      |       |      |      |      |       |       |        |     |      |      |     |        |       |    |     |     |        |    |       |
|                        |         | Section 296 |       |       |        |       |       |        |         |       |         |       |        |     |        |        |         |           |        |       |        |       |       |       |        |        |       |          |         |        |       |       |      |       |      |      |      |       |       |        |     |      |      |     |        |       |    |     |     |        |    |       |
|                        | (28616) | 28616       | 28630 | 28640 | 28650  | 28660 | 28670 | 28680  | 28690   | 28700 | 28712   |       |        |     |        |        |         |           |        |       |        |       |       |       |        |        |       |          |         |        |       |       |      |       |      |      |      |       |       |        |     |      |      |     |        |       |    |     |     |        |    |       |
| Ad 12 X73487           | (26799) | ACA         | CAAA  | GAAA  | ACA    | TC    | ACT   | CT     | ATT     | T     | -CAACCT | AT    | TA     | AC  | CT     | GGGA   | TA      | -----     | C      | TAC   | CGC    | TG    | CTC   | AG    | CTCCAC | CCT    | GT    | TACGCA   | AG      | CATT   | TTTT  | GT    | TG   |       |      |      |      |       |       |        |     |      |      |     |        |       |    |     |     |        |    |       |
| SARS-CoV-2 NC_045512.2 | (23264) | GA-         | CATT  | G     | CTG    | ACA   | CT    | ACT    | GATGC   | T     | GTCCGTG | AT    | CC     | AC  | AGACAC | T      | TGAGATT | CT        | T      | GA    | C      | ATT   | TAC   | --    | AC     | CATGTT | C     | TTT      | TGGTGGT | G      | TCAG  | T     | TTT  | TAA   |      |      |      |       |       |        |     |      |      |     |        |       |    |     |     |        |    |       |
|                        |         | Section 297 |       |       |        |       |       |        |         |       |         |       |        |     |        |        |         |           |        |       |        |       |       |       |        |        |       |          |         |        |       |       |      |       |      |      |      |       |       |        |     |      |      |     |        |       |    |     |     |        |    |       |
|                        | (28713) | 28713       | 28720 | 28730 | 28740  | 28750 | 28760 | 28770  | 28780   | 28790 | 28809   |       |        |     |        |        |         |           |        |       |        |       |       |       |        |        |       |          |         |        |       |       |      |       |      |      |      |       |       |        |     |      |      |     |        |       |    |     |     |        |    |       |
| Ad 12 X73487           | (26888) | CT          | CCAG  | TT    | ATTGAC | AA    | ACGCC | CT     | GCTC    | G     | ACA     | CA    | G      | CT  | GTCTGT | CAC    | T       | GAGCAC    | ATC    | ACC   | GAG    | G     | CAGTT | TCTC  | CTTCT  | AA     | AGT   | AC       | CAGAGG  | AAATTG | T     |       |      |       |      |      |      |       |       |        |     |      |      |     |        |       |    |     |     |        |    |       |
| SARS-CoV-2 NC_045512.2 | (23358) | C           | ACCAG | GA    | AC---  | AA    | TACTT | CT     | A--     | AC--  | CAG--   | GT    | TGCTGT | TC- | TTT--- | ATC    | -AG     | GAT       | G      | TTAAC | T      | GCA   | C---- | AG    | AGT    | C      | C     | CTGTT--- | GC      | T      |       |       |      |       |      |      |      |       |       |        |     |      |      |     |        |       |    |     |     |        |    |       |
|                        |         | Section 298 |       |       |        |       |       |        |         |       |         |       |        |     |        |        |         |           |        |       |        |       |       |       |        |        |       |          |         |        |       |       |      |       |      |      |      |       |       |        |     |      |      |     |        |       |    |     |     |        |    |       |
|                        | (28810) | 28810       | 28820 | 28830 | 28840  | 28850 | 28860 | 28870  | 28880   | 28890 | 28906   |       |        |     |        |        |         |           |        |       |        |       |       |       |        |        |       |          |         |        |       |       |      |       |      |      |      |       |       |        |     |      |      |     |        |       |    |     |     |        |    |       |
| Ad 12 X73487           | (26985) | G           | T     | A     | CT     | TTT   | CA    | AA     | C       | TTT   | TAC     | A     | -AA    | C   | ACTT   | AG     | -       | TTT       | TAA    | ATT   | GT     | ----- | T     | C     | T      | G      | T     | C        | T       | AAC    | TC    | CTTA  | ATT  | T     | CAT  | GG   | T    | TGC   | TAA   | CAGCTC | T   | CT-- | GTGC |     |        |       |    |     |     |        |    |       |
| SARS-CoV-2 NC_045512.2 | (23432) | A           | TT    | CAT   | TGCAG  | A     | T     | CAACTT | A       | CTC   | T       | ACTT  | G      | CG  | T      | G      | T       | TTT       | ATT    | CT    | TACAGG | T     | CT    | AA    | T      | GT     | TTTT  | TC       | AAAC    | AC     | G     | TGCAG | GG   | CT    | G    | TT   | TAA  | ----- | TAGGG | G      | CTG |      |      |     |        |       |    |     |     |        |    |       |
|                        |         | Section 299 |       |       |        |       |       |        |         |       |         |       |        |     |        |        |         |           |        |       |        |       |       |       |        |        |       |          |         |        |       |       |      |       |      |      |      |       |       |        |     |      |      |     |        |       |    |     |     |        |    |       |
|                        | (28907) | 28907       | 28920 | 28930 | 28940  | 28950 | 28960 | 28970  | 28980   | 28990 | 29003   |       |        |     |        |        |         |           |        |       |        |       |       |       |        |        |       |          |         |        |       |       |      |       |      |      |      |       |       |        |     |      |      |     |        |       |    |     |     |        |    |       |
| Ad 12 X73487           | (27073) | AAA         | ACT   | TT    | T      | C     | T     | AC     | CAAGGAA | AACT  | TTT     | T     | G      | T   | ATTC   | TG     | CT      | AA        | CT     | CA    | CATTG  | TG    | TAA   | C     | CAG    | AGC    | ACC   | CCT      | T       | CCC    | ACC   | TTA   | CTCT | AT    | TGCC | AC   | CTT  | TT    | -GTT  |        |     |      |      |     |        |       |    |     |     |        |    |       |
| SARS-CoV-2 NC_045512.2 | (23523) | AA          | CA-   | T     | G      | T     | CA    | AC     | -----   | AACT  | CA      | TAT   | TGA-G  | TG  | TG     | AC     | ATA     | C         | CCATTG | GTG-- | CAG    | G     | TAT   | ATG   | C      | G      | T---  | A        | -G      | TTA    | TCAG  | ACT   | CAG  | AC    | TAAT | TT   | CTCC |       |       |        |     |      |      |     |        |       |    |     |     |        |    |       |
|                        |         | Section 300 |       |       |        |       |       |        |         |       |         |       |        |     |        |        |         |           |        |       |        |       |       |       |        |        |       |          |         |        |       |       |      |       |      |      |      |       |       |        |     |      |      |     |        |       |    |     |     |        |    |       |
|                        | (29004) | 29004       | 29010 | 29020 | 29030  | 29040 | 29050 | 29060  | 29070   | 29080 | 29090   | 29100 |        |     |        |        |         |           |        |       |        |       |       |       |        |        |       |          |         |        |       |       |      |       |      |      |      |       |       |        |     |      |      |     |        |       |    |     |     |        |    |       |
| Ad 12 X73487           | (27169) | G           | C     | ----  | G      | T     | C     | ----   | G       | T     | A       | CT    | TTT    | T   | G      | C      | AT      | AGGAGCTGC | A      | CGTA  | CTA    | GC    | CC    | TGTCA | ACA    | G      | CATTG | GA       | ATTT    | AACT   | T     | ACTG  | ---- | T     | C    | C    | C    | A     | AGT   |        |     |      |      |     |        |       |    |     |     |        |    |       |
| SARS-CoV-2 NC_045512.2 | (23605) | T           | C     | GGCGG | G      | CA    | G     | TAGT   | G       | T     | AG      | CT    | AG     | T   | CA     | AT     | CCATC   | ----      | A      | TTGC  | CTA    | CA    | G     | TA    | TGTCA  | CTT    | G     | TGCAG    | G       | ----   | AAAA  | T     | CAG  | TTGCT | T    | A    | C    | T     | A     | A      | AC  |      |      |     |        |       |    |     |     |        |    |       |
|                        |         | Section 301 |       |       |        |       |       |        |         |       |         |       |        |     |        |        |         |           |        |       |        |       |       |       |        |        |       |          |         |        |       |       |      |       |      |      |      |       |       |        |     |      |      |     |        |       |    |     |     |        |    |       |
|                        | (29101) | 29101       | 29110 | 29120 | 29130  | 29140 | 29150 | 29160  | 29170   | 29180 | 29197   |       |        |     |        |        |         |           |        |       |        |       |       |       |        |        |       |          |         |        |       |       |      |       |      |      |      |       |       |        |     |      |      |     |        |       |    |     |     |        |    |       |
| Ad 12 X73487           | (27252) | G           | T     | C     | G      | C     | C     | T      | T       | T     | G       | T     | G--    | AT  | CAA    | TAC    | T       | G         | A      | T     | ATT    | TA-   | G     | ACTAT | A      | ATCCCT | T     | G        | CT      | TG     | C     | TTAC  | GG   | CG    | T    | CT   | CG   | AG    | CTC   | T      | T   | ATT  | T    | TTT | ATT    | C---- | C  | T   | G   | ATTT   |    |       |
| SARS-CoV-2 NC_045512.2 | (23693) | T           | C     | T     | A      | T     | T     | G      | C       | C     | A       | T     | A      | C   | C      | AA     | ATT     | T         | T      | A     | C      | T     | A     | T     | T      | AGT    | G     | T        | T       | ACCA   | CAGAA | AT    | T    | CT    | -AC  | CAGT | G    | T     | C     | T      | A   | T    | G    | CA  | AGACAT | C     | AG | TAG | ATT | GTACAA | TG | TACAT |

SARS-CoV-2 & Ad12.apr

|                                |                                        |                  |                      |                |                  |                |               |               |            |                 |             |
|--------------------------------|----------------------------------------|------------------|----------------------|----------------|------------------|----------------|---------------|---------------|------------|-----------------|-------------|
|                                |                                        |                  |                      |                |                  |                |               |               |            |                 | Section 302 |
| (29198)                        | 29198                                  | 29210            | 29220                | 29230          | 29240            | 29250          | 29260         | 29270         | 29280      | 29294           |             |
| Ad 12 X73487 (27342)           | TAACTTGTT-TCTAGTGCAACATTTGTATTCAT-AC   | TAA              | CAATGCTTTC           | CATTTTT        | C----            | TTTTATT        | TCTCTTT       | CTTTACCTT     | CTGGCT     | TGTATG          |             |
| SARS-CoV-2 NC_045512.2 (23788) | TGTGGTGATTCAACT--GAATGCAGCAATCTTTTGTTG | CAAT--ATGG       | CAGTTTT              | TGTAC-ACA      | ATTAAA           | CCGTGCTTTA     | ---A          | CTGGAA        | TAGCTG     |                 |             |
|                                |                                        |                  |                      |                |                  |                |               |               |            |                 | Section 303 |
| (29295)                        | 29295                                  | 29300            | 29310                | 29320          | 29330            | 29340          | 29350         | 29360         | 29370      | 29391           |             |
| Ad 12 X73487 (27433)           | CTCAAACAGCCGAAAACACACTAAAGTCGTGTGG     | AAGCTGG-C        | ATAATGTAA            | CCCT--T        | CC               | CCACCTTTC      | TGGTTCAC-ACCA | AACTGGC       | CAT        |                 |             |
| SARS-CoV-2 NC_045512.2 (23877) | TGTAAACAAGACAAAAACA                    | CCAAGAGT         | TTTGTGCAC            | AAGTCAAA-      | CAAA             | TTTACAAAACACCA | CCAATTAAAGA   | TTT           | TGGTGGTTTT | CAATTTTT        |             |
|                                |                                        |                  |                      |                |                  |                |               |               |            |                 | Section 304 |
| (29392)                        | 29392                                  | 29400            | 29410                | 29420          | 29430            | 29440          | 29450         | 29460         | 29470      | 29488           |             |
| Ad 12 X73487 (27525)           | GTTACTTGGCTAGTAGAGACATCAGATTATGGTT     | CAGCTTC          | TC                   | CAGACA         | ACTT             | CATT           | TTCAGT        | G----         | GACAAA     | ACTATG          |             |
| SARS-CoV-2 NC_045512.2 (23973) | AAATA                                  | TTAC             | C----                | AGATC          | CATCA--AA        | CCAAG          | CAGAGG        | TCAT-----     | TATT       | GAAGATCTACTTTTC |             |
|                                |                                        |                  |                      |                |                  |                |               |               |            |                 | Section 305 |
| (29489)                        | 29489                                  | 29500            | 29510                | 29520          | 29530            | 29540          | 29550         | 29560         | 29570      | 29585           |             |
| Ad 12 X73487 (27618)           | ACC                                    | ATGGTGTGGCCTTATT | ACAATTTACATTTTAACTGT | TGAA--A        | ATTA-TG          | ACCTTAATCT     | ---G          | TTT           | TGGCTTA    | -----           |             |
| SARS-CoV-2 NC_045512.2 (24050) | G--                                    | ATGC             | TGGCTTCATCAAA        | ACAATATGGTG-AT | TGCTGTGTGATATTGC | TGCTAGAG       | ACTCAT-TT     | TGTGCACAA     | AAGTTT     | AACG            |             |
|                                |                                        |                  |                      |                |                  |                |               |               |            |                 | Section 306 |
| (29586)                        | 29586                                  | 29600            | 29610                | 29620          | 29630            | 29640          | 29650         | 29660         | 29670      | 29682           |             |
| Ad 12 X73487 (27703)           | CTA                                    | TTTACAA          | CGTTAAAAA-T          | CA             | GTC              | AATGCTT-CT     | GAAACA        | NATATTTACT    | ATGA       | TTTA            |             |
| SARS-CoV-2 NC_045512.2 (24139) | TGT                                    | TTTGC            | CACTTTGCTCAC         | AGATGA         | AATGATTGCT       | CAATAC         | ACT-T         | CTGC          | ACTGTT--   | AGC-GG          |             |
|                                |                                        |                  |                      |                |                  |                |               |               |            |                 | Section 307 |
| (29683)                        | 29683                                  | 29690            | 29700                | 29710          | 29720            | 29730          | 29740         | 29750         | 29760      | 29779           |             |
| Ad 12 X73487 (27798)           | ACTTCAAAGTACCTTA--CAAACGATTAT-TGT-CA   | CATTA            | CAATTA               | ACTTGC         | ACTAACTC         | TGATTACC       | CAAT          | AAGGTTGTG---- | TTTA-----  | A               |             |
| SARS-CoV-2 NC_045512.2 (24231) | CAG--GTGC                              | TGCA             | TTACAAAT             | ACATTGCTAT     | GC               | CAATGGCTTA     | TAGGTTT       | ATGGTAT       | TGGAGTTA   | CAC             |             |
|                                |                                        |                  |                      |                |                  |                |               |               |            |                 | Section 308 |
| (29780)                        | 29780                                  | 29790            | 29800                | 29810          | 29820            | 29830          | 29840         | 29850         | 29860      | 29876           |             |
| Ad 12 X73487 (27881)           | T--                                    | AATGT            | CAGT                 | CGATGGT        | ACTAC            | GATAC          | GGTA-A        | GGG           | CA         | GCC----         |             |
| SARS-CoV-2 NC_045512.2 (24326) | TG                                     | AT               | TGC                  | CAAC           | CAATTTA          | ATAGT          | GCTATT        | GG            | CAAA       | ATTCA           |             |

SARS-CoV-2 & Ad12.apr

|                                |       |                 |            |        |           |       |          |       |         |        |          |       |       |          |           |        |             |        |        |       |         |      |         |         |        |         |          |        |        |      |      |         |
|--------------------------------|-------|-----------------|------------|--------|-----------|-------|----------|-------|---------|--------|----------|-------|-------|----------|-----------|--------|-------------|--------|--------|-------|---------|------|---------|---------|--------|---------|----------|--------|--------|------|------|---------|
|                                |       |                 |            |        |           |       |          |       |         |        |          |       |       |          |           |        | Section 309 |        |        |       |         |      |         |         |        |         |          |        |        |      |      |         |
| (29877)                        | 29877 | 29890           | 29900      | 29910  | 29920     | 29930 | 29940    | 29950 | 29960   | 29973  |          |       |       |          |           |        |             |        |        |       |         |      |         |         |        |         |          |        |        |      |      |         |
| Ad 12 X73487 (27967)           | TTA   | CTAAAAG         | -----      | CTTTAA | TCA       | CACTT | ACCCTTTT | AA    | TGAGCTC | TGTGA  | TTATCC   | CACAT | CCCA  | ATCTCAAC | ACAGTT    | TAA    | CACA        | TACA   | G-TAA  |       |         |      |         |         |        |         |          |        |        |      |      |         |
| SARS-CoV-2 NC_045512.2 (24419) | AAC   | CAAAAT          | GCACAAG    | CTTTAA | CAC       | GCTT  | GTTAAACA | ACT   | TAGCTC  | CAATT  | TTGGTG   | CAAT  | TTCA  | AGTGT    | TTTAA     | TGAT   | CCTT        | TCAC   | GCTCTT |       |         |      |         |         |        |         |          |        |        |      |      |         |
|                                |       |                 |            |        |           |       |          |       |         |        |          |       |       |          |           |        | Section 310 |        |        |       |         |      |         |         |        |         |          |        |        |      |      |         |
| (29974)                        | 29974 | 29980           | 29990      | 30000  | 30010     | 30020 | 30030    | 30040 | 30050   | 30060  | 30070    |       |       |          |           |        |             |        |        |       |         |      |         |         |        |         |          |        |        |      |      |         |
| Ad 12 X73487 (28057)           | G     | CAC             | AGTAATC    | TTTT   | TTAG      | GAAT  | AA       | TG    | GCT     | --     | TCAG     | CAT   | TTTGA | -        | TTATTA    | TAGC   | AG          | CC     | TTT    | --    | ATT     | TATC | TG      | TGCTGG  | CA     | TAGAAAA | TCT      | TT     | GTGT   |      |      |         |
| SARS-CoV-2 NC_045512.2 (24515) | G     | ACA             | AAGTTGAGGC | TGA    | AG        | TGC   | AAAT     | TG    | AT      | TAGGTT | G        | -     | AT    | CACAGG   | CAGACT    | TCAA   | AG          | TT     | TGCAG  | ACA   | TAT     | G    | TG      | ACTCAA  | CAA    | ----    | TAA      | TT     | AGAG   |      |      |         |
|                                |       |                 |            |        |           |       |          |       |         |        |          |       |       |          |           |        | Section 311 |        |        |       |         |      |         |         |        |         |          |        |        |      |      |         |
| (30071)                        | 30071 | 30080           | 30090      | 30100  | 30110     | 30120 | 30130    | 30140 | 30150   | 30167  |          |       |       |          |           |        |             |        |        |       |         |      |         |         |        |         |          |        |        |      |      |         |
| Ad 12 X73487 (28149)           | G     | TTTCT           | AAAA       | CAGAA  | CC        | TCT   | --       | TATG  | CCGAT   | TCCT   | TACTAG   | TT    | TC    | TTTT     | TTCT      | TAC    | AGTATGGT    | -----  | GACGGT | TCTTC | TC      | ATC  | TTTT    | TATGC   |        |         |          |        |        |      |      |         |
| SARS-CoV-2 NC_045512.2 (24606) | C     | TGCAG           | AAAT       | CAGA   | GCT       | TCT   | GC       | TAAT  | CTTGCT  | TGCT   | ACTAA    | AAAT  | TC    | AGAG     | TGTG      | TAC    | TTGGACA     | ATCA   | AAAA   | GAG   | -----   | TGAT | TT      | TTTGT   | GGAA   |         |          |        |        |      |      |         |
|                                |       |                 |            |        |           |       |          |       |         |        |          |       |       |          |           |        | Section 312 |        |        |       |         |      |         |         |        |         |          |        |        |      |      |         |
| (30168)                        | 30168 | 30180           | 30190      | 30200  | 30210     | 30220 | 30230    | 30240 | 30250   | 30264  |          |       |       |          |           |        |             |        |        |       |         |      |         |         |        |         |          |        |        |      |      |         |
| Ad 12 X73487 (28237)           | CT    | G               | CAG        | TCAT   | TT        | ---   | TTTC     | -     | TTCT    | TC     | G        | ----- | ACT   | TTTGCC   | G         | CAGT   | CAGTGA      | CTTG   | AT     | CCC   | GAG     | TGT  | TTAG    | CC      | CC     | CTT     | TGCGGTGT | AC     | CT     | GATT |      |         |
| SARS-CoV-2 NC_045512.2 (24696) | AG    | GG              | CTA        | TCAT   | CT        | TTATG | TC       | CT    | TC      | CT     | CAGTCAGC | AC    | CT    | CA       | --        | TGGT   | GT          | AGTCTT | CT     | TGC   | AT      | GT   | GAC     | TTAT    | TGTC   | CC      | TG       | CACAAG | AAAAAG | AACT | TCAC |         |
|                                |       |                 |            |        |           |       |          |       |         |        |          |       |       |          |           |        | Section 313 |        |        |       |         |      |         |         |        |         |          |        |        |      |      |         |
| (30265)                        | 30265 | 30270           | 30280      | 30290  | 30300     | 30310 | 30320    | 30330 | 30340   | 30350  | 30361    |       |       |          |           |        |             |        |        |       |         |      |         |         |        |         |          |        |        |      |      |         |
| Ad 12 X73487 (28324)           | TT    | CACAT           | TTG        | TGAC   | TGCT      | TAC   | CTGCGT   | CTGC  | -       | AGTA   | TTA      | TTA   | CTCT  | GCT      | AA        | TCAC   | -           | CTC    | -      | GCT   | CAAT    | TTTT | TG      | ATTAC   | TACTAC | GT      | GAG      | AA     | TTGTTT |      |      |         |
| SARS-CoV-2 NC_045512.2 (24790) | AA    | CT              | -          | GC     | TCC       | TGC   | CATT     | TGT   | CATGA   | TGGAAA | AG       | CACAC | TTT   | CTC      | GT        | GA     | AGGTGT      | CT     | TT     | GTT   | TCAA    | AT   | TGGCACA | A       | ---    | C       | -        | ACTG   | -      | GTTT | GT   | AACACAA |
|                                |       |                 |            |        |           |       |          |       |         |        |          |       |       |          |           |        | Section 314 |        |        |       |         |      |         |         |        |         |          |        |        |      |      |         |
| (30362)                        | 30362 | 30370           | 30380      | 30390  | 30400     | 30410 | 30420    | 30430 | 30440   | 30458  |          |       |       |          |           |        |             |        |        |       |         |      |         |         |        |         |          |        |        |      |      |         |
| Ad 12 X73487 (28418)           | A     | CCGCAGACACCACC  | CC         | CGTT   | AC        | CAAA  | AG       | C     | ----    | CTCA   | AA       | TT    | GC    | GC       | TCT       | TT     | TGCAG       | CT     | CCA    | ACCA  | TG      | AA   | AC      | AG      | CAT    | TAGT    | TCTTTT   | CTTTAT | GT     |      |      |         |
| SARS-CoV-2 NC_045512.2 (24881) | A     | GGGAATTTTTATGAA | CC         | ACAA   | AT        | CA    | TT       | AC    | TACAGA  | CAAC   | ACAT     | TT    | GT    | TG       | TCT       | GG     | TA          | -      | ACT    | GTG   | ATGT    | TGT  | AA      | -       | TAGGA  | ATTGT   | CAACAA   | CAC    | -      | AGT  |      |         |
|                                |       |                 |            |        |           |       |          |       |         |        |          |       |       |          |           |        | Section 315 |        |        |       |         |      |         |         |        |         |          |        |        |      |      |         |
| (30459)                        | 30459 | 30470           | 30480      | 30490  | 30500     | 30510 | 30520    | 30530 | 30540   | 30555  |          |       |       |          |           |        |             |        |        |       |         |      |         |         |        |         |          |        |        |      |      |         |
| Ad 12 X73487 (28510)           | T     | AAT             | CCCAG      | TTTG   | GGCTAG    | TT    | CT       | ---   | TCA     | ACT    | A        | CAT   | A     | AACCAT   | G         | -----  | GAT         | TTTT   | TT     | AGA   | TTGTTAT | AC   | -       | TAAA    | G      | AAA     | -        | CAACTA |        |      |      |         |
| SARS-CoV-2 NC_045512.2 (24973) | T     | TAT             | GATCC      | TTTG   | CAACCTGAA | TT    | AGAC     | TCA   | TTCA    | AGGA   | AG       | ---   | AG    | TTAGATA  | AAATATTTT | AAGAAT | CA          | TACAT  | CACC   | AGAT  | GT      | GA   | TTT     | AGGTGAC |        |         |          |        |        |      |      |         |

SARS-CoV-2 & Ad12.apr

|                                |        |            |           |          |            |           |         |         |           |             |             |           |         |            |               |          |           |       |          |           |          |        |       |       |      |      |       |    |        |    |
|--------------------------------|--------|------------|-----------|----------|------------|-----------|---------|---------|-----------|-------------|-------------|-----------|---------|------------|---------------|----------|-----------|-------|----------|-----------|----------|--------|-------|-------|------|------|-------|----|--------|----|
|                                |        |            |           |          |            |           |         |         |           |             | Section 316 |           |         |            |               |          |           |       |          |           |          |        |       |       |      |      |       |    |        |    |
| (30556)                        | 30556  | 30570      | 30580     | 30590    | 30600      | 30610     | 30620   | 30630   | 30640     | 30652       |             |           |         |            |               |          |           |       |          |           |          |        |       |       |      |      |       |    |        |    |
| Ad 12 X73487 (28589)           | --CATA | GGCTGGGT   | TTATGGA   | ATTATG   | TCTGGCTT   | AGTATTTG  | TCTGTAG | TTTCTTT | ACA       | ACTGTATG    | CGCGCCTT    | AATTT     | TAGT    | TGGA       | AT            |          |           |       |          |           |          |        |       |       |      |      |       |    |        |    |
| SARS-CoV-2 NC_045512.2 (25067) | ATCTCT | GGCATTAA   | TGCTTC    | AGTTG    | TAAACATTCA | AAAAGAAAT | TGACCG  | CTCAAT  | GAGGTT    | GC          | AA-GAAT     | --TTAAAT  | TGAAT   | CTCTCA     | TGATC         |          |           |       |          |           |          |        |       |       |      |      |       |    |        |    |
|                                |        |            |           |          |            |           |         |         |           |             | Section 317 |           |         |            |               |          |           |       |          |           |          |        |       |       |      |      |       |    |        |    |
| (30653)                        | 30653  | 30660      | 30670     | 30680    | 30690      | 30700     | 30710   | 30720   | 30730     | 30749       |             |           |         |            |               |          |           |       |          |           |          |        |       |       |      |      |       |    |        |    |
| Ad 12 X73487 (28683)           | AAGTAT | AC--TG--   | ATGATCTTC | CCGAATAT | CCAAACCC   | CCAGGAT   | GATTT   | -AC---- | CCC       | TAAATAT     | TGTAT       | TTT       | ---     | CCAG       | -----AGCC---- |          |           |       |          |           |          |        |       |       |      |      |       |    |        |    |
| SARS-CoV-2 NC_045512.2 (25161) | TCCA   | AGAACT     | TGGAAG    | TATGAG   | CAGTATAT   | AA        | -TGG    | CCATG   | GTACATT   | TGGCTAGGTTT | TATAGC      | TGGCTTGAT | TGTC    | CATAGTAATG | GTGACAA       |          |           |       |          |           |          |        |       |       |      |      |       |    |        |    |
|                                |        |            |           |          |            |           |         |         |           |             | Section 318 |           |         |            |               |          |           |       |          |           |          |        |       |       |      |      |       |    |        |    |
| (30750)                        | 30750  | 30760      | 30770     | 30780    | 30790      | 30800     | 30810   | 30820   | 30830     | 30846       |             |           |         |            |               |          |           |       |          |           |          |        |       |       |      |      |       |    |        |    |
| Ad 12 X73487 (28757)           | C-CC   | GGCTCCTCCT | TCTGT     | TGTTAG   | CTATTT     | TAA       | -GTTC   | ACCG    | --TGAAGAT | GATT        | --GAA       | -CCT      | GATCTAG | AAATTGATG  | GAAGAATC      | ACCGAAC  |           |       |          |           |          |        |       |       |      |      |       |    |        |    |
| SARS-CoV-2 NC_045512.2 (25257) | TTAT   | GCTTT      | ---GC     | TGTA     | TGACC      | AGTTGC    | TGTA    | GTTG    | TC        | CAAG        | GGCTGTTG    | TTC       | TTGT    | GATCCT     | --GCTGC       | AAATTGAT | GAAGA     | -CG   | ACT---   | C         |          |        |       |       |      |      |       |    |        |    |
|                                |        |            |           |          |            |           |         |         |           |             | Section 319 |           |         |            |               |          |           |       |          |           |          |        |       |       |      |      |       |    |        |    |
| (30847)                        | 30847  | 30860      | 30870     | 30880    | 30890      | 30900     | 30910   | 30920   | 30930     | 30943       |             |           |         |            |               |          |           |       |          |           |          |        |       |       |      |      |       |    |        |    |
| Ad 12 X73487 (28847)           | A      | GAGGCT     | CC        | TCAC     | TGATCGCGCT | AGG       | CAG     | GCC-A   | ACA       | GGATCA      | AAAA        | ATAA      | AGAG    | TTAATT     | GATTTT        | CAAA     | -ACCG     | TGCAT | CAGTGTAA | AAAA      | GGA      |        |       |       |      |      |       |    |        |    |
| SARS-CoV-2 NC_045512.2 (25345) | T      | GAG---     | CC        | AGT----- | GCTCAA     | AGG       | AGT     | C       | AAATT     | ACA         | TTACAC      | AT        | AAACG   | AA         | CTTA          | TGGATT   | TGTTTA    | TGA   | AATCTT   | CAC-----  | AA       | TT     | GGA   |       |      |      |       |    |        |    |
|                                |        |            |           |          |            |           |         |         |           |             | Section 320 |           |         |            |               |          |           |       |          |           |          |        |       |       |      |      |       |    |        |    |
| (30944)                        | 30944  | 30950      | 30960     | 30970    | 30980      | 30990     | 31000   | 31010   | 31020     | 31040       |             |           |         |            |               |          |           |       |          |           |          |        |       |       |      |      |       |    |        |    |
| Ad 12 X73487 (28942)           | CT     | TTTTTGCC   | TG        | GTAA     | AA         | CAAG      | CTA     | CCCTTC  | GCT-ATG   | AATCTTT     | ACC         | AGG       | CAAAGA  | ACAT       | CA            | ACTG     | TGCTACACG | CTGCC | CACT     | CAGC      | --GAC    | AAA    |       |       |      |      |       |    |        |    |
| SARS-CoV-2 NC_045512.2 (25426) | AC     | TGTA       | ACTTT     | TGA      | AGC        | AA        | G--     | GTGA    | AATCAA    | G           | GATGCT      | ACTC      | CTT     | CAGAT      | -TTT          | GTT      | CGCG      | CT    | ACTG     | CAACGATAC | CGATA    | CAAG   | CCT   | CACTC | CCTT |      |       |    |        |    |
|                                |        |            |           |          |            |           |         |         |           |             | Section 321 |           |         |            |               |          |           |       |          |           |          |        |       |       |      |      |       |    |        |    |
| (31041)                        | 31041  | 31050      | 31060     | 31070    | 31080      | 31090     | 31100   | 31110   | 31120     | 31137       |             |           |         |            |               |          |           |       |          |           |          |        |       |       |      |      |       |    |        |    |
| Ad 12 X73487 (29036)           | C      | TTTACTGCA  | AT        | GTG      | GGCTCG     | GTAC      | CTATT   | AAA     | GTGT      | CC          | CA          | ACAA      | GC      | AG-G       | AGAA          | CAAG     | AA        | GGCTC | TATTC    | GGTGC     | CTATGTGA | TA     | ACC   | CT    | GAAT |      |       |    |        |    |
| SARS-CoV-2 NC_045512.2 (25520) | T      | CGGATGGCTT | ATT       | GTG      | GGCGTT     | G         | ACTT    | CTT     | GCTGT     | TTT         | CA          | GAGC      | GC      | TTCC       | AAAA          | TCAT     | AA        | CCCTC | CA       | AAA       | GAGAT    | TGGCAA | --CTA | G     | CACT | CTCC |       |    |        |    |
|                                |        |            |           |          |            |           |         |         |           |             | Section 322 |           |         |            |               |          |           |       |          |           |          |        |       |       |      |      |       |    |        |    |
| (31138)                        | 31138  | 31150      | 31160     | 31170    | 31180      | 31190     | 31200   | 31210   | 31220     | 31234       |             |           |         |            |               |          |           |       |          |           |          |        |       |       |      |      |       |    |        |    |
| Ad 12 X73487 (29132)           | G      | TTT--      | GTAC      | ACTTT    | AA         | TAAA      | AAC--   | A       | CTGT      | GCGGT       | TT          | AAG       | AA      | ATC        | TTT           | TAC      | C--       | AATGA | AT       | TAAATAAAT | TA----   | CTT    | ACCG  | GA    | AA   | CT   | GAAAA | TA |        |    |
| SARS-CoV-2 NC_045512.2 (25615) | A      | AGGGT      | GT        | T        | CACTTT     | GT        | T       | GC      | AAC       | TTG         | CTGT        | TGTTG     | TT      | TGT        | AA            | CAG      | TTT       | ACT   | CA---    | ACC       | TTTT     | GCTCG  | T     | TGCTG | CTGG | CCTT | GA    | GC | CCCTTT | TC |

SARS-CoV-2 & Ad12.apr

Figure 1. SARS-CoV-2 NC\_045512.2 (25709) (31235) 31235 31240 31250 31260 31270 31280 31290 31300 31310 31320 31331

Ad 12 X73487 (29220) CATCATGGTCTCCGTGTACTCTTATAAAAA---TTCCCTCTTCCCAACTGTCTAAACCTGACAGACTTGC-AAAAGAGCAAA---CTTTCCTCCAAATC

SARS-CoV-2 NC\_045512.2 (25709) TCTATC-TTATATGCTTAGTCTACTTCTTGCAGAGTATAAACCTTGTAGAATAAATAATGAGGCTTTGCTTTTGCTGAAAATGCGTTTCCAAAAACC

Section 324

(31332) 31332 31340 31350 31360 31370 31380 31390 31400 31410 31428

Ad 12 X73487 (29309) TTA-AATGGGAAGG-TCAGATTCTTTC---TTCC---CAATCCCTACCCA---CATCTT-CATCTT-TTCAGATGAAGCGCA-GCAGAACCAGTA

SARS-CoV-2 NC\_045512.2 (25805) CATTAACTTTATGATGCAACTATTCTTCTTTGCTGGCATACCTAATTGTTACGACTATGTATACCTTACAAAGTAG-TGTAACTTCTTCAATTGTC-ATT

Section 325

(31429) 31429 31440 31450 31460 31470 31480 31490 31500 31510 31525

Ad 12 X73487 (29391) TGCAGAGAAACAGAGAAATGATG-ACCTTCAAC---CCCGTTTACCTTTTGTACCC--ATTGACATCATCAGACGTACCTTTTGTTCACCCCC

SARS-CoV-2 NC\_045512.2 (25900) ACTTCAGGTGATGACAAAGTCTATTTCTGAACATGACTACCAGATTGGTGGTTATACTGAAAAATGGGAATC-TGGAGTAAAGACTGTGT

Section 326

(31526) 31526 31540 31550 31560 31570 31580 31590 31600 31610 31622

Ad 12 X73487 (29481) TTTACTTCTTCCAATGGTCTTCAAGAAAACCAACCAGGTGTATTAGCACTTAATTACAAAGACCCCATTTGTAACTGAAATGGAACCTT-TACAC-

SARS-CoV-2 NC\_045512.2 (25996) GTATTACACAGT-TACTTCACCTTCAAGACTATT-ACCAGGTGTACTCAACTCA-ATTGAGTACAGACACTTGTGTG-TGAAATGTTACCTTCTTCACTC

Section 327

(31623) 31623 31630 31640 31650 31660 31670 31680 31690 31700 31719

Ad 12 X73487 (29576) -TCAAAGCTAGGGGACGGAATAAACTTATATGCCAA--GGTCAACTTACAGCTAGTAATAATATCAATG--TTTGGAG-GCCCTTACCAAACCTTC

SARS-CoV-2 NC\_045512.2 (26089) TACAAATAAATTGTTGATGAGCCTGAAGAACATGTCCAAATTCACACAAATCGACGGTTCATCCGGAGTTGTTAATCCAGTAATGGAACCAATTTATG

Section 328

(31720) 31720 31730 31740 31750 31760 31770 31780 31790 31800 31816

Ad 12 X73487 (29667) A--CAAGGTCTTAAACTTTCTTGGAGCGCCCCCTTAGCAGTAAAGGCTAGTGCCCTCACACTTAACACAGAAGCGCCCTTAACCACAACGGATGAAA

SARS-CoV-2 NC\_045512.2 (26186) ATGAACCGACGACGACTACTAGCTGTC---CTTTGTAGACAAAGCTGATG-----AGTACGAACCTTATGTACTCATTCGTTTCGGAAGAGACAT

Section 329

(31817) 31817 31830 31840 31850 31860 31870 31880 31890 31900 31913

Ad 12 X73487 (29762) GCTTAGCCTT-AAATAACGCCCTTCCATTACAGTAGAGTCTTCGC-GTTTGGGCTTGGCCACCAT--AGCCCTCTAAGCTTAGATG---GAGG

SARS-CoV-2 NC\_045512.2 (26272) GGTACGTTAATAGTTAATAGCGTACTTCTTTTCTTGCTTGTGTTATCTTGTCTAGTTACACTAGCCATCCTTACTGCGCTTCGATGTGTGCGT

SARS-CoV-2 & Ad12.apr

|                                |         |       |         |        |        |            |        |             |              |        |             |
|--------------------------------|---------|-------|---------|--------|--------|------------|--------|-------------|--------------|--------|-------------|
|                                |         |       |         |        |        |            |        |             |              |        | Section 330 |
| (31914)                        | 31914   | 31920 | 31930   | 31940  | 31950  | 31960      | 31970  | 31980       | 31990        | 32000  | 32010       |
| Ad 12 X73487 (29850)           | TGGAAAC | CTAGG | TTTAA   | ATCTT  | TCTGCT | CCCCCTGG   | ---AG  | GGTT        | AGTAACAACAAT | TTGCAT | TCTC        |
| SARS-CoV-2 NC_045512.2 (26369) | ACTGCTG | CAATA | TTGTT   | AACGT  | GAGTCT | TGTAAACCTT | CTTT   | TACGTTTACTC | TCTGT        | TAA    | AAATCTG     |
|                                |         |       |         |        |        |            |        |             |              |        | Section 331 |
| (32011)                        | 32011   | 32020 | 32030   | 32040  | 32050  | 32060      | 32070  | 32080       | 32090        | 32107  |             |
| Ad 12 X73487 (29942)           | GCGGT   | TGCC  | CTATCTG | TGCTAC | TGCAG  | -ACCCCA    | TAA-G  | TGTT        | CGCAAC       | AACGC  | TCTTA       |
| SARS-CoV-2 NC_045512.2 (26466) | GGTCT   | TAAAC | --GAAC  | TAAAT  | TATATT | ---AGT     | TTTTC  | TGTT        | TGGAAC       | TTTAA  | TTT         |
|                                |         |       |         |        |        |            |        |             |              |        | Section 332 |
| (32108)                        | 32108   | 32120 | 32130   | 32140  | 32150  | 32160      | 32170  | 32180       | 32190        | 32204  |             |
| Ad 12 X73487 (30037)           | GCGTT   | GGGA  | ATAAG   | TGCTAC | CTAG   | TCCAT      | TACAG  | TAA-T       | AAACGG       | TTCCT  | TAG         |
| SARS-CoV-2 NC_045512.2 (26553) | GAAGA   | GCTT  | AAAA    | -GCTC  | CTT    | -GAACA     | ATGGA  | ACCTAG      | TAA          | TAGGT  | TTCCT       |
|                                |         |       |         |        |        |            |        |             |              |        | Section 333 |
| (32205)                        | 32205   | 32210 | 32220   | 32230  | 32240  | 32250      | 32260  | 32270       | 32280        | 32290  | 32301       |
| Ad 12 X73487 (30128)           | CTT     | TAA   | GTCT    | TG---  | TCTGTT | GCC        | AAT-CC | TCTGA       | CTATTT       | GACA-  | AGACA       |
| SARS-CoV-2 NC_045512.2 (26648) | GAA     | TAG   | GT      | TTTGT  | TATATA | ATTAA      | GTAA   | TTTTC       | CTCT         | GGGT   | GT          |
|                                |         |       |         |        |        |            |        |             |              |        | Section 334 |
| (32302)                        | 32302   | 32310 | 32320   | 32330  | 32340  | 32350      | 32360  | 32370       | 32380        | 32398  |             |
| Ad 12 X73487 (30211)           | G--     | GGT   | CTCA    | ATTAG  | TAA    | CAAGAA     | TAGG   | GATG        | TTTAA        | CA     | TT          |
| SARS-CoV-2 NC_045512.2 (26744) | TTG     | GAT   | ---C    | ACCG   | GTGGA  | ATTGC      | TATC   | CAAT        | GCT          | TGTC   | TT          |
|                                |         |       |         |        |        |            |        |             |              |        | Section 335 |
| (32399)                        | 32399   | 32410 | 32420   | 32430  | 32440  | 32450      | 32460  | 32470       | 32480        | 32495  |             |
| Ad 12 X73487 (30297)           | TTCTG   | GCG   | GTA     | GAATAA | TTTTAG | ATGT       | TAA-TT | ATCC        | CTTT         | GATG   | CGAG        |
| SARS-CoV-2 NC_045512.2 (26829) | TTTGC   | GCG   | TAC     | GCG--T | TCCAT  | GTG        | TCA    | ATCC        | A---         | GAAAC  | TAA         |
|                                |         |       |         |        |        |            |        |             |              |        | Section 336 |
| (32496)                        | 32496   | 32510 | 32520   | 32530  | 32540  | 32550      | 32560  | 32570       | 32580        | 32592  |             |
| Ad 12 X73487 (30393)           | TACAAA  | C-T   | GGA     | CTTAA  | CACT   | GATATT     | AGTA   | -----       | CCGAA        | -----  | AAAGG       |
| SARS-CoV-2 NC_045512.2 (26916) | CCGCTT  | CTA   | GAA     | GTG    | AAC    | TCGT       | TAT    | CGG         | AG           | CTGT   | GAT         |



SARS-CoV-2 & Ad12.apr

|                                |              |            |             |           |                 |             |             |                |           |              |                      |             |              |            |               |         |          |       |        |        |        |       |       |      |      |       |     |     |     |    |   |      |     |
|--------------------------------|--------------|------------|-------------|-----------|-----------------|-------------|-------------|----------------|-----------|--------------|----------------------|-------------|--------------|------------|---------------|---------|----------|-------|--------|--------|--------|-------|-------|------|------|-------|-----|-----|-----|----|---|------|-----|
|                                |              |            |             |           |                 |             |             |                |           |              |                      | Section 337 |              |            |               |         |          |       |        |        |        |       |       |      |      |       |     |     |     |    |   |      |     |
| (32593)                        | 32593        | 32600      | 32610       | 32620     | 32630           | 32640       | 32650       | 32660          | 32670     | 32689        |                      |             |              |            |               |         |          |       |        |        |        |       |       |      |      |       |     |     |     |    |   |      |     |
| Ad 12 X73487 (30472)           | --GGTCAGGGGC | TTACATTTAA | TAATGG-CAAC | --TTAGGGT | ---AAGTTGGGAGCT | GGA         | CTTA-TTTTGA | -TCAAACAATAACA | TTGC      | CTTA         |                      |             |              |            |               |         |          |       |        |        |        |       |       |      |      |       |     |     |     |    |   |      |     |
| SARS-CoV-2 NC_045512.2 (27013) | TGCC         | TAAAGAAA   | TCAC        | TGTTGC    | TACATCA         | GAAACGC     | TTTCTTA     | TACAA          | TTGGGAGCT | TCG          | CAGCGTGTAGCAGGT--GAC | TCAGGTTTGC  | TGCA         |            |               |         |          |       |        |        |        |       |       |      |      |       |     |     |     |    |   |      |     |
|                                |              |            |             |           |                 |             |             |                |           |              |                      | Section 338 |              |            |               |         |          |       |        |        |        |       |       |      |      |       |     |     |     |    |   |      |     |
| (32690)                        | 32690        | 32700      | 32710       | 32720     | 32730           | 32740       | 32750       | 32760          | 32770     | 32786        |                      |             |              |            |               |         |          |       |        |        |        |       |       |      |      |       |     |     |     |    |   |      |     |
| Ad 12 X73487 (30559)           | GG           | CAGCAGCAG  | CAACACTCCAT | ACGACCC   | TC--TGACAC      | TGTG        | GACAACTCC   | TGACCCACCA     | CAAAC     | TGCAGCCTC    | ATACAAGA             | GCTAG       | GATGCAA      |            |               |         |          |       |        |        |        |       |       |      |      |       |     |     |     |    |   |      |     |
| SARS-CoV-2 NC_045512.2 (27108) | TA           | CAGTC      | GCTA        | CAGGAT    | TGGCA           | ACT--ATAAAT | TAAAC       | -ACAGAC        | CAT       | TCC--AG--TAG | C---AGTGACAAT--AT    | TGCTTT      | GCTTGTACAGTA |            |               |         |          |       |        |        |        |       |       |      |      |       |     |     |     |    |   |      |     |
|                                |              |            |             |           |                 |             |             |                |           |              |                      | Section 339 |              |            |               |         |          |       |        |        |        |       |       |      |      |       |     |     |     |    |   |      |     |
| (32787)                        | 32787        | 32800      | 32810       | 32820     | 32830           | 32840       | 32850       | 32860          | 32870     | 32883        |                      |             |              |            |               |         |          |       |        |        |        |       |       |      |      |       |     |     |     |    |   |      |     |
| Ad 12 X73487 (30654)           | ACTCAC       | --CCTGTG   | CTTAA       | CAAAAAACG | GA---TC---      | TATGT       | --TAATGG    | CAT-TG         | TAA       | GT           | TAGTGG               | ---TGTTAA   | GGT          | TAATCTCCTA | AAT           |         |          |       |        |        |        |       |       |      |      |       |     |     |     |    |   |      |     |
| SARS-CoV-2 NC_045512.2 (27191) | AG           | TGACAA     | CAGA        | TGTTTCA   | TCTC--GTT       | GACTT       | TCAGGT      | TACTATAGC      | AGAGAT    | AT           | TACTAA               | TATTATGAG   | GAC          | TTTTAAAGT  | T             | TCCA    | TTTGG    | AAT   |        |        |        |       |       |      |      |       |     |     |     |    |   |      |     |
|                                |              |            |             |           |                 |             |             |                |           |              |                      | Section 340 |              |            |               |         |          |       |        |        |        |       |       |      |      |       |     |     |     |    |   |      |     |
| (32884)                        | 32884        | 32890      | 32900       | 32910     | 32920           | 32930       | 32940       | 32950          | 32960     | 32970        | 32980                |             |              |            |               |         |          |       |        |        |        |       |       |      |      |       |     |     |     |    |   |      |     |
| Ad 12 X73487 (30736)           | ATCCAA       | -AGTAC     | TACT        | ACCA      | CTGT            | AGGAGTGCA   | TTTAGT      | GTTT           | TGATGA    | AACAGGGAA    | GAT                  | TAA-T       | TCACA        | TCAA       | CCCCTACTG     | CCCT    | G        | GTT   | CCCCAA | G      |        |       |       |      |      |       |     |     |     |    |   |      |     |
| SARS-CoV-2 NC_045512.2 (27286) | C            | TTGATT     | ACAT        | CATAA     | ACCT            | CATAATT     | AAAAAT      | TTATC          | TAGTCACT  | AAC          | TGAGAA               | ---TAAAT    | TATTC        | TCAA       | TTAGATGA--AGA | GCAA    | CCAATG   | GA    |        |        |        |       |       |      |      |       |     |     |     |    |   |      |     |
|                                |              |            |             |           |                 |             |             |                |           |              |                      | Section 341 |              |            |               |         |          |       |        |        |        |       |       |      |      |       |     |     |     |    |   |      |     |
| (32981)                        | 32981        | 32990      | 33000       | 33010     | 33020           | 33030       | 33040       | 33050          | 33060     | 33077        |                      |             |              |            |               |         |          |       |        |        |        |       |       |      |      |       |     |     |     |    |   |      |     |
| Ad 12 X73487 (30831)           | TTCGT        | GGGG       | ATATAG      | ACAAGGCC  | AATCAGT         | GTCT        | ACCAAT      | ACTG           | TT-AC     | CAAT         | GGTCTAG              | GT          | TTTTATGCC    | TAA        | TGTGAGT       | GCT     | T        | ACCC  | TAG    | ACCAA  |        |       |       |      |      |       |     |     |     |    |   |      |     |
| SARS-CoV-2 NC_045512.2 (27378) | GATT-        | GATT       | AA          | ACGA      | ACA             | TGAAA       | ATTATTCT    | TTTCTTGGC      | ACTG      | ATAAC        | ACTCG                | CTACTT      | GT           | GAGCTTTAT  | CACTACCAAG    | GAGT    | GTGT     | TAG   | AGGT   | A      |        |       |       |      |      |       |     |     |     |    |   |      |     |
|                                |              |            |             |           |                 |             |             |                |           |              |                      | Section 342 |              |            |               |         |          |       |        |        |        |       |       |      |      |       |     |     |     |    |   |      |     |
| (33078)                        | 33078        | 33090      | 33100       | 33110     | 33120           | 33130       | 33140       | 33150          | 33160     | 33174        |                      |             |              |            |               |         |          |       |        |        |        |       |       |      |      |       |     |     |     |    |   |      |     |
| Ad 12 X73487 (30927)           | TGC          | CAGT       | GAGGC       | TAAAAG    | CCAAA           | TG          | GT          | TAGTC          | TCAC      | GTACT        | TAC-AGGG             | AGAT        | ---ACAT      | C          | TAA           | CC----- | TATAA    | -CAAT | GAAAGT | TG-CAT | T      |       |       |      |      |       |     |     |     |    |   |      |     |
| SARS-CoV-2 NC_045512.2 (27474) | AA-          | CAGT       | ACTTT       | TAAAAG    | AACCT           | TGCTC       | ---T        | CTG            | GAACA     | TAC          | GAGGG                | CAAT        | TCAC         | CAT        | TTCAT         | CC      | TCTAGCTG | ATAA  | CA     | AAT    | TTGCAC | TGACT | TG    |      |      |       |     |     |     |    |   |      |     |
|                                |              |            |             |           |                 |             |             |                |           |              |                      | Section 343 |              |            |               |         |          |       |        |        |        |       |       |      |      |       |     |     |     |    |   |      |     |
| (33175)                        | 33175        | 33180      | 33190       | 33200     | 33210           | 33220       | 33230       | 33240          | 33250     | 33260        | 33271                |             |              |            |               |         |          |       |        |        |        |       |       |      |      |       |     |     |     |    |   |      |     |
| Ad 12 X73487 (31011)           | TAA          | TG         | GCAT        | T-----    | -AC             | GT          | CG          | C              | TAAAT     | GG           | A                    | TACTC       | T            | TAA        | CAT           | T--CAT  | GT       | -G    | TCAG   | GT     | C      | TAT   | CAA-- | ACT  | AT-- | ATAA  | AT  | C-- |     |    |   |      |     |
| SARS-CoV-2 NC_045512.2 (27567) | CTT          | TA         | GCAT        | T         | CAATTT          | GCTTT       | TGCTT       | GT             | C         | T            | GAC                  | GGCG        | TAA          | A          | CACG          | T       | CTAT     | CAGT  | TAC    | GTG    | CCAG   | GATCA | GT    | TTCA | C    | CCTAA | ACT | G   | TTC | AT | C | AGAC | CAA |

## SARS-CoV-2 &amp; Ad12.apr

|                                |         |       |          |       |        |       |        |          |       |          |          |       |        |         |          |             |         |        |         |      |                    |                     |      |      |     |       |      |       |     |      |       |        |     |      |       |       |        |     |     |     |     |     |     |
|--------------------------------|---------|-------|----------|-------|--------|-------|--------|----------|-------|----------|----------|-------|--------|---------|----------|-------------|---------|--------|---------|------|--------------------|---------------------|------|------|-----|-------|------|-------|-----|------|-------|--------|-----|------|-------|-------|--------|-----|-----|-----|-----|-----|-----|
|                                |         |       |          |       |        |       |        |          |       |          |          |       |        |         |          | Section 344 |         |        |         |      |                    |                     |      |      |     |       |      |       |     |      |       |        |     |      |       |       |        |     |     |     |     |     |     |
|                                | (33272) | 33272 | 33280    | 33290 | 33300  | 33310 | 33320  | 33330    | 33340 | 33350    | 33368    |       |        |         |          |             |         |        |         |      |                    |                     |      |      |     |       |      |       |     |      |       |        |     |      |       |       |        |     |     |     |     |     |     |
| Ad 12 X73487 (31082)           | --AGCCT | TTC   | TCTA     | CACCA | ATC    | CTG   | CTCC   | TTTTCTTA | CA    | TTAC     | C        | CAAG  | AAT    | AAAA    | AC       | ACACA       | -----CA | A      | -----AA | ---  |                    |                     |      |      |     |       |      |       |     |      |       |        |     |      |       |       |        |     |     |     |     |     |     |
| SARS-CoV-2 NC_045512.2 (27664) | GAG     | G     | AAG      | TTC   | AAG    | A     | CTTT   | ACT      | CTC   | CAAT     | TTTTCTTA | TTG   | TT     | G       | GG       | CAA         | T       | AGT    | GTTT    | ATA  | ACACTTTGCTTCACACTC | AAAAGAAAGACAGAATGAT |      |      |     |       |      |       |     |      |       |        |     |      |       |       |        |     |     |     |     |     |     |
|                                |         |       |          |       |        |       |        |          |       |          |          |       |        |         |          | Section 345 |         |        |         |      |                    |                     |      |      |     |       |      |       |     |      |       |        |     |      |       |       |        |     |     |     |     |     |     |
|                                | (33369) | 33369 | 33380    | 33390 | 33400  | 33410 | 33420  | 33430    | 33440 | 33450    | 33465    |       |        |         |          |             |         |        |         |      |                    |                     |      |      |     |       |      |       |     |      |       |        |     |      |       |       |        |     |     |     |     |     |     |
| Ad 12 X73487 (31146)           | CAC     | AAA   | TTGCG    | TAC   | TTATTG | T     | TATTT  | T        | TTTT  | -----    | T        | TT    | TAC    | CTATACG | C        | TG          | GTT     | AA     | ACT     | GCC  | TC                 | CTT                 | CCC  | ATT  | T   | --    | TAC  | CT    | TGT | A    | TAC   |        |     |      |       |       |        |     |     |     |     |     |     |
| SARS-CoV-2 NC_045512.2 (27761) | TGA     | A     | CT       | TT    | CAT    | TA    | A      | TTGACT   | T     | C        | TATTT    | G     | TGC    | TTTT    | TAGCCTT  | T           | C       | T      | GCTA    | ---- | TTC                | C                   | TT   | GTT  | TT  | AA    | TTA  | T     | G   | CTT  | ATT   | AT     | CT  | TTT  | TGGT  | T     | CTC    | A   | CTT |     |     |     |     |
|                                |         |       |          |       |        |       |        |          |       |          |          |       |        |         |          | Section 346 |         |        |         |      |                    |                     |      |      |     |       |      |       |     |      |       |        |     |      |       |       |        |     |     |     |     |     |     |
|                                | (33466) | 33466 | 33480    | 33490 | 33500  | 33510 | 33520  | 33530    | 33540 | 33550    | 33562    |       |        |         |          |             |         |        |         |      |                    |                     |      |      |     |       |      |       |     |      |       |        |     |      |       |       |        |     |     |     |     |     |     |
| Ad 12 X73487 (31234)           | CTC     | C     | TTTTCCCC | C     | -----  | TTT   | GT     | AG       | CT    | GAAAACAA | CTGC     | A     | CTTGA  | ATAT    | T        | CGA         | C       | TTAGGT | TTTT    | TGGC | G                  | TT                  | AG   | CG   | TC  | CAC   | AC   | AG    | TTT | C    | ----- | TTT    | AC  | GGG  | CAA   |       |        |     |     |     |     |     |     |
| SARS-CoV-2 NC_045512.2 (27852) | GAA     | C     | TG       | CA    | AGAT   | CA    | TAATG  | AA       | ACT   | TGT      | CACG     | C     | TA     | A       | ACGA     | --          | CAT     | G      | AA      | AT   | TT                 | CTTG                | TTTT | CTTA | G   | GA    | AT   | CA    | TC  | ACA  | AC    | GT     | AG  | C    | TG    | CAT   | TT     | CA  | CA  |     |     |     |     |
|                                |         |       |          |       |        |       |        |          |       |          |          |       |        |         |          | Section 347 |         |        |         |      |                    |                     |      |      |     |       |      |       |     |      |       |        |     |      |       |       |        |     |     |     |     |     |     |
|                                | (33563) | 33563 | 33570    | 33580 | 33590  | 33600 | 33610  | 33620    | 33630 | 33640    | 33659    |       |        |         |          |             |         |        |         |      |                    |                     |      |      |     |       |      |       |     |      |       |        |     |      |       |       |        |     |     |     |     |     |     |
| Ad 12 X73487 (31329)           | AG      | CGA   | G        | GGT   | CGGTGA | TGG   | AAA    | C        | GAA   | -T       | CC       | C     | TCGCC  | G       | -        | CACAG       | T       | CAC    | --      | T    | CA                 | AG                  | CGG  | CAT  | TC  | CC    | CAT  | C     | CA  | AAA  | C     | AGGTCC | A   | TGAT | TT    | TAT   | CCT    | ACA |     |     |     |     |     |
| SARS-CoV-2 NC_045512.2 (27947) | AGA     | AT    | G        | ----  | TAG    | TTT   | TAC    | AG       | T     | CAT      | GTA      | CT    | CA     | ACAT    | CA       | A           | C       | CAT    | A       | T    | GTA                | GT                  | AGT  | T    | GAT | G     | ACC  | CG    | T   | GT   | CC    | TAT    | CA  | CTT  | CTA   | ATT   | CTA    | AAT | GGT | TAT | TAT | TAG | AGT |
|                                |         |       |          |       |        |       |        |          |       |          |          |       |        |         |          | Section 348 |         |        |         |      |                    |                     |      |      |     |       |      |       |     |      |       |        |     |      |       |       |        |     |     |     |     |     |     |
|                                | (33660) | 33660 | 33670    | 33680 | 33690  | 33700 | 33710  | 33720    | 33730 | 33740    | 33756    |       |        |         |          |             |         |        |         |      |                    |                     |      |      |     |       |      |       |     |      |       |        |     |      |       |       |        |     |     |     |     |     |     |
| Ad 12 X73487 (31422)           | AAA     | AG    | TAA      | ACA   | AC     | AG    | TCAG   | TGT      | C     | CAT      | CA       | GCCG  | CCCCAA | G       | GAT      | T           | CTCTC   | G      | -T      | TG   | ATT                | -AT                 | AAT  | CT   | CC  | AA    | AT   | AAA   | AT  | TG   | CT    | CG     | AT  | GAT  | GC    | AT    | AATTA  | AAC |     |     |     |     |     |
| SARS-CoV-2 NC_045512.2 (28040) | AGG     | AG    | CT       | AG    | -----  | TC    | AG     | CAC      | CTT   | TA       | ATTGA    | ATTGT | G      | CG      | T        | GGAT        | G       | AG     | GC      | TG   | G                  | TT                  | CTA  | AAT  | C   | ACC   | -CAT | TC    | AG  | TACA | TC    | GAT    | ATC | G    | GT    | ----- | AATTA  | TAC |     |     |     |     |     |
|                                |         |       |          |       |        |       |        |          |       |          |          |       |        |         |          | Section 349 |         |        |         |      |                    |                     |      |      |     |       |      |       |     |      |       |        |     |      |       |       |        |     |     |     |     |     |     |
|                                | (33757) | 33757 | 33770    | 33780 | 33790  | 33800 | 33810  | 33820    | 33830 | 33840    | 33853    |       |        |         |          |             |         |        |         |      |                    |                     |      |      |     |       |      |       |     |      |       |        |     |      |       |       |        |     |     |     |     |     |     |
| Ad 12 X73487 (31517)           | CTTTAGC | AGTT  | GCTGA    | C     | -GATA  | AC    | GT     | CAT      | GCCG  | AC       | TA       | TG    | TT     | T       | TAGAGGGC | GAAC        | AG      | T      | GTT     | TT   | CA                 | G                   | CA   | AT   | TA  | CTTGA | ACAA | C     | TT  | TAA  | C     | ATT    | A   | G    | CAG   |       |        |     |     |     |     |     |     |
| SARS-CoV-2 NC_045512.2 (28133) | -----   | AGTT  | T        | --    | C      | CT    | GT     | TT       | AC    | CTT      | T        | ----- | TAC    | AA      | --       | TT          | AAT     | TGCCAG | GAAC    | -C   | T                  | AAA                 | TT   | GG   | T   | AGT   | --   | CTTGT | AGT | G    | CTT   | GTT    | C   | ---- | G     | ----  |        |     |     |     |     |     |     |
|                                |         |       |          |       |        |       |        |          |       |          |          |       |        |         |          | Section 350 |         |        |         |      |                    |                     |      |      |     |       |      |       |     |      |       |        |     |      |       |       |        |     |     |     |     |     |     |
|                                | (33854) | 33854 | 33860    | 33870 | 33880  | 33890 | 33900  | 33910    | 33920 | 33930    | 33940    | 33950 |        |         |          |             |         |        |         |      |                    |                     |      |      |     |       |      |       |     |      |       |        |     |      |       |       |        |     |     |     |     |     |     |
| Ad 12 X73487 (31613)           | TC      | TGG   | TAC      | GAC   | GAG    | C     | GCAAC  | AG       | CG    | CAT      | GCGT     | ATC   | T      | CAC     | T        | TAA         | GT      | CTT    | TACAA   | T    | ATC                | AC                  | AAC  | -AC  | AGC | ACT   | AA   | CAT   | GT  | TA   | -TTT  | AAA    | AT  | TCC  | ATAAT |       |        |     |     |     |     |     |     |
| SARS-CoV-2 NC_045512.2 (28203) | --      | TTC   | TAT      | GA    | AG     | -A    | CTTTTT | AG       | AGT   | AT       | CAT      | GAC   | GT     | TCG     | T        | GTT         | GT      | TTT    | TAGATT  | T    | CATC               | TAA                 | AC   | G    | A   | CAAA  | ACT  | AA    | AAT | GT   | CTG   | --     | A   | T    | AAT   | GG    | ACCCCA |     |     |     |     |     |     |

SARS-CoV-2 & Ad12.apr

|                                |         |                          |           |           |         |          |         |                 |         |        |               |         |           |             |           |             |        |       |       |       |          |          |           |       |         |        |       |         |       |        |           |       |     |
|--------------------------------|---------|--------------------------|-----------|-----------|---------|----------|---------|-----------------|---------|--------|---------------|---------|-----------|-------------|-----------|-------------|--------|-------|-------|-------|----------|----------|-----------|-------|---------|--------|-------|---------|-------|--------|-----------|-------|-----|
|                                |         | Section 351              |           |           |         |          |         |                 |         |        |               |         |           |             |           |             |        |       |       |       |          |          |           |       |         |        |       |         |       |        |           |       |     |
|                                | (33951) | 33951                    | 33960     | 33970     | 33980   | 33990    | 34000   | 34010           | 34020   | 34030  | 34047         |         |           |             |           |             |        |       |       |       |          |          |           |       |         |        |       |         |       |        |           |       |     |
| Ad 12 X73487 (31708)           |         | TAA--AG-GCGCTCCATCCAAAAC | TAC       | TTT       | TTCTA   | ACGC--TA | ACGAGG  | CATGGGC         | CATCAT  | ACATA  | ATTTTAAAGT-AA | AATTA   | AAT--GGCG | ACCT        |           |             |        |       |       |       |          |          |           |       |         |        |       |         |       |        |           |       |     |
| SARS-CoV-2 NC_045512.2 (28294) |         | AAATCAGCGAAATGCACCCCGCAT | TACG      | TTT       | GGTGG   | ACCTCAG  | ATTCAA  | C-TGGCA         | A--GTA  | AC     | CAGA          | -----AT | G         | GAGAA       | CGCAG     | TGGGGCG--CG |        |       |       |       |          |          |           |       |         |        |       |         |       |        |           |       |     |
|                                |         | Section 352              |           |           |         |          |         |                 |         |        |               |         |           |             |           |             |        |       |       |       |          |          |           |       |         |        |       |         |       |        |           |       |     |
|                                | (34048) | 34048                    | 34060     | 34070     | 34080   | 34090    | 34100   | 34110           | 34120   | 34130  | 34144         |         |           |             |           |             |        |       |       |       |          |          |           |       |         |        |       |         |       |        |           |       |     |
| Ad 12 X73487 (31797)           |         | CTAACAAAGGTGCTTC         | CC        | CATACAT   | CACCTCT | T        | TAGGC   | CATTAAAT--GGTTA | ---ACAA | CCTC   | CCGATACCA     | AAAAC   | ACCTT     | TT---GTTAAT | TAA       |             |        |       |       |       |          |          |           |       |         |        |       |         |       |        |           |       |     |
| SARS-CoV-2 NC_045512.2 (28381) |         | ATCAAACAAC               | GTCGG     | CCCAAGGT  | TACC    | CAA      | TATAC   | TGCGTC          | TTGGTT  | CA     | CCGCTCT       | C       | ACT       | CAACAT      | TGGCAAGGA | AGACC       | TTAAAT | TCCC  | TCGA  |       |          |          |           |       |         |        |       |         |       |        |           |       |     |
|                                |         | Section 353              |           |           |         |          |         |                 |         |        |               |         |           |             |           |             |        |       |       |       |          |          |           |       |         |        |       |         |       |        |           |       |     |
|                                | (34145) | 34145                    | 34150     | 34160     | 34170   | 34180    | 34190   | 34200           | 34210   | 34220  | 34230         | 34241   |           |             |           |             |        |       |       |       |          |          |           |       |         |        |       |         |       |        |           |       |     |
| Ad 12 X73487 (31886)           |         | GGCGC                    | CATATACGG | CCATTTTGA | ACCA    | GCGT     | CCAAAAG | -CAT            | CC      | CAGCT  | TGACATAC      | ACTGT   | AGTGAAC   | CCG         | GACG      | CTGG        | CAATG  | ACAA  | TGA   | ATAAG |          |          |           |       |         |        |       |         |       |        |           |       |     |
| SARS-CoV-2 NC_045512.2 (28478) |         | GG                       | A--CA     | AGGCGTT   | CCA     | ATT      | AAC     | ACCA            | ATAG    | CAGTCC | AG            | ATGA    | CCAAAT    | TGG         | TACT      | AC          | G      | AAGAG | CTA   | CCA   | GACGAATT | CG       | TG        | GTGG  | TGA--CG | G      |       |         |       |        |           |       |     |
|                                |         | Section 354              |           |           |         |          |         |                 |         |        |               |         |           |             |           |             |        |       |       |       |          |          |           |       |         |        |       |         |       |        |           |       |     |
|                                | (34242) | 34242                    | 34250     | 34260     | 34270   | 34280    | 34290   | 34300           | 34310   | 34320  | 34338         |         |           |             |           |             |        |       |       |       |          |          |           |       |         |        |       |         |       |        |           |       |     |
| Ad 12 X73487 (31982)           |         | CC                       | ACCGCTC   | ATGA      | C       | CAT      | GT      | AAATA           | -ATT    | GAGT   | AA            | CTT     | CA        | ACAT        | TTT--AT   | AGT         | GG     | CAC   | AA    | CACAT | AC       | ATA      | C         | ACTC  | ATG     | TATTT  | TTTTT | CC      | AAAT  | AT---- | AAA       |       |     |
| SARS-CoV-2 NC_045512.2 (28570) |         | TAA                      | AATGAA    | AGAT      | C       | TCA      | GT      | CCA             | AGAT    | G      | TAT           | TT      | CT        | ACT         | T         | AGGA        | ACT    | GG    | C     | AG    | AA       | GCTGG    | ACT       | T     | CC--T   | ATG    | GTGCT | TAACA   | AA    | AG     | ACGGCATCA |       |     |
|                                |         | Section 355              |           |           |         |          |         |                 |         |        |               |         |           |             |           |             |        |       |       |       |          |          |           |       |         |        |       |         |       |        |           |       |     |
|                                | (34339) | 34339                    | 34350     | 34360     | 34370   | 34380    | 34390   | 34400           | 34410   | 34420  | 34435         |         |           |             |           |             |        |       |       |       |          |          |           |       |         |        |       |         |       |        |           |       |     |
| Ad 12 X73487 (32072)           |         | CAT                      | CTCA      | TAA       | TC      | AG       | TTAG    | AATCATA         | T       | CCC    | A             | CGGTAT  | TGGCC     | AT          | TC        | CTGCA       | GCAC   | TGTA  | AAA   | CCT   | AC       | ACATG    | AAGGA     | ---AT | G       | CT     | CT    | TA----- | CC    |        |           |       |     |
| SARS-CoV-2 NC_045512.2 (28665) |         | TAT                      | GGGT      | TGC-A     | AC      | T        | AG      | GGGAGCCT        | T       | GA-    | A             | TACACCA | AAAAG     | AT          | CA        | CATTG       | GCAC   | CCGC  | AA    | T     | CCT      | G        | CTA       | AC-AA | T       | GCTGC  | AAT   | CG      | T     | G      | CA        | CACTT | CC  |
|                                |         | Section 356              |           |           |         |          |         |                 |         |        |               |         |           |             |           |             |        |       |       |       |          |          |           |       |         |        |       |         |       |        |           |       |     |
|                                | (34436) | 34436                    | 34450     | 34460     | 34470   | 34480    | 34490   | 34500           | 34510   | 34520  | 34532         |         |           |             |           |             |        |       |       |       |          |          |           |       |         |        |       |         |       |        |           |       |     |
| Ad 12 X73487 (32160)           |         | TCA                      | -CTT      | ACA       | TT      | AT       | GTAA    | AGTC            | AG      | ACTA   | TT            | AC      | ACT       | CAG         | GCC       | A           | TAA    | AG    | A     | TTTT  | C        | G        | AAGTACTCA | ACGT  | AG-CT   | TTT    | TGACT | GTT     | CCT   | CA     | CAGG      | G     | CGG |
| SARS-CoV-2 NC_045512.2 (28759) |         | TCA                      | AGGA      | ACA       | AC      | AT       | TGCC    | A---            | AA      | AGG    | CT            | CT      | AC        | G           | CAG--     | A           | AGG    | AG    | CA    | GAGG  | C        | GGC----- | AGTC      | AAG   | CT      | CT     | TCTC  | GTT     | CCT   | CA     | TCAC      | G     | TAG |
|                                |         | Section 357              |           |           |         |          |         |                 |         |        |               |         |           |             |           |             |        |       |       |       |          |          |           |       |         |        |       |         |       |        |           |       |     |
|                                | (34533) | 34533                    | 34540     | 34550     | 34560   | 34570    | 34580   | 34590           | 34600   | 34610  | 34629         |         |           |             |           |             |        |       |       |       |          |          |           |       |         |        |       |         |       |        |           |       |     |
| Ad 12 X73487 (32255)           |         | TAG                      | TTGGT     | -A        | CTT     | GTT      | G--     | TATGGTGC        | -       | CAA    | TCTGTAGCG     | A       | TAC       | CGT         | CT        | GT          | CG     | CG    | CTG   | CA    | TC       | GTA      | AACAAC    | AGAC  | TT      | GCGAGC | GTCTT | CG      | TACT  | TA     |           |       |     |
| SARS-CoV-2 NC_045512.2 (28843) |         | TC                       | GC--      | AAC       | AG      | TT       | CAAG    | A               | AA----- | ATT    | CAA           | CT--C   | ---       | C           | AGG       | CAG-        | CAGT   | AGG   | GAACT | TC    | TCTG     | ---CT    | AGA       | AT    | TGCT    | TGGC   | AATGG | CG      | GTGAT | G      |           |       |     |

SARS-CoV-2 & Ad12.apr

|                                |        |         |          |        |       |       |          |        |       |          |             |          |       |           |     |       |                   |     |      |        |               |       |     |    |            |    |       |     |        |       |   |      |     |   |   |   |   |       |   |   |    |   |   |   |   |     |   |   |   |   |   |   |   |   |   |   |   |   |   |   |      |   |   |   |   |   |   |   |   |   |   |   |   |   |   |   |   |   |   |   |   |   |   |   |   |   |   |   |   |   |   |   |   |   |   |   |   |   |   |   |   |   |   |   |   |   |   |   |   |   |   |   |   |   |   |   |   |   |   |   |   |   |   |   |   |   |   |   |   |   |   |   |   |   |   |   |   |   |   |   |   |   |   |   |   |   |   |   |   |   |   |   |   |   |   |   |   |   |   |   |   |   |   |   |   |   |   |   |   |   |   |   |   |   |   |   |   |   |   |   |   |   |   |   |   |   |   |   |   |   |   |   |   |   |   |   |   |   |   |   |   |   |   |   |   |   |   |   |   |   |   |   |   |   |   |   |   |   |   |   |   |   |   |   |   |   |   |   |   |   |   |   |   |   |   |   |   |   |   |   |   |   |   |   |   |   |   |   |   |   |   |   |   |   |   |   |   |   |   |   |   |   |   |   |   |   |   |   |   |   |   |   |   |   |   |   |   |   |   |   |   |   |   |   |   |   |   |   |   |   |   |   |   |   |   |   |   |   |   |   |   |   |   |   |   |   |   |   |   |   |   |   |   |   |   |   |   |   |   |   |   |   |   |   |   |   |   |   |   |   |   |   |   |   |   |   |   |   |   |   |   |   |   |   |   |   |   |   |   |   |   |   |   |   |   |   |   |   |   |   |   |   |   |   |   |   |   |   |   |   |   |   |   |   |   |   |   |   |   |   |   |   |   |   |   |   |   |   |   |   |   |   |   |   |   |   |   |   |   |   |   |   |   |   |   |   |   |   |   |   |   |   |   |   |   |   |   |   |   |   |   |   |   |   |   |   |   |   |   |   |   |   |   |   |   |   |   |   |   |   |   |   |   |   |   |   |   |   |   |   |   |   |   |   |   |   |   |   |   |   |   |   |   |   |   |   |   |   |   |   |   |   |   |   |   |   |   |   |   |   |   |   |   |   |   |   |   |   |   |   |   |   |   |   |   |   |   |   |   |   |   |   |   |   |   |   |   |   |   |   |   |   |   |   |   |   |   |   |   |   |   |   |   |   |   |   |   |   |   |   |   |   |   |   |   |   |   |   |   |   |   |   |   |   |   |   |   |   |   |   |   |   |   |   |   |   |   |   |   |   |   |   |   |   |   |   |   |   |   |   |   |   |   |   |   |   |   |   |   |   |   |   |   |   |   |   |   |   |   |   |   |   |   |   |   |   |   |   |   |   |   |   |   |   |   |   |   |   |   |   |   |   |   |   |   |   |   |   |   |   |   |   |   |   |   |   |   |   |   |   |   |   |   |   |   |   |   |   |   |   |   |   |   |   |   |   |   |   |   |   |   |   |   |   |   |   |   |   |   |   |   |   |   |   |   |   |   |   |   |   |   |   |   |   |   |   |   |   |   |   |   |   |   |   |   |   |   |   |   |   |   |   |   |   |   |   |   |   |   |   |   |   |   |   |   |   |   |   |   |   |   |   |   |   |   |   |   |   |   |   |   |   |   |   |   |   |   |   |   |   |   |   |   |   |   |   |   |   |   |   |   |   |   |   |   |   |   |   |   |   |   |   |   |   |   |   |   |   |   |   |   |   |   |   |   |   |   |   |   |   |   |   |   |   |   |   |   |   |   |   |   |   |   |   |   |   |   |   |   |   |   |   |   |   |   |   |   |   |   |   |   |   |   |   |   |   |   |   |   |   |   |   |   |   |   |   |   |   |   |   |   |   |   |   |   |   |   |   |   |   |   |   |   |   |   |   |   |   |   |   |   |   |   |   |   |   |   |   |   |   |   |   |   |   |   |   |   |   |   |   |   |   |   |   |   |   |   |   |   |   |   |   |   |   |   |   |   |   |   |   |   |   |   |   |   |   |   |   |   |   |   |   |   |   |   |   |   |   |   |   |   |   |   |   |   |   |   |   |   |   |   |   |   |   |   |   |   |   |   |   |   |   |   |   |   |   |   |   |   |   |   |   |
|--------------------------------|--------|---------|----------|--------|-------|-------|----------|--------|-------|----------|-------------|----------|-------|-----------|-----|-------|-------------------|-----|------|--------|---------------|-------|-----|----|------------|----|-------|-----|--------|-------|---|------|-----|---|---|---|---|-------|---|---|----|---|---|---|---|-----|---|---|---|---|---|---|---|---|---|---|---|---|---|---|------|---|---|---|---|---|---|---|---|---|---|---|---|---|---|---|---|---|---|---|---|---|---|---|---|---|---|---|---|---|---|---|---|---|---|---|---|---|---|---|---|---|---|---|---|---|---|---|---|---|---|---|---|---|---|---|---|---|---|---|---|---|---|---|---|---|---|---|---|---|---|---|---|---|---|---|---|---|---|---|---|---|---|---|---|---|---|---|---|---|---|---|---|---|---|---|---|---|---|---|---|---|---|---|---|---|---|---|---|---|---|---|---|---|---|---|---|---|---|---|---|---|---|---|---|---|---|---|---|---|---|---|---|---|---|---|---|---|---|---|---|---|---|---|---|---|---|---|---|---|---|---|---|---|---|---|---|---|---|---|---|---|---|---|---|---|---|---|---|---|---|---|---|---|---|---|---|---|---|---|---|---|---|---|---|---|---|---|---|---|---|---|---|---|---|---|---|---|---|---|---|---|---|---|---|---|---|---|---|---|---|---|---|---|---|---|---|---|---|---|---|---|---|---|---|---|---|---|---|---|---|---|---|---|---|---|---|---|---|---|---|---|---|---|---|---|---|---|---|---|---|---|---|---|---|---|---|---|---|---|---|---|---|---|---|---|---|---|---|---|---|---|---|---|---|---|---|---|---|---|---|---|---|---|---|---|---|---|---|---|---|---|---|---|---|---|---|---|---|---|---|---|---|---|---|---|---|---|---|---|---|---|---|---|---|---|---|---|---|---|---|---|---|---|---|---|---|---|---|---|---|---|---|---|---|---|---|---|---|---|---|---|---|---|---|---|---|---|---|---|---|---|---|---|---|---|---|---|---|---|---|---|---|---|---|---|---|---|---|---|---|---|---|---|---|---|---|---|---|---|---|---|---|---|---|---|---|---|---|---|---|---|---|---|---|---|---|---|---|---|---|---|---|---|---|---|---|---|---|---|---|---|---|---|---|---|---|---|---|---|---|---|---|---|---|---|---|---|---|---|---|---|---|---|---|---|---|---|---|---|---|---|---|---|---|---|---|---|---|---|---|---|---|---|---|---|---|---|---|---|---|---|---|---|---|---|---|---|---|---|---|---|---|---|---|---|---|---|---|---|---|---|---|---|---|---|---|---|---|---|---|---|---|---|---|---|---|---|---|---|---|---|---|---|---|---|---|---|---|---|---|---|---|---|---|---|---|---|---|---|---|---|---|---|---|---|---|---|---|---|---|---|---|---|---|---|---|---|---|---|---|---|---|---|---|---|---|---|---|---|---|---|---|---|---|---|---|---|---|---|---|---|---|---|---|---|---|---|---|---|---|---|---|---|---|---|---|---|---|---|---|---|---|---|---|---|---|---|---|---|---|---|---|---|---|---|---|---|---|---|---|---|---|---|---|---|---|---|---|---|---|---|---|---|---|---|---|---|---|---|---|---|---|---|---|---|---|---|---|---|---|---|---|---|---|---|---|---|---|---|---|---|---|---|---|---|---|---|---|---|---|---|---|---|---|---|---|---|---|---|---|---|---|---|---|---|---|---|---|---|---|---|---|---|---|---|---|---|---|---|---|---|---|---|---|---|---|---|---|---|---|---|---|---|---|---|---|---|---|---|---|---|---|---|---|---|---|---|---|---|---|---|---|---|---|---|---|---|---|---|---|---|---|---|---|---|---|---|---|---|---|---|---|---|---|---|---|---|---|---|---|---|---|---|---|---|---|---|---|---|---|---|---|---|---|---|---|---|---|---|---|---|---|---|---|---|---|---|---|---|---|---|---|---|---|---|---|---|---|---|---|---|---|---|---|---|---|---|---|---|---|---|---|---|---|---|---|---|---|---|---|---|---|---|---|---|---|---|---|---|---|---|---|---|---|---|---|---|---|---|---|---|---|---|---|---|---|---|---|---|---|---|---|---|---|---|---|---|---|---|---|---|---|---|---|---|---|---|---|---|---|---|---|---|---|---|---|---|---|---|---|---|---|---|---|---|---|---|---|---|---|---|
|                                |        |         |          |        |       |       |          |        |       |          | Section 358 |          |       |           |     |       |                   |     |      |        |               |       |     |    |            |    |       |     |        |       |   |      |     |   |   |   |   |       |   |   |    |   |   |   |   |     |   |   |   |   |   |   |   |   |   |   |   |   |   |   |      |   |   |   |   |   |   |   |   |   |   |   |   |   |   |   |   |   |   |   |   |   |   |   |   |   |   |   |   |   |   |   |   |   |   |   |   |   |   |   |   |   |   |   |   |   |   |   |   |   |   |   |   |   |   |   |   |   |   |   |   |   |   |   |   |   |   |   |   |   |   |   |   |   |   |   |   |   |   |   |   |   |   |   |   |   |   |   |   |   |   |   |   |   |   |   |   |   |   |   |   |   |   |   |   |   |   |   |   |   |   |   |   |   |   |   |   |   |   |   |   |   |   |   |   |   |   |   |   |   |   |   |   |   |   |   |   |   |   |   |   |   |   |   |   |   |   |   |   |   |   |   |   |   |   |   |   |   |   |   |   |   |   |   |   |   |   |   |   |   |   |   |   |   |   |   |   |   |   |   |   |   |   |   |   |   |   |   |   |   |   |   |   |   |   |   |   |   |   |   |   |   |   |   |   |   |   |   |   |   |   |   |   |   |   |   |   |   |   |   |   |   |   |   |   |   |   |   |   |   |   |   |   |   |   |   |   |   |   |   |   |   |   |   |   |   |   |   |   |   |   |   |   |   |   |   |   |   |   |   |   |   |   |   |   |   |   |   |   |   |   |   |   |   |   |   |   |   |   |   |   |   |   |   |   |   |   |   |   |   |   |   |   |   |   |   |   |   |   |   |   |   |   |   |   |   |   |   |   |   |   |   |   |   |   |   |   |   |   |   |   |   |   |   |   |   |   |   |   |   |   |   |   |   |   |   |   |   |   |   |   |   |   |   |   |   |   |   |   |   |   |   |   |   |   |   |   |   |   |   |   |   |   |   |   |   |   |   |   |   |   |   |   |   |   |   |   |   |   |   |   |   |   |   |   |   |   |   |   |   |   |   |   |   |   |   |   |   |   |   |   |   |   |   |   |   |   |   |   |   |   |   |   |   |   |   |   |   |   |   |   |   |   |   |   |   |   |   |   |   |   |   |   |   |   |   |   |   |   |   |   |   |   |   |   |   |   |   |   |   |   |   |   |   |   |   |   |   |   |   |   |   |   |   |   |   |   |   |   |   |   |   |   |   |   |   |   |   |   |   |   |   |   |   |   |   |   |   |   |   |   |   |   |   |   |   |   |   |   |   |   |   |   |   |   |   |   |   |   |   |   |   |   |   |   |   |   |   |   |   |   |   |   |   |   |   |   |   |   |   |   |   |   |   |   |   |   |   |   |   |   |   |   |   |   |   |   |   |   |   |   |   |   |   |   |   |   |   |   |   |   |   |   |   |   |   |   |   |   |   |   |   |   |   |   |   |   |   |   |   |   |   |   |   |   |   |   |   |   |   |   |   |   |   |   |   |   |   |   |   |   |   |   |   |   |   |   |   |   |   |   |   |   |   |   |   |   |   |   |   |   |   |   |   |   |   |   |   |   |   |   |   |   |   |   |   |   |   |   |   |   |   |   |   |   |   |   |   |   |   |   |   |   |   |   |   |   |   |   |   |   |   |   |   |   |   |   |   |   |   |   |   |   |   |   |   |   |   |   |   |   |   |   |   |   |   |   |   |   |   |   |   |   |   |   |   |   |   |   |   |   |   |   |   |   |   |   |   |   |   |   |   |   |   |   |   |   |   |   |   |   |   |   |   |   |   |   |   |   |   |   |   |   |   |   |   |   |   |   |   |   |   |   |   |   |   |   |   |   |   |   |   |   |   |   |   |   |   |   |   |   |   |   |   |   |   |   |   |   |   |   |   |   |   |   |   |   |   |   |   |   |   |   |   |   |   |   |   |   |   |   |   |   |   |   |   |   |   |   |   |   |   |   |   |   |   |   |   |   |   |   |   |   |   |   |   |   |   |   |   |   |   |   |   |   |   |   |   |   |   |   |   |   |   |   |   |   |   |   |   |   |   |   |   |   |   |   |   |   |   |   |   |   |   |   |   |   |   |   |   |   |   |   |   |   |   |   |   |   |   |   |   |
| (34630)                        | 34630  | 34640   | 34650    | 34660  | 34670 | 34680 | 34690    | 34700  | 34710 | 34726    |             |          |       |           |     |       |                   |     |      |        |               |       |     |    |            |    |       |     |        |       |   |      |     |   |   |   |   |       |   |   |    |   |   |   |   |     |   |   |   |   |   |   |   |   |   |   |   |   |   |   |      |   |   |   |   |   |   |   |   |   |   |   |   |   |   |   |   |   |   |   |   |   |   |   |   |   |   |   |   |   |   |   |   |   |   |   |   |   |   |   |   |   |   |   |   |   |   |   |   |   |   |   |   |   |   |   |   |   |   |   |   |   |   |   |   |   |   |   |   |   |   |   |   |   |   |   |   |   |   |   |   |   |   |   |   |   |   |   |   |   |   |   |   |   |   |   |   |   |   |   |   |   |   |   |   |   |   |   |   |   |   |   |   |   |   |   |   |   |   |   |   |   |   |   |   |   |   |   |   |   |   |   |   |   |   |   |   |   |   |   |   |   |   |   |   |   |   |   |   |   |   |   |   |   |   |   |   |   |   |   |   |   |   |   |   |   |   |   |   |   |   |   |   |   |   |   |   |   |   |   |   |   |   |   |   |   |   |   |   |   |   |   |   |   |   |   |   |   |   |   |   |   |   |   |   |   |   |   |   |   |   |   |   |   |   |   |   |   |   |   |   |   |   |   |   |   |   |   |   |   |   |   |   |   |   |   |   |   |   |   |   |   |   |   |   |   |   |   |   |   |   |   |   |   |   |   |   |   |   |   |   |   |   |   |   |   |   |   |   |   |   |   |   |   |   |   |   |   |   |   |   |   |   |   |   |   |   |   |   |   |   |   |   |   |   |   |   |   |   |   |   |   |   |   |   |   |   |   |   |   |   |   |   |   |   |   |   |   |   |   |   |   |   |   |   |   |   |   |   |   |   |   |   |   |   |   |   |   |   |   |   |   |   |   |   |   |   |   |   |   |   |   |   |   |   |   |   |   |   |   |   |   |   |   |   |   |   |   |   |   |   |   |   |   |   |   |   |   |   |   |   |   |   |   |   |   |   |   |   |   |   |   |   |   |   |   |   |   |   |   |   |   |   |   |   |   |   |   |   |   |   |   |   |   |   |   |   |   |   |   |   |   |   |   |   |   |   |   |   |   |   |   |   |   |   |   |   |   |   |   |   |   |   |   |   |   |   |   |   |   |   |   |   |   |   |   |   |   |   |   |   |   |   |   |   |   |   |   |   |   |   |   |   |   |   |   |   |   |   |   |   |   |   |   |   |   |   |   |   |   |   |   |   |   |   |   |   |   |   |   |   |   |   |   |   |   |   |   |   |   |   |   |   |   |   |   |   |   |   |   |   |   |   |   |   |   |   |   |   |   |   |   |   |   |   |   |   |   |   |   |   |   |   |   |   |   |   |   |   |   |   |   |   |   |   |   |   |   |   |   |   |   |   |   |   |   |   |   |   |   |   |   |   |   |   |   |   |   |   |   |   |   |   |   |   |   |   |   |   |   |   |   |   |   |   |   |   |   |   |   |   |   |   |   |   |   |   |   |   |   |   |   |   |   |   |   |   |   |   |   |   |   |   |   |   |   |   |   |   |   |   |   |   |   |   |   |   |   |   |   |   |   |   |   |   |   |   |   |   |   |   |   |   |   |   |   |   |   |   |   |   |   |   |   |   |   |   |   |   |   |   |   |   |   |   |   |   |   |   |   |   |   |   |   |   |   |   |   |   |   |   |   |   |   |   |   |   |   |   |   |   |   |   |   |   |   |   |   |   |   |   |   |   |   |   |   |   |   |   |   |   |   |   |   |   |   |   |   |   |   |   |   |   |   |   |   |   |   |   |   |   |   |   |   |   |   |   |   |   |   |   |   |   |   |   |   |   |   |   |   |   |   |   |   |   |   |   |   |   |   |   |   |   |   |   |   |   |   |   |   |   |   |   |   |   |   |   |   |   |   |   |   |   |   |   |   |   |   |   |   |   |   |   |   |   |   |   |   |   |   |   |   |   |   |   |   |   |   |   |   |   |   |   |   |   |   |   |   |   |   |   |   |   |   |   |   |   |   |   |   |   |   |   |   |   |   |   |   |   |   |   |   |   |   |   |   |   |   |   |   |   |   |   |   |   |   |   |   |   |   |   |   |
| Ad 12 X73487 (32347)           | AAAAAA | C       | AAAAC    | CACG   | TAC   | GAC   | C        | CAC--- | T     | GGTTATCG | CAC         | CT       | CG    | TCCTTTT-- | TGT | TG    | CAGCGTTGGCGTTCCGT | C   | AAA  | AA     | AGCAAAGTACAA  | C     | CA  |    |            |    |       |     |        |       |   |      |     |   |   |   |   |       |   |   |    |   |   |   |   |     |   |   |   |   |   |   |   |   |   |   |   |   |   |   |      |   |   |   |   |   |   |   |   |   |   |   |   |   |   |   |   |   |   |   |   |   |   |   |   |   |   |   |   |   |   |   |   |   |   |   |   |   |   |   |   |   |   |   |   |   |   |   |   |   |   |   |   |   |   |   |   |   |   |   |   |   |   |   |   |   |   |   |   |   |   |   |   |   |   |   |   |   |   |   |   |   |   |   |   |   |   |   |   |   |   |   |   |   |   |   |   |   |   |   |   |   |   |   |   |   |   |   |   |   |   |   |   |   |   |   |   |   |   |   |   |   |   |   |   |   |   |   |   |   |   |   |   |   |   |   |   |   |   |   |   |   |   |   |   |   |   |   |   |   |   |   |   |   |   |   |   |   |   |   |   |   |   |   |   |   |   |   |   |   |   |   |   |   |   |   |   |   |   |   |   |   |   |   |   |   |   |   |   |   |   |   |   |   |   |   |   |   |   |   |   |   |   |   |   |   |   |   |   |   |   |   |   |   |   |   |   |   |   |   |   |   |   |   |   |   |   |   |   |   |   |   |   |   |   |   |   |   |   |   |   |   |   |   |   |   |   |   |   |   |   |   |   |   |   |   |   |   |   |   |   |   |   |   |   |   |   |   |   |   |   |   |   |   |   |   |   |   |   |   |   |   |   |   |   |   |   |   |   |   |   |   |   |   |   |   |   |   |   |   |   |   |   |   |   |   |   |   |   |   |   |   |   |   |   |   |   |   |   |   |   |   |   |   |   |   |   |   |   |   |   |   |   |   |   |   |   |   |   |   |   |   |   |   |   |   |   |   |   |   |   |   |   |   |   |   |   |   |   |   |   |   |   |   |   |   |   |   |   |   |   |   |   |   |   |   |   |   |   |   |   |   |   |   |   |   |   |   |   |   |   |   |   |   |   |   |   |   |   |   |   |   |   |   |   |   |   |   |   |   |   |   |   |   |   |   |   |   |   |   |   |   |   |   |   |   |   |   |   |   |   |   |   |   |   |   |   |   |   |   |   |   |   |   |   |   |   |   |   |   |   |   |   |   |   |   |   |   |   |   |   |   |   |   |   |   |   |   |   |   |   |   |   |   |   |   |   |   |   |   |   |   |   |   |   |   |   |   |   |   |   |   |   |   |   |   |   |   |   |   |   |   |   |   |   |   |   |   |   |   |   |   |   |   |   |   |   |   |   |   |   |   |   |   |   |   |   |   |   |   |   |   |   |   |   |   |   |   |   |   |   |   |   |   |   |   |   |   |   |   |   |   |   |   |   |   |   |   |   |   |   |   |   |   |   |   |   |   |   |   |   |   |   |   |   |   |   |   |   |   |   |   |   |   |   |   |   |   |   |   |   |   |   |   |   |   |   |   |   |   |   |   |   |   |   |   |   |   |   |   |   |   |   |   |   |   |   |   |   |   |   |   |   |   |   |   |   |   |   |   |   |   |   |   |   |   |   |   |   |   |   |   |   |   |   |   |   |   |   |   |   |   |   |   |   |   |   |   |   |   |   |   |   |   |   |   |   |   |   |   |   |   |   |   |   |   |   |   |   |   |   |   |   |   |   |   |   |   |   |   |   |   |   |   |   |   |   |   |   |   |   |   |   |   |   |   |   |   |   |   |   |   |   |   |   |   |   |   |   |   |   |   |   |   |   |   |   |   |   |   |   |   |   |   |   |   |   |   |   |   |   |   |   |   |   |   |   |   |   |   |   |   |   |   |   |   |   |   |   |   |   |   |   |   |   |   |   |   |   |   |   |   |   |   |   |   |   |   |   |   |   |   |   |   |   |   |   |   |   |   |   |   |   |   |   |   |   |   |   |   |   |   |   |   |   |   |   |   |   |   |   |   |   |   |   |   |   |   |   |   |   |   |   |   |   |   |   |   |   |   |   |   |   |   |   |   |   |   |   |   |   |   |   |   |   |   |   |   |   |   |   |   |   |   |   |   |   |   |   |   |   |   |   |   |   |   |   |   |   |   |   |   |
| SARS-CoV-2 NC_045512.2 (28923) | CTGCT- | C       | TTGCTTTG | C      | TG    | CTT   | -GACA    | G      | ATT   | GAAC     | C           | A        | G     | CT        | TG  | A     | GAGCAAAA          | TGT | C    | TG     | TAAAGGCC----- | AA    | C   | AA | CAAGG----- | C  | CA    |     |        |       |   |      |     |   |   |   |   |       |   |   |    |   |   |   |   |     |   |   |   |   |   |   |   |   |   |   |   |   |   |   |      |   |   |   |   |   |   |   |   |   |   |   |   |   |   |   |   |   |   |   |   |   |   |   |   |   |   |   |   |   |   |   |   |   |   |   |   |   |   |   |   |   |   |   |   |   |   |   |   |   |   |   |   |   |   |   |   |   |   |   |   |   |   |   |   |   |   |   |   |   |   |   |   |   |   |   |   |   |   |   |   |   |   |   |   |   |   |   |   |   |   |   |   |   |   |   |   |   |   |   |   |   |   |   |   |   |   |   |   |   |   |   |   |   |   |   |   |   |   |   |   |   |   |   |   |   |   |   |   |   |   |   |   |   |   |   |   |   |   |   |   |   |   |   |   |   |   |   |   |   |   |   |   |   |   |   |   |   |   |   |   |   |   |   |   |   |   |   |   |   |   |   |   |   |   |   |   |   |   |   |   |   |   |   |   |   |   |   |   |   |   |   |   |   |   |   |   |   |   |   |   |   |   |   |   |   |   |   |   |   |   |   |   |   |   |   |   |   |   |   |   |   |   |   |   |   |   |   |   |   |   |   |   |   |   |   |   |   |   |   |   |   |   |   |   |   |   |   |   |   |   |   |   |   |   |   |   |   |   |   |   |   |   |   |   |   |   |   |   |   |   |   |   |   |   |   |   |   |   |   |   |   |   |   |   |   |   |   |   |   |   |   |   |   |   |   |   |   |   |   |   |   |   |   |   |   |   |   |   |   |   |   |   |   |   |   |   |   |   |   |   |   |   |   |   |   |   |   |   |   |   |   |   |   |   |   |   |   |   |   |   |   |   |   |   |   |   |   |   |   |   |   |   |   |   |   |   |   |   |   |   |   |   |   |   |   |   |   |   |   |   |   |   |   |   |   |   |   |   |   |   |   |   |   |   |   |   |   |   |   |   |   |   |   |   |   |   |   |   |   |   |   |   |   |   |   |   |   |   |   |   |   |   |   |   |   |   |   |   |   |   |   |   |   |   |   |   |   |   |   |   |   |   |   |   |   |   |   |   |   |   |   |   |   |   |   |   |   |   |   |   |   |   |   |   |   |   |   |   |   |   |   |   |   |   |   |   |   |   |   |   |   |   |   |   |   |   |   |   |   |   |   |   |   |   |   |   |   |   |   |   |   |   |   |   |   |   |   |   |   |   |   |   |   |   |   |   |   |   |   |   |   |   |   |   |   |   |   |   |   |   |   |   |   |   |   |   |   |   |   |   |   |   |   |   |   |   |   |   |   |   |   |   |   |   |   |   |   |   |   |   |   |   |   |   |   |   |   |   |   |   |   |   |   |   |   |   |   |   |   |   |   |   |   |   |   |   |   |   |   |   |   |   |   |   |   |   |   |   |   |   |   |   |   |   |   |   |   |   |   |   |   |   |   |   |   |   |   |   |   |   |   |   |   |   |   |   |   |   |   |   |   |   |   |   |   |   |   |   |   |   |   |   |   |   |   |   |   |   |   |   |   |   |   |   |   |   |   |   |   |   |   |   |   |   |   |   |   |   |   |   |   |   |   |   |   |   |   |   |   |   |   |   |   |   |   |   |   |   |   |   |   |   |   |   |   |   |   |   |   |   |   |   |   |   |   |   |   |   |   |   |   |   |   |   |   |   |   |   |   |   |   |   |   |   |   |   |   |   |   |   |   |   |   |   |   |   |   |   |   |   |   |   |   |   |   |   |   |   |   |   |   |   |   |   |   |   |   |   |   |   |   |   |   |   |   |   |   |   |   |   |   |   |   |   |   |   |   |   |   |   |   |   |   |   |   |   |   |   |   |   |   |   |   |   |   |   |   |   |   |   |   |   |   |   |   |   |   |   |   |   |   |   |   |   |   |   |   |   |   |   |   |   |   |   |   |   |   |   |   |   |   |   |   |   |   |   |   |   |   |   |   |   |   |   |   |   |   |   |   |   |   |   |   |   |   |   |   |   |   |   |   |   |   |   |   |   |   |   |   |   |   |   |   |   |   |   |   |   |   |   |   |
|                                |        |         |          |        |       |       |          |        |       |          | Section 359 |          |       |           |     |       |                   |     |      |        |               |       |     |    |            |    |       |     |        |       |   |      |     |   |   |   |   |       |   |   |    |   |   |   |   |     |   |   |   |   |   |   |   |   |   |   |   |   |   |   |      |   |   |   |   |   |   |   |   |   |   |   |   |   |   |   |   |   |   |   |   |   |   |   |   |   |   |   |   |   |   |   |   |   |   |   |   |   |   |   |   |   |   |   |   |   |   |   |   |   |   |   |   |   |   |   |   |   |   |   |   |   |   |   |   |   |   |   |   |   |   |   |   |   |   |   |   |   |   |   |   |   |   |   |   |   |   |   |   |   |   |   |   |   |   |   |   |   |   |   |   |   |   |   |   |   |   |   |   |   |   |   |   |   |   |   |   |   |   |   |   |   |   |   |   |   |   |   |   |   |   |   |   |   |   |   |   |   |   |   |   |   |   |   |   |   |   |   |   |   |   |   |   |   |   |   |   |   |   |   |   |   |   |   |   |   |   |   |   |   |   |   |   |   |   |   |   |   |   |   |   |   |   |   |   |   |   |   |   |   |   |   |   |   |   |   |   |   |   |   |   |   |   |   |   |   |   |   |   |   |   |   |   |   |   |   |   |   |   |   |   |   |   |   |   |   |   |   |   |   |   |   |   |   |   |   |   |   |   |   |   |   |   |   |   |   |   |   |   |   |   |   |   |   |   |   |   |   |   |   |   |   |   |   |   |   |   |   |   |   |   |   |   |   |   |   |   |   |   |   |   |   |   |   |   |   |   |   |   |   |   |   |   |   |   |   |   |   |   |   |   |   |   |   |   |   |   |   |   |   |   |   |   |   |   |   |   |   |   |   |   |   |   |   |   |   |   |   |   |   |   |   |   |   |   |   |   |   |   |   |   |   |   |   |   |   |   |   |   |   |   |   |   |   |   |   |   |   |   |   |   |   |   |   |   |   |   |   |   |   |   |   |   |   |   |   |   |   |   |   |   |   |   |   |   |   |   |   |   |   |   |   |   |   |   |   |   |   |   |   |   |   |   |   |   |   |   |   |   |   |   |   |   |   |   |   |   |   |   |   |   |   |   |   |   |   |   |   |   |   |   |   |   |   |   |   |   |   |   |   |   |   |   |   |   |   |   |   |   |   |   |   |   |   |   |   |   |   |   |   |   |   |   |   |   |   |   |   |   |   |   |   |   |   |   |   |   |   |   |   |   |   |   |   |   |   |   |   |   |   |   |   |   |   |   |   |   |   |   |   |   |   |   |   |   |   |   |   |   |   |   |   |   |   |   |   |   |   |   |   |   |   |   |   |   |   |   |   |   |   |   |   |   |   |   |   |   |   |   |   |   |   |   |   |   |   |   |   |   |   |   |   |   |   |   |   |   |   |   |   |   |   |   |   |   |   |   |   |   |   |   |   |   |   |   |   |   |   |   |   |   |   |   |   |   |   |   |   |   |   |   |   |   |   |   |   |   |   |   |   |   |   |   |   |   |   |   |   |   |   |   |   |   |   |   |   |   |   |   |   |   |   |   |   |   |   |   |   |   |   |   |   |   |   |   |   |   |   |   |   |   |   |   |   |   |   |   |   |   |   |   |   |   |   |   |   |   |   |   |   |   |   |   |   |   |   |   |   |   |   |   |   |   |   |   |   |   |   |   |   |   |   |   |   |   |   |   |   |   |   |   |   |   |   |   |   |   |   |   |   |   |   |   |   |   |   |   |   |   |   |   |   |   |   |   |   |   |   |   |   |   |   |   |   |   |   |   |   |   |   |   |   |   |   |   |   |   |   |   |   |   |   |   |   |   |   |   |   |   |   |   |   |   |   |   |   |   |   |   |   |   |   |   |   |   |   |   |   |   |   |   |   |   |   |   |   |   |   |   |   |   |   |   |   |   |   |   |   |   |   |   |   |   |   |   |   |   |   |   |   |   |   |   |   |   |   |   |   |   |   |   |   |   |   |   |   |   |   |   |   |   |   |   |   |   |   |   |   |   |   |   |   |   |   |   |   |   |   |   |   |   |   |   |   |   |   |   |   |   |   |   |   |   |   |   |   |   |   |   |   |   |   |   |   |   |   |   |   |   |   |   |   |
| (34727)                        | 34727  | 34740   | 34750    | 34760  | 34770 | 34780 | 34790    | 34800  | 34810 | 34823    |             |          |       |           |     |       |                   |     |      |        |               |       |     |    |            |    |       |     |        |       |   |      |     |   |   |   |   |       |   |   |    |   |   |   |   |     |   |   |   |   |   |   |   |   |   |   |   |   |   |   |      |   |   |   |   |   |   |   |   |   |   |   |   |   |   |   |   |   |   |   |   |   |   |   |   |   |   |   |   |   |   |   |   |   |   |   |   |   |   |   |   |   |   |   |   |   |   |   |   |   |   |   |   |   |   |   |   |   |   |   |   |   |   |   |   |   |   |   |   |   |   |   |   |   |   |   |   |   |   |   |   |   |   |   |   |   |   |   |   |   |   |   |   |   |   |   |   |   |   |   |   |   |   |   |   |   |   |   |   |   |   |   |   |   |   |   |   |   |   |   |   |   |   |   |   |   |   |   |   |   |   |   |   |   |   |   |   |   |   |   |   |   |   |   |   |   |   |   |   |   |   |   |   |   |   |   |   |   |   |   |   |   |   |   |   |   |   |   |   |   |   |   |   |   |   |   |   |   |   |   |   |   |   |   |   |   |   |   |   |   |   |   |   |   |   |   |   |   |   |   |   |   |   |   |   |   |   |   |   |   |   |   |   |   |   |   |   |   |   |   |   |   |   |   |   |   |   |   |   |   |   |   |   |   |   |   |   |   |   |   |   |   |   |   |   |   |   |   |   |   |   |   |   |   |   |   |   |   |   |   |   |   |   |   |   |   |   |   |   |   |   |   |   |   |   |   |   |   |   |   |   |   |   |   |   |   |   |   |   |   |   |   |   |   |   |   |   |   |   |   |   |   |   |   |   |   |   |   |   |   |   |   |   |   |   |   |   |   |   |   |   |   |   |   |   |   |   |   |   |   |   |   |   |   |   |   |   |   |   |   |   |   |   |   |   |   |   |   |   |   |   |   |   |   |   |   |   |   |   |   |   |   |   |   |   |   |   |   |   |   |   |   |   |   |   |   |   |   |   |   |   |   |   |   |   |   |   |   |   |   |   |   |   |   |   |   |   |   |   |   |   |   |   |   |   |   |   |   |   |   |   |   |   |   |   |   |   |   |   |   |   |   |   |   |   |   |   |   |   |   |   |   |   |   |   |   |   |   |   |   |   |   |   |   |   |   |   |   |   |   |   |   |   |   |   |   |   |   |   |   |   |   |   |   |   |   |   |   |   |   |   |   |   |   |   |   |   |   |   |   |   |   |   |   |   |   |   |   |   |   |   |   |   |   |   |   |   |   |   |   |   |   |   |   |   |   |   |   |   |   |   |   |   |   |   |   |   |   |   |   |   |   |   |   |   |   |   |   |   |   |   |   |   |   |   |   |   |   |   |   |   |   |   |   |   |   |   |   |   |   |   |   |   |   |   |   |   |   |   |   |   |   |   |   |   |   |   |   |   |   |   |   |   |   |   |   |   |   |   |   |   |   |   |   |   |   |   |   |   |   |   |   |   |   |   |   |   |   |   |   |   |   |   |   |   |   |   |   |   |   |   |   |   |   |   |   |   |   |   |   |   |   |   |   |   |   |   |   |   |   |   |   |   |   |   |   |   |   |   |   |   |   |   |   |   |   |   |   |   |   |   |   |   |   |   |   |   |   |   |   |   |   |   |   |   |   |   |   |   |   |   |   |   |   |   |   |   |   |   |   |   |   |   |   |   |   |   |   |   |   |   |   |   |   |   |   |   |   |   |   |   |   |   |   |   |   |   |   |   |   |   |   |   |   |   |   |   |   |   |   |   |   |   |   |   |   |   |   |   |   |   |   |   |   |   |   |   |   |   |   |   |   |   |   |   |   |   |   |   |   |   |   |   |   |   |   |   |   |   |   |   |   |   |   |   |   |   |   |   |   |   |   |   |   |   |   |   |   |   |   |   |   |   |   |   |   |   |   |   |   |   |   |   |   |   |   |   |   |   |   |   |   |   |   |   |   |   |   |   |   |   |   |   |   |   |   |   |   |   |   |   |   |   |   |   |   |   |   |   |   |   |   |   |   |   |   |   |   |   |   |   |   |   |   |   |   |   |   |   |   |   |   |   |   |   |   |   |   |   |   |   |   |   |   |   |   |   |   |   |   |   |   |
| Ad 12 X73487 (32439)           | CT     | CTCG    | CAGG     | CTTGCT | AAAA  | TG    | TAT--TCA | GCTTC  | -AG   | GTGTTA   | TC          | -TTC     | AAA   | T         | CAT | GATG  | T                 | TTT | AA   | TAAAGC | --GC          | AGAGT | ATC | C  | A          | C  | AGGAT | G   | C      |       |   |      |     |   |   |   |   |       |   |   |    |   |   |   |   |     |   |   |   |   |   |   |   |   |   |   |   |   |   |   |      |   |   |   |   |   |   |   |   |   |   |   |   |   |   |   |   |   |   |   |   |   |   |   |   |   |   |   |   |   |   |   |   |   |   |   |   |   |   |   |   |   |   |   |   |   |   |   |   |   |   |   |   |   |   |   |   |   |   |   |   |   |   |   |   |   |   |   |   |   |   |   |   |   |   |   |   |   |   |   |   |   |   |   |   |   |   |   |   |   |   |   |   |   |   |   |   |   |   |   |   |   |   |   |   |   |   |   |   |   |   |   |   |   |   |   |   |   |   |   |   |   |   |   |   |   |   |   |   |   |   |   |   |   |   |   |   |   |   |   |   |   |   |   |   |   |   |   |   |   |   |   |   |   |   |   |   |   |   |   |   |   |   |   |   |   |   |   |   |   |   |   |   |   |   |   |   |   |   |   |   |   |   |   |   |   |   |   |   |   |   |   |   |   |   |   |   |   |   |   |   |   |   |   |   |   |   |   |   |   |   |   |   |   |   |   |   |   |   |   |   |   |   |   |   |   |   |   |   |   |   |   |   |   |   |   |   |   |   |   |   |   |   |   |   |   |   |   |   |   |   |   |   |   |   |   |   |   |   |   |   |   |   |   |   |   |   |   |   |   |   |   |   |   |   |   |   |   |   |   |   |   |   |   |   |   |   |   |   |   |   |   |   |   |   |   |   |   |   |   |   |   |   |   |   |   |   |   |   |   |   |   |   |   |   |   |   |   |   |   |   |   |   |   |   |   |   |   |   |   |   |   |   |   |   |   |   |   |   |   |   |   |   |   |   |   |   |   |   |   |   |   |   |   |   |   |   |   |   |   |   |   |   |   |   |   |   |   |   |   |   |   |   |   |   |   |   |   |   |   |   |   |   |   |   |   |   |   |   |   |   |   |   |   |   |   |   |   |   |   |   |   |   |   |   |   |   |   |   |   |   |   |   |   |   |   |   |   |   |   |   |   |   |   |   |   |   |   |   |   |   |   |   |   |   |   |   |   |   |   |   |   |   |   |   |   |   |   |   |   |   |   |   |   |   |   |   |   |   |   |   |   |   |   |   |   |   |   |   |   |   |   |   |   |   |   |   |   |   |   |   |   |   |   |   |   |   |   |   |   |   |   |   |   |   |   |   |   |   |   |   |   |   |   |   |   |   |   |   |   |   |   |   |   |   |   |   |   |   |   |   |   |   |   |   |   |   |   |   |   |   |   |   |   |   |   |   |   |   |   |   |   |   |   |   |   |   |   |   |   |   |   |   |   |   |   |   |   |   |   |   |   |   |   |   |   |   |   |   |   |   |   |   |   |   |   |   |   |   |   |   |   |   |   |   |   |   |   |   |   |   |   |   |   |   |   |   |   |   |   |   |   |   |   |   |   |   |   |   |   |   |   |   |   |   |   |   |   |   |   |   |   |   |   |   |   |   |   |   |   |   |   |   |   |   |   |   |   |   |   |   |   |   |   |   |   |   |   |   |   |   |   |   |   |   |   |   |   |   |   |   |   |   |   |   |   |   |   |   |   |   |   |   |   |   |   |   |   |   |   |   |   |   |   |   |   |   |   |   |   |   |   |   |   |   |   |   |   |   |   |   |   |   |   |   |   |   |   |   |   |   |   |   |   |   |   |   |   |   |   |   |   |   |   |   |   |   |   |   |   |   |   |   |   |   |   |   |   |   |   |   |   |   |   |   |   |   |   |   |   |   |   |   |   |   |   |   |   |   |   |   |   |   |   |   |   |   |   |   |   |   |   |   |   |   |   |   |   |   |   |   |   |   |   |   |   |   |   |   |   |   |   |   |   |   |   |   |   |   |   |   |   |   |   |   |   |   |   |   |   |   |   |   |   |   |   |   |   |   |   |   |   |   |   |   |   |   |   |   |   |   |   |   |   |   |   |   |   |   |   |   |   |   |   |   |   |   |   |   |   |   |   |   |   |   |   |   |   |   |   |   |   |   |   |   |   |   |   |   |   |   |   |
| SARS-CoV-2 NC_045512.2 (29005) | AA     | C       | TG       | CA--   | C     | T     | AAGA     | AA     | T     | C        | TG          | CTGCTGAG | GCTTC | T         | A   | G     | AAGCC             | TC  | GGCA | AAA    | A             | C     | G   | T  | AC         | TG | C     | -AC | TAAAGC | ATACA | A | TGTA | ACA | C | A | G | C | TTTCG | G | C |    |   |   |   |   |     |   |   |   |   |   |   |   |   |   |   |   |   |   |   |      |   |   |   |   |   |   |   |   |   |   |   |   |   |   |   |   |   |   |   |   |   |   |   |   |   |   |   |   |   |   |   |   |   |   |   |   |   |   |   |   |   |   |   |   |   |   |   |   |   |   |   |   |   |   |   |   |   |   |   |   |   |   |   |   |   |   |   |   |   |   |   |   |   |   |   |   |   |   |   |   |   |   |   |   |   |   |   |   |   |   |   |   |   |   |   |   |   |   |   |   |   |   |   |   |   |   |   |   |   |   |   |   |   |   |   |   |   |   |   |   |   |   |   |   |   |   |   |   |   |   |   |   |   |   |   |   |   |   |   |   |   |   |   |   |   |   |   |   |   |   |   |   |   |   |   |   |   |   |   |   |   |   |   |   |   |   |   |   |   |   |   |   |   |   |   |   |   |   |   |   |   |   |   |   |   |   |   |   |   |   |   |   |   |   |   |   |   |   |   |   |   |   |   |   |   |   |   |   |   |   |   |   |   |   |   |   |   |   |   |   |   |   |   |   |   |   |   |   |   |   |   |   |   |   |   |   |   |   |   |   |   |   |   |   |   |   |   |   |   |   |   |   |   |   |   |   |   |   |   |   |   |   |   |   |   |   |   |   |   |   |   |   |   |   |   |   |   |   |   |   |   |   |   |   |   |   |   |   |   |   |   |   |   |   |   |   |   |   |   |   |   |   |   |   |   |   |   |   |   |   |   |   |   |   |   |   |   |   |   |   |   |   |   |   |   |   |   |   |   |   |   |   |   |   |   |   |   |   |   |   |   |   |   |   |   |   |   |   |   |   |   |   |   |   |   |   |   |   |   |   |   |   |   |   |   |   |   |   |   |   |   |   |   |   |   |   |   |   |   |   |   |   |   |   |   |   |   |   |   |   |   |   |   |   |   |   |   |   |   |   |   |   |   |   |   |   |   |   |   |   |   |   |   |   |   |   |   |   |   |   |   |   |   |   |   |   |   |   |   |   |   |   |   |   |   |   |   |   |   |   |   |   |   |   |   |   |   |   |   |   |   |   |   |   |   |   |   |   |   |   |   |   |   |   |   |   |   |   |   |   |   |   |   |   |   |   |   |   |   |   |   |   |   |   |   |   |   |   |   |   |   |   |   |   |   |   |   |   |   |   |   |   |   |   |   |   |   |   |   |   |   |   |   |   |   |   |   |   |   |   |   |   |   |   |   |   |   |   |   |   |   |   |   |   |   |   |   |   |   |   |   |   |   |   |   |   |   |   |   |   |   |   |   |   |   |   |   |   |   |   |   |   |   |   |   |   |   |   |   |   |   |   |   |   |   |   |   |   |   |   |   |   |   |   |   |   |   |   |   |   |   |   |   |   |   |   |   |   |   |   |   |   |   |   |   |   |   |   |   |   |   |   |   |   |   |   |   |   |   |   |   |   |   |   |   |   |   |   |   |   |   |   |   |   |   |   |   |   |   |   |   |   |   |   |   |   |   |   |   |   |   |   |   |   |   |   |   |   |   |   |   |   |   |   |   |   |   |   |   |   |   |   |   |   |   |   |   |   |   |   |   |   |   |   |   |   |   |   |   |   |   |   |   |   |   |   |   |   |   |   |   |   |   |   |   |   |   |   |   |   |   |   |   |   |   |   |   |   |   |   |   |   |   |   |   |   |   |   |   |   |   |   |   |   |   |   |   |   |   |   |   |   |   |   |   |   |   |   |   |   |   |   |   |   |   |   |   |   |   |   |   |   |   |   |   |   |   |   |   |   |   |   |   |   |   |   |   |   |   |   |   |   |   |   |   |   |   |   |   |   |   |   |   |   |   |   |   |   |   |   |   |   |   |   |   |   |   |   |   |   |   |   |   |   |   |   |   |   |   |   |   |   |   |   |   |   |   |   |   |   |   |   |   |   |   |   |   |   |   |   |   |   |   |   |   |   |   |   |   |   |   |   |   |   |   |   |   |   |   |   |   |   |   |   |   |   |   |   |   |   |   |
|                                |        |         |          |        |       |       |          |        |       |          | Section 360 |          |       |           |     |       |                   |     |      |        |               |       |     |    |            |    |       |     |        |       |   |      |     |   |   |   |   |       |   |   |    |   |   |   |   |     |   |   |   |   |   |   |   |   |   |   |   |   |   |   |      |   |   |   |   |   |   |   |   |   |   |   |   |   |   |   |   |   |   |   |   |   |   |   |   |   |   |   |   |   |   |   |   |   |   |   |   |   |   |   |   |   |   |   |   |   |   |   |   |   |   |   |   |   |   |   |   |   |   |   |   |   |   |   |   |   |   |   |   |   |   |   |   |   |   |   |   |   |   |   |   |   |   |   |   |   |   |   |   |   |   |   |   |   |   |   |   |   |   |   |   |   |   |   |   |   |   |   |   |   |   |   |   |   |   |   |   |   |   |   |   |   |   |   |   |   |   |   |   |   |   |   |   |   |   |   |   |   |   |   |   |   |   |   |   |   |   |   |   |   |   |   |   |   |   |   |   |   |   |   |   |   |   |   |   |   |   |   |   |   |   |   |   |   |   |   |   |   |   |   |   |   |   |   |   |   |   |   |   |   |   |   |   |   |   |   |   |   |   |   |   |   |   |   |   |   |   |   |   |   |   |   |   |   |   |   |   |   |   |   |   |   |   |   |   |   |   |   |   |   |   |   |   |   |   |   |   |   |   |   |   |   |   |   |   |   |   |   |   |   |   |   |   |   |   |   |   |   |   |   |   |   |   |   |   |   |   |   |   |   |   |   |   |   |   |   |   |   |   |   |   |   |   |   |   |   |   |   |   |   |   |   |   |   |   |   |   |   |   |   |   |   |   |   |   |   |   |   |   |   |   |   |   |   |   |   |   |   |   |   |   |   |   |   |   |   |   |   |   |   |   |   |   |   |   |   |   |   |   |   |   |   |   |   |   |   |   |   |   |   |   |   |   |   |   |   |   |   |   |   |   |   |   |   |   |   |   |   |   |   |   |   |   |   |   |   |   |   |   |   |   |   |   |   |   |   |   |   |   |   |   |   |   |   |   |   |   |   |   |   |   |   |   |   |   |   |   |   |   |   |   |   |   |   |   |   |   |   |   |   |   |   |   |   |   |   |   |   |   |   |   |   |   |   |   |   |   |   |   |   |   |   |   |   |   |   |   |   |   |   |   |   |   |   |   |   |   |   |   |   |   |   |   |   |   |   |   |   |   |   |   |   |   |   |   |   |   |   |   |   |   |   |   |   |   |   |   |   |   |   |   |   |   |   |   |   |   |   |   |   |   |   |   |   |   |   |   |   |   |   |   |   |   |   |   |   |   |   |   |   |   |   |   |   |   |   |   |   |   |   |   |   |   |   |   |   |   |   |   |   |   |   |   |   |   |   |   |   |   |   |   |   |   |   |   |   |   |   |   |   |   |   |   |   |   |   |   |   |   |   |   |   |   |   |   |   |   |   |   |   |   |   |   |   |   |   |   |   |   |   |   |   |   |   |   |   |   |   |   |   |   |   |   |   |   |   |   |   |   |   |   |   |   |   |   |   |   |   |   |   |   |   |   |   |   |   |   |   |   |   |   |   |   |   |   |   |   |   |   |   |   |   |   |   |   |   |   |   |   |   |   |   |   |   |   |   |   |   |   |   |   |   |   |   |   |   |   |   |   |   |   |   |   |   |   |   |   |   |   |   |   |   |   |   |   |   |   |   |   |   |   |   |   |   |   |   |   |   |   |   |   |   |   |   |   |   |   |   |   |   |   |   |   |   |   |   |   |   |   |   |   |   |   |   |   |   |   |   |   |   |   |   |   |   |   |   |   |   |   |   |   |   |   |   |   |   |   |   |   |   |   |   |   |   |   |   |   |   |   |   |   |   |   |   |   |   |   |   |   |   |   |   |   |   |   |   |   |   |   |   |   |   |   |   |   |   |   |   |   |   |   |   |   |   |   |   |   |   |   |   |   |   |   |   |   |   |   |   |   |   |   |   |   |   |   |   |   |   |   |   |   |   |   |   |   |   |   |   |   |   |   |   |   |   |   |   |   |   |   |   |   |   |   |   |   |   |   |   |   |   |   |   |   |   |   |   |   |   |   |   |   |   |   |   |   |   |   |   |   |   |   |   |
| (34824)                        | 34824  | 34830   | 34840    | 34850  | 34860 | 34870 | 34880    | 34890  | 34900 | 34910    | 34920       |          |       |           |     |       |                   |     |      |        |               |       |     |    |            |    |       |     |        |       |   |      |     |   |   |   |   |       |   |   |    |   |   |   |   |     |   |   |   |   |   |   |   |   |   |   |   |   |   |   |      |   |   |   |   |   |   |   |   |   |   |   |   |   |   |   |   |   |   |   |   |   |   |   |   |   |   |   |   |   |   |   |   |   |   |   |   |   |   |   |   |   |   |   |   |   |   |   |   |   |   |   |   |   |   |   |   |   |   |   |   |   |   |   |   |   |   |   |   |   |   |   |   |   |   |   |   |   |   |   |   |   |   |   |   |   |   |   |   |   |   |   |   |   |   |   |   |   |   |   |   |   |   |   |   |   |   |   |   |   |   |   |   |   |   |   |   |   |   |   |   |   |   |   |   |   |   |   |   |   |   |   |   |   |   |   |   |   |   |   |   |   |   |   |   |   |   |   |   |   |   |   |   |   |   |   |   |   |   |   |   |   |   |   |   |   |   |   |   |   |   |   |   |   |   |   |   |   |   |   |   |   |   |   |   |   |   |   |   |   |   |   |   |   |   |   |   |   |   |   |   |   |   |   |   |   |   |   |   |   |   |   |   |   |   |   |   |   |   |   |   |   |   |   |   |   |   |   |   |   |   |   |   |   |   |   |   |   |   |   |   |   |   |   |   |   |   |   |   |   |   |   |   |   |   |   |   |   |   |   |   |   |   |   |   |   |   |   |   |   |   |   |   |   |   |   |   |   |   |   |   |   |   |   |   |   |   |   |   |   |   |   |   |   |   |   |   |   |   |   |   |   |   |   |   |   |   |   |   |   |   |   |   |   |   |   |   |   |   |   |   |   |   |   |   |   |   |   |   |   |   |   |   |   |   |   |   |   |   |   |   |   |   |   |   |   |   |   |   |   |   |   |   |   |   |   |   |   |   |   |   |   |   |   |   |   |   |   |   |   |   |   |   |   |   |   |   |   |   |   |   |   |   |   |   |   |   |   |   |   |   |   |   |   |   |   |   |   |   |   |   |   |   |   |   |   |   |   |   |   |   |   |   |   |   |   |   |   |   |   |   |   |   |   |   |   |   |   |   |   |   |   |   |   |   |   |   |   |   |   |   |   |   |   |   |   |   |   |   |   |   |   |   |   |   |   |   |   |   |   |   |   |   |   |   |   |   |   |   |   |   |   |   |   |   |   |   |   |   |   |   |   |   |   |   |   |   |   |   |   |   |   |   |   |   |   |   |   |   |   |   |   |   |   |   |   |   |   |   |   |   |   |   |   |   |   |   |   |   |   |   |   |   |   |   |   |   |   |   |   |   |   |   |   |   |   |   |   |   |   |   |   |   |   |   |   |   |   |   |   |   |   |   |   |   |   |   |   |   |   |   |   |   |   |   |   |   |   |   |   |   |   |   |   |   |   |   |   |   |   |   |   |   |   |   |   |   |   |   |   |   |   |   |   |   |   |   |   |   |   |   |   |   |   |   |   |   |   |   |   |   |   |   |   |   |   |   |   |   |   |   |   |   |   |   |   |   |   |   |   |   |   |   |   |   |   |   |   |   |   |   |   |   |   |   |   |   |   |   |   |   |   |   |   |   |   |   |   |   |   |   |   |   |   |   |   |   |   |   |   |   |   |   |   |   |   |   |   |   |   |   |   |   |   |   |   |   |   |   |   |   |   |   |   |   |   |   |   |   |   |   |   |   |   |   |   |   |   |   |   |   |   |   |   |   |   |   |   |   |   |   |   |   |   |   |   |   |   |   |   |   |   |   |   |   |   |   |   |   |   |   |   |   |   |   |   |   |   |   |   |   |   |   |   |   |   |   |   |   |   |   |   |   |   |   |   |   |   |   |   |   |   |   |   |   |   |   |   |   |   |   |   |   |   |   |   |   |   |   |   |   |   |   |   |   |   |   |   |   |   |   |   |   |   |   |   |   |   |   |   |   |   |   |   |   |   |   |   |   |   |   |   |   |   |   |   |   |   |   |   |   |   |   |   |   |   |   |   |   |   |   |   |   |   |   |   |   |   |   |   |   |   |   |   |   |   |   |   |   |   |   |   |   |   |   |   |   |   |   |   |   |   |
| Ad 12 X73487 (32529)           | A      | TGG---- | G        | C      | T     | A     | AAC      | C      | AAG   | C        | CAT         | G        | C     | T         | A   | TGCAG | G                 | C   | A    | G      | C             | G     | T   | G  | TCC        | G  | A     | C   | T      | T     | A | C    | AGG | A | G | G | A | G     | G | A | -A | T | A | C | A | AGG | T | A | G | A | G | C | A | T | A | A | A | A | C | T | ---- | A |   |   |   |   |   |   |   |   |   |   |   |   |   |   |   |   |   |   |   |   |   |   |   |   |   |   |   |   |   |   |   |   |   |   |   |   |   |   |   |   |   |   |   |   |   |   |   |   |   |   |   |   |   |   |   |   |   |   |   |   |   |   |   |   |   |   |   |   |   |   |   |   |   |   |   |   |   |   |   |   |   |   |   |   |   |   |   |   |   |   |   |   |   |   |   |   |   |   |   |   |   |   |   |   |   |   |   |   |   |   |   |   |   |   |   |   |   |   |   |   |   |   |   |   |   |   |   |   |   |   |   |   |   |   |   |   |   |   |   |   |   |   |   |   |   |   |   |   |   |   |   |   |   |   |   |   |   |   |   |   |   |   |   |   |   |   |   |   |   |   |   |   |   |   |   |   |   |   |   |   |   |   |   |   |   |   |   |   |   |   |   |   |   |   |   |   |   |   |   |   |   |   |   |   |   |   |   |   |   |   |   |   |   |   |   |   |   |   |   |   |   |   |   |   |   |   |   |   |   |   |   |   |   |   |   |   |   |   |   |   |   |   |   |   |   |   |   |   |   |   |   |   |   |   |   |   |   |   |   |   |   |   |   |   |   |   |   |   |   |   |   |   |   |   |   |   |   |   |   |   |   |   |   |   |   |   |   |   |   |   |   |   |   |   |   |   |   |   |   |   |   |   |   |   |   |   |   |   |   |   |   |   |   |   |   |   |   |   |   |   |   |   |   |   |   |   |   |   |   |   |   |   |   |   |   |   |   |   |   |   |   |   |   |   |   |   |   |   |   |   |   |   |   |   |   |   |   |   |   |   |   |   |   |   |   |   |   |   |   |   |   |   |   |   |   |   |   |   |   |   |   |   |   |   |   |   |   |   |   |   |   |   |   |   |   |   |   |   |   |   |   |   |   |   |   |   |   |   |   |   |   |   |   |   |   |   |   |   |   |   |   |   |   |   |   |   |   |   |   |   |   |   |   |   |   |   |   |   |   |   |   |   |   |   |   |   |   |   |   |   |   |   |   |   |   |   |   |   |   |   |   |   |   |   |   |   |   |   |   |   |   |   |   |   |   |   |   |   |   |   |   |   |   |   |   |   |   |   |   |   |   |   |   |   |   |   |   |   |   |   |   |   |   |   |   |   |   |   |   |   |   |   |   |   |   |   |   |   |   |   |   |   |   |   |   |   |   |   |   |   |   |   |   |   |   |   |   |   |   |   |   |   |   |   |   |   |   |   |   |   |   |   |   |   |   |   |   |   |   |   |   |   |   |   |   |   |   |   |   |   |   |   |   |   |   |   |   |   |   |   |   |   |   |   |   |   |   |   |   |   |   |   |   |   |   |   |   |   |   |   |   |   |   |   |   |   |   |   |   |   |   |   |   |   |   |   |   |   |   |   |   |   |   |   |   |   |   |   |   |   |   |   |   |   |   |   |   |   |   |   |   |   |   |   |   |   |   |   |   |   |   |   |   |   |   |   |   |   |   |   |   |   |   |   |   |   |   |   |   |   |   |   |   |   |   |   |   |   |   |   |   |   |   |   |   |   |   |   |   |   |   |   |   |   |   |   |   |   |   |   |   |   |   |   |   |   |   |   |   |   |   |   |   |   |   |   |   |   |   |   |   |   |   |   |   |   |   |   |   |   |   |   |   |   |   |   |   |   |   |   |   |   |   |   |   |   |   |   |   |   |   |   |   |   |   |   |   |   |   |   |   |   |   |   |   |   |   |   |   |   |   |   |   |   |   |   |   |   |   |   |   |   |   |   |   |   |   |   |   |   |   |   |   |   |   |   |   |   |   |   |   |   |   |   |   |   |   |   |   |   |   |   |   |   |   |   |   |   |   |   |   |   |   |   |   |   |   |   |   |   |   |   |   |   |   |   |   |   |   |   |   |   |   |   |   |   |   |   |   |   |   |   |   |   |   |   |   |   |   |   |   |   |   |   |   |   |   |   |   |   |
| SARS-CoV-2 NC_045512.2 (29099) | A      | G       | A        | C      | G     | T     | G        | G      | T     | C        | A           | A        | C     | A         | A   | A     | C                 | C   | A    | A      | G             | G     | A   | A  | T          | T  | T     | T   | G      | G     | G | A    | C   | A | G | A | A | C     | T | A | A  | T | C | A | G | A   | C | A | A | G | G | A | A | C | T | T | G | C | C | A | A    | T | T | G | C | A | A | T | T | G | C | A | A | T | T | G | C | A | A | T | T | G | C | C | A | A | T | T | G | C | C | A | A | T | T | G | C | C | A | A | T | T | G | C | C | A | A | T | T | G | C | C | A | A | T | T | G | C | C | A | A | T | T | G | C | C | A | A | T | T | G | C | C | A | A | T | T | G | C | C | A | A | T | T | G | C | C | A | A | T | T | G | C | C | A | A | T | T | G | C | C | A | A | T | T | G | C | C | A | A | T | T | G | C | C | A | A | T | T | G | C | C | A | A | T | T | G | C | C | A | A | T | T | G | C | C | A | A | T | T | G | C | C | A | A | T | T | G | C | C | A | A | T | T | G | C | C | A | A | T | T | G | C | C | A | A | T | T | G | C | C | A | A | T | T | G | C | C | A | A | T | T | G | C | C | A | A | T | T | G | C | C | A | A | T | T | G | C | C | A | A | T | T | G | C | C | A | A | T | T | G | C | C | A | A | T | T | G | C | C | A | A | T | T | G | C | C | A | A | T | T | G | C | C | A | A | T | T | G | C | C | A | A | T | T | G | C | C | A | A | T | T | G | C | C | A | A | T | T | G | C | C | A | A | T | T | G | C | C | A | A | T | T | G | C | C | A | A | T | T | G | C | C | A | A | T | T | G | C | C | A | A | T | T | G | C | C | A | A | T | T | G | C | C | A | A | T | T | G | C | C | A | A | T | T | G | C | C | A | A | T | T | G | C | C | A | A | T | T | G | C | C | A | A | T | T | G | C | C | A | A | T | T | G | C | C | A | A | T | T | G | C | C | A | A | T | T | G | C | C | A | A | T | T | G | C | C | A | A | T | T | G | C | C | A | A | T | T | G | C | C | A | A | T | T | G | C | C | A | A | T | T | G | C | C | A | A | T | T | G | C | C | A | A | T | T | G | C | C | A | A | T | T | G | C | C | A | A | T | T | G | C | C | A | A | T | T | G | C | C | A | A | T | T | G | C | C | A | A | T | T | G | C | C | A | A | T | T | G | C | C | A | A | T | T | G | C | C | A | A | T | T | G | C | C | A | A | T | T | G | C | C | A | A | T | T | G | C | C | A | A | T | T | G | C | C | A | A | T | T | G | C | C | A | A | T | T | G | C | C | A | A | T | T | G | C | C | A | A | T | T | G | C | C | A | A | T | T | G | C | C | A | A | T | T | G | C | C | A | A | T | T | G | C | C | A | A | T | T | G | C | C | A | A | T | T | G | C | C | A | A | T | T | G | C | C | A | A | T | T | G | C | C | A | A | T | T | G | C | C | A | A | T | T | G | C | C | A | A | T | T | G | C | C | A | A | T | T | G | C | C | A | A | T | T | G | C | C | A | A | T | T | G | C | C | A | A | T | T | G | C | C | A | A | T | T | G | C | C | A | A | T | T | G | C | C | A | A | T | T | G | C | C | A | A | T | T | G | C | C | A | A | T | T | G | C | C | A | A | T | T | G | C | C | A | A | T | T | G | C | C | A | A | T | T | G | C | C | A | A | T | T | G | C | C | A | A | T | T | G | C | C | A | A | T | T | G | C | C | A | A | T | T | G | C | C | A | A | T | T | G | C | C | A | A | T | T | G | C | C | A | A | T | T | G | C | C | A | A | T | T | G | C | C | A | A | T | T | G | C | C | A | A | T | T | G | C | C | A | A | T | T | G | C | C | A | A | T | T | G | C | C | A | A | T | T | G | C | C | A | A | T | T | G | C | C | A | A | T | T | G | C | C | A | A | T | T | G | C | C | A | A | T | T | G | C | C | A | A | T | T | G | C | C | A | A | T | T | G | C | C | A | A | T | T | G | C | C | A | A | T | T | G | C | C | A | A | T | T | G | C | C | A | A | T | T | G | C | C | A | A | T | T | G | C | C | A | A | T | T | G | C | C | A | A | T | T | G | C | C | A | A | T | T | G | C | C | A | A | T | T | G | C | C | A | A | T | T | G | C | C | A |

SARS-CoV-2 & Ad12.apr

[illegible]

SARS-CoV-2 & Ad12.apr

|                                |                                                                                                     |       |       |       |       |       |       |       |       |             |       |
|--------------------------------|-----------------------------------------------------------------------------------------------------|-------|-------|-------|-------|-------|-------|-------|-------|-------------|-------|
|                                |                                                                                                     |       |       |       |       |       |       |       |       | Section 372 |       |
| (35988)                        | 35988                                                                                               | 36000 | 36010 | 36020 | 36030 | 36040 | 36050 | 36060 | 36070 | 36084       |       |
| Ad 12 X73487 (33650)           | GTGGAGGTATAACAAAATTTCGCAGGAGAAAAATAACACATAAGCATTAGAGTCGCCCTCTTGTTTAGGCAACATAGCCCCAGGTCCCGTAAAATACAC |       |       |       |       |       |       |       |       |             |       |
| SARS-CoV-2 NC_045512.2 (29904) | -----                                                                                               |       |       |       |       |       |       |       |       |             |       |
|                                |                                                                                                     |       |       |       |       |       |       |       |       | Section 373 |       |
| (36085)                        | 36085                                                                                               | 36090 | 36100 | 36110 | 36120 | 36130 | 36140 | 36150 | 36160 | 36170       | 36181 |
| Ad 12 X73487 (33747)           | ATAAAGAGTCTCAAAAGCAGCCATAATGCCTTACCAGAAAAACAGTACAAAGCCAGGCACAGCAGACACAATCTGCCGCAAGTGCGCACCTTTAATA   |       |       |       |       |       |       |       |       |             |       |
| SARS-CoV-2 NC_045512.2 (29904) | -----                                                                                               |       |       |       |       |       |       |       |       |             |       |
|                                |                                                                                                     |       |       |       |       |       |       |       |       | Section 374 |       |
| (36182)                        | 36182                                                                                               | 36190 | 36200 | 36210 | 36220 | 36230 | 36240 | 36250 | 36260 | 36278       |       |
| Ad 12 X73487 (33844)           | CTGAAAAATAGTGACGTAAATGGCCAAAGTTCGCCTACACAACACAAAAAAACCCCAAAAGCCGCGAAAAAAATCACTTCCGCATATGACTCGGC     |       |       |       |       |       |       |       |       |             |       |
| SARS-CoV-2 NC_045512.2 (29904) | -----                                                                                               |       |       |       |       |       |       |       |       |             |       |
|                                |                                                                                                     |       |       |       |       |       |       |       |       | Section 375 |       |
| (36279)                        | 36279                                                                                               | 36290 | 36300 | 36310 | 36320 | 36330 | 36340 | 36350 | 36360 | 36375       |       |
| Ad 12 X73487 (33941)           | ATAATACGGTGTTCTCAGACACGTACATCCGGCGCGCCCGGCTCCCACGCCGCGCCCCACTTCCTCATCCGCCCAAACCTTACAAGCAGGCCAAAG    |       |       |       |       |       |       |       |       |             |       |
| SARS-CoV-2 NC_045512.2 (29904) | -----                                                                                               |       |       |       |       |       |       |       |       |             |       |
|                                |                                                                                                     |       |       |       |       |       |       |       |       | Section 376 |       |
| (36376)                        | 36376                                                                                               | 36390 | 36400 | 36410 | 36420 | 36430 | 36440 | 36450 | 36463 |             |       |
| Ad 12 X73487 (34038)           | CCACACCTCCACCCAATCAAATTACACACTACGCCCACTTCATTTTAATATTGGCACTAGTCCAGTATAAGGTATATTATTAGATAGG            |       |       |       |       |       |       |       |       |             |       |
| SARS-CoV-2 NC_045512.2 (29904) | -----                                                                                               |       |       |       |       |       |       |       |       |             |       |
