# Supplementary material for: Ubiquitous Micro-Modular Homologies among Genomes from Viruses to Bacteria to Human Mitochondrial DNA: Platforms for Recombination during Evolution?
Source: MDPI journal article supplement (doi:10.3390/v14050885), 2022-04-24
Supplement: s1 [file s1]

| Genomes                                                  | N-mer | Count | % of total | $\Sigma$      |
|----------------------------------------------------------|-------|-------|------------|---------------|
| <i>Sulfolobus turreted icosahedral virus</i>             | 3     | 463   | 60.1       | 770 positions |
|                                                          | 4     | 201   | 26.1       |               |
|                                                          | 5     | 72    | 9.4        |               |
|                                                          | 6     | 24    | 3.1        |               |
|                                                          | 7     | 10    | 1.3        |               |
| <i>Alternaria brassicicola betaendornavirus</i>          | 3     | 230   | 65.9       | 349 positions |
|                                                          | 4     | 77    | 22.1       |               |
|                                                          | 5     | 29    | 8.3        |               |
|                                                          | 6     | 7     | 2.0        |               |
|                                                          | 7     | 3     | 0.9        |               |
|                                                          | 8     | 2     | 0.6        |               |
|                                                          | 9     | 0     | 0          |               |
|                                                          | 10    | 1     | 0.3        |               |
| <i>Fig badnavirus 1</i>                                  | 3     | 222   | 55.9       | 397 positions |
|                                                          | 4     | 99    | 24.9       |               |
|                                                          | 5     | 55    | 13.9       |               |
|                                                          | 6     | 15    | 3.8        |               |
|                                                          | 7     | 4     | 1.0        |               |
|                                                          | 8     | 1     | 0.3        |               |
|                                                          | 9     | 0     | 0          |               |
|                                                          | 10    | 1     | 0.3        |               |
| <i>Autographa californica Nuclear Polyhedrosis Virus</i> | 3     | 383   | 70.3       | 545 positions |
|                                                          | 4     | 112   | 20.6       |               |
|                                                          | 5     | 33    | 6.1        |               |
|                                                          | 6     | 10    | 1.8        |               |
|                                                          | 7     | 4     | 0.7        |               |
|                                                          | 8     | 2     | 0.4        |               |
|                                                          | 9     | 1     | 0.2        |               |
| <i>Escherichia virus lambda</i>                          | 3     | 375   | 70.1       | 535 positions |
|                                                          | 4     | 108   | 20.2       |               |
|                                                          | 5     | 35    | 6.5        |               |
|                                                          | 6     | 11    | 2.1        |               |
|                                                          | 7     | 1     | 0.2        |               |
|                                                          | 8     | 5     | 0.9        |               |
| <i>Human Adenovirus type 12</i>                          | 3     | 565   | 61.2       | 923 positions |
|                                                          | 4     | 245   | 26.5       |               |
|                                                          | 5     | 73    | 7.9        |               |
|                                                          | 6     | 28    | 3.0        |               |
|                                                          | 7     | 4     | 0.4        |               |
|                                                          | 8     | 6     | 0.6        |               |
|                                                          | 9     | 2     | 0.2        |               |
| <i>Hepatitis B Virus</i>                                 | 3     | 56    | 77.8       | 72 positions  |
|                                                          | 4     | 13    | 18.1       |               |
|                                                          | 5     | 3     | 4.2        |               |

| Genomes                                         | N-mer | Count | % of total | Σ              |
|-------------------------------------------------|-------|-------|------------|----------------|
| <i>Human Immunodeficiency Virus</i>             | 3     | 160   | 66.1       | 242 positions  |
|                                                 | 4     | 45    | 18.6       |                |
|                                                 | 5     | 23    | 9.5        |                |
|                                                 | 6     | 13    | 5.4        |                |
|                                                 | 7     | 1     | 0.4        |                |
| <i>Candidatus Carsonella Proteobacterium BT</i> | 3     | 930   | 54.2       | 1714 positions |
|                                                 | 4     | 456   | 26.6       |                |
|                                                 | 5     | 216   | 12.6       |                |
|                                                 | 6     | 68    | 4.0        |                |
|                                                 | 7     | 28    | 1.6        |                |
|                                                 | 8     | 13    | 0.8        |                |
|                                                 | 9     | 2     | 0.1        |                |
| <i>Escherichia Coli K12</i>                     | 3     | 947   | 59.2       | 1599 positions |
|                                                 | 4     | 412   | 25.8       |                |
|                                                 | 5     | 161   | 10.1       |                |
|                                                 | 6     | 49    | 3.1        |                |
|                                                 | 7     | 23    | 1.4        |                |
|                                                 | 8     | 6     | 0.4        |                |
|                                                 | 9     | 0     | 0          |                |
|                                                 | 10    | 0     | 0          |                |
|                                                 | 11    | 1     | 0.06       |                |
| <i>Homo sapiens mitochondrial DNA</i>           | 3     | 490   | 55.2       | 887 positions  |
|                                                 | 4     | 243   | 27.4       |                |
|                                                 | 5     | 96    | 10.8       |                |
|                                                 | 6     | 31    | 3.5        |                |
|                                                 | 7     | 15    | 1.7        |                |
|                                                 | 8     | 11    | 1.2        |                |
|                                                 | 9     | 0     | 0          |                |
|                                                 | 10    | 0     | 0          |                |
|                                                 | 11    | 0     | 0          |                |
|                                                 | 12    | 0     | 0          |                |
|                                                 | 13    | 1     | 0.1        |                |

**Table S2** – Nucleotide sequence comparisons of lengths of identical sequence stretches between the genomes of organisms as indicated and SARS-CoV-2 RNA.
