# Supplementary material for: Ubiquitous Micro-Modular Homologies among Genomes from Viruses to Bacteria to Human Mitochondrial DNA: Platforms for Recombination during Evolution?
Source: MDPI journal article supplement (doi:10.3390/v14050885), 2022-04-24
Supplement: s1 [file s1]

Sars-CoV-2 & E.coli K12 Zwischenstückaprr.apr

|                                                                                             |       |                                                                                      |     |     |     |     |     |     |     |     |  |
|---------------------------------------------------------------------------------------------|-------|--------------------------------------------------------------------------------------|-----|-----|-----|-----|-----|-----|-----|-----|--|
|                                                                                             |       | Section 1                                                                            |     |     |     |     |     |     |     |     |  |
| K12 Zwischenstück 255.328 - 290.948<br>SARS-CoV-2 Reference Genome NC_045512.2<br>Consensus | (1)   | 1                                                                                    | 10  | 20  | 30  | 40  | 50  | 60  | 70  | 83  |  |
|                                                                                             | (1)   | TCGTCAGCCAGAACCGCCAGCGCAGAGGCCATACCAATGCCGTTATCCGCACCCAGCGTGGTGCCGCGCGCTTTAACCCATTC  |     |     |     |     |     |     |     |     |  |
|                                                                                             | (1)   | -----                                                                                |     |     |     |     |     |     |     |     |  |
|                                                                                             |       | Section 2                                                                            |     |     |     |     |     |     |     |     |  |
| K12 Zwischenstück 255.328 - 290.948<br>SARS-CoV-2 Reference Genome NC_045512.2<br>Consensus | (84)  | 84                                                                                   | 90  | 100 | 110 | 120 | 130 | 140 | 150 | 166 |  |
|                                                                                             | (84)  | GCCATCAATATAAGGCTGGATAGGATCTTTCGTGAAGTCATGCACGGTGTCGTTATTTTTCTGCGGCACCATATCGAGGTGGG  |     |     |     |     |     |     |     |     |  |
|                                                                                             | (1)   | -----                                                                                |     |     |     |     |     |     |     |     |  |
|                                                                                             |       | Section 3                                                                            |     |     |     |     |     |     |     |     |  |
| K12 Zwischenstück 255.328 - 290.948<br>SARS-CoV-2 Reference Genome NC_045512.2<br>Consensus | (167) | 167                                                                                  | 180 | 190 | 200 | 210 | 220 | 230 | 249 |     |  |
|                                                                                             | (167) | CCTGTAAGACGACCGGTTTACGATTTTCCATACCTGCGGTAGCAGGTTTACGAATCAGGATATTACCTACCTGATCGCGTTTCG |     |     |     |     |     |     |     |     |  |
|                                                                                             | (1)   | -----                                                                                |     |     |     |     |     |     |     |     |  |
|                                                                                             |       | Section 4                                                                            |     |     |     |     |     |     |     |     |  |
| K12 Zwischenstück 255.328 - 290.948<br>SARS-CoV-2 Reference Genome NC_045512.2<br>Consensus | (250) | 250                                                                                  | 260 | 270 | 280 | 290 | 300 | 310 | 320 | 332 |  |
|                                                                                             | (250) | ACATGGAAACCTTTCTCTTTTGCCCAACCAACAATGTATTCAGCGAGTTGCTCTTCATGATAGGACGGGTGAGGAATAGAACA  |     |     |     |     |     |     |     |     |  |
|                                                                                             | (1)   | -----                                                                                |     |     |     |     |     |     |     |     |  |
|                                                                                             |       | Section 5                                                                            |     |     |     |     |     |     |     |     |  |
| K12 Zwischenstück 255.328 - 290.948<br>SARS-CoV-2 Reference Genome NC_045512.2<br>Consensus | (333) | 333                                                                                  | 340 | 350 | 360 | 370 | 380 | 390 | 400 | 415 |  |
|                                                                                             | (333) | GATTTTGGCAAAAATATCCACAGCGGGCTGTGGAGATAATTGAGACAGTTTCAGACACGTTAAGTCTCCTTGTCGATCACCCGC |     |     |     |     |     |     |     |     |  |
|                                                                                             | (1)   | -----                                                                                |     |     |     |     |     |     |     |     |  |
|                                                                                             |       | Section 6                                                                            |     |     |     |     |     |     |     |     |  |
| K12 Zwischenstück 255.328 - 290.948<br>SARS-CoV-2 Reference Genome NC_045512.2<br>Consensus | (416) | 416                                                                                  | 430 | 440 | 450 | 460 | 470 | 480 | 498 |     |  |
|                                                                                             | (416) | AAAACAGTATTGCAGGTCACAGGGTTAGCAGAAAATGTTGTCAACACAAGACAGGCTTGCGAGATATGTTTGAGAATACCACT  |     |     |     |     |     |     |     |     |  |
|                                                                                             | (1)   | -----                                                                                |     |     |     |     |     |     |     |     |  |
|                                                                                             |       | Section 7                                                                            |     |     |     |     |     |     |     |     |  |
| K12 Zwischenstück 255.328 - 290.948<br>SARS-CoV-2 Reference Genome NC_045512.2<br>Consensus | (499) | 499                                                                                  | 510 | 520 | 530 | 540 | 550 | 560 | 570 | 581 |  |
|                                                                                             | (499) | TTATCCCGCGTCAGGGAGAGGCAGTGCGTAAAAAGACGCGGACTCATGTGAAATACTGGTTTTTGTGCGCCAGATCTCTATA   |     |     |     |     |     |     |     |     |  |
|                                                                                             | (1)   | -----                                                                                |     |     |     |     |     |     |     |     |  |
|                                                                                             | (499) |                                                                                      |     |     |     |     |     |     |     |     |  |

## Sars-CoV-2 &amp; E.coli K12 Zwischenstückeap.r.apr

|                                                                                             |        |                                                                                       |      |      |      |      |      |      |      |      |  |
|---------------------------------------------------------------------------------------------|--------|---------------------------------------------------------------------------------------|------|------|------|------|------|------|------|------|--|
|                                                                                             |        | Section 8                                                                             |      |      |      |      |      |      |      |      |  |
| K12 Zwischenstück 255.328 - 290.948<br>SARS-CoV-2 Reference Genome NC_045512.2<br>Consensus | (582)  | 582                                                                                   | 590  | 600  | 610  | 620  | 630  | 640  | 650  | 664  |  |
|                                                                                             | (582)  | ATCTCGCGCAACCTATTTTCCCTCGAACACTTTTAAAGCCGTAGATAAACAGGCTGGGACACTTCACATGAGCGAAAAATAC    |      |      |      |      |      |      |      |      |  |
|                                                                                             | (1)    | -----                                                                                 |      |      |      |      |      |      |      |      |  |
|                                                                                             | (582)  |                                                                                       |      |      |      |      |      |      |      |      |  |
|                                                                                             |        | Section 9                                                                             |      |      |      |      |      |      |      |      |  |
| K12 Zwischenstück 255.328 - 290.948<br>SARS-CoV-2 Reference Genome NC_045512.2<br>Consensus | (665)  | 665                                                                                   | 670  | 680  | 690  | 700  | 710  | 720  | 730  | 747  |  |
|                                                                                             | (665)  | ATCGTCACCTGGGACATGTTGCAGATCCATGCACGTAAACTCGCAAGCCGACTGATGCCTTCTGAACAATGGAAGGCATTAT    |      |      |      |      |      |      |      |      |  |
|                                                                                             | (1)    | -----                                                                                 |      |      |      |      |      |      |      |      |  |
|                                                                                             | (665)  |                                                                                       |      |      |      |      |      |      |      |      |  |
|                                                                                             |        | Section 10                                                                            |      |      |      |      |      |      |      |      |  |
| K12 Zwischenstück 255.328 - 290.948<br>SARS-CoV-2 Reference Genome NC_045512.2<br>Consensus | (748)  | 748                                                                                   | 760  | 770  | 780  | 790  | 800  | 810  | 820  | 830  |  |
|                                                                                             | (748)  | TGCCGTAAGCCGTGGCGGTCTGGTACCGGGTGCGTTACTGGCGCGTGAAGTGGGTATTCGTCATGTCGATACCGTTTGTATTT   |      |      |      |      |      |      |      |      |  |
|                                                                                             | (1)    | -----                                                                                 |      |      |      |      |      |      |      |      |  |
|                                                                                             | (748)  |                                                                                       |      |      |      |      |      |      |      |      |  |
|                                                                                             |        | Section 11                                                                            |      |      |      |      |      |      |      |      |  |
| K12 Zwischenstück 255.328 - 290.948<br>SARS-CoV-2 Reference Genome NC_045512.2<br>Consensus | (831)  | 831                                                                                   | 840  | 850  | 860  | 870  | 880  | 890  | 900  | 913  |  |
|                                                                                             | (831)  | CCAGCTACGATCACGACAACCAGCGCGAGCTTAAAGTGCTGAAACGCGCAGAAGGCGATGGCGAAGGCTTCATCGTTATTGAT   |      |      |      |      |      |      |      |      |  |
|                                                                                             | (1)    | -----                                                                                 |      |      |      |      |      |      |      |      |  |
|                                                                                             | (831)  |                                                                                       |      |      |      |      |      |      |      |      |  |
|                                                                                             |        | Section 12                                                                            |      |      |      |      |      |      |      |      |  |
| K12 Zwischenstück 255.328 - 290.948<br>SARS-CoV-2 Reference Genome NC_045512.2<br>Consensus | (914)  | 914                                                                                   | 920  | 930  | 940  | 950  | 960  | 970  | 980  | 996  |  |
|                                                                                             | (914)  | GACCTGGTGGATACCGGTGGTACTGCGGTTGCGATTTCGTGAAATGTATCCAAAAGCGCACTTTGTCAACCATCTTCGCAAAACC |      |      |      |      |      |      |      |      |  |
|                                                                                             | (1)    | -----                                                                                 |      |      |      |      |      |      |      |      |  |
|                                                                                             | (914)  |                                                                                       |      |      |      |      |      |      |      |      |  |
|                                                                                             |        | Section 13                                                                            |      |      |      |      |      |      |      |      |  |
| K12 Zwischenstück 255.328 - 290.948<br>SARS-CoV-2 Reference Genome NC_045512.2<br>Consensus | (997)  | 997                                                                                   | 1010 | 1020 | 1030 | 1040 | 1050 | 1060 | 1079 |      |  |
|                                                                                             | (997)  | GGCTGGTCGTCGCTGGTTGATGACTATGTTGTTGATATCCCGCAAGATACCTGGATTGAACAGCCGTGGGATATGGGCGTCG    |      |      |      |      |      |      |      |      |  |
|                                                                                             | (1)    | -----                                                                                 |      |      |      |      |      |      |      |      |  |
|                                                                                             | (997)  |                                                                                       |      |      |      |      |      |      |      |      |  |
|                                                                                             |        | Section 14                                                                            |      |      |      |      |      |      |      |      |  |
| K12 Zwischenstück 255.328 - 290.948<br>SARS-CoV-2 Reference Genome NC_045512.2<br>Consensus | (1080) | 1080                                                                                  | 1090 | 1100 | 1110 | 1120 | 1130 | 1140 | 1150 | 1162 |  |
|                                                                                             | (1080) | TATTCGTCCCGCCAATCTCCGGTCGCTAATCTTTTCAACGCCTGGCACTGCCGGGCGTTGTTCTTTTTAACTTCAGGCGGGTT   |      |      |      |      |      |      |      |      |  |
|                                                                                             | (1)    | -----                                                                                 |      |      |      |      |      |      |      |      |  |
|                                                                                             | (1080) |                                                                                       |      |      |      |      |      |      |      |      |  |

Sars-CoV-2 & E.coli K12 Zwischenstück.eapr.apr

|                                         |        |                                                                                     |      |      |      |      |      |      |      |      |  |
|-----------------------------------------|--------|-------------------------------------------------------------------------------------|------|------|------|------|------|------|------|------|--|
|                                         |        | Section 15                                                                          |      |      |      |      |      |      |      |      |  |
|                                         | (1163) | 1163                                                                                | 1170 | 1180 | 1190 | 1200 | 1210 | 1220 | 1230 | 1245 |  |
| K12 Zwischenstück 255.328 - 290.948     | (1163) | ACAATAGTTTCCAGTAAGTATTCTGGAGGCTGCATCCATGACACAGGCAAACCTGAGCGAAACCCTGTTCAAACCCCGCTTTA |      |      |      |      |      |      |      |      |  |
| SARS-CoV-2 Reference Genome NC_045512.2 | (1)    | -----                                                                               |      |      |      |      |      |      |      |      |  |
| Consensus                               | (1163) |                                                                                     |      |      |      |      |      |      |      |      |  |
|                                         |        | Section 16                                                                          |      |      |      |      |      |      |      |      |  |
|                                         | (1246) | 1246                                                                                | 1260 | 1270 | 1280 | 1290 | 1300 | 1310 | 1328 |      |  |
| K12 Zwischenstück 255.328 - 290.948     | (1246) | AACATCCTGAAACCTCGACGCTAGTCCGCCGCTTTAATCACGGCGCACAAACCGCCTGTGCAGTCGGCCCTTGATGGTAAAC  |      |      |      |      |      |      |      |      |  |
| SARS-CoV-2 Reference Genome NC_045512.2 | (1)    | -----                                                                               |      |      |      |      |      |      |      |      |  |
| Consensus                               | (1246) |                                                                                     |      |      |      |      |      |      |      |      |  |
|                                         |        | Section 17                                                                          |      |      |      |      |      |      |      |      |  |
|                                         | (1329) | 1329                                                                                | 1340 | 1350 | 1360 | 1370 | 1380 | 1390 | 1400 | 1411 |  |
| K12 Zwischenstück 255.328 - 290.948     | (1329) | ATCCCTCACTGGTATCGCATGATTAACCGTCTGATGTGGATCTGGCGCGGCATTGACCCACGCGAAATCCTCGACGTCCAGGC |      |      |      |      |      |      |      |      |  |
| SARS-CoV-2 Reference Genome NC_045512.2 | (1)    | -----                                                                               |      |      |      |      |      |      |      |      |  |
| Consensus                               | (1329) |                                                                                     |      |      |      |      |      |      |      |      |  |
|                                         |        | Section 18                                                                          |      |      |      |      |      |      |      |      |  |
|                                         | (1412) | 1412                                                                                | 1420 | 1430 | 1440 | 1450 | 1460 | 1470 | 1480 | 1494 |  |
| K12 Zwischenstück 255.328 - 290.948     | (1412) | ACGTATTGTGATGAGCGATGCCGAACGTACCGACGATGATTTATACGATACGGTGATTGGCTACCGTGGCGGCAACTGGATTT |      |      |      |      |      |      |      |      |  |
| SARS-CoV-2 Reference Genome NC_045512.2 | (1)    | -----                                                                               |      |      |      |      |      |      |      |      |  |
| Consensus                               | (1412) |                                                                                     |      |      |      |      |      |      |      |      |  |
|                                         |        | Section 19                                                                          |      |      |      |      |      |      |      |      |  |
|                                         | (1495) | 1495                                                                                | 1500 | 1510 | 1520 | 1530 | 1540 | 1550 | 1560 | 1577 |  |
| K12 Zwischenstück 255.328 - 290.948     | (1495) | ATGAGTGGGCCACCCAGGCGATGGTGTGGCAACAAAAGCCTGTGCGGAAGACGATCCGCAACTCAGTGGTCGTCACTGGCTG  |      |      |      |      |      |      |      |      |  |
| SARS-CoV-2 Reference Genome NC_045512.2 | (1)    | -----                                                                               |      |      |      |      |      |      |      |      |  |
| Consensus                               | (1495) |                                                                                     |      |      |      |      |      |      |      |      |  |
|                                         |        | Section 20                                                                          |      |      |      |      |      |      |      |      |  |
|                                         | (1578) | 1578                                                                                | 1590 | 1600 | 1610 | 1620 | 1630 | 1640 | 1650 | 1660 |  |
| K12 Zwischenstück 255.328 - 290.948     | (1578) | CATGCGGCTACGTTGTACAACATTGCCGCCTATCCTCATCTGAAAGGAGATGACCTGGCCGAGCAAGCGCAGGCTTTGTCAAA |      |      |      |      |      |      |      |      |  |
| SARS-CoV-2 Reference Genome NC_045512.2 | (1)    | -----ATTAAAGGTTTATACCTT                                                             |      |      |      |      |      |      |      |      |  |
| Consensus                               | (1578) | AAGGTTCT                                                                            |      |      |      |      |      |      |      |      |  |
|                                         |        | Section 21                                                                          |      |      |      |      |      |      |      |      |  |
|                                         | (1661) | 1661                                                                                | 1670 | 1680 | 1690 | 1700 | 1710 | 1720 | 1730 | 1743 |  |
| K12 Zwischenstück 255.328 - 290.948     | (1661) | CCGCCTATGAG-AGGCGCTCAGCGTCTACCGG-GCAGATGCGGCAGATGGAGTTTACCGTACCCGGCGGTGCGCCCAT      |      |      |      |      |      |      |      |      |  |
| SARS-CoV-2 Reference Genome NC_045512.2 | (19)   | CCCAAGTAACAACCAACCTTTCGATCTTGTAGATCTGTCTCTAAACGAACTTTAAAT-----CTGTGTGGCTGT          |      |      |      |      |      |      |      |      |  |
| Consensus                               | (1661) | CCGAAACCTTCTGGCTCTAAGATTATCTCTGTGCT                                                 |      |      |      |      |      |      |      |      |  |

Sars-CoV-2 & E.coli K12 Zwischenstückeaapr.apr

|                                         |        |            |      |       |      |      |      |      |      |       |      |     |        |
|-----------------------------------------|--------|------------|------|-------|------|------|------|------|------|-------|------|-----|--------|
|                                         |        | Section 22 |      |       |      |      |      |      |      |       |      |     |        |
|                                         |        | (1744)     | 1744 | 1750  | 1760 | 1770 | 1780 | 1790 | 1800 | 1810  | 1826 |     |        |
| K12 Zwischenstück 255.328 - 290.948     | (1742) | CAC        | -    | CGGCT | TTT  | TGC  | ATA  | TGC  | GA   | AAGG  | CG   | AT  | GGCCCG |
| SARS-CoV-2 Reference Genome NC_045512.2 | (96)   | CAC        | T    | CGGCT | GCA  | TGC  | TA   | GTGC | -    | ACTCA | CG   | CAG | TATAAA |
| Consensus                               | (1744) | CAC        |      | CGGCT |      | TGC  | TA   |      | C    | A     |      | CG  | G      |
|                                         |        | Section 23 |      |       |      |      |      |      |      |       |      |     |        |
|                                         |        | (1827)     | 1827 | 1840  | 1850 | 1860 | 1870 | 1880 | 1890 | 1909  |      |     |        |
| K12 Zwischenstück 255.328 - 290.948     | (1824) | ---        | GAC  | CT    | AT   | TA   | CAG  | C    | CTG  | TAT   | GA   | ACG | TT     |
| SARS-CoV-2 Reference Genome NC_045512.2 | (175)  | TCT        | TAT  | CT    | TCT  | TG   | CAG  | G    | CTG  | CT    | T    | ACG | GT     |
| Consensus                               | (1827) |            |      | CT    |      | T    | CAG  |      | CTG  |       | T    | ACG |        |
|                                         |        | Section 24 |      |       |      |      |      |      |      |       |      |     |        |
|                                         |        | (1910)     | 1910 | 1920  | 1930 | 1940 | 1950 | 1960 | 1970 | 1980  | 1992 |     |        |
| K12 Zwischenstück 255.328 - 290.948     | (1904) | T          | T    | C     | T    | T    | C    | A    | A    | A     | T    | G   | A      |
| SARS-CoV-2 Reference Genome NC_045512.2 | (250)  | G          | T    | G     | A    | C    | G    | A    | A    | G     | G    | T   | A      |
| Consensus                               | (1910) | T          |      | C     |      | A    |      | A    |      | A     |      | G   |        |
|                                         |        | Section 25 |      |       |      |      |      |      |      |       |      |     |        |
|                                         |        | (1993)     | 1993 | 2000  | 2010 | 2020 | 2030 | 2040 | 2050 | 2060  | 2075 |     |        |
| K12 Zwischenstück 255.328 - 290.948     | (1987) | A          | T    | C     | A    | C    | A    | C    | T    | T     | C    | G   | C      |
| SARS-CoV-2 Reference Genome NC_045512.2 | (325)  | T          | T    | A     | C    | A    | G    | G    | T    | C     | G    | C   | G      |
| Consensus                               | (1993) | T          |      | A     |      | C    |      | A    |      | G     |      | C   |        |
|                                         |        | Section 26 |      |       |      |      |      |      |      |       |      |     |        |
|                                         |        | (2076)     | 2076 | 2090  | 2100 | 2110 | 2120 | 2130 | 2140 | 2158  |      |     |        |
| K12 Zwischenstück 255.328 - 290.948     | (2068) | T          | G    | A     | A    | G    | C    | G    | T    | T     | G    | C   | T      |
| SARS-CoV-2 Reference Genome NC_045512.2 | (402)  | T          | T    | A     | A    | G    | A    | T    | G    | C     | T    | T   | G      |
| Consensus                               | (2076) | T          |      | A     |      | A    |      | G    |      | C     |      | T   |        |
|                                         |        | Section 27 |      |       |      |      |      |      |      |       |      |     |        |
|                                         |        | (2159)     | 2159 | 2170  | 2180 | 2190 | 2200 | 2210 | 2220 | 2230  | 2241 |     |        |
| K12 Zwischenstück 255.328 - 290.948     | (2146) | T          | G    | T     | A    | T    | C    | T    | T    | G     | A    | C   | G      |
| SARS-CoV-2 Reference Genome NC_045512.2 | (473)  | T          | T    | C     | A    | T    | C    | A    | T    | T     | G    | A   | C      |
| Consensus                               | (2159) | T          |      | A     |      | T    |      | C    |      | T     |      | G   |        |
|                                         |        | Section 28 |      |       |      |      |      |      |      |       |      |     |        |
|                                         |        | (2242)     | 2242 | 2250  | 2260 | 2270 | 2280 | 2290 | 2300 | 2310  | 2324 |     |        |
| K12 Zwischenstück 255.328 - 290.948     | (2229) | T          | T    | A     | A    | A    | G    | T    | G    | C     | A    | A   | G      |
| SARS-CoV-2 Reference Genome NC_045512.2 | (549)  | T          | T    | C     | A    | G    | T    | A    | C    | T     | G    | C   | A      |
| Consensus                               | (2242) | T          |      | A     |      | G    |      | T    |      | C     |      | A   |        |

Sars-CoV-2 & E.coli K12 Zwischenstücke apr.apr

|                                                                                             |        |                                                                                                                                                                                                                      |      |      |      |      |      |      |      |      |  |  |  |  |  |  |  |
|---------------------------------------------------------------------------------------------|--------|----------------------------------------------------------------------------------------------------------------------------------------------------------------------------------------------------------------------|------|------|------|------|------|------|------|------|--|--|--|--|--|--|--|
|                                                                                             |        | Section 29                                                                                                                                                                                                           |      |      |      |      |      |      |      |      |  |  |  |  |  |  |  |
| K12 Zwischenstück 255.328 - 290.948<br>SARS-CoV-2 Reference Genome NC 045512.2<br>Consensus | (2325) | 2325                                                                                                                                                                                                                 | 2330 | 2340 | 2350 | 2360 | 2370 | 2380 | 2390 | 2407 |  |  |  |  |  |  |  |
|                                                                                             | (2306) | CC- <b>CGGAAGA</b> GGAC <b>TCA</b> CGCT <b>TAA</b> TCAC <b>CTCAT</b> C <b>TGCTGACGG</b> TA-- <b>ATT</b> TATT <b>AGAGAT</b> CCCC <b>ATT</b> TAAC <b>CCG-GT</b> STA                                                    |      |      |      |      |      |      |      |      |  |  |  |  |  |  |  |
|                                                                                             | (632)  | CTT <b>CGTAAGA</b> ACGG <b>TAA</b> --- <b>TAA</b> GG <b>AGCTGGTGGC</b> GA <b>TAGTTACGG</b> CGCC <b>ATCTAAAGTCAT</b> TT <b>GTAC</b> TTA <b>GGC</b> GAC <b>GAGCT</b>                                                   |      |      |      |      |      |      |      |      |  |  |  |  |  |  |  |
|                                                                                             | (2325) | C CG AAGA T A T AA A CT T C T T AC GG AT AG AT A TTA C G G                                                                                                                                                           |      |      |      |      |      |      |      |      |  |  |  |  |  |  |  |
| Section 30                                                                                  |        |                                                                                                                                                                                                                      |      |      |      |      |      |      |      |      |  |  |  |  |  |  |  |
| K12 Zwischenstück 255.328 - 290.948<br>SARS-CoV-2 Reference Genome NC 045512.2<br>Consensus | (2408) | 2408                                                                                                                                                                                                                 | 2420 | 2430 | 2440 | 2450 | 2460 | 2470 | 2480 | 2490 |  |  |  |  |  |  |  |
|                                                                                             | (2384) | <b>TCGGA</b> --- <b>ATTTT</b> GA <b>CA</b> <b>AAGG</b> <b>TCTTCAG</b> <b>GAAAT</b> C <b>ACCGAC</b> TGG <b>ATCG</b> <b>AAAAC</b> G <b>CTTGTGT</b> TA <b>AAAA</b> <b>TTTG</b> <b>CTAA</b> ATTT <b>TGCC</b>             |      |      |      |      |      |      |      |      |  |  |  |  |  |  |  |
|                                                                                             | (712)  | <b>TGGCA</b> CTG <b>ATCC</b> <b>TTATG</b> <b>AAGA</b> <b>ATTTC</b> A <b>GAAAA</b> C <b>TGGAAC</b> ACT <b>AAAC</b> <b>ATAG</b> CA <b>G-TG</b> <b>TGTGT</b> TA <b>CCCG</b> <b>TGAACT</b> CA <b>TGCG</b> <b>TGAG</b>    |      |      |      |      |      |      |      |      |  |  |  |  |  |  |  |
|                                                                                             | (2408) | T G A AT T A AAG T TTCA GAAA C AC A A A G T GTGTTA T CT A TG                                                                                                                                                         |      |      |      |      |      |      |      |      |  |  |  |  |  |  |  |
| Section 31                                                                                  |        |                                                                                                                                                                                                                      |      |      |      |      |      |      |      |      |  |  |  |  |  |  |  |
| K12 Zwischenstück 255.328 - 290.948<br>SARS-CoV-2 Reference Genome NC 045512.2<br>Consensus | (2491) | 2491                                                                                                                                                                                                                 | 2500 | 2510 | 2520 | 2530 | 2540 | 2550 | 2560 | 2573 |  |  |  |  |  |  |  |
|                                                                                             | (2464) | AA <b>TTTG</b> <b>GTAAA</b> ACAG <b>TTG</b> CA <b>TCACA</b> CA <b>GAG</b> ATA <b>GCAA-TG</b> AC <b>GT</b> TA <b>CCGAG-TGG</b> AC <b>ACCC</b> GAA- <b>GAG</b> CAG <b>ATT</b> GATC <b>AAA</b>                          |      |      |      |      |      |      |      |      |  |  |  |  |  |  |  |
|                                                                                             | (794)  | CT <b>TAA</b> C <b>GGA</b> GGGGCA <b>TAC</b> AC <b>TCGCTA</b> T- <b>GTC</b> GATA <b>CAA</b> CT <b>TCTGT</b> GG <b>CCCTGA</b> <b>TGGCT</b> <b>ACCC</b> TCTT <b>GAG</b> TGC <b>ATT</b> ---- <b>AAA</b>                 |      |      |      |      |      |      |      |      |  |  |  |  |  |  |  |
|                                                                                             | (2491) | T G A T TC C A G GATA CAA T GT CC G TGG ACCC GAG ATT AAA                                                                                                                                                             |      |      |      |      |      |      |      |      |  |  |  |  |  |  |  |
| Section 32                                                                                  |        |                                                                                                                                                                                                                      |      |      |      |      |      |      |      |      |  |  |  |  |  |  |  |
| K12 Zwischenstück 255.328 - 290.948<br>SARS-CoV-2 Reference Genome NC 045512.2<br>Consensus | (2574) | 2574                                                                                                                                                                                                                 | 2580 | 2590 | 2600 | 2610 | 2620 | 2630 | 2640 | 2656 |  |  |  |  |  |  |  |
|                                                                                             | (2544) | AA <b>ATTT</b> ACC <b>GCAC</b> TAG <b>GCC</b> <b>GTA</b> TA-- <b>TTC</b> GT <b>GA</b> <b>AAGGTAG</b> G-- <b>TAA</b> TG <b>ACTCC</b> AAC <b>TTATT</b> GA <b>TAGT</b> GT <b>TTTT</b> TAT <b>GTTC</b> AG <b>ATA</b>     |      |      |      |      |      |      |      |      |  |  |  |  |  |  |  |
|                                                                                             | (872)  | <b>GACC</b> <b>TTCTA</b> <b>GCAC</b> GT <b>G-CTG</b> <b>GTA</b> AA <b>GCTTC</b> AT <b>GC</b> ACT <b>TTGT</b> CCG <b>AA</b> CA <b>ACTGG</b> ACT <b>TTATT</b> GA <b>CACT</b> TAAGAGGG <b>GTGT</b> ATA <b>ACT</b>       |      |      |      |      |      |      |      |      |  |  |  |  |  |  |  |
|                                                                                             | (2574) | A TT GCAC G C GTA A TTC TG A T G AA ACT A TTATTGA A T GT A A                                                                                                                                                         |      |      |      |      |      |      |      |      |  |  |  |  |  |  |  |
| Section 33                                                                                  |        |                                                                                                                                                                                                                      |      |      |      |      |      |      |      |      |  |  |  |  |  |  |  |
| K12 Zwischenstück 255.328 - 290.948<br>SARS-CoV-2 Reference Genome NC 045512.2<br>Consensus | (2657) | 2657                                                                                                                                                                                                                 | 2670 | 2680 | 2690 | 2700 | 2710 | 2720 | 2739 |      |  |  |  |  |  |  |  |
|                                                                                             | (2623) | ATGC <b>CCG</b> ATG <b>ACTTT</b> GT <b>CATG</b> CA----- <b>GCTCC</b> AC <b>CGA</b> --- <b>TTT</b> TG <b>AGAA</b> CGA <b>CAGC</b> GA <b>CTTC</b> CGTC <b>CCAG</b> CG <b>TGCC</b> AGG                                  |      |      |      |      |      |      |      |      |  |  |  |  |  |  |  |
|                                                                                             | (954)  | GCTG <b>CCG</b> TGA <b>ACAT</b> AG <b>CATG</b> AA <b>ATTG</b> CTT <b>GTTAC</b> AG <b>GACG</b> <b>TTCT</b> GA <b>AAAG</b> AGC <b>TATGA</b> ATT <b>G</b> CAG <b>AC-AC</b> CTTT <b>TGA</b> AA <b>T</b>                  |      |      |      |      |      |      |      |      |  |  |  |  |  |  |  |
|                                                                                             | (2657) | CCG AC T CATG A G T CAC GA TT TGA AA C GA TT C C A C T A                                                                                                                                                             |      |      |      |      |      |      |      |      |  |  |  |  |  |  |  |
| Section 34                                                                                  |        |                                                                                                                                                                                                                      |      |      |      |      |      |      |      |      |  |  |  |  |  |  |  |
| K12 Zwischenstück 255.328 - 290.948<br>SARS-CoV-2 Reference Genome NC 045512.2<br>Consensus | (2740) | 2740                                                                                                                                                                                                                 | 2750 | 2760 | 2770 | 2780 | 2790 | 2800 | 2810 | 2822 |  |  |  |  |  |  |  |
|                                                                                             | (2696) | <b>TG</b> CTGCCT <b>CAG</b> ATTC <b>AGGTT</b> ATG <b>CCGC</b> <b>TCAAT</b> TC <b>GCTGC</b> <b>GTAT</b> ATCGC <b>TTG</b> CTGA <b>TTAC</b> GT <b>GCA</b> GC <b>TTTCC</b> CT <b>TCAG</b> GC <b>CGGGA</b>                |      |      |      |      |      |      |      |      |  |  |  |  |  |  |  |
|                                                                                             | (1036) | <b>TAA</b> ATTGG <b>CAA</b> AGAA <b>ATT</b> TG <b>ACA</b> <b>CC</b> T- <b>TCAAT</b> GG <b>GGAAT</b> <b>GTCC</b> <b>AA</b> ATT <b>TTG</b> - <b>TATTT</b> CC <b>TTAA</b> AT <b>TCC</b> ATA <b>TCAG</b> AG <b>ACT-A</b> |      |      |      |      |      |      |      |      |  |  |  |  |  |  |  |
|                                                                                             | (2740) | T CA A A T A CC TCAAT G GT A TTG T TT C T A T TCA G A                                                                                                                                                                |      |      |      |      |      |      |      |      |  |  |  |  |  |  |  |
| Section 35                                                                                  |        |                                                                                                                                                                                                                      |      |      |      |      |      |      |      |      |  |  |  |  |  |  |  |
| K12 Zwischenstück 255.328 - 290.948<br>SARS-CoV-2 Reference Genome NC 045512.2<br>Consensus | (2823) | 2823                                                                                                                                                                                                                 | 2830 | 2840 | 2850 | 2860 | 2870 | 2880 | 2890 | 2905 |  |  |  |  |  |  |  |
|                                                                                             | (2779) | <b>TTCA</b> TA <b>CAGC</b> GGCC <b>AGCC</b> ATCCGT <b>CA</b> T <b>CATAT</b> C <b>AC</b> CA <b>CGTCA</b> AA <b>AGGGT</b> GA <b>CAG</b> CAG <b>GCTC</b> ATAAG <b>ACG</b> CCCC <b>GCGTC</b> G <b>CCA</b>                |      |      |      |      |      |      |      |      |  |  |  |  |  |  |  |
|                                                                                             | (1116) | <b>TTCA</b> AC <b>CA</b> AG <b>GG</b> TT- <b>GAA</b> AGAAAA <b>AG</b> TT <b>GAT</b> GG <b>----</b> <b>TTT</b> AT <b>GGGT</b> - <b>AGA</b> ATTC <b>GATC</b> TGTCT <b>ATC</b> CAGTT <b>GCGTC</b> AC <b>CCA</b>         |      |      |      |      |      |      |      |      |  |  |  |  |  |  |  |
|                                                                                             | (2823) | TTCA CA GG G A A C AT C T A GGGT A A G TC A C GCGTC CCA                                                                                                                                                              |      |      |      |      |      |      |      |      |  |  |  |  |  |  |  |

Sars-CoV-2 & E.coli K12 Zwischenstück.eapr.apr

|                                         |        |                                                                                                       |      |      |      |      |      |      |      |      |      |
|-----------------------------------------|--------|-------------------------------------------------------------------------------------------------------|------|------|------|------|------|------|------|------|------|
|                                         |        | Section 36                                                                                            |      |      |      |      |      |      |      |      |      |
|                                         |        | (2906)                                                                                                | 2906 | 2920 | 2930 | 2940 | 2950 | 2960 | 2970 | 2988 |      |
| K12 Zwischenstück 255.328 - 290.948     | (2862) | TAGTGCCTTCAACCGAATACGTGCGCAAACAACGCTTCCGGAGACTGTCATACGCGTAAACAGCCAGCGCTGCGCGATT                       |      |      |      |      |      |      |      |      |      |
| SARS-CoV-2 Reference Genome NC_045512.2 | (1193) | AA-TGAAATGCAACCAA-ATGTGCGCTTTCAACCTCAT--GAAGTGTGATCATGTGTGTGAACATTATGGCAGACGGCGATT                    |      |      |      |      |      |      |      |      |      |
| Consensus                               | (2906) | A T G T C A C A A A G T G C C A A C T C T G A G T G T C A T G T A A A C C G C G C G C G C A T T       |      |      |      |      |      |      |      |      |      |
|                                         |        | Section 37                                                                                            |      |      |      |      |      |      |      |      |      |
|                                         |        | (2989)                                                                                                | 2989 | 3000 | 3010 | 3020 | 3030 | 3040 | 3050 | 3060 | 3071 |
| K12 Zwischenstück 255.328 - 290.948     | (2943) | TAGCCCCGACATAGCCCAACTGTTCGTCCATTTCGCCGACGACATGACGTCACCTGCCCAGGCTGTATGCGCGAGGTTACCGAC                  |      |      |      |      |      |      |      |      |      |
| SARS-CoV-2 Reference Genome NC_045512.2 | (1272) | TTGT-----TAAAGCAACT-TGCGAATTTTGTGGCACTGAGAAATTGACTAAAAGAGGTGCCACTACTTTGTGGTTACTTAC                    |      |      |      |      |      |      |      |      |      |
| Consensus                               | (2989) | T G T A C C A C T T C G T T G C C G A A T A G G T C G G T T A C A C G G T T A C A C                   |      |      |      |      |      |      |      |      |      |
|                                         |        | Section 38                                                                                            |      |      |      |      |      |      |      |      |      |
|                                         |        | (3072)                                                                                                | 3072 | 3080 | 3090 | 3100 | 3110 | 3120 | 3130 | 3140 | 3154 |
| K12 Zwischenstück 255.328 - 290.948     | (3026) | TGGGCCAGTCTTTTAAAGTGACGTAAATTCGTGTAGGCAACGCTCCATAATGCGGCTGTGTCCTCCATCAACGCCA                          |      |      |      |      |      |      |      |      |      |
| SARS-CoV-2 Reference Genome NC_045512.2 | (1347) | CCCAAAAAGCTGTGTTTAA-----AAATTTATGTCCAG--CATGTCAACA--ATTCAGAAGTAGGACCTGAG--CATAGTCT                    |      |      |      |      |      |      |      |      |      |
| Consensus                               | (3072) | C T G T T T T A A A A T T T G T A G C A C A C A A T C G G C C G C A G C A G C                         |      |      |      |      |      |      |      |      |      |
|                                         |        | Section 39                                                                                            |      |      |      |      |      |      |      |      |      |
|                                         |        | (3155)                                                                                                | 3155 | 3160 | 3170 | 3180 | 3190 | 3200 | 3210 | 3220 | 3237 |
| K12 Zwischenstück 255.328 - 290.948     | (3109) | TTC--ATGGCCATATCAATGATTCTCTGGTGGTACCGGGGTGAGAAAGCGGTGTAAAGTGAAGTGCAGTTGCCATGTTTACGG                   |      |      |      |      |      |      |      |      |      |
| SARS-CoV-2 Reference Genome NC_045512.2 | (1417) | TGCCGAATAACCATATGAATCTGGCTTGAAAACCAATTCCTCATAAGGGTGTGCG--ACTA--TTGCC--TTTGGAGG                        |      |      |      |      |      |      |      |      |      |
| Consensus                               | (3155) | T C A C C A T A T G A T T T G A C C T G A G G T G G A C T T T G C C T T T G G                         |      |      |      |      |      |      |      |      |      |
|                                         |        | Section 40                                                                                            |      |      |      |      |      |      |      |      |      |
|                                         |        | (3238)                                                                                                | 3238 | 3250 | 3260 | 3270 | 3280 | 3290 | 3300 | 3310 | 3320 |
| K12 Zwischenstück 255.328 - 290.948     | (3190) | CAGTGAGAGCAGAGATAGCGCT--GATGTCCGGCGGTGCTTTTGCCGT-ACGCAACACCCCGTCAGTAGCTGAACAGGAGG                     |      |      |      |      |      |      |      |      |      |
| SARS-CoV-2 Reference Genome NC_045512.2 | (1489) | CTGTGTGTTCTCTTATGTTGGTTGCCATAAAGAGTGTGCTATTGCGGTTCACGTGCTAGCGCTAACATAGTTGTAAACCAT-                    |      |      |      |      |      |      |      |      |      |
| Consensus                               | (3238) | C G T G G C A T G T A T C G G C T T T G C T T T A C G C A C C T A G T A A A                           |      |      |      |      |      |      |      |      |      |
|                                         |        | Section 41                                                                                            |      |      |      |      |      |      |      |      |      |
|                                         |        | (3321)                                                                                                | 3321 | 3330 | 3340 | 3350 | 3360 | 3370 | 3380 | 3390 | 3403 |
| K12 Zwischenstück 255.328 - 290.948     | (3269) | GACAGCTGATAGAAACAGAAGCCACTGGAGCACCTCAAAACACCATCATACACTAAATCAGTAAG--TTGGCAGCATCAACC                    |      |      |      |      |      |      |      |      |      |
| SARS-CoV-2 Reference Genome NC_045512.2 | (1571) | -ACAGGTGTTTGTGGAGAAGGTTCCGAAGGTCTTAATGACACCTCTTGAAATACTCCAAAAGAGAGAAAGTCAACATCAAT                     |      |      |      |      |      |      |      |      |      |
| Consensus                               | (3321) | A C A G T G T G A G A A G C G A G C T A A A C C T C T A A A C C T C T A T A C A A A G G C A C A T C A |      |      |      |      |      |      |      |      |      |
|                                         |        | Section 42                                                                                            |      |      |      |      |      |      |      |      |      |
|                                         |        | (3404)                                                                                                | 3404 | 3410 | 3420 | 3430 | 3440 | 3450 | 3460 | 3470 | 3486 |
| K12 Zwischenstück 255.328 - 290.948     | (3349) | --TGAAAGGTAAAGTGCAAAATAAATCGATTTCCTTTGATTGCTGCTATGCGTCAACGTTGAAAACCGGCACCGGAAGTGG                     |      |      |      |      |      |      |      |      |      |
| SARS-CoV-2 Reference Genome NC_045512.2 | (1652) | ATTGTTGGTGACTTTAACTTAATGAGAGATCGCAATTATTTTGGCATCTTTTCTGCTT----CCACAAAGTGGCTTTTGTG                     |      |      |      |      |      |      |      |      |      |
| Consensus                               | (3404) | T G G G T A T A A A T A A T G A T C A T T T T G T T T C T C T T C C A A G T G T T T G T G             |      |      |      |      |      |      |      |      |      |

Sars-CoV-2 & E.coli K12 Zwischenstückaprr.apr

|                                         |        |                                                                                        |      |      |      |      |      |      |      |      |      |
|-----------------------------------------|--------|----------------------------------------------------------------------------------------|------|------|------|------|------|------|------|------|------|
|                                         |        | Section 43                                                                             |      |      |      |      |      |      |      |      |      |
|                                         |        | (3487)                                                                                 | 3487 | 3500 | 3510 | 3520 | 3530 | 3540 | 3550 | 3569 |      |
| K12 Zwischenstück 255.328 - 290.948     | (3430) | TGAAATCTG---GGGCTGGTGGATGGAGC-TGGAAAGCGCAG---GAATCCGTTTTACCT--ACAGTTACAGTTTTGGTCTG     |      |      |      |      |      |      |      |      |      |
| SARS-CoV-2 Reference Genome NC_045512.2 | (1730) | GAAACTGTGAAAAGTTGGATTATAAAGCAATTCAAACAAATTGTTGAATCCGTGGTAATTTTAAAGTTACAAA--GGAAAA      |      |      |      |      |      |      |      |      |      |
| Consensus                               | (3487) | AA T TG GG TGG AT AGC T AA C A GAATCC GT TA T A AGTTAC A GG                            |      |      |      |      |      |      |      |      |      |
|                                         |        | Section 44                                                                             |      |      |      |      |      |      |      |      |      |
|                                         |        | (3570)                                                                                 | 3570 | 3580 | 3590 | 3600 | 3610 | 3620 | 3630 | 3640 | 3652 |
| K12 Zwischenstück 255.328 - 290.948     | (3503) | TTCGATAAAGCAGGCGACTGGGAAGTGTTC--CGGTAAAGACACTGAAG--TGGTTGAAACGACTGGAGCACACCCTGCGTG     |      |      |      |      |      |      |      |      |      |
| SARS-CoV-2 Reference Genome NC_045512.2 | (1811) | ---GCTAAAGAAAGGTGCTGGGAATATTGGTGAACAGAAATCAATACTGAGTCCCTCTTATGTCATTGTCATCAGAGGCTGCTCG  |      |      |      |      |      |      |      |      |      |
| Consensus                               | (3570) | G TAAAGAGG G CTGGAA A TG T C G AA A ACTGA T TT C TG A CA A CTGC G                      |      |      |      |      |      |      |      |      |      |
|                                         |        | Section 45                                                                             |      |      |      |      |      |      |      |      |      |
|                                         |        | (3653)                                                                                 | 3653 | 3660 | 3670 | 3680 | 3690 | 3700 | 3710 | 3720 | 3735 |
| K12 Zwischenstück 255.328 - 290.948     | (3582) | AGTTTCACGAGAAAGCTG---CGTGAAGTGTGACGACGCTGAA---TCTGAAGCTGG--AACCGGCGGATGATTTT-CGTGAC    |      |      |      |      |      |      |      |      |      |
| SARS-CoV-2 Reference Genome NC_045512.2 | (1891) | TGTGTACGATCAATTTCTCTCCCGCACTCTTGAAGCTGCTAAATCTGTGCGTGTGTTTACAGAAAGGCCGCTATTAACAATAC    |      |      |      |      |      |      |      |      |      |
| Consensus                               | (3653) | GTT ACGA A T C G ACT TGA GCT AA TCTG TG AC G GG G T T C AC                             |      |      |      |      |      |      |      |      |      |
|                                         |        | Section 46                                                                             |      |      |      |      |      |      |      |      |      |
|                                         |        | (3736)                                                                                 | 3736 | 3750 | 3760 | 3770 | 3780 | 3790 | 3800 | 3818 |      |
| K12 Zwischenstück 255.328 - 290.948     | (3656) | GAGCCGG----TGA-AGTTAAAGGCGGTGAGTGAAGATGTGCG-GATGCAACACATCCGGCAATATTCATTAAAACTGATACGT   |      |      |      |      |      |      |      |      |      |
| SARS-CoV-2 Reference Genome NC_045512.2 | (1974) | TAGATGGAAATTTCACAGTATTCACTGAGACTCAATTGATGCTATGATGT-TCACATCTGATTGTCCTACTAACAACTCTAGTTGT |      |      |      |      |      |      |      |      |      |
| Consensus                               | (3736) | AG GG T A AGT C G GA T A TGC GATG TCACATC G T T A AA A GT                              |      |      |      |      |      |      |      |      |      |
|                                         |        | Section 47                                                                             |      |      |      |      |      |      |      |      |      |
|                                         |        | (3819)                                                                                 | 3819 | 3830 | 3840 | 3850 | 3860 | 3870 | 3880 | 3890 | 3901 |
| K12 Zwischenstück 255.328 - 290.948     | (3733) | CATGCCAACCGCGACAATATCATCATTTATTAAATTTCAATTTGTTATCGCTATCCAG-----TTGGTTGATTTTATAATCAAC   |      |      |      |      |      |      |      |      |      |
| SARS-CoV-2 Reference Genome NC_045512.2 | (2056) | AATGGCCTACATTACAGG-TGGTG-TTGTTCAG-TTGACTTCGCAGTGGCTAACTAACATCTTTGGCACTGTTTATGAAAAC     |      |      |      |      |      |      |      |      |      |
| Consensus                               | (3819) | ATG C C ACA T T TT TT A TT A TT G T GCTA C A TTGG TTTAT A AAC                          |      |      |      |      |      |      |      |      |      |
|                                         |        | Section 48                                                                             |      |      |      |      |      |      |      |      |      |
|                                         |        | (3902)                                                                                 | 3902 | 3910 | 3920 | 3930 | 3940 | 3950 | 3960 | 3970 | 3984 |
| K12 Zwischenstück 255.328 - 290.948     | (3811) | --AAACGCTGACATATTTTGTGTTGAAATATACGTAGCACCAGCTCGATATAAATTGACCAAGATCTTCATCACCGGATACCTTC  |      |      |      |      |      |      |      |      |      |
| SARS-CoV-2 Reference Genome NC_045512.2 | (2136) | TCAAACCGCTCTGATTGGCTTGAAAGAGATTAGAGGAAGGTGTAGAGTTTCTTTAGAGACGGTTGGGAAATTGTATAATT-      |      |      |      |      |      |      |      |      |      |
| Consensus                               | (3902) | AAAC C C T TT TTGAA A TA G GT GA T TT A T A G TA TT                                    |      |      |      |      |      |      |      |      |      |
|                                         |        | Section 49                                                                             |      |      |      |      |      |      |      |      |      |
|                                         |        | (3985)                                                                                 | 3985 | 3990 | 4000 | 4010 | 4020 | 4030 | 4040 | 4050 | 4067 |
| K12 Zwischenstück 255.328 - 290.948     | (3892) | AAATATCTTTCCTTTTCGATAAAGACATAACCCAGCGATGGAGCA--GACCAAAATCAAACTGGATTGAGCGACCGCTTCAAA    |      |      |      |      |      |      |      |      |      |
| SARS-CoV-2 Reference Genome NC_045512.2 | (2218) | --TATCTCAAACCTGTGCTTGTGAATGTG----GGTGGACAAATTGTACCTGTGCAAAGGAAATTAGGAGAGTGTTCAGA       |      |      |      |      |      |      |      |      |      |
| Consensus                               | (3985) | TATCT CCT T T GA AT C G TGGAC A G C GT AA G ATT AG TTCA A                              |      |      |      |      |      |      |      |      |      |

Sars-CoV-2 & E.coli K12 Zwischenstück.epr.apr

|                                         |        |            |       |      |       |       |      |       |       |       |        |
|-----------------------------------------|--------|------------|-------|------|-------|-------|------|-------|-------|-------|--------|
|                                         |        | Section 50 |       |      |       |       |      |       |       |       |        |
|                                         |        | (4068)     | 4068  | 4080 | 4090  | 4100  | 4110 | 4120  | 4130  | 4140  | 4150   |
| K12 Zwischenstück 255.328 - 290.948     | (3973) | GT         | TC    | TG   | TG    | TCTTA | TTG  | GCAA  | AGCCG | CCAG  | TTATT  |
| SARS-CoV-2 Reference Genome NC_045512.2 | (2295) | CAT        | TCTT  | TAA  | GCTTG | TA    | AA   | TA    | ----  | AA    | TTT    |
| Consensus                               | (4068) | T          | T     | T    | T     | TTG   | AA   | A     | TT    | TTGGC | T      |
|                                         |        | Section 51 |       |      |       |       |      |       |       |       |        |
|                                         |        | (4151)     | 4151  | 4160 | 4170  | 4180  | 4190 | 4200  | 4210  | 4220  | 4233   |
| K12 Zwischenstück 255.328 - 290.948     | (4054) | ATTG       | GCAT  | CGT  | ATTT  | CAG   | ACCT | GT    | TGCC  | CAT   | GC     |
| SARS-CoV-2 Reference Genome NC_045512.2 | (2367) | AA         | --    | GCC  | TT    | GA    | ATTT | AG    | ----  | GT    | GAAA   |
| Consensus                               | (4151) | A          | GC    | T    | G     | ATTT  | AG   | GT    | CAT   | TT    | T      |
|                                         |        | Section 52 |       |      |       |       |      |       |       |       |        |
|                                         |        | (4234)     | 4234  | 4240 | 4250  | 4260  | 4270 | 4280  | 4290  | 4300  | 4316   |
| K12 Zwischenstück 255.328 - 290.948     | (4137) | GATC       | T     | GAG  | TT    | GTA   | TA   | GGCC  | CC    | ACTA  | ATG    |
| SARS-CoV-2 Reference Genome NC_045512.2 | (2430) | AATC       | CA    | GAG  | AAG   | AA    | ACT  | GGCC  | T     | ACT   | CATG   |
| Consensus                               | (4234) | ATC        | GAG   | G    | A     | GGCC  | ACT  | ATG   | C     | A     | GCC    |
|                                         |        | Section 53 |       |      |       |       |      |       |       |       |        |
|                                         |        | (4317)     | 4317  | 4330 | 4340  | 4350  | 4360 | 4370  | 4380  |       | 4399   |
| K12 Zwischenstück 255.328 - 290.948     | (4219) | GTTTTG     | CT    | TTT  | TAAC  | CTC   | CG   | GTT   | TC    | GTT   | TTTC   |
| SARS-CoV-2 Reference Genome NC_045512.2 | (2510) | ACAGAAG    | T     | TTA  | CA    | GAG   | AA   | GTT   | TC    | TT    | GAAAA  |
| Consensus                               | (4317) | T          | TT    | A    | G     | G     | GTT  | TC    | T     | C     | TGAT   |
|                                         |        | Section 54 |       |      |       |       |      |       |       |       |        |
|                                         |        | (4400)     | 4400  | 4410 | 4420  | 4430  | 4440 | 4450  | 4460  | 4470  | 4482   |
| K12 Zwischenstück 255.328 - 290.948     | (4301) | TCGGTGT    | TCC   | GAT  | AC    | GT    | CG   | CC    | AG    | ACC   | GCTGG  |
| SARS-CoV-2 Reference Genome NC_045512.2 | (2592) | C          | ----- | TCC  | AT    | TG    | GT   | GT    | AC    | CC    | A----- |
| Consensus                               | (4400) | TCC        | AT    | GT   | G     | A     | ACC  | GTTTG | T     | TAA   | G      |
|                                         |        | Section 55 |       |      |       |       |      |       |       |       |        |
|                                         |        | (4483)     | 4483  | 4490 | 4500  | 4510  | 4520 | 4530  | 4540  | 4550  | 4565   |
| K12 Zwischenstück 255.328 - 290.948     | (4384) | CGG        | GAA   | CA   | TAT   | CG    | GT   | CG    | AGG   | CTT   | CAC    |
| SARS-CoV-2 Reference Genome NC_045512.2 | (2651) | ACA        | GAA   | A    | GTA   | CT    | GT   | GC    | --    | CTT   | GAC    |
| Consensus                               | (4483) | GAA        | A     | C    | GT    | C     | CTT  | CAC   | T     | ATA   | A      |
|                                         |        | Section 56 |       |      |       |       |      |       |       |       |        |
|                                         |        | (4566)     | 4566  | 4580 | 4590  | 4600  | 4610 | 4620  | 4630  |       | 4648   |
| K12 Zwischenstück 255.328 - 290.948     | (4467) | TCAAC      | CC    | GG   | CAAA  | AG    | CGA  | GAC   | GC    | GT    | TTTT   |
| SARS-CoV-2 Reference Genome NC_045512.2 | (2723) | -----      | CC    | AA   | CAAA  | GG    | TAA  | CTTT  | GT    | TGA   | TGAC   |
| Consensus                               | (4566) | CC         | CAAA  | G    | A     | G     | T    | T     | C     | TG    | TA     |



Sars-CoV-2 & E.coli K12 Zwischenstücke apr.apr

|                                                                                             |        |            |     |      |     |      |     |       |     |      |       |      |       |      |     |      |      |       |
|---------------------------------------------------------------------------------------------|--------|------------|-----|------|-----|------|-----|-------|-----|------|-------|------|-------|------|-----|------|------|-------|
|                                                                                             |        | Section 57 |     |      |     |      |     |       |     |      |       |      |       |      |     |      |      |       |
| K12 Zwischenstück 255.328 - 290.948<br>SARS-CoV-2 Reference Genome NC_045512.2<br>Consensus | (4649) | 4649       |     | 4660 |     | 4670 |     | 4680  |     | 4690 |       | 4700 |       | 4710 |     | 4720 | 4731 |       |
|                                                                                             | (4549) | ACCAT      | AA  | CC   | AG  | TC   | AG  | TT    | TGA | TC   | GC    | CT   | ----- | TT   | GAA | AC   | CA   | AAA   |
|                                                                                             | (2801) | GATGA      | AA  | GG   | AT  | TG   | ATA | AAG   | TAC | TTA  | AT    | GAG  | AA    | GTG  | CT  | GC   | CT   | ATAC  |
|                                                                                             | (4649) |            | AA  |      | A   | T    | A   |       | T   | TTA  | AT    |      | GTG   | T    |     | GCCT |      | TTGAA |
|                                                                                             |        | Section 58 |     |      |     |      |     |       |     |      |       |      |       |      |     |      |      |       |
| K12 Zwischenstück 255.328 - 290.948<br>SARS-CoV-2 Reference Genome NC_045512.2<br>Consensus | (4732) | 4732       |     | 4740 |     | 4750 |     | 4760  |     | 4770 |       | 4780 |       | 4790 |     | 4800 | 4814 |       |
|                                                                                             | (4673) | CTTT       | TAC | TGGC | GTT | TAT  | CAC | TC    | ATA | TAA  | TGC   | AT   | GGC   | TTTA | ACT | TTT  | GC   |       |
|                                                                                             | (2883) | GTG        | TTG | TGGC | AG  | ATG  | CTG | TC    | ATA | AAA  | ----- | ACT  | TTT   | GC   | AA  | CC   | AGT  |       |
|                                                                                             | (4732) |            | T   | T    |     | TGGC |     | C     | TC  | ATA  | AA    |      |       |      | ACT | TTT  | GC   |       |
|                                                                                             |        | Section 59 |     |      |     |      |     |       |     |      |       |      |       |      |     |      |      |       |
| K12 Zwischenstück 255.328 - 290.948<br>SARS-CoV-2 Reference Genome NC_045512.2<br>Consensus | (4815) | 4815       |     | 4820 |     | 4830 |     | 4840  |     | 4850 |       | 4860 |       | 4870 |     | 4880 | 4897 |       |
|                                                                                             | (4706) | TC         | TGC | AG   | CC  | TG   | TAC | AG    | AT  | GC   | CAG   | ATG  | CC    | ACA  | AT  | G    | CC   |       |
|                                                                                             | (2951) | GAT        | TT  | AG   | A   | TG   | --- | AG    | TG  | G    | AGT   | ATG  | G     | C    | TAC | ATA  | C    |       |
|                                                                                             | (4815) |            | T   | AG   |     | TG   |     | AG    |     | G    |       | ATG  |       | C    |     | AT   |      |       |
|                                                                                             |        | Section 60 |     |      |     |      |     |       |     |      |       |      |       |      |     |      |      |       |
| K12 Zwischenstück 255.328 - 290.948<br>SARS-CoV-2 Reference Genome NC_045512.2<br>Consensus | (4898) | 4898       |     | 4910 |     | 4920 |     | 4930  |     | 4940 |       | 4950 |       | 4960 |     | 4970 | 4980 |       |
|                                                                                             | (4789) | TA         | AT  | TAA  | C   | G    | C   | G     | GA  | GA   | GT    | CCC  | G     | TT   | GAA | AA   | C    |       |
|                                                                                             | (3026) | TA         | T   | TG   | TT  | CT   | TT  | CT    | AG  | AT   | TT    | CT   | AG    | AT   | TT  | CT   | AG   |       |
|                                                                                             | (4898) |            | T   | A    |     | T    |     | C     |     | C    | A     |      | T     |      | C   | A    |      |       |
|                                                                                             |        | Section 61 |     |      |     |      |     |       |     |      |       |      |       |      |     |      |      |       |
| K12 Zwischenstück 255.328 - 290.948<br>SARS-CoV-2 Reference Genome NC_045512.2<br>Consensus | (4981) | 4981       |     | 4990 |     | 5000 |     | 5010  |     | 5020 |       | 5030 |       | 5040 |     | 5050 | 5063 |       |
|                                                                                             | (4872) | G          | AT  | TAA  | TA  | ATA  | TT  | CT    | TAA | ATG  | TGG   | TA   | AT    | TT   | TAT | TAAA | T    |       |
|                                                                                             | (3104) | T          | AT  | G    | AT  | TGG  | T   | ACT   | G   | AA   | ATG   | AT   | TA    | CCA  | AGG | TAAA | CT   |       |
|                                                                                             | (4981) |            | A   | T    |     | A    |     | T     |     | A    |       | A    |       | T    |     | A    |      |       |
|                                                                                             |        | Section 62 |     |      |     |      |     |       |     |      |       |      |       |      |     |      |      |       |
| K12 Zwischenstück 255.328 - 290.948<br>SARS-CoV-2 Reference Genome NC_045512.2<br>Consensus | (5064) | 5064       |     | 5070 |     | 5080 |     | 5090  |     | 5100 |       | 5110 |       | 5120 |     | 5130 | 5146 |       |
|                                                                                             | (4955) | C          | G   | CA   | AA  | CA   | AG  | CC    | AT  | G    | CT    | TT   | G     | CT   | GC  | TA   | AT   |       |
|                                                                                             | (3186) | A          | G   | CA   | AA  | GA   | GA  | ----- | TT  | G    | GT    | TA   | G     | AT   | G   | AT   | GA   |       |
|                                                                                             | (5064) |            | G   | CA   |     | AA   |     | A     |     | G    |       |      |       | TT   | G   | T    |      |       |
|                                                                                             |        | Section 63 |     |      |     |      |     |       |     |      |       |      |       |      |     |      |      |       |
| K12 Zwischenstück 255.328 - 290.948<br>SARS-CoV-2 Reference Genome NC_045512.2<br>Consensus | (5147) | 5147       |     | 5160 |     | 5170 |     | 5180  |     | 5190 |       | 5200 |       | 5210 |     | 5229 |      |       |
|                                                                                             | (5038) | C          | T   | AAA  | AT  | TG   | AA  | TGG   | CA  | G    | AG    | AA   | T     | CA   | AG  | AG   |      |       |
|                                                                                             | (3261) | CA         | A   | CT   | A   | CT   | --  | AT    | TC  | AA   | CA    | AT   | T     | GT   | AG  | GT   |      |       |
|                                                                                             | (5147) |            | C   | A    |     | A    |     | T     |     | TG   | AG    |      | CA    |      | CC  |      |      |       |

Sars-CoV-2 & E.coli K12 Zwischenstückapr.apr

|                                         |        |            |        |       |        |           |         |       |        |       |          |        |            |         |        |      |       |       |       |       |       |       |      |       |       |       |       |       |       |       |    |      |     |    |    |     |    |   |    |
|-----------------------------------------|--------|------------|--------|-------|--------|-----------|---------|-------|--------|-------|----------|--------|------------|---------|--------|------|-------|-------|-------|-------|-------|-------|------|-------|-------|-------|-------|-------|-------|-------|----|------|-----|----|----|-----|----|---|----|
|                                         |        | Section 64 |        |       |        |           |         |       |        |       |          |        |            |         |        |      |       |       |       |       |       |       |      |       |       |       |       |       |       |       |    |      |     |    |    |     |    |   |    |
|                                         |        | (5230)     | 5230   | 5240  | 5250   | 5260      | 5270    | 5280  | 5290   | 5300  | 5312     |        |            |         |        |      |       |       |       |       |       |       |      |       |       |       |       |       |       |       |    |      |     |    |    |     |    |   |    |
| K12 Zwischenstück 255.328 - 290.948     | (5120) | GCGCC      | GTCTGA | ACCG  | GTGCCC | ATATCG    | TGAACTT | GTTCG | CCAGTG | CGCG  | CAGTTACA | TGCCCG | CGGGCATCGG | ATTGT   | TATT   |      |       |       |       |       |       |       |      |       |       |       |       |       |       |       |    |      |     |    |    |     |    |   |    |
| SARS-CoV-2 Reference Genome NC_045512.2 | (3340) | GAATA      | GTTTTA | ---   | GTG    | GTTATTTAA | ---     | AACTT | ACTTGA | CAATG | TATACAT  | TAAAA  | TGCAGAC    | -----   | ATTGT  | ---- |       |       |       |       |       |       |      |       |       |       |       |       |       |       |    |      |     |    |    |     |    |   |    |
| Consensus                               | (5230) | G          | GT     | T     | A      | GTG       | AT      | T     | AACTT  | T     | G        | CA     | TG         | CA      | T      | A    | A     | TGC   | G     | C     | ATTGT |       |      |       |       |       |       |       |       |       |    |      |     |    |    |     |    |   |    |
|                                         |        | Section 65 |        |       |        |           |         |       |        |       |          |        |            |         |        |      |       |       |       |       |       |       |      |       |       |       |       |       |       |       |    |      |     |    |    |     |    |   |    |
|                                         |        | (5313)     | 5313   | 5320  | 5330   | 5340      | 5350    | 5360  | 5370   | 5380  | 5395     |        |            |         |        |      |       |       |       |       |       |       |      |       |       |       |       |       |       |       |    |      |     |    |    |     |    |   |    |
| K12 Zwischenstück 255.328 - 290.948     | (5207) | GTGAC      | GTCTG  | GGCG  | GGATCG | CCCG      | ACGTG   | AGC   | CTGG   | GGTT  | ACCC     | GGAA   | CTGC       | CAG     | CGACCA | TGCG | CCTCG | AAACA | AC    | TG    | CT    |       |      |       |       |       |       |       |       |       |    |      |     |    |    |     |    |   |    |
| SARS-CoV-2 Reference Genome NC_045512.2 | (3403) | -----      | GGAA   | GAA   | GGTA   | AAAAAG    | GTAA    | AC    | CA     | ---   | ACAGT    | GGTT   | ---        | GTTA    | TGCA   | GC   | CAATG | TTAC  | CCTT  | AAACA | ---   | TGGA  |      |       |       |       |       |       |       |       |    |      |     |    |    |     |    |   |    |
| Consensus                               | (5313) |            | G      | G     | GC     | A         | G       | AC    | AC     | AGT   | GGTT     |        |            | G       | A      | TGC  | C     | A     | T     | CCT   | AAACA | TG    |      |       |       |       |       |       |       |       |    |      |     |    |    |     |    |   |    |
|                                         |        | Section 66 |        |       |        |           |         |       |        |       |          |        |            |         |        |      |       |       |       |       |       |       |      |       |       |       |       |       |       |       |    |      |     |    |    |     |    |   |    |
|                                         |        | (5396)     | 5396   | 5410  | 5420   | 5430      | 5440    | 5450  | 5460   | 5478  |          |        |            |         |        |      |       |       |       |       |       |       |      |       |       |       |       |       |       |       |    |      |     |    |    |     |    |   |    |
| K12 Zwischenstück 255.328 - 290.948     | (5285) | GGCGG      | CGGT   | AGG   | GCAG   | AGT       | CGACT   | GATT  | CAACT  | GTGGG | AAACA    | GCTG   | TTTT       | TCGATTT | ATG    | G    | CAT   | CAC   | GT    | C     | GGGC  | AAATG | C    | TG    | C     |       |       |       |       |       |    |      |     |    |    |     |    |   |    |
| SARS-CoV-2 Reference Genome NC_045512.2 | (3470) | GGAGG      | TGT    | TGCAG | GAG    | CC        | TAA     | AT    | AGG    | GT    | ACT      | ---    | ---        | ---     | ATG    | C    | CAT   | G     | CA    | AGT   | TG    | A     | ---  | ATC   | TG    | ATG   |       |       |       |       |    |      |     |    |    |     |    |   |    |
| Consensus                               | (5396) | GG         | GG     | G     | T      | G         | AG      | T     | A      | T     | A        | C      | ACT        |         | AAACA  |      | ATG   | CAT   | CA    | GT    | G     | A     | TG   | TG    |       |       |       |       |       |       |    |      |     |    |    |     |    |   |    |
|                                         |        | Section 67 |        |       |        |           |         |       |        |       |          |        |            |         |        |      |       |       |       |       |       |       |      |       |       |       |       |       |       |       |    |      |     |    |    |     |    |   |    |
|                                         |        | (5479)     | 5479   | 5490  | 5500   | 5510      | 5520    | 5530  | 5540   | 5550  | 5561     |        |            |         |        |      |       |       |       |       |       |       |      |       |       |       |       |       |       |       |    |      |     |    |    |     |    |   |    |
| K12 Zwischenstück 255.328 - 290.948     | (5368) | TGAC       | CCGT   | GCT   | GAT    | TA        | TG      | GAA   | GACC   | GTGA  | ACG      | CTTC   | CT         | GAA     | CG     | CCG  | CG    | AC    | AC    | CT    | GC    | G     | AG   | CA    | ACA   | AT    | AT    | CG    | T     |       |    |      |     |    |    |     |    |   |    |
| SARS-CoV-2 Reference Genome NC_045512.2 | (3532) | TTAC       | ATA    | ---   | GCT    | AC        | TA      | ATG   | ---    | GACC  | A        | ---    | ---        | CT      | TAA    | AG   | TGG   | GT    | G     | TTA   | AG    | CG    | GAC  | ACA   | AT    | CT    | T     | G     | CT    |       |    |      |     |    |    |     |    |   |    |
| Consensus                               | (5479) | T          | AC     |       | GCT    | TA        | G       | GACC  |        |       |          |        | CT         | AA      | G      | G    | G     | A     |       | G     | G     | TT    | CG   | ACA   | AT    | T     | G     | T     |       |       |    |      |     |    |    |     |    |   |    |
|                                         |        | Section 68 |        |       |        |           |         |       |        |       |          |        |            |         |        |      |       |       |       |       |       |       |      |       |       |       |       |       |       |       |    |      |     |    |    |     |    |   |    |
|                                         |        | (5562)     | 5562   | 5570  | 5580   | 5590      | 5600    | 5610  | 5620   | 5630  | 5644     |        |            |         |        |      |       |       |       |       |       |       |      |       |       |       |       |       |       |       |    |      |     |    |    |     |    |   |    |
| K12 Zwischenstück 255.328 - 290.948     | (5451) | CCGGT      | AA     | TCA   | TG     | AGAA      | CGATG   | CT    | GTG    | CTAC  | GGC      | AGA    | G          | AG      | TTAA   | GGTC | GGC   | G     | ATA   | AC    | G     | ATA   | AC   | CTT   | TCTG  | CG    | CT    | GG    | CG    | GAT   |    |      |     |    |    |     |    |   |    |
| SARS-CoV-2 Reference Genome NC_045512.2 | (3599) | -----      | AA     | CA    | TG     | TCTTC     | C       | ATG   | TG     | TCG   | GCC      | ---    | AA         | ATG     | TTAA   | CAAA | GGT   | GA    | AG    | AC    | AT    | TCA   | ACTT | ----- | ----- | ----- | ----- | ----- | ----- | ----- |    |      |     |    |    |     |    |   |    |
| Consensus                               | (5562) |            | AA     | CA    | TG     |           | C       | ATG   | TG     | TCG   | C        |        | A          | A       | TTAA   | GG   | GA    | AC    | T     | A     | CTT   |       |      |       |       |       |       |       |       |       |    |      |     |    |    |     |    |   |    |
|                                         |        | Section 69 |        |       |        |           |         |       |        |       |          |        |            |         |        |      |       |       |       |       |       |       |      |       |       |       |       |       |       |       |    |      |     |    |    |     |    |   |    |
|                                         |        | (5645)     | 5645   | 5650  | 5660   | 5670      | 5680    | 5690  | 5700   | 5710  | 5727     |        |            |         |        |      |       |       |       |       |       |       |      |       |       |       |       |       |       |       |    |      |     |    |    |     |    |   |    |
| K12 Zwischenstück 255.328 - 290.948     | (5534) | TCTT       | GC     | GG    | GTGC   | CG        | AT      | AAA   | CTG    | TT    | GCTG     | GT     | GAC        | CGA     | TCA    | AAA  | AGGT  | TTG   | T     | ATAC  | CG    | CT    | G    | TG    | AC    | CC    | GC    | G     | CA    | GC    | AG |      |     |    |    |     |    |   |    |
| SARS-CoV-2 Reference Genome NC_045512.2 | (3656) | -          | CTT    | AAG   | GTGC   | TT        | AT      | GAA   | AAT    | TT    | TAAT     | CAG    | CA         | CGA     | AG     | TTCT | AC    | ---   | TTG   | A     | CC    | ATT   | T    | AT    | CA    | G     | CT    | G     | ---   | G     | AT | TTT  | TG  | GT | G  | CT  | G  |   |    |
| Consensus                               | (5645) |            | CTT    | G     | GTGC   | AT        | AA      | TT    |        |       | C        | G      | CGA        |         | A      | TTG  | A     |       | T     | A     | C     | GC    | G    | A     | T     |       |       |       |       | GC    | G  |      |     |    |    |     |    |   |    |
|                                         |        | Section 70 |        |       |        |           |         |       |        |       |          |        |            |         |        |      |       |       |       |       |       |       |      |       |       |       |       |       |       |       |    |      |     |    |    |     |    |   |    |
|                                         |        | (5728)     | 5728   | 5740  | 5750   | 5760      | 5770    | 5780  | 5790   | 5800  | 5810     |        |            |         |        |      |       |       |       |       |       |       |      |       |       |       |       |       |       |       |    |      |     |    |    |     |    |   |    |
| K12 Zwischenstück 255.328 - 290.948     | (5617) | AA         | CTG    | AT    | TAA    | AG        | AT      | G     | TTTA   | CG    | GCA      | TTG    | ATG        | AC      | GC     | ACTG | CG    | CGC   | GATTG | CCGG  | TG    | AC    | AG   | CG    | TTT   | CAG   | GC    | CT    | CG    | ---   | AA | CTGG | CGG |    |    |     |    |   |    |
| SARS-CoV-2 Reference Genome NC_045512.2 | (3735) | ACC        | CT     | AT    | ACA    | T         | ---     | T     | CTTTA  | AG    | AGT      | TTG    | TG         | T       | AG     | AT   | CTG   | TT    | CGC   | A     | ---   | CAAA  | TG   | T     | CT    | AC    | T     | AG    | CT    | G     | T  | CT   | T   | G  | AT | AAA | AT | C | TC |
| Consensus                               | (5728) | A          | C      | AT    | A      | T         |         |       | T      | TTTA  | G        | TTG    | A          |         | ACTG   | CGC  |       | C     | TG    | C     | C     | T     | C    | G     | C     | T     | G     | AA    |       |       | C  |      |     |    |    |     |    |   |    |

Sars-CoV-2 & E.coli K12 Zwischenstück apr.apr

|                                         |        |            |        |       |      |       |       |       |       |        |       |      |     |      |       |       |     |     |      |      |     |      |        |     |     |     |     |       |       |       |        |      |     |      |     |     |      |     |     |     |      |      |    |   |    |    |    |   |   |
|-----------------------------------------|--------|------------|--------|-------|------|-------|-------|-------|-------|--------|-------|------|-----|------|-------|-------|-----|-----|------|------|-----|------|--------|-----|-----|-----|-----|-------|-------|-------|--------|------|-----|------|-----|-----|------|-----|-----|-----|------|------|----|---|----|----|----|---|---|
|                                         |        | Section 71 |        |       |      |       |       |       |       |        |       |      |     |      |       |       |     |     |      |      |     |      |        |     |     |     |     |       |       |       |        |      |     |      |     |     |      |     |     |     |      |      |    |   |    |    |    |   |   |
|                                         |        | (5811)     | 5811   | 5820  | 5830 | 5840  | 5850  | 5860  | 5870  | 5880   | 5893  |      |     |      |       |       |     |     |      |      |     |      |        |     |     |     |     |       |       |       |        |      |     |      |     |     |      |     |     |     |      |      |    |   |    |    |    |   |   |
| K12 Zwischenstück 255.328 - 290.948     | (5699) | C          | ATGA   | AGTAC | CAAA | TTG   | CAG   | GC    | CGCT  | GACGT  | GGCT  | TG   | CC  | GT   | CG    | GGT   | AT  | CG  | A    | CACC | ATT | ATT  | GCCG   | CG  | GGC | AG  | CA  | AG    | CC    | GGGCG |        |      |     |      |     |     |      |     |     |     |      |      |    |   |    |    |    |   |   |
| SARS-CoV-2 Reference Genome NC_045512.2 | (3812) | T          | ATGA   | CAAA  | CTTG | TTT   | CA    | GC    | TTT   | TG---  | GAAAT | TG   | AAG | AGT  | G     | AAA   | AG  | CA  | AGTT | G    | AAC | AAA  | AGAT   | CG  | CTG | AG  | -   | ATT   | CC    | ----- |        |      |     |      |     |     |      |     |     |     |      |      |    |   |    |    |    |   |   |
| Consensus                               | (5811) |            | ATGA   | A     | C    | TT    | CA    | GC    | T     |        | G     | TG   | G   | G    | G     |       | A   | C   | A    |      | A   | A    |        | CG  |     | AG  | A   |       | CC    |       |        |      |     |      |     |     |      |     |     |     |      |      |    |   |    |    |    |   |   |
|                                         |        | Section 72 |        |       |      |       |       |       |       |        |       |      |     |      |       |       |     |     |      |      |     |      |        |     |     |     |     |       |       |       |        |      |     |      |     |     |      |     |     |     |      |      |    |   |    |    |    |   |   |
|                                         |        | (5894)     | 5894   | 5900  | 5910 | 5920  | 5930  | 5940  | 5950  | 5960   | 5976  |      |     |      |       |       |     |     |      |      |     |      |        |     |     |     |     |       |       |       |        |      |     |      |     |     |      |     |     |     |      |      |    |   |    |    |    |   |   |
| K12 Zwischenstück 255.328 - 290.948     | (5787) | T          | TATT   | G     | GT   | GAT   | GT    | GAT   | GGA   | AG     | G     | CATT | T   | CCGT | G     | GT    | TAC | G   | CT   | G    | TT  | CCAT | T      | GCC | CAG | G   | CG  | ACT   | CCG   | TTG   | AAA    | ACC  | GT  | AAAC | G   | CTG | G    |     |     |     |      |      |    |   |    |    |    |   |   |
| SARS-CoV-2 Reference Genome NC_045512.2 | (3886) | -          | TAAA   | GAG   | GAA  | GT    | T     | A     | ---   | AG     | C     | CATT | T   | A    | TAA   | CT    | GAA | AG  | -    | TAAA | CC  | T    | ---    | CAG | --- | --- | --- | ---   | ---   | TTGAA | C      | AGA  | G   | AAAC | AA  | -   | G    |     |     |     |      |      |    |   |    |    |    |   |   |
| Consensus                               | (5894) |            | TA     | G     | GA   | GT    | A     |       |       | AG     | C     | ATT  |     |      | C     | G     | A   | G   | T    |      | CC  | T    |        | CAG |     |     |     |       | TTGAA | A     | G      | AAAC |     | G    |     |     |      |     |     |     |      |      |    |   |    |    |    |   |   |
|                                         |        | Section 73 |        |       |      |       |       |       |       |        |       |      |     |      |       |       |     |     |      |      |     |      |        |     |     |     |     |       |       |       |        |      |     |      |     |     |      |     |     |     |      |      |    |   |    |    |    |   |   |
|                                         |        | (5977)     | 5977   | 5990  | 6000 | 6010  | 6020  | 6030  | 6040  | 6059   |       |      |     |      |       |       |     |     |      |      |     |      |        |     |     |     |     |       |       |       |        |      |     |      |     |     |      |     |     |     |      |      |    |   |    |    |    |   |   |
| K12 Zwischenstück 255.328 - 290.948     | (5865) | A          | TTT    | T     | CG   | G     | T     | G     | C     | G      | C     | C    | G   | C    | G     | C     | G   | G   | G    | T    | G   | AAAT | CA     | CG  | G   | G   | G   | T     | G     | AA    | GG     | CA   | AC  | T    | G   | CG  | CG   | GC  | AG  | C   | T    | C    | CT | G | T  | T  |    |   |   |
| SARS-CoV-2 Reference Genome NC_045512.2 | (3948) | A          | TGA    | TAA   | GA   | ----- | ----- | ----- | ----- | AAAT   | CA    | AAG  | CT  | TG   | T     | G     | AA  | GA  | AGT  | T    | CA  | AA   | CA     | AC  | T   | CT  | G   | GA    | AA    | CT    | A      | AG   | T   | T    | C   | CT  | CA   | -   |     |     |      |      |    |   |    |    |    |   |   |
| Consensus                               | (5977) |            | AT     | T     | G    |       |       |       |       | AAATCA | G     |      | TG  | G    | G     | A     | T   | C   |      | C    | A   | T    | C      | T   | G   | GA  |     | A     | T     | C     | CT     |      |     |      |     |     |      |     |     |     |      |      |    |   |    |    |    |   |   |
|                                         |        | Section 74 |        |       |      |       |       |       |       |        |       |      |     |      |       |       |     |     |      |      |     |      |        |     |     |     |     |       |       |       |        |      |     |      |     |     |      |     |     |     |      |      |    |   |    |    |    |   |   |
|                                         |        | (6060)     | 6060   | 6070  | 6080 | 6090  | 6100  | 6110  | 6120  | 6130   | 6142  |      |     |      |       |       |     |     |      |      |     |      |        |     |     |     |     |       |       |       |        |      |     |      |     |     |      |     |     |     |      |      |    |   |    |    |    |   |   |
| K12 Zwischenstück 255.328 - 290.948     | (5948) | G          | CC     | GAAA  | GG   | CA    | TT    | AAAA  | A     | G      | CG    | T    | G   | AC   | T     | G     | CA  | ATT | T    | C    | T   | CG   | GT     | GG  | T   | GA  | AG  | TC    | AT    | CC    | GC     | ATT  | -   | TG   | CA  | AC  | CT   | CGA | AG  | GC  | G    | AT   | A  | T | C  |    |    |   |   |
| SARS-CoV-2 Reference Genome NC_045512.2 | (4014) | -          | CAGAAA | AC--  | TT   | GT    | T     | A     | CT    | TT     | TATA  | T    | G   | AC   | ATT   | AAT   | T   | GG  | CA   | AT   | C   | T--- | TCAT   | CC  | AG  | ATT | C   | TG    | CA    | C     | T----- | CTT  | GT  | T    | AG  | T   |      |     |     |     |      |      |    |   |    |    |    |   |   |
| Consensus                               | (6060) |            | C      | GAAA  |      | TT    |       | A     |       | T      | T     | G    |     | ATT  |       | T     | GC  |     | T    |      |     |      | TCATCC |     | ATT | TGC | AC  |       |       |       |        | C    | G   | TA   |     |     |      |     |     |     |      |      |    |   |    |    |    |   |   |
|                                         |        | Section 75 |        |       |      |       |       |       |       |        |       |      |     |      |       |       |     |     |      |      |     |      |        |     |     |     |     |       |       |       |        |      |     |      |     |     |      |     |     |     |      |      |    |   |    |    |    |   |   |
|                                         |        | (6143)     | 6143   | 6150  | 6160 | 6170  | 6180  | 6190  | 6200  | 6210   | 6225  |      |     |      |       |       |     |     |      |      |     |      |        |     |     |     |     |       |       |       |        |      |     |      |     |     |      |     |     |     |      |      |    |   |    |    |    |   |   |
| K12 Zwischenstück 255.328 - 290.948     | (6030) | G          | CC     | CAC   | G    | G     | CG    | TC    | AG    | T      | CGT   | T    | AC  | AA   | CA    | GC    | GAT | GC  | ATT  | A    | CG  | CCG  | TAT    | T   | G   | CC  | GG  | AC    | ACC   | ACT   | CG     | CA   | AGA | AA   | T   | GA  | T    | GC  | AA  | -   | T    | ACT  | G  | - |    |    |    |   |   |
| SARS-CoV-2 Reference Genome NC_045512.2 | (4082) | G          | AC     | ATT   | G    | AC    | AT    | CA    | CT    | TT     | CT    | T    | T   | AA   | GA    | AA    | GAT | GC  | T    | CC   | A   | T    | A      | --- | TAT | AG  | T   | G     | GG    | TG    | AT     | G    | T   | G    | T   | CA  | AGA  | GGG | T   | G   | T    | T    | AA | C | T  | G  | CT | G | T |
| Consensus                               | (6143) |            | G      | C     |      | G     | C     | TCA   | T     |        | T     |      | AA  | A    |       | GATGC |     | A   |      |      |     | TAT  | G      |     | GG  |     | A   |       | CAAGA |       | TG     | T    | AA  | T    | CTG |     |      |     |     |     |      |      |    |   |    |    |    |   |   |
|                                         |        | Section 76 |        |       |      |       |       |       |       |        |       |      |     |      |       |       |     |     |      |      |     |      |        |     |     |     |     |       |       |       |        |      |     |      |     |     |      |     |     |     |      |      |    |   |    |    |    |   |   |
|                                         |        | (6226)     | 6226   | 6240  | 6250 | 6260  | 6270  | 6280  | 6290  | 6308   |       |      |     |      |       |       |     |     |      |      |     |      |        |     |     |     |     |       |       |       |        |      |     |      |     |     |      |     |     |     |      |      |    |   |    |    |    |   |   |
| K12 Zwischenstück 255.328 - 290.948     | (6111) | G          | G      | A     | TAT  | G     | AA    | TAC   | GG    | CC     | CG    | G    | TT  | GC   | CG    | TT    | CA  | CG  | T    | GA   | TGA | CA   | TG     | ATT | TA  | C   | --- | CG    | TTA   | AG    | G      | AG   | CAG | GC   | TG  | A   | TG   | CT  | GG  | A   | CA   | AA   | T  |   |    |    |    |   |   |
| SARS-CoV-2 Reference Genome NC_045512.2 | (4162) | G          | GT     | TAT   | ACC  | TAC   | T     | AAAA  | AG--  | G      | CT    | G    | TT  | GG   | T     | GG    | C   | ACT | TAC  | TGA  | A   | ATG  | C      | TAG | C   | G   | AA  | AG    | CT    | TT    | G      | AG   | AA  | AGT  | GC  | CA  | AC   | AG  | ACA | ATT | A    | T    | AT |   |    |    |    |   |   |
| Consensus                               | (6226) |            | GG     | TAT   |      | TAC   |       | G     |       | GC     | G     | T    | C   |      | T     |       | TGA | ATG | T    | C    |     |      | C      | TT  | AG  | A   |     | GC    | A     |       |        |      |     | A    | A   | AT  |      |     |     |     |      |      |    |   |    |    |    |   |   |
|                                         |        | Section 77 |        |       |      |       |       |       |       |        |       |      |     |      |       |       |     |     |      |      |     |      |        |     |     |     |     |       |       |       |        |      |     |      |     |     |      |     |     |     |      |      |    |   |    |    |    |   |   |
|                                         |        | (6309)     | 6309   | 6320  | 6330 | 6340  | 6350  | 6360  | 6370  | 6380   | 6391  |      |     |      |       |       |     |     |      |      |     |      |        |     |     |     |     |       |       |       |        |      |     |      |     |     |      |     |     |     |      |      |    |   |    |    |    |   |   |
| K12 Zwischenstück 255.328 - 290.948     | (6190) | G          | GG     | CAT   | T    | G     | CG    | CG    | AAG   | CA     | AG    | C    | CT  | C    | G     | T     | A   | TAA | AT   | TAG  | CG  | CA   | CT     | C   | T   | CC  | AG  | CC    | G     | CG    | AAAA   | AA   | A   | T    | CG  | C   | G    | GTG | CT  | GG  | AAAA | A    | A  | T | CG | CC | G  |   |   |
| SARS-CoV-2 Reference Genome NC_045512.2 | (4243) | A          | AC     | CA    | T    | T     | AC    | CG    | GGT   | CA     | GG    | ---  | GT  | T    | TAA   | AT    | GG  | T   | T    | CA   | -   | CT   | G      | TAG | AG  | G   | AG  | G     | GC    | AAA   | G      | ACA  | --- | GTG  | CT  | T   | AAAA | G   | T   | G   | T    | AAAA |    |   |    |    |    |   |   |
| Consensus                               | (6309) |            | CA     | T     |      | C     | CG    |       | CA    | G      |       |      | GT  |      | TAAAT |       | CA  | CT  | T    | AG   |     | G    | AAA    | A   | A   |     |     | GTGCT |       | AAAA  |        |      |     |      |     |     |      |     |     |     |      |      |    |   |    |    |    |   |   |

Sars-CoV-2 & E.coli K12 Zwischenstücke apr.apr

|                                                                                             |        |            |         |       |           |         |       |         |      |        |       |       |         |        |      |         |       |         |         |      |       |         |         |       |        |      |      |        |      |      |      |   |
|---------------------------------------------------------------------------------------------|--------|------------|---------|-------|-----------|---------|-------|---------|------|--------|-------|-------|---------|--------|------|---------|-------|---------|---------|------|-------|---------|---------|-------|--------|------|------|--------|------|------|------|---|
|                                                                                             |        | Section 78 |         |       |           |         |       |         |      |        |       |       |         |        |      |         |       |         |         |      |       |         |         |       |        |      |      |        |      |      |      |   |
| K12 Zwischenstück 255.328 - 290.948<br>SARS-CoV-2 Reference Genome NC 045512.2<br>Consensus | (6392) | 6392       | 6400    | 6410  | 6420      | 6430    | 6440  | 6450    | 6460 | 6474   |       |       |         |        |      |         |       |         |         |      |       |         |         |       |        |      |      |        |      |      |      |   |
|                                                                                             | (6273) | ATGAAC     | TGG     | AAGCA | CAAAGCGAA | ATCATC  | CTCAA | CGCTAA  | CGCC | CAGGAT | GTTC  | TGACG | C       | CGCAG  | C    | CAA     | TGGCC | TTAG    | GCGA    | A    |       |         |         |       |        |      |      |        |      |      |      |   |
|                                                                                             | (4317) | G          | TGCCT   | TTT   | ACATT     | CTACC   | ATCT  | ATATC   | TCT  | AA     | TGAG  | AA    | G---    | CA     | GAA  | TTCT    | TGAA  | C       | TGTTT   | CT-- | TGGAA | TTT     | GCGA    | -     |        |      |      |        |      |      |      |   |
|                                                                                             | (6392) | TG         | T       | A     | C         | A       | AT    | ATC     | AA   | G      | AA    | CA    | GA      | TT     | TG   | C       | C     | TGG     | TT      | GCGA |       |         |         |       |        |      |      |        |      |      |      |   |
|                                                                                             |        | Section 79 |         |       |           |         |       |         |      |        |       |       |         |        |      |         |       |         |         |      |       |         |         |       |        |      |      |        |      |      |      |   |
| K12 Zwischenstück 255.328 - 290.948<br>SARS-CoV-2 Reference Genome NC 045512.2<br>Consensus | (6475) | 6475       | 6480    | 6490  | 6500      | 6510    | 6520  | 6530    | 6540 | 6557   |       |       |         |        |      |         |       |         |         |      |       |         |         |       |        |      |      |        |      |      |      |   |
|                                                                                             | (6356) | GCGAT      | GCTTG   | ACCG  | TCTG      | CACTG   | ACG   | CGCG    | ACGG | CTG    | AAAG  | GG    | CA      | TG     | CC   | GACGA   | TGTAC | GT      | CAGGT   | TG   | CAAC  | CTCG    | CCGA    | A     |        |      |      |        |      |      |      |   |
|                                                                                             | (4394) | GAA        | ATGCTTG | CA    | CAT       | TGCA    | G     | A       | GAA  | AC     | ACG   | CA    | AA      | TTAA   | TG   | CCT     | GT    | CTG     | TG      | TG   | GAAAC | TAAA    | -       | GC    | CATAGT | TT   | CAAC | T----- | A    |      |      |   |
|                                                                                             | (6475) | G          | ATGCTTG | C     | T         | G       | A     | AC      | C    | C      | A     | TG    | G       | C      | TG   | GA      | T     | A       | G       | CA   | T     | CAAC    |         |       |        |      |      |        | A    |      |      |   |
|                                                                                             |        | Section 80 |         |       |           |         |       |         |      |        |       |       |         |        |      |         |       |         |         |      |       |         |         |       |        |      |      |        |      |      |      |   |
| K12 Zwischenstück 255.328 - 290.948<br>SARS-CoV-2 Reference Genome NC 045512.2<br>Consensus | (6558) | 6558       | 6570    | 6580  | 6590      | 6600    | 6610  | 6620    | 6630 | 6640   |       |       |         |        |      |         |       |         |         |      |       |         |         |       |        |      |      |        |      |      |      |   |
|                                                                                             | (6439) | TCCG       | GT      | GGGG  | CAGGT     | AAT     | CG    | AT      | GG   | C      | GCG   | TA    | CTGG    | ACA    | GCG  | G       | CC    | TG      | C       | GTC  | TTGA  | GCG     | T       | CGT   | CGCG   | TACC | GCT  | G      | GGG  | TTAT | T    | G |
|                                                                                             | (4470) | T          | AC      | G     | CG        | TA----- | AAT   | ATA     | AGG  | -      | G     | TAT   | TA      | AAAT   | ACA  | AG      | GG    | TG      | T       | GG-  | TTGA  | TTA     | T       | GGT   | -----  | GCT  | A    | G      | ATT  | TTAC | T    | T |
|                                                                                             | (6558) | T          | C       | G     | G         |         | AAT   | A       | GG   | G      |       | TA    |         | ACA    | G    | TG      | G     | TTGA    |         | T    | GT    |         |         |       |        | GCT  | G    |        | TTA  | T    |      |   |
|                                                                                             |        | Section 81 |         |       |           |         |       |         |      |        |       |       |         |        |      |         |       |         |         |      |       |         |         |       |        |      |      |        |      |      |      |   |
| K12 Zwischenstück 255.328 - 290.948<br>SARS-CoV-2 Reference Genome NC 045512.2<br>Consensus | (6641) | 6641       | 6650    | 6660  | 6670      | 6680    | 6690  | 6700    | 6710 | 6723   |       |       |         |        |      |         |       |         |         |      |       |         |         |       |        |      |      |        |      |      |      |   |
|                                                                                             | (6522) | GCG        | T       | GATTT | ATG       | AA      | GCGCG | CCCG    | AA   | CGT    | GAC   | GGT   | T       | GATGT  | CG   | CTT     | CG    | CTG     | TGC     | CTG  | AA    | ACC     | G       | GT    | AAT    | GCG  | GT   | G      | ATCC | TGC  | GC   |   |
|                                                                                             | (4537) | T--        | TACACC  | AGT   | AA        | AACAA   | CTGT  | A       | CGT  | CAC    | T     | TAT   | TA      | ACAC   | CA   | CTT     | AA    | CGAT    | T--     | CT   | AAAT  | ---     | GAA     | ACT   | C      | TT   | GT   | A      | CAA  | TGC  | CA   |   |
|                                                                                             | (6641) | T          |         | A     | AA        | C       | A     | CGT     | AC   | T      | A     | C     | CTT     | C      | T    | CT      | AA    | G       | A       | T    | GT    | A       | TGC     |       |        |      |      |        |      |      |      |   |
|                                                                                             |        | Section 82 |         |       |           |         |       |         |      |        |       |       |         |        |      |         |       |         |         |      |       |         |         |       |        |      |      |        |      |      |      |   |
| K12 Zwischenstück 255.328 - 290.948<br>SARS-CoV-2 Reference Genome NC 045512.2<br>Consensus | (6724) | 6724       | 6730    | 6740  | 6750      | 6760    | 6770  | 6780    | 6790 | 6806   |       |       |         |        |      |         |       |         |         |      |       |         |         |       |        |      |      |        |      |      |      |   |
|                                                                                             | (6605) | GG         | TGGC    | AA    | GA        | AAC     | GTG   | T       | CGC  | ACT    | AA    | CGCT  | CA      | ACG    | GT   | GC      | GGT   | GAT     | TC      | GG   | ACG   | C       | CTG     | AAA   | TCC    | TGC  | GGCT | TAC    | C    | G    | GGGG |   |
|                                                                                             | (4613) | CT         | TGGC    | T     | AT        | GT      | AAC   | ACAT    | T    | GC     | TTA   | AA    | TTTG    | GA     | GAAG | CT      | GCT   | CGG     | TAT     | T    | GAGAT | C       | CTC     | AAA   | G--    | TGC  | CAGC | TAC    | AGT  | ---- |      |   |
|                                                                                             | (6724) |            | TGGC    | A     | G         | AAC     | T     | GC      | AA   |        |       | G     | A       | G      | GC   | G       | T     | G       |         | C    | CT    | AAA     | TGC     |       |        |      | TAC  | G      |      |      |      |   |
|                                                                                             |        | Section 83 |         |       |           |         |       |         |      |        |       |       |         |        |      |         |       |         |         |      |       |         |         |       |        |      |      |        |      |      |      |   |
| K12 Zwischenstück 255.328 - 290.948<br>SARS-CoV-2 Reference Genome NC 045512.2<br>Consensus | (6807) | 6807       | 6820    | 6830  | 6840      | 6850    | 6860  | 6870    | 6889 |        |       |       |         |        |      |         |       |         |         |      |       |         |         |       |        |      |      |        |      |      |      |   |
|                                                                                             | (6688) | TGCG       | GT      | GCAGG | CGAT      | TGAT    | AA    | TCC     | T    | G-     | AC    | CGT   | GCGC    | TGGT   | CA   | GTGA    | AA    | TG      | CT      | G    | CGT   | TATGG   | ATAA    | AATAC | A      | TCG  | ACAT | GC     | T    | GAT  | C    |   |
|                                                                                             | (4690) | TTCT       | GT      | TTCTT | CACC      | TGAT    | GC    | TGT     | TAC  | AG     | CGT   | ATAA  | TGGT    | TATCTT | ACT  | T       | CT    | T       | CT      | T    | CT    | TAA     | AAC     | ACCTG | AAGA   | ACAT | TTT  | TAT    | T    | G    |      |   |
|                                                                                             | (6807) | T          | C       | GT    | C         | TGAT    | T     | T       | A    | CGT    |       | TGGT  | A       | A      | T    | CT      | C     | T       | T       | A    | A     | A       | ACAT    | T     | T      |      |      |        |      |      |      |   |
|                                                                                             |        | Section 84 |         |       |           |         |       |         |      |        |       |       |         |        |      |         |       |         |         |      |       |         |         |       |        |      |      |        |      |      |      |   |
| K12 Zwischenstück 255.328 - 290.948<br>SARS-CoV-2 Reference Genome NC 045512.2<br>Consensus | (6890) | 6890       | 6900    | 6910  | 6920      | 6930    | 6940  | 6950    | 6960 | 6972   |       |       |         |        |      |         |       |         |         |      |       |         |         |       |        |      |      |        |      |      |      |   |
|                                                                                             | (6770) | CCG        | CGTGG   | TGGC  | --        | GCTGGTT | TGC   | ATAAA   | CTG  | TG     | CCGTG | A     | ACAG    | T      | C    | GACAATC | CCGGT | GAT     | CACA    | GGT  | -     | GGTATAG | GCGT    | AT    | G      |      |      |        |      |      |      |   |
|                                                                                             | (4773) | AAA        | C       | CATC  | T         | CA      | CTT   | GCTGGTT | CCT  | ATAAA  | GAT   | TG    | GTCCT   | A      | TTT  | -       | TG    | GACAATC | TA----- | CACA | AC    | T       | GGTATAG | A---  | AT     | T    |      |        |      |      |      |   |
|                                                                                             | (6890) | C          | T       | C     | GCTGGTT   |         | ATAAA | TG      |      |        | A     | T     | GACAATC |        |      |         | CACA  | T       | GGTATAG |      |       | AT      |         |       |        |      |      |        |      |      |      |   |

Sars-CoV-2 & E.coli K12 Zwischenstück apr.apr

|                                         |        |                                                                                                                                                                       |      |      |      |      |      |      |      |      |      |
|-----------------------------------------|--------|-----------------------------------------------------------------------------------------------------------------------------------------------------------------------|------|------|------|------|------|------|------|------|------|
|                                         |        | Section 85                                                                                                                                                            |      |      |      |      |      |      |      |      |      |
|                                         |        | (6973)                                                                                                                                                                | 6973 | 6980 | 6990 | 7000 | 7010 | 7020 | 7030 | 7040 | 7055 |
| K12 Zwischenstück 255.328 - 290.948     | (6850) | C C A T A T T T A C G T T G A T G A A A G T G T A G A G A T C G C T G A A G C A T T A A A A G T G A T C G T C A A C G C G A A A A C T C A G C G T C C G A G C A C A T |      |      |      |      |      |      |      |      |      |
| SARS-CoV-2 Reference Genome NC_045512.2 | (4846) | T C T A A G A G A G G T G A T A A A A G T G T A T A T T A C A C T - - - - - A G T A A T C T A - - - - C C A C A T T C C A - - - - C C T A G A T G G T                 |      |      |      |      |      |      |      |      |      |
| Consensus                               | (6973) | C T A G T G A T A A A G T G T A A C C T - - - - - A G T A T C T C A A C A C A C C A G T                                                                               |      |      |      |      |      |      |      |      |      |
|                                         |        | Section 86                                                                                                                                                            |      |      |      |      |      |      |      |      |      |
|                                         |        | (7056)                                                                                                                                                                | 7056 | 7070 | 7080 | 7090 | 7100 | 7110 | 7120 | 7138 |      |
| K12 Zwischenstück 255.328 - 290.948     | (6933) | G T A A T A C G G T T G A A A G C T T G C T G G T G A A T A A A A A C A T C G C C G A T A G C T T C C T G C C C G C A T T A A G C A A A C A A A T G G C G G A A A G C |      |      |      |      |      |      |      |      |      |
| SARS-CoV-2 Reference Genome NC_045512.2 | (4910) | G A A - - - - G T T A T C A C C T T - - - G A C A A T C T T A A G A - C A C T T C T T T C T T - - T G A G A G A A G T G A G G A C T A T T A A G G T G T T T A C A     |      |      |      |      |      |      |      |      |      |
| Consensus                               | (7056) | G A G T T A C T T G A A T A A A C C T C T T T G G A T A G A A G G A A G G G A                                                                                         |      |      |      |      |      |      |      |      |      |
|                                         |        | Section 87                                                                                                                                                            |      |      |      |      |      |      |      |      |      |
|                                         |        | (7139)                                                                                                                                                                | 7139 | 7150 | 7160 | 7170 | 7180 | 7190 | 7200 | 7210 | 7221 |
| K12 Zwischenstück 255.328 - 290.948     | (7016) | G G C G T G A C A T T A C A C G C A G A T G C A G C T G C A C T G C G C A G T T G C A G G C A G C C C T G C G A A G G T G G T T G C T G T T A A A G C C G A A G A     |      |      |      |      |      |      |      |      |      |
| SARS-CoV-2 Reference Genome NC_045512.2 | (4982) | - - - - - A C A G T A G A C A - A C A T T A A C C T C C A C A C G C A - A G T T G T G A C A T G T C A A T G A C A T A T G G A C A A C A G T T T G T C C A A C T       |      |      |      |      |      |      |      |      |      |
| Consensus                               | (7139) | A C A T A A C A A T A C T C A C G C A G T T G G C A G C C A T G G T T G C A A                                                                                         |      |      |      |      |      |      |      |      |      |
|                                         |        | Section 88                                                                                                                                                            |      |      |      |      |      |      |      |      |      |
|                                         |        | (7222)                                                                                                                                                                | 7222 | 7230 | 7240 | 7250 | 7260 | 7270 | 7280 | 7290 | 7304 |
| K12 Zwischenstück 255.328 - 290.948     | (7099) | G T A T G A C G A T G - A G T T T C T G T C A T T A G A T T T G A A C G T C A A A A T C G T C A G C G A T C T T G A C G A T G C C A T C G C C C A T A T T C G T G A A |      |      |      |      |      |      |      |      |      |
| SARS-CoV-2 Reference Genome NC_045512.2 | (5057) | - T A T T T G G A T G G A G C T G A T G T A C T A A A A T A A A A C T C A T A A T T C A T G A A G G T A A A A C A T T T T A T G T - - - - T T T A C C T A A T         |      |      |      |      |      |      |      |      |      |
| Consensus                               | (7222) | T A T G A T G A G T T G T A T A A T A A C T C A A A T C A A T A A T A T A T A T T T C T A                                                                             |      |      |      |      |      |      |      |      |      |
|                                         |        | Section 89                                                                                                                                                            |      |      |      |      |      |      |      |      |      |
|                                         |        | (7305)                                                                                                                                                                | 7305 | 7310 | 7320 | 7330 | 7340 | 7350 | 7360 | 7370 | 7387 |
| K12 Zwischenstück 255.328 - 290.948     | (7181) | C A C G G C A C A C A C A C T C C G A T G C G A T C C T G A C C G C G A T A T G C G C A A C - G C C A G C G T T T T T G T T A A C G A A G T G G A T T C G T C C G     |      |      |      |      |      |      |      |      |      |
| SARS-CoV-2 Reference Genome NC_045512.2 | (5135) | G A T G A C A C T C T A C G T G T T G A G G C T T T T G A G T A C A C A C A - - - - C A A C T G A T C T A G T T T T C T - - - - - G G G T A G G T A C A               |      |      |      |      |      |      |      |      |      |
| Consensus                               | (7305) | A G C A C C A C G A G C T G C C A A C A A C A A C A A C G C G T T T T T G G T G T C                                                                                   |      |      |      |      |      |      |      |      |      |
|                                         |        | Section 90                                                                                                                                                            |      |      |      |      |      |      |      |      |      |
|                                         |        | (7388)                                                                                                                                                                | 7388 | 7400 | 7410 | 7420 | 7430 | 7440 | 7450 | 7460 | 7470 |
| K12 Zwischenstück 255.328 - 290.948     | (7263) | C T G T T T A C G T T A A C G C - C T C T A C G C G T T T T A C C G A C G G C G G C C A G T T - - T G G T C T G G G T G C G - - G A A G T G G C G G T A A G C A C A C |      |      |      |      |      |      |      |      |      |
| SARS-CoV-2 Reference Genome NC_045512.2 | (5205) | - T G T C A G C A T T A A A T C A C A C T A A A A A G T G G A A A T A C - - C C A C A A G T T A A T G G T T T A A C T T C T A T T A A A T G G - - - - - G C A G A T   |      |      |      |      |      |      |      |      |      |
| Consensus                               | (7388) | T G T C T T A A C C C T A T A A C C C A G T T T G G T T T C A A T G G G C A A T G G G C A A                                                                           |      |      |      |      |      |      |      |      |      |
|                                         |        | Section 91                                                                                                                                                            |      |      |      |      |      |      |      |      |      |
|                                         |        | (7471)                                                                                                                                                                | 7471 | 7480 | 7490 | 7500 | 7510 | 7520 | 7530 | 7540 | 7553 |
| K12 Zwischenstück 255.328 - 290.948     | (7341) | A A A A A C T C C A C G C G C T G G C C C A A T G G G G C T G G A A G C A C T G A C C A C T T A C A A G T G G A T C G G C A T T G G T G A T T A C C A T T C G T       |      |      |      |      |      |      |      |      |      |
| SARS-CoV-2 Reference Genome NC_045512.2 | (5279) | A A C A A C T G T T A T C T T G - - - - C C A C T G C A T - T G T T A C A C T - - C C A - - - A C A A T A G A G - - - - - T T G A A G T T A A T C C A - - C C T       |      |      |      |      |      |      |      |      |      |
| Consensus                               | (7471) | A A A A C T C G C C A T G T G A A C A C T C C A A C A A T G A T T G G T T A C C A C T                                                                                 |      |      |      |      |      |      |      |      |      |

Sars-CoV-2 & E.coli K12 Zwischenstück.eapr.apr

|                                         |        |            |      |       |      |      |      |       |      |       |      |        |       |       |      |      |     |      |      |     |      |       |     |      |      |       |     |     |     |     |     |      |     |      |     |     |     |     |     |     |     |     |     |     |     |     |     |
|-----------------------------------------|--------|------------|------|-------|------|------|------|-------|------|-------|------|--------|-------|-------|------|------|-----|------|------|-----|------|-------|-----|------|------|-------|-----|-----|-----|-----|-----|------|-----|------|-----|-----|-----|-----|-----|-----|-----|-----|-----|-----|-----|-----|-----|
|                                         |        | Section 92 |      |       |      |      |      |       |      |       |      |        |       |       |      |      |     |      |      |     |      |       |     |      |      |       |     |     |     |     |     |      |     |      |     |     |     |     |     |     |     |     |     |     |     |     |     |
|                                         |        | (7554)     | 7554 | 7560  | 7570 | 7580 | 7590 | 7600  | 7610 | 7620  | 7636 |        |       |       |      |      |     |      |      |     |      |       |     |      |      |       |     |     |     |     |     |      |     |      |     |     |     |     |     |     |     |     |     |     |     |     |     |
| K12 Zwischenstück 255.328 - 290.948     | (7424) | GC         | GTAA | TA    | AA   | CCGG | GGT  | GAT   | GCAA | AAG   | TA   | GCCATT | TGATT | CAC   | AA   | GGC  | CAT | TGAC | GCAT | C   | GCCC | GGT   | AG  | TTTT | AAC  | CTT   | GT  |     |     |     |     |      |     |      |     |     |     |     |     |     |     |     |     |     |     |     |     |
| SARS-CoV-2 Reference Genome NC_045512.2 | (5345) | GC         | TC   | ---   | TAC  | AA   | GAT  | GCT   | TAT  | TAC   | AG   | AG     | CA    | ----- | AG   | GGC  | TGG | TGA  | GC   | TG  | C    | ----- | TA  | AC   | TTTT | ----- | GT  |     |     |     |     |      |     |      |     |     |     |     |     |     |     |     |     |     |     |     |     |
| Consensus                               | (7554) | GC         |      |       | TA   | AA   | G    | T     | AT   | A     | AG   | A      |       |       | A    | GGC  | TGA | GC   | C    |     |      | T     | A   | TTTT |      | GT    |     |     |     |     |     |      |     |      |     |     |     |     |     |     |     |     |     |     |     |     |     |
|                                         |        | Section 93 |      |       |      |      |      |       |      |       |      |        |       |       |      |      |     |      |      |     |      |       |     |      |      |       |     |     |     |     |     |      |     |      |     |     |     |     |     |     |     |     |     |     |     |     |     |
|                                         |        | (7637)     | 7637 | 7650  | 7660 | 7670 | 7680 | 7690  | 7700 | 7719  |      |        |       |       |      |      |     |      |      |     |      |       |     |      |      |       |     |     |     |     |     |      |     |      |     |     |     |     |     |     |     |     |     |     |     |     |     |
| K12 Zwischenstück 255.328 - 290.948     | (7507) | C          | CAC  | CGTGA | TT   | CA   | GGT  | CTG   | GA   | AA    | CAT  | GT     | CT    | CT    | TC   | AGG  | GCC | GAT  | TA   | TAG | CT   | CA    | GT  | TGG  | TAG  | AG    | C   | AG  | CGC | ATT | CGT | AATG | CGA | AG   | G   |     |     |     |     |     |     |     |     |     |     |     |     |
| SARS-CoV-2 Reference Genome NC_045512.2 | (5399) | G          | CAC  | TTATC | TT   | AG   | CT   | AG    | CT   | GT    | AA   | TA     | AG    | AC    | AG   | T    | --- | AGG  | T    | --- | AG   | GT    | TAG | G    | TGA  | ---   | TG  | TAG | AG  | AA  | C   | ---  | --- | AATG | --- | AG  | T   |     |     |     |     |     |     |     |     |     |     |
| Consensus                               | (7637) | CAC        |      |       | TT   |      | C    | T     | C    |       | AA   | A      | G     | C     | T    |      | AGG |      | GA   |     | TAG  | T     | A   | TG   | TAG  | AG    | A   | C   |     |     |     | AATG |     | AG   |     |     |     |     |     |     |     |     |     |     |     |     |     |
|                                         |        | Section 94 |      |       |      |      |      |       |      |       |      |        |       |       |      |      |     |      |      |     |      |       |     |      |      |       |     |     |     |     |     |      |     |      |     |     |     |     |     |     |     |     |     |     |     |     |     |
|                                         |        | (7720)     | 7720 | 7730  | 7740 | 7750 | 7760 | 7770  | 7780 | 7790  | 7802 |        |       |       |      |      |     |      |      |     |      |       |     |      |      |       |     |     |     |     |     |      |     |      |     |     |     |     |     |     |     |     |     |     |     |     |     |
| K12 Zwischenstück 255.328 - 290.948     | (7590) | T          | CGT  | TAG   | GG   | TTC  | GAC  | ---   | TC   | TAT   | TAT  | CG     | GCA   | C     | CATT | AAAA | TC  | AAA  | TTG  | TT  | ACGT | AAG   | AT  | CT   | TT   | AT    | CT  | TCC | --- | CAC | CA  | AAA  | AA  | TT   | A   |     |     |     |     |     |     |     |     |     |     |     |     |
| SARS-CoV-2 Reference Genome NC_045512.2 | (5465) | T          | AC   | T     | T    | G    | TTC  | AC    | T    | C     | A    | T      | T     | G     | C    | AAAA |     |      | TTG  |     | ACGT | GGT   | G   | T    | T    | A     | TT  | T   | CA  | CA  | A   | A    | A   | A    |     |     |     |     |     |     |     |     |     |     |     |     |     |
| Consensus                               | (7720) | T          |      | T     | G    | TTC  | AC   | T     | C    | A     | T    | T      | G     | C     |      | AAAA |     |      | TTG  |     | ACGT |       | T   | T    | A    | TT    | T   |     | CA  | CA  | A   | A    | A   | A    |     |     |     |     |     |     |     |     |     |     |     |     |     |
|                                         |        | Section 95 |      |       |      |      |      |       |      |       |      |        |       |       |      |      |     |      |      |     |      |       |     |      |      |       |     |     |     |     |     |      |     |      |     |     |     |     |     |     |     |     |     |     |     |     |     |
|                                         |        | (7803)     | 7803 | 7810  | 7820 | 7830 | 7840 | 7850  | 7860 | 7870  | 7885 |        |       |       |      |      |     |      |      |     |      |       |     |      |      |       |     |     |     |     |     |      |     |      |     |     |     |     |     |     |     |     |     |     |     |     |     |
| K12 Zwischenstück 255.328 - 290.948     | (7671) | T          | CT   | T     | A    | T    | G    | T     | A    | A     | C    | A      | G     | CT    | GGT  | GTA  | AG  | T    | A    | A   | AT   | TC    | TAT | CA   | AC   | G     | A   | AG  | AT  | CA  | AT  | CTT  | A   | TCT  | AC  | TG  | AC  | CA  | AAA | AGG | CCT | GAT | AGG | GCT | TTC |     |     |
| SARS-CoV-2 Reference Genome NC_045512.2 | (5547) | C          | CT   | T     | A    | A    | G    | ---   | ---  | ---   | ---  | ---    | ---   | ---   | GGT  | GTA  | --- | GA   | AG   | CT  | GT   | TAT   | GT  | AC   | ---  | AT    | GG  | CA  | CA  | CTT | --- | TCT  | TA  | TGA  | CA  | AA  | TTT | AA  | --- | GA  | AGG | TG  | TTC |     |     |     |     |
| Consensus                               | (7803) | C          | T    | A     | G    |      |      |       |      |       |      |        |       |       | GGT  | GTA  | G   | A    | T    |     | TAT  |       | AC  | A    | G    |       | CA  | CTT | TCT | TGA | CAA |      |     |      |     |     |     | GA  | AGG |     | TTC |     |     |     |     |     |     |
|                                         |        | Section 96 |      |       |      |      |      |       |      |       |      |        |       |       |      |      |     |      |      |     |      |       |     |      |      |       |     |     |     |     |     |      |     |      |     |     |     |     |     |     |     |     |     |     |     |     |     |
|                                         |        | (7886)     | 7886 | 7900  | 7910 | 7920 | 7930 | 7940  | 7950 | 7968  |      |        |       |       |      |      |     |      |      |     |      |       |     |      |      |       |     |     |     |     |     |      |     |      |     |     |     |     |     |     |     |     |     |     |     |     |     |
| K12 Zwischenstück 255.328 - 290.948     | (7754) | G          | CT   | CA    | CT   | A    | T    | A     | C    | T     | CT   | TGG    | G     | TG    | CA   | GGT  | T   | T    | A    | G   | T    | T     | G   | ---  | TACA | CC    | A   | CTC | CTA | A   | A   | T    | T   | T    | A   | A   | T   | G   | T   | G   | T   | CA  | AT  | AA  | G   | CTC |     |
| SARS-CoV-2 Reference Genome NC_045512.2 | (5616) | ---        | ---  | ---   | AG   | AT   | AC   | CT    | T    | GT    | AG   | CT     | GT    | GGT   | AAA  | CA   | AG  | CT   | TACA | AAA | AT   | TAT   | CTA | G    | TACA | AA    | CA  | G   | G   | AG  | T   | C    | CT  | T    | T   | GT  | --- | AT  | G   | AT  | G   | TCA |     |     |     |     |     |
| Consensus                               | (7886) |            |      |       | A    | A    | A    | C     | T    |       | C    |        |       | GGT   | A    |      | G   | TACA | A    |     | CTA  |       | A   | G    |      | T     | C   | T   | T   | GT  |     | AT   | G   | AT   | G   | TCA |     |     |     |     |     |     |     |     |     |     |     |
|                                         |        | Section 97 |      |       |      |      |      |       |      |       |      |        |       |       |      |      |     |      |      |     |      |       |     |      |      |       |     |     |     |     |     |      |     |      |     |     |     |     |     |     |     |     |     |     |     |     |     |
|                                         |        | (7969)     | 7969 | 7980  | 7990 | 8000 | 8010 | 8020  | 8030 | 8040  | 8051 |        |       |       |      |      |     |      |      |     |      |       |     |      |      |       |     |     |     |     |     |      |     |      |     |     |     |     |     |     |     |     |     |     |     |     |     |
| K12 Zwischenstück 255.328 - 290.948     | (7836) | G          | A    | AC    | AA   | AT   | T    | A     | G    | CT    | CA   | T      | T     | AT    | G    | A    | T   | T    | CA   | CT  | T    | GG    | T   | T    | AA   | T     | A   | CT  | T   | CT  | GG  | T    | TG  | CAT  | GAT | TG  | T   | T   | GT  | CC  | GT  | AAA | AG  | AT  | AA  | G   | CTC |
| SARS-CoV-2 Reference Genome NC_045512.2 | (5690) | G          | C    | AC    | ACC  | T    | ---  | GCTCA | AT   | TAT   | G    | A      | CT    | ---   | TTAA | G    | CA  | T    | GGT  | AC  | AT   | T     | TAC | TTG  | ---  | ---   | --- | TG  | C   | T   | AGT | G    | A   | GT   | AC  | ACT | G   | TAA | --- | --- | --- | --- | --- | --- | --- | --- |     |
| Consensus                               | (7969) | G          | AC   | A     |      | T    |      | GCTCA |      | TATGA |      | C      |       | TTAA  |      | T    |     | AC   | T    | T   | TTG  |       |     |      |      |       | TG  | T   | GT  | GTA | A   | G    | TAA |      |     |     |     |     |     |     |     |     |     |     |     |     |     |
|                                         |        | Section 98 |      |       |      |      |      |       |      |       |      |        |       |       |      |      |     |      |      |     |      |       |     |      |      |       |     |     |     |     |     |      |     |      |     |     |     |     |     |     |     |     |     |     |     |     |     |
|                                         |        | (8052)     | 8052 | 8060  | 8070 | 8080 | 8090 | 8100  | 8110 | 8120  | 8134 |        |       |       |      |      |     |      |      |     |      |       |     |      |      |       |     |     |     |     |     |      |     |      |     |     |     |     |     |     |     |     |     |     |     |     |     |
| K12 Zwischenstück 255.328 - 290.948     | (7919) | C          | GGG  | T     | AGT  | AG   | CAG  | G     | CG   | CA    | T    | T      | A     | CGC   | AA   | T    | AGG | TAA  | ACA  | AGG | G    | AG    | TT  | C    | AG   | AA    | TG  | T   | AA  | AT  | CG  | GGA  | AGG | TT   | --- | G   | TAC | GC  | AA  | T   | G   |     |     |     |     |     |     |
| SARS-CoV-2 Reference Genome NC_045512.2 | (5756) | ---        | ---  | ---   | TA   | CC   | AG   | TGT   | GT   | CA    | CTA  | TA     | ---   | AA    | CA   | TA   | TAA | CTT  | CTAA | AG  | AA   | CTT   | T   | ---  | ---  | ---   | --- | --- | --- | --- | --- | ---  | --- | ---  | --- | --- | --- | --- | --- | --- | --- | --- | --- | --- | --- | --- |     |
| Consensus                               | (8052) |            |      |       | TA   | AG   |      | G     | CA   | TA    |      | AA     | A     | TAA   |      |      |     |      | AG   | AA  | TT   |       |     |      | G    | A     | TG  | A   | A   | GG  |     | TT   |     |      | TAC | A   | T   |     |     |     |     |     |     |     |     |     |     |

Sars-CoV-2 & E.coli K12 Zwischenstück.epr.apr

|                                         |        |             |      |       |      |       |      |       |        |        |         |       |      |       |       |      |       |       |      |       |       |       |       |       |      |       |     |       |      |      |       |      |     |      |     |     |    |     |      |   |   |
|-----------------------------------------|--------|-------------|------|-------|------|-------|------|-------|--------|--------|---------|-------|------|-------|-------|------|-------|-------|------|-------|-------|-------|-------|-------|------|-------|-----|-------|------|------|-------|------|-----|------|-----|-----|----|-----|------|---|---|
|                                         |        | Section 99  |      |       |      |       |      |       |        |        |         |       |      |       |       |      |       |       |      |       |       |       |       |       |      |       |     |       |      |      |       |      |     |      |     |     |    |     |      |   |   |
|                                         |        | (8135)      | 8135 | 8140  | 8150 | 8160  | 8170 | 8180  | 8190   | 8200   | 8217    |       |      |       |       |      |       |       |      |       |       |       |       |       |      |       |     |       |      |      |       |      |     |      |     |     |    |     |      |   |   |
| K12 Zwischenstück 255.328 - 290.948     | (8000) | T           | TCA  | TCG   | TAC  | TAC   | GT   | TG--- | TTACGG | CT     | TTGCCGC | AAC   | AAG  | CC    | AGTT  | GCC  | TG    | CCGCG | CTCG | CAG   | AAT   | GTC   | GCAG  | C     | CCGG | AGA   |     |       |      |      |       |      |     |      |     |     |    |     |      |   |   |
| SARS-CoV-2 Reference Genome NC_045512.2 | (5833) | C           | TCA  | GAA   | TAC  | AA    | AG   | GT    | CTTA   | TTACGG | AT      | TTTCT | ACA  | AAG   | AA    | ACAG | T     | TAC   | ACAA | CAAC  | CAT   | AAA   | AC    | CAG   | TTA  | CTTAT | AAA |       |      |      |       |      |     |      |     |     |    |     |      |   |   |
| Consensus                               | (8135) |             | TCA  |       | TAC  | A     | G    | T     |        | TTACGG | T       | T     |      | A     | AAG   | A    | G     | T     | C    |       | C     | CA    | AA    | C     | G    | C     | A   | A     |      |      |       |      |     |      |     |     |    |     |      |   |   |
|                                         |        | Section 100 |      |       |      |       |      |       |        |        |         |       |      |       |       |      |       |       |      |       |       |       |       |       |      |       |     |       |      |      |       |      |     |      |     |     |    |     |      |   |   |
|                                         |        | (8218)      | 8218 | 8230  | 8240 | 8250  | 8260 | 8270  | 8280   | 8290   | 8300    |       |      |       |       |      |       |       |      |       |       |       |       |       |      |       |     |       |      |      |       |      |     |      |     |     |    |     |      |   |   |
| K12 Zwischenstück 255.328 - 290.948     | (8080) | T           | TAA  | GGA   | GAT  | TGTT  | CC   | TGCC  | AGCT   | AAAT   | CCCTTCC | TG    | T    | GAT   | TA    | CGA  | ACC   | AG    | CT   | CG    | TATT  | TTTC  | TACCA | GAAA  | ATT  | CACGG | CAT | C     |      |      |       |      |     |      |     |     |    |     |      |   |   |
| SARS-CoV-2 Reference Genome NC_045512.2 | (5915) | TT          | GGA  | TGG   | TGTT | GT    | TGT  | ACAG  | AAAT   | -----  | TG      | ACC   | TA   | ----- | AG    | TG   | GACAA | TTAT  | TATA | AGAAA | GA    | CA    | ATT   | CTTA  |      |       |     |       |      |      |       |      |     |      |     |     |    |     |      |   |   |
| Consensus                               | (8218) |             | T    | GGA   |      | TGTT  | T    | A     | AAAT   |        |         | TG    | C    | TA    |       | AG   | T     | G     |      | TT    | TA    | AGAAA | CA    | C     | T    |       |     |       |      |      |       |      |     |      |     |     |    |     |      |   |   |
|                                         |        | Section 101 |      |       |      |       |      |       |        |        |         |       |      |       |       |      |       |       |      |       |       |       |       |       |      |       |     |       |      |      |       |      |     |      |     |     |    |     |      |   |   |
|                                         |        | (8301)      | 8301 | 8310  | 8320 | 8330  | 8340 | 8350  | 8360   | 8370   | 8383    |       |      |       |       |      |       |       |      |       |       |       |       |       |      |       |     |       |      |      |       |      |     |      |     |     |    |     |      |   |   |
| K12 Zwischenstück 255.328 - 290.948     | (8163) | GGCT        | AGG  | GT    | GAT  | ACC   | GGC  | AT    | C      | GAT    | G       | TGT   | TC   | TTAA  | T     | CAC  | AG    | CC    | T    | CAT   | TG    | CAG   | AAT   | GGC   | G    | TG    | TCG | T     | TATT | G    | T     | C    | AG  | ACCA | TAG | T   |    |     |      |   |   |
| SARS-CoV-2 Reference Genome NC_045512.2 | (5983) | TTTC        | ACA  | G     | A    | G     | CA   | ACC   | A      | AT     | GAT     | CT    | TG   | T     | AC    | CA   | AA    | CA    | ACC  | ATA   | TC    | CA    | A     | CGCAA | G    | CT    | TCG | TA    | ATT  | T    | AAG   | TTTG | TA  | T    |     |     |    |     |      |   |   |
| Consensus                               | (8301) |             | A    | G     | G    | ACC   |      | AT    | GAT    | T      | T       | C     | AA   | CA    | A     | C    | T     |       | T    | CA    | A     | G     | TCG   | T     | ATT  | T     | AG  |       | TA   | T    |       |      |     |      |     |     |    |     |      |   |   |
|                                         |        | Section 102 |      |       |      |       |      |       |        |        |         |       |      |       |       |      |       |       |      |       |       |       |       |       |      |       |     |       |      |      |       |      |     |      |     |     |    |     |      |   |   |
|                                         |        | (8384)      | 8384 | 8390  | 8400 | 8410  | 8420 | 8430  | 8440   | 8450   | 8466    |       |      |       |       |      |       |       |      |       |       |       |       |       |      |       |     |       |      |      |       |      |     |      |     |     |    |     |      |   |   |
| K12 Zwischenstück 255.328 - 290.948     | (8246) | G           | CTG  | T     | TCC  | AG    | CAG  | A     | CG     | TG     | TCAG    | T     | A    | CA    | TTTG  | CCAG | AC    | AGCC  | AC   | G     | GGT   | G     | AC    | AG    | GC   | AGGG  | CTT | CACCG | CCC  | GCT  | GAG   | T    | T   | ATT  | GCA |     |    |     |      |   |   |
| SARS-CoV-2 Reference Genome NC_045512.2 | (6060) | G           | TGAT | TAATA | AT   | CAAA  | TT   | TC    | GAT    | TGA    | TTT     | AAA   | CCAG | TTA   | ---   | ACT  | GGT   | TAT   | AAG  | AA    | ----- | CCT   | GCT   | ---   | TCA  | AGAGA | A   |       |      |      |       |      |     |      |     |     |    |     |      |   |   |
| Consensus                               | (8384) |             | G    |       | T    | A     | CA   | A     | TG     |        | T       | A     | T    | CCAG  | A     | AC   | GGT   | A     | A    | G     | A     |       | CC    | GCT   |      | T     | A   | A     |      |      |       |      |     |      |     |     |    |     |      |   |   |
|                                         |        | Section 103 |      |       |      |       |      |       |        |        |         |       |      |       |       |      |       |       |      |       |       |       |       |       |      |       |     |       |      |      |       |      |     |      |     |     |    |     |      |   |   |
|                                         |        | (8467)      | 8467 | 8480  | 8490 | 8500  | 8510 | 8520  | 8530   | 8549   |         |       |      |       |       |      |       |       |      |       |       |       |       |       |      |       |     |       |      |      |       |      |     |      |     |     |    |     |      |   |   |
| K12 Zwischenstück 255.328 - 290.948     | (8329) | G           | G    | T     | AAA  | G     | T    | T     | CAT    | G      | TTT     | G     | CT   | CGT   | G     | T    | AGG   | TAA   | T    | TAA   | C     | G     | T     | G     | G    | TAA   | --- | AT    | GGCG | AT   | G     | T    | A   | C    | G   | T   | AG | CCG | CAAC | T | G |
| SARS-CoV-2 Reference Genome NC_045512.2 | (6127) | G           | CTT  | AAA   | AG   | TT    | CAT  | TTT   | CG     | CT     | G       | ---   | ACT  | TAA   | T     | GGT  | GAT   | G     | T    | G     | GG    | T     | GG    | C     | T    | ATT   | GAT | TATA  | AA   | ACAC | TACAC | AC   | CC  | T    | TTT | TAA |    |     |      |   |   |
| Consensus                               | (8467) |             | G    | T     | AA   |       | TT   | CAT   | TTT    | C      | CT      |       | A    | TAA   | T     | G    | TG    | G     |      | GG    | TA    |       | AT    |       | A    |       | TAC | A     | CC   | C    |       |      |     |      |     |     |    |     |      |   |   |
|                                         |        | Section 104 |      |       |      |       |      |       |        |        |         |       |      |       |       |      |       |       |      |       |       |       |       |       |      |       |     |       |      |      |       |      |     |      |     |     |    |     |      |   |   |
|                                         |        | (8550)      | 8550 | 8560  | 8570 | 8580  | 8590 | 8600  | 8610   | 8620   | 8632    |       |      |       |       |      |       |       |      |       |       |       |       |       |      |       |     |       |      |      |       |      |     |      |     |     |    |     |      |   |   |
| K12 Zwischenstück 255.328 - 290.948     | (8410) | C           | AA   | G     | GG   | T     | G    | TCGGC | TT     | CGCA   | GG      | T     | AAA  | ATCG  | TTGT  | GGTA | CAG   | GG    | TAAC | GC    | AG    | TG    | GGCAT | TGGT  | GGGG | GGC   | T   | GAG   | TT   | C    | ACC   | GG   | --- |      |     |     |    |     |      |   |   |
| SARS-CoV-2 Reference Genome NC_045512.2 | (6205) | G           | AA   | AGG   | AG   | CTAAA | TT   | GTTA  | CA     | T      | AAA     | CCTA  | TTGT | TTGG  | CAT   | G    | T     | TAAC  | ---  | ATG   | CAAC  | TAA   | TAAA  | G     | C    | C     | G   | T     | AA   | ACC  | AA    | ATAC |     |      |     |     |    |     |      |   |   |
| Consensus                               | (8550) |             | AA   | GG    | G    |       | TT   | A     | T      | AA     |         | TTGT  |      | CA    | G     | TAAC | A     | TG    |      | T     | T     | G     | C     | G     | T    | ACC   |     |       |      |      |       |      |     |      |     |     |    |     |      |   |   |
|                                         |        | Section 105 |      |       |      |       |      |       |        |        |         |       |      |       |       |      |       |       |      |       |       |       |       |       |      |       |     |       |      |      |       |      |     |      |     |     |    |     |      |   |   |
|                                         |        | (8633)      | 8633 | 8640  | 8650 | 8660  | 8670 | 8680  | 8690   | 8700   | 8715    |       |      |       |       |      |       |       |      |       |       |       |       |       |      |       |     |       |      |      |       |      |     |      |     |     |    |     |      |   |   |
| K12 Zwischenstück 255.328 - 290.948     | (8488) | -           | TGGT | CA    | GC   | AT    | CGA  | TT    | CCA    | T      | CTGGAG  | GAT   | AAA  | GTGC  | GGGAA | TG   | TTT   | CATC  | CA   | GC    | T     | TCCGG | CA    | TT    | C    | GAT   | GT  | C     | ACT  | GAA  | C     | T    | GG  | C    |     |     |    |     |      |   |   |
| SARS-CoV-2 Reference Genome NC_045512.2 | (6286) | C           | TGGT | ---   | G    | T     | AT   | ACG   | TT     | GTC    | T       | TGGAG | CA   | AAA   | ACCA  | G    | T     | ---   | TG   | AAA   | CATC  | AA    | T     | ---   | C    | G     | TT  | GAT   | GT   | ---  | ACT   | GAA  | G   | T    | --- | C   |    |     |      |   |   |
| Consensus                               | (8633) |             | TGGT |       | G    | AT    |      | TT    |        | T      | TGGAG   | A     | AAA  |       | G     |      | TG    |       | CATC | A     | T     |       | C     | TT    | GAT  | GT    |     | ACT   | GAA  | T    |       |      |     |      |     |     |    |     |      |   |   |

Sars-CoV-2 & E.coli K12 Zwischenstück.epr.apr

|                                         |        |             |      |      |      |      |      |      |      |      |      |
|-----------------------------------------|--------|-------------|------|------|------|------|------|------|------|------|------|
|                                         |        | Section 106 |      |      |      |      |      |      |      |      |      |
|                                         |        | (8716)      | 8716 | 8730 | 8740 | 8750 | 8760 | 8770 | 8780 | 8798 |      |
| K12 Zwischenstück 255.328 - 290.948     | (8570) | G           | G    | T    | G    | A    | T    | G    | C    | C    | G    |
| SARS-CoV-2 Reference Genome NC_045512.2 | (6356) | G           | A    | G    | A    | C    | G    | C    | G    | A    | T    |
| Consensus                               | (8716) | G           | G    | A    | G    | C    | G    | C    | G    | A    | T    |
|                                         |        | Section 107 |      |      |      |      |      |      |      |      |      |
|                                         |        | (8799)      | 8799 | 8810 | 8820 | 8830 | 8840 | 8850 | 8860 | 8870 | 8881 |
| K12 Zwischenstück 255.328 - 290.948     | (8653) | G           | C    | T    | G    | C    | A    | G    | G    | C    | C    |
| SARS-CoV-2 Reference Genome NC_045512.2 | (6431) | A           | C    | C    | A    | T    | A    | G    | G    | C    | C    |
| Consensus                               | (8799) | C           | A    | C    | G    | A    | G    | G    | C    | C    | A    |
|                                         |        | Section 108 |      |      |      |      |      |      |      |      |      |
|                                         |        | (8882)      | 8882 | 8890 | 8900 | 8910 | 8920 | 8930 | 8940 | 8950 | 8964 |
| K12 Zwischenstück 255.328 - 290.948     | (8734) | G           | C    | C    | A    | T    | G    | C    | G    | G    | T    |
| SARS-CoV-2 Reference Genome NC_045512.2 | (6502) | A           | G    | C    | A    | A    | T    | A    | A    | T    | A    |
| Consensus                               | (8882) | C           | A    | T    | G    | T    | T    | A    | C    | A    | A    |
|                                         |        | Section 109 |      |      |      |      |      |      |      |      |      |
|                                         |        | (8965)      | 8965 | 8970 | 8980 | 8990 | 9000 | 9010 | 9020 | 9030 | 9047 |
| K12 Zwischenstück 255.328 - 290.948     | (8817) | A           | C    | G    | T    | A    | C    | C    | G    | T    | G    |
| SARS-CoV-2 Reference Genome NC_045512.2 | (6570) | A           | T    | T    | C    | T    | A    | T    | A    | A    | C    |
| Consensus                               | (8965) | A           | C    | T    | A    | T    | A    | T    | A    | A    | C    |
|                                         |        | Section 110 |      |      |      |      |      |      |      |      |      |
|                                         |        | (9048)      | 9048 | 9060 | 9070 | 9080 | 9090 | 9100 | 9110 | 9120 | 9130 |
| K12 Zwischenstück 255.328 - 290.948     | (8900) | G           | C    | G    | T    | T    | A    | C    | T    | G    | A    |
| SARS-CoV-2 Reference Genome NC_045512.2 | (6653) | G           | T    | T    | A    | A    | T    | A    | T    | A    | T    |
| Consensus                               | (9048) | G           | T    | T    | A    | T    | A    | T    | A    | T    | A    |
|                                         |        | Section 111 |      |      |      |      |      |      |      |      |      |
|                                         |        | (9131)      | 9131 | 9140 | 9150 | 9160 | 9170 | 9180 | 9190 | 9200 | 9213 |
| K12 Zwischenstück 255.328 - 290.948     | (8981) | A           | G    | A    | T    | G    | G    | T    | C    | A    | G    |
| SARS-CoV-2 Reference Genome NC_045512.2 | (6731) | A           | T    | A    | T    | A    | T    | A    | T    | A    | T    |
| Consensus                               | (9131) | A           | A    | G    | A    | T    | A    | T    | A    | T    | A    |
|                                         |        | Section 112 |      |      |      |      |      |      |      |      |      |
|                                         |        | (9214)      | 9214 | 9220 | 9230 | 9240 | 9250 | 9260 | 9270 | 9280 | 9296 |
| K12 Zwischenstück 255.328 - 290.948     | (9064) | C           | G    | T    | C    | T    | G    | C    | G    | A    | A    |
| SARS-CoV-2 Reference Genome NC_045512.2 | (6789) | --          | T    | A    | T    | G    | T    | A    | C    | A    | A    |
| Consensus                               | (9214) | T           | T    | G    | C    | T    | A    | T    | A    | T    | A    |



Sars-CoV-2 & E.coli K12 Zwischenstücke apr.apr

|                                         |        |                                                                                        |      |      |      |      |      |      |             |      |
|-----------------------------------------|--------|----------------------------------------------------------------------------------------|------|------|------|------|------|------|-------------|------|
|                                         | (9297) | 9297                                                                                   | 9310 | 9320 | 9330 | 9340 | 9350 | 9360 | Section 113 | 9379 |
| K12 Zwischenstück 255.328 - 290.948     | (9147) | GCACCTCGGTGCGGTTAAATC GTGCCGGTGAA GAGCGTTCATGGGCAATCAACTGATTCTGGTTGTCCAGATACAACACCGGG  |      |      |      |      |      |      |             |      |
| SARS-CoV-2 Reference Genome NC_045512.2 | (6864) | AGA-----TACTGTTAAGA GTGTCGGTAAATTTTGTCT--AGAGGCGT-TCAATTTAATTAT--TTG-----AAAGTCACT     |      |      |      |      |      |      |             |      |
| Consensus                               | (9297) | A T C GTTAA GTG CGGT AA GT T A GGC TCA T ATT T TTG AA C C                              |      |      |      |      |      |      |             |      |
|                                         | (9380) | 9380                                                                                   | 9390 | 9400 | 9410 | 9420 | 9430 | 9440 | Section 114 | 9462 |
| K12 Zwischenstück 255.328 - 290.948     | (9230) | AACTCTTC CCG-CTCAAGCGCGGCCATATGCAGT CGCAGCGATTACAGTACGCGCTGGGTAGAGGTGAAGGCTACGCCGGGCT  |      |      |      |      |      |      |             |      |
| SARS-CoV-2 Reference Genome NC_045512.2 | (6929) | AAATTTCATAAACTGATAAATATTATATAATTGTTTTACTATTAAAGTGTTCGCTAGGTTTC---TTTAACTCTACTCAA--C    |      |      |      |      |      |      |             |      |
| Consensus                               | (9380) | AA T TTC CT A AT GT C ATT A GC T GGT T A CTAC C C                                      |      |      |      |      |      |      |             |      |
|                                         | (9463) | 9463                                                                                   | 9470 | 9480 | 9490 | 9500 | 9510 | 9520 | Section 115 | 9545 |
| K12 Zwischenstück 255.328 - 290.948     | (9312) | CATGCGAGGTGGCGGTCCAGAGCCCTGAGCGGCCCGTGAATGAGACGCCGGTCTCTGGCGCTCAT-CTCGCCGGGTAAAAGGA    |      |      |      |      |      |      |             |      |
| SARS-CoV-2 Reference Genome NC_045512.2 | (7007) | GCTGCTTTTAGGTGTTTTAATGTC-----TAATTTAGGCA-----TGCCTCTTACTGTACTGGTTACAGAGA               |      |      |      |      |      |      |             |      |
| Consensus                               | (9463) | TGC GG G T A G C T A T AG C TG C TC T CT C GGT A A GA                                  |      |      |      |      |      |      |             |      |
|                                         | (9546) | 9546                                                                                   | 9560 | 9570 | 9580 | 9590 | 9600 | 9610 | Section 116 | 9628 |
| K12 Zwischenstück 255.328 - 290.948     | (9394) | AAGCTGTTTCATCTGTTGCTCTTCGTCAGTTCGATAAATACGCAGAAATGCGCTGAGCTCTGGATGTGTCATGTCATCTACTCC   |      |      |      |      |      |      |             |      |
| SARS-CoV-2 Reference Genome NC_045512.2 | (7069) | AGGCTATTTGAAC----CTACTAATGTCACT--ATTGCACACT-CTGTACTTGTTCTAT--ACC TTGTAGTGTGTTGT---C    |      |      |      |      |      |      |             |      |
| Consensus                               | (9546) | A GCT TTT A CT CT CT GTCA T AT A C A TG TG CT T A TTG A G T C                          |      |      |      |      |      |      |             |      |
|                                         | (9629) | 9629                                                                                   | 9640 | 9650 | 9660 | 9670 | 9680 | 9690 | Section 117 | 9711 |
| K12 Zwischenstück 255.328 - 290.948     | (9477) | GCAAGGCGGTAATAGTGTGCGGT CATCGCGTCAATTCCTGTA CGGCAGGCATGTGGCTATACGC AATCAGGCAGACAGCAATA |      |      |      |      |      |      |             |      |
| SARS-CoV-2 Reference Genome NC_045512.2 | (7140) | TTAGTGTGTTTAGATTCTTTTAGACAC-----TATCTTCTTTA-----GAAACTATACA-AATTACCATTTTATCTTTT        |      |      |      |      |      |      |             |      |
| Consensus                               | (9629) | AG G T A A T T G CA C T C TTCT TA G CTATAC AAT A CA C T                                |      |      |      |      |      |      |             |      |
|                                         | (9712) | 9712                                                                                   | 9720 | 9730 | 9740 | 9750 | 9760 | 9770 | Section 118 | 9794 |
| K12 Zwischenstück 255.328 - 290.948     | (9560) | CCTGCTGCTTCTGCACTTTGGGCATCGTTACCGTTCAGGCGAGTTAAACAGACGCGCATGTCTCATC GTTGT CAGGC TC GGG |      |      |      |      |      |      |             |      |
| SARS-CoV-2 Reference Genome NC_045512.2 | (7208) | AAATGGGATTTA--ACTGCTTTTGGGT TAGTTGCAGAGTGGTTTTTGGCATATATTCTTTTCAC TAG GTTTT-----TC TAT |      |      |      |      |      |      |             |      |
| Consensus                               | (9712) | G TT ACT TTT GGC T GTT C G G T A A A C T TC C GTT T TC                                 |      |      |      |      |      |      |             |      |
|                                         | (9795) | 9795                                                                                   | 9800 | 9810 | 9820 | 9830 | 9840 | 9850 | Section 119 | 9877 |
| K12 Zwischenstück 255.328 - 290.948     | (9643) | GGACATAAATGCGCGCATTGC TGAGGGTGTAGAACGACAGATACCA CCGCTGTAGCCCTCACAGAAAGCGGTCCA TCAGG    |      |      |      |      |      |      |             |      |
| SARS-CoV-2 Reference Genome NC_045512.2 | (7283) | GTACTTGGATTGCGTGC AATCA-TGCAATTGTTTTT CAGCTATTTTGCA-----GTA-----CATTTTATTAGTAAATCTTGG  |      |      |      |      |      |      |             |      |
| Consensus                               | (9795) | G AC T AT GC GC AT TG TGT C C A T CA GTA CA A GT TC GG                                 |      |      |      |      |      |      |             |      |

Sars-CoV-2 & E.coli K12 Zwischenstück.epr.apr

|                                         |         |             |       |       |       |       |       |       |       |       |     |
|-----------------------------------------|---------|-------------|-------|-------|-------|-------|-------|-------|-------|-------|-----|
|                                         |         | Section 120 |       |       |       |       |       |       |       |       |     |
|                                         | (9878)  | 9878        | 9890  | 9900  | 9910  | 9920  | 9930  | 9940  | 9950  | 9960  |     |
| K12 Zwischenstück 255.328 - 290.948     | (9726)  | C           | G     | A     | A     | G     | A     | T     | A     | T     | G   |
| SARS-CoV-2 Reference Genome NC_045512.2 | (7355)  | C           | T     | ---   | T     | A     | T     | G     | T     | G     | T   |
| Consensus                               | (9878)  | C           | T     | A     | T     | G     | T     | G     | T     | G     | T   |
|                                         |         | Section 121 |       |       |       |       |       |       |       |       |     |
|                                         | (9961)  | 9961        | 9970  | 9980  | 9990  | 10000 | 10010 | 10020 | 10030 | 10043 |     |
| K12 Zwischenstück 255.328 - 290.948     | (9806)  | G           | G     | G     | A     | C     | C     | G     | G     | C     | T   |
| SARS-CoV-2 Reference Genome NC_045512.2 | (7433)  | T           | T     | T     | T     | A     | T     | T     | A     | T     | T   |
| Consensus                               | (9961)  | G           | G     | A     | C     | C     | G     | G     | C     | T     | T   |
|                                         |         | Section 122 |       |       |       |       |       |       |       |       |     |
|                                         | (10044) | 10044       | 10050 | 10060 | 10070 | 10080 | 10090 | 10100 | 10110 | 10126 |     |
| K12 Zwischenstück 255.328 - 290.948     | (9889)  | T           | C     | C     | G     | T     | C     | A     | A     | A     | G   |
| SARS-CoV-2 Reference Genome NC_045512.2 | (7512)  | A           | T     | A     | G     | A     | C     | A     | A     | G     | A   |
| Consensus                               | (10044) | T           | C     | C     | G     | T     | C     | A     | A     | A     | G   |
|                                         |         | Section 123 |       |       |       |       |       |       |       |       |     |
|                                         | (10127) | 10127       | 10140 | 10150 | 10160 | 10170 | 10180 | 10190 | 10209 |       |     |
| K12 Zwischenstück 255.328 - 290.948     | (9970)  | T           | T     | C     | G     | C     | A     | T     | A     | G     | C   |
| SARS-CoV-2 Reference Genome NC_045512.2 | (7595)  | T           | T     | T     | G     | C     | A     | A     | C     | T     | A   |
| Consensus                               | (10127) | T           | T     | C     | G     | C     | A     | T     | A     | G     | C   |
|                                         |         | Section 124 |       |       |       |       |       |       |       |       |     |
|                                         | (10210) | 10210       | 10220 | 10230 | 10240 | 10250 | 10260 | 10270 | 10280 | 10292 |     |
| K12 Zwischenstück 255.328 - 290.948     | (10048) | G           | C     | T     | C     | A     | A     | G     | T     | T     | C   |
| SARS-CoV-2 Reference Genome NC_045512.2 | (7668)  | ---         | A     | A     | G     | T     | T     | ---   | ---   | ---   | --- |
| Consensus                               | (10210) | G           | C     | T     | C     | A     | A     | G     | T     | T     | C   |
|                                         |         | Section 125 |       |       |       |       |       |       |       |       |     |
|                                         | (10293) | 10293       | 10300 | 10310 | 10320 | 10330 | 10340 | 10350 | 10360 | 10375 |     |
| K12 Zwischenstück 255.328 - 290.948     | (10131) | A           | G     | T     | G     | T     | A     | T     | G     | C     | T   |
| SARS-CoV-2 Reference Genome NC_045512.2 | (7733)  | A           | T     | C     | G     | T     | A     | T     | G     | C     | T   |
| Consensus                               | (10293) | A           | G     | T     | G     | T     | A     | T     | G     | C     | T   |
|                                         |         | Section 126 |       |       |       |       |       |       |       |       |     |
|                                         | (10376) | 10376       | 10390 | 10400 | 10410 | 10420 | 10430 | 10440 | 10458 |       |     |
| K12 Zwischenstück 255.328 - 290.948     | (10212) | G           | T     | C     | A     | T     | T     | C     | T     | C     | T   |
| SARS-CoV-2 Reference Genome NC_045512.2 | (7809)  | G           | A     | C     | A     | T     | T     | C     | T     | C     | T   |
| Consensus                               | (10376) | G           | T     | C     | A     | T     | T     | C     | T     | C     | T   |

Sars-CoV-2 & E.coli K12 Zwischenstückaprr.apr

|                                         |         |       |             |       |       |       |       |       |       |       |      |       |
|-----------------------------------------|---------|-------|-------------|-------|-------|-------|-------|-------|-------|-------|------|-------|
|                                         |         |       | Section 127 |       |       |       |       |       |       |       |      |       |
|                                         | (10459) | 10459 | 10470       | 10480 | 10490 | 10500 | 10510 | 10520 | 10530 | 10541 |      |       |
| K12 Zwischenstück 255.328 - 290.948     | (10294) | C     | AGT         | CG    | TTG   | TC    | CAG   | TC    | CG    | AG    | AGT  | GGT   |
| SARS-CoV-2 Reference Genome NC_045512.2 | (7888)  | -     | AGT         | TT    | TTG   | TC    | AGT   | TC    | CG    | AG    | AGT  | GGT   |
| Consensus (10459)                       |         |       | AGT         | TTG   | TG    | TC    | A     | GTG   | A     | GAA   | TCT  | C     |
|                                         |         |       | Section 128 |       |       |       |       |       |       |       |      |       |
|                                         | (10542) | 10542 | 10550       | 10560 | 10570 | 10580 | 10590 | 10600 | 10610 | 10624 |      |       |
| K12 Zwischenstück 255.328 - 290.948     | (10377) | A     | TTG         | AC    | G     | TAG   | AC    | G     | T     | C     | CA   | AG    |
| SARS-CoV-2 Reference Genome NC_045512.2 | (7968)  | C     | TAT         | AC    | T     | GTT   | AC    | T     | AG    | AT    | CA   | AG    |
| Consensus (10542)                       |         |       | T           | AC    | AC    | T     | GA    | C     | G     | C     | T    | A     |
|                                         |         |       | Section 129 |       |       |       |       |       |       |       |      |       |
|                                         | (10625) | 10625 | 10630       | 10640 | 10650 | 10660 | 10670 | 10680 | 10690 | 10707 |      |       |
| K12 Zwischenstück 255.328 - 290.948     | (10460) | G     | GCT         | GG    | ACG   | GAA   | TAA   | TGT   | ACT   | GCT   | GGT  | GAT   |
| SARS-CoV-2 Reference Genome NC_045512.2 | (8041)  | T     | GCT         | T     | ACG   | TT    | AATA  | CGT   | TTT   | CA    | CA   | AGT   |
| Consensus (10625)                       |         |       | GCT         | ACG   | A     | A     | GT    | T     | T     | T     | A    | C     |
|                                         |         |       | Section 130 |       |       |       |       |       |       |       |      |       |
|                                         | (10708) | 10708 | 10720       | 10730 | 10740 | 10750 | 10760 | 10770 | 10780 | 10790 |      |       |
| K12 Zwischenstück 255.328 - 290.948     | (10542) | A     | TC          | G     | CA    | AGG   | GTA   | AG    | AA    | AGA   | CT   | TT    |
| SARS-CoV-2 Reference Genome NC_045512.2 | (8123)  | C     | TTG         | C     | ----- | AAAGA | ATG   | TG    | CT    | TAG   | CAA  | TG    |
| Consensus (10708)                       |         |       | T           | G     |       | AAAGA | TG    | T     | CT    | A     | A    | AA    |
|                                         |         |       | Section 131 |       |       |       |       |       |       |       |      |       |
|                                         | (10791) | 10791 | 10800       | 10810 | 10820 | 10830 | 10840 | 10850 | 10860 | 10873 |      |       |
| K12 Zwischenstück 255.328 - 290.948     | (10625) | C     | GC          | T     | GG    | CTTC  | GGTCA | CG    | CT    | GTA   | TT   | CCG   |
| SARS-CoV-2 Reference Genome NC_045512.2 | (8191)  | T     | GAT         | TT    | CAG   | AT    | GTAG  | AA    | CT    | AA    | AG   | AT    |
| Consensus (10791)                       |         |       | G           | T     |       | G     | A     | CT    | A     | T     | TTG  | TG    |
|                                         |         |       | Section 132 |       |       |       |       |       |       |       |      |       |
|                                         | (10874) | 10874 | 10880       | 10890 | 10900 | 10910 | 10920 | 10930 | 10940 | 10956 |      |       |
| K12 Zwischenstück 255.328 - 290.948     | (10708) | C     | TC          | G     | CG    | AG    | CA    | AG    | TA    | CA    | CC   | GG    |
| SARS-CoV-2 Reference Genome NC_045512.2 | (8270)  | AG    | TT          | G     | TAA   | TA    | CT    | AT    | GT    | GC    | AT   | AA    |
| Consensus (10874)                       |         |       | T           | G     | A     | A     | TA    | A     | C     | C     | ATAA | ----- |
|                                         |         |       | Section 133 |       |       |       |       |       |       |       |      |       |
|                                         | (10957) | 10957 | 10970       | 10980 | 10990 | 11000 | 11010 | 11020 | 11039 |       |      |       |
| K12 Zwischenstück 255.328 - 290.948     | (10790) | T     | GAT         | TGT   | CAG   | GGTTC | GAGGG | TATC  | AGT   | AGCT  | GC   | CC    |
| SARS-CoV-2 Reference Genome NC_045512.2 | (8342)  | -     | GAC         | TGT   | ----- | AGT   | GCGC  | GT    | CA    | AT    | AA   | TG    |
| Consensus (10957)                       |         |       | GA          | TGT   |       | AGT   | G     | C     | AT    | A     | T    | GC    |

Sars-CoV-2 & E.coli K12 Zwischenstück.epr.apr

|                                                |         |         |            |        |         |          |          |         |           |                             |         |         |       |        |        |        |         |        |          |       |        |     |     |   |   |
|------------------------------------------------|---------|---------|------------|--------|---------|----------|----------|---------|-----------|-----------------------------|---------|---------|-------|--------|--------|--------|---------|--------|----------|-------|--------|-----|-----|---|---|
|                                                |         |         |            |        |         |          |          |         |           | Section 134                 |         |         |       |        |        |        |         |        |          |       |        |     |     |   |   |
| (11040)                                        | 11040   | 11050   | 11060      | 11070  | 11080   | 11090    | 11100    | 11110   | 11122     |                             |         |         |       |        |        |        |         |        |          |       |        |     |     |   |   |
| K12 Zwischenstück 255.328 - 290.948 (10873)    | CGGGTC  | CGTCA   | CCCTCCTGGT | ATTCCA | GTTTGT  | ATGTTT   | TCGGCA   | ATACACA | GCGCATTC  | ATCATGTGGCTGGACGGTTTTTTTCCT |         |         |       |        |        |        |         |        |          |       |        |     |     |   |   |
| SARS-CoV-2 Reference Genome NC 045512.2 (8403) | --GGAA  | CGTTAA  | AAG-----   | ATTTC  | ---TGTC | TTGCTG   | AAACA    | ACTAC   | GAAAACAA  | ATACGTAGT-----GCTGCTAAAAA   |         |         |       |        |        |        |         |        |          |       |        |     |     |   |   |
| Consensus (11040)                              | GG      | CGT     | A          | ATT    | CA      | TG       | TT       | TC      | G         | A                           | AC      | G       | A     | AT     | GT     | G      | G       | T      | T        |       |        |     |     |   |   |
|                                                |         |         |            |        |         |          |          |         |           | Section 135                 |         |         |       |        |        |        |         |        |          |       |        |     |     |   |   |
| (11123)                                        | 11123   | 11130   | 11140      | 11150  | 11160   | 11170    | 11180    | 11190   | 11205     |                             |         |         |       |        |        |        |         |        |          |       |        |     |     |   |   |
| K12 Zwischenstück 255.328 - 290.948 (10956)    | GCATAT  | CCACGAG | GGTAGTA    | GTAACT | TGCCAT  | CCTCGCAG | GCATCGGG | CGACTG  | GCGGGT    | TACGTAAAC                   | CTGCAAG | GTGG    | GAC   | CG     |        |        |         |        |          |       |        |     |     |   |   |
| SARS-CoV-2 Reference Genome NC 045512.2 (8470) | GAATA   | ACTT--  | ACCTTT     | TA--   | AGTGA   | CATGT--  | GCACTA   | CTAGACA | AGTTGTTAA | T--GTTGT                    | AACAA   | CAAG    | GATAG | GACT   |        |        |         |        |          |       |        |     |     |   |   |
| Consensus (11123)                              | G       | ATA     | C          | A      | T       | TA       | A        | TG      | CAT       | GCA                         | C       | A       | G     | C      | A      | T      | G       | T      | GT       | A     | C      | CAA | G   | G | C |
|                                                |         |         |            |        |         |          |          |         |           | Section 136                 |         |         |       |        |        |        |         |        |          |       |        |     |     |   |   |
| (11206)                                        | 11206   | 11220   | 11230      | 11240  | 11250   | 11260    | 11270    | 11288   |           |                             |         |         |       |        |        |        |         |        |          |       |        |     |     |   |   |
| K12 Zwischenstück 255.328 - 290.948 (11039)    | GATAA   | GTAGT   | CAAC       | TGTGA  | CCAT    | TCCTT    | CGTGA    | CATCAT  | TCCTG     | GTGGC                       | TGACC   | CATCACT | GAAAC | CGCGT  | GGGG   | TGAGG  | TC      |        |          |       |        |     |     |   |   |
| SARS-CoV-2 Reference Genome NC 045512.2 (8545) | TAAGG   | GTGGT   | AAAT       | TGTTA  | --AT    | AA       | TTGGT    | TGA     | -AGCA     | -----                       | GT      | TAA     | TTAA  | AGTTA  | CACT   | -----  | TGTGT   | TC     |          |       |        |     |     |   |   |
| Consensus (11206)                              | A       | GT      | GT         | AA     | TGT     | A        | AT       | TT      | G         | TGA                         | A       | CA      | GT    | T      | A      | CACT   | -----   | TG     | G        | TC    |        |     |     |   |   |
|                                                |         |         |            |        |         |          |          |         |           | Section 137                 |         |         |       |        |        |        |         |        |          |       |        |     |     |   |   |
| (11289)                                        | 11289   | 11300   | 11310      | 11320  | 11330   | 11340    | 11350    | 11360   | 11371     |                             |         |         |       |        |        |        |         |        |          |       |        |     |     |   |   |
| K12 Zwischenstück 255.328 - 290.948 (11122)    | CTTAAAT | TTACT   | GATGGCC    | TTCA   | GGT     | CATC     | ACTT     | CTGT    | -CAT      | CGCATG                      | CGATG   | AGAA    | ACAG  | AGTGG  | TG---- | GCAAC  | CAGCGC  |        |          |       |        |     |     |   |   |
| SARS-CoV-2 Reference Genome NC 045512.2 (8606) | CTTTTT  | TTGTT   | GCTATTTT   | CTA    | TTTA    | ATAAC    | ACCTGT   | T       | CATGT     | CATG                        | TCTAA   | ACAT    | ACTG  | ACTTTT | CAAGT  | GAAAT  | CATAG   | G      |          |       |        |     |     |   |   |
| Consensus (11289)                              | CTT     | TT      | CTG        | T      | T       | A        | T        | AT      | AC        | CTGT                        | CAT     | CATG    | A     | A      | AC     | GA     | T       | T      | G        | AA    | CA     | G   |     |   |   |
|                                                |         |         |            |        |         |          |          |         |           | Section 138                 |         |         |       |        |        |        |         |        |          |       |        |     |     |   |   |
| (11372)                                        | 11372   | 11380   | 11390      | 11400  | 11410   | 11420    | 11430    | 11440   | 11454     |                             |         |         |       |        |        |        |         |        |          |       |        |     |     |   |   |
| K12 Zwischenstück 255.328 - 290.948 (11200)    | CAG     | CAGA    | GGCAG      | TGTT   | TACGT   | TCA      | TAT      | TTTT    | T         | CCTGAAAT                    | CAGA    | CGA     | AC    | CAC    | TTT    | GCA    | AGACAT  | AAATGC | CC       | ACGAA |        |     |     |   |   |
| SARS-CoV-2 Reference Genome NC 045512.2 (8689) | ATA     | CAAG    | GCTAT      | TGAT   | GGTG    | GTG      | TCA      | CTCG    | TGACAT    | TAGCATCTA                   | CAGAT-- | ACTTG   | TTT   | TGCTAA | --CAA  | ACATGC | TG      | ATTTT  |          |       |        |     |     |   |   |
| Consensus (11372)                              |         | CA      | G          | A      | TG      | T        | GT       | TCA     | T         | T                           |         | CAGA    | AC    | TTT    | GC     | AA     | CA      | A      | ATGC     | A     |        |     |     |   |   |
|                                                |         |         |            |        |         |          |          |         |           | Section 139                 |         |         |       |        |        |        |         |        |          |       |        |     |     |   |   |
| (11455)                                        | 11455   | 11460   | 11470      | 11480  | 11490   | 11500    | 11510    | 11520   | 11537     |                             |         |         |       |        |        |        |         |        |          |       |        |     |     |   |   |
| K12 Zwischenstück 255.328 - 290.948 (11283)    | AATAC   | CCACC   | GGCAC      | GCG    | GA      | CGAAC    | GGTGT    | TCAG    | CGCG      | ACACT                       | GGCAG   | CACC    | GGC   | TGC    | CCACCT | CCC    | GT      | CAGC   | AGTGC    | GCAA  |        |     |     |   |   |
| SARS-CoV-2 Reference Genome NC 045512.2 (8768) | GAC     | AC--    | ATG        | TTTA   | GCG     | AG       | CGT--    | GGTGT   | GTAG      | TT--                        | AT      | ACT     | AATGA | CA     | AG     | CT     | TGC     | -CCA   | TTG----- | AT    | TGC    | T   | GCA | G |   |
| Consensus (11455)                              | A       | AC      | A          | G      | GCC     | CG       | GGTGT    | AG      | A         | ACT                         | CA      | G       | TGC   | CCA    |        |        |         |        | A        | TGC   | GCA    |     |     |   |   |
|                                                |         |         |            |        |         |          |          |         |           | Section 140                 |         |         |       |        |        |        |         |        |          |       |        |     |     |   |   |
| (11538)                                        | 11538   | 11550   | 11560      | 11570  | 11580   | 11590    | 11600    | 11610   | 11620     |                             |         |         |       |        |        |        |         |        |          |       |        |     |     |   |   |
| K12 Zwischenstück 255.328 - 290.948 (11366)    | CAG     | TGG     | CAAG       | G      | TCAG    | G        | CCCG     | GAGAC   | TGTCG     | GAC                         | ACCC    | CGGT    | TTTG  | TTCA   | G      | ATGAT  | GACGAT  | ACAAC  | -AATGG   | C     | GATAAT |     |     |   |   |
| SARS-CoV-2 Reference Genome NC 045512.2 (8835) | TCA     | TAA     | CAAG       | GA-    | AGTG    | ----     | G        | TTTT    | TGTCG     | TG                          | ----    | CTGG    | TTTG  | CCTG   | G      | ACGAT  | ATTACGC | ACAAC  | T        | AATGG | T      | GA  | CTT | T |   |
| Consensus (11538)                              |         | T       | CAAG       | G      | AG      | G        | G        |         | TGTCG     | C                           |         | C       | G     | TTTG   | G      | A      | GAT     | ACAAC  | AATGG    | GA    |        | T   |     |   |   |

Sars-CoV-2 & E.coli K12 Zwischenstückkeapr.apr

|                                         |         |             |       |       |         |       |              |          |       |       |      |
|-----------------------------------------|---------|-------------|-------|-------|---------|-------|--------------|----------|-------|-------|------|
|                                         |         | Section 141 |       |       |         |       |              |          |       |       |      |
|                                         | (11621) | 11621       | 11630 | 11640 | 11650   | 11660 | 11670        | 11680    | 11690 | 11703 |      |
| K12 Zwischenstück 255.328 - 290.948     | (11448) | GGCA        | ATA   | TC    | CGGA    | CT    | GATAC        | T        | CCAG  | GT    | C    |
| SARS-CoV-2 Reference Genome NC_045512.2 | (8909)  | TTGC        | ATT   | TC    | TTAC    | CT    | AGAGT        | T        | TTTA  | GT    | G    |
| Consensus (11621)                       |         | AT          | TC    | CT    | T       | GT    | CAG          | T        | A     | CA    | C    |
|                                         |         | Section 142 |       |       |         |       |              |          |       |       |      |
|                                         | (11704) | 11704       | 11710 | 11720 | 11730   | 11740 | 11750        | 11760    | 11770 | 11786 |      |
| K12 Zwischenstück 255.328 - 290.948     | (11530) | AA          | AC    | TCAGC | GGCAAGC | TT    | ACGCACACTCAG | C        | GTTT  | CCC   | CTGC |
| SARS-CoV-2 Reference Genome NC_045512.2 | (8992)  | AA          | CA    | TCAGC | -----   | TT    | -----        | G        | GTTT  | TGG   | CTGC |
| Consensus (11704)                       |         | AA          | TCAGC |       | TT      |       |              | G        | GTTT  | CTGC  |      |
|                                         |         | Section 143 |       |       |         |       |              |          |       |       |      |
|                                         | (11787) | 11787       | 11800 | 11810 | 11820   | 11830 | 11840        | 11850    | 11869 |       |      |
| K12 Zwischenstück 255.328 - 290.948     | (11613) | GGT         | CAT   | GCG   | G       | GCG   | T            | CT       | G     | CC    | TG   |
| SARS-CoV-2 Reference Genome NC_045512.2 | (9056)  | C--         | CAT   | ATT   | G       | T     | T            | GA       | ACC   | AA    | TGT  |
| Consensus (11787)                       |         | CAT         | G     | T     | T       | CC    | TGT          | T        | A     | GTTCT |      |
|                                         |         | Section 144 |       |       |         |       |              |          |       |       |      |
|                                         | (11870) | 11870       | 11880 | 11890 | 11900   | 11910 | 11920        | 11930    | 11940 | 11952 |      |
| K12 Zwischenstück 255.328 - 290.948     | (11691) | AA          | GAG   | GG    | GG      | TC    | GGAC         | A        | GGGT  | AT    | GGAC |
| SARS-CoV-2 Reference Genome NC_045512.2 | (9135)  | TG          | GAT   | GG    | C-      | TC    | TATTA        | TTCA     | AT    | TTC   | G    |
| Consensus (11870)                       |         | GA          | GG    | TC    | A       | AT    | C            | A        | A     | CTA   | TT   |
|                                         |         | Section 145 |       |       |         |       |              |          |       |       |      |
|                                         | (11953) | 11953       | 11960 | 11970 | 11980   | 11990 | 12000        | 12010    | 12020 | 12035 |      |
| K12 Zwischenstück 255.328 - 290.948     | (11773) | CT          | TCCCT | CG    | GT      | GAG   | TGA          | GG       | AC    | GG    | T    |
| SARS-CoV-2 Reference Genome NC_045512.2 | (9207)  | CT          | GAGTA | CT    | GT      | AG    | GC           | GG       | CAC   | TT    | G    |
| Consensus (11953)                       |         | CT          | C     | GT    | G       | GG    | C            | T        | G     | A     | G    |
|                                         |         | Section 146 |       |       |         |       |              |          |       |       |      |
|                                         | (12036) | 12036       | 12050 | 12060 | 12070   | 12080 | 12090        | 12100    | 12118 |       |      |
| K12 Zwischenstück 255.328 - 290.948     | (11855) | GG          | T     | C     | A       | T     | G            | C        | A     | G     | T    |
| SARS-CoV-2 Reference Genome NC_045512.2 | (9290)  | GAT         | TAT   | T     | CAG     | AT    | CT           | T        | A     | C     | AGG  |
| Consensus (12036)                       |         | G           | T     | A     | T       | CAG   | T            | C        | T     | A     | CAGG |
|                                         |         | Section 147 |       |       |         |       |              |          |       |       |      |
|                                         | (12119) | 12119       | 12130 | 12140 | 12150   | 12160 | 12170        | 12180    | 12190 | 12201 |      |
| K12 Zwischenstück 255.328 - 290.948     | (11936) | A           | CGGC  | AC    | GGG     | TAT   | GTG          | ACCGTCCT | C     | CTT   | T    |
| SARS-CoV-2 Reference Genome NC_045512.2 | (9368)  | A           | TTCA  | AC    | CTAT    | TG    | GTG          | -----    | G     | TTT   | G    |
| Consensus (12119)                       |         | A           | AC    | T     | GTG     |       |              |          | C     | TT    | G    |

Sars-CoV-2 & E.coli K12 Zwischenstücke apr.apr

Sars-CoV-2 & E.coli K12 Zwischenstück.epr.apr

|                                                 |  |  |  |  |  |  |  |  |  |  |  |  |  |  |             |        |       |       |         |          |        |          |          |       |          |        |          |        |        |       |       |        |       |       |           |            |       |         |       |       |      |       |       |   |  |  |  |  |  |  |
|-------------------------------------------------|--|--|--|--|--|--|--|--|--|--|--|--|--|--|-------------|--------|-------|-------|---------|----------|--------|----------|----------|-------|----------|--------|----------|--------|--------|-------|-------|--------|-------|-------|-----------|------------|-------|---------|-------|-------|------|-------|-------|---|--|--|--|--|--|--|
|                                                 |  |  |  |  |  |  |  |  |  |  |  |  |  |  | Section 155 |        |       |       |         |          |        |          |          |       |          |        |          |        |        |       |       |        |       |       |           |            |       |         |       |       |      |       |       |   |  |  |  |  |  |  |
|                                                 |  |  |  |  |  |  |  |  |  |  |  |  |  |  | (12783)     | 12783  | 12790 | 12800 | 12810   | 12820    | 12830  | 12840    | 12850    | 12865 |          |        |          |        |        |       |       |        |       |       |           |            |       |         |       |       |      |       |       |   |  |  |  |  |  |  |
| K12 Zwischenstück 255.328 - 290.948 (12590)     |  |  |  |  |  |  |  |  |  |  |  |  |  |  | GGCACTA     | CGCGAA | CA    | GCTCT | TCACGGG | TTAA     | CGGACG | GT       | CG       | GAC   | GGATTAAG | GGTT   | GTGCTGCG | CCAA   | AGCG   | CGA   | AGC   | CAGACG |       |       |           |            |       |         |       |       |      |       |       |   |  |  |  |  |  |  |
| SARS-CoV-2 Reference Genome NC_045512.2 (9965)  |  |  |  |  |  |  |  |  |  |  |  |  |  |  | -----       | CTCGAA | AG    | GCTCT | CAATGAC | TTCA     | -----  | GTAA     | CTCA     | GGT   | TCTGAT   | GT     | TTCTTTA  | CCAA   | CCAC   | CAC   | AAAC  | CTCTA  |       |       |           |            |       |         |       |       |      |       |       |   |  |  |  |  |  |  |
| Consensus (12783)                               |  |  |  |  |  |  |  |  |  |  |  |  |  |  |             | C      | CG    | AA    | GCTCT   | A        | G      | TT       | A        |       | GT       | C      | GG       | T      | G      | T     | T     | CT     |       | CCAA  |           | C          | A     | C       |       |       |      |       |       |   |  |  |  |  |  |  |
|                                                 |  |  |  |  |  |  |  |  |  |  |  |  |  |  | Section 156 |        |       |       |         |          |        |          |          |       |          |        |          |        |        |       |       |        |       |       |           |            |       |         |       |       |      |       |       |   |  |  |  |  |  |  |
|                                                 |  |  |  |  |  |  |  |  |  |  |  |  |  |  | (12866)     | 12866  |       | 12880 | 12890   | 12900    | 12910  | 12920    | 12930    | 12948 |          |        |          |        |        |       |       |        |       |       |           |            |       |         |       |       |      |       |       |   |  |  |  |  |  |  |
| K12 Zwischenstück 255.328 - 290.948 (12673)     |  |  |  |  |  |  |  |  |  |  |  |  |  |  | GGT         | CATA   | AGCAG | GACT  | TCCT    | CATA     | ACGG   | GAAA     | CAAA     | TAAA  | AGG      | GAT    | CCCC     | TC     | --     | GATC  | GGC   | GACAG  | GGG   | GC    | AGGG      | --         | AAGTA |         |       |       |      |       |       |   |  |  |  |  |  |  |
| SARS-CoV-2 Reference Genome NC_045512.2 (10035) |  |  |  |  |  |  |  |  |  |  |  |  |  |  | TCA         | CC     | TC    | AGC   | T       | GTG      | CAG    | AGT      | GGTTTT   | AGAAA | --       | AAT    | GG       | CAT    | CCCC   | TC    | TG    | TAAAG  | TT    | GAGG  | GTT       | GT         | AT    | GGTAC   | AAGTA |       |      |       |       |   |  |  |  |  |  |  |
| Consensus (12866)                               |  |  |  |  |  |  |  |  |  |  |  |  |  |  |             | C      | T     | AGC   | G       | T        | CA     | A        | GG       |       | A        | AAA    | AA       | GG     | AT     | CCC   | TC    | G      | A     | G     | GA        | G          | G     | A       | GG    | AAGTA |      |       |       |   |  |  |  |  |  |  |
|                                                 |  |  |  |  |  |  |  |  |  |  |  |  |  |  | Section 157 |        |       |       |         |          |        |          |          |       |          |        |          |        |        |       |       |        |       |       |           |            |       |         |       |       |      |       |       |   |  |  |  |  |  |  |
|                                                 |  |  |  |  |  |  |  |  |  |  |  |  |  |  | (12949)     | 12949  | 12960 | 12970 | 12980   | 12990    | 13000  | 13010    | 13020    | 13031 |          |        |          |        |        |       |       |        |       |       |           |            |       |         |       |       |      |       |       |   |  |  |  |  |  |  |
| K12 Zwischenstück 255.328 - 290.948 (12751)     |  |  |  |  |  |  |  |  |  |  |  |  |  |  | ACAG        | GGA    | TGG   | GTT   | AAATAC  | T        | CAGAA  | GAAGAAAT | TCC      | CA-   | GAC      | GGCG   | CG       | GGCC   | ACTGAC | -ACC  | ACC-  | GTGGT  | GC    | GCAC  | GG        | C          | TGA   |         |       |       |      |       |       |   |  |  |  |  |  |  |
| SARS-CoV-2 Reference Genome NC_045512.2 (10115) |  |  |  |  |  |  |  |  |  |  |  |  |  |  | AC          | TTG    | --    | TGG   | TACAA   | C        | TAC    | ACTTAA   | CGGTCTT  | TGG   | CTT      | GAT    | GAC      | GTA    | TTT    | ACTGT | C     | AAG    | ACAT  | GTGAT | CT        | GCAC       | CTC   | TGA     |       |       |      |       |       |   |  |  |  |  |  |  |
| Consensus (12949)                               |  |  |  |  |  |  |  |  |  |  |  |  |  |  | AC          | G      |       | TGG   | AA      | TAC      | C      | AA       |          | T     | C        | GA     | G        | CG     | G      |       | ACTG  | C      | A     | AC    | GTG       | T          | GCAC  | C       | TGA   |       |      |       |       |   |  |  |  |  |  |  |
|                                                 |  |  |  |  |  |  |  |  |  |  |  |  |  |  | Section 158 |        |       |       |         |          |        |          |          |       |          |        |          |        |        |       |       |        |       |       |           |            |       |         |       |       |      |       |       |   |  |  |  |  |  |  |
|                                                 |  |  |  |  |  |  |  |  |  |  |  |  |  |  | (13032)     | 13032  | 13040 | 13050 | 13060   | 13070    | 13080  | 13090    | 13100    | 13114 |          |        |          |        |        |       |       |        |       |       |           |            |       |         |       |       |      |       |       |   |  |  |  |  |  |  |
| K12 Zwischenstück 255.328 - 290.948 (12831)     |  |  |  |  |  |  |  |  |  |  |  |  |  |  | AT          | GAC    | GGC   | CGC   | ACC     | -----    | GGG    | CGGGTA   | TCA      | GGG   | GAAAG    | GC-    | ACT      | GAT    | GC     | TAT   | TC    | GAG-   | TAC   | GGC   | CCG       | ACGGT      | TTCA  | C       |       |       |      |       |       |   |  |  |  |  |  |  |
| SARS-CoV-2 Reference Genome NC_045512.2 (10195) |  |  |  |  |  |  |  |  |  |  |  |  |  |  | A-          | GAC    | ATG   | CTTA  | ACC     | CTAATTAT | GAA    | GATTTAC  | TCA      | TTT   | GTAAG    | TCTAAT | CAT      | AA     | TTTC   | TTG   | TAC   | AGG    | CTG   | G     | TAATG     | TTCA       | A     |         |       |       |      |       |       |   |  |  |  |  |  |  |
| Consensus (13032)                               |  |  |  |  |  |  |  |  |  |  |  |  |  |  | A           | GAC    |       | C     | ACC     |          | G      | G        |          | TCA   | G        | AAG    | C        | A      | T      | AT    | T     | TC     | G     | TAC   | G         | C          | G     |         | TTCA  |       |      |       |       |   |  |  |  |  |  |  |
|                                                 |  |  |  |  |  |  |  |  |  |  |  |  |  |  | Section 159 |        |       |       |         |          |        |          |          |       |          |        |          |        |        |       |       |        |       |       |           |            |       |         |       |       |      |       |       |   |  |  |  |  |  |  |
|                                                 |  |  |  |  |  |  |  |  |  |  |  |  |  |  | (13115)     | 13115  | 13120 | 13130 | 13140   | 13150    | 13160  | 13170    | 13180    | 13197 |          |        |          |        |        |       |       |        |       |       |           |            |       |         |       |       |      |       |       |   |  |  |  |  |  |  |
| K12 Zwischenstück 255.328 - 290.948 (12904)     |  |  |  |  |  |  |  |  |  |  |  |  |  |  | CAA         | AATC   | GC    | TAC   | GAG     | CGT      | GT     | TCCCG    | GGA      | CTA   | CCGT     | CT     | G        | CGA    | AAG    | G--   | AAGGA | TG     | GAGTT | GC    | GACA      | CCACC      | G     | GGCTGGT | G     | CC    | T    |       |       |   |  |  |  |  |  |  |
| SARS-CoV-2 Reference Genome NC_045512.2 (10277) |  |  |  |  |  |  |  |  |  |  |  |  |  |  | CTC         | AGG-   | GT    | TATTG | GAC     | AT       | TCTATG | CAAA     | ATT      | GT    | GT       | GT     | C        | AAG    | CTT    | AAGG  | TG    | ATACA  | GCC   | AAT   | CCTAAG    | GACACCTAAG | GTAT  |         |       |       |      |       |       |   |  |  |  |  |  |  |
| Consensus (13115)                               |  |  |  |  |  |  |  |  |  |  |  |  |  |  | C           | A      | G     | TA    | G       | C        | T      |          | G        | A     | A        | GT     | GT       | C      | AAG    |       | AAGG  | TG     |       | GC    | A         | CC         | G     |         | G     | T     |      |       |       |   |  |  |  |  |  |  |
|                                                 |  |  |  |  |  |  |  |  |  |  |  |  |  |  | Section 160 |        |       |       |         |          |        |          |          |       |          |        |          |        |        |       |       |        |       |       |           |            |       |         |       |       |      |       |       |   |  |  |  |  |  |  |
|                                                 |  |  |  |  |  |  |  |  |  |  |  |  |  |  | (13198)     | 13198  | 13210 | 13220 | 13230   | 13240    | 13250  | 13260    | 13270    | 13280 |          |        |          |        |        |       |       |        |       |       |           |            |       |         |       |       |      |       |       |   |  |  |  |  |  |  |
| K12 Zwischenstück 255.328 - 290.948 (12985)     |  |  |  |  |  |  |  |  |  |  |  |  |  |  | CAC         | GTG    | G     | CAG   | GCA     | CTTAA    | TCA    | TCCGCT   | CGGCCA   | TCA   | CCT      | T      | AAGC     | CC---- | CCATT  | GT    | AG    | AC     | GGAC  | CG    | GACACAGCA | CAC        | ACCC  | GG      |       |       |      |       |       |   |  |  |  |  |  |  |
| SARS-CoV-2 Reference Genome NC_045512.2 (10358) |  |  |  |  |  |  |  |  |  |  |  |  |  |  | AAG         | T      | GT    | TTC   | GCA     | TTCA     | CA     | GGAC     | AGACTTTT | TCA   | GTG      | T      | AGC      | TTGTTA | CAAT   | GT    | T     | AC     | CAT   | CT    | G         | GTGTTTAC   | CA    | ATGT    | G     |       |      |       |       |   |  |  |  |  |  |  |
| Consensus (13198)                               |  |  |  |  |  |  |  |  |  |  |  |  |  |  | A           | T      | G     |       | GCA     | T        | AA     | CA       |          |       | TCA      |        | T        | AGC    |        | C     | AT    | GT     | AC    |       | C         | G          |       | CA      |       | G     |      |       |       |   |  |  |  |  |  |  |
|                                                 |  |  |  |  |  |  |  |  |  |  |  |  |  |  | Section 161 |        |       |       |         |          |        |          |          |       |          |        |          |        |        |       |       |        |       |       |           |            |       |         |       |       |      |       |       |   |  |  |  |  |  |  |
|                                                 |  |  |  |  |  |  |  |  |  |  |  |  |  |  | (13281)     | 13281  | 13290 | 13300 | 13310   | 13320    | 13330  | 13340    | 13350    | 13363 |          |        |          |        |        |       |       |        |       |       |           |            |       |         |       |       |      |       |       |   |  |  |  |  |  |  |
| K12 Zwischenstück 255.328 - 290.948 (13064)     |  |  |  |  |  |  |  |  |  |  |  |  |  |  | ATG         | GAC    | GGG   | C--   | TGGA    | AC       | AGC    | T        | CAT      | G     | CAG      | CAGG   | CA--     | GATTT  | T      | G     | GGC   | TG     | TAT   | TCT-- | GCTT      | CTG        | CGCC  | GTGG    | ACA   | ACTGT | C    |       |       |   |  |  |  |  |  |  |
| SARS-CoV-2 Reference Genome NC_045512.2 (10441) |  |  |  |  |  |  |  |  |  |  |  |  |  |  | TAT         | GAG    | GCC   | CAAT  | TTC     | AC       | TAT    | T        | AGG      | GTT   | CA       | TT     | C        | TTA    | AT     | GG    | T     | CAT    | G     | TG    | TAG       | T          | GT    | TG      | TTTAA | CATA  | GATT | ATG   | ACTGT | G |  |  |  |  |  |  |
| Consensus (13281)                               |  |  |  |  |  |  |  |  |  |  |  |  |  |  |             | GA     | G     | C     | T       | AC       |        | T        | A        | G     |          | CA     | C        |        | AT     | T     | C     |        | TG    | TA    | T         | T          | G     | TT      | C     | G     | A    | ACTGT |       |   |  |  |  |  |  |  |

Sars-CoV-2 & E.coli K12 Zwischenstückaprr.apr

|                                                 |                             |                                         |                                       |                                         |                                     |                                         |                               |                   |           |             |
|-------------------------------------------------|-----------------------------|-----------------------------------------|---------------------------------------|-----------------------------------------|-------------------------------------|-----------------------------------------|-------------------------------|-------------------|-----------|-------------|
|                                                 |                             |                                         |                                       |                                         |                                     |                                         |                               |                   |           | Section 162 |
| (13364)                                         | 13364                       | 13370                                   | 13380                                 | 13390                                   | 13400                               | 13410                                   | 13420                         | 13430             | 13446     |             |
| K12 Zwischenstück 255.328 - 290.948 (13141)     | C C C ACCGC                 | T G G T A G G T C                       | G G C C T A T C C G A                 | C T G G C T G A T A A C                 | A A A C A G C A C C                 | T T A T G C C G G T A T A C C T C T C C | A A T C A C C T G A           |                   |           |             |
| SARS-CoV-2 Reference Genome NC_045512.2 (10524) | T C T C T T T T             | T G T A C A T G C A                     | C C A T A T G                         | G A                                     | -----                               | A T T A C C A A C T G G A G T           | T C A T G C T G G C A C A G   | -----             | A C T T A | --- G A     |
| Consensus (13364)                               | C C                         | T G T A                                 | T C C C T A T                         | G A                                     |                                     | A T A C A A C G A                       | T A T G C G G A A             |                   | A T A     | G A         |
|                                                 |                             |                                         |                                       |                                         |                                     |                                         |                               |                   |           | Section 163 |
| (13447)                                         | 13447                       | 13460                                   | 13470                                 | 13480                                   | 13490                               | 13500                                   | 13510                         | 13529             |           |             |
| K12 Zwischenstück 255.328 - 290.948 (13224)     | T G A T A A A A T G         | T T C A T C C A C G                     | G T C A G C G C C                     | C G G T C A T C G G C                   | C T T A A T C A G C                 | C A C A G T A C                         | --- C A G G T C G A G G C G   | A G G - A A G C T |           |             |
| SARS-CoV-2 Reference Genome NC_045512.2 (10588) | A G G T A A C T             | --- T T T A T G G A C C                 | T T T G T T G A C A G G               | C A A A C A G C A C                     | A A G C A G C                       | T G - - G T A C                         | G G A C A C A A C T A T T A C | A G T T A A T G T |           |             |
| Consensus (13447)                               | G T A A                     | T T A T                                 | A C C T G                             | C G C A                                 | C A A C A G C                       | G T A C                                 | C A C A C A                   | A G A A T         |           |             |
|                                                 |                             |                                         |                                       |                                         |                                     |                                         |                               |                   |           | Section 164 |
| (13530)                                         | 13530                       | 13540                                   | 13550                                 | 13560                                   | 13570                               | 13580                                   | 13590                         | 13600             | 13612     |             |
| K12 Zwischenstück 255.328 - 290.948 (13303)     | G T T C G C                 | -- G G T A C A G C G C A G C A T A C T  | C G G T A T C G C G A G C             | C C A C T T T C G                       | C C C A C G C C G G G C             | A G A T C C A T C A G C                 | G T T A T A T A G C           |                   |           |             |
| SARS-CoV-2 Reference Genome NC_045512.2 (10666) | T T T A G C                 | T T G G T T G T A C G T G C             | - T G T T A T A A A T G G A G A C A G | G T G G T T T T C T C A A T C G         | -----                               | A T T A C C A C A C T C T               | T T A T A T G A C             |                   |           |             |
| Consensus (13530)                               | T T G C                     | G G T C G C G C T T                     | A T G G A G                           | T T T C C                               | C G                                 | A T C C A C                             | T A T G A C                   |                   |           |             |
|                                                 |                             |                                         |                                       |                                         |                                     |                                         |                               |                   |           | Section 165 |
| (13613)                                         | 13613                       | 13620                                   | 13630                                 | 13640                                   | 13650                               | 13660                                   | 13670                         | 13680             | 13695     |             |
| K12 Zwischenstück 255.328 - 290.948 (13384)     | G G T C G C C G A C T T G C | A G G C G A A A G C G C A G T           | G G C T C A C G T G T A               | - C A G G C C G C C A C A T C           | G C T G A C C G G T G A T A T A T C | T C C G G C A A A                       |                               |                   |           |             |
| SARS-CoV-2 Reference Genome NC_045512.2 (10742) | T T T A A C C T T G T G G C | T A T G - - A A G T A C A A T A T A G A | A C T C T A A C A C A A G A           | C C A T G T T G A C A T A G A C C       | T C T T C T G C T C A A             |                                         |                               |                   |           |             |
| Consensus (13613)                               | T C C T G C                 | A A G C A T                             | A C T T A C A                         | C C A T G                               | C G A T T T C G                     | A A                                     |                               |                   |           |             |
|                                                 |                             |                                         |                                       |                                         |                                     |                                         |                               |                   |           | Section 166 |
| (13696)                                         | 13696                       | 13710                                   | 13720                                 | 13730                                   | 13740                               | 13750                                   | 13760                         | 13778             |           |             |
| K12 Zwischenstück 255.328 - 290.948 (13466)     | C A G G G C A T T G C       | A C - - - - A G A C T G C T C T T C C   | - C A A C A C C G G T T T A C C       | - C A T A A T G C C G A T C A T G G C T | C G T A G T T A G T T A A C T       |                                         |                               |                   |           |             |
| SARS-CoV-2 Reference Genome NC_045512.2 (10823) | A C T G G A A T T G C       | C G T T T T A G A T A T G T G T G G T T | C A T T A A A A G A A T T A C T G     | C A A A A T G G T - A T G A A T G G A   | - C G T A C C A T A T T G G G T     |                                         |                               |                   |           |             |
| Consensus (13696)                               | G G A T T G C               | A G A T T G T T C                       | C A A G                               | C A A A T G                             | A T A T G G                         | C G T A                                 | T T T                         |                   |           |             |
|                                                 |                             |                                         |                                       |                                         |                                     |                                         |                               |                   |           | Section 167 |
| (13779)                                         | 13779                       | 13790                                   | 13800                                 | 13810                                   | 13820                               | 13830                                   | 13840                         | 13850             | 13861     |             |
| K12 Zwischenstück 255.328 - 290.948 (13543)     | G G T T A A T T T G C T G C | A G A A G C C G C T C T G A T A C C     | C A T T G C G G C A G A T C A G       | C A A G C G A T T G C T G A A A C G A C | T T C A A A C C T T C A G           | --                                      |                               |                   |           |             |
| SARS-CoV-2 Reference Genome NC_045512.2 (10904) | A G T G C - T T T A T T     | - - A G A A G A T G A A T T A C A C C   | T T T T G A T G T T G T T A G A       | C A A T G C T C A G G T G T T A C T     | - - T T C A A A G T G C A G         | T G                                     |                               |                   |           |             |
| Consensus (13779)                               | G T T T T                   | T A G A A G G                           | T A A C C T T G                       | G G T C A A                             | G T G A C                           | T T C A A T C A G                       |                               |                   |           |             |
|                                                 |                             |                                         |                                       |                                         |                                     |                                         |                               |                   |           | Section 168 |
| (13862)                                         | 13862                       | 13870                                   | 13880                                 | 13890                                   | 13900                               | 13910                                   | 13920                         | 13930             | 13944     |             |
| K12 Zwischenstück 255.328 - 290.948 (13624)     | - A A T T A T T C A T C A   | C - - - - - T A C T C C T C T G         | A A A A A T A A T A A A A A           | - - C G T A G A A T C G T G A G A       | T T C C G C G T T A A T             | T G C G T A T G                         |                               |                   |           |             |
| SARS-CoV-2 Reference Genome NC_045512.2 (10982) | A A A G A A C A A T C A     | A G G G T A C A C A C C A C T G         | G T T G T A C T C A C A A             | T T T T G A C T T C A C T T T A G T     | T T T A G T C C A G A G             | T A C T C A A T G                       |                               |                   |           |             |
| Consensus (13862)                               | A A A A T C A               | A C C C T G                             | T A T A A A G                         | A T A G T T G C                         | A T A T                             | A T G                                   |                               |                   |           |             |



Sars-CoV-2 & E.coli K12 Zwischenstück.epr.apr

|                                     |         |             |       |       |       |       |       |       |       |       |   |   |   |   |   |   |   |   |   |   |   |   |   |   |   |   |   |   |   |   |   |   |   |   |   |   |   |   |   |   |   |   |   |   |   |   |   |   |   |   |   |   |   |   |   |   |   |   |   |   |   |   |   |   |   |   |   |   |   |   |   |   |   |   |   |   |   |   |   |   |   |   |   |   |   |   |   |   |   |   |   |   |   |   |   |   |   |   |   |   |   |   |   |   |   |   |   |   |   |   |   |   |   |   |   |   |   |   |   |   |   |   |   |   |   |   |   |   |   |   |   |   |   |   |   |   |   |   |   |   |   |   |   |   |   |   |   |   |   |   |   |   |   |   |   |   |   |   |   |   |   |   |   |   |   |   |   |   |   |   |   |   |   |   |   |   |   |   |   |   |   |   |   |   |   |   |   |   |   |   |   |   |   |   |   |   |   |   |   |   |   |   |   |   |   |   |   |   |   |   |   |   |   |   |   |   |   |   |   |   |   |   |   |   |   |   |   |   |   |   |   |   |   |   |   |   |   |   |   |   |   |   |   |   |   |   |   |   |   |   |   |   |   |   |   |   |   |   |   |   |   |   |   |   |   |   |   |   |   |   |   |   |   |   |   |   |   |   |   |   |   |   |   |   |   |   |   |   |   |   |   |   |   |   |   |   |   |   |   |   |   |   |   |   |   |   |   |   |   |   |   |   |   |   |   |   |   |   |   |   |   |   |   |   |   |   |   |   |   |   |   |   |   |   |   |   |   |   |   |   |   |   |   |   |   |   |   |   |   |   |   |   |   |   |   |   |   |   |   |   |   |   |   |   |   |   |   |   |   |   |   |   |   |   |   |   |   |   |   |   |   |   |   |   |   |   |   |   |   |   |   |   |   |   |   |   |   |   |   |   |   |   |   |   |   |   |   |   |   |   |   |   |   |   |   |   |   |   |   |   |   |   |   |   |   |   |   |   |   |   |   |   |   |   |   |   |   |   |   |   |   |   |   |   |   |   |   |   |   |   |   |   |   |   |   |   |   |   |   |   |   |   |   |   |   |   |   |   |   |   |   |   |   |   |   |   |   |   |   |   |   |   |   |   |   |   |   |   |   |   |   |   |   |   |   |   |   |   |   |   |   |   |   |   |   |   |   |   |   |   |   |   |   |   |   |   |   |   |   |   |   |   |   |   |   |   |   |   |   |   |   |   |   |   |   |   |   |   |   |   |   |   |   |   |   |   |   |   |   |   |   |   |   |   |   |   |   |   |   |   |   |   |   |   |   |   |   |   |   |   |   |   |   |   |   |   |   |   |   |   |   |   |   |   |   |   |   |   |   |   |   |   |   |   |   |   |   |   |   |   |   |   |   |   |   |   |   |   |   |   |   |   |   |   |   |   |   |   |   |   |   |   |   |   |   |   |   |   |   |   |   |   |   |   |   |   |   |   |   |   |   |   |   |   |   |   |   |   |   |   |   |   |   |   |   |   |   |   |   |   |   |   |   |   |   |   |   |   |   |   |   |   |   |   |   |   |   |   |   |   |   |   |   |   |   |   |   |   |   |   |   |   |   |   |   |   |   |   |   |   |   |   |   |   |   |   |   |   |   |   |   |   |   |   |   |   |   |   |   |   |   |   |   |   |   |   |   |   |   |   |   |   |   |   |   |   |   |   |   |   |   |   |   |   |   |   |   |   |   |   |   |   |   |   |   |   |   |   |   |   |   |   |   |   |   |   |   |   |   |   |   |   |   |   |   |   |   |   |   |   |   |   |   |   |   |   |   |   |   |   |   |   |   |   |   |   |   |   |   |   |   |   |   |   |   |   |   |   |   |   |   |   |   |   |   |   |   |   |   |   |   |   |   |   |   |   |   |   |   |   |   |   |   |   |   |   |   |   |   |   |   |   |   |   |   |   |   |   |   |   |   |   |   |   |   |   |   |   |   |   |   |   |   |   |   |   |   |   |   |   |   |   |   |   |   |   |   |   |   |   |   |   |   |   |   |   |   |   |   |   |   |   |   |   |   |   |   |   |   |   |   |   |   |   |   |   |   |   |   |   |   |   |   |   |   |   |   |   |   |   |   |   |   |   |   |   |   |   |   |   |   |   |   |   |   |   |   |   |   |   |   |   |   |   |   |   |   |   |   |   |   |   |   |   |   |   |   |   |   |   |   |   |   |   |   |   |   |   |   |   |   |   |   |   |   |   |   |   |   |   |   |   |   |   |   |   |   |   |   |   |   |   |   |   |   |   |   |   |   |   |   |   |   |   |   |   |   |   |   |   |   |   |   |   |   |   |   |   |   |   |   |   |   |   |   |   |   |   |   |   |   |   |   |   |   |   |   |   |   |   |   |   |   |   |   |   |   |   |   |   |   |   |   |   |   |   |   |   |   |   |   |   |   |   |   |   |   |   |   |   |   |   |   |   |   |   |   |   |   |   |   |   |   |   |   |   |   |   |   |   |   |   |   |   |   |   |   |   |   |   |   |   |   |   |   |   |   |   |   |   |   |   |   |   |   |   |   |   |   |   |   |   |   |   |   |   |   |   |   |   |   |   |   |   |   |   |   |   |   |   |   |   |   |   |   |   |   |   |   |   |   |   |   |   |   |   |   |   |   |   |   |   |   |   |   |   |   |   |   |   |   |   |   |   |   |   |   |   |   |   |   |   |   |   |   |   |   |   |   |   |   |   |   |   |   |   |   |   |   |   |   |   |   |   |   |   |   |   |   |   |   |   |   |   |   |   |   |   |   |   |   |   |   |   |   |   |   |   |   |   |   |   |   |   |   |   |   |   |   |   |   |   |   |   |   |   |   |   |   |   |   |   |   |   |   |   |   |   |   |   |   |   |   |   |   |   |   |   |   |   |   |   |   |   |   |   |   |   |   |   |   |   |   |   |   |   |   |   |   |   |   |   |   |   |
|-------------------------------------|---------|-------------|-------|-------|-------|-------|-------|-------|-------|-------|---|---|---|---|---|---|---|---|---|---|---|---|---|---|---|---|---|---|---|---|---|---|---|---|---|---|---|---|---|---|---|---|---|---|---|---|---|---|---|---|---|---|---|---|---|---|---|---|---|---|---|---|---|---|---|---|---|---|---|---|---|---|---|---|---|---|---|---|---|---|---|---|---|---|---|---|---|---|---|---|---|---|---|---|---|---|---|---|---|---|---|---|---|---|---|---|---|---|---|---|---|---|---|---|---|---|---|---|---|---|---|---|---|---|---|---|---|---|---|---|---|---|---|---|---|---|---|---|---|---|---|---|---|---|---|---|---|---|---|---|---|---|---|---|---|---|---|---|---|---|---|---|---|---|---|---|---|---|---|---|---|---|---|---|---|---|---|---|---|---|---|---|---|---|---|---|---|---|---|---|---|---|---|---|---|---|---|---|---|---|---|---|---|---|---|---|---|---|---|---|---|---|---|---|---|---|---|---|---|---|---|---|---|---|---|---|---|---|---|---|---|---|---|---|---|---|---|---|---|---|---|---|---|---|---|---|---|---|---|---|---|---|---|---|---|---|---|---|---|---|---|---|---|---|---|---|---|---|---|---|---|---|---|---|---|---|---|---|---|---|---|---|---|---|---|---|---|---|---|---|---|---|---|---|---|---|---|---|---|---|---|---|---|---|---|---|---|---|---|---|---|---|---|---|---|---|---|---|---|---|---|---|---|---|---|---|---|---|---|---|---|---|---|---|---|---|---|---|---|---|---|---|---|---|---|---|---|---|---|---|---|---|---|---|---|---|---|---|---|---|---|---|---|---|---|---|---|---|---|---|---|---|---|---|---|---|---|---|---|---|---|---|---|---|---|---|---|---|---|---|---|---|---|---|---|---|---|---|---|---|---|---|---|---|---|---|---|---|---|---|---|---|---|---|---|---|---|---|---|---|---|---|---|---|---|---|---|---|---|---|---|---|---|---|---|---|---|---|---|---|---|---|---|---|---|---|---|---|---|---|---|---|---|---|---|---|---|---|---|---|---|---|---|---|---|---|---|---|---|---|---|---|---|---|---|---|---|---|---|---|---|---|---|---|---|---|---|---|---|---|---|---|---|---|---|---|---|---|---|---|---|---|---|---|---|---|---|---|---|---|---|---|---|---|---|---|---|---|---|---|---|---|---|---|---|---|---|---|---|---|---|---|---|---|---|---|---|---|---|---|---|---|---|---|---|---|---|---|---|---|---|---|---|---|---|---|---|---|---|---|---|---|---|---|---|---|---|---|---|---|---|---|---|---|---|---|---|---|---|---|---|---|---|---|---|---|---|---|---|---|---|---|---|---|---|---|---|---|---|---|---|---|---|---|---|---|---|---|---|---|---|---|---|---|---|---|---|---|---|---|---|---|---|---|---|---|---|---|---|---|---|---|---|---|---|---|---|---|---|---|---|---|---|---|---|---|---|---|---|---|---|---|---|---|---|---|---|---|---|---|---|---|---|---|---|---|---|---|---|---|---|---|---|---|---|---|---|---|---|---|---|---|---|---|---|---|---|---|---|---|---|---|---|---|---|---|---|---|---|---|---|---|---|---|---|---|---|---|---|---|---|---|---|---|---|---|---|---|---|---|---|---|---|---|---|---|---|---|---|---|---|---|---|---|---|---|---|---|---|---|---|---|---|---|---|---|---|---|---|---|---|---|---|---|---|---|---|---|---|---|---|---|---|---|---|---|---|---|---|---|---|---|---|---|---|---|---|---|---|---|---|---|---|---|---|---|---|---|---|---|---|---|---|---|---|---|---|---|---|---|---|---|---|---|---|---|---|---|---|---|---|---|---|---|---|---|---|---|---|---|---|---|---|---|---|---|---|---|---|---|---|---|---|---|---|---|---|---|---|---|---|---|---|---|---|---|---|---|---|---|---|---|---|---|---|---|---|---|---|---|---|---|---|---|---|---|---|---|---|---|---|---|---|---|---|---|---|---|---|---|---|---|---|---|---|---|---|---|---|---|---|---|---|---|---|---|---|---|---|---|---|---|---|---|---|---|---|---|---|---|---|---|---|---|---|---|---|---|---|---|---|---|---|---|---|---|---|---|---|---|---|---|---|---|---|---|---|---|---|---|---|---|---|---|---|---|---|---|---|---|---|---|---|---|---|---|---|---|---|---|---|---|---|---|---|---|---|---|---|---|---|---|---|---|---|---|---|---|---|---|---|---|---|---|---|---|---|---|---|---|---|---|---|---|---|---|---|---|---|---|---|---|---|---|---|---|---|---|---|---|---|---|---|---|---|---|---|---|---|---|---|---|---|---|---|---|---|---|---|---|---|---|---|---|---|---|---|---|---|---|---|---|---|---|---|---|---|---|---|---|---|---|---|---|---|---|---|---|---|---|---|---|---|---|---|---|---|---|---|---|---|---|---|---|---|---|---|---|---|---|---|---|---|---|---|---|---|---|---|---|---|---|---|---|---|---|---|---|---|---|---|---|---|---|---|---|---|---|---|---|---|---|---|---|---|---|---|---|---|---|---|---|---|---|---|---|---|---|---|---|---|---|---|---|---|---|---|---|---|---|---|---|---|---|---|---|---|---|---|---|---|---|---|---|---|---|---|---|---|---|---|---|---|---|---|---|---|---|---|---|---|---|---|---|---|---|---|---|---|---|---|---|---|---|---|---|---|---|---|---|---|---|---|---|---|---|---|---|---|---|---|---|---|---|---|---|---|---|---|---|---|---|---|---|---|---|---|---|---|---|---|---|---|---|---|---|---|---|---|---|---|---|---|---|---|---|---|---|---|---|---|---|---|---|---|---|---|---|---|---|---|---|---|---|---|---|---|---|---|---|---|---|---|---|---|---|---|---|---|---|---|---|---|---|---|---|---|---|---|---|---|---|---|---|---|---|---|---|---|---|---|---|---|---|
|                                     |         | Section 169 |       |       |       |       |       |       |       |       |   |   |   |   |   |   |   |   |   |   |   |   |   |   |   |   |   |   |   |   |   |   |   |   |   |   |   |   |   |   |   |   |   |   |   |   |   |   |   |   |   |   |   |   |   |   |   |   |   |   |   |   |   |   |   |   |   |   |   |   |   |   |   |   |   |   |   |   |   |   |   |   |   |   |   |   |   |   |   |   |   |   |   |   |   |   |   |   |   |   |   |   |   |   |   |   |   |   |   |   |   |   |   |   |   |   |   |   |   |   |   |   |   |   |   |   |   |   |   |   |   |   |   |   |   |   |   |   |   |   |   |   |   |   |   |   |   |   |   |   |   |   |   |   |   |   |   |   |   |   |   |   |   |   |   |   |   |   |   |   |   |   |   |   |   |   |   |   |   |   |   |   |   |   |   |   |   |   |   |   |   |   |   |   |   |   |   |   |   |   |   |   |   |   |   |   |   |   |   |   |   |   |   |   |   |   |   |   |   |   |   |   |   |   |   |   |   |   |   |   |   |   |   |   |   |   |   |   |   |   |   |   |   |   |   |   |   |   |   |   |   |   |   |   |   |   |   |   |   |   |   |   |   |   |   |   |   |   |   |   |   |   |   |   |   |   |   |   |   |   |   |   |   |   |   |   |   |   |   |   |   |   |   |   |   |   |   |   |   |   |   |   |   |   |   |   |   |   |   |   |   |   |   |   |   |   |   |   |   |   |   |   |   |   |   |   |   |   |   |   |   |   |   |   |   |   |   |   |   |   |   |   |   |   |   |   |   |   |   |   |   |   |   |   |   |   |   |   |   |   |   |   |   |   |   |   |   |   |   |   |   |   |   |   |   |   |   |   |   |   |   |   |   |   |   |   |   |   |   |   |   |   |   |   |   |   |   |   |   |   |   |   |   |   |   |   |   |   |   |   |   |   |   |   |   |   |   |   |   |   |   |   |   |   |   |   |   |   |   |   |   |   |   |   |   |   |   |   |   |   |   |   |   |   |   |   |   |   |   |   |   |   |   |   |   |   |   |   |   |   |   |   |   |   |   |   |   |   |   |   |   |   |   |   |   |   |   |   |   |   |   |   |   |   |   |   |   |   |   |   |   |   |   |   |   |   |   |   |   |   |   |   |   |   |   |   |   |   |   |   |   |   |   |   |   |   |   |   |   |   |   |   |   |   |   |   |   |   |   |   |   |   |   |   |   |   |   |   |   |   |   |   |   |   |   |   |   |   |   |   |   |   |   |   |   |   |   |   |   |   |   |   |   |   |   |   |   |   |   |   |   |   |   |   |   |   |   |   |   |   |   |   |   |   |   |   |   |   |   |   |   |   |   |   |   |   |   |   |   |   |   |   |   |   |   |   |   |   |   |   |   |   |   |   |   |   |   |   |   |   |   |   |   |   |   |   |   |   |   |   |   |   |   |   |   |   |   |   |   |   |   |   |   |   |   |   |   |   |   |   |   |   |   |   |   |   |   |   |   |   |   |   |   |   |   |   |   |   |   |   |   |   |   |   |   |   |   |   |   |   |   |   |   |   |   |   |   |   |   |   |   |   |   |   |   |   |   |   |   |   |   |   |   |   |   |   |   |   |   |   |   |   |   |   |   |   |   |   |   |   |   |   |   |   |   |   |   |   |   |   |   |   |   |   |   |   |   |   |   |   |   |   |   |   |   |   |   |   |   |   |   |   |   |   |   |   |   |   |   |   |   |   |   |   |   |   |   |   |   |   |   |   |   |   |   |   |   |   |   |   |   |   |   |   |   |   |   |   |   |   |   |   |   |   |   |   |   |   |   |   |   |   |   |   |   |   |   |   |   |   |   |   |   |   |   |   |   |   |   |   |   |   |   |   |   |   |   |   |   |   |   |   |   |   |   |   |   |   |   |   |   |   |   |   |   |   |   |   |   |   |   |   |   |   |   |   |   |   |   |   |   |   |   |   |   |   |   |   |   |   |   |   |   |   |   |   |   |   |   |   |   |   |   |   |   |   |   |   |   |   |   |   |   |   |   |   |   |   |   |   |   |   |   |   |   |   |   |   |   |   |   |   |   |   |   |   |   |   |   |   |   |   |   |   |   |   |   |   |   |   |   |   |   |   |   |   |   |   |   |   |   |   |   |   |   |   |   |   |   |   |   |   |   |   |   |   |   |   |   |   |   |   |   |   |   |   |   |   |   |   |   |   |   |   |   |   |   |   |   |   |   |   |   |   |   |   |   |   |   |   |   |   |   |   |   |   |   |   |   |   |   |   |   |   |   |   |   |   |   |   |   |   |   |   |   |   |   |   |   |   |   |   |   |   |   |   |   |   |   |   |   |   |   |   |   |   |   |   |   |   |   |   |   |   |   |   |   |   |   |   |   |   |   |   |   |   |   |   |   |   |   |   |   |   |   |   |   |   |   |   |   |   |   |   |   |   |   |   |   |   |   |   |   |   |   |   |   |   |   |   |   |   |   |   |   |   |   |   |   |   |   |   |   |   |   |   |   |   |   |   |   |   |   |   |   |   |   |   |   |   |   |   |   |   |   |   |   |   |   |   |   |   |   |   |   |   |   |   |   |   |   |   |   |   |   |   |   |   |   |   |   |   |   |   |   |   |   |   |   |   |   |   |   |   |   |   |   |   |   |   |   |   |   |   |   |   |   |   |   |   |   |   |   |   |   |   |   |   |   |   |   |   |   |   |   |   |   |   |   |   |   |   |   |   |   |   |   |   |   |   |   |   |   |   |   |   |   |   |   |   |   |   |   |   |   |   |   |   |   |   |   |   |   |   |   |   |   |   |   |   |   |   |   |   |   |   |   |   |   |   |   |   |   |   |   |   |   |   |   |   |   |   |   |   |   |   |   |   |   |   |   |   |   |   |   |   |   |   |   |   |   |   |   |   |   |   |   |   |   |   |   |   |   |   |
|                                     | (13945) | 13945       | 13950 | 13960 | 13970 | 13980 | 13990 | 14000 | 14010 | 14027 |   |   |   |   |   |   |   |   |   |   |   |   |   |   |   |   |   |   |   |   |   |   |   |   |   |   |   |   |   |   |   |   |   |   |   |   |   |   |   |   |   |   |   |   |   |   |   |   |   |   |   |   |   |   |   |   |   |   |   |   |   |   |   |   |   |   |   |   |   |   |   |   |   |   |   |   |   |   |   |   |   |   |   |   |   |   |   |   |   |   |   |   |   |   |   |   |   |   |   |   |   |   |   |   |   |   |   |   |   |   |   |   |   |   |   |   |   |   |   |   |   |   |   |   |   |   |   |   |   |   |   |   |   |   |   |   |   |   |   |   |   |   |   |   |   |   |   |   |   |   |   |   |   |   |   |   |   |   |   |   |   |   |   |   |   |   |   |   |   |   |   |   |   |   |   |   |   |   |   |   |   |   |   |   |   |   |   |   |   |   |   |   |   |   |   |   |   |   |   |   |   |   |   |   |   |   |   |   |   |   |   |   |   |   |   |   |   |   |   |   |   |   |   |   |   |   |   |   |   |   |   |   |   |   |   |   |   |   |   |   |   |   |   |   |   |   |   |   |   |   |   |   |   |   |   |   |   |   |   |   |   |   |   |   |   |   |   |   |   |   |   |   |   |   |   |   |   |   |   |   |   |   |   |   |   |   |   |   |   |   |   |   |   |   |   |   |   |   |   |   |   |   |   |   |   |   |   |   |   |   |   |   |   |   |   |   |   |   |   |   |   |   |   |   |   |   |   |   |   |   |   |   |   |   |   |   |   |   |   |   |   |   |   |   |   |   |   |   |   |   |   |   |   |   |   |   |   |   |   |   |   |   |   |   |   |   |   |   |   |   |   |   |   |   |   |   |   |   |   |   |   |   |   |   |   |   |   |   |   |   |   |   |   |   |   |   |   |   |   |   |   |   |   |   |   |   |   |   |   |   |   |   |   |   |   |   |   |   |   |   |   |   |   |   |   |   |   |   |   |   |   |   |   |   |   |   |   |   |   |   |   |   |   |   |   |   |   |   |   |   |   |   |   |   |   |   |   |   |   |   |   |   |   |   |   |   |   |   |   |   |   |   |   |   |   |   |   |   |   |   |   |   |   |   |   |   |   |   |   |   |   |   |   |   |   |   |   |   |   |   |   |   |   |   |   |   |   |   |   |   |   |   |   |   |   |   |   |   |   |   |   |   |   |   |   |   |   |   |   |   |   |   |   |   |   |   |   |   |   |   |   |   |   |   |   |   |   |   |   |   |   |   |   |   |   |   |   |   |   |   |   |   |   |   |   |   |   |   |   |   |   |   |   |   |   |   |   |   |   |   |   |   |   |   |   |   |   |   |   |   |   |   |   |   |   |   |   |   |   |   |   |   |   |   |   |   |   |   |   |   |   |   |   |   |   |   |   |   |   |   |   |   |   |   |   |   |   |   |   |   |   |   |   |   |   |   |   |   |   |   |   |   |   |   |   |   |   |   |   |   |   |   |   |   |   |   |   |   |   |   |   |   |   |   |   |   |   |   |   |   |   |   |   |   |   |   |   |   |   |   |   |   |   |   |   |   |   |   |   |   |   |   |   |   |   |   |   |   |   |   |   |   |   |   |   |   |   |   |   |   |   |   |   |   |   |   |   |   |   |   |   |   |   |   |   |   |   |   |   |   |   |   |   |   |   |   |   |   |   |   |   |   |   |   |   |   |   |   |   |   |   |   |   |   |   |   |   |   |   |   |   |   |   |   |   |   |   |   |   |   |   |   |   |   |   |   |   |   |   |   |   |   |   |   |   |   |   |   |   |   |   |   |   |   |   |   |   |   |   |   |   |   |   |   |   |   |   |   |   |   |   |   |   |   |   |   |   |   |   |   |   |   |   |   |   |   |   |   |   |   |   |   |   |   |   |   |   |   |   |   |   |   |   |   |   |   |   |   |   |   |   |   |   |   |   |   |   |   |   |   |   |   |   |   |   |   |   |   |   |   |   |   |   |   |   |   |   |   |   |   |   |   |   |   |   |   |   |   |   |   |   |   |   |   |   |   |   |   |   |   |   |   |   |   |   |   |   |   |   |   |   |   |   |   |   |   |   |   |   |   |   |   |   |   |   |   |   |   |   |   |   |   |   |   |   |   |   |   |   |   |   |   |   |   |   |   |   |   |   |   |   |   |   |   |   |   |   |   |   |   |   |   |   |   |   |   |   |   |   |   |   |   |   |   |   |   |   |   |   |   |   |   |   |   |   |   |   |   |   |   |   |   |   |   |   |   |   |   |   |   |   |   |   |   |   |   |   |   |   |   |   |   |   |   |   |   |   |   |   |   |   |   |   |   |   |   |   |   |   |   |   |   |   |   |   |   |   |   |   |   |   |   |   |   |   |   |   |   |   |   |   |   |   |   |   |   |   |   |   |   |   |   |   |   |   |   |   |   |   |   |   |   |   |   |   |   |   |   |   |   |   |   |   |   |   |   |   |   |   |   |   |   |   |   |   |   |   |   |   |   |   |   |   |   |   |   |   |   |   |   |   |   |   |   |   |   |   |   |   |   |   |   |   |   |   |   |   |   |   |   |   |   |   |   |   |   |   |   |   |   |   |   |   |   |   |   |   |   |   |   |   |   |   |   |   |   |   |   |   |   |   |   |   |   |   |   |   |   |   |   |   |   |   |   |   |   |   |   |   |   |   |   |   |   |   |   |   |   |   |   |   |   |   |   |   |   |   |   |   |   |   |   |   |   |   |   |   |   |   |   |   |   |   |   |   |   |   |   |   |   |   |   |   |   |   |   |   |   |   |   |   |   |   |   |   |   |   |   |   |   |   |   |   |   |   |   |   |   |   |   |   |   |   |   |   |   |   |   |   |   |   |   |   |   |   |   |   |   |   |   |   |   |   |   |   |   |   |   |   |   |   |   |   |   |
| K12 Zwischenstück 255.328 - 290.948 | (13699) | T           | TC    | AGA   | GT    | GA    | T     | GA    | T     | A     | T | A | T | A | T | C | T | G | A | A | G | A | T | T | T | T | T | T | T | T | T | T | T | T | T | T | T | T | T | T | T | T | T | T | T | T | T | T | T | T | T | T | T | T | T | T | T | T | T | T | T | T | T | T | T | T | T | T | T | T | T | T | T | T | T | T | T | T | T | T | T | T | T | T | T | T | T | T | T | T | T | T | T | T | T | T | T | T | T | T | T | T | T | T | T | T | T | T | T | T | T | T | T | T | T | T | T | T | T | T | T | T | T | T | T | T | T | T | T | T | T | T | T | T | T | T | T | T | T | T | T | T | T | T | T | T | T | T | T | T | T | T | T | T | T | T | T | T | T | T | T | T | T | T | T | T | T | T | T | T | T | T | T | T | T | T | T | T | T | T | T | T | T | T | T | T | T | T | T | T | T | T | T | T | T | T | T | T | T | T | T | T | T | T | T | T | T | T | T | T | T | T | T | T | T | T | T | T | T | T | T | T | T | T | T | T | T | T | T | T | T | T | T | T | T | T | T | T | T | T | T | T | T | T | T | T | T | T | T | T | T | T | T | T | T | T | T | T | T | T | T | T | T | T | T | T | T | T | T | T | T | T | T | T | T | T | T | T | T | T | T | T | T | T | T | T | T | T | T | T | T | T | T | T | T | T | T | T | T | T | T | T | T | T | T | T | T | T | T | T | T | T | T | T | T | T | T | T | T | T | T | T | T | T | T | T | T | T | T | T | T | T | T | T | T | T | T | T | T | T | T | T | T | T | T | T | T | T | T | T | T | T | T | T | T | T | T | T | T | T | T | T | T | T | T | T | T | T | T | T | T | T | T | T | T | T | T | T | T | T | T | T | T | T | T | T | T | T | T | T | T | T | T | T | T | T | T | T | T | T | T | T | T | T | T | T | T | T | T | T | T | T | T | T | T | T | T | T | T | T | T | T | T | T | T | T | T | T | T | T | T | T | T | T | T | T | T | T | T | T | T | T | T | T | T | T | T | T | T | T | T | T | T | T | T | T | T | T | T | T | T | T | T | T | T | T | T | T | T | T | T | T | T | T | T | T | T | T | T | T | T | T | T | T | T | T | T | T | T | T | T | T | T | T | T | T | T | T | T | T | T | T | T | T | T | T | T | T | T | T | T | T | T | T | T | T | T | T | T | T | T | T | T | T | T | T | T | T | T | T | T | T | T | T | T | T | T | T | T | T | T | T | T | T | T | T | T | T | T | T | T | T | T | T | T | T | T | T | T | T | T | T | T | T | T | T | T | T | T | T | T | T | T | T | T | T | T | T | T | T | T | T | T | T | T | T | T | T | T | T | T | T | T | T | T | T | T | T | T | T | T | T | T | T | T | T | T | T | T | T | T | T | T | T | T | T | T | T | T | T | T | T | T | T | T | T | T | T | T | T | T | T | T | T | T | T | T | T | T | T | T | T | T | T | T | T | T | T | T | T | T | T | T | T | T | T | T | T | T | T | T | T | T | T | T | T | T | T | T | T | T | T | T | T | T | T | T | T | T | T | T | T | T | T | T | T | T | T | T | T | T | T | T | T | T | T | T | T | T | T | T | T | T | T | T | T | T | T | T | T | T | T | T | T | T | T | T | T | T | T | T | T | T | T | T | T | T | T | T | T | T | T | T | T | T | T | T | T | T | T | T | T | T | T | T | T | T | T | T | T | T | T | T | T | T | T | T | T | T | T | T | T | T | T | T | T | T | T | T | T | T | T | T | T | T | T | T | T | T | T | T | T | T | T | T | T | T | T | T | T | T | T | T | T | T | T | T | T | T | T | T | T | T | T | T | T | T | T | T | T | T | T | T | T | T | T | T | T | T | T | T | T | T | T | T | T | T | T | T | T | T | T | T | T | T | T | T | T | T | T | T | T | T | T | T | T | T | T | T | T | T | T | T | T | T | T | T | T | T | T | T | T | T | T | T | T | T | T | T | T | T | T | T | T | T | T | T | T | T | T | T | T | T | T | T | T | T | T | T | T | T | T | T | T | T | T | T | T | T | T | T | T | T | T | T | T | T | T | T | T | T | T | T | T | T | T | T | T | T | T | T | T | T | T | T | T | T | T | T | T | T | T | T | T | T | T | T | T | T | T | T | T | T | T | T | T | T | T | T | T | T | T | T | T | T | T | T | T | T | T | T | T | T | T | T | T | T | T | T | T | T | T | T | T | T | T | T | T | T | T | T | T | T | T | T | T | T | T | T | T | T | T | T | T | T | T | T | T | T | T | T | T | T | T | T | T | T | T | T | T | T | T | T | T | T | T | T | T | T | T | T | T | T | T | T | T | T | T | T | T | T | T | T | T | T | T | T | T | T | T | T | T | T | T | T | T | T | T | T | T | T | T | T | T | T | T | T | T | T | T | T | T | T | T | T | T | T | T | T | T | T | T | T | T | T | T | T | T | T | T | T | T | T | T | T | T | T | T | T | T | T | T | T | T | T | T | T | T | T | T | T | T | T | T | T | T | T | T | T | T | T | T | T | T | T | T | T | T | T | T | T | T | T | T | T | T | T | T | T | T | T | T | T | T | T | T | T | T | T | T | T | T | T | T | T | T | T | T | T | T | T | T | T | T | T | T | T | T | T | T | T | T | T | T | T | T | T | T | T | T | T | T | T | T | T | T | T | T | T | T | T | T | T | T | T | T | T | T | T | T | T | T | T | T | T | T | T | T | T | T | T | T | T | T | T | T | T | T | T | T | T | T | T | T | T | T | T | T | T | T | T | T | T | T | T | T | T | T | T | T | T | T | T | T | T | T | T | T | T | T | T | T | T | T | T | T | T | T | T | T | T | T | T | T | T | T | T | T | T | T | T | T | T | T | T | T | T | T | T | T | T | T | T | T | T | T | T | T | T | T | T | T | T | T | T | T | T | T | T | T | T | T | T | T |

Sars-CoV-2 & E.coli K12 Zwischenstück.eapr.apr

|                                                 |  |  |  |  |  |  |  |  |  |  |  |  |  |  |                                                                                        |       |  |  |  |  |  |       |  |  |  |  |  |       |  |  |  |  |  |       |  |  |  |  |  |       |  |  |  |  |  |       |  |  |  |  |  |       |  |  |  |  |  |       |  |  |  |  |  |       |
|-------------------------------------------------|--|--|--|--|--|--|--|--|--|--|--|--|--|--|----------------------------------------------------------------------------------------|-------|--|--|--|--|--|-------|--|--|--|--|--|-------|--|--|--|--|--|-------|--|--|--|--|--|-------|--|--|--|--|--|-------|--|--|--|--|--|-------|--|--|--|--|--|-------|--|--|--|--|--|-------|
|                                                 |  |  |  |  |  |  |  |  |  |  |  |  |  |  | Section 176                                                                            |       |  |  |  |  |  |       |  |  |  |  |  |       |  |  |  |  |  |       |  |  |  |  |  |       |  |  |  |  |  |       |  |  |  |  |  |       |  |  |  |  |  |       |  |  |  |  |  |       |
|                                                 |  |  |  |  |  |  |  |  |  |  |  |  |  |  | (14526)                                                                                | 14526 |  |  |  |  |  | 14540 |  |  |  |  |  | 14550 |  |  |  |  |  | 14560 |  |  |  |  |  | 14570 |  |  |  |  |  | 14580 |  |  |  |  |  | 14590 |  |  |  |  |  | 14608 |  |  |  |  |  |       |
| K12 Zwischenstück 255.328 - 290.948 (14268)     |  |  |  |  |  |  |  |  |  |  |  |  |  |  | GTACAACTGCTACATTCGCACGTGAATTCGAACGCATAGAGGATCCTCTGGTTCTTTAGCCGCTCAGCCAGTTGGGGA         |       |  |  |  |  |  |       |  |  |  |  |  |       |  |  |  |  |  |       |  |  |  |  |  |       |  |  |  |  |  |       |  |  |  |  |  |       |  |  |  |  |  |       |  |  |  |  |  |       |
| SARS-CoV-2 Reference Genome NC_045512.2 (11598) |  |  |  |  |  |  |  |  |  |  |  |  |  |  | GTATAA-TGCTAGTTT-ATGTGTTCTTAGGGTATTTTGTGACTTGTTACTTTGGCCCTCTTTGTTTCTCAACCAGCTACTTTA    |       |  |  |  |  |  |       |  |  |  |  |  |       |  |  |  |  |  |       |  |  |  |  |  |       |  |  |  |  |  |       |  |  |  |  |  |       |  |  |  |  |  |       |  |  |  |  |  |       |
|                                                 |  |  |  |  |  |  |  |  |  |  |  |  |  |  | Consensus (14526) GTA AA TGC T A TG TC G C A T A G T CT TGG TCTTT G CTCA CC T A        |       |  |  |  |  |  |       |  |  |  |  |  |       |  |  |  |  |  |       |  |  |  |  |  |       |  |  |  |  |  |       |  |  |  |  |  |       |  |  |  |  |  |       |  |  |  |  |  |       |
|                                                 |  |  |  |  |  |  |  |  |  |  |  |  |  |  | Section 177                                                                            |       |  |  |  |  |  |       |  |  |  |  |  |       |  |  |  |  |  |       |  |  |  |  |  |       |  |  |  |  |  |       |  |  |  |  |  |       |  |  |  |  |  |       |  |  |  |  |  |       |
|                                                 |  |  |  |  |  |  |  |  |  |  |  |  |  |  | (14609)                                                                                | 14609 |  |  |  |  |  | 14620 |  |  |  |  |  | 14630 |  |  |  |  |  | 14640 |  |  |  |  |  | 14650 |  |  |  |  |  | 14660 |  |  |  |  |  | 14670 |  |  |  |  |  | 14680 |  |  |  |  |  | 14691 |
| K12 Zwischenstück 255.328 - 290.948 (14347)     |  |  |  |  |  |  |  |  |  |  |  |  |  |  | GA---ACACAGTGGCGTAAGTTTCCTCAACAG---CAGCGGGATCTTCTCATAGGGTGATGGGCGGGGTTCAC-CGTAGACTA    |       |  |  |  |  |  |       |  |  |  |  |  |       |  |  |  |  |  |       |  |  |  |  |  |       |  |  |  |  |  |       |  |  |  |  |  |       |  |  |  |  |  |       |  |  |  |  |  |       |
| SARS-CoV-2 Reference Genome NC_045512.2 (11679) |  |  |  |  |  |  |  |  |  |  |  |  |  |  | GACTGACTCT-TGGTGTTTATGATTACTTAGTTTCTACACAGGAGTTTAGATAATGAATTCAAGGGGACTACTCCCACCCAA     |       |  |  |  |  |  |       |  |  |  |  |  |       |  |  |  |  |  |       |  |  |  |  |  |       |  |  |  |  |  |       |  |  |  |  |  |       |  |  |  |  |  |       |  |  |  |  |  |       |
|                                                 |  |  |  |  |  |  |  |  |  |  |  |  |  |  | Consensus (14609) GA AC C TGG GT T TT AG C A G TT ATA AT C GGG AC C A C A              |       |  |  |  |  |  |       |  |  |  |  |  |       |  |  |  |  |  |       |  |  |  |  |  |       |  |  |  |  |  |       |  |  |  |  |  |       |  |  |  |  |  |       |  |  |  |  |  |       |
|                                                 |  |  |  |  |  |  |  |  |  |  |  |  |  |  | Section 178                                                                            |       |  |  |  |  |  |       |  |  |  |  |  |       |  |  |  |  |  |       |  |  |  |  |  |       |  |  |  |  |  |       |  |  |  |  |  |       |  |  |  |  |  |       |  |  |  |  |  |       |
|                                                 |  |  |  |  |  |  |  |  |  |  |  |  |  |  | (14692)                                                                                | 14692 |  |  |  |  |  | 14700 |  |  |  |  |  | 14710 |  |  |  |  |  | 14720 |  |  |  |  |  | 14730 |  |  |  |  |  | 14740 |  |  |  |  |  | 14750 |  |  |  |  |  | 14760 |  |  |  |  |  | 14774 |
| K12 Zwischenstück 255.328 - 290.948 (14423)     |  |  |  |  |  |  |  |  |  |  |  |  |  |  | TATCGAGATCAAAATCATCTGTCAAAACCGTGCAATTTCTGTGCTGGCTGAAAGTCGCAGATCGATGCTTGGGTCTCTACAGT    |       |  |  |  |  |  |       |  |  |  |  |  |       |  |  |  |  |  |       |  |  |  |  |  |       |  |  |  |  |  |       |  |  |  |  |  |       |  |  |  |  |  |       |  |  |  |  |  |       |
| SARS-CoV-2 Reference Genome NC_045512.2 (11761) |  |  |  |  |  |  |  |  |  |  |  |  |  |  | GAATAGCATAGATGCTCTCAAACCAAACTTAAATTTGTTGGGTGTGGTGCAAACCTTGTATCAAGTAGCCACTGTACAGT       |       |  |  |  |  |  |       |  |  |  |  |  |       |  |  |  |  |  |       |  |  |  |  |  |       |  |  |  |  |  |       |  |  |  |  |  |       |  |  |  |  |  |       |  |  |  |  |  |       |
|                                                 |  |  |  |  |  |  |  |  |  |  |  |  |  |  | Consensus (14692) A AT A C TC TCAA A T TT GTG TGG G AA C ATC A G T T GT                |       |  |  |  |  |  |       |  |  |  |  |  |       |  |  |  |  |  |       |  |  |  |  |  |       |  |  |  |  |  |       |  |  |  |  |  |       |  |  |  |  |  |       |  |  |  |  |  |       |
|                                                 |  |  |  |  |  |  |  |  |  |  |  |  |  |  | Section 179                                                                            |       |  |  |  |  |  |       |  |  |  |  |  |       |  |  |  |  |  |       |  |  |  |  |  |       |  |  |  |  |  |       |  |  |  |  |  |       |  |  |  |  |  |       |  |  |  |  |  |       |
|                                                 |  |  |  |  |  |  |  |  |  |  |  |  |  |  | (14775)                                                                                | 14775 |  |  |  |  |  | 14780 |  |  |  |  |  | 14790 |  |  |  |  |  | 14800 |  |  |  |  |  | 14810 |  |  |  |  |  | 14820 |  |  |  |  |  | 14830 |  |  |  |  |  | 14840 |  |  |  |  |  | 14857 |
| K12 Zwischenstück 255.328 - 290.948 (14506)     |  |  |  |  |  |  |  |  |  |  |  |  |  |  | ATGAACCTTACAAGAGCTGGTAAAAGCCATTGATGGGCAAAACTCGGTGCAGTATGAAGGCGCAAAGGCCTGGAATCATCAGC    |       |  |  |  |  |  |       |  |  |  |  |  |       |  |  |  |  |  |       |  |  |  |  |  |       |  |  |  |  |  |       |  |  |  |  |  |       |  |  |  |  |  |       |  |  |  |  |  |       |
| SARS-CoV-2 Reference Genome NC_045512.2 (11844) |  |  |  |  |  |  |  |  |  |  |  |  |  |  | CTAAATGTCT--AGATGTA--AAAGTGCACATCAGTAGTCTTACTCTCAAGTTTTCGCAACAACTCAGAG---TAGAATCATCATC |       |  |  |  |  |  |       |  |  |  |  |  |       |  |  |  |  |  |       |  |  |  |  |  |       |  |  |  |  |  |       |  |  |  |  |  |       |  |  |  |  |  |       |  |  |  |  |  |       |
|                                                 |  |  |  |  |  |  |  |  |  |  |  |  |  |  | Consensus (14775) T AA T C AGA GT AA GC T A G ACTC G T A C CA AG T GA TCATCA C         |       |  |  |  |  |  |       |  |  |  |  |  |       |  |  |  |  |  |       |  |  |  |  |  |       |  |  |  |  |  |       |  |  |  |  |  |       |  |  |  |  |  |       |  |  |  |  |  |       |
|                                                 |  |  |  |  |  |  |  |  |  |  |  |  |  |  | Section 180                                                                            |       |  |  |  |  |  |       |  |  |  |  |  |       |  |  |  |  |  |       |  |  |  |  |  |       |  |  |  |  |  |       |  |  |  |  |  |       |  |  |  |  |  |       |  |  |  |  |  |       |
|                                                 |  |  |  |  |  |  |  |  |  |  |  |  |  |  | (14858)                                                                                | 14858 |  |  |  |  |  | 14870 |  |  |  |  |  | 14880 |  |  |  |  |  | 14890 |  |  |  |  |  | 14900 |  |  |  |  |  | 14910 |  |  |  |  |  | 14920 |  |  |  |  |  | 14930 |  |  |  |  |  | 14940 |
| K12 Zwischenstück 255.328 - 290.948 (14589)     |  |  |  |  |  |  |  |  |  |  |  |  |  |  | CGTCACTAAATGCT---CAACCCCTGCTGTAAATTCG-TTAAATCCC---GCTGTATGTGCTCAAGCAGTATTTTCACTTCTTTC  |       |  |  |  |  |  |       |  |  |  |  |  |       |  |  |  |  |  |       |  |  |  |  |  |       |  |  |  |  |  |       |  |  |  |  |  |       |  |  |  |  |  |       |  |  |  |  |  |       |
| SARS-CoV-2 Reference Genome NC_045512.2 (11920) |  |  |  |  |  |  |  |  |  |  |  |  |  |  | --TAAATGTGGGCTCAATGTGTCCAGTTACAGCAATGACATTCCTTTAGCTAAAGATACTACTGAGGCCTTTGAAAAAATGGT    |       |  |  |  |  |  |       |  |  |  |  |  |       |  |  |  |  |  |       |  |  |  |  |  |       |  |  |  |  |  |       |  |  |  |  |  |       |  |  |  |  |  |       |  |  |  |  |  |       |
|                                                 |  |  |  |  |  |  |  |  |  |  |  |  |  |  | Consensus (14858) T A T TG CAA T C GT A C T A AT C C GCT A T CT G AG TTT A T           |       |  |  |  |  |  |       |  |  |  |  |  |       |  |  |  |  |  |       |  |  |  |  |  |       |  |  |  |  |  |       |  |  |  |  |  |       |  |  |  |  |  |       |  |  |  |  |  |       |
|                                                 |  |  |  |  |  |  |  |  |  |  |  |  |  |  | Section 181                                                                            |       |  |  |  |  |  |       |  |  |  |  |  |       |  |  |  |  |  |       |  |  |  |  |  |       |  |  |  |  |  |       |  |  |  |  |  |       |  |  |  |  |  |       |  |  |  |  |  |       |
|                                                 |  |  |  |  |  |  |  |  |  |  |  |  |  |  | (14941)                                                                                | 14941 |  |  |  |  |  | 14950 |  |  |  |  |  | 14960 |  |  |  |  |  | 14970 |  |  |  |  |  | 14980 |  |  |  |  |  | 14990 |  |  |  |  |  | 15000 |  |  |  |  |  | 15010 |  |  |  |  |  | 15023 |
| K12 Zwischenstück 255.328 - 290.948 (14665)     |  |  |  |  |  |  |  |  |  |  |  |  |  |  | GTCAGCGTAATTTTCTCGCTACATGCGCTGAATAAGGCTACATCAAGCAAGTTTTTCCAGTTTTCGCGATGGCATGCTGATCGC   |       |  |  |  |  |  |       |  |  |  |  |  |       |  |  |  |  |  |       |  |  |  |  |  |       |  |  |  |  |  |       |  |  |  |  |  |       |  |  |  |  |  |       |  |  |  |  |  |       |
| SARS-CoV-2 Reference Genome NC_045512.2 (12001) |  |  |  |  |  |  |  |  |  |  |  |  |  |  | TTCAC--TACTTTTCT---GTTTTGTCTTCCATGCAGGGTGCTGTAGACA--TAAACAAGCTTTGTGAAGAAATGCTGACAC-    |       |  |  |  |  |  |       |  |  |  |  |  |       |  |  |  |  |  |       |  |  |  |  |  |       |  |  |  |  |  |       |  |  |  |  |  |       |  |  |  |  |  |       |  |  |  |  |  |       |
|                                                 |  |  |  |  |  |  |  |  |  |  |  |  |  |  | Consensus (14941) TCA TA TTTCT GT TGC T A G GT C A CA T C AG TT GA G ATG CTG C         |       |  |  |  |  |  |       |  |  |  |  |  |       |  |  |  |  |  |       |  |  |  |  |  |       |  |  |  |  |  |       |  |  |  |  |  |       |  |  |  |  |  |       |  |  |  |  |  |       |
|                                                 |  |  |  |  |  |  |  |  |  |  |  |  |  |  | Section 182                                                                            |       |  |  |  |  |  |       |  |  |  |  |  |       |  |  |  |  |  |       |  |  |  |  |  |       |  |  |  |  |  |       |  |  |  |  |  |       |  |  |  |  |  |       |  |  |  |  |  |       |
|                                                 |  |  |  |  |  |  |  |  |  |  |  |  |  |  | (15024)                                                                                | 15024 |  |  |  |  |  | 15030 |  |  |  |  |  | 15040 |  |  |  |  |  | 15050 |  |  |  |  |  | 15060 |  |  |  |  |  | 15070 |  |  |  |  |  | 15080 |  |  |  |  |  | 15090 |  |  |  |  |  | 15106 |
| K12 Zwischenstück 255.328 - 290.948 (14748)     |  |  |  |  |  |  |  |  |  |  |  |  |  |  | ACTGGGTGACAGTTTCCAACCTCAGAGGGGCCAACGCAAAAGC--TCCGGTACGACCAGCCGCTTCAAGGCGCGTAACAGATT    |       |  |  |  |  |  |       |  |  |  |  |  |       |  |  |  |  |  |       |  |  |  |  |  |       |  |  |  |  |  |       |  |  |  |  |  |       |  |  |  |  |  |       |  |  |  |  |  |       |
| SARS-CoV-2 Reference Genome NC_045512.2 (12075) |  |  |  |  |  |  |  |  |  |  |  |  |  |  | ACAGGGCAACCTTACAAGCT-ATAGCTCAGAGTTTGTTCCTCCATCATATGACAGCTTTTGTCTACTGCTCAAGA-AGCTT      |       |  |  |  |  |  |       |  |  |  |  |  |       |  |  |  |  |  |       |  |  |  |  |  |       |  |  |  |  |  |       |  |  |  |  |  |       |  |  |  |  |  |       |  |  |  |  |  |       |
|                                                 |  |  |  |  |  |  |  |  |  |  |  |  |  |  | Consensus (15024) AC GGG AC T C A CT A AG C A A C TCC A CAGC T C A GC C A AG TT        |       |  |  |  |  |  |       |  |  |  |  |  |       |  |  |  |  |  |       |  |  |  |  |  |       |  |  |  |  |  |       |  |  |  |  |  |       |  |  |  |  |  |       |  |  |  |  |  |       |

Sars-CoV-2 & E.coli K12 Zwischenstückeapr.apr

|                                                 |         |                                                                                                       |                                                                                       |                                                       |                                 |                                   |                         |                         |         |       |  |
|-------------------------------------------------|---------|-------------------------------------------------------------------------------------------------------|---------------------------------------------------------------------------------------|-------------------------------------------------------|---------------------------------|-----------------------------------|-------------------------|-------------------------|---------|-------|--|
|                                                 |         | Section 183                                                                                           |                                                                                       |                                                       |                                 |                                   |                         |                         |         |       |  |
|                                                 | (15107) | 15107                                                                                                 | 15120                                                                                 | 15130                                                 | 15140                           | 15150                             | 15160                   | 15170                   | 15180   | 15190 |  |
| K12 Zwischenstück 255.328 - 290.948 (14829)     |         | TA GAG GT G - CT TT T T G C T A A                                                                     | G A G C T T C A T T C                                                                 | A T G A A T C C                                       | T T T C A C T A G G G A         | T G A A G T G                     | G T T T A C T G A A T T | T G G C C A C C T       | G A A C |       |  |
| SARS-CoV-2 Reference Genome NC_045512.2 (12156) |         | AT GAG C A G G C T G T T G C T A A                                                                    | T G G - - T G A T T C                                                                 | T G A A G T T G                                       | T T C T T A A A A G T -         | T G A A G A A                     | G T C T T - T G A A T G | T G G C T A A A T - - - | C       |       |  |
| Consensus (15107)                               |         | G A G G C T T T G C T A A                                                                             | G T A T T C                                                                           | A T T T T A                                           | A G T G A A G                   | G T T                             | T G A A T T G G C       | A T C                   |         |       |  |
|                                                 |         | Section 184                                                                                           |                                                                                       |                                                       |                                 |                                   |                         |                         |         |       |  |
|                                                 | (15190) | 15190                                                                                                 | 15200                                                                                 | 15210                                                 | 15220                           | 15230                             | 15240                   | 15250                   | 15260   | 15270 |  |
| K12 Zwischenstück 255.328 - 290.948 (14911)     |         | A G A G G T G A T A T G C T C A C C                                                                   | T C A G A A C A C A C A G G                                                           | T G T C A T A A T G A A A                             | A A A A G A A A T T T           | C A G C G C A G A G T T           | T A A A C G C G A A T   | C C G                   |         |       |  |
| SARS-CoV-2 Reference Genome NC_045512.2 (12232) |         | T G A - - - A T T G - - - A C C                                                                       | G T G A T G C A G C - C A T G                                                         | C A A C G T A A G T T G G                             | A A A A G A - - T G G C         | T G A T C A - A G C T A T G A C C | A A A T G T A           |                         |         |       |  |
| Consensus (15190)                               |         | G A A T T G A C C                                                                                     | G T G A T G C A C C A G                                                               | C T A A                                               | A A A A G A                     | T C G C A A G T                   | A C C A A T             |                         |         |       |  |
|                                                 |         | Section 185                                                                                           |                                                                                       |                                                       |                                 |                                   |                         |                         |         |       |  |
|                                                 | (15273) | 15273                                                                                                 | 15280                                                                                 | 15290                                                 | 15300                           | 15310                             | 15320                   | 15330                   | 15340   | 15350 |  |
| K12 Zwischenstück 255.328 - 290.948 (14994)     |         | C T C A A C T G G T C G T T G A C C A G A A C T A C A                                                 | C C G T G G C A G A T G C A G C C A G C                                               | G C T A T G A T G T C G G C                           | C T T T C C A C A A T G A C G C | G A T G G                         |                         |                         |         |       |  |
| SARS-CoV-2 Reference Genome NC_045512.2 (12304) |         | - T A A A C A G G C - - T A G A T C T G A G G - A C A                                                 | A G A G G G C A A A G T T A C T A G T G C T A T G C A                                 | G A C A A T G C T T T T C A C A T G C T T A           | G A A A G                       |                                   |                         |                         |         |       |  |
| Consensus (15273)                               |         | T A A C G G T G A C G A                                                                               | A C A G G C A A G C A G                                                               | G C T A T G A                                         | C T T T C A C A T G             | G A                               |                         |                         |         |       |  |
|                                                 |         | Section 186                                                                                           |                                                                                       |                                                       |                                 |                                   |                         |                         |         |       |  |
|                                                 | (15356) | 15356                                                                                                 | 15370                                                                                 | 15380                                                 | 15390                           | 15400                             | 15410                   | 15420                   | 15430   | 15440 |  |
| K12 Zwischenstück 255.328 - 290.948 (15077)     |         | G T G A A A C A A T T A C G T G A T G A A C G G C A G G G - C A A A A C A C                           | C A A A A G C C T C C C C C A                                                         | T T A C C C C G G A A C A A T T                       | G A A A T C C G T G A G C       |                                   |                         |                         |         |       |  |
| SARS-CoV-2 Reference Genome NC_045512.2 (12383) |         | T T G G A T - A A T G A T G C A C T C A A C A A C A T T A T                                           | C A A C A A T G C A A G A G A T G G T T G T G T T - C C C T T                         | G A A C A T A T - - - A C C T C T T A C A             |                                 |                                   |                         |                         |         |       |  |
| Consensus (15356)                               |         | T G A A A T A G T A A C A C A A A G                                                                   | T T C C C G A A C A A T                                                               | A C T A                                               |                                 |                                   |                         |                         |         |       |  |
|                                                 |         | Section 187                                                                                           |                                                                                       |                                                       |                                 |                                   |                         |                         |         |       |  |
|                                                 | (15439) | 15439                                                                                                 | 15450                                                                                 | 15460                                                 | 15470                           | 15480                             | 15490                   | 15500                   | 15510   | 15520 |  |
| K12 Zwischenstück 255.328 - 290.948 (15159)     |         | T C A G G A A A - A A G C T A C A A C G T A T T G A A A T G                                           | A A A A T G A A A T A T T A A A A A A G G C T A C                                     | T G T A G A T T C A A - - T T G G T C A A C G C A A C |                                 |                                   |                         |                         |         |       |  |
| SARS-CoV-2 Reference Genome NC_045512.2 (12461) |         | A C A G C A G C C A A A C T A A T G G T T G T C A T A C C A G A C T A T A C A C A T A T               | A A A A A T A C G T G T G A T G G T A C A A C A T T T A C T T A T G C A T C           |                                                       |                                 |                                   |                         |                         |         |       |  |
| Consensus (15439)                               |         | C A G A A A C T A T T A                                                                               | G A A T A A A A A C                                                                   | T G G T G T C A A T T                                 | A G C A                         |                                   |                         |                         |         |       |  |
|                                                 |         | Section 188                                                                                           |                                                                                       |                                                       |                                 |                                   |                         |                         |         |       |  |
|                                                 | (15522) | 15522                                                                                                 | 15530                                                                                 | 15540                                                 | 15550                           | 15560                             | 15570                   | 15580                   | 15590   | 15600 |  |
| K12 Zwischenstück 255.328 - 290.948 (15239)     |         | A G - - T T A T G T G A A A A C - A T G G G G T T G C G A G G T T T T T T G                           | - - A A T G A G A C G A A C - - A T T A C A G C A G A - - G G A A A A G C C T C T G   |                                                       |                                 |                                   |                         |                         |         |       |  |
| SARS-CoV-2 Reference Genome NC_045512.2 (12544) |         | A G C A T T G T G G A A A T C A A C A G G T T G T A G A T G C A G A T A G T A A A T T G T T C A A C   | T T A G T G A A A T T A G T A T G G A C A A T T C A C C T A                           |                                                       |                                 |                                   |                         |                         |         |       |  |
| Consensus (15522)                               |         | A G T T T G G A A A C A G G T T G                                                                     | G A G T G A A                                                                         | A A C A T A A A G G G A A A C                         | A T A A A G G G A A C C T       |                                   |                         |                         |         |       |  |
|                                                 |         | Section 189                                                                                           |                                                                                       |                                                       |                                 |                                   |                         |                         |         |       |  |
|                                                 | (15605) | 15605                                                                                                 | 15610                                                                                 | 15620                                                 | 15630                           | 15640                             | 15650                   | 15660                   | 15670   | 15680 |  |
| K12 Zwischenstück 255.328 - 290.948 (15313)     |         | T T T T T G A C T A T G G A A G A A C G G A A C A G G C T T C A G T G A A A                           | T A G C G A A T A T C C T G G G T C A A A A C C C G G A A C G A T C T T C A C T A T G |                                                       |                                 |                                   |                         |                         |         |       |  |
| SARS-CoV-2 Reference Genome NC_045512.2 (12627) |         | A T T T A G C A T G G C C T C T A T T G T A A C A G C T T T A G G G C C A - - - - - A T T C T G C T G | T C A A A T T A C G A A T A T G A G C - - - - -                                       |                                                       |                                 |                                   |                         |                         |         |       |  |
| Consensus (15605)                               |         | T T T G A                                                                                             | A G A A C A G T T A G G A                                                             | A T C T G T C A A A C G A A T A T C                   |                                 |                                   |                         |                         |         |       |  |

Sars-CoV-2 & E.coli K12 Zwischenstückapr.apr

|                                                 |           |       |       |       |       |       |       |       |       |       |       |     |      |     |    |      |     |     |     |      |     |      |      |     |     |      |     |      |      |       |     |     |     |     |     |     |     |     |     |     |    |    |    |    |   |
|-------------------------------------------------|-----------|-------|-------|-------|-------|-------|-------|-------|-------|-------|-------|-----|------|-----|----|------|-----|-----|-----|------|-----|------|------|-----|-----|------|-----|------|------|-------|-----|-----|-----|-----|-----|-----|-----|-----|-----|-----|----|----|----|----|---|
| Section 190                                     |           |       |       |       |       |       |       |       |       |       |       |     |      |     |    |      |     |     |     |      |     |      |      |     |     |      |     |      |      |       |     |     |     |     |     |     |     |     |     |     |    |    |    |    |   |
| (15688)                                         | 15688     | 15700 | 15710 | 15720 | 15730 | 15740 | 15750 | 15760 | 15770 |       |       |     |      |     |    |      |     |     |     |      |     |      |      |     |     |      |     |      |      |       |     |     |     |     |     |     |     |     |     |     |    |    |    |    |   |
| K12 Zwischenstück 255.328 - 290.948 (15396)     | TTAAGGGAT | TACTG | GC    | GGCA  | TAAAC | CCC   | ATG   | AG    | CGTAA | GGG   | CTGTA | GCT | CAC  | CTG | AC | ACTG | TG  | AG  | CGC | GAG  | GAG | AT   | AC   | G   |     |      |     |      |      |       |     |     |     |     |     |     |     |     |     |     |    |    |    |    |   |
| SARS-CoV-2 Reference Genome NC_045512.2 (12696) | TTAG----  | TCTG  | TT    | GCAC  | TACG  | ACAG  | ATG   | T     | CTTGT | GCTGC | CGGTA | CTA | CAC  | --- | AA | ACTG | CT  | TG  | CA  | CT   | GAT | GAC  | A    | TG  |     |      |     |      |      |       |     |     |     |     |     |     |     |     |     |     |    |    |    |    |   |
| Consensus (15688)                               | TTA       | T     | CTG   | G     | TA    | AC    | ATG   | C     | T     | GC    | G     | C   | GTA  | CAC | A  | ACTG | TG  | C   | GA  | GA   | A   | A    | G    |     |     |      |     |      |      |       |     |     |     |     |     |     |     |     |     |     |    |    |    |    |   |
| Section 191                                     |           |       |       |       |       |       |       |       |       |       |       |     |      |     |    |      |     |     |     |      |     |      |      |     |     |      |     |      |      |       |     |     |     |     |     |     |     |     |     |     |    |    |    |    |   |
| (15771)                                         | 15771     | 15780 | 15790 | 15800 | 15810 | 15820 | 15830 | 15840 | 15853 |       |       |     |      |     |    |      |     |     |     |      |     |      |      |     |     |      |     |      |      |       |     |     |     |     |     |     |     |     |     |     |    |    |    |    |   |
| K12 Zwischenstück 255.328 - 290.948 (15479)     | AGCTG     | GT    | TT    | GTC   | AG    | CAAA  | TGA   | GCA   | TT    | CTG   | CG    | CT  | GA   | ATC | G  | CAG  | TCC | TT  | CGA | CGAT | C   | T    | AC   | GT  | GA  | AG   | T   | TC   |      |       |     |     |     |     |     |     |     |     |     |     |    |    |    |    |   |
| SARS-CoV-2 Reference Genome NC_045512.2 (12768) | CGTTAG    | CTT   | ACT   | A     | ---   | CAA   | CA    | CA    | AA    | ---   | GGG   | AG  | G    | TAG | T  | TG   | CT  | --- | GCA | TG   | TT  | ATC  | CGAT | T   | AC  | AG   | GA  | TTT  | ---  |       |     |     |     |     |     |     |     |     |     |     |    |    |    |    |   |
| Consensus (15771)                               | G         | T     | G     | TT    | A     | CAA   | A     | A     | A     | G     | G     | G   | TAG  | T   | TG | CT   |     |     | GCA | T    | TT  | CGAT | T    | AC  | GA  | T    |     |      |      |       |     |     |     |     |     |     |     |     |     |     |    |    |    |    |   |
| Section 192                                     |           |       |       |       |       |       |       |       |       |       |       |     |      |     |    |      |     |     |     |      |     |      |      |     |     |      |     |      |      |       |     |     |     |     |     |     |     |     |     |     |    |    |    |    |   |
| (15854)                                         | 15854     | 15860 | 15870 | 15880 | 15890 | 15900 | 15910 | 15920 | 15936 |       |       |     |      |     |    |      |     |     |     |      |     |      |      |     |     |      |     |      |      |       |     |     |     |     |     |     |     |     |     |     |    |    |    |    |   |
| K12 Zwischenstück 255.328 - 290.948 (15562)     | AGC       | GT    | AAT   | GGG   | GC    | AGA   | CG    | TA    | TT    | CA    | AA    | CT  | GT   | TT  | GA | TG   | CT  | AA  | TA  | AC   | CG  | AG   | CCA  | AC  | AG  | AA   | TG  | CG   | AAA  | AA    | GG  | CC  | AAA | AC  | CG  | T   | GC  |     |     |     |    |    |    |    |   |
| SARS-CoV-2 Reference Genome NC_045512.2 (12838) | ---       | G     | AAT   | GGG   | CT    | AGA   | TT    | C     | CT    | AA    | GA    | GT  | GA   | AC  | TG | TG   | TA  | TA  | C   |      |     |      | AC   | AG  | AA  | G    | GAA | C    | A    | T     |     |     |     |     |     |     |     |     |     |     |    |    |    |    |   |
| Consensus (15854)                               |           | G     | AAT   | GGG   |       | AGA   | C     | T     | A     | A     | G     | TG  |      |     | TG | TA   | TA  | C   |     |      |     | AC   | AG   | AA  | G   | GAA  | C   | A    | T    |       |     |     |     |     |     |     |     |     |     |     |    |    |    |    |   |
| Section 193                                     |           |       |       |       |       |       |       |       |       |       |       |     |      |     |    |      |     |     |     |      |     |      |      |     |     |      |     |      |      |       |     |     |     |     |     |     |     |     |     |     |    |    |    |    |   |
| (15937)                                         | 15937     | 15950 | 15960 | 15970 | 15980 | 15990 | 16000 | 16019 |       |       |       |     |      |     |    |      |     |     |     |      |     |      |      |     |     |      |     |      |      |       |     |     |     |     |     |     |     |     |     |     |    |    |    |    |   |
| K12 Zwischenstück 255.328 - 290.948 (15645)     | TTAC      | TG    | ---   | GAT   | CA    | AAA   | TT    | TAC   | ATT   | GC    | GAA   | AGC | TT   | GT  | T  | CT   | GGA | AA  | AG  | CT   | GGA | GAT  | GA   | AA  | TGG | TCT  | CC  | AG   | AG   | CA    | AA  | TAT | --- | CAG |     |     |     |     |     |     |    |    |    |    |   |
| SARS-CoV-2 Reference Genome NC_045512.2 (12912) | TTAC      | AG    | A     | C     | AC    | ACC   | T     | AAA   | GG    | T     | C     | T   | AA   | AG  | T  | GAA  | GTA | TT  | TAT | ACT  | TTT | A    | TT   | AAA | GGA | TT   | AA  | CA   | ACC  | T     | AA  | T   | AG  | AG  | GT  | AT  | GG  | T   | ACT | TT  |    |    |    |    |   |
| Consensus (15937)                               | TTAC      | G     |       | A     | C     | AAA   | T     | C     | A     | G     | GAA   | TT  | T    |     | A  |      | GGA | A   | A   | T    | AG  | AG   | A    | T   | C   |      |     |      |      |       |     |     |     |     |     |     |     |     |     |     |    |    |    |    |   |
| Section 194                                     |           |       |       |       |       |       |       |       |       |       |       |     |      |     |    |      |     |     |     |      |     |      |      |     |     |      |     |      |      |       |     |     |     |     |     |     |     |     |     |     |    |    |    |    |   |
| (16020)                                         | 16020     | 16030 | 16040 | 16050 | 16060 | 16070 | 16080 | 16090 | 16102 |       |       |     |      |     |    |      |     |     |     |      |     |      |      |     |     |      |     |      |      |       |     |     |     |     |     |     |     |     |     |     |    |    |    |    |   |
| K12 Zwischenstück 255.328 - 290.948 (15724)     | GAT       | GT    | T     | AA    | AG    | GC    | GAA   | CA    | AA    | CC    | AC    | GC  | T    | CA  | AA | AA   | AC  | GCT | GC  | AA   | T   | AT   | C    | AC  | CT  | G    | AG  | ACA  | AA   | TT    | TAT | AAA | AC  | G   | CT  | GTA | CT  | TC  | G   | TAG | C  |    |    |    |   |
| SARS-CoV-2 Reference Genome NC_045512.2 (12995) | GG        | T     | AG    | TT    | AG    | CT    | G     | ---   | CC    | AC    | AG    | T   | AC   | GC  | T  | CA   | AA  | --- | GCT | GC   | T   | AA   | T    | GCA | AC  | AGA  | AG  | TGCC | TGCC | AA    | TT  | CA  | AC  | TG  | TAT | TAT | CT  | TT  | --- | C   |    |    |    |    |   |
| Consensus (16020)                               | G         | T     | GTT   | AG    | G     | C     | A     | A     | AC    | GTC   | A     | AA  | GCTG | AA  | T  | AC   | AG  |     |     |      |     |      | AG   |     |     | T    | A   |      |      | CTGTA | T   | TC  | T   | C   |     |     |     |     |     |     |    |    |    |    |   |
| Section 195                                     |           |       |       |       |       |       |       |       |       |       |       |     |      |     |    |      |     |     |     |      |     |      |      |     |     |      |     |      |      |       |     |     |     |     |     |     |     |     |     |     |    |    |    |    |   |
| (16103)                                         | 16103     | 16110 | 16120 | 16130 | 16140 | 16150 | 16160 | 16170 | 16185 |       |       |     |      |     |    |      |     |     |     |      |     |      |      |     |     |      |     |      |      |       |     |     |     |     |     |     |     |     |     |     |    |    |    |    |   |
| K12 Zwischenstück 255.328 - 290.948 (15807)     | C         | GTG   | AAG   | CGC   | T     | A     | C     | CA    | CC    | TG    | AA    | TAT | T    | A   | C  | AG   | C   | AT  | CT  | G    | G   | AC   | GG   | T   | CG  | CA   | TAG | C    | T    | C     | G   | CC  | AT  | TGG | CAG | G   | CGT | CAT | AC  | CC  | GC | AA | AG | G  |   |
| SARS-CoV-2 Reference Genome NC_045512.2 (13073) | T         | GTG   | C     | TTT   | ---   | T     | G     | T     | GT    | A     | GA    | TG  | CT   | GC  | T  | A    | AG  | C   | T   | A    | --- | CA   | A    | GA  | T   | TAT  | C   | TAG  | C    | ---   | TAG | --- | TGG | GG  | G   | CA  | AA  | C   | CA  | T   | CA | CT | AA | TT | G |
| Consensus (16103)                               |           | GTG   |       |       |       | T     | C     | A     | TG    |       | TA    | AGC | T    |     | C  | A    | G   | T   |     |      |     |      |      |     |     | TAGC |     | T    | G    |       | TGG | G   | C   | C   | A   | C   |     |     |     |     |    |    |    |    |   |
| Section 196                                     |           |       |       |       |       |       |       |       |       |       |       |     |      |     |    |      |     |     |     |      |     |      |      |     |     |      |     |      |      |       |     |     |     |     |     |     |     |     |     |     |    |    |    |    |   |
| (16186)                                         | 16186     | 16200 | 16210 | 16220 | 16230 | 16240 | 16250 | 16268 |       |       |       |     |      |     |    |      |     |     |     |      |     |      |      |     |     |      |     |      |      |       |     |     |     |     |     |     |     |     |     |     |    |    |    |    |   |
| K12 Zwischenstück 255.328 - 290.948 (15890)     | C         | GA    | ---   | AAGA  | G     | GT    | AC    | GA    | T     | T     | ACA   | T   | AG   | TG  | A  | ---  | AC  | GG  | AA  | CA   | CCA | AT   | T    | AC  | GA  | AC   | GT  | T    | CC   | GAA   | --- | AT  | AT  | CG  | AT  | --- | AA  | C   | AGA | CG  | C  | T  | CT |    |   |
| SARS-CoV-2 Reference Genome NC_045512.2 (13147) | T         | G     | TT    | AAGA  | T     | GT    | TG    | TG    | T     | AC    | ACA   | C   | AC   | TG  | GT | AC   | TG  | GT  | CA  | GGC  | AA  | T    | AC   | AG  | TT  | TACA | CC  | G    | AA   | G     | CCA | AT  | AT  | TG  | GAT | C   | AA  | G   | AAT | C   | CT | T  | TG |    |   |
| Consensus (16186)                               |           | G     |       | AAGA  | GT    |       | T     | ACA   | A     | TG    | AC    | G   | CA   |     | A  | T    | AC  |     |     |      |     |      |      |     |     |      | CC  | GAA  |      | ATAT  | GAT | AA  | A   | C   | T   |     |     |     |     |     |    |    |    |    |   |

Sars-CoV-2 & E.coli K12 Zwischenstück.epr.apr

|                                                 |        |       |       |       |        |       |       |       |       |             |       |        |          |          |        |       |        |         |       |         |        |        |        |           |        |     |
|-------------------------------------------------|--------|-------|-------|-------|--------|-------|-------|-------|-------|-------------|-------|--------|----------|----------|--------|-------|--------|---------|-------|---------|--------|--------|--------|-----------|--------|-----|
|                                                 |        |       |       |       |        |       |       |       |       | Section 197 |       |        |          |          |        |       |        |         |       |         |        |        |        |           |        |     |
| (16269)                                         | 16269  | 16280 | 16290 | 16300 | 16310  | 16320 | 16330 | 16340 | 16351 |             |       |        |          |          |        |       |        |         |       |         |        |        |        |           |        |     |
| K12 Zwischenstück 255.328 - 290.948 (15966)     | C      | TGGG  | GCAT  | TGGG  | GAG    | GG    | GCAT  | TTTAG | GTCT  | CAAG        | GTACA | AAAA   | AC       | TCT      | CAT    | TAT   | AGCC   | AC--    | ACT   | TT      | GTA    | GAC    | CG     | AAAA      | TCACGT | TAT |
| SARS-CoV-2 Reference Genome NC_045512.2 (13230) | G      | TGGT  | GCAT  | CGT   | GTT    | GT    | CTG   | TACT  | GC    | GTT         | GCC   | ACAT   | AGAT     | CATC     | CA     | AAT   | CCTA   | AAGG    | ATT   | TT      | TGT    | GAC    | TT     | AAAA      | GGTAAG | TAT |
| Consensus (16269)                               |        | TGG   | GCAT  | G     | G      | G     | C     | T     | G     | C           | G     | ACA    | A        | A        | C      | CA    | AT     | A       | A     | TT      | GAC    | AAAA   |        |           | TAT    |     |
|                                                 |        |       |       |       |        |       |       |       |       | Section 198 |       |        |          |          |        |       |        |         |       |         |        |        |        |           |        |     |
| (16352)                                         | 16352  | 16360 | 16370 | 16380 | 16390  | 16400 | 16410 | 16420 | 16434 |             |       |        |          |          |        |       |        |         |       |         |        |        |        |           |        |     |
| K12 Zwischenstück 255.328 - 290.948 (16047)     | ACGATC | ATCGT | TAGA  | ACTCA | GGG    | GC    | AAAG  | ATT   | CTGT  | CTCAG       | TAA   | ATCAGG | GT       | CTTA     | CCG    | ACAA  | AT     | TC      | CTGAG | TT      | TACCGT | CAGA   |        |           |        |     |
| SARS-CoV-2 Reference Genome NC_045512.2 (13313) | GTACAA | ATACC | TACA  | AACTT | GTG    | CT    | AA    | TGA   | CC    | CTGT        | GGGTT | T      | A        | -----    | C      | ACTTA | AAA    | ACA     | CAG   | TC      | -----  | TG     | TACCGT | CTG       | C      |     |
| Consensus (16352)                               |        | AT    | TA    | A     | G      | G     | AA    | GA    | CTGT  |             | T     | A      |          |          | C      | CTTA  | ACA    | A       | TC    |         | T      | TACCGT | C      | G         |        |     |
|                                                 |        |       |       |       |        |       |       |       |       | Section 199 |       |        |          |          |        |       |        |         |       |         |        |        |        |           |        |     |
| (16435)                                         | 16435  | 16440 | 16450 | 16460 | 16470  | 16480 | 16490 | 16500 | 16517 |             |       |        |          |          |        |       |        |         |       |         |        |        |        |           |        |     |
| K12 Zwischenstück 255.328 - 290.948 (16130)     | AC     | TCA   | GAAAA | ATC   | ACT    | GAC   | ATGG  | GAC   | GAG   | GAATG       | GAAC  | TGGC   | CAG      | ACAT     | CT     | TAGA  | AAT    | TT      | ACT   | GTCAGC  | ACCG   | GC     | GTT    | AAA       | GTTT   |     |
| SARS-CoV-2 Reference Genome NC_045512.2 (13385) | GG     | TAT   | GTGA  | --AAG | GTT    | ATGG  | --CTG | TAG   | TTGT  | GAT         | CAACT | CCG    | CGA      | AAC      | CCATGC | TT    | C      | AGTCAGC | TGAT  | GC      | ACA    | A      | ATC    | GTTT      |        |     |
| Consensus (16435)                               |        | T     | G     | A     | A      | G     | ATGG  | C     | G     | G           | GA    | C      | C        | G        | A      | C     |        | TT      | C     | GTCAGC  | GC     | A      | GTTT   |           |        |     |
|                                                 |        |       |       |       |        |       |       |       |       | Section 200 |       |        |          |          |        |       |        |         |       |         |        |        |        |           |        |     |
| (16518)                                         | 16518  | 16530 | 16540 | 16550 | 16560  | 16570 | 16580 | 16590 | 16600 |             |       |        |          |          |        |       |        |         |       |         |        |        |        |           |        |     |
| K12 Zwischenstück 255.328 - 290.948 (16213)     | ACTTCT | GC    | GAT   | CC    | TCA    | GAG   | CT    | TGG   | CAGC  | GG          | GAAC  | AA     | TGAGAATA | CAA      | AT     | G     | GG     | CTA     | AT    | CGGCAGT | ACT    | TT     | T      | CCTAAAAAG |        |     |
| SARS-CoV-2 Reference Genome NC_045512.2 (13463) | TTAAAC | GG    | GT    | TTG   | -GG    | TGT   | AAG   | TG    | -CAGC | CC          | G     | TCTT   | ACA      | CCGTGCGG | CA     | CAG   | CA     | CTA     | G     | TAC     | TAT    | GT     | CG     | TAT       | -----  |     |
| Consensus (16518)                               |        | G     | G     | T     | C      | G     | GT    | TG    | CAGC  | G           | A     | A      |          | CA       | A      | G     | CTA    | T       | C     | G       | GT     | T      | T      |           |        |     |
|                                                 |        |       |       |       |        |       |       |       |       | Section 201 |       |        |          |          |        |       |        |         |       |         |        |        |        |           |        |     |
| (16601)                                         | 16601  | 16610 | 16620 | 16630 | 16640  | 16650 | 16660 | 16670 | 16683 |             |       |        |          |          |        |       |        |         |       |         |        |        |        |           |        |     |
| K12 Zwischenstück 255.328 - 290.948 (16296)     | ACA    | TGT   | CTT   | GCCCA | ATA    | TAG   | TC    | AAC   | ATGAA | CTAG        | AT    | CTGG   | TTGCT    | GCTCAG   | CTAAA  | C     | AAC    | AG      | ACC   | GAGAAA  | GACA   | CTG    | AAG    | TT        |        |     |
| SARS-CoV-2 Reference Genome NC_045512.2 (13535) | ACA    | G     | G     | CTT   | TTGAC  | AT    | C     | TAG   | A     | ATG         | ATA   | AG     | TAG      | CT       | GGTT   | TTGCT | AAATTC | CTAAA   | -AAC  | TA      | ATT    | GTTGTC | GCTT   | C         | -AAG-- |     |
| Consensus (16601)                               |        | ACA   | G     | CTT   |        | AT    | TAC   | A     | AT    | AA          | TAG   | T      | TTGCT    |          | CTAAA  | AAC   | A      | G       |       | G       | C      | AAG    |        |           |        |     |
|                                                 |        |       |       |       |        |       |       |       |       | Section 202 |       |        |          |          |        |       |        |         |       |         |        |        |        |           |        |     |
| (16684)                                         | 16684  | 16690 | 16700 | 16710 | 16720  | 16730 | 16740 | 16750 | 16766 |             |       |        |          |          |        |       |        |         |       |         |        |        |        |           |        |     |
| K12 Zwischenstück 255.328 - 290.948 (16379)     | C      | AAAA  | CAC   | CGAA  | AGA    | GAT   | AATT  | GAA   | AGGG  | GGT         | GT    | TG     | CATTG    | ACAG     | ATT    | TGA   | TCT    | ACA     | AC    | CGCG    | CTCT   | TGAT   | TGT    | CAGACT    | CCCTG  |     |
| SARS-CoV-2 Reference Genome NC_045512.2 (13613) | -      | AAAA  | GGA   | CGAA  | GAT    | GAC   | AATT  | TAA   | TTGAT | TCT         | TACT  | TTG    | T--      | AG       | TTAA   | GAG   | ACA    | CA      | CTTT  | CTCT    | AACT   | TAC    | CA     | ACAT      | GAAGA  |     |
| Consensus (16684)                               |        | AAAA  | CGAA  | GA    | AATT   | AA    | G     | T     | TT    | C           | TTG   |        | A        | T        | AA     | ACA   | C      | CTCT    | T     | CA      | T      |        |        |           |        |     |
|                                                 |        |       |       |       |        |       |       |       |       | Section 203 |       |        |          |          |        |       |        |         |       |         |        |        |        |           |        |     |
| (16767)                                         | 16767  | 16780 | 16790 | 16800 | 16810  | 16820 | 16830 | 16849 |       |             |       |        |          |          |        |       |        |         |       |         |        |        |        |           |        |     |
| K12 Zwischenstück 255.328 - 290.948 (16462)     | AACAG  | TT    | CTCG  | ATAAT | CGGGAA | ACT   | CAG   | GG    | CGC   | GT          | TATC  | CTGT   | G        | GC       | ACT    | C     | TCTGCC | ATGTG   | TTC   | GGGG    | TT     | CA     | TCGC   | AG        | AGC    |     |
| SARS-CoV-2 Reference Genome NC_045512.2 (13692) | AACA   | A     | TT    | T---  | ATAAT  | TT--- | ACT   | TA    | AGG   | ATT         | GT    | CCAG   | CTGT     | T        | GC     | TAA   | C      | -----   | ATGAC | TTCT    | ---    | TT     | AA     | GTTT      | AG     | ATA |
| Consensus (16767)                               |        | AACA  | TT    |       | ATAAT  |       | ACT   | A     | GG    | GT          |       | CTGT   | GC       | A        | C      |       |        | ATG     | TTC   | TT      | A      | AG     | A      |           |        |     |

Sars-CoV-2 & E.coli K12 Zwischenstücke apr.apr

Figure 1: SARS-CoV-2 genome sequence alignment and consensus. The figure displays the SARS-CoV-2 genome sequence alignment and consensus across 10 sections (204 to 210). The alignment is shown for the K12 Zwischenstück 255.328 - 290.948 (16545) and the SARS-CoV-2 Reference Genome NC 045512.2 (13759). The consensus sequence is provided for each section. The alignment is color-coded: yellow for matches, green for mismatches, and red for gaps. The consensus sequence is shown in black text.

**Section 204**

K12 Zwischenstück 255.328 - 290.948 (16545)  
SARS-CoV-2 Reference Genome NC 045512.2 (13759)  
Consensus (16850)

**Section 205**

K12 Zwischenstück 255.328 - 290.948 (16628)  
SARS-CoV-2 Reference Genome NC 045512.2 (13833)  
Consensus (16933)

**Section 206**

K12 Zwischenstück 255.328 - 290.948 (16711)  
SARS-CoV-2 Reference Genome NC 045512.2 (13907)  
Consensus (17016)

**Section 207**

K12 Zwischenstück 255.328 - 290.948 (16791)  
SARS-CoV-2 Reference Genome NC 045512.2 (13985)  
Consensus (17099)

**Section 208**

K12 Zwischenstück 255.328 - 290.948 (16868)  
SARS-CoV-2 Reference Genome NC 045512.2 (14066)  
Consensus (17182)

**Section 209**

K12 Zwischenstück 255.328 - 290.948 (16946)  
SARS-CoV-2 Reference Genome NC 045512.2 (14141)  
Consensus (17265)

**Section 210**

K12 Zwischenstück 255.328 - 290.948 (17028)  
SARS-CoV-2 Reference Genome NC 045512.2 (14220)  
Consensus (17348)

Sars-CoV-2 & E.coli K12 Zwischenstückaprr.apr

|                                         |         |          |         |          |         |          |        |        |         |          |         |          |             |         |          |         |       |         |        |      |     |     |     |     |    |   |     |
|-----------------------------------------|---------|----------|---------|----------|---------|----------|--------|--------|---------|----------|---------|----------|-------------|---------|----------|---------|-------|---------|--------|------|-----|-----|-----|-----|----|---|-----|
|                                         |         |          |         |          |         |          |        |        |         |          |         |          | Section 211 |         |          |         |       |         |        |      |     |     |     |     |    |   |     |
|                                         | (17431) | 17431    | 17440   | 17450    | 17460   | 17470    | 17480  | 17490  | 17500   | 17513    |         |          |             |         |          |         |       |         |        |      |     |     |     |     |    |   |     |
| K12 Zwischenstück 255.328 - 290.948     | (17111) | CCGTTAAT | TCCGCC  | TCTGTGGG | TGAAAC  | CGTCA    | CCAC   | AGGCC  | TACGTG  | ATCTGACA | GGCCGTG | CAGGAGGA | AACTG       | GCAGTG  | ---      |         |       |         |        |      |     |     |     |     |    |   |     |
| SARS-CoV-2 Reference Genome NC 045512.2 | (14293) | C-GTTA   | T-TTAAA | TATG     | GGATCAG | ACA      | TACC   | -CAAAT | TGTGT   | TAAC     | CTGTTT  | GGATGA   | -CAGATG     | CA      | TTCTGC   |         |       |         |        |      |     |     |     |     |    |   |     |
| Consensus                               | (17431) | C        | GTTA    | T        | T       | GG       | T      | A      | A       | CACC     | C       | T        | GT          | A       | CTG      | GG      | G     | CAG     | G      | A    | GCA | TG  |     |     |    |   |     |
|                                         |         |          |         |          |         |          |        |        |         |          |         |          | Section 212 |         |          |         |       |         |        |      |     |     |     |     |    |   |     |
|                                         | (17514) | 17514    | 17520   | 17530    | 17540   | 17550    | 17560  | 17570  | 17580   | 17596    |         |          |             |         |          |         |       |         |        |      |     |     |     |     |    |   |     |
| K12 Zwischenstück 255.328 - 290.948     | (17191) | ATACGT   | -AAGCAC | TGCCGG   | TCGAAG  | GTGTT    | TTGAC  | ATGTAA | --TGC   | GAAACAC  | CGGGC   | AGCAGCG  | TCTAT       | CAC     | GCTTGC   | GTT     |       |         |        |      |     |     |     |     |    |   |     |
| SARS-CoV-2 Reference Genome NC 045512.2 | (14373) | AAACTT   | TAA     | TGTT     | TATTC   | CTACA    | GTGTT  | CCCAC  | CTACA   | AGTTT    | TGGAC   | CAC      | TAGTG       | -AGAAAA | TATTT    | TGTTGAT | GGT   | GTT     |        |      |     |     |     |     |    |   |     |
| Consensus                               | (17514) | A        | AC      | T        | AA      | T        | TC     | A      | GTGTT   | AC       | T       | A        | T           | G       | A        | CAC     | G     | G       | AG     | A    | T   | T   | T   | G   | T  | G | GTT |
|                                         |         |          |         |          |         |          |        |        |         |          |         |          | Section 213 |         |          |         |       |         |        |      |     |     |     |     |    |   |     |
|                                         | (17597) | 17597    | 17610   | 17620    | 17630   | 17640    | 17650  | 17660  | 17679   |          |         |          |             |         |          |         |       |         |        |      |     |     |     |     |    |   |     |
| K12 Zwischenstück 255.328 - 290.948     | (17270) | GC-TGAC  | TTC     | TGC      | CAACT   | TGC      | GGCAAG | CAAGGA | TAAAGAG | TGCG     | ACGG    | GCAG     | --CCT       | CCTCAG  | TATGC    | CTGAGT  | TC    | AGGCAGG |        |      |     |     |     |     |    |   |     |
| SARS-CoV-2 Reference Genome NC 045512.2 | (14455) | CCATTTG  | TAG     | TTT      | CAACT   | ---      | GGATAC | CA     | ---     | TTCAGAG  | AGC     | TAGGT    | GTTGT       | ATAT    | TCAG     | GATG    | TAACT | TACA    | TAGCTC |      |     |     |     |     |    |   |     |
| Consensus                               | (17597) | C        | T       | T        | T       | CAACT    | GG     | A      | CA      | T        | AGAG    | GC       | A           | G       | G        | G       | C     | T       | TCAG   | ATG  | T   | CA  |     |     |    |   |     |
|                                         |         |          |         |          |         |          |        |        |         |          |         |          | Section 214 |         |          |         |       |         |        |      |     |     |     |     |    |   |     |
|                                         | (17680) | 17680    | 17690   | 17700    | 17710   | 17720    | 17730  | 17740  | 17750   | 17762    |         |          |             |         |          |         |       |         |        |      |     |     |     |     |    |   |     |
| K12 Zwischenstück 255.328 - 290.948     | (17350) | TAAAC    | CGGGGA  | AGGT     | CAGCG   | ACGGA    | TGTTA  | AGGG   | GGCAT   | GGCT     | CCGA    | TGAC     | GC          | GC      | TG       | GCTGG   | CGGA  | GCTTC   | CG     | GTA  | GTA | TCG |     |     |    |   |     |
| SARS-CoV-2 Reference Genome NC 045512.2 | (14532) | TAGAC    | TT---   | AGTT     | TT---   | AAGGA    | -TTA   | CTTGT  | GTATG   | CTG      | CTGA    | CCCT     | GC          | TA      | TG       | CA---   | CGCT  | GCTTC   | G      | ---  | GTA | TC  |     |     |    |   |     |
| Consensus                               | (17680) | TA       | AC      |          | AG      | T        | A      | GGA    | TTA     | G        | G       | ATG      | C           | GA      |          | GC      | TG    | CG      | GCTTC  | G    | GTA | TC  |     |     |    |   |     |
|                                         |         |          |         |          |         |          |        |        |         |          |         |          | Section 215 |         |          |         |       |         |        |      |     |     |     |     |    |   |     |
|                                         | (17763) | 17763    | 17770   | 17780    | 17790   | 17800    | 17810  | 17820  | 17830   | 17845    |         |          |             |         |          |         |       |         |        |      |     |     |     |     |    |   |     |
| K12 Zwischenstück 255.328 - 290.948     | (17433) | CGATGG   | GGAAG   | CCAT     | TACATG  | GCGAAGG  | GAAGC  | AGTT   | TGAATG  | TGTTG    | CGAC    | GTGAA    | TTAA        | CTGAC   | CTAACGAG | GTGAAG  |       |         |        |      |     |     |     |     |    |   |     |
| SARS-CoV-2 Reference Genome NC 045512.2 | (14602) | TTACTAG  | GATAA   | AGCAC    | TAGTG   | CTTTTCAG | TAGC   | ---    | TGCACT  | TACTAA   | CAATGT  | TGCTTT   | TTTCAA      | ACT---  | GTCAA    |         |       |         |        |      |     |     |     |     |    |   |     |
| Consensus                               | (17763) | A        | G       | AA       | C       | CA       | TAC    | TG     |         | G        | AGC     | TG       | A           | T       | T        | C       | A     | GT      | TT     | C    | AC  |     | GT  | AA  |    |   |     |
|                                         |         |          |         |          |         |          |        |        |         |          |         |          | Section 216 |         |          |         |       |         |        |      |     |     |     |     |    |   |     |
|                                         | (17846) | 17846    | 17860   | 17870    | 17880   | 17890    | 17900  | 17910  | 17928   |          |         |          |             |         |          |         |       |         |        |      |     |     |     |     |    |   |     |
| K12 Zwischenstück 255.328 - 290.948     | (17516) | ACCTTT   | TGATAA  | TACGCG   | AAA     | TGCAAG   | CAAG   | CTTGC  | ACATGG  | GGCAG    | CCACC   | GATCCG   | TCCT        | TACGG   | ATTCA    | AA      | CGG   | CTG     | CTG    |      |     |     |     |     |    |   |     |
| SARS-CoV-2 Reference Genome NC 045512.2 | (14674) | CCGGT    | AATTT   | TAA      | ---     | AAA      | GAGTT  | CTT    | TATGA   | CTT      | TG      | ---      | TGTGT       | ---     | CTAAG    | GGTT    | ---   | TC      | TTA    | GGA  | AGG | AA  | GTT | CTG | TG |   |     |
| Consensus                               | (17846) | CC       | T       | AT       | T       | A        | AAA    | C      | C       | CTT      | C       | TG       | G           | C       | A        | G       | T     | TC      | TA     | GGA  | AA  |     | CTG | TG  |    |   |     |
|                                         |         |          |         |          |         |          |        |        |         |          |         |          | Section 217 |         |          |         |       |         |        |      |     |     |     |     |    |   |     |
|                                         | (17929) | 17929    | 17940   | 17950    | 17960   | 17970    | 17980  | 17990  | 18000   | 18011    |         |          |             |         |          |         |       |         |        |      |     |     |     |     |    |   |     |
| K12 Zwischenstück 255.328 - 290.948     | (17599) | GCTCG    | ATAACAC | AA       | CAGAA   | TGG      | -CTGG  | CTGAAG | CGG     | CGCG     | ATCA    | -CGCTT   | -TCATC      | AAAGGG  | GGCCCC   | ATA     | CCC   | CGG     | GTT    |      |     |     |     |     |    |   |     |
| SARS-CoV-2 Reference Genome NC 045512.2 | (14748) | ATT--    | AAACAC  | TTCT     | TTCT    | TGCT     | CAGGA  | TG     | GTAAT   | GC       | TGCT    | ATCA     | GCGAT       | TTATG   | ACTATC   | GTTAT   | AAT   | CTA     | CCAA   | CAAT |     |     |     |     |    |   |     |
| Consensus                               | (17929) | T        | A       | AACAC    | C       |          | TG     | C      | GG      | TG       |         | GC       |             | ATCA    | CG       | TT      | T     | A       | A      | G    | A   | C   | CC  | C   | T  |   |     |



Sars-CoV-2 & E.coli K12 Zwischenstückapr.apr

|                                                 |       |        |         |           |        |          |         |             |          |                                                                             |
|-------------------------------------------------|-------|--------|---------|-----------|--------|----------|---------|-------------|----------|-----------------------------------------------------------------------------|
|                                                 |       |        |         |           |        |          |         |             |          | Section 218                                                                 |
| (18012)                                         | 18012 | 18020  | 18030   | 18040     | 18050  | 18060    | 18070   | 18080       | 18094    |                                                                             |
| K12 Zwischenstück 255.328 - 290.948 (17679)     | GATG  | GCCTGA | AAACAA  | ACAATG    | CTACAG | CCAGACTG | GC      | TGTTGA      | GCTGC    | AAATCTCTCA                                                                  |
| SARS-CoV-2 Reference Genome NC_045512.2 (14829) | GT--  | GTGATA | TCAGACA | CTA       | TTTGT  | TAGTTGAA | GT      | TGTTGA      | T---     | AAATCTCTCA                                                                  |
| Consensus (18012)                               | G     | G G    | A C A   | A T C T A | G      |          | G       | T G T T G A |          | A A T C T G T G T T A C T G C T A                                           |
|                                                 |       |        |         |           |        |          |         |             |          | Section 219                                                                 |
| (18095)                                         | 18095 | 18100  | 18110   | 18120     | 18130  | 18140    | 18150   | 18160       | 18177    |                                                                             |
| K12 Zwischenstück 255.328 - 290.948 (17762)     | CC    | AGCCCT | TGC     | CCG       | CCA    | GACGG    | GT      | TTA         | CATC     | CCT                                                                         |
| SARS-CoV-2 Reference Genome NC_045512.2 (14903) | TT    | AA---  | TGC     | TAA       | CCA    | A---     | GT      | ---         | CATC     | GTC                                                                         |
| Consensus (18095)                               |       | A      | T G C   | C C A     |        | G T      |         | C A T C     |          | A A A C G C A A A T --- C A G C T G G T T T C C A T --- T T A A T A A A T G |
|                                                 |       |        |         |           |        |          |         |             |          | Section 220                                                                 |
| (18178)                                         | 18178 | 18190  | 18200   | 18210     | 18220  | 18230    | 18240   | 18250       | 18260    |                                                                             |
| K12 Zwischenstück 255.328 - 290.948 (17845)     | GTATT | GT     | TCA     | GC        | GG     | GC       | AT      | GC          | T        | GATG                                                                        |
| SARS-CoV-2 Reference Genome NC_045512.2 (14967) | GG--- | GT     | AAG     | GC        | TAG    | ACT      | T       | TATG        | AT--     | TCAATG                                                                      |
| Consensus (18178)                               | G     | GT     | GC      | G C T     | T      | ATG      | T       | A           | G        | TATG GGA GAT C T TC CATAT                                                   |
|                                                 |       |        |         |           |        |          |         |             |          | Section 221                                                                 |
| (18261)                                         | 18261 | 18270  | 18280   | 18290     | 18300  | 18310    | 18320   | 18330       | 18343    |                                                                             |
| K12 Zwischenstück 255.328 - 290.948 (17927)     | TG    | AG     | CGC     | AG        | TGTC   | CA       | CC      | ACG         | CGAT     | CCGCACGG                                                                    |
| SARS-CoV-2 Reference Genome NC_045512.2 (15033) | AA    | AA     | CGTAA   | TGTC      | AT     | CC       | CTA     | CTAT        | AACTCAAA | TGAA                                                                        |
| Consensus (18261)                               |       | A      | C G A   | T G T C   |        | C C      |         | C A T       |          | T G A A T A G C G T G A A C C C G G G A C G C T G G T G A T T G             |
|                                                 |       |        |         |           |        |          |         |             |          | Section 222                                                                 |
| (18344)                                         | 18344 | 18350  | 18360   | 18370     | 18380  | 18390    | 18400   | 18410       | 18426    |                                                                             |
| K12 Zwischenstück 255.328 - 290.948 (18010)     | AA    | GG     | GACC    | TG        | TCC    | AGT      | TACT    | TC          | GAG      | -                                                                           |
| SARS-CoV-2 Reference Genome NC_045512.2 (15116) | GT    | GT     | CTCTA   | CT        | TGT    | AGT      | -       | ACT         | TAT      | GAC                                                                         |
| Consensus (18344)                               |       | G C    | T T     | AGT       | ACT    | GAC      | A       | ACA         | TCATC    | A                                                                           |
|                                                 |       |        |         |           |        |          |         |             |          | Section 223                                                                 |
| (18427)                                         | 18427 | 18440  | 18450   | 18460     | 18470  | 18480    | 18490   | 18509       |          |                                                                             |
| K12 Zwischenstück 255.328 - 290.948 (18087)     | GCAC  | GT     | TTTCAT  | GA        | CTCT   | GC       | TGTGGA  | AA          | ACCATCAA | GGG                                                                         |
| SARS-CoV-2 Reference Genome NC_045512.2 (15198) | TGTA  | GT     | AAATTG  | GA        | ACAA   | GC       | AAATTCT | AT          | TGGTGGTT | GGC                                                                         |
| Consensus (18427)                               |       | GT     |         | GA        | GC     |          | A       |             | GGC      | ACAT T A C GT T T G G G AG AA                                               |
|                                                 |       |        |         |           |        |          |         |             |          | Section 224                                                                 |
| (18510)                                         | 18510 | 18520  | 18530   | 18540     | 18550  | 18560    | 18570   | 18580       | 18592    |                                                                             |
| K12 Zwischenstück 255.328 - 290.948 (18170)     | G     | CC     | AC      | AG        | GG     | CGGT     | TTA     | TATC        | GCCGC    | TAT                                                                         |
| SARS-CoV-2 Reference Genome NC_045512.2 (15278) | A     | CC     | TT      | AT        | GG     | GTTG     | G       | TATC        | CTAAA    | TGT                                                                         |
| Consensus (18510)                               |       | CC     | A       | GG        |        | G        |         | TATC        |          | T T AT GA C CATGC AA G T AAT GC T A T C TG                                  |



Sars-CoV-2 & E.coli K12 Zwischenstück: apr.apr

|                                                 |         |             |       |       |       |       |       |       |       |       |     |
|-------------------------------------------------|---------|-------------|-------|-------|-------|-------|-------|-------|-------|-------|-----|
|                                                 |         | Section 225 |       |       |       |       |       |       |       |       |     |
|                                                 | (18593) | 18593       | 18600 | 18610 | 18620 | 18630 | 18640 | 18650 | 18660 | 18675 |     |
| K12 Zwischenstück 255.328 - 290.948 (18253)     |         | G           | CG    | GG    | AA    | AGC   | CAG   | AA    | AA    | GAT   | CG  |
| SARS-CoV-2 Reference Genome NC_045512.2 (15357) |         | T           | CG    | CA    | AA    | ---   | CAT   | AA    | CG    | T     | GT  |
| Consensus (18593)                               |         | CG          | AA    | CA    | AA    | T     | G     | TG    | CT    | G     |     |
|                                                 |         | Section 226 |       |       |       |       |       |       |       |       |     |
|                                                 | (18676) | 18676       | 18690 | 18700 | 18710 | 18720 | 18730 | 18740 | 18758 |       |     |
| K12 Zwischenstück 255.328 - 290.948 (18335)     |         | G           | TGG   | AA    | CCC   | G     | CG    | TGG   | CGT   | ACT   | GCC |
| SARS-CoV-2 Reference Genome NC_045512.2 (15436) |         | A           | TGG   | TC    | A     | TGT   | GT    | GG    | GG    | TTC   | ACT |
| Consensus (18676)                               |         | TGG         | A     | G     | GG    | GG    | ACT   | T     | C     | A     | G   |
|                                                 |         | Section 227 |       |       |       |       |       |       |       |       |     |
|                                                 | (18759) | 18759       | 18770 | 18780 | 18790 | 18800 | 18810 | 18820 | 18830 | 18841 |     |
| K12 Zwischenstück 255.328 - 290.948 (18417)     |         | A           | T     | C     | AGG   | G     | AGG   | TG    | TG    | CG    | GG  |
| SARS-CoV-2 Reference Genome NC_045512.2 (15517) |         | G           | T     | T     | T     | T     | A     | C     | A     | T     | T   |
| Consensus (18759)                               |         | T           | A     | TG    | T     | C     | CG    | G     | CA    | T     | AA  |
|                                                 |         | Section 228 |       |       |       |       |       |       |       |       |     |
|                                                 | (18842) | 18842       | 18850 | 18860 | 18870 | 18880 | 18890 | 18900 | 18910 | 18924 |     |
| K12 Zwischenstück 255.328 - 290.948 (18499)     |         | A           | TG    | A     | CG    | GC    | T     | T     | A     | T     | C   |
| SARS-CoV-2 Reference Genome NC_045512.2 (15596) |         | A           | TG    | T     | C     | CG    | AA    | T     | ---   | TT    | A   |
| Consensus (18842)                               |         | ATG         | C     | GC    | T     | TT    | C     | CAC   | AG    | CT    | T   |
|                                                 |         | Section 229 |       |       |       |       |       |       |       |       |     |
|                                                 | (18925) | 18925       | 18930 | 18940 | 18950 | 18960 | 18970 | 18980 | 18990 | 19007 |     |
| K12 Zwischenstück 255.328 - 290.948 (18582)     |         | C           | AG    | G     | AG    | AA    | AG    | CC    | AG    | AA    | AC  |
| SARS-CoV-2 Reference Genome NC_045512.2 (15667) |         | A           | A     | T     | G     | AG    | ---   | TT    | TT    | A     | CG  |
| Consensus (18925)                               |         | A           | G     | AG    | TT    | CG    | CA    | T     | G     | AC    | TT  |
|                                                 |         | Section 230 |       |       |       |       |       |       |       |       |     |
|                                                 | (19008) | 19008       | 19020 | 19030 | 19040 | 19050 | 19060 | 19070 | 19080 | 19090 |     |
| K12 Zwischenstück 255.328 - 290.948 (18665)     |         | AC          | TCA   | G     | T     | C     | AT    | TT    | CA    | TT    | CT  |
| SARS-CoV-2 Reference Genome NC_045512.2 (15735) |         | TT          | TCA   | ---   | AT    | AG    | CA    | CT    | TA    | AG    | CT  |
| Consensus (19008)                               |         | TCA         | AT    | CA    | TT    | T     | CAT   | T     | G     | C     | A   |
|                                                 |         | Section 231 |       |       |       |       |       |       |       |       |     |
|                                                 | (19091) | 19091       | 19100 | 19110 | 19120 | 19130 | 19140 | 19150 | 19160 | 19173 |     |
| K12 Zwischenstück 255.328 - 290.948 (18747)     |         | C           | G     | CC    | A     | TT    | T     | A     | GG    | CG    | T   |
| SARS-CoV-2 Reference Genome NC_045512.2 (15813) |         | T           | G     | TT    | ---   | TT    | T     | A     | GG    | CG    | T   |
| Consensus (19091)                               |         | G           | TT    | T     | A     | G     | C     | A     | C     | A     | A   |

Sars-CoV-2 & E.coli K12 Zwischenstück: apr.apr

|                                                 |         |             |       |       |       |       |       |       |       |       |    |
|-------------------------------------------------|---------|-------------|-------|-------|-------|-------|-------|-------|-------|-------|----|
|                                                 |         | Section 232 |       |       |       |       |       |       |       |       |    |
|                                                 | (19174) | 19174       | 19180 | 19190 | 19200 | 19210 | 19220 | 19230 | 19240 | 19256 |    |
| K12 Zwischenstück 255.328 - 290.948 (18828)     |         | CA          | GC    | GT    | GA    | TA    | CA    | TC    | GC    | CA    | GT |
| SARS-CoV-2 Reference Genome NC_045512.2 (15890) |         | CA          | AT    | CT    | AG    | TA    | CA    | GG    | TA    | CA    | GT |
| Consensus (19174)                               |         | CA          | G     | A     | T     | A     | A     | G     | G     | T     | G  |
|                                                 |         | Section 233 |       |       |       |       |       |       |       |       |    |
|                                                 | (19257) | 19257       | 19270 | 19280 | 19290 | 19300 | 19310 | 19320 | 19339 |       |    |
| K12 Zwischenstück 255.328 - 290.948 (18909)     |         | G           | AT    | G     | AT    | G     | AT    | G     | AT    | G     | AT |
| SARS-CoV-2 Reference Genome NC_045512.2 (15970) |         | G           | TA    | G     | AT    | G     | AT    | G     | AT    | G     | AT |
| Consensus (19257)                               |         | G           | G     | A     | T     | G     |       |       |       |       |    |
|                                                 |         | Section 234 |       |       |       |       |       |       |       |       |    |
|                                                 | (19340) | 19340       | 19350 | 19360 | 19370 | 19380 | 19390 | 19400 | 19410 | 19422 |    |
| K12 Zwischenstück 255.328 - 290.948 (18989)     |         | G           | T     | G     | AT    | G     | AT    | G     | AT    | G     | AT |
| SARS-CoV-2 Reference Genome NC_045512.2 (16038) |         | T           | T     | A     | C     | C     | A     | T     | A     | C     | C  |
| Consensus (19340)                               |         | T           |       | C     | T     | A     | A     | T     | C     | T     | A  |
|                                                 |         | Section 235 |       |       |       |       |       |       |       |       |    |
|                                                 | (19423) | 19423       | 19430 | 19440 | 19450 | 19460 | 19470 | 19480 | 19490 | 19505 |    |
| K12 Zwischenstück 255.328 - 290.948 (19072)     |         | T           | G     | T     | G     | AT    | G     | AT    | G     | AT    | G  |
| SARS-CoV-2 Reference Genome NC_045512.2 (16121) |         | A           | G     | T     | A     | C     | A     | T     | A     | C     | A  |
| Consensus (19423)                               |         | G           | T     |       |       |       |       |       |       |       |    |
|                                                 |         | Section 236 |       |       |       |       |       |       |       |       |    |
|                                                 | (19506) | 19506       | 19520 | 19530 | 19540 | 19550 | 19560 | 19570 | 19588 |       |    |
| K12 Zwischenstück 255.328 - 290.948 (19151)     |         | C           | A     | T     | G     | C     | T     | G     | C     | T     | G  |
| SARS-CoV-2 Reference Genome NC_045512.2 (16204) |         | G           | A     | G     | C     | T     | A     | G     | C     | T     | A  |
| Consensus (19506)                               |         | A           | G     | C     | T     |       |       |       |       |       |    |
|                                                 |         | Section 237 |       |       |       |       |       |       |       |       |    |
|                                                 | (19589) | 19589       | 19600 | 19610 | 19620 | 19630 | 19640 | 19650 | 19660 | 19671 |    |
| K12 Zwischenstück 255.328 - 290.948 (19234)     |         | T           | G     | C     | C     | A     | T     | G     | C     | C     | A  |
| SARS-CoV-2 Reference Genome NC_045512.2 (16284) |         | T           | G     | C     | C     | A     | T     | G     | C     | C     | A  |
| Consensus (19589)                               |         | T           | G     | T     | T     | G     | C     | T     | T     |       |    |
|                                                 |         | Section 238 |       |       |       |       |       |       |       |       |    |
|                                                 | (19672) | 19672       | 19680 | 19690 | 19700 | 19710 | 19720 | 19730 | 19740 | 19754 |    |
| K12 Zwischenstück 255.328 - 290.948 (19317)     |         | G           | A     | T     | G     | G     | T     | G     | A     | T     | G  |
| SARS-CoV-2 Reference Genome NC_045512.2 (16346) |         | -----       | C     | A     | T     | C     | A     | T     | C     | A     | T  |
| Consensus (19672)                               |         |             | C     | A     | T     | C     | A     | T     | C     | A     | T  |

Sars-CoV-2 & E.coli K12 Zwischenstückeaapr.apr

|                                                 |                   |                           |                       |                       |                           |                                 |                                     |                               |                     |                     |
|-------------------------------------------------|-------------------|---------------------------|-----------------------|-----------------------|---------------------------|---------------------------------|-------------------------------------|-------------------------------|---------------------|---------------------|
|                                                 |                   |                           |                       |                       |                           |                                 |                                     |                               |                     | Section 239         |
| (19755)                                         | 19755             | 19760                     | 19770                 | 19780                 | 19790                     | 19800                           | 19810                               | 19820                         | 19837               |                     |
| K12 Zwischenstück 255.328 - 290.948 (19399)     | C G G G           | C C A G T T G A           | T G C T G C T C C     | A G C A G G T G G C G | G A A A T T C A T G       | A T G G T G G T G C G G T       | C C G G C A A G G C                 | G C T A T C C A               | G G G A T A A C C G |                     |
| SARS-CoV-2 Reference Genome NC_045512.2 (16418) | C T --            | C A A C T T A --          | C T T --              | A G A G G T A T G A   | G C T A T T A T G         | T A A A T C A C A T A A A       | C C A C C A T T A                   | G T T T T C C A               | T T G T --          | G                   |
| Consensus (19755)                               | C                 | C A T T A                 | C T                   | A G A G G T           | G A T T T G               | T                               | C C C A                             | G T T C C A                   | G                   | G                   |
|                                                 |                   |                           |                       |                       |                           |                                 |                                     |                               |                     | Section 240         |
| (19838)                                         | 19838             | 19850                     | 19860                 | 19870                 | 19880                     | 19890                           | 19900                               | 19910                         | 19920               |                     |
| K12 Zwischenstück 255.328 - 290.948 (19487)     | G G C A A A       | C A G A C G C A T         | G G A G G C G A       | T T T C G T A C A     | G A G C A T C T T C       | C A T C G C G C C A T C         | G C T C A G G T                     | T G T A C C A A T G C         | T G C A T G C A G T |                     |
| SARS-CoV-2 Reference Genome NC_045512.2 (16488) | T G C T A A       | T G G A C A A G T         | T --                  | T T T G G T T A       | T A T A A A A A           | T A C A T --                    | G T G T T G G T                     | A G C G A T A A T G T         | T A C T G A C T     | T                   |
| Consensus (19838)                               | G C A A           | G A C T                   |                       | T T T G T             | A A A T C A T             |                                 | G G G T G                           | A A T G T C T G               |                     | T                   |
|                                                 |                   |                           |                       |                       |                           |                                 |                                     |                               |                     | Section 241         |
| (19921)                                         | 19921             | 19930                     | 19940                 | 19950                 | 19960                     | 19970                           | 19980                               | 19990                         | 20003               |                     |
| K12 Zwischenstück 255.328 - 290.948 (19565)     | G A A T G C       | G -- T A G C A            | T G G T T T C C A     | G C G G A T A A       | G G T C G C G G           | C C A T T A C                   | C A G C C T T G G                   | G G T A A A A C               | G G C T C G A T G A | C T T C C A C C A T |
| SARS-CoV-2 Reference Genome NC_045512.2 (16554) | T A A T G C       | A A T G C A C A           | T G T G --            | A C T G G A C A A     | A T -- G C T G G          | T G A T T A C                   | A T -- T T T A G                    | C T A A C A C T G T A C       | T G A A A G A C     | T C A A G           |
| Consensus (19921)                               | A A T G C         | T G C A                   | T T A G G A A A       | G C G G               | A T T A C                 |                                 | T T G T A A A C                     | T T G A                       | C C A               |                     |
|                                                 |                   |                           |                       |                       |                           |                                 |                                     |                               |                     | Section 242         |
| (20004)                                         | 20004             | 20010                     | 20020                 | 20030                 | 20040                     | 20050                           | 20060                               | 20070                         | 20086               |                     |
| K12 Zwischenstück 255.328 - 290.948 (19647)     | G T T T T         | G C C A T G               | G C A G A A T C       | T G C T C C A T G C   | --- G G G ---             | A C A A G A A A A T             | C T C T T T T C                     | T G G T C T G A C             | G G C G C T T A C   | T G C T G A A T     |
| SARS-CoV-2 Reference Genome NC_045512.2 (16630) | C T T T T         | T G C A --                | G C A G A A A C       | G C T C A A A G C     | T A C T G A G             | G A G A C A T T T A A A         | C T G T C T T A                     | T G G T A T G C T A C T G     | T A C G --          | T G A A G           |
| Consensus (20004)                               | T T T T           | C A G C A G A A           | C G C T C A G C       |                       | G G A C A                 | A A A C T T                     | T T T G G T                         | T C C T A C                   | T G A A             |                     |
|                                                 |                   |                           |                       |                       |                           |                                 |                                     |                               |                     | Section 243         |
| (20087)                                         | 20087             | 20100                     | 20110                 | 20120                 | 20130                     | 20140                           | 20150                               | 20169                         |                     |                     |
| K12 Zwischenstück 255.328 - 290.948 (19723)     | T C A C T G T C   | G G C G A A G G T A A     | G T T G A T G A C     | T C A T G A T G A A   | C C C T G T --            | -- T C T A T G G                | C T C C A G A T G A C A A A C A T   | G A T C T C A T A T C A       |                     |                     |
| SARS-CoV-2 Reference Genome NC_045512.2 (16706) | T G --            | C T G T C T G A C A G A G | A A T T A C A T C T T | T C A T G G --        | G A A G T T G G T A A A C | C T A G A C C A C C A C T       | T A A C C G A A A T T A T G T C T T | T T A C T                     |                     |                     |
| Consensus (20087)                               | T C T G T C       | G A G A A T               | A T T C A T G         | G A A G T             |                           | C T A C C A                     | T A C A A T A T C T                 |                               |                     |                     |
|                                                 |                   |                           |                       |                       |                           |                                 |                                     |                               |                     | Section 244         |
| (20170)                                         | 20170             | 20180                     | 20190                 | 20200                 | 20210                     | 20220                           | 20230                               | 20240                         | 20252               |                     |
| K12 Zwischenstück 255.328 - 290.948 (19803)     | G G G A C T       | T G T T C G C             | A C C T T C G G       | A G G C G T T A T G A | G C T G --                | G C G G C C C T T               | T T T G T A T C T                   | G A T T A T A A T C C C C A C | C C G C T A T T A A |                     |
| SARS-CoV-2 Reference Genome NC_045512.2 (16786) | G G T T A T       | C G T G T A A C           | T A A A A A C A G     | T A A A G T A C A A A | A T A G A G A G A C A C C | T T T G A A A A A G             | G T G A C T A T A T G G T G A T G   | C T G T T G T T A             |                     |                     |
| Consensus (20170)                               | G G T G T T       | C T A A A A               | C G G T A A A         | A T A G A G A C       |                           | T T T G A G T A T A             |                                     |                               |                     |                     |
|                                                 |                   |                           |                       |                       |                           |                                 |                                     |                               |                     | Section 245         |
| (20253)                                         | 20253             | 20260                     | 20270                 | 20280                 | 20290                     | 20300                           | 20310                               | 20320                         | 20335               |                     |
| K12 Zwischenstück 255.328 - 290.948 (19884)     | G C G C C C G G   | G C G G G C A T           | C T G C G T C T G G   | T G C A G G --        | G T T G A C T T T T G     | C A T T C T G T T A A           | C A A A C G C G G T A T A A C       | A A A C C T T C T T           | T G G               |                     |
| SARS-CoV-2 Reference Genome NC_045512.2 (16869) | C C G A G G T A C | A A C A A C T T           | A C A A A T A A A A   | T G T T G G T G A T   | T A T T T T G --          | T G C T G A C A T C A C A T A C | A G T A A T G C A --                | T T A A G T G C               |                     |                     |
| Consensus (20253)                               | C G C C C G       | C A T T                   | T T G G T A           | T T T G               |                           | T C T G A C A C A C             | G T A C A T T T                     |                               |                     |                     |

Sars-CoV-2 & E.coli K12 Zwischenstück.eapr.apr

|                                                 |         |          |        |         |          |        |        |        |         |             |
|-------------------------------------------------|---------|----------|--------|---------|----------|--------|--------|--------|---------|-------------|
|                                                 |         |          |        |         |          |        |        |        |         | Section 246 |
| (20336)                                         | 20336   | 20350    | 20360  | 20370   | 20380    | 20390  | 20400  | 20418  |         |             |
| K12 Zwischenstück 255.328 - 290.948 (19966)     | ATGTTT  | AGATGT   | CCATAC | GTTT    | AGAA     | GGTTAT | ATGCAA | ACAAC  | ACAACA  | AAATG       |
| SARS-CoV-2 Reference Genome NC_045512.2 (16947) | ACCTAC  | ACTAGT   | GCCACA | AGAGCA  | CTAT     | GTTAGA | -----  | ATTAC  | TGGCTT  | ATA         |
| Consensus (20336)                               | A       | T        | A      | GT      | CCA      | A      | G      | A      | A       | AC          |
|                                                 |         |          |        |         |          |        |        |        |         | Section 247 |
| (20419)                                         | 20419   | 20430    | 20440  | 20450   | 20460    | 20470  | 20480  | 20490  | 20501   |             |
| K12 Zwischenstück 255.328 - 290.948 (20048)     | TCACCTG | ATAT     | TGGT   | TTTCCT  | TGGGCG   | CGTGAT | TG     | GCA    | CAGGAT  | TATTCT      |
| SARS-CoV-2 Reference Genome NC_045512.2 (17023) | TC      | TAGCA    | ATGT   | TGG     | AAATTAT  | CAAAAG | GGT    | TGGTAT | GCAAAAG | --TATTCT    |
| Consensus (20419)                               | TC      |          | AT     | TGC     |          | T      | G      | TG     | T       | GCA         |
|                                                 |         |          |        |         |          |        |        |        |         | Section 248 |
| (20502)                                         | 20502   | 20510    | 20520  | 20530   | 20540    | 20550  | 20560  | 20570  | 20584   |             |
| K12 Zwischenstück 255.328 - 290.948 (20130)     | GCG     | CGGGAAC  | GCTGC  | TGGCCTA | CTGAT    | TGGT   | GG     | CTGG   | TG      | TC          |
| SARS-CoV-2 Reference Genome NC_045512.2 (17099) | AGA     | GTCATTTT | GCTAT  | TGGCCTA | GCTCTC   | TACT   | ACCTTC | TG     | TC      | GCATAG      |
| Consensus (20502)                               | G       |          | GCT    | TGGCCTA | CT       | T      | T      | C      | CT      | TG          |
|                                                 |         |          |        |         |          |        |        |        |         | Section 249 |
| (20585)                                         | 20585   | 20590    | 20600  | 20610   | 20620    | 20630  | 20640  | 20650  | 20667   |             |
| K12 Zwischenstück 255.328 - 290.948 (20213)     | GATGC   | -CGGAG   | ACC    | GAG     | CGT      | TT     | CACG   | TTT    | ATGCC   | GCGC        |
| SARS-CoV-2 Reference Genome NC_045512.2 (17179) | GATGC   | AC       | TATG   | AG      | GCA      | TT     | AAAT   | AT     | TGCC    | TATAG       |
| Consensus (20585)                               | GATGC   | C        | G      | G       | AG       | TT     | A      | T      | T       | TGCC        |
|                                                 |         |          |        |         |          |        |        |        |         | Section 250 |
| (20668)                                         | 20668   | 20680    | 20690  | 20700   | 20710    | 20720  | 20730  | 20740  | 20750   |             |
| K12 Zwischenstück 255.328 - 290.948 (20293)     | AC      | TGGCT    | GACCT  | GGA     | CCGTGGCG | G      | TGGG   | TT     | CGAG    | CTT         |
| SARS-CoV-2 Reference Genome NC_045512.2 (17262) | TT      | TTGAT    | AAAT   | TCAA    | AGTGAATT | CAACAT | TT     | AGA    | ACAG    | TATGT       |
| Consensus (20668)                               |         | T        | G      | T       | A        | T      | A      |        | C       | TT          |
|                                                 |         |          |        |         |          |        |        |        |         | Section 251 |
| (20751)                                         | 20751   | 20760    | 20770  | 20780   | 20790    | 20800  | 20810  | 20820  | 20833   |             |
| K12 Zwischenstück 255.328 - 290.948 (20376)     | G       | TAT      | GGG    | CT      | GGT      | GCG    | TG     | GT     | TT      | CTGC        |
| SARS-CoV-2 Reference Genome NC_045512.2 (17342) | A       | TAT      | AGT    | TG      | CTT      | TGA    | TG     | AAA    | TT      | TCAATG      |
| Consensus (20751)                               |         | TAT      | G      | T       | T        | T      | TG     |        | TT      |             |
|                                                 |         |          |        |         |          |        |        |        |         | Section 252 |
| (20834)                                         | 20834   | 20840    | 20850  | 20860   | 20870    | 20880  | 20890  | 20900  | 20916   |             |
| K12 Zwischenstück 255.328 - 290.948 (20457)     | TTCTG   | GTTC     | TCGC   | TGG     | TCA      | AAG    | TG     | TCA    | CTATC   | ATCG        |
| SARS-CoV-2 Reference Genome NC_045512.2 (17422) | TATGT   | GTAC     | AT--   | TGG     | CGA      | CCC    | TG     | TCA    | -----   | ATTA        |
| Consensus (20834)                               | T       |          | GT     | C       | TGG      | A      | TG     | TCA    |         | AT          |

Sars-CoV-2 & E.coli K12 Zwischenstücke apr.apr

|                                         |         |             |            |             |            |         |           |            |        |          |          |          |          |       |         |       |       |       |       |        |       |       |     |
|-----------------------------------------|---------|-------------|------------|-------------|------------|---------|-----------|------------|--------|----------|----------|----------|----------|-------|---------|-------|-------|-------|-------|--------|-------|-------|-----|
|                                         |         | Section 253 |            |             |            |         |           |            |        |          |          |          |          |       |         |       |       |       |       |        |       |       |     |
|                                         |         | (20917)     | 20917      | 20930       | 20940      | 20950   | 20960     | 20970      | 20980  | 20999    |          |          |          |       |         |       |       |       |       |        |       |       |     |
| K12 Zwischenstück 255.328 - 290.948     | (20540) | G           | CAGGATGGC  | TCG--C      | CCGCGCCGG  | GGCTGA  | GTAAATATC | ACGGCAGAA  | AGGCTG | GTTCC-C  | GCACGG   | TGGC     | TTACCGAT | TTT   | TGA     |       |       |       |       |        |       |       |     |
| SARS-CoV-2 Reference Genome NC 045512.2 | (17491) | C           | CAGAAATATT | TCAAATT     | CAGTGTGTAG | GACTATG | AAACTATAG | GTCCAGACAT | GTTCC  | TCGAACT  | TGTC     | CGGCGTTG | TCC      | TG    | C       |       |       |       |       |        |       |       |     |
| Consensus (20917)                       |         |             | CAG AT     | TC          | C G G      | G CT A  | AA A A    | G          | AG C   | GTTCC    | CG A     | TG C     |          | T     | TG      |       |       |       |       |        |       |       |     |
|                                         |         | Section 254 |            |             |            |         |           |            |        |          |          |          |          |       |         |       |       |       |       |        |       |       |     |
|                                         |         | (21000)     | 21000      | 21010       | 21020      | 21030   | 21040     | 21050      | 21060  | 21070    | 21082    |          |          |       |         |       |       |       |       |        |       |       |     |
| K12 Zwischenstück 255.328 - 290.948     | (20620) | TG          | ACTATGGTGG | CAGTGA      | AACTTT     | GCTTTT  | TTCGGGT   | ACC        | GAGCTT | TATCG    | GCAATT   | TGCC     | GC       | CGGTG | AAAC    | GGA   | AAAC  | CCGC  | GCAA  |        |       |       |     |
| SARS-CoV-2 Reference Genome NC 045512.2 | (17574) | TG          | AAATGTTG   | ACATG       | TGAGT      | TGCTTT  | GGT       | TATGA      | TAAT   | AA       | GC       | TTAAA    | GC       | ACA   | TAA     | GAC   | AAAT  | CAGCT | CAAT  |        |       |       |     |
| Consensus (21000)                       |         |             | TGA        | TG TG CA TG | T          | GCTTT   | GG T      | GA         | T AT   | GC       | TT       | GC       | T        | AA    | G       | AAA   | C     | GC    | CAA   |        |       |       |     |
|                                         |         | Section 255 |            |             |            |         |           |            |        |          |          |          |          |       |         |       |       |       |       |        |       |       |     |
|                                         |         | (21083)     | 21083      | 21090       | 21100      | 21110   | 21120     | 21130      | 21140  | 21150    | 21165    |          |          |       |         |       |       |       |       |        |       |       |     |
| K12 Zwischenstück 255.328 - 290.948     | (20703) | G           | --TTATCCC  | GGTAG       | CGATTTC    | GTACTAC | CAATCGC   | GC         | GACTGA | TTATTTTC | --TTT    | TATCGGC  | AC       | CGTGT | TTTGT   | GCT   | GGC   | AG    | CG    |        |       |       |     |
| SARS-CoV-2 Reference Genome NC 045512.2 | (17648) | G           | CTTTAA     | AAATGTT     | TTTAT      | AAGGT   | GTGTAT    | CA         | CGCAT  | GATGTT   | TCATCT   | GCAA     | TTA      | CA    | GGC     | CA    | CAAA  | TAG   | CG    |        |       |       |     |
| Consensus (21083)                       |         |             | G          | TTA         | G T        | A       | GT        | TA CA      | CGC    | GA       | T AT T C | TT A     | GGC      | C     | T       | G G   | G     | AG    | G     |        |       |       |     |
|                                         |         | Section 256 |            |             |            |         |           |            |        |          |          |          |          |       |         |       |       |       |       |        |       |       |     |
|                                         |         | (21166)     | 21166      | 21180       | 21190      | 21200   | 21210     | 21220      | 21230  | 21248    |          |          |          |       |         |       |       |       |       |        |       |       |     |
| K12 Zwischenstück 255.328 - 290.948     | (20782) | TG          | ATCC       | GATGCA      | G          | AGGTGG  | CGTGGG    | GAGAGAAA   | AGC    | CCGT     | TGT      | TGCT     | TGGTAT   | TTGAG | AAAGTAG | G     | GATCC | GTA   | CGCC  | GCTGAT |       |       |     |
| SARS-CoV-2 Reference Genome NC 045512.2 | (17730) | --          | ATCC       | TTACAC      | GTA        | ACCCT   | CGTGGG    | GAGAGAAA   | AGC    | TGT      | TTTAT    | TTTACC   | TTATA    | ATT   | CACA    | G     | ATGCT | GTA   | GCCT  | CAAG   |       |       |     |
| Consensus (21166)                       |         |             | AT CC      |             | G A        |         | GC        | TGGAGAAA   | AGC    | GT T T   |          |          | TT       | A     |         | G     | AT C  | GTA   | GCC   | C A    |       |       |     |
|                                         |         | Section 257 |            |             |            |         |           |            |        |          |          |          |          |       |         |       |       |       |       |        |       |       |     |
|                                         |         | (21249)     | 21249      | 21260       | 21270      | 21280   | 21290     | 21300      | 21310  | 21320    | 21331    |          |          |       |         |       |       |       |       |        |       |       |     |
| K12 Zwischenstück 255.328 - 290.948     | (20865) | AT          | TTT        | TAACT       | TCGTG      | ATC     | CTG       | ACGG       | CTA    | TTCT     | TTCTG    | CA       | GC       | GAA   | CTC     | CGGGT | ATATG | CT    | CCGGG | CGC    |       |       |     |
| SARS-CoV-2 Reference Genome NC 045512.2 | (17809) | AT          | TTT        | TGGAC       | TACCA      | ACT     | CAA       | ACTG       | ---    | TTGAT    | TTTCA    | CA       | CAG      | GG    | CTC     | AGA   | ---   | ATATG | ACT   | ---    |       |       |     |
| Consensus (21249)                       |         |             | ATTTT      |             | T          | A       | C         | AC G       |        | TT       | TTC      | CA       | G        | CTC   | G       |       | ATATG | CT    |       | ATG    |       |       |     |
|                                         |         | Section 258 |            |             |            |         |           |            |        |          |          |          |          |       |         |       |       |       |       |        |       |       |     |
|                                         |         | (21332)     | 21332      | 21340       | 21350      | 21360   | 21370     | 21380      | 21390  | 21400    | 21414    |          |          |       |         |       |       |       |       |        |       |       |     |
| K12 Zwischenstück 255.328 - 290.948     | (20948) | G           | TCGAATG    | AACGT       | TACGCT     | ACCG    | GC        | TGTT       | TTG    | CGCGAGT  | AAC      | GAA      | AAAC     | CGGCG | TG      | CACT  | GAC   | GGCG  | CGT   | GCTAG  | TATGC |       |     |
| SARS-CoV-2 Reference Genome NC 045512.2 | (17872) | T           | TC         | ACTCA       | AAC        | CACT    | GAA       | AC         | AGCT   | CACT     | CTTG     | TAATGTA  | AAC      | AG    | ATTTA   | ATGT  | TG    | CA    | TAT   | TAC    | CAG   |       |     |
| Consensus (21332)                       |         |             | TC         |             | AAC        |         | G         | AC G       | C      | T        | TTG      |          | AAC      | A     |         |       | TGC   | A     | T     | C      | G     |       |     |
|                                         |         | Section 259 |            |             |            |         |           |            |        |          |          |          |          |       |         |       |       |       |       |        |       |       |     |
|                                         |         | (21415)     | 21415      | 21420       | 21430      | 21440   | 21450     | 21460      | 21470  | 21480    | 21497    |          |          |       |         |       |       |       |       |        |       |       |     |
| K12 Zwischenstück 255.328 - 290.948     | (21031) | TC          | GGTGGTGT   | TGCTGG      | CGCTGT     | TTTCCAG | CTGG      | TGG        | GCCCCG | ACA      | CGGT     | TATTTG   | TTG      | CGCT  | GTC     | GGC   | AA    | TC    | TCC   | GG     | GT    | TTGCG |     |
| SARS-CoV-2 Reference Genome NC 045512.2 | (17954) | T           | ---        | TTG         | CA         | TAA     | TG        | T          | ---    | TG       | A        | TAG      | AG       | CT    | T       | A     | TG    | ---   | ACA   | AG     | T     | TG    | CA  |
| Consensus (21415)                       |         |             | T          | T G         | T          | TG C    | TG T      |            |        | A        | C        | T        | TG       |       | ACA     | G     | T     |       | TT    | C      | GTC   | AA    | TCC |

Sars-CoV-2 & E.coli K12 Zwischenstück.epr.apr

|                                         |         |       |        |        |         |         |         |       |          |           |        |         |          |            |        |             |             |          |       |          |      |        |        |       |        |        |      |       |       |      |    |       |   |     |
|-----------------------------------------|---------|-------|--------|--------|---------|---------|---------|-------|----------|-----------|--------|---------|----------|------------|--------|-------------|-------------|----------|-------|----------|------|--------|--------|-------|--------|--------|------|-------|-------|------|----|-------|---|-----|
|                                         |         |       |        |        |         |         |         |       |          |           |        |         |          |            |        | Section 260 |             |          |       |          |      |        |        |       |        |        |      |       |       |      |    |       |   |     |
|                                         | (21498) | 21498 | 21510  | 21520  | 21530   | 21540   | 21550   | 21560 | 21570    | 21580     |        |         |          |            |        |             |             |          |       |          |      |        |        |       |        |        |      |       |       |      |    |       |   |     |
| K12 Zwischenstück 255.328 - 290.948     | (21114) | GTGGT | AGCGG  | TGTGGC | TGAGT   | TCTGC   | GCCTCGC | ATTTT | GT       | TTTTTC    | GT     | CGCCGT  | CACTCTGC | AACAAG     | GTAAGG | CATTGAGTGA  |             |          |       |          |      |        |        |       |        |        |      |       |       |      |    |       |   |     |
| SARS-CoV-2 Reference Genome NC_045512.2 | (18019) | ----- | AGGAA  | TGTGGC | A-AC    | TTTACAA | GC      | TGAAA | AT---    | GT        | AACAG  | GACTCTT | TAAAG--- | ATTGTA     | GTAAGG | TATCACTG    |             |          |       |          |      |        |        |       |        |        |      |       |       |      |    |       |   |     |
| Consensus                               | (21498) |       | AG     | TGTGGC | A T T   | GC      | AT      | GT    | G C C    | T A       | A      | GTAAGG  | A T A    | TG         |        |             |             |          |       |          |      |        |        |       |        |        |      |       |       |      |    |       |   |     |
|                                         |         |       |        |        |         |         |         |       |          |           |        |         |          |            |        |             | Section 261 |          |       |          |      |        |        |       |        |        |      |       |       |      |    |       |   |     |
|                                         | (21581) | 21581 | 21590  | 21600  | 21610   | 21620   | 21630   | 21640 | 21650    | 21663     |        |         |          |            |        |             |             |          |       |          |      |        |        |       |        |        |      |       |       |      |    |       |   |     |
| K12 Zwischenstück 255.328 - 290.948     | (21197) | A     | TTACAT | TAT    | TCGCGCG | CCGT    | GGTAT   | C     | CGTGGTGC | CAGT      | ATT    | AGGTT   | T        | TGTGCTGTGC | CTGGT  | GGCC        | TGTGTGG     | CTGG     | CAT   |          |      |        |        |       |        |        |      |       |       |      |    |       |   |     |
| SARS-CoV-2 Reference Genome NC_045512.2 | (18090) | G     | TTACAT | CC     | T       | -----   | CACA    | GGCAC | CTAC     | ACACCT    | CAGT   | TT      | GACAC    | TAAATT     | CAAAA  | CTGAA       | GGTT        | TATGT--- | GT    | TG       | CAT  |        |        |       |        |        |      |       |       |      |    |       |   |     |
| Consensus                               | (21581) |       | TTACAT | T      | C       |         | GG      | A C C |          |           | CAGT   | TT      | T        |            |        | CTG         | GG          | T TGT    | G TG  | CAT      |      |        |        |       |        |        |      |       |       |      |    |       |   |     |
|                                         |         |       |        |        |         |         |         |       |          |           |        |         |          |            |        |             | Section 262 |          |       |          |      |        |        |       |        |        |      |       |       |      |    |       |   |     |
|                                         | (21664) | 21664 | 21670  | 21680  | 21690   | 21700   | 21710   | 21720 | 21730    | 21746     |        |         |          |            |        |             |             |          |       |          |      |        |        |       |        |        |      |       |       |      |    |       |   |     |
| K12 Zwischenstück 255.328 - 290.948     | (21280) | T     | CGATC  | CA     | GCG     | CAG     | AGAA    | T-TG  | CGT      | TGTGG     | TGCGGG | TTAC    | CG       | TT         | TGT    | TG          | CGTT        | G        | TGCT  | ATG      | GTGC | TTAT   | TTCC   | TTA   | CT     | CA--   | A    |       |       |      |    |       |   |     |
| SARS-CoV-2 Reference Genome NC_045512.2 | (18165) | A     | CTGG   | CA     | TAC     | CTA     | AGGACA  | TG    | ACCT     | TATAG     | AAGACT | CAT     | CTC      | TAT        | TG     | TG          | GTT         | T        | TAAA  | ATGAA--  | TTAT | CAAG   | TTAT   | TGGTT | A      |        |      |       |       |      |    |       |   |     |
| Consensus                               | (21664) |       | C      | CA     | C       | AG      | A       | TG    | T T G    |           |        | C       | T        | TG         | TG     | GTT         | T           | ATG      |       |          | TTAT |        | TTA    | T     | A      |        |      |       |       |      |    |       |   |     |
|                                         |         |       |        |        |         |         |         |       |          |           |        |         |          |            |        |             | Section 263 |          |       |          |      |        |        |       |        |        |      |       |       |      |    |       |   |     |
|                                         | (21747) | 21747 | 21760  | 21770  | 21780   | 21790   | 21800   | 21810 | 21829    |           |        |         |          |            |        |             |             |          |       |          |      |        |        |       |        |        |      |       |       |      |    |       |   |     |
| K12 Zwischenstück 255.328 - 290.948     | (21360) | CCC   | CG     | AA     | AC      | GCAA    | AA      | CA    | GGAG     | GC        | AGAA   | CAT     | GT       | TCGC       | AGA    | ATAAA       | T           | CGT      | TACGC | G        | CT   | CCT    | CTT    | -     | GATAAA | ACAGGA | -    | TATC  | CTGCT |      |    |       |   |     |
| SARS-CoV-2 Reference Genome NC_045512.2 | (18246) | CCC   | TAA    | CA     | TG      | TTT     | AT      | CA    | CCC      | GC        | GA     | AGA     | -        | AGC        | TATA   | AGA         | CAT         | G        | TACGT | GCATG    | GAT  | TGG    | CTT    | C     | GAT    | GTCG   | AGGG | TG    | TC    | TGCT |    |       |   |     |
| Consensus                               | (21747) |       | CCC    | A      | A       | G       |         | A     | CA       | GC        | A      | A       | A        | T          | AGA    |             | T           | CGT      |       | G        | T    |        | CTT    | GAT   |        | AGG    | T    | TC    | TGCT  |      |    |       |   |     |
|                                         |         |       |        |        |         |         |         |       |          |           |        |         |          |            |        |             | Section 264 |          |       |          |      |        |        |       |        |        |      |       |       |      |    |       |   |     |
|                                         | (21830) | 21830 | 21840  | 21850  | 21860   | 21870   | 21880   | 21890 | 21900    | 21912     |        |         |          |            |        |             |             |          |       |          |      |        |        |       |        |        |      |       |       |      |    |       |   |     |
| K12 Zwischenstück 255.328 - 290.948     | (21441) | G     | CTG    | GAT    | G       | GC      | GAT     | TG    | CG       | AG        | GGA    | GCT     | GGA      | AG         | GCG    | AGG         | TG          | TA       | AC    | TT       | AGC  | C      | G      | ACAG  | CCT    | GT     | GGT  | CAG   | CC    | AA   | AG | TGCTG | G | TAG |
| SARS-CoV-2 Reference Genome NC_045512.2 | (18328) | A     | CTAG   | AG     | -       | GAA     | GC      | TG    | TG       | GT        | AC     | CA      | ATTT     | ---        | AC     | TTTT        | ACAG        | C        | TAGG  | TTTT     | CT   | ACAG   | ---    | GTG   | TAA    | -      | CC   | TAGT  | TGCTG | TACC |    |       |   |     |
| Consensus                               | (21830) |       | CT     | GA     | G       | GC      | T       | G     | AC       | A         | T      | A       | C        | A          | G      | TA          | TT          | C        | ACAG  |          |      |        | GTG    | T     | A      | CC     | A    | TGCTG |       |      |    |       |   |     |
|                                         |         |       |        |        |         |         |         |       |          |           |        |         |          |            |        |             | Section 265 |          |       |          |      |        |        |       |        |        |      |       |       |      |    |       |   |     |
|                                         | (21913) | 21913 | 21920  | 21930  | 21940   | 21950   | 21960   | 21970 | 21980    | 21995     |        |         |          |            |        |             |             |          |       |          |      |        |        |       |        |        |      |       |       |      |    |       |   |     |
| K12 Zwischenstück 255.328 - 290.948     | (21524) | AAA   | ACCGGA | GCT    | TAT     | CGG     | GAA     | AGT   | GC       | AT        | CCT    | GATT    | ACT      | TAC        | CGG    | GCGG        | GG          | GC       | AA    | TGCGCGAT | CAC  | TGCC   | AGCT   | -     | ATCA   | AGGC   |      |       |       |      |    |       |   |     |
| SARS-CoV-2 Reference Genome NC_045512.2 | (18402) | T     | AC     | AGTTAT | GT      | TGAT    | AC      | ACT   | A        | T         | A      | AT      | AC       | AGATT      | TTT    | TC          | CAG         | AGT      | TAGT  | GC       | TAA  | C----- | CAC    | GCC   | TG     | GAG    | ATCA | ATT   |       |      |    |       |   |     |
| Consensus                               | (21913) |       | A      | A      |         | G       | T       | AT    | C        | C         | A      | T       | AT       |            | GATT   | T           | C           | G        | G     | G        | GC   | AA     |        |       | CAC    | GCC    | G    | ATCA  |       |      |    |       |   |     |
|                                         |         |       |        |        |         |         |         |       |          |           |        |         |          |            |        |             | Section 266 |          |       |          |      |        |        |       |        |        |      |       |       |      |    |       |   |     |
|                                         | (21996) | 21996 | 22010  | 22020  | 22030   | 22040   | 22050   | 22060 | 22078    |           |        |         |          |            |        |             |             |          |       |          |      |        |        |       |        |        |      |       |       |      |    |       |   |     |
| K12 Zwischenstück 255.328 - 290.948     | (21606) | G     | ACG    | C      | GGCGGG  | CT      | TC      | GCCG  | CG       | GAGGTCTGG | AT     | GAA     | GCG      | CAG        | TC     | GAA         | AG          | CGC      | TGAT  | TGGC     | AAA  | AG     | GTGG   | AGC   | TG     | GCGC   | GT   | A     |       |      |    |       |   |     |
| SARS-CoV-2 Reference Genome NC_045512.2 | (18477) | T     | AA     | CA     | -----   | C       | CTC     | ATAC  | CA       | TTATGTACA | AA     | GGA     | CTT      | CCT        | TG     | GAA         | T           | TAG      | TGCGT | TATA     | AA   | GA     | TTGTAC | AAA   | TG     | TTAA   | GT   | G     |       |      |    |       |   |     |
| Consensus                               | (21996) |       | A      | C      |         | C       | TC      |       | C        | C         |        | A       | G        | A          | C      | T           | GAA         | G        | TG    | T        | AA   | A      | GT     | A     | TG     |        | GT   |       |       |      |    |       |   |     |

Sars-CoV-2 & E.coli K12 Zwischenstück.epr.apr

|                                                 |                       |                       |                    |                    |                |              |               |                  |            |                  |
|-------------------------------------------------|-----------------------|-----------------------|--------------------|--------------------|----------------|--------------|---------------|------------------|------------|------------------|
|                                                 |                       |                       |                    |                    |                |              |               |                  |            | Section 267      |
|                                                 | (22079)               | 22079                 | 22090              | 22100              | 22110          | 22120        | 22130         | 22140            | 22150      | 22161            |
| K12 Zwischenstück 255.328 - 290.948 (21689)     | AAGCCCGTGAAGCG-TA     | TCTGGCAGAGAACCG       | CGCAGGC            | GGGAACG            | CTTCTGGTGGCG   | GGATCCGTCGGG | CTTACGGCGCGT  |                  |            |                  |
| SARS-CoV-2 Reference Genome NC_045512.2 (18554) | ACACACTTAAATAATCT     | TCTGTACAGAGT---       | CGTATTTGT---       | CTTATGGGCA         | CATGGCTTTGAGTT | GACATCTATGAA | GT            |                  |            |                  |
| Consensus (22079)                               | A C C T A A           | T T C T G T C A G A G | C G A G            |                    | C T T T G G C  | G G T T G    | G C T         | G C T            |            | G T              |
|                                                 |                       |                       |                    |                    |                |              |               |                  |            | Section 268      |
|                                                 | (22162)               | 22162                 | 22170              | 22180              | 22190          | 22200        | 22210         | 22220            | 22230      | 22244            |
| K12 Zwischenstück 255.328 - 290.948 (21770)     | ATCTGCGCGATGGCTCTGAAT | ACCGTGGCGATTATCAT     | TGTAGCGTTGAGGCATTT | CAGGCGTTTCAT       | CGCCCGCGCGT    | TGGA         |               |                  |            |                  |
| SARS-CoV-2 Reference Genome NC_045512.2 (18629) | ATTTTGTGAATAAGGACCTGA | GCGCACCTGTGTCAT       | TGTGA--TAGACGTGCCA | CATGCTTTTCCACT---- | GCTTCAGA       |              |               |                  |            |                  |
| Consensus (22162)                               | A T T G G A           | A C G C T T T C T     | T G T T G A G      | C A G C T T T C    | C              |              |               |                  |            |                  |
|                                                 |                       |                       |                    |                    |                |              |               |                  |            | Section 269      |
|                                                 | (22245)               | 22245                 | 22250              | 22260              | 22270          | 22280        | 22290         | 22300            | 22310      | 22327            |
| K12 Zwischenstück 255.328 - 290.948 (21853)     | GCCTTGC               | TGGA                  | TGCC               | GGGGC              | GATCTGCTGGCCT  | TGCGAAACCT   | TGCCGAATTTT   | TCCGAGATTGAGGCGT | TGGCCGAGCT | GTT              |
| SARS-CoV-2 Reference Genome NC_045512.2 (18705) | CACCTTA               | TGCC                  | TGTTGG             | CATCAT             | TCTAT          | TGGATT       | TGATTACGTCTAT | AATCCGTTTAT      | GATTGATGT  | TCAA             |
| Consensus (22245)                               | CTT                   | TG                    | TG                 | GG                 | C              | TCT          | TGG           | T                | GA         | C                |
|                                                 |                       |                       |                    |                    |                |              |               |                  |            | Section 270      |
|                                                 | (22328)               | 22328                 | 22340              | 22350              | 22360          | 22370        | 22380         | 22390            | 22400      | 22410            |
| K12 Zwischenstück 255.328 - 290.948 (21936)     | GACCGCA               | TATCC                 | GCGTGC             | GGGGCGTGGT         | TCTCATTT       | TACCC        | TGCGCGAC      | AGCGAACA         | CC         | TGAGCGACGGTACGCC |
| SARS-CoV-2 Reference Genome NC_045512.2 (18785) | TTACAGG               | TAA                   | CGTACAAA           | GC                 | AAC            | ATGATCTGTAT  | TGTC          | CAAGTCCAT        | GTAAT      | GCACATGT         |
| Consensus (22328)                               | C                     | TA                    | CC                 | GC                 | C              | TG           | T             | T                | T          | T                |
|                                                 |                       |                       |                    |                    |                |              |               |                  |            | Section 271      |
|                                                 | (22411)               | 22411                 | 22420              | 22430              | 22440          | 22450        | 22460         | 22470            | 22480      | 22493            |
| K12 Zwischenstück 255.328 - 290.948 (22018)     | GACGTGGT              | TGCGTT                | CTGCGGGG           | TTATCCG            | CAGGTGGT       | GGCGCTAG     | GCA           | TTAACTG          | ---        | TATTGCGCTGGAA    |
| SARS-CoV-2 Reference Genome NC_045512.2 (18858) | TGCAATCA              | TGACTAG               | GTGTAGCT           | TGCCAG             | AGGTGCT        | TTGTTAAG     | CGTGT         | TTGACTG          | GAC        | TATTGAATATCCT    |
| Consensus (22411)                               | C                     | TG                    | T                  | G                  | TG             | C            | G             | T                | TCC        | C                |
|                                                 |                       |                       |                    |                    |                |              |               |                  |            | Section 272      |
|                                                 | (22494)               | 22494                 | 22500              | 22510              | 22520          | 22530        | 22540         | 22550            | 22560      | 22576            |
| K12 Zwischenstück 255.328 - 290.948 (22097)     | CTGCGT                | TGCA                  | GCATT              | TACA               | CGGTTT         | ---          | A--ACGGT      | GCTGCGCG         | TGGT       | GTTGTA           |
| SARS-CoV-2 Reference Genome NC_045512.2 (18941) | ATGAAC                | TGAAG                 | ATTAA              | TGCGG              | CTTGT          | AGAAAGGT     | TCAACACA      | TGGT             | TGTAA      | ---              |
| Consensus (22494)                               | TG                    | TG                    | AG                 | ATT                | A              | CGG          | TT            | A                | A          | GGT              |
|                                                 |                       |                       |                    |                    |                |              |               |                  |            | Section 273      |
|                                                 | (22577)               | 22577                 | 22590              | 22600              | 22610          | 22620        | 22630         | 22640            |            | 22659            |
| K12 Zwischenstück 255.328 - 290.948 (22176)     | GAGCAAA               | ACCTGGCA              | TCA                | TCACG              | GTGA           | ACATTG       | CGCG          | CAGCTGGCGG       | ATTATC     | TGCCGCAG         |
| SARS-CoV-2 Reference Genome NC_045512.2 (19011) | ---                   | CAAA                  | TTCCAGT            | TC                 | TCACG          | ---          | ACATTG        | GTAAC            | CCTAAAGCT  | ATTAG            |
| Consensus (22577)                               |                       | CAAA                  | C                  | TC                 | TCACG          |              | ACATTG        | C                |            |                  |



Sars-CoV-2 & E.coli K12 Zwischenstückeaapr.apr

|                                                 |         |                       |                       |                       |                       |                       |                       |                       |                       |                       |      |     |      |       |       |      |      |         |    |     |       |     |     |     |       |     |       |     |     |     |      |      |     |     |     |     |     |     |    |    |    |   |    |    |
|-------------------------------------------------|---------|-----------------------|-----------------------|-----------------------|-----------------------|-----------------------|-----------------------|-----------------------|-----------------------|-----------------------|------|-----|------|-------|-------|------|------|---------|----|-----|-------|-----|-----|-----|-------|-----|-------|-----|-----|-----|------|------|-----|-----|-----|-----|-----|-----|----|----|----|---|----|----|
|                                                 |         |                       |                       |                       |                       |                       |                       |                       |                       | Section 274           |      |     |      |       |       |      |      |         |    |     |       |     |     |     |       |     |       |     |     |     |      |      |     |     |     |     |     |     |    |    |    |   |    |    |
|                                                 | (22660) | <a href="#">22660</a> | <a href="#">22670</a> | <a href="#">22680</a> | <a href="#">22690</a> | <a href="#">22700</a> | <a href="#">22710</a> | <a href="#">22720</a> | <a href="#">22730</a> | <a href="#">22742</a> |      |     |      |       |       |      |      |         |    |     |       |     |     |     |       |     |       |     |     |     |      |      |     |     |     |     |     |     |    |    |    |   |    |    |
| K12 Zwischenstück 255.328 - 290.948 (22259)     | T       | GAT                   | TGGCGGGTGC            | TG                    | TC                    | GCAC                  | CAC                   | GCCT                  | GCGGAT                | TAT                   | C    | GCC | GC   | GTTAA | AA    | GCGC | GAAG | CTGAGGG | TT | TAT | TC    | GGG | TCT | AC  | AT    | CG  |       |     |     |     |      |      |     |     |     |     |     |     |    |    |    |   |    |    |
| SARS-CoV-2 Reference Genome NC_045512.2 (19085) | AG      | T                     | TCTA-----             | TG                    | AT                    | GCAC                  | A--                   | GCCT                  | TGTAG                 | T                     | G    | AAA | GC   | -TTA  | TAA   | AATA | GAAG | AA----- | TT | TAT | TC    | TAT | TCT | T-  | AT    | GC  |       |     |     |     |      |      |     |     |     |     |     |     |    |    |    |   |    |    |
| Consensus (22660)                               | G       | T                     |                       | TG                    |                       | GCAC                  |                       | GCCT                  |                       | T                     | C    | GC  | TTA  | AA    |       | GAAG |      |         | TT | TC  |       | TCT |     | AT  |       |     |       |     |     |     |      |      |     |     |     |     |     |     |    |    |    |   |    |    |
|                                                 |         |                       |                       |                       |                       |                       |                       |                       |                       | Section 275           |      |     |      |       |       |      |      |         |    |     |       |     |     |     |       |     |       |     |     |     |      |      |     |     |     |     |     |     |    |    |    |   |    |    |
|                                                 | (22743) | <a href="#">22743</a> | <a href="#">22750</a> | <a href="#">22760</a> | <a href="#">22770</a> | <a href="#">22780</a> | <a href="#">22790</a> | <a href="#">22800</a> | <a href="#">22810</a> | <a href="#">22825</a> |      |     |      |       |       |      |      |         |    |     |       |     |     |     |       |     |       |     |     |     |      |      |     |     |     |     |     |     |    |    |    |   |    |    |
| K12 Zwischenstück 255.328 - 290.948 (22342)     | TT      | CATT                  | TG                    | GC                    | CTG                   | AT                    | AAG                   | CG                    | C                     | AG                    | C    | AT  | CAG  | GG    | -     | ATT  | GCC  | GG      | AT | GC  | GGC   | CAC | AAG | CG  | CCT   | TAT | CCGG  | CCT | AC  | AAA | AC   | CACA |     |     |     |     |     |     |    |    |    |   |    |    |
| SARS-CoV-2 Reference Genome NC_045512.2 (19152) | CA      | CA                    | CAT                   | TCT                   | GAC                   | AA                    | AT                    | TC                    | AG                    | AT                    | GG   | TGT | AT   | GC    | CT    | ATT  | TTG  | GA      | AT | GC  | ----- | AA  | TGT | C   | GA    | TA  | GATAT | CCT | G   | CT  | AA   | TT   | C-- |     |     |     |     |     |    |    |    |   |    |    |
| Consensus (22743)                               | CA      |                       | T                     | G                     | C                     |                       | AT                    |                       | C                     | A                     | G    | T   | G    | C     | ATT   |      | G    | AT      | GC |     | AA    |     | C   | TA  |       | CCT | C     | AA  |     | C   |      |      |     |     |     |     |     |     |    |    |    |   |    |    |
|                                                 |         |                       |                       |                       |                       |                       |                       |                       |                       | Section 276           |      |     |      |       |       |      |      |         |    |     |       |     |     |     |       |     |       |     |     |     |      |      |     |     |     |     |     |     |    |    |    |   |    |    |
|                                                 | (22826) | <a href="#">22826</a> | <a href="#">22840</a> | <a href="#">22850</a> | <a href="#">22860</a> | <a href="#">22870</a> | <a href="#">22880</a> | <a href="#">22890</a> | <a href="#">22908</a> |                       |      |     |      |       |       |      |      |         |    |     |       |     |     |     |       |     |       |     |     |     |      |      |     |     |     |     |     |     |    |    |    |   |    |    |
| K12 Zwischenstück 255.328 - 290.948 (22424)     | AA      | AC                    | GTT                   | AT                    | TG                    | CC                    | G                     | CAT                   | CC                    | G                     | CA   | GA  | CA   | AA    | CA    | TGC  | CG   | TAC     | GG | AT  | TGG   | ATT | T   | CA  | AG    | TAA | TAC   | TG  | C   | TG  | CC   | GAC  | GT  | CC  | GGT | TG  | CAG |     |    |    |    |   |    |    |
| SARS-CoV-2 Reference Genome NC_045512.2 (19228) | -       | ATT                   | GTT                   | -                     | TG                    | TAG                   | -                     | AT                    | TT                    | G                     | ACA  | CT  | AG   | AG    | TGC   | TAT  | CT   | AA      | CT | -   | TA    | AC  | TT  | GC  | CT    | GG  | TT    | GG  | TG  | AG  | TT   | GC   | AG  | --- | TTT | GTA | TG  | TAA |    |    |    |   |    |    |
| Consensus (22826)                               | A       |                       | GTT                   |                       | TG                    |                       | G                     | AT                    |                       | G                     | CA   |     | A    | A     |       | T    | C    | AC      |    | T   |       | TT  | C   | G   | T     | T   | TG    | T   | GC  | G   |      | T    | G   | TG  | A   |     |     |     |    |    |    |   |    |    |
|                                                 |         |                       |                       |                       |                       |                       |                       |                       |                       | Section 277           |      |     |      |       |       |      |      |         |    |     |       |     |     |     |       |     |       |     |     |     |      |      |     |     |     |     |     |     |    |    |    |   |    |    |
|                                                 | (22909) | <a href="#">22909</a> | <a href="#">22920</a> | <a href="#">22930</a> | <a href="#">22940</a> | <a href="#">22950</a> | <a href="#">22960</a> | <a href="#">22970</a> | <a href="#">22980</a> | <a href="#">22991</a> |      |     |      |       |       |      |      |         |    |     |       |     |     |     |       |     |       |     |     |     |      |      |     |     |     |     |     |     |    |    |    |   |    |    |
| K12 Zwischenstück 255.328 - 290.948 (22507)     | A       | CG                    | CGT                   | AG                    | CGT                   | TG                    | AC                    | TG                    | CA                    | TA                    | ATA  | TCT | CC   | TG    | CCC   | GT   | GC   | CA      | TT | CC  | AC    | CG  | T   | CA  | CT    | CA  | TAC   | TG  | CG  | CC  | CA   | TAT  | TAG | CG  | ACA | -   |     |     |    |    |    |   |    |    |
| SARS-CoV-2 Reference Genome NC_045512.2 (19304) | A       | TAA                   | ACA                   | TG                    | CA                    | TTC                   | G                     | ACA                   | CA                    | CC                    | AG   | CT  | TT   | TGA   | TAAAA | GT   | GC   | TT      | TT | GT  | ----  | TA  | AT  | TT  | AA    | ACA | AA    | TTA | CC  | ATT | TT   | T    | CT  | ATT | AC  | TC  |     |     |    |    |    |   |    |    |
| Consensus (22909)                               | A       |                       | A                     |                       | T                     | C                     |                       | CA                    |                       | A                     | T    | T   | T    |       | GTGC  |      | TT   |         |    |     |       | T   | A   | TT  | A     | AC  |       | CC  |     | T   | T    |      | AC  |     |     |     |     |     |    |    |    |   |    |    |
|                                                 |         |                       |                       |                       |                       |                       |                       |                       |                       | Section 278           |      |     |      |       |       |      |      |         |    |     |       |     |     |     |       |     |       |     |     |     |      |      |     |     |     |     |     |     |    |    |    |   |    |    |
|                                                 | (22992) | <a href="#">22992</a> | <a href="#">23000</a> | <a href="#">23010</a> | <a href="#">23020</a> | <a href="#">23030</a> | <a href="#">23040</a> | <a href="#">23050</a> | <a href="#">23060</a> | <a href="#">23074</a> |      |     |      |       |       |      |      |         |    |     |       |     |     |     |       |     |       |     |     |     |      |      |     |     |     |     |     |     |    |    |    |   |    |    |
| K12 Zwischenstück 255.328 - 290.948 (22589)     | TG      | G                     | CG                    | GAT                   | CA                    | CG                    | CAG                   | CGC                   | TG                    | GC                    | TCTC | T   | TG   | CCG   | -     | GA   | TG   | CG      | TG | AGC | GT    | GAT | CG  | CT  | CC    | G   | GG    | CG  | CAC | ACC | GACC | AT   | CC  | CT  | T   | CAC |     |     |    |    |    |   |    |    |
| SARS-CoV-2 Reference Genome NC_045512.2 (19383) | TG      | AC                    | AG                    | T                     | CA                    | TG                    | -----                 | TG                    | AG                    | TCTC                  | AT   | GG  | AAAA | CA    | AG    | TAG  | TG   | TC      | AG | AT  | AG    | ATT | AT  | GT  | ----- | ACC | ACTA  | AA  | AGT | CT  | G    | CTA  |     |     |     |     |     |     |    |    |    |   |    |    |
| Consensus (22992)                               | TG      | C                     | G                     |                       | CA                    | G                     |                       |                       | TG                    |                       | TCTC | T   | G    |       | C     | A    |      | TG      |    | G   | AT    | G   | TT  | G   |       |     | ACC   |     | A   |     | CT   | C    |     |     |     |     |     |     |    |    |    |   |    |    |
|                                                 |         |                       |                       |                       |                       |                       |                       |                       |                       | Section 279           |      |     |      |       |       |      |      |         |    |     |       |     |     |     |       |     |       |     |     |     |      |      |     |     |     |     |     |     |    |    |    |   |    |    |
|                                                 | (23075) | <a href="#">23075</a> | <a href="#">23080</a> | <a href="#">23090</a> | <a href="#">23100</a> | <a href="#">23110</a> | <a href="#">23120</a> | <a href="#">23130</a> | <a href="#">23140</a> | <a href="#">23157</a> |      |     |      |       |       |      |      |         |    |     |       |     |     |     |       |     |       |     |     |     |      |      |     |     |     |     |     |     |    |    |    |   |    |    |
| K12 Zwischenstück 255.328 - 290.948 (22671)     | CC      | TGT                   | G                     | TAC                   | CA                    | AA                    | AG                    | TG                    | CA                    | G                     | CG   | GG  | C    | GG    | CAG   | TG   | AT   | AG      | CC | GT  | AG    | AT  | CA  | AC  | GT    | TCC | GT    | CG  | TG  | AG  | GT   | TG   | CC  | GGG | AA  | CAG | G   |     |    |    |    |   |    |    |
| SARS-CoV-2 Reference Genome NC_045512.2 (19454) | CG      | TGT                   | TA                    | CA                    | CG                    | TG                    | CA                    | ATTT                  | AG                    | TGG                   | ---- | TG  | CT   | TG    | CT    | GT   | AG   | CA      | TC | AT  | CA    | TG  | CA  | TA  | ----  | TG  | AG    | TAC | AG  | ATT | GT   | ---- | AT  | CT  | CG  |     |     |     |    |    |    |   |    |    |
| Consensus (23075)                               | C       | TGT                   | TA                    | CA                    |                       | TGCA                  |                       |                       | G                     | GG                    |      | TG  | T    | C     | GT    | AG   | ATCA |         | TA |     | T     | T   | AG  | TTG |       |     | A     | C   | G   |     |      |      |     |     |     |     |     |     |    |    |    |   |    |    |
|                                                 |         |                       |                       |                       |                       |                       |                       |                       |                       | Section 280           |      |     |      |       |       |      |      |         |    |     |       |     |     |     |       |     |       |     |     |     |      |      |     |     |     |     |     |     |    |    |    |   |    |    |
|                                                 | (23158) | <a href="#">23158</a> | <a href="#">23170</a> | <a href="#">23180</a> | <a href="#">23190</a> | <a href="#">23200</a> | <a href="#">23210</a> | <a href="#">23220</a> | <a href="#">23230</a> | <a href="#">23240</a> |      |     |      |       |       |      |      |         |    |     |       |     |     |     |       |     |       |     |     |     |      |      |     |     |     |     |     |     |    |    |    |   |    |    |
| K12 Zwischenstück 255.328 - 290.948 (22754)     | T       | TG                    | G                     | CA                    | T                     | CG                    | CC                    | CAT                   | AA                    | AG                    | CT   | CG  | C    | ATA   | AA    | AG   | CG   | GG      | AG | CG  | G     | GC  | TG  | GC  | GGT   | AA  | AG    | AT  | C   | TG  | CG   | TG   | AG  | CG  | GAT | CT  | G   | CAT | GA | TG | TG |   |    |    |
| SARS-CoV-2 Reference Genome NC_045512.2 (19526) | A       | TG                    | -                     | CT                    | T                     | A                     | TAA                   | CAT                   | GA                    | TG                    | AT   | CT  | C    | ----- | AG    | CT   | GG   | CT      | TT | AG  | CT    | TG  | TG  | GGT | TT    | CA  | AA    | C   | AA  | TT  | -    | TG   | A   | T   | AC  | TT  | A   | AA  | C  | CT | C  | - | TG | GA |
| Consensus (23158)                               |         | TG                    | C                     | T                     |                       |                       |                       | CAT                   | A                     | G                     | TC   | C   |      |       | AGC   | GG   |      | G       | TG |     | GGT   | A   | A   | C   |       |     | TGA   |     | C   |     |      |      |     |     |     | C   | T   |     | TG |    |    |   |    |    |



Sars-CoV-2 & E.coli K12 Zwischenstückapr.apr

|                                                 |                |            |           |             |            |             |           |          |          |             |
|-------------------------------------------------|----------------|------------|-----------|-------------|------------|-------------|-----------|----------|----------|-------------|
|                                                 |                |            |           |             |            |             |           |          |          | Section 281 |
| (23241)                                         | 23241          | 23250      | 23260     | 23270       | 23280      | 23290       | 23300     | 23310    | 23323    |             |
| K12 Zwischenstück 255.328 - 290.948 (22837)     | TCCCTTGTTCA    | TCAGCAG    | CACAGTAT  | CAGAAACCG   | CAAAAGGCTT | CGCTCTGAT   | TCGTGGGTG | ACGTACAG | CGAGGTG  | ATATCA      |
| SARS-CoV-2 Reference Genome NC_045512.2 (19601) | ACACTTTTACAGAC | TT-CAGAGT  | TT-AGAAAT | GT---GGCTT  | T--TAATGT  | TGTAAAT     | TAAGGAC   | ACTTTG   | ATGGA    | ACAACA      |
| Consensus (23241)                               | CCTTTCACAC     | CAAGT      | TAGAA     | G           | GGCTT      | T           | TGT       | TAGACA   | GTGA     | ACA         |
|                                                 |                |            |           |             |            |             |           |          |          | Section 282 |
| (23324)                                         | 23324          | 23330      | 23340     | 23350       | 23360      | 23370       | 23380     | 23390    | 23406    |             |
| K12 Zwischenstück 255.328 - 290.948 (22919)     | AACFGCTT       | TGCACT     | TCGCGGATC | TGTTCGCGCAT | GTGCGACGC  | AGGT---TGGC | GTGAGGT   | TTACTCA  | ACGGCTC  | ATCAA       |
| SARS-CoV-2 Reference Genome NC_045512.2 (19677) | GGGTGAAGTAC    | CAGTTCT    | TATCATTA  | ATAACAC     | TGTTTAC    | ACAAAGTTGA  | TGGTGTGAT | GTAGA    | ATTGTTT  | GAAAATAAA   |
| Consensus (23324)                               | TG             | TCA        | T         | T           | CC         | TG          | T         | AC       | A        | GT          |
|                                                 |                |            |           |             |            |             |           |          |          | Section 283 |
| (23407)                                         | 23407          | 23420      | 23430     | 23440       | 23450      | 23460       | 23470     | 23489    |          |             |
| K12 Zwischenstück 255.328 - 290.948 (22998)     | ACAGCAGCACT    | TCGGCTTG   | AGGATCA   | GCGCGGGC    | ---AGCGC   | CACGCGCTG   | CTGCTGCC  | CGGGAG   | ATCTG    | ATCGACAA    |
| SARS-CoV-2 Reference Genome NC_045512.2 (19759) | ACAACA         | TTACCTG    | TAAAGT    | AGCATTT     | GAGCTTT    | GGGCTA      | AGCGCAC   | ATTAAAC  | CAGTACC  | GAGGTGA     |
| Consensus (23407)                               | ACA            | CA         | AC        | T           | T          | AG          | AT        | G        | GC       | GG          |
|                                                 |                |            |           |             |            |             |           |          |          | Section 284 |
| (23490)                                         | 23490          | 23500      | 23510     | 23520       | 23530      | 23540       | 23550     | 23560    | 23572    |             |
| K12 Zwischenstück 255.328 - 290.948 (23079)     | AGCGGTCT       | TCGA       | ATCCTTCC  | CAGATCCAC   | CATCGC     | CAACGCCT    | CTTGAC    | CGCGGG   | CTTCA    | GCTCTG      |
| SARS-CoV-2 Reference Genome NC_045512.2 (19842) | TTTGGGTGTG     | GGA        | -----     | CATTCG      | TGCTAATA   | CTGTGA      | TCTGGGAC  | TACAAAA  | -----    | GAGTGTCC    |
| Consensus (23490)                               | GG             | TGA        |           | CAT         | GC         | CT          | TGA       | GGG      | TCA      | G           |
|                                                 |                |            |           |             |            |             |           |          |          | Section 285 |
| (23573)                                         | 23573          | 23580      | 23590     | 23600       | 23610      | 23620       | 23630     | 23640    | 23655    |             |
| K12 Zwischenstück 255.328 - 290.948 (23162)     | ATTTTC         | AGGCCA     | TACCGACA  | TTCT-CT     | CCCAGC     | GACATATG    | CGGGA     | --CAGGGC | ATAGGA   | CTGAAA      |
| SARS-CoV-2 Reference Genome NC_045512.2 (19902) | ACATATA        | TCTAC      | TATTGG    | TGTGTTGTT   | CTATGACT   | GACATAGC    | CAAGAAAC  | CAACTGA  | AAACGAT  | TTGTGC      |
| Consensus (23573)                               | A              | T          | A         | TA          | G          | TT          | T         | CT       | A        | GACATA      |
|                                                 |                |            |           |             |            |             |           |          |          | Section 286 |
| (23656)                                         | 23656          | 23670      | 23680     | 23690       | 23700      | 23710       | 23720     | 23738    |          |             |
| K12 Zwischenstück 255.328 - 290.948 (23242)     | GCGCTGCT       | TGAA       | TAGAG     | CGATGG      | GGTGA      | CGTCTT      | GCCATCA   | ATGAAA   | ATTG     | CCCC        |
| SARS-CoV-2 Reference Genome NC_045512.2 (19985) | TTTTTGA        | TG         | TAGAG     | TTGATGGT    | CAAGT      | AGACTT      | ATTA      | ---GAAA  | ---TGCCC | GTAATGGT    |
| Consensus (23656)                               | TG             | TG         | TAGAG     | GGT         | A          | GT          | C         | T        | A        | GAAA        |
|                                                 |                |            |           |             |            |             |           |          |          | Section 287 |
| (23739)                                         | 23739          | 23750      | 23760     | 23770       | 23780      | 23790       | 23800     | 23810    | 23821    |             |
| K12 Zwischenstück 255.328 - 290.948 (23325)     | GGCGCAAA       | ATAGTGGTTT | TGCCG     | CAGCG       | CGGACGGG   | CCGAGCA     | GC--GTC   | ACCATT   | TTGCC    | CCTGCGGGA   |
| SARS-CoV-2 Reference Genome NC_045512.2 (20060) | GTGTTAAA       | -----      | GGTTT     | ACAAC       | CATG       | TGTAAGT     | CCAA      | CAAGC    | TA       | GTC         |
| Consensus (23739)                               | G              | AAA        | GGTTT     | CA          | C          | G           | A         | G        | CC       | A           |

Sars-CoV-2 & E.coli K12 Zwischenstückeapr.apr

|                                                 |       |       |           |          |        |         |        |        |           |                         |
|-------------------------------------------------|-------|-------|-----------|----------|--------|---------|--------|--------|-----------|-------------------------|
|                                                 |       |       |           |          |        |         |        |        |           | Section 288             |
| (23822)                                         | 23822 | 23830 | 23840     | 23850    | 23860  | 23870   | 23880  | 23890  | 23904     |                         |
| K12 Zwischenstück 255.328 - 290.948 (23404)     | ATTGT | CATT  | ACCGTATTA | CTGCCAA  | ATCGTT | TAGTGAC | GTTCG  | CAGTT  | CAACGAAAT | TTTTCTGAGTCATAGTGCGCTCC |
| SARS-CoV-2 Reference Genome NC_045512.2 (20138) | AAACA | CAGTT | CAATTATTA | TAAGAA   | GTGATG | GTGTT   | GTCCAA | CAATT  | ACCTGAAAC | TTACTTTACTCAGAGT        |
| Consensus (23822)                               | A     | C     | TT        | TATTA    | AA     | T       | G      | T      | GTG       | GT                      |
|                                                 |       |       |           |          |        |         |        |        |           | Section 289             |
| (23905)                                         | 23905 | 23910 | 23920     | 23930    | 23940  | 23950   | 23960  | 23970  | 23987     |                         |
| K12 Zwischenstück 255.328 - 290.948 (23487)     | T     | TACG  | CCT       | GGT      | TTT    | TGG     | CTTT   | GAA    | CGGGA     | GGTACG                  |
| SARS-CoV-2 Reference Genome NC_045512.2 (20216) | ATTTA | CAAG  | AAATTT    | AAAC     | CCAG   | GAGT    | CAAA   | TGG    | AAAT      | TGATT                   |
| Consensus (23905)                               | T     | C     | G         | TTT      | C      | GA      | C      | GG     | A         | TGATT                   |
|                                                 |       |       |           |          |        |         |        |        |           | Section 290             |
| (23988)                                         | 23988 | 24000 | 24010     | 24020    | 24030  | 24040   | 24050  | 24060  | 24070     |                         |
| K12 Zwischenstück 255.328 - 290.948 (23569)     | ACCAC | GATC  | GAAATG    | GAAC     | CGTA   | GGCA    | ATCGC  | TACCCG | TATTT     | CGCAT                   |
| SARS-CoV-2 Reference Genome NC_045512.2 (20297) | AATTA | GAGG  | CTATG     | CCTT     | CGAA   | CATA    | ATCGTT | TATGGA | GATTT     | TAGT                    |
| Consensus (23988)                               | A     | GA    | ATG       | CG       | A      | A       | TA     | G      | T         | TT                      |
|                                                 |       |       |           |          |        |         |        |        |           | Section 291             |
| (24071)                                         | 24071 | 24080 | 24090     | 24100    | 24110  | 24120   | 24130  | 24140  | 24153     |                         |
| K12 Zwischenstück 255.328 - 290.948 (23651)     | C     | GC    | GGT       | ATC      | CG     | GCGT    | GAC    | GAGGA  | AC        | ACAA                    |
| SARS-CoV-2 Reference Genome NC_045512.2 (20380) | CTAG  | C     | TAAA      | CGTTT    | TA     | GGA     | ATC    | AC     | CTTT      | TGAATTA                 |
| Consensus (24071)                               | C     | G     | TA        | CG       | T      | A       | GA     | AC     | TG        | GA                      |
|                                                 |       |       |           |          |        |         |        |        |           | Section 292             |
| (24154)                                         | 24154 | 24160 | 24170     | 24180    | 24190  | 24200   | 24210  | 24220  | 24236     |                         |
| K12 Zwischenstück 255.328 - 290.948 (23734)     | ATCG  | CCGG  | GCGCA     | G        | CAG    | CGG     | CAGG   | --     | AGGA      | TGTG                    |
| SARS-CoV-2 Reference Genome NC_045512.2 (20458) | ATAA  | CAGAT | GCGCA     | AA       | CAG    | GTT     | CATC   | TA     | AGTG      | TGTGT                   |
| Consensus (24154)                               | AT    | C     | G         | GCGCA    | CAG    | CA      | C      | AG     | TGTG      | GT                      |
|                                                 |       |       |           |          |        |         |        |        |           | Section 293             |
| (24237)                                         | 24237 | 24250 | 24260     | 24270    | 24280  | 24290   | 24300  | 24319  |           |                         |
| K12 Zwischenstück 255.328 - 290.948 (23812)     | -     | TC    | GAGC      | GATTTATC | GAT    | TTGGC   | CGG    | TAA    | TG        | ACTC                    |
| SARS-CoV-2 Reference Genome NC_045512.2 (20541) | A     | TC    | CCAA      | GATTTATC | TG     | TAGTTT  | C      | ---    | TAA       | GGTTGT                  |
| Consensus (24237)                               |       | TC    |           | GATTTATC | T      |         | C      | TAA    | G         | CAA                     |
|                                                 |       |       |           |          |        |         |        |        |           | Section 294             |
| (24320)                                         | 24320 | 24330 | 24340     | 24350    | 24360  | 24370   | 24380  | 24390  | 24402     |                         |
| K12 Zwischenstück 255.328 - 290.948 (23894)     | TCA   | TGCT  | GC        | TCCA     | CGAT   | TT      | TG     | AGAA   | CGA       | CAGCGA                  |
| SARS-CoV-2 Reference Genome NC_045512.2 (20616) | GTG   | TAAAG | ATGGC     | --       | ATGT   | --      | AGAA   | AC     | ATTTTAC   | GCAAAA                  |
| Consensus (24320)                               |       | T     | G         | T        | C      | AT      | T      | AGAA   | A         | C                       |

Sars-CoV-2 & E.coli K12 Zwischenstück.epr.apr

|                                                 |                |            |              |               |             |             |               |            |               |             |        |        |         |       |       |       |
|-------------------------------------------------|----------------|------------|--------------|---------------|-------------|-------------|---------------|------------|---------------|-------------|--------|--------|---------|-------|-------|-------|
|                                                 |                |            |              |               |             |             |               |            |               | Section 295 |        |        |         |       |       |       |
| (24403)                                         | 24403          | 24410      | 24420        | 24430         | 24440       | 24450       | 24460         | 24470      | 24485         |             |        |        |         |       |       |       |
| K12 Zwischenstück 255.328 - 290.948 (23977)     | ---            | CTCAATTCGC | TGCGTATATC   | GCTTGCTGATTAC | GTGCAGCTTTC | CC--TTCA    | GGCGGGATTCAT  | ACAGCGG    | CCA--GCCA     |             |        |        |         |       |       |       |
| SARS-CoV-2 Reference Genome NC_045512.2 (20695) | AAT            | CTTTACAAAA | TGCAAGAAAT   | GCTATTAGAAA   | GTGTGACCTTC | AAAA        | TTATGGTGATAGT | GCAACA     | TTACCTAAAGGCA |             |        |        |         |       |       |       |
| Consensus (24403)                               |                | CT A       | TGC A A      | GCT GA A      | GTG C TTC   | TT          | GG G A T      | ACA        | C A G CA      |             |        |        |         |       |       |       |
|                                                 |                |            |              |               |             |             |               |            |               | Section 296 |        |        |         |       |       |       |
| (24486)                                         | 24486          | 24500      | 24510        | 24520         | 24530       | 24540       | 24550         | 24568      |               |             |        |        |         |       |       |       |
| K12 Zwischenstück 255.328 - 290.948 (24053)     | TCCG           | TCAATCCAT  | TCAACCGT     | CAAGGGTGA     | CAGCAGGC    | TCA         | TAGACGCC      | CAGCGTCG   | CCATAGTGC     | GTT         | CACCG  | AATAC  |         |       |       |       |
| SARS-CoV-2 Reference Genome NC_045512.2 (20777) | TAA            | TGATGAAT   | TGCGCAAA     | TATACT        | CAACTGTG    | TCAAT       | ATTTAAAC      | CACAT      | TAA           | CAT         | TAG    | CTGTAC | CCTAT   | AATA  | T     |       |
| Consensus (24486)                               | T              | T AT       | AT TC C A    | T A           | CA C G      | TCA A       | C A           | T C        | TAG           | C           |        | AATA   |         |       |       |       |
|                                                 |                |            |              |               |             |             |               |            |               | Section 297 |        |        |         |       |       |       |
| (24569)                                         | 24569          | 24580      | 24590        | 24600         | 24610       | 24620       | 24630         | 24640      | 24651         |             |        |        |         |       |       |       |
| K12 Zwischenstück 255.328 - 290.948 (24136)     | GTGCGCAACA     | ACCGTCTT   | CGGAGCCTG    | TCAATACCG     | CTAAAAC     | AGCCAGC     | GCTGGCGCA     | TTTAGCC    | CCGAC         | GTAT        | CCCA   |        |         |       |       |       |
| SARS-CoV-2 Reference Genome NC_045512.2 (20853) | GAGAGTTATACA   | TTTGGTGGT  | CTGATAA      | AGGAGT        | TGCAC       | AGGTACA     | GCTGT         | TTTAA      | GACAG         | GTGT        | CC     | TAC    |         |       |       |       |
| Consensus (24569)                               | G G G A A A    | T T C G    | CTG A A      | G GT AC AG    | A GCTG      | TTTA        | C G           | GT CC      |               |             |        |        |         |       |       |       |
|                                                 |                |            |              |               |             |             |               |            |               | Section 298 |        |        |         |       |       |       |
| (24652)                                         | 24652          | 24660      | 24670        | 24680         | 24690       | 24700       | 24710         | 24720      | 24734         |             |        |        |         |       |       |       |
| K12 Zwischenstück 255.328 - 290.948 (24217)     | CTGTTCG        | TCAATTC    | CGCGCAGAC    | CGATGACGT     | CAC         | TGCCCG      | CTGTATGC      | GCGAGG     | TTACCGAC      | TGCGGCC     | TGAGTT | TTT    | TTTA    |       |       |       |
| SARS-CoV-2 Reference Genome NC_045512.2 (20931) | GGGTACGCT      | GTGTGTC    | GATTGAGAT    | CAGATCTTA     | ATGACTT     | TGTCT       | CTGATGC       | AGTT       | CAACTTT       | TGATTGG     | TGA    | TTG    | TGC     | A     |       |       |
| Consensus (24652)                               | GT CG T C T TC |            | CAGA T A G C | TG C          | CTG ATGC    | AG TT       | TG            | TGA TT T A |               |             |        |        |         |       |       |       |
|                                                 |                |            |              |               |             |             |               |            |               | Section 299 |        |        |         |       |       |       |
| (24735)                                         | 24735          | 24740      | 24750        | 24760         | 24770       | 24780       | 24790         | 24800      | 24817         |             |        |        |         |       |       |       |
| K12 Zwischenstück 255.328 - 290.948 (24299)     | AATG           | GCGGAAT    | CGTGTG       | AGGCCAAG      | CGCCAT      | AATGCG      | GGCGG         | TGCTCGG    | CATCCA        | ACGCC       | ATTCAT | TGGC   | ATATC   | AA-T  |       |       |
| SARS-CoV-2 Reference Genome NC_045512.2 (21007) | ACTGTACAT      | ACAGCTAAT  | AAATGGGAT    | CTC--         | ATTAT       | TAGTGATAT   | TGACGAC       | CCTAAG     | ACTAA         | AAATGT      | TACAA  | AAAGAA | AAAT    |       |       |       |
| Consensus (24735)                               | A TG           | A A C      | T A G        | A C C         | AT AT       | G G         | T C           | C T        | AC A          | T C A A     | AA T   |        |         |       |       |       |
|                                                 |                |            |              |               |             |             |               |            |               | Section 300 |        |        |         |       |       |       |
| (24818)                                         | 24818          | 24830      | 24840        | 24850         | 24860       | 24870       | 24880         | 24890      | 24900         |             |        |        |         |       |       |       |
| K12 Zwischenstück 255.328 - 290.948 (24381)     | GATTTT         | CTGTG      | GTGCGT       | AC--          | CGGGTGA     | GAAGCGGT    | GTAA          | GTGAAC     | TGCAGT        | TGCTAT      | GTTT   | ACGG   | CAGTG   | AGAGC | AGAGA |       |
| SARS-CoV-2 Reference Genome NC_045512.2 (21088) | GACTCT         | TAAAG      | AGGT         | TTTTT         | CACTT       | ACATTT      | GTGGGT        | TATAC      | AACAAA        | AGCTAGC     | TCTT   | GGAG   | TTCC    | GTG   | GCTAT | AAAGA |
| Consensus (24818)                               | GA T T         | G G GT     | C T A        | G GG T A      | AAC         | AG T C T TT | A G C         | GTG        | A AGA         |             |        |        |         |       |       |       |
|                                                 |                |            |              |               |             |             |               |            |               | Section 301 |        |        |         |       |       |       |
| (24901)                                         | 24901          | 24910      | 24920        | 24930         | 24940       | 24950       | 24960         | 24970      | 24983         |             |        |        |         |       |       |       |
| K12 Zwischenstück 255.328 - 290.948 (24460)     | TAG            | CGCTGATG   | TCGCG        | CAGTGCT       | TTTGC       | CGTTA       | CGCAC         | ACCC       | CGTCAG        | TAGCT       | GAA    | CAGGAG | GGACAGC | TGA   | TAGAA | ACAGA |
| SARS-CoV-2 Reference Genome NC_045512.2 (21170) | TAAC           | GAGAACAT   | TC           | TGGAATGCT     | GAT--       | GTTA        | TA--          | AGCT       | CATGG         | GACACT      | TCG    | CATGGT | GGACAGC | CTT   | T-GTT | ACTAA |
| Consensus (24901)                               | TA C           | TC G A     | TGCT T C     | TTA           | A C C T     | G CT        | CA G          | GGACAGC    | T G           | AC A        |        |        |         |       |       |       |

Sars-CoV-2 & E.coli K12 Zwischenstückapr.apr

|                                         |         |             |         |         |           |           |           |            |          |                    |               |       |       |       |       |     |      |        |        |       |       |       |        |       |    |     |     |    |    |   |    |    |   |
|-----------------------------------------|---------|-------------|---------|---------|-----------|-----------|-----------|------------|----------|--------------------|---------------|-------|-------|-------|-------|-----|------|--------|--------|-------|-------|-------|--------|-------|----|-----|-----|----|----|---|----|----|---|
|                                         |         | Section 302 |         |         |           |           |           |            |          |                    |               |       |       |       |       |     |      |        |        |       |       |       |        |       |    |     |     |    |    |   |    |    |   |
|                                         | (24984) | 24984       | 24990   | 25000   | 25010     | 25020     | 25030     | 25040      | 25050    | 25066              |               |       |       |       |       |     |      |        |        |       |       |       |        |       |    |     |     |    |    |   |    |    |   |
| K12 Zwischenstück 255.328 - 290.948     | (24543) | AGCCAC      | TGGAGCA | CTCAAA  | AAACACCAT | CATACACT  | AAATCAGTA | AGTTGGCAGC | ATCACCGA | GAACACAAATGGGCTAAT | T             |       |       |       |       |     |      |        |        |       |       |       |        |       |    |     |     |    |    |   |    |    |   |
| SARS-CoV-2 Reference Genome NC_045512.2 | (21246) | TGTGAATG    | CGTCAT  | CTCTGAA | GCAATTTT  | TAATTGGA  | TGTAATTA  | TC TTGGCA  | --AACCA  | CGCGAACA           | AATAGATGGTTAT | T     |       |       |       |     |      |        |        |       |       |       |        |       |    |     |     |    |    |   |    |    |   |
| Consensus                               | (24984) | G           | A       | TG      | CA        | C         | TC        | AA         | CA       | T                  | A             | A     | A     | T     | A     | T   | A    | T      | A      | T     | A     | T     |        |       |    |     |     |    |    |   |    |    |   |
|                                         |         | Section 303 |         |         |           |           |           |            |          |                    |               |       |       |       |       |     |      |        |        |       |       |       |        |       |    |     |     |    |    |   |    |    |   |
|                                         | (25067) | 25067       | 25080   | 25090   | 25100     | 25110     | 25120     | 25130      | 25149    |                    |               |       |       |       |       |     |      |        |        |       |       |       |        |       |    |     |     |    |    |   |    |    |   |
| K12 Zwischenstück 255.328 - 290.948     | (24625) | CGGCAG      | TACTTTC | CCTAAA  | AGACATGT  | CTTGCCCA  | ATATAC    | TCAACATGA  | ACTAGATC | TGGTTGCTGC         | TCAGCTAAACA   | ACAG  |       |       |       |     |      |        |        |       |       |       |        |       |    |     |     |    |    |   |    |    |   |
| SARS-CoV-2 Reference Genome NC_045512.2 | (21325) | -GTCA-TG    | CATGC   | ---AAA  | TTACATA   | TTTGGAGGA | -ATAAC    | ---AATCC   | AATTCAGT | TGTCTT             | CCTATTCTTT    | ACAT  |       |       |       |     |      |        |        |       |       |       |        |       |    |     |     |    |    |   |    |    |   |
| Consensus                               | (25067) | G           | CA      | T       | C         | T         | C         | AAA        | ACAT     | T                  | TTG           | A     | ATAC  | A     | AT    | A   | T    | A      | TG     | T     | C     | T     | TA     | ACA   |    |     |     |    |    |   |    |    |   |
|                                         |         | Section 304 |         |         |           |           |           |            |          |                    |               |       |       |       |       |     |      |        |        |       |       |       |        |       |    |     |     |    |    |   |    |    |   |
|                                         | (25150) | 25150       | 25160   | 25170   | 25180     | 25190     | 25200     | 25210      | 25220    | 25232              |               |       |       |       |       |     |      |        |        |       |       |       |        |       |    |     |     |    |    |   |    |    |   |
| K12 Zwischenstück 255.328 - 290.948     | (24708) | ACCGA       | GAAAGA  | CACTGA  | AGTTCA    | AAACAC    | CGAAAG    | GAGAT      | AAT      | TGA                | AA            | GGG   | GTGT  | TGCAT | TGAC  | GAT | TGA  | AT     | TACAG  | CAGC  |       |       |        |       |    |     |     |    |    |   |    |    |   |
| SARS-CoV-2 Reference Genome NC_045512.2 | (21399) | GAGTAA      | ATTTCC  | CTTAA   | TTAAGGGG  | TAC       | TGCTG     | TTAT       | GTC      | TTTAA              | AG            | GAAG  | GTCA  | AA    | TCAAT | GAT | TGA  | TT     | TATCT  | CTTC  |       |       |        |       |    |     |     |    |    |   |    |    |   |
| Consensus                               | (25150) | A           | A       | C       | CT        | AA        | TT        | A          | C        | G                  | AT            | T     | AA    | G     | G     | T   | A    | T      | A      | GAT   | TGA   | T     | TA     | C     | C  |     |     |    |    |   |    |    |   |
|                                         |         | Section 305 |         |         |           |           |           |            |          |                    |               |       |       |       |       |     |      |        |        |       |       |       |        |       |    |     |     |    |    |   |    |    |   |
|                                         | (25233) | 25233       | 25240   | 25250   | 25260     | 25270     | 25280     | 25290      | 25300    | 25315              |               |       |       |       |       |     |      |        |        |       |       |       |        |       |    |     |     |    |    |   |    |    |   |
| K12 Zwischenstück 255.328 - 290.948     | (24790) | TTTTTT      | TTAATAT | GTCCCG  | TTTCG     | TCGGT     | AA        | CCCG       | TTTC     | AGCTCT             | TTCT          | TGGAG | ACGG  | CGGA  | TCTCG | CC  | TGAG | CA     | TCTGAC | TGTT  |       |       |        |       |    |     |     |    |    |   |    |    |   |
| SARS-CoV-2 Reference Genome NC_045512.2 | (21482) | TTAGTAA     | AGGTAG  | ACTTA   | TAA       | TAGAG     | AA        | AA         | CAACAG   | AGTT               | GTTATT        | T     | ----- | ----- | TCTAG | --- | TGA  | TGT    | TCT    | ---   | TGTT  |       |        |       |    |     |     |    |    |   |    |    |   |
| Consensus                               | (25233) | TT          | T       | A       | G         | C         | T         | T          | G        | AA                 | C             | AG    | T     | TT    | T     |     | TCT  | G      | TGA    | TCT   |       | TGTT  |        |       |    |     |     |    |    |   |    |    |   |
|                                         |         | Section 306 |         |         |           |           |           |            |          |                    |               |       |       |       |       |     |      |        |        |       |       |       |        |       |    |     |     |    |    |   |    |    |   |
|                                         | (25316) | 25316       | 25330   | 25340   | 25350     | 25360     | 25370     | 25380      | 25398    |                    |               |       |       |       |       |     |      |        |        |       |       |       |        |       |    |     |     |    |    |   |    |    |   |
| K12 Zwischenstück 255.328 - 290.948     | (24873) | CTTTAT      | TAGTG   | GAA     | AATCCG    | GACC      | GTAC      | TTCTT      | TATCCAG  | GC                 | ATAA          | AGG   | CTGT  | G     | GGTG  | GTG | AT   | TCG    | AGACG  | TGTTG | CAAC  |       |        |       |    |     |     |    |    |   |    |    |   |
| SARS-CoV-2 Reference Genome NC_045512.2 | (21547) | AACAAC      | TAAAC   | GAA     | CAAT      | ---       | GTTT      | GT         | TTCTT    | GT                 | TTATT         | GC    | CACT  | AGT   | CTCT  | AGT | TCAG | TG     | TAA    | ---   | TCTTA | CAAC  |        |       |    |     |     |    |    |   |    |    |   |
| Consensus                               | (25316) | A           | TA      | GAA     | AAT       | G         | GT        | TTCTT      | T        | T                  | GC            | AG    | CT    | T     | G     | GTG | T    | T      | A      |       | T     | TT    | CAAC   |       |    |     |     |    |    |   |    |    |   |
|                                         |         | Section 307 |         |         |           |           |           |            |          |                    |               |       |       |       |       |     |      |        |        |       |       |       |        |       |    |     |     |    |    |   |    |    |   |
|                                         | (25399) | 25399       | 25410   | 25420   | 25430     | 25440     | 25450     | 25460      | 25470    | 25481              |               |       |       |       |       |     |      |        |        |       |       |       |        |       |    |     |     |    |    |   |    |    |   |
| K12 Zwischenstück 255.328 - 290.948     | (24955) | GCTGG       | CAACA   | AGA     | ATAA      | CCGAG     | ATCA      | ACAA       | CC       | TGTTT              | GAC           | TGCT  | TCA   | GTTT  | TAA   | AC  | CT   | TCGG   | GATA   | ACGC  | TTAC  | CGCTC | ATGG   |       |    |     |     |    |    |   |    |    |   |
| SARS-CoV-2 Reference Genome NC_045512.2 | (21622) | CAGAA       | CTCA    | ATT     | ACCC      | CC        | TGC       | ATAC       | AC       | TAA                | TCTTT         | CAC   | ACG   | TGGT  | GTTT  | ATT | AC   | CT     | ---    | GACAA | AGT   | TTT   | CAGATC | ---   |    |     |     |    |    |   |    |    |   |
| Consensus                               | (25399) | C           | A       | A       | CC        | AT        | AC        | A          | T        | TTT                | AC            | T     | GTTT  | AC    | CT    | GA  | AA   | G      | TT     | C     | G     | TC    |        |       |    |     |     |    |    |   |    |    |   |
|                                         |         | Section 308 |         |         |           |           |           |            |          |                    |               |       |       |       |       |     |      |        |        |       |       |       |        |       |    |     |     |    |    |   |    |    |   |
|                                         | (25482) | 25482       | 25490   | 25500   | 25510     | 25520     | 25530     | 25540      | 25550    | 25564              |               |       |       |       |       |     |      |        |        |       |       |       |        |       |    |     |     |    |    |   |    |    |   |
| K12 Zwischenstück 255.328 - 290.948     | (25038) | GCAC        | CTC     | TC      | TTT       | AA        | GC        | CATT       | TT       | AA                 | TG            | ACTC  | GGA   | GG    | TGT   | CTG | T    | TAA    | ACC    | CG    | TGG   | CGAT  | TCAA   | AATTG | C  | GAT | TAT | AT | CA | T | AT | CC |   |
| SARS-CoV-2 Reference Genome NC_045512.2 | (21697) | ---         | CTC     | AG      | TTT       | TA        | ---       | CATT       | C        | AA                 | CTCA          | ---   | GGA   | CT    | TGT   | TCT | T    | ACCTTT | CTTT   | CCAAT | GTT   | ACT   | TTG    | G     | TT | TCC | ATG | C  | TA | T | AT | CA | C |
| Consensus                               | (25482) |             | CTC     |         | TTT       | A         |           | CATT       |          | AA                 | T             | A     |       | GGA   |       | TGT |      |        |        |       |       |       |        |       |    |     |     |    |    |   |    |    |   |

Sars-CoV-2 & E.coli K12 Zwischenstück.eapr.apr

|                                         |         |        |        |        |       |          |       |       |        |       |        |       |       |       |       |       |        |      |             |        |        |       |       |       |      |       |     |     |     |      |
|-----------------------------------------|---------|--------|--------|--------|-------|----------|-------|-------|--------|-------|--------|-------|-------|-------|-------|-------|--------|------|-------------|--------|--------|-------|-------|-------|------|-------|-----|-----|-----|------|
|                                         |         |        |        |        |       |          |       |       |        |       |        |       |       |       |       |       |        |      | Section 309 |        |        |       |       |       |      |       |     |     |     |      |
|                                         | (25565) | 25565  | 25570  | 25580  | 25590 | 25600    | 25610 | 25620 | 25630  | 25647 |        |       |       |       |       |       |        |      |             |        |        |       |       |       |      |       |     |     |     |      |
| K12 Zwischenstück 255.328 - 290.948     | (25121) | ATGACT | GCCCAG | CGTAT  | CGGCT | TCA      | CCAGT | CAG   | CCCG   | TTAC  | GGT    | TACAG | TGTG  | ACAC  | AGTG  | CGCG  | GT     | ACCT | TGGG        | ATT    | CA     | GCT   | CAC   |       |      |       |     |     |     |      |
| SARS-CoV-2 Reference Genome NC_045512.2 | (21768) | ATGTCT | CTGGGA | CCAAT  | GGTAC | TAA      | GAG   | GT    | TTGA   | ---   | TAAC   | CC    | TGTCC | TACC  | ATTT  | AATG  | ATG    | GT   | GTT         | T---   | ATTTT  | GCT   | TCC   |       |      |       |     |     |     |      |
| Consensus                               | (25565) | ATG    | CT     | C      | AT    | G        | T     | A     | GT     | G     | T      | AC    | T     | T     | A     | A     | TG     | GT   | T           | ATT    | GCT    | C     |       |       |      |       |     |     |     |      |
|                                         |         |        |        |        |       |          |       |       |        |       |        |       |       |       |       |       |        |      | Section 310 |        |        |       |       |       |      |       |     |     |     |      |
|                                         | (25648) | 25648  | 25660  | 25670  | 25680 | 25690    | 25700 | 25710 | 25720  | 25730 |        |       |       |       |       |       |        |      |             |        |        |       |       |       |      |       |     |     |     |      |
| K12 Zwischenstück 255.328 - 290.948     | (25204) | AGGAG  | GAGCAG | CATCA  | GCTCC | AGATG    | TGCG  | ACAA  | AAATGC | GGGA  | AGGCTT | CATCC | AGTT  | TGTAG | AGTCT | GCA   | CCTC   | ACTG | AA          | TGAG   |        |       |       |       |      |       |     |     |     |      |
| SARS-CoV-2 Reference Genome NC_045512.2 | (21845) | ACT-   | GAGAA  | GTCTAA | CAATA | -ATA     | AAG   | GCTGG | ATT    | TTGG  | TACTA  | CTT   | TAG-- | ATTC  | GAGA  | CC    | CAG    | TC   | CCT         | -ACT   | TATG   | --    |       |       |      |       |     |     |     |      |
| Consensus                               | (25648) | A      | GAG    | AG     | T     | A        | T     | A     | A      | G     | G      | A     | T     | GG    | A     | CTT   | A      | A    | T           | G      | AGA    | C     | G     | CCT   | ACT  | A     | TG  |     |     |      |
|                                         |         |        |        |        |       |          |       |       |        |       |        |       |       |       |       |       |        |      | Section 311 |        |        |       |       |       |      |       |     |     |     |      |
|                                         | (25731) | 25731  | 25740  | 25750  | 25760 | 25770    | 25780 | 25790 | 25800  | 25813 |        |       |       |       |       |       |        |      |             |        |        |       |       |       |      |       |     |     |     |      |
| K12 Zwischenstück 255.328 - 290.948     | (25287) | CCGG   | TGAAT  | CCA    | GC    | CCGG     | TCA   | GCCAG | AAATGC | AGAC  | GATGA  | CC    | TTC   | CTGC  | ACCA  | GT    | CGT    | CGT  | TCC         | GAA    | ACAC   | GGTGT | GATAT | C     |      |       |     |     |     |      |
| SARS-CoV-2 Reference Genome NC_045512.2 | (21921) | ---    | TTAAT  | AA     | GC    | TAC-     | TAA   | TGTT  | GTT    | ATT   | TAA    | AGT   | CTG   | TGA   | AT    | TTC   | AATTTT | --GT | AA          | TGA    | TCC    | ATTTT | TG    | GGTGT | TTAT | T     |     |     |     |      |
| Consensus                               | (25731) |        | T      | AAT    | GC    |          | T     | A     | G      | A     | T      | AG    | C     | TGA   | TTC   |       | GT     | TG   | TCC         |        | GGTGT  |       | T     |       |      |       |     |     |     |      |
|                                         |         |        |        |        |       |          |       |       |        |       |        |       |       |       |       |       |        |      | Section 312 |        |        |       |       |       |      |       |     |     |     |      |
|                                         | (25814) | 25814  | 25820  | 25830  | 25840 | 25850    | 25860 | 25870 | 25880  | 25896 |        |       |       |       |       |       |        |      |             |        |        |       |       |       |      |       |     |     |     |      |
| K12 Zwischenstück 255.328 - 290.948     | (25370) | T      | CGTTT  | AAG    | CCC   | CAAGT    | TTG   | AGT   | AGAGT  | CTT   | TATTC  | CT    | GT    | TA-   | AAG   | AA    | GAC    | AT   | GT          | TC     | GGCG   | AAT   | GAG   | AA    |      |       |     |     |     |      |
| SARS-CoV-2 Reference Genome NC_045512.2 | (21997) | C      | CACAA  | AA     | CA    | CA       | AA    | AG    | TTG    | GAT   | GGA    | AAG   | TGAG  | TTCA  | GAG   | TTT   | -ATTC  | TA   | GT          | GCG    | AA     | TAA   | TTG   | CACT  | TTT  | G---  | AAT | AT  | G   | TC   |
| Consensus                               | (25814) | C      |        | AA     | C     | C        | AA    | TTG   | T      | GA    | T      |       | TTCA  | A     | TTT   | ATTC  | GT     | AA   | AA          | CA     | TT     | G     |       | AAT   | G    |       |     |     |     |      |
|                                         |         |        |        |        |       |          |       |       |        |       |        |       |       |       |       |       |        |      | Section 313 |        |        |       |       |       |      |       |     |     |     |      |
|                                         | (25897) | 25897  | 25910  | 25920  | 25930 | 25940    | 25950 | 25960 | 25979  |       |        |       |       |       |       |       |        |      |             |        |        |       |       |       |      |       |     |     |     |      |
| K12 Zwischenstück 255.328 - 290.948     | (25452) | T      | ATTT   | GCCT   | GCCG  | CCGACA   | ATC   | AGG   | TGG    | TC    | G      | GGG   | ACAT  | GGT   | GA    | ACAC  | TTT    | TT   | AA          | ATC    | CT     | TT    | ACCA  | TGGT  | GAT  | CG    | ACT | TTT | T   |      |
| SARS-CoV-2 Reference Genome NC_045512.2 | (22076) | TC     | TCA    | GCCT   | TTT   | CTT      | ATGG  | AC    | TT     | G     | AAG    | --G   | AAA   | ACAG  | GGT   | AA--- | TTT    | CA   | AAA         | ATC    | T      | AGG   | GAAT  | TT    | GTGT | TTA   | AGA | AT  | T   |      |
| Consensus                               | (25897) | T      | T      | GCCT   |       | A        | C     | G     | G      | G     | ACA    | GGT   | A     | TTT   | AA    | ATC   | T      |      |             |        |        | T     | GTG   | T     | A    | T     | T   |     |     |      |
|                                         |         |        |        |        |       |          |       |       |        |       |        |       |       |       |       |       |        |      | Section 314 |        |        |       |       |       |      |       |     |     |     |      |
|                                         | (25980) | 25980  | 25990  | 26000  | 26010 | 26020    | 26030 | 26040 | 26050  | 26062 |        |       |       |       |       |       |        |      |             |        |        |       |       |       |      |       |     |     |     |      |
| K12 Zwischenstück 255.328 - 290.948     | (25535) | C      | TTCA   | GGT    | CGAT  | CACCCCA  | CT    | TTG   | GTGCTG | TA    | CCAC   | CAC   | ACCT  | CG    | TAGC  | TGCCG | TCT    | TC   | TGC         | ATCTCC | TCAG   | CCCG  | ACCC  |       |      |       |     |     |     |      |
| SARS-CoV-2 Reference Genome NC_045512.2 | (22153) | -      | TGAT   | GGT    | TAT   | TTTAAAAT | A     | TATTC | -----  | TA    | AGCA   | CAC   | GCT   | AT    | TA    | AT    | T----  | TAG  | TG          | CGTG   | ATCTCC | TCAG  | GGTTT | ---   |      |       |     |     |     |      |
| Consensus                               | (25980) |        | T      | GGT    | T     |          | A     | TTC   |        | TA    |        | CAC   | CCT   | TA    | T     |       | T      | T    | C           | ATCTCC | TCAG   |       |       |       |      |       |     |     |     |      |
|                                         |         |        |        |        |       |          |       |       |        |       |        |       |       |       |       |       |        |      | Section 315 |        |        |       |       |       |      |       |     |     |     |      |
|                                         | (26063) | 26063  | 26070  | 26080  | 26090 | 26100    | 26110 | 26120 | 26130  | 26145 |        |       |       |       |       |       |        |      |             |        |        |       |       |       |      |       |     |     |     |      |
| K12 Zwischenstück 255.328 - 290.948     | (25618) | G      | TTCTC  | CC     | TGA   | CG       | CTTG  | CCT   | GCGT   | T     | CAG    | ACT   | TACCC | TTT   | CA    | CGCTC | AG     | TTTC | CGCTG       | A      | T      | CC    | ACTTT | CT    | TAC  | CATC  |     |     |     |      |
| SARS-CoV-2 Reference Genome NC_045512.2 | (22222) | -      | TTG    | GG     | CTT   | TGA      | AAC   | CA    | TTG    | G     | TAG    | ATT   | TGCC  | AT    | TAGG  | TAT   | TAA    | CA   | T           | CACT   | AG     | TTTC  | A---- | AAC   | TTT  | ACTTT | G   | CT  | TAC | ATAG |
| Consensus                               | (26063) |        | TTC    | C      | T     | A        | C     | TTG   | G      | T     | A      | T     |       | T     | CA    |       | AG     | TTTC |             | A      | T      | ACTT  | C     | T     | AC   |       |     |     |     |      |

Sars-CoV-2 & E.coli K12 Zwischenstück.eapr.apr

|                                                 |                                                                                      |                            |                          |               |                |                   |                |            |              |             |           |        |        |        |       |      |       |      |     |       |    |     |     |
|-------------------------------------------------|--------------------------------------------------------------------------------------|----------------------------|--------------------------|---------------|----------------|-------------------|----------------|------------|--------------|-------------|-----------|--------|--------|--------|-------|------|-------|------|-----|-------|----|-----|-----|
|                                                 |                                                                                      |                            |                          |               |                |                   |                |            |              | Section 316 |           |        |        |        |       |      |       |      |     |       |    |     |     |
| (26146)                                         | 26146                                                                                | 26160                      | 26170                    | 26180         | 26190          | 26200             | 26210          | 26228      |              |             |           |        |        |        |       |      |       |      |     |       |    |     |     |
| K12 Zwischenstück 255.328 - 290.948 (25701)     | ACCCCTTCATCGTAT                                                                      | TCCGGGGCGTTGTTGCCCTGTAGTGC | CGC-GCTGACGGCTGATACCGCCA |               |                |                   |                |            |              |             |           |        |        |        |       |      |       |      |     |       |    |     |     |
| SARS-CoV-2 Reference Genome NC_045512.2 (22300) | AAG---TTATTGAC                                                                       | TCCGGTGATCTCTTT            | CAGTTGGACAGTGGT          | GCTG-CAGCTTAT | TATGTGGGTTATCT | TTCAA             | CC-            |            |              |             |           |        |        |        |       |      |       |      |     |       |    |     |     |
| Consensus (26146)                               | A                                                                                    | TAT                        | A                        | TCCGG         | G              | T                 | T              | TT         | G            | TGACGC      | G         | GCTG   | C      | GCT    | AT    | G    | G     | G    | T   | C     | CC |     |     |
|                                                 |                                                                                      |                            |                          |               |                |                   |                |            |              | Section 317 |           |        |        |        |       |      |       |      |     |       |    |     |     |
| (26229)                                         | 26229                                                                                | 26240                      | 26250                    | 26260         | 26270          | 26280             | 26290          | 26300      | 26311        |             |           |        |        |        |       |      |       |      |     |       |    |     |     |
| K12 Zwischenstück 255.328 - 290.948 (25783)     | TATCCAGCGCCTCGTGCGGGCGTTCAAGGTTATAGACCGTCCGCGCAGTGGTCGAAGGCGCGCTGCAGTTACCCGCTGTCTGCG |                            |                          |               |                |                   |                |            |              |             |           |        |        |        |       |      |       |      |     |       |    |     |     |
| SARS-CoV-2 Reference Genome NC_045512.2 (22378) | --TAGGACTTTTC                                                                        | TATTAAATA                  | TATGAAAT                 | ATGAAC        | CATTACAGATGCT  | GTAGACTG--        | TGCACTTGACC    | CTCTCTCAG  |              |             |           |        |        |        |       |      |       |      |     |       |    |     |     |
| Consensus (26229)                               | T                                                                                    | C                          | TC                       | T             | A              | G                 | AT             | GA         | C            | C           | TG        | T      | G      | AG     | C     | TGCA | TT    | ACC  | CT  | TCT   | G  |     |     |
|                                                 |                                                                                      |                            |                          |               |                |                   |                |            |              | Section 318 |           |        |        |        |       |      |       |      |     |       |    |     |     |
| (26312)                                         | 26312                                                                                | 26320                      | 26330                    | 26340         | 26350          | 26360             | 26370          | 26380      | 26394        |             |           |        |        |        |       |      |       |      |     |       |    |     |     |
| K12 Zwischenstück 255.328 - 290.948 (25866)     | AACCAATTTTCCCTGCAGCACTTCCGCCTTCAAGCTGCGGTGAAAACGC                                    | TCAGCTTC                   | CCCTGCGTCTGCGATGAT       | AA            | GGCCG          |                   |                |            |              |             |           |        |        |        |       |      |       |      |     |       |    |     |     |
| SARS-CoV-2 Reference Genome NC_045512.2 (22455) | AAACAAGTGTACGTTGAAT----                                                              | CCTTCA--                   | CTGTAG                   | AAAA          | GGAA           | TC                | TATCAA         | CT--       | TCTAA        | CTTTA       | GAGTCC    | AA     | CCAAC  |        |       |      |       |      |     |       |    |     |     |
| Consensus (26312)                               | AA                                                                                   | CA                         | T                        | G             | G              | A                 | T              | CCTTCA     | CTG          | G           | AAA       | TC     | A      | C      | C     | T    | CT    | GA   | AA  | CCAAC |    |     |     |
|                                                 |                                                                                      |                            |                          |               |                |                   |                |            |              | Section 319 |           |        |        |        |       |      |       |      |     |       |    |     |     |
| (26395)                                         | 26395                                                                                | 26400                      | 26410                    | 26420         | 26430          | 26440             | 26450          | 26460      | 26477        |             |           |        |        |        |       |      |       |      |     |       |    |     |     |
| K12 Zwischenstück 255.328 - 290.948 (25949)     | GAGTGTGCCCCACCCGGA                                                                   | TCCAGGCGCATCAGC            | CACAGCTCCAGCGCCGTCCA     | GGTGTGTCGCCC  | CACGGTGAGC     |                   |                |            |              |             |           |        |        |        |       |      |       |      |     |       |    |     |     |
| SARS-CoV-2 Reference Genome NC_045512.2 (22531) | AGAATCTATTGTTA                                                                       | GATTTCTTA-----             | ATATTA                   | CAAACTT---    | GTGCC          | TTTTGGTG          | AA             | TTTTTAA    | CGCC         | C           | CAGATTTGC |        |        |        |       |      |       |      |     |       |    |     |     |
| Consensus (26395)                               | GA                                                                                   | T                          | G                        | T             | CC             | A                 | AT             | CA         | A            | T           | G         | GCC    | T      | GGTG   | G     | T    | T     | CGCC | C   | G     | T  | GC  |     |
|                                                 |                                                                                      |                            |                          |               |                |                   |                |            |              | Section 320 |           |        |        |        |       |      |       |      |     |       |    |     |     |
| (26478)                                         | 26478                                                                                | 26490                      | 26500                    | 26510         | 26520          | 26530             | 26540          | 26550      | 26560        |             |           |        |        |        |       |      |       |      |     |       |    |     |     |
| K12 Zwischenstück 255.328 - 290.948 (26032)     | CGTTAT                                                                               | TCCATGGTTCATCCGGT          | CCGGCAGGCCGTAA           | CGCTCAA       | ACACGCTTGAC    | CAGCTGCTGCTGCTGCA | CGGTCT         | CGCG       | CCGTTCA      |             |           |        |        |        |       |      |       |      |     |       |    |     |     |
| SARS-CoV-2 Reference Genome NC_045512.2 (22606) | ATCTGTTT                                                                             | ATGCTTG---                 | GAA                      | CAGGAAGAGAA   | TCAG---        | CAACTGTGTG--      | CTGATTATTCTGTC | TATATAATT  | CCG--        | CA          |           |        |        |        |       |      |       |      |     |       |    |     |     |
| Consensus (26478)                               | T                                                                                    | T                          | ATG                      | T             | G              | C                 | GG             | AG         | T            | A           | CAA       | G      | TG     | C      | G     | T    | T     | CTG  | C   | T     | T  | CCG | CA  |
|                                                 |                                                                                      |                            |                          |               |                |                   |                |            |              | Section 321 |           |        |        |        |       |      |       |      |     |       |    |     |     |
| (26561)                                         | 26561                                                                                | 26570                      | 26580                    | 26590         | 26600          | 26610             | 26620          | 26630      | 26643        |             |           |        |        |        |       |      |       |      |     |       |    |     |     |
| K12 Zwischenstück 255.328 - 290.948 (26115)     | TCGGTACAGTGC                                                                         | GC                         | CAGGC                    | AC            | AGGGAA         | AAACGGAGAGTGGTGC  | TCCAGCAGGGTG   | AGCGGATGGC | AGCGTCCACCGC | CAA         | AAGG      |        |        |        |       |      |       |      |     |       |    |     |     |
| SARS-CoV-2 Reference Genome NC_045512.2 (22679) | TCAT                                                                                 | T-----                     | TTCCAC                   | TTTT          | A              | AGTGTTA           | T---GGAGTG     | TC         | TCC          | TAG         | TAAATTA   | AATGAT | CTCT   | GCTTTA | ----- | CTAA | ----- |      |     |       |    |     |     |
| Consensus (26561)                               | TC                                                                                   | T                          | T                        | C             | C              | A                 | AG             | G          | A            | GGAGTG      | TC        | TCC    | C      | T      | A     | GAT  | C     | GC   | T   | C     | AA |     |     |
|                                                 |                                                                                      |                            |                          |               |                |                   |                |            |              | Section 322 |           |        |        |        |       |      |       |      |     |       |    |     |     |
| (26644)                                         | 26644                                                                                | 26650                      | 26660                    | 26670         | 26680          | 26690             | 26700          | 26710      | 26726        |             |           |        |        |        |       |      |       |      |     |       |    |     |     |
| K12 Zwischenstück 255.328 - 290.948 (26198)     | AAAGTGGCCCTTAA                                                                       | AAATCATCTGCC               | AGAG                     | GGTTCGG       | CGCGTCTGTTC    | GAACCGGC          | CGGTGGC        | GGGAATGCC  | CGGTGAAG     |             |           |        |        |        |       |      |       |      |     |       |    |     |     |
| SARS-CoV-2 Reference Genome NC_045512.2 (22744) | ----                                                                                 | TGTCTATGC                  | AGATT                    | CATTGTA       | ATTAG          | GGTGAT            | GAA-GTC        | AGA--      | CAAA         | TCGTCC      | AGGGC     | A--    | AA---- | CTGGA  | AAG   |      |       |      |     |       |    |     |     |
| Consensus (26644)                               |                                                                                      | TG                         | C                        | T             | A              | AT                | CAT            | TG         | A            | G           | GGT       | G      | GTC    |        | C     | AA   | CG    | CC   | GGC | AA    | C  | G   | AAG |

Sars-CoV-2 & E.coli K12 Zwischenstückaprr.apr

|                                         |         |       |              |          |             |            |          |            |          |               |         |            |          |        |       |           |          |         |           |       |        |      |       |      |       |     |     |      |     |
|-----------------------------------------|---------|-------|--------------|----------|-------------|------------|----------|------------|----------|---------------|---------|------------|----------|--------|-------|-----------|----------|---------|-----------|-------|--------|------|-------|------|-------|-----|-----|------|-----|
|                                         |         |       |              |          |             |            |          |            |          | Section 323   |         |            |          |        |       |           |          |         |           |       |        |      |       |      |       |     |     |      |     |
|                                         | (26727) | 26727 | 26740        | 26750    | 26760       | 26770      | 26780    | 26790      | 26809    |               |         |            |          |        |       |           |          |         |           |       |        |      |       |      |       |     |     |      |     |
| K12 Zwischenstück 255.328 - 290.948     | (26281) | CGCC  | CGGCAGCAGGCC | ATGGCGGG | CCA         | TCA        | GGTTATGG | ACGGTGC    | TGAAGGCG | GGCATGGTGTGCC | CTGGTCC | TCGAGCCAG  |          |        |       |           |          |         |           |       |        |      |       |      |       |     |     |      |     |
| SARS-CoV-2 Reference Genome NC_045512.2 | (22814) | ATTG  | CTGATTATAATT | ATAAATTA | CCA         | GAT        | GATT     | TACAGGCTGC | -----    | GTTATAG       | -----   | CTTGGAAAT  | TCTAACAA |        |       |           |          |         |           |       |        |      |       |      |       |     |     |      |     |
| Consensus                               | (26727) |       | C G          | AT       | CCA         | G T T T    | A G TGC  |            |          | G AT G        | C TGG   | TC A C A   |          |        |       |           |          |         |           |       |        |      |       |      |       |     |     |      |     |
|                                         |         |       |              |          |             |            |          |            |          | Section 324   |         |            |          |        |       |           |          |         |           |       |        |      |       |      |       |     |     |      |     |
|                                         | (26810) | 26810 | 26820        | 26830    | 26840       | 26850      | 26860    | 26870      | 26880    | 26892         |         |            |          |        |       |           |          |         |           |       |        |      |       |      |       |     |     |      |     |
| K12 Zwischenstück 255.328 - 290.948     | (26364) | CGCT  | TTAATCT      | TGC      | GGGCTCCCCAG | CGCT       | TATGACGG | T          | CAT      | GGG           | CA      | TACGC      | AGCAG    | GGCCGT | GAT   | GTC       | GT       | C       | AGAT      | TG    | AGCGG  | TT   |       |      |       |     |     |      |     |
| SARS-CoV-2 Reference Genome NC_045512.2 | (22883) | C     | --TTGATTC    | TAA      | GGTTG----   | GTGGT      | AAATA    | ---        | TAAT     | TAC           | CTG     | TAT--      | AGATT    | GTTTAG | GA    | AGTC      | -TAATC   | TCAAACC | TT        |       |        |      |       |      |       |     |     |      |     |
| Consensus                               | (26810) | C     | TT AT T      | GG       |             | G G T AT A | T AT     | C TA       | AG       | G             | GA GTC  | T A        | T A      | TT     |       |           |          |         |           |       |        |      |       |      |       |     |     |      |     |
|                                         |         |       |              |          |             |            |          |            |          | Section 325   |         |            |          |        |       |           |          |         |           |       |        |      |       |      |       |     |     |      |     |
|                                         | (26893) | 26893 | 26900        | 26910    | 26920       | 26930      | 26940    | 26950      | 26960    | 26975         |         |            |          |        |       |           |          |         |           |       |        |      |       |      |       |     |     |      |     |
| K12 Zwischenstück 255.328 - 290.948     | (26447) | CG    | GGGAATGG     | TGCGG    | AATGC       | GCGG       | GCGG     | TC         | CTGA     | AGA           | CCGG    | CG         | GCAC     | CTT    | CCT   | GAGCCCAG  | GC       | GC      | TGGAG     | CCAC  | TTGTAG | CCGG |       |      |       |     |     |      |     |
| SARS-CoV-2 Reference Genome NC_045512.2 | (22953) | TT    | GAGAGAT      | ----     | ATT         | CAACT      | GAAA     | TC         | TATC     | AG            | G       | CCGG       | TA       | GCAC   | A--   | CCT       | TGTAATG  | GT      | GT        | TGAAG | GTTTT  | TAA  | TTG   | TTAC |       |     |     |      |     |
| Consensus                               | (26893) |       | G GA G T     |          | A T C       | G          | TC       |            | AG       | CCGG          | GCAC    | CCT        |          |        |       | G G TG AG |          | T       | T         | G     |        |      |       |      |       |     |     |      |     |
|                                         |         |       |              |          |             |            |          |            |          | Section 326   |         |            |          |        |       |           |          |         |           |       |        |      |       |      |       |     |     |      |     |
|                                         | (26976) | 26976 | 26990        | 27000    | 27010       | 27020      | 27030    | 27040      | 27058    |               |         |            |          |        |       |           |          |         |           |       |        |      |       |      |       |     |     |      |     |
| K12 Zwischenstück 255.328 - 290.948     | (26530) | TGG   | CAGGTGA      | AATGC    | GAA         | GC         | ACGG     | CA         | GAGGGA   | ACGG          | ATG     | TTCGCCCC   | GTCC     | TGC    | GAGG  | CG        | AACAAACA | AACT    | C         | AGTAC | GT     |      |       |      |       |     |     |      |     |
| SARS-CoV-2 Reference Genome NC_045512.2 | (23030) | TTT   | CCTTTAC      | AAT--    | CATA        | TG         | TTTC     | CA         | ACCC--   | ACTA          | ATG     | -----      | GTGT     | TG     | -GTTA | CA        | AAC      | CAT     | ACAG      | AGT   | -AGTA  | -GT  |       |      |       |     |     |      |     |
| Consensus                               | (26976) | T     | C            | T AAT    | C A G       | CA         |          | AC         | ATG      |               |         |            | GT       | TG     | G     | C         | AAC      | A       | ACA       | A     | T      | AGTA | GT    |      |       |     |     |      |     |
|                                         |         |       |              |          |             |            |          |            |          | Section 327   |         |            |          |        |       |           |          |         |           |       |        |      |       |      |       |     |     |      |     |
|                                         | (27059) | 27059 | 27070        | 27080    | 27090       | 27100      | 27110    | 27120      | 27130    | 27141         |         |            |          |        |       |           |          |         |           |       |        |      |       |      |       |     |     |      |     |
| K12 Zwischenstück 255.328 - 290.948     | (26613) | AAT   | GACAT        | TGGTAT   | CTCTCG      | CAT        | CCCAGG   | GCA        | TA       | AGC           | GACT    | CCATAAACGG | GTT      | CT     | TATG  | CCT       | TAGTTGT  | AAGT    | GT        | -CTA  | CCAT   |      |       |      |       |     |     |      |     |
| SARS-CoV-2 Reference Genome NC_045512.2 | (23098) | AC    | TTTCTTTTGA   | AACTTCTA | CAT         | -----      | GCA      | CC         | AGCA     | ACT           | -----   | GTT        | TG       | TGGA   | CCT   | AAA       | ----     | AAGT    | C         | TACTA | ATTT   |      |       |      |       |     |     |      |     |
| Consensus                               | (27059) | A     | T C T        | A CT     | CAT         |            |          | GCA        | AGC      | ACT           |         |            | GTT      | T      | CCT   | A         | AAGT     | T       | CTA       | T     |        |      |       |      |       |     |     |      |     |
|                                         |         |       |              |          |             |            |          |            |          | Section 328   |         |            |          |        |       |           |          |         |           |       |        |      |       |      |       |     |     |      |     |
|                                         | (27142) | 27142 | 27150        | 27160    | 27170       | 27180      | 27190    | 27200      | 27210    | 27224         |         |            |          |        |       |           |          |         |           |       |        |      |       |      |       |     |     |      |     |
| K12 Zwischenstück 255.328 - 290.948     | (26695) | GT    | CCCCG        | AACAA    | GTGT        | -TCA       | CTAT     | GTG        | CCGG     | A             | CG      | TAC        | AC       | CCAA   | AGG   | GG        | AG       | AGGGG   | ACTG      | CAC   | CGAGC  | ATCT | -TTTC | CCC  |       |     |     |      |     |
| SARS-CoV-2 Reference Genome NC_045512.2 | (23161) | GG    | TTAAA        | AACAA    | TGT         | G          | TCA      | ATT        | CA       | ATT           | CA      | ATG        | GT       | TT     | A     | C         | AGGC     | AC      | AGG       | T     | TTCTT  | ACTG | AGT   | CTA  | AC    | AAA | AG  | TTTC | TGC |
| Consensus                               | (27142) | G     |              | AACAA    | TGT         | TCA        | T T      | C          | A        | GT            | A C     | A          | GG       | G      | ACTG  | C         | A        | C       | A         | TTTC  | C      |      |       |      |       |     |     |      |     |
|                                         |         |       |              |          |             |            |          |            |          | Section 329   |         |            |          |        |       |           |          |         |           |       |        |      |       |      |       |     |     |      |     |
|                                         | (27225) | 27225 | 27230        | 27240    | 27250       | 27260      | 27270    | 27280      | 27290    | 27307         |         |            |          |        |       |           |          |         |           |       |        |      |       |      |       |     |     |      |     |
| K12 Zwischenstück 255.328 - 290.948     | (26776) | CT    | CG           | CC--     | CCT         | TTGGG      | AGAG     | GG         | CGG      | GG            | TGA     | GGGG       | CA       | ATA    | TG    | TGAT      | C        | AG      | CTTAAATTT | CCG   | CAC    | TCC  | CTCTT | CC   | CTT   | CCG |     |      |     |
| SARS-CoV-2 Reference Genome NC_045512.2 | (23244) | CT    | TT           | CCAA     | CAA         | TTT        | GG       | CAGAG      | A        | -CATT         | G       | CTGA       | ----     | CA     | CTA   | C         | TGAT     | G       | CTG       | T     | -----  | CCG  | TGA   | TCC  | ACAGA | CA  | CTT | GAG  |     |
| Consensus                               | (27225) | CT    | CC           | C        | TT          | GG         | AGAG     | C          | G        | TGA           | CA      | TA         | TGAT     | C      | G     | CCG       | TCC      |         |           |       |        | CCG  | TCC   | C    | CTT   | G   |     |      |     |



Sars-CoV-2 & E.coli K12 Zwischenstück.eapr.apr

|                                                 |              |            |                |               |               |             |            |             |                |                    |
|-------------------------------------------------|--------------|------------|----------------|---------------|---------------|-------------|------------|-------------|----------------|--------------------|
|                                                 |              |            |                |               |               |             |            |             |                | Section 330        |
| (27308)                                         | 27308        | 27320      | 27330          | 27340         | 27350         | 27360       | 27370      | 27380       | 27390          |                    |
| K12 Zwischenstück 255.328 - 290.948 (26857)     | ATT TACCTCTC | CTTG TTCTG | GGT CATAGT     | ATG ATCGTT    | AAA TAAACGA   | ACGC TGTTCT | TATAATGTA  | GAACAAAA    | TGATTCAGC      |                    |
| SARS-CoV-2 Reference Genome NC_045512.2 (23312) | ATT -----    | CTTG A---  | CATTAACA       | CCATGTTCT     | TTTGGTGGT     | GTCAG--     | TGTTATAACA | CCAGGAACAAA | TACTTC--       |                    |
| Consensus (27308)                               | ATT          | CTTG       | C T A A        | ATG TC TT     | T             | A           | TGTT TA    | A           | GAACAAA T TTC  |                    |
|                                                 |              |            |                |               |               |             |            |             |                | Section 331        |
| (27391)                                         | 27391        | 27400      | 27410          | 27420         | 27430         | 27440       | 27450      | 27460       | 27473          |                    |
| K12 Zwischenstück 255.328 - 290.948 (26940)     | AA GGAGATCT  | CATGCC     | GCAGTC         | CGCGT         | TGTT CACGGGA  | -ATCAT      | TCCCCT     | TGTCTCCACC  | ATT TTTACCGC   | -CGACGGCCAGC       |
| SARS-CoV-2 Reference Genome NC_045512.2 (23378) | AA CCAGGTTG  | CTGTTCTTTA | TCAG-GAT       | GTTAAC        | TGCACAGAAG    | TCCC        | TGTTGCT    | -----       | ATTCATGCAGAT   | CAACTTACTCC        |
| Consensus (27391)                               | AA           | AG T C     | C              | TC G G        | TGTT AC G A A | A TCCC      | T CT       |             | ATT T C G C AC | C C                |
|                                                 |              |            |                |               |               |             |            |             |                | Section 332        |
| (27474)                                         | 27474        | 27480      | 27490          | 27500         | 27510         | 27520       | 27530      | 27540       | 27556          |                    |
| K12 Zwischenstück 255.328 - 290.948 (27021)     | TCGATTAAGC   | CGGCACCCGC | GCGCTGAT       | CGACGATCT     | GATCAAGCAG    | GGCGTTGA    | CGGCTGT    | TCTTCT      | GGGCAGCGG      | TGGC               |
| SARS-CoV-2 Reference Genome NC_045512.2 (23455) | TACTT--GG    | CGTGTTTATT | CTACAGGT       | CTTA--AT      | GTTT TTC      | AAACAGTG    | -----      | CAGGCTGTT   | TAATAG         | GGGC-----TGAA      |
| Consensus (27474)                               | T T G CG G   | C          | G TC A         | AT T T        | AA CA G G     | C G CTGTT   |            | GGGC        |                | TG                 |
|                                                 |              |            |                |               |               |             |            |             |                | Section 333        |
| (27557)                                         | 27557        | 27570      | 27580          | 27590         | 27600         | 27610       | 27620      |             | 27639          |                    |
| K12 Zwischenstück 255.328 - 290.948 (27104)     | GAGTTCCTCA   | AGTCGGCG   | CGAAGAGC       | GTAAAGC       | CAT TGC       | CCCGCT      | TTGCTATC   | GATCATGT    | CGATCGTCGCGT   | GCCGGTG-C          |
| SARS-CoV-2 Reference Genome NC_045512.2 (23525) | CA TGTCACAA  | -----      | CTCATATGAG     | TGTGA--       | CATAC         | CCA--       | TTGGTGCAG  | GTATATG     | CGTAGTTATCA    | GACTCAGAC          |
| Consensus (27557)                               | A TC C A     |            | C C A GAG GT A | CAT CC        | TTG T         | G T         | CG T GT    |             | G C G C        |                    |
|                                                 |              |            |                |               |               |             |            |             |                | Section 334        |
| (27640)                                         | 27640        | 27650      | 27660          | 27670         | 27680         | 27690       | 27700      | 27710       | 27722          |                    |
| K12 Zwischenstück 255.328 - 290.948 (27186)     | TGATCGGCAC   | CGGCGG-    | CAGCAA         | CGCCCGGGA     | AAACATC       | GAACTCA     | GCCAGCAC   | GCGCAG      | CAGGCGGGCG     | GGA CGGCATCGT      |
| SARS-CoV-2 Reference Genome NC_045512.2 (23596) | TAATCTCTCT   | CGGCGGG    | CAGGTAGTGTA    | GCTAGTCA      | ATCCATCATT    | GCCTA       | CAC        | TAT--       | GTCACCTTGGTGC  | AGAA--ATTCA        |
| Consensus (27640)                               | T AT C       | CGGCGG     | CAC A          | G A C ATC A C | GCC           | CAC         | G          | GG GC GA    | AT             |                    |
|                                                 |              |            |                |               |               |             |            |             |                | Section 335        |
| (27723)                                         | 27723        | 27730      | 27740          | 27750         | 27760         | 27770       | 27780      | 27790       | 27805          |                    |
| K12 Zwischenstück 255.328 - 290.948 (27268)     | GGTGATCA     | ACCCCTAC   | TACTGGAA       | AGTGTCT       | GGAAAGCA      | ACCTGAT     | CCGCTATTT  | CGAGCAG     | GTGGCCGACAG    | CGTCA              |
| SARS-CoV-2 Reference Genome NC_045512.2 (23675) | GT TGC T     | -----      | TACTCTAA       | TAAC TC       | TATTGC        | CATACCA     | -CAAA      | TTT TACT    | ATTAGTGT       | TACACAGAA--ATTCTAC |
| Consensus (27723)                               | G TG T       |            | TACT AA        | TC            | GC A C        | A C         | T TT C A   | AG          | C ACAG         | A CT C             |
|                                                 |              |            |                |               |               |             |            |             |                | Section 336        |
| (27806)                                         | 27806        | 27820      | 27830          | 27840         | 27850         | 27860       | 27870      |             | 27888          |                    |
| K12 Zwischenstück 255.328 - 290.948 (27351)     | CGGTGATGC    | TCTATAAC   | TT--CC         | CGGCCTGA      | CCGGGCA       | GGATCTGAC   | TCCGGCGCT  | TGGTGAAA    | ACCCTCGCCGA    | CTCGCGCA           |
| SARS-CoV-2 Reference Genome NC_045512.2 (23745) | CAGTG----    | TCTATGAC   | CAAGATCA       | GATGATT       | GTA           | CAATGT      | TACATT     | TGTGGTGAT   | TCAACTGA       | ATGCA GCAATCTTTTGT |
| Consensus (27806)                               | C GTG        | TCTAT AC   | C              | G GA G CA     | T             | T           | GG G T     | A           | GC CT          | G                  |



Sars-CoV-2 & E.coli K12 Zwischenstück.epr.apr

|                                                 |                |                                                                 |                                    |                           |                 |                 |          |             |         |             |
|-------------------------------------------------|----------------|-----------------------------------------------------------------|------------------------------------|---------------------------|-----------------|-----------------|----------|-------------|---------|-------------|
|                                                 |                |                                                                 |                                    |                           |                 |                 |          |             |         | Section 337 |
| (27889)                                         | 27889          | 27900                                                           | 27910                              | 27920                     | 27930           | 27940           | 27950    | 27960       | 27971   |             |
| K12 Zwischenstück 255.328 - 290.948 (27432)     | GCAATA         | -----TTATCGGCATCAAAGACACCATCGAC                                 | TCGGTTCGCCCACCTGCGCAGCATGATCCATACC | CGTCAAAGGTGCC             |                 |                 |          |             |         |             |
| SARS-CoV-2 Reference Genome NC_045512.2 (23824) | GCAATA         | TGGCAGTTTGTGTACAACTTAACCTGCTTAACTGGAAATAGCTGTTGAACAAGA-CAAAACAC | CCAAGAGTT                          |                           |                 |                 |          |             |         |             |
| Consensus (27889)                               | GCAATA         | TT T G                                                          | CAA A ACC T                        | T T G                     | A CTG           | A CA GA C A A C | C AAG G  |             |         |             |
|                                                 |                |                                                                 |                                    |                           |                 |                 |          |             |         | Section 338 |
| (27977)                                         | 27972          | 27980                                                           | 27990                              | 28000                     | 28010           | 28020           | 28030    | 28040       | 28054   |             |
| K12 Zwischenstück 255.328 - 290.948 (27509)     | CATCGGCACTTCA  | CCGTGCTCTGGGGCTACGACGATCATCTGTTCAATACCC                         | TGCTGCTCGGCGGCGACGGGGCG            | ATATCGGC                  |                 |                 |          |             |         |             |
| SARS-CoV-2 Reference Genome NC_045512.2 (23906) | TTTGCAAGTCA    | AACAAATTAC-----AAAC-ACCA                                        | CAATTAAGATTTTGGTGGT                | TTTAATTTTTCACAA-ATAT      | TAC             |                 |          |             |         |             |
| Consensus (27972)                               | T C CA         | TCA                                                             | T T C                              | A AC A CA C               | TT AA A         | TG TG T         |          | ATAT        | C       |             |
|                                                 |                |                                                                 |                                    |                           |                 |                 |          |             |         | Section 339 |
| (28055)                                         | 28055          | 28060                                                           | 28070                              | 28080                     | 28090           | 28100           | 28110    | 28120       | 28137   |             |
| K12 Zwischenstück 255.328 - 290.948 (27592)     | GAGCGGCAACTTTG | CCGCAAGGTGTCGTGAATCTTCTGAAAGC                                   | CTGGCGCGACGGGGACGTGGCGAAAGCGG      | --CGGGTA                  |                 |                 |          |             |         |             |
| SARS-CoV-2 Reference Genome NC_045512.2 (23983) | -AGATCCATCAAAA | CCAAAGCAAGAG---GTCA                                             | TTAT-TGAA                          | GATCTA-CTTTT              | CAACAAGTGACACTT | GCAGATGCTGG     | CT       |             |         |             |
| Consensus (28055)                               | AG CA C        | CC GCA G G                                                      | GT A T T TGAA                      | CT C                      | C A GTG C       | GC G            | C GG     |             |         |             |
|                                                 |                |                                                                 |                                    |                           |                 |                 |          |             |         | Section 340 |
| (28138)                                         | 28138          | 28150                                                           | 28160                              | 28170                     | 28180           | 28190           | 28200    | 28210       | 28220   |             |
| K12 Zwischenstück 255.328 - 290.948 (27673)     | TCATCAGACCTT   | GCTGCAAAATTC                                                    | --GCAGATGTATCAGCTGGATACGC          | CGTTTGTGAACGTGATTAAAGAGGC | GATCGTGCT       |                 |          |             |         |             |
| SARS-CoV-2 Reference Genome NC_045512.2 (24060) | TCATCAAA       | AAATATGTTGATTTGCC                                               | TTGTGATATTGCTGCTAGAACCTCA          | TTTGTGACAAAAAGTTTAAC      | GGCCTTAC        | TGTT            |          |             |         |             |
| Consensus (28138)                               | TCATCA AC      | T G A T CC G                                                    | GAT T C GCT GA AC                  | C TTTGTG AC               | A T A GGC       | T TG T          |          |             |         |             |
|                                                 |                |                                                                 |                                    |                           |                 |                 |          |             |         | Section 341 |
| (28221)                                         | 28221          | 28230                                                           | 28240                              | 28250                     | 28260           | 28270           | 28280    | 28290       | 28303   |             |
| K12 Zwischenstück 255.328 - 290.948 (27754)     | CTGGGGTTCGT    | CCTGTCTC                                                        | CACGACGTGTC                        | CC-GCCGCCTCGCG            | CTGGACGAGCC     | GCGCAAGGCGCA    | GCTGA    | AAACCTG     |         |             |
| SARS-CoV-2 Reference Genome NC_045512.2 (24143) | TTCGCA----     | CCTTTGCT                                                        | CACAGATGAAATGATTGCT                | CAATAACATTCTGC            | ACTGTTA         | GCG-----        | GTACAA   | CACTT       |         |             |
| Consensus (28221)                               | TGC            | CCT T                                                           | CAC A G                            | TG GC C                   | C C CTG AC      | GCG             |          | G T AA C CT |         |             |
|                                                 |                |                                                                 |                                    |                           |                 |                 |          |             |         | Section 342 |
| (28304)                                         | 28304          | 28310                                                           | 28320                              | 28330                     | 28340           | 28350           | 28360    | 28370       | 28386   |             |
| K12 Zwischenstück 255.328 - 290.948 (27836)     | CTGCAACA       | GCTCAAGCTTTGCTG                                                 | -AGCCGGACGATACGATG                 | ACCATTGAGAA               | AAATTTTCAC      | CCCGCAGG        | ACGACGC  | GTTTT       |         |             |
| SARS-CoV-2 Reference Genome NC_045512.2 (24213) | CTG-----       | GTGGACCTTTG                                                     | TGTCAGGTGCTGC                      | ATACAAATACCATT            | TGCTATGCA       | AATGG           | CTTATAGG | TTTAATG     | GTATTG  |             |
| Consensus (28304)                               | CTG            | G T A CTTTG                                                     | TG AG G                            | AT AC A ACCATT            | A               | C AGG           | A        | GT TT       |         |             |
|                                                 |                |                                                                 |                                    |                           |                 |                 |          |             |         | Section 343 |
| (28387)                                         | 28387          | 28400                                                           | 28410                              | 28420                     | 28430           | 28440           | 28450    |             | 28469   |             |
| K12 Zwischenstück 255.328 - 290.948 (27917)     | -ATGCGGTGATCA  | CCCAAGCGGGGGGGCGCA                                              | AGGGCGCTCTGCC                      | GCTGA                     | ACCCG           | CAGATGCTG       | AAATCTCC | AGCGG       | CA      |             |
| SARS-CoV-2 Reference Genome NC_045512.2 (24291) | GAGTTACACA     | GAATGTTCTATAGAA                                                 | CAAAATTGAT                         | TGCCAACC                  | AATTTAATAG      | TGCTAT          | TGGCAA   | AATCA       | AGACTCA |             |
| Consensus (28387)                               | A              | A A C C                                                         | G G C A                            | TGCC                      | A               | TGCT            | TGG AA   | T C AG      | CA      |             |

Sars-CoV-2 & E.coli K12 Zwischenstück.epr.apr

|                                                 |       |       |       |       |       |       |       |       |       |             |
|-------------------------------------------------|-------|-------|-------|-------|-------|-------|-------|-------|-------|-------------|
|                                                 |       |       |       |       |       |       |       |       |       | Section 344 |
| (28470)                                         | 28470 | 28480 | 28490 | 28500 | 28510 | 28520 | 28530 | 28540 | 28552 |             |
| K12 Zwischenstück 255.328 - 290.948 (27998)     | ACC   | TG    | TTC   | GG    | CA    | TG    | AC    | G     | CA    | ---         |
| SARS-CoV-2 Reference Genome NC_045512.2 (24374) | CTT   | TC    | TTC   | CA    | CA    | GA    | AG    | TG    | CA    | CTT         |
| Consensus (28470)                               | T     | TTC   | CA    | A     | G     | CA    | G     | A     | C     | A           |
|                                                 |       |       |       |       |       |       |       |       |       | Section 345 |
| (28553)                                         | 28553 | 28560 | 28570 | 28580 | 28590 | 28600 | 28610 | 28620 | 28635 |             |
| K12 Zwischenstück 255.328 - 290.948 (28070)     | --    | TTA   | T     | CGG   | CA    | CT    | CAG   | GG    | CG    | G           |
| SARS-CoV-2 Reference Genome NC_045512.2 (24457) | AC    | TTA   | G     | CTC   | CA    | AT    | TTT   | GG    | TG    | CA          |
| Consensus (28553)                               |       | TTA   | C     | CA    | T     |       | GG    | G     | AT    | C           |
|                                                 |       |       |       |       |       |       |       |       |       | Section 346 |
| (28636)                                         | 28636 | 28650 | 28660 | 28670 | 28680 | 28690 | 28700 | 28718 |       |             |
| K12 Zwischenstück 255.328 - 290.948 (28148)     | TC    | GG    | CA    | TG    | CA    | GAT   | G     | CAGGC | GG    | CGGCG       |
| SARS-CoV-2 Reference Genome NC_045512.2 (24540) | TT    | GAT   | AG    | TT    | GAT   | CA    | CAGGC | AG    | ACTTC | AA          |
| Consensus (28636)                               | T     | G     | A     | G     | GAT   |       | CAGGC | G     |       | AA          |
|                                                 |       |       |       |       |       |       |       |       |       | Section 347 |
| (28719)                                         | 28719 | 28730 | 28740 | 28750 | 28760 | 28770 | 28780 | 28790 | 28801 |             |
| K12 Zwischenstück 255.328 - 290.948 (28230)     | CGA   | CG    | GGCG  | --    | CTC   | CG    | AG    | GGC   | CAC   | GC          |
| SARS-CoV-2 Reference Genome NC_045512.2 (24621) | CTT   | CT    | G     | CTAAT | CT    | TGG   | CT    | ACTA  | AA    | AT          |
| Consensus (28719)                               | C     | C     | G     |       | CT    | GC    | G     |       | A     | GT          |
|                                                 |       |       |       |       |       |       |       |       |       | Section 348 |
| (28802)                                         | 28802 | 28810 | 28820 | 28830 | 28840 | 28850 | 28860 | 28870 | 28884 |             |
| K12 Zwischenstück 255.328 - 290.948 (28311)     | GATC  | CGC   | TC    | --    | CCT   | G     | CG    | GA    | GC    | GG          |
| SARS-CoV-2 Reference Genome NC_045512.2 (24704) | CATC  | TTA   | TGT   | CCT   | TC    | CT    | CA    | GT    | AG    | CACCT       |
| Consensus (28802)                               | ATC   | T     | CCT   | CC    | C     | G     | C     | G     | T     | AT          |
|                                                 |       |       |       |       |       |       |       |       |       | Section 349 |
| (28885)                                         | 28885 | 28890 | 28900 | 28910 | 28920 | 28930 | 28940 | 28950 | 28967 |             |
| K12 Zwischenstück 255.328 - 290.948 (28393)     | GC    | CGC   | GA    | TGC   | AC    | GA    | CT    | GC    | GG    | ACT         |
| SARS-CoV-2 Reference Genome NC_045512.2 (24771) | CA    | CAA   | GA    | AA    | GA    | AG    | TT    | CA    | GA    | ACT         |
| Consensus (28885)                               | C     | GA    | A     | AC    | T     | C     | ACT   | TC    | TGCC  | G           |
|                                                 |       |       |       |       |       |       |       |       |       | Section 350 |
| (28968)                                         | 28968 | 28980 | 28990 | 29000 | 29010 | 29020 | 29030 | 29040 | 29050 |             |
| K12 Zwischenstück 255.328 - 290.948 (28476)     | G     | C     | A     | CCAT  | CGG   | C     | G     | G     | TTTT  | CGCCA       |
| SARS-CoV-2 Reference Genome NC_045512.2 (24851) | T     | CAA   | TGG   | CACA  | CA    | TG    | TTTT  | GTAAC | AC    | AA          |
| Consensus (28968)                               | CA    | A     |       | C     | C     | G     | TTTT  | AC    | A     | G           |

Sars-CoV-2 & E.coli K12 Zwischenstückeaapr.apr

|                                                 |                                                                                        |                                                |       |       |       |       |       |       |       |             |
|-------------------------------------------------|----------------------------------------------------------------------------------------|------------------------------------------------|-------|-------|-------|-------|-------|-------|-------|-------------|
|                                                 |                                                                                        |                                                |       |       |       |       |       |       |       | Section 351 |
| (29051)                                         | 29051                                                                                  | 29060                                          | 29070 | 29080 | 29090 | 29100 | 29110 | 29120 | 29133 |             |
| K12 Zwischenstück 255.328 - 290.948 (28559)     | CGGGGGGGGGTGTCAAGTTCCTCGGCACGGCGGGCACC                                                 | TGCGAGGTGGTTCGCGGAGGCGCTGGGTCTGGCGCTGCCGCACTCC |       |       |       |       |       |       |       |             |
| SARS-CoV-2 Reference Genome NC_045512.2 (24912) | CAGACAAACACATTGTGT--CTGGTAACGTGTATGTTGTAAATAGGAATTGTCAACAAACACAGTTTATGATCTTT--GCAACCT  |                                                |       |       |       |       |       |       |       |             |
| Consensus (29051)                               | C G C C T T GT CT G AC G G T AGG T C C C G T TG CT GCA C                               |                                                |       |       |       |       |       |       |       |             |
|                                                 |                                                                                        |                                                |       |       |       |       |       |       |       | Section 352 |
| (29134)                                         | 29134                                                                                  | 29140                                          | 29150 | 29160 | 29170 | 29180 | 29190 | 29200 | 29216 |             |
| K12 Zwischenstück 255.328 - 290.948 (28642)     | GCGCTGCGCGCTCCGGGCAGGCGGTGTGGCTGGAGATCGCCCCGCCAGTCGGCGCGCGCGGTGAGCGAGCTGGATAGCCGCGG    |                                                |       |       |       |       |       |       |       |             |
| SARS-CoV-2 Reference Genome NC_045512.2 (24992) | GAATTAGACTCATTCAGGAGGAGTTA--GATAAATATTTTAAG--AATCATAACATCAC---CAG--ATGTTGATTTAGGTGA    |                                                |       |       |       |       |       |       |       |             |
| Consensus (29134)                               | G T G C T C G AGG G T G T A AT G A TC C C CAG A T GAT G G                              |                                                |       |       |       |       |       |       |       |             |
|                                                 |                                                                                        |                                                |       |       |       |       |       |       |       | Section 353 |
| (29217)                                         | 29217                                                                                  | 29230                                          | 29240 | 29250 | 29260 | 29270 | 29280 | 29299 |       |             |
| K12 Zwischenstück 255.328 - 290.948 (28725)     | CATCACACGCGGGATATCTCTCCGATAAAGCCATCGAAAAACCGATGGTGATCCACGCGGCGGTTCGGCGGCTCCACC AATT    |                                                |       |       |       |       |       |       |       |             |
| SARS-CoV-2 Reference Genome NC_045512.2 (25066) | CATCTCTG--GCATTA--ATGCT--TCAGTTGTAAAACATTCAAAAAGAAATTGACCGCCCAATGAGGTTG-----CCAAG AATT |                                                |       |       |       |       |       |       |       |             |
| Consensus (29217)                               | CATC C GC A AT CT TC G T A CAT AAAA G AT G CC C G G T G CCA AATT                       |                                                |       |       |       |       |       |       |       |             |
|                                                 |                                                                                        |                                                |       |       |       |       |       |       |       | Section 354 |
| (29300)                                         | 29300                                                                                  | 29310                                          | 29320 | 29330 | 29340 | 29350 | 29360 | 29370 | 29382 |             |
| K12 Zwischenstück 255.328 - 290.948 (28808)     | TACTGCTGCAACATTCGGGCATCGGCCACGCGGCGGGGCTGCACGATCCCGGACGTTGAGCACTGGACGCGCATCAACC GTAAA  |                                                |       |       |       |       |       |       |       |             |
| SARS-CoV-2 Reference Genome NC_045512.2 (25140) | TAAA--TGAACTCTCATCGATCTCCAAGAACTTGGAAAGTATGAGC---AGTATATAAAATGGCCATGTGTAATTTGCTA       |                                                |       |       |       |       |       |       |       |             |
| Consensus (29300)                               | TA TG A T C C ATC CC A GG G A GA C A T A TGG C G CA G A                                |                                                |       |       |       |       |       |       |       |             |
|                                                 |                                                                                        |                                                |       |       |       |       |       |       |       | Section 355 |
| (29383)                                         | 29383                                                                                  | 29390                                          | 29400 | 29410 | 29420 | 29430 | 29440 | 29450 | 29465 |             |
| K12 Zwischenstück 255.328 - 290.948 (28891)     | GTGCCGCGTCTGGTGAAGGTGCTGCACACGGGCCGGACTATCACCCGACCGTGGCGGCCTTCTCGCGGCGGGCGGTGCGGA      |                                                |       |       |       |       |       |       |       |             |
| SARS-CoV-2 Reference Genome NC_045512.2 (25217) | GGTTT---TATAGCTGGCTTGATTGCCATAGTAATGGT-----GACAAATTAT--GCTTTGCTGTATGACCAAGTTGCTGTA     |                                                |       |       |       |       |       |       |       |             |
| Consensus (29383)                               | G T T G GC TG T CCA G GG GAC T GC TT CT G C TGC G A                                    |                                                |       |       |       |       |       |       |       |             |
|                                                 |                                                                                        |                                                |       |       |       |       |       |       |       | Section 356 |
| (29466)                                         | 29466                                                                                  | 29480                                          | 29490 | 29500 | 29510 | 29520 | 29530 | 29548 |       |             |
| K12 Zwischenstück 255.328 - 290.948 (28974)     | GGTGATGCTCCACCTGCGCGACCTCGGCGTGTGTCATCTGGACGCCATGACCGTGACCGGCAGACGGTGGCGAGAACCTTG      |                                                |       |       |       |       |       |       |       |             |
| SARS-CoV-2 Reference Genome NC_045512.2 (25287) | GTGT--CTCAA-----GGGCTGTGTTCTTGTGTGATCTGCTGCAAAATTTGATGAA--GAC--GACTCTGAGCAGTGC--TC     |                                                |       |       |       |       |       |       |       |             |
| Consensus (29466)                               | G TG CTC A G G T G CT TG ATC G GC A TGA G C GAC TG GC AG C T                           |                                                |       |       |       |       |       |       |       |             |
|                                                 |                                                                                        |                                                |       |       |       |       |       |       |       | Section 357 |
| (29549)                                         | 29549                                                                                  | 29560                                          | 29570 | 29580 | 29590 | 29600 | 29610 | 29620 | 29631 |             |
| K12 Zwischenstück 255.328 - 290.948 (29057)     | AATGGTGGCAGGCGTCCGAGCGCGGG--CGCGCTTCCGCCAGTGGCTTGCAGAGCAGGACGGCGTAGAGCCGGATGACGTGAT    |                                                |       |       |       |       |       |       |       |             |
| SARS-CoV-2 Reference Genome NC_045512.2 (25358) | AAAGGAGTCAAAATTAATTAAGATAAAAGAACTTATGATTGTTTATGAGAAATCTTACAAATTGGAACGTGAACCTTTGAA      |                                                |       |       |       |       |       |       |       |             |
| Consensus (29549)                               | AA GG G CA C C C CG CTT G TG T G GA T GA C G A A                                       |                                                |       |       |       |       |       |       |       |             |

Sars-CoV-2 & E.coli K12 Zwischenstück: apr.apr

|                                                 |                                                                                        |                     |                      |            |            |                    |                 |          |       |             |
|-------------------------------------------------|----------------------------------------------------------------------------------------|---------------------|----------------------|------------|------------|--------------------|-----------------|----------|-------|-------------|
|                                                 |                                                                                        |                     |                      |            |            |                    |                 |          |       | Section 358 |
| (29632)                                         | 29632                                                                                  | 29640               | 29650                | 29660      | 29670      | 29680              | 29690           | 29700    | 29714 |             |
| K12 Zwischenstück 255.328 - 290.948 (29139)     | CCTGCCGCGG--AGAAAGGCAAAAGGAAAGGGCTGACCTCGACGGTCTGCTTCCCGACGGGCAACATCGCTCCGGAAGGTTC     |                     |                      |            |            |                    |                 |          |       |             |
| SARS-CoV-2 Reference Genome NC_045512.2 (25441) | CAAGGTGAAATCAAGGATGCTACTCTTTCAGATTGTGT-TCGCGCTACTGCAACGATACGATACAAGC-CTCCTACTCCCTTTC   |                     |                      |            |            |                    |                 |          |       |             |
| Consensus (29632)                               | C G G                                                                                  | AG A GC A           | C AG T               | TCG        | CTGC       | C                  | AC G A A C      | CTC      | TTC   |             |
|                                                 |                                                                                        |                     |                      |            |            |                    |                 |          |       | Section 359 |
| (29715)                                         | 29715                                                                                  | 29720               | 29730                | 29740      | 29750      | 29760              | 29770           | 29780    | 29797 |             |
| K12 Zwischenstück 255.328 - 290.948 (29139)     | GGTGATCAAGGCCACGGCGATCGACCGGTCTGGTGGTGGGCGAGAAGTGGCTATACCAACACACCGGCCGGGTGCGGGTGTGTTTG |                     |                      |            |            |                    |                 |          |       |             |
| SARS-CoV-2 Reference Genome NC_045512.2 (25522) | GGATGGCTTATTGTGGCGTTGCACCTTCTGCTGTTTTTC--AGAGCGCTTCCAAAATCATAACCCCTCAAAAAGAGATGCGCAA   |                     |                      |            |            |                    |                 |          |       |             |
| Consensus (29715)                               | GG C                                                                                   | GGCG T              | AC T G TG T          | C AGA GC T | A A CA A C | C                  | G TG            | TTTG     |       |             |
|                                                 |                                                                                        |                     |                      |            |            |                    |                 |          |       | Section 360 |
| (29798)                                         | 29798                                                                                  | 29810               | 29820                | 29830      | 29840      | 29850              | 29860           | 29870    | 29880 |             |
| K12 Zwischenstück 255.328 - 290.948 (29303)     | TCTCGAAGCGG---AGGCGATCAAGGCGATCAAGCGGGAAGAGATTGTGCAGGCGGATATCATGGTGGTGTATCGGCGGCGGG    |                     |                      |            |            |                    |                 |          |       |             |
| SARS-CoV-2 Reference Genome NC_045512.2 (25603) | -CTAGCACTCTCAAGGGTGTTCACCTTTGTTT-----GCAACTTGCTGTGTGTTGTTTGTACAGTTTACTCA-CACCTTTTTC    |                     |                      |            |            |                    |                 |          |       |             |
| Consensus (29798)                               | CT G A C C                                                                             | GG G TCA            | G T                  | G AA       | TGT        | G                  | TA CA T T A C C | G        |       |             |
|                                                 |                                                                                        |                     |                      |            |            |                    |                 |          |       | Section 361 |
| (29881)                                         | 29881                                                                                  | 29890               | 29900                | 29910      | 29920      | 29930              | 29940           | 29950    | 29963 |             |
| K12 Zwischenstück 255.328 - 290.948 (29383)     | CCGTCCGCAACGGGATGGAAGAGACCTACAGCTCACCCTCCGCGCTAAAGCATATCTCTGTGGGCA-AGACGGTGTCT-GCTC    |                     |                      |            |            |                    |                 |          |       |             |
| SARS-CoV-2 Reference Genome NC_045512.2 (25679) | TGGTT-GCTGCTGGGCTTGAAGCCCTTTCTCTATCTTTATGCTTTAGTCTACTTCTTGCAGAGTATAAACCTTGTAAAGAAAT    |                     |                      |            |            |                    |                 |          |       |             |
| Consensus (29881)                               | CGT G C GGC T GAAG C T C                                                               |                     |                      |            | T GC TA    | A TCT G G G A A AC | TGT G           |          |       |             |
|                                                 |                                                                                        |                     |                      |            |            |                    |                 |          |       | Section 362 |
| (29964)                                         | 29964                                                                                  | 29970               | 29980                | 29990      | 30000      | 30010              | 30020           | 30030    | 30046 |             |
| K12 Zwischenstück 255.328 - 290.948 (29464)     | ATCACCGATGCG--CGCTTCTG-GGCGGTGCTG--ACGGGCGCTGCTTCCGCCACGTGTGCGCGGAGGCGCTGGCGGGCGGG     |                     |                      |            |            |                    |                 |          |       |             |
| SARS-CoV-2 Reference Genome NC_045512.2 (25761) | AATAATGAGGCTTTGGCTTGTGGAAATGCGGTTCAAAAAACCATTACTTTATGATGCGCAACTATTTTCTTTGCTGGCATA      |                     |                      |            |            |                    |                 |          |       |             |
| Consensus (29964)                               | A A GA GC                                                                              | GCTT C GG           | TG CG C              | CC         | T C        | TG C C             |                 | T GC GGC |       |             |
|                                                 |                                                                                        |                     |                      |            |            |                    |                 |          |       | Section 363 |
| (30047)                                         | 30047                                                                                  | 30060               | 30070                | 30080      | 30090      | 30100              | 30110           | 30129    |       |             |
| K12 Zwischenstück 255.328 - 290.948 (29542)     | CCGATTGGAAG-CTGCGCGATAAG-ACAATCATCGAGATTGCGGTGGATCGTCTGACGTTAACTGG-----CAGCGTGAAC      |                     |                      |            |            |                    |                 |          |       |             |
| SARS-CoV-2 Reference Genome NC_045512.2 (25844) | CTAATTGTTACGACTATTGTATACCTTACAATAGTGTAACCTCT-TCAATTGTCATTACTTCAGGTGATGGCAACAAGTCC      |                     |                      |            |            |                    |                 |          |       |             |
| Consensus (30047)                               | C ATTG A G CT                                                                          | ATA C ACA A G A T C | T AT GTC T AC T A TG | CA C G C   |            |                    |                 |          |       |             |
|                                                 |                                                                                        |                     |                      |            |            |                    |                 |          |       | Section 364 |
| (30130)                                         | 30130                                                                                  | 30140               | 30150                | 30160      | 30170      | 30180              | 30190           | 30200    | 30212 |             |
| K12 Zwischenstück 255.328 - 290.948 (29617)     | TTCACTCGGCACCGCGGACAAACC-----CGCTGACGCGGGAAGAGGGCGCGCGCAGAGCTGGCG-CGGCGGCAGACGCACCCG   |                     |                      |            |            |                    |                 |          |       |             |
| SARS-CoV-2 Reference Genome NC_045512.2 (25926) | TATTCTGAAACAT--GACTACAGATTGGTGGTTATACCTGAAAATGGGAATCTGAGAGTAAAGACTGTGTTGTATTACACAG     |                     |                      |            |            |                    |                 |          |       |             |
| Consensus (30130)                               | T TC G AC                                                                              | GAC ACC             | G T A C G AA A GG    | C GAG      | G C G G    | A                  | C G             |          |       |             |

Sars-CoV-2 & E.coli K12 Zwischenstück.eapr.apr

|                                                 |  |  |             |       |       |       |       |       |       |       |       |       |    |    |     |     |     |     |     |    |     |     |   |    |      |     |      |      |      |    |      |    |    |    |     |    |     |     |     |     |     |    |    |   |   |   |   |   |   |   |   |   |
|-------------------------------------------------|--|--|-------------|-------|-------|-------|-------|-------|-------|-------|-------|-------|----|----|-----|-----|-----|-----|-----|----|-----|-----|---|----|------|-----|------|------|------|----|------|----|----|----|-----|----|-----|-----|-----|-----|-----|----|----|---|---|---|---|---|---|---|---|---|
|                                                 |  |  | Section 365 |       |       |       |       |       |       |       |       |       |    |    |     |     |     |     |     |    |     |     |   |    |      |     |      |      |      |    |      |    |    |    |     |    |     |     |     |     |     |    |    |   |   |   |   |   |   |   |   |   |
|                                                 |  |  | (30213)     | 30213 | 30220 | 30230 | 30240 | 30250 | 30260 | 30270 | 30280 | 30295 |    |    |     |     |     |     |     |    |     |     |   |    |      |     |      |      |      |    |      |    |    |    |     |    |     |     |     |     |     |    |    |   |   |   |   |   |   |   |   |   |
| K12 Zwischenstück 255.328 - 290.948 (29692)     |  |  | GAC         | CTG   | CAC   | GC    | C     | -     | AC    | G     | ACT   | TTTT  | GC | CG | GAC | GAC | AC  | C   | GGC | TG | T   | GGG | C | -  | GG   | C   | ACTG | CA   | GT   | CG | ---- | GT | G  | AG | CG  | CG | CAC | CT  |     |     |     |    |    |   |   |   |   |   |   |   |   |   |
| SARS-CoV-2 Reference Genome NC_045512.2 (26007) |  |  | TTA         | CTT   | CAC   | TT    | C     | AG    | AC    | T     | T     | ACCA  | GC | T  | G   | TAC | TCA | ACT | C   | AA | TG  | AG  | T | A  | G    | A   | C    | ACTG | GT   | GT | G    | A  | AC | AT | GT  | T  | AC  | CTT | CTT | CAT | CT  |    |    |   |   |   |   |   |   |   |   |   |
| Consensus (30213)                               |  |  |             | CT    | CAC   | C     |       | AC    | A     | T     |       | GC    | G  | AC |     | AC  | C   |     | TG  | G  |     | C   | G | C  | ACTG |     | GT   | G    |      |    | GT   | A  | C  |    | C   | CA | CT  |     |     |     |     |    |    |   |   |   |   |   |   |   |   |   |
|                                                 |  |  | Section 366 |       |       |       |       |       |       |       |       |       |    |    |     |     |     |     |     |    |     |     |   |    |      |     |      |      |      |    |      |    |    |    |     |    |     |     |     |     |     |    |    |   |   |   |   |   |   |   |   |   |
|                                                 |  |  | (30296)     | 30296 | 30310 | 30320 | 30330 | 30340 | 30350 | 30360 | 30378 |       |    |    |     |     |     |     |     |    |     |     |   |    |      |     |      |      |      |    |      |    |    |    |     |    |     |     |     |     |     |    |    |   |   |   |   |   |   |   |   |   |
| K12 Zwischenstück 255.328 - 290.948 (29768)     |  |  | GG          | AA    | AGG   | CTG   | T     | AT    | T     | ATGA  | C     | A     | C  | G  | A   | T   | A   | T   | C   | G  | A   | GGT | A | A  | T    | T   | A    | C    | G    | C  | G    | T  | A  | A  | A   | A  | A   | G   | C   | G   | C   | T  | A  | A | T | T | A | A |   |   |   |   |
| SARS-CoV-2 Reference Genome NC_045512.2 (26090) |  |  | AC          | AA    | T     | AAAA  | T     | G     | T     | T     | ATGA  | G     | C  | T  | G   | A   | G   | A   | A   | C  | A   | T   | G | T  | C    | A   | ---  | A    | A    | T  | T    | C  | A  | C  | A   | A  | T   | C   | G   | A   | T   | T  | A  | A | T | T | A | A |   |   |   |   |
| Consensus (30296)                               |  |  |             | AA    |       |       | T     | TT    |       | ATGA  |       | C     | GA |    | AA  |     | T   | TC  |     | A  |     | A   | A | T  | T    |     |      |      |      |    |      |    |    |    |     |    |     |     |     |     |     |    |    |   |   |   |   |   |   |   |   |   |
|                                                 |  |  | Section 367 |       |       |       |       |       |       |       |       |       |    |    |     |     |     |     |     |    |     |     |   |    |      |     |      |      |      |    |      |    |    |    |     |    |     |     |     |     |     |    |    |   |   |   |   |   |   |   |   |   |
|                                                 |  |  | (30379)     | 30379 | 30390 | 30400 | 30410 | 30420 | 30430 | 30440 | 30450 | 30461 |    |    |     |     |     |     |     |    |     |     |   |    |      |     |      |      |      |    |      |    |    |    |     |    |     |     |     |     |     |    |    |   |   |   |   |   |   |   |   |   |
| K12 Zwischenstück 255.328 - 290.948 (29851)     |  |  | G           | A     | G     | A     | T     | A     | A     | A     | C     | C     | G  | T  | C   | G   | A   | T   | A   | T  | T   | T   | C | C  | G    | A   | G    | G    | C    | T  | T    | G  | T  | T  | T   | T  | G   | A   | A   | T   | T   | A  | T  | A | A | T | A | A |   |   |   |   |
| SARS-CoV-2 Reference Genome NC_045512.2 (26168) |  |  | T           | A     | -     | A     | T     | G     | G     | A     | A     | C     | C  | A  | A   | T   | T   | A   | T   | G  | A   | T   | G | A  | T    | G   | A    | C    | C    | G  | A    | G  | A  | T  | T   | A  | A   | C   | A   | A   | T   | T  | A  | A | T | A | A |   |   |   |   |   |
| Consensus (30379)                               |  |  |             | A     | AT    |       | A     | ACC   |       | T     |       | GA    |    | A  |     |     | CG  |     | G   | AC |     | CT  |   | TG |      | TTT | G    | AA   |      |    |      |    |    | AA |     | T  | A   | A   | T   | G   |     | AT |    |   |   |   |   |   |   |   |   |   |
|                                                 |  |  | Section 368 |       |       |       |       |       |       |       |       |       |    |    |     |     |     |     |     |    |     |     |   |    |      |     |      |      |      |    |      |    |    |    |     |    |     |     |     |     |     |    |    |   |   |   |   |   |   |   |   |   |
|                                                 |  |  | (30462)     | 30462 | 30470 | 30480 | 30490 | 30500 | 30510 | 30520 | 30530 | 30544 |    |    |     |     |     |     |     |    |     |     |   |    |      |     |      |      |      |    |      |    |    |    |     |    |     |     |     |     |     |    |    |   |   |   |   |   |   |   |   |   |
| K12 Zwischenstück 255.328 - 290.948 (29934)     |  |  | T           | A     | -     | T     | C     | G     | T     | T     | G     | C     | G  | T  | C   | A   | A   | A   | A   | G  | C   | A   | A | A  | T    | A   | C    | G    | T    | A  | A    | T  | T  | G  | A   | A  | T   | A   | A   | A   | A   | A  | A  | A | A | A | A | A |   |   |   |   |
| SARS-CoV-2 Reference Genome NC_045512.2 (26248) |  |  | T           | A     | -     | T     | C     | G     | T     | T     | G     | C     | G  | T  | C   | A   | A   | A   | A   | G  | C   | A   | A | A  | T    | A   | C    | G    | T    | A  | A    | T  | T  | G  | A   | A  | T   | A   | A   | A   | A   | A  | A  | A | A | A | A |   |   |   |   |   |
| Consensus (30462)                               |  |  |             | TA    | TC    | TT    | G     |       | TC    |       | AA    | AG    |    | A  |     | TA  | CGT |     | A   | T  | G   |     | A | A  | T    | A   |      | C    | TT   | CT | G    |    | TT | T  | G   | AT |     |     |     |     |     |    |    |   |   |   |   |   |   |   |   |   |
|                                                 |  |  | Section 369 |       |       |       |       |       |       |       |       |       |    |    |     |     |     |     |     |    |     |     |   |    |      |     |      |      |      |    |      |    |    |    |     |    |     |     |     |     |     |    |    |   |   |   |   |   |   |   |   |   |
|                                                 |  |  | (30545)     | 30545 | 30550 | 30560 | 30570 | 30580 | 30590 | 30600 | 30610 | 30627 |    |    |     |     |     |     |     |    |     |     |   |    |      |     |      |      |      |    |      |    |    |    |     |    |     |     |     |     |     |    |    |   |   |   |   |   |   |   |   |   |
| K12 Zwischenstück 255.328 - 290.948 (30011)     |  |  | T           | T     | A     | C     | A     | C     | T     | -     | -     | C     | C  | A  | T   | A   | A   | C   | A   | G  | A   | T   | T | G  | T    | A   | A    | T    | T    | C  | T    | G  | A  | T  | G   | A  | C   | G   | A   | A   | T   | A  | A  | C |   |   |   |   |   |   |   |   |
| SARS-CoV-2 Reference Genome NC_045512.2 (26330) |  |  | T           | T     | A     | C     | A     | C     | T     | A     | G     | C     | C  | A  | T   | A   | A   | C   | A   | G  | A   | T   | T | G  | T    | A   | A    | T    | T    | C  | T    | G  | A  | T  | G   | A  | C   | G   | A   | A   | T   | A  | A  | C |   |   |   |   |   |   |   |   |
| Consensus (30545)                               |  |  |             | TT    | A     | C     | A     | C     | T     |       |       | CC    | A  | T  |     | AC  |     | G   | T   |    | ATT |     | G |    | T    | C   | TA   |      | G    | TG | A    | AT | TG | T  | ACG |    | A   | T   |     | C   | TG  | AA | AC |   |   |   |   |   |   |   |   |   |
|                                                 |  |  | Section 370 |       |       |       |       |       |       |       |       |       |    |    |     |     |     |     |     |    |     |     |   |    |      |     |      |      |      |    |      |    |    |    |     |    |     |     |     |     |     |    |    |   |   |   |   |   |   |   |   |   |
|                                                 |  |  | (30628)     | 30628 | 30640 | 30650 | 30660 | 30670 | 30680 | 30690 | 30700 | 30710 |    |    |     |     |     |     |     |    |     |     |   |    |      |     |      |      |      |    |      |    |    |    |     |    |     |     |     |     |     |    |    |   |   |   |   |   |   |   |   |   |
| K12 Zwischenstück 255.328 - 290.948 (30092)     |  |  | A           | A     | A     | A     | T     | T     | G     | C     | T     | A     | C  | G  | G   | C   | T   | G   | A   | G  | A   | C   | C | C  | G    | C   | T    | G    | A    | C  | C    | G  | T  | A  | A   | T  | T   | T   | C   | T   | A   | C  | A  | A | T | T | A | C | A |   |   |   |
| SARS-CoV-2 Reference Genome NC_045512.2 (26405) |  |  | C           | T     | T     | C     | T     | T     | -     | T     | A     | C     | G  | T  | T   | T   | A   | C   | T   | G  | T   | G   | T | T  | A    | A   | A    | A    | T    | C  | T    | G  | T  | T  | A   | A  | T   | C   | T   | G   | T   | T  | A  | C | T | A | C | A |   |   |   |   |
| Consensus (30628)                               |  |  |             | TT    |       | T     | ACG   |       |       | C     |       | T     | G  |    |     | A   |     | CTG |     |    |     | TT  |   | T  | C    | T   | G    |      | AG   |    | C    |    | G  | AT | T   | T  |     | T   | G   |     | CTA |    |    |   |   |   |   | A |   |   |   |   |
|                                                 |  |  | Section 371 |       |       |       |       |       |       |       |       |       |    |    |     |     |     |     |     |    |     |     |   |    |      |     |      |      |      |    |      |    |    |    |     |    |     |     |     |     |     |    |    |   |   |   |   |   |   |   |   |   |
|                                                 |  |  | (30711)     | 30711 | 30720 | 30730 | 30740 | 30750 | 30760 | 30770 | 30780 | 30793 |    |    |     |     |     |     |     |    |     |     |   |    |      |     |      |      |      |    |      |    |    |    |     |    |     |     |     |     |     |    |    |   |   |   |   |   |   |   |   |   |
| K12 Zwischenstück 255.328 - 290.948 (30171)     |  |  | C           | C     | G     | A     | C     | G     | T     | C     | T     | T     | C  | G  | C   | C   | G   | G   | A   | T  | T   | A   | T | G  | G    | C   | A    | C    | G    | C  | T    | G  | T  | C  | C   | C  | G   | C   | G   | T   | A   | C  | C  | G | A | C | C | G | T | G |   |   |
| SARS-CoV-2 Reference Genome NC_045512.2 (26473) |  |  | A           | C     | G     | A     | C     | T     | A     | A     | A     | T     | A  | T  | T   | A   | T   | T   | T   | C  | T   | G   | T | T  | G    | G   | A    | C    | T    | T  | A    | A  | T  | T  | A   | A  | T   | T   | A   | A   | T   | T  | A  | A | T | T | A | C | C | G | T | G |
| Consensus (30711)                               |  |  |             | CGA   |       | T     |       |       |       |       |       | T     | T  |    | G   |     |     |     | T   |    | T   | T   | G | G  | AC   |     | T    |      | TTTT | G  | C    |    |    |    |     |    |     |     |     |     |     |    |    |   |   |   |   |   |   |   |   |   |

Sars-CoV-2 & E.coli K12 Zwischenstück.eapr.apr

|                                                 |                   |                |              |              |                |             |           |                      |               |             |
|-------------------------------------------------|-------------------|----------------|--------------|--------------|----------------|-------------|-----------|----------------------|---------------|-------------|
|                                                 |                   |                |              |              |                |             |           |                      |               | Section 372 |
| (30794)                                         | 30794             | 30800          | 30810        | 30820        | 30830          | 30840       | 30850     | 30860                | 30876         |             |
| K12 Zwischenstück 255.328 - 290.948 (30254)     | ATGGGGCTG         | CTGGTAGACCGGAC | CCGACGCGG    | CACGCGG      | CCAGT          | TCCGCCCG    | TTCCT     | GCTGTGGGGGGCC        | ATCCGTTTGGCAT |             |
| SARS-CoV-2 Reference Genome NC_045512.2 (26554) | AAGAG             | CTTAAAGGCTC    | CTTGAAAC     | AATGGA       | CC             | TAGT        | TAAATAGGT | TTCCT                | ATTCCTTACAT   |             |
| Consensus (30794)                               | A G G             | CT A A C C C   | G A C        | G A          | CC             | T           | TTCCT     |                      | AT CC T C AT  |             |
|                                                 |                   |                |              |              |                |             |           |                      |               | Section 373 |
| (30877)                                         | 30877             | 30890          | 30900        | 30910        | 30920          | 30930       | 30940     | 30959                |               |             |
| K12 Zwischenstück 255.328 - 290.948 (30337)     | CGTCTGCGGTGCTGAC  | CTTCTACACGCGG  | GACTTCTTCGCG | ACAGG        | GCAAGAT        | TCACTTACGCC | TGCGTGACC | TACATTCTCCTGA        |               |             |
| SARS-CoV-2 Reference Genome NC_045512.2 (26614) | GGATT             | GTCTTCTACAA    | ATTTGCTAT    | GGCAACAGG    | AATAG          | TTTTT       | TGTATA    | TAATTAAGTATATTTCCTCT |               |             |
| Consensus (30877)                               | G T GT            | CTTCTACA       | G C T T C    | ACAGG        | AG T T T       | T           | T A       | TA ATT TCCT          |               |             |
|                                                 |                   |                |              |              |                |             |           |                      |               | Section 374 |
| (30960)                                         | 30960             | 30970          | 30980        | 30990        | 31000          | 31010       | 31020     | 31030                | 31042         |             |
| K12 Zwischenstück 255.328 - 290.948 (30420)     | CCCTGGTCTA        | CACTTCTGTTAAC  | GTGCGGTACT   | TGCGGCAT     | TGCGGGCG       | TATCACC     | CGGACCCG  | AAAGAG               | CGTCACGCC     |             |
| SARS-CoV-2 Reference Genome NC_045512.2 (26686) | GGCTGTTATGGC      | CAGTAAC        | CTTAGGCTG    | TTTGTGCT     | TGCTGT         | TTA         | CAGAAT    | AAATTG               | GATCACCGGT    |             |
| Consensus (30960)                               | CTG T T           | CA             | C TTA C TG   | T TG GC      | TGC G          | T A         | C GA      | AAA G                | TCAC          |             |
|                                                 |                   |                |              |              |                |             |           |                      |               | Section 375 |
| (31043)                                         | 31043             | 31050          | 31060        | 31070        | 31080          | 31090       | 31100     | 31110                | 31125         |             |
| K12 Zwischenstück 255.328 - 290.948 (30501)     | TGCAGTCTCTGG      | CGCTTCTTCT     | GTGGCGGCG    | CGGGCTCG     | CTCGCTA        | TCAGCGG     | CATCGCGC  | TGCGCTGGT            | GAGCATCATCG   |             |
| SARS-CoV-2 Reference Genome NC_045512.2 (26757) | GGAATTGCTAT       | CGCAATGG       | CTGTCTT      | GTA          | GGCTTGAT       | TGTTG       | TCAGCTACT | TCAT                 | TGCTTTTGCG    |             |
| Consensus (31043)                               | G A T CT          | CGC            | C TG C       | G GGCT G T   | TCAGC          | C TC        | TGC       | CT                   | GA T CG       |             |
|                                                 |                   |                |              |              |                |             |           |                      |               | Section 376 |
| (31126)                                         | 31126             | 31140          | 31150        | 31160        | 31170          | 31180       | 31190     | 31208                |               |             |
| K12 Zwischenstück 255.328 - 290.948 (30583)     | CAAAGGGGACGAGCA   | GGTGGGCTACT    | TGCGCGC      | ATGTGCGT     | GCTGGG         | GCTGAG      | CGGCTGG   | TGCTGC               | TCTACGTCTGCTT |             |
| SARS-CoV-2 Reference Genome NC_045512.2 (26836) | GTACGCGTTCCATGT   | GGTCATTCA      | ATCCAGAACTA  | ACATTCTT     | CTCAAC         | GTCGCACT    | TCATGGCA  | CTAT                 | TCTGACCAGACCG |             |
| Consensus (31126)                               | A G G C A         | GGT            | A T C G      | C A T C T    | G              | C C TGG     | CT        | TCT                  | C             |             |
|                                                 |                   |                |              |              |                |             |           |                      |               | Section 377 |
| (31209)                                         | 31209             | 31220          | 31230        | 31240        | 31250          | 31260       | 31270     | 31280                | 31291         |             |
| K12 Zwischenstück 255.328 - 290.948 (30664)     | CTTACAGACCA       | AAGAGCGCTAC    | ACTTTGAGGT   | GACGCGGGCTCG | TGCGTGG        | CGAAAG      | ACCTTAAGC | TGCTGGG              | CAACA         |             |
| SARS-CoV-2 Reference Genome NC_045512.2 (26919) | CTTCTAGA          | AAGTG          | ACTCGTAATC   | GGAGCTGTGAT  | CTTCTGG        | ACATCTT     | CGTAT     | TGCTGG               | CAACA         |             |
| Consensus (31209)                               | CTTC              | GA             | AAG G        | A CT A       | G AGC G G TC T | GTGG        | A A CTT   | T                    | TGCTGG CA CA  |             |
|                                                 |                   |                |              |              |                |             |           |                      |               | Section 378 |
| (31292)                                         | 31292             | 31300          | 31310        | 31320        | 31330          | 31340       | 31350     | 31360                | 31374         |             |
| K12 Zwischenstück 255.328 - 290.948 (30747)     | GCCAGTGGCGCATCATG | TGCGCGT        | TCAAGATGA    | TGGGACCTGCTC | CAACGT         | GGTGCGCGG   | CGGGGCG   | ACGCTCTACT           | TTCG          |             |
| SARS-CoV-2 Reference Genome NC_045512.2 (26987) | TCTAGGACGC        | TGTGACA        | TCAAG        | TGCTA        | AAGAAAT        | CACTGTGCT   | ATCA      | CGA                  | ACGCTTCTTATTA |             |
| Consensus (31292)                               | C AG G CGC        | TG G           | TCAAG        | TG C A       | CA             | GT G T C    | CG        | ACGCT T T T          |               |             |

Sars-CoV-2 & E.coli K12 Zwischenstück.eapr.apr

|                                                 |       |             |           |            |           |           |            |              |            |                |
|-------------------------------------------------|-------|-------------|-----------|------------|-----------|-----------|------------|--------------|------------|----------------|
|                                                 |       |             |           |            |           |           |            |              |            | Section 379    |
| (31375)                                         | 31375 | 31380       | 31390     | 31400      | 31410     | 31420     | 31430      | 31440        | 31457      |                |
| K12 Zwischenstück 255.328 - 290.948 (30828)     | TG    | AAATACGTGAT | TGGATCA   | CCGGAGTTGG | CAGCCAGT  | TTTTACTTT | ACGGCAGCCT | CGCCACCATGTT | CGGCTCGCTT | TGC            |
| SARS-CoV-2 Reference Genome NC_045512.2 (27059) | CA    | AAATGGGAGCT | TCGCAGGT  | GTAGCAGGT  | GACTCAGG  | TTTTCTGCT | GCATA-CAGT | CGCTACAGGAT  | TGGCAA     | CTATAAAATTA    |
| Consensus (31375)                               |       | AA T G G T  | C G AG    | GG GAC CAG | TTTT CT   | A         | CAG C C    | CA AT        | C CT       | T              |
|                                                 |       |             |           |            |           |           |            |              |            | Section 380    |
| (31458)                                         | 31458 | 31470       | 31480     | 31490      | 31500     | 31510     | 31520      | 31530        | 31540      |                |
| K12 Zwischenstück 255.328 - 290.948 (30911)     | TC    | CTCAGCG     | CGTGCTGG  | CCGGTTC    | GACCGCGT  | CAACGCGC  | TTCAAGTG   | GATCAT       | TCGTCC     | GCTGCTGAT      |
| SARS-CoV-2 Reference Genome NC_045512.2 (27141) | AA    | CACAGAC     | CCATTCCAG | TAGCAGT    | GACAAATAT | TGC-----  | TTTGCTTG   | TACAGT       | TAAGTG     | CAACAGATGTTTCA |
| Consensus (31458)                               |       | C CA CC     | G GC      | GAC        | T C       | TT        | TG A       | T            | G C AC     | TCA C G TGA    |
|                                                 |       |             |           |            |           |           |            |              |            | Section 381    |
| (31541)                                         | 31541 | 31550       | 31560     | 31570      | 31580     | 31590     | 31600      | 31610        | 31623      |                |
| K12 Zwischenstück 255.328 - 290.948 (30994)     | TTTC  | --GT        | CACCCCG   | GGGAGC     | ACATCG    | GCTCAT    | TTTGTG     | CCCTCA       | ACATCCTG   | TTCC           |
| SARS-CoV-2 Reference Genome NC_045512.2 (27220) | TTTC  | AGGT        | TACTATA   | GCAGAG     | -ATAT     | TACTAATTA | TTATG      | AGGAC        | TTTTAAAGT  | TTCC           |
| Consensus (31541)                               | TTTC  | GT AC       | GC GAG A  | AT C       | TT TG     | C         | TTCC       | TT G         | T TT AT    | CA CA          |
|                                                 |       |             |           |            |           |           |            |              |            | Section 382    |
| (31624)                                         | 31624 | 31630       | 31640     | 31650      | 31660     | 31670     | 31680      | 31690        | 31706      |                |
| K12 Zwischenstück 255.328 - 290.948 (31074)     | CG    | CTGCAG      | TGGCTG    | ATGGCT     | TTCTG     | -ACGT     | GGTGG      | ACTAC        | GAGGAG     | AGCCG          |
| SARS-CoV-2 Reference Genome NC_045512.2 (27302) | AC    | CT-CA       | -TAATTA   | AAAAAT     | TTATCT    | AAAGT     | CACATA     | ACTGA        | GAATAA     | TATTTCAAT      |
| Consensus (31624)                               |       | CT CA T     | T A       | TT T       | A GT      | ACT       | GA A A     | C            | T G G      | A G GC         |
|                                                 |       |             |           |            |           |           |            |              |            | Section 383    |
| (31707)                                         | 31707 | 31720       | 31730     | 31740      | 31750     | 31760     | 31770      | 31789        |            |                |
| K12 Zwischenstück 255.328 - 290.948 (31156)     | C     | ACCTAC      | CTGTTC    | AGCCT      | GAAGATT   | GGCCT     | GGCGAT     | TGGCGG       | GGCGG      | TGGTGGG        |
| SARS-CoV-2 Reference Genome NC_045512.2 (27378) | G     | ATTGAT      | TAAACG    | AACTGA     | GAAGATT   | ATTCT     | -----      | TTTCTT       | GGCAC      | TGATAACA       |
| Consensus (31707)                               | A     | A           | A C       | TGAA       | ATT       | CT        | T          | C            | GGC        | TG T           |
|                                                 |       |             |           |            |           |           |            |              |            | Section 384    |
| (31790)                                         | 31790 | 31800       | 31810     | 31820      | 31830     | 31840     | 31850      | 31860        | 31872      |                |
| K12 Zwischenstück 255.328 - 290.948 (31238)     | G     | CCAGCA      | GCAGCG    | TGCAG      | CCGGTT    | GAGGT     | GCT-CA     | CCACCAT      | CAAAA      | TTCTGTT        |
| SARS-CoV-2 Reference Genome NC_045512.2 (27449) | A     | CTACCA      | AGAGTGT   | T-----     | TAGAGGT   | ACAA      | CAGTAC     | TTT          | TTAAAA     | GAACCTT        |
| Consensus (31790)                               |       | C A CA      | AG GTG    | T          | GAGGT C   | CA        | AC         | T AAAA       | TT         | C T            |
|                                                 |       |             |           |            |           |           |            |              |            | Section 385    |
| (31873)                                         | 31873 | 31880       | 31890     | 31900      | 31910     | 31920     | 31930      | 31940        | 31955      |                |
| K12 Zwischenstück 255.328 - 290.948 (31320)     | GCA   | TGTTCA      | TGCTG     | TCGCTCTA   | CAAGCT    | TCACCG    | ATGCC      | CGCGTG       | GAGGC      | CATCAGC        |
| SARS-CoV-2 Reference Genome NC_045512.2 (27518) | GCA   | A-TTCA      | CCATTTCA  | TC-CTCTA   | GCTGATA   | ACAAAT    | TTTGAC     | -TGACTTG     | CTTTAGC    | ACTCAAT        |
| Consensus (31873)                               | GCA   | TTCA        | CAT       | TC CTCTA   | G T AC    | AT        | C C TG     | C T AGC      | CA         | T G TT         |



Sars-CoV-2 & E.coli K12 Zwischenstück: apr.apr

|                                                 |                                                                                        |       |       |       |       |       |       |       |       |             |
|-------------------------------------------------|----------------------------------------------------------------------------------------|-------|-------|-------|-------|-------|-------|-------|-------|-------------|
|                                                 |                                                                                        |       |       |       |       |       |       |       |       | Section 386 |
| (31956)                                         | 31956                                                                                  | 31970 | 31980 | 31990 | 32000 | 32010 | 32020 |       |       | 32038       |
| K12 Zwischenstück 255.328 - 290.948 (31399)     | CGCGGCGCAGGGCGAGGCGCTTCCCGACGCGGACAGCGGCATCCCATTAACCGG-----AGGCAATATGGAATACTCACTAAC    |       |       |       |       |       |       |       |       |             |
| SARS-CoV-2 Reference Genome NC_045512.2 (27598) | GA CGGCGTAAAAACAGCTCTACAGTTACGT-GCAGATCAGTTTCACCTAAACGTGTTTCATCAGACAAAGAGGAAGTTCAGAAC  |       |       |       |       |       |       |       |       |             |
| Consensus (31956)                               | CGGCGCA C G C T ACG GC A A C G TC C T AAC G AG CAA A G A TCA AAC                       |       |       |       |       |       |       |       |       |             |
|                                                 |                                                                                        |       |       |       |       |       |       |       |       | Section 387 |
| (32039)                                         | 32039                                                                                  | 32050 | 32060 | 32070 | 32080 | 32090 | 32100 | 32110 | 32121 |             |
| K12 Zwischenstück 255.328 - 290.948 (31477)     | CCGATACTGCAACGGGCTTCAACCCGGACCGTCCCTGTGCGCAGGCGAGGACTACTACATCGCCACCTCGACCTTCGAGTG      |       |       |       |       |       |       |       |       |             |
| SARS-CoV-2 Reference Genome NC_045512.2 (27680) | TT--TACTGTCGAATTTT-----CTTATTGTTGCGCAATAGTGTTTATAAC-ACCTTGCTTC----ACACTCAAAAG          |       |       |       |       |       |       |       |       |             |
| Consensus (32039)                               | TACTC CC TT C T TGC GC A G G A AC AC T GC C AC TC A G                                  |       |       |       |       |       |       |       |       |             |
|                                                 |                                                                                        |       |       |       |       |       |       |       |       | Section 388 |
| (32122)                                         | 32122                                                                                  | 32130 | 32140 | 32150 | 32160 | 32170 | 32180 | 32190 | 32204 |             |
| K12 Zwischenstück 255.328 - 290.948 (31560)     | GTTCCCGGCGGTGCGCATCTACCACTCCCGTGACCTGAAAAAACGGTCTGCTGGTTCAGCACCCCGTTGGACCCGCGTGTTCGATG |       |       |       |       |       |       |       |       |             |
| SARS-CoV-2 Reference Genome NC_045512.2 (27747) | AAAGACAGAAATGATTGAACCTTTCTAATAAT-TGACCTCTAT--TTGT-GCTTTTTCAGCTTTCTGCTATTCCCTTGTTCATAT  |       |       |       |       |       |       |       |       |             |
| Consensus (32122)                               | C G A CT CA T TGAC T A T GT GCT T AGC C G T CC GT T AT                                 |       |       |       |       |       |       |       |       |             |
|                                                 |                                                                                        |       |       |       |       |       |       |       |       | Section 389 |
| (32205)                                         | 32205                                                                                  | 32210 | 32220 | 32230 | 32240 | 32250 | 32260 | 32270 | 32287 |             |
| K12 Zwischenstück 255.328 - 290.948 (31642)     | CTGGACATGAAGGGCAACCCGGAAGCTCGGCGGCAATCTGGGGCGCCGTGCTGAGCTACGCCGACGGTAAATTCGGCTGCTCTA   |       |       |       |       |       |       |       |       |             |
| SARS-CoV-2 Reference Genome NC_045512.2 (27825) | ATGCTTATATAT---CTTTTGTTCTC-----ACTTGAACT---TGCAAGATC-----ATAATGAACTTGTACGCTA           |       |       |       |       |       |       |       |       |             |
| Consensus (32205)                               | TG AT A C G CTC A TG C TGC GA C A T AA TG C CTA                                        |       |       |       |       |       |       |       |       |             |
|                                                 |                                                                                        |       |       |       |       |       |       |       |       | Section 390 |
| (32288)                                         | 32288                                                                                  | 32300 | 32310 | 32320 | 32330 | 32340 | 32350 | 32360 | 32370 |             |
| K12 Zwischenstück 255.328 - 290.948 (31725)     | CACCGACGTGAAGATTGTTCGACTCGCGGTGGAAACCGGCGCAACTTCCTCGTCAACCGCGCCCTCCATCGAGGGGCAATGGA    |       |       |       |       |       |       |       |       |             |
| SARS-CoV-2 Reference Genome NC_045512.2 (27887) | AACGAAACATGAATTTCTTGTTTCTTCTAGGAATCAT---CACAACTGTAGCTGCATTTTACCAAGAATGTAGTTTACAGTCA    |       |       |       |       |       |       |       |       |             |
| Consensus (32288)                               | AC AC TGAA TT T G T C GGAA A C CAACT C CA C CC AT AG CA A                              |       |       |       |       |       |       |       |       |             |
|                                                 |                                                                                        |       |       |       |       |       |       |       |       | Section 391 |
| (32371)                                         | 32371                                                                                  | 32380 | 32390 | 32400 | 32410 | 32420 | 32430 | 32440 | 32453 |             |
| K12 Zwischenstück 255.328 - 290.948 (31808)     | GCGAGCCAATCCGATGGGCAACGGCGGGTTTGACCCGTCCTGTTTCACGACGACGATGGCCGCAAATACATATCTACCGC       |       |       |       |       |       |       |       |       |             |
| SARS-CoV-2 Reference Genome NC_045512.2 (27966) | TGTACTCAACATCAACCAT--ATGTAGTTGATGACCCGTCCTATTTCACCTTCTATTCT-----AAATGGTATAT-----       |       |       |       |       |       |       |       |       |             |
| Consensus (32371)                               | A CAA C A A G G TGACCCGT C T CAC C A T AAAT TATAT                                      |       |       |       |       |       |       |       |       |             |
|                                                 |                                                                                        |       |       |       |       |       |       |       |       | Section 392 |
| (32454)                                         | 32454                                                                                  | 32460 | 32470 | 32480 | 32490 | 32500 | 32510 | 32520 | 32536 |             |
| K12 Zwischenstück 255.328 - 290.948 (31891)     | CCGTGGGGGCCGCGCAACCAAGCAACCGGCACAAACACCATCTGTGT-TACAGGCGTTTGACCCGCGAGACCGGCAAGCTCTCGC  |       |       |       |       |       |       |       |       |             |
| SARS-CoV-2 Reference Genome NC_045512.2 (28034) | ---TAGAGTAGAGGCTAGAAATCAGGAGCTTTAAATTGATTTGTGCGTGGATGAGGCTGGTTCTAAATCACCATTTCAGTACA    |       |       |       |       |       |       |       |       |             |
| Consensus (32454)                               | T G G G GC A A A CA C C AA AT GTG T A G G TG C A C CA C T                              |       |       |       |       |       |       |       |       |             |



Sars-CoV-2 & E.coli K12 Zwischenstückapr.apr

|                                                 |         |       |             |       |       |       |       |       |       |         |      |      |
|-------------------------------------------------|---------|-------|-------------|-------|-------|-------|-------|-------|-------|---------|------|------|
|                                                 |         |       | Section 393 |       |       |       |       |       |       |         |      |      |
|                                                 | (32537) | 32537 | 32550       | 32560 | 32570 | 32580 | 32590 | 32600 | 32619 |         |      |      |
| K12 Zwischenstück 255.328 - 290.948 (31973)     | C       | CGA   | GCG         | CAAA  | ACGCT | GT    | TTA   | CCGG  | CAC   | CCGCT   | CT   | GC   |
| SARS-CoV-2 Reference Genome NC_045512.2 (28114) | T       | CGA   | TAT         | CGGT  | AAT   | TAT   | TAC   | AGTTT | CT    | GTTTAC  | CT   | TT   |
| Consensus (32537)                               |         | C     | G           | A     | T     | T     | A     | C     | G     | CT      | TACA | AA   |
|                                                 |         |       | Section 394 |       |       |       |       |       |       |         |      |      |
|                                                 | (32620) | 32620 | 32630       | 32640 | 32650 | 32660 | 32670 | 32680 | 32690 | 32702   |      |      |
| K12 Zwischenstück 255.328 - 290.948 (32054)     | A       | CT    | GAT         | TGG   | CCGC  | GG    | AGG   | GGC   | GG    | ACCAGCT | AC   | AG   |
| SARS-CoV-2 Reference Genome NC_045512.2 (28193) | G       | CG    | TTG         | TT    | CGTT  | TAT   | GAA   | GAC   | TTTTT | TAG     | AGT  | AT   |
| Consensus (32620)                               |         | C     | T           | T     | C     | C     | A     | G     | G     | C       | A    | A    |
|                                                 |         |       | Section 395 |       |       |       |       |       |       |         |      |      |
|                                                 | (32703) | 32703 | 32710       | 32720 | 32730 | 32740 | 32750 | 32760 | 32770 | 32785   |      |      |
| K12 Zwischenstück 255.328 - 290.948 (32134)     | G       | AG    | CTG         | CACCC | GGAC  | GTAA  | GAT   | GAT   | AC    | AGCTG   | GC   | ACC  |
| SARS-CoV-2 Reference Genome NC_045512.2 (28275) | T       | GT    | CTG         | ATAAT | GGAC  | C---  | CAAA  | AT    | CAG   | GAAAT   | GC   | ACC  |
| Consensus (32703)                               |         |       | CTG         |       | GGAC  | C     | A     | AT    | A     | C       | GC   | ACC  |
|                                                 |         |       | Section 396 |       |       |       |       |       |       |         |      |      |
|                                                 | (32786) | 32786 | 32800       | 32810 | 32820 | 32830 | 32840 | 32850 | 32868 |         |      |      |
| K12 Zwischenstück 255.328 - 290.948 (32217)     | G       | C     | AGACG       | CA    | TAC   | GGT   | GAA   | TGT   | TACAT | GGC     | CT   | ACC  |
| SARS-CoV-2 Reference Genome NC_045512.2 (28353) | A       | C     | ---         | CA    | GAA   | AT    | GG    | GAA   | CG    | CAGTGG  | GGC  | GG   |
| Consensus (32786)                               |         | C     |             | CA    | A     | GG    | GAA   | G     |       | GGC     | C    | A    |
|                                                 |         |       | Section 397 |       |       |       |       |       |       |         |      |      |
|                                                 | (32869) | 32869 | 32880       | 32890 | 32900 | 32910 | 32920 | 32930 | 32940 | 32951   |      |      |
| K12 Zwischenstück 255.328 - 290.948 (32297)     | CC      | GG    | CGGA        | CGG   | GGCT  | ACT   | GCC   | GC    | TGG   | GGC     | CG   | AG   |
| SARS-CoV-2 Reference Genome NC_045512.2 (28427) | TG      | GT    | TAC         | CGG   | TCTC  | ACT   | CAAC  | A     | TGG   | CAAG    | GA   | AG   |
| Consensus (32869)                               |         | G     |             | CGC   |       | ACT   | C     | TGG   | G     | AGACC   | A    | CCC  |
|                                                 |         |       | Section 398 |       |       |       |       |       |       |         |      |      |
|                                                 | (32952) | 32952 | 32960       | 32970 | 32980 | 32990 | 33000 | 33010 | 33020 | 33034   |      |      |
| K12 Zwischenstück 255.328 - 290.948 (32379)     | A       | GGC   | GG          | CA    | AG    | CACG  | GC    | AG    | CT    | GAC     | CG   | T    |
| SARS-CoV-2 Reference Genome NC_045512.2 (28509) | ---     | GT    | C           | AG    | AT    | GAC   | CA    | AAT   | TG    | GT      | TACT | ACC  |
| Consensus (32952)                               |         |       | G           | C     | AG    |       | C     | A     | TG    | C       | A    | G    |
|                                                 |         |       | Section 399 |       |       |       |       |       |       |         |      |      |
|                                                 | (33035) | 33035 | 33040       | 33050 | 33060 | 33070 | 33080 | 33090 | 33100 | 33117   |      |      |
| K12 Zwischenstück 255.328 - 290.948 (32462)     | A       | TT    | TC          | GACG  | CA    | AG    | TT    | CG    | CT    | T       | GAC  | CCGG |
| SARS-CoV-2 Reference Genome NC_045512.2 (28581) | A       | TC    | TC          | AGTC  | CA    | AG    | AT    | GG    | TAT   | TT      | CT   | ACT  |
| Consensus (33035)                               |         | A     | T           | C     | AG    | T     | G     | T     | C     |         | A    | CT   |

Sars-CoV-2 & E.coli K12 Zwischenstück.eapr.apr

|                                                 |       |        |         |       |       |       |         |       |         |         |         |        |        |            |             |        |     |        |       |        |       |       |       |       |       |      |        |       |       |      |        |       |    |    |      |     |
|-------------------------------------------------|-------|--------|---------|-------|-------|-------|---------|-------|---------|---------|---------|--------|--------|------------|-------------|--------|-----|--------|-------|--------|-------|-------|-------|-------|-------|------|--------|-------|-------|------|--------|-------|----|----|------|-----|
|                                                 |       |        |         |       |       |       |         |       |         |         |         |        |        |            | Section 400 |        |     |        |       |        |       |       |       |       |       |      |        |       |       |      |        |       |    |    |      |     |
| (33118)                                         | 33118 | 33130  | 33140   | 33150 | 33160 | 33170 | 33180   | 33190 | 33200   |         |         |        |        |            |             |        |     |        |       |        |       |       |       |       |       |      |        |       |       |      |        |       |    |    |      |     |
| K12 Zwischenstück 255.328 - 290.948 (32545)     | CCG   | GGCTTC | TACGGCT | CTATG | GCAAC | GACTC | GCTCAAT | TCGA  | CC      | TT      | CACC    | CAATC  | GAC    | CGTGGCGCGC | CGC         | TGGCAG | C   | ACTT   |       |        |       |       |       |       |       |      |        |       |       |      |        |       |    |    |      |     |
| SARS-CoV-2 Reference Genome NC_045512.2 (28658) | ---   | GGCATC | ATA     | TGGGT | ---   | GCAAC | TGAGG   | GAG   | CTT     | ---     | GAA     | TACACC | AAA    | GAT        | CA          | -----  | CAT | TGGCAC | C     | ----   |       |       |       |       |       |      |        |       |       |      |        |       |    |    |      |     |
| Consensus (33118)                               |       | GGC    | TC      | TA    | GG    | T     |         | GCAAC |         | G       | C       | T      | GA     | T          | CACC        | AA     | GA  | C      |       | C      | TGGCA | C     |       |       |       |      |        |       |       |      |        |       |    |    |      |     |
|                                                 |       |        |         |       |       |       |         |       |         |         |         |        |        |            | Section 401 |        |     |        |       |        |       |       |       |       |       |      |        |       |       |      |        |       |    |    |      |     |
| (33201)                                         | 33201 | 33210  | 33220   | 33230 | 33240 | 33250 | 33260   | 33270 | 33283   |         |         |        |        |            |             |        |     |        |       |        |       |       |       |       |       |      |        |       |       |      |        |       |    |    |      |     |
| K12 Zwischenstück 255.328 - 290.948 (32628)     | CGC   | CT     | TCC     | GG    | GGC   | AGA   | AA      | C     | GG      | GATGGA  | GT      | CT     | CGCCGG | TG         | CACT        | TC     | CAG | CAG    | AGCG  | CGGG   | GCT   | GA    | CCT   | GCT   | ACTAC | AACA | GCA    |       |       |      |        |       |    |    |      |     |
| SARS-CoV-2 Reference Genome NC_045512.2 (28718) | CGC   | AA     | TCC     | T     | G     | CTA   | ACA     | AT    | GCT     | GCAATC  | GT      | GCT    | ACA    | ACT        | T           | C      | --- | TCA    | AG    | A      | A     | C     | GC    | A     | GCT   | CTAC | ---    | GCA   |       |      |        |       |    |    |      |     |
| Consensus (33201)                               | CGC   |        | TCC     | G     | A     | AA    | GC      | G     |         | GT      | CT      |        | T      | C          |             | TC     | AG  | A      | A     | C      | GC    | A     | GCT   | CTAC  |       | GCA  |        |       |       |      |        |       |    |    |      |     |
|                                                 |       |        |         |       |       |       |         |       |         |         |         |        |        |            | Section 402 |        |     |        |       |        |       |       |       |       |       |      |        |       |       |      |        |       |    |    |      |     |
| (33284)                                         | 33284 | 33290  | 33300   | 33310 | 33320 | 33330 | 33340   | 33350 | 33366   |         |         |        |        |            |             |        |     |        |       |        |       |       |       |       |       |      |        |       |       |      |        |       |    |    |      |     |
| K12 Zwischenstück 255.328 - 290.948 (32711)     | AA    | AACT   | GGAGC   | TACT  | GC    | TTTGT | GG      | ACTA  | CG      | AG      | GAGGGA  | CAG    | GT     | TAGA       | AC          | CATCA  | AA  | GT     | TATC  | ---    | CAG   | CTCGA | CC    | ACA   | ACGT  | TGCC |        |       |       |      |        |       |    |    |      |     |
| SARS-CoV-2 Reference Genome NC_045512.2 (28793) | G     | AA     | G       | ---   | GGAGC | AGAG  | GC      | ---   | GG      | CAGT    | CA      | AG     | CCTCTT | CTC        | GT          | T      | CCT | ---    | CATCA | C      | GT    | AG    | TC    | GCA   | CAGTT | CA   | AGAA   | AT    | TCAA  |      |        |       |    |    |      |     |
| Consensus (33284)                               | AA    |        | GGAGC   |       | GC    |       | GG      |       | C       | AG      |         | C      | G      | T          |             | CATCA  | GT  | TC     | CA    | C      |       | C     | A     | AA    | T     |      |        |       |       |      |        |       |    |    |      |     |
|                                                 |       |        |         |       |       |       |         |       |         |         |         |        |        |            | Section 403 |        |     |        |       |        |       |       |       |       |       |      |        |       |       |      |        |       |    |    |      |     |
| (33367)                                         | 33367 | 33380  | 33390   | 33400 | 33410 | 33420 | 33430   | 33449 |         |         |         |        |        |            |             |        |     |        |       |        |       |       |       |       |       |      |        |       |       |      |        |       |    |    |      |     |
| K12 Zwischenstück 255.328 - 290.948 (32793)     | G     | TC     | GT      | GGC   | GC    | TG    | CAC     | GAG   | CAG     | CCCCA   | TTC     | CGG    | TGC    | CG         | GAA         | ---    | CAT | GC     | GGA   | GAGC   | GT    | CTG   | GCTGC | GGG   | TG    | GAC  | TG     | GAT   | TAC   | GC   |        |       |    |    |      |     |
| SARS-CoV-2 Reference Genome NC_045512.2 (28866) | C     | TC     | CA      | GGC   | AG    | AG    | TA      | GG    | GG      | AAC     | ---     | TTC    | TCC    | TGC        | TA          | GAA    | TGG | CTG    | GC    | AAT    | GCG   | GT    | GAT   | GCTGC | TCT   | TG   | ---    | CT    | T     | TGCT | ---    | GC    |    |    |      |     |
| Consensus (33367)                               |       | TC     |         | GGC   | GC    | G     | A       | G     | G       | A       |         | TTC    |        | TGC        |             | GAA    |     | C      | GC    | G      | GT    |       | GCTGC |       | TG    | C    | T      | G     | T     |      | GC     |       |    |    |      |     |
|                                                 |       |        |         |       |       |       |         |       |         |         |         |        |        |            | Section 404 |        |     |        |       |        |       |       |       |       |       |      |        |       |       |      |        |       |    |    |      |     |
| (33450)                                         | 33450 | 33460  | 33470   | 33480 | 33490 | 33500 | 33510   | 33520 | 33532   |         |         |        |        |            |             |        |     |        |       |        |       |       |       |       |       |      |        |       |       |      |        |       |    |    |      |     |
| K12 Zwischenstück 255.328 - 290.948 (32873)     | TG    | G      | T       | CT    | AC    | CG    | CT      | AC    | AG      | TA      | CTC     | GT     | TTGA   | TG         | GC          | GAG    | AC  | GT     | GGC   | AC     | ACC   | GT    | GCC   | GGT   | AC    | GT   | ATG    | AGGC  | GT    | GG   | AA     | CTGTC | GG | AC |      |     |
| SARS-CoV-2 Reference Genome NC_045512.2 (28941) | TG    | C      | T       | TG    | AC    | AG    | AT      | TG    | AA      | CCA     | ---     | G      | CTTGA  | GAG        | CA          | AA     | AT  | GT     | CTGGT | AA     | AG    | ---   | GCC   | AACA  | ACA   | ---  | ACA    | AGGC  | ---   | AA   | CTGTC  | ---   | AC |    |      |     |
| Consensus (33450)                               | TG    | T      |         | AC    | G     | T     |         | A     | C       | A       |         | G      | TTGA   | GC         | A           | A      | GT  |        | A     | G      | GCC   |       | AC    | A     | AGGC  |      | AA     | CTGTC |       | AC   |        |       |    |    |      |     |
|                                                 |       |        |         |       |       |       |         |       |         |         |         |        |        |            | Section 405 |        |     |        |       |        |       |       |       |       |       |      |        |       |       |      |        |       |    |    |      |     |
| (33533)                                         | 33533 | 33540  | 33550   | 33560 | 33570 | 33580 | 33590   | 33600 | 33615   |         |         |        |        |            |             |        |     |        |       |        |       |       |       |       |       |      |        |       |       |      |        |       |    |    |      |     |
| K12 Zwischenstück 255.328 - 290.948 (32956)     | G     | ACT    | AC      | ATC   | GG    | CG    | GG      | CG    | CG      | GGCTTCT | TC      | ACC    | GG     | GG         | CG          | TTTGTG | --- | GGC    | CTGC  | ACTGCG | AG    | GAC   | ATC   | AG    | CGGCG | AC   | GGCTGC | T     | AC    |      |        |       |    |    |      |     |
| SARS-CoV-2 Reference Genome NC_045512.2 (29014) | T     | A      | AG      | AA    | ATC   | T     | GC      | T     | CT      | GAG     | GGCTTCT | AAG    | AG     | CG         | T           | CG     | GCA | AA     | AC    | GTA    | CTGC  | C     | ACTAA | AG    | C     | AT   | ACA    | AT    | GTAAC | AC   | AAGCTT | T     | CG |    |      |     |
| Consensus (33533)                               | A     | A      |         | ATC   | GC    | G     |         | G     | GGCTTCT |         |         | G      | C      | CG         |             | G      |     | CTGC   |       | AG     | A     | A     | A     |       | AC    |      | T      |       |       |      |        |       |    |    |      |     |
|                                                 |       |        |         |       |       |       |         |       |         |         |         |        |        |            | Section 406 |        |     |        |       |        |       |       |       |       |       |      |        |       |       |      |        |       |    |    |      |     |
| (33616)                                         | 33616 | 33630  | 33640   | 33650 | 33660 | 33670 | 33680   | 33698 |         |         |         |        |        |            |             |        |     |        |       |        |       |       |       |       |       |      |        |       |       |      |        |       |    |    |      |     |
| K12 Zwischenstück 255.328 - 290.948 (33037)     | GC    | G      | GAC     | T     | TC    | G     | ACT     | A     | CTT     | CA      | CCTAC   | GAG    | CCGG   | T          | CT          | AAC    | GG  | CT     | CAGG  | CCGGG  | TAGC  | CCAG  | CGC   | GCG   | GAG   | AGCG | CG     | AG    | CCG   | GC   |        |       |    |    |      |     |
| SARS-CoV-2 Reference Genome NC_045512.2 (29097) | GC    | A      | GAC     | G     | T     | GG    | TC      | G     | AA      | CA      | AACC    | CA     | AG     | G          | AA          | TT     | T   | TGG    | GG    | AC     | CAGG  | AAC   | ---   | TA    | AT    | CAGA | C      | AA    | G     | AACT | GA     | TTA   | CA | AA | CATT | GGC |
| Consensus (33616)                               | GC    |        | GAC     | T     | G     | C     | A       |       | CA      |         | C       | AG     |        | T          | T           |        | GG  |        | CAGG  |        | TA    | C     | C     | G     |       | GA   | C      | A     | C     |      | G      | C     |    |    |      |     |

Sars-CoV-2 & E.coli K12 Zwischenstück.eapr.apr

|                                                 |          |       |         |       |       |       |       |       |       |             |
|-------------------------------------------------|----------|-------|---------|-------|-------|-------|-------|-------|-------|-------------|
|                                                 |          |       |         |       |       |       |       |       |       | Section 407 |
| (33699)                                         | 33699    | 33710 | 33720   | 33730 | 33740 | 33750 | 33760 | 33770 | 33781 |             |
| K12 Zwischenstück 255.328 - 290.948 (33120)     | TGC      | TGAA  | GC      | TG    | CT    | CG    | GA    | AA    | TT    | AG          |
| SARS-CoV-2 Reference Genome NC_045512.2 (29178) | CG       | GC    | AA      | AT    | TG    | CA    | ----- | AA    | TT    | TG          |
| Consensus (33699)                               | GC       | AA    | TGC     | C     | AATT  | GCC   | C     | CGC   | TC    | C           |
|                                                 |          |       |         |       |       |       |       |       |       | Section 408 |
| (33787)                                         | 33782    | 33790 | 33800   | 33810 | 33820 | 33830 | 33840 | 33850 | 33864 |             |
| K12 Zwischenstück 255.328 - 290.948 (33201)     | AC       | CG    | CG      | GG    | ACT   | CG    | TGG   | TT    | CG    | CA          |
| SARS-CoV-2 Reference Genome NC_045512.2 (29249) | CT       | TC    | GG      | GAA   | CG    | TGG   | TT    | CG    | CA    | -----       |
| Consensus (33782)                               | C        | GG    | CGTGGTT | CC    | ACAC  | GG    | CC    | CA    | G     | G           |
|                                                 |          |       |         |       |       |       |       |       |       | Section 409 |
| (33865)                                         | 33865    | 33870 | 33880   | 33890 | 33900 | 33910 | 33920 | 33930 | 33947 |             |
| K12 Zwischenstück 255.328 - 290.948 (33281)     | TTG      | CT    | CG      | CG    | CG    | CG    | CG    | CG    | CG    | CG          |
| SARS-CoV-2 Reference Genome NC_045512.2 (29327) | TTG      | CT    | CG      | CG    | CG    | CG    | CG    | CG    | CG    | CG          |
| Consensus (33865)                               | TTGCT    | G     | T       | GC    | G     | CGC   | A     | AA    | TTC   | C           |
|                                                 |          |       |         |       |       |       |       |       |       | Section 410 |
| (33948)                                         | 33948    | 33960 | 33970   | 33980 | 33990 | 34000 | 34010 | 34020 | 34030 |             |
| K12 Zwischenstück 255.328 - 290.948 (33363)     | CC       | CTC   | AGC     | AGG   | GG    | CTC   | AGC   | TCC   | AGC   | AGC         |
| SARS-CoV-2 Reference Genome NC_045512.2 (29407) | AA       | CTC   | AGC     | ----- | CT    | AGC   | AGC   | AGC   | AGC   | AGC         |
| Consensus (33948)                               | CTC      | AGC   | C       | T     | C     | GC    | G     | C     | G     | A           |
|                                                 |          |       |         |       |       |       |       |       |       | Section 411 |
| (34031)                                         | 34031    | 34040 | 34050   | 34060 | 34070 | 34080 | 34090 | 34100 | 34113 |             |
| K12 Zwischenstück 255.328 - 290.948 (33446)     | G        | CGG   | CGA     | TG    | CG    | TG    | AA    | TA    | GG    | CG          |
| SARS-CoV-2 Reference Genome NC_045512.2 (29481) | T        | CTC   | CAA     | CAAT  | TG    | CA    | CAAT  | CG    | ATG   | AG          |
| Consensus (34031)                               | C        | C     | A       | TG    | AA    | A     | C     | ATG   | CAG   | TGC         |
|                                                 |          |       |         |       |       |       |       |       |       | Section 412 |
| (34114)                                         | 34114    | 34120 | 34130   | 34140 | 34150 | 34160 | 34170 | 34180 | 34196 |             |
| K12 Zwischenstück 255.328 - 290.948 (33527)     | CCC      | CAG   | ATG     | GGG   | TGG   | CT    | GCC   | CG    | GT    | CG          |
| SARS-CoV-2 Reference Genome NC_045512.2 (29555) | ---      | CAG   | ATG     | GGG   | CTA   | TAT   | AAA   | CG    | TT    | CG          |
| Consensus (34114)                               | CAGATGGG | T     | T       | CG    | T     | CGC   | C     | T     | CG    | A           |
|                                                 |          |       |         |       |       |       |       |       |       | Section 413 |
| (34197)                                         | 34197    | 34210 | 34220   | 34230 | 34240 | 34250 | 34260 | 34279 |       |             |
| K12 Zwischenstück 255.328 - 290.948 (33609)     | ACG      | ACA   | AA      | AT    | GC    | CG    | CG    | CT    | CG    | CG          |
| SARS-CoV-2 Reference Genome NC_045512.2 (29628) | GTA      | ACT   | ACAT    | AG    | ----- | ACA   | AG    | TAG   | ATG   | -----       |
| Consensus (34197)                               | AC       | A     | AT      | GC    | AC    | AG    | T     | ATG   | TA    | TT          |

Sars-CoV-2 & E.coli K12 Zwischenstücke apr.apr

[illegible]

Sars-CoV-2 & E.coli K12 Zwischenstückeap.r.apr

|                                                 |         |                                                                                      |                       |                       |                       |                       |                       |                       |                       |                       |
|-------------------------------------------------|---------|--------------------------------------------------------------------------------------|-----------------------|-----------------------|-----------------------|-----------------------|-----------------------|-----------------------|-----------------------|-----------------------|
|                                                 |         |                                                                                      |                       |                       |                       |                       |                       |                       |                       | Section 421           |
|                                                 | (34861) | <a href="#">34861</a>                                                                | <a href="#">34870</a> | <a href="#">34880</a> | <a href="#">34890</a> | <a href="#">34900</a> | <a href="#">34910</a> | <a href="#">34920</a> | <a href="#">34930</a> | <a href="#">34943</a> |
| K12 Zwischenstück 255.328 - 290.948 (34270)     |         | TCGACACCCACACGTCGGTATAGATAAAAGTCCGCGCCCTTAACGCCTGCCGCCACGTCTTCCGTCAGAGTAATTTTCCCGCCG |                       |                       |                       |                       |                       |                       |                       |                       |
| SARS-CoV-2 Reference Genome NC 045512.2 (29904) |         | -----                                                                                |                       |                       |                       |                       |                       |                       |                       |                       |
| Consensus (34861)                               |         |                                                                                      |                       |                       |                       |                       |                       |                       |                       |                       |
|                                                 |         |                                                                                      |                       |                       |                       |                       |                       |                       |                       | Section 422           |
|                                                 | (34944) | <a href="#">34944</a>                                                                | <a href="#">34950</a> | <a href="#">34960</a> | <a href="#">34970</a> | <a href="#">34980</a> | <a href="#">34990</a> | <a href="#">35000</a> | <a href="#">35010</a> | <a href="#">35026</a> |
| K12 Zwischenstück 255.328 - 290.948 (34353)     |         | TGCTTCTCCGCCAGCGCGCTGCACTCCGCCACCAGGCTCTCTTCCGGCCAGCAGGCTTTCCGGGGCCAACAGGCGCAGATCCAG |                       |                       |                       |                       |                       |                       |                       |                       |
| SARS-CoV-2 Reference Genome NC 045512.2 (29904) |         | -----                                                                                |                       |                       |                       |                       |                       |                       |                       |                       |
| Consensus (34944)                               |         |                                                                                      |                       |                       |                       |                       |                       |                       |                       |                       |
|                                                 |         |                                                                                      |                       |                       |                       |                       |                       |                       |                       | Section 423           |
|                                                 | (35027) | <a href="#">35027</a>                                                                | <a href="#">35040</a> | <a href="#">35050</a> | <a href="#">35060</a> | <a href="#">35070</a> | <a href="#">35080</a> | <a href="#">35090</a> |                       | <a href="#">35109</a> |
| K12 Zwischenstück 255.328 - 290.948 (34436)     |         | CCCGGTCAGCGCCCGCGCTTCCAGCATCGAGTTGCCCATGTTGTTGCGCGCATCGCCCGCTAGACCAGCGTCATCTCGTTAA   |                       |                       |                       |                       |                       |                       |                       |                       |
| SARS-CoV-2 Reference Genome NC 045512.2 (29904) |         | -----                                                                                |                       |                       |                       |                       |                       |                       |                       |                       |
| Consensus (35027)                               |         |                                                                                      |                       |                       |                       |                       |                       |                       |                       |                       |
|                                                 |         |                                                                                      |                       |                       |                       |                       |                       |                       |                       | Section 424           |
|                                                 | (35110) | <a href="#">35110</a>                                                                | <a href="#">35120</a> | <a href="#">35130</a> | <a href="#">35140</a> | <a href="#">35150</a> | <a href="#">35160</a> | <a href="#">35170</a> | <a href="#">35180</a> | <a href="#">35192</a> |
| K12 Zwischenstück 255.328 - 290.948 (34519)     |         | ACGCCTTGCCCGGCAGGTGCTCCTGCATGGTCATCAGGTCCGCCAGCAGCTGGGTGCGGTGGAACCTCGTTGGTCAGCCCGTTC |                       |                       |                       |                       |                       |                       |                       |                       |
| SARS-CoV-2 Reference Genome NC 045512.2 (29904) |         | -----                                                                                |                       |                       |                       |                       |                       |                       |                       |                       |
| Consensus (35110)                               |         |                                                                                      |                       |                       |                       |                       |                       |                       |                       |                       |
|                                                 |         |                                                                                      |                       |                       |                       |                       |                       |                       |                       | Section 425           |
|                                                 | (35193) | <a href="#">35193</a>                                                                | <a href="#">35200</a> | <a href="#">35210</a> | <a href="#">35220</a> | <a href="#">35230</a> | <a href="#">35240</a> | <a href="#">35250</a> | <a href="#">35260</a> | <a href="#">35275</a> |
| K12 Zwischenstück 255.328 - 290.948 (34602)     |         | CACACCGGCACGCCCCGATACCTGCGCCAGCGTTTCGACCACTTCTGGCCGTGACCGCGATACTGAATGCCGTATACATCCG   |                       |                       |                       |                       |                       |                       |                       |                       |
| SARS-CoV-2 Reference Genome NC 045512.2 (29904) |         | -----                                                                                |                       |                       |                       |                       |                       |                       |                       |                       |
| Consensus (35193)                               |         |                                                                                      |                       |                       |                       |                       |                       |                       |                       |                       |
|                                                 |         |                                                                                      |                       |                       |                       |                       |                       |                       |                       | Section 426           |
|                                                 | (35276) | <a href="#">35276</a>                                                                | <a href="#">35290</a> | <a href="#">35300</a> | <a href="#">35310</a> | <a href="#">35320</a> | <a href="#">35330</a> | <a href="#">35340</a> |                       | <a href="#">35358</a> |
| K12 Zwischenstück 255.328 - 290.948 (34685)     |         | CCCGAGAACCCGCGCGGTGTCCTTAATTGACTCTTTATGCCCAATCTGGCTGCCGCTCGGCCCTAAATAGGTAACGCGCGCGC  |                       |                       |                       |                       |                       |                       |                       |                       |
| SARS-CoV-2 Reference Genome NC 045512.2 (29904) |         | -----                                                                                |                       |                       |                       |                       |                       |                       |                       |                       |
| Consensus (35276)                               |         |                                                                                      |                       |                       |                       |                       |                       |                       |                       |                       |
|                                                 |         |                                                                                      |                       |                       |                       |                       |                       |                       |                       | Section 427           |
|                                                 | (35359) | <a href="#">35359</a>                                                                | <a href="#">35370</a> | <a href="#">35380</a> | <a href="#">35390</a> | <a href="#">35400</a> | <a href="#">35410</a> | <a href="#">35420</a> | <a href="#">35430</a> | <a href="#">35441</a> |
| K12 Zwischenstück 255.328 - 290.948 (34768)     |         | CCTGGTCAAATGCGGCAACTTCGAAAGAGCAACGGGTACGAGTCGAGTCTTTTTCGAAGATGAGCGCGATGTTTTTACCGGTA  |                       |                       |                       |                       |                       |                       |                       |                       |
| SARS-CoV-2 Reference Genome NC 045512.2 (29904) |         | -----                                                                                |                       |                       |                       |                       |                       |                       |                       |                       |
| Consensus (35359)                               |         |                                                                                      |                       |                       |                       |                       |                       |                       |                       |                       |

Sars-CoV-2 & E.coli K12 Zwischenstück.epr.apr

|                                                 |         |                                                                                       |       |       |       |       |       |       |       |             |
|-------------------------------------------------|---------|---------------------------------------------------------------------------------------|-------|-------|-------|-------|-------|-------|-------|-------------|
|                                                 |         |                                                                                       |       |       |       |       |       |       |       | Section 428 |
|                                                 | (35442) | 35442                                                                                 | 35450 | 35460 | 35470 | 35480 | 35490 | 35500 | 35510 | 35524       |
| K12 Zwischenstück 255.328 - 290.948 (34851)     |         | AGCTTCTGTACTTCCTTGCCATTTTTTTTATCGGCTTTGAGCTGTGCGGCAAGGGTCAGCAGAGAAGTGAAGTGTGCAGGGGT   |       |       |       |       |       |       |       |             |
| SARS-CoV-2 Reference Genome NC_045512.2 (29904) |         | -----                                                                                 |       |       |       |       |       |       |       |             |
| Consensus (35442)                               |         |                                                                                       |       |       |       |       |       |       |       |             |
|                                                 |         |                                                                                       |       |       |       |       |       |       |       | Section 429 |
|                                                 | (35525) | 35525                                                                                 | 35530 | 35540 | 35550 | 35560 | 35570 | 35580 | 35590 | 35607       |
| K12 Zwischenstück 255.328 - 290.948 (34934)     |         | AAAGTCGAGCAGTTTCAGAAAGTGTTTTTGTATAAATCGGACATTTTATCCTCGCATGGCGAACGCCACTTATTGAATTTAA    |       |       |       |       |       |       |       |             |
| SARS-CoV-2 Reference Genome NC_045512.2 (29904) |         | -----                                                                                 |       |       |       |       |       |       |       |             |
| Consensus (35525)                               |         |                                                                                       |       |       |       |       |       |       |       |             |
|                                                 |         |                                                                                       |       |       |       |       |       |       |       | Section 430 |
|                                                 | (35608) | 35608                                                                                 | 35620 | 35630 | 35640 | 35650 | 35660 | 35670 | 35680 | 35690       |
| K12 Zwischenstück 255.328 - 290.948 (35017)     |         | ATTCACTTTATATGTGTAATTATTCATTTGCAACCCCATTTTACAATTCTTTCTTACAAAGGTGGAGGCAAACCCGTCCTGT    |       |       |       |       |       |       |       |             |
| SARS-CoV-2 Reference Genome NC_045512.2 (29904) |         | -----                                                                                 |       |       |       |       |       |       |       |             |
| Consensus (35608)                               |         |                                                                                       |       |       |       |       |       |       |       |             |
|                                                 |         |                                                                                       |       |       |       |       |       |       |       | Section 431 |
|                                                 | (35691) | 35691                                                                                 | 35700 | 35710 | 35720 | 35730 | 35740 | 35750 | 35760 | 35773       |
| K12 Zwischenstück 255.328 - 290.948 (35100)     |         | GTGAAAATAATCGTATCTGCCTCCGATTCTCTGCAGAAGCAGAAAGACATTGGATCGAATTCTACAACCAGGTCGAGTCAGAA   |       |       |       |       |       |       |       |             |
| SARS-CoV-2 Reference Genome NC_045512.2 (29904) |         | -----                                                                                 |       |       |       |       |       |       |       |             |
| Consensus (35691)                               |         |                                                                                       |       |       |       |       |       |       |       |             |
|                                                 |         |                                                                                       |       |       |       |       |       |       |       | Section 432 |
|                                                 | (35774) | 35774                                                                                 | 35780 | 35790 | 35800 | 35810 | 35820 | 35830 | 35840 | 35856       |
| K12 Zwischenstück 255.328 - 290.948 (35183)     |         | ATGAGAATGATTGGCCTTCTTTATGATTTTAAGGATTATGCTTCTAAAATGGCGGAGAACATGGCGAGGCTTGCTGCCTTACT   |       |       |       |       |       |       |       |             |
| SARS-CoV-2 Reference Genome NC_045512.2 (29904) |         | -----                                                                                 |       |       |       |       |       |       |       |             |
| Consensus (35774)                               |         |                                                                                       |       |       |       |       |       |       |       |             |
|                                                 |         |                                                                                       |       |       |       |       |       |       |       | Section 433 |
|                                                 | (35857) | 35857                                                                                 | 35870 | 35880 | 35890 | 35900 | 35910 | 35920 |       | 35939       |
| K12 Zwischenstück 255.328 - 290.948 (35266)     |         | TCATTACTTCAGCGGTGATGGAGGCGATATATCTGTTACCGGGTAATGACTCCAACCTTATTGATAGTGTTTTATGTTTCAGATA |       |       |       |       |       |       |       |             |
| SARS-CoV-2 Reference Genome NC_045512.2 (29904) |         | -----                                                                                 |       |       |       |       |       |       |       |             |
| Consensus (35857)                               |         |                                                                                       |       |       |       |       |       |       |       |             |
|                                                 |         |                                                                                       |       |       |       |       |       |       |       | Section 434 |
|                                                 | (35940) | 35940                                                                                 | 35950 | 35960 | 35970 | 35980 | 35990 | 36000 | 36010 | 36022       |
| K12 Zwischenstück 255.328 - 290.948 (35349)     |         | ATGCCCCGATGACTTTGTCATGCTGCTCCACCGATTTTGAGAACGACAGCGACTTCCGTCCCAGCCGTGCCAGGTGCTGCCTCA  |       |       |       |       |       |       |       |             |
| SARS-CoV-2 Reference Genome NC_045512.2 (29904) |         | -----                                                                                 |       |       |       |       |       |       |       |             |
| Consensus (35940)                               |         |                                                                                       |       |       |       |       |       |       |       |             |

Sars-CoV-2 & E.coli K12 Zwischenstückeaprr.apr

|                                         |         |                                                                                       |              |              |              |              |              |              |              |              |
|-----------------------------------------|---------|---------------------------------------------------------------------------------------|--------------|--------------|--------------|--------------|--------------|--------------|--------------|--------------|
|                                         |         |                                                                                       |              |              |              |              |              |              |              | Section 435  |
|                                         | (36023) | <u>36023</u>                                                                          | <u>36030</u> | <u>36040</u> | <u>36050</u> | <u>36060</u> | <u>36070</u> | <u>36080</u> | <u>36090</u> | <u>36105</u> |
| K12 Zwischenstück 255.328 - 290.948     | (35432) | GATTCAGGTTATGCCGCTCAATTTCGCTGCGTATATCGCTTGCTGATTACGTGCAGCTTTCCCTTCAGGCGGGATTTCATACAGC |              |              |              |              |              |              |              |              |
| SARS-CoV-2 Reference Genome NC_045512.2 | (29904) | -----                                                                                 |              |              |              |              |              |              |              |              |
| Consensus                               | (36023) |                                                                                       |              |              |              |              |              |              |              |              |
|                                         |         |                                                                                       |              |              |              |              |              |              |              | Section 436  |
|                                         | (36106) | <u>36106</u>                                                                          | <u>36120</u> | <u>36130</u> | <u>36140</u> | <u>36150</u> | <u>36160</u> | <u>36170</u> | <u>36188</u> |              |
| K12 Zwischenstück 255.328 - 290.948     | (35515) | GGCCAGCCATCCGTCATCCATATCACCACGTCAAAGGGTGACAGCAGGCTCATAAGACGCCCCAGCGTCGCCATAGTGCGTTC   |              |              |              |              |              |              |              |              |
| SARS-CoV-2 Reference Genome NC_045512.2 | (29904) | -----                                                                                 |              |              |              |              |              |              |              |              |
| Consensus                               | (36106) |                                                                                       |              |              |              |              |              |              |              |              |
|                                         |         |                                                                                       |              |              |              |              |              |              |              | Section 437  |
|                                         | (36189) | <u>36189</u>                                                                          | <u>36200</u> | <u>36212</u> |              |              |              |              |              |              |
| K12 Zwischenstück 255.328 - 290.948     | (35598) | ACCGAATACGTGCGCAACAACCGT                                                              |              |              |              |              |              |              |              |              |
| SARS-CoV-2 Reference Genome NC_045512.2 | (29904) | -----                                                                                 |              |              |              |              |              |              |              |              |
| Consensus                               | (36189) |                                                                                       |              |              |              |              |              |              |              |              |
