# Supplementary material for: Ubiquitous Micro-Modular Homologies among Genomes from Viruses to Bacteria to Human Mitochondrial DNA: Platforms for Recombination during Evolution?
Source: MDPI journal article supplement (doi:10.3390/v14050885), 2022-04-24
Supplement: s1 [file s1]

SARS-CoV-2 & Hepatitis B.apr

|                                                         |       |                                                                                                   |     |     |     |     |     |     |     |     |     |
|---------------------------------------------------------|-------|---------------------------------------------------------------------------------------------------|-----|-----|-----|-----|-----|-----|-----|-----|-----|
|                                                         |       | Section 1                                                                                         |     |     |     |     |     |     |     |     |     |
| Hepatitis B virus NC_003977.2<br>SARS-CoV-2 NC_045512.2 | (1)   | 1                                                                                                 | 10  | 20  | 30  | 40  | 50  | 60  | 70  | 80  | 94  |
|                                                         | (1)   | -----                                                                                             |     |     |     |     |     |     |     |     |     |
|                                                         | (1)   | ATTAAAGGTTTATACCTTCCCAGGTAACAAACCAACCAACTTTTCGATCTCTTGTAGATCTGTTCTCTAAACGAACTTTAAATCTGTGTGGCTG    |     |     |     |     |     |     |     |     |     |
|                                                         |       | Section 2                                                                                         |     |     |     |     |     |     |     |     |     |
| Hepatitis B virus NC_003977.2<br>SARS-CoV-2 NC_045512.2 | (95)  | 95                                                                                                | 100 | 110 | 120 | 130 | 140 | 150 | 160 | 170 | 188 |
|                                                         | (1)   | -----                                                                                             |     |     |     |     |     |     |     |     |     |
|                                                         | (95)  | TCACTCGGCTGCATGCTTAGTGCACTCACGCAGTATAATTAATAACTAATTACTGTCGTTGACAGGACACGAGTAACTCGTCTATCTTCTGCAG    |     |     |     |     |     |     |     |     |     |
|                                                         |       | Section 3                                                                                         |     |     |     |     |     |     |     |     |     |
| Hepatitis B virus NC_003977.2<br>SARS-CoV-2 NC_045512.2 | (189) | 189                                                                                               | 200 | 210 | 220 | 230 | 240 | 250 | 260 | 270 | 282 |
|                                                         | (1)   | -----                                                                                             |     |     |     |     |     |     |     |     |     |
|                                                         | (189) | GCTGCTTACGGTTTCGTCCGTGTTGCAGCCGATCATCAGCACATCTAGGTTTCGTCCGGGTGTGACCGAAAGGTAAGATGGAGAGCCTTGTCCC    |     |     |     |     |     |     |     |     |     |
|                                                         |       | Section 4                                                                                         |     |     |     |     |     |     |     |     |     |
| Hepatitis B virus NC_003977.2<br>SARS-CoV-2 NC_045512.2 | (283) | 283                                                                                               | 290 | 300 | 310 | 320 | 330 | 340 | 350 | 360 | 376 |
|                                                         | (1)   | -----                                                                                             |     |     |     |     |     |     |     |     |     |
|                                                         | (283) | TGGTTTCAACGAGAAAAACACACGTCCAACCTCAGTTTGCCTGTTTTACAGGTTTCGCGACGTGCTCGTACGTGGCTTTGGAGACTCCGTGGAGGAG |     |     |     |     |     |     |     |     |     |
|                                                         |       | Section 5                                                                                         |     |     |     |     |     |     |     |     |     |
| Hepatitis B virus NC_003977.2<br>SARS-CoV-2 NC_045512.2 | (377) | 377                                                                                               | 390 | 400 | 410 | 420 | 430 | 440 | 450 | 460 | 470 |
|                                                         | (1)   | -----                                                                                             |     |     |     |     |     |     |     |     |     |
|                                                         | (377) | GTCTTATCAGAGGCACGTCAACATCTTAAAGATGGCACTTGTGGCTTAGTAGAAGTTGAAAAAGGCGTTTTGCCTCAACTTGAACAGCCCTATG    |     |     |     |     |     |     |     |     |     |
|                                                         |       | Section 6                                                                                         |     |     |     |     |     |     |     |     |     |
| Hepatitis B virus NC_003977.2<br>SARS-CoV-2 NC_045512.2 | (471) | 471                                                                                               | 480 | 490 | 500 | 510 | 520 | 530 | 540 | 550 | 564 |
|                                                         | (1)   | -----                                                                                             |     |     |     |     |     |     |     |     |     |
|                                                         | (471) | TGTTTCATCAAACGTTTCGGATGCTCGAACTGCACCTCATGGTCATGTTATGGTTGAGCTGGTAGCAGAACTCGAAGGCATTTCAGTACGGTCGTAG |     |     |     |     |     |     |     |     |     |
|                                                         |       | Section 7                                                                                         |     |     |     |     |     |     |     |     |     |
| Hepatitis B virus NC_003977.2<br>SARS-CoV-2 NC_045512.2 | (565) | 565                                                                                               | 570 | 580 | 590 | 600 | 610 | 620 | 630 | 640 | 658 |
|                                                         | (1)   | -----                                                                                             |     |     |     |     |     |     |     |     |     |
|                                                         | (565) | TGGTGAGACACTTGGTGTCTTGTCCCTCATGTGGGCGAAATACCAGTGGCTTACCGCAAGGTTCTTCTTCGTAAGAACGGTAATAAAGGAGCT     |     |     |     |     |     |     |     |     |     |

SARS-CoV-2 & Hepatitis B.apr

|                                                         |        |                                                                                                 |      |      |      |      |      |      |      |      |      |
|---------------------------------------------------------|--------|-------------------------------------------------------------------------------------------------|------|------|------|------|------|------|------|------|------|
|                                                         |        | Section 8                                                                                       |      |      |      |      |      |      |      |      |      |
| Hepatitis B virus NC_003977.2<br>SARS-CoV-2 NC_045512.2 | (659)  | 659                                                                                             | 670  | 680  | 690  | 700  | 710  | 720  | 730  | 740  | 752  |
|                                                         | (1)    | -----                                                                                           |      |      |      |      |      |      |      |      |      |
|                                                         | (659)  | GGTGGCCATAGTTACGGCGCCGATCTAAAGTCATTTGACTTAGGCGACGAGCTTGGCACTGATCCTTATGAAGATTTTCAAGAAAACCTGGAACA |      |      |      |      |      |      |      |      |      |
|                                                         |        | Section 9                                                                                       |      |      |      |      |      |      |      |      |      |
| Hepatitis B virus NC_003977.2<br>SARS-CoV-2 NC_045512.2 | (753)  | 753                                                                                             | 760  | 770  | 780  | 790  | 800  | 810  | 820  | 830  | 846  |
|                                                         | (1)    | -----                                                                                           |      |      |      |      |      |      |      |      |      |
|                                                         | (753)  | CTAAACATAGCAGTGGTGTTACCCGTGAACTCATGCGTGAGCTTAACGGAGGGGCATACACTCGCTATGTCGATAACAACCTTCTGTGGCCCTGA |      |      |      |      |      |      |      |      |      |
|                                                         |        | Section 10                                                                                      |      |      |      |      |      |      |      |      |      |
| Hepatitis B virus NC_003977.2<br>SARS-CoV-2 NC_045512.2 | (847)  | 847                                                                                             | 860  | 870  | 880  | 890  | 900  | 910  | 920  | 930  | 940  |
|                                                         | (1)    | -----                                                                                           |      |      |      |      |      |      |      |      |      |
|                                                         | (847)  | TGGCTACCCTCTTGAGTGCATTAAAGACCTTCTAGCACGTGCTGGTAAAGCTTCATGCACTTTGTCCGAACAACCTGGACTTTATTGACACTAAG |      |      |      |      |      |      |      |      |      |
|                                                         |        | Section 11                                                                                      |      |      |      |      |      |      |      |      |      |
| Hepatitis B virus NC_003977.2<br>SARS-CoV-2 NC_045512.2 | (941)  | 941                                                                                             | 950  | 960  | 970  | 980  | 990  | 1000 | 1010 | 1020 | 1034 |
|                                                         | (1)    | -----                                                                                           |      |      |      |      |      |      |      |      |      |
|                                                         | (941)  | AGGGGTGTATACTGCTGCCGTGAACATGAGCATGAAATTGCTTGGTACACGGAACGTTCTGAAAAGAGCTATGAATTGCAGACACCTTTTGAAA  |      |      |      |      |      |      |      |      |      |
|                                                         |        | Section 12                                                                                      |      |      |      |      |      |      |      |      |      |
| Hepatitis B virus NC_003977.2<br>SARS-CoV-2 NC_045512.2 | (1035) | 1035                                                                                            | 1040 | 1050 | 1060 | 1070 | 1080 | 1090 | 1100 | 1110 | 1128 |
|                                                         | (1)    | -----                                                                                           |      |      |      |      |      |      |      |      |      |
|                                                         | (1035) | TTAAATTGGCAAAGAAATTTGACACCTTCAATGGGGAATGTCCAAATTTTGTATTTCCCTTAAATTCCATAATCAAGACTATTCAACCAAGGGT  |      |      |      |      |      |      |      |      |      |
|                                                         |        | Section 13                                                                                      |      |      |      |      |      |      |      |      |      |
| Hepatitis B virus NC_003977.2<br>SARS-CoV-2 NC_045512.2 | (1129) | 1129                                                                                            | 1140 | 1150 | 1160 | 1170 | 1180 | 1190 | 1200 | 1210 | 1222 |
|                                                         | (1)    | -----                                                                                           |      |      |      |      |      |      |      |      |      |
|                                                         | (1129) | TGAAAAGAAAAAGCTTGATGGCTTTATGGGTAGAATTCGATCTGTCTATCCAGTTGCGTCACCAAATGAATGCAACCAAATGTGCCTTTCAACT  |      |      |      |      |      |      |      |      |      |
|                                                         |        | Section 14                                                                                      |      |      |      |      |      |      |      |      |      |
| Hepatitis B virus NC_003977.2<br>SARS-CoV-2 NC_045512.2 | (1223) | 1223                                                                                            | 1230 | 1240 | 1250 | 1260 | 1270 | 1280 | 1290 | 1300 | 1316 |
|                                                         | (1)    | -----                                                                                           |      |      |      |      |      |      |      |      |      |
|                                                         | (1223) | CTCATGAAGTGTGATCATTGTGGTGAACTTCATGGCAGACGGGCGATTTTGTAAAGCCACTTGCGAATTTTGTGGCACTGAGAATTTGACTA    |      |      |      |      |      |      |      |      |      |

SARS-CoV-2 & Hepatitis B.apr

|                                                         |        |                                                                                                 |      |      |      |      |      |      |      |      |      |
|---------------------------------------------------------|--------|-------------------------------------------------------------------------------------------------|------|------|------|------|------|------|------|------|------|
|                                                         |        | Section 15                                                                                      |      |      |      |      |      |      |      |      |      |
| Hepatitis B virus NC_003977.2<br>SARS-CoV-2 NC_045512.2 | (1317) | 1317                                                                                            | 1330 | 1340 | 1350 | 1360 | 1370 | 1380 | 1390 | 1400 | 1410 |
|                                                         | (1)    | -----                                                                                           |      |      |      |      |      |      |      |      |      |
|                                                         | (1317) | AAGAAGGTGCCACTACTTGTGGTTACTTACCCCAAATGCTGTTGTTAAAATTTATTGTCCAGCATGTCACAATTCAGAAGTAGGACCTGAGCA   |      |      |      |      |      |      |      |      |      |
|                                                         |        | Section 16                                                                                      |      |      |      |      |      |      |      |      |      |
| Hepatitis B virus NC_003977.2<br>SARS-CoV-2 NC_045512.2 | (1411) | 1411                                                                                            | 1420 | 1430 | 1440 | 1450 | 1460 | 1470 | 1480 | 1490 | 1504 |
|                                                         | (1)    | -----                                                                                           |      |      |      |      |      |      |      |      |      |
|                                                         | (1411) | TAGTCTTGCCGAATACCATAATGAATCTGGCTTGAAAACCATTCCTTCGTAAGGGTGGTCGCACTATTGCCTTTGGAGGCTGTGTGTTCTCTTAT |      |      |      |      |      |      |      |      |      |
|                                                         |        | Section 17                                                                                      |      |      |      |      |      |      |      |      |      |
| Hepatitis B virus NC_003977.2<br>SARS-CoV-2 NC_045512.2 | (1505) | 1505                                                                                            | 1510 | 1520 | 1530 | 1540 | 1550 | 1560 | 1570 | 1580 | 1598 |
|                                                         | (1)    | -----                                                                                           |      |      |      |      |      |      |      |      |      |
|                                                         | (1505) | GTTGGTTGCCATAACAAGTGTGCCTATTGGGTTCCACGTGCTAGCGCTAACATAGGTTGTAACCATACAGGTGTTGTTGGAGAAGGTTCCGAAG  |      |      |      |      |      |      |      |      |      |
|                                                         |        | Section 18                                                                                      |      |      |      |      |      |      |      |      |      |
| Hepatitis B virus NC_003977.2<br>SARS-CoV-2 NC_045512.2 | (1599) | 1599                                                                                            | 1610 | 1620 | 1630 | 1640 | 1650 | 1660 | 1670 | 1680 | 1692 |
|                                                         | (1)    | -----                                                                                           |      |      |      |      |      |      |      |      |      |
|                                                         | (1599) | GTCTTAATGACAACCTTCTTGAAATACTCCAAAAAGAGAAAGTCAACATCAATATTGTTGGTGACTTTAACTTAATGAAGAGATCGCCATTAT   |      |      |      |      |      |      |      |      |      |
|                                                         |        | Section 19                                                                                      |      |      |      |      |      |      |      |      |      |
| Hepatitis B virus NC_003977.2<br>SARS-CoV-2 NC_045512.2 | (1693) | 1693                                                                                            | 1700 | 1710 | 1720 | 1730 | 1740 | 1750 | 1760 | 1770 | 1786 |
|                                                         | (1)    | -----                                                                                           |      |      |      |      |      |      |      |      |      |
|                                                         | (1693) | TTTGGCATCTTTTTCTGCTTCCACAAGTGCTTTTTGTGGAACTGTGAAAGGTTTGGATTATAAAGCATTCAAACAAATTGTTGAATCCTGTGGT  |      |      |      |      |      |      |      |      |      |
|                                                         |        | Section 20                                                                                      |      |      |      |      |      |      |      |      |      |
| Hepatitis B virus NC_003977.2<br>SARS-CoV-2 NC_045512.2 | (1787) | 1787                                                                                            | 1800 | 1810 | 1820 | 1830 | 1840 | 1850 | 1860 | 1870 | 1880 |
|                                                         | (1)    | -----                                                                                           |      |      |      |      |      |      |      |      |      |
|                                                         | (1787) | AATTTTAAAGTTACAAAAGGAAAAGCTAAAAAAGGTGCCTGGAATATTGGTGAACAGAAATCAATACTGAGTCCTCTTTATGCATTTGCATCAG  |      |      |      |      |      |      |      |      |      |
|                                                         |        | Section 21                                                                                      |      |      |      |      |      |      |      |      |      |
| Hepatitis B virus NC_003977.2<br>SARS-CoV-2 NC_045512.2 | (1881) | 1881                                                                                            | 1890 | 1900 | 1910 | 1920 | 1930 | 1940 | 1950 | 1960 | 1974 |
|                                                         | (1)    | -----                                                                                           |      |      |      |      |      |      |      |      |      |
|                                                         | (1881) | AGGCTGCTCGTGTTGTACGATCAATTTTCTCCCGCACTCTTGAACTGCTCAAAATTCTGTGCGTGTTTTACAGAAGGCCGCTATAACAATACT   |      |      |      |      |      |      |      |      |      |

SARS-CoV-2 & Hepatitis B.apr

|                                                         |        |                                                                                                  |      |      |      |      |      |      |      |      |      |
|---------------------------------------------------------|--------|--------------------------------------------------------------------------------------------------|------|------|------|------|------|------|------|------|------|
|                                                         |        | Section 22                                                                                       |      |      |      |      |      |      |      |      |      |
| Hepatitis B virus NC_003977.2<br>SARS-CoV-2 NC_045512.2 | (1975) | 1975                                                                                             | 1980 | 1990 | 2000 | 2010 | 2020 | 2030 | 2040 | 2050 | 2068 |
|                                                         | (1)    | -----                                                                                            |      |      |      |      |      |      |      |      |      |
|                                                         | (1975) | AGATGGAATTTACAGTATTCACACTGAGACTCATTGATGCTATGATGTTACATCTGATTTGGCTACTAACAATCTAGTTGTAATGGCCTACATT   |      |      |      |      |      |      |      |      |      |
|                                                         | (1)    | -----                                                                                            |      |      |      |      |      |      |      |      |      |
|                                                         |        | Section 23                                                                                       |      |      |      |      |      |      |      |      |      |
| Hepatitis B virus NC_003977.2<br>SARS-CoV-2 NC_045512.2 | (2069) | 2069                                                                                             | 2080 | 2090 | 2100 | 2110 | 2120 | 2130 | 2140 | 2150 | 2162 |
|                                                         | (1)    | -----                                                                                            |      |      |      |      |      |      |      |      |      |
|                                                         | (2069) | ACAGGTGGTGTGTTTCAGTTGACTTCGCAGTGGCTAACTAACATCTTTGGCACTGTTTATGAAAACTCAAACCCGTCCTTGATTGGCTTGAAG    |      |      |      |      |      |      |      |      |      |
|                                                         | (1)    | -----                                                                                            |      |      |      |      |      |      |      |      |      |
|                                                         |        | Section 24                                                                                       |      |      |      |      |      |      |      |      |      |
| Hepatitis B virus NC_003977.2<br>SARS-CoV-2 NC_045512.2 | (2163) | 2163                                                                                             | 2170 | 2180 | 2190 | 2200 | 2210 | 2220 | 2230 | 2240 | 2256 |
|                                                         | (1)    | -----                                                                                            |      |      |      |      |      |      |      |      |      |
|                                                         | (2163) | AGAAGTTTAAGGAAGGTGTAGAGTTTCTTAGAGACGGTTGGGAAATTGTTAAATTTATCTCAACCTGTGCTTGTGAAATTGTCGGTGGACAAAT   |      |      |      |      |      |      |      |      |      |
|                                                         | (1)    | -----                                                                                            |      |      |      |      |      |      |      |      |      |
|                                                         |        | Section 25                                                                                       |      |      |      |      |      |      |      |      |      |
| Hepatitis B virus NC_003977.2<br>SARS-CoV-2 NC_045512.2 | (2257) | 2257                                                                                             | 2270 | 2280 | 2290 | 2300 | 2310 | 2320 | 2330 | 2340 | 2350 |
|                                                         | (1)    | -----                                                                                            |      |      |      |      |      |      |      |      |      |
|                                                         | (2257) | TGTCACCTGTGCAAAGGAAATTAAGGAGAGTGTTTCAGACATTCTTTAAGCTTGTAATAAATTTTTGGCTTTGTGTGCTGACTCTATCATTATT   |      |      |      |      |      |      |      |      |      |
|                                                         | (1)    | -----                                                                                            |      |      |      |      |      |      |      |      |      |
|                                                         |        | Section 26                                                                                       |      |      |      |      |      |      |      |      |      |
| Hepatitis B virus NC_003977.2<br>SARS-CoV-2 NC_045512.2 | (2351) | 2351                                                                                             | 2360 | 2370 | 2380 | 2390 | 2400 | 2410 | 2420 | 2430 | 2444 |
|                                                         | (1)    | -----                                                                                            |      |      |      |      |      |      |      |      |      |
|                                                         | (2351) | GGTGGAGCTAAACTTAAAGCCTTGAATTTAGGTGAAACATTTGTCACGCACTCAAAGGGATTGTACAGAAAGTGTGTTAAATCCAGAGAAGAAA   |      |      |      |      |      |      |      |      |      |
|                                                         | (1)    | -----                                                                                            |      |      |      |      |      |      |      |      |      |
|                                                         |        | Section 27                                                                                       |      |      |      |      |      |      |      |      |      |
| Hepatitis B virus NC_003977.2<br>SARS-CoV-2 NC_045512.2 | (2445) | 2445                                                                                             | 2450 | 2460 | 2470 | 2480 | 2490 | 2500 | 2510 | 2520 | 2538 |
|                                                         | (1)    | -----                                                                                            |      |      |      |      |      |      |      |      |      |
|                                                         | (2445) | CTGGCCTACTCATGCCTCTAAAAGCCCCAAAAGAAATTATCTTCTTAGAGGGAGAAACACTTCCACAGAAGTGTTAACAGAGGAAGTTGTCTT    |      |      |      |      |      |      |      |      |      |
|                                                         | (1)    | -----                                                                                            |      |      |      |      |      |      |      |      |      |
|                                                         |        | Section 28                                                                                       |      |      |      |      |      |      |      |      |      |
| Hepatitis B virus NC_003977.2<br>SARS-CoV-2 NC_045512.2 | (2539) | 2539                                                                                             | 2550 | 2560 | 2570 | 2580 | 2590 | 2600 | 2610 | 2620 | 2632 |
|                                                         | (1)    | -----                                                                                            |      |      |      |      |      |      |      |      |      |
|                                                         | (2539) | GAAAACCTGGTGATTTACAACCATTAGAACAACCTACTAGTGAAGCTGTTGAAGCTCCATTGGTTGGTACACCAGTTTGTATTAAACGGGCTTATG |      |      |      |      |      |      |      |      |      |
|                                                         | (1)    | -----                                                                                            |      |      |      |      |      |      |      |      |      |

SARS-CoV-2 & Hepatitis B.apr

|                                                         |        |                                                                                                 |      |      |      |      |      |      |      |      |
|---------------------------------------------------------|--------|-------------------------------------------------------------------------------------------------|------|------|------|------|------|------|------|------|
| Section 29                                              |        |                                                                                                 |      |      |      |      |      |      |      |      |
| Hepatitis B virus NC_003977.2<br>SARS-CoV-2 NC_045512.2 | (2633) | 2633                                                                                            | 2640 | 2650 | 2660 | 2670 | 2680 | 2690 | 2700 | 2710 |
|                                                         | (1)    | -----                                                                                           |      |      |      |      |      |      |      |      |
|                                                         | (2633) | TTGCTCGAAATCAAAGACACAGAAAAGTACTGTGCCCTTGACACCTAATATGATGGTAACAAACAATACCTTCACACTCAAAGGCGGTGCACCAA |      |      |      |      |      |      |      |      |
| Section 30                                              |        |                                                                                                 |      |      |      |      |      |      |      |      |
| Hepatitis B virus NC_003977.2<br>SARS-CoV-2 NC_045512.2 | (2727) | 2727                                                                                            | 2740 | 2750 | 2760 | 2770 | 2780 | 2790 | 2800 | 2810 |
|                                                         | (1)    | -----                                                                                           |      |      |      |      |      |      |      |      |
|                                                         | (2727) | CAAAGGTTACTTTTGGTGATGACACTGTGATAGAAGTGCAAGGTTACAAGAGTGTGAATATCACTTTTGAAGTTGATGAAAGGATTGATAAAGT  |      |      |      |      |      |      |      |      |
| Section 31                                              |        |                                                                                                 |      |      |      |      |      |      |      |      |
| Hepatitis B virus NC_003977.2<br>SARS-CoV-2 NC_045512.2 | (2821) | 2821                                                                                            | 2830 | 2840 | 2850 | 2860 | 2870 | 2880 | 2890 | 2900 |
|                                                         | (1)    | -----                                                                                           |      |      |      |      |      |      |      |      |
|                                                         | (2821) | ACTTAATGAGAAGTGCTCTGCCTATACAGTTGAACTCGGTACAGAAGTAAATGAGTTGCGCTGTGTTGTGGCAGATGCTGTCATAAAAACTTTG  |      |      |      |      |      |      |      |      |
| Section 32                                              |        |                                                                                                 |      |      |      |      |      |      |      |      |
| Hepatitis B virus NC_003977.2<br>SARS-CoV-2 NC_045512.2 | (2915) | 2915                                                                                            | 2920 | 2930 | 2940 | 2950 | 2960 | 2970 | 2980 | 2990 |
|                                                         | (1)    | -----                                                                                           |      |      |      |      |      |      |      |      |
|                                                         | (2915) | CAACCAGTATCTGAATTACTTACACCACTGGGCATTGATTTAGATGAGTGGAGTATGGCTACATACTACTTATTTGATGAGTCTGGTGAGTTTA  |      |      |      |      |      |      |      |      |
| Section 33                                              |        |                                                                                                 |      |      |      |      |      |      |      |      |
| Hepatitis B virus NC_003977.2<br>SARS-CoV-2 NC_045512.2 | (3009) | 3009                                                                                            | 3020 | 3030 | 3040 | 3050 | 3060 | 3070 | 3080 | 3090 |
|                                                         | (1)    | -----                                                                                           |      |      |      |      |      |      |      |      |
|                                                         | (3009) | AATTGGCTTCACATATGTATTGTTCTTTCTACCCTCCAGATGAGGATGAAGAAGAAGGTGATTGTGAAGAAGAAGAGTTTGAGCCATCAACTCA  |      |      |      |      |      |      |      |      |
| Section 34                                              |        |                                                                                                 |      |      |      |      |      |      |      |      |
| Hepatitis B virus NC_003977.2<br>SARS-CoV-2 NC_045512.2 | (3103) | 3103                                                                                            | 3110 | 3120 | 3130 | 3140 | 3150 | 3160 | 3170 | 3180 |
|                                                         | (1)    | -----                                                                                           |      |      |      |      |      |      |      |      |
|                                                         | (3103) | ATATGAGTATGGTACTGAAGATGATTACCAAGGTAAACCTTTGGAATTTGGTGCCACTTCTGCTGCTCTTCAACCTGAAGAAGAGCAAGAAGAA  |      |      |      |      |      |      |      |      |
| Section 35                                              |        |                                                                                                 |      |      |      |      |      |      |      |      |
| Hepatitis B virus NC_003977.2<br>SARS-CoV-2 NC_045512.2 | (3197) | 3197                                                                                            | 3210 | 3220 | 3230 | 3240 | 3250 | 3260 | 3270 | 3280 |
|                                                         | (1)    | -----                                                                                           |      |      |      |      |      |      |      |      |
|                                                         | (3197) | GATTGGTTAGATGATGATAGTCAACAACTGTTGGTCAACAAGACGGCAGTGAGGACAATCAGACAACTACTATTCAAACAATTGTTGAGGTTTC  |      |      |      |      |      |      |      |      |

SARS-CoV-2 & Hepatitis B.apr

|                                                         |        |                                                                                                  |      |      |      |      |      |      |      |      |      |
|---------------------------------------------------------|--------|--------------------------------------------------------------------------------------------------|------|------|------|------|------|------|------|------|------|
|                                                         |        | Section 36                                                                                       |      |      |      |      |      |      |      |      |      |
| Hepatitis B virus NC_003977.2<br>SARS-CoV-2 NC_045512.2 | (3291) | 3291                                                                                             | 3300 | 3310 | 3320 | 3330 | 3340 | 3350 | 3360 | 3370 | 3384 |
|                                                         | (1)    | -----                                                                                            |      |      |      |      |      |      |      |      |      |
|                                                         | (3291) | AACCTCAATTAGAGATGGAACTTACACCAGTTGTTTCAGACTATTGAAGTGAATAGTTTTAGTGGTTATTTAAACTTACTGACAATGTATACAT   |      |      |      |      |      |      |      |      |      |
|                                                         |        | Section 37                                                                                       |      |      |      |      |      |      |      |      |      |
| Hepatitis B virus NC_003977.2<br>SARS-CoV-2 NC_045512.2 | (3385) | 3385                                                                                             | 3390 | 3400 | 3410 | 3420 | 3430 | 3440 | 3450 | 3460 | 3478 |
|                                                         | (1)    | -----                                                                                            |      |      |      |      |      |      |      |      |      |
|                                                         | (3385) | TAAAAATGCAGACATTGTGGGAAGAAGCTAAAAAGGTAAACCAACAGTGGTTGTTAATGCAGCCAATGTTTACCTTAAACATGGAGGAGGTGTT   |      |      |      |      |      |      |      |      |      |
|                                                         |        | Section 38                                                                                       |      |      |      |      |      |      |      |      |      |
| Hepatitis B virus NC_003977.2<br>SARS-CoV-2 NC_045512.2 | (3479) | 3479                                                                                             | 3490 | 3500 | 3510 | 3520 | 3530 | 3540 | 3550 | 3560 | 3572 |
|                                                         | (1)    | -----                                                                                            |      |      |      |      |      |      |      |      |      |
|                                                         | (3479) | GCAGGAGCCTTAAATAAGGCTACTAACAATGCCATGCAAGTTGAATCTGATGATTACATAGCTACTAATGGACCACTTAAAGTGGGTGGTAGTT   |      |      |      |      |      |      |      |      |      |
|                                                         |        | Section 39                                                                                       |      |      |      |      |      |      |      |      |      |
| Hepatitis B virus NC_003977.2<br>SARS-CoV-2 NC_045512.2 | (3573) | 3573                                                                                             | 3580 | 3590 | 3600 | 3610 | 3620 | 3630 | 3640 | 3650 | 3666 |
|                                                         | (1)    | -----                                                                                            |      |      |      |      |      |      |      |      |      |
|                                                         | (3573) | GTGTTTTAAGCGGACACAATCTTGCTAAACACTGTCTTCATGTTGTGCGGCCCAAATGTTAACAAGGTGAAGACATTCAACTTCTTAAGAGTGC   |      |      |      |      |      |      |      |      |      |
|                                                         |        | Section 40                                                                                       |      |      |      |      |      |      |      |      |      |
| Hepatitis B virus NC_003977.2<br>SARS-CoV-2 NC_045512.2 | (3667) | 3667                                                                                             | 3680 | 3690 | 3700 | 3710 | 3720 | 3730 | 3740 | 3750 | 3760 |
|                                                         | (1)    | -----                                                                                            |      |      |      |      |      |      |      |      |      |
|                                                         | (3667) | TTATGAAAATTTAATCAGCACGAAGTTCTACTTGCACCATTATTATCAGCTGGTATTTTTGGTGCTGACCCTATACATTCTTTAAGAGTTTGT    |      |      |      |      |      |      |      |      |      |
|                                                         |        | Section 41                                                                                       |      |      |      |      |      |      |      |      |      |
| Hepatitis B virus NC_003977.2<br>SARS-CoV-2 NC_045512.2 | (3761) | 3761                                                                                             | 3770 | 3780 | 3790 | 3800 | 3810 | 3820 | 3830 | 3840 | 3854 |
|                                                         | (1)    | -----                                                                                            |      |      |      |      |      |      |      |      |      |
|                                                         | (3761) | GTAGATACTGTTTCGCACAAATGTCTACTTAGCTGTCTTTGATAAAAAATCTCTATGACAAACTTGTTTCAAGCTTTTTGGAAATGAAGAGTGAAA |      |      |      |      |      |      |      |      |      |
|                                                         |        | Section 42                                                                                       |      |      |      |      |      |      |      |      |      |
| Hepatitis B virus NC_003977.2<br>SARS-CoV-2 NC_045512.2 | (3855) | 3855                                                                                             | 3860 | 3870 | 3880 | 3890 | 3900 | 3910 | 3920 | 3930 | 3948 |
|                                                         | (1)    | -----                                                                                            |      |      |      |      |      |      |      |      |      |
|                                                         | (3855) | AGCAAGTTGAACAAAAGATCGCTGAGATTCTTAAAGAGGAAGTTAAGCCATTTATAACTGAAAGTAAACCTTCAGTTGAACAGAGAAAACAAGA   |      |      |      |      |      |      |      |      |      |

SARS-CoV-2 & Hepatitis B.apr

|                                                         |        |                                                                                                  |      |      |      |      |      |      |      |      |            |
|---------------------------------------------------------|--------|--------------------------------------------------------------------------------------------------|------|------|------|------|------|------|------|------|------------|
|                                                         |        |                                                                                                  |      |      |      |      |      |      |      |      | Section 43 |
| Hepatitis B virus NC_003977.2<br>SARS-CoV-2 NC_045512.2 | (3949) | 3949                                                                                             | 3960 | 3970 | 3980 | 3990 | 4000 | 4010 | 4020 | 4030 | 4042       |
|                                                         | (1)    | -----                                                                                            |      |      |      |      |      |      |      |      |            |
|                                                         | (3949) | TGATAAGAAAATCAAAGCTTGTGTTGAAGAAGTTACAACAACCTCTGGAAGAACTAAGTTCCTCACAGAAAACCTTGTTACTTTATATTGACATT  |      |      |      |      |      |      |      |      |            |
|                                                         |        |                                                                                                  |      |      |      |      |      |      |      |      | Section 44 |
| Hepatitis B virus NC_003977.2<br>SARS-CoV-2 NC_045512.2 | (4043) | 4043                                                                                             | 4050 | 4060 | 4070 | 4080 | 4090 | 4100 | 4110 | 4120 | 4136       |
|                                                         | (1)    | -----                                                                                            |      |      |      |      |      |      |      |      |            |
|                                                         | (4043) | AATGGCAATCTTCATCCAGATTCTGCCACTCTTGTTAGTGACATTGACATCACTTTCTTAAAGAAAGATGCTCCATATATAGTGGGTGATGTTG   |      |      |      |      |      |      |      |      |            |
|                                                         |        |                                                                                                  |      |      |      |      |      |      |      |      | Section 45 |
| Hepatitis B virus NC_003977.2<br>SARS-CoV-2 NC_045512.2 | (4137) | 4137                                                                                             | 4150 | 4160 | 4170 | 4180 | 4190 | 4200 | 4210 | 4220 | 4230       |
|                                                         | (1)    | -----                                                                                            |      |      |      |      |      |      |      |      |            |
|                                                         | (4137) | TTCAAGAGGGTGTTTTAACTGCTGTGGTTATACCTACTAAAAAGGCTGGTGGCACTACTGAAATGCTAGCGAAAGCTTTGAGAAAAGTGCCAAC   |      |      |      |      |      |      |      |      |            |
|                                                         |        |                                                                                                  |      |      |      |      |      |      |      |      | Section 46 |
| Hepatitis B virus NC_003977.2<br>SARS-CoV-2 NC_045512.2 | (4231) | 4231                                                                                             | 4240 | 4250 | 4260 | 4270 | 4280 | 4290 | 4300 | 4310 | 4324       |
|                                                         | (1)    | -----                                                                                            |      |      |      |      |      |      |      |      |            |
|                                                         | (4231) | AGACAATTATATAACCACTTACCCGGGTCAGGGTTTTAAATGGTTACACTGTAGAGGAGGCAAAGACAGTGCTTAAAAAGTGTAAGAGTGCCCTTT |      |      |      |      |      |      |      |      |            |
|                                                         |        |                                                                                                  |      |      |      |      |      |      |      |      | Section 47 |
| Hepatitis B virus NC_003977.2<br>SARS-CoV-2 NC_045512.2 | (4325) | 4325                                                                                             | 4330 | 4340 | 4350 | 4360 | 4370 | 4380 | 4390 | 4400 | 4418       |
|                                                         | (1)    | -----                                                                                            |      |      |      |      |      |      |      |      |            |
|                                                         | (4325) | TACATTCTACCATCTATTATCTCTAATGAGAAGCAAGAAATTCTTGGAAGTGTCTTCTTGAATTTGCGAGAAATGCTTGACATGCAGAAGAAA    |      |      |      |      |      |      |      |      |            |
|                                                         |        |                                                                                                  |      |      |      |      |      |      |      |      | Section 48 |
| Hepatitis B virus NC_003977.2<br>SARS-CoV-2 NC_045512.2 | (4419) | 4419                                                                                             | 4430 | 4440 | 4450 | 4460 | 4470 | 4480 | 4490 | 4500 | 4512       |
|                                                         | (1)    | -----                                                                                            |      |      |      |      |      |      |      |      |            |
|                                                         | (4419) | CACGCAAATTAATGCCTGTCTGTGTGGAACTAAAGCCATAGTTTCAACTATACAGCGTAAATATAAGGGTATTAAAATACAAGAGGGTGTGGT    |      |      |      |      |      |      |      |      |            |
|                                                         |        |                                                                                                  |      |      |      |      |      |      |      |      | Section 49 |
| Hepatitis B virus NC_003977.2<br>SARS-CoV-2 NC_045512.2 | (4513) | 4513                                                                                             | 4520 | 4530 | 4540 | 4550 | 4560 | 4570 | 4580 | 4590 | 4606       |
|                                                         | (1)    | -----                                                                                            |      |      |      |      |      |      |      |      |            |
|                                                         | (4513) | TGATTATGGTGCTAGATTTTACTTTTACACCAGTAAACAACCTGTAGCGTCACTTATCAACACACTTAACGATCTAAATGAAACTCTTGTTACA   |      |      |      |      |      |      |      |      |            |

## SARS-CoV-2 &amp; Hepatitis B.apr

|                                                         |        |                                                                                                 |      |      |      |      |      |      |      |      |      |
|---------------------------------------------------------|--------|-------------------------------------------------------------------------------------------------|------|------|------|------|------|------|------|------|------|
|                                                         |        | Section 50                                                                                      |      |      |      |      |      |      |      |      |      |
| Hepatitis B virus NC_003977.2<br>SARS-CoV-2 NC_045512.2 | (4607) | 4607                                                                                            | 4620 | 4630 | 4640 | 4650 | 4660 | 4670 | 4680 | 4690 | 4700 |
|                                                         | (1)    | -----                                                                                           |      |      |      |      |      |      |      |      |      |
|                                                         | (4607) | ATGCCACTTGGCTATGTAACACATGGCTTAAATTTGGAAGAAGCTGCTCGGTATATGAGATCTCTCAAAGTGCCAGCTACAGTTTCTGTTTCTT  |      |      |      |      |      |      |      |      |      |
|                                                         |        | Section 51                                                                                      |      |      |      |      |      |      |      |      |      |
| Hepatitis B virus NC_003977.2<br>SARS-CoV-2 NC_045512.2 | (4701) | 4701                                                                                            | 4710 | 4720 | 4730 | 4740 | 4750 | 4760 | 4770 | 4780 | 4794 |
|                                                         | (1)    | -----                                                                                           |      |      |      |      |      |      |      |      |      |
|                                                         | (4701) | CACCTGATGCTGTTACAGCGTATAATGGTTATCTTACTTCTTCTTCTAAAACACCTGAAGAACATTTTATTGAAACCATCTCACTTGCTGGTTC  |      |      |      |      |      |      |      |      |      |
|                                                         |        | Section 52                                                                                      |      |      |      |      |      |      |      |      |      |
| Hepatitis B virus NC_003977.2<br>SARS-CoV-2 NC_045512.2 | (4795) | 4795                                                                                            | 4800 | 4810 | 4820 | 4830 | 4840 | 4850 | 4860 | 4870 | 4888 |
|                                                         | (1)    | -----                                                                                           |      |      |      |      |      |      |      |      |      |
|                                                         | (4795) | CTATAAAGATTGGTCCTATTCTGGACAATCTACACAACCTAGGTATAGAATTTCTTAAGAGAGGTGATAAAAGTGTATATTACACTAGTAATCCT |      |      |      |      |      |      |      |      |      |
|                                                         |        | Section 53                                                                                      |      |      |      |      |      |      |      |      |      |
| Hepatitis B virus NC_003977.2<br>SARS-CoV-2 NC_045512.2 | (4889) | 4889                                                                                            | 4900 | 4910 | 4920 | 4930 | 4940 | 4950 | 4960 | 4970 | 4982 |
|                                                         | (1)    | -----                                                                                           |      |      |      |      |      |      |      |      |      |
|                                                         | (4889) | ACCACATTCCACCTAGATGGTGAAGTTATCACCTTTGACAATCTTAAGACACTTCTTTCTTTGAGAGAAGTGAGGACTATTAAGGTGTTTACAA  |      |      |      |      |      |      |      |      |      |
|                                                         |        | Section 54                                                                                      |      |      |      |      |      |      |      |      |      |
| Hepatitis B virus NC_003977.2<br>SARS-CoV-2 NC_045512.2 | (4983) | 4983                                                                                            | 4990 | 5000 | 5010 | 5020 | 5030 | 5040 | 5050 | 5060 | 5076 |
|                                                         | (1)    | -----                                                                                           |      |      |      |      |      |      |      |      |      |
|                                                         | (4983) | CAGTAGACAACATTAACTCCACACGCAAGTTGTGGACATGTCAATGACATATGGACAACAGTTTGGTCCAACCTTATTTGGATGGAGCTGATGT  |      |      |      |      |      |      |      |      |      |
|                                                         |        | Section 55                                                                                      |      |      |      |      |      |      |      |      |      |
| Hepatitis B virus NC_003977.2<br>SARS-CoV-2 NC_045512.2 | (5077) | 5077                                                                                            | 5090 | 5100 | 5110 | 5120 | 5130 | 5140 | 5150 | 5160 | 5170 |
|                                                         | (1)    | -----                                                                                           |      |      |      |      |      |      |      |      |      |
|                                                         | (5077) | TACTAAAATAAAACCTCATAATTCACATGAAGGTAAACATTTTATGTTTTACCTAATGATGACACTCTACGTGTTGAGGCTTTTGAGTACTAC   |      |      |      |      |      |      |      |      |      |
|                                                         |        | Section 56                                                                                      |      |      |      |      |      |      |      |      |      |
| Hepatitis B virus NC_003977.2<br>SARS-CoV-2 NC_045512.2 | (5171) | 5171                                                                                            | 5180 | 5190 | 5200 | 5210 | 5220 | 5230 | 5240 | 5250 | 5264 |
|                                                         | (1)    | -----                                                                                           |      |      |      |      |      |      |      |      |      |
|                                                         | (5171) | CACACAACCTGATCCTAGTTTTCTGGGTAGGTACATGTCAGCATTAATCACAATAAAAGTGGAATACCCACAAGTTAATGGTTTAACTTCTA    |      |      |      |      |      |      |      |      |      |



## SARS-CoV-2 &amp; Hepatitis B.apr

|                                                         |        |                                                                                                 |      |      |      |      |      |      |      |      |      |
|---------------------------------------------------------|--------|-------------------------------------------------------------------------------------------------|------|------|------|------|------|------|------|------|------|
|                                                         |        | Section 57                                                                                      |      |      |      |      |      |      |      |      |      |
| Hepatitis B virus NC_003977.2<br>SARS-CoV-2 NC_045512.2 | (5265) | 5265                                                                                            | 5270 | 5280 | 5290 | 5300 | 5310 | 5320 | 5330 | 5340 | 5358 |
|                                                         | (1)    | -----                                                                                           |      |      |      |      |      |      |      |      |      |
|                                                         | (5265) | TTAAATGGGCAGATAACAACACTGTTATCTTGCCACTGCATTGTTAACTCCAACAAATAGAGTTGAAGTTAATCCACCTGCTCTACAAGATGC   |      |      |      |      |      |      |      |      |      |
|                                                         |        | Section 58                                                                                      |      |      |      |      |      |      |      |      |      |
| Hepatitis B virus NC_003977.2<br>SARS-CoV-2 NC_045512.2 | (5359) | 5359                                                                                            | 5370 | 5380 | 5390 | 5400 | 5410 | 5420 | 5430 | 5440 | 5452 |
|                                                         | (1)    | -----                                                                                           |      |      |      |      |      |      |      |      |      |
|                                                         | (5359) | TTATTACAGAGCAAGGGCTGGTGAAGCTGCTAACTTTTGTGCACTTATCTTAGCCTACTGTAATAAGACAGTAGGTGAGTTAGGTGATGTTAGA  |      |      |      |      |      |      |      |      |      |
|                                                         |        | Section 59                                                                                      |      |      |      |      |      |      |      |      |      |
| Hepatitis B virus NC_003977.2<br>SARS-CoV-2 NC_045512.2 | (5453) | 5453                                                                                            | 5460 | 5470 | 5480 | 5490 | 5500 | 5510 | 5520 | 5530 | 5546 |
|                                                         | (1)    | -----                                                                                           |      |      |      |      |      |      |      |      |      |
|                                                         | (5453) | GAAACAATGAGTTACTTGTTC AACATGCCAATTTAGATTCTTGCAAAAGAGTCTTGAAACGTGGTGTGTAAACTTGTGGACAACAGCAGACAA  |      |      |      |      |      |      |      |      |      |
|                                                         |        | Section 60                                                                                      |      |      |      |      |      |      |      |      |      |
| Hepatitis B virus NC_003977.2<br>SARS-CoV-2 NC_045512.2 | (5547) | 5547                                                                                            | 5560 | 5570 | 5580 | 5590 | 5600 | 5610 | 5620 | 5630 | 5640 |
|                                                         | (1)    | -----                                                                                           |      |      |      |      |      |      |      |      |      |
|                                                         | (5547) | CCCTTAAGGGTGTAGAAGCTGTTATGTACATGGGCACACTTTCTTATGAACAATTTAAGAAAGGTGTTTCAGATACCTTGTACGTGTGGTAAACA |      |      |      |      |      |      |      |      |      |
|                                                         |        | Section 61                                                                                      |      |      |      |      |      |      |      |      |      |
| Hepatitis B virus NC_003977.2<br>SARS-CoV-2 NC_045512.2 | (5641) | 5641                                                                                            | 5650 | 5660 | 5670 | 5680 | 5690 | 5700 | 5710 | 5720 | 5734 |
|                                                         | (1)    | -----                                                                                           |      |      |      |      |      |      |      |      |      |
|                                                         | (5641) | AGCTACAAAATATCTAGTACAACAGGAGTCACCTTTTGTATGATGTCAGCACCACTGCTCAGTATGAACTTAAGCATGGTACATTTACTTTGT   |      |      |      |      |      |      |      |      |      |
|                                                         |        | Section 62                                                                                      |      |      |      |      |      |      |      |      |      |
| Hepatitis B virus NC_003977.2<br>SARS-CoV-2 NC_045512.2 | (5735) | 5735                                                                                            | 5740 | 5750 | 5760 | 5770 | 5780 | 5790 | 5800 | 5810 | 5828 |
|                                                         | (1)    | -----                                                                                           |      |      |      |      |      |      |      |      |      |
|                                                         | (5735) | GCTAGTGAGTACACTGGTAATTACCAGTGTGGTCACTATAAACATATAACTTCTAAAGAACTTTGTATTGCATAGACGGTGCTTTACTTACAA   |      |      |      |      |      |      |      |      |      |
|                                                         |        | Section 63                                                                                      |      |      |      |      |      |      |      |      |      |
| Hepatitis B virus NC_003977.2<br>SARS-CoV-2 NC_045512.2 | (5829) | 5829                                                                                            | 5840 | 5850 | 5860 | 5870 | 5880 | 5890 | 5900 | 5910 | 5922 |
|                                                         | (1)    | -----                                                                                           |      |      |      |      |      |      |      |      |      |
|                                                         | (5829) | AGTCCTCAGAAATACAAAGGTCCTATTACGGATGTTTTCTACAAAGAAAACAGTTACACAACAACCATAAAACCAGTTACTTATAAATTGGATGG |      |      |      |      |      |      |      |      |      |

SARS-CoV-2 & Hepatitis B.apr

|                                                         |        |                                                                                                  |      |      |      |      |      |      |      |      |      |
|---------------------------------------------------------|--------|--------------------------------------------------------------------------------------------------|------|------|------|------|------|------|------|------|------|
|                                                         |        | Section 64                                                                                       |      |      |      |      |      |      |      |      |      |
| Hepatitis B virus NC_003977.2<br>SARS-CoV-2 NC_045512.2 | (5923) | 5923                                                                                             | 5930 | 5940 | 5950 | 5960 | 5970 | 5980 | 5990 | 6000 | 6016 |
|                                                         | (1)    | -----                                                                                            |      |      |      |      |      |      |      |      |      |
|                                                         | (5923) | TGTTGTTTGTACAGAAATTGACCCCTAAGTTGGACAATTATTATAAGAAAGACAATTCTTATTTTCACAGAGCAACCAATTGATCTTGTACCAAAC |      |      |      |      |      |      |      |      |      |
|                                                         |        | Section 65                                                                                       |      |      |      |      |      |      |      |      |      |
| Hepatitis B virus NC_003977.2<br>SARS-CoV-2 NC_045512.2 | (6017) | 6017                                                                                             | 6030 | 6040 | 6050 | 6060 | 6070 | 6080 | 6090 | 6100 | 6110 |
|                                                         | (1)    | -----                                                                                            |      |      |      |      |      |      |      |      |      |
|                                                         | (6017) | CAACCATATCCAAACGCAAGCTTCGATAATTTTAAGTTTGTATGTGATAATATCAAATTTGCTGATGATTTAAACCAGTTAACTGGTTATAAGA   |      |      |      |      |      |      |      |      |      |
|                                                         |        | Section 66                                                                                       |      |      |      |      |      |      |      |      |      |
| Hepatitis B virus NC_003977.2<br>SARS-CoV-2 NC_045512.2 | (6111) | 6111                                                                                             | 6120 | 6130 | 6140 | 6150 | 6160 | 6170 | 6180 | 6190 | 6204 |
|                                                         | (1)    | -----                                                                                            |      |      |      |      |      |      |      |      |      |
|                                                         | (6111) | AACCTGCTTCAAGAGAGCTTAAAGTTACATTTTTCCCTGACTTAAATGGTGATGTGGTGGCTATTGATTATAAACACTACACACCCTCTTTTAA   |      |      |      |      |      |      |      |      |      |
|                                                         |        | Section 67                                                                                       |      |      |      |      |      |      |      |      |      |
| Hepatitis B virus NC_003977.2<br>SARS-CoV-2 NC_045512.2 | (6205) | 6205                                                                                             | 6210 | 6220 | 6230 | 6240 | 6250 | 6260 | 6270 | 6280 | 6298 |
|                                                         | (1)    | -----                                                                                            |      |      |      |      |      |      |      |      |      |
|                                                         | (6205) | GAAAGGAGCTAAATTGTTACATAAACCTATTGTTTGGCATGTTAACAATGCAACTAATAAAGCCACGTATAAACCAAATACCTGGTGTATACGT   |      |      |      |      |      |      |      |      |      |
|                                                         |        | Section 68                                                                                       |      |      |      |      |      |      |      |      |      |
| Hepatitis B virus NC_003977.2<br>SARS-CoV-2 NC_045512.2 | (6299) | 6299                                                                                             | 6310 | 6320 | 6330 | 6340 | 6350 | 6360 | 6370 | 6380 | 6392 |
|                                                         | (1)    | -----                                                                                            |      |      |      |      |      |      |      |      |      |
|                                                         | (6299) | TGTCTTTGGAGCACAAAACCAGTTGAAACATCAAATTCGTTTGATGTACTGAAGTCAGAGGACGCGCAGGGAATGGATAATCTTGCCTGCGAAG   |      |      |      |      |      |      |      |      |      |
|                                                         |        | Section 69                                                                                       |      |      |      |      |      |      |      |      |      |
| Hepatitis B virus NC_003977.2<br>SARS-CoV-2 NC_045512.2 | (6393) | 6393                                                                                             | 6400 | 6410 | 6420 | 6430 | 6440 | 6450 | 6460 | 6470 | 6486 |
|                                                         | (1)    | -----                                                                                            |      |      |      |      |      |      |      |      |      |
|                                                         | (6393) | ATCTAAAACCAGTCTCTGAAGAAGTAGTGGAAAATCCTACCATACAGAAAGACGTTCTTGAGTGTAATGTGAAAACCTACCGAAGTTGTAGGAGA  |      |      |      |      |      |      |      |      |      |
|                                                         |        | Section 70                                                                                       |      |      |      |      |      |      |      |      |      |
| Hepatitis B virus NC_003977.2<br>SARS-CoV-2 NC_045512.2 | (6487) | 6487                                                                                             | 6500 | 6510 | 6520 | 6530 | 6540 | 6550 | 6560 | 6570 | 6580 |
|                                                         | (1)    | -----                                                                                            |      |      |      |      |      |      |      |      |      |
|                                                         | (6487) | CATTATACTTAAACCAGCAAATAATAGTTTAAAAATTACAGAAGAGGTTGGCCACACAGATCTAATGGCTGCTTATGTAGACAATTCTAGTCTT   |      |      |      |      |      |      |      |      |      |

SARS-CoV-2 & Hepatitis B.apr

|                                                         |        |                                                                                                 |      |      |      |      |      |      |      |      |      |
|---------------------------------------------------------|--------|-------------------------------------------------------------------------------------------------|------|------|------|------|------|------|------|------|------|
|                                                         |        | Section 71                                                                                      |      |      |      |      |      |      |      |      |      |
| Hepatitis B virus NC_003977.2<br>SARS-CoV-2 NC_045512.2 | (6581) | 6581                                                                                            | 6590 | 6600 | 6610 | 6620 | 6630 | 6640 | 6650 | 6660 | 6674 |
|                                                         | (1)    | -----                                                                                           |      |      |      |      |      |      |      |      |      |
|                                                         | (6581) | ACTATTAAGAAACCTAATGAATTATCTAGAGTATTAGGTTTGAAAACCTTGCTACTCATGGTTTAGCTGCTGTTAATAGTGTCCCTTGGGATA   |      |      |      |      |      |      |      |      |      |
|                                                         |        | Section 72                                                                                      |      |      |      |      |      |      |      |      |      |
| Hepatitis B virus NC_003977.2<br>SARS-CoV-2 NC_045512.2 | (6675) | 6675                                                                                            | 6680 | 6690 | 6700 | 6710 | 6720 | 6730 | 6740 | 6750 | 6768 |
|                                                         | (1)    | -----                                                                                           |      |      |      |      |      |      |      |      |      |
|                                                         | (6675) | CTATAGCTAATTATGCTAAGCCTTTTCTTAACAAAGTTGTTAGTACAACCTACTAACATAGTTACACGGTGTTTAAACCGTGTTTGTACTAATTA |      |      |      |      |      |      |      |      |      |
|                                                         |        | Section 73                                                                                      |      |      |      |      |      |      |      |      |      |
| Hepatitis B virus NC_003977.2<br>SARS-CoV-2 NC_045512.2 | (6769) | 6769                                                                                            | 6780 | 6790 | 6800 | 6810 | 6820 | 6830 | 6840 | 6850 | 6862 |
|                                                         | (1)    | -----                                                                                           |      |      |      |      |      |      |      |      |      |
|                                                         | (6769) | TATGCCTTATTTCTTTACTTTATTGCTACAATTGTGTACTTTTACTAGAAGTACAAATTCTAGAATTAAAGCATCTATGCCGACTACTATAGCA  |      |      |      |      |      |      |      |      |      |
|                                                         |        | Section 74                                                                                      |      |      |      |      |      |      |      |      |      |
| Hepatitis B virus NC_003977.2<br>SARS-CoV-2 NC_045512.2 | (6863) | 6863                                                                                            | 6870 | 6880 | 6890 | 6900 | 6910 | 6920 | 6930 | 6940 | 6956 |
|                                                         | (1)    | -----                                                                                           |      |      |      |      |      |      |      |      |      |
|                                                         | (6863) | AAGAATACTGTTAAGAGTGTCGGTAAATTTTGTCTAGAGGCTTCATTTAATTATTTGAAGTCACCTAATTTTTCTAACTGATAAATATTATAA   |      |      |      |      |      |      |      |      |      |
|                                                         |        | Section 75                                                                                      |      |      |      |      |      |      |      |      |      |
| Hepatitis B virus NC_003977.2<br>SARS-CoV-2 NC_045512.2 | (6957) | 6957                                                                                            | 6970 | 6980 | 6990 | 7000 | 7010 | 7020 | 7030 | 7040 | 7050 |
|                                                         | (1)    | -----                                                                                           |      |      |      |      |      |      |      |      |      |
|                                                         | (6957) | TTTGGTTTTTACTATTAAAGTGTTTGCCTAGGTTCTTTAATCTACTCAACCGCTGCTTTAGGTGTTTTAATGTCTAATTTAGGCATGCCTTCTTA |      |      |      |      |      |      |      |      |      |
|                                                         |        | Section 76                                                                                      |      |      |      |      |      |      |      |      |      |
| Hepatitis B virus NC_003977.2<br>SARS-CoV-2 NC_045512.2 | (7051) | 7051                                                                                            | 7060 | 7070 | 7080 | 7090 | 7100 | 7110 | 7120 | 7130 | 7144 |
|                                                         | (1)    | -----                                                                                           |      |      |      |      |      |      |      |      |      |
|                                                         | (7051) | CTGTACTGGTTACAGAGAAGGCTATTTGAACCTCTACTAATGTCACTATTGCAACCTACTGTACTGGTTCTATACCTTGTAGTGTTTGTCTTAGT |      |      |      |      |      |      |      |      |      |
|                                                         |        | Section 77                                                                                      |      |      |      |      |      |      |      |      |      |
| Hepatitis B virus NC_003977.2<br>SARS-CoV-2 NC_045512.2 | (7145) | 7145                                                                                            | 7150 | 7160 | 7170 | 7180 | 7190 | 7200 | 7210 | 7220 | 7238 |
|                                                         | (1)    | -----                                                                                           |      |      |      |      |      |      |      |      |      |
|                                                         | (7145) | GGTTTAGATTCTTTAGACACCTATCCTTCTTTAGAACTATACAAATTACCATTTTCATCTTTTAAATGGGATTTAACTGCTTTTGGCTTAGTTG  |      |      |      |      |      |      |      |      |      |

## SARS-CoV-2 &amp; Hepatitis B.apr

|                                                         |        |                                                                                                  |      |      |      |      |      |      |      |      |            |
|---------------------------------------------------------|--------|--------------------------------------------------------------------------------------------------|------|------|------|------|------|------|------|------|------------|
|                                                         |        |                                                                                                  |      |      |      |      |      |      |      |      | Section 78 |
| Hepatitis B virus NC_003977.2<br>SARS-CoV-2 NC_045512.2 | (7239) | 7239                                                                                             | 7250 | 7260 | 7270 | 7280 | 7290 | 7300 | 7310 | 7320 | 7332       |
|                                                         | (1)    | -----                                                                                            |      |      |      |      |      |      |      |      |            |
|                                                         | (7239) | CAGAGTGGTTTTTGGCATATATTCTTTTCACTAGGTTTTTCTATGTACTTGGATTGGCTGCAATCATGCAATTGTTTTTCAGCTATTTTGCAGT   |      |      |      |      |      |      |      |      |            |
|                                                         |        |                                                                                                  |      |      |      |      |      |      |      |      | Section 79 |
| Hepatitis B virus NC_003977.2<br>SARS-CoV-2 NC_045512.2 | (7333) | 7333                                                                                             | 7340 | 7350 | 7360 | 7370 | 7380 | 7390 | 7400 | 7410 | 7426       |
|                                                         | (1)    | -----                                                                                            |      |      |      |      |      |      |      |      |            |
|                                                         | (7333) | ACATTTTATTAGTAATTCTTGGCTTATGTGGTTAATAATTAATCTTGTACAAATGGCCCCGATTTTCAGCTATGGTTAGAATGTACATCTTCTTT  |      |      |      |      |      |      |      |      |            |
|                                                         |        |                                                                                                  |      |      |      |      |      |      |      |      | Section 80 |
| Hepatitis B virus NC_003977.2<br>SARS-CoV-2 NC_045512.2 | (7427) | 7427                                                                                             | 7440 | 7450 | 7460 | 7470 | 7480 | 7490 | 7500 | 7510 | 7520       |
|                                                         | (1)    | -----                                                                                            |      |      |      |      |      |      |      |      |            |
|                                                         | (7427) | GCATCATTTTATTATGTATGGAAAAGTTATGTGCATGTTGTAGACGGTTGTAATTCATCAACTTGTATGATGTGTTACAAACGTAATAGAGCAA   |      |      |      |      |      |      |      |      |            |
|                                                         |        |                                                                                                  |      |      |      |      |      |      |      |      | Section 81 |
| Hepatitis B virus NC_003977.2<br>SARS-CoV-2 NC_045512.2 | (7521) | 7521                                                                                             | 7530 | 7540 | 7550 | 7560 | 7570 | 7580 | 7590 | 7600 | 7614       |
|                                                         | (1)    | -----                                                                                            |      |      |      |      |      |      |      |      |            |
|                                                         | (7521) | CAAGAGTCGAATGTACAACCTATTGTTAATGGTGTTAGAAGGTCCTTTTATGTCTATGCTAATGGAGGTAAAGGCTTTTGCAAACCTACACAATTG |      |      |      |      |      |      |      |      |            |
|                                                         |        |                                                                                                  |      |      |      |      |      |      |      |      | Section 82 |
| Hepatitis B virus NC_003977.2<br>SARS-CoV-2 NC_045512.2 | (7615) | 7615                                                                                             | 7620 | 7630 | 7640 | 7650 | 7660 | 7670 | 7680 | 7690 | 7708       |
|                                                         | (1)    | -----                                                                                            |      |      |      |      |      |      |      |      |            |
|                                                         | (7615) | GAATTGTGTTAATTGTGATACATTCTGTGCTGGTAGTACATTTATTAGTGATGAAGTTGCGAGAGACTTGTCACCTACAGTTTAAAGACCAATA   |      |      |      |      |      |      |      |      |            |
|                                                         |        |                                                                                                  |      |      |      |      |      |      |      |      | Section 83 |
| Hepatitis B virus NC_003977.2<br>SARS-CoV-2 NC_045512.2 | (7709) | 7709                                                                                             | 7720 | 7730 | 7740 | 7750 | 7760 | 7770 | 7780 | 7790 | 7802       |
|                                                         | (1)    | -----                                                                                            |      |      |      |      |      |      |      |      |            |
|                                                         | (7709) | AATCCTACTGACCAGTCTTCTTACATCGTTGATAGTGTTACAGTGAAGAATGGTTCCATCCATCTTTACTTTGATAAAGCTGGTCAAAAGACTT   |      |      |      |      |      |      |      |      |            |
|                                                         |        |                                                                                                  |      |      |      |      |      |      |      |      | Section 84 |
| Hepatitis B virus NC_003977.2<br>SARS-CoV-2 NC_045512.2 | (7803) | 7803                                                                                             | 7810 | 7820 | 7830 | 7840 | 7850 | 7860 | 7870 | 7880 | 7896       |
|                                                         | (1)    | -----                                                                                            |      |      |      |      |      |      |      |      |            |
|                                                         | (7803) | ATGAAAGACATTCTCTCTCATTTTTGTTAACTTAGACAACCTGAGAGCTAATAACACTAAAGGTTTCATTGCCTATTAATGTTATAGTTTTTGA   |      |      |      |      |      |      |      |      |            |

## SARS-CoV-2 &amp; Hepatitis B.apr

|                                                         |        |                                                                                                  |      |      |      |      |      |      |      |      |      |
|---------------------------------------------------------|--------|--------------------------------------------------------------------------------------------------|------|------|------|------|------|------|------|------|------|
|                                                         |        | Section 85                                                                                       |      |      |      |      |      |      |      |      |      |
| Hepatitis B virus NC_003977.2<br>SARS-CoV-2 NC_045512.2 | (7897) | 7897                                                                                             | 7910 | 7920 | 7930 | 7940 | 7950 | 7960 | 7970 | 7980 | 7990 |
|                                                         | (1)    | -----                                                                                            |      |      |      |      |      |      |      |      |      |
|                                                         | (7897) | TGGTAAATCAAAATGTGAAGAATCATCTGCAAAATCAGCGTCTGTTTACTACAGTCAGCTTATGTGTCAACCTATACTGTTACTAGATCAGGCA   |      |      |      |      |      |      |      |      |      |
|                                                         |        | Section 86                                                                                       |      |      |      |      |      |      |      |      |      |
| Hepatitis B virus NC_003977.2<br>SARS-CoV-2 NC_045512.2 | (7991) | 7991                                                                                             | 8000 | 8010 | 8020 | 8030 | 8040 | 8050 | 8060 | 8070 | 8084 |
|                                                         | (1)    | -----                                                                                            |      |      |      |      |      |      |      |      |      |
|                                                         | (7991) | TTAGTGTCCTGATGTTGGTGATAGTGCGGAAGTTGCAGTTAAAATGTTTGATGCTTACGTTAATACGTTTTTCATCAACTTTTAACGTACCAATGG |      |      |      |      |      |      |      |      |      |
|                                                         |        | Section 87                                                                                       |      |      |      |      |      |      |      |      |      |
| Hepatitis B virus NC_003977.2<br>SARS-CoV-2 NC_045512.2 | (8085) | 8085                                                                                             | 8090 | 8100 | 8110 | 8120 | 8130 | 8140 | 8150 | 8160 | 8178 |
|                                                         | (1)    | -----                                                                                            |      |      |      |      |      |      |      |      |      |
|                                                         | (8085) | AAAAACTCAAAACACTAGTTGCAACTGCAGAAGCTGAACTTGCAAAGAATGTGTCCTTAGACAATGTCTTATCTACTTTTATTTTCAGCAGCTCG  |      |      |      |      |      |      |      |      |      |
|                                                         |        | Section 88                                                                                       |      |      |      |      |      |      |      |      |      |
| Hepatitis B virus NC_003977.2<br>SARS-CoV-2 NC_045512.2 | (8179) | 8179                                                                                             | 8190 | 8200 | 8210 | 8220 | 8230 | 8240 | 8250 | 8260 | 8272 |
|                                                         | (1)    | -----                                                                                            |      |      |      |      |      |      |      |      |      |
|                                                         | (8179) | GCAAGGGTTTGTTGATTCAGATGTAGAAACTAAAGATGTTGTTGAATGTCTTAAATTGTCACATCAATCTGACATAGAAGTTACTGGCGATAGT   |      |      |      |      |      |      |      |      |      |
|                                                         |        | Section 89                                                                                       |      |      |      |      |      |      |      |      |      |
| Hepatitis B virus NC_003977.2<br>SARS-CoV-2 NC_045512.2 | (8273) | 8273                                                                                             | 8280 | 8290 | 8300 | 8310 | 8320 | 8330 | 8340 | 8350 | 8366 |
|                                                         | (1)    | -----                                                                                            |      |      |      |      |      |      |      |      |      |
|                                                         | (8273) | TGTAATAACTATATGCTCACCTATAACAAAGTTGAAAACATGACACCCCGTGACCTTGGTGCTTGTATTGACTGTAGTGCGCGTCATATTAATG   |      |      |      |      |      |      |      |      |      |
|                                                         |        | Section 90                                                                                       |      |      |      |      |      |      |      |      |      |
| Hepatitis B virus NC_003977.2<br>SARS-CoV-2 NC_045512.2 | (8367) | 8367                                                                                             | 8380 | 8390 | 8400 | 8410 | 8420 | 8430 | 8440 | 8450 | 8460 |
|                                                         | (1)    | -----                                                                                            |      |      |      |      |      |      |      |      |      |
|                                                         | (8367) | CGCAGGTAGCAAAAAGTCACAACATTGCTTTGATATGGAACGTTAAAGATTTTCATGTCATTGTCTGAACAACCTACGAAAACAAATACGTAGTGC |      |      |      |      |      |      |      |      |      |
|                                                         |        | Section 91                                                                                       |      |      |      |      |      |      |      |      |      |
| Hepatitis B virus NC_003977.2<br>SARS-CoV-2 NC_045512.2 | (8461) | 8461                                                                                             | 8470 | 8480 | 8490 | 8500 | 8510 | 8520 | 8530 | 8540 | 8554 |
|                                                         | (1)    | -----                                                                                            |      |      |      |      |      |      |      |      |      |
|                                                         | (8461) | TGCTAAAAAGAATAACTTACCTTTTAAGTTGACATGTGCAACTACTAGACAAGTTGTTAATGTTGTAACAACAAAGATAGCACTTAAGGGTGGT   |      |      |      |      |      |      |      |      |      |

## SARS-CoV-2 &amp; Hepatitis B.apr

|                                                         |        |                                                                                                 |       |       |       |       |       |       |       |       |       |
|---------------------------------------------------------|--------|-------------------------------------------------------------------------------------------------|-------|-------|-------|-------|-------|-------|-------|-------|-------|
|                                                         |        | Section 92                                                                                      |       |       |       |       |       |       |       |       |       |
| Hepatitis B virus NC_003977.2<br>SARS-CoV-2 NC_045512.2 | (8555) | 8555                                                                                            | 8560  | 8570  | 8580  | 8590  | 8600  | 8610  | 8620  | 8630  | 8648  |
|                                                         | (1)    | -----                                                                                           | ----- | ----- | ----- | ----- | ----- | ----- | ----- | ----- | ----- |
|                                                         | (8555) | AAAATTGTTAATAATTGGTTGAAGCAGTTAATTAAAGTTACACTTGTGTTCTTTTGTGCTGCTATTTTCTATTTAATAACACCTGTTTCATG    |       |       |       |       |       |       |       |       |       |
|                                                         |        | Section 93                                                                                      |       |       |       |       |       |       |       |       |       |
| Hepatitis B virus NC_003977.2<br>SARS-CoV-2 NC_045512.2 | (8649) | 8649                                                                                            | 8660  | 8670  | 8680  | 8690  | 8700  | 8710  | 8720  | 8730  | 8742  |
|                                                         | (1)    | -----                                                                                           | ----- | ----- | ----- | ----- | ----- | ----- | ----- | ----- | ----- |
|                                                         | (8649) | TCATGTCTAAACATACTGACTTTTCAAGTGAAATCATAGGATACAAGGCTATTGATGGTGGTGTCACTCGTGACATAGCATCTACAGATACTTG  |       |       |       |       |       |       |       |       |       |
|                                                         |        | Section 94                                                                                      |       |       |       |       |       |       |       |       |       |
| Hepatitis B virus NC_003977.2<br>SARS-CoV-2 NC_045512.2 | (8743) | 8743                                                                                            | 8750  | 8760  | 8770  | 8780  | 8790  | 8800  | 8810  | 8820  | 8836  |
|                                                         | (1)    | -----                                                                                           | ----- | ----- | ----- | ----- | ----- | ----- | ----- | ----- | ----- |
|                                                         | (8743) | TTTTGCTAACAAACATGCTGATTTTGACACATGGTTTAGCCAGCGTGGTGGTAGTTATACTAATGACAAAGCTTGCCCATTGATTGCTGCAGTC  |       |       |       |       |       |       |       |       |       |
|                                                         |        | Section 95                                                                                      |       |       |       |       |       |       |       |       |       |
| Hepatitis B virus NC_003977.2<br>SARS-CoV-2 NC_045512.2 | (8837) | 8837                                                                                            | 8850  | 8860  | 8870  | 8880  | 8890  | 8900  | 8910  | 8920  | 8930  |
|                                                         | (1)    | -----                                                                                           | ----- | ----- | ----- | ----- | ----- | ----- | ----- | ----- | ----- |
|                                                         | (8837) | ATAACAAGAGAAGTGGGTTTTGTCGTGCCTGGTTTTGCCTGGCAGATATTACGCACAACCTAATGGTGACTTTTTGCATTTCTTACCTAGAGTTT |       |       |       |       |       |       |       |       |       |
|                                                         |        | Section 96                                                                                      |       |       |       |       |       |       |       |       |       |
| Hepatitis B virus NC_003977.2<br>SARS-CoV-2 NC_045512.2 | (8931) | 8931                                                                                            | 8940  | 8950  | 8960  | 8970  | 8980  | 8990  | 9000  | 9010  | 9024  |
|                                                         | (1)    | -----                                                                                           | ----- | ----- | ----- | ----- | ----- | ----- | ----- | ----- | ----- |
|                                                         | (8931) | TTAGTGCAGTTGGTAACATCTGTTACACACCATCAAACTTATAGAGTACACTGACTTTGCAACATCAGCTTGTGTTTTGGCTGCTGAATGTAC   |       |       |       |       |       |       |       |       |       |
|                                                         |        | Section 97                                                                                      |       |       |       |       |       |       |       |       |       |
| Hepatitis B virus NC_003977.2<br>SARS-CoV-2 NC_045512.2 | (9025) | 9025                                                                                            | 9030  | 9040  | 9050  | 9060  | 9070  | 9080  | 9090  | 9100  | 9118  |
|                                                         | (1)    | -----                                                                                           | ----- | ----- | ----- | ----- | ----- | ----- | ----- | ----- | ----- |
|                                                         | (9025) | AATTTTTAAAGATGCTTCTGGTAAGCCAGTACCATATTGTTATGATACCAATGTACTAGAAGGTTCTGTTGCTTATGAAAGTTTACGCCCTGAC  |       |       |       |       |       |       |       |       |       |
|                                                         |        | Section 98                                                                                      |       |       |       |       |       |       |       |       |       |
| Hepatitis B virus NC_003977.2<br>SARS-CoV-2 NC_045512.2 | (9119) | 9119                                                                                            | 9130  | 9140  | 9150  | 9160  | 9170  | 9180  | 9190  | 9200  | 9212  |
|                                                         | (1)    | -----                                                                                           | ----- | ----- | ----- | ----- | ----- | ----- | ----- | ----- | ----- |
|                                                         | (9119) | ACACGTTATGTGCTCATGGATGGCTCTATTATTCAATTTCTTAACACCTACCTTGAAGGTTCTGTTAGAGTGGTAACAACCTTTTGATTCTGAGT |       |       |       |       |       |       |       |       |       |

## SARS-CoV-2 &amp; Hepatitis B.apr

|                                                         |        |                                                                                                  |      |      |      |      |      |      |      |      |
|---------------------------------------------------------|--------|--------------------------------------------------------------------------------------------------|------|------|------|------|------|------|------|------|
| Section 99                                              |        |                                                                                                  |      |      |      |      |      |      |      |      |
| Hepatitis B virus NC_003977.2<br>SARS-CoV-2 NC_045512.2 | (9213) | 9213                                                                                             | 9220 | 9230 | 9240 | 9250 | 9260 | 9270 | 9280 | 9290 |
|                                                         | (1)    | -----                                                                                            |      |      |      |      |      |      |      |      |
|                                                         | (9213) | ACTGTAGGCACGGCACTTGTGAAAAGATCAGAAGCTGGTGTGTTGTGTATCTACTAGTGGTAGATGGGTACTTAACAATGATTATTACAGATCTTT |      |      |      |      |      |      |      |      |
| Section 100                                             |        |                                                                                                  |      |      |      |      |      |      |      |      |
| Hepatitis B virus NC_003977.2<br>SARS-CoV-2 NC_045512.2 | (9307) | 9307                                                                                             | 9320 | 9330 | 9340 | 9350 | 9360 | 9370 | 9380 | 9390 |
|                                                         | (1)    | -----                                                                                            |      |      |      |      |      |      |      |      |
|                                                         | (9307) | ACCAGGAGTTTTCTGTGGTGTAGATGCTGTAAATTTACTTACTAATATGTTTACACCACTAATTCAACCTATTGGTGCTTTGGACATATCAGCA   |      |      |      |      |      |      |      |      |
| Section 101                                             |        |                                                                                                  |      |      |      |      |      |      |      |      |
| Hepatitis B virus NC_003977.2<br>SARS-CoV-2 NC_045512.2 | (9401) | 9401                                                                                             | 9410 | 9420 | 9430 | 9440 | 9450 | 9460 | 9470 | 9480 |
|                                                         | (1)    | -----                                                                                            |      |      |      |      |      |      |      |      |
|                                                         | (9401) | TCTATAGTAGCTGGTGGTATTGTAGCTATCGTAGTAACATGCCTTGCCTACTATTTTATGAGGTTTAGAAGAGCTTTTGGTGAATACAGTCATG   |      |      |      |      |      |      |      |      |
| Section 102                                             |        |                                                                                                  |      |      |      |      |      |      |      |      |
| Hepatitis B virus NC_003977.2<br>SARS-CoV-2 NC_045512.2 | (9495) | 9495                                                                                             | 9500 | 9510 | 9520 | 9530 | 9540 | 9550 | 9560 | 9570 |
|                                                         | (1)    | -----                                                                                            |      |      |      |      |      |      |      |      |
|                                                         | (9495) | TAGTTGCCTTTAATACTTTACTATTTCCTTATGTCATTCAGTGTACTCTGTTTAAACACCAGTTTACTCATTCTTACCTGGTGTTTATTCTGTTAT |      |      |      |      |      |      |      |      |
| Section 103                                             |        |                                                                                                  |      |      |      |      |      |      |      |      |
| Hepatitis B virus NC_003977.2<br>SARS-CoV-2 NC_045512.2 | (9589) | 9589                                                                                             | 9600 | 9610 | 9620 | 9630 | 9640 | 9650 | 9660 | 9670 |
|                                                         | (1)    | -----                                                                                            |      |      |      |      |      |      |      |      |
|                                                         | (9589) | TTACTTGTAAGTGGATGTTTCTTTTATGAGGTTTAGAAGAGCTTTTGGTGAATACAGTCATG                                   |      |      |      |      |      |      |      |      |
| Section 104                                             |        |                                                                                                  |      |      |      |      |      |      |      |      |
| Hepatitis B virus NC_003977.2<br>SARS-CoV-2 NC_045512.2 | (9683) | 9683                                                                                             | 9690 | 9700 | 9710 | 9720 | 9730 | 9740 | 9750 | 9760 |
|                                                         | (1)    | -----                                                                                            |      |      |      |      |      |      |      |      |
|                                                         | (9683) | ATAACAATTGCTTATATCATTGTATTTCCACAAAGCATTTCTATTGGTTCTTTAGTAATTACCTAAAGAGACGTGTAGTCTTTAATGGTGTTT    |      |      |      |      |      |      |      |      |
| Section 105                                             |        |                                                                                                  |      |      |      |      |      |      |      |      |
| Hepatitis B virus NC_003977.2<br>SARS-CoV-2 NC_045512.2 | (9777) | 9777                                                                                             | 9790 | 9800 | 9810 | 9820 | 9830 | 9840 | 9850 | 9860 |
|                                                         | (1)    | -----                                                                                            |      |      |      |      |      |      |      |      |
|                                                         | (9777) | CCTTTAGTACTTTTGAAGAAGCTGCGCTGTGCACCTTTTGTAAATAAAGAAATGTATCTAAAGTTGCGTAGTGATGTGCTATTACCTCTTAC     |      |      |      |      |      |      |      |      |

SARS-CoV-2 & Hepatitis B.apr

|                                                         |         |                                                                                                   |       |       |       |       |       |       |       |       |             |
|---------------------------------------------------------|---------|---------------------------------------------------------------------------------------------------|-------|-------|-------|-------|-------|-------|-------|-------|-------------|
|                                                         |         |                                                                                                   |       |       |       |       |       |       |       |       | Section 106 |
| Hepatitis B virus NC_003977.2<br>SARS-CoV-2 NC_045512.2 | (9871)  | 9871                                                                                              | 9880  | 9890  | 9900  | 9910  | 9920  | 9930  | 9940  | 9950  | 9964        |
|                                                         | (1)     | -----                                                                                             |       |       |       |       |       |       |       |       |             |
|                                                         | (9871)  | GCAATATAATAGATACTTAGCTCTTTATAATAAGTACAAGTATTTTAGTGGAGCAATGGATACAACCTAGCTACAGAGAAGCTGCTTGTGTGCAT   |       |       |       |       |       |       |       |       |             |
|                                                         |         |                                                                                                   |       |       |       |       |       |       |       |       | Section 107 |
| Hepatitis B virus NC_003977.2<br>SARS-CoV-2 NC_045512.2 | (9965)  | 9965                                                                                              | 9970  | 9980  | 9990  | 10000 | 10010 | 10020 | 10030 | 10040 | 10058       |
|                                                         | (1)     | -----                                                                                             |       |       |       |       |       |       |       |       |             |
|                                                         | (9965)  | CTCGCAAAGGCTCTCAATGACTTCAGTAACTCAGGTTCTGATGTTCTTTACCAACCACCACAAACCTCTATCACCTCAGCTGTTTTGCAGAGTG    |       |       |       |       |       |       |       |       |             |
|                                                         |         |                                                                                                   |       |       |       |       |       |       |       |       | Section 108 |
| Hepatitis B virus NC_003977.2<br>SARS-CoV-2 NC_045512.2 | (10059) | 10059                                                                                             | 10070 | 10080 | 10090 | 10100 | 10110 | 10120 | 10130 | 10140 | 10152       |
|                                                         | (1)     | -----                                                                                             |       |       |       |       |       |       |       |       |             |
|                                                         | (10059) | GTTTTAGAAAAATGGCATTCCCATCTGGTAAAGTTGAGGGTTGTATGGTACAAGTAACTTGTGGTACAACCTACACTTAACGGTCTTTGGCTTGA   |       |       |       |       |       |       |       |       |             |
|                                                         |         |                                                                                                   |       |       |       |       |       |       |       |       | Section 109 |
| Hepatitis B virus NC_003977.2<br>SARS-CoV-2 NC_045512.2 | (10153) | 10153                                                                                             | 10160 | 10170 | 10180 | 10190 | 10200 | 10210 | 10220 | 10230 | 10246       |
|                                                         | (1)     | -----                                                                                             |       |       |       |       |       |       |       |       |             |
|                                                         | (10153) | TGACGTAGTTTACTGTCCAAGACATGTGATCTGCACCTCTGAAGACATGCTTAACCCTAATTATGAAGATTTACTCATTTCGTAAGTCTAATCAT   |       |       |       |       |       |       |       |       |             |
|                                                         |         |                                                                                                   |       |       |       |       |       |       |       |       | Section 110 |
| Hepatitis B virus NC_003977.2<br>SARS-CoV-2 NC_045512.2 | (10247) | 10247                                                                                             | 10260 | 10270 | 10280 | 10290 | 10300 | 10310 | 10320 | 10330 | 10340       |
|                                                         | (1)     | -----                                                                                             |       |       |       |       |       |       |       |       |             |
|                                                         | (10247) | AATTTCTTGGTACAGGCTGGTAATGTTCAACTCAGGGTTATTGGACATTCTATGCAAATTGTGTACTTAAGCTTAAGGTTGATACAGCCAATC     |       |       |       |       |       |       |       |       |             |
|                                                         |         |                                                                                                   |       |       |       |       |       |       |       |       | Section 111 |
| Hepatitis B virus NC_003977.2<br>SARS-CoV-2 NC_045512.2 | (10341) | 10341                                                                                             | 10350 | 10360 | 10370 | 10380 | 10390 | 10400 | 10410 | 10420 | 10434       |
|                                                         | (1)     | -----                                                                                             |       |       |       |       |       |       |       |       |             |
|                                                         | (10341) | CTAAGACACCTAAGTATAAGTTTGTTTCGCATTCAACCAGGACAGACTTTTTTCAGTGTTAGCTTGTTACAATGGTTTCACCATCTGGTGTTTACCA |       |       |       |       |       |       |       |       |             |
|                                                         |         |                                                                                                   |       |       |       |       |       |       |       |       | Section 112 |
| Hepatitis B virus NC_003977.2<br>SARS-CoV-2 NC_045512.2 | (10435) | 10435                                                                                             | 10440 | 10450 | 10460 | 10470 | 10480 | 10490 | 10500 | 10510 | 10528       |
|                                                         | (1)     | -----                                                                                             |       |       |       |       |       |       |       |       |             |
|                                                         | (10435) | ATGTGCTATGAGGCCCAATTTCACTATTAAGGGTTCATTCCTTAATGGTTCATGTGGTAGTGTTGGTTTTAACATAGATTATGACTGTGTCTCT    |       |       |       |       |       |       |       |       |             |



SARS-CoV-2 & Hepatitis B.apr

|                               |         |                                                                                                  |       |       |       |       |       |       |       |       |       |
|-------------------------------|---------|--------------------------------------------------------------------------------------------------|-------|-------|-------|-------|-------|-------|-------|-------|-------|
|                               |         | Section 113                                                                                      |       |       |       |       |       |       |       |       |       |
| Hepatitis B virus NC_003977.2 | (10529) | 10529                                                                                            | 10540 | 10550 | 10560 | 10570 | 10580 | 10590 | 10600 | 10610 | 10622 |
|                               | (1)     | -----                                                                                            |       |       |       |       |       |       |       |       |       |
| SARS-CoV-2 NC_045512.2        | (10529) | TTTTGTTACATGCACCATATGGAATTACCAACTGGAGTTCATGCTGGCACAGACTTAGAAGGTAACCTTTTATGGACCTTTTGTTGACAGGCCAAA |       |       |       |       |       |       |       |       |       |
|                               |         | Section 114                                                                                      |       |       |       |       |       |       |       |       |       |
| Hepatitis B virus NC_003977.2 | (10623) | 10623                                                                                            | 10630 | 10640 | 10650 | 10660 | 10670 | 10680 | 10690 | 10700 | 10716 |
|                               | (1)     | -----                                                                                            |       |       |       |       |       |       |       |       |       |
| SARS-CoV-2 NC_045512.2        | (10623) | CAGCACAAGCAGCTGGTACGGACACAACCTATTACAGTTAATGTTTTAGCTTGGTTGTACGCTGCTGTTATAAATGGAGACAGGTGGTTTCTCAA  |       |       |       |       |       |       |       |       |       |
|                               |         | Section 115                                                                                      |       |       |       |       |       |       |       |       |       |
| Hepatitis B virus NC_003977.2 | (10717) | 10717                                                                                            | 10730 | 10740 | 10750 | 10760 | 10770 | 10780 | 10790 | 10800 | 10810 |
|                               | (1)     | -----                                                                                            |       |       |       |       |       |       |       |       |       |
| SARS-CoV-2 NC_045512.2        | (10717) | TCGATTTACCACAACCTCTTAATGACTTTAACCTTGTGGCTATGAAGTACAATTATGAACCTCTAACACAAGACCATGTTGACATACTAGGACCT  |       |       |       |       |       |       |       |       |       |
|                               |         | Section 116                                                                                      |       |       |       |       |       |       |       |       |       |
| Hepatitis B virus NC_003977.2 | (10811) | 10811                                                                                            | 10820 | 10830 | 10840 | 10850 | 10860 | 10870 | 10880 | 10890 | 10904 |
|                               | (1)     | -----                                                                                            |       |       |       |       |       |       |       |       |       |
| SARS-CoV-2 NC_045512.2        | (10811) | CTTTCTGCTCAAACCTGGAATTGCCGTTTTAGATATGTGTGCTTCATTAAAAGAATTACTGCAAATGGTATGAATGGACGTACCATATTGGGTA   |       |       |       |       |       |       |       |       |       |
|                               |         | Section 117                                                                                      |       |       |       |       |       |       |       |       |       |
| Hepatitis B virus NC_003977.2 | (10905) | 10905                                                                                            | 10910 | 10920 | 10930 | 10940 | 10950 | 10960 | 10970 | 10980 | 10998 |
|                               | (1)     | -----                                                                                            |       |       |       |       |       |       |       |       |       |
| SARS-CoV-2 NC_045512.2        | (10905) | GTGCTTTATTAGAAGATGAATTTACACCTTTTGATGTTGTTAGACAATGCTCAGGTGTTACTTTCCAAAGTGCAGTGAAAAGAACAATCAAGGG   |       |       |       |       |       |       |       |       |       |
|                               |         | Section 118                                                                                      |       |       |       |       |       |       |       |       |       |
| Hepatitis B virus NC_003977.2 | (10999) | 10999                                                                                            | 11010 | 11020 | 11030 | 11040 | 11050 | 11060 | 11070 | 11080 | 11092 |
|                               | (1)     | -----                                                                                            |       |       |       |       |       |       |       |       |       |
| SARS-CoV-2 NC_045512.2        | (10999) | TACACACCACTGGTTGTTACTCACAATTTTGACTTCACTTTTAGTTTTAGTCCAGAGTACTCAATGGTCTTTGTTCTTTTTTTTTGTATGAAAAT  |       |       |       |       |       |       |       |       |       |
|                               |         | Section 119                                                                                      |       |       |       |       |       |       |       |       |       |
| Hepatitis B virus NC_003977.2 | (11093) | 11093                                                                                            | 11100 | 11110 | 11120 | 11130 | 11140 | 11150 | 11160 | 11170 | 11186 |
|                               | (1)     | -----                                                                                            |       |       |       |       |       |       |       |       |       |
| SARS-CoV-2 NC_045512.2        | (11093) | GCCTTTTTTACCTTTTGCTATGGGTATTATTGCTATGTCTGCTTTTGCAATGATGTTTGTCAAACATAAGCATGCATTTCTCTGTTTGTGTTTTGT |       |       |       |       |       |       |       |       |       |

## SARS-CoV-2 &amp; Hepatitis B.apr

|                               |         |                                                                                                 |       |       |       |       |       |       |       |             |
|-------------------------------|---------|-------------------------------------------------------------------------------------------------|-------|-------|-------|-------|-------|-------|-------|-------------|
|                               |         |                                                                                                 |       |       |       |       |       |       |       | Section 120 |
| Hepatitis B virus NC_003977.2 | (11187) | 11187                                                                                           | 11200 | 11210 | 11220 | 11230 | 11240 | 11250 | 11260 | 11270 11280 |
|                               | (1)     | -----                                                                                           |       |       |       |       |       |       |       |             |
| SARS-CoV-2 NC_045512.2        | (11187) | TACCTTCTCTTGCCACTGTAGCTTATTTTAATATGGTCTATATGCCTGCTAGTTGGGTGATGCGTATTATGACATGGTTGGATATGGTTGATAC  |       |       |       |       |       |       |       |             |
|                               |         |                                                                                                 |       |       |       |       |       |       |       | Section 121 |
| Hepatitis B virus NC_003977.2 | (11281) | 11281                                                                                           | 11290 | 11300 | 11310 | 11320 | 11330 | 11340 | 11350 | 11360 11374 |
|                               | (1)     | -----                                                                                           |       |       |       |       |       |       |       |             |
| SARS-CoV-2 NC_045512.2        | (11281) | TAGTTTGCTCTGGTTTTAAGCTAAAAGACTGTGTTATGTATGCATCAGCTGTAGTGTTACTAATCCTTATGACAGCAAGAACTGTGTATGATGAT |       |       |       |       |       |       |       |             |
|                               |         |                                                                                                 |       |       |       |       |       |       |       | Section 122 |
| Hepatitis B virus NC_003977.2 | (11375) | 11375                                                                                           | 11380 | 11390 | 11400 | 11410 | 11420 | 11430 | 11440 | 11450 11468 |
|                               | (1)     | -----                                                                                           |       |       |       |       |       |       |       |             |
| SARS-CoV-2 NC_045512.2        | (11375) | GGTGCTAGGAGAGTGTGGACACTTATGAATGTCTTGACACTCGTTTTATAAAGTTTATTATGGTAATGCTTTAGATCAAGCCATTTCCATGTGGG |       |       |       |       |       |       |       |             |
|                               |         |                                                                                                 |       |       |       |       |       |       |       | Section 123 |
| Hepatitis B virus NC_003977.2 | (11469) | 11469                                                                                           | 11480 | 11490 | 11500 | 11510 | 11520 | 11530 | 11540 | 11550 11562 |
|                               | (1)     | -----                                                                                           |       |       |       |       |       |       |       |             |
| SARS-CoV-2 NC_045512.2        | (11469) | CTCTTATAATCTCTGTTACTTCTAACTACTCAGGTGTAGTTACAACCTGTCATGTTTTTGGCCAGAGGTATTGTTTTTATGTGTGTTGAGTATTG |       |       |       |       |       |       |       |             |
|                               |         |                                                                                                 |       |       |       |       |       |       |       | Section 124 |
| Hepatitis B virus NC_003977.2 | (11563) | 11563                                                                                           | 11570 | 11580 | 11590 | 11600 | 11610 | 11620 | 11630 | 11640 11656 |
|                               | (1)     | -----                                                                                           |       |       |       |       |       |       |       |             |
| SARS-CoV-2 NC_045512.2        | (11563) | CCCTATTTTCTTCATAACTGGTAATACACTTCAGTGATAATGCTAGTTTATTGTTTCTTAGGCTATTTTTGTACTTGTTACTTTGGCCTCTTT   |       |       |       |       |       |       |       |             |
|                               |         |                                                                                                 |       |       |       |       |       |       |       | Section 125 |
| Hepatitis B virus NC_003977.2 | (11657) | 11657                                                                                           | 11670 | 11680 | 11690 | 11700 | 11710 | 11720 | 11730 | 11740 11750 |
|                               | (1)     | -----                                                                                           |       |       |       |       |       |       |       |             |
| SARS-CoV-2 NC_045512.2        | (11657) | TGTTTACTCAACCGCTACTTTAGACTGACTCTTGGTGTTTATGATTACTTAGTTTCTACACAGGAGTTTAGATATATGAATTCACAGGGACTAC  |       |       |       |       |       |       |       |             |
|                               |         |                                                                                                 |       |       |       |       |       |       |       | Section 126 |
| Hepatitis B virus NC_003977.2 | (11751) | 11751                                                                                           | 11760 | 11770 | 11780 | 11790 | 11800 | 11810 | 11820 | 11830 11844 |
|                               | (1)     | -----                                                                                           |       |       |       |       |       |       |       |             |
| SARS-CoV-2 NC_045512.2        | (11751) | TCCCACCCAAGAATAGCATAGATGCCTTCAAACCTCAACATTAAATTGTTGGGTGTTGGTGGCAAACCTTGTATCAAAGTAGCCACTGTACAGTC |       |       |       |       |       |       |       |             |

## SARS-CoV-2 &amp; Hepatitis B.apr

|                               |         |                                                                                                 |       |       |       |       |       |       |       |       |       |       |
|-------------------------------|---------|-------------------------------------------------------------------------------------------------|-------|-------|-------|-------|-------|-------|-------|-------|-------|-------|
|                               |         | Section 127                                                                                     |       |       |       |       |       |       |       |       |       |       |
|                               |         | (11845)                                                                                         | 11845 | 11850 | 11860 | 11870 | 11880 | 11890 | 11900 | 11910 | 11920 | 11938 |
| Hepatitis B virus NC_003977.2 | (1)     | -----                                                                                           |       |       |       |       |       |       |       |       |       |       |
| SARS-CoV-2 NC_045512.2        | (11845) | TAAAATGTCAGATGTAAAGTGCACATCAGTAGTCTTACTCTCAGTTTTGCAACAACTCAGAGTAGAATCATCATCTAAATTGTGGGCTCAATGT  |       |       |       |       |       |       |       |       |       |       |
|                               |         | Section 128                                                                                     |       |       |       |       |       |       |       |       |       |       |
|                               |         | (11939)                                                                                         | 11939 | 11950 | 11960 | 11970 | 11980 | 11990 | 12000 | 12010 | 12020 | 12032 |
| Hepatitis B virus NC_003977.2 | (1)     | -----                                                                                           |       |       |       |       |       |       |       |       |       |       |
| SARS-CoV-2 NC_045512.2        | (11939) | GTCCAGTTACACAATGACATTCTCTTAGCTAAAGATACTACTGAAGCCTTTGAAAAAATGGTTTCACTACTTTCTGTTTTGCTTTCCATGCAGG  |       |       |       |       |       |       |       |       |       |       |
|                               |         | Section 129                                                                                     |       |       |       |       |       |       |       |       |       |       |
|                               |         | (12033)                                                                                         | 12033 | 12040 | 12050 | 12060 | 12070 | 12080 | 12090 | 12100 | 12110 | 12126 |
| Hepatitis B virus NC_003977.2 | (1)     | -----                                                                                           |       |       |       |       |       |       |       |       |       |       |
| SARS-CoV-2 NC_045512.2        | (12033) | GTGCTGTAGACATAAAACAAGCTTTGTGAAGAAATGCTGGACAACAGGGCAACCTTACAAGCTATAGCCTCAGAGTTTAGTTCCCTTCCATCATA |       |       |       |       |       |       |       |       |       |       |
|                               |         | Section 130                                                                                     |       |       |       |       |       |       |       |       |       |       |
|                               |         | (12127)                                                                                         | 12127 | 12140 | 12150 | 12160 | 12170 | 12180 | 12190 | 12200 | 12210 | 12220 |
| Hepatitis B virus NC_003977.2 | (1)     | -----                                                                                           |       |       |       |       |       |       |       |       |       |       |
| SARS-CoV-2 NC_045512.2        | (12127) | TGCAGCTTTTGCTACTGCTCAAGAAGCTTATGAGCAGGCTGTTGCTAATGGTGATTCTGAAGTTGTTCTTAAAAAGTTGAAGAAGTCTTTGAAT  |       |       |       |       |       |       |       |       |       |       |
|                               |         | Section 131                                                                                     |       |       |       |       |       |       |       |       |       |       |
|                               |         | (12221)                                                                                         | 12221 | 12230 | 12240 | 12250 | 12260 | 12270 | 12280 | 12290 | 12300 | 12314 |
| Hepatitis B virus NC_003977.2 | (1)     | -----                                                                                           |       |       |       |       |       |       |       |       |       |       |
| SARS-CoV-2 NC_045512.2        | (12221) | GTGGCTAAATCTGAATTTGACCGTGATGCAGCCATGCAACGTAAGTTGGAAAAGATGGCTGATCAAGCTATGACCCAAATGTATAAACAGGCTA  |       |       |       |       |       |       |       |       |       |       |
|                               |         | Section 132                                                                                     |       |       |       |       |       |       |       |       |       |       |
|                               |         | (12315)                                                                                         | 12315 | 12320 | 12330 | 12340 | 12350 | 12360 | 12370 | 12380 | 12390 | 12408 |
| Hepatitis B virus NC_003977.2 | (1)     | -----                                                                                           |       |       |       |       |       |       |       |       |       |       |
| SARS-CoV-2 NC_045512.2        | (12315) | GATCTGAGGACAAGAGGGCAAAAGTTACTAGTGCTATGCAGACAATGCTTTTCACTATGCTTAGAAAGTTGGATAATGATGCACTCAACAACAT  |       |       |       |       |       |       |       |       |       |       |
|                               |         | Section 133                                                                                     |       |       |       |       |       |       |       |       |       |       |
|                               |         | (12409)                                                                                         | 12409 | 12420 | 12430 | 12440 | 12450 | 12460 | 12470 | 12480 | 12490 | 12502 |
| Hepatitis B virus NC_003977.2 | (1)     | -----                                                                                           |       |       |       |       |       |       |       |       |       |       |
| SARS-CoV-2 NC_045512.2        | (12409) | TATCAACAATGCAAGAGATGGTTGTGTTCCCTTGAACATAATACCTCTTACAACAGCAGCCAAACTAATGGTTGTCATACCAGACTATAACACA  |       |       |       |       |       |       |       |       |       |       |

SARS-CoV-2 & Hepatitis B.apr

|                               |         |                                                                                                  |       |       |       |       |       |       |       |       |             |
|-------------------------------|---------|--------------------------------------------------------------------------------------------------|-------|-------|-------|-------|-------|-------|-------|-------|-------------|
|                               |         |                                                                                                  |       |       |       |       |       |       |       |       | Section 134 |
| Hepatitis B virus NC_003977.2 | (12503) | 12503                                                                                            | 12510 | 12520 | 12530 | 12540 | 12550 | 12560 | 12570 | 12580 | 12596       |
|                               | (1)     | -----                                                                                            |       |       |       |       |       |       |       |       |             |
| SARS-CoV-2 NC_045512.2        | (12503) | TATAAAAATACGTGTGATGGTACAACATTTACTTATGCATCAGCATTGTGGGAAATCCAACAGGTTGTAGATGCAGATAGTAAAATTGTTCAAC   |       |       |       |       |       |       |       |       |             |
|                               |         |                                                                                                  |       |       |       |       |       |       |       |       | Section 135 |
| Hepatitis B virus NC_003977.2 | (12597) | 12597                                                                                            | 12610 | 12620 | 12630 | 12640 | 12650 | 12660 | 12670 | 12680 | 12690       |
|                               | (1)     | -----                                                                                            |       |       |       |       |       |       |       |       |             |
| SARS-CoV-2 NC_045512.2        | (12597) | T TAGTGAAATTAGTATGGACAATTCACCTAATTTAGCATGGCCTCTTATTGTAAACAGCTTTAAGGGCCAATTCTGCTGTCAAATTACAGAATAA |       |       |       |       |       |       |       |       |             |
|                               |         |                                                                                                  |       |       |       |       |       |       |       |       | Section 136 |
| Hepatitis B virus NC_003977.2 | (12691) | 12691                                                                                            | 12700 | 12710 | 12720 | 12730 | 12740 | 12750 | 12760 | 12770 | 12784       |
|                               | (1)     | -----                                                                                            |       |       |       |       |       |       |       |       |             |
| SARS-CoV-2 NC_045512.2        | (12691) | TGAGCTTAGTCCTGTTGCACTACGACAGATGCTTGTGCTGCCGGTACTACACAAACTGCTTGCACTGATGACAATGCGTTAGCTTACTACAAC    |       |       |       |       |       |       |       |       |             |
|                               |         |                                                                                                  |       |       |       |       |       |       |       |       | Section 137 |
| Hepatitis B virus NC_003977.2 | (12785) | 12785                                                                                            | 12790 | 12800 | 12810 | 12820 | 12830 | 12840 | 12850 | 12860 | 12878       |
|                               | (1)     | -----                                                                                            |       |       |       |       |       |       |       |       |             |
| SARS-CoV-2 NC_045512.2        | (12785) | ACAACAAAGGGAGGTAGGTTTGTACTTGCAC TGTTATCCGATTTACAGGATTTGAAATGGGCTAGATTCCCTAAGAGTGATGGAAGTGGTACTA  |       |       |       |       |       |       |       |       |             |
|                               |         |                                                                                                  |       |       |       |       |       |       |       |       | Section 138 |
| Hepatitis B virus NC_003977.2 | (12879) | 12879                                                                                            | 12890 | 12900 | 12910 | 12920 | 12930 | 12940 | 12950 | 12960 | 12972       |
|                               | (1)     | -----                                                                                            |       |       |       |       |       |       |       |       |             |
| SARS-CoV-2 NC_045512.2        | (12879) | TCTATACAGAACTGGAACCACCTTGTAGGTTTGT TACAGACACACCTAAAGGTCCTAAAGTGAAGTATTTATACTTTATTAAAGGATTAAACAA  |       |       |       |       |       |       |       |       |             |
|                               |         |                                                                                                  |       |       |       |       |       |       |       |       | Section 139 |
| Hepatitis B virus NC_003977.2 | (12973) | 12973                                                                                            | 12980 | 12990 | 13000 | 13010 | 13020 | 13030 | 13040 | 13050 | 13066       |
|                               | (1)     | -----                                                                                            |       |       |       |       |       |       |       |       |             |
| SARS-CoV-2 NC_045512.2        | (12973) | CCTAAATAGAGGTATGGTACTTGGTAGTTTAGCTGCCACAGTACGCTCTACAAGCTGGTAATGCAACAGAAGTGCCTGCCAATTCAACTGTATTA  |       |       |       |       |       |       |       |       |             |
|                               |         |                                                                                                  |       |       |       |       |       |       |       |       | Section 140 |
| Hepatitis B virus NC_003977.2 | (13067) | 13067                                                                                            | 13080 | 13090 | 13100 | 13110 | 13120 | 13130 | 13140 | 13150 | 13160       |
|                               | (1)     | -----                                                                                            |       |       |       |       |       |       |       |       |             |
| SARS-CoV-2 NC_045512.2        | (13067) | TCTTTCTGTGCTTTTGGCTGTAGATGCTGCTAAAGCTTACAAAGATTATCTAGCTAGTGGGGGACAACCAATCACTAATTGTGTTAAGATGTTGT  |       |       |       |       |       |       |       |       |             |

SARS-CoV-2 & Hepatitis B.apr

|                               |         |                                                                                                |       |       |       |       |       |       |       |       |             |
|-------------------------------|---------|------------------------------------------------------------------------------------------------|-------|-------|-------|-------|-------|-------|-------|-------|-------------|
|                               |         |                                                                                                |       |       |       |       |       |       |       |       | Section 141 |
| Hepatitis B virus NC_003977.2 | (13161) | 13161                                                                                          | 13170 | 13180 | 13190 | 13200 | 13210 | 13220 | 13230 | 13240 | 13254       |
|                               | (1)     | -----                                                                                          |       |       |       |       |       |       |       |       |             |
| SARS-CoV-2 NC_045512.2        | (13161) | GTACACACACTGGTACTGGTCAGGCAATAACAGTTACACCGGAAGCCAATATGGATCAAGAATCCTTTGGTGGTGCATCGTGTGTCTGTACTG  |       |       |       |       |       |       |       |       |             |
|                               |         |                                                                                                |       |       |       |       |       |       |       |       | Section 142 |
| Hepatitis B virus NC_003977.2 | (13255) | 13255                                                                                          | 13260 | 13270 | 13280 | 13290 | 13300 | 13310 | 13320 | 13330 | 13348       |
|                               | (1)     | -----                                                                                          |       |       |       |       |       |       |       |       |             |
| SARS-CoV-2 NC_045512.2        | (13255) | CCGTTGCCACATAGATCATCCAAATCCTAAAGGATTTTGTGACTTAAAAGGTAAGTATGTACAAATACCTACAACCTGTGCTAATGACCCTGTG |       |       |       |       |       |       |       |       |             |
|                               |         |                                                                                                |       |       |       |       |       |       |       |       | Section 143 |
| Hepatitis B virus NC_003977.2 | (13349) | 13349                                                                                          | 13360 | 13370 | 13380 | 13390 | 13400 | 13410 | 13420 | 13430 | 13442       |
|                               | (1)     | -----                                                                                          |       |       |       |       |       |       |       |       |             |
| SARS-CoV-2 NC_045512.2        | (13349) | GGTTTTACACTTAAAAACACAGTCTGTACCGTCTGCGGTATGTGGAAAGGTTATGGCTGTAGTTGTGATCAACTCCGCGAACCCATGCTTCAGT |       |       |       |       |       |       |       |       |             |
|                               |         |                                                                                                |       |       |       |       |       |       |       |       | Section 144 |
| Hepatitis B virus NC_003977.2 | (13443) | 13443                                                                                          | 13450 | 13460 | 13470 | 13480 | 13490 | 13500 | 13510 | 13520 | 13536       |
|                               | (1)     | -----                                                                                          |       |       |       |       |       |       |       |       |             |
| SARS-CoV-2 NC_045512.2        | (13443) | CAGCTGATGCACAATCGTTTTTAAACGGGTTTGCGGTGTAAGTGCAGCCCGTCTTACACCGTGCGGCACAGGCACTAGTACTGATGTCGTATAC |       |       |       |       |       |       |       |       |             |
|                               |         |                                                                                                |       |       |       |       |       |       |       |       | Section 145 |
| Hepatitis B virus NC_003977.2 | (13537) | 13537                                                                                          | 13550 | 13560 | 13570 | 13580 | 13590 | 13600 | 13610 | 13620 | 13630       |
|                               | (1)     | -----                                                                                          |       |       |       |       |       |       |       |       |             |
| SARS-CoV-2 NC_045512.2        | (13537) | AGGGCTTTTGACATCTACAATGATAAAGTAGCTGGTTTTGCTAAATTCTTAAAACTAATTGTTGTCGCTTCCAAGAAAAGGACGAAGATGACA  |       |       |       |       |       |       |       |       |             |
|                               |         |                                                                                                |       |       |       |       |       |       |       |       | Section 146 |
| Hepatitis B virus NC_003977.2 | (13631) | 13631                                                                                          | 13640 | 13650 | 13660 | 13670 | 13680 | 13690 | 13700 | 13710 | 13724       |
|                               | (1)     | -----                                                                                          |       |       |       |       |       |       |       |       |             |
| SARS-CoV-2 NC_045512.2        | (13631) | ATTTAATTGATTCTTACTTTGTAGTTAAGAGACACACTTTCTCTAACTACCAACATGAAGAAACAATTTATAATTTACTTAAGGATTGTCCAGC |       |       |       |       |       |       |       |       |             |
|                               |         |                                                                                                |       |       |       |       |       |       |       |       | Section 147 |
| Hepatitis B virus NC_003977.2 | (13725) | 13725                                                                                          | 13730 | 13740 | 13750 | 13760 | 13770 | 13780 | 13790 | 13800 | 13818       |
|                               | (1)     | -----                                                                                          |       |       |       |       |       |       |       |       |             |
| SARS-CoV-2 NC_045512.2        | (13725) | TGTTGCTAAACATGACTTCTTTAAGTTTAGAATAGACGGTGACATGGTACCACATATATCACGTCAACGTCTTACTAAATACACAATGGCAGAC |       |       |       |       |       |       |       |       |             |

## SARS-CoV-2 &amp; Hepatitis B.apr

|                               |         |                                                                                                  |       |       |       |       |       |       |       |       |             |
|-------------------------------|---------|--------------------------------------------------------------------------------------------------|-------|-------|-------|-------|-------|-------|-------|-------|-------------|
|                               |         |                                                                                                  |       |       |       |       |       |       |       |       | Section 148 |
| Hepatitis B virus NC_003977.2 | (13819) | 13819                                                                                            | 13830 | 13840 | 13850 | 13860 | 13870 | 13880 | 13890 | 13900 | 13912       |
|                               | (1)     | -----                                                                                            |       |       |       |       |       |       |       |       |             |
| SARS-CoV-2 NC_045512.2        | (13819) | CTCGTCTATGCTTTAAGGCATTTTGATGAAGGTAATTGTGACACATTAAAAGAAATACTTGTCACATACAATTGTTGTGATGATGATTATTTCA   |       |       |       |       |       |       |       |       |             |
|                               |         |                                                                                                  |       |       |       |       |       |       |       |       | Section 149 |
| Hepatitis B virus NC_003977.2 | (13913) | 13913                                                                                            | 13920 | 13930 | 13940 | 13950 | 13960 | 13970 | 13980 | 13990 | 14006       |
|                               | (1)     | -----                                                                                            |       |       |       |       |       |       |       |       |             |
| SARS-CoV-2 NC_045512.2        | (13913) | ATAAAAAGGACTGGTATGATTTTGTAGAAAACCCAGATATATTACGCGTATACGCCAACTTAGGTGAACGTGTACGCCAAGCTTTGTTAAAAAC   |       |       |       |       |       |       |       |       |             |
|                               |         |                                                                                                  |       |       |       |       |       |       |       |       | Section 150 |
| Hepatitis B virus NC_003977.2 | (14007) | 14007                                                                                            | 14020 | 14030 | 14040 | 14050 | 14060 | 14070 | 14080 | 14090 | 14100       |
|                               | (1)     | -----                                                                                            |       |       |       |       |       |       |       |       |             |
| SARS-CoV-2 NC_045512.2        | (14007) | AGTACAATTCTGTGATGCCATGCGAAATGCTGGTATTGTTGGTGTACTGACATTAGATAATCAAGATCTCAATGGTAACTGGTATGATTTTCGGT  |       |       |       |       |       |       |       |       |             |
|                               |         |                                                                                                  |       |       |       |       |       |       |       |       | Section 151 |
| Hepatitis B virus NC_003977.2 | (14101) | 14101                                                                                            | 14110 | 14120 | 14130 | 14140 | 14150 | 14160 | 14170 | 14180 | 14194       |
|                               | (1)     | -----                                                                                            |       |       |       |       |       |       |       |       |             |
| SARS-CoV-2 NC_045512.2        | (14101) | GATTTTCATACAAACCACGCCAGGTAGTGGAGTTTCCTGTTGTAGATTCTTATTATTCATTGTTAATGCCTATATTAACCTTGACCAGGGCTTTAA |       |       |       |       |       |       |       |       |             |
|                               |         |                                                                                                  |       |       |       |       |       |       |       |       | Section 152 |
| Hepatitis B virus NC_003977.2 | (14195) | 14195                                                                                            | 14200 | 14210 | 14220 | 14230 | 14240 | 14250 | 14260 | 14270 | 14288       |
|                               | (1)     | -----                                                                                            |       |       |       |       |       |       |       |       |             |
| SARS-CoV-2 NC_045512.2        | (14195) | CTGCAGAGTCACATGTTGACACTGACTTAACAAAGCCTTACATTAAGTGGGATTTGTTAAAATATGACTTCACGGAAGAGAGGTTAAAACCTCTT  |       |       |       |       |       |       |       |       |             |
|                               |         |                                                                                                  |       |       |       |       |       |       |       |       | Section 153 |
| Hepatitis B virus NC_003977.2 | (14289) | 14289                                                                                            | 14300 | 14310 | 14320 | 14330 | 14340 | 14350 | 14360 | 14370 | 14382       |
|                               | (1)     | -----                                                                                            |       |       |       |       |       |       |       |       |             |
| SARS-CoV-2 NC_045512.2        | (14289) | TGACCGTTATTTTAAATATTGGGATCAGACATACCACCCAAATTGTGTTAACTGTTTGGATGACAGATGCATTCTGCATTGTGCAAACCTTTAAT  |       |       |       |       |       |       |       |       |             |
|                               |         |                                                                                                  |       |       |       |       |       |       |       |       | Section 154 |
| Hepatitis B virus NC_003977.2 | (14383) | 14383                                                                                            | 14390 | 14400 | 14410 | 14420 | 14430 | 14440 | 14450 | 14460 | 14476       |
|                               | (1)     | -----                                                                                            |       |       |       |       |       |       |       |       |             |
| SARS-CoV-2 NC_045512.2        | (14383) | GTTTTATTCTCTACAGTGTTCCACCTACAAGTTTTGGACCACTAGTGAGAAAAATATTTGTTGATGGTGTTCCATTTGTAGTTTCAACTGGAT    |       |       |       |       |       |       |       |       |             |

SARS-CoV-2 & Hepatitis B.apr

|                               |         |                                                                                                  |       |       |       |       |       |       |       |       |       |
|-------------------------------|---------|--------------------------------------------------------------------------------------------------|-------|-------|-------|-------|-------|-------|-------|-------|-------|
|                               |         | Section 155                                                                                      |       |       |       |       |       |       |       |       |       |
| Hepatitis B virus NC_003977.2 | (14477) | 14477                                                                                            | 14490 | 14500 | 14510 | 14520 | 14530 | 14540 | 14550 | 14560 | 14570 |
|                               | (1)     | -----                                                                                            |       |       |       |       |       |       |       |       |       |
| SARS-CoV-2 NC_045512.2        | (14477) | ACCACTTCAGAGAGCTAGGTGTTGTACATAATCAGGATGTAACTTACATAGCTCTAGACTTAGTTTTAAGGAATTACTTGTGTATGCTGCTGA    |       |       |       |       |       |       |       |       |       |
|                               |         | Section 156                                                                                      |       |       |       |       |       |       |       |       |       |
| Hepatitis B virus NC_003977.2 | (14571) | 14571                                                                                            | 14580 | 14590 | 14600 | 14610 | 14620 | 14630 | 14640 | 14650 | 14664 |
|                               | (1)     | -----                                                                                            |       |       |       |       |       |       |       |       |       |
| SARS-CoV-2 NC_045512.2        | (14571) | CCCTGCTATGCACGCTGCTTCTGGTAATCTATTACTAGATAAACGCACTACGTGCTTTTCAGTAGCTGCACTTACTAACAATGTTGCTTTTCAA   |       |       |       |       |       |       |       |       |       |
|                               |         | Section 157                                                                                      |       |       |       |       |       |       |       |       |       |
| Hepatitis B virus NC_003977.2 | (14665) | 14665                                                                                            | 14670 | 14680 | 14690 | 14700 | 14710 | 14720 | 14730 | 14740 | 14758 |
|                               | (1)     | -----                                                                                            |       |       |       |       |       |       |       |       |       |
| SARS-CoV-2 NC_045512.2        | (14665) | ACTGTCAAACCCGGTAATTTTAACAAAGACTTCTATGACTTTGCTGTGTCTAAGGGTTTCTTTAAGGAAGGAAGTTCTGTTGAATTAACACT     |       |       |       |       |       |       |       |       |       |
|                               |         | Section 158                                                                                      |       |       |       |       |       |       |       |       |       |
| Hepatitis B virus NC_003977.2 | (14759) | 14759                                                                                            | 14770 | 14780 | 14790 | 14800 | 14810 | 14820 | 14830 | 14840 | 14852 |
|                               | (1)     | -----                                                                                            |       |       |       |       |       |       |       |       |       |
| SARS-CoV-2 NC_045512.2        | (14759) | TCTTCTTTGCTCAGGATGGTAATGCTGCTATCAGCGATTATGACTACTATCGTTATAATCTACCAACAATGTGTGATATCAGACAACACTACTATT |       |       |       |       |       |       |       |       |       |
|                               |         | Section 159                                                                                      |       |       |       |       |       |       |       |       |       |
| Hepatitis B virus NC_003977.2 | (14853) | 14853                                                                                            | 14860 | 14870 | 14880 | 14890 | 14900 | 14910 | 14920 | 14930 | 14946 |
|                               | (1)     | -----                                                                                            |       |       |       |       |       |       |       |       |       |
| SARS-CoV-2 NC_045512.2        | (14853) | TG TAGTTGAAGTTGTTGATAAGTACTTTGATTGTTACGATGGTGGCTGTATTAATGCTAACCAAGTCATCGTCAACAACCTAGACAAATCAGCT  |       |       |       |       |       |       |       |       |       |
|                               |         | Section 160                                                                                      |       |       |       |       |       |       |       |       |       |
| Hepatitis B virus NC_003977.2 | (14947) | 14947                                                                                            | 14960 | 14970 | 14980 | 14990 | 15000 | 15010 | 15020 | 15030 | 15040 |
|                               | (1)     | -----                                                                                            |       |       |       |       |       |       |       |       |       |
| SARS-CoV-2 NC_045512.2        | (14947) | GGTTTTCCATTTAATAAATGGGGTAAGGCTAGACTTTATTATGATTCAATGAGTTATGAGGATCAAGATGCACTTTTCGCATATACAAAACGTA   |       |       |       |       |       |       |       |       |       |
|                               |         | Section 161                                                                                      |       |       |       |       |       |       |       |       |       |
| Hepatitis B virus NC_003977.2 | (15041) | 15041                                                                                            | 15050 | 15060 | 15070 | 15080 | 15090 | 15100 | 15110 | 15120 | 15134 |
|                               | (1)     | -----                                                                                            |       |       |       |       |       |       |       |       |       |
| SARS-CoV-2 NC_045512.2        | (15041) | ATGTCATCCCTACTATAACTCAAATGAATCTTAAGTATGCCATTAGTGCAAAGAATAGAGCTCGCACCGTAGCTGGTGTCTCTATCTGTAGTAC   |       |       |       |       |       |       |       |       |       |

SARS-CoV-2 & Hepatitis B.apr

|                                |         |                                                                                                  |       |       |       |       |       |       |       |       |       |
|--------------------------------|---------|--------------------------------------------------------------------------------------------------|-------|-------|-------|-------|-------|-------|-------|-------|-------|
|                                |         | Section 162                                                                                      |       |       |       |       |       |       |       |       |       |
| Hepatitis B virus NC_003977.2  | (15135) | 15135                                                                                            | 15140 | 15150 | 15160 | 15170 | 15180 | 15190 | 15200 | 15210 | 15228 |
|                                | (1)     | -----                                                                                            |       |       |       |       |       |       |       |       |       |
| SARS-CoV-2 NC_045512.2 (15135) |         | TATGACCAATAGACAGTTTCATCAAAAATTATTGAAATCAATAGCCGCCACTAGAGGAGCTACTGTAGTAATTGGAACAAGCAAATTCTATGGT   |       |       |       |       |       |       |       |       |       |
|                                |         | Section 163                                                                                      |       |       |       |       |       |       |       |       |       |
| Hepatitis B virus NC_003977.2  | (15229) | 15229                                                                                            | 15240 | 15250 | 15260 | 15270 | 15280 | 15290 | 15300 | 15310 | 15322 |
|                                | (1)     | -----                                                                                            |       |       |       |       |       |       |       |       |       |
| SARS-CoV-2 NC_045512.2 (15229) |         | GGTTGGCACAAACATGTTAAAAACTGTTTATAGTGATGTAGAAAACCTCACCTTATGGGTTGGGATTATCCTAAATGTGATAGAGCCATGCCTA   |       |       |       |       |       |       |       |       |       |
|                                |         | Section 164                                                                                      |       |       |       |       |       |       |       |       |       |
| Hepatitis B virus NC_003977.2  | (15323) | 15323                                                                                            | 15330 | 15340 | 15350 | 15360 | 15370 | 15380 | 15390 | 15400 | 15416 |
|                                | (1)     | -----                                                                                            |       |       |       |       |       |       |       |       |       |
| SARS-CoV-2 NC_045512.2 (15323) |         | ACATGCTTAGAATTATGGCCTCACTTGTTCTTGCTCGCAAACATACAACGTGTTGTAGCTTGTCACACCGTTTCTATAGATTAGCTAATGAGTG   |       |       |       |       |       |       |       |       |       |
|                                |         | Section 165                                                                                      |       |       |       |       |       |       |       |       |       |
| Hepatitis B virus NC_003977.2  | (15417) | 15417                                                                                            | 15430 | 15440 | 15450 | 15460 | 15470 | 15480 | 15490 | 15500 | 15510 |
|                                | (1)     | -----                                                                                            |       |       |       |       |       |       |       |       |       |
| SARS-CoV-2 NC_045512.2 (15417) |         | TGCTCAAGTATTGAGTGAAATGGTCATGTGTGGCGGTTCACTATATGTTAAACCAGGTGGAACCTCATCAGGAGATGCCACAACCTGCTTATGCT  |       |       |       |       |       |       |       |       |       |
|                                |         | Section 166                                                                                      |       |       |       |       |       |       |       |       |       |
| Hepatitis B virus NC_003977.2  | (15511) | 15511                                                                                            | 15520 | 15530 | 15540 | 15550 | 15560 | 15570 | 15580 | 15590 | 15604 |
|                                | (1)     | -----                                                                                            |       |       |       |       |       |       |       |       |       |
| SARS-CoV-2 NC_045512.2 (15511) |         | AATAGTGTTTTTAACATTTGTCAAGCTGTACACGGCCAATGTTAATGCACTTTTATCTACTGATGGTAACAAAATTGCCGATAAGTATGTCCGCA  |       |       |       |       |       |       |       |       |       |
|                                |         | Section 167                                                                                      |       |       |       |       |       |       |       |       |       |
| Hepatitis B virus NC_003977.2  | (15605) | 15605                                                                                            | 15610 | 15620 | 15630 | 15640 | 15650 | 15660 | 15670 | 15680 | 15698 |
|                                | (1)     | -----                                                                                            |       |       |       |       |       |       |       |       |       |
| SARS-CoV-2 NC_045512.2 (15605) |         | ATTTACAACACAGACTTTTATGAGTGCTCTCTATAGAAATAGAGATGTTGACACAGACTTTGTGAATGAGTTTTACGCATATTTGCGTAAACATTT |       |       |       |       |       |       |       |       |       |
|                                |         | Section 168                                                                                      |       |       |       |       |       |       |       |       |       |
| Hepatitis B virus NC_003977.2  | (15699) | 15699                                                                                            | 15710 | 15720 | 15730 | 15740 | 15750 | 15760 | 15770 | 15780 | 15792 |
|                                | (1)     | -----                                                                                            |       |       |       |       |       |       |       |       |       |
| SARS-CoV-2 NC_045512.2 (15699) |         | CTCAATGATGATACTCTCTGACGATGCTGTTGTGTGTTTCAATAGCACTTATGCATCTCAAGGTCTAGTGGCTAGCATAAAGAAGCTTTAAGTCA  |       |       |       |       |       |       |       |       |       |



## SARS-CoV-2 &amp; Hepatitis B.apr

|                               |         |                                                                                                 |       |       |       |       |       |       |       |       |       |
|-------------------------------|---------|-------------------------------------------------------------------------------------------------|-------|-------|-------|-------|-------|-------|-------|-------|-------|
| Section 169                   |         |                                                                                                 |       |       |       |       |       |       |       |       |       |
| (15793)                       |         | 15793                                                                                           | 15800 | 15810 | 15820 | 15830 | 15840 | 15850 | 15860 | 15870 | 15886 |
| Hepatitis B virus NC_003977.2 | (1)     | -----                                                                                           |       |       |       |       |       |       |       |       |       |
| SARS-CoV-2 NC_045512.2        | (15793) | GTTCTTTATTATCAAAACAATGTTTTATGTCTGAAGCAAAATGTTGGACTGAGACTGACCTTACTAAAGGACCTCATGAATTTTGCTCTCAAC   |       |       |       |       |       |       |       |       |       |
| Section 170                   |         |                                                                                                 |       |       |       |       |       |       |       |       |       |
| (15887)                       |         | 15887                                                                                           | 15900 | 15910 | 15920 | 15930 | 15940 | 15950 | 15960 | 15970 | 15980 |
| Hepatitis B virus NC_003977.2 | (1)     | -----                                                                                           |       |       |       |       |       |       |       |       |       |
| SARS-CoV-2 NC_045512.2        | (15887) | ATACAATGCTAGTTAAACAGGGTGATGATTATGTGTACCTTCCTTACCCAGATCCATCAAGAATCCTAGGGGCCGGCTGTTTTGTAGATGATAT  |       |       |       |       |       |       |       |       |       |
| Section 171                   |         |                                                                                                 |       |       |       |       |       |       |       |       |       |
| (15981)                       |         | 15981                                                                                           | 15990 | 16000 | 16010 | 16020 | 16030 | 16040 | 16050 | 16060 | 16074 |
| Hepatitis B virus NC_003977.2 | (1)     | -----                                                                                           |       |       |       |       |       |       |       |       |       |
| SARS-CoV-2 NC_045512.2        | (15981) | CGTAAAAACAGATGGTACACTTATGATTGAACGGTTCGTGTCTTTAGCTATAGATGCTTACCCACTTACTAAACATCCTAATCAGGAGTATGCT  |       |       |       |       |       |       |       |       |       |
| Section 172                   |         |                                                                                                 |       |       |       |       |       |       |       |       |       |
| (16075)                       |         | 16075                                                                                           | 16080 | 16090 | 16100 | 16110 | 16120 | 16130 | 16140 | 16150 | 16168 |
| Hepatitis B virus NC_003977.2 | (1)     | -----                                                                                           |       |       |       |       |       |       |       |       |       |
| SARS-CoV-2 NC_045512.2        | (16075) | GATGTCTTTCATTTGTACTTACAATACATAAGAAAGCTACATGATGAGTTAACAGGACACATGTTAGACATGTATTCTGTTATGCTTACTAATG  |       |       |       |       |       |       |       |       |       |
| Section 173                   |         |                                                                                                 |       |       |       |       |       |       |       |       |       |
| (16169)                       |         | 16169                                                                                           | 16180 | 16190 | 16200 | 16210 | 16220 | 16230 | 16240 | 16250 | 16262 |
| Hepatitis B virus NC_003977.2 | (1)     | -----                                                                                           |       |       |       |       |       |       |       |       |       |
| SARS-CoV-2 NC_045512.2        | (16169) | ATAACACTTCAAGGTATTGGGAACCTGAGTTTTATGAGGCTATGTACACACCGCATAACAGTCTTACAGGCTGTTGGGGCTTGTGTTCTTTGCAA |       |       |       |       |       |       |       |       |       |
| Section 174                   |         |                                                                                                 |       |       |       |       |       |       |       |       |       |
| (16263)                       |         | 16263                                                                                           | 16270 | 16280 | 16290 | 16300 | 16310 | 16320 | 16330 | 16340 | 16356 |
| Hepatitis B virus NC_003977.2 | (1)     | -----                                                                                           |       |       |       |       |       |       |       |       |       |
| SARS-CoV-2 NC_045512.2        | (16263) | TTCACAGACTTCATTAAGATGTGGTGCTTGCATACGTAGACCATTCTTATGTTGTAAATGCTGTTACGACCATGTCATATCAACATCACATAAA  |       |       |       |       |       |       |       |       |       |
| Section 175                   |         |                                                                                                 |       |       |       |       |       |       |       |       |       |
| (16357)                       |         | 16357                                                                                           | 16370 | 16380 | 16390 | 16400 | 16410 | 16420 | 16430 | 16440 | 16450 |
| Hepatitis B virus NC_003977.2 | (1)     | -----                                                                                           |       |       |       |       |       |       |       |       |       |
| SARS-CoV-2 NC_045512.2        | (16357) | TTAGTCTTGCTCTGTTAATCCGTATGTTTGCAATGCTCCAGGTTGTGATGTCACAGATGTGACTCAACTTTACTTAGGAGGTATGAGCTATTATT |       |       |       |       |       |       |       |       |       |

## SARS-CoV-2 &amp; Hepatitis B.apr

|                                                         |         |                                                                                                  |       |       |       |       |       |       |       |       |             |
|---------------------------------------------------------|---------|--------------------------------------------------------------------------------------------------|-------|-------|-------|-------|-------|-------|-------|-------|-------------|
|                                                         |         |                                                                                                  |       |       |       |       |       |       |       |       | Section 176 |
| Hepatitis B virus NC_003977.2<br>SARS-CoV-2 NC_045512.2 | (16451) | 16451                                                                                            | 16460 | 16470 | 16480 | 16490 | 16500 | 16510 | 16520 | 16530 | 16544       |
|                                                         | (1)     | -----                                                                                            |       |       |       |       |       |       |       |       |             |
|                                                         | (16451) | GTAAATCACATAAAACCACCCATTAGTTTTCCATTGTGTGCTAATGGACAAGTTTTTGGTTTATATAAAAAATACATGTGTTGGTAGCGATAATGT |       |       |       |       |       |       |       |       |             |
|                                                         |         |                                                                                                  |       |       |       |       |       |       |       |       | Section 177 |
| Hepatitis B virus NC_003977.2<br>SARS-CoV-2 NC_045512.2 | (16545) | 16545                                                                                            | 16550 | 16560 | 16570 | 16580 | 16590 | 16600 | 16610 | 16620 | 16638       |
|                                                         | (1)     | -----                                                                                            |       |       |       |       |       |       |       |       |             |
|                                                         | (16545) | TACTGACTTTAATGCAATTGCAACATGTGACTGGACAAATGCTGGTGATTACATTTTAGCTAACACCTGTACTGAAAGACTCAAGCTTTTTTGCA  |       |       |       |       |       |       |       |       |             |
|                                                         |         |                                                                                                  |       |       |       |       |       |       |       |       | Section 178 |
| Hepatitis B virus NC_003977.2<br>SARS-CoV-2 NC_045512.2 | (16639) | 16639                                                                                            | 16650 | 16660 | 16670 | 16680 | 16690 | 16700 | 16710 | 16720 | 16732       |
|                                                         | (1)     | -----                                                                                            |       |       |       |       |       |       |       |       |             |
|                                                         | (16639) | GCAGAAACGCTCAAAGCTACTGAGGAGACATTTAAACTGTCTTATGGTATTGCTACTGTACGTGAAGTGCTGTCTGACAGAGAATTACATCTTT   |       |       |       |       |       |       |       |       |             |
|                                                         |         |                                                                                                  |       |       |       |       |       |       |       |       | Section 179 |
| Hepatitis B virus NC_003977.2<br>SARS-CoV-2 NC_045512.2 | (16733) | 16733                                                                                            | 16740 | 16750 | 16760 | 16770 | 16780 | 16790 | 16800 | 16810 | 16826       |
|                                                         | (1)     | -----                                                                                            |       |       |       |       |       |       |       |       |             |
|                                                         | (16733) | CATGGGAAGTTGGTAAACCTAGACCACCACTTAACCGAAATTATGTCTTTACTGGTTATCGTGTAACATAAAACAGTAAAGTACAAATAGGAGA   |       |       |       |       |       |       |       |       |             |
|                                                         |         |                                                                                                  |       |       |       |       |       |       |       |       | Section 180 |
| Hepatitis B virus NC_003977.2<br>SARS-CoV-2 NC_045512.2 | (16827) | 16827                                                                                            | 16840 | 16850 | 16860 | 16870 | 16880 | 16890 | 16900 | 16910 | 16920       |
|                                                         | (1)     | -----                                                                                            |       |       |       |       |       |       |       |       |             |
|                                                         | (16827) | GTACACCTTTGAAAAAGGTGACTATGGTGATGCTGTTGTTTACCGAGGTACAACAACCTACAAATTAAATGTTGGTGATTATTTTGTGCTGACA   |       |       |       |       |       |       |       |       |             |
|                                                         |         |                                                                                                  |       |       |       |       |       |       |       |       | Section 181 |
| Hepatitis B virus NC_003977.2<br>SARS-CoV-2 NC_045512.2 | (16921) | 16921                                                                                            | 16930 | 16940 | 16950 | 16960 | 16970 | 16980 | 16990 | 17000 | 17014       |
|                                                         | (1)     | -----                                                                                            |       |       |       |       |       |       |       |       |             |
|                                                         | (16921) | TCACATACAGTAATGCCATTAAAGTGCACCTACACTAGTGCCACAAGAGCACTATGTTAGAATTACTGGCTTATACCCAACACTCAATATCTCAG  |       |       |       |       |       |       |       |       |             |
|                                                         |         |                                                                                                  |       |       |       |       |       |       |       |       | Section 182 |
| Hepatitis B virus NC_003977.2<br>SARS-CoV-2 NC_045512.2 | (17015) | 17015                                                                                            | 17020 | 17030 | 17040 | 17050 | 17060 | 17070 | 17080 | 17090 | 17108       |
|                                                         | (1)     | -----                                                                                            |       |       |       |       |       |       |       |       |             |
|                                                         | (17015) | ATGAGTTTTCTAGCAATGTTGCAAATTATCAAAAGGTTGGTATGCAAAAGTATTCTACACTCCAGGGACCACCTGGTACTGGTAAGAGTCATTT   |       |       |       |       |       |       |       |       |             |

## SARS-CoV-2 &amp; Hepatitis B.apr

|                               |         |                                                                                                   |       |       |       |       |       |       |       |       |             |
|-------------------------------|---------|---------------------------------------------------------------------------------------------------|-------|-------|-------|-------|-------|-------|-------|-------|-------------|
|                               |         |                                                                                                   |       |       |       |       |       |       |       |       | Section 183 |
| Hepatitis B virus NC_003977.2 | (17109) | 17109                                                                                             | 17120 | 17130 | 17140 | 17150 | 17160 | 17170 | 17180 | 17190 | 17202       |
|                               | (1)     | -----                                                                                             |       |       |       |       |       |       |       |       |             |
| SARS-CoV-2 NC_045512.2        | (17109) | TGCTATTGGCCTAGCTCTCTACTACCCTTCTGCTCGCATAGTGTATACAGCTTGCTCTCATGCCGCTGTTGATGCACTATGTGAGAAGGCATTA    |       |       |       |       |       |       |       |       |             |
|                               |         |                                                                                                   |       |       |       |       |       |       |       |       | Section 184 |
| Hepatitis B virus NC_003977.2 | (17203) | 17203                                                                                             | 17210 | 17220 | 17230 | 17240 | 17250 | 17260 | 17270 | 17280 | 17296       |
|                               | (1)     | -----                                                                                             |       |       |       |       |       |       |       |       |             |
| SARS-CoV-2 NC_045512.2        | (17203) | AAATATTTGCCCTATAGATAAAATGTAGTAGAATTATACCTGCACGTGCTCGTGTAGAGTGTTTTGATAAAATTCAAAGTGAATTCAACATTAGAAC |       |       |       |       |       |       |       |       |             |
|                               |         |                                                                                                   |       |       |       |       |       |       |       |       | Section 185 |
| Hepatitis B virus NC_003977.2 | (17297) | 17297                                                                                             | 17310 | 17320 | 17330 | 17340 | 17350 | 17360 | 17370 | 17380 | 17390       |
|                               | (1)     | -----                                                                                             |       |       |       |       |       |       |       |       |             |
| SARS-CoV-2 NC_045512.2        | (17297) | AGTATGTCTTTTGTACTGTAAATGCATTGCCTGAGACGACAGCAGATATAGTTGTCTTTGATGAAATTTCAATGGCCACAAATTATGATTTGAG    |       |       |       |       |       |       |       |       |             |
|                               |         |                                                                                                   |       |       |       |       |       |       |       |       | Section 186 |
| Hepatitis B virus NC_003977.2 | (17391) | 17391                                                                                             | 17400 | 17410 | 17420 | 17430 | 17440 | 17450 | 17460 | 17470 | 17484       |
|                               | (1)     | -----                                                                                             |       |       |       |       |       |       |       |       |             |
| SARS-CoV-2 NC_045512.2        | (17391) | TGTTGTCAATGCCAGATTACGTGCTAAGCACTATGTGTACATTGGCGACCCTGCTCAATTACCTGCACCACGCACATTGCTAACTAAGGGGCACA   |       |       |       |       |       |       |       |       |             |
|                               |         |                                                                                                   |       |       |       |       |       |       |       |       | Section 187 |
| Hepatitis B virus NC_003977.2 | (17485) | 17485                                                                                             | 17490 | 17500 | 17510 | 17520 | 17530 | 17540 | 17550 | 17560 | 17578       |
|                               | (1)     | -----                                                                                             |       |       |       |       |       |       |       |       |             |
| SARS-CoV-2 NC_045512.2        | (17485) | CTAGAACCAGAATATTTCAATTCAGTGTGTAGACTTATGAAAACATATAGGTCCAGACATGTTCCCTCGGAACCTTGTCGGCGTTGTCCTGCTGAAA |       |       |       |       |       |       |       |       |             |
|                               |         |                                                                                                   |       |       |       |       |       |       |       |       | Section 188 |
| Hepatitis B virus NC_003977.2 | (17579) | 17579                                                                                             | 17590 | 17600 | 17610 | 17620 | 17630 | 17640 | 17650 | 17660 | 17672       |
|                               | (1)     | -----                                                                                             |       |       |       |       |       |       |       |       |             |
| SARS-CoV-2 NC_045512.2        | (17579) | TTGTTGACACTGTGAGTGCTTTGGTTTATGATAATAAGCTTAAAGCACATAAAGACAAATCAGCTCAATGCTTTAAAATGTTTTATAAGGGTGT    |       |       |       |       |       |       |       |       |             |
|                               |         |                                                                                                   |       |       |       |       |       |       |       |       | Section 189 |
| Hepatitis B virus NC_003977.2 | (17673) | 17673                                                                                             | 17680 | 17690 | 17700 | 17710 | 17720 | 17730 | 17740 | 17750 | 17766       |
|                               | (1)     | -----                                                                                             |       |       |       |       |       |       |       |       |             |
| SARS-CoV-2 NC_045512.2        | (17673) | TATCACGCATGATGTTTCATCTGCAATTAACAGGCCACAAATAGGCGTGGAAGAGAATTCCTTACACGTAACCCTGCTTGGAGAAAAGCTGTC     |       |       |       |       |       |       |       |       |             |

SARS-CoV-2 & Hepatitis B.apr

|                               |         |                                                                                                 |       |       |       |       |       |       |       |       |             |
|-------------------------------|---------|-------------------------------------------------------------------------------------------------|-------|-------|-------|-------|-------|-------|-------|-------|-------------|
|                               |         | Section 190                                                                                     |       |       |       |       |       |       |       |       |             |
|                               |         | (17767)                                                                                         | 17767 | 17780 | 17790 | 17800 | 17810 | 17820 | 17830 | 17840 | 17850 17860 |
| Hepatitis B virus NC_003977.2 | (1)     | -----                                                                                           |       |       |       |       |       |       |       |       |             |
| SARS-CoV-2 NC_045512.2        | (17767) | TTTATTTCACCTTATAATTACACAGAATGCTGTAGCCTCAAAGATTTTGGGACTACCAACTCAAAGTGTGATTTCATCACAGGGCTCAGAATATG |       |       |       |       |       |       |       |       |             |
|                               |         | Section 191                                                                                     |       |       |       |       |       |       |       |       |             |
|                               |         | (17861)                                                                                         | 17861 | 17870 | 17880 | 17890 | 17900 | 17910 | 17920 | 17930 | 17940 17954 |
| Hepatitis B virus NC_003977.2 | (1)     | -----                                                                                           |       |       |       |       |       |       |       |       |             |
| SARS-CoV-2 NC_045512.2        | (17861) | ACTATGTCATATTCACTCAAACCACTGAAACAGCTCACTCTTGTAATGTAAACAGATTTAATGTTGCTATTACCAGAGCAAAAGTAGGCATACT  |       |       |       |       |       |       |       |       |             |
|                               |         | Section 192                                                                                     |       |       |       |       |       |       |       |       |             |
|                               |         | (17955)                                                                                         | 17955 | 17960 | 17970 | 17980 | 17990 | 18000 | 18010 | 18020 | 18030 18048 |
| Hepatitis B virus NC_003977.2 | (1)     | -----                                                                                           |       |       |       |       |       |       |       |       |             |
| SARS-CoV-2 NC_045512.2        | (17955) | TTGCATAATGTCTGATAGAGACCTTTATGACAAGTTGCAATTTACAAGTCTTGAAATTCACGTAGGAATGTGGCAATTTTACAAAGCTGAAAT   |       |       |       |       |       |       |       |       |             |
|                               |         | Section 193                                                                                     |       |       |       |       |       |       |       |       |             |
|                               |         | (18049)                                                                                         | 18049 | 18060 | 18070 | 18080 | 18090 | 18100 | 18110 | 18120 | 18130 18142 |
| Hepatitis B virus NC_003977.2 | (20)    | AAACTCTGCAAGATCCCAGATGAGAGGCCTGTATTTCCTGCTGG--TGGCTCAGTTTCAGGAACAGTAAACCTGTGTCTGACTACTGCCT      |       |       |       |       |       |       |       |       |             |
| SARS-CoV-2 NC_045512.2        | (18049) | GTAAACAGGACTCTTTAAAGATTGTAGT-AAGGTAAATCACTGGGTT--ACATCTTACAAGGC-AC--CTACACCTC-AGTGTGACACTAA     |       |       |       |       |       |       |       |       |             |
|                               |         | Section 194                                                                                     |       |       |       |       |       |       |       |       |             |
|                               |         | (18143)                                                                                         | 18143 | 18150 | 18160 | 18170 | 18180 | 18190 | 18200 | 18210 | 18220 18236 |
| Hepatitis B virus NC_003977.2 | (110)   | CTCCCTTATCGTCAATCTTCTCGAGGA-TTGGGGACCTGCGCTGAACATGGAGAACATCACATCAGGATTCTTAGGACCCCTTCTCGTGTAC    |       |       |       |       |       |       |       |       |             |
| SARS-CoV-2 NC_045512.2        | (18135) | ATTCAAAACT-----GAAGGTTTATGTGTGACATACTGACCTAAGGACATGACCTATAGAGACT-CATCTCTATGA--TGGGTTTA          |       |       |       |       |       |       |       |       |             |
|                               |         | Section 195                                                                                     |       |       |       |       |       |       |       |       |             |
|                               |         | (18237)                                                                                         | 18237 | 18250 | 18260 | 18270 | 18280 | 18290 | 18300 | 18310 | 18320 18330 |
| Hepatitis B virus NC_003977.2 | (203)   | AGGCAGGGTTTTCGTTGTTGACAAGAAATCCTCA--CAATACCGCAGAGTCTAGACTCGTGGTGACTT--CTCTCA-ATTCTAGGGGAA       |       |       |       |       |       |       |       |       |             |
| SARS-CoV-2 NC_045512.2        | (18221) | AAATGAATTA--TCAAGTTAATGGTTACCTAACAT-GTT-TATCACCCGCAGAGAAGCTATAAGACATGTACGTGCAATGGAATGGCTTCGATG  |       |       |       |       |       |       |       |       |             |
|                               |         | Section 196                                                                                     |       |       |       |       |       |       |       |       |             |
|                               |         | (18331)                                                                                         | 18331 | 18340 | 18350 | 18360 | 18370 | 18380 | 18390 | 18400 | 18410 18424 |
| Hepatitis B virus NC_003977.2 | (290)   | CTACCGTGTGTCTTGGCCAAATTCGCAGTCCCCAACCTCAATCACTCACCAACCTCTTGTCTCAACTTTGTCTGGTTATCGCTGGATGTG      |       |       |       |       |       |       |       |       |             |
| SARS-CoV-2 NC_045512.2        | (18311) | TCGAG--GGGTGTCATGTACTAGAGAGCTGTTGGTACCAATTT-----ACCTTACAGCTAGGTTTTCTACAGG-TGTTAACC---           |       |       |       |       |       |       |       |       |             |

## SARS-CoV-2 & Hepatitis B.apr

|                               |         |             |          |           |          |           |          |               |         |        |           |            |        |        |          |        |         |         |         |           |        |      |
|-------------------------------|---------|-------------|----------|-----------|----------|-----------|----------|---------------|---------|--------|-----------|------------|--------|--------|----------|--------|---------|---------|---------|-----------|--------|------|
|                               |         | Section 197 |          |           |          |           |          |               |         |        |           |            |        |        |          |        |         |         |         |           |        |      |
| Hepatitis B virus NC_003977.2 | (18425) | 18425       | 18430    |           | 18440    |           | 18450    |               | 18460   |        | 18470     |            | 18480  |        | 18490    |        | 18500   |         | 18518   |           |        |      |
|                               | (384)   | TCTGC       | GGCGT    | ---       | TTTATCAT | TCTTCCTCT | TTCA     | TCTGCTGCTATGC | CTC     | ATCTT  | CTTGTT    | GGT        | TCTTC  | TGGACT | ATCA     | AGGTAT | TGTT    | GCCCG   | T       |           |        |      |
| SARS-CoV-2 NC_045512.2        | (18389) | TAGTT       | GCTGT    | ACC       | TACAGGT  | TATGTTGA  | TACAC    | CTAATAATA---  | CAG     | ATT    | TTTCCAGAG | GT         | TAG--- | TGCTAA | ACCA     | CCGCC  | TGGAGAT | CAAT    |         |           |        |      |
|                               |         | Section 198 |          |           |          |           |          |               |         |        |           |            |        |        |          |        |         |         |         |           |        |      |
| Hepatitis B virus NC_003977.2 | (18519) | 18519       |          | 18530     |          | 18540     |          | 18550         |         | 18560  |           | 18570      |        | 18580  |          | 18590  |         | 18600   |         | 18612     |        |      |
|                               | (474)   | TTGTC       | CTTAAT   | TCCAGGA   | TCCCTC   | AACA      | AAAC     | AGCAC         | GGGACC  | ATGCCG | GAC       | CTGCATGACT | ACTG   | CTCA   | AGGAA    | CCTC   | TATGT   | ATCC    | CTCTGT  |           |        |      |
| SARS-CoV-2 NC_045512.2        | (18476) | TTAAA       | CACCTCAT | TACCACT   | TATGT    | ACA       | AAAG     | ACTT          | CCTTGA  | AT     | GTA       | GTCGTATAA  | AGAT   | TGTAC  | ----     | AAATGT | TAGTGA  | CACAC   | ----    |           |        |      |
|                               |         | Section 199 |          |           |          |           |          |               |         |        |           |            |        |        |          |        |         |         |         |           |        |      |
| Hepatitis B virus NC_003977.2 | (18613) | 18613       |          | 18620     |          | 18630     |          | 18640         |         | 18650  |           | 18660      |        | 18670  |          | 18680  |         | 18690   |         | 18706     |        |      |
|                               | (568)   | TGCTGTACC   | AAA      | CTTCGGAC  | GGAA     | ATTG      | CACCT    | TGTATT        | CCCCAT  | CCC    | ATCAT     | CTGTGG     | GGTTTC | GGAAA  | ATTCC    | TATGGG | AGTGG   | CCCTAG  | ACCC    |           |        |      |
| SARS-CoV-2 NC_045512.2        | (18560) | -TTAA----   | AAAT     | CTCTCTGAC | AG       | TCTG      | TATT     | TGT           | -----   | CTT    | ATGG      | ----       | G      | CACAT  | GGCTTTGA | GTTGAC | ATCTAT  | GAAGT   | ATTTT   |           |        |      |
|                               |         | Section 200 |          |           |          |           |          |               |         |        |           |            |        |        |          |        |         |         |         |           |        |      |
| Hepatitis B virus NC_003977.2 | (18707) | 18707       |          | 18720     |          | 18730     |          | 18740         |         | 18750  |           | 18760      |        | 18770  |          | 18780  |         | 18790   |         | 18800     |        |      |
|                               | (662)   | GT          | TTCTCCT  | TGGCT     | CAGTT    | TTACTAG   | TGC      | ATTGTT        | TCA     | GTGGT  | TTCGTAG   | GGCT       | TTTCC  | CCACTG | TTGGCT   | TTCAG  | TTA     | TATG    | GATGAT  | TGGTA     |        |      |
| SARS-CoV-2 NC_045512.2        | (18634) | GT          | GAAAA    | -TAG      | GAC      | --CT      | GAGCGCAC | CTG           | TTGTC   | TAT    | GTGAT     | TAGAC      | GTCC   | CACATG | CTTTTCC  | ACTG   | CTT     | CAGAC   | ACTTATG | CC-----TG |        |      |
|                               |         | Section 201 |          |           |          |           |          |               |         |        |           |            |        |        |          |        |         |         |         |           |        |      |
| Hepatitis B virus NC_003977.2 | (18801) | 18801       |          | 18810     |          | 18820     |          | 18830         |         | 18840  |           | 18850      |        | 18860  |          | 18870  |         | 18880   |         | 18894     |        |      |
|                               | (756)   | TTGG        | GGGCCA   | AGTCT     | GTACAG   | CATCT     | TGAG     | TCCT          | TTTT    | TACCG  | TGTT      | ACCA       | ATT    | TTCTTT | TGCTTT   | GGGTAT | ACATT   | TAAAC   | --CCT   | AACAA     |        |      |
| SARS-CoV-2 NC_045512.2        | (18717) | TTGG        | C-AT-C   | ATTCT     | ATTGG    | ATTG      | ATTAC    | GTCTAT        | TAATC   | CGTT   | TATGA     | TTGAT      | GTTCA  | CAAT   | TGGGG    | TTTAC  | AGG--   | TAA     | CTACAA  | AGCAA     |        |      |
|                               |         | Section 202 |          |           |          |           |          |               |         |        |           |            |        |        |          |        |         |         |         |           |        |      |
| Hepatitis B virus NC_003977.2 | (18895) | 18895       | 18900    |           | 18910    |           | 18920    |               | 18930   |        | 18940     |            | 18950  |        | 18960    |        | 18970   |         | 18988   |           |        |      |
|                               | (848)   | AACAA       | AGAGAT   | TGGG      | GTACTCT  | CTAAAT    | TTTTAT   | TGGGTT        | ATGT    | CAT    | TGGAT     | TGT        | TATGG  | GTCT   | TGCT     | CAACA  | GAACAC  | ATCAT   | TACAA   | AAAAT     | CAAAA  |      |
| SARS-CoV-2 NC_045512.2        | (18807) | CCATG       | ATCTGT   | TATT      | GTCA     | AGTC      | CATGG    | TAA           | TG--CAC | ATGT   | AGCTAG    | TAGT       | TGTG   | ATGCA  | ATCAT    | GATAG  | CTAGG   | TGCTA   | A-GCT   | TGTCC     | ACGAG  | TGCT |
|                               |         | Section 203 |          |           |          |           |          |               |         |        |           |            |        |        |          |        |         |         |         |           |        |      |
| Hepatitis B virus NC_003977.2 | (18989) | 18989       |          | 19000     |          | 19010     |          | 19020         |         | 19030  |           | 19040      |        | 19050  |          | 19060  |         | 19070   |         | 19082     |        |      |
|                               | (942)   | GAA         | T--GTTT  | TAGAA     | ACTTC    | CTATT     | AACAGG   | CCTAT         | TGAT    | TGG    | -AAAGTA   | TGTC       | ACG    | AAT    | TGT      | GGG    | TCTTTT  | TGG     | GTT     | TTGCTGC   | CCCTT  | TTA  |
| SARS-CoV-2 NC_045512.2        | (18896) | TTGT        | TAAAGCGT | GTTGA     | CTGGA    | CTATT     | GAAATAT  | CCTAT         | AAAT    | TG     | TGTG      | ATGAAC     | TGA    | AGA    | TTAAT    | GCGG   | CTTGT   | TAGAAAG | G       | -TTCA     | ACACAT | GTTG |

# SARS-CoV-2 & Hepatitis B.apr

|                                      |         |                                                                                                 |       |       |       |       |       |       |       |       |       |             |
|--------------------------------------|---------|-------------------------------------------------------------------------------------------------|-------|-------|-------|-------|-------|-------|-------|-------|-------|-------------|
|                                      |         |                                                                                                 |       |       |       |       |       |       |       |       |       | Section 204 |
|                                      |         |                                                                                                 |       |       |       |       |       |       |       |       |       |             |
| Hepatitis B virus NC_003977.2 (1033) | (19083) | 19083                                                                                           | 19090 | 19100 | 19110 | 19120 | 19130 | 19140 | 19150 | 19160 | 19176 |             |
|                                      |         | CACAAATGTTATCCTGCGTTGATGCCTTTGTATGCATGTATTCAATCTAAGCAGGCTTTTACATTCTCTCGCCAACTTACAAGGCCTTTCTGTG  |       |       |       |       |       |       |       |       |       |             |
| SARS-CoV-2 NC_045512.2 (18989)       |         |                                                                                                 |       |       |       |       |       |       |       |       |       |             |
|                                      |         |                                                                                                 |       |       |       |       |       |       |       |       |       |             |
|                                      |         |                                                                                                 |       |       |       |       |       |       |       |       |       | Section 205 |
|                                      |         |                                                                                                 |       |       |       |       |       |       |       |       |       |             |
| Hepatitis B virus NC_003977.2 (1177) | (19177) | 19177                                                                                           | 19190 | 19200 | 19210 | 19220 | 19230 | 19240 | 19250 | 19260 | 19270 |             |
|                                      |         | TAAACAAATACCAGACCTTTACCGCCGTGCCCCGGCAACGGCAGGCTGTGTGCCAAGTGT-TGCTGACGCAACCCCCACTGGC-TGGGGCCTTG  |       |       |       |       |       |       |       |       |       |             |
| SARS-CoV-2 NC_045512.2 (19081)       |         |                                                                                                 |       |       |       |       |       |       |       |       |       |             |
|                                      |         |                                                                                                 |       |       |       |       |       |       |       |       |       |             |
|                                      |         |                                                                                                 |       |       |       |       |       |       |       |       |       | Section 206 |
|                                      |         |                                                                                                 |       |       |       |       |       |       |       |       |       |             |
| Hepatitis B virus NC_003977.2 (1218) | (19271) | 19271                                                                                           | 19280 | 19290 | 19300 | 19310 | 19320 | 19330 | 19340 | 19350 | 19364 |             |
|                                      |         | GTCATGGGCCATCAGCGCATGCGTGGAAACCTTTTCGGCTCCTCTGCCGATCCATACGCGGAACTC-CTAG----CGCTTGT-----TTT      |       |       |       |       |       |       |       |       |       |             |
| SARS-CoV-2 NC_045512.2 (19155)       |         |                                                                                                 |       |       |       |       |       |       |       |       |       |             |
|                                      |         |                                                                                                 |       |       |       |       |       |       |       |       |       |             |
|                                      |         |                                                                                                 |       |       |       |       |       |       |       |       |       | Section 207 |
|                                      |         |                                                                                                 |       |       |       |       |       |       |       |       |       |             |
| Hepatitis B virus NC_003977.2 (1299) | (19365) | 19365                                                                                           | 19370 | 19380 | 19390 | 19400 | 19410 | 19420 | 19430 | 19440 | 19458 |             |
|                                      |         | GCTCGCAGCAGGTCGAGCAAAACATTTATCGGGACTGATAACTCTGTTGTTCCTATCCGCAAAATATACATCGTTTCCATGGCTGCT-AGGCTGT |       |       |       |       |       |       |       |       |       |             |
| SARS-CoV-2 NC_045512.2 (19242)       |         |                                                                                                 |       |       |       |       |       |       |       |       |       |             |
|                                      |         |                                                                                                 |       |       |       |       |       |       |       |       |       |             |
|                                      |         |                                                                                                 |       |       |       |       |       |       |       |       |       | Section 208 |
|                                      |         |                                                                                                 |       |       |       |       |       |       |       |       |       |             |
| Hepatitis B virus NC_003977.2 (1392) | (19459) | 19459                                                                                           | 19470 | 19480 | 19490 | 19500 | 19510 | 19520 | 19530 | 19540 | 19552 |             |
|                                      |         | GCTGCC-----AA-CTGGATCCTGCGCGGGACGTCTTTGT--TTACGTCCTGCGCTGAATCTGCGGACGACCTTCTCGGGGTCGCTT         |       |       |       |       |       |       |       |       |       |             |
| SARS-CoV-2 NC_045512.2 (19326)       |         |                                                                                                 |       |       |       |       |       |       |       |       |       |             |
|                                      |         |                                                                                                 |       |       |       |       |       |       |       |       |       |             |
|                                      |         |                                                                                                 |       |       |       |       |       |       |       |       |       | Section 209 |
|                                      |         |                                                                                                 |       |       |       |       |       |       |       |       |       |             |
| Hepatitis B virus NC_003977.2 (1478) | (19553) | 19553                                                                                           | 19560 | 19570 | 19580 | 19590 | 19600 | 19610 | 19620 | 19630 | 19646 |             |
|                                      |         | GGGACTCTCTCGTCCCCCTCTCCGTCTGCGGTCCGACGACACCGGGGCGCAC----CTCTCTTTACGCGGACTCCCCTGTCTGTGCCTTCTCA   |       |       |       |       |       |       |       |       |       |             |
| SARS-CoV-2 NC_045512.2 (19417)       |         |                                                                                                 |       |       |       |       |       |       |       |       |       |             |
|                                      |         |                                                                                                 |       |       |       |       |       |       |       |       |       |             |
|                                      |         |                                                                                                 |       |       |       |       |       |       |       |       |       | Section 210 |
|                                      |         |                                                                                                 |       |       |       |       |       |       |       |       |       |             |
| Hepatitis B virus NC_003977.2 (1568) | (19647) | 19647                                                                                           | 19660 | 19670 | 19680 | 19690 | 19700 | 19710 | 19720 | 19730 | 19740 |             |
|                                      |         | TCGCGGACCGTGTGCACTTCG----CTTCACCTCTGCAACGTCGCAAGGAGACCAACGTGAACGCCCACCA----AATATTGCTCAAGGTCTT   |       |       |       |       |       |       |       |       |       |             |
| SARS-CoV-2 NC_045512.2 (19504)       |         |                                                                                                 |       |       |       |       |       |       |       |       |       |             |
|                                      |         |                                                                                                 |       |       |       |       |       |       |       |       |       |             |

SARS-CoV-2 & Hepatitis B.apr

|                               |         |                                                             |  |  |  |  |  |  |  |  |  |             |       |       |       |       |       |       |       |       |       |     |      |      |     |    |    |    |     |    |     |     |    |     |     |    |    |     |      |   |   |   |   |   |   |   |   |   |   |   |   |   |   |   |   |   |   |   |   |   |   |   |   |   |   |   |   |   |   |   |   |   |   |   |   |   |   |   |   |   |   |   |   |   |   |   |   |   |   |   |   |   |   |   |   |   |   |   |   |   |   |   |   |   |   |   |   |   |   |   |   |   |   |   |   |   |   |   |   |   |   |   |   |   |   |   |   |   |   |   |   |   |   |   |   |   |   |   |   |   |   |   |   |   |   |   |   |   |   |   |   |   |   |   |   |   |   |   |   |   |   |   |   |   |   |   |   |   |   |   |   |   |   |   |   |   |   |   |   |   |   |   |   |   |   |   |   |   |   |   |   |   |   |   |   |   |   |   |   |   |   |   |   |   |   |   |   |   |   |   |   |   |   |   |   |   |   |   |   |   |   |   |   |   |   |   |   |   |   |   |   |   |   |   |   |   |   |   |   |   |   |   |   |   |   |   |   |   |   |   |   |   |   |   |   |   |   |   |   |   |   |   |   |   |   |   |   |   |   |   |   |   |   |   |   |   |   |   |   |   |   |   |   |   |   |   |   |   |   |   |   |   |   |   |   |   |   |   |   |   |   |   |   |   |   |   |   |   |   |   |   |   |   |   |   |   |   |   |   |   |   |   |   |   |   |   |   |   |   |   |   |   |   |   |   |   |   |   |   |   |   |   |   |   |   |   |   |   |   |   |   |   |   |   |   |   |   |   |   |   |   |   |   |   |   |   |   |   |   |   |   |   |   |   |   |   |   |   |   |   |   |   |   |   |   |   |   |   |   |   |   |   |   |   |   |   |   |   |   |   |   |   |   |   |   |   |   |   |   |   |   |   |   |   |   |   |   |   |   |   |   |   |   |   |   |   |   |   |   |   |   |   |   |   |   |   |   |   |   |   |   |   |   |   |   |   |   |   |   |   |   |   |   |   |   |   |   |   |   |   |   |   |   |   |   |   |   |   |   |   |   |   |   |   |   |   |   |   |   |   |   |   |   |   |   |   |   |   |   |   |   |   |   |   |   |   |   |   |   |   |   |   |   |   |   |   |   |   |   |   |   |   |   |   |   |   |   |   |   |   |   |   |   |   |   |   |   |   |   |   |   |   |   |   |   |   |   |   |   |   |   |   |   |   |   |   |   |   |   |   |   |   |   |   |   |   |   |   |   |   |   |   |   |   |   |   |   |   |   |   |   |   |   |   |   |   |   |   |   |   |   |   |   |   |   |   |   |   |   |   |   |   |   |   |   |   |   |   |   |   |   |   |   |   |   |   |   |   |   |   |   |   |   |   |   |   |   |   |   |   |   |   |   |   |   |   |   |   |   |   |   |   |   |   |   |   |   |   |   |   |   |   |   |   |   |   |   |   |   |   |   |   |   |   |   |   |   |   |   |   |   |   |   |   |   |   |   |   |   |   |   |   |   |   |   |   |   |   |   |   |   |   |   |   |   |   |   |   |   |   |   |   |   |   |   |   |   |   |   |   |   |   |   |   |   |   |   |   |   |   |   |   |   |   |   |   |   |   |   |   |   |   |   |   |   |   |   |   |   |   |   |   |   |   |   |   |   |   |   |   |   |   |   |   |   |   |   |   |   |   |   |   |   |   |   |   |   |   |   |   |   |   |   |   |   |   |   |   |   |   |   |   |   |   |   |   |   |   |   |   |   |   |   |   |   |   |   |   |   |   |   |   |   |   |   |   |   |   |   |   |   |   |   |   |   |   |   |   |   |   |   |   |   |   |   |   |   |   |   |   |   |   |   |   |   |   |   |   |   |   |   |   |   |   |   |   |   |   |   |   |   |   |   |   |   |   |   |   |   |   |   |   |   |   |   |   |   |   |   |   |   |   |   |   |   |   |   |   |   |   |   |   |   |   |   |   |   |   |   |   |   |   |   |   |   |   |   |   |   |   |   |   |   |   |   |   |   |   |   |   |   |   |   |   |   |   |   |   |   |   |   |   |   |   |   |   |   |   |   |   |   |   |   |   |   |   |   |   |   |   |   |   |   |   |   |   |   |   |   |   |   |   |   |   |
|-------------------------------|---------|-------------------------------------------------------------|--|--|--|--|--|--|--|--|--|-------------|-------|-------|-------|-------|-------|-------|-------|-------|-------|-----|------|------|-----|----|----|----|-----|----|-----|-----|----|-----|-----|----|----|-----|------|---|---|---|---|---|---|---|---|---|---|---|---|---|---|---|---|---|---|---|---|---|---|---|---|---|---|---|---|---|---|---|---|---|---|---|---|---|---|---|---|---|---|---|---|---|---|---|---|---|---|---|---|---|---|---|---|---|---|---|---|---|---|---|---|---|---|---|---|---|---|---|---|---|---|---|---|---|---|---|---|---|---|---|---|---|---|---|---|---|---|---|---|---|---|---|---|---|---|---|---|---|---|---|---|---|---|---|---|---|---|---|---|---|---|---|---|---|---|---|---|---|---|---|---|---|---|---|---|---|---|---|---|---|---|---|---|---|---|---|---|---|---|---|---|---|---|---|---|---|---|---|---|---|---|---|---|---|---|---|---|---|---|---|---|---|---|---|---|---|---|---|---|---|---|---|---|---|---|---|---|---|---|---|---|---|---|---|---|---|---|---|---|---|---|---|---|---|---|---|---|---|---|---|---|---|---|---|---|---|---|---|---|---|---|---|---|---|---|---|---|---|---|---|---|---|---|---|---|---|---|---|---|---|---|---|---|---|---|---|---|---|---|---|---|---|---|---|---|---|---|---|---|---|---|---|---|---|---|---|---|---|---|---|---|---|---|---|---|---|---|---|---|---|---|---|---|---|---|---|---|---|---|---|---|---|---|---|---|---|---|---|---|---|---|---|---|---|---|---|---|---|---|---|---|---|---|---|---|---|---|---|---|---|---|---|---|---|---|---|---|---|---|---|---|---|---|---|---|---|---|---|---|---|---|---|---|---|---|---|---|---|---|---|---|---|---|---|---|---|---|---|---|---|---|---|---|---|---|---|---|---|---|---|---|---|---|---|---|---|---|---|---|---|---|---|---|---|---|---|---|---|---|---|---|---|---|---|---|---|---|---|---|---|---|---|---|---|---|---|---|---|---|---|---|---|---|---|---|---|---|---|---|---|---|---|---|---|---|---|---|---|---|---|---|---|---|---|---|---|---|---|---|---|---|---|---|---|---|---|---|---|---|---|---|---|---|---|---|---|---|---|---|---|---|---|---|---|---|---|---|---|---|---|---|---|---|---|---|---|---|---|---|---|---|---|---|---|---|---|---|---|---|---|---|---|---|---|---|---|---|---|---|---|---|---|---|---|---|---|---|---|---|---|---|---|---|---|---|---|---|---|---|---|---|---|---|---|---|---|---|---|---|---|---|---|---|---|---|---|---|---|---|---|---|---|---|---|---|---|---|---|---|---|---|---|---|---|---|---|---|---|---|---|---|---|---|---|---|---|---|---|---|---|---|---|---|---|---|---|---|---|---|---|---|---|---|---|---|---|---|---|---|---|---|---|---|---|---|---|---|---|---|---|---|---|---|---|---|---|---|---|---|---|---|---|---|---|---|---|---|---|---|---|---|---|---|---|---|---|---|---|---|---|---|---|---|---|---|---|---|---|---|---|---|---|---|---|---|---|---|---|---|---|---|---|---|---|---|---|---|---|---|---|---|---|---|---|---|---|---|---|---|---|---|---|---|---|---|---|---|---|---|---|---|---|---|---|---|---|---|---|---|---|---|---|---|---|---|---|---|---|---|---|---|---|---|---|---|---|---|---|---|---|---|---|---|---|---|---|---|---|---|---|---|---|---|---|---|---|---|---|---|---|---|---|---|---|---|---|---|---|---|---|---|---|---|---|---|---|---|---|---|---|---|---|---|---|---|---|---|---|---|---|---|---|---|---|---|---|---|---|---|---|---|---|---|---|---|---|---|---|---|---|---|---|---|---|---|---|---|---|---|---|---|---|---|---|---|---|---|---|---|---|---|---|---|---|---|---|---|---|---|---|---|---|---|---|---|---|---|---|---|---|---|---|---|---|---|---|---|---|---|---|---|---|---|---|---|---|---|---|---|---|---|---|---|---|---|---|---|---|---|---|---|---|---|---|---|---|---|---|---|---|---|---|---|---|---|---|---|---|---|---|---|---|---|---|---|---|---|---|---|---|---|---|---|---|---|---|---|---|---|---|---|---|---|---|---|---|---|---|---|---|---|---|---|---|---|---|---|---|---|---|---|---|
|                               |         |                                                             |  |  |  |  |  |  |  |  |  | Section 211 |       |       |       |       |       |       |       |       |       |     |      |      |     |    |    |    |     |    |     |     |    |     |     |    |    |     |      |   |   |   |   |   |   |   |   |   |   |   |   |   |   |   |   |   |   |   |   |   |   |   |   |   |   |   |   |   |   |   |   |   |   |   |   |   |   |   |   |   |   |   |   |   |   |   |   |   |   |   |   |   |   |   |   |   |   |   |   |   |   |   |   |   |   |   |   |   |   |   |   |   |   |   |   |   |   |   |   |   |   |   |   |   |   |   |   |   |   |   |   |   |   |   |   |   |   |   |   |   |   |   |   |   |   |   |   |   |   |   |   |   |   |   |   |   |   |   |   |   |   |   |   |   |   |   |   |   |   |   |   |   |   |   |   |   |   |   |   |   |   |   |   |   |   |   |   |   |   |   |   |   |   |   |   |   |   |   |   |   |   |   |   |   |   |   |   |   |   |   |   |   |   |   |   |   |   |   |   |   |   |   |   |   |   |   |   |   |   |   |   |   |   |   |   |   |   |   |   |   |   |   |   |   |   |   |   |   |   |   |   |   |   |   |   |   |   |   |   |   |   |   |   |   |   |   |   |   |   |   |   |   |   |   |   |   |   |   |   |   |   |   |   |   |   |   |   |   |   |   |   |   |   |   |   |   |   |   |   |   |   |   |   |   |   |   |   |   |   |   |   |   |   |   |   |   |   |   |   |   |   |   |   |   |   |   |   |   |   |   |   |   |   |   |   |   |   |   |   |   |   |   |   |   |   |   |   |   |   |   |   |   |   |   |   |   |   |   |   |   |   |   |   |   |   |   |   |   |   |   |   |   |   |   |   |   |   |   |   |   |   |   |   |   |   |   |   |   |   |   |   |   |   |   |   |   |   |   |   |   |   |   |   |   |   |   |   |   |   |   |   |   |   |   |   |   |   |   |   |   |   |   |   |   |   |   |   |   |   |   |   |   |   |   |   |   |   |   |   |   |   |   |   |   |   |   |   |   |   |   |   |   |   |   |   |   |   |   |   |   |   |   |   |   |   |   |   |   |   |   |   |   |   |   |   |   |   |   |   |   |   |   |   |   |   |   |   |   |   |   |   |   |   |   |   |   |   |   |   |   |   |   |   |   |   |   |   |   |   |   |   |   |   |   |   |   |   |   |   |   |   |   |   |   |   |   |   |   |   |   |   |   |   |   |   |   |   |   |   |   |   |   |   |   |   |   |   |   |   |   |   |   |   |   |   |   |   |   |   |   |   |   |   |   |   |   |   |   |   |   |   |   |   |   |   |   |   |   |   |   |   |   |   |   |   |   |   |   |   |   |   |   |   |   |   |   |   |   |   |   |   |   |   |   |   |   |   |   |   |   |   |   |   |   |   |   |   |   |   |   |   |   |   |   |   |   |   |   |   |   |   |   |   |   |   |   |   |   |   |   |   |   |   |   |   |   |   |   |   |   |   |   |   |   |   |   |   |   |   |   |   |   |   |   |   |   |   |   |   |   |   |   |   |   |   |   |   |   |   |   |   |   |   |   |   |   |   |   |   |   |   |   |   |   |   |   |   |   |   |   |   |   |   |   |   |   |   |   |   |   |   |   |   |   |   |   |   |   |   |   |   |   |   |   |   |   |   |   |   |   |   |   |   |   |   |   |   |   |   |   |   |   |   |   |   |   |   |   |   |   |   |   |   |   |   |   |   |   |   |   |   |   |   |   |   |   |   |   |   |   |   |   |   |   |   |   |   |   |   |   |   |   |   |   |   |   |   |   |   |   |   |   |   |   |   |   |   |   |   |   |   |   |   |   |   |   |   |   |   |   |   |   |   |   |   |   |   |   |   |   |   |   |   |   |   |   |   |   |   |   |   |   |   |   |   |   |   |   |   |   |   |   |   |   |   |   |   |   |   |   |   |   |   |   |   |   |   |   |   |   |   |   |   |   |   |   |   |   |   |   |   |   |   |   |   |   |   |   |   |   |   |   |   |   |   |   |   |   |   |   |   |   |   |   |   |   |   |   |   |   |   |   |   |   |   |   |   |   |   |   |   |   |   |   |   |   |   |   |   |   |   |   |   |   |   |   |   |   |   |   |   |   |   |   |   |   |   |   |   |   |   |   |   |   |
|                               |         |                                                             |  |  |  |  |  |  |  |  |  | 19741       | 19750 | 19760 | 19770 | 19780 | 19790 | 19800 | 19810 | 19820 | 19834 |     |      |      |     |    |    |    |     |    |     |     |    |     |     |    |    |     |      |   |   |   |   |   |   |   |   |   |   |   |   |   |   |   |   |   |   |   |   |   |   |   |   |   |   |   |   |   |   |   |   |   |   |   |   |   |   |   |   |   |   |   |   |   |   |   |   |   |   |   |   |   |   |   |   |   |   |   |   |   |   |   |   |   |   |   |   |   |   |   |   |   |   |   |   |   |   |   |   |   |   |   |   |   |   |   |   |   |   |   |   |   |   |   |   |   |   |   |   |   |   |   |   |   |   |   |   |   |   |   |   |   |   |   |   |   |   |   |   |   |   |   |   |   |   |   |   |   |   |   |   |   |   |   |   |   |   |   |   |   |   |   |   |   |   |   |   |   |   |   |   |   |   |   |   |   |   |   |   |   |   |   |   |   |   |   |   |   |   |   |   |   |   |   |   |   |   |   |   |   |   |   |   |   |   |   |   |   |   |   |   |   |   |   |   |   |   |   |   |   |   |   |   |   |   |   |   |   |   |   |   |   |   |   |   |   |   |   |   |   |   |   |   |   |   |   |   |   |   |   |   |   |   |   |   |   |   |   |   |   |   |   |   |   |   |   |   |   |   |   |   |   |   |   |   |   |   |   |   |   |   |   |   |   |   |   |   |   |   |   |   |   |   |   |   |   |   |   |   |   |   |   |   |   |   |   |   |   |   |   |   |   |   |   |   |   |   |   |   |   |   |   |   |   |   |   |   |   |   |   |   |   |   |   |   |   |   |   |   |   |   |   |   |   |   |   |   |   |   |   |   |   |   |   |   |   |   |   |   |   |   |   |   |   |   |   |   |   |   |   |   |   |   |   |   |   |   |   |   |   |   |   |   |   |   |   |   |   |   |   |   |   |   |   |   |   |   |   |   |   |   |   |   |   |   |   |   |   |   |   |   |   |   |   |   |   |   |   |   |   |   |   |   |   |   |   |   |   |   |   |   |   |   |   |   |   |   |   |   |   |   |   |   |   |   |   |   |   |   |   |   |   |   |   |   |   |   |   |   |   |   |   |   |   |   |   |   |   |   |   |   |   |   |   |   |   |   |   |   |   |   |   |   |   |   |   |   |   |   |   |   |   |   |   |   |   |   |   |   |   |   |   |   |   |   |   |   |   |   |   |   |   |   |   |   |   |   |   |   |   |   |   |   |   |   |   |   |   |   |   |   |   |   |   |   |   |   |   |   |   |   |   |   |   |   |   |   |   |   |   |   |   |   |   |   |   |   |   |   |   |   |   |   |   |   |   |   |   |   |   |   |   |   |   |   |   |   |   |   |   |   |   |   |   |   |   |   |   |   |   |   |   |   |   |   |   |   |   |   |   |   |   |   |   |   |   |   |   |   |   |   |   |   |   |   |   |   |   |   |   |   |   |   |   |   |   |   |   |   |   |   |   |   |   |   |   |   |   |   |   |   |   |   |   |   |   |   |   |   |   |   |   |   |   |   |   |   |   |   |   |   |   |   |   |   |   |   |   |   |   |   |   |   |   |   |   |   |   |   |   |   |   |   |   |   |   |   |   |   |   |   |   |   |   |   |   |   |   |   |   |   |   |   |   |   |   |   |   |   |   |   |   |   |   |   |   |   |   |   |   |   |   |   |   |   |   |   |   |   |   |   |   |   |   |   |   |   |   |   |   |   |   |   |   |   |   |   |   |   |   |   |   |   |   |   |   |   |   |   |   |   |   |   |   |   |   |   |   |   |   |   |   |   |   |   |   |   |   |   |   |   |   |   |   |   |   |   |   |   |   |   |   |   |   |   |   |   |   |   |   |   |   |   |   |   |   |   |   |   |   |   |   |   |   |   |   |   |   |   |   |   |   |   |   |   |   |   |   |   |   |   |   |   |   |   |   |   |   |   |   |   |   |   |   |   |   |   |   |   |   |   |   |   |   |   |   |   |   |   |   |   |   |   |   |   |   |   |   |   |   |   |   |   |   |   |   |   |   |   |   |   |   |   |   |   |   |   |   |   |   |   |   |   |   |   |   |   |   |   |   |   |   |   |   |   |   |   |   |   |   |   |   |   |   |   |   |   |   |   |   |   |   |   |   |
| Hepatitis B virus NC_003977.2 | (1654)  | ACATAAGAGGACTCTTGGACTCTCAGCAATGTTCACGACCGACCTTGAGGCATACATTC |  |  |  |  |  |  |  |  |  |             | AAA   | GA    | CT    | GTT   | ----  | TGTT  | TAA   | AAG   | ACT   | GGG | AG   | GAGT |     |    |    |    |     |    |     |     |    |     |     |    |    |     |      |   |   |   |   |   |   |   |   |   |   |   |   |   |   |   |   |   |   |   |   |   |   |   |   |   |   |   |   |   |   |   |   |   |   |   |   |   |   |   |   |   |   |   |   |   |   |   |   |   |   |   |   |   |   |   |   |   |   |   |   |   |   |   |   |   |   |   |   |   |   |   |   |   |   |   |   |   |   |   |   |   |   |   |   |   |   |   |   |   |   |   |   |   |   |   |   |   |   |   |   |   |   |   |   |   |   |   |   |   |   |   |   |   |   |   |   |   |   |   |   |   |   |   |   |   |   |   |   |   |   |   |   |   |   |   |   |   |   |   |   |   |   |   |   |   |   |   |   |   |   |   |   |   |   |   |   |   |   |   |   |   |   |   |   |   |   |   |   |   |   |   |   |   |   |   |   |   |   |   |   |   |   |   |   |   |   |   |   |   |   |   |   |   |   |   |   |   |   |   |   |   |   |   |   |   |   |   |   |   |   |   |   |   |   |   |   |   |   |   |   |   |   |   |   |   |   |   |   |   |   |   |   |   |   |   |   |   |   |   |   |   |   |   |   |   |   |   |   |   |   |   |   |   |   |   |   |   |   |   |   |   |   |   |   |   |   |   |   |   |   |   |   |   |   |   |   |   |   |   |   |   |   |   |   |   |   |   |   |   |   |   |   |   |   |   |   |   |   |   |   |   |   |   |   |   |   |   |   |   |   |   |   |   |   |   |   |   |   |   |   |   |   |   |   |   |   |   |   |   |   |   |   |   |   |   |   |   |   |   |   |   |   |   |   |   |   |   |   |   |   |   |   |   |   |   |   |   |   |   |   |   |   |   |   |   |   |   |   |   |   |   |   |   |   |   |   |   |   |   |   |   |   |   |   |   |   |   |   |   |   |   |   |   |   |   |   |   |   |   |   |   |   |   |   |   |   |   |   |   |   |   |   |   |   |   |   |   |   |   |   |   |   |   |   |   |   |   |   |   |   |   |   |   |   |   |   |   |   |   |   |   |   |   |   |   |   |   |   |   |   |   |   |   |   |   |   |   |   |   |   |   |   |   |   |   |   |   |   |   |   |   |   |   |   |   |   |   |   |   |   |   |   |   |   |   |   |   |   |   |   |   |   |   |   |   |   |   |   |   |   |   |   |   |   |   |   |   |   |   |   |   |   |   |   |   |   |   |   |   |   |   |   |   |   |   |   |   |   |   |   |   |   |   |   |   |   |   |   |   |   |   |   |   |   |   |   |   |   |   |   |   |   |   |   |   |   |   |   |   |   |   |   |   |   |   |   |   |   |   |   |   |   |   |   |   |   |   |   |   |   |   |   |   |   |   |   |   |   |   |   |   |   |   |   |   |   |   |   |   |   |   |   |   |   |   |   |   |   |   |   |   |   |   |   |   |   |   |   |   |   |   |   |   |   |   |   |   |   |   |   |   |   |   |   |   |   |   |   |   |   |   |   |   |   |   |   |   |   |   |   |   |   |   |   |   |   |   |   |   |   |   |   |   |   |   |   |   |   |   |   |   |   |   |   |   |   |   |   |   |   |   |   |   |   |   |   |   |   |   |   |   |   |   |   |   |   |   |   |   |   |   |   |   |   |   |   |   |   |   |   |   |   |   |   |   |   |   |   |   |   |   |   |   |   |   |   |   |   |   |   |   |   |   |   |   |   |   |   |   |   |   |   |   |   |   |   |   |   |   |   |   |   |   |   |   |   |   |   |   |   |   |   |   |   |   |   |   |   |   |   |   |   |   |   |   |   |   |   |   |   |   |   |   |   |   |   |   |   |   |   |   |   |   |   |   |   |   |   |   |   |   |   |   |   |   |   |   |   |   |   |   |   |   |   |   |   |   |   |   |   |   |   |   |   |   |   |   |   |   |   |   |   |   |   |   |   |   |   |   |   |   |   |   |   |   |   |   |   |   |   |   |   |   |   |   |   |   |   |   |   |   |   |   |   |   |   |   |   |   |   |   |   |   |   |   |   |   |   |   |   |   |   |   |   |   |   |   |   |   |   |   |   |   |   |   |   |   |   |   |   |   |   |   |   |   |
| SARS-CoV-2 NC_045512.2        | (19596) | -CTGGA-A-CACTTTTACAGA                                       |  |  |  |  |  |  |  |  |  |             | CT    | T     | CAG   | AG    | TT    | TAG   | A--   | AAT   | GT    | GG  | CTTT | TAA  | T   | GT | T  | GT | AAA | T  | AAG | GG  | AC | ACT | GGG | T  | GA | AGT |      |   |   |   |   |   |   |   |   |   |   |   |   |   |   |   |   |   |   |   |   |   |   |   |   |   |   |   |   |   |   |   |   |   |   |   |   |   |   |   |   |   |   |   |   |   |   |   |   |   |   |   |   |   |   |   |   |   |   |   |   |   |   |   |   |   |   |   |   |   |   |   |   |   |   |   |   |   |   |   |   |   |   |   |   |   |   |   |   |   |   |   |   |   |   |   |   |   |   |   |   |   |   |   |   |   |   |   |   |   |   |   |   |   |   |   |   |   |   |   |   |   |   |   |   |   |   |   |   |   |   |   |   |   |   |   |   |   |   |   |   |   |   |   |   |   |   |   |   |   |   |   |   |   |   |   |   |   |   |   |   |   |   |   |   |   |   |   |   |   |   |   |   |   |   |   |   |   |   |   |   |   |   |   |   |   |   |   |   |   |   |   |   |   |   |   |   |   |   |   |   |   |   |   |   |   |   |   |   |   |   |   |   |   |   |   |   |   |   |   |   |   |   |   |   |   |   |   |   |   |   |   |   |   |   |   |   |   |   |   |   |   |   |   |   |   |   |   |   |   |   |   |   |   |   |   |   |   |   |   |   |   |   |   |   |   |   |   |   |   |   |   |   |   |   |   |   |   |   |   |   |   |   |   |   |   |   |   |   |   |   |   |   |   |   |   |   |   |   |   |   |   |   |   |   |   |   |   |   |   |   |   |   |   |   |   |   |   |   |   |   |   |   |   |   |   |   |   |   |   |   |   |   |   |   |   |   |   |   |   |   |   |   |   |   |   |   |   |   |   |   |   |   |   |   |   |   |   |   |   |   |   |   |   |   |   |   |   |   |   |   |   |   |   |   |   |   |   |   |   |   |   |   |   |   |   |   |   |   |   |   |   |   |   |   |   |   |   |   |   |   |   |   |   |   |   |   |   |   |   |   |   |   |   |   |   |   |   |   |   |   |   |   |   |   |   |   |   |   |   |   |   |   |   |   |   |   |   |   |   |   |   |   |   |   |   |   |   |   |   |   |   |   |   |   |   |   |   |   |   |   |   |   |   |   |   |   |   |   |   |   |   |   |   |   |   |   |   |   |   |   |   |   |   |   |   |   |   |   |   |   |   |   |   |   |   |   |   |   |   |   |   |   |   |   |   |   |   |   |   |   |   |   |   |   |   |   |   |   |   |   |   |   |   |   |   |   |   |   |   |   |   |   |   |   |   |   |   |   |   |   |   |   |   |   |   |   |   |   |   |   |   |   |   |   |   |   |   |   |   |   |   |   |   |   |   |   |   |   |   |   |   |   |   |   |   |   |   |   |   |   |   |   |   |   |   |   |   |   |   |   |   |   |   |   |   |   |   |   |   |   |   |   |   |   |   |   |   |   |   |   |   |   |   |   |   |   |   |   |   |   |   |   |   |   |   |   |   |   |   |   |   |   |   |   |   |   |   |   |   |   |   |   |   |   |   |   |   |   |   |   |   |   |   |   |   |   |   |   |   |   |   |   |   |   |   |   |   |   |   |   |   |   |   |   |   |   |   |   |   |   |   |   |   |   |   |   |   |   |   |   |   |   |   |   |   |   |   |   |   |   |   |   |   |   |   |   |   |   |   |   |   |   |   |   |   |   |   |   |   |   |   |   |   |   |   |   |   |   |   |   |   |   |   |   |   |   |   |   |   |   |   |   |   |   |   |   |   |   |   |   |   |   |   |   |   |   |   |   |   |   |   |   |   |   |   |   |   |   |   |   |   |   |   |   |   |   |   |   |   |   |   |   |   |   |   |   |   |   |   |   |   |   |   |   |   |   |   |   |   |   |   |   |   |   |   |   |   |   |   |   |   |   |   |   |   |   |   |   |   |   |   |   |   |   |   |   |   |   |   |   |   |   |   |   |   |   |   |   |   |   |   |   |   |   |   |   |   |   |   |   |   |   |   |   |   |   |   |   |   |   |   |   |   |   |   |   |   |   |   |   |   |   |   |   |   |   |   |   |   |   |   |   |   |   |   |   |   |   |   |   |   |   |   |   |   |   |   |   |   |   |   |   |   |   |   |
|                               |         |                                                             |  |  |  |  |  |  |  |  |  | Section 212 |       |       |       |       |       |       |       |       |       |     |      |      |     |    |    |    |     |    |     |     |    |     |     |    |    |     |      |   |   |   |   |   |   |   |   |   |   |   |   |   |   |   |   |   |   |   |   |   |   |   |   |   |   |   |   |   |   |   |   |   |   |   |   |   |   |   |   |   |   |   |   |   |   |   |   |   |   |   |   |   |   |   |   |   |   |   |   |   |   |   |   |   |   |   |   |   |   |   |   |   |   |   |   |   |   |   |   |   |   |   |   |   |   |   |   |   |   |   |   |   |   |   |   |   |   |   |   |   |   |   |   |   |   |   |   |   |   |   |   |   |   |   |   |   |   |   |   |   |   |   |   |   |   |   |   |   |   |   |   |   |   |   |   |   |   |   |   |   |   |   |   |   |   |   |   |   |   |   |   |   |   |   |   |   |   |   |   |   |   |   |   |   |   |   |   |   |   |   |   |   |   |   |   |   |   |   |   |   |   |   |   |   |   |   |   |   |   |   |   |   |   |   |   |   |   |   |   |   |   |   |   |   |   |   |   |   |   |   |   |   |   |   |   |   |   |   |   |   |   |   |   |   |   |   |   |   |   |   |   |   |   |   |   |   |   |   |   |   |   |   |   |   |   |   |   |   |   |   |   |   |   |   |   |   |   |   |   |   |   |   |   |   |   |   |   |   |   |   |   |   |   |   |   |   |   |   |   |   |   |   |   |   |   |   |   |   |   |   |   |   |   |   |   |   |   |   |   |   |   |   |   |   |   |   |   |   |   |   |   |   |   |   |   |   |   |   |   |   |   |   |   |   |   |   |   |   |   |   |   |   |   |   |   |   |   |   |   |   |   |   |   |   |   |   |   |   |   |   |   |   |   |   |   |   |   |   |   |   |   |   |   |   |   |   |   |   |   |   |   |   |   |   |   |   |   |   |   |   |   |   |   |   |   |   |   |   |   |   |   |   |   |   |   |   |   |   |   |   |   |   |   |   |   |   |   |   |   |   |   |   |   |   |   |   |   |   |   |   |   |   |   |   |   |   |   |   |   |   |   |   |   |   |   |   |   |   |   |   |   |   |   |   |   |   |   |   |   |   |   |   |   |   |   |   |   |   |   |   |   |   |   |   |   |   |   |   |   |   |   |   |   |   |   |   |   |   |   |   |   |   |   |   |   |   |   |   |   |   |   |   |   |   |   |   |   |   |   |   |   |   |   |   |   |   |   |   |   |   |   |   |   |   |   |   |   |   |   |   |   |   |   |   |   |   |   |   |   |   |   |   |   |   |   |   |   |   |   |   |   |   |   |   |   |   |   |   |   |   |   |   |   |   |   |   |   |   |   |   |   |   |   |   |   |   |   |   |   |   |   |   |   |   |   |   |   |   |   |   |   |   |   |   |   |   |   |   |   |   |   |   |   |   |   |   |   |   |   |   |   |   |   |   |   |   |   |   |   |   |   |   |   |   |   |   |   |   |   |   |   |   |   |   |   |   |   |   |   |   |   |   |   |   |   |   |   |   |   |   |   |   |   |   |   |   |   |   |   |   |   |   |   |   |   |   |   |   |   |   |   |   |   |   |   |   |   |   |   |   |   |   |   |   |   |   |   |   |   |   |   |   |   |   |   |   |   |   |   |   |   |   |   |   |   |   |   |   |   |   |   |   |   |   |   |   |   |   |   |   |   |   |   |   |   |   |   |   |   |   |   |   |   |   |   |   |   |   |   |   |   |   |   |   |   |   |   |   |   |   |   |   |   |   |   |   |   |   |   |   |   |   |   |   |   |   |   |   |   |   |   |   |   |   |   |   |   |   |   |   |   |   |   |   |   |   |   |   |   |   |   |   |   |   |   |   |   |   |   |   |   |   |   |   |   |   |   |   |   |   |   |   |   |   |   |   |   |   |   |   |   |   |   |   |   |   |   |   |   |   |   |   |   |   |   |   |   |   |   |   |   |   |   |   |   |   |   |   |   |   |   |   |   |   |   |   |   |   |   |   |   |   |   |   |   |   |   |   |   |   |   |   |   |   |   |   |   |   |   |   |   |   |   |   |   |   |   |   |   |   |   |   |   |   |   |   |   |   |   |   |   |   |   |   |   |   |   |   |   |   |   |   |   |   |
|                               |         |                                                             |  |  |  |  |  |  |  |  |  | 19835       | 19840 | 19850 | 19860 | 19870 | 19880 | 19890 | 19900 | 19910 | 19928 |     |      |      |     |    |    |    |     |    |     |     |    |     |     |    |    |     |      |   |   |   |   |   |   |   |   |   |   |   |   |   |   |   |   |   |   |   |   |   |   |   |   |   |   |   |   |   |   |   |   |   |   |   |   |   |   |   |   |   |   |   |   |   |   |   |   |   |   |   |   |   |   |   |   |   |   |   |   |   |   |   |   |   |   |   |   |   |   |   |   |   |   |   |   |   |   |   |   |   |   |   |   |   |   |   |   |   |   |   |   |   |   |   |   |   |   |   |   |   |   |   |   |   |   |   |   |   |   |   |   |   |   |   |   |   |   |   |   |   |   |   |   |   |   |   |   |   |   |   |   |   |   |   |   |   |   |   |   |   |   |   |   |   |   |   |   |   |   |   |   |   |   |   |   |   |   |   |   |   |   |   |   |   |   |   |   |   |   |   |   |   |   |   |   |   |   |   |   |   |   |   |   |   |   |   |   |   |   |   |   |   |   |   |   |   |   |   |   |   |   |   |   |   |   |   |   |   |   |   |   |   |   |   |   |   |   |   |   |   |   |   |   |   |   |   |   |   |   |   |   |   |   |   |   |   |   |   |   |   |   |   |   |   |   |   |   |   |   |   |   |   |   |   |   |   |   |   |   |   |   |   |   |   |   |   |   |   |   |   |   |   |   |   |   |   |   |   |   |   |   |   |   |   |   |   |   |   |   |   |   |   |   |   |   |   |   |   |   |   |   |   |   |   |   |   |   |   |   |   |   |   |   |   |   |   |   |   |   |   |   |   |   |   |   |   |   |   |   |   |   |   |   |   |   |   |   |   |   |   |   |   |   |   |   |   |   |   |   |   |   |   |   |   |   |   |   |   |   |   |   |   |   |   |   |   |   |   |   |   |   |   |   |   |   |   |   |   |   |   |   |   |   |   |   |   |   |   |   |   |   |   |   |   |   |   |   |   |   |   |   |   |   |   |   |   |   |   |   |   |   |   |   |   |   |   |   |   |   |   |   |   |   |   |   |   |   |   |   |   |   |   |   |   |   |   |   |   |   |   |   |   |   |   |   |   |   |   |   |   |   |   |   |   |   |   |   |   |   |   |   |   |   |   |   |   |   |   |   |   |   |   |   |   |   |   |   |   |   |   |   |   |   |   |   |   |   |   |   |   |   |   |   |   |   |   |   |   |   |   |   |   |   |   |   |   |   |   |   |   |   |   |   |   |   |   |   |   |   |   |   |   |   |   |   |   |   |   |   |   |   |   |   |   |   |   |   |   |   |   |   |   |   |   |   |   |   |   |   |   |   |   |   |   |   |   |   |   |   |   |   |   |   |   |   |   |   |   |   |   |   |   |   |   |   |   |   |   |   |   |   |   |   |   |   |   |   |   |   |   |   |   |   |   |   |   |   |   |   |   |   |   |   |   |   |   |   |   |   |   |   |   |   |   |   |   |   |   |   |   |   |   |   |   |   |   |   |   |   |   |   |   |   |   |   |   |   |   |   |   |   |   |   |   |   |   |   |   |   |   |   |   |   |   |   |   |   |   |   |   |   |   |   |   |   |   |   |   |   |   |   |   |   |   |   |   |   |   |   |   |   |   |   |   |   |   |   |   |   |   |   |   |   |   |   |   |   |   |   |   |   |   |   |   |   |   |   |   |   |   |   |   |   |   |   |   |   |   |   |   |   |   |   |   |   |   |   |   |   |   |   |   |   |   |   |   |   |   |   |   |   |   |   |   |   |   |   |   |   |   |   |   |   |   |   |   |   |   |   |   |   |   |   |   |   |   |   |   |   |   |   |   |   |   |   |   |   |   |   |   |   |   |   |   |   |   |   |   |   |   |   |   |   |   |   |   |   |   |   |   |   |   |   |   |   |   |   |   |   |   |   |   |   |   |   |   |   |   |   |   |   |   |   |   |   |   |   |   |   |   |   |   |   |   |   |   |   |   |   |   |   |   |   |   |   |   |   |   |   |   |   |   |   |   |   |   |   |   |   |   |   |   |   |   |   |   |   |   |   |   |   |   |   |   |   |   |   |   |   |   |   |   |   |   |   |   |   |   |   |   |   |   |   |   |   |   |   |   |   |   |   |   |   |   |
| Hepatitis B virus NC_003977.2 | (1743)  | TGGGGGA--GGAGATTAGGTTAAAGGTC                                |  |  |  |  |  |  |  |  |  |             | TTTT  | GT    | A---- | CTAG  | GA    | GG    | CT    | G     | TAG   | G   | CA   | TAA  | AT  | TG | GT | CT | TG  | CG | C   | ACC | AG | C   | ACC | AT | GC | AA  | CTTT | T | T | T | C | A | C |   |   |   |   |   |   |   |   |   |   |   |   |   |   |   |   |   |   |   |   |   |   |   |   |   |   |   |   |   |   |   |   |   |   |   |   |   |   |   |   |   |   |   |   |   |   |   |   |   |   |   |   |   |   |   |   |   |   |   |   |   |   |   |   |   |   |   |   |   |   |   |   |   |   |   |   |   |   |   |   |   |   |   |   |   |   |   |   |   |   |   |   |   |   |   |   |   |   |   |   |   |   |   |   |   |   |   |   |   |   |   |   |   |   |   |   |   |   |   |   |   |   |   |   |   |   |   |   |   |   |   |   |   |   |   |   |   |   |   |   |   |   |   |   |   |   |   |   |   |   |   |   |   |   |   |   |   |   |   |   |   |   |   |   |   |   |   |   |   |   |   |   |   |   |   |   |   |   |   |   |   |   |   |   |   |   |   |   |   |   |   |   |   |   |   |   |   |   |   |   |   |   |   |   |   |   |   |   |   |   |   |   |   |   |   |   |   |   |   |   |   |   |   |   |   |   |   |   |   |   |   |   |   |   |   |   |   |   |   |   |   |   |   |   |   |   |   |   |   |   |   |   |   |   |   |   |   |   |   |   |   |   |   |   |   |   |   |   |   |   |   |   |   |   |   |   |   |   |   |   |   |   |   |   |   |   |   |   |   |   |   |   |   |   |   |   |   |   |   |   |   |   |   |   |   |   |   |   |   |   |   |   |   |   |   |   |   |   |   |   |   |   |   |   |   |   |   |   |   |   |   |   |   |   |   |   |   |   |   |   |   |   |   |   |   |   |   |   |   |   |   |   |   |   |   |   |   |   |   |   |   |   |   |   |   |   |   |   |   |   |   |   |   |   |   |   |   |   |   |   |   |   |   |   |   |   |   |   |   |   |   |   |   |   |   |   |   |   |   |   |   |   |   |   |   |   |   |   |   |   |   |   |   |   |   |   |   |   |   |   |   |   |   |   |   |   |   |   |   |   |   |   |   |   |   |   |   |   |   |   |   |   |   |   |   |   |   |   |   |   |   |   |   |   |   |   |   |   |   |   |   |   |   |   |   |   |   |   |   |   |   |   |   |   |   |   |   |   |   |   |   |   |   |   |   |   |   |   |   |   |   |   |   |   |   |   |   |   |   |   |   |   |   |   |   |   |   |   |   |   |   |   |   |   |   |   |   |   |   |   |   |   |   |   |   |   |   |   |   |   |   |   |   |   |   |   |   |   |   |   |   |   |   |   |   |   |   |   |   |   |   |   |   |   |   |   |   |   |   |   |   |   |   |   |   |   |   |   |   |   |   |   |   |   |   |   |   |   |   |   |   |   |   |   |   |   |   |   |   |   |   |   |   |   |   |   |   |   |   |   |   |   |   |   |   |   |   |   |   |   |   |   |   |   |   |   |   |   |   |   |   |   |   |   |   |   |   |   |   |   |   |   |   |   |   |   |   |   |   |   |   |   |   |   |   |   |   |   |   |   |   |   |   |   |   |   |   |   |   |   |   |   |   |   |   |   |   |   |   |   |   |   |   |   |   |   |   |   |   |   |   |   |   |   |   |   |   |   |   |   |   |   |   |   |   |   |   |   |   |   |   |   |   |   |   |   |   |   |   |   |   |   |   |   |   |   |   |   |   |   |   |   |   |   |   |   |   |   |   |   |   |   |   |   |   |   |   |   |   |   |   |   |   |   |   |   |   |   |   |   |   |   |   |   |   |   |   |   |   |   |   |   |   |   |   |   |   |   |   |   |   |   |   |   |   |   |   |   |   |   |   |   |   |   |   |   |   |   |   |   |   |   |   |   |   |   |   |   |   |   |   |   |   |   |   |   |   |   |   |   |   |   |   |   |   |   |   |   |   |   |   |   |   |   |   |   |   |   |   |   |   |   |   |   |   |   |   |   |   |   |   |   |   |   |   |   |   |   |   |   |   |   |   |   |   |   |   |   |   |   |   |   |   |   |   |   |   |   |   |   |   |   |   |   |   |   |   |   |   |   |   |   |   |   |   |   |   |   |   |   |   |   |   |   |   |   |   |   |   |
| SARS-CoV-2 NC_045512.2        | (19686) | ACCA                                                        |  |  |  |  |  |  |  |  |  |             | G     | TT    | T     | C     | T     | A     | T     | C     | A     | T   | T    | A    | A   | G  | T  | T  | G   | A  | T   | T   | G  | T   | T   | G  | A  | A   | A    | A | C | A | C | A | T | T | A | C | T | T | G | T | T | A | A |   |   |   |   |   |   |   |   |   |   |   |   |   |   |   |   |   |   |   |   |   |   |   |   |   |   |   |   |   |   |   |   |   |   |   |   |   |   |   |   |   |   |   |   |   |   |   |   |   |   |   |   |   |   |   |   |   |   |   |   |   |   |   |   |   |   |   |   |   |   |   |   |   |   |   |   |   |   |   |   |   |   |   |   |   |   |   |   |   |   |   |   |   |   |   |   |   |   |   |   |   |   |   |   |   |   |   |   |   |   |   |   |   |   |   |   |   |   |   |   |   |   |   |   |   |   |   |   |   |   |   |   |   |   |   |   |   |   |   |   |   |   |   |   |   |   |   |   |   |   |   |   |   |   |   |   |   |   |   |   |   |   |   |   |   |   |   |   |   |   |   |   |   |   |   |   |   |   |   |   |   |   |   |   |   |   |   |   |   |   |   |   |   |   |   |   |   |   |   |   |   |   |   |   |   |   |   |   |   |   |   |   |   |   |   |   |   |   |   |   |   |   |   |   |   |   |   |   |   |   |   |   |   |   |   |   |   |   |   |   |   |   |   |   |   |   |   |   |   |   |   |   |   |   |   |   |   |   |   |   |   |   |   |   |   |   |   |   |   |   |   |   |   |   |   |   |   |   |   |   |   |   |   |   |   |   |   |   |   |   |   |   |   |   |   |   |   |   |   |   |   |   |   |   |   |   |   |   |   |   |   |   |   |   |   |   |   |   |   |   |   |   |   |   |   |   |   |   |   |   |   |   |   |   |   |   |   |   |   |   |   |   |   |   |   |   |   |   |   |   |   |   |   |   |   |   |   |   |   |   |   |   |   |   |   |   |   |   |   |   |   |   |   |   |   |   |   |   |   |   |   |   |   |   |   |   |   |   |   |   |   |   |   |   |   |   |   |   |   |   |   |   |   |   |   |   |   |   |   |   |   |   |   |   |   |   |   |   |   |   |   |   |   |   |   |   |   |   |   |   |   |   |   |   |   |   |   |   |   |   |   |   |   |   |   |   |   |   |   |   |   |   |   |   |   |   |   |   |   |   |   |   |   |   |   |   |   |   |   |   |   |   |   |   |   |   |   |   |   |   |   |   |   |   |   |   |   |   |   |   |   |   |   |   |   |   |   |   |   |   |   |   |   |   |   |   |   |   |   |   |   |   |   |   |   |   |   |   |   |   |   |   |   |   |   |   |   |   |   |   |   |   |   |   |   |   |   |   |   |   |   |   |   |   |   |   |   |   |   |   |   |   |   |   |   |   |   |   |   |   |   |   |   |   |   |   |   |   |   |   |   |   |   |   |   |   |   |   |   |   |   |   |   |   |   |   |   |   |   |   |   |   |   |   |   |   |   |   |   |   |   |   |   |   |   |   |   |   |   |   |   |   |   |   |   |   |   |   |   |   |   |   |   |   |   |   |   |   |   |   |   |   |   |   |   |   |   |   |   |   |   |   |   |   |   |   |   |   |   |   |   |   |   |   |   |   |   |   |   |   |   |   |   |   |   |   |   |   |   |   |   |   |   |   |   |   |   |   |   |   |   |   |   |   |   |   |   |   |   |   |   |   |   |   |   |   |   |   |   |   |   |   |   |   |   |   |   |   |   |   |   |   |   |   |   |   |   |   |   |   |   |   |   |   |   |   |   |   |   |   |   |   |   |   |   |   |   |   |   |   |   |   |   |   |   |   |   |   |   |   |   |   |   |   |   |   |   |   |   |   |   |   |   |   |   |   |   |   |   |   |   |   |   |   |   |   |   |   |   |   |   |   |   |   |   |   |   |   |   |   |   |   |   |   |   |   |   |   |   |   |   |   |   |   |   |   |   |   |   |   |   |   |   |   |   |   |   |   |   |   |   |   |   |   |   |   |   |   |   |   |   |   |   |   |   |   |   |   |   |   |   |   |   |   |   |   |   |   |   |   |   |   |   |   |   |   |   |   |   |   |   |   |   |   |   |   |   |   |   |   |   |   |   |   |   |   |   |   |   |   |   |   |   |   |   |   |   |   |   |
|                               |         |                                                             |  |  |  |  |  |  |  |  |  | Section 213 |       |       |       |       |       |       |       |       |       |     |      |      |     |    |    |    |     |    |     |     |    |     |     |    |    |     |      |   |   |   |   |   |   |   |   |   |   |   |   |   |   |   |   |   |   |   |   |   |   |   |   |   |   |   |   |   |   |   |   |   |   |   |   |   |   |   |   |   |   |   |   |   |   |   |   |   |   |   |   |   |   |   |   |   |   |   |   |   |   |   |   |   |   |   |   |   |   |   |   |   |   |   |   |   |   |   |   |   |   |   |   |   |   |   |   |   |   |   |   |   |   |   |   |   |   |   |   |   |   |   |   |   |   |   |   |   |   |   |   |   |   |   |   |   |   |   |   |   |   |   |   |   |   |   |   |   |   |   |   |   |   |   |   |   |   |   |   |   |   |   |   |   |   |   |   |   |   |   |   |   |   |   |   |   |   |   |   |   |   |   |   |   |   |   |   |   |   |   |   |   |   |   |   |   |   |   |   |   |   |   |   |   |   |   |   |   |   |   |   |   |   |   |   |   |   |   |   |   |   |   |   |   |   |   |   |   |   |   |   |   |   |   |   |   |   |   |   |   |   |   |   |   |   |   |   |   |   |   |   |   |   |   |   |   |   |   |   |   |   |   |   |   |   |   |   |   |   |   |   |   |   |   |   |   |   |   |   |   |   |   |   |   |   |   |   |   |   |   |   |   |   |   |   |   |   |   |   |   |   |   |   |   |   |   |   |   |   |   |   |   |   |   |   |   |   |   |   |   |   |   |   |   |   |   |   |   |   |   |   |   |   |   |   |   |   |   |   |   |   |   |   |   |   |   |   |   |   |   |   |   |   |   |   |   |   |   |   |   |   |   |   |   |   |   |   |   |   |   |   |   |   |   |   |   |   |   |   |   |   |   |   |   |   |   |   |   |   |   |   |   |   |   |   |   |   |   |   |   |   |   |   |   |   |   |   |   |   |   |   |   |   |   |   |   |   |   |   |   |   |   |   |   |   |   |   |   |   |   |   |   |   |   |   |   |   |   |   |   |   |   |   |   |   |   |   |   |   |   |   |   |   |   |   |   |   |   |   |   |   |   |   |   |   |   |   |   |   |   |   |   |   |   |   |   |   |   |   |   |   |   |   |   |   |   |   |   |   |   |   |   |   |   |   |   |   |   |   |   |   |   |   |   |   |   |   |   |   |   |   |   |   |   |   |   |   |   |   |   |   |   |   |   |   |   |   |   |   |   |   |   |   |   |   |   |   |   |   |   |   |   |   |   |   |   |   |   |   |   |   |   |   |   |   |   |   |   |   |   |   |   |   |   |   |   |   |   |   |   |   |   |   |   |   |   |   |   |   |   |   |   |   |   |   |   |   |   |   |   |   |   |   |   |   |   |   |   |   |   |   |   |   |   |   |   |   |   |   |   |   |   |   |   |   |   |   |   |   |   |   |   |   |   |   |   |   |   |   |   |   |   |   |   |   |   |   |   |   |   |   |   |   |   |   |   |   |   |   |   |   |   |   |   |   |   |   |   |   |   |   |   |   |   |   |   |   |   |   |   |   |   |   |   |   |   |   |   |   |   |   |   |   |   |   |   |   |   |   |   |   |   |   |   |   |   |   |   |   |   |   |   |   |   |   |   |   |   |   |   |   |   |   |   |   |   |   |   |   |   |   |   |   |   |   |   |   |   |   |   |   |   |   |   |   |   |   |   |   |   |   |   |   |   |   |   |   |   |   |   |   |   |   |   |   |   |   |   |   |   |   |   |   |   |   |   |   |   |   |   |   |   |   |   |   |   |   |   |   |   |   |   |   |   |   |   |   |   |   |   |   |   |   |   |   |   |   |   |   |   |   |   |   |   |   |   |   |   |   |   |   |   |   |   |   |   |   |   |   |   |   |   |   |   |   |   |   |   |   |   |   |   |   |   |   |   |   |   |   |   |   |   |   |   |   |   |   |   |   |   |   |   |   |   |   |   |   |   |   |   |   |   |   |   |   |   |   |   |   |   |   |   |   |   |   |   |   |   |   |   |   |   |   |   |   |   |   |   |   |   |   |   |   |   |   |   |   |   |   |   |   |   |   |   |   |   |   |   |   |   |   |   |   |   |   |   |   |   |   |   |   |   |   |   |
|                               |         |                                                             |  |  |  |  |  |  |  |  |  | 19929       | 19940 | 19950 | 19960 | 19970 | 19980 | 19990 | 20000 | 20010 | 20022 |     |      |      |     |    |    |    |     |    |     |     |    |     |     |    |    |     |      |   |   |   |   |   |   |   |   |   |   |   |   |   |   |   |   |   |   |   |   |   |   |   |   |   |   |   |   |   |   |   |   |   |   |   |   |   |   |   |   |   |   |   |   |   |   |   |   |   |   |   |   |   |   |   |   |   |   |   |   |   |   |   |   |   |   |   |   |   |   |   |   |   |   |   |   |   |   |   |   |   |   |   |   |   |   |   |   |   |   |   |   |   |   |   |   |   |   |   |   |   |   |   |   |   |   |   |   |   |   |   |   |   |   |   |   |   |   |   |   |   |   |   |   |   |   |   |   |   |   |   |   |   |   |   |   |   |   |   |   |   |   |   |   |   |   |   |   |   |   |   |   |   |   |   |   |   |   |   |   |   |   |   |   |   |   |   |   |   |   |   |   |   |   |   |   |   |   |   |   |   |   |   |   |   |   |   |   |   |   |   |   |   |   |   |   |   |   |   |   |   |   |   |   |   |   |   |   |   |   |   |   |   |   |   |   |   |   |   |   |   |   |   |   |   |   |   |   |   |   |   |   |   |   |   |   |   |   |   |   |   |   |   |   |   |   |   |   |   |   |   |   |   |   |   |   |   |   |   |   |   |   |   |   |   |   |   |   |   |   |   |   |   |   |   |   |   |   |   |   |   |   |   |   |   |   |   |   |   |   |   |   |   |   |   |   |   |   |   |   |   |   |   |   |   |   |   |   |   |   |   |   |   |   |   |   |   |   |   |   |   |   |   |   |   |   |   |   |   |   |   |   |   |   |   |   |   |   |   |   |   |   |   |   |   |   |   |   |   |   |   |   |   |   |   |   |   |   |   |   |   |   |   |   |   |   |   |   |   |   |   |   |   |   |   |   |   |   |   |   |   |   |   |   |   |   |   |   |   |   |   |   |   |   |   |   |   |   |   |   |   |   |   |   |   |   |   |   |   |   |   |   |   |   |   |   |   |   |   |   |   |   |   |   |   |   |   |   |   |   |   |   |   |   |   |   |   |   |   |   |   |   |   |   |   |   |   |   |   |   |   |   |   |   |   |   |   |   |   |   |   |   |   |   |   |   |   |   |   |   |   |   |   |   |   |   |   |   |   |   |   |   |   |   |   |   |   |   |   |   |   |   |   |   |   |   |   |   |   |   |   |   |   |   |   |   |   |   |   |   |   |   |   |   |   |   |   |   |   |   |   |   |   |   |   |   |   |   |   |   |   |   |   |   |   |   |   |   |   |   |   |   |   |   |   |   |   |   |   |   |   |   |   |   |   |   |   |   |   |   |   |   |   |   |   |   |   |   |   |   |   |   |   |   |   |   |   |   |   |   |   |   |   |   |   |   |   |   |   |   |   |   |   |   |   |   |   |   |   |   |   |   |   |   |   |   |   |   |   |   |   |   |   |   |   |   |   |   |   |   |   |   |   |   |   |   |   |   |   |   |   |   |   |   |   |   |   |   |   |   |   |   |   |   |   |   |   |   |   |   |   |   |   |   |   |   |   |   |   |   |   |   |   |   |   |   |   |   |   |   |   |   |   |   |   |   |   |   |   |   |   |   |   |   |   |   |   |   |   |   |   |   |   |   |   |   |   |   |   |   |   |   |   |   |   |   |   |   |   |   |   |   |   |   |   |   |   |   |   |   |   |   |   |   |   |   |   |   |   |   |   |   |   |   |   |   |   |   |   |   |   |   |   |   |   |   |   |   |   |   |   |   |   |   |   |   |   |   |   |   |   |   |   |   |   |   |   |   |   |   |   |   |   |   |   |   |   |   |   |   |   |   |   |   |   |   |   |   |   |   |   |   |   |   |   |   |   |   |   |   |   |   |   |   |   |   |   |   |   |   |   |   |   |   |   |   |   |   |   |   |   |   |   |   |   |   |   |   |   |   |   |   |   |   |   |   |   |   |   |   |   |   |   |   |   |   |   |   |   |   |   |   |   |   |   |   |   |   |   |   |   |   |   |   |   |   |   |   |   |   |   |   |   |   |   |   |   |   |   |   |   |   |   |   |   |   |   |   |   |   |   |   |   |   |   |   |   |   |   |   |   |   |   |   |   |
| Hepatitis B virus NC_003977.2 | (1831)  | CTCTGCCTAATCATCTCTTGTTCATGTCC-T                             |  |  |  |  |  |  |  |  |  |             | ACT   | G     | T     | T     | ---   | CA    | AG    | C     | T     | CC  | A    | AG   | --- | CT | G  | T  | G   | C  | T   | T   | G  | G   | G   | T  | G  | G   | C    | T | T | T | G | G | G | C | A | T | G | C | A | C | C | C | T |   |   |   |   |   |   |   |   |   |   |   |   |   |   |   |   |   |   |   |   |   |   |   |   |   |   |   |   |   |   |   |   |   |   |   |   |   |   |   |   |   |   |   |   |   |   |   |   |   |   |   |   |   |   |   |   |   |   |   |   |   |   |   |   |   |   |   |   |   |   |   |   |   |   |   |   |   |   |   |   |   |   |   |   |   |   |   |   |   |   |   |   |   |   |   |   |   |   |   |   |   |   |   |   |   |   |   |   |   |   |   |   |   |   |   |   |   |   |   |   |   |   |   |   |   |   |   |   |   |   |   |   |   |   |   |   |   |   |   |   |   |   |   |   |   |   |   |   |   |   |   |   |   |   |   |   |   |   |   |   |   |   |   |   |   |   |   |   |   |   |   |   |   |   |   |   |   |   |   |   |   |   |   |   |   |   |   |   |   |   |   |   |   |   |   |   |   |   |   |   |   |   |   |   |   |   |   |   |   |   |   |   |   |   |   |   |   |   |   |   |   |   |   |   |   |   |   |   |   |   |   |   |   |   |   |   |   |   |   |   |   |   |   |   |   |   |   |   |   |   |   |   |   |   |   |   |   |   |   |   |   |   |   |   |   |   |   |   |   |   |   |   |   |   |   |   |   |   |   |   |   |   |   |   |   |   |   |   |   |   |   |   |   |   |   |   |   |   |   |   |   |   |   |   |   |   |   |   |   |   |   |   |   |   |   |   |   |   |   |   |   |   |   |   |   |   |   |   |   |   |   |   |   |   |   |   |   |   |   |   |   |   |   |   |   |   |   |   |   |   |   |   |   |   |   |   |   |   |   |   |   |   |   |   |   |   |   |   |   |   |   |   |   |   |   |   |   |   |   |   |   |   |   |   |   |   |   |   |   |   |   |   |   |   |   |   |   |   |   |   |   |   |   |   |   |   |   |   |   |   |   |   |   |   |   |   |   |   |   |   |   |   |   |   |   |   |   |   |   |   |   |   |   |   |   |   |   |   |   |   |   |   |   |   |   |   |   |   |   |   |   |   |   |   |   |   |   |   |   |   |   |   |   |   |   |   |   |   |   |   |   |   |   |   |   |   |   |   |   |   |   |   |   |   |   |   |   |   |   |   |   |   |   |   |   |   |   |   |   |   |   |   |   |   |   |   |   |   |   |   |   |   |   |   |   |   |   |   |   |   |   |   |   |   |   |   |   |   |   |   |   |   |   |   |   |   |   |   |   |   |   |   |   |   |   |   |   |   |   |   |   |   |   |   |   |   |   |   |   |   |   |   |   |   |   |   |   |   |   |   |   |   |   |   |   |   |   |   |   |   |   |   |   |   |   |   |   |   |   |   |   |   |   |   |   |   |   |   |   |   |   |   |   |   |   |   |   |   |   |   |   |   |   |   |   |   |   |   |   |   |   |   |   |   |   |   |   |   |   |   |   |   |   |   |   |   |   |   |   |   |   |   |   |   |   |   |   |   |   |   |   |   |   |   |   |   |   |   |   |   |   |   |   |   |   |   |   |   |   |   |   |   |   |   |   |   |   |   |   |   |   |   |   |   |   |   |   |   |   |   |   |   |   |   |   |   |   |   |   |   |   |   |   |   |   |   |   |   |   |   |   |   |   |   |   |   |   |   |   |   |   |   |   |   |   |   |   |   |   |   |   |   |   |   |   |   |   |   |   |   |   |   |   |   |   |   |   |   |   |   |   |   |   |   |   |   |   |   |   |   |   |   |   |   |   |   |   |   |   |   |   |   |   |   |   |   |   |   |   |   |   |   |   |   |   |   |   |   |   |   |   |   |   |   |   |   |   |   |   |   |   |   |   |   |   |   |   |   |   |   |   |   |   |   |   |   |   |   |   |   |   |   |   |   |   |   |   |   |   |   |   |   |   |   |   |   |   |   |   |   |   |   |   |   |   |   |   |   |   |   |   |   |   |   |   |   |   |   |   |   |   |   |   |   |   |   |   |   |   |   |   |   |   |   |   |   |   |   |   |   |   |   |   |   |   |   |   |   |   |
| SARS-CoV-2 NC_045512.2        | (19776) | TGTA                                                        |  |  |  |  |  |  |  |  |  |             | G     | --    | C     | A     | T     | T     | G     | A     | G     | C   | T    | T    | G   | G  | G  | C  | T   | A  | A   | G   | C  | T   | A   | A  | G  | C   | T    | A | A | G | C | T | A | A | G | C | T | A | A | G | C | T | A | A | G | C | T | A | A | G | C | T | A | A | G | C | T | A | A | G | C | T | A | A | G | C | T | A | A | G | C | T | A | A | G | C | T | A | A | G | C | T | A | A | G | C | T | A | A | G | C | T | A | A | G | C | T | A | A | G | C | T | A | A | G | C | T | A | A | G | C | T | A | A | G | C | T | A | A | G | C | T | A | A | G | C | T | A | A | G | C | T | A | A | G | C | T | A | A | G | C | T | A | A | G | C | T | A | A | G | C | T | A | A | G | C | T | A | A | G | C | T | A | A | G | C | T | A | A | G | C | T | A | A | G | C | T | A | A | G | C | T | A | A | G | C | T | A | A | G | C | T | A | A | G | C | T | A | A | G | C | T | A | A | G | C | T | A | A | G | C | T | A | A | G | C | T | A | A | G | C | T | A | A | G | C | T | A | A | G | C | T | A | A | G | C | T | A | A | G | C | T | A | A | G | C | T | A | A | G | C | T | A | A | G | C | T | A | A | G | C | T | A | A | G | C | T | A | A | G | C | T | A | A | G | C | T | A | A | G | C | T | A | A | G | C | T | A | A | G | C | T | A | A | G | C | T | A | A | G | C | T | A | A | G | C | T | A | A | G | C | T | A | A | G | C | T | A | A | G | C | T | A | A | G | C | T | A | A | G | C | T | A | A | G | C | T | A | A | G | C | T | A | A | G | C | T | A | A | G | C | T | A | A | G | C | T | A | A | G | C | T | A | A | G | C | T | A | A | G | C | T | A | A | G | C | T | A | A | G | C | T | A | A | G | C | T | A | A | G | C | T | A | A | G | C | T | A | A | G | C | T | A | A | G | C | T | A | A | G | C | T | A | A | G | C | T | A | A | G | C | T | A | A | G | C | T | A | A | G | C | T | A | A | G | C | T | A | A | G | C | T | A | A | G | C | T | A | A | G | C | T | A | A | G | C | T | A | A | G | C | T | A | A | G | C | T | A | A | G | C | T | A | A | G | C | T | A | A | G | C | T | A | A | G | C | T | A | A | G | C | T | A | A | G | C | T | A | A | G | C | T | A | A | G | C | T | A | A | G | C | T | A | A | G | C | T | A | A | G | C | T | A | A | G | C | T | A | A | G | C | T | A | A | G | C | T | A | A | G | C | T | A | A | G | C | T | A | A | G | C | T | A | A | G | C | T | A | A | G | C | T | A | A | G | C | T | A | A | G | C | T | A | A | G | C | T | A | A | G | C | T | A | A | G | C | T | A | A | G | C | T | A | A | G | C | T | A | A | G | C | T | A | A | G | C | T | A | A | G | C | T | A | A | G | C | T | A | A | G | C | T | A | A | G | C | T | A | A | G | C | T | A | A | G | C | T | A | A | G | C | T | A | A | G | C | T | A | A | G | C | T | A | A | G | C | T | A | A | G | C | T | A | A | G | C | T | A | A | G | C | T | A | A | G | C | T | A | A | G | C | T | A | A | G | C | T | A | A | G | C | T | A | A | G | C | T | A | A | G | C | T | A | A | G | C | T | A | A | G | C | T | A | A | G | C | T | A | A | G | C | T | A | A | G | C | T | A | A | G | C | T | A | A | G | C | T | A | A | G | C | T | A | A | G | C | T | A | A | G | C | T | A | A | G | C | T | A | A | G | C | T | A | A | G | C | T | A | A | G | C | T | A | A | G | C | T | A | A | G | C | T | A | A | G | C | T | A | A | G | C | T | A | A | G | C | T | A | A | G | C | T | A | A | G | C | T | A | A | G | C | T | A | A | G | C | T | A | A | G | C | T | A | A | G | C | T | A | A | G | C | T | A | A | G | C | T | A | A | G | C | T | A | A | G | C | T | A | A | G | C | T | A | A | G | C | T | A | A | G | C | T | A | A | G | C | T | A | A | G | C | T | A | A | G | C | T | A | A | G | C | T | A | A | G | C | T | A | A | G | C | T | A | A | G | C | T | A | A | G | C | T | A | A | G | C | T | A | A | G | C | T | A | A | G | C | T | A | A | G | C | T | A | A | G | C | T | A | A | G | C | T |

SARS-CoV-2 & Hepatitis B.apr

|                                       |                                                                                          |       |       |       |       |       |       |       |       |             |
|---------------------------------------|------------------------------------------------------------------------------------------|-------|-------|-------|-------|-------|-------|-------|-------|-------------|
|                                       |                                                                                          |       |       |       |       |       |       |       |       | Section 218 |
|                                       |                                                                                          |       |       |       |       |       |       |       |       |             |
|                                       |                                                                                          |       |       |       |       |       |       |       |       |             |
| Hepatitis B virus NC_003977.2 (20399) | 20399                                                                                    | 20410 | 20420 | 20430 | 20440 | 20450 | 20460 | 20470 | 20480 | 20492       |
| SARS-CoV-2 NC_045512.2 (2285)         | CTCCTCCAGCTTATAGACCACCAATGCCCTATCCTATCAAC--ACTTCGGAGACTACTGTTGTTAGACGACGAGGCAGGTCCCTAGAA |       |       |       |       |       |       |       |       |             |
|                                       |                                                                                          |       |       |       |       |       |       |       |       |             |
|                                       |                                                                                          |       |       |       |       |       |       |       |       | Section 219 |
|                                       |                                                                                          |       |       |       |       |       |       |       |       |             |
| Hepatitis B virus NC_003977.2 (20493) | 20493                                                                                    | 20500 | 20510 | 20520 | 20530 | 20540 | 20550 | 20560 | 20570 | 20586       |
| SARS-CoV-2 NC_045512.2 (2376)         | AAGAACGCCCGCGCCCGCAGACGAGGTCCTAATCGCCGCGTTCGC-AGAGAGATCTCAATCTCGGGAATCTCAA               |       |       |       |       |       |       |       |       |             |
|                                       |                                                                                          |       |       |       |       |       |       |       |       |             |
|                                       |                                                                                          |       |       |       |       |       |       |       |       | Section 220 |
|                                       |                                                                                          |       |       |       |       |       |       |       |       |             |
| Hepatitis B virus NC_003977.2 (20587) | 20587                                                                                    | 20600 | 20610 | 20620 | 20630 | 20640 | 20650 | 20660 | 20670 | 20680       |
| SARS-CoV-2 NC_045512.2 (2467)         | TCATAAGGTGGGAACTTACTGGGCTTTATTCCTTCTACTGTACCTGCTTTTAAATCCTCAT                            |       |       |       |       |       |       |       |       |             |
|                                       |                                                                                          |       |       |       |       |       |       |       |       |             |
|                                       |                                                                                          |       |       |       |       |       |       |       |       | Section 221 |
|                                       |                                                                                          |       |       |       |       |       |       |       |       |             |
| Hepatitis B virus NC_003977.2 (20681) | 20681                                                                                    | 20690 | 20700 | 20710 | 20720 | 20730 | 20740 | 20750 | 20760 | 20774       |
| SARS-CoV-2 NC_045512.2 (2560)         | ACACCAAGAATTATCAAAAAT--GTGAACAATTGTAGGCCCACTCAACAGTTAATGAGAAAAGAAGATTGCAAT               |       |       |       |       |       |       |       |       |             |
|                                       |                                                                                          |       |       |       |       |       |       |       |       |             |
|                                       |                                                                                          |       |       |       |       |       |       |       |       | Section 222 |
|                                       |                                                                                          |       |       |       |       |       |       |       |       |             |
| Hepatitis B virus NC_003977.2 (20775) | 20775                                                                                    | 20780 | 20790 | 20800 | 20810 | 20820 | 20830 | 20840 | 20850 | 20868       |
| SARS-CoV-2 NC_045512.2 (2652)         | TTTATCCAAAGGTAT--CCTAAATATTACCATTTGGATTAGGGTATTAAACCTTTATTATCCAGAACATCTAGTT              |       |       |       |       |       |       |       |       |             |
|                                       |                                                                                          |       |       |       |       |       |       |       |       |             |
|                                       |                                                                                          |       |       |       |       |       |       |       |       | Section 223 |
|                                       |                                                                                          |       |       |       |       |       |       |       |       |             |
| Hepatitis B virus NC_003977.2 (20869) | 20869                                                                                    | 20880 | 20890 | 20900 | 20910 | 20920 | 20930 | 20940 | 20950 | 20962       |
| SARS-CoV-2 NC_045512.2 (2743)         | ACACTATTATCACTCTATGGAGGCGGGTATATTATATAAGAGAGAAAACAACAATAGCGCTCATTTTGTGGGT                |       |       |       |       |       |       |       |       |             |
|                                       |                                                                                          |       |       |       |       |       |       |       |       |             |
|                                       |                                                                                          |       |       |       |       |       |       |       |       | Section 224 |
|                                       |                                                                                          |       |       |       |       |       |       |       |       |             |
| Hepatitis B virus NC_003977.2 (20963) | 20963                                                                                    | 20970 | 20980 | 20990 | 21000 | 21010 | 21020 | 21030 | 21040 | 21056       |
| SARS-CoV-2 NC_045512.2 (2837)         | CAAGATCTACAGCATGGGCGCAGAACTTTCCACCAGCAATCCCTCGGGAATTCCTTTCCCGACC-ACCAGT                  |       |       |       |       |       |       |       |       |             |
|                                       |                                                                                          |       |       |       |       |       |       |       |       |             |



SARS-CoV-2 & Hepatitis B.apr

|                                      |         |                                                                                                                                                                                             |       |       |       |       |       |       |       |       |             |
|--------------------------------------|---------|---------------------------------------------------------------------------------------------------------------------------------------------------------------------------------------------|-------|-------|-------|-------|-------|-------|-------|-------|-------------|
|                                      |         |                                                                                                                                                                                             |       |       |       |       |       |       |       |       | Section 225 |
| Hepatitis B virus NC_003977.2 (2930) | (21057) | 21057                                                                                                                                                                                       | 21070 | 21080 | 21090 | 21100 | 21110 | 21120 | 21130 | 21140 | 21150       |
|                                      |         | C G C A A A T C C A G A T T G G G A C T T C A -- A T C C C A A C A A G G A C A C C T G G C C A G A C G C C A A C A A G G T A G G A G C T G G A G C A T T C G G G C T G G G T T T C A C C C  |       |       |       |       |       |       |       |       |             |
| SARS-CoV-2 NC_045512.2 (20768)       |         | C T A A A G G C - A T A A T G A T G A A T -- G T C G C -- A A - A A T A T A C T C A A C T G T G T C A A T A T T T A A A C A C A T T A A C A T T A G C T G T A C C C T A T A A T A T G A G   |       |       |       |       |       |       |       |       |             |
|                                      |         |                                                                                                                                                                                             |       |       |       |       |       |       |       |       | Section 226 |
| Hepatitis B virus NC_003977.2 (3022) | (21151) | 21151                                                                                                                                                                                       | 21160 | 21170 | 21180 | 21190 | 21200 | 21210 | 21220 | 21230 | 21244       |
|                                      |         | C A C C G C A C G G A G G C C T T T T G G G G T G G A G C C C T C A G G C T - C A G G G C A T A C T A C A A A C T T T G C C A G C A A A T C C G C C T C C T G C C T C C A C C A A T C G C C |       |       |       |       |       |       |       |       |             |
| SARS-CoV-2 NC_045512.2 (20856)       |         | A G T T A T A C A T T T T G G T G C T G - G T T C T G A T A A A G G A G T T G C A C C A G G T A C A G C T G --- T - T T T A A G A C A G T G G T T G C C T A C G --- G G T A C G C T G C T   |       |       |       |       |       |       |       |       |             |
|                                      |         |                                                                                                                                                                                             |       |       |       |       |       |       |       |       | Section 227 |
| Hepatitis B virus NC_003977.2 (3115) | (21245) | 21245                                                                                                                                                                                       | 21250 | 21260 | 21270 | 21280 | 21290 | 21300 | 21310 | 21320 | 21338       |
|                                      |         | A G T C A G G A A G G C A G C C T A C C C C G C T G T C T C C A C C T T T G A G A A A C A C T C A T C C T C A G G C C A T G C A G T G G -----                                               |       |       |       |       |       |       |       |       |             |
| SARS-CoV-2 NC_045512.2 (20943)       |         | T G T C G A T T C A G A T C T T A A T G A C T T ----- T G T C T C T G A T G C A G A T T C A A C T T T G A T T G G T G A T T G T G C A A C T G T A C A T A C A G C T A A T A A A T G G       |       |       |       |       |       |       |       |       |             |
|                                      |         |                                                                                                                                                                                             |       |       |       |       |       |       |       |       | Section 228 |
| Hepatitis B virus NC_003977.2 (3183) | (21339) | 21339                                                                                                                                                                                       | 21350 | 21360 | 21370 | 21380 | 21390 | 21400 | 21410 | 21420 | 21432       |
|                                      |         | -----                                                                                                                                                                                       |       |       |       |       |       |       |       |       |             |
| SARS-CoV-2 NC_045512.2 (21031)       |         | G A T C T C A T T A T T A G T G A T A T G T A C G A C C C T A A G A C T A A A A A T G T T A C A A A A G A A A A T G A C T C T A A A G A G G G T T T T T T C A C T T A C A T T T G T G G G T |       |       |       |       |       |       |       |       |             |
|                                      |         |                                                                                                                                                                                             |       |       |       |       |       |       |       |       | Section 229 |
| Hepatitis B virus NC_003977.2 (3183) | (21433) | 21433                                                                                                                                                                                       | 21440 | 21450 | 21460 | 21470 | 21480 | 21490 | 21500 | 21510 | 21526       |
|                                      |         | -----                                                                                                                                                                                       |       |       |       |       |       |       |       |       |             |
| SARS-CoV-2 NC_045512.2 (21125)       |         | T T A T A C A A C A A A A G C T A G C T C T T G G A G G T T C C G T G G C T A T A A A G A T A A C A G A A C A T T C T T G G A A T G C T G A T C T T T A T A A G C T C A T G G G A C A C T T |       |       |       |       |       |       |       |       |             |
|                                      |         |                                                                                                                                                                                             |       |       |       |       |       |       |       |       | Section 230 |
| Hepatitis B virus NC_003977.2 (3183) | (21527) | 21527                                                                                                                                                                                       | 21540 | 21550 | 21560 | 21570 | 21580 | 21590 | 21600 | 21610 | 21620       |
|                                      |         | -----                                                                                                                                                                                       |       |       |       |       |       |       |       |       |             |
| SARS-CoV-2 NC_045512.2 (21219)       |         | C G C A T G G T G G A C A G C C T T T G T T A C T A A T G T G A A T G C G T C A T C A T C T G A A G C A T T T T T A A T T G G A T G T A A T T A T C T T G G C A A A C C A C G C G A A C A A |       |       |       |       |       |       |       |       |             |
|                                      |         |                                                                                                                                                                                             |       |       |       |       |       |       |       |       | Section 231 |
| Hepatitis B virus NC_003977.2 (3183) | (21621) | 21621                                                                                                                                                                                       | 21630 | 21640 | 21650 | 21660 | 21670 | 21680 | 21690 | 21700 | 21714       |
|                                      |         | -----                                                                                                                                                                                       |       |       |       |       |       |       |       |       |             |
| SARS-CoV-2 NC_045512.2 (21313)       |         | A T A G A T G G T T A T G T C A T G C A T G C A A A T T A C A T A T T T T G G A G G A A T A C A A A T C C A A T T C A G T T G T C T T C C T A T T C T T T A T T T G A C A T G A G T A A A T |       |       |       |       |       |       |       |       |             |

SARS-CoV-2 & Hepatitis B.apr

|                                                         |                   |                                                                                                 |                       |                       |                       |                       |                       |                       |                       |                       |                       |
|---------------------------------------------------------|-------------------|-------------------------------------------------------------------------------------------------|-----------------------|-----------------------|-----------------------|-----------------------|-----------------------|-----------------------|-----------------------|-----------------------|-----------------------|
|                                                         |                   |                                                                                                 |                       |                       |                       |                       |                       |                       |                       |                       | Section 232           |
| Hepatitis B virus NC_003977.2<br>SARS-CoV-2 NC_045512.2 | (21715)<br>(3183) | <a href="#">21715</a>                                                                           | <a href="#">21720</a> | <a href="#">21730</a> | <a href="#">21740</a> | <a href="#">21750</a> | <a href="#">21760</a> | <a href="#">21770</a> | <a href="#">21780</a> | <a href="#">21790</a> | <a href="#">21808</a> |
|                                                         | (21407)           | TTCCCCCTTAAATTAAGGGGTACTGCTGTTATGTCTTTAAAAGAAGGTCAAATCAATGATATGATTTTATCTCTTCTTAGTAAAGGTAGACTTAT |                       |                       |                       |                       |                       |                       |                       |                       |                       |
|                                                         |                   |                                                                                                 |                       |                       |                       |                       |                       |                       |                       |                       | Section 233           |
| Hepatitis B virus NC_003977.2<br>SARS-CoV-2 NC_045512.2 | (21809)<br>(3183) | <a href="#">21809</a>                                                                           | <a href="#">21820</a> | <a href="#">21830</a> | <a href="#">21840</a> | <a href="#">21850</a> | <a href="#">21860</a> | <a href="#">21870</a> | <a href="#">21880</a> | <a href="#">21890</a> | <a href="#">21902</a> |
|                                                         | (21501)           | AATTAGAGAAAACAACAGAGTTGTTATTTCTAGTGATGTTCTTGTTAACAACATAAACGAACAATGTTTGTTTTCTTGTTTTATTGCCACTAGT  |                       |                       |                       |                       |                       |                       |                       |                       |                       |
|                                                         |                   |                                                                                                 |                       |                       |                       |                       |                       |                       |                       |                       | Section 234           |
| Hepatitis B virus NC_003977.2<br>SARS-CoV-2 NC_045512.2 | (21903)<br>(3183) | <a href="#">21903</a>                                                                           | <a href="#">21910</a> | <a href="#">21920</a> | <a href="#">21930</a> | <a href="#">21940</a> | <a href="#">21950</a> | <a href="#">21960</a> | <a href="#">21970</a> | <a href="#">21980</a> | <a href="#">21996</a> |
|                                                         | (21595)           | CTCTAGTCAGTGTGTTAATCTTACAACCAGAACTCAATTACCCCCTGCATACACTAATTCTTTTCACACGTGGTGTTTATTACCCTGACAAAGTT |                       |                       |                       |                       |                       |                       |                       |                       |                       |
|                                                         |                   |                                                                                                 |                       |                       |                       |                       |                       |                       |                       |                       | Section 235           |
| Hepatitis B virus NC_003977.2<br>SARS-CoV-2 NC_045512.2 | (21997)<br>(3183) | <a href="#">21997</a>                                                                           | <a href="#">22010</a> | <a href="#">22020</a> | <a href="#">22030</a> | <a href="#">22040</a> | <a href="#">22050</a> | <a href="#">22060</a> | <a href="#">22070</a> | <a href="#">22080</a> | <a href="#">22090</a> |
|                                                         | (21689)           | TTCAGATCCTCAGTTTTACATTCAACTCAGGACTTGTTCTTACCTTTCTTTTCCAATGTTACTTGTTTCCATGCTATACATGTCTCTGGGACCA  |                       |                       |                       |                       |                       |                       |                       |                       |                       |
|                                                         |                   |                                                                                                 |                       |                       |                       |                       |                       |                       |                       |                       | Section 236           |
| Hepatitis B virus NC_003977.2<br>SARS-CoV-2 NC_045512.2 | (22091)<br>(3183) | <a href="#">22091</a>                                                                           | <a href="#">22100</a> | <a href="#">22110</a> | <a href="#">22120</a> | <a href="#">22130</a> | <a href="#">22140</a> | <a href="#">22150</a> | <a href="#">22160</a> | <a href="#">22170</a> | <a href="#">22184</a> |
|                                                         | (21783)           | ATGGTACTAAGAGGTTTGATAACCCTGTCTTACCATTTAATGATGGTGTTTATTTTGCTTCCACTGAGAAGTCTAACATAATAAGAGGCTGGAT  |                       |                       |                       |                       |                       |                       |                       |                       |                       |
|                                                         |                   |                                                                                                 |                       |                       |                       |                       |                       |                       |                       |                       | Section 237           |
| Hepatitis B virus NC_003977.2<br>SARS-CoV-2 NC_045512.2 | (22185)<br>(3183) | <a href="#">22185</a>                                                                           | <a href="#">22190</a> | <a href="#">22200</a> | <a href="#">22210</a> | <a href="#">22220</a> | <a href="#">22230</a> | <a href="#">22240</a> | <a href="#">22250</a> | <a href="#">22260</a> | <a href="#">22278</a> |
|                                                         | (21877)           | TTTTGGTACTACTTTAGATTTCGAAGACCCAGTCCCTACTTATTGTTAATAACGCTACTAATGTTGTTATTAAAGTCTGTGAATTTCAATTTTGT |                       |                       |                       |                       |                       |                       |                       |                       |                       |
|                                                         |                   |                                                                                                 |                       |                       |                       |                       |                       |                       |                       |                       | Section 238           |
| Hepatitis B virus NC_003977.2<br>SARS-CoV-2 NC_045512.2 | (22279)<br>(3183) | <a href="#">22279</a>                                                                           | <a href="#">22290</a> | <a href="#">22300</a> | <a href="#">22310</a> | <a href="#">22320</a> | <a href="#">22330</a> | <a href="#">22340</a> | <a href="#">22350</a> | <a href="#">22360</a> | <a href="#">22372</a> |
|                                                         | (21971)           | AATGATCCATTTTTGGGTGTTTATTACCACAAAAACAACAAAAGTTGGATGGAAAGTGAGTTCAGAGTTTATTCTAGTGCGAATAATTGCACCTT |                       |                       |                       |                       |                       |                       |                       |                       |                       |

SARS-CoV-2 & Hepatitis B.apr

|                                                                                                 |         |                       |                       |                       |                       |                       |                       |                       |                       |                       |                       |
|-------------------------------------------------------------------------------------------------|---------|-----------------------|-----------------------|-----------------------|-----------------------|-----------------------|-----------------------|-----------------------|-----------------------|-----------------------|-----------------------|
|                                                                                                 |         |                       |                       |                       |                       |                       |                       |                       |                       |                       | Section 239           |
| Hepatitis B virus NC_003977.2<br>SARS-CoV-2 NC_045512.2                                         | (22373) | <a href="#">22373</a> | <a href="#">22380</a> | <a href="#">22390</a> | <a href="#">22400</a> | <a href="#">22410</a> | <a href="#">22420</a> | <a href="#">22430</a> | <a href="#">22440</a> | <a href="#">22450</a> | <a href="#">22466</a> |
|                                                                                                 | (3183)  | -----                 |                       |                       |                       |                       |                       |                       |                       |                       |                       |
| TTGAATATGTCTCTCAGCCTTTTCTTATGGACCTTGAAGGAAAACAGGGTAATTTCAAAAATCTTAGGGAATTTGTGTTTAAGAATATTGATGG  |         |                       |                       |                       |                       |                       |                       |                       |                       |                       |                       |
|                                                                                                 |         |                       |                       |                       |                       |                       |                       |                       |                       |                       | Section 240           |
| Hepatitis B virus NC_003977.2<br>SARS-CoV-2 NC_045512.2                                         | (22467) | <a href="#">22467</a> | <a href="#">22480</a> | <a href="#">22490</a> | <a href="#">22500</a> | <a href="#">22510</a> | <a href="#">22520</a> | <a href="#">22530</a> | <a href="#">22540</a> | <a href="#">22550</a> | <a href="#">22560</a> |
|                                                                                                 | (3183)  | -----                 |                       |                       |                       |                       |                       |                       |                       |                       |                       |
| TTATTTTAAAAATATATTCTAAGCACACGCCTATTAATTTAGTGCGTGATCTCCCTCAGGGTTTTTCGGCTTTAGAACCATTGGTAGATTTGCCA |         |                       |                       |                       |                       |                       |                       |                       |                       |                       |                       |
|                                                                                                 |         |                       |                       |                       |                       |                       |                       |                       |                       |                       | Section 241           |
| Hepatitis B virus NC_003977.2<br>SARS-CoV-2 NC_045512.2                                         | (22561) | <a href="#">22561</a> | <a href="#">22570</a> | <a href="#">22580</a> | <a href="#">22590</a> | <a href="#">22600</a> | <a href="#">22610</a> | <a href="#">22620</a> | <a href="#">22630</a> | <a href="#">22640</a> | <a href="#">22654</a> |
|                                                                                                 | (3183)  | -----                 |                       |                       |                       |                       |                       |                       |                       |                       |                       |
| ATAGGTATTAACATCACTAGGTTTCAAACCTTTACTTGCTTTACATAGAAGTTATTTGACTCCTGGTGATTCTTCTTCAGGTTGGACAGCTGGTG |         |                       |                       |                       |                       |                       |                       |                       |                       |                       |                       |
|                                                                                                 |         |                       |                       |                       |                       |                       |                       |                       |                       |                       | Section 242           |
| Hepatitis B virus NC_003977.2<br>SARS-CoV-2 NC_045512.2                                         | (22655) | <a href="#">22655</a> | <a href="#">22660</a> | <a href="#">22670</a> | <a href="#">22680</a> | <a href="#">22690</a> | <a href="#">22700</a> | <a href="#">22710</a> | <a href="#">22720</a> | <a href="#">22730</a> | <a href="#">22748</a> |
|                                                                                                 | (3183)  | -----                 |                       |                       |                       |                       |                       |                       |                       |                       |                       |
| CTGCAGCTTATTATGTGGGTTATCTTCAACCTAGGACTTTTCTATTAAAATATAATGAAAATGGAACCATTACAGATGCTGTAGACTGTGCACT  |         |                       |                       |                       |                       |                       |                       |                       |                       |                       |                       |
|                                                                                                 |         |                       |                       |                       |                       |                       |                       |                       |                       |                       | Section 243           |
| Hepatitis B virus NC_003977.2<br>SARS-CoV-2 NC_045512.2                                         | (22749) | <a href="#">22749</a> | <a href="#">22760</a> | <a href="#">22770</a> | <a href="#">22780</a> | <a href="#">22790</a> | <a href="#">22800</a> | <a href="#">22810</a> | <a href="#">22820</a> | <a href="#">22830</a> | <a href="#">22842</a> |
|                                                                                                 | (3183)  | -----                 |                       |                       |                       |                       |                       |                       |                       |                       |                       |
| TGACCCTCTCTCAGAAACAAAGTGACGTTGAAATCCTTCACTGTAGAAAAAGGAATCTATCAAACCTTCTAACTTTAGAGTCCAACCAACAGAA  |         |                       |                       |                       |                       |                       |                       |                       |                       |                       |                       |
|                                                                                                 |         |                       |                       |                       |                       |                       |                       |                       |                       |                       | Section 244           |
| Hepatitis B virus NC_003977.2<br>SARS-CoV-2 NC_045512.2                                         | (22843) | <a href="#">22843</a> | <a href="#">22850</a> | <a href="#">22860</a> | <a href="#">22870</a> | <a href="#">22880</a> | <a href="#">22890</a> | <a href="#">22900</a> | <a href="#">22910</a> | <a href="#">22920</a> | <a href="#">22936</a> |
|                                                                                                 | (3183)  | -----                 |                       |                       |                       |                       |                       |                       |                       |                       |                       |
| TCTATTGTTAGATTTTCTAATATTACAAACTTGTGCCCTTTTGGTGAAGTTTTTAACGCCACCAGATTTGCATCTGTTTATGCTTGGAACAGGA  |         |                       |                       |                       |                       |                       |                       |                       |                       |                       |                       |
|                                                                                                 |         |                       |                       |                       |                       |                       |                       |                       |                       |                       | Section 245           |
| Hepatitis B virus NC_003977.2<br>SARS-CoV-2 NC_045512.2                                         | (22937) | <a href="#">22937</a> | <a href="#">22950</a> | <a href="#">22960</a> | <a href="#">22970</a> | <a href="#">22980</a> | <a href="#">22990</a> | <a href="#">23000</a> | <a href="#">23010</a> | <a href="#">23020</a> | <a href="#">23030</a> |
|                                                                                                 | (3183)  | -----                 |                       |                       |                       |                       |                       |                       |                       |                       |                       |
| AGAGAATCAGCAACTGTGTTGCTGATTATTCTGTCTATATAATTCCGCATCATTTTCCACTTTTAAGTGTTATGGAGTGTCTCCTACTAAATT   |         |                       |                       |                       |                       |                       |                       |                       |                       |                       |                       |

SARS-CoV-2 & Hepatitis B.apr

|                                                                                                 |         |                       |                       |                       |                       |                       |                       |                       |                       |                       |                       |
|-------------------------------------------------------------------------------------------------|---------|-----------------------|-----------------------|-----------------------|-----------------------|-----------------------|-----------------------|-----------------------|-----------------------|-----------------------|-----------------------|
|                                                                                                 |         |                       |                       |                       |                       |                       |                       |                       |                       |                       | Section 246           |
| Hepatitis B virus NC_003977.2<br>SARS-CoV-2 NC_045512.2                                         | (23031) | <a href="#">23031</a> | <a href="#">23040</a> | <a href="#">23050</a> | <a href="#">23060</a> | <a href="#">23070</a> | <a href="#">23080</a> | <a href="#">23090</a> | <a href="#">23100</a> | <a href="#">23110</a> | <a href="#">23124</a> |
|                                                                                                 | (3183)  | -----                 |                       |                       |                       |                       |                       |                       |                       |                       |                       |
| AAATGATCTCTGCTTTACTAATGTCTATGCAGATTCATTTGTAATTAGAGGTGATGAAGTCAGACAAATCGCTCCAGGGCAAAC TGGAAAGATT |         |                       |                       |                       |                       |                       |                       |                       |                       |                       |                       |
|                                                                                                 |         |                       |                       |                       |                       |                       |                       |                       |                       |                       | Section 247           |
| Hepatitis B virus NC_003977.2<br>SARS-CoV-2 NC_045512.2                                         | (23125) | <a href="#">23125</a> | <a href="#">23130</a> | <a href="#">23140</a> | <a href="#">23150</a> | <a href="#">23160</a> | <a href="#">23170</a> | <a href="#">23180</a> | <a href="#">23190</a> | <a href="#">23200</a> | <a href="#">23218</a> |
|                                                                                                 | (3183)  | -----                 |                       |                       |                       |                       |                       |                       |                       |                       |                       |
| GCTGATTATAATTATAAAATTACCAGATGATTTTACAGGCTGCGTTATAGCTTGGAATTCTAACAATCTTGATTCTAAGGTTGGTGGTAATTATA |         |                       |                       |                       |                       |                       |                       |                       |                       |                       |                       |
|                                                                                                 |         |                       |                       |                       |                       |                       |                       |                       |                       |                       | Section 248           |
| Hepatitis B virus NC_003977.2<br>SARS-CoV-2 NC_045512.2                                         | (23219) | <a href="#">23219</a> | <a href="#">23230</a> | <a href="#">23240</a> | <a href="#">23250</a> | <a href="#">23260</a> | <a href="#">23270</a> | <a href="#">23280</a> | <a href="#">23290</a> | <a href="#">23300</a> | <a href="#">23312</a> |
|                                                                                                 | (3183)  | -----                 |                       |                       |                       |                       |                       |                       |                       |                       |                       |
| ATTACCTGTATAGATTGTTTAGGAAGTCTAATCTCAAACCTTTTGAGAGAGATATTTCAACTGAAATCTATCAGGCCGGTAGCACACCTTGTA   |         |                       |                       |                       |                       |                       |                       |                       |                       |                       |                       |
|                                                                                                 |         |                       |                       |                       |                       |                       |                       |                       |                       |                       | Section 249           |
| Hepatitis B virus NC_003977.2<br>SARS-CoV-2 NC_045512.2                                         | (23313) | <a href="#">23313</a> | <a href="#">23320</a> | <a href="#">23330</a> | <a href="#">23340</a> | <a href="#">23350</a> | <a href="#">23360</a> | <a href="#">23370</a> | <a href="#">23380</a> | <a href="#">23390</a> | <a href="#">23406</a> |
|                                                                                                 | (3183)  | -----                 |                       |                       |                       |                       |                       |                       |                       |                       |                       |
| TGGTGTTGAAGGTTTTAATTGTTACTTTCCTTTACAATCATATGGTTTCCAACCCACTAATGGTGTTGGTTACCAACCATACAGAGTAGTAGTA  |         |                       |                       |                       |                       |                       |                       |                       |                       |                       |                       |
|                                                                                                 |         |                       |                       |                       |                       |                       |                       |                       |                       |                       | Section 250           |
| Hepatitis B virus NC_003977.2<br>SARS-CoV-2 NC_045512.2                                         | (23407) | <a href="#">23407</a> | <a href="#">23420</a> | <a href="#">23430</a> | <a href="#">23440</a> | <a href="#">23450</a> | <a href="#">23460</a> | <a href="#">23470</a> | <a href="#">23480</a> | <a href="#">23490</a> | <a href="#">23500</a> |
|                                                                                                 | (3183)  | -----                 |                       |                       |                       |                       |                       |                       |                       |                       |                       |
| CTTTCTTTTGAACCTTCTACATGCACCAGCAACTGTTTGTGGACCTAAAAAGTCTACTAATTTGGTTAAAAACAAATGTGTCAATTTCAACTTCA |         |                       |                       |                       |                       |                       |                       |                       |                       |                       |                       |
|                                                                                                 |         |                       |                       |                       |                       |                       |                       |                       |                       |                       | Section 251           |
| Hepatitis B virus NC_003977.2<br>SARS-CoV-2 NC_045512.2                                         | (23501) | <a href="#">23501</a> | <a href="#">23510</a> | <a href="#">23520</a> | <a href="#">23530</a> | <a href="#">23540</a> | <a href="#">23550</a> | <a href="#">23560</a> | <a href="#">23570</a> | <a href="#">23580</a> | <a href="#">23594</a> |
|                                                                                                 | (3183)  | -----                 |                       |                       |                       |                       |                       |                       |                       |                       |                       |
| ATGGTTTAAACAGGCACAGGTGTTCTTACTGAGTCTAACAAAAAGTTTCTGCCTTTCCAACAATTTGGCAGAGACATTGCTGACACTACTGATGC |         |                       |                       |                       |                       |                       |                       |                       |                       |                       |                       |
|                                                                                                 |         |                       |                       |                       |                       |                       |                       |                       |                       |                       | Section 252           |
| Hepatitis B virus NC_003977.2<br>SARS-CoV-2 NC_045512.2                                         | (23595) | <a href="#">23595</a> | <a href="#">23600</a> | <a href="#">23610</a> | <a href="#">23620</a> | <a href="#">23630</a> | <a href="#">23640</a> | <a href="#">23650</a> | <a href="#">23660</a> | <a href="#">23670</a> | <a href="#">23688</a> |
|                                                                                                 | (3183)  | -----                 |                       |                       |                       |                       |                       |                       |                       |                       |                       |
| TGTCCGTGATCCACAGACACTTGAGATTCTTGACATTACACCATGTTCTTTTGGTGGTGTCAGTGTTATAACACCAGGAACAATACTTCTAAC   |         |                       |                       |                       |                       |                       |                       |                       |                       |                       |                       |

## SARS-CoV-2 &amp; Hepatitis B.apr

|                                                         |                   |                                                                                                 |                       |                       |                       |                       |                       |                       |                       |                       |                       |
|---------------------------------------------------------|-------------------|-------------------------------------------------------------------------------------------------|-----------------------|-----------------------|-----------------------|-----------------------|-----------------------|-----------------------|-----------------------|-----------------------|-----------------------|
|                                                         |                   |                                                                                                 |                       |                       |                       |                       |                       |                       |                       |                       | Section 253           |
| Hepatitis B virus NC_003977.2<br>SARS-CoV-2 NC_045512.2 | (23689)<br>(3183) | <a href="#">23689</a>                                                                           | <a href="#">23700</a> | <a href="#">23710</a> | <a href="#">23720</a> | <a href="#">23730</a> | <a href="#">23740</a> | <a href="#">23750</a> | <a href="#">23760</a> | <a href="#">23770</a> | <a href="#">23782</a> |
|                                                         | (23381)           | CAGGTTGCTGTTCTTTATCAGGATGTTAACTGCACAGAAGTCCCTGTTGCTATTCATGCAGATCAACTTACTCCTACTTGGCGTGTTTATTCTA  |                       |                       |                       |                       |                       |                       |                       |                       |                       |
|                                                         |                   |                                                                                                 |                       |                       |                       |                       |                       |                       |                       |                       | Section 254           |
| Hepatitis B virus NC_003977.2<br>SARS-CoV-2 NC_045512.2 | (23783)<br>(3183) | <a href="#">23783</a>                                                                           | <a href="#">23790</a> | <a href="#">23800</a> | <a href="#">23810</a> | <a href="#">23820</a> | <a href="#">23830</a> | <a href="#">23840</a> | <a href="#">23850</a> | <a href="#">23860</a> | <a href="#">23876</a> |
|                                                         | (23475)           | CAGGTTCTAATGTTTTTCAAACACGTGCAGGCTGTTTAATAGGGGCTGAACATGTCAACAACATCATATGAGTGTGACATACCCATTGGTGCAGG |                       |                       |                       |                       |                       |                       |                       |                       |                       |
|                                                         |                   |                                                                                                 |                       |                       |                       |                       |                       |                       |                       |                       | Section 255           |
| Hepatitis B virus NC_003977.2<br>SARS-CoV-2 NC_045512.2 | (23877)<br>(3183) | <a href="#">23877</a>                                                                           | <a href="#">23890</a> | <a href="#">23900</a> | <a href="#">23910</a> | <a href="#">23920</a> | <a href="#">23930</a> | <a href="#">23940</a> | <a href="#">23950</a> | <a href="#">23960</a> | <a href="#">23970</a> |
|                                                         | (23569)           | TATATGCGCTAGTTATCAGACTCAGACTAATTCTCCTCGGCGGGCACGTAGTGTAGCTAGTCAATCCATCATTGCCTACACTATGTCACCTGGT  |                       |                       |                       |                       |                       |                       |                       |                       |                       |
|                                                         |                   |                                                                                                 |                       |                       |                       |                       |                       |                       |                       |                       | Section 256           |
| Hepatitis B virus NC_003977.2<br>SARS-CoV-2 NC_045512.2 | (23971)<br>(3183) | <a href="#">23971</a>                                                                           | <a href="#">23980</a> | <a href="#">23990</a> | <a href="#">24000</a> | <a href="#">24010</a> | <a href="#">24020</a> | <a href="#">24030</a> | <a href="#">24040</a> | <a href="#">24050</a> | <a href="#">24064</a> |
|                                                         | (23663)           | GCAGAAAATTCAGTTGCTTACTCTAATAACTCTATTGCCATACCCACAAATTTTACTATTAGTGTACCACAGAAATTCTACCAGTGTCTATGA   |                       |                       |                       |                       |                       |                       |                       |                       |                       |
|                                                         |                   |                                                                                                 |                       |                       |                       |                       |                       |                       |                       |                       | Section 257           |
| Hepatitis B virus NC_003977.2<br>SARS-CoV-2 NC_045512.2 | (24065)<br>(3183) | <a href="#">24065</a>                                                                           | <a href="#">24070</a> | <a href="#">24080</a> | <a href="#">24090</a> | <a href="#">24100</a> | <a href="#">24110</a> | <a href="#">24120</a> | <a href="#">24130</a> | <a href="#">24140</a> | <a href="#">24158</a> |
|                                                         | (23757)           | CCAAGACATCAGTAGATTGTACAATGTACATTTGTGGTGATTCAACTGAATGCAGCAATCTTTTGTTGCAATATGGCAGTTTTTGTACACAATT  |                       |                       |                       |                       |                       |                       |                       |                       |                       |
|                                                         |                   |                                                                                                 |                       |                       |                       |                       |                       |                       |                       |                       | Section 258           |
| Hepatitis B virus NC_003977.2<br>SARS-CoV-2 NC_045512.2 | (24159)<br>(3183) | <a href="#">24159</a>                                                                           | <a href="#">24170</a> | <a href="#">24180</a> | <a href="#">24190</a> | <a href="#">24200</a> | <a href="#">24210</a> | <a href="#">24220</a> | <a href="#">24230</a> | <a href="#">24240</a> | <a href="#">24252</a> |
|                                                         | (23851)           | AAACCGTGCTTTAACTGGAATAGCTGTTGAACAAGACAAAAACACCCAAGAAGTTTTTGCACAAGTCAAACAAATTTACAAAACACCACCAATT  |                       |                       |                       |                       |                       |                       |                       |                       |                       |
|                                                         |                   |                                                                                                 |                       |                       |                       |                       |                       |                       |                       |                       | Section 259           |
| Hepatitis B virus NC_003977.2<br>SARS-CoV-2 NC_045512.2 | (24253)<br>(3183) | <a href="#">24253</a>                                                                           | <a href="#">24260</a> | <a href="#">24270</a> | <a href="#">24280</a> | <a href="#">24290</a> | <a href="#">24300</a> | <a href="#">24310</a> | <a href="#">24320</a> | <a href="#">24330</a> | <a href="#">24346</a> |
|                                                         | (23945)           | AAAGATTTTGGTGGTTTTAATTTTTTCACAAATATTACCAGATCCATCAAAACCAAGCAAGAGGTCATTTATTGAAGATCTACTTTTCAACAAAG |                       |                       |                       |                       |                       |                       |                       |                       |                       |

## SARS-CoV-2 &amp; Hepatitis B.apr

|                                              |                                                                                                |       |       |       |       |       |       |       |       |             |  |
|----------------------------------------------|------------------------------------------------------------------------------------------------|-------|-------|-------|-------|-------|-------|-------|-------|-------------|--|
|                                              |                                                                                                |       |       |       |       |       |       |       |       | Section 260 |  |
| Hepatitis B virus NC_003977.2 (24347) (3183) | 24347                                                                                          | 24360 | 24370 | 24380 | 24390 | 24400 | 24410 | 24420 | 24430 | 24440       |  |
|                                              | -----                                                                                          |       |       |       |       |       |       |       |       |             |  |
| SARS-CoV-2 NC_045512.2 (24039)               | TGACACTTGCAGATGCTGGCTTCATCAAACAATATGGTGATTGCCTTGGTGATATTGCTGCTAGAGACCTCATTGTGCACAAAAGTTTAACGG  |       |       |       |       |       |       |       |       |             |  |
|                                              |                                                                                                |       |       |       |       |       |       |       |       | Section 261 |  |
| Hepatitis B virus NC_003977.2 (24441) (3183) | 24441                                                                                          | 24450 | 24460 | 24470 | 24480 | 24490 | 24500 | 24510 | 24520 | 24534       |  |
|                                              | -----                                                                                          |       |       |       |       |       |       |       |       |             |  |
| SARS-CoV-2 NC_045512.2 (24133)               | CCTTACTGTTTTGCCACCTTTGCTCACAGATGAAATGATTGCTCAATACACTTCTGCACTGTTAGCGGGTACAATCACTTCTGGTTGGACCTTT |       |       |       |       |       |       |       |       |             |  |
|                                              |                                                                                                |       |       |       |       |       |       |       |       | Section 262 |  |
| Hepatitis B virus NC_003977.2 (24535) (3183) | 24535                                                                                          | 24540 | 24550 | 24560 | 24570 | 24580 | 24590 | 24600 | 24610 | 24628       |  |
|                                              | -----                                                                                          |       |       |       |       |       |       |       |       |             |  |
| SARS-CoV-2 NC_045512.2 (24227)               | GGTGCAGGTGCTGCATTACAAATACCATTGCTATGCAAATGGCTTATAGGTTTAAATGGTATTGGAGTTACACAGAATGTTCTCTATGAGAACC |       |       |       |       |       |       |       |       |             |  |
|                                              |                                                                                                |       |       |       |       |       |       |       |       | Section 263 |  |
| Hepatitis B virus NC_003977.2 (24629) (3183) | 24629                                                                                          | 24640 | 24650 | 24660 | 24670 | 24680 | 24690 | 24700 | 24710 | 24722       |  |
|                                              | -----                                                                                          |       |       |       |       |       |       |       |       |             |  |
| SARS-CoV-2 NC_045512.2 (24321)               | AAAAATTGATTGCCAACCAATTTAATAGTGCTATTGGCAAAATTCAGACTCACTTTCTTCCACAGCAAGTGCACCTTGAAAACTTCAAGATGT  |       |       |       |       |       |       |       |       |             |  |
|                                              |                                                                                                |       |       |       |       |       |       |       |       | Section 264 |  |
| Hepatitis B virus NC_003977.2 (24723) (3183) | 24723                                                                                          | 24730 | 24740 | 24750 | 24760 | 24770 | 24780 | 24790 | 24800 | 24816       |  |
|                                              | -----                                                                                          |       |       |       |       |       |       |       |       |             |  |
| SARS-CoV-2 NC_045512.2 (24415)               | GGTCAACCAAAATGCACAAGCTTTAAACACGCTTGTTAAACAACCTAGCTCCAATTTTGGTGCAATTTCAAGTGTTTTAAATGATATCCTTTCA |       |       |       |       |       |       |       |       |             |  |
|                                              |                                                                                                |       |       |       |       |       |       |       |       | Section 265 |  |
| Hepatitis B virus NC_003977.2 (24817) (3183) | 24817                                                                                          | 24830 | 24840 | 24850 | 24860 | 24870 | 24880 | 24890 | 24900 | 24910       |  |
|                                              | -----                                                                                          |       |       |       |       |       |       |       |       |             |  |
| SARS-CoV-2 NC_045512.2 (24509)               | CGTCTTGACAAAGTTGAGGCTGAAGTGCAAATTGATAGGTTGATCACAGGCAGACTTCAAAGTTTGCAGACATATGTGACTCAACAATTAATTA |       |       |       |       |       |       |       |       |             |  |
|                                              |                                                                                                |       |       |       |       |       |       |       |       | Section 266 |  |
| Hepatitis B virus NC_003977.2 (24911) (3183) | 24911                                                                                          | 24920 | 24930 | 24940 | 24950 | 24960 | 24970 | 24980 | 24990 | 25004       |  |
|                                              | -----                                                                                          |       |       |       |       |       |       |       |       |             |  |
| SARS-CoV-2 NC_045512.2 (24603)               | GAGCTGCAGAAATCAGAGCTTCTGCTAATCTTGCTGCTACTAAAATGTCAGAGTGTTGACTTGGACAATCAAAAAGAGTTGATTTTTGTGGAAA |       |       |       |       |       |       |       |       |             |  |

SARS-CoV-2 & Hepatitis B.apr

|                                                         |                   |                                                                                                 |                       |                       |                       |                       |                       |                       |                       |                       |                       |
|---------------------------------------------------------|-------------------|-------------------------------------------------------------------------------------------------|-----------------------|-----------------------|-----------------------|-----------------------|-----------------------|-----------------------|-----------------------|-----------------------|-----------------------|
|                                                         |                   |                                                                                                 |                       |                       |                       |                       |                       |                       |                       |                       | Section 267           |
| Hepatitis B virus NC_003977.2<br>SARS-CoV-2 NC_045512.2 | (25005)<br>(3183) | <a href="#">25005</a>                                                                           | <a href="#">25010</a> | <a href="#">25020</a> | <a href="#">25030</a> | <a href="#">25040</a> | <a href="#">25050</a> | <a href="#">25060</a> | <a href="#">25070</a> | <a href="#">25080</a> | <a href="#">25098</a> |
|                                                         | (24697)           | GGGCTATCATCTTATGTCCTTCCCTCAGTCAGCACCTCATGGTGTAGTCTTCTTGTCATGTGACTTATGTCCCTGCACAAGAAAAGAACTTCACA |                       |                       |                       |                       |                       |                       |                       |                       |                       |
|                                                         |                   |                                                                                                 |                       |                       |                       |                       |                       |                       |                       |                       | Section 268           |
| Hepatitis B virus NC_003977.2<br>SARS-CoV-2 NC_045512.2 | (25099)<br>(3183) | <a href="#">25099</a>                                                                           | <a href="#">25110</a> | <a href="#">25120</a> | <a href="#">25130</a> | <a href="#">25140</a> | <a href="#">25150</a> | <a href="#">25160</a> | <a href="#">25170</a> | <a href="#">25180</a> | <a href="#">25192</a> |
|                                                         | (24791)           | ACTGCTCCTGCCATTTGTCATGATGGAAAAGCACACTTTCCTCGTGAAGGTGTCTTTGTTTCAAATGGCACACACTGGTTTGTAACACAAAGGA  |                       |                       |                       |                       |                       |                       |                       |                       |                       |
|                                                         |                   |                                                                                                 |                       |                       |                       |                       |                       |                       |                       |                       | Section 269           |
| Hepatitis B virus NC_003977.2<br>SARS-CoV-2 NC_045512.2 | (25193)<br>(3183) | <a href="#">25193</a>                                                                           | <a href="#">25200</a> | <a href="#">25210</a> | <a href="#">25220</a> | <a href="#">25230</a> | <a href="#">25240</a> | <a href="#">25250</a> | <a href="#">25260</a> | <a href="#">25270</a> | <a href="#">25286</a> |
|                                                         | (24885)           | ATTTTTATGAACCACAAATCATTACTACAGACAACACATTTGTGTCTGGTAACTGTGATGTTGTAATAGGAATTGTCAACAACACAGTTTATGA  |                       |                       |                       |                       |                       |                       |                       |                       |                       |
|                                                         |                   |                                                                                                 |                       |                       |                       |                       |                       |                       |                       |                       | Section 270           |
| Hepatitis B virus NC_003977.2<br>SARS-CoV-2 NC_045512.2 | (25287)<br>(3183) | <a href="#">25287</a>                                                                           | <a href="#">25300</a> | <a href="#">25310</a> | <a href="#">25320</a> | <a href="#">25330</a> | <a href="#">25340</a> | <a href="#">25350</a> | <a href="#">25360</a> | <a href="#">25370</a> | <a href="#">25380</a> |
|                                                         | (24979)           | TCCTTTGCAACCTGAATTAGACTCATTCAAGGAGGAGTTAGATAAATATTTTAAGAATCATAACATCACCAGATGTTGATTTAGGTGACATCTCT |                       |                       |                       |                       |                       |                       |                       |                       |                       |
|                                                         |                   |                                                                                                 |                       |                       |                       |                       |                       |                       |                       |                       | Section 271           |
| Hepatitis B virus NC_003977.2<br>SARS-CoV-2 NC_045512.2 | (25381)<br>(3183) | <a href="#">25381</a>                                                                           | <a href="#">25390</a> | <a href="#">25400</a> | <a href="#">25410</a> | <a href="#">25420</a> | <a href="#">25430</a> | <a href="#">25440</a> | <a href="#">25450</a> | <a href="#">25460</a> | <a href="#">25474</a> |
|                                                         | (25073)           | GGCATTAATGCTTCAGTTGTAAACATTCAAAAAGAAATTGACCGCCTCAATGAGGTTGCCAAGAATTTAAATGAATCTCTCATCGATCTCCAAG  |                       |                       |                       |                       |                       |                       |                       |                       |                       |
|                                                         |                   |                                                                                                 |                       |                       |                       |                       |                       |                       |                       |                       | Section 272           |
| Hepatitis B virus NC_003977.2<br>SARS-CoV-2 NC_045512.2 | (25475)<br>(3183) | <a href="#">25475</a>                                                                           | <a href="#">25480</a> | <a href="#">25490</a> | <a href="#">25500</a> | <a href="#">25510</a> | <a href="#">25520</a> | <a href="#">25530</a> | <a href="#">25540</a> | <a href="#">25550</a> | <a href="#">25568</a> |
|                                                         | (25167)           | AACTTGGAAGTATGAGCAGTATATAAAATGGCCATGGTACATTTGGCTAGGTTTTATAGCTGGCTTGATTGCCATAGTAATGGTGACAATTAT   |                       |                       |                       |                       |                       |                       |                       |                       |                       |
|                                                         |                   |                                                                                                 |                       |                       |                       |                       |                       |                       |                       |                       | Section 273           |
| Hepatitis B virus NC_003977.2<br>SARS-CoV-2 NC_045512.2 | (25569)<br>(3183) | <a href="#">25569</a>                                                                           | <a href="#">25580</a> | <a href="#">25590</a> | <a href="#">25600</a> | <a href="#">25610</a> | <a href="#">25620</a> | <a href="#">25630</a> | <a href="#">25640</a> | <a href="#">25650</a> | <a href="#">25662</a> |
|                                                         | (25261)           | GCTTTGCTGTATGACCAGTTGCTGTAGTTGTCTCAAGGGCTGTTGTTCTTGTGGATCCTGCTGCAAATTTGATGAAGACGACTCTGAGCCAGTG  |                       |                       |                       |                       |                       |                       |                       |                       |                       |

## SARS-CoV-2 &amp; Hepatitis B.apr

|                                                         |                   |                                                                                                   |              |              |              |              |              |              |              |              |              |
|---------------------------------------------------------|-------------------|---------------------------------------------------------------------------------------------------|--------------|--------------|--------------|--------------|--------------|--------------|--------------|--------------|--------------|
|                                                         |                   |                                                                                                   |              |              |              |              |              |              |              |              | Section 274  |
| Hepatitis B virus NC_003977.2<br>SARS-CoV-2 NC_045512.2 | (25663)<br>(3183) | <u>25663</u>                                                                                      | <u>25670</u> | <u>25680</u> | <u>25690</u> | <u>25700</u> | <u>25710</u> | <u>25720</u> | <u>25730</u> | <u>25740</u> | <u>25756</u> |
|                                                         | (25355)           | CTCAAAGGAGTCAAATTACATTACACATAAACGAACCTTATGGATTTGTTTATGAGAATCTTCACAATTGGAACCTGTAACCTTTGAAGCAAGGTGA |              |              |              |              |              |              |              |              |              |
|                                                         |                   |                                                                                                   |              |              |              |              |              |              |              |              | Section 275  |
| Hepatitis B virus NC_003977.2<br>SARS-CoV-2 NC_045512.2 | (25757)<br>(3183) | <u>25757</u>                                                                                      | <u>25770</u> | <u>25780</u> | <u>25790</u> | <u>25800</u> | <u>25810</u> | <u>25820</u> | <u>25830</u> | <u>25840</u> | <u>25850</u> |
|                                                         | (25449)           | AATCAAGGATGCTACTCCTTCAGATTTTGTTCGCGCTACTGCAACGATACCGATACAAGCCTCACTCCCTTTTCGGATGGCTTATTGTTGGCGTT   |              |              |              |              |              |              |              |              |              |
|                                                         |                   |                                                                                                   |              |              |              |              |              |              |              |              | Section 276  |
| Hepatitis B virus NC_003977.2<br>SARS-CoV-2 NC_045512.2 | (25851)<br>(3183) | <u>25851</u>                                                                                      | <u>25860</u> | <u>25870</u> | <u>25880</u> | <u>25890</u> | <u>25900</u> | <u>25910</u> | <u>25920</u> | <u>25930</u> | <u>25944</u> |
|                                                         | (25543)           | GCACTTCTTGCTGTTTTTCAGAGCGCTTCCAAAATCATAAACCTCAAAAAGAGATGGCAACTAGCACTCTCCAAGGGTGTTCACTTTGTTTGCA    |              |              |              |              |              |              |              |              |              |
|                                                         |                   |                                                                                                   |              |              |              |              |              |              |              |              | Section 277  |
| Hepatitis B virus NC_003977.2<br>SARS-CoV-2 NC_045512.2 | (25945)<br>(3183) | <u>25945</u>                                                                                      | <u>25950</u> | <u>25960</u> | <u>25970</u> | <u>25980</u> | <u>25990</u> | <u>26000</u> | <u>26010</u> | <u>26020</u> | <u>26038</u> |
|                                                         | (25637)           | ACTTGCTGTTGTTGTTTGTAACAGTTTACTCACACCTTTTGCTCGTTGCTGCTGGCCTTGAAGCCCCCTTTCTCTATCTTTATGCTTTAGTCTA    |              |              |              |              |              |              |              |              |              |
|                                                         |                   |                                                                                                   |              |              |              |              |              |              |              |              | Section 278  |
| Hepatitis B virus NC_003977.2<br>SARS-CoV-2 NC_045512.2 | (26039)<br>(3183) | <u>26039</u>                                                                                      | <u>26050</u> | <u>26060</u> | <u>26070</u> | <u>26080</u> | <u>26090</u> | <u>26100</u> | <u>26110</u> | <u>26120</u> | <u>26132</u> |
|                                                         | (25731)           | CTTCTTGCGAGGTATAAACTTTGTAAGAATAATAATGAGGCTTTGGCTTTGCTGGAAATGCCGTTCCAAAACCCATTACTTTATGATGCCAAC     |              |              |              |              |              |              |              |              |              |
|                                                         |                   |                                                                                                   |              |              |              |              |              |              |              |              | Section 279  |
| Hepatitis B virus NC_003977.2<br>SARS-CoV-2 NC_045512.2 | (26133)<br>(3183) | <u>26133</u>                                                                                      | <u>26140</u> | <u>26150</u> | <u>26160</u> | <u>26170</u> | <u>26180</u> | <u>26190</u> | <u>26200</u> | <u>26210</u> | <u>26226</u> |
|                                                         | (25825)           | TATTTTCTTTGCTGGCATACTAATTGTTACGACTATTGTATACCTTACAATAGTGTAACCTTCTTCAATTGTCATTACTTCAGGTGATGGCACAA   |              |              |              |              |              |              |              |              |              |
|                                                         |                   |                                                                                                   |              |              |              |              |              |              |              |              | Section 280  |
| Hepatitis B virus NC_003977.2<br>SARS-CoV-2 NC_045512.2 | (26227)<br>(3183) | <u>26227</u>                                                                                      | <u>26240</u> | <u>26250</u> | <u>26260</u> | <u>26270</u> | <u>26280</u> | <u>26290</u> | <u>26300</u> | <u>26310</u> | <u>26320</u> |
|                                                         | (25919)           | CAAGTCCTATTTCTGAACATGACTACCAGATTGGTGGTTATACTGAAAAATGGGAATCTGGAGTAAAAGACTGTGTTGTATTACACAGTTACTT    |              |              |              |              |              |              |              |              |              |



SARS-CoV-2 & Hepatitis B.apr

|                                      |                                |                                                                                                 |                       |                       |                       |                       |                       |                       |                       |                       |                       |
|--------------------------------------|--------------------------------|-------------------------------------------------------------------------------------------------|-----------------------|-----------------------|-----------------------|-----------------------|-----------------------|-----------------------|-----------------------|-----------------------|-----------------------|
|                                      |                                |                                                                                                 |                       |                       |                       |                       |                       |                       |                       |                       | Section 281           |
| Hepatitis B virus NC_003977.2 (3183) | (26321)                        | <a href="#">26321</a>                                                                           | <a href="#">26330</a> | <a href="#">26340</a> | <a href="#">26350</a> | <a href="#">26360</a> | <a href="#">26370</a> | <a href="#">26380</a> | <a href="#">26390</a> | <a href="#">26400</a> | <a href="#">26414</a> |
|                                      | SARS-CoV-2 NC_045512.2 (26013) | CACTTCAGACTATTACCAGCTGTACTCAACTCAATTGAGTACAGACACTGGTGTGTAACATGTTACCTTCTTCATCTACAATAAAATTGTTGAT  |                       |                       |                       |                       |                       |                       |                       |                       |                       |
|                                      |                                |                                                                                                 |                       |                       |                       |                       |                       |                       |                       |                       | Section 282           |
| Hepatitis B virus NC_003977.2 (3183) | (26415)                        | <a href="#">26415</a>                                                                           | <a href="#">26420</a> | <a href="#">26430</a> | <a href="#">26440</a> | <a href="#">26450</a> | <a href="#">26460</a> | <a href="#">26470</a> | <a href="#">26480</a> | <a href="#">26490</a> | <a href="#">26508</a> |
|                                      | SARS-CoV-2 NC_045512.2 (26107) | GAGCCTGAAGAACATGTCCAAATTCACACAATCGACGGTTCATCCGGAGTTGTTAATCCAGTAATGGAACCAATTTATGATGAACCGACGACGA  |                       |                       |                       |                       |                       |                       |                       |                       |                       |
|                                      |                                |                                                                                                 |                       |                       |                       |                       |                       |                       |                       |                       | Section 283           |
| Hepatitis B virus NC_003977.2 (3183) | (26509)                        | <a href="#">26509</a>                                                                           | <a href="#">26520</a> | <a href="#">26530</a> | <a href="#">26540</a> | <a href="#">26550</a> | <a href="#">26560</a> | <a href="#">26570</a> | <a href="#">26580</a> | <a href="#">26590</a> | <a href="#">26602</a> |
|                                      | SARS-CoV-2 NC_045512.2 (26201) | CTACTAGCGTGCCTTTGTAAGCACAAAGCTGATGAGTACGAACTTATGTACTCATTCGTTTCGGAAGAGACAGGTACGTTAATAGTTAATAGCGT |                       |                       |                       |                       |                       |                       |                       |                       |                       |
|                                      |                                |                                                                                                 |                       |                       |                       |                       |                       |                       |                       |                       | Section 284           |
| Hepatitis B virus NC_003977.2 (3183) | (26603)                        | <a href="#">26603</a>                                                                           | <a href="#">26610</a> | <a href="#">26620</a> | <a href="#">26630</a> | <a href="#">26640</a> | <a href="#">26650</a> | <a href="#">26660</a> | <a href="#">26670</a> | <a href="#">26680</a> | <a href="#">26696</a> |
|                                      | SARS-CoV-2 NC_045512.2 (26295) | ACTTCTTTTTCTTGCTTTTCGTGGTATTCTTGCTAGTTACACTAGCCATCCTTACTGCGCTTCGATTGTGTGCGTACTGCTGCAATATTGTTAAC |                       |                       |                       |                       |                       |                       |                       |                       |                       |
|                                      |                                |                                                                                                 |                       |                       |                       |                       |                       |                       |                       |                       | Section 285           |
| Hepatitis B virus NC_003977.2 (3183) | (26697)                        | <a href="#">26697</a>                                                                           | <a href="#">26710</a> | <a href="#">26720</a> | <a href="#">26730</a> | <a href="#">26740</a> | <a href="#">26750</a> | <a href="#">26760</a> | <a href="#">26770</a> | <a href="#">26780</a> | <a href="#">26790</a> |
|                                      | SARS-CoV-2 NC_045512.2 (26389) | GTGAGTCTTGTAACCTTCTTTTTTACGTTTACTCTCGTGTTAAAAATCTGAATTCTTCTAGAGTTCTGATCTTCTGGTCTAAACGAACTAAA    |                       |                       |                       |                       |                       |                       |                       |                       |                       |
|                                      |                                |                                                                                                 |                       |                       |                       |                       |                       |                       |                       |                       | Section 286           |
| Hepatitis B virus NC_003977.2 (3183) | (26791)                        | <a href="#">26791</a>                                                                           | <a href="#">26800</a> | <a href="#">26810</a> | <a href="#">26820</a> | <a href="#">26830</a> | <a href="#">26840</a> | <a href="#">26850</a> | <a href="#">26860</a> | <a href="#">26870</a> | <a href="#">26884</a> |
|                                      | SARS-CoV-2 NC_045512.2 (26483) | TATTATATTAGTTTTTCTGTTTGGAACCTTAATTTTAGCCATGGCAGATTCCAACGGTACTATTACCGTTGAAGAGCTTAAAAAGCTCCTTGAA  |                       |                       |                       |                       |                       |                       |                       |                       |                       |
|                                      |                                |                                                                                                 |                       |                       |                       |                       |                       |                       |                       |                       | Section 287           |
| Hepatitis B virus NC_003977.2 (3183) | (26885)                        | <a href="#">26885</a>                                                                           | <a href="#">26890</a> | <a href="#">26900</a> | <a href="#">26910</a> | <a href="#">26920</a> | <a href="#">26930</a> | <a href="#">26940</a> | <a href="#">26950</a> | <a href="#">26960</a> | <a href="#">26978</a> |
|                                      | SARS-CoV-2 NC_045512.2 (26577) | CAATGGAACCTAGTAATAGGTTTCCTATTCTTACATGGATTTGTCTTCTACAATTTGCCTATGCCAACAGGAATAGGTTTTTGTATATAATTA   |                       |                       |                       |                       |                       |                       |                       |                       |                       |

## SARS-CoV-2 &amp; Hepatitis B.apr

|                                              |                                                                                                                                 |       |       |       |       |       |       |       |       |             |
|----------------------------------------------|---------------------------------------------------------------------------------------------------------------------------------|-------|-------|-------|-------|-------|-------|-------|-------|-------------|
|                                              |                                                                                                                                 |       |       |       |       |       |       |       |       | Section 288 |
| Hepatitis B virus NC_003977.2 (26979) (3183) | 26979                                                                                                                           | 26990 | 27000 | 27010 | 27020 | 27030 | 27040 | 27050 | 27060 | 27072       |
|                                              | SARS-CoV-2 NC_045512.2 (26671) AGTTAATTTTCCTCTGGCTGTTATGGCCAGTAACTTTAGCTTGTTTTGTGCTTGCTGCTGTTTACAGAATAAATTGGATCACCGGTGGAATTGC   |       |       |       |       |       |       |       |       |             |
|                                              |                                                                                                                                 |       |       |       |       |       |       |       |       | Section 289 |
| Hepatitis B virus NC_003977.2 (27073) (3183) | 27073                                                                                                                           | 27080 | 27090 | 27100 | 27110 | 27120 | 27130 | 27140 | 27150 | 27166       |
|                                              | SARS-CoV-2 NC_045512.2 (26765) TATCGCAATGGCTTGCTCTGTAGGCTTGATGTGGCTCAGCTACTTCATTGCTTCTTTTCAGACTGTTTGCGCGTACGCGTTCCATGTGGTCATTTC |       |       |       |       |       |       |       |       |             |
|                                              |                                                                                                                                 |       |       |       |       |       |       |       |       | Section 290 |
| Hepatitis B virus NC_003977.2 (27167) (3183) | 27167                                                                                                                           | 27180 | 27190 | 27200 | 27210 | 27220 | 27230 | 27240 | 27250 | 27260       |
|                                              | SARS-CoV-2 NC_045512.2 (26859) AATCCAGAACTAACATTCTTCTCAACGTGCCACTCCATGGCACTATTCTGACCAGACCGCTTCTAGAAAGTGAACCTCGTAATCGGAGCTGTGA   |       |       |       |       |       |       |       |       |             |
|                                              |                                                                                                                                 |       |       |       |       |       |       |       |       | Section 291 |
| Hepatitis B virus NC_003977.2 (27261) (3183) | 27261                                                                                                                           | 27270 | 27280 | 27290 | 27300 | 27310 | 27320 | 27330 | 27340 | 27354       |
|                                              | SARS-CoV-2 NC_045512.2 (26953) TCCTTCGTGGACATCTTCGTATTGCTGGACACCATCTAGGACGCTGTGACATCAAGGACCTGCCTAAAGAAATCACTGTTGCTACATCACGAAC   |       |       |       |       |       |       |       |       |             |
|                                              |                                                                                                                                 |       |       |       |       |       |       |       |       | Section 292 |
| Hepatitis B virus NC_003977.2 (27355) (3183) | 27355                                                                                                                           | 27360 | 27370 | 27380 | 27390 | 27400 | 27410 | 27420 | 27430 | 27448       |
|                                              | SARS-CoV-2 NC_045512.2 (27047) GCTTTCTTATTACAAATTGGGAGCTTCGCAGCGTGCTAGCAGGTGACTCAGGTTTTGCTGCATACAGTCGCTACAGGATTGGCAACTATAAATTA  |       |       |       |       |       |       |       |       |             |
|                                              |                                                                                                                                 |       |       |       |       |       |       |       |       | Section 293 |
| Hepatitis B virus NC_003977.2 (27449) (3183) | 27449                                                                                                                           | 27460 | 27470 | 27480 | 27490 | 27500 | 27510 | 27520 | 27530 | 27542       |
|                                              | SARS-CoV-2 NC_045512.2 (27141) AACACAGACCATTCCAGTAGCAGTGACAATATTGCTTTGCTTGTACAGTAAGTGACAACAGATGTTTCATCTCGTTGACTTTTCAGGTTACTATA  |       |       |       |       |       |       |       |       |             |
|                                              |                                                                                                                                 |       |       |       |       |       |       |       |       | Section 294 |
| Hepatitis B virus NC_003977.2 (27543) (3183) | 27543                                                                                                                           | 27550 | 27560 | 27570 | 27580 | 27590 | 27600 | 27610 | 27620 | 27636       |
|                                              | SARS-CoV-2 NC_045512.2 (27235) GCAGAGATATTACTAATTATTATGAGGACTTTTAAAGTTTCCATTTGGAATCTTGATTACATCATAAACCTCATAATTAAAAATTTATCTAAGT   |       |       |       |       |       |       |       |       |             |

## SARS-CoV-2 &amp; Hepatitis B.apr

|                                      |                                |                       |                       |                       |                       |                       |                       |                       |                       |                                             |
|--------------------------------------|--------------------------------|-----------------------|-----------------------|-----------------------|-----------------------|-----------------------|-----------------------|-----------------------|-----------------------|---------------------------------------------|
|                                      |                                |                       |                       |                       |                       |                       |                       |                       |                       | Section 295                                 |
| Hepatitis B virus NC_003977.2 (3183) | (27637)                        | <a href="#">27637</a> | <a href="#">27650</a> | <a href="#">27660</a> | <a href="#">27670</a> | <a href="#">27680</a> | <a href="#">27690</a> | <a href="#">27700</a> | <a href="#">27710</a> | <a href="#">27720</a> <a href="#">27730</a> |
|                                      | SARS-CoV-2 NC_045512.2 (27329) | -----                 |                       |                       |                       |                       |                       |                       |                       |                                             |
|                                      |                                |                       |                       |                       |                       |                       |                       |                       |                       | Section 296                                 |
| Hepatitis B virus NC_003977.2 (3183) | (27731)                        | <a href="#">27731</a> | <a href="#">27740</a> | <a href="#">27750</a> | <a href="#">27760</a> | <a href="#">27770</a> | <a href="#">27780</a> | <a href="#">27790</a> | <a href="#">27800</a> | <a href="#">27810</a> <a href="#">27824</a> |
|                                      | SARS-CoV-2 NC_045512.2 (27423) | -----                 |                       |                       |                       |                       |                       |                       |                       |                                             |
|                                      |                                |                       |                       |                       |                       |                       |                       |                       |                       | Section 297                                 |
| Hepatitis B virus NC_003977.2 (3183) | (27825)                        | <a href="#">27825</a> | <a href="#">27830</a> | <a href="#">27840</a> | <a href="#">27850</a> | <a href="#">27860</a> | <a href="#">27870</a> | <a href="#">27880</a> | <a href="#">27890</a> | <a href="#">27900</a> <a href="#">27918</a> |
|                                      | SARS-CoV-2 NC_045512.2 (27517) | -----                 |                       |                       |                       |                       |                       |                       |                       |                                             |
|                                      |                                |                       |                       |                       |                       |                       |                       |                       |                       | Section 298                                 |
| Hepatitis B virus NC_003977.2 (3183) | (27919)                        | <a href="#">27919</a> | <a href="#">27930</a> | <a href="#">27940</a> | <a href="#">27950</a> | <a href="#">27960</a> | <a href="#">27970</a> | <a href="#">27980</a> | <a href="#">27990</a> | <a href="#">28000</a> <a href="#">28012</a> |
|                                      | SARS-CoV-2 NC_045512.2 (27611) | -----                 |                       |                       |                       |                       |                       |                       |                       |                                             |
|                                      |                                |                       |                       |                       |                       |                       |                       |                       |                       | Section 299                                 |
| Hepatitis B virus NC_003977.2 (3183) | (28013)                        | <a href="#">28013</a> | <a href="#">28020</a> | <a href="#">28030</a> | <a href="#">28040</a> | <a href="#">28050</a> | <a href="#">28060</a> | <a href="#">28070</a> | <a href="#">28080</a> | <a href="#">28090</a> <a href="#">28106</a> |
|                                      | SARS-CoV-2 NC_045512.2 (27705) | -----                 |                       |                       |                       |                       |                       |                       |                       |                                             |
|                                      |                                |                       |                       |                       |                       |                       |                       |                       |                       | Section 300                                 |
| Hepatitis B virus NC_003977.2 (3183) | (28107)                        | <a href="#">28107</a> | <a href="#">28120</a> | <a href="#">28130</a> | <a href="#">28140</a> | <a href="#">28150</a> | <a href="#">28160</a> | <a href="#">28170</a> | <a href="#">28180</a> | <a href="#">28190</a> <a href="#">28200</a> |
|                                      | SARS-CoV-2 NC_045512.2 (27799) | -----                 |                       |                       |                       |                       |                       |                       |                       |                                             |
|                                      |                                |                       |                       |                       |                       |                       |                       |                       |                       | Section 301                                 |
| Hepatitis B virus NC_003977.2 (3183) | (28201)                        | <a href="#">28201</a> | <a href="#">28210</a> | <a href="#">28220</a> | <a href="#">28230</a> | <a href="#">28240</a> | <a href="#">28250</a> | <a href="#">28260</a> | <a href="#">28270</a> | <a href="#">28280</a> <a href="#">28294</a> |
|                                      | SARS-CoV-2 NC_045512.2 (27893) | -----                 |                       |                       |                       |                       |                       |                       |                       |                                             |

## SARS-CoV-2 &amp; Hepatitis B.apr

|                                                                                                 |         |                       |                       |                       |                       |                       |                       |                       |                       |                       |                       |
|-------------------------------------------------------------------------------------------------|---------|-----------------------|-----------------------|-----------------------|-----------------------|-----------------------|-----------------------|-----------------------|-----------------------|-----------------------|-----------------------|
|                                                                                                 |         |                       |                       |                       |                       |                       |                       |                       |                       |                       | Section 302           |
| Hepatitis B virus NC_003977.2<br>SARS-CoV-2 NC_045512.2                                         | (28295) | <a href="#">28295</a> | <a href="#">28300</a> | <a href="#">28310</a> | <a href="#">28320</a> | <a href="#">28330</a> | <a href="#">28340</a> | <a href="#">28350</a> | <a href="#">28360</a> | <a href="#">28370</a> | <a href="#">28388</a> |
|                                                                                                 | (3183)  | -----                 |                       |                       |                       |                       |                       |                       |                       |                       |                       |
| GTAGTTGATGACCCGTGTCCTATTCAC TTCTATTCTAAATGGTATATTAGAGTAGGAGCTAGAAAATCAGCACCTTTAATTGAATTGTGCGTGG |         |                       |                       |                       |                       |                       |                       |                       |                       |                       |                       |
|                                                                                                 |         |                       |                       |                       |                       |                       |                       |                       |                       |                       | Section 303           |
| Hepatitis B virus NC_003977.2<br>SARS-CoV-2 NC_045512.2                                         | (28389) | <a href="#">28389</a> | <a href="#">28400</a> | <a href="#">28410</a> | <a href="#">28420</a> | <a href="#">28430</a> | <a href="#">28440</a> | <a href="#">28450</a> | <a href="#">28460</a> | <a href="#">28470</a> | <a href="#">28482</a> |
|                                                                                                 | (3183)  | -----                 |                       |                       |                       |                       |                       |                       |                       |                       |                       |
| ATGAGGCTGGTTCTAAATCACCCATTTCAGTACATCGATATCGGTAATTATACAGTTTCCTGTTTACCTTTTACAATTAATTGCCAGGAACCTAA |         |                       |                       |                       |                       |                       |                       |                       |                       |                       |                       |
|                                                                                                 |         |                       |                       |                       |                       |                       |                       |                       |                       |                       | Section 304           |
| Hepatitis B virus NC_003977.2<br>SARS-CoV-2 NC_045512.2                                         | (28483) | <a href="#">28483</a> | <a href="#">28490</a> | <a href="#">28500</a> | <a href="#">28510</a> | <a href="#">28520</a> | <a href="#">28530</a> | <a href="#">28540</a> | <a href="#">28550</a> | <a href="#">28560</a> | <a href="#">28576</a> |
|                                                                                                 | (3183)  | -----                 |                       |                       |                       |                       |                       |                       |                       |                       |                       |
| ATTGGGTAGTCTTGTAGTGC GTTGTTCTATGAAGACTTTTTAGAGTATCATGACGTTTCGTGTTGTTTTAGATTTTCATCTAAACGAACAAA   |         |                       |                       |                       |                       |                       |                       |                       |                       |                       |                       |
|                                                                                                 |         |                       |                       |                       |                       |                       |                       |                       |                       |                       | Section 305           |
| Hepatitis B virus NC_003977.2<br>SARS-CoV-2 NC_045512.2                                         | (28577) | <a href="#">28577</a> | <a href="#">28590</a> | <a href="#">28600</a> | <a href="#">28610</a> | <a href="#">28620</a> | <a href="#">28630</a> | <a href="#">28640</a> | <a href="#">28650</a> | <a href="#">28660</a> | <a href="#">28670</a> |
|                                                                                                 | (3183)  | -----                 |                       |                       |                       |                       |                       |                       |                       |                       |                       |
| CTAAATGTCTGATAATGGACCCCAAATCAGCGAAATGCACCCCGCATTACGTTTGGTGGACCCTCAGATTCAACTGGCAGTAACCAGAATGG    |         |                       |                       |                       |                       |                       |                       |                       |                       |                       |                       |
|                                                                                                 |         |                       |                       |                       |                       |                       |                       |                       |                       |                       | Section 306           |
| Hepatitis B virus NC_003977.2<br>SARS-CoV-2 NC_045512.2                                         | (28671) | <a href="#">28671</a> | <a href="#">28680</a> | <a href="#">28690</a> | <a href="#">28700</a> | <a href="#">28710</a> | <a href="#">28720</a> | <a href="#">28730</a> | <a href="#">28740</a> | <a href="#">28750</a> | <a href="#">28764</a> |
|                                                                                                 | (3183)  | -----                 |                       |                       |                       |                       |                       |                       |                       |                       |                       |
| AGAACGCAGTGGGGCGCGATCAAAACAACGTCGGCCCAAGGTTTACCCAATAATACTGCGTCTTGTTTCACCGCTCTCACTCAACATGGCAAG   |         |                       |                       |                       |                       |                       |                       |                       |                       |                       |                       |
|                                                                                                 |         |                       |                       |                       |                       |                       |                       |                       |                       |                       | Section 307           |
| Hepatitis B virus NC_003977.2<br>SARS-CoV-2 NC_045512.2                                         | (28765) | <a href="#">28765</a> | <a href="#">28770</a> | <a href="#">28780</a> | <a href="#">28790</a> | <a href="#">28800</a> | <a href="#">28810</a> | <a href="#">28820</a> | <a href="#">28830</a> | <a href="#">28840</a> | <a href="#">28858</a> |
|                                                                                                 | (3183)  | -----                 |                       |                       |                       |                       |                       |                       |                       |                       |                       |
| GAAGACCTTAAATTCCCTCGAGGACAAGGCGTTCCAATTAAACACCAATAGCAGTCCAGATGACCAAATTGGCTACTACCGAAGAGCTACCAGAC |         |                       |                       |                       |                       |                       |                       |                       |                       |                       |                       |
|                                                                                                 |         |                       |                       |                       |                       |                       |                       |                       |                       |                       | Section 308           |
| Hepatitis B virus NC_003977.2<br>SARS-CoV-2 NC_045512.2                                         | (28859) | <a href="#">28859</a> | <a href="#">28870</a> | <a href="#">28880</a> | <a href="#">28890</a> | <a href="#">28900</a> | <a href="#">28910</a> | <a href="#">28920</a> | <a href="#">28930</a> | <a href="#">28940</a> | <a href="#">28952</a> |
|                                                                                                 | (3183)  | -----                 |                       |                       |                       |                       |                       |                       |                       |                       |                       |
| GAATTTCGTGGTGGTGACGGTAAATGAAAGATCTCAGTCCAAGATGGTATTTCTACTACCTAGGAAGTGGGCCAGAAGCTGGACTTCCCTATGG  |         |                       |                       |                       |                       |                       |                       |                       |                       |                       |                       |

SARS-CoV-2 & Hepatitis B.apr

|                                                                                                 |         |       |       |       |       |       |       |       |       |       |             |
|-------------------------------------------------------------------------------------------------|---------|-------|-------|-------|-------|-------|-------|-------|-------|-------|-------------|
|                                                                                                 |         |       |       |       |       |       |       |       |       |       | Section 309 |
| Hepatitis B virus NC_003977.2<br>SARS-CoV-2 NC_045512.2                                         | (28953) | 28953 | 28960 | 28970 | 28980 | 28990 | 29000 | 29010 | 29020 | 29030 | 29046       |
|                                                                                                 | (3183)  | ----- |       |       |       |       |       |       |       |       |             |
| TGCTAACAAAGACGGCATCATATGGGTTGCAACTGAGGGAGCCTTGAATACACCAAAAGATCACATTGGCACCCGCAATCCTGCTAACAAATGCT |         |       |       |       |       |       |       |       |       |       |             |
|                                                                                                 |         |       |       |       |       |       |       |       |       |       | Section 310 |
| Hepatitis B virus NC_003977.2<br>SARS-CoV-2 NC_045512.2                                         | (29047) | 29047 | 29060 | 29070 | 29080 | 29090 | 29100 | 29110 | 29120 | 29130 | 29140       |
|                                                                                                 | (3183)  | ----- |       |       |       |       |       |       |       |       |             |
| GCAATCGTGCTACAACTTCCTCAAGGAACAACATTGCCAAAAGGCTTCTACGCAGAAGGGAGCAGAGGCGGCAGTCAAGCCTCTTCTCGTTCCT  |         |       |       |       |       |       |       |       |       |       |             |
|                                                                                                 |         |       |       |       |       |       |       |       |       |       | Section 311 |
| Hepatitis B virus NC_003977.2<br>SARS-CoV-2 NC_045512.2                                         | (29141) | 29141 | 29150 | 29160 | 29170 | 29180 | 29190 | 29200 | 29210 | 29220 | 29234       |
|                                                                                                 | (3183)  | ----- |       |       |       |       |       |       |       |       |             |
| CATCACGTAGTCGCAACAGTTCAAGAAATTCAACTCCAGGCAGCAGTAGGGGAACTTCTCCTGCTAGAATGGCTGGCAATGGCGGTGATGCTGC  |         |       |       |       |       |       |       |       |       |       |             |
|                                                                                                 |         |       |       |       |       |       |       |       |       |       | Section 312 |
| Hepatitis B virus NC_003977.2<br>SARS-CoV-2 NC_045512.2                                         | (29235) | 29235 | 29240 | 29250 | 29260 | 29270 | 29280 | 29290 | 29300 | 29310 | 29328       |
|                                                                                                 | (3183)  | ----- |       |       |       |       |       |       |       |       |             |
| TCTTGCTTTGCTGCTGCTTGACAGATTGAACCAGCTTGAGAGCAAAATGTCTGGTAAAGGCCAACACAACAAGGCCAAACTGTCACTAAGAAA   |         |       |       |       |       |       |       |       |       |       |             |
|                                                                                                 |         |       |       |       |       |       |       |       |       |       | Section 313 |
| Hepatitis B virus NC_003977.2<br>SARS-CoV-2 NC_045512.2                                         | (29329) | 29329 | 29340 | 29350 | 29360 | 29370 | 29380 | 29390 | 29400 | 29410 | 29422       |
|                                                                                                 | (3183)  | ----- |       |       |       |       |       |       |       |       |             |
| TCTGCTGCTGAGGCTTCTAAGAAGCCTCGGCAAAAACGTACTGCCACTAAAGCATACAATGTAACACAAGCTTTGCGCAGACGTGGTCCAGAAC  |         |       |       |       |       |       |       |       |       |       |             |
|                                                                                                 |         |       |       |       |       |       |       |       |       |       | Section 314 |
| Hepatitis B virus NC_003977.2<br>SARS-CoV-2 NC_045512.2                                         | (29423) | 29423 | 29430 | 29440 | 29450 | 29460 | 29470 | 29480 | 29490 | 29500 | 29516       |
|                                                                                                 | (3183)  | ----- |       |       |       |       |       |       |       |       |             |
| AAACCCAAGGAAATTTTGGGGACCAGGAACATAATCAGACAAGGAAGTATTACAAACATTGGCCGCAAATTGCACAATTTGCCCCCAGCGCTTC  |         |       |       |       |       |       |       |       |       |       |             |
|                                                                                                 |         |       |       |       |       |       |       |       |       |       | Section 315 |
| Hepatitis B virus NC_003977.2<br>SARS-CoV-2 NC_045512.2                                         | (29517) | 29517 | 29530 | 29540 | 29550 | 29560 | 29570 | 29580 | 29590 | 29600 | 29610       |
|                                                                                                 | (3183)  | ----- |       |       |       |       |       |       |       |       |             |
| AGCGTTCTTCGGAATGTCGCGCATTGGCATGGAAGTCACACCTTCGGGAACGTGGTTGACCTACACAGGTGCCATCAAATTGGATGACAAAGAT  |         |       |       |       |       |       |       |       |       |       |             |

SARS-CoV-2 & Hepatitis B.apr

|                                                         |         |              |              |              |              |              |              |              |              |              |              |
|---------------------------------------------------------|---------|--------------|--------------|--------------|--------------|--------------|--------------|--------------|--------------|--------------|--------------|
|                                                         |         |              |              |              |              |              |              |              |              |              | Section 316  |
| Hepatitis B virus NC_003977.2<br>SARS-CoV-2 NC_045512.2 | (29611) | <u>29611</u> | <u>29620</u> | <u>29630</u> | <u>29640</u> | <u>29650</u> | <u>29660</u> | <u>29670</u> | <u>29680</u> | <u>29690</u> | <u>29704</u> |
|                                                         | (3183)  | -----        |              |              |              |              |              |              |              |              |              |
|                                                         |         |              |              |              |              |              |              |              |              |              | Section 317  |
| Hepatitis B virus NC_003977.2<br>SARS-CoV-2 NC_045512.2 | (29705) | <u>29705</u> | <u>29710</u> | <u>29720</u> | <u>29730</u> | <u>29740</u> | <u>29750</u> | <u>29760</u> | <u>29770</u> | <u>29780</u> | <u>29798</u> |
|                                                         | (3183)  | -----        |              |              |              |              |              |              |              |              |              |
|                                                         |         |              |              |              |              |              |              |              |              |              | Section 318  |
| Hepatitis B virus NC_003977.2<br>SARS-CoV-2 NC_045512.2 | (29799) | <u>29799</u> | <u>29810</u> | <u>29820</u> | <u>29830</u> | <u>29840</u> | <u>29850</u> | <u>29860</u> | <u>29870</u> | <u>29880</u> | <u>29892</u> |
|                                                         | (3183)  | -----        |              |              |              |              |              |              |              |              |              |
|                                                         |         |              |              |              |              |              |              |              |              |              | Section 319  |
| Hepatitis B virus NC_003977.2<br>SARS-CoV-2 NC_045512.2 | (29893) | <u>29893</u> | <u>29900</u> | <u>29910</u> | <u>29920</u> | <u>29930</u> | <u>29940</u> | <u>29950</u> | <u>29960</u> | <u>29970</u> | <u>29986</u> |
|                                                         | (3183)  | -----        |              |              |              |              |              |              |              |              |              |
|                                                         |         |              |              |              |              |              |              |              |              |              | Section 320  |
| Hepatitis B virus NC_003977.2<br>SARS-CoV-2 NC_045512.2 | (29987) | <u>29987</u> | <u>30000</u> | <u>30010</u> | <u>30020</u> | <u>30030</u> | <u>30040</u> | <u>30050</u> | <u>30060</u> | <u>30070</u> | <u>30080</u> |
|                                                         | (3183)  | -----        |              |              |              |              |              |              |              |              |              |
|                                                         |         |              |              |              |              |              |              |              |              |              | Section 321  |
| Hepatitis B virus NC_003977.2<br>SARS-CoV-2 NC_045512.2 | (30081) | <u>30081</u> | <u>30090</u> | <u>30100</u> | <u>30110</u> | <u>30120</u> | <u>30130</u> | <u>30140</u> | <u>30150</u> | <u>30160</u> | <u>30174</u> |
|                                                         | (3183)  | -----        |              |              |              |              |              |              |              |              |              |
|                                                         |         |              |              |              |              |              |              |              |              |              | Section 322  |
| Hepatitis B virus NC_003977.2<br>SARS-CoV-2 NC_045512.2 | (30175) | <u>30175</u> | <u>30180</u> | <u>30190</u> | <u>30200</u> | <u>30211</u> |              |              |              |              |              |
|                                                         | (3183)  | -----        |              |              |              |              |              |              |              |              |              |
|                                                         |         |              |              |              |              |              |              |              |              |              |              |
|                                                         |         |              |              |              |              |              |              |              |              |              |              |
