# Supplementary material for: Ubiquitous Micro-Modular Homologies among Genomes from Viruses to Bacteria to Human Mitochondrial DNA: Platforms for Recombination during Evolution?
Source: MDPI journal article supplement (doi:10.3390/v14050885), 2022-04-24
Supplement: s1 [file s1]

SARS-CoV-2 + human DNA.apr

|                                                                              |       |           |             |        |        |     |        |     |        |      |     |     |       |     |    |        |     |    |     |      |      |    |     |     |      |      |     |    |      |    |   |   |   |   |   |    |    |    |    |     |    |    |   |   |   |    |   |    |   |   |   |   |   |   |   |   |   |   |   |   |   |   |   |   |   |   |   |   |   |   |   |   |   |   |   |   |   |   |   |   |   |   |   |   |   |   |   |   |   |   |   |   |   |   |   |   |   |   |   |   |   |   |   |   |   |   |   |   |   |   |   |   |   |   |   |   |   |   |   |   |   |   |   |   |   |   |   |   |   |   |   |   |   |   |   |   |   |   |   |   |   |   |   |   |   |   |   |   |   |   |   |   |   |   |   |   |   |   |   |   |   |   |   |   |   |   |   |   |   |   |   |   |   |   |   |   |   |   |   |   |   |   |   |   |   |   |   |   |   |   |   |   |   |   |   |   |   |   |   |   |   |   |   |   |   |   |   |   |   |   |   |   |   |   |   |   |   |   |   |   |   |   |   |   |   |   |   |   |   |   |   |   |   |   |   |   |   |   |   |   |   |   |   |   |   |   |   |   |   |   |   |   |   |   |   |   |   |   |   |   |   |   |   |   |   |   |   |   |   |   |   |   |   |   |   |   |   |   |   |   |   |   |   |   |   |   |   |   |   |   |   |   |   |   |   |   |   |   |   |   |   |   |   |   |   |   |   |   |   |   |   |   |   |   |   |   |   |   |   |   |   |   |   |   |   |   |   |   |   |   |   |   |   |   |   |   |   |   |   |   |   |   |   |   |   |   |   |   |   |   |   |   |   |   |   |   |   |   |   |   |   |   |   |   |   |   |   |   |   |   |   |   |   |   |   |   |   |   |   |   |   |   |   |   |   |   |   |   |   |   |   |   |   |   |   |   |   |   |   |   |   |   |   |   |   |   |   |   |   |   |   |   |   |   |   |   |   |   |   |   |   |   |   |   |   |   |   |   |   |   |   |   |   |   |   |   |   |   |   |   |   |   |   |   |   |   |   |   |   |   |   |   |   |   |   |   |   |   |   |   |   |   |   |   |   |   |   |   |   |   |   |   |   |   |   |   |   |   |   |   |   |   |   |   |   |   |   |   |   |   |   |   |   |   |   |   |   |   |   |   |   |   |   |   |   |   |   |   |   |   |   |   |   |   |   |   |   |   |   |   |   |   |   |   |   |   |   |   |   |   |   |   |   |   |   |   |   |   |   |   |   |   |   |   |   |   |   |   |   |   |   |   |   |   |   |   |   |   |   |   |   |   |   |   |   |   |   |   |   |   |   |   |   |   |   |   |   |   |   |   |   |   |   |   |   |   |   |   |   |   |   |   |   |   |   |   |   |   |   |   |   |   |   |   |   |   |   |   |   |   |   |   |   |   |   |   |   |   |   |   |   |   |   |   |   |   |   |   |   |   |   |   |   |   |   |   |   |   |   |   |   |   |   |   |   |   |   |   |   |   |   |   |   |   |   |   |   |   |   |   |   |   |   |   |   |   |   |   |   |   |   |   |   |   |   |   |   |   |   |   |   |   |   |   |   |   |   |   |   |   |   |   |   |   |   |   |   |   |   |   |   |   |   |   |   |   |   |   |   |   |   |   |   |   |   |   |   |   |   |   |   |   |   |   |   |   |   |   |   |   |   |   |   |   |   |   |   |   |   |   |   |   |   |   |   |   |   |   |   |   |   |   |   |   |   |   |   |   |   |   |   |   |   |   |   |   |   |   |   |   |   |   |   |   |   |   |   |   |   |   |   |   |   |   |   |   |   |   |   |   |   |   |   |   |   |   |   |   |   |   |   |   |   |   |   |   |   |   |   |   |   |   |   |   |   |   |   |   |   |   |   |   |   |   |   |   |   |   |   |   |   |   |   |   |   |   |   |   |   |   |   |   |   |   |   |   |   |   |   |   |   |   |   |   |   |   |   |   |   |   |   |   |   |   |   |   |   |   |   |   |   |   |   |   |   |   |   |   |   |   |   |   |   |   |   |   |   |   |   |   |   |   |   |   |   |   |   |   |   |   |   |   |   |   |   |   |   |   |   |   |   |   |   |   |   |   |   |   |   |   |   |   |   |   |   |   |   |   |   |   |   |   |   |   |   |   |   |   |   |   |   |   |   |   |   |   |   |   |   |   |   |   |   |   |   |   |   |   |   |   |   |   |   |   |   |   |   |   |   |   |   |   |   |   |   |   |   |   |   |   |   |   |   |   |   |   |   |   |   |   |   |   |   |   |   |   |   |   |   |   |   |   |   |   |   |   |   |   |   |   |
|------------------------------------------------------------------------------|-------|-----------|-------------|--------|--------|-----|--------|-----|--------|------|-----|-----|-------|-----|----|--------|-----|----|-----|------|------|----|-----|-----|------|------|-----|----|------|----|---|---|---|---|---|----|----|----|----|-----|----|----|---|---|---|----|---|----|---|---|---|---|---|---|---|---|---|---|---|---|---|---|---|---|---|---|---|---|---|---|---|---|---|---|---|---|---|---|---|---|---|---|---|---|---|---|---|---|---|---|---|---|---|---|---|---|---|---|---|---|---|---|---|---|---|---|---|---|---|---|---|---|---|---|---|---|---|---|---|---|---|---|---|---|---|---|---|---|---|---|---|---|---|---|---|---|---|---|---|---|---|---|---|---|---|---|---|---|---|---|---|---|---|---|---|---|---|---|---|---|---|---|---|---|---|---|---|---|---|---|---|---|---|---|---|---|---|---|---|---|---|---|---|---|---|---|---|---|---|---|---|---|---|---|---|---|---|---|---|---|---|---|---|---|---|---|---|---|---|---|---|---|---|---|---|---|---|---|---|---|---|---|---|---|---|---|---|---|---|---|---|---|---|---|---|---|---|---|---|---|---|---|---|---|---|---|---|---|---|---|---|---|---|---|---|---|---|---|---|---|---|---|---|---|---|---|---|---|---|---|---|---|---|---|---|---|---|---|---|---|---|---|---|---|---|---|---|---|---|---|---|---|---|---|---|---|---|---|---|---|---|---|---|---|---|---|---|---|---|---|---|---|---|---|---|---|---|---|---|---|---|---|---|---|---|---|---|---|---|---|---|---|---|---|---|---|---|---|---|---|---|---|---|---|---|---|---|---|---|---|---|---|---|---|---|---|---|---|---|---|---|---|---|---|---|---|---|---|---|---|---|---|---|---|---|---|---|---|---|---|---|---|---|---|---|---|---|---|---|---|---|---|---|---|---|---|---|---|---|---|---|---|---|---|---|---|---|---|---|---|---|---|---|---|---|---|---|---|---|---|---|---|---|---|---|---|---|---|---|---|---|---|---|---|---|---|---|---|---|---|---|---|---|---|---|---|---|---|---|---|---|---|---|---|---|---|---|---|---|---|---|---|---|---|---|---|---|---|---|---|---|---|---|---|---|---|---|---|---|---|---|---|---|---|---|---|---|---|---|---|---|---|---|---|---|---|---|---|---|---|---|---|---|---|---|---|---|---|---|---|---|---|---|---|---|---|---|---|---|---|---|---|---|---|---|---|---|---|---|---|---|---|---|---|---|---|---|---|---|---|---|---|---|---|---|---|---|---|---|---|---|---|---|---|---|---|---|---|---|---|---|---|---|---|---|---|---|---|---|---|---|---|---|---|---|---|---|---|---|---|---|---|---|---|---|---|---|---|---|---|---|---|---|---|---|---|---|---|---|---|---|---|---|---|---|---|---|---|---|---|---|---|---|---|---|---|---|---|---|---|---|---|---|---|---|---|---|---|---|---|---|---|---|---|---|---|---|---|---|---|---|---|---|---|---|---|---|---|---|---|---|---|---|---|---|---|---|---|---|---|---|---|---|---|---|---|---|---|---|---|---|---|---|---|---|---|---|---|---|---|---|---|---|---|---|---|---|---|---|---|---|---|---|---|---|---|---|---|---|---|---|---|---|---|---|---|---|---|---|---|---|---|---|---|---|---|---|---|---|---|---|---|---|---|---|---|---|---|---|---|---|---|---|---|---|---|---|---|---|---|---|---|---|---|---|---|---|---|---|---|---|---|---|---|---|---|---|---|---|---|---|---|---|---|---|---|---|---|---|---|---|---|---|---|---|---|---|---|---|---|---|---|---|---|---|---|---|---|---|---|---|---|---|---|---|---|---|---|---|---|---|---|---|---|---|---|---|---|---|---|---|---|---|---|---|---|---|---|---|---|---|---|---|---|---|---|---|---|---|---|---|---|---|---|---|---|---|---|---|---|---|---|---|---|---|---|---|---|---|---|---|---|---|---|---|---|---|---|---|---|---|---|---|---|---|---|---|---|---|---|---|---|---|---|---|---|---|---|---|---|---|---|---|---|---|---|---|---|---|---|---|---|---|---|---|---|---|---|---|---|---|---|---|---|---|---|---|---|---|---|---|---|---|---|---|---|---|---|---|---|---|---|---|---|---|---|---|---|---|---|---|---|---|---|---|---|---|---|---|---|---|---|---|---|---|---|---|---|---|---|---|---|---|---|---|---|---|---|---|---|---|---|---|---|---|---|---|---|---|---|---|---|---|---|---|---|---|---|---|---|---|---|---|---|---|---|---|---|---|---|---|---|---|---|---|---|---|---|---|---|---|---|---|---|---|---|---|---|---|---|
|                                                                              |       | Section 1 |             |        |        |     |        |     |        |      |     |     |       |     |    |        |     |    |     |      |      |    |     |     |      |      |     |    |      |    |   |   |   |   |   |    |    |    |    |     |    |    |   |   |   |    |   |    |   |   |   |   |   |   |   |   |   |   |   |   |   |   |   |   |   |   |   |   |   |   |   |   |   |   |   |   |   |   |   |   |   |   |   |   |   |   |   |   |   |   |   |   |   |   |   |   |   |   |   |   |   |   |   |   |   |   |   |   |   |   |   |   |   |   |   |   |   |   |   |   |   |   |   |   |   |   |   |   |   |   |   |   |   |   |   |   |   |   |   |   |   |   |   |   |   |   |   |   |   |   |   |   |   |   |   |   |   |   |   |   |   |   |   |   |   |   |   |   |   |   |   |   |   |   |   |   |   |   |   |   |   |   |   |   |   |   |   |   |   |   |   |   |   |   |   |   |   |   |   |   |   |   |   |   |   |   |   |   |   |   |   |   |   |   |   |   |   |   |   |   |   |   |   |   |   |   |   |   |   |   |   |   |   |   |   |   |   |   |   |   |   |   |   |   |   |   |   |   |   |   |   |   |   |   |   |   |   |   |   |   |   |   |   |   |   |   |   |   |   |   |   |   |   |   |   |   |   |   |   |   |   |   |   |   |   |   |   |   |   |   |   |   |   |   |   |   |   |   |   |   |   |   |   |   |   |   |   |   |   |   |   |   |   |   |   |   |   |   |   |   |   |   |   |   |   |   |   |   |   |   |   |   |   |   |   |   |   |   |   |   |   |   |   |   |   |   |   |   |   |   |   |   |   |   |   |   |   |   |   |   |   |   |   |   |   |   |   |   |   |   |   |   |   |   |   |   |   |   |   |   |   |   |   |   |   |   |   |   |   |   |   |   |   |   |   |   |   |   |   |   |   |   |   |   |   |   |   |   |   |   |   |   |   |   |   |   |   |   |   |   |   |   |   |   |   |   |   |   |   |   |   |   |   |   |   |   |   |   |   |   |   |   |   |   |   |   |   |   |   |   |   |   |   |   |   |   |   |   |   |   |   |   |   |   |   |   |   |   |   |   |   |   |   |   |   |   |   |   |   |   |   |   |   |   |   |   |   |   |   |   |   |   |   |   |   |   |   |   |   |   |   |   |   |   |   |   |   |   |   |   |   |   |   |   |   |   |   |   |   |   |   |   |   |   |   |   |   |   |   |   |   |   |   |   |   |   |   |   |   |   |   |   |   |   |   |   |   |   |   |   |   |   |   |   |   |   |   |   |   |   |   |   |   |   |   |   |   |   |   |   |   |   |   |   |   |   |   |   |   |   |   |   |   |   |   |   |   |   |   |   |   |   |   |   |   |   |   |   |   |   |   |   |   |   |   |   |   |   |   |   |   |   |   |   |   |   |   |   |   |   |   |   |   |   |   |   |   |   |   |   |   |   |   |   |   |   |   |   |   |   |   |   |   |   |   |   |   |   |   |   |   |   |   |   |   |   |   |   |   |   |   |   |   |   |   |   |   |   |   |   |   |   |   |   |   |   |   |   |   |   |   |   |   |   |   |   |   |   |   |   |   |   |   |   |   |   |   |   |   |   |   |   |   |   |   |   |   |   |   |   |   |   |   |   |   |   |   |   |   |   |   |   |   |   |   |   |   |   |   |   |   |   |   |   |   |   |   |   |   |   |   |   |   |   |   |   |   |   |   |   |   |   |   |   |   |   |   |   |   |   |   |   |   |   |   |   |   |   |   |   |   |   |   |   |   |   |   |   |   |   |   |   |   |   |   |   |   |   |   |   |   |   |   |   |   |   |   |   |   |   |   |   |   |   |   |   |   |   |   |   |   |   |   |   |   |   |   |   |   |   |   |   |   |   |   |   |   |   |   |   |   |   |   |   |   |   |   |   |   |   |   |   |   |   |   |   |   |   |   |   |   |   |   |   |   |   |   |   |   |   |   |   |   |   |   |   |   |   |   |   |   |   |   |   |   |   |   |   |   |   |   |   |   |   |   |   |   |   |   |   |   |   |   |   |   |   |   |   |   |   |   |   |   |   |   |   |   |   |   |   |   |   |   |   |   |   |   |   |   |   |   |   |   |   |   |   |   |   |   |   |   |   |   |   |   |   |   |   |   |   |   |   |   |   |   |   |   |   |   |   |   |   |   |   |   |   |   |   |   |   |   |   |   |   |   |   |   |   |   |   |   |   |   |   |   |   |   |   |   |   |   |   |   |   |   |   |   |   |   |   |   |   |   |   |   |   |   |   |   |   |   |   |   |   |   |   |   |   |   |   |
| SARS-CoV-2 Region 11168 - 29055 nt<br>Homo sapiens mitochondrion NC_012920.1 | (1)   | 1         | 10          | 20     | 30     | 40  | 50     | 60  | 70     | 85   |     |     |       |     |    |        |     |    |     |      |      |    |     |     |      |      |     |    |      |    |   |   |   |   |   |    |    |    |    |     |    |    |   |   |   |    |   |    |   |   |   |   |   |   |   |   |   |   |   |   |   |   |   |   |   |   |   |   |   |   |   |   |   |   |   |   |   |   |   |   |   |   |   |   |   |   |   |   |   |   |   |   |   |   |   |   |   |   |   |   |   |   |   |   |   |   |   |   |   |   |   |   |   |   |   |   |   |   |   |   |   |   |   |   |   |   |   |   |   |   |   |   |   |   |   |   |   |   |   |   |   |   |   |   |   |   |   |   |   |   |   |   |   |   |   |   |   |   |   |   |   |   |   |   |   |   |   |   |   |   |   |   |   |   |   |   |   |   |   |   |   |   |   |   |   |   |   |   |   |   |   |   |   |   |   |   |   |   |   |   |   |   |   |   |   |   |   |   |   |   |   |   |   |   |   |   |   |   |   |   |   |   |   |   |   |   |   |   |   |   |   |   |   |   |   |   |   |   |   |   |   |   |   |   |   |   |   |   |   |   |   |   |   |   |   |   |   |   |   |   |   |   |   |   |   |   |   |   |   |   |   |   |   |   |   |   |   |   |   |   |   |   |   |   |   |   |   |   |   |   |   |   |   |   |   |   |   |   |   |   |   |   |   |   |   |   |   |   |   |   |   |   |   |   |   |   |   |   |   |   |   |   |   |   |   |   |   |   |   |   |   |   |   |   |   |   |   |   |   |   |   |   |   |   |   |   |   |   |   |   |   |   |   |   |   |   |   |   |   |   |   |   |   |   |   |   |   |   |   |   |   |   |   |   |   |   |   |   |   |   |   |   |   |   |   |   |   |   |   |   |   |   |   |   |   |   |   |   |   |   |   |   |   |   |   |   |   |   |   |   |   |   |   |   |   |   |   |   |   |   |   |   |   |   |   |   |   |   |   |   |   |   |   |   |   |   |   |   |   |   |   |   |   |   |   |   |   |   |   |   |   |   |   |   |   |   |   |   |   |   |   |   |   |   |   |   |   |   |   |   |   |   |   |   |   |   |   |   |   |   |   |   |   |   |   |   |   |   |   |   |   |   |   |   |   |   |   |   |   |   |   |   |   |   |   |   |   |   |   |   |   |   |   |   |   |   |   |   |   |   |   |   |   |   |   |   |   |   |   |   |   |   |   |   |   |   |   |   |   |   |   |   |   |   |   |   |   |   |   |   |   |   |   |   |   |   |   |   |   |   |   |   |   |   |   |   |   |   |   |   |   |   |   |   |   |   |   |   |   |   |   |   |   |   |   |   |   |   |   |   |   |   |   |   |   |   |   |   |   |   |   |   |   |   |   |   |   |   |   |   |   |   |   |   |   |   |   |   |   |   |   |   |   |   |   |   |   |   |   |   |   |   |   |   |   |   |   |   |   |   |   |   |   |   |   |   |   |   |   |   |   |   |   |   |   |   |   |   |   |   |   |   |   |   |   |   |   |   |   |   |   |   |   |   |   |   |   |   |   |   |   |   |   |   |   |   |   |   |   |   |   |   |   |   |   |   |   |   |   |   |   |   |   |   |   |   |   |   |   |   |   |   |   |   |   |   |   |   |   |   |   |   |   |   |   |   |   |   |   |   |   |   |   |   |   |   |   |   |   |   |   |   |   |   |   |   |   |   |   |   |   |   |   |   |   |   |   |   |   |   |   |   |   |   |   |   |   |   |   |   |   |   |   |   |   |   |   |   |   |   |   |   |   |   |   |   |   |   |   |   |   |   |   |   |   |   |   |   |   |   |   |   |   |   |   |   |   |   |   |   |   |   |   |   |   |   |   |   |   |   |   |   |   |   |   |   |   |   |   |   |   |   |   |   |   |   |   |   |   |   |   |   |   |   |   |   |   |   |   |   |   |   |   |   |   |   |   |   |   |   |   |   |   |   |   |   |   |   |   |   |   |   |   |   |   |   |   |   |   |   |   |   |   |   |   |   |   |   |   |   |   |   |   |   |   |   |   |   |   |   |   |   |   |   |   |   |   |   |   |   |   |   |   |   |   |   |   |   |   |   |   |   |   |   |   |   |   |   |   |   |   |   |   |   |   |   |   |   |   |   |   |   |   |   |   |   |   |   |   |   |   |   |   |   |   |   |   |   |   |   |   |   |   |   |   |   |   |   |   |   |   |   |   |   |   |   |   |   |   |   |   |   |   |   |   |   |   |   |   |   |   |   |   |   |   |   |   |   |   |   |   |   |   |   |   |   |   |   |   |   |
|                                                                              | (1)   | TT        | TCTCTGTTTGT | TTTTGT | TA     | CC  | TTCTCT | TG  | CACTGT | AGCT | -T  | ATT | T     | TA  | AT | TGGTCT | TAT | AT | GC  | CTG  | CTAG | TT | GGG | TG  | ATGC | GT   |     |    |      |    |   |   |   |   |   |    |    |    |    |     |    |    |   |   |   |    |   |    |   |   |   |   |   |   |   |   |   |   |   |   |   |   |   |   |   |   |   |   |   |   |   |   |   |   |   |   |   |   |   |   |   |   |   |   |   |   |   |   |   |   |   |   |   |   |   |   |   |   |   |   |   |   |   |   |   |   |   |   |   |   |   |   |   |   |   |   |   |   |   |   |   |   |   |   |   |   |   |   |   |   |   |   |   |   |   |   |   |   |   |   |   |   |   |   |   |   |   |   |   |   |   |   |   |   |   |   |   |   |   |   |   |   |   |   |   |   |   |   |   |   |   |   |   |   |   |   |   |   |   |   |   |   |   |   |   |   |   |   |   |   |   |   |   |   |   |   |   |   |   |   |   |   |   |   |   |   |   |   |   |   |   |   |   |   |   |   |   |   |   |   |   |   |   |   |   |   |   |   |   |   |   |   |   |   |   |   |   |   |   |   |   |   |   |   |   |   |   |   |   |   |   |   |   |   |   |   |   |   |   |   |   |   |   |   |   |   |   |   |   |   |   |   |   |   |   |   |   |   |   |   |   |   |   |   |   |   |   |   |   |   |   |   |   |   |   |   |   |   |   |   |   |   |   |   |   |   |   |   |   |   |   |   |   |   |   |   |   |   |   |   |   |   |   |   |   |   |   |   |   |   |   |   |   |   |   |   |   |   |   |   |   |   |   |   |   |   |   |   |   |   |   |   |   |   |   |   |   |   |   |   |   |   |   |   |   |   |   |   |   |   |   |   |   |   |   |   |   |   |   |   |   |   |   |   |   |   |   |   |   |   |   |   |   |   |   |   |   |   |   |   |   |   |   |   |   |   |   |   |   |   |   |   |   |   |   |   |   |   |   |   |   |   |   |   |   |   |   |   |   |   |   |   |   |   |   |   |   |   |   |   |   |   |   |   |   |   |   |   |   |   |   |   |   |   |   |   |   |   |   |   |   |   |   |   |   |   |   |   |   |   |   |   |   |   |   |   |   |   |   |   |   |   |   |   |   |   |   |   |   |   |   |   |   |   |   |   |   |   |   |   |   |   |   |   |   |   |   |   |   |   |   |   |   |   |   |   |   |   |   |   |   |   |   |   |   |   |   |   |   |   |   |   |   |   |   |   |   |   |   |   |   |   |   |   |   |   |   |   |   |   |   |   |   |   |   |   |   |   |   |   |   |   |   |   |   |   |   |   |   |   |   |   |   |   |   |   |   |   |   |   |   |   |   |   |   |   |   |   |   |   |   |   |   |   |   |   |   |   |   |   |   |   |   |   |   |   |   |   |   |   |   |   |   |   |   |   |   |   |   |   |   |   |   |   |   |   |   |   |   |   |   |   |   |   |   |   |   |   |   |   |   |   |   |   |   |   |   |   |   |   |   |   |   |   |   |   |   |   |   |   |   |   |   |   |   |   |   |   |   |   |   |   |   |   |   |   |   |   |   |   |   |   |   |   |   |   |   |   |   |   |   |   |   |   |   |   |   |   |   |   |   |   |   |   |   |   |   |   |   |   |   |   |   |   |   |   |   |   |   |   |   |   |   |   |   |   |   |   |   |   |   |   |   |   |   |   |   |   |   |   |   |   |   |   |   |   |   |   |   |   |   |   |   |   |   |   |   |   |   |   |   |   |   |   |   |   |   |   |   |   |   |   |   |   |   |   |   |   |   |   |   |   |   |   |   |   |   |   |   |   |   |   |   |   |   |   |   |   |   |   |   |   |   |   |   |   |   |   |   |   |   |   |   |   |   |   |   |   |   |   |   |   |   |   |   |   |   |   |   |   |   |   |   |   |   |   |   |   |   |   |   |   |   |   |   |   |   |   |   |   |   |   |   |   |   |   |   |   |   |   |   |   |   |   |   |   |   |   |   |   |   |   |   |   |   |   |   |   |   |   |   |   |   |   |   |   |   |   |   |   |   |   |   |   |   |   |   |   |   |   |   |   |   |   |   |   |   |   |   |   |   |   |   |   |   |   |   |   |   |   |   |   |   |   |   |   |   |   |   |   |   |   |   |   |   |   |   |   |   |   |   |   |   |   |   |   |   |   |   |   |   |   |   |   |   |   |   |   |   |   |   |   |   |   |   |   |   |   |   |   |   |   |   |   |   |   |   |   |   |   |   |   |   |   |   |   |   |   |   |   |   |   |   |   |   |   |   |   |   |   |   |   |   |   |   |   |   |   |   |   |
|                                                                              | (1)   | GA        | TCACAGG     | TCTA   | TCACCC | TA  | --     | TTA | AC     | CACT | CAC | GG  | GAGCT | C   | T  | CCA    | T   | GC | ATT | TGGT | AT   | TT | T   | CTG | G    | ---- | GGG | GT | ATGC | AC |   |   |   |   |   |    |    |    |    |     |    |    |   |   |   |    |   |    |   |   |   |   |   |   |   |   |   |   |   |   |   |   |   |   |   |   |   |   |   |   |   |   |   |   |   |   |   |   |   |   |   |   |   |   |   |   |   |   |   |   |   |   |   |   |   |   |   |   |   |   |   |   |   |   |   |   |   |   |   |   |   |   |   |   |   |   |   |   |   |   |   |   |   |   |   |   |   |   |   |   |   |   |   |   |   |   |   |   |   |   |   |   |   |   |   |   |   |   |   |   |   |   |   |   |   |   |   |   |   |   |   |   |   |   |   |   |   |   |   |   |   |   |   |   |   |   |   |   |   |   |   |   |   |   |   |   |   |   |   |   |   |   |   |   |   |   |   |   |   |   |   |   |   |   |   |   |   |   |   |   |   |   |   |   |   |   |   |   |   |   |   |   |   |   |   |   |   |   |   |   |   |   |   |   |   |   |   |   |   |   |   |   |   |   |   |   |   |   |   |   |   |   |   |   |   |   |   |   |   |   |   |   |   |   |   |   |   |   |   |   |   |   |   |   |   |   |   |   |   |   |   |   |   |   |   |   |   |   |   |   |   |   |   |   |   |   |   |   |   |   |   |   |   |   |   |   |   |   |   |   |   |   |   |   |   |   |   |   |   |   |   |   |   |   |   |   |   |   |   |   |   |   |   |   |   |   |   |   |   |   |   |   |   |   |   |   |   |   |   |   |   |   |   |   |   |   |   |   |   |   |   |   |   |   |   |   |   |   |   |   |   |   |   |   |   |   |   |   |   |   |   |   |   |   |   |   |   |   |   |   |   |   |   |   |   |   |   |   |   |   |   |   |   |   |   |   |   |   |   |   |   |   |   |   |   |   |   |   |   |   |   |   |   |   |   |   |   |   |   |   |   |   |   |   |   |   |   |   |   |   |   |   |   |   |   |   |   |   |   |   |   |   |   |   |   |   |   |   |   |   |   |   |   |   |   |   |   |   |   |   |   |   |   |   |   |   |   |   |   |   |   |   |   |   |   |   |   |   |   |   |   |   |   |   |   |   |   |   |   |   |   |   |   |   |   |   |   |   |   |   |   |   |   |   |   |   |   |   |   |   |   |   |   |   |   |   |   |   |   |   |   |   |   |   |   |   |   |   |   |   |   |   |   |   |   |   |   |   |   |   |   |   |   |   |   |   |   |   |   |   |   |   |   |   |   |   |   |   |   |   |   |   |   |   |   |   |   |   |   |   |   |   |   |   |   |   |   |   |   |   |   |   |   |   |   |   |   |   |   |   |   |   |   |   |   |   |   |   |   |   |   |   |   |   |   |   |   |   |   |   |   |   |   |   |   |   |   |   |   |   |   |   |   |   |   |   |   |   |   |   |   |   |   |   |   |   |   |   |   |   |   |   |   |   |   |   |   |   |   |   |   |   |   |   |   |   |   |   |   |   |   |   |   |   |   |   |   |   |   |   |   |   |   |   |   |   |   |   |   |   |   |   |   |   |   |   |   |   |   |   |   |   |   |   |   |   |   |   |   |   |   |   |   |   |   |   |   |   |   |   |   |   |   |   |   |   |   |   |   |   |   |   |   |   |   |   |   |   |   |   |   |   |   |   |   |   |   |   |   |   |   |   |   |   |   |   |   |   |   |   |   |   |   |   |   |   |   |   |   |   |   |   |   |   |   |   |   |   |   |   |   |   |   |   |   |   |   |   |   |   |   |   |   |   |   |   |   |   |   |   |   |   |   |   |   |   |   |   |   |   |   |   |   |   |   |   |   |   |   |   |   |   |   |   |   |   |   |   |   |   |   |   |   |   |   |   |   |   |   |   |   |   |   |   |   |   |   |   |   |   |   |   |   |   |   |   |   |   |   |   |   |   |   |   |   |   |   |   |   |   |   |   |   |   |   |   |   |   |   |   |   |   |   |   |   |   |   |   |   |   |   |   |   |   |   |   |   |   |   |   |   |   |   |   |   |   |   |   |   |   |   |   |   |   |   |   |   |   |   |   |   |   |   |   |   |   |   |   |   |   |   |   |   |   |   |   |   |   |   |   |   |   |   |   |   |   |   |   |   |   |   |   |   |   |   |   |   |   |   |   |   |   |   |   |   |   |   |   |   |   |   |   |   |   |   |   |   |   |   |   |   |   |   |   |   |   |   |   |   |   |   |   |   |   |   |   |   |   |   |   |   |   |   |   |   |   |   |   |   |   |
|                                                                              |       | Section 2 |             |        |        |     |        |     |        |      |     |     |       |     |    |        |     |    |     |      |      |    |     |     |      |      |     |    |      |    |   |   |   |   |   |    |    |    |    |     |    |    |   |   |   |    |   |    |   |   |   |   |   |   |   |   |   |   |   |   |   |   |   |   |   |   |   |   |   |   |   |   |   |   |   |   |   |   |   |   |   |   |   |   |   |   |   |   |   |   |   |   |   |   |   |   |   |   |   |   |   |   |   |   |   |   |   |   |   |   |   |   |   |   |   |   |   |   |   |   |   |   |   |   |   |   |   |   |   |   |   |   |   |   |   |   |   |   |   |   |   |   |   |   |   |   |   |   |   |   |   |   |   |   |   |   |   |   |   |   |   |   |   |   |   |   |   |   |   |   |   |   |   |   |   |   |   |   |   |   |   |   |   |   |   |   |   |   |   |   |   |   |   |   |   |   |   |   |   |   |   |   |   |   |   |   |   |   |   |   |   |   |   |   |   |   |   |   |   |   |   |   |   |   |   |   |   |   |   |   |   |   |   |   |   |   |   |   |   |   |   |   |   |   |   |   |   |   |   |   |   |   |   |   |   |   |   |   |   |   |   |   |   |   |   |   |   |   |   |   |   |   |   |   |   |   |   |   |   |   |   |   |   |   |   |   |   |   |   |   |   |   |   |   |   |   |   |   |   |   |   |   |   |   |   |   |   |   |   |   |   |   |   |   |   |   |   |   |   |   |   |   |   |   |   |   |   |   |   |   |   |   |   |   |   |   |   |   |   |   |   |   |   |   |   |   |   |   |   |   |   |   |   |   |   |   |   |   |   |   |   |   |   |   |   |   |   |   |   |   |   |   |   |   |   |   |   |   |   |   |   |   |   |   |   |   |   |   |   |   |   |   |   |   |   |   |   |   |   |   |   |   |   |   |   |   |   |   |   |   |   |   |   |   |   |   |   |   |   |   |   |   |   |   |   |   |   |   |   |   |   |   |   |   |   |   |   |   |   |   |   |   |   |   |   |   |   |   |   |   |   |   |   |   |   |   |   |   |   |   |   |   |   |   |   |   |   |   |   |   |   |   |   |   |   |   |   |   |   |   |   |   |   |   |   |   |   |   |   |   |   |   |   |   |   |   |   |   |   |   |   |   |   |   |   |   |   |   |   |   |   |   |   |   |   |   |   |   |   |   |   |   |   |   |   |   |   |   |   |   |   |   |   |   |   |   |   |   |   |   |   |   |   |   |   |   |   |   |   |   |   |   |   |   |   |   |   |   |   |   |   |   |   |   |   |   |   |   |   |   |   |   |   |   |   |   |   |   |   |   |   |   |   |   |   |   |   |   |   |   |   |   |   |   |   |   |   |   |   |   |   |   |   |   |   |   |   |   |   |   |   |   |   |   |   |   |   |   |   |   |   |   |   |   |   |   |   |   |   |   |   |   |   |   |   |   |   |   |   |   |   |   |   |   |   |   |   |   |   |   |   |   |   |   |   |   |   |   |   |   |   |   |   |   |   |   |   |   |   |   |   |   |   |   |   |   |   |   |   |   |   |   |   |   |   |   |   |   |   |   |   |   |   |   |   |   |   |   |   |   |   |   |   |   |   |   |   |   |   |   |   |   |   |   |   |   |   |   |   |   |   |   |   |   |   |   |   |   |   |   |   |   |   |   |   |   |   |   |   |   |   |   |   |   |   |   |   |   |   |   |   |   |   |   |   |   |   |   |   |   |   |   |   |   |   |   |   |   |   |   |   |   |   |   |   |   |   |   |   |   |   |   |   |   |   |   |   |   |   |   |   |   |   |   |   |   |   |   |   |   |   |   |   |   |   |   |   |   |   |   |   |   |   |   |   |   |   |   |   |   |   |   |   |   |   |   |   |   |   |   |   |   |   |   |   |   |   |   |   |   |   |   |   |   |   |   |   |   |   |   |   |   |   |   |   |   |   |   |   |   |   |   |   |   |   |   |   |   |   |   |   |   |   |   |   |   |   |   |   |   |   |   |   |   |   |   |   |   |   |   |   |   |   |   |   |   |   |   |   |   |   |   |   |   |   |   |   |   |   |   |   |   |   |   |   |   |   |   |   |   |   |   |   |   |   |   |   |   |   |   |   |   |   |   |   |   |   |   |   |   |   |   |   |   |   |   |   |   |   |   |   |   |   |   |   |   |   |   |   |   |   |   |   |   |   |   |   |   |   |   |   |   |   |   |   |   |   |   |   |   |   |   |   |   |   |   |   |   |   |   |   |   |   |   |   |   |   |   |   |   |   |   |   |   |   |   |   |   |   |   |
| SARS-CoV-2 Region 11168 - 29055 nt<br>Homo sapiens mitochondrion NC_012920.1 | (86)  | 86        | 100         | 110    | 120    | 130 | 140    | 150 | 160    | 170  |     |     |       |     |    |        |     |    |     |      |      |    |     |     |      |      |     |    |      |    |   |   |   |   |   |    |    |    |    |     |    |    |   |   |   |    |   |    |   |   |   |   |   |   |   |   |   |   |   |   |   |   |   |   |   |   |   |   |   |   |   |   |   |   |   |   |   |   |   |   |   |   |   |   |   |   |   |   |   |   |   |   |   |   |   |   |   |   |   |   |   |   |   |   |   |   |   |   |   |   |   |   |   |   |   |   |   |   |   |   |   |   |   |   |   |   |   |   |   |   |   |   |   |   |   |   |   |   |   |   |   |   |   |   |   |   |   |   |   |   |   |   |   |   |   |   |   |   |   |   |   |   |   |   |   |   |   |   |   |   |   |   |   |   |   |   |   |   |   |   |   |   |   |   |   |   |   |   |   |   |   |   |   |   |   |   |   |   |   |   |   |   |   |   |   |   |   |   |   |   |   |   |   |   |   |   |   |   |   |   |   |   |   |   |   |   |   |   |   |   |   |   |   |   |   |   |   |   |   |   |   |   |   |   |   |   |   |   |   |   |   |   |   |   |   |   |   |   |   |   |   |   |   |   |   |   |   |   |   |   |   |   |   |   |   |   |   |   |   |   |   |   |   |   |   |   |   |   |   |   |   |   |   |   |   |   |   |   |   |   |   |   |   |   |   |   |   |   |   |   |   |   |   |   |   |   |   |   |   |   |   |   |   |   |   |   |   |   |   |   |   |   |   |   |   |   |   |   |   |   |   |   |   |   |   |   |   |   |   |   |   |   |   |   |   |   |   |   |   |   |   |   |   |   |   |   |   |   |   |   |   |   |   |   |   |   |   |   |   |   |   |   |   |   |   |   |   |   |   |   |   |   |   |   |   |   |   |   |   |   |   |   |   |   |   |   |   |   |   |   |   |   |   |   |   |   |   |   |   |   |   |   |   |   |   |   |   |   |   |   |   |   |   |   |   |   |   |   |   |   |   |   |   |   |   |   |   |   |   |   |   |   |   |   |   |   |   |   |   |   |   |   |   |   |   |   |   |   |   |   |   |   |   |   |   |   |   |   |   |   |   |   |   |   |   |   |   |   |   |   |   |   |   |   |   |   |   |   |   |   |   |   |   |   |   |   |   |   |   |   |   |   |   |   |   |   |   |   |   |   |   |   |   |   |   |   |   |   |   |   |   |   |   |   |   |   |   |   |   |   |   |   |   |   |   |   |   |   |   |   |   |   |   |   |   |   |   |   |   |   |   |   |   |   |   |   |   |   |   |   |   |   |   |   |   |   |   |   |   |   |   |   |   |   |   |   |   |   |   |   |   |   |   |   |   |   |   |   |   |   |   |   |   |   |   |   |   |   |   |   |   |   |   |   |   |   |   |   |   |   |   |   |   |   |   |   |   |   |   |   |   |   |   |   |   |   |   |   |   |   |   |   |   |   |   |   |   |   |   |   |   |   |   |   |   |   |   |   |   |   |   |   |   |   |   |   |   |   |   |   |   |   |   |   |   |   |   |   |   |   |   |   |   |   |   |   |   |   |   |   |   |   |   |   |   |   |   |   |   |   |   |   |   |   |   |   |   |   |   |   |   |   |   |   |   |   |   |   |   |   |   |   |   |   |   |   |   |   |   |   |   |   |   |   |   |   |   |   |   |   |   |   |   |   |   |   |   |   |   |   |   |   |   |   |   |   |   |   |   |   |   |   |   |   |   |   |   |   |   |   |   |   |   |   |   |   |   |   |   |   |   |   |   |   |   |   |   |   |   |   |   |   |   |   |   |   |   |   |   |   |   |   |   |   |   |   |   |   |   |   |   |   |   |   |   |   |   |   |   |   |   |   |   |   |   |   |   |   |   |   |   |   |   |   |   |   |   |   |   |   |   |   |   |   |   |   |   |   |   |   |   |   |   |   |   |   |   |   |   |   |   |   |   |   |   |   |   |   |   |   |   |   |   |   |   |   |   |   |   |   |   |   |   |   |   |   |   |   |   |   |   |   |   |   |   |   |   |   |   |   |   |   |   |   |   |   |   |   |   |   |   |   |   |   |   |   |   |   |   |   |   |   |   |   |   |   |   |   |   |   |   |   |   |   |   |   |   |   |   |   |   |   |   |   |   |   |   |   |   |   |   |   |   |   |   |   |   |   |   |   |   |   |   |   |   |   |   |   |   |   |   |   |   |   |   |   |   |   |   |   |   |   |   |   |   |   |   |   |   |   |   |   |   |   |   |   |   |   |   |   |   |   |   |   |   |   |   |   |   |   |
|                                                                              | (85)  | ATT       | ATGA        | CAT    | G      | TTG | GAT    | AT  | GG     | T    | GAT | A   | C     | TAG | T  | T      | T   | G  | T   | CT   | GGT  | T  | T   | TA  | AG   | C    | T   | A  | A    | A  | A | G | A | C | T | G  | T  | GG | T  | GT  |    |    |   |   |   |    |   |    |   |   |   |   |   |   |   |   |   |   |   |   |   |   |   |   |   |   |   |   |   |   |   |   |   |   |   |   |   |   |   |   |   |   |   |   |   |   |   |   |   |   |   |   |   |   |   |   |   |   |   |   |   |   |   |   |   |   |   |   |   |   |   |   |   |   |   |   |   |   |   |   |   |   |   |   |   |   |   |   |   |   |   |   |   |   |   |   |   |   |   |   |   |   |   |   |   |   |   |   |   |   |   |   |   |   |   |   |   |   |   |   |   |   |   |   |   |   |   |   |   |   |   |   |   |   |   |   |   |   |   |   |   |   |   |   |   |   |   |   |   |   |   |   |   |   |   |   |   |   |   |   |   |   |   |   |   |   |   |   |   |   |   |   |   |   |   |   |   |   |   |   |   |   |   |   |   |   |   |   |   |   |   |   |   |   |   |   |   |   |   |   |   |   |   |   |   |   |   |   |   |   |   |   |   |   |   |   |   |   |   |   |   |   |   |   |   |   |   |   |   |   |   |   |   |   |   |   |   |   |   |   |   |   |   |   |   |   |   |   |   |   |   |   |   |   |   |   |   |   |   |   |   |   |   |   |   |   |   |   |   |   |   |   |   |   |   |   |   |   |   |   |   |   |   |   |   |   |   |   |   |   |   |   |   |   |   |   |   |   |   |   |   |   |   |   |   |   |   |   |   |   |   |   |   |   |   |   |   |   |   |   |   |   |   |   |   |   |   |   |   |   |   |   |   |   |   |   |   |   |   |   |   |   |   |   |   |   |   |   |   |   |   |   |   |   |   |   |   |   |   |   |   |   |   |   |   |   |   |   |   |   |   |   |   |   |   |   |   |   |   |   |   |   |   |   |   |   |   |   |   |   |   |   |   |   |   |   |   |   |   |   |   |   |   |   |   |   |   |   |   |   |   |   |   |   |   |   |   |   |   |   |   |   |   |   |   |   |   |   |   |   |   |   |   |   |   |   |   |   |   |   |   |   |   |   |   |   |   |   |   |   |   |   |   |   |   |   |   |   |   |   |   |   |   |   |   |   |   |   |   |   |   |   |   |   |   |   |   |   |   |   |   |   |   |   |   |   |   |   |   |   |   |   |   |   |   |   |   |   |   |   |   |   |   |   |   |   |   |   |   |   |   |   |   |   |   |   |   |   |   |   |   |   |   |   |   |   |   |   |   |   |   |   |   |   |   |   |   |   |   |   |   |   |   |   |   |   |   |   |   |   |   |   |   |   |   |   |   |   |   |   |   |   |   |   |   |   |   |   |   |   |   |   |   |   |   |   |   |   |   |   |   |   |   |   |   |   |   |   |   |   |   |   |   |   |   |   |   |   |   |   |   |   |   |   |   |   |   |   |   |   |   |   |   |   |   |   |   |   |   |   |   |   |   |   |   |   |   |   |   |   |   |   |   |   |   |   |   |   |   |   |   |   |   |   |   |   |   |   |   |   |   |   |   |   |   |   |   |   |   |   |   |   |   |   |   |   |   |   |   |   |   |   |   |   |   |   |   |   |   |   |   |   |   |   |   |   |   |   |   |   |   |   |   |   |   |   |   |   |   |   |   |   |   |   |   |   |   |   |   |   |   |   |   |   |   |   |   |   |   |   |   |   |   |   |   |   |   |   |   |   |   |   |   |   |   |   |   |   |   |   |   |   |   |   |   |   |   |   |   |   |   |   |   |   |   |   |   |   |   |   |   |   |   |   |   |   |   |   |   |   |   |   |   |   |   |   |   |   |   |   |   |   |   |   |   |   |   |   |   |   |   |   |   |   |   |   |   |   |   |   |   |   |   |   |   |   |   |   |   |   |   |   |   |   |   |   |   |   |   |   |   |   |   |   |   |   |   |   |   |   |   |   |   |   |   |   |   |   |   |   |   |   |   |   |   |   |   |   |   |   |   |   |   |   |   |   |   |   |   |   |   |   |   |   |   |   |   |   |   |   |   |   |   |   |   |   |   |   |   |   |   |   |   |   |   |   |   |   |   |   |   |   |   |   |   |   |   |   |   |   |   |   |   |   |   |   |   |   |   |   |   |   |   |   |   |   |   |   |   |   |   |   |   |   |   |   |   |   |   |   |   |   |   |   |   |   |   |   |   |   |   |   |   |   |   |   |   |   |   |   |   |   |   |   |   |   |   |   |   |   |   |   |   |   |   |   |   |   |   |   |
|                                                                              | (79)  | GCG       | ATAG        | CAT    | T      | GC  | --     | GAG | AC     | GC   | T   | G   | AG    | CC  | C  | G      | G   | AG | C   | ACC  | CT   | AT | G   | T   | CG   | C    | AG  | -  | T    | AT | C | T | G | T | G | -- | AT | T  | CC | TGC | TC | AT | C | - | T | AT | T | AT |   |   |   |   |   |   |   |   |   |   |   |   |   |   |   |   |   |   |   |   |   |   |   |   |   |   |   |   |   |   |   |   |   |   |   |   |   |   |   |   |   |   |   |   |   |   |   |   |   |   |   |   |   |   |   |   |   |   |   |   |   |   |   |   |   |   |   |   |   |   |   |   |   |   |   |   |   |   |   |   |   |   |   |   |   |   |   |   |   |   |   |   |   |   |   |   |   |   |   |   |   |   |   |   |   |   |   |   |   |   |   |   |   |   |   |   |   |   |   |   |   |   |   |   |   |   |   |   |   |   |   |   |   |   |   |   |   |   |   |   |   |   |   |   |   |   |   |   |   |   |   |   |   |   |   |   |   |   |   |   |   |   |   |   |   |   |   |   |   |   |   |   |   |   |   |   |   |   |   |   |   |   |   |   |   |   |   |   |   |   |   |   |   |   |   |   |   |   |   |   |   |   |   |   |   |   |   |   |   |   |   |   |   |   |   |   |   |   |   |   |   |   |   |   |   |   |   |   |   |   |   |   |   |   |   |   |   |   |   |   |   |   |   |   |   |   |   |   |   |   |   |   |   |   |   |   |   |   |   |   |   |   |   |   |   |   |   |   |   |   |   |   |   |   |   |   |   |   |   |   |   |   |   |   |   |   |   |   |   |   |   |   |   |   |   |   |   |   |   |   |   |   |   |   |   |   |   |   |   |   |   |   |   |   |   |   |   |   |   |   |   |   |   |   |   |   |   |   |   |   |   |   |   |   |   |   |   |   |   |   |   |   |   |   |   |   |   |   |   |   |   |   |   |   |   |   |   |   |   |   |   |   |   |   |   |   |   |   |   |   |   |   |   |   |   |   |   |   |   |   |   |   |   |   |   |   |   |   |   |   |   |   |   |   |   |   |   |   |   |   |   |   |   |   |   |   |   |   |   |   |   |   |   |   |   |   |   |   |   |   |   |   |   |   |   |   |   |   |   |   |   |   |   |   |   |   |   |   |   |   |   |   |   |   |   |   |   |   |   |   |   |   |   |   |   |   |   |   |   |   |   |   |   |   |   |   |   |   |   |   |   |   |   |   |   |   |   |   |   |   |   |   |   |   |   |   |   |   |   |   |   |   |   |   |   |   |   |   |   |   |   |   |   |   |   |   |   |   |   |   |   |   |   |   |   |   |   |   |   |   |   |   |   |   |   |   |   |   |   |   |   |   |   |   |   |   |   |   |   |   |   |   |   |   |   |   |   |   |   |   |   |   |   |   |   |   |   |   |   |   |   |   |   |   |   |   |   |   |   |   |   |   |   |   |   |   |   |   |   |   |   |   |   |   |   |   |   |   |   |   |   |   |   |   |   |   |   |   |   |   |   |   |   |   |   |   |   |   |   |   |   |   |   |   |   |   |   |   |   |   |   |   |   |   |   |   |   |   |   |   |   |   |   |   |   |   |   |   |   |   |   |   |   |   |   |   |   |   |   |   |   |   |   |   |   |   |   |   |   |   |   |   |   |   |   |   |   |   |   |   |   |   |   |   |   |   |   |   |   |   |   |   |   |   |   |   |   |   |   |   |   |   |   |   |   |   |   |   |   |   |   |   |   |   |   |   |   |   |   |   |   |   |   |   |   |   |   |   |   |   |   |   |   |   |   |   |   |   |   |   |   |   |   |   |   |   |   |   |   |   |   |   |   |   |   |   |   |   |   |   |   |   |   |   |   |   |   |   |   |   |   |   |   |   |   |   |   |   |   |   |   |   |   |   |   |   |   |   |   |   |   |   |   |   |   |   |   |   |   |   |   |   |   |   |   |   |   |   |   |   |   |   |   |   |   |   |   |   |   |   |   |   |   |   |   |   |   |   |   |   |   |   |   |   |   |   |   |   |   |   |   |   |   |   |   |   |   |   |   |   |   |   |   |   |   |   |   |   |   |   |   |   |   |   |   |   |   |   |   |   |   |   |   |   |   |   |   |   |   |   |   |   |   |   |   |   |   |   |   |   |   |   |   |   |   |   |   |   |   |   |   |   |   |   |   |   |   |   |   |   |   |   |   |   |   |   |   |   |   |   |   |   |   |   |   |   |   |   |   |   |   |   |   |   |   |   |   |   |   |   |   |   |   |   |   |   |   |   |   |   |   |   |   |   |   |   |   |   |   |   |   |   |   |   |   |   |   |   |   |   |   |   |
|                                                                              |       | Section 3 |             |        |        |     |        |     |        |      |     |     |       |     |    |        |     |    |     |      |      |    |     |     |      |      |     |    |      |    |   |   |   |   |   |    |    |    |    |     |    |    |   |   |   |    |   |    |   |   |   |   |   |   |   |   |   |   |   |   |   |   |   |   |   |   |   |   |   |   |   |   |   |   |   |   |   |   |   |   |   |   |   |   |   |   |   |   |   |   |   |   |   |   |   |   |   |   |   |   |   |   |   |   |   |   |   |   |   |   |   |   |   |   |   |   |   |   |   |   |   |   |   |   |   |   |   |   |   |   |   |   |   |   |   |   |   |   |   |   |   |   |   |   |   |   |   |   |   |   |   |   |   |   |   |   |   |   |   |   |   |   |   |   |   |   |   |   |   |   |   |   |   |   |   |   |   |   |   |   |   |   |   |   |   |   |   |   |   |   |   |   |   |   |   |   |   |   |   |   |   |   |   |   |   |   |   |   |   |   |   |   |   |   |   |   |   |   |   |   |   |   |   |   |   |   |   |   |   |   |   |   |   |   |   |   |   |   |   |   |   |   |   |   |   |   |   |   |   |   |   |   |   |   |   |   |   |   |   |   |   |   |   |   |   |   |   |   |   |   |   |   |   |   |   |   |   |   |   |   |   |   |   |   |   |   |   |   |   |   |   |   |   |   |   |   |   |   |   |   |   |   |   |   |   |   |   |   |   |   |   |   |   |   |   |   |   |   |   |   |   |   |   |   |   |   |   |   |   |   |   |   |   |   |   |   |   |   |   |   |   |   |   |   |   |   |   |   |   |   |   |   |   |   |   |   |   |   |   |   |   |   |   |   |   |   |   |   |   |   |   |   |   |   |   |   |   |   |   |   |   |   |   |   |   |   |   |   |   |   |   |   |   |   |   |   |   |   |   |   |   |   |   |   |   |   |   |   |   |   |   |   |   |   |   |   |   |   |   |   |   |   |   |   |   |   |   |   |   |   |   |   |   |   |   |   |   |   |   |   |   |   |   |   |   |   |   |   |   |   |   |   |   |   |   |   |   |   |   |   |   |   |   |   |   |   |   |   |   |   |   |   |   |   |   |   |   |   |   |   |   |   |   |   |   |   |   |   |   |   |   |   |   |   |   |   |   |   |   |   |   |   |   |   |   |   |   |   |   |   |   |   |   |   |   |   |   |   |   |   |   |   |   |   |   |   |   |   |   |   |   |   |   |   |   |   |   |   |   |   |   |   |   |   |   |   |   |   |   |   |   |   |   |   |   |   |   |   |   |   |   |   |   |   |   |   |   |   |   |   |   |   |   |   |   |   |   |   |   |   |   |   |   |   |   |   |   |   |   |   |   |   |   |   |   |   |   |   |   |   |   |   |   |   |   |   |   |   |   |   |   |   |   |   |   |   |   |   |   |   |   |   |   |   |   |   |   |   |   |   |   |   |   |   |   |   |   |   |   |   |   |   |   |   |   |   |   |   |   |   |   |   |   |   |   |   |   |   |   |   |   |   |   |   |   |   |   |   |   |   |   |   |   |   |   |   |   |   |   |   |   |   |   |   |   |   |   |   |   |   |   |   |   |   |   |   |   |   |   |   |   |   |   |   |   |   |   |   |   |   |   |   |   |   |   |   |   |   |   |   |   |   |   |   |   |   |   |   |   |   |   |   |   |   |   |   |   |   |   |   |   |   |   |   |   |   |   |   |   |   |   |   |   |   |   |   |   |   |   |   |   |   |   |   |   |   |   |   |   |   |   |   |   |   |   |   |   |   |   |   |   |   |   |   |   |   |   |   |   |   |   |   |   |   |   |   |   |   |   |   |   |   |   |   |   |   |   |   |   |   |   |   |   |   |   |   |   |   |   |   |   |   |   |   |   |   |   |   |   |   |   |   |   |   |   |   |   |   |   |   |   |   |   |   |   |   |   |   |   |   |   |   |   |   |   |   |   |   |   |   |   |   |   |   |   |   |   |   |   |   |   |   |   |   |   |   |   |   |   |   |   |   |   |   |   |   |   |   |   |   |   |   |   |   |   |   |   |   |   |   |   |   |   |   |   |   |   |   |   |   |   |   |   |   |   |   |   |   |   |   |   |   |   |   |   |   |   |   |   |   |   |   |   |   |   |   |   |   |   |   |   |   |   |   |   |   |   |   |   |   |   |   |   |   |   |   |   |   |   |   |   |   |   |   |   |   |   |   |   |   |   |   |   |   |   |   |   |   |   |   |   |   |   |   |   |   |   |   |   |   |   |   |   |   |   |   |   |   |   |   |   |   |   |   |   |   |   |   |   |   |
| SARS-CoV-2 Region 11168 - 29055 nt<br>Homo sapiens mitochondrion NC_012920.1 | (171) | 171       | 180         | 190    | 200    | 210 | 220    | 230 | 240    | 255  |     |     |       |     |    |        |     |    |     |      |      |    |     |     |      |      |     |    |      |    |   |   |   |   |   |    |    |    |    |     |    |    |   |   |   |    |   |    |   |   |   |   |   |   |   |   |   |   |   |   |   |   |   |   |   |   |   |   |   |   |   |   |   |   |   |   |   |   |   |   |   |   |   |   |   |   |   |   |   |   |   |   |   |   |   |   |   |   |   |   |   |   |   |   |   |   |   |   |   |   |   |   |   |   |   |   |   |   |   |   |   |   |   |   |   |   |   |   |   |   |   |   |   |   |   |   |   |   |   |   |   |   |   |   |   |   |   |   |   |   |   |   |   |   |   |   |   |   |   |   |   |   |   |   |   |   |   |   |   |   |   |   |   |   |   |   |   |   |   |   |   |   |   |   |   |   |   |   |   |   |   |   |   |   |   |   |   |   |   |   |   |   |   |   |   |   |   |   |   |   |   |   |   |   |   |   |   |   |   |   |   |   |   |   |   |   |   |   |   |   |   |   |   |   |   |   |   |   |   |   |   |   |   |   |   |   |   |   |   |   |   |   |   |   |   |   |   |   |   |   |   |   |   |   |   |   |   |   |   |   |   |   |   |   |   |   |   |   |   |   |   |   |   |   |   |   |   |   |   |   |   |   |   |   |   |   |   |   |   |   |   |   |   |   |   |   |   |   |   |   |   |   |   |   |   |   |   |   |   |   |   |   |   |   |   |   |   |   |   |   |   |   |   |   |   |   |   |   |   |   |   |   |   |   |   |   |   |   |   |   |   |   |   |   |   |   |   |   |   |   |   |   |   |   |   |   |   |   |   |   |   |   |   |   |   |   |   |   |   |   |   |   |   |   |   |   |   |   |   |   |   |   |   |   |   |   |   |   |   |   |   |   |   |   |   |   |   |   |   |   |   |   |   |   |   |   |   |   |   |   |   |   |   |   |   |   |   |   |   |   |   |   |   |   |   |   |   |   |   |   |   |   |   |   |   |   |   |   |   |   |   |   |   |   |   |   |   |   |   |   |   |   |   |   |   |   |   |   |   |   |   |   |   |   |   |   |   |   |   |   |   |   |   |   |   |   |   |   |   |   |   |   |   |   |   |   |   |   |   |   |   |   |   |   |   |   |   |   |   |   |   |   |   |   |   |   |   |   |   |   |   |   |   |   |   |   |   |   |   |   |   |   |   |   |   |   |   |   |   |   |   |   |   |   |   |   |   |   |   |   |   |   |   |   |   |   |   |   |   |   |   |   |   |   |   |   |   |   |   |   |   |   |   |   |   |   |   |   |   |   |   |   |   |   |   |   |   |   |   |   |   |   |   |   |   |   |   |   |   |   |   |   |   |   |   |   |   |   |   |   |   |   |   |   |   |   |   |   |   |   |   |   |   |   |   |   |   |   |   |   |   |   |   |   |   |   |   |   |   |   |   |   |   |   |   |   |   |   |   |   |   |   |   |   |   |   |   |   |   |   |   |   |   |   |   |   |   |   |   |   |   |   |   |   |   |   |   |   |   |   |   |   |   |   |   |   |   |   |   |   |   |   |   |   |   |   |   |   |   |   |   |   |   |   |   |   |   |   |   |   |   |   |   |   |   |   |   |   |   |   |   |   |   |   |   |   |   |   |   |   |   |   |   |   |   |   |   |   |   |   |   |   |   |   |   |   |   |   |   |   |   |   |   |   |   |   |   |   |   |   |   |   |   |   |   |   |   |   |   |   |   |   |   |   |   |   |   |   |   |   |   |   |   |   |   |   |   |   |   |   |   |   |   |   |   |   |   |   |   |   |   |   |   |   |   |   |   |   |   |   |   |   |   |   |   |   |   |   |   |   |   |   |   |   |   |   |   |   |   |   |   |   |   |   |   |   |   |   |   |   |   |   |   |   |   |   |   |   |   |   |   |   |   |   |   |   |   |   |   |   |   |   |   |   |   |   |   |   |   |   |   |   |   |   |   |   |   |   |   |   |   |   |   |   |   |   |   |   |   |   |   |   |   |   |   |   |   |   |   |   |   |   |   |   |   |   |   |   |   |   |   |   |   |   |   |   |   |   |   |   |   |   |   |   |   |   |   |   |   |   |   |   |   |   |   |   |   |   |   |   |   |   |   |   |   |   |   |   |   |   |   |   |   |   |   |   |   |   |   |   |   |   |   |   |   |   |   |   |   |   |   |   |   |   |   |   |   |   |   |   |   |   |   |   |   |   |   |   |   |   |   |   |   |   |   |   |   |   |   |   |   |   |   |   |   |   |   |   |   |   |
|                                                                              | (170) | T         | A           | C      | T      | A   | A      | T   | C      | T    | T   | A   | T     | G   | A  | C      | A   | G  | C   | A    | A    | G  | A   | C   | T    | G    | T   | G  | T    | A  | T | G | A | A | T | G  | T  | C  | T  | T   | G  | T  | A | C | T | T  | G | T  | A | C | T | T | G | T | A | C | T | T | G | T | A | C | T | T | G | T | A | C | T | T | G | T | A | C | T | T | G | T | A | C | T | T | G | T | A | C | T | T | G | T | A | C | T | T | G | T | A | C | T | T | G | T | A | C | T | T | G | T | A | C | T | T | G | T | A | C | T | T | G | T | A | C | T | T | G | T | A | C | T | T | G | T | A | C | T | T | G | T | A | C | T | T | G | T | A | C | T | T | G | T | A | C | T | T | G | T | A | C | T | T | G | T | A | C | T | T | G | T | A | C | T | T | G | T | A | C | T | T | G | T | A | C | T | T | G | T | A | C | T | T | G | T | A | C | T | T | G | T | A | C | T | T | G | T | A | C | T | T | G | T | A | C | T | T | G | T | A | C | T | T | G | T | A | C | T | T | G | T | A | C | T | T | G | T | A | C | T | T | G | T | A | C | T | T | G | T | A | C | T | T | G | T | A | C | T | T | G | T | A | C | T | T | G | T | A | C | T | T | G | T | A | C | T | T | G | T | A | C | T | T | G | T | A | C | T | T | G | T | A | C | T | T | G | T | A | C | T | T | G | T | A | C | T | T | G | T | A | C | T | T | G | T | A | C | T | T | G | T | A | C | T | T | G | T | A | C | T | T | G | T | A | C | T | T | G | T | A | C | T | T | G | T | A | C | T | T | G | T | A | C | T | T | G | T | A | C | T | T | G | T | A | C | T | T | G | T | A | C | T | T | G | T | A | C | T | T | G | T | A | C | T | T | G | T | A | C | T | T | G | T | A | C | T | T | G | T | A | C | T | T | G | T | A | C | T | T | G | T | A | C | T | T | G | T | A | C | T | T | G | T | A | C | T | T | G | T | A | C | T | T | G | T | A | C | T | T | G | T | A | C | T | T | G | T | A | C | T | T | G | T | A | C | T | T | G | T | A | C | T | T | G | T | A | C | T | T | G | T | A | C | T | T | G | T | A | C | T | T | G | T | A | C | T | T | G | T | A | C | T | T | G | T | A | C | T | T | G | T | A | C | T | T | G | T | A | C | T | T | G | T | A | C | T | T | G | T | A | C | T | T | G | T | A | C | T | T | G | T | A | C | T | T | G | T | A | C | T | T | G | T | A | C | T | T | G | T | A | C | T | T | G | T | A | C | T | T | G | T | A | C | T | T | G | T | A | C | T | T | G | T | A | C | T | T | G | T | A | C | T | T | G | T | A | C | T | T | G | T | A | C | T | T | G | T | A | C | T | T | G | T | A | C | T | T | G | T | A | C | T | T | G | T | A | C | T | T | G | T | A | C | T | T | G | T | A | C | T | T | G | T | A | C | T | T | G | T | A | C | T | T | G | T | A | C | T | T | G | T | A | C | T | T | G | T | A | C | T | T | G | T | A | C | T | T | G | T | A | C | T | T | G | T | A | C | T | T | G | T | A | C | T | T | G | T | A | C | T | T | G | T | A | C | T | T | G | T | A | C | T | T | G | T | A | C | T | T | G | T | A | C | T | T | G | T | A | C | T | T | G | T | A | C | T | T | G | T | A | C | T | T | G | T | A | C | T | T | G | T | A | C | T | T | G | T | A | C | T | T | G | T | A | C | T | T | G | T | A | C | T | T | G | T | A | C | T | T | G | T | A | C | T | T | G | T | A | C | T | T | G | T | A | C | T | T | G | T | A | C | T | T | G | T | A | C | T | T | G | T | A | C | T | T | G | T | A | C | T | T | G | T | A | C | T | T | G | T | A | C | T | T | G | T | A | C | T | T | G | T | A | C | T | T | G | T | A | C | T | T | G | T | A | C | T | T | G | T | A | C | T | T | G | T | A | C | T | T | G | T | A | C | T | T | G | T | A | C | T | T | G | T | A | C | T | T | G | T | A | C | T | T | G | T | A | C | T | T | G | T | A | C | T | T | G | T | A | C | T | T | G | T | A | C | T | T | G | T | A | C | T | T | G | T | A | C | T | T | G | T | A | C | T | T | G | T | A | C | T | T | G | T | A | C | T | T | G | T | A | C | T | T | G | T | A | C | T | T | G | T | A | C | T | T | G | T | A | C | T | T | G | T | A | C | T | T | G | T | A | C | T | T | G | T | A | C | T | T | G | T | A | C | T | T | G | T | A | C | T | T | G | T | A | C | T | T | G | T | A | C | T | T | G | T | A | C | T | T | G | T | A | C |

SARS-CoV-2 + human DNA.apr

|                                        |        |            |      |      |      |      |      |      |      |      |      |
|----------------------------------------|--------|------------|------|------|------|------|------|------|------|------|------|
|                                        |        | Section 8  |      |      |      |      |      |      |      |      |      |
|                                        |        | (596)      | 596  | 610  | 620  | 630  | 640  | 650  | 660  | 670  | 680  |
| SARS-CoV-2 Region 11168 - 29055 nt     | (593)  | AGA        | ATA  | G    | C    | A    | T    | A    | G    | A    | T    |
| Homo sapiens mitochondrion NC_012920.1 | (537)  | C          | --   | ATA  | C    | CC   | -    | GA   | AC   | C    | AA   |
|                                        |        | Section 9  |      |      |      |      |      |      |      |      |      |
|                                        |        | (681)      | 681  | 690  | 700  | 710  | 720  | 730  | 740  | 750  | 765  |
| SARS-CoV-2 Region 11168 - 29055 nt     | (675)  | G          | T    | C    | T    | A    | A    | A    | T    | G    | T    |
| Homo sapiens mitochondrion NC_012920.1 | (617)  | G          | T    | T    | A    | G    | A    | C    | G    | G    | G    |
|                                        |        | Section 10 |      |      |      |      |      |      |      |      |      |
|                                        |        | (766)      | 766  | 780  | 790  | 800  | 810  | 820  | 830  | 840  | 850  |
| SARS-CoV-2 Region 11168 - 29055 nt     | (756)  | -          | A    | T    | T    | G    | T    | G    | G    | C    | T    |
| Homo sapiens mitochondrion NC_012920.1 | (702)  | C          | A    | T    | C    | C    | C    | C    | G    | T    | T    |
|                                        |        | Section 11 |      |      |      |      |      |      |      |      |      |
|                                        |        | (851)      | 851  | 860  | 870  | 880  | 890  | 900  | 910  | 920  | 935  |
| SARS-CoV-2 Region 11168 - 29055 nt     | (837)  | A          | C    | T    | A    | C    | T    | T    | T    | C    | T    |
| Homo sapiens mitochondrion NC_012920.1 | (781)  | A          | A    | A    | A    | C    | G    | C    | T    | A    | G    |
|                                        |        | Section 12 |      |      |      |      |      |      |      |      |      |
|                                        |        | (936)      | 936  | 950  | 960  | 970  | 980  | 990  | 1000 | 1010 | 1020 |
| SARS-CoV-2 Region 11168 - 29055 nt     | (921)  | A          | C    | A    | A    | G    | C    | T    | A    | T    | A    |
| Homo sapiens mitochondrion NC_012920.1 | (862)  | A          | C    | T    | A    | A    | C    | C    | C    | A    | G    |
|                                        |        | Section 13 |      |      |      |      |      |      |      |      |      |
|                                        |        | (1021)     | 1021 | 1030 | 1040 | 1050 | 1060 | 1070 | 1080 | 1090 | 1105 |
| SARS-CoV-2 Region 11168 - 29055 nt     | (1006) | A          | A    | T    | G    | G    | T    | G    | A    | T    | T    |
| Homo sapiens mitochondrion NC_012920.1 | (942)  | A          | G    | T    | G    | T    | T    | T    | A    | G    | A    |
|                                        |        | Section 14 |      |      |      |      |      |      |      |      |      |
|                                        |        | (1106)     | 1106 | 1120 | 1130 | 1140 | 1150 | 1160 | 1170 | 1180 | 1190 |
| SARS-CoV-2 Region 11168 - 29055 nt     | (1091) | A          | A    | C    | G    | T    | A    | A    | G    | T    | T    |
| Homo sapiens mitochondrion NC_012920.1 | (1021) | T          | A    | C    | G    | A    | A    | A    | G    | T    | G    |

SARS-CoV-2 + human DNA.apr

|                                        |        |            |      |       |          |        |        |          |          |          |                     |               |       |        |         |      |        |          |                      |
|----------------------------------------|--------|------------|------|-------|----------|--------|--------|----------|----------|----------|---------------------|---------------|-------|--------|---------|------|--------|----------|----------------------|
|                                        |        | Section 15 |      |       |          |        |        |          |          |          |                     |               |       |        |         |      |        |          |                      |
|                                        |        | (1191)     | 1191 | 1200  | 1210     | 1220   | 1230   | 1240     | 1250     | 1260     | 1275                |               |       |        |         |      |        |          |                      |
| SARS-CoV-2 Region 11168 - 29055 nt     | (1164) | GG         | CAA  | AGT   | TACTAGT  | GCTATG | CAGACA | ATGCTTTT | CACTATG  | CTTAGA   | AAGTTGGATAATGATGCAC | TCAAC         |       |        |         |      |        |          |                      |
| Homo sapiens mitochondrion NC_012920.1 | (1106) | CT         | CAA  | AGT   | TAAATCAA | CAA    | AAC    | TGCTCGC  | CAGAA    | CAC      | TATGCTTC            | CAAT          |       |        |         |      |        |          |                      |
|                                        |        | Section 16 |      |       |          |        |        |          |          |          |                     |               |       |        |         |      |        |          |                      |
|                                        |        | (1276)     | 1276 | 1290  | 1300     | 1310   | 1320   | 1330     | 1340     | 1350     | 1360                |               |       |        |         |      |        |          |                      |
| SARS-CoV-2 Region 11168 - 29055 nt     | (1249) | AATG       | CAAG | AGATG | GTTTG    | TGTTCC | TGAAC  | ATAAT    | ACCTCTTA | CAACAG   | CAGCCAA             | AACTAATGGTTGT | CATAC | CCAG   | ACTATAA | CA   |        |          |                      |
| Homo sapiens mitochondrion NC_012920.1 | (1188) | A          | TCC  | C     | TCT      | AGA    | G      | GAGCC    | TGTTCT   | TGTAATCG | ATAA                | ACC           | CGAT  | CAAC   | CT      | CAC  | C      |          |                      |
|                                        |        | Section 17 |      |       |          |        |        |          |          |          |                     |               |       |        |         |      |        |          |                      |
|                                        |        | (1361)     | 1361 | 1370  | 1380     | 1390   | 1400   | 1410     | 1420     | 1430     | 1445                |               |       |        |         |      |        |          |                      |
| SARS-CoV-2 Region 11168 - 29055 nt     | (1334) | CA         | TAT  | AAA   | AA       | TAC    | GTG    | TGAT     | GGTAC    | AA       | CA                  | ATTT          | ACTAT | TGCATC | AG      | CA   | ATTGTG | G        |                      |
| Homo sapiens mitochondrion NC_012920.1 | (1267) | TC         | TTC  | AGC   | AA       | ACC    | CTGA   | TGA      | AGG      | --       | CTACA               | ---           | AAG   | TA     | AGC     | GCA  | AGT    | ATCCCATG |                      |
|                                        |        | Section 18 |      |       |          |        |        |          |          |          |                     |               |       |        |         |      |        |          |                      |
|                                        |        | (1446)     | 1446 | 1460  | 1470     | 1480   | 1490   | 1500     | 1510     | 1520     | 1530                |               |       |        |         |      |        |          |                      |
| SARS-CoV-2 Region 11168 - 29055 nt     | (1418) | AAAT       | TG   | TTCA  | ACT      | TAG    | TGA    | AAT      | TAG      | TAT      | TGGA                | CA            | ATT   | CA     | CTA     | ATT  | TAGC   | ATGG     |                      |
| Homo sapiens mitochondrion NC_012920.1 | (1346) | A          | GG   | TG    | CAAG     | AA     | TGG    | GCT      | ACAT     | TTT      | CT                  | TACC          | CA    | GAA    | AA      | CTA  | CGA    | TAGC     |                      |
|                                        |        | Section 19 |      |       |          |        |        |          |          |          |                     |               |       |        |         |      |        |          |                      |
|                                        |        | (1531)     | 1531 | 1540  | 1550     | 1560   | 1570   | 1580     | 1590     | 1600     | 1615                |               |       |        |         |      |        |          |                      |
| SARS-CoV-2 Region 11168 - 29055 nt     | (1503) | T          | GC   | TG    | TCA      | AA     | TAC    | AGAA     | TA       | ATGA     | GCTTAGT             | -----         | CC    | TG     | TT      | GC   | AC     | TACG     | ACAGATGTCTTGTGCTG    |
| Homo sapiens mitochondrion NC_012920.1 | (1428) | -          | GC   | AGT   | -        | AAA    | CTA    | AGAG     | TA       | GAGT     | GCTTAGT             | TGAACAGGG     | CC    | CTG    | AA      | GC   | G      | CGTAC    | ACACCGCCCGT          |
|                                        |        | Section 20 |      |       |          |        |        |          |          |          |                     |               |       |        |         |      |        |          |                      |
|                                        |        | (1616)     | 1616 | 1630  | 1640     | 1650   | 1660   | 1670     | 1680     | 1690     | 1700                |               |       |        |         |      |        |          |                      |
| SARS-CoV-2 Region 11168 - 29055 nt     | (1578) | AACTG      | CCTG | CAC   | TG       | ATG    | ACAA   | TG       | CGTT     | AGCTT    | ACTACA              | AA            | CA    | AA     | CA      | AA   | GG     | GAGG     | TAGGTTTGTACTTG       |
| Homo sapiens mitochondrion NC_012920.1 | (1510) | TCAA       | AGG  | AC    | ATT      | TAA    | CTA    | AAA      | CC       | CTAC     | GCAT                | TTT           | TAT   | AT     | AG      | AGG  | AG     | CAAGTCG  | TAACATG              |
|                                        |        | Section 21 |      |       |          |        |        |          |          |          |                     |               |       |        |         |      |        |          |                      |
|                                        |        | (1701)     | 1701 | 1710  | 1720     | 1730   | 1740   | 1750     | 1760     | 1770     | 1785                |               |       |        |         |      |        |          |                      |
| SARS-CoV-2 Region 11168 - 29055 nt     | (1662) | AC         | AG   | GA    | TTT      | GAA    | TG     | GGC      | TAG      | ATT      | CC                  | TAA           | AG    | AG     | TGA     | TGG  | AACT   | GGT      | ACTATCTATACAGAACTTGG |
| Homo sapiens mitochondrion NC_012920.1 | (1594) | GG         | AC   | GA    | ACC      | AG     | TG     | ---      | TAG      | CTT      | AAC                 | ACA           | AAG   | C      | ACCC    | AACT | TAC    | ACT      | ---                  |

SARS-CoV-2 + human DNA.apr

|                                        |        |                    |            |            |             |            |            |            |            |          |              |          |              |        |       |       |       |        |       |       |     |    |
|----------------------------------------|--------|--------------------|------------|------------|-------------|------------|------------|------------|------------|----------|--------------|----------|--------------|--------|-------|-------|-------|--------|-------|-------|-----|----|
|                                        |        | Section 22         |            |            |             |            |            |            |            |          |              |          |              |        |       |       |       |        |       |       |     |    |
|                                        |        | (1786)             | 1786       | 1800       | 1810        | 1820       | 1830       | 1840       | 1850       | 1860     | 1870         |          |              |        |       |       |       |        |       |       |     |    |
| SARS-CoV-2 Region 11168 - 29055 nt     | (1744) | GTTACAGACACACCTAAA | GGTCCT     | AAAGTGAA   | AGTATTTAT   | ACTTTTATTA | AAAGGATTA  | AACAACCT   | AAATAGAGG  | TATGG    | TACTT        | G        |              |        |       |       |       |        |       |       |     |    |
| Homo sapiens mitochondrion NC_012920.1 | (1671) | GCTAAACCTAGCCCAA   | CCCACT     | CCACCTT    | ACTACC-     | AGACAACC   | TTAGCCA    | AACCATTT   | ACC        | CAATAAAG | -TATAG       | GCGATTA  |              |        |       |       |       |        |       |       |     |    |
|                                        |        | Section 23         |            |            |             |            |            |            |            |          |              |          |              |        |       |       |       |        |       |       |     |    |
|                                        |        | (1871)             | 1871       | 1880       | 1890        | 1900       | 1910       | 1920       | 1930       | 1940     | 1955         |          |              |        |       |       |       |        |       |       |     |    |
| SARS-CoV-2 Region 11168 - 29055 nt     | (1879) | GTAGTTTA--G        | CTGCCACAG  | TACGTCT    | CAAGCTG     | GTAATG     | CAACAGAA   | GTGCCTGCCA | ATTCAA     | CTGTAT   | TATCTTTCT    | GTGCT    |              |        |       |       |       |        |       |       |     |    |
| Homo sapiens mitochondrion NC_012920.1 | (1754) | GAAATTGA           | AAACCTGG   | CGCAATAG   | TATAGTACC-- | GCAAGG     | GAAGAAAGAT | GAAAAATTAT | AACCAA     | GCAATA   | TATAGCAAG    | GACTA    |              |        |       |       |       |        |       |       |     |    |
|                                        |        | Section 24         |            |            |             |            |            |            |            |          |              |          |              |        |       |       |       |        |       |       |     |    |
|                                        |        | (1956)             | 1956       | 1970       | 1980        | 1990       | 2000       | 2010       | 2020       | 2030     | 2040         |          |              |        |       |       |       |        |       |       |     |    |
| SARS-CoV-2 Region 11168 - 29055 nt     | (1912) | TTTGCTGTAGAT       | TGCTGCTAA  | GCCTACAAAG | ATTATCTAG   | CTAGT      | AGTGGGGGA  | CAACCAATCA | CTAA       | TTGTTGT  | TAAGATGTTTGT | TA       |              |        |       |       |       |        |       |       |     |    |
| Homo sapiens mitochondrion NC_012920.1 | (1836) | ACCCCTAT           | TACCCTCTGC | ATAA--TGA  | -----       | ATTAACTAG  | AAATAA     | CTTTG      | CAAGGAGAGC | CAAA--   | GCTAAGA      | CCCCCGAA |              |        |       |       |       |        |       |       |     |    |
|                                        |        | Section 25         |            |            |             |            |            |            |            |          |              |          |              |        |       |       |       |        |       |       |     |    |
|                                        |        | (2041)             | 2041       | 2050       | 2060        | 2070       | 2080       | 2090       | 2100       | 2110     | 2125         |          |              |        |       |       |       |        |       |       |     |    |
| SARS-CoV-2 Region 11168 - 29055 nt     | (1997) | CACACAC            | TGCTA      | CTGGTCA    | AGGCAAT     | AACAGTTA   | CACCGGAAG  | CCAATATG   | GATCAAGA   | AATCCTTT | GGTGGTGC     | ATCGTGT  | TGCT         |        |       |       |       |        |       |       |     |    |
| Homo sapiens mitochondrion NC_012920.1 | (1910) | C-CAG              | ACGAG--    | CTACCT     | AAG-AA      | CAGGTAAA   | AGAGGAC    | ACC        | CGTCTATG   | TAGCAA   | -AATAG       | TGGGAA   | GATTTATAG-GT | AGG    |       |       |       |        |       |       |     |    |
|                                        |        | Section 26         |            |            |             |            |            |            |            |          |              |          |              |        |       |       |       |        |       |       |     |    |
|                                        |        | (2126)             | 2126       | 2140       | 2150        | 2160       | 2170       | 2180       | 2190       | 2200     | 2210         |          |              |        |       |       |       |        |       |       |     |    |
| SARS-CoV-2 Region 11168 - 29055 nt     | (2082) | GTACTGCGTT         | TGCCACATAG | ATCATC-    | CAAACT      | CCTAAAG    | GATTT--    | TGTGACTT   | AAAAGG     | TAAATATG | TACAAAT      | ACCTAC   | CAACT        |        |       |       |       |        |       |       |     |    |
| Homo sapiens mitochondrion NC_012920.1 | (1989) | CGAC               | AAACCTTAC  | CGAGCCT    | GGTGAT      | AGCTGGT    | TGTTCC     | AGATAGAA   | TCTTAG     | TTCACTT  | TAAATTTG     | CCACAG   | AAC--CCTCT   |        |       |       |       |        |       |       |     |    |
|                                        |        | Section 27         |            |            |             |            |            |            |            |          |              |          |              |        |       |       |       |        |       |       |     |    |
|                                        |        | (2211)             | 2211       | 2220       | 2230        | 2240       | 2250       | 2260       | 2270       | 2280     | 2295         |          |              |        |       |       |       |        |       |       |     |    |
| SARS-CoV-2 Region 11168 - 29055 nt     | (2164) | TGTGCTAAT          | GACCC      | TGTGGG     | TTT         | TACAC      | TTAA--     | AAACA      | CAGTCT     | GTA      | CCGTCTG      | CGGTAT   | G            | TGG    | AAAGG | TTATG | CTGT  | AGT    | T     |       |     |    |
| Homo sapiens mitochondrion NC_012920.1 | (2072) | A-----             | AATCC      | CCCTGT     | AAAA        | TTTAA      | CTGTTA     | GTCC       | AAAG       | AGGAA    | CAGCT        | C        | TTTGG        | ACAC   | TAGG  | AAAA  | AAACC | TTGTAG | GAGAG | AGTA  |     |    |
|                                        |        | Section 28         |            |            |             |            |            |            |            |          |              |          |              |        |       |       |       |        |       |       |     |    |
|                                        |        | (2296)             | 2296       | 2310       | 2320        | 2330       | 2340       | 2350       | 2360       | 2370     | 2380         |          |              |        |       |       |       |        |       |       |     |    |
| SARS-CoV-2 Region 11168 - 29055 nt     | (2246) | GTGATCAAC          | TCCGCGA    | ACCCAT     | GCTTC       | AGTCA      | AGCTGA     | TGCA       | CAATCG     | T        | TTTAA        | AA       | CGG          | GTTTGC | GGTGT | AAGTG | CAGCC | CGTCT  | T     |       |     |    |
| Homo sapiens mitochondrion NC_012920.1 | (2152) | ---                | AAA        | AA         | T           | TAA        | C--        | ACCCAT     | AGT--      | AGG      | CTAAA        | AGCAG    | CA           | CCAA   | TTAAG | AAAGC | GTTCA | AGCTCA | ACACC | CA--- | CTA | CT |

SARS-CoV-2 + human DNA.apr

|                                        |        |            |      |      |      |      |      |      |      |      |      |
|----------------------------------------|--------|------------|------|------|------|------|------|------|------|------|------|
|                                        |        | Section 29 |      |      |      |      |      |      |      |      |      |
|                                        |        | (2381)     | 2381 | 2390 | 2400 | 2410 | 2420 | 2430 | 2440 | 2450 | 2465 |
| SARS-CoV-2 Region 11168 - 29055 nt     | (2331) | AC         | ACC  | TGC  | GGC  | ACA  | GGC  | AC   | TAG  | CT   | GA   |
| Homo sapiens mitochondrion NC_012920.1 | (2227) | AAA        | AAA  | TCC  | CAA  | ACA  | ---- | TA   | TA   | ACT  | GA   |
|                                        |        | Section 30 |      |      |      |      |      |      |      |      |      |
|                                        |        | (2466)     | 2466 | 2480 | 2490 | 2500 | 2510 | 2520 | 2530 | 2540 | 2550 |
| SARS-CoV-2 Region 11168 - 29055 nt     | (2412) | AA         | ATT  | CC   | TAA  | AA   | ACT  | AA   | TTG  | TTG  | TC   |
| Homo sapiens mitochondrion NC_012920.1 | (2306) | ATA        | AG   | --   | TAA  | CA   | TGA  | AA   | ACA  | TT   | CT   |
|                                        |        | Section 31 |      |      |      |      |      |      |      |      |      |
|                                        |        | (2551)     | 2551 | 2560 | 2570 | 2580 | 2590 | 2600 | 2610 | 2620 | 2635 |
| SARS-CoV-2 Region 11168 - 29055 nt     | (2496) | CAC        | AC   | TT   | TCT  | CTA  | ACT  | AC   | CA   | AC   | AT   |
| Homo sapiens mitochondrion NC_012920.1 | (2379) | C          | CA   | AT   | A    | T    | F    | C    | T    | ---  | AC   |
|                                        |        | Section 32 |      |      |      |      |      |      |      |      |      |
|                                        |        | (2636)     | 2636 | 2650 | 2660 | 2670 | 2680 | 2690 | 2700 | 2710 | 2720 |
| SARS-CoV-2 Region 11168 - 29055 nt     | (2580) | AAG        | TTT  | AG   | AA   | TAG  | A    | CGG  | TG   | AC   | AT   |
| Homo sapiens mitochondrion NC_012920.1 | (2446) | AAG        | GAA  | AG   | GT   | TAA  | AAAA | AG   | TAA  | AGG  | AAC  |
|                                        |        | Section 33 |      |      |      |      |      |      |      |      |      |
|                                        |        | (2721)     | 2721 | 2730 | 2740 | 2750 | 2760 | 2770 | 2780 | 2790 | 2805 |
| SARS-CoV-2 Region 11168 - 29055 nt     | (2662) | CT         | T    | TA   | AGG  | CA   | TTTT | GAT  | GAA  | G    | GTA  |
| Homo sapiens mitochondrion NC_012920.1 | (2531) | -          | TT   | AG   | AGG  | CA   | CCG  | CCT  | ---- | G    | CCC  |
|                                        |        | Section 34 |      |      |      |      |      |      |      |      |      |
|                                        |        | (2806)     | 2806 | 2820 | 2830 | 2840 | 2850 | 2860 | 2870 | 2880 | 2890 |
| SARS-CoV-2 Region 11168 - 29055 nt     | (2743) | TC         | AA   | TAAA | AAGG | -    | AC   | TG   | STAT | GAT  | TT   |
| Homo sapiens mitochondrion NC_012920.1 | (2610) | TC         | CT   | TAAA | T    | AGG  | G    | AC   | CT   | G    | TAT  |
|                                        |        | Section 35 |      |      |      |      |      |      |      |      |      |
|                                        |        | (2891)     | 2891 | 2900 | 2910 | 2920 | 2930 | 2940 | 2950 | 2960 | 2975 |
| SARS-CoV-2 Region 11168 - 29055 nt     | (2824) | AAG        | CTTT | G    | TTA  | AA   | AA   | CA   | GTA  | CAA  | TT   |
| Homo sapiens mitochondrion NC_012920.1 | (2693) | AAG        | AGG  | C    | GGC  | A    | T    | AA   | CA   | CAG  | CAA  |

SARS-CoV-2 + human DNA.apr

|                                                                              |        |                                           |                                          |                                            |            |                   |                 |                      |                         |               |             |       |       |      |     |      |  |      |
|------------------------------------------------------------------------------|--------|-------------------------------------------|------------------------------------------|--------------------------------------------|------------|-------------------|-----------------|----------------------|-------------------------|---------------|-------------|-------|-------|------|-----|------|--|------|
|                                                                              |        | Section 36                                |                                          |                                            |            |                   |                 |                      |                         |               |             |       |       |      |     |      |  |      |
| SARS-CoV-2 Region 11168 - 29055 nt<br>Homo sapiens mitochondrion NC_012920.1 | (2976) | 2976                                      |                                          | 2990                                       |            | 3000              |                 | 3010                 |                         | 3020          |             | 3030  |       | 3040 |     | 3050 |  | 3060 |
|                                                                              | (2909) | CAATGGTAACTGGTATGATTTCGGTGATTTCATACAAACCA | CG                                       | CCAGGTAGTGGAGTTCTGTGTGTAGATTCTTATTATTCATTG |            |                   |                 |                      |                         |               |             |       |       |      |     |      |  |      |
|                                                                              | (2772) | CACAGGTCC----                             | TAAACCTACCAAACCTGCATTA                   | AAAA                                       | TTT        | CG                | ----            | GT                   | TGGGCGACCTCGGAGCAGAACCA | ACCTCCGAGCA   |             |       |       |      |     |      |  |      |
|                                                                              |        | Section 37                                |                                          |                                            |            |                   |                 |                      |                         |               |             |       |       |      |     |      |  |      |
| SARS-CoV-2 Region 11168 - 29055 nt<br>Homo sapiens mitochondrion NC_012920.1 | (3061) | 3061                                      |                                          | 3070                                       |            | 3080              |                 | 3090                 |                         | 3100          |             | 3110  |       | 3120 |     | 3130 |  | 3145 |
|                                                                              | (2994) | TTAATGCCTATATTAACTGACCAGGGCTTTAACTGCAGAGT | CACATGTTTGACACTTAAACAAAGCCTTACATTAAGTGGG |                                            |            |                   |                 |                      |                         |               |             |       |       |      |     |      |  |      |
|                                                                              | (2849) | GTAATGCTA-----                            | AGACTTACCAG-----                         | TCAA                                       | GC         | GAACTACTAT-----   | ACTCAATTGA----- | TCAA                 | TAACTTGA                |               |             |       |       |      |     |      |  |      |
|                                                                              |        | Section 38                                |                                          |                                            |            |                   |                 |                      |                         |               |             |       |       |      |     |      |  |      |
| SARS-CoV-2 Region 11168 - 29055 nt<br>Homo sapiens mitochondrion NC_012920.1 | (3146) | 3146                                      |                                          | 3160                                       |            | 3170              |                 | 3180                 |                         | 3190          |             | 3200  |       | 3210 |     | 3220 |  | 3230 |
|                                                                              | (3079) | ATTTGTTAAAAATATGACTTCA                    | CGGAAGAGAGGTTAAAACTCTTTGACCGTTATTTAAATAT | TGGATCAGACATACCACCAA                       |            |                   |                 |                      |                         |               |             |       |       |      |     |      |  |      |
|                                                                              | (2911) | CCAACGGAAACAAGTTACCTAGGGA                 | TAA                                      | CAGCGCAATCCTATTCTAGAGTCCA                  | TATCAA     | CAATAGGGTT-----   | TAC             | AGCCTCGA             |                         |               |             |       |       |      |     |      |  |      |
|                                                                              |        | Section 39                                |                                          |                                            |            |                   |                 |                      |                         |               |             |       |       |      |     |      |  |      |
| SARS-CoV-2 Region 11168 - 29055 nt<br>Homo sapiens mitochondrion NC_012920.1 | (3231) | 3231                                      |                                          | 3240                                       |            | 3250              |                 | 3260                 |                         | 3270          |             | 3280  |       | 3290 |     | 3300 |  | 3315 |
|                                                                              | (3164) | TTGTGTTAACTGTTTGGATGACA                   | GATGCATTC                                | TGCA                                       | TTGTGC     | AAAC              | TTTAA           | TGTTTATTTCTCTACAGTGT | TCCCA                   | CCTAC         | AA          | GT    |       |      |     |      |  |      |
|                                                                              | (2991) | TGT                                       | TGG-ATCAG-----                           | GACA                                       | TCCCCGATGG | TGCA              | GCC-GCTA--      | TTAAAGTT             | CGTTTGTTC               | AAC           | GATTAAAGT   | CCTAC | GTGA  |      |     |      |  |      |
|                                                                              |        | Section 40                                |                                          |                                            |            |                   |                 |                      |                         |               |             |       |       |      |     |      |  |      |
| SARS-CoV-2 Region 11168 - 29055 nt<br>Homo sapiens mitochondrion NC_012920.1 | (3316) | 3316                                      |                                          | 3330                                       |            | 3340              |                 | 3350                 |                         | 3360          |             | 3370  |       | 3380 |     | 3390 |  | 3400 |
|                                                                              | (3249) | TTTGGACCACTAGTGAGAA                       | AATATTTGTGATGGTGTTC                      | ATT                                        | TGTAGTTTCA | CTGTTAGTTTCA      | CTGGATAC        | CACTT---C            | AGAGAGCTA               | GGT           |             |       |       |      |     |      |  |      |
|                                                                              | (3065) | TC                                        | TGAGTTCAGACC                             | G-AGTAAT                                   | CCAGGT     | CGTTTCTATCTACNTTC | AAATTC          | CTCCCTG              | TACGA                   | AAGGACA       | AGAGA       | AA    | TAGGC |      |     |      |  |      |
|                                                                              |        | Section 41                                |                                          |                                            |            |                   |                 |                      |                         |               |             |       |       |      |     |      |  |      |
| SARS-CoV-2 Region 11168 - 29055 nt<br>Homo sapiens mitochondrion NC_012920.1 | (3401) | 3401                                      |                                          | 3410                                       |            | 3420              |                 | 3430                 |                         | 3440          |             | 3450  |       | 3460 |     | 3470 |  | 3485 |
|                                                                              | (3330) | GTTGTACATAA                               | TCAGGATGTAAAC                            | TTACAT--AGC-TCTAG                          | ACTTAGT    | TTAAGGAATT        | ACTTGTGTAT      | GCTGCTG              | ACCC                    | TGCT          |             |       |       |      |     |      |  |      |
|                                                                              | (3149) | C                                         | TACTTCA                                  | AAAGCGCCTT                                 | CCCCCGTA   | AATGATATCATCTCA   | ACTTAGT         | TTATACCCAC           | ACCCACCC                | AAGAA-CAGGGTT | TGTT        |       |       |      |     |      |  |      |
|                                                                              |        | Section 42                                |                                          |                                            |            |                   |                 |                      |                         |               |             |       |       |      |     |      |  |      |
| SARS-CoV-2 Region 11168 - 29055 nt<br>Homo sapiens mitochondrion NC_012920.1 | (3486) | 3486                                      |                                          | 3500                                       |            | 3510              |                 | 3520                 |                         | 3530          |             | 3540  |       | 3550 |     | 3560 |  | 3570 |
|                                                                              | (3411) | ATGCACGCTGCTTCTGGTAATC                    | TATTA                                    | CTAGA                                      | TAAACG     | CAC               | TACGTGCTTTTCAGT | AGCTGC               | ACTTAC                  | TAACAA        | TGTTGCTTTTC |       |       |      |     |      |  |      |
|                                                                              | (3233) | AAGATGGCAGAGCC                            | GGTAATC                                  | GCA                                        | TAAAC      | CTTAA             | AA-CTT          | TACAGT               | CAGAGGTTCA              | ATTCCTCTTCT   | TAACAA      | CAT   | TAC   | CA   | TGG |      |  |      |

SARS-CoV-2 + human DNA.apr

|                                        |        |                                                                                            |      |      |      |      |      |      |      |      |      |
|----------------------------------------|--------|--------------------------------------------------------------------------------------------|------|------|------|------|------|------|------|------|------|
|                                        |        | Section 43                                                                                 |      |      |      |      |      |      |      |      |      |
|                                        |        | (3571)                                                                                     | 3571 | 3580 | 3590 | 3600 | 3610 | 3620 | 3630 | 3640 | 3655 |
| SARS-CoV-2 Region 11168 - 29055 nt     | (3496) | AAACTGTCAAACCGGTAATTTTAAACAAAGACTTCTA-TGACCTTGCTGTGTCTAAGGGTTTCTTTAAGGAAAGGAAAGTTCTGTTG    |      |      |      |      |      |      |      |      |      |
| Homo sapiens mitochondrion NC_012920.1 | (3317) | CCAAACCCTCTACTCC-TCAATTGTACGCA----TTCTAATCGCAAATGGCATTCTCTAATGCTTACCG-AACGAA--AAATTCTAGGC  |      |      |      |      |      |      |      |      |      |
|                                        |        | Section 44                                                                                 |      |      |      |      |      |      |      |      |      |
|                                        |        | (3656)                                                                                     | 3656 | 3670 | 3680 | 3690 | 3700 | 3710 | 3720 | 3730 | 3740 |
| SARS-CoV-2 Region 11168 - 29055 nt     | (3580) | AATTAAACACTTCTTCTTTGCTG-AGGATGGTAATGCTGCTATTCAGCGATATATGACT----ACTATCGTTATAATCTAC--CAA     |      |      |      |      |      |      |      |      |      |
| Homo sapiens mitochondrion NC_012920.1 | (3394) | TATATACA-ACTAGCAGAAAGGCGCAACGTTGTAG-GGCCCTACGCGCTACTACAACCTTCGCTGACGCCATAAAACTCTTCAAC      |      |      |      |      |      |      |      |      |      |
|                                        |        | Section 45                                                                                 |      |      |      |      |      |      |      |      |      |
|                                        |        | (3741)                                                                                     | 3741 | 3750 | 3760 | 3770 | 3780 | 3790 | 3800 | 3810 | 3825 |
| SARS-CoV-2 Region 11168 - 29055 nt     | (3658) | CAATGTG----TGATATCAG--ACAACCTACTATTTGTAGTTGAAGTTGTTGATAAGTACTTTGATTGTTACGATGTGGCTGTAT      |      |      |      |      |      |      |      |      |      |
| Homo sapiens mitochondrion NC_012920.1 | (3477) | CAAGAAGCCCCTAACACCGCCACATCTACCATCACCTCTTACA-TACCCGCCCGACCTTAGCTC-TACCATCGCTCTCTTAC         |      |      |      |      |      |      |      |      |      |
|                                        |        | Section 46                                                                                 |      |      |      |      |      |      |      |      |      |
|                                        |        | (3826)                                                                                     | 3826 | 3840 | 3850 | 3860 | 3870 | 3880 | 3890 | 3900 | 3910 |
| SARS-CoV-2 Region 11168 - 29055 nt     | (3737) | TAATG-CTAACCAAGTCATCGTCAACAACTAGACAAA-TCAGC--TGGTTTTCATTTTAATAAATGGGGT--AAGGCTAGAC-T       |      |      |      |      |      |      |      |      |      |
| Homo sapiens mitochondrion NC_012920.1 | (3560) | TAGAACCCTCCCATACCACACCCCTGGTCAACCTCAACCTAGGCCCTCTATTATTTATCTAGCCACCTCTAGCCTAGCCGT          |      |      |      |      |      |      |      |      |      |
|                                        |        | Section 47                                                                                 |      |      |      |      |      |      |      |      |      |
|                                        |        | (3911)                                                                                     | 3911 | 3920 | 3930 | 3940 | 3950 | 3960 | 3970 | 3980 | 3995 |
| SARS-CoV-2 Region 11168 - 29055 nt     | (3815) | TTATT--ATGATTCAATGAGTTATGAGGATCAAGATGCA-CTTTTCGCATATA----CAAAACGTAATGTTCATCCCTACTATAAC     |      |      |      |      |      |      |      |      |      |
| Homo sapiens mitochondrion NC_012920.1 | (3645) | TTACTCAATCCTCTGATCAGGG-TGAGCATCAACACTCAAACTACGCCCTGATCGGCGCACTGCGAGCAGTAGCCAAACAT--C       |      |      |      |      |      |      |      |      |      |
|                                        |        | Section 48                                                                                 |      |      |      |      |      |      |      |      |      |
|                                        |        | (3996)                                                                                     | 3996 | 4010 | 4020 | 4030 | 4040 | 4050 | 4060 | 4070 | 4080 |
| SARS-CoV-2 Region 11168 - 29055 nt     | (3893) | TCAATATGAACTCTTAAGTATGCCATTAGTGCAGAGAATAGAGCTCGCAACCGTAGCTGGTGTCTCTATCTGTAGTACTATGACCAAT   |      |      |      |      |      |      |      |      |      |
| Homo sapiens mitochondrion NC_012920.1 | (3727) | TCAATATGAACTCAACCTTA-GCCATCATTTCTACTATCAACATTACTAA---TAAGTGGCTCTCTTAACCTCTCCACCCCTTATCAACA |      |      |      |      |      |      |      |      |      |
|                                        |        | Section 49                                                                                 |      |      |      |      |      |      |      |      |      |
|                                        |        | (4081)                                                                                     | 4081 | 4090 | 4100 | 4110 | 4120 | 4130 | 4140 | 4150 | 4165 |
| SARS-CoV-2 Region 11168 - 29055 nt     | (3978) | AGACAGTTTCAACAAAAATTATT---GAAATCAATAGCC---GCCACTAGAGGAGCTA---CTGTAGTAATTG-GAACAAAGCAAA     |      |      |      |      |      |      |      |      |      |
| Homo sapiens mitochondrion NC_012920.1 | (3808) | ACACAGAAACCTCTGATTACTCCTGCCATCATGACCCCTTGCCCATATATGATTATCTCCACACTAGCAGAGACCAACCGAA         |      |      |      |      |      |      |      |      |      |

SARS-CoV-2 + human DNA.apr

|                                                                              |        |                              |                            |                       |                                 |                             |                     |            |           |           |           |
|------------------------------------------------------------------------------|--------|------------------------------|----------------------------|-----------------------|---------------------------------|-----------------------------|---------------------|------------|-----------|-----------|-----------|
|                                                                              |        | Section 50                   |                            |                       |                                 |                             |                     |            |           |           |           |
| SARS-CoV-2 Region 11168 - 29055 nt<br>Homo sapiens mitochondrion NC_012920.1 | (4166) | 4166                         | 4180                       | 4190                  | 4200                            | 4210                        | 4220                | 4230       | 4240      | 4250      |           |
|                                                                              | (4053) | TTCTATG-GTGGTTGGCACAA        | CATGTTAAAAAACTGT           | TATAGTGTAGAG          | AGTGTAGAG                       | AGTGTAGAG                   | AGTGTAGAG           | AGTGTAGAG  | AGTGTAGAG | AGTGTAGAG | AGTGTAGAG |
|                                                                              | (3893) | CCCTTCGACCTTGCCGAGGGG        | GAGTCCGAACTAGTCTCAG        | GCTTCAACATCGAA        | TACGAA                          | TACGAA                      | TACGAA              | TACGAA     | TACGAA    | TACGAA    | TACGAA    |
|                                                                              |        | Section 51                   |                            |                       |                                 |                             |                     |            |           |           |           |
| SARS-CoV-2 Region 11168 - 29055 nt<br>Homo sapiens mitochondrion NC_012920.1 | (4251) | 4251                         | 4260                       | 4270                  | 4280                            | 4290                        | 4300                | 4310       | 4320      | 4335      |           |
|                                                                              | (4135) | AATGTGATAGAGCCATGC-CTAACATGC | TTAGAA                     | TATGTTGGCC-TCAC       | TTGTTCTTGCTCGCA                 | AACATACA                    | ACAGTGTGTG          | TAGCTTG    |           |           |           |
|                                                                              | (3977) | ----TCATAGCCGAATACACA        | AACATTA                    | TTATAATAAACA          | CCCTCAC                         | CAC                         | TACAATCTTCTAGGA     | -ACAACATAT | -GACGCAC- |           |           |
|                                                                              |        | Section 52                   |                            |                       |                                 |                             |                     |            |           |           |           |
| SARS-CoV-2 Region 11168 - 29055 nt<br>Homo sapiens mitochondrion NC_012920.1 | (4336) | 4336                         | 4350                       | 4360                  | 4370                            | 4380                        | 4390                | 4400       | 4410      | 4420      |           |
|                                                                              | (4218) | TCACACCGTTTCTATAGATTAGC      | TAA                        | TGAGTGTGCTCAAG        | TATTGAGTGA                      | AATGGTCATGTGTGG             | CGGTTTCAC           | TATATGTTAA | AC        |           |           |
|                                                                              | (4055) | TCTCCCTGAACTCTACAACA         | TATTT--TGT                 | CACCAAG               | ACCCTACTTCTAACCTC               | -----CTGTTCT                | -TATGAATTCGA        |            |           |           |           |
|                                                                              |        | Section 53                   |                            |                       |                                 |                             |                     |            |           |           |           |
| SARS-CoV-2 Region 11168 - 29055 nt<br>Homo sapiens mitochondrion NC_012920.1 | (4421) | 4421                         | 4430                       | 4440                  | 4450                            | 4460                        | 4470                | 4480       | 4490      | 4505      |           |
|                                                                              | (4303) | CAGGTGGAACTCATCAGGAGATGCCACA | CAACTGCTTATGCTAA           | TA                    | GTGTTT                          | TTAACTTTGTCAAG              | CTGTCAC             | GGCC       | AATGTTA   |           |           |
|                                                                              | (4130) | CAGCATACCCTCGATCCGCTACGAC    | -CAACTCATACACCTCCTA        | -----TGAAAAAAC        | TTCCTAC                         | CAC                         | TCACCT              | CTAGCATTA- |           |           |           |
|                                                                              |        | Section 54                   |                            |                       |                                 |                             |                     |            |           |           |           |
| SARS-CoV-2 Region 11168 - 29055 nt<br>Homo sapiens mitochondrion NC_012920.1 | (4506) | 4506                         | 4520                       | 4530                  | 4540                            | 4550                        | 4560                | 4570       | 4580      | 4590      |           |
|                                                                              | (4388) | TGCACTTTTATCTACTGATGGTAA     | CAAAATTGCCGATAGTATGT       | CTCCGCAATT            | TACAAACAG                       | ACTTTATGAGTGTCTCT           | ATAGA               |            |           |           |           |
|                                                                              | (4207) | ----CTTATATGAT---ATGTCTCATA  | ----CCCATTA                | CAATCTCCAGCATTTCC     | AGCATTTCCCTCAAACCTA             | AGAATATGTCTGATAA            |                     |            |           |           |           |
|                                                                              |        | Section 55                   |                            |                       |                                 |                             |                     |            |           |           |           |
| SARS-CoV-2 Region 11168 - 29055 nt<br>Homo sapiens mitochondrion NC_012920.1 | (4591) | 4591                         | 4600                       | 4610                  | 4620                            | 4630                        | 4640                | 4650       | 4660      | 4675      |           |
|                                                                              | (4473) | AA                           | TAGAGATGTTGACACAG          | ACTTTGTGAATGAGTTT     | TACGCATATTTGCGTAA               | ACATTTCTCAAT                | GATGATACCTCTGACGATG |            |           |           |           |
|                                                                              | (4280) | AA                           | GAGTTACTTTGATAGAGTAAATAATA | AGGAGCTTAAAC          | CCCTTATTCTAGGAC                 | TATGAGAAATCGAACCACTCTGAGATC |                     |            |           |           |           |
|                                                                              |        | Section 56                   |                            |                       |                                 |                             |                     |            |           |           |           |
| SARS-CoV-2 Region 11168 - 29055 nt<br>Homo sapiens mitochondrion NC_012920.1 | (4676) | 4676                         | 4690                       | 4700                  | 4710                            | 4720                        | 4730                | 4740       | 4750      | 4760      |           |
|                                                                              | (4558) | CTGTTGTGTGTTTCAATAGCAC       | TATG-CATCTCAAGGTCTAGT      | --GGCTAGCA            | TAAAGAACTTTAAGTCAGTTCTTTATTATCA |                             |                     |            |           |           |           |
|                                                                              | (4365) | CAAAATCTT-----CGTGCCAC       | CATCAACCCCATCCCTAAAGTAA    | GGTCAAGC-TAAATAAAGCTA | ---TCGGGCCATACCCCGA             |                             |                     |            |           |           |           |



SARS-CoV-2 + human DNA.apr

|                                                                              |        |            |       |       |       |       |       |       |        |        |       |
|------------------------------------------------------------------------------|--------|------------|-------|-------|-------|-------|-------|-------|--------|--------|-------|
|                                                                              |        | Section 57 |       |       |       |       |       |       |        |        |       |
| SARS-CoV-2 Region 11168 - 29055 nt<br>Homo sapiens mitochondrion NC_012920.1 | (4761) | 4761       | 4770  | 4780  | 4790  | 4800  | 4810  | 4820  | 4830   | 4845   |       |
|                                                                              | (4640) | AAACAA     | TGTTT | TATG  | TCTG  | AAGCA | AAATG | TGGA  | CTGAGA | CTGACC | TTACT |
|                                                                              | (4442) | AAATGT     | TGTTT | ATAC  | CCCTT | CCCGT | ACTAT | TATC  | CTG    | CCCA   | ACCT  |
|                                                                              |        | Section 58 |       |       |       |       |       |       |        |        |       |
| SARS-CoV-2 Region 11168 - 29055 nt<br>Homo sapiens mitochondrion NC_012920.1 | (4846) | 4846       | 4860  | 4870  | 4880  | 4890  | 4900  | 4910  | 4920   | 4930   |       |
|                                                                              | (4775) | ATGCT      | AGTTA | ACAGG | TGATG | ATTAT | TGTAC | CTTCC | TTACC  | CAGAT  | TCCAT |
|                                                                              | (4514) | AGGC       | ACACT | CA    | TACAG | CGCTA | AGCTC | GCACT | GATTT  | TTACC  | TGAGT |
|                                                                              |        | Section 59 |       |       |       |       |       |       |        |        |       |
| SARS-CoV-2 Region 11168 - 29055 nt<br>Homo sapiens mitochondrion NC_012920.1 | (4931) | 4931       | 4940  | 4950  | 4960  | 4970  | 4980  | 4990  | 5000   | 5015   |       |
|                                                                              | (4810) | ATAT       | CGT   | AAAAA | CAGAT | TGGT  | ACACT | TATG  | ATTGA  | ACGGT  | TTCGT |
|                                                                              | (4599) | CTAA       | CA    | AAAAA | ATAA  | ----  | ACCT  | CGT   | ---    | TCC    | ACAG  |
|                                                                              |        | Section 60 |       |       |       |       |       |       |        |        |       |
| SARS-CoV-2 Region 11168 - 29055 nt<br>Homo sapiens mitochondrion NC_012920.1 | (5016) | 5016       | 5030  | 5040  | 5050  | 5060  | 5070  | 5080  | 5090   | 5100   |       |
|                                                                              | (4895) | TCA        | GGA   | GTAT  | GCT   | GAT   | GTCT  | TCA   | TTT    | TGT    | ACTT  |
|                                                                              | (4670) | -CA        | TAA   | TCC   | TCT   | AAT   | AGCT  | ATC   | CTCT   | TCA    | ---   |
|                                                                              |        | Section 61 |       |       |       |       |       |       |        |        |       |
| SARS-CoV-2 Region 11168 - 29055 nt<br>Homo sapiens mitochondrion NC_012920.1 | (5101) | 5101       | 5110  | 5120  | 5130  | 5140  | 5150  | 5160  | 5170   | 5185   |       |
|                                                                              | (4980) | TAT        | TCT   | GT    | -TAT  | GCT   | TACT  | ATG   | ATA    | CACT   | TCAAG |
|                                                                              | (4750) | CAT        | CA    | TAA   | TAA   | TAT   | CA    | TAA   | AACT   | AG     | GAAT  |
|                                                                              |        | Section 62 |       |       |       |       |       |       |        |        |       |
| SARS-CoV-2 Region 11168 - 29055 nt<br>Homo sapiens mitochondrion NC_012920.1 | (5186) | 5186       | 5200  | 5210  | 5220  | 5230  | 5240  | 5250  | 5260   | 5270   |       |
|                                                                              | (5062) | TCT        | TAC   | AGG   | CTGT  | TGG   | GGCT  | TG    | TGTT   | CTT    | TGCA  |
|                                                                              | (4835) | CC         | TCT   | GAC   | A--   | TCC   | GGC   | CTG   | C-     | TTCT   | CTCA  |
|                                                                              |        | Section 63 |       |       |       |       |       |       |        |        |       |
| SARS-CoV-2 Region 11168 - 29055 nt<br>Homo sapiens mitochondrion NC_012920.1 | (5271) | 5271       | 5280  | 5290  | 5300  | 5310  | 5320  | 5330  | 5340   | 5355   |       |
|                                                                              | (5146) | GT         | TG    | TAA   | TG    | CT    | GTTA  | CGAC  | CATG   | TCA    | -TAT  |
|                                                                              | (4909) | CC         | TCA   | CT    | AAA   | CG    | TAA   | GCTT  | CTCC   | TCA    | CTCT  |

SARS-CoV-2 + human DNA.apr

|                                                                              |        |            |             |         |       |         |         |          |        |          |       |           |        |          |       |         |          |            |             |       |       |        |      |      |     |     |     |     |   |   |   |     |    |   |   |   |   |   |   |
|------------------------------------------------------------------------------|--------|------------|-------------|---------|-------|---------|---------|----------|--------|----------|-------|-----------|--------|----------|-------|---------|----------|------------|-------------|-------|-------|--------|------|------|-----|-----|-----|-----|---|---|---|-----|----|---|---|---|---|---|---|
|                                                                              |        | Section 64 |             |         |       |         |         |          |        |          |       |           |        |          |       |         |          |            |             |       |       |        |      |      |     |     |     |     |   |   |   |     |    |   |   |   |   |   |   |
| SARS-CoV-2 Region 11168 - 29055 nt<br>Homo sapiens mitochondrion NC_012920.1 | (5356) | 5356       |             | 5370    |       | 5380    |         | 5390     |        | 5400     |       | 5410      |        | 5420     |       | 5430    |          | 5440       |             |       |       |        |      |      |     |     |     |     |   |   |   |     |    |   |   |   |   |   |   |
|                                                                              | (5230) | GTT-GTGA   | TGTCACAG-AT | GTGA    | CTCAA | CTTTAC  | TTAGGAG | GTATGA   | GCTATT | TATGT    | ATAAA | TCACATAAA | ACACCC | ATTAGT   | TTT   |         |          |            |             |       |       |        |      |      |     |     |     |     |   |   |   |     |    |   |   |   |   |   |   |
|                                                                              | (4992) | CTAC       | GCAAAA      | TCTTAG  | CAT   | ACTC    | CTCAA   | --       | TTAC   | CC       | ACATA | GGATGA    | ---    | ATA      | AATAG | CA      | GTTC     | TACCGTACAA | ACCC-TAACAT | TAA   |       |        |      |      |     |     |     |     |   |   |   |     |    |   |   |   |   |   |   |
|                                                                              |        | Section 65 |             |         |       |         |         |          |        |          |       |           |        |          |       |         |          |            |             |       |       |        |      |      |     |     |     |     |   |   |   |     |    |   |   |   |   |   |   |
| SARS-CoV-2 Region 11168 - 29055 nt<br>Homo sapiens mitochondrion NC_012920.1 | (5441) | 5441       |             | 5450    |       | 5460    |         | 5470     |        | 5480     |       | 5490      |        | 5500     |       | 5510    |          | 5525       |             |       |       |        |      |      |     |     |     |     |   |   |   |     |    |   |   |   |   |   |   |
|                                                                              | (5313) | CCATTG     | TGTGC       | TAATGG  | ACA   | AGTT    | TTTGGT  | TTAT     | ATA    | AAAA     | TAC   | ATGTGTTGG | TAG    | CGAT     | AATGT | TACT    | GACT     | TTTAA      | TGC         | AAT   | TG    |        |      |      |     |     |     |     |   |   |   |     |    |   |   |   |   |   |   |
|                                                                              | (5071) | CCATTCT    | ----        | TAATTTA | --    | ACTA    | TTT     | ATA      | TTAT   | CCT      | AA    | C-TAC     | -----  | TAC      | CGC   | -AT     | TCC      | TACT       | -ACT        | CA    | ACTTA | AACTC  |      |      |     |     |     |     |   |   |   |     |    |   |   |   |   |   |   |
|                                                                              |        | Section 66 |             |         |       |         |         |          |        |          |       |           |        |          |       |         |          |            |             |       |       |        |      |      |     |     |     |     |   |   |   |     |    |   |   |   |   |   |   |
| SARS-CoV-2 Region 11168 - 29055 nt<br>Homo sapiens mitochondrion NC_012920.1 | (5526) | 5526       |             | 5540    |       | 5550    |         | 5560     |        | 5570     |       | 5580      |        | 5590     |       | 5600    |          | 5610       |             |       |       |        |      |      |     |     |     |     |   |   |   |     |    |   |   |   |   |   |   |
|                                                                              | (5398) | CAACA      | TGT-GAC     | TGGACA  | AAAT  | GCTGGTG | A       | TTACA    | TTTT   | AGCTAACA | CC    | TG        | TACT   | GAA      | AGA   | CTCA    | AAGCTTTT | TTGCAG     | CAGAA       | ACGC  |       |        |      |      |     |     |     |     |   |   |   |     |    |   |   |   |   |   |   |
|                                                                              | (5138) | CAGCA      | CCAC        | GAC     | CCT   | ACT     | ACT     | TATCTCGC | A      | CC       | TGA   | AA        | CA     | AGCTAACA | --    | TG      | -ACT     | A          | ACC         | CTTAA | ----- | TTCCAT | CC-- | ACC  |     |     |     |     |   |   |   |     |    |   |   |   |   |   |   |
|                                                                              |        | Section 67 |             |         |       |         |         |          |        |          |       |           |        |          |       |         |          |            |             |       |       |        |      |      |     |     |     |     |   |   |   |     |    |   |   |   |   |   |   |
| SARS-CoV-2 Region 11168 - 29055 nt<br>Homo sapiens mitochondrion NC_012920.1 | (5611) | 5611       |             | 5620    |       | 5630    |         | 5640     |        | 5650     |       | 5660      |        | 5670     |       | 5680    |          | 5695       |             |       |       |        |      |      |     |     |     |     |   |   |   |     |    |   |   |   |   |   |   |
|                                                                              | (5482) | TC         | AAAG        | CTACTG  | AGGAG | ACAT    | TTAAA   | CTGT     | CTTA   | TGG      | TATT  | GCTAG     | TGTA   | CGTG     | AAGT  | GCTGT   | CTGA     | CAG        | AGA         | ATT   | CA    | TCTTT  | C    |      |     |     |     |     |   |   |   |     |    |   |   |   |   |   |   |
|                                                                              | (5212) | TC         | CT--        | CTC     | CCT   | AGGAG   | GC      | CT       | GCCCC  | CG--     | CTA   | ACC       | GGC    | TTT      | TG    | C       | CA       | A----      | AT          | G     | G     | C      | AT   | -TAT | C   | G   | A   | G   | A | A | T | -CA | C  | A | A | A | A | A |   |
|                                                                              |        | Section 68 |             |         |       |         |         |          |        |          |       |           |        |          |       |         |          |            |             |       |       |        |      |      |     |     |     |     |   |   |   |     |    |   |   |   |   |   |   |
| SARS-CoV-2 Region 11168 - 29055 nt<br>Homo sapiens mitochondrion NC_012920.1 | (5696) | 5696       |             | 5710    |       | 5720    |         | 5730     |        | 5740     |       | 5750      |        | 5760     |       | 5770    |          | 5780       |             |       |       |        |      |      |     |     |     |     |   |   |   |     |    |   |   |   |   |   |   |
|                                                                              | (5567) | ATGGGA     | AGTTGG      | TAA     | CC    | TAGA    | CCACCA  | -CT      | TAA    | CC       | GAA   | AT        | TATG   | -TCT     | TTA   | CTGGT   | TAT      | CGT        | G           | TAA   | CTA   | AAAA   | AC   | AGT  | TAA | AGT | TAC |     |   |   |   |     |    |   |   |   |   |   |   |
|                                                                              | (5287) | ACAAT      | AGCC        | T       | CAT   | CAT     | CC----  | CCACCA   | T      | CATAG    | CC    | ACC       | AT     | C        | CCC   | T       | C        | TTA        | ACCTC       | TA    | -CT   | T      | C    | T    | A   | C   | T   | A   | C | G | C | T   | AA | T | C | T | A | C | T |
|                                                                              |        | Section 69 |             |         |       |         |         |          |        |          |       |           |        |          |       |         |          |            |             |       |       |        |      |      |     |     |     |     |   |   |   |     |    |   |   |   |   |   |   |
| SARS-CoV-2 Region 11168 - 29055 nt<br>Homo sapiens mitochondrion NC_012920.1 | (5781) | 5781       |             | 5790    |       | 5800    |         | 5810     |        | 5820     |       | 5830      |        | 5840     |       | 5850    |          | 5865       |             |       |       |        |      |      |     |     |     |     |   |   |   |     |    |   |   |   |   |   |   |
|                                                                              | (5650) | AAAT--     | AGGAG       | AGTAC   | CC    | T--T    | TG-     | AAAA     | AGT    | GACT     | AT    | GGTGATG   | CT     | GTT      | G     | TTT     | AC       | CGAGG      | TACAA       | CA    | AC    | TTA    | C    | AA   | ATT | AAA |     |     |   |   |   |     |    |   |   |   |   |   |   |
|                                                                              | (5367) | ACC        | TCA         | ATC     | AC    | AC      | TACT    | CC       | CATA   | TCT      | AA    | CAAC      | GT     | AAAA     | AT    | AAAA    | TGA      | CAGTT      | -TGA        | ACA   | ----  | TACAA  | AA   | C    | CAC | CCC | ATT | CC- |   |   |   |     |    |   |   |   |   |   |   |
|                                                                              |        | Section 70 |             |         |       |         |         |          |        |          |       |           |        |          |       |         |          |            |             |       |       |        |      |      |     |     |     |     |   |   |   |     |    |   |   |   |   |   |   |
| SARS-CoV-2 Region 11168 - 29055 nt<br>Homo sapiens mitochondrion NC_012920.1 | (5866) | 5866       |             | 5880    |       | 5890    |         | 5900     |        | 5910     |       | 5920      |        | 5930     |       | 5940    |          | 5950       |             |       |       |        |      |      |     |     |     |     |   |   |   |     |    |   |   |   |   |   |   |
|                                                                              | (5729) | TGTTGGTGA  | TTAT        | TTT     | TGCT  | GACAT   | CACA    | TACAG    | TAA    | TGCCAT   | TAA   | GTG       | CACC   | TAC      | ACTAG | TGCCACA | AGAG     | C          | ACT         | T     | T     | G      | T    | T    | A   | G   | A   |     |   |   |   |     |    |   |   |   |   |   |   |
|                                                                              | (5446) | TCCCCACAC  | TCAT        | C--     | GCC   | CTAC    | CAGG    | -TAC     | --     | TCC      | TACC  | TAT       | CTCCC  | CTTT     | TAT   | ACTA    | ATAAT    | CTT        | AT          | AGA   | A     | ATT    | T    | A    | G   | T   | T   | A   |   |   |   |     |    |   |   |   |   |   |   |

SARS-CoV-2 + human DNA.apr

|                                        |        |            |           |          |       |        |            |          |         |         |       |       |        |        |       |           |          |         |         |         |       |       |     |       |       |     |
|----------------------------------------|--------|------------|-----------|----------|-------|--------|------------|----------|---------|---------|-------|-------|--------|--------|-------|-----------|----------|---------|---------|---------|-------|-------|-----|-------|-------|-----|
|                                        |        | Section 71 |           |          |       |        |            |          |         |         |       |       |        |        |       |           |          |         |         |         |       |       |     |       |       |     |
|                                        |        | (5951)     | 5951      | 5960     | 5970  | 5980   | 5990       | 6000     | 6010    | 6020    | 6035  |       |        |        |       |           |          |         |         |         |       |       |     |       |       |     |
| SARS-CoV-2 Region 11168 - 29055 nt     | (5814) | AT         | TACTGGCTT | ATACCCAA | CAC   | TCTAA  | TATCTCAGAT | GAGTTT   | CTCTA   | GCAATGT | TGC   | AAAT  | TATATC | AAAAG  | TTGG  | TATGCAAAA | G        |         |         |         |       |       |     |       |       |     |
| Homo sapiens mitochondrion NC_012920.1 | (5526) | AA         | TACAGAC   | CAAGAGCC | TTCA  | ---    | AA         | GCCCTCAG | -TAAGTT | ----    | GCAAT | AC    | TTA    | ATT    | TCTGT | AA        | CAGCTAA  | GGAC    | TGCAAAA | -       |       |       |     |       |       |     |
|                                        |        | Section 72 |           |          |       |        |            |          |         |         |       |       |        |        |       |           |          |         |         |         |       |       |     |       |       |     |
|                                        |        | (6036)     | 6036      | 6050     | 6060  | 6070   | 6080       | 6090     | 6100    | 6110    | 6120  |       |        |        |       |           |          |         |         |         |       |       |     |       |       |     |
| SARS-CoV-2 Region 11168 - 29055 nt     | (5898) | TATT       | CTACACTC  | CAGG     | AC    | CACCTG | GTAC       | TGGTA    | AGAGT   | CA      | TTT   | GCTAT | TG     | GCCT   | AGC   | TCT       | TACTA    | CCCTTC  | TG      | CTCGCAT | AG    |       |     |       |       |     |
| Homo sapiens mitochondrion NC_012920.1 | (5601) | ----       | CCC       | CACTC    | T--   | GAT    | CAACTGA    | -AC      | GCAA    | ATCAG   | CAC   | TTTAA | T-TAA  | GC     | TAAGC | TAAGC     | CT-TACTA | GAC     | CAATG   | GG----  | AC    |       |     |       |       |     |
|                                        |        | Section 73 |           |          |       |        |            |          |         |         |       |       |        |        |       |           |          |         |         |         |       |       |     |       |       |     |
|                                        |        | (6121)     | 6121      | 6130     | 6140  | 6150   | 6160       | 6170     | 6180    | 6190    | 6205  |       |        |        |       |           |          |         |         |         |       |       |     |       |       |     |
| SARS-CoV-2 Region 11168 - 29055 nt     | (5983) | TGT        | ATA       | CAGCT    | TTGCT | CTCAT  | GCCGCT     | GTTGAT   | GCAC    | TATG    | -TG   | AGAA  | GGCAT  | TTAAAA | TATTT | ----      | GCC      | TATAG   | --      | AT      | AAAT  | GT    |     |       |       |     |
| Homo sapiens mitochondrion NC_012920.1 | (5672) | TTA        | AAC       | CCAG     | AAA   | CACT   | TA         | GT       | TAA     | CAG     | CTAA  | -GCAC | CC     | TAA    | TCA   | AACT      | GGCT     | TCAA    | TCTA    | CTCTCC  | GCC   | GCCG  | GGA | AAAA  | GG    | C   |
|                                        |        | Section 74 |           |          |       |        |            |          |         |         |       |       |        |        |       |           |          |         |         |         |       |       |     |       |       |     |
|                                        |        | (6206)     | 6206      | 6220     | 6230  | 6240   | 6250       | 6260     | 6270    | 6280    | 6290  |       |        |        |       |           |          |         |         |         |       |       |     |       |       |     |
| SARS-CoV-2 Region 11168 - 29055 nt     | (6060) | A          | G         | TAGAA    | TTATA | CC     | TGCA       | CGT      | GCTCG   | TG      | TAG   | AGT   | GTTT   | TGAT   | AA    | ATTCA     | AA       | GTGAA   | TTCAAC  | AT      | TAGAA | CAGTA | TGT | CTTT  | GTA   |     |
| Homo sapiens mitochondrion NC_012920.1 | (5756) | G          | G         | AGAA     | GCC-- | CG     | GCA        | GGT      | T----   | TG      | AAG   | CTGC  | TTCT   | TCG    | AA    | TTTGC     | AA       | -----   | TTCAA   | TATG    | AAAA  | ----- | TCA | CT    | CG    | GAG |
|                                        |        | Section 75 |           |          |       |        |            |          |         |         |       |       |        |        |       |           |          |         |         |         |       |       |     |       |       |     |
|                                        |        | (6291)     | 6291      | 6300     | 6310  | 6320   | 6330       | 6340     | 6350    | 6360    | 6375  |       |        |        |       |           |          |         |         |         |       |       |     |       |       |     |
| SARS-CoV-2 Region 11168 - 29055 nt     | (6145) | CTG        | TAA       | TGCATT   | GCCT  | GAG    | GACAG      | CAGAT    | ATAGT   | TGTC    | TTT   | GATG  | AA     | ATTT   | CAAT  | G         | CCACAA   | AATT    | ATG     | ATT     | TGAGT | GTT   | G   | T     |       |     |
| Homo sapiens mitochondrion NC_012920.1 | (5825) | CTG        | GT        | AAAAGAG  | GCCT  | A      | CC         | C-----   | -----   | -----   | ----- | TGTC  | TTT    | ----   | AG    | ATTT      | ACA      | -GT     | CCA     | -----   | ATG   | CTT   | CAC | ----- | T     |     |
|                                        |        | Section 76 |           |          |       |        |            |          |         |         |       |       |        |        |       |           |          |         |         |         |       |       |     |       |       |     |
|                                        |        | (6376)     | 6376      | 6390     | 6400  | 6410   | 6420       | 6430     | 6440    | 6450    | 6460  |       |        |        |       |           |          |         |         |         |       |       |     |       |       |     |
| SARS-CoV-2 Region 11168 - 29055 nt     | (6230) | CA         | AT        | GCCA     | GAT   | TTAC   | GT         | GCTAAG   | CACT    | -ATGT   | GTACA | TT    | GG     | CGACC  | CT    | GCTCA     | ATTAC    | CTG     | CACC    | ACG     | CACAT | TGCTA | ACT | AAG   | GG    |     |
| Homo sapiens mitochondrion NC_012920.1 | (5879) | CA         | --        | GCCA     | TT    | TTAC   | CT         | CACCCC   | CACT    | GATGT   | ----- | TC    | GC     | CGACC  | GT    | TGA       | CTATT    | CTCTACA | --      | AAC     | CACA  | AAG   | --- | AC    | -ATT  | GG  |
|                                        |        | Section 77 |           |          |       |        |            |          |         |         |       |       |        |        |       |           |          |         |         |         |       |       |     |       |       |     |
|                                        |        | (6461)     | 6461      | 6470     | 6480  | 6490   | 6500       | 6510     | 6520    | 6530    | 6545  |       |        |        |       |           |          |         |         |         |       |       |     |       |       |     |
| SARS-CoV-2 Region 11168 - 29055 nt     | (6314) | C          | ACACTA    | GAA      | CAGAA | TATT   | TCA        | ATTC     | AGT     | TGT     | TAGA  | CT    | TAT    | GAAAA  | CTA   | TAGG      | TC       | CAG     | ACAT    | TGTT    | CCTC  | GGAA  | CTT | G     | TCGG  | CGT |
| Homo sapiens mitochondrion NC_012920.1 | (5951) | A          | ACACTA    | TAC      | ----- | TATT   | ---        | ATTC     | GG      | CG      | CAT   | TGAG  | CT     | G--    | GAGTC | CTA       | --       | GGCA    | CAG     | CTCTAAG | CCTC  | ----  | CTT | AT    | ----- | -   |

SARS-CoV-2 + human DNA.apr

|                                        |        |            |      |      |      |      |     |      |     |      |      |      |       |       |       |       |       |       |     |      |     |     |     |    |     |     |     |      |      |      |      |      |     |      |     |      |     |     |      |      |      |   |
|----------------------------------------|--------|------------|------|------|------|------|-----|------|-----|------|------|------|-------|-------|-------|-------|-------|-------|-----|------|-----|-----|-----|----|-----|-----|-----|------|------|------|------|------|-----|------|-----|------|-----|-----|------|------|------|---|
|                                        |        | Section 78 |      |      |      |      |     |      |     |      |      |      |       |       |       |       |       |       |     |      |     |     |     |    |     |     |     |      |      |      |      |      |     |      |     |      |     |     |      |      |      |   |
|                                        | (6546) | 6546       |      | 6560 |      | 6570 |     | 6580 |     | 6590 |      | 6600 |       | 6610  |       | 6620  |       | 6630  |     |      |     |     |     |    |     |     |     |      |      |      |      |      |     |      |     |      |     |     |      |      |      |   |
| SARS-CoV-2 Region 11168 - 29055 nt     | (6399) | TG         | TC   | CT   | GC   | TG   | AA  | TT   | GT  | TG   | ACA  | CT   | GT    | GA    | GT    | GC    | TT    | GG    | TT  | AT   | GA  | TAA | TA  | AG | CTT | AA  | AG  | CACA | TAA  | AG   | GACA | AA   | TC  | AG   | CT  | CA   | AT  | GC  | T    |      |      |   |
| Homo sapiens mitochondrion NC_012920.1 | (6014) | --         | TC   | GA   | GC   | GA   | GC  | TG   | GG  | CC   | AG   | CA   | GG    | CA    | AC    | CT    | TC    | TA    | GG  | TA   | AC  | CA  | CC  | AC | AT  | CT  | TAC | AA   | CG   | T--- | TA   | TC   | GT  | CA   | AG  | CC   | CA  | TG  | CA   | TT   | TG   |   |
|                                        |        | Section 79 |      |      |      |      |     |      |     |      |      |      |       |       |       |       |       |       |     |      |     |     |     |    |     |     |     |      |      |      |      |      |     |      |     |      |     |     |      |      |      |   |
|                                        | (6631) | 6631       |      | 6640 |      | 6650 |     | 6660 |     | 6670 |      | 6680 |       | 6690  |       | 6700  |       | 6715  |     |      |     |     |     |    |     |     |     |      |      |      |      |      |     |      |     |      |     |     |      |      |      |   |
| SARS-CoV-2 Region 11168 - 29055 nt     | (6484) | TT         | AAA  | AT   | GTT  | TT   | TAT | TA   | AGG | GT   | GT   | TAT  | C     | ACG   | CAT   | GAT   | --    | GTT   | CAT | CT   | G   | CAA | T   | T  | AC  | AG  | --  | CC   | A    | CAA  | TA   | AGG  | CG  | TG   | TA  | AGA  | GA  | AT  |      |      |      |   |
| Homo sapiens mitochondrion NC_012920.1 | (6094) | TA         | AT   | AAT  | CT   | TT   | CT  | T    | CA  | TA   | GT   | AA   | T     | AC    | CC    | AT    | CAT   | AAT   | CG  | GAG  | GT  | TT  | TG  | G  | CAA | CT  | G   | AC   | TAG  | TT   | CC   | C    | TA  | AATA | AT  | CG   | GT  | G   | CCCC | GATA |      |   |
|                                        |        | Section 80 |      |      |      |      |     |      |     |      |      |      |       |       |       |       |       |       |     |      |     |     |     |    |     |     |     |      |      |      |      |      |     |      |     |      |     |     |      |      |      |   |
|                                        | (6716) | 6716       |      | 6730 |      | 6740 |     | 6750 |     | 6760 |      | 6770 |       | 6780  |       | 6790  |       | 6800  |     |      |     |     |     |    |     |     |     |      |      |      |      |      |     |      |     |      |     |     |      |      |      |   |
| SARS-CoV-2 Region 11168 - 29055 nt     | (6565) | T          | C    | CT   | TACA | CGT  | TAA | CCCT | GCT | TGG  | AG   | AAA  | AG    | CT    | GT    | CTTT  | ATT   | T     | CA  | CCTT | TAT | TA  | TC  | AC | GA  | ATG | CT  | G    | TAG  | CCT  | CAA  | AGAT | TTT | TG   | GG  |      |     |     |      |      |      |   |
| Homo sapiens mitochondrion NC_012920.1 | (6178) | TGG        | ---- | CGT  | TT   | CCCC | GC  | ATA  | TAA | A    | CAA  | CA   | ----- | ----- | ----- | ----- | ----- | ----- | TA  | AG   | GTT | CT  | GA  | CT | TT  | A   | CCT | CC   | CT   | CT   | TCT  | CCT  | AC  | ---- | TC  | CG   | --- |     |      |      |      |   |
|                                        |        | Section 81 |      |      |      |      |     |      |     |      |      |      |       |       |       |       |       |       |     |      |     |     |     |    |     |     |     |      |      |      |      |      |     |      |     |      |     |     |      |      |      |   |
|                                        | (6801) | 6801       |      | 6810 |      | 6820 |     | 6830 |     | 6840 |      | 6850 |       | 6860  |       | 6870  |       | 6885  |     |      |     |     |     |    |     |     |     |      |      |      |      |      |     |      |     |      |     |     |      |      |      |   |
| SARS-CoV-2 Region 11168 - 29055 nt     | (6650) | A          | CT   | AC   | CA   | ACT  | CAA | ACT  | GT  | T    | GATT | C    | AT    | CA    | CAG   | GG    | CT    | CAG   | AAT | TAT  | GA  | CT  | AT  | GT | CA  | TAT | T   | CA   | CT   | CAA  | AC   | CA   | CT  | GAA  | AC  | AG   | CT  | C   | ACT  | C    | T    |   |
| Homo sapiens mitochondrion NC_012920.1 | (6240) | -          | CT   | CG   | CA   | CT   | GCT | ATA  | GT  | G    | GA   | GG   | C     | GG    | A     | GC    | AA    | GG    | AA  | CAG  | GT  | T   | --  | GA | ACA | -   | GTC | -    | TACC | CT   | CC   | TT   | AG  | CA   | GG  | GAA  | CT  | ACT | C    | CACC | C    |   |
|                                        |        | Section 82 |      |      |      |      |     |      |     |      |      |      |       |       |       |       |       |       |     |      |     |     |     |    |     |     |     |      |      |      |      |      |     |      |     |      |     |     |      |      |      |   |
|                                        | (6886) | 6886       |      | 6900 |      | 6910 |     | 6920 |     | 6930 |      | 6940 |       | 6950  |       | 6960  |       | 6970  |     |      |     |     |     |    |     |     |     |      |      |      |      |      |     |      |     |      |     |     |      |      |      |   |
| SARS-CoV-2 Region 11168 - 29055 nt     | (6735) | TG         | TAA  | TG   | TAA  | AC   | AGA | TT   | TAA | TGT  | TGC  | TAT  | TACC  | AG    | AG    | CAA   | AA    | AG    | TAG | G    | CAT | A   | CT  | T  | TGC | ATA | AT  | GT   | CT   | GAT  | AG   | AG   | AC  | C    | T   | T    | ATG | ACA |      |      |      |   |
| Homo sapiens mitochondrion NC_012920.1 | (6320) | TG         | G    | AG   | CC   | T    | CCG | T    | AGA | CC   | TAA  | CCA  | T     | CT    | T     | CT    | CTT   | AC    | CA  | CT   | AG  | C   | AG  | GT | T   | CT  | C   | TAT  | CT   | T    | AG   | GG   | CC  | AT   | CA  | ATTT | CAT | CA  | ACA  |      |      |   |
|                                        |        | Section 83 |      |      |      |      |     |      |     |      |      |      |       |       |       |       |       |       |     |      |     |     |     |    |     |     |     |      |      |      |      |      |     |      |     |      |     |     |      |      |      |   |
|                                        | (6971) | 6971       |      | 6980 |      | 6990 |     | 7000 |     | 7010 |      | 7020 |       | 7030  |       | 7040  |       | 7055  |     |      |     |     |     |    |     |     |     |      |      |      |      |      |     |      |     |      |     |     |      |      |      |   |
| SARS-CoV-2 Region 11168 - 29055 nt     | (6820) | AG         | T    | TG   | CAAT | T    | TAC | AA   | GT  | CT   | -    | TG   | AA    | AT    | T     | -     | CC    | ACG   | TAG | GA   | AT  | TGT | GG  | G  | AA  | CTT | --  | TACA | AG   | CT   | GA   | --   | AA  | AT   | GT  | AA   | CAG | GA  | CT   | CT   | TT   | A |
| Homo sapiens mitochondrion NC_012920.1 | (6405) | AT         | TAT  | CAAT | ATA  | TAA  | AA  | CC   | CC  | TG   | CC   | AT   | AA    | CC    | CAA   | TA    | CC    | AA    | AC  | GCC  | CT  | CTT | CG  | T  | CT  | GAT | C   | CG   | T    | CCT  | AA   | TC   | AC  | AG   | CAG | TC   | CT  | ACT | TT   | C    |      |   |
|                                        |        | Section 84 |      |      |      |      |     |      |     |      |      |      |       |       |       |       |       |       |     |      |     |     |     |    |     |     |     |      |      |      |      |      |     |      |     |      |     |     |      |      |      |   |
|                                        | (7056) | 7056       |      | 7070 |      | 7080 |     | 7090 |     | 7100 |      | 7110 |       | 7120  |       | 7130  |       | 7140  |     |      |     |     |     |    |     |     |     |      |      |      |      |      |     |      |     |      |     |     |      |      |      |   |
| SARS-CoV-2 Region 11168 - 29055 nt     | (6898) | AAG        | AT   | TG   | TAG  | TAA  | AG  | GT   | AA  | T    | CA   | CTG  | GG    | T     | TA    | CATG  | -     | CTA   | CAC | AGGC | AC  | CT  | ACA | C  | ACC | T   | CAG | TG   | T    | TG   | AC   | AC   | T   | AAA  | TT  | C    | AAA | ACT | TGA  | AG   |      |   |
| Homo sapiens mitochondrion NC_012920.1 | (6490) | TC         | CT   | AT   | CT   | CT   | CCC | AG   | T   | CC   | TAG  | CTG  | C     | -     | TGG   | CATG  | A     | CTA   | T   | AG   | T   | --- | AG  | TA | ACA | G   | ACC | G    | CA   | ACC  | T    | CA   | AC  | AC   | C   | ACC  | TT  | C   | TT   | CG   | ACCC | G |

SARS-CoV-2 + human DNA.apr

|                                                                              |        |                                                                                      |                                                                                    |      |      |      |      |      |      |      |  |
|------------------------------------------------------------------------------|--------|--------------------------------------------------------------------------------------|------------------------------------------------------------------------------------|------|------|------|------|------|------|------|--|
|                                                                              |        | Section 85                                                                           |                                                                                    |      |      |      |      |      |      |      |  |
| SARS-CoV-2 Region 11168 - 29055 nt<br>Homo sapiens mitochondrion NC_012920.1 | (7141) | 7141                                                                                 | 7150                                                                               | 7160 | 7170 | 7180 | 7190 | 7200 | 7210 | 7225 |  |
|                                                                              | (6982) | GTTTATGTGTGACATACCTGGCATACCTAAGGACATGACCTATAGAAGACTCA-TCTCTATGATGGGTTTAAAAATGAATTATC |                                                                                    |      |      |      |      |      |      |      |  |
|                                                                              |        | (6571)                                                                               | CCGGAGGAGGAGACCC-CACTCTATACCAAC--ACCTATTCT--GATTTTTCGGTCACCCGAGATTATATTCTTATCCTACC |      |      |      |      |      |      |      |  |
|                                                                              |        | Section 86                                                                           |                                                                                    |      |      |      |      |      |      |      |  |
| SARS-CoV-2 Region 11168 - 29055 nt<br>Homo sapiens mitochondrion NC_012920.1 | (7226) | 7226                                                                                 | 7240                                                                               | 7250 | 7260 | 7270 | 7280 | 7290 | 7300 | 7310 |  |
|                                                                              | (7066) | AAGTTAATGTTACCTAACATGTTTATCACCCGCGAAGAAAGCTATAAGACATGTACGTGCATGGATTGGCTTCGATGTCGAGGG |                                                                                    |      |      |      |      |      |      |      |  |
|                                                                              | (6650) | AGGCTTCGGAAATCTCCCATATTG-TAACCTTACTCCGGAAGAAAAGAACCAATTGGATACATAGGTAT-----G          |                                                                                    |      |      |      |      |      |      |      |  |
|                                                                              |        | Section 87                                                                           |                                                                                    |      |      |      |      |      |      |      |  |
| SARS-CoV-2 Region 11168 - 29055 nt<br>Homo sapiens mitochondrion NC_012920.1 | (7311) | 7311                                                                                 | 7320                                                                               | 7330 | 7340 | 7350 | 7360 | 7370 | 7380 | 7395 |  |
|                                                                              | (7151) | GTGTCATGCTACTAGAGAAGCTGTGGTACCAATTATCTTTACAGCTAGGTTTTCTACAGGTGTTAACCC---TAGTTGCTGTAT |                                                                                    |      |      |      |      |      |      |      |  |
|                                                                              | (6723) | GTCTGA-GCTA-----TGATACTAATTGGCTTC-----CTAGGTTTTATCGTGTGAGCACACCATAATTTACAGTA         |                                                                                    |      |      |      |      |      |      |      |  |
|                                                                              |        | Section 88                                                                           |                                                                                    |      |      |      |      |      |      |      |  |
| SARS-CoV-2 Region 11168 - 29055 nt<br>Homo sapiens mitochondrion NC_012920.1 | (7396) | 7396                                                                                 | 7410                                                                               | 7420 | 7430 | 7440 | 7450 | 7460 | 7470 | 7480 |  |
|                                                                              | (7233) | CCTACAGGTTATGTTGATACACCTA-ATAATACAGATTT--TTCCAGAGTTAGTGCTAAACC-ACCGCTGGAGATCAATT---  |                                                                                    |      |      |      |      |      |      |      |  |
|                                                                              | (6789) | GGAATAG---ACGTAGACACACGAGCATATTCACTCCGCTACCAATAATCATCTGCTATCCACCAGGCTCAAGTATTAGCT    |                                                                                    |      |      |      |      |      |      |      |  |
|                                                                              |        | Section 89                                                                           |                                                                                    |      |      |      |      |      |      |      |  |
| SARS-CoV-2 Region 11168 - 29055 nt<br>Homo sapiens mitochondrion NC_012920.1 | (7481) | 7481                                                                                 | 7490                                                                               | 7500 | 7510 | 7520 | 7530 | 7540 | 7550 | 7565 |  |
|                                                                              | (7311) | -AAACACCTCATACCACTTATGTACAAAGGACTTCCTTGGAATGTAGTGCATATAAGATTGTACAAATGTTAAGTGACACACTT |                                                                                    |      |      |      |      |      |      |      |  |
|                                                                              | (6871) | GACTCGCCACACTCCACGGAAGCAATATGAATATGATCTGC--TGAGTGCCTCTAGAGCCCTAGGATTCTTTCTTTTCAACGTA |                                                                                    |      |      |      |      |      |      |      |  |
|                                                                              |        | Section 90                                                                           |                                                                                    |      |      |      |      |      |      |      |  |
| SARS-CoV-2 Region 11168 - 29055 nt<br>Homo sapiens mitochondrion NC_012920.1 | (7566) | 7566                                                                                 | 7580                                                                               | 7590 | 7600 | 7610 | 7620 | 7630 | 7640 | 7650 |  |
|                                                                              | (7395) | AAAAATCTCTCTGACAGAGTCTGTTTGTCTTATGGGCACATGGCTTTG-AGTTGACATCTATGAAGTATTTTGTGAAAATAGGA |                                                                                    |      |      |      |      |      |      |      |  |
|                                                                              | (6954) | GGTGGCCTGACTGCTGTTGTTATTAAGCAAACTCAT---CACTAGACATCTGTACTACACGAC-ACGTACTACGTTGT-----A |                                                                                    |      |      |      |      |      |      |      |  |
|                                                                              |        | Section 91                                                                           |                                                                                    |      |      |      |      |      |      |      |  |
| SARS-CoV-2 Region 11168 - 29055 nt<br>Homo sapiens mitochondrion NC_012920.1 | (7651) | 7651                                                                                 | 7660                                                                               | 7670 | 7680 | 7690 | 7700 | 7710 | 7720 | 7735 |  |
|                                                                              | (7479) | CTGAGCGACCTGTGTCTATGTGATAGACGTGCCACAATGCTTTTCCACT--GCTTCAGACACTTATGCTGTGTGGCATCAATTC |                                                                                    |      |      |      |      |      |      |      |  |
|                                                                              | (7026) | GCCACTTCACTATGTCCTATCA-ATAGGAGCTGTATTGTCATCATAGGAGGCTTCATTCACTGATTTCCCCATTTCACAGGC   |                                                                                    |      |      |      |      |      |      |      |  |

SARS-CoV-2 + human DNA.apr

|                                        |        |                                                                                         |      |      |      |      |      |      |      |      |      |
|----------------------------------------|--------|-----------------------------------------------------------------------------------------|------|------|------|------|------|------|------|------|------|
|                                        |        | Section 92                                                                              |      |      |      |      |      |      |      |      |      |
|                                        |        | (7736)                                                                                  | 7736 | 7750 | 7760 | 7770 | 7780 | 7790 | 7800 | 7810 | 7820 |
| SARS-CoV-2 Region 11168 - 29055 nt     | (7562) | TAT----TGATTGAT-TACGTCTATAATCCGTTTATGATTGATGTTCAACAATGGGTTTTACAGGTAACCTACAAAGCAAC       |      |      |      |      |      |      |      |      |      |
| Homo sapiens mitochondrion NC_012920.1 | (7110) | TACACCCTAGACCAAAACCACGCGAA-AATCCATTTCACTATCATATTTCATC---GGCGT---AAATCTAACCTTCTTCCCA--C  |      |      |      |      |      |      |      |      |      |
|                                        |        | Section 93                                                                              |      |      |      |      |      |      |      |      |      |
|                                        |        | (7821)                                                                                  | 7821 | 7830 | 7840 | 7850 | 7860 | 7870 | 7880 | 7890 | 7905 |
| SARS-CoV-2 Region 11168 - 29055 nt     | (7642) | ATGATCTGTATTGTCAAGTCCATGGTAATGCACATGTAGCTAGTTGTGATGCAATCATGACTAGAGGTGTCTAGCTGTCCACGAGTG |      |      |      |      |      |      |      |      |      |
| Homo sapiens mitochondrion NC_012920.1 | (7186) | AACA-CTTCTCGGCTACTCC---GGAATGCCG-GACGTTACTCGGACTACCCCGATGCAATA-----CACCACTGAAC          |      |      |      |      |      |      |      |      |      |
|                                        |        | Section 94                                                                              |      |      |      |      |      |      |      |      |      |
|                                        |        | (7906)                                                                                  | 7906 | 7920 | 7930 | 7940 | 7950 | 7960 | 7970 | 7980 | 7990 |
| SARS-CoV-2 Region 11168 - 29055 nt     | (7727) | CTTTGTTAAGCGTGTGACTGGACTATTGAATATCCTATAATTGTTGATGAAGTGAAGATTAAATGCGGCCTGTAGAAAGGTTCAA   |      |      |      |      |      |      |      |      |      |
| Homo sapiens mitochondrion NC_012920.1 | (7257) | ATCCTATCATCT-FGTAGGCTC----ATTCACTTCTCTAACAGCAGTAAATATTAATAATTTCATGA---TTTGAGAAAGCCTTG-  |      |      |      |      |      |      |      |      |      |
|                                        |        | Section 95                                                                              |      |      |      |      |      |      |      |      |      |
|                                        |        | (7991)                                                                                  | 7991 | 8000 | 8010 | 8020 | 8030 | 8040 | 8050 | 8060 | 8075 |
| SARS-CoV-2 Region 11168 - 29055 nt     | (7812) | CAGATGGTTGTTAAAGCTGCAATATTAGCAGACAAATTTCCAGTTCCTCACGACATTGGTAACCTAAAGCTATTAAAGTG--TGT   |      |      |      |      |      |      |      |      |      |
| Homo sapiens mitochondrion NC_012920.1 | (7333) | --CTTCGAAGCGAAAGTCC--TAATAGTAGAAGAA--CCC-----TCCA-----TAAACCTGGAGTGACTATATGGATGC        |      |      |      |      |      |      |      |      |      |
|                                        |        | Section 96                                                                              |      |      |      |      |      |      |      |      |      |
|                                        |        | (8076)                                                                                  | 8076 | 8090 | 8100 | 8110 | 8120 | 8130 | 8140 | 8150 | 8160 |
| SARS-CoV-2 Region 11168 - 29055 nt     | (7895) | ACCTCAAGCTGATGTAGAAATGGAAGTTCTATGATGCACAGCCTTGTAGTGACAAAAGCTTATAAAATAGAGAAATTATCTATTCT  |      |      |      |      |      |      |      |      |      |
| Homo sapiens mitochondrion NC_012920.1 | (7398) | CCCACACCTACCACACATTCGAAGAAACCGTATACATA-----AAATCT-AGACAAAAGAGAAAGGAATCGAACC             |      |      |      |      |      |      |      |      |      |
|                                        |        | Section 97                                                                              |      |      |      |      |      |      |      |      |      |
|                                        |        | (8161)                                                                                  | 8161 | 8170 | 8180 | 8190 | 8200 | 8210 | 8220 | 8230 | 8245 |
| SARS-CoV-2 Region 11168 - 29055 nt     | (7980) | TATGCCACCATCTCTGACAAATTCACAG-ATGG--TGTATGCCATTTTTGGAAATTCAGATGTCGATAGATATCCCTGCTAAATCCA |      |      |      |      |      |      |      |      |      |
| Homo sapiens mitochondrion NC_012920.1 | (7469) | C---CCAAAGCTGGTTTCAAGCCACACCCATGGCTCCATGACT-TTTTCAAAAAGGTAT-TAGAAAACCAATTTCATAACTTTG    |      |      |      |      |      |      |      |      |      |
|                                        |        | Section 98                                                                              |      |      |      |      |      |      |      |      |      |
|                                        |        | (8246)                                                                                  | 8246 | 8260 | 8270 | 8280 | 8290 | 8300 | 8310 | 8320 | 8330 |
| SARS-CoV-2 Region 11168 - 29055 nt     | (8062) | TTGTTTGTAATTGACACTAGTGTCTATCTAACCTTAACTTGCCTGGTTGTGATGTTGGCAGTTTGTATGTAAATAAACATGC      |      |      |      |      |      |      |      |      |      |
| Homo sapiens mitochondrion NC_012920.1 | (7549) | TCAAAGTTAAATTATAGGCTAA-TCCCTATATATC-TTAAATGGCAGATGCAAGGTAG--GTCTACAGACGCTACTTCCC        |      |      |      |      |      |      |      |      |      |

SARS-CoV-2 + human DNA.apr

|                                        |        |            |      |      |      |      |      |      |      |      |      |    |   |   |   |   |   |   |   |   |   |   |   |   |   |   |   |   |   |   |   |   |   |   |   |   |   |   |   |   |   |   |   |   |   |   |   |   |   |   |   |   |    |   |   |   |   |   |   |   |   |   |   |   |   |   |   |   |   |   |   |   |   |   |   |   |   |   |   |   |   |   |   |   |   |   |   |   |   |   |   |   |   |   |   |   |   |   |   |   |   |   |   |   |   |   |   |   |   |   |   |   |   |   |   |   |   |   |   |   |   |   |   |   |   |   |   |   |   |   |   |   |   |   |   |   |   |   |   |   |   |   |   |   |   |   |   |   |   |   |   |   |   |   |   |   |   |   |   |   |   |   |   |   |   |   |   |   |   |   |   |   |   |   |   |   |   |   |   |   |   |   |   |   |   |   |   |   |   |   |   |   |   |   |   |   |   |   |   |   |   |   |   |   |   |   |   |   |   |   |   |   |   |   |   |   |   |   |   |   |   |   |   |   |   |   |   |   |   |   |   |   |   |   |   |   |   |   |   |   |   |   |   |   |   |   |   |   |   |   |   |   |   |   |   |   |   |   |   |   |   |   |   |   |   |   |   |   |   |   |   |   |   |   |   |   |   |   |   |   |   |   |   |   |   |   |   |   |   |   |   |   |   |   |   |   |   |   |   |   |   |   |   |   |   |   |   |   |   |   |   |   |   |   |   |   |   |   |   |   |   |   |   |   |   |   |   |   |   |   |   |   |   |   |   |   |   |   |   |   |   |   |   |   |   |   |   |   |   |   |   |   |   |   |   |   |   |   |   |   |   |   |   |   |   |   |   |   |   |   |   |   |   |   |   |   |   |   |   |   |   |   |   |   |   |   |   |   |   |   |   |   |   |   |   |   |   |   |   |   |   |   |   |   |   |   |   |   |   |   |   |   |   |   |   |   |   |   |   |   |   |   |   |   |   |   |   |   |   |   |   |   |   |   |   |   |   |   |   |   |   |   |   |   |   |   |   |   |   |   |   |   |   |   |   |   |   |   |   |   |   |   |   |   |   |   |   |   |   |   |   |   |   |   |   |   |   |   |   |   |   |   |   |   |   |   |   |   |   |   |   |   |   |   |   |   |   |   |   |   |   |   |   |   |   |   |   |   |   |   |   |   |   |   |   |   |   |   |   |   |   |   |   |   |   |   |   |   |   |   |   |   |   |   |   |   |   |   |   |   |   |   |   |   |   |   |   |   |   |   |   |   |   |   |   |   |   |   |   |   |   |   |   |   |   |   |   |   |   |   |   |   |   |   |   |   |   |   |   |   |   |   |   |   |   |   |   |   |   |   |   |   |   |   |   |   |   |   |   |   |   |   |   |   |   |   |   |   |   |   |   |   |   |   |   |   |   |   |   |   |   |   |   |   |   |   |   |   |   |   |   |   |   |   |   |   |   |   |   |   |   |   |   |   |   |   |   |   |   |   |   |   |   |   |   |   |   |   |   |   |   |   |   |   |   |   |   |   |   |   |   |   |   |   |   |   |   |   |   |   |   |   |   |   |   |   |   |   |   |   |   |   |   |   |   |   |   |   |   |   |   |   |   |   |   |   |   |   |   |   |   |   |   |   |   |   |   |   |   |   |   |   |   |   |   |   |   |   |   |   |   |   |   |   |   |   |   |   |   |   |   |   |   |   |   |   |   |   |   |   |   |   |   |   |   |   |   |   |   |   |   |   |   |   |   |   |   |   |   |   |   |   |   |   |   |   |   |   |   |   |   |   |   |   |   |   |   |   |   |   |   |   |   |   |   |   |   |   |   |   |   |   |   |   |   |   |   |   |   |   |   |   |   |   |   |   |   |   |   |   |   |   |   |   |   |   |   |   |   |   |   |   |   |   |   |   |   |   |   |   |   |   |   |   |   |   |   |   |   |   |   |   |   |   |   |   |   |   |   |   |   |   |   |   |   |   |   |   |   |   |   |   |   |   |   |   |   |   |   |   |   |   |   |   |   |   |   |   |   |   |   |   |   |   |   |   |   |   |   |   |   |   |   |   |   |   |   |   |   |   |   |   |   |   |   |   |   |   |   |   |   |   |   |   |   |   |   |   |   |   |   |   |   |   |   |   |   |   |   |   |   |   |   |   |   |   |   |   |   |   |   |   |   |   |   |   |   |   |   |   |   |   |   |   |   |   |   |   |   |   |   |   |   |   |   |   |   |   |   |   |   |   |   |   |   |   |   |   |   |   |   |   |   |   |   |   |   |   |   |   |   |   |   |   |   |   |   |   |   |   |   |   |   |   |   |   |   |   |   |   |   |   |   |   |   |   |   |   |   |   |   |   |   |   |   |   |   |   |   |   |   |   |   |   |   |   |   |   |   |   |   |   |   |   |   |   |   |   |   |   |   |   |   |   |   |   |   |   |   |   |   |   |   |   |   |   |   |   |   |   |   |   |   |   |   |   |   |   |   |   |   |   |   |   |   |   |   |   |   |   |   |   |   |   |   |   |   |   |   |   |   |   |   |   |   |   |   |   |   |   |   |   |   |   |   |   |   |   |   |   |   |   |   |   |   |   |   |   |   |   |   |   |   |   |   |   |   |   |   |   |   |   |
|----------------------------------------|--------|------------|------|------|------|------|------|------|------|------|------|----|---|---|---|---|---|---|---|---|---|---|---|---|---|---|---|---|---|---|---|---|---|---|---|---|---|---|---|---|---|---|---|---|---|---|---|---|---|---|---|---|----|---|---|---|---|---|---|---|---|---|---|---|---|---|---|---|---|---|---|---|---|---|---|---|---|---|---|---|---|---|---|---|---|---|---|---|---|---|---|---|---|---|---|---|---|---|---|---|---|---|---|---|---|---|---|---|---|---|---|---|---|---|---|---|---|---|---|---|---|---|---|---|---|---|---|---|---|---|---|---|---|---|---|---|---|---|---|---|---|---|---|---|---|---|---|---|---|---|---|---|---|---|---|---|---|---|---|---|---|---|---|---|---|---|---|---|---|---|---|---|---|---|---|---|---|---|---|---|---|---|---|---|---|---|---|---|---|---|---|---|---|---|---|---|---|---|---|---|---|---|---|---|---|---|---|---|---|---|---|---|---|---|---|---|---|---|---|---|---|---|---|---|---|---|---|---|---|---|---|---|---|---|---|---|---|---|---|---|---|---|---|---|---|---|---|---|---|---|---|---|---|---|---|---|---|---|---|---|---|---|---|---|---|---|---|---|---|---|---|---|---|---|---|---|---|---|---|---|---|---|---|---|---|---|---|---|---|---|---|---|---|---|---|---|---|---|---|---|---|---|---|---|---|---|---|---|---|---|---|---|---|---|---|---|---|---|---|---|---|---|---|---|---|---|---|---|---|---|---|---|---|---|---|---|---|---|---|---|---|---|---|---|---|---|---|---|---|---|---|---|---|---|---|---|---|---|---|---|---|---|---|---|---|---|---|---|---|---|---|---|---|---|---|---|---|---|---|---|---|---|---|---|---|---|---|---|---|---|---|---|---|---|---|---|---|---|---|---|---|---|---|---|---|---|---|---|---|---|---|---|---|---|---|---|---|---|---|---|---|---|---|---|---|---|---|---|---|---|---|---|---|---|---|---|---|---|---|---|---|---|---|---|---|---|---|---|---|---|---|---|---|---|---|---|---|---|---|---|---|---|---|---|---|---|---|---|---|---|---|---|---|---|---|---|---|---|---|---|---|---|---|---|---|---|---|---|---|---|---|---|---|---|---|---|---|---|---|---|---|---|---|---|---|---|---|---|---|---|---|---|---|---|---|---|---|---|---|---|---|---|---|---|---|---|---|---|---|---|---|---|---|---|---|---|---|---|---|---|---|---|---|---|---|---|---|---|---|---|---|---|---|---|---|---|---|---|---|---|---|---|---|---|---|---|---|---|---|---|---|---|---|---|---|---|---|---|---|---|---|---|---|---|---|---|---|---|---|---|---|---|---|---|---|---|---|---|---|---|---|---|---|---|---|---|---|---|---|---|---|---|---|---|---|---|---|---|---|---|---|---|---|---|---|---|---|---|---|---|---|---|---|---|---|---|---|---|---|---|---|---|---|---|---|---|---|---|---|---|---|---|---|---|---|---|---|---|---|---|---|---|---|---|---|---|---|---|---|---|---|---|---|---|---|---|---|---|---|---|---|---|---|---|---|---|---|---|---|---|---|---|---|---|---|---|---|---|---|---|---|---|---|---|---|---|---|---|---|---|---|---|---|---|---|---|---|---|---|---|---|---|---|---|---|---|---|---|---|---|---|---|---|---|---|---|---|---|---|---|---|---|---|---|---|---|---|---|---|---|---|---|---|---|---|---|---|---|---|---|---|---|---|---|---|---|---|---|---|---|---|---|---|---|---|---|---|---|---|---|---|---|---|---|---|---|---|---|---|---|---|---|---|---|---|---|---|---|---|---|---|---|---|---|---|---|---|---|---|---|---|---|---|---|---|---|---|---|---|---|---|---|---|---|---|---|---|---|---|---|---|---|---|---|---|---|---|---|---|---|---|---|---|---|---|---|---|---|---|---|---|---|---|---|---|---|---|---|---|---|---|---|---|---|---|---|---|---|---|---|---|---|---|---|---|---|---|---|---|---|---|---|---|---|---|---|---|---|---|---|---|---|---|---|---|---|---|---|---|---|---|---|---|---|---|---|---|---|---|---|---|---|---|---|---|---|---|---|---|---|---|---|---|---|---|---|---|---|---|---|---|---|---|---|---|---|---|---|---|---|---|---|---|---|---|---|---|---|---|---|---|---|---|---|---|---|---|---|---|---|---|---|---|---|---|---|---|---|---|---|---|---|---|---|---|---|---|---|---|---|---|---|---|---|---|---|---|---|---|---|---|---|---|---|---|---|---|---|---|---|---|---|---|---|---|---|---|---|---|---|---|---|---|---|---|---|---|---|---|---|---|---|---|---|---|---|---|---|---|---|---|---|---|---|---|---|---|---|---|---|---|---|---|---|---|---|---|---|---|---|---|---|---|---|---|---|---|---|---|---|---|---|---|---|---|---|---|---|---|---|---|---|---|---|---|---|---|---|---|---|---|---|---|---|---|---|---|---|---|---|---|---|---|---|---|---|---|---|---|---|---|---|---|---|---|---|---|---|---|---|---|---|---|---|---|---|---|---|---|---|---|---|---|---|---|---|---|---|---|---|---|---|---|---|---|---|---|---|---|---|---|---|---|---|---|---|---|---|---|---|---|---|
|                                        |        | Section 99 |      |      |      |      |      |      |      |      |      |    |   |   |   |   |   |   |   |   |   |   |   |   |   |   |   |   |   |   |   |   |   |   |   |   |   |   |   |   |   |   |   |   |   |   |   |   |   |   |   |   |    |   |   |   |   |   |   |   |   |   |   |   |   |   |   |   |   |   |   |   |   |   |   |   |   |   |   |   |   |   |   |   |   |   |   |   |   |   |   |   |   |   |   |   |   |   |   |   |   |   |   |   |   |   |   |   |   |   |   |   |   |   |   |   |   |   |   |   |   |   |   |   |   |   |   |   |   |   |   |   |   |   |   |   |   |   |   |   |   |   |   |   |   |   |   |   |   |   |   |   |   |   |   |   |   |   |   |   |   |   |   |   |   |   |   |   |   |   |   |   |   |   |   |   |   |   |   |   |   |   |   |   |   |   |   |   |   |   |   |   |   |   |   |   |   |   |   |   |   |   |   |   |   |   |   |   |   |   |   |   |   |   |   |   |   |   |   |   |   |   |   |   |   |   |   |   |   |   |   |   |   |   |   |   |   |   |   |   |   |   |   |   |   |   |   |   |   |   |   |   |   |   |   |   |   |   |   |   |   |   |   |   |   |   |   |   |   |   |   |   |   |   |   |   |   |   |   |   |   |   |   |   |   |   |   |   |   |   |   |   |   |   |   |   |   |   |   |   |   |   |   |   |   |   |   |   |   |   |   |   |   |   |   |   |   |   |   |   |   |   |   |   |   |   |   |   |   |   |   |   |   |   |   |   |   |   |   |   |   |   |   |   |   |   |   |   |   |   |   |   |   |   |   |   |   |   |   |   |   |   |   |   |   |   |   |   |   |   |   |   |   |   |   |   |   |   |   |   |   |   |   |   |   |   |   |   |   |   |   |   |   |   |   |   |   |   |   |   |   |   |   |   |   |   |   |   |   |   |   |   |   |   |   |   |   |   |   |   |   |   |   |   |   |   |   |   |   |   |   |   |   |   |   |   |   |   |   |   |   |   |   |   |   |   |   |   |   |   |   |   |   |   |   |   |   |   |   |   |   |   |   |   |   |   |   |   |   |   |   |   |   |   |   |   |   |   |   |   |   |   |   |   |   |   |   |   |   |   |   |   |   |   |   |   |   |   |   |   |   |   |   |   |   |   |   |   |   |   |   |   |   |   |   |   |   |   |   |   |   |   |   |   |   |   |   |   |   |   |   |   |   |   |   |   |   |   |   |   |   |   |   |   |   |   |   |   |   |   |   |   |   |   |   |   |   |   |   |   |   |   |   |   |   |   |   |   |   |   |   |   |   |   |   |   |   |   |   |   |   |   |   |   |   |   |   |   |   |   |   |   |   |   |   |   |   |   |   |   |   |   |   |   |   |   |   |   |   |   |   |   |   |   |   |   |   |   |   |   |   |   |   |   |   |   |   |   |   |   |   |   |   |   |   |   |   |   |   |   |   |   |   |   |   |   |   |   |   |   |   |   |   |   |   |   |   |   |   |   |   |   |   |   |   |   |   |   |   |   |   |   |   |   |   |   |   |   |   |   |   |   |   |   |   |   |   |   |   |   |   |   |   |   |   |   |   |   |   |   |   |   |   |   |   |   |   |   |   |   |   |   |   |   |   |   |   |   |   |   |   |   |   |   |   |   |   |   |   |   |   |   |   |   |   |   |   |   |   |   |   |   |   |   |   |   |   |   |   |   |   |   |   |   |   |   |   |   |   |   |   |   |   |   |   |   |   |   |   |   |   |   |   |   |   |   |   |   |   |   |   |   |   |   |   |   |   |   |   |   |   |   |   |   |   |   |   |   |   |   |   |   |   |   |   |   |   |   |   |   |   |   |   |   |   |   |   |   |   |   |   |   |   |   |   |   |   |   |   |   |   |   |   |   |   |   |   |   |   |   |   |   |   |   |   |   |   |   |   |   |   |   |   |   |   |   |   |   |   |   |   |   |   |   |   |   |   |   |   |   |   |   |   |   |   |   |   |   |   |   |   |   |   |   |   |   |   |   |   |   |   |   |   |   |   |   |   |   |   |   |   |   |   |   |   |   |   |   |   |   |   |   |   |   |   |   |   |   |   |   |   |   |   |   |   |   |   |   |   |   |   |   |   |   |   |   |   |   |   |   |   |   |   |   |   |   |   |   |   |   |   |   |   |   |   |   |   |   |   |   |   |   |   |   |   |   |   |   |   |   |   |   |   |   |   |   |   |   |   |   |   |   |   |   |   |   |   |   |   |   |   |   |   |   |   |   |   |   |   |   |   |   |   |   |   |   |   |   |   |   |   |   |   |   |   |   |   |   |   |   |   |   |   |   |   |   |   |   |   |   |   |   |   |   |   |   |   |   |   |   |   |   |   |   |   |   |   |   |   |   |   |   |   |   |   |   |   |   |   |   |   |   |   |   |   |   |   |   |   |   |   |   |   |   |   |   |   |   |   |   |   |   |   |   |   |   |   |   |   |   |   |   |   |   |   |   |   |   |   |   |   |   |   |   |   |   |   |   |   |   |   |   |   |   |   |   |   |   |   |   |   |   |   |   |   |   |   |   |   |   |   |   |   |   |   |   |   |   |   |   |   |   |   |   |   |   |   |   |   |   |   |   |
|                                        |        | (8331)     | 8331 | 8340 | 8350 | 8360 | 8370 | 8380 | 8390 | 8400 | 8415 |    |   |   |   |   |   |   |   |   |   |   |   |   |   |   |   |   |   |   |   |   |   |   |   |   |   |   |   |   |   |   |   |   |   |   |   |   |   |   |   |   |    |   |   |   |   |   |   |   |   |   |   |   |   |   |   |   |   |   |   |   |   |   |   |   |   |   |   |   |   |   |   |   |   |   |   |   |   |   |   |   |   |   |   |   |   |   |   |   |   |   |   |   |   |   |   |   |   |   |   |   |   |   |   |   |   |   |   |   |   |   |   |   |   |   |   |   |   |   |   |   |   |   |   |   |   |   |   |   |   |   |   |   |   |   |   |   |   |   |   |   |   |   |   |   |   |   |   |   |   |   |   |   |   |   |   |   |   |   |   |   |   |   |   |   |   |   |   |   |   |   |   |   |   |   |   |   |   |   |   |   |   |   |   |   |   |   |   |   |   |   |   |   |   |   |   |   |   |   |   |   |   |   |   |   |   |   |   |   |   |   |   |   |   |   |   |   |   |   |   |   |   |   |   |   |   |   |   |   |   |   |   |   |   |   |   |   |   |   |   |   |   |   |   |   |   |   |   |   |   |   |   |   |   |   |   |   |   |   |   |   |   |   |   |   |   |   |   |   |   |   |   |   |   |   |   |   |   |   |   |   |   |   |   |   |   |   |   |   |   |   |   |   |   |   |   |   |   |   |   |   |   |   |   |   |   |   |   |   |   |   |   |   |   |   |   |   |   |   |   |   |   |   |   |   |   |   |   |   |   |   |   |   |   |   |   |   |   |   |   |   |   |   |   |   |   |   |   |   |   |   |   |   |   |   |   |   |   |   |   |   |   |   |   |   |   |   |   |   |   |   |   |   |   |   |   |   |   |   |   |   |   |   |   |   |   |   |   |   |   |   |   |   |   |   |   |   |   |   |   |   |   |   |   |   |   |   |   |   |   |   |   |   |   |   |   |   |   |   |   |   |   |   |   |   |   |   |   |   |   |   |   |   |   |   |   |   |   |   |   |   |   |   |   |   |   |   |   |   |   |   |   |   |   |   |   |   |   |   |   |   |   |   |   |   |   |   |   |   |   |   |   |   |   |   |   |   |   |   |   |   |   |   |   |   |   |   |   |   |   |   |   |   |   |   |   |   |   |   |   |   |   |   |   |   |   |   |   |   |   |   |   |   |   |   |   |   |   |   |   |   |   |   |   |   |   |   |   |   |   |   |   |   |   |   |   |   |   |   |   |   |   |   |   |   |   |   |   |   |   |   |   |   |   |   |   |   |   |   |   |   |   |   |   |   |   |   |   |   |   |   |   |   |   |   |   |   |   |   |   |   |   |   |   |   |   |   |   |   |   |   |   |   |   |   |   |   |   |   |   |   |   |   |   |   |   |   |   |   |   |   |   |   |   |   |   |   |   |   |   |   |   |   |   |   |   |   |   |   |   |   |   |   |   |   |   |   |   |   |   |   |   |   |   |   |   |   |   |   |   |   |   |   |   |   |   |   |   |   |   |   |   |   |   |   |   |   |   |   |   |   |   |   |   |   |   |   |   |   |   |   |   |   |   |   |   |   |   |   |   |   |   |   |   |   |   |   |   |   |   |   |   |   |   |   |   |   |   |   |   |   |   |   |   |   |   |   |   |   |   |   |   |   |   |   |   |   |   |   |   |   |   |   |   |   |   |   |   |   |   |   |   |   |   |   |   |   |   |   |   |   |   |   |   |   |   |   |   |   |   |   |   |   |   |   |   |   |   |   |   |   |   |   |   |   |   |   |   |   |   |   |   |   |   |   |   |   |   |   |   |   |   |   |   |   |   |   |   |   |   |   |   |   |   |   |   |   |   |   |   |   |   |   |   |   |   |   |   |   |   |   |   |   |   |   |   |   |   |   |   |   |   |   |   |   |   |   |   |   |   |   |   |   |   |   |   |   |   |   |   |   |   |   |   |   |   |   |   |   |   |   |   |   |   |   |   |   |   |   |   |   |   |   |   |   |   |   |   |   |   |   |   |   |   |   |   |   |   |   |   |   |   |   |   |   |   |   |   |   |   |   |   |   |   |   |   |   |   |   |   |   |   |   |   |   |   |   |   |   |   |   |   |   |   |   |   |   |   |   |   |   |   |   |   |   |   |   |   |   |   |   |   |   |   |   |   |   |   |   |   |   |   |   |   |   |   |   |   |   |   |   |   |   |   |   |   |   |   |   |   |   |   |   |   |   |   |   |   |   |   |   |   |   |   |   |   |   |   |   |   |   |   |   |   |   |   |   |   |   |   |   |   |   |   |   |   |   |   |   |   |   |   |   |   |   |   |   |   |   |   |   |   |   |   |   |   |   |   |   |   |   |   |   |   |   |   |   |   |   |   |   |   |   |   |   |   |   |   |   |   |   |   |   |   |   |   |   |   |   |   |   |   |   |   |   |   |   |   |   |   |   |   |   |   |   |   |   |   |   |   |   |   |   |   |   |   |   |   |   |   |   |   |   |   |   |   |   |   |   |   |   |   |   |   |   |   |   |   |   |   |   |   |   |   |   |   |   |   |   |   |   |   |   |   |   |   |   |   |   |   |   |   |   |   |   |   |   |   |   |   |   |
| SARS-CoV-2 Region 11168 - 29055 nt     | (8147) | AT         | TC   | AC   | AC   | ACC  | AG   | CT   | TT   | T    | G    | A  | T | A | A | A | A | G | T | G | C | T | T | T | G | A | T | A | T | T | A | A | A | A | C | A | T | T | T | T | C | T | A | T | T | A | C | T | G | A | C | - | AG | T | C | C | A | T | G | T | G | A |   |   |   |   |   |   |   |   |   |   |   |   |   |   |   |   |   |   |   |   |   |   |   |   |   |   |   |   |   |   |   |   |   |   |   |   |   |   |   |   |   |   |   |   |   |   |   |   |   |   |   |   |   |   |   |   |   |   |   |   |   |   |   |   |   |   |   |   |   |   |   |   |   |   |   |   |   |   |   |   |   |   |   |   |   |   |   |   |   |   |   |   |   |   |   |   |   |   |   |   |   |   |   |   |   |   |   |   |   |   |   |   |   |   |   |   |   |   |   |   |   |   |   |   |   |   |   |   |   |   |   |   |   |   |   |   |   |   |   |   |   |   |   |   |   |   |   |   |   |   |   |   |   |   |   |   |   |   |   |   |   |   |   |   |   |   |   |   |   |   |   |   |   |   |   |   |   |   |   |   |   |   |   |   |   |   |   |   |   |   |   |   |   |   |   |   |   |   |   |   |   |   |   |   |   |   |   |   |   |   |   |   |   |   |   |   |   |   |   |   |   |   |   |   |   |   |   |   |   |   |   |   |   |   |   |   |   |   |   |   |   |   |   |   |   |   |   |   |   |   |   |   |   |   |   |   |   |   |   |   |   |   |   |   |   |   |   |   |   |   |   |   |   |   |   |   |   |   |   |   |   |   |   |   |   |   |   |   |   |   |   |   |   |   |   |   |   |   |   |   |   |   |   |   |   |   |   |   |   |   |   |   |   |   |   |   |   |   |   |   |   |   |   |   |   |   |   |   |   |   |   |   |   |   |   |   |   |   |   |   |   |   |   |   |   |   |   |   |   |   |   |   |   |   |   |   |   |   |   |   |   |   |   |   |   |   |   |   |   |   |   |   |   |   |   |   |   |   |   |   |   |   |   |   |   |   |   |   |   |   |   |   |   |   |   |   |   |   |   |   |   |   |   |   |   |   |   |   |   |   |   |   |   |   |   |   |   |   |   |   |   |   |   |   |   |   |   |   |   |   |   |   |   |   |   |   |   |   |   |   |   |   |   |   |   |   |   |   |   |   |   |   |   |   |   |   |   |   |   |   |   |   |   |   |   |   |   |   |   |   |   |   |   |   |   |   |   |   |   |   |   |   |   |   |   |   |   |   |   |   |   |   |   |   |   |   |   |   |   |   |   |   |   |   |   |   |   |   |   |   |   |   |   |   |   |   |   |   |   |   |   |   |   |   |   |   |   |   |   |   |   |   |   |   |   |   |   |   |   |   |   |   |   |   |   |   |   |   |   |   |   |   |   |   |   |   |   |   |   |   |   |   |   |   |   |   |   |   |   |   |   |   |   |   |   |   |   |   |   |   |   |   |   |   |   |   |   |   |   |   |   |   |   |   |   |   |   |   |   |   |   |   |   |   |   |   |   |   |   |   |   |   |   |   |   |   |   |   |   |   |   |   |   |   |   |   |   |   |   |   |   |   |   |   |   |   |   |   |   |   |   |   |   |   |   |   |   |   |   |   |   |   |   |   |   |   |   |   |   |   |   |   |   |   |   |   |   |   |   |   |   |   |   |   |   |   |   |   |   |   |   |   |   |   |   |   |   |   |   |   |   |   |   |   |   |   |   |   |   |   |   |   |   |   |   |   |   |   |   |   |   |   |   |   |   |   |   |   |   |   |   |   |   |   |   |   |   |   |   |   |   |   |   |   |   |   |   |   |   |   |   |   |   |   |   |   |   |   |   |   |   |   |   |   |   |   |   |   |   |   |   |   |   |   |   |   |   |   |   |   |   |   |   |   |   |   |   |   |   |   |   |   |   |   |   |   |   |   |   |   |   |   |   |   |   |   |   |   |   |   |   |   |   |   |   |   |   |   |   |   |   |   |   |   |   |   |   |   |   |   |   |   |   |   |   |   |   |   |   |   |   |   |   |   |   |   |   |   |   |   |   |   |   |   |   |   |   |   |   |   |   |   |   |   |   |   |   |   |   |   |   |   |   |   |   |   |   |   |   |   |   |   |   |   |   |   |   |   |   |   |   |   |   |   |   |   |   |   |   |   |   |   |   |   |   |   |   |   |   |   |   |   |   |   |   |   |   |   |   |   |   |   |   |   |   |   |   |   |   |   |   |   |   |   |   |   |   |   |   |   |   |   |   |   |   |   |   |   |   |   |   |   |   |   |   |   |   |   |   |   |   |   |   |   |   |   |   |   |   |   |   |   |   |   |   |   |   |   |   |   |   |   |   |   |   |   |   |   |   |   |   |   |   |   |   |   |   |   |   |   |   |   |   |   |   |   |   |   |   |   |   |   |   |   |   |   |   |   |   |   |   |   |   |   |   |   |   |   |   |   |   |   |   |   |   |   |   |   |   |   |   |   |   |   |   |   |   |   |   |   |   |   |   |   |   |   |   |   |   |   |   |   |   |   |   |   |   |   |   |   |   |   |   |   |   |   |   |   |   |   |   |   |   |   |   |   |   |   |   |   |   |   |   |   |   |   |   |   |   |   |
| Homo sapiens mitochondrion NC_012920.1 | (7630) | TA         | TC   | -    | A    | T    | A    | G    | A    | AG   | AG   | CT | T | A | T | C | A | C | - | - | - | - | - | - | - | - | - | - | - | - | - | - | - | - | - | - | - | - | - | - | - | - | - | - | - | - | - | - | - | - | - | - | -  | - | - | - | - | - | - | - | - | - | - | - | - | - | - | - | - | - | - | - | - | - | - | - | - | - | - | - | - | - | - | - | - | - | - | - | - | - | - | - | - | - | - | - | - | - | - | - | - | - | - | - | - | - | - | - | - | - | - | - | - | - | - | - | - | - | - | - | - | - | - | - | - | - | - | - | - | - | - | - | - | - | - | - | - | - | - | - | - | - | - | - | - | - | - | - | - | - | - | - | - | - | - | - | - | - | - | - | - | - | - | - | - | - | - | - | - | - | - | - | - | - | - | - | - | - | - | - | - | - | - | - | - | - | - | - | - | - | - | - | - | - | - | - | - | - | - | - | - | - | - | - | - | - | - | - | - | - | - | - | - | - | - | - | - | - | - | - | - | - | - | - | - | - | - | - | - | - | - | - | - | - | - | - | - | - | - | - | - | - | - | - | - | - | - | - | - | - | - | - | - | - | - | - | - | - | - | - | - | - | - | - | - | - | - | - | - | - | - | - | - | - | - | - | - | - | - | - | - | - | - | - | - | - | - | - | - | - | - | - | - | - | - | - | - | - | - | - | - | - | - | - | - | - | - | - | - | - | - | - | - | - | - | - | - | - | - | - | - | - | - | - | - | - | - | - | - | - | - | - | - | - | - | - | - | - | - | - | - | - | - | - | - | - | - | - | - | - | - | - | - | - | - | - | - | - | - | - | - | - | - | - | - | - | - | - | - | - | - | - | - | - | - | - | - | - | - | - | - | - | - | - | - | - | - | - | - | - | - | - | - | - | - | - | - | - | - | - | - | - | - | - | - | - | - | - | - | - | - | - | - | - | - | - | - | - | - | - | - | - | - | - | - | - | - | - | - | - | - | - | - | - | - | - | - | - | - | - | - | - | - | - | - | - | - | - | - | - | - | - | - | - | - | - | - | - | - | - | - | - | - | - | - | - | - | - | - | - | - | - | - | - | - | - | - | - | - | - | - | - | - | - | - | - | - | - | - | - | - | - | - | - | - | - | - | - | - | - | - | - | - | - | - | - | - | - | - | - | - | - | - | - | - | - | - | - | - | - | - | - | - | - | - | - | - | - | - | - | - | - | - | - | - | - | - | - | - | - | - | - | - | - | - | - | - | - | - | - | - | - | - | - | - | - | - | - | - | - | - | - | - | - | - | - | - | - | - | - | - | - | - | - | - | - | - | - | - | - | - | - | - | - | - | - | - | - | - | - | - | - | - | - | - | - | - | - | - | - | - | - | - | - | - | - | - | - | - | - | - | - | - | - | - | - | - | - | - | - | - | - | - | - | - | - | - | - | - | - | - | - | - | - | - | - | - | - | - | - | - | - | - | - | - | - | - | - | - | - | - | - | - | - | - | - | - | - | - | - | - | - | - | - | - | - | - | - | - | - | - | - | - | - | - | - | - | - | - | - | - | - | - | - | - | - | - | - | - | - | - | - | - | - | - | - | - | - | - | - | - | - | - | - | - | - | - | - | - | - | - | - | - | - | - | - | - | - | - | - | - | - | - | - | - | - | - | - | - | - | - | - | - | - | - | - | - | - | - | - | - | - | - | - | - | - | - | - | - | - | - | - | - | - | - | - | - | - | - | - | - | - | - | - | - | - | - | - | - | - | - | - | - | - | - | - | - | - | - | - | - | - | - | - | - | - | - | - | - | - | - | - | - | - | - | - | - | - | - | - | - | - | - | - | - | - | - | - | - | - | - | - | - | - | - | - | - | - | - | - | - | - | - | - | - | - | - | - | - | - | - | - | - | - | - | - | - | - | - | - | - | - | - | - | - | - | - | - | - | - | - | - | - | - | - | - | - | - | - | - | - | - | - | - | - | - | - | - | - | - | - | - | - | - | - | - | - | - | - | - | - | - | - | - | - | - | - | - | - | - | - | - | - | - | - | - | - | - | - | - | - | - | - | - | - | - | - | - | - | - | - | - | - | - | - | - | - | - | - | - | - | - | - | - | - | - | - | - | - | - | - | - | - | - | - | - | - | - | - | - | - | - | - | - | - | - | - | - | - | - | - | - | - | - | - | - | - | - | - | - | - | - | - | - | - | - | - | - | - | - | - | - | - | - | - | - | - | - | - | - | - | - | - | - | - | - | - | - | - | - | - | - | - | - | - | - | - | - | - | - | - | - | - | - | - | - | - | - | - | - | - | - | - | - | - | - | - | - | - | - | - | - | - | - | - | - | - | - | - | - | - | - | - | - | - | - | - | - | - | - | - | - | - | - | - | - | - | - | - | - | - | - | - | - | - | - | - | - | - | - | - | - | - | - | - | - | - | - | - | - | - | - | - | - | - | - | - | - | - | - | - | - | - | - | - | - | - | - | - | - | - | - | - | - | - | - | - | - | - | - | - | - | - | - | - | - | - | - | - | - | - | - | - | - | - | - | - | - | - | - | - | - | - | - | - | - | - | - | - | - | - | - | - | - | - | - | - | - | - | - | - | - | - | - | - | - | - | - | - | - | - | - |

SARS-CoV-2 + human DNA.apr

|                                        |        |             |      |     |      |     |      |      |      |     |      |      |      |     |      |     |      |      |    |
|----------------------------------------|--------|-------------|------|-----|------|-----|------|------|------|-----|------|------|------|-----|------|-----|------|------|----|
|                                        |        | Section 106 |      |     |      |     |      |      |      |     |      |      |      |     |      |     |      |      |    |
|                                        |        | (8926)      | 8926 |     | 8940 |     | 8950 |      | 8960 |     | 8970 |      | 8980 |     | 8990 |     | 9000 | 9010 |    |
| SARS-CoV-2 Region 11168 - 29055 nt     | (8730) | C           | CAG  | CAT | A    | TAT | CT   | ACT  | TAT  | TG  | G    | TGT  | TT   | GT  | CTA  | T   | G    | ACT  | T  |
| Homo sapiens mitochondrion NC_012920.1 | (8189) | G           | CA   | AAC | CA   | AGT | T    | T    | CA   | --- | TG   | CCCA | T    | CT  | CTA  | -   | GA   | ATT  | TA |
|                                        |        |             |      |     |      |     |      |      |      |     |      |      |      |     |      |     |      |      |    |
|                                        |        | (9011)      | 9011 |     | 9020 |     | 9030 |      | 9040 |     | 9050 |      | 9060 |     | 9070 |     | 9080 | 9095 |    |
| SARS-CoV-2 Region 11168 - 29055 nt     | (8810) | -           | CAC  | TGT | CT   | T   | TTTT | GAT  | GG   | TAG | AG   | TT   | GA   | T   | AT   | GT  | CA   | AG   | T  |
| Homo sapiens mitochondrion NC_012920.1 | (8269) | G           | CAC  | CCC | CT   | T   | TAC  | CCCC | CT   | TAG | AG   | CCC  | A    | CT  | GT   | TA  | AG   | ---  | CT |
|                                        |        |             |      |     |      |     |      |      |      |     |      |      |      |     |      |     |      |      |    |
|                                        |        | (9096)      | 9096 |     | 9110 |     | 9120 |      | 9130 |     | 9140 |      | 9150 |     | 9160 |     | 9170 | 9180 |    |
| SARS-CoV-2 Region 11168 - 29055 nt     | (8894) | T           | GT   | TAA | AGG  | TTT | TACA | ACC  | A    | T   | CG   | TAG  | GT   | CCC | AA   | CA  | AG   | C    | T  |
| Homo sapiens mitochondrion NC_012920.1 | (8350) | A           | CC   | T   | C    | --- | TTT  | TACA | GT   | G   | AAA  | TG   | ---  | CCC | A    | AA  | CT   | AA   | T  |
|                                        |        |             |      |     |      |     |      |      |      |     |      |      |      |     |      |     |      |      |    |
|                                        |        | (9181)      | 9181 |     | 9190 |     | 9200 |      | 9210 |     | 9220 |      | 9230 |     | 9240 |     | 9250 | 9265 |    |
| SARS-CoV-2 Region 11168 - 29055 nt     | (8978) | G           | TTC  | AAT | TAT  | A   | AGAA | AGT  | T    | G   | ATGG | T    | GT   | GTC | CA   | AC  | AA   | T    | T  |
| Homo sapiens mitochondrion NC_012920.1 | (8425) | A           | TTC  | C   | ---  | T   | CAT  | A    | CCCC | A   | AC   | T    | AAAA | T   | AT   | TT  | AAA  | CA   | CA |
|                                        |        |             |      |     |      |     |      |      |      |     |      |      |      |     |      |     |      |      |    |
|                                        |        | (9266)      | 9266 |     | 9280 |     | 9290 |      | 9300 |     | 9310 |      | 9320 |     | 9330 |     | 9340 | 9350 |    |
| SARS-CoV-2 Region 11168 - 29055 nt     | (9063) | A           | AA   | CC  | C    | AGG | AGT  | CA   | AA   | T   | GG   | AAA  | T    | TGA | TTT  | CTT | A    | GA   | T  |
| Homo sapiens mitochondrion NC_012920.1 | (8505) | A           | TA   | AC  | CA   | A   | ACCC | T    | GA   | A   | ACC  | AAA  | A    | TGA | AC   | G   | ---  | AA   | AT |
|                                        |        |             |      |     |      |     |      |      |      |     |      |      |      |     |      |     |      |      |    |
|                                        |        | (9351)      | 9351 |     | 9360 |     | 9370 |      | 9380 |     | 9390 |      | 9400 |     | 9410 |     | 9420 | 9435 |    |
| SARS-CoV-2 Region 11168 - 29055 nt     | (9148) | T           | C    | GA  | AC   | AT  | ATC  | GTT  | -    | TAT | GG   | AG   | ATT  | T   | -    | TAG | T    | CAT  | T  |
| Homo sapiens mitochondrion NC_012920.1 | (8585) | C           | AG   | T   | AC   | TG  | ATC  | ATT  | C    | TAT | TT   | CCCC | T    | C   | TAT  | T   | GAT  | CCC  | CA |
|                                        |        |             |      |     |      |     |      |      |      |     |      |      |      |     |      |     |      |      |    |
|                                        |        | (9436)      | 9436 |     | 9450 |     | 9460 |      | 9470 |     | 9480 |      | 9490 |     | 9500 |     | 9510 | 9520 |    |
| SARS-CoV-2 Region 11168 - 29055 nt     | (9230) | G           | GA   | AT  | CA   | C   | TTTT | GA   | ---  | TT  | AG   | AA   | G    | ATT | TT   | TAT | TC   | CT   | AT |
| Homo sapiens mitochondrion NC_012920.1 | (8668) | T           | G    | AC  | TA   | AT  | CA   | AACT | AA   | CC  | T    | CA   | AAA  | CA  | AA   | T   | GAT  | AA   | CA |
|                                        |        |             |      |     |      |     |      |      |      |     |      |      |      |     |      |     |      |      |    |
|                                        |        | (9436)      | 9436 |     | 9450 |     | 9460 |      | 9470 |     | 9480 |      | 9490 |     | 9500 |     | 9510 | 9520 |    |
| SARS-CoV-2 Region 11168 - 29055 nt     | (9230) | G           | GA   | AT  | CA   | C   | TTTT | GA   | ---  | TT  | AG   | AA   | G    | ATT | TT   | TAT | TC   | CT   | AT |
| Homo sapiens mitochondrion NC_012920.1 | (8668) | T           | G    | AC  | TA   | AT  | CA   | AACT | AA   | CC  | T    | CA   | AAA  | CA  | AA   | T   | GAT  | AA   | CA |
|                                        |        |             |      |     |      |     |      |      |      |     |      |      |      |     |      |     |      |      |    |



SARS-CoV-2 + human DNA.apr

|                                        |        |             |         |        |            |         |          |          |          |          |           |       |       |       |       |         |        |          |       |         |       |      |     |       |     |     |      |     |     |      |     |      |     |    |     |     |     |     |     |     |    |     |    |     |      |      |
|----------------------------------------|--------|-------------|---------|--------|------------|---------|----------|----------|----------|----------|-----------|-------|-------|-------|-------|---------|--------|----------|-------|---------|-------|------|-----|-------|-----|-----|------|-----|-----|------|-----|------|-----|----|-----|-----|-----|-----|-----|-----|----|-----|----|-----|------|------|
|                                        |        | Section 113 |         |        |            |         |          |          |          |          |           |       |       |       |       |         |        |          |       |         |       |      |     |       |     |     |      |     |     |      |     |      |     |    |     |     |     |     |     |     |    |     |    |     |      |      |
|                                        |        | (9521)      | 9521    | 9530   | 9540       | 9550    | 9560     | 9570     | 9580     | 9590     | 9605      |       |       |       |       |         |        |          |       |         |       |      |     |       |     |     |      |     |     |      |     |      |     |    |     |     |     |     |     |     |    |     |    |     |      |      |
| SARS-CoV-2 Region 11168 - 29055 nt     | (9310) | GT          | TCATCT  | AAGTGT | TGTGTGTT   | CTGTTAT | TGATTTAT | TACTGT   | TGATTTTG | TGAATATA | AAATCCCAA | GATT  | TATCT | G     | TAGT  |         |        |          |       |         |       |      |     |       |     |     |      |     |     |      |     |      |     |    |     |     |     |     |     |     |    |     |    |     |      |      |
| Homo sapiens mitochondrion NC_012920.1 | (8751) | AA          | TCATTT  | TTTAT  | T-TGCCACAA | CTAACC  | TCTCTCGG | ACTCT    | GCC      | TCACTCAT | TTACACC   | AACCA | ---   | CCCAA | C---  | TATCT   | ATA    | TAA      |       |         |       |      |     |       |     |     |      |     |     |      |     |      |     |    |     |     |     |     |     |     |    |     |    |     |      |      |
|                                        |        | Section 114 |         |        |            |         |          |          |          |          |           |       |       |       |       |         |        |          |       |         |       |      |     |       |     |     |      |     |     |      |     |      |     |    |     |     |     |     |     |     |    |     |    |     |      |      |
|                                        |        | (9606)      | 9606    | 9620   | 9630       | 9640    | 9650     | 9660     | 9670     | 9680     | 9690      |       |       |       |       |         |        |          |       |         |       |      |     |       |     |     |      |     |     |      |     |      |     |    |     |     |     |     |     |     |    |     |    |     |      |      |
| SARS-CoV-2 Region 11168 - 29055 nt     | (9395) | TT          | CTAAGGT | TGTCA  | AAGTGAC    | TAT     | TGAC     | TAT-ACAG | AAATT    | TCATT    | TAT       | GCTTT | G     | TGTAA | AAGAT | GGCCATG | TAG    | AAACATTT | TA    |         |       |      |     |       |     |     |      |     |     |      |     |      |     |    |     |     |     |     |     |     |    |     |    |     |      |      |
| Homo sapiens mitochondrion NC_012920.1 | (8829) | C-          | CTAGCCA | TGGC   | CAATCCCCT  | TAT     | GAGC     | GGGC     | ACAG     | TG       | ATT       | A---- | TAG   | GCTTT | C     | GCTCT   | AAGAT  | -----    | TA    | AAATGCC | TA    |      |     |       |     |     |      |     |     |      |     |      |     |    |     |     |     |     |     |     |    |     |    |     |      |      |
|                                        |        | Section 115 |         |        |            |         |          |          |          |          |           |       |       |       |       |         |        |          |       |         |       |      |     |       |     |     |      |     |     |      |     |      |     |    |     |     |     |     |     |     |    |     |    |     |      |      |
|                                        |        | (9691)      | 9691    | 9700   | 9710       | 9720    | 9730     | 9740     | 9750     | 9760     | 9775      |       |       |       |       |         |        |          |       |         |       |      |     |       |     |     |      |     |     |      |     |      |     |    |     |     |     |     |     |     |    |     |    |     |      |      |
| SARS-CoV-2 Region 11168 - 29055 nt     | (9479) | C           | CCAA    | AAAT-- | TACAA      | TCTAG   | TCA      | AGCG     | TGGCA    | ACC      | GGG       | TGT   | TG    | CTAT  | G     | CTAA    | TCTTTA | CAAAA    | TGCAA | AGAA    | TG    | CTAT | TAG | AAA   |     |     |      |     |     |      |     |      |     |    |     |     |     |     |     |     |    |     |    |     |      |      |
| Homo sapiens mitochondrion NC_012920.1 | (8902) | G           | CCCA    | ACTT   | CT         | TAC     | CA-CA    | AGGCA    | CACT     | TAC--    | ACC       | CCT   | TAT   | CC    | C     | ATAC    | TAGT   | TATTAT   | C     | AAA     | CCATC | AGCC | TA  | CTCAT | TCA | AA  | C    |     |     |      |     |      |     |    |     |     |     |     |     |     |    |     |    |     |      |      |
|                                        |        | Section 116 |         |        |            |         |          |          |          |          |           |       |       |       |       |         |        |          |       |         |       |      |     |       |     |     |      |     |     |      |     |      |     |    |     |     |     |     |     |     |    |     |    |     |      |      |
|                                        |        | (9776)      | 9776    | 9790   | 9800       | 9810    | 9820     | 9830     | 9840     | 9850     | 9860      |       |       |       |       |         |        |          |       |         |       |      |     |       |     |     |      |     |     |      |     |      |     |    |     |     |     |     |     |     |    |     |    |     |      |      |
| SARS-CoV-2 Region 11168 - 29055 nt     | (9562) | AG          | TGT     | G      | CCT        | T       | CAAAAT   | TAT      | G        | GTG      | A         | TAG   | TGC   | AAC   | ATT   | AC      | TAA    | AG       | GC    | A--     | TAAT  | GAT  | GA  | AT    | G   | T   | CGC  | AAA | AT  | ATA  | CT  | CA   | ACT | G  | TGT |     |     |     |     |     |    |     |    |     |      |      |
| Homo sapiens mitochondrion NC_012920.1 | (8984) | CA          | ATA     | G      | CCT        | T       | GGCCG--  | TAC      | G        | CCT      | A         | ACCG  | CT    | AAC   | ATT   | AC      | TGC    | AG       | GC    | CA      | CC    | TA   | C   | TAT   | G   | AC  | CT   | A   | CC  | TA-- | ATT | GG   | A   | AG | C   | GC  | AC  | CC  | TAG |     |    |     |    |     |      |      |
|                                        |        | Section 117 |         |        |            |         |          |          |          |          |           |       |       |       |       |         |        |          |       |         |       |      |     |       |     |     |      |     |     |      |     |      |     |    |     |     |     |     |     |     |    |     |    |     |      |      |
|                                        |        | (9861)      | 9861    | 9870   | 9880       | 9890    | 9900     | 9910     | 9920     | 9930     | 9945      |       |       |       |       |         |        |          |       |         |       |      |     |       |     |     |      |     |     |      |     |      |     |    |     |     |     |     |     |     |    |     |    |     |      |      |
| SARS-CoV-2 Region 11168 - 29055 nt     | (9645) | CA          | ATAT    | TTA    | AAC        | CA      | TTA      | AC       | ATT      | AG       | CT        | G     | TAC   | CCT-  | ATA   | AT      | AT     | G-AG     | AG    | TTA     | TAC   | ATT  | T   | TGG   | TG  | CT  | GG   | TT  | CT- | GAT  | AA  | AG   | GA  | GT | TG  |     |     |     |     |     |    |     |    |     |      |      |
| Homo sapiens mitochondrion NC_012920.1 | (9065) | CA          | ATAT    | C--    | AAC-       | CAT     | TAA      | C        | TT       | CC       | CT        | C     | TAC   | ACT   | TAT   | CAT     | CT     | T        | C     | ACA     | ATT   | C    | TA- | ATT   | C   | TAC | TG   | ACT | AT  | C    | CTA | G    | AA  | AT | C   | G   | CT  | GT  | C   | G   |    |     |    |     |      |      |
|                                        |        | Section 118 |         |        |            |         |          |          |          |          |           |       |       |       |       |         |        |          |       |         |       |      |     |       |     |     |      |     |     |      |     |      |     |    |     |     |     |     |     |     |    |     |    |     |      |      |
|                                        |        | (9946)      | 9946    | 9960   | 9970       | 9980    | 9990     | 10000    | 10010    | 10020    | 10030     |       |       |       |       |         |        |          |       |         |       |      |     |       |     |     |      |     |     |      |     |      |     |    |     |     |     |     |     |     |    |     |    |     |      |      |
| SARS-CoV-2 Region 11168 - 29055 nt     | (9727) | C           | ACC     | A      | GGT        | TAC     | AGC-     | T        | G        | TT       | TT        | AAG   | ACA   | G     | T     | GG      | T      | TG       | CCT   | A       | GGG   | TAC  | G   | CTGC  | TT  | G   | T    | C   | G   | ATT  | CAG | AT   | CT  | TA | AT  | GAC | TTT | GT  | CT  | CTG | AT | G   |    |     |      |      |
| Homo sapiens mitochondrion NC_012920.1 | (9146) | C           | CTT     | A      | AT         | CCA     | AGC      | C        | T        | ACG      | TT        | TTC   | ACA   | CT    | T     | CT      | TAG    | TAAG     | C     | CTC     | TAC-  | CTGC | AC  | G     | ACA | CA  | ---- | TA  | AT  | GAC  | C   | ---- | CAC | CA | AT- | -   | -   | -   | -   | -   |    |     |    |     |      |      |
|                                        |        | Section 119 |         |        |            |         |          |          |          |          |           |       |       |       |       |         |        |          |       |         |       |      |     |       |     |     |      |     |     |      |     |      |     |    |     |     |     |     |     |     |    |     |    |     |      |      |
|                                        |        | (10031)     | 10031   | 10040  | 10050      | 10060   | 10070    | 10080    | 10090    | 10100    | 10115     |       |       |       |       |         |        |          |       |         |       |      |     |       |     |     |      |     |     |      |     |      |     |    |     |     |     |     |     |     |    |     |    |     |      |      |
| SARS-CoV-2 Region 11168 - 29055 nt     | (9811) | C           | A       | G      | AT         | T       | C        | A        | A        | CT       | T         | T     | G     | A     | T     | G       | G      | T        | G     | A       | T     | G    | T   | G     | C   | A   | A    | C   | T   | G    | T   | A    | T   | G  | T   | G   | A   | T   | G   | T   | A  | C   | G  | ACC | CTAA |      |
| Homo sapiens mitochondrion NC_012920.1 | (9220) | C           | A       | C      | AT         | G       | C        | --       | CT       | AT       | C         | AT    | ----- | AT    | AGT   | AA      | AA     | C        | CCAG  | C       | CC    | AT   | G   | A     | C   | CCC | TAA  | CA  | GGG | GC   | C   | T    | C   | T  | C   | A   | G   | CCC | T   | CC  | TA | --- | AT | G   | ACC  | TCCG |

SARS-CoV-2 + human DNA.apr

|                                        |         |                           |                              |                   |                      |                 |              |                |            |            |              |
|----------------------------------------|---------|---------------------------|------------------------------|-------------------|----------------------|-----------------|--------------|----------------|------------|------------|--------------|
|                                        |         | Section 120               |                              |                   |                      |                 |              |                |            |            |              |
|                                        | (10116) | 10116                     | 10130                        | 10140             | 10150                | 10160           | 10170        | 10180          | 10190      | 10200      |              |
| SARS-CoV-2 Region 11168 - 29055 nt     | (9896)  | GACTAAAAATGTTACAAAAAGAAAA | TGACTCTAAAGAGGGTTT           | TTTTCACCTACATT    | TGTGGGTTTATACAACAAAG | CTAGCTCT        |              |                |            |            |              |
| Homo sapiens mitochondrion NC_012920.1 | (9295)  | GCTAGCCATGTGATTTCAAC---   | TTCACCTCCATAACGCTC----       | CTCATAC           | TAGGCCTACTAACCAACACA | --CTAAC-CAT     |              |                |            |            |              |
|                                        |         | Section 121               |                              |                   |                      |                 |              |                |            |            |              |
|                                        | (10201) | 10201                     | 10210                        | 10220             | 10230                | 10240           | 10250        | 10260          | 10270      | 10285      |              |
| SARS-CoV-2 Region 11168 - 29055 nt     | (9981)  | GGAGGTTCCGTGGCTAT         | AAAGATAACA                   | GACATTCTTG        | GAAATGCTGATCTTTAT    | AAGCTCATGGGACAC | TTCGCAT      | TGGTGGACAG     |            |            |              |
| Homo sapiens mitochondrion NC_012920.1 | (9368)  | ATACCAATGATGGCG           | ATG--TAACA                   | CGA-----GAAAGC    | ACATACC--AAGGC       | CACCAACACAC     | CACCTGTCCAAA | AAGG           |            |            |              |
|                                        |         | Section 122               |                              |                   |                      |                 |              |                |            |            |              |
|                                        | (10286) | 10286                     | 10300                        | 10310             | 10320                | 10330           | 10340        | 10350          | 10360      | 10370      |              |
| SARS-CoV-2 Region 11168 - 29055 nt     | (10066) | CCTTTGTAC---              | TAATGTGAATGCGTCATCATCTGAAGCA | TTTTTAAT          | TGGATGTAA            | TTATCTTG        | GCAACCA      | CGCGAACAA      |            |            |              |
| Homo sapiens mitochondrion NC_012920.1 | (9440)  | CCTTCGATACGGGA            | TAATCCTATTATTA--             | CTCAGGAAGTT       | TTTTTCTTCG           | CAGG-ATTTT      | TCTGAGC----- | CTTTTACCA      |            |            |              |
|                                        |         | Section 123               |                              |                   |                      |                 |              |                |            |            |              |
|                                        | (10371) | 10371                     | 10380                        | 10390             | 10400                | 10410           | 10420        | 10430          | 10440      | 10455      |              |
| SARS-CoV-2 Region 11168 - 29055 nt     | (10147) | TAGATGGTTATGTCATGCA       | AATTA                        | CATATTTT          | GGAGGAATAC           | AAATCCAAAT      | CAGTTGTC     | TTCC           | TATTCT     | TTATTGACAT |              |
| Homo sapiens mitochondrion NC_012920.1 | (9516)  | TCCA-GCC                  | TAGCCCTTACCCC                | CAATTA-----       | GGAGGGC-AC           | TGGCCCCCAA      | CAGGCATTCAC  | CCG--CTAAAT    | CCCCCTAG   |            |              |
|                                        |         | Section 124               |                              |                   |                      |                 |              |                |            |            |              |
|                                        | (10456) | 10456                     | 10470                        | 10480             | 10490                | 10500           | 10510        | 10520          | 10530      | 10540      |              |
| SARS-CoV-2 Region 11168 - 29055 nt     | (10232) | GAGTAAATT                 | TCCCTTAAATTA                 | AGGGGTACTGCTGTTAT | GTCTTTAAAG           | AAGGTCAA        | ATCAATGATA   | TGATTTTAT      | CTCTTCTT   |            |              |
| Homo sapiens mitochondrion NC_012920.1 | (9589)  | AAGTCCCAC                 | TCC---TAAACAC                | ATCCGTATTACT      | CGCATC-----          | AGGAGT---       | ATCAATCACC   | TGAGCTCACCATAG | CTCT       |            |              |
|                                        |         | Section 125               |                              |                   |                      |                 |              |                |            |            |              |
|                                        | (10541) | 10541                     | 10550                        | 10560             | 10570                | 10580           | 10590        | 10600          | 10610      | 10625      |              |
| SARS-CoV-2 Region 11168 - 29055 nt     | (10317) | AGTAAAGGTAGAC             | TTATAA                       | TTAGAGAA          | AAACAAGAG            | TGTATT          | TCTAGT       | GATGTTCT       | TGTTAA     | CAACTAAAC  | GAAACAATGTTT |
| Homo sapiens mitochondrion NC_012920.1 | (9659)  | AATAGAAAACA               | ACCGA-AA                     | CCAAATAA          | TTCAA                | GC-ACTGCTTATT   | ACAA         | TTT--TACT      | GGGTCTCTAT | TTTAC      | CCTC-----    |
|                                        |         | Section 126               |                              |                   |                      |                 |              |                |            |            |              |
|                                        | (10626) | 10626                     | 10640                        | 10650             | 10660                | 10670           | 10680        | 10690          | 10700      | 10710      |              |
| SARS-CoV-2 Region 11168 - 29055 nt     | (10402) | GT                        | TTTTCTTG                     | TTTTATTG          | CACTAGTCTCTAG        | TCA             | GTGTGT       | TAATCTTA       | CAAC       | CAGAACTCA  | ATTACCCCTG   |
| Homo sapiens mitochondrion NC_012920.1 | (9733)  | --TACAAGCC                | TCAGAGTACTT                  | CGAGTCTCCCT       | TCA                  | CCATT           | CCGAGGG-CAT  | CTACGGCTCA     | AC-ATTTTTT | TGTAGC     | CAC--AGG     |

SARS-CoV-2 + human DNA.apr

SARS-CoV-2 + human DNA.apr

|                                                |         |             |       |       |       |       |       |       |       |       |       |
|------------------------------------------------|---------|-------------|-------|-------|-------|-------|-------|-------|-------|-------|-------|
|                                                |         | Section 134 |       |       |       |       |       |       |       |       |       |
|                                                | (11306) | 11306       | 11320 | 11330 | 11340 | 11350 | 11360 | 11370 | 11380 | 11390 |       |
| SARS-CoV-2 Reaion 11168 - 29055 nt (11074)     |         | G           | T     | A     | G     | A     | T     | T     | G     | C     | C     |
| Homo sapiens mitochondrion NC_012920.1 (10338) |         | T           | A     | ----- | ----- | ----- | ----- | ----- | ----- | ----- | ----- |
|                                                |         | Section 135 |       |       |       |       |       |       |       |       |       |
|                                                | (11391) | 11391       | 11400 | 11410 | 11420 | 11430 | 11440 | 11450 | 11460 | 11475 |       |
| SARS-CoV-2 Reaion 11168 - 29055 nt (11157)     |         | T           | T     | C     | T     | C     | A     | G     | G     | T     | T     |
| Homo sapiens mitochondrion NC_012920.1 (10407) |         | G           | T     | A     | T     | A     | G     | T     | T     | A     | A     |
|                                                |         | Section 136 |       |       |       |       |       |       |       |       |       |
|                                                | (11476) | 11476       | 11490 | 11500 | 11510 | 11520 | 11530 | 11540 | 11550 | 11560 |       |
| SARS-CoV-2 Reaion 11168 - 29055 nt (11242)     |         | G           | G     | A     | A     | C     | C     | A     | T     | T     | A     |
| Homo sapiens mitochondrion NC_012920.1 (10474) |         | C           | C     | C     | T     | C     | A     | T     | T     | A     | A     |
|                                                |         | Section 137 |       |       |       |       |       |       |       |       |       |
|                                                | (11561) | 11561       | 11570 | 11580 | 11590 | 11600 | 11610 | 11620 | 11630 | 11645 |       |
| SARS-CoV-2 Reaion 11168 - 29055 nt (11327)     |         | G           | A     | A     | T     | C     | T     | A     | T     | C     | A     |
| Homo sapiens mitochondrion NC_012920.1 (10554) |         | T           | C     | C     | ----- | ----- | ----- | ----- | ----- | ----- | ----- |
|                                                |         | Section 138 |       |       |       |       |       |       |       |       |       |
|                                                | (11646) | 11646       | 11660 | 11670 | 11680 | 11690 | 11700 | 11710 | 11720 | 11730 |       |
| SARS-CoV-2 Reaion 11168 - 29055 nt (11412)     |         | T           | G     | A     | A     | G     | T     | T     | T     | A     | A     |
| Homo sapiens mitochondrion NC_012920.1 (10636) |         | C           | C     | A     | A     | T     | A     | G     | T     | T     | A     |
|                                                |         | Section 139 |       |       |       |       |       |       |       |       |       |
|                                                | (11731) | 11731       | 11740 | 11750 | 11760 | 11770 | 11780 | 11790 | 11800 | 11815 |       |
| SARS-CoV-2 Reaion 11168 - 29055 nt (11497)     |         | C           | T     | A     | T     | A     | A     | A     | T     | T     | C     |
| Homo sapiens mitochondrion NC_012920.1 (10692) |         | C           | T     | A     | G     | ----- | ----- | ----- | ----- | ----- | ----- |
|                                                |         | Section 140 |       |       |       |       |       |       |       |       |       |
|                                                | (11816) | 11816       | 11830 | 11840 | 11850 | 11860 | 11870 | 11880 | 11890 | 11900 |       |
| SARS-CoV-2 Reaion 11168 - 29055 nt (11582)     |         | A           | T     | G     | C     | A     | G     | A     | T     | T     | G     |
| Homo sapiens mitochondrion NC_012920.1 (10765) |         | A           | A     | A     | A     | C     | T     | A     | A     | T     | A     |

SARS-CoV-2 + human DNA.apr

|                                        |         |                                                                                      |                                              |                              |          |              |       |       |       |       |             |
|----------------------------------------|---------|--------------------------------------------------------------------------------------|----------------------------------------------|------------------------------|----------|--------------|-------|-------|-------|-------|-------------|
|                                        |         |                                                                                      |                                              |                              |          |              |       |       |       |       | Section 141 |
|                                        | (11901) | 11901                                                                                | 11910                                        | 11920                        | 11930    | 11940        | 11950 | 11960 | 11970 | 11985 |             |
| SARS-CoV-2 Region 11168 - 29055 nt     | (11667) | ATTACGAGATGATTTTACAGGCTGCGTTATAGCTTGG                                                | AATTCTAACATCTTGAT                            | TCTAAGGTTGGTGG               | TAAATTAT | AATTAACCTG   |       |       |       |       |             |
| Homo sapiens mitochondrion NC_012920.1 | (10832) | ATCAACAACACCCACAGCCT                                                                 | -----                                        | AATTATTAGCATCTCCCTCTACTATTTT | ---TAA   | CCAAATCAACA- |       |       |       |       |             |
|                                        |         |                                                                                      |                                              |                              |          |              |       |       |       |       |             |
|                                        |         |                                                                                      |                                              |                              |          |              |       |       |       |       | Section 142 |
|                                        | (11986) | 11986                                                                                | 12000                                        | 12010                        | 12020    | 12030        | 12040 | 12050 | 12060 | 12070 |             |
| SARS-CoV-2 Region 11168 - 29055 nt     | (11752) | TATAGATGTGTTTAGGAAGTCTAACTCTCAACCTTTTGAGAGAGATATTT                                   | CAACTGAAATCTATCAGGCCGGTAG                    | CACACCTTGTA                  |          |              |       |       |       |       |             |
| Homo sapiens mitochondrion NC_012920.1 | (10899) | -ACAACCTATTTTAG-----CTGTCTCCCAACCTTTTCC-----TCGACCC--CTAACAAACCC-----CCTCCTAAATA     |                                              |                              |          |              |       |       |       |       |             |
|                                        |         |                                                                                      |                                              |                              |          |              |       |       |       |       |             |
|                                        |         |                                                                                      |                                              |                              |          |              |       |       |       |       | Section 143 |
|                                        | (12071) | 12071                                                                                | 12080                                        | 12090                        | 12100    | 12110        | 12120 | 12130 | 12140 | 12155 |             |
| SARS-CoV-2 Region 11168 - 29055 nt     | (11837) | ATGGTGTTGAAAGGTTTAAATTGTACTTTCTTTACAATCATATGTTTCCAAC-CCACTAATGGTGTGGTTACCAACATACA    |                                              |                              |          |              |       |       |       |       |             |
| Homo sapiens mitochondrion NC_012920.1 | (10961) | CT-----AACTACCTGACTCCCTAC---CCCTACAATCATG-GCAAGCCAACGCCACTTATCCAATGTG----AACACATCAC  |                                              |                              |          |              |       |       |       |       |             |
|                                        |         |                                                                                      |                                              |                              |          |              |       |       |       |       |             |
|                                        |         |                                                                                      |                                              |                              |          |              |       |       |       |       | Section 144 |
|                                        | (12156) | 12156                                                                                | 12170                                        | 12180                        | 12190    | 12200        | 12210 | 12220 | 12230 | 12240 |             |
| SARS-CoV-2 Region 11168 - 29055 nt     | (11921) | GAGTAGTAGTACTTTCTTTTGAACTTCTACATGCACAGCAACTGTTTGTGGACC                               | TAAAAAGTCTAC                                 | TAATTTGTTAAACAA              |          |              |       |       |       |       |             |
| Homo sapiens mitochondrion NC_012920.1 | (11031) | GAAAAAACT-CTACCTCTCTA--TACTA-ATCTCCCTACAAATCTCCTT--AATATAACAATTCACAGCCACA            | GAACTAATCAT                                  |                              |          |              |       |       |       |       |             |
|                                        |         |                                                                                      |                                              |                              |          |              |       |       |       |       |             |
|                                        |         |                                                                                      |                                              |                              |          |              |       |       |       |       | Section 145 |
|                                        | (12241) | 12241                                                                                | 12250                                        | 12260                        | 12270    | 12280        | 12290 | 12300 | 12310 | 12325 |             |
| SARS-CoV-2 Region 11168 - 29055 nt     | (12006) | ATGTGTCAATTTCAACTTCAATGGTTTAAACAGGCACAGGTGTTCTTACTGAGTCTAACAAAAAGTTCTGCTTTCCAACAATTT |                                              |                              |          |              |       |       |       |       |             |
| Homo sapiens mitochondrion NC_012920.1 | (11110) | ATTTT---ATACTCTTCTTCGA-----AAC---CACACTTATCCCCACCTTGCTATCA-----TCACCCGATGAGGCAACCA   |                                              |                              |          |              |       |       |       |       |             |
|                                        |         |                                                                                      |                                              |                              |          |              |       |       |       |       |             |
|                                        |         |                                                                                      |                                              |                              |          |              |       |       |       |       | Section 146 |
|                                        | (12326) | 12326                                                                                | 12340                                        | 12350                        | 12360    | 12370        | 12380 | 12390 | 12400 | 12410 |             |
| SARS-CoV-2 Region 11168 - 29055 nt     | (12091) | GGCAGAGACATTGCTGACCTACTGATGCTGTCTCGTGA                                               | TCACAGACTTGAGATTCTTGACATTACACCATGTTCTTTTGGTG |                              |          |              |       |       |       |       |             |
| Homo sapiens mitochondrion NC_012920.1 | (11176) | GCAGAG---ACGCCTGACACGACAGGCACATACCTCTATCTACACCTAGTAGGCTCCCTTCCCTACTCATCGCACTAAAT---- |                                              |                              |          |              |       |       |       |       |             |
|                                        |         |                                                                                      |                                              |                              |          |              |       |       |       |       |             |
|                                        |         |                                                                                      |                                              |                              |          |              |       |       |       |       | Section 147 |
|                                        | (12411) | 12411                                                                                | 12420                                        | 12430                        | 12440    | 12450        | 12460 | 12470 | 12480 | 12495 |             |
| SARS-CoV-2 Region 11168 - 29055 nt     | (12176) | GTTGTAGTGTATAACACAGGAAACAATACTTCTAACAGGTTGCTGTCTTTATCAGGATGTTAACTGCACAGAGTCCCTGT     |                                              |                              |          |              |       |       |       |       |             |
| Homo sapiens mitochondrion NC_012920.1 | (11254) | -TTACACTCACAAACACCTAGGCTCA-----CTAAACATTCCTACTCTCA-----CTGCCAGAACTATCA               |                                              |                              |          |              |       |       |       |       |             |

## SARS-CoV-2 + human DNA.apr

|                                                |         |               |                |                |                 |             |               |             |            |           |                |
|------------------------------------------------|---------|---------------|----------------|----------------|-----------------|-------------|---------------|-------------|------------|-----------|----------------|
|                                                |         | Section 148   |                |                |                 |             |               |             |            |           |                |
|                                                | (12496) | 12496         | 12510          | 12520          | 12530           | 12540       | 12550         | 12560       | 12570      | 12580     |                |
| SARS-CoV-2 Region 11168 - 29055 nt (12261)     |         | TGCTATTCATGCA | GATCAACTTACT   | CCTACTTGGCGTGT | TTATTTCTACAGGTT | CTAATGT     | TTTTCAAAC     | ACGTG       | CAGGCT     | TTTA      |                |
| Homo sapiens mitochondrion NC_012920.1 (11321) |         | AACTCCTAGCA   | A--CAACTTAA    | TATGACTAGC     | -----TTACA      | CAATAGCTTT  | TATAGT        | -----AAAGA  | --TAC      | ---CTCTTA |                |
|                                                |         | Section 149   |                |                |                 |             |               |             |            |           |                |
|                                                | (12581) | 12581         | 12590          | 12600          | 12610           | 12620       | 12630         | 12640       | 12650      | 12665     |                |
| SARS-CoV-2 Region 11168 - 29055 nt (12346)     |         | ATAGGGGCTGA   | ACATGTCAACAACT | CATATGAGTGT    | -GACATA         | CCCATTTGGTG | CAGGTAT       | ATGCGCTAG   | TTATCAG    | ACTCAG    | ACT            |
| Homo sapiens mitochondrion NC_012920.1 (11389) |         | C---GGACTCC   | ACTTATGACTCC   | CTAAGCCCA      | TGTCGAAGCC      | CCCATC      | GCTG--GGT     | CAATAG--TAC | TTGCC      | CGCAGT    | ---ACT         |
|                                                |         | Section 150   |                |                |                 |             |               |             |            |           |                |
|                                                | (12666) | 12666         | 12680          | 12690          | 12700           | 12710       | 12720         | 12730       | 12740      | 12750     |                |
| SARS-CoV-2 Region 11168 - 29055 nt (12430)     |         | AAATCTCTCT    | GGCGGACG       | TAGTGTAGCTAGT  | CAATCCATCATT    | GCTACCTAT   | TGTCACTTGGTGC | AGAAAA      | ATT        | CAGTTG    | CTT            |
| Homo sapiens mitochondrion NC_012920.1 (11464) |         | CTTAAAACT     | AGGCGGCTATG    | --GTATA        | ATACGCTCA       | CACTCATTCT  | CAACCC        | TGACA       | AAACACAT   | AGCCT     | ATCCCTTCTT     |
|                                                |         | Section 151   |                |                |                 |             |               |             |            |           |                |
|                                                | (12751) | 12751         | 12760          | 12770          | 12780           | 12790       | 12800         | 12810       | 12820      | 12835     |                |
| SARS-CoV-2 Region 11168 - 29055 nt (12515)     |         | ACTCTAAATA    | CTCTAT-T       | GCATA          | CCCACAA         | ATTTTACT    | ATTAGTGT      | TACACAGAA   | ATTC-TACC  | AGTGTCT   | ATGACCAAGACA   |
| Homo sapiens mitochondrion NC_012920.1 (11546) |         | G---TAC       | TATCCTAT       | GAGGCATA       | ATTATTA         | CAAGCTCAT   | CTGCTT        | ACGACA      | ACAGAC     | TAAATC    | GCTCATGCTACTCT |
|                                                |         | Section 152   |                |                |                 |             |               |             |            |           |                |
|                                                | (12836) | 12836         | 12850          | 12860          | 12870           | 12880       | 12890         | 12900       | 12910      | 12920     |                |
| SARS-CoV-2 Region 11168 - 29055 nt (12598)     |         | TCA           | GTAGAT         | TGTA           | CAATGTACAT      | TTGTGGT     | GAT--TCAA     | -CTGA       | ATGCAGCAAT | CTTTTGT   | TGCAATATG      |
| Homo sapiens mitochondrion NC_012920.1 (11627) |         | TCA           | -----AT        | CAGC           | CATAGG          | CCCTCGT     | AGTAACAGC     | CATTCT      | CA         | TCCAAC    | CCCCTGAA       |
|                                                |         | Section 153   |                |                |                 |             |               |             |            |           |                |
|                                                | (12921) | 12921         | 12930          | 12940          | 12950           | 12960       | 12970         | 12980       | 12990      | 13005     |                |
| SARS-CoV-2 Region 11168 - 29055 nt (12680)     |         | AAT           | TAAAC          | -CGT           | GCTTTAA         | CTGGAAT     | AGCTGT        | TGAACAAGA   | CAAAAC     | CA        | CCCAAGAA       |
| Homo sapiens mitochondrion NC_012920.1 (11707) |         | AAT           | CGCC           | CA             | CGG             | GCTT        | ACAT          | CCCTCAT     | TAATTCTG   | CTAG      | CAAACTCAAA     |
|                                                |         | Section 154   |                |                |                 |             |               |             |            |           |                |
|                                                | (13006) | 13006         | 13020          | 13030          | 13040           | 13050       | 13060         | 13070       | 13080      | 13090     |                |
| SARS-CoV-2 Region 11168 - 29055 nt (12764)     |         | AAA           | CACCA          | CAATTA         | AAAGATT         | TTGGT       | GGTTT         | TAA         | ----       | TTTTT     | CACAATAT       |
| Homo sapiens mitochondrion NC_012920.1 (11790) |         | TCT           | CTCA           | AGGAC          | TTCAA           | -ACTCT      | ACTCCCAC      | TAA         | TAGC       | TTTTT     | GATGACTTCTAG   |

## SARS-CoV-2 + human DNA.apr

|                                                |         |                                     |                      |                      |            |                |           |                |            |             |                     |
|------------------------------------------------|---------|-------------------------------------|----------------------|----------------------|------------|----------------|-----------|----------------|------------|-------------|---------------------|
|                                                |         | Section 155                         |                      |                      |            |                |           |                |            |             |                     |
|                                                | (13091) | 13091                               | 13100                | 13110                | 13120      | 13130          | 13140     | 13150          | 13160      | 13175       |                     |
| SARS-CoV-2 Reaion 11168 - 29055 nt (12845)     |         | T-TATTGAAGATCTACTTTTCAACAAA         | GTGACACTTG           | CAGATGCTGGCTTCATCAAA | ---        | CAATATGGTGATTG | CCTGGT    | GA             | TATA       |             |                     |
| Homo sapiens mitochondrion NC_012920.1 (11873) |         | AC-TATTAACTAGGGAGAACTCTCTGTGCTAGTAA | C-ACGTCTCTCTGATCAAA  | TATCACTCTCCTAC       | TTACAGGAC  | TCAAC          |           |                |            |             |                     |
|                                                |         | Section 156                         |                      |                      |            |                |           |                |            |             |                     |
|                                                | (13176) | 13176                               | 13190                | 13200                | 13210      | 13220          | 13230     | 13240          | 13250      | 13260       |                     |
| SARS-CoV-2 Reaion 11168 - 29055 nt (12926)     |         | T-TGCTGCT-AGAGACCTCATTTGTG          | CAACAAAGTTTAA        | CGGCTTAC             | TGTTTTGC   | CACCTTTG       | CTCAGATG  | AAATGAT        | TGCTC      |             |                     |
| Homo sapiens mitochondrion NC_012920.1 (11957) |         | A-TACTAGTCAACAGCCCT-AT              | ACTCCGTCTACATA       | TTTACCA              | CAACACAA   | TGGGCTCA       | CTCAC     | CACCA          | ATTAA      | CAACA       | T----               |
|                                                |         | Section 157                         |                      |                      |            |                |           |                |            |             |                     |
|                                                | (13261) | 13261                               | 13270                | 13280                | 13290      | 13300          | 13310     | 13320          | 13330      | 13345       |                     |
| SARS-CoV-2 Reaion 11168 - 29055 nt (13010)     |         | AAATACACTTCTTGCACTGTTAG             | CGGGTACA             | ATCACTTCTTGGT        | TGGACCTT   | TGGTG          | CAGG-TG   | CTGCAT         | TACAAAT    | ACCATT      | TGCTA               |
| Homo sapiens mitochondrion NC_012920.1 (12037) |         | AAAACCTCATTCACAC---                 | GAGAAAACA            | CCCTCATGTTCA         | TACACCTA   | TCCCC          | CA        | TTCCTCT        | CTATC      | CCTCA       | ACC                 |
|                                                |         | Section 158                         |                      |                      |            |                |           |                |            |             |                     |
|                                                | (13346) | 13346                               | 13360                | 13370                | 13380      | 13390          | 13400     | 13410          | 13420      | 13430       |                     |
| SARS-CoV-2 Reaion 11168 - 29055 nt (13094)     |         | TGC                                 | AAATGGCTTATAGGTT-TAA | TGGTA-TTGG           | AGTTACACA  | GATGTTCTCTAT   | GAGAAC    | CAAA           | AATTGATTG  | CC          | AACCAATTT           |
| Homo sapiens mitochondrion NC_012920.1 (12119) |         | ATT                                 | ACCGGGTTTCTCTCTTTG   | TAAATATA             | TAGTTTAA   | CCAAACA        | ATCAGATTG | TGAATCTGA      | --CAA      | AGAGGCTTA   | CGACCC--TT          |
|                                                |         | Section 159                         |                      |                      |            |                |           |                |            |             |                     |
|                                                | (13431) | 13431                               | 13440                | 13450                | 13460      | 13470          | 13480     | 13490          | 13500      | 13515       |                     |
| SARS-CoV-2 Reaion 11168 - 29055 nt (13177)     |         | AA                                  | TAGTGC               | TATTGGCAAAAT         | TCAAGACT   | CACTTTCTTCA    | CAGCAAGTG | CAC            | TGGAAAC    | TTCAAGATG   | TGGTCAACCAA-AA      |
| Homo sapiens mitochondrion NC_012920.1 (12200) |         | A                                   | T-----TACC           | GAGAAAGCTCA          | -----CA    | AGAACTGCTA     | ACTCATG   | CCCATG         | TCTAACAA   | CATGCTTTC   | TCAACTTTTAAA        |
|                                                |         | Section 160                         |                      |                      |            |                |           |                |            |             |                     |
|                                                | (13516) | 13516                               | 13530                | 13540                | 13550      | 13560          | 13570     | 13580          | 13590      | 13600       |                     |
| SARS-CoV-2 Reaion 11168 - 29055 nt (13261)     |         | G                                   | CACAA                | GCTTTAAACA           | CGCTTGTTAA | CAACCTTA       | GCTCC     | AAATTTTGGTGCAA | TTTCAAG    | TGTTTTAAATG | ATATCCTTTTACAGT-    |
| Homo sapiens mitochondrion NC_012920.1 (12275) |         | G                                   | ATAA                 | CAGCTATCA            | TTGGTCTTA  | GGGCC          | AAA-----  | AAATTTTGGTGCAA | CTC        | CAAA        | TAA---AAGTA         |
|                                                |         | Section 161                         |                      |                      |            |                |           |                |            |             |                     |
|                                                | (13601) | 13601                               | 13610                | 13620                | 13630      | 13640          | 13650     | 13660          | 13670      | 13685       |                     |
| SARS-CoV-2 Reaion 11168 - 29055 nt (13345)     |         | -                                   | CT-TG                | ACAAAGTTG            | AGGCTGA    | AGTGCA-AA      | TTGATAGGT | TGATTC         | ACAGGCAGAC | TTCAAAGTTTG | CAGACATATGTGACTCAAC |
| Homo sapiens mitochondrion NC_012920.1 (12352) |         | A                                   | CTATA                | ACCACCC              | TAAACC     | CTGA           | CTTCCCT   | AAAT           | CCCCCAT    | CTTTAC      | CACCTCTGTT-AA       |
|                                                |         | Section 162                         |                      |                      |            |                |           |                |            |             |                     |
|                                                | (13685) | 13685                               | 13690                | 13700                | 13710      | 13720          | 13730     | 13740          | 13750      | 13765       |                     |
| SARS-CoV-2 Reaion 11168 - 29055 nt (13345)     |         | -                                   | CT-TG                | ACAAAGTTG            | AGGCTGA    | AGTGCA-AA      | TTGATAGGT | TGATTC         | ACAGGCAGAC | TTCAAAGTTTG | CAGACATATGTGACTCAAC |
| Homo sapiens mitochondrion NC_012920.1 (12352) |         | A                                   | CTATA                | ACCACCC              | TAAACC     | CTGA           | CTTCCCT   | AAAT           | CCCCCAT    | CTTTAC      | CACCTCTGTT-AA       |

SARS-CoV-2 + human DNA.apr

|                                                |         |             |        |          |        |        |         |        |        |        |        |
|------------------------------------------------|---------|-------------|--------|----------|--------|--------|---------|--------|--------|--------|--------|
|                                                |         | Section 162 |        |          |        |        |         |        |        |        |        |
|                                                | (13686) | 13686       | 13700  | 13710    | 13720  | 13730  | 13740   | 13750  | 13760  | 13770  |        |
| SARS-CoV-2 Region 11168 - 29055 nt (13427)     | A       | ATTAA       | TAGAA  | ----GCTG | CAGAA  | ATCAG  | GAGCTTC | TGCTA  | ATCTTG | CTGCTG | CTACT  |
| Homo sapiens mitochondrion NC_012920.1 (12436) | C       | ATTATG      | TAAAT  | CCATG    | TCTG   | CAATC  | CACTT   | TATAT  | ATCAG  | TCTCTT | CCACA  |
|                                                |         | Section 163 |        |          |        |        |         |        |        |        |        |
|                                                | (13771) | 13771       | 13780  | 13790    | 13800  | 13810  | 13820   | 13830  | 13840  | 13855  |        |
| SARS-CoV-2 Region 11168 - 29055 nt (13508)     | A       | AAGAGT      | TGATT  | TTGTG    | GAAAG  | GGCTAT | CATCTT  | TATGTC | CTTCC  | CTCAGT | CAGCAC |
| Homo sapiens mitochondrion NC_012920.1 (12514) | G       | AAG---      | TATTAT | TC-T     | CGAAC  | TGAGC  | -----   | CACAA  | CCCAA  | CAACC  | CAGCT  |
|                                                |         | Section 164 |        |          |        |        |         |        |        |        |        |
|                                                | (13856) | 13856       | 13870  | 13880    | 13890  | 13900  | 13910   | 13920  | 13930  | 13940  |        |
| SARS-CoV-2 Region 11168 - 29055 nt (13593)     | T       | TATG        | TCCCTG | CA       | CAAG   | AAAGAA | AGAACT  | TCACA  | AC     | TGCTC  | TGC    |
| Homo sapiens mitochondrion NC_012920.1 (12586) | T       | ACTT---     | CTC    | CA       | TAA    | TATTC  | ATCCCT  | GTA    | GCAT   | TGTTA  | CAT    |
|                                                |         | Section 165 |        |          |        |        |         |        |        |        |        |
|                                                | (13941) | 13941       | 13950  | 13960    | 13970  | 13980  | 13990   | 14000  | 14010  | 14025  |        |
| SARS-CoV-2 Region 11168 - 29055 nt (13677)     | C       | TTTG        | TTTCA  | AAATGG   | CA     | CACTGG | TTTGT   | ACAC   | CAAGG  | AATTT  | --TT   |
| Homo sapiens mitochondrion NC_012920.1 (12663) | C       | TCA         | GACC   | CAAA     | CATT   | AATCAG | TCTT    | CAAA   | TATCT  | ACTATC | TTCC   |
|                                                |         | Section 166 |        |          |        |        |         |        |        |        |        |
|                                                | (14026) | 14026       | 14040  | 14050    | 14060  | 14070  | 14080   | 14090  | 14100  | 14110  |        |
| SARS-CoV-2 Region 11168 - 29055 nt (13757)     | T       | TGTGT       | CTGG   | TAACT    | GTGAT  | GTTGT  | AATAG   | GAAT   | TTAG   | GAAT   | TTAG   |
| Homo sapiens mitochondrion NC_012920.1 (12748) | T       | TCCAA       | CTGT   | TCA      | TCTGG  | CTGAG  | AGGCG   | TAGGA  | ATTAT  | ATCCTT | C----  |
|                                                |         | Section 167 |        |          |        |        |         |        |        |        |        |
|                                                | (14111) | 14111       | 14120  | 14130    | 14140  | 14150  | 14160   | 14170  | 14180  | 14195  |        |
| SARS-CoV-2 Region 11168 - 29055 nt (13841)     | A       | GAGGA       | AGTTAG | ATAA     | ATTATT | AAGAA  | TCA     | TACAT  | CAC    | AGAT   | -GTT   |
| Homo sapiens mitochondrion NC_012920.1 (12824) | A       | TGCCA       | ACAC   | AGC-A    | GCCATT | CAAGC  | AATC    | TATACA | ACC    | GTATC  | GGC    |
|                                                |         | Section 168 |        |          |        |        |         |        |        |        |        |
|                                                | (14196) | 14196       | 14210  | 14220    | 14230  | 14240  | 14250   | 14260  | 14270  | 14280  |        |
| SARS-CoV-2 Region 11168 - 29055 nt (13925)     | T       | AA-ACA      | TC     | AAA      | AAGAA  | ATTGA  | CCGCT   | CAA    | TGAG   | GTTGC  | CAAGA  |
| Homo sapiens mitochondrion NC_012920.1 (12905) | T       | CCTACA      | TC     | CA       | CTCAT  | GAGAC  | CCACA   | CAA    | ATAG   | CCCTT  | CTAA   |



SARS-CoV-2 + human DNA.apr

|                                                |         |             |           |         |          |            |            |         |         |          |             |
|------------------------------------------------|---------|-------------|-----------|---------|----------|------------|------------|---------|---------|----------|-------------|
|                                                |         | Section 169 |           |         |          |            |            |         |         |          |             |
|                                                | (14281) | 14281       | 14290     | 14300   | 14310    | 14320      | 14330      | 14340   | 14350   | 14365    |             |
| SARS-CoV-2 Region 11168 - 29055 nt (14009)     |         | AGTA        | TGAGCAGT  | ATATAAA | ATGGCC   | ATGGTACAT  | TTGGCT     | AGGTTT  | ATAGCT  | GGCTTG   | ATTGCCATAGT |
| Homo sapiens mitochondrion NC_012920.1 (12989) |         | --TA        | GCAGCAGCA | GGCAAA  | TCAAGCC  | CAATTA     | GGTCT--    | CACCCC  | TGA--   | CTCCCTCA | --GCCATAGAA |
|                                                |         | Section 170 |           |         |          |            |            |         |         |          |             |
|                                                | (14366) | 14366       | 14380     | 14390   | 14400    | 14410      | 14420      | 14430   | 14440   | 14450    |             |
| SARS-CoV-2 Region 11168 - 29055 nt (14094)     |         | GCTTT       | GC        | TGTA    | TGAC---  | CAGTTG     | CTGTAGTTGT | CTCAAG  | GGCTGT  | TGTTCTTT | GTGGATCC    |
| Homo sapiens mitochondrion NC_012920.1 (13065) |         | -CTCA       | GCCTTA    | CTCCT   | ACTCAGCA | CTATAGTTGT | AGCAG      | GAA---  | TCTTCTT | ACTCATCC | -GCTTCA     |
|                                                |         | Section 171 |           |         |          |            |            |         |         |          |             |
|                                                | (14451) | 14451       | 14460     | 14470   | 14480    | 14490      | 14500      | 14510   | 14520   | 14535    |             |
| SARS-CoV-2 Region 11168 - 29055 nt (14176)     |         | TC          | TGAG      | CCAG    | TGCTG    | CAAA       | GGAGT      | CAAA    | TACA    | -TTACAC  | ---ATA      |
| Homo sapiens mitochondrion NC_012920.1 (13143) |         | --TAGC      | CCA       | CTTAA   | TC       | CAAA       | ACTCT      | TAA     | CAC     | TATGC    | TTAGG       |
|                                                |         | Section 172 |           |         |          |            |            |         |         |          |             |
|                                                | (14536) | 14536       | 14550     | 14560   | 14570    | 14580      | 14590      | 14600   | 14610   | 14620    |             |
| SARS-CoV-2 Region 11168 - 29055 nt (14256)     |         | GGAA        | CTGTAA    | CTTTGA  | AGCAAGG  | TGAAT      | -CAAG      | GATGCTA | ---CTC  | CTTCAGAT | TTTGTTCG    |
| Homo sapiens mitochondrion NC_012920.1 (13226) |         | ACAT        | C         | AAA     | AAATCG   | TAGC       | CTTCT      | CCACT   | TCAAG   | TCAA     | CTAGGA      |
|                                                |         | Section 173 |           |         |          |            |            |         |         |          |             |
|                                                | (14621) | 14621       | 14630     | 14640   | 14650    | 14660      | 14670      | 14680   | 14690   | 14705    |             |
| SARS-CoV-2 Region 11168 - 29055 nt (14337)     |         | CAAG        | CCT-      | CAC     | TCCTT    | CGGAT      | GGCTT      | GTTG    | GGCT    | TGC      | ACTTCT      |
| Homo sapiens mitochondrion NC_012920.1 (13310) |         | CA          | TT        | CCT     | G        | CAC        | ATCTG      | TAG     | CCAC    | GCCTT    | CTTCAAA     |
|                                                |         | Section 174 |           |         |          |            |            |         |         |          |             |
|                                                | (14706) | 14706       | 14720     | 14730   | 14740    | 14750      | 14760      | 14770   | 14780   | 14790    |             |
| SARS-CoV-2 Region 11168 - 29055 nt (14419)     |         | TC          | AAA       | AAGA    | GAT--    | GC         | AACTAG     | CA--    | CTCTC   | CAA      | GGGTG       |
| Homo sapiens mitochondrion NC_012920.1 (13392) |         | TG          | AA        | C       | AAGA     | TAT        | TC         | G       | AAA     | A        | TAG         |
|                                                |         | Section 175 |           |         |          |            |            |         |         |          |             |
|                                                | (14791) | 14791       | 14800     | 14810   | 14820    | 14830      | 14840      | 14850   | 14860   | 14875    |             |
| SARS-CoV-2 Region 11168 - 29055 nt (14496)     |         | TACTC       | ACAC      | CT      | TTT      | GCTC       | ----       | GTT     | GCT     | GCT      | GG          |
| Homo sapiens mitochondrion NC_012920.1 (13477) |         | GCAGG       | AATA      | C       | TTT      | CCTC       | ACAG       | GTT     | TCT     | ACT--    | CC          |

SARS-CoV-2 + human DNA.apr

|                                                |         |             |           |        |        |        |        |        |       |       |       |
|------------------------------------------------|---------|-------------|-----------|--------|--------|--------|--------|--------|-------|-------|-------|
|                                                |         | Section 176 |           |        |        |        |        |        |       |       |       |
|                                                | (14876) | 14876       | 14890     | 14900  | 14910  | 14920  | 14930  | 14940  | 14950 | 14960 |       |
| SARS-CoV-2 Reaion 11168 - 29055 nt (14577)     |         | ATAA        | AACTTTGTA | AGAATA | ATAA   | TGAGG  | CTTTGG | CTTTGC | TGGAA | ATGC  | CGTTC |
| Homo sapiens mitochondrion NC_012920.1 (13560) |         | CCTA        | TCTAT-TA  | CTCTCA | TGCGT  | TACCTG | CTTGAC | AA-GC  | -GCCT | ATAG  | CACTC |
|                                                |         | Section 177 |           |        |        |        |        |        |       |       |       |
|                                                | (14961) | 14961       | 14970     | 14980  | 14990  | 15000  | 15010  | 15020  | 15030 | 15045 |       |
| SARS-CoV-2 Reaion 11168 - 29055 nt (14660)     |         | TTTTC       | TTTGG     | TGGGA  | TACTAA | TTGT   | TACGA  | CTAT   | TGTAT | ACCTT | ACAA  |
| Homo sapiens mitochondrion NC_012920.1 (13642) |         | CGCT        | -TCCC     | CACCG  | TACTAA | CATTA  | ACGA   | AAAT   | A---- | ACCC  | ACCC  |
|                                                |         | Section 178 |           |        |        |        |        |        |       |       |       |
|                                                | (15046) | 15046       | 15060     | 15070  | 15080  | 15090  | 15100  | 15110  | 15120 | 15130 |       |
| SARS-CoV-2 Reaion 11168 - 29055 nt (14742)     |         | GATG        | GCA       | CAACA  | GTCT   | TATT   | CTGA   | AACAT  | GACTA | CCAG  | AT    |
| Homo sapiens mitochondrion NC_012920.1 (13722) |         | ATTC        | GCA       | GGATT  | TCAT   | TACT   | TAAC   | AACAT  | TTCC  | CCGC  | AT    |
|                                                |         | Section 179 |           |        |        |        |        |        |       |       |       |
|                                                | (15131) | 15131       | 15140     | 15150  | 15160  | 15170  | 15180  | 15190  | 15200 | 15215 |       |
| SARS-CoV-2 Reaion 11168 - 29055 nt (14827)     |         | TTGT        | TATTA     | CACAG  | TACTT  | CACT   | TCA    | GACT   | ATTA  | CCAGC | TG    |
| Homo sapiens mitochondrion NC_012920.1 (13805) |         | CCC         | T----     | CGT    | GTCA   | CTT    | TC     | CTAG   | -GACT | TC    | TAC   |
|                                                |         | Section 180 |           |        |        |        |        |        |       |       |       |
|                                                | (15216) | 15216       | 15230     | 15240  | 15250  | 15260  | 15270  | 15280  | 15290 | 15300 |       |
| SARS-CoV-2 Reaion 11168 - 29055 nt (14912)     |         | CTTCT       | TCAT      | CTACA  | ATTA   | AAAT   | TGTG   | TGA    | TGA   | AGC   | CT    |
| Homo sapiens mitochondrion NC_012920.1 (13882) |         | CCACT       | --AT      | GCA    | CA     | TTT    | ATT    | CT     | CCA   | ACA   | TACT  |
|                                                |         | Section 181 |           |        |        |        |        |        |       |       |       |
|                                                | (15301) | 15301       | 15310     | 15320  | 15330  | 15340  | 15350  | 15360  | 15370 | 15385 |       |
| SARS-CoV-2 Reaion 11168 - 29055 nt (14993)     |         | TA--        | ATCCA     | GTA    | ATG    | GAA    | CCA    | ATT    | TAT   | GAT   | GAA   |
| Homo sapiens mitochondrion NC_012920.1 (13965) |         | TACG        | AGCCA     | AAAC   | CTG    | CCCT   | TACT   | CCCT   | TAG   | ACCT  | GACTA |
|                                                |         | Section 182 |           |        |        |        |        |        |       |       |       |
|                                                | (15386) | 15386       | 15400     | 15410  | 15420  | 15430  | 15440  | 15450  | 15460 | 15470 |       |
| SARS-CoV-2 Reaion 11168 - 29055 nt (15076)     |         | TATG        | TAT       | CTC    | AT     | TCG    | TTT    | CGGA   | AGAG  | CA    | GGT   |
| Homo sapiens mitochondrion NC_012920.1 (14048) |         | TCTCC       | AC        | CTC    | CA     | TCA    | TCA    | CTCA   | -ACCA | AAAA  | AGGC  |

SARS-CoV-2 + human DNA.apr

|                                                |         |             |       |       |       |       |       |       |       |       |   |
|------------------------------------------------|---------|-------------|-------|-------|-------|-------|-------|-------|-------|-------|---|
|                                                |         | Section 183 |       |       |       |       |       |       |       |       |   |
|                                                | (15471) | 15471       | 15480 | 15490 | 15500 | 15510 | 15520 | 15530 | 15540 | 15555 |   |
| SARS-CoV-2 Region 11168 - 29055 nt (15161)     |         | A           | G     | T     | T     | A     | C     | A     | C     | T     | A |
| Homo sapiens mitochondrion NC_012920.1 (14127) |         | A           | A     | C     | C     | T     | A     | C     | T     | A     | C |
|                                                |         | Section 184 |       |       |       |       |       |       |       |       |   |
|                                                | (15556) | 15556       | 15570 | 15580 | 15590 | 15600 | 15610 | 15620 | 15630 | 15640 |   |
| SARS-CoV-2 Region 11168 - 29055 nt (15245)     |         | T           | T     | A     | C     | G     | T     | T     | A     | C     | T |
| Homo sapiens mitochondrion NC_012920.1 (14211) |         | C           | T     | A     | C     | T     | A     | C     | G     | T     | T |
|                                                |         | Section 185 |       |       |       |       |       |       |       |       |   |
|                                                | (15641) | 15641       | 15650 | 15660 | 15670 | 15680 | 15690 | 15700 | 15710 | 15725 |   |
| SARS-CoV-2 Region 11168 - 29055 nt (15325)     |         | A           | G     | T     | T     | T     | T     | C     | T     | A     | C |
| Homo sapiens mitochondrion NC_012920.1 (14296) |         | A           | A     | T     | T     | A     | T     | T     | T     | A     | C |
|                                                |         | Section 186 |       |       |       |       |       |       |       |       |   |
|                                                | (15726) | 15726       | 15740 | 15750 | 15760 | 15770 | 15780 | 15790 | 15800 | 15810 |   |
| SARS-CoV-2 Region 11168 - 29055 nt (15406)     |         | T           | G     | A     | A     | C     | A     | A     | C     | T     | A |
| Homo sapiens mitochondrion NC_012920.1 (14379) |         | C           | C     | A     | T     | C     | G     | C     | T     | A     | C |
|                                                |         | Section 187 |       |       |       |       |       |       |       |       |   |
|                                                | (15811) | 15811       | 15820 | 15830 | 15840 | 15850 | 15860 | 15870 | 15880 | 15895 |   |
| SARS-CoV-2 Region 11168 - 29055 nt (15488)     |         | T           | T     | T     | T     | G     | T     | A     | T     | A     | A |
| Homo sapiens mitochondrion NC_012920.1 (14461) |         | T           | G     | T     | A     | G     | T     | A     | T     | A     | A |
|                                                |         | Section 188 |       |       |       |       |       |       |       |       |   |
|                                                | (15896) | 15896       | 15910 | 15920 | 15930 | 15940 | 15950 | 15960 | 15970 | 15980 |   |
| SARS-CoV-2 Region 11168 - 29055 nt (15572)     |         | A           | T     | A     | A     | A     | T     | G     | G     | A     | T |
| Homo sapiens mitochondrion NC_012920.1 (14546) |         | A           | T     | A     | A     | T     | G     | G     | A     | T     | G |
|                                                |         | Section 189 |       |       |       |       |       |       |       |       |   |
|                                                | (15981) | 15981       | 15990 | 16000 | 16010 | 16020 | 16030 | 16040 | 16050 | 16065 |   |
| SARS-CoV-2 Region 11168 - 29055 nt (15657)     |         | G           | A     | C     | T     | G     | T     | T     | G     | C     | G |
| Homo sapiens mitochondrion NC_012920.1 (14603) |         | G           | A     | C     | T     | G     | T     | T     | G     | C     | G |

SARS-CoV-2 + human DNA.apr

|                                                |         |             |       |       |       |       |       |       |       |       |         |
|------------------------------------------------|---------|-------------|-------|-------|-------|-------|-------|-------|-------|-------|---------|
|                                                |         | Section 190 |       |       |       |       |       |       |       |       |         |
|                                                | (16066) | 16066       | 16080 | 16090 | 16100 | 16110 | 16120 | 16130 | 16140 | 16150 |         |
| SARS-CoV-2 Region 11168 - 29055 nt (15742)     |         | GA          | C     | C     | A     | G     | A     | C     | C     | T     | T       |
| Homo sapiens mitochondrion NC_012920.1 (14680) |         | CG          | C     | ---   | AC    | GG    | A     | ---   | CTA   | CAA   | CCACGAC |
|                                                |         | Section 191 |       |       |       |       |       |       |       |       |         |
|                                                | (16151) | 16151       | 16160 | 16170 | 16180 | 16190 | 16200 | 16210 | 16220 | 16235 |         |
| SARS-CoV-2 Region 11168 - 29055 nt (15742)     |         | C           | G     | C     | T     | G     | T     | G     | A     | C     | A       |
| Homo sapiens mitochondrion NC_012920.1 (14754) |         | C           | A     | A     | T     | A     | C     | A     | T     | C     | A       |
|                                                |         | Section 192 |       |       |       |       |       |       |       |       |         |
|                                                | (16236) | 16236       | 16250 | 16260 | 16270 | 16280 | 16290 | 16300 | 16310 | 16320 |         |
| SARS-CoV-2 Region 11168 - 29055 nt (15912)     |         | G           | T     | G     | T     | A     | G     | C     | A     | G     | G       |
| Homo sapiens mitochondrion NC_012920.1 (14836) |         | A           | T     | G     | A     | A     | C     | T     | T     | C     | G       |
|                                                |         | Section 193 |       |       |       |       |       |       |       |       |         |
|                                                | (16321) | 16321       | 16330 | 16340 | 16350 | 16360 | 16370 | 16380 | 16390 | 16405 |         |
| SARS-CoV-2 Region 11168 - 29055 nt (15996)     |         | G           | T     | G     | A     | C     | A     | T     | A     | T     | C       |
| Homo sapiens mitochondrion NC_012920.1 (14903) |         | A           | T     | G     | -     | C     | A     | T     | A     | C     | T       |
|                                                |         | Section 194 |       |       |       |       |       |       |       |       |         |
|                                                | (16406) | 16406       | 16420 | 16430 | 16440 | 16450 | 16460 | 16470 | 16480 | 16490 |         |
| SARS-CoV-2 Region 11168 - 29055 nt (16079)     |         | A           | C     | T     | A     | A     | T     | T     | A     | T     | A       |
| Homo sapiens mitochondrion NC_012920.1 (14973) |         | G           | C     | T     | G     | A     | ---   | AT    | C     | A     | T       |
|                                                |         | Section 195 |       |       |       |       |       |       |       |       |         |
|                                                | (16491) | 16491       | 16500 | 16510 | 16520 | 16530 | 16540 | 16550 | 16560 | 16575 |         |
| SARS-CoV-2 Region 11168 - 29055 nt (16164)     |         | C           | T     | A     | C     | T     | G     | A     | A     | T     | A       |
| Homo sapiens mitochondrion NC_012920.1 (15052) |         | A           | T     | A     | T     | -     | T     | A     | C     | G     | A       |
|                                                |         | Section 196 |       |       |       |       |       |       |       |       |         |
|                                                | (16576) | 16576       | 16590 | 16600 | 16610 | 16620 | 16630 | 16640 | 16650 | 16660 |         |
| SARS-CoV-2 Region 11168 - 29055 nt (16249)     |         | C           | A     | C     | T     | G     | A     | T     | A     | C     | A       |
| Homo sapiens mitochondrion NC_012920.1 (15111) |         | C           | A     | C     | T     | G     | A     | T     | A     | C     | A       |

SARS-CoV-2 + human DNA.apr

Figure 1 displays the schematic representation of the SARS-CoV-2 Region 11168 - 29055 nt (16661-16745) and its alignment with the Homo sapiens mitochondrion NC\_012920.1. The figure is organized into seven sections, each showing a segment of the SARS-CoV-2 genome (top row) and the corresponding human mitochondrial sequence (bottom row). The alignment is color-coded: red for Adenine (A), green for Cytosine (C), blue for Guanine (G), and yellow for Thymine (T). The alignment shows high sequence identity, with some mismatches highlighted in red. The SARS-CoV-2 sequence is shown in the top row of each section, and the human mitochondrial sequence is shown in the bottom row. The alignment is presented in a tabular format with columns for the SARS-CoV-2 sequence, the human mitochondrial sequence, and the alignment score.

| Section     | SARS-CoV-2 Region 11168 - 29055 nt (16661-16745)              | Homo sapiens mitochondrion NC_012920.1                                                                                                                                            |
|-------------|---------------------------------------------------------------|-----------------------------------------------------------------------------------------------------------------------------------------------------------------------------------|
| Section 197 | (16661) 16661 16670 16680 16690 16700 16710 16720 16730 16745 | (16334) T T C T G G A A C A T A C G A G G G C A A T T C A C C A T T T C A T C C T C T A G C T G A T A A C C A A T T T G C A C T G A C T T G C T T A G C A C T C A A T T T G C T   |
| Section 198 | (16746) 16746 16760 16770 16780 16790 16800 16810 16820 16830 | (16419) T T T G C T T G T C C T G A C G G G C G T A A A A C A C G T C T A T C A G T T A C G T G C C A G A T C A G T T C A C C T A A A C T G T T C A T C A G A C A A G A G G A A G |
| Section 199 | (16831) 16831 16840 16850 16860 16870 16880 16890 16900 16915 | (16504) T T C A G A A C T T T A C T C T C C A A T T T T T C T T A T T G T T G C G G C A A T A G T G T T T A T A A C A C T T T G C T T C A C A C T C A A A A G A A A G A C A G A   |
| Section 200 | (16916) 16916 16930 16940 16950 16960 16970 16980 16990 17000 | (16589) A T G A T T G A A C T T T C A C C C T T A C T T G A C T T C T A T T T G T G C T T T T A G C C T T C T G C T A T T C C T T G T T T A A T T A T G C T T A T T A T C T       |
| Section 201 | (17001) 17001 17010 17020 17030 17040 17050 17060 17070 17085 | (16671) T T T G G T T C T C A C T T G A A C T G C A A G A T C A T A A T G A A A C T T G T C A C G C C T A A A C G A A C A T G A A A T T T C T T G T T T T C T T A G G A A T C A T |
| Section 202 | (17086) 17086 17100 17110 17120 17130 17140 17150 17160 17170 | (16756) C A C A A C T G T A G C T G C A T T T C A C C A A G A A T G T A G T T A C A G T C A T G T A C T C A A C A T C A A C C A T A T G T A G T T G A T G A C C G G T G T C C T   |
| Section 203 | (17171) 17171 17180 17190 17200 17210 17220 17230 17240 17255 | (16841) A T T C A C T T C T A T T C T A A A T G G T A T A T T A G A G T A G G A G C T A G A A A A T C A G C A C C T T T A A T T G A A T T G T G C G T G G A T G A G G C T G G T T |

SARS-CoV-2 + human DNA.apr

|                                                |         |             |       |       |       |       |       |       |       |       |   |
|------------------------------------------------|---------|-------------|-------|-------|-------|-------|-------|-------|-------|-------|---|
|                                                |         | Section 204 |       |       |       |       |       |       |       |       |   |
|                                                | (17256) | 17256       | 17270 | 17280 | 17290 | 17300 | 17310 | 17320 | 17330 | 17340 |   |
| SARS-CoV-2 Region 11168 - 29055 nt (16926)     | C       | T           | A     | A     | T     | C     | A     | T     | C     | C     | C |
| Homo sapiens mitochondrion NC_012920.1 (15692) | A       | T           | A     | T     | T     | C     | G     | C     | C     | C     | A |
|                                                |         | Section 205 |       |       |       |       |       |       |       |       |   |
|                                                | (17341) | 17341       | 17350 | 17360 | 17370 | 17380 | 17390 | 17400 | 17410 | 17425 |   |
| SARS-CoV-2 Region 11168 - 29055 nt (17011)     | G       | G           | T     | A     | G     | T     | C     | T     | T     | G     | T |
| Homo sapiens mitochondrion NC_012920.1 (15776) | A       | G           | T     | A     | C     | C     | T     | T     | T     | A     |   |
|                                                |         | Section 206 |       |       |       |       |       |       |       |       |   |
|                                                | (17426) | 17426       | 17440 | 17450 | 17460 | 17470 | 17480 | 17490 | 17500 | 17510 |   |
| SARS-CoV-2 Region 11168 - 29055 nt (17096)     | A       | A           | C     | A     | A     | C     | T     | A     | A     | A     | T |
| Homo sapiens mitochondrion NC_012920.1 (15840) | T       | A           | A     | T     | A     | C     | T     | A     | T     | C     | T |
|                                                |         | Section 207 |       |       |       |       |       |       |       |       |   |
|                                                | (17511) | 17511       | 17520 | 17530 | 17540 | 17550 | 17560 | 17570 | 17580 | 17595 |   |
| SARS-CoV-2 Region 11168 - 29055 nt (17181)     | C       | A           | G     | T     | A     | A     | C     | C     | G     | A     | G |
| Homo sapiens mitochondrion NC_012920.1 (15919) | T       | G           | T     | A     | A     | C     | C     | G     | A     | G     | T |
|                                                |         | Section 208 |       |       |       |       |       |       |       |       |   |
|                                                | (17596) | 17596       | 17610 | 17620 | 17630 | 17640 | 17650 | 17660 | 17670 | 17680 |   |
| SARS-CoV-2 Region 11168 - 29055 nt (17257)     | T       | C           | T     | T     | G     | G     | T     | T     | C     | A     | C |
| Homo sapiens mitochondrion NC_012920.1 (16003) | T       | C           | T     | T     | A     | A     | C     | T     | A     | T     | T |
|                                                |         | Section 209 |       |       |       |       |       |       |       |       |   |
|                                                | (17681) | 17681       | 17690 | 17700 | 17710 | 17720 | 17730 | 17740 | 17750 | 17765 |   |
| SARS-CoV-2 Region 11168 - 29055 nt (17339)     | G       | C           | A     | G     | T     | C     | C     | A     | G     | A     | T |
| Homo sapiens mitochondrion NC_012920.1 (16083) | -       | C           | G     | C     | T     | A     | T     | G     | T     | A     | T |
|                                                |         | Section 210 |       |       |       |       |       |       |       |       |   |
|                                                | (17766) | 17766       | 17780 | 17790 | 17800 | 17810 | 17820 | 17830 | 17840 | 17850 |   |
| SARS-CoV-2 Region 11168 - 29055 nt (17424)     | A       | A           | G     | A     | T     | G     | T     | A     | T     | T     | C |
| Homo sapiens mitochondrion NC_012920.1 (16151) | C       | T           | G     | -     | T     | A     | G     | T     | A     | C     | A |

SARS-CoV-2 + human DNA.apr

|                                                |  | Section 211 |                                           |                                             |                                     |                                         |                               |                             |                     |                     |       |
|------------------------------------------------|--|-------------|-------------------------------------------|---------------------------------------------|-------------------------------------|-----------------------------------------|-------------------------------|-----------------------------|---------------------|---------------------|-------|
|                                                |  | (17851)     | 17851                                     | 17860                                       | 17870                               | 17880                                   | 17890                         | 17900                       | 17910               | 17920               | 17935 |
| SARS-CoV-2 Region 11168 - 29055 nt (17508)     |  |             | A A C T                                   | G A G G G A G C C T                         | T G A A T A C A C C                 | A A A A G A T C A C A T T G G           | C A C C C G C A A T C C       | T G C T A A C A A T G C T G | C A A T C G T G C T | A C A A C T T C C T |       |
| Homo sapiens mitochondrion NC_012920.1 (16226) |  |             | A A C T                                   | A T C A C A A - C A T C A A C T             | G C A A G T C C A A A G C           | C A C C C C T C A C C C A C T           | A G G A T A C C A A C A A A C | C T A C - - - - - C C A C   | - - - - - C C T     |                     |       |
|                                                |  | Section 212 |                                           |                                             |                                     |                                         |                               |                             |                     |                     |       |
|                                                |  | (17936)     | 17936                                     | 17950                                       | 17960                               | 17970                                   | 17980                         | 17990                       | 18000               | 18010               | 18020 |
| SARS-CoV-2 Region 11168 - 29055 nt (17593)     |  |             | C A A G G A A C A A C A T T G C           | C A A A G G C T T C T A C                   | G C A G A A G G G A G C A G         | A G G C G G C A G T C A A G C           | C T C T T C T C G T T C C T   | C A T C A C G T A G T C     |                     |                     |       |
| Homo sapiens mitochondrion NC_012920.1 (16298) |  |             | T A A C A G T A C A T A G T A C A T       | A A A G C A T T T A C C - -                 | G T A C A T A G C A A T T A - -     | C A G T C A A A T C C T T T C T C G T   | C C - C A T G G A T G A C C C |                             |                     |                     |       |
|                                                |  | Section 213 |                                           |                                             |                                     |                                         |                               |                             |                     |                     |       |
|                                                |  | (18021)     | 18021                                     | 18030                                       | 18040                               | 18050                                   | 18060                         | 18070                       | 18080               | 18090               | 18105 |
| SARS-CoV-2 Region 11168 - 29055 nt (17678)     |  |             | G C A A C A G T T C A A G A A A T T       | C A A C T C C A G G C A G C A G T A G       | G G G A A C T T C T C C T G C T A G | A A T G G C T G G C A A T G C           | G G T G A T G C T G C T       |                             |                     |                     |       |
| Homo sapiens mitochondrion NC_012920.1 (16378) |  |             | C C C T C A G A T - - A G G G G T C G     | C T T G A G C A C C A T C T C C G T         | G A A A - - T C - - - - - A A T A T | C C C G C A C A A G A G - T G           | C T A C T C T C C T           |                             |                     |                     |       |
|                                                |  | Section 214 |                                           |                                             |                                     |                                         |                               |                             |                     |                     |       |
|                                                |  | (18106)     | 18106                                     | 18120                                       | 18130                               | 18140                                   | 18150                         | 18160                       | 18170               | 18180               | 18190 |
| SARS-CoV-2 Region 11168 - 29055 nt (17763)     |  |             | T G C T T T G C T G C T G C T T G         | A C A G A T T G A A C C A G C T G           | A G A G C A A A A T G T C T G G T   | A A A G G C C A A C A A C A A G G C     | C A A A C T G T C A C T       |                             |                     |                     |       |
| Homo sapiens mitochondrion NC_012920.1 (16449) |  |             | C G C T C C G G G C - - C A T A A C A C T | T G G G G G T A G C T A A A G T G A A C T G | T A T C C G A C A T C T G G T T C   | C T A C T T C A G G G T C A T A A A G C | - - T                         |                             |                     |                     |       |
|                                                |  | Section 215 |                                           |                                             |                                     |                                         |                               |                             |                     |                     |       |
|                                                |  | (18191)     | 18191                                     | 18200                                       | 18210                               | 18220                                   | 18231                         |                             |                     |                     |       |
| SARS-CoV-2 Region 11168 - 29055 nt (17848)     |  |             | A A G A A A T C T G C T G C T G A G G     | C T T C T A A G A A G C T C G G             | C A A A A                           |                                         |                               |                             |                     |                     |       |
| Homo sapiens mitochondrion NC_012920.1 (16530) |  |             | A A A T A G C C A C A C G T T C C C       | C T T A - A A T A A G A C A T C A C G A T G |                                     |                                         |                               |                             |                     |                     |       |
