# Supplementary material for: Ubiquitous Micro-Modular Homologies among Genomes from Viruses to Bacteria to Human Mitochondrial DNA: Platforms for Recombination during Evolution?
Source: MDPI journal article supplement (doi:10.3390/v14050885), 2022-04-24
Supplement: s1 [file s1]

SARS-CoV-2 & Alternaria brassicicola endornavirus.apr

|                                                                                                 |       |                                                                                     |     |     |     |     |     |     |     |     |  |
|-------------------------------------------------------------------------------------------------|-------|-------------------------------------------------------------------------------------|-----|-----|-----|-----|-----|-----|-----|-----|--|
|                                                                                                 |       | Section 1                                                                           |     |     |     |     |     |     |     |     |  |
| SARS-CoV-2 Reference Genome NC_045512.2<br>Alternaria brassicicola endornavirus isolate 1 NC... | (1)   | 1                                                                                   | 10  | 20  | 30  | 40  | 50  | 60  | 70  | 80  |  |
|                                                                                                 | (1)   | ATTAAAGGTTTATACCTTCCCAGGTAACAAACCAACCACTTTCGATCTCTTGTAGATCTGTTCTCTAAACGAACCTTTAA    |     |     |     |     |     |     |     |     |  |
|                                                                                                 | (1)   | -----                                                                               |     |     |     |     |     |     |     |     |  |
|                                                                                                 |       | Section 2                                                                           |     |     |     |     |     |     |     |     |  |
| SARS-CoV-2 Reference Genome NC_045512.2<br>Alternaria brassicicola endornavirus isolate 1 NC... | (81)  | 81                                                                                  | 90  | 100 | 110 | 120 | 130 | 140 | 150 | 160 |  |
|                                                                                                 | (81)  | AATCTGTGTGGCTGTCACTCGGCTGCATGCTTAGTGCACTCACGCAGTATAATTAATAACTAATTACTGTCGTTGACAGG    |     |     |     |     |     |     |     |     |  |
|                                                                                                 | (1)   | -----                                                                               |     |     |     |     |     |     |     |     |  |
|                                                                                                 |       | Section 3                                                                           |     |     |     |     |     |     |     |     |  |
| SARS-CoV-2 Reference Genome NC_045512.2<br>Alternaria brassicicola endornavirus isolate 1 NC... | (161) | 161                                                                                 | 170 | 180 | 190 | 200 | 210 | 220 | 230 | 240 |  |
|                                                                                                 | (161) | ACACGAGTAACTCGTCTATCTTCTGCAGGCTGCTTACGGTTTCGTCCGTGTTGCAGCCGATCATCAGCACATCTAGGTTT    |     |     |     |     |     |     |     |     |  |
|                                                                                                 | (1)   | -----                                                                               |     |     |     |     |     |     |     |     |  |
|                                                                                                 |       | Section 4                                                                           |     |     |     |     |     |     |     |     |  |
| SARS-CoV-2 Reference Genome NC_045512.2<br>Alternaria brassicicola endornavirus isolate 1 NC... | (241) | 241                                                                                 | 250 | 260 | 270 | 280 | 290 | 300 | 310 | 320 |  |
|                                                                                                 | (241) | CGTCCGGGTGTGACCGAAAGGTAAGATGGAGAGCCTTGTCCTGGTTTCAACGAGAAAACACACGTCCAACCTCAGTTTGC    |     |     |     |     |     |     |     |     |  |
|                                                                                                 | (1)   | -----                                                                               |     |     |     |     |     |     |     |     |  |
|                                                                                                 |       | Section 5                                                                           |     |     |     |     |     |     |     |     |  |
| SARS-CoV-2 Reference Genome NC_045512.2<br>Alternaria brassicicola endornavirus isolate 1 NC... | (321) | 321                                                                                 | 330 | 340 | 350 | 360 | 370 | 380 | 390 | 400 |  |
|                                                                                                 | (321) | CTGTTTTACAGGTTTCGCGACGTGCTCGTACGTGGCTTGGAGACTCCGTGGAGGAGGTCCTTATCAGAGGCACGTCAACAT   |     |     |     |     |     |     |     |     |  |
|                                                                                                 | (1)   | -----GAAATTATAAAACGAATCAAATACTATCAATTTTAAAAACAAACA                                  |     |     |     |     |     |     |     |     |  |
|                                                                                                 |       | Section 6                                                                           |     |     |     |     |     |     |     |     |  |
| SARS-CoV-2 Reference Genome NC_045512.2<br>Alternaria brassicicola endornavirus isolate 1 NC... | (401) | 401                                                                                 | 410 | 420 | 430 | 440 | 450 | 460 | 470 | 480 |  |
|                                                                                                 | (401) | CTTAAAGATGGCACTTGTGGCTTAGTAGAAGTTGAAAAAGGCGTTT-TGCCTCAACTTGAACAGCCCTATGTGTTCAATCA   |     |     |     |     |     |     |     |     |  |
|                                                                                                 | (49)  | CAAATGGAAGGCACACGAATTACATCAACAACATAGAAATCGGGTGTGAGAGCACCCGATTCTGAGTTTCCCCGAATCTC    |     |     |     |     |     |     |     |     |  |
|                                                                                                 |       | Section 7                                                                           |     |     |     |     |     |     |     |     |  |
| SARS-CoV-2 Reference Genome NC_045512.2<br>Alternaria brassicicola endornavirus isolate 1 NC... | (481) | 481                                                                                 | 490 | 500 | 510 | 520 | 530 | 540 | 550 | 560 |  |
|                                                                                                 | (480) | AACGTTTCGGATGCTCGAACTGCACCTCATGGTCACTGTTATGCTTGAAGCTGGTAGCAGAACTCGAAGGCATTCAGTACGGT |     |     |     |     |     |     |     |     |  |
|                                                                                                 | (129) | ACAACAACAACGGGGAACAACAATAAGGGGACATTTGTGCCCATAGATCTACCGCTATCGA-GATAGAGAGGAGATC       |     |     |     |     |     |     |     |     |  |

SARS-CoV-2 & Alternaria brassicicola endornavirus.apr

|                                                            |        |            |                    |                  |                           |              |               |              |                |            |             |         |      |
|------------------------------------------------------------|--------|------------|--------------------|------------------|---------------------------|--------------|---------------|--------------|----------------|------------|-------------|---------|------|
|                                                            |        | Section 8  |                    |                  |                           |              |               |              |                |            |             |         |      |
|                                                            |        | (561)      | 561                | 570              | 580                       | 590          | 600           | 610          | 620            | 630        | 640         |         |      |
| SARS-CoV-2 Reference Genome NC_045512.2                    | (560)  |            | CGTAGTGTGAGACAC    | TTGGTGTCTTGT     | CCCCATCATGTGGGCGAAATAC    | CCAGTGGC     | TTACCGC       | CAAGGTTCT    | TC             | TC         | TCGTAA      |         |      |
| Alternaria brassicicola endornavirus isolate 1 NC_045512.1 | (208)  |            | AGCAGATGGGCCAGCT   | TTGGGCTACTGG     | CCCCCTTCACTTTACACGATCC    | ACTGGGC      | AGCCGTC       | GGAGA        | TC             | AT         | TAGCC       |         |      |
|                                                            |        | Section 9  |                    |                  |                           |              |               |              |                |            |             |         |      |
|                                                            |        | (641)      | 641                | 650              | 660                       | 670          | 680           | 690          | 700            | 710        | 720         |         |      |
| SARS-CoV-2 Reference Genome NC_045512.2                    | (640)  |            | GAACGGT----        | AATAAGGAGCTGGTGG | CATAGTTACGCGCGCATCTAAAGTC | ATTGGA       | TTAGGCG       | ACGA         | GCTTGG         | C          |             |         |      |
| Alternaria brassicicola endornavirus isolate 1 NC_045512.1 | (288)  |            | CGGTGGTGCCCATGATC  | GACAACCTCTTT     | CGAGAGTAATCGACG           | CATGCGG      | ACCTAGA       | TGATTG       | GCTAC          | AGCCGAATTG |             |         |      |
|                                                            |        | Section 10 |                    |                  |                           |              |               |              |                |            |             |         |      |
|                                                            |        | (721)      | 721                | 730              | 740                       | 750          | 760           | 770          | 780            | 790        | 800         |         |      |
| SARS-CoV-2 Reference Genome NC_045512.2                    | (716)  |            | ACTGATCCTTATGAAGAT | TTTCAAGAA        | AACTGGAAACAC              | TAAACATAGCAG | TGGTGT        | TACCCGTGA    | CTCAT          | CGTGA      | GCT         |         |      |
| Alternaria brassicicola endornavirus isolate 1 NC_045512.1 | (368)  |            | AACAATGCTGAGGG     | GCCTGTTCTTG      | TGAAAGCAC                 | CTCAAGCAGGC  | -TGT          | TGCTTATG     | GAGAG          | CGGCGGGC   | GATTG       |         |      |
|                                                            |        | Section 11 |                    |                  |                           |              |               |              |                |            |             |         |      |
|                                                            |        | (801)      | 801                | 810              | 820                       | 830          | 840           | 850          | 860            | 870        | 880         |         |      |
| SARS-CoV-2 Reference Genome NC_045512.2                    | (796)  |            | TACGGAGGGG-        | CATACCTCG        | CTATGTCGAT                | AACAAC       | TCTGTGGCC     | CTGATGGCTA   | CCCTCTTGAGT    | GCATTAA    | AAGAC       |         |      |
| Alternaria brassicicola endornavirus isolate 1 NC_045512.1 | (447)  |            | AACGTCTGAGCT       | CACAAGCTCG       | TACTAGAAGC                | ATAACAA      | TCGGCCGTGC    | CACAGT       | CAATTATCGCCAAG | GGCAG      | AAGG        |         |      |
|                                                            |        | Section 12 |                    |                  |                           |              |               |              |                |            |             |         |      |
|                                                            |        | (881)      | 881                | 890              | 900                       | 910          | 920           | 930          | 940            | 950        | 960         |         |      |
| SARS-CoV-2 Reference Genome NC_045512.2                    | (875)  |            | CTCTAGCAC          | CGTGTGTA         | AAAGCTTT                  | CATGCAC      | TTTGTCTCGAACA | ACTGGACTTTAT | T-TGACA        | CTAAGAGGG  | GTGTATAC    |         |      |
| Alternaria brassicicola endornavirus isolate 1 NC_045512.1 | (527)  |            | TGCTAGCCGCACATG    | TCATCAGCC        | CATGCTTTTGAC              | TTTAGT       | AGTCTTATGGC   | TATGAGC      | CGCAGCCCT      | GTCAACAC   |             |         |      |
|                                                            |        | Section 13 |                    |                  |                           |              |               |              |                |            |             |         |      |
|                                                            |        | (961)      | 961                | 970              | 980                       | 990          | 1000          | 1010         | 1020           | 1030       | 1040        |         |      |
| SARS-CoV-2 Reference Genome NC_045512.2                    | (953)  |            | TGCTGCCGTGAACA     | TGAGCATGA        | AATTGCTTGT                | GACACGGAAC   | GTTCTG        | AAAAGAGCT    | ATGAA          | TTGCAGAC   | ACCTTTTGA   |         |      |
| Alternaria brassicicola endornavirus isolate 1 NC_045512.1 | (607)  |            | AGCCGA----         | AACAACGC         | CAGTCA                    | CATGCTCG     | CCGGCCG       | CTGTGCGAAG   | CAAGAGCT       | TTGTAAAG   | CTTCAAGAGGA | TC      |      |
|                                                            |        | Section 14 |                    |                  |                           |              |               |              |                |            |             |         |      |
|                                                            |        | (1041)     | 1041               | 1050             | 1060                      | 1070         | 1080          | 1090         | 1100           | 1110       | 1120        |         |      |
| SARS-CoV-2 Reference Genome NC_045512.2                    | (1033) |            | AATTAAATTGGCA      | AAAGAATTTGA      | CACCTTCA                  | ATGGGGAATGT  | CCAAATTT      | TGATTTTC     | CCTTA          | AATTC      | CATAATC     | AAAGA   |      |
| Alternaria brassicicola endornavirus isolate 1 NC_045512.1 | (682)  |            | CAAGCATTGCA        | GGGATGCTT        | AAGGACATA                 | ACTGTC       | -AATCG        | CAAGCATCTG   | AAAGACG        | CTATCA     | AGTC        | AGGCTGG | AATT |

SARS-CoV-2 & Alternaria brassicicola endornavirus.apr

|                                         |        |                     |            |            |                |                  |              |            |             |                               |                                         |
|-----------------------------------------|--------|---------------------|------------|------------|----------------|------------------|--------------|------------|-------------|-------------------------------|-----------------------------------------|
|                                         |        | Section 15          |            |            |                |                  |              |            |             |                               |                                         |
| SARS-CoV-2 Reference Genome NC_045512.2 | (1121) | 1121                | 1130       | 1140       | 1150           | 1160             | 1170         | 1180       | 1190        | 1200                          |                                         |
|                                         | (1113) | CTATTTCAACCAAGGGTTG | AAAA       | GAAA       | AGCTTGATGGCT   | TATATGGGTAGAAATT | CGATCTGTCTAT | CCAGTTGCGT | CAACCA      |                               |                                         |
|                                         | (761)  | GACTTGACGTCGTCTCGC  | AA         | TCGCA      | TGACGTATATGGCA | TGGATGGAAACA     | AGA-CGA      | CCGGCTCGT  | TTGCACATA   | TAACGA                        |                                         |
|                                         |        | Section 16          |            |            |                |                  |              |            |             |                               |                                         |
| SARS-CoV-2 Reference Genome NC_045512.2 | (1201) | 1201                | 1210       | 1220       | 1230           | 1240             | 1250         | 1260       | 1270        | 1280                          |                                         |
|                                         | (1193) | AATGAATGC           | AACCA      | AA         | TGTGCCTTTC     | AAC              | TCTCATGAAG   | TGTGATCAT  | TGTGGTGAAAC | TTTCA                         | TGGCAGACGGGCGATTT                       |
|                                         | (840)  | ACGGCATGA           | AACAC      | A          | TGTGTGGCGAG    | AAC              | ATCGAACCA    | CTTGGTTCGT | TATTCCTTTG  | GGCTTCGTGC                    | AACCACTATCA                             |
|                                         |        | Section 17          |            |            |                |                  |              |            |             |                               |                                         |
| SARS-CoV-2 Reference Genome NC_045512.2 | (1281) | 1281                | 1290       | 1300       | 1310           | 1320             | 1330         | 1340       | 1350        | 1360                          |                                         |
|                                         | (1273) | TGTTAAAGC           | CACTTGC    | GAA        | TTTGTG         | GGCAC            | TGAGAA       | ATTTGACTAA | AGAAGGTG    | CCACTA                        | CTTGTG-GTTACTTACC                       |
|                                         | (920)  | ACGTTT              | AGCACAGCAT | GG         | TTGTG          | GTGCT            | TGCTACGACA   | AACTAGACCC | GAGAAATGGG  | CTTCAAC                       | GTTAAACCCCTAAC                          |
|                                         |        | Section 18          |            |            |                |                  |              |            |             |                               |                                         |
| SARS-CoV-2 Reference Genome NC_045512.2 | (1361) | 1361                | 1370       | 1380       | 1390           | 1400             | 1410         | 1420       | 1430        | 1440                          |                                         |
|                                         | (1352) | AATGCTGTT           | GTTAA      | AATTTATTTG | TCTCAGCAT      | GTCAC            | AATTCAGAA    | AGTAGGA    | CTGAGCA     | TAGTCTT                       | GCCGAATACCATAA                          |
|                                         | (1000) | CAAGGC              | GGAGAT     | GCTGCTCG   | TCGCTCA        | AAGAGAA          | ACTGGGACA    | ACAAAG     | TTTCAAGT    | GCA-AGATCA                    | GCCATTTCCAAAC                           |
|                                         |        | Section 19          |            |            |                |                  |              |            |             |                               |                                         |
| SARS-CoV-2 Reference Genome NC_045512.2 | (1441) | 1441                | 1450       | 1460       | 1470           | 1480             | 1490         | 1500       | 1510        | 1520                          |                                         |
|                                         | (1432) | TGAATC              | TGGCTTG    | AAA        | ACCATT         | CTTC             | GTAAG        | GGTGGTGG   | CACTATTG    | CCCTTT                        | GGAGGCTGTGTGTCTCTTATGTTGGTT             |
|                                         | (1079) | TGGATC              | -----      | A--        | ATGGGA         | CAAT             | GTACGTGGGG   | CTCA-TGTTG | AGGAA       | GGCGATGATGAGGTCGATTTAAATCGACT |                                         |
|                                         |        | Section 20          |            |            |                |                  |              |            |             |                               |                                         |
| SARS-CoV-2 Reference Genome NC_045512.2 | (1521) | 1521                | 1530       | 1540       | 1550           | 1560             | 1570         | 1580       | 1590        | 1600                          |                                         |
|                                         | (1512) | GCCA                | TAA        | CAAGT      | TGTGCC         | TATTGG           | GGTTC        | CACGT      | CTAGC       | CTAA                          | CATAGGTTGTAAACCATACA--GGTGTGTTGTTGAGAA  |
|                                         | (1149) | TCCA                | CTT        | CGATT      | TTCATA         | TTTG             | GAAAGT       | GAAAC      | GACATT      | GAGAA                         | AGTGTGTAAGAAACCATATAATAAGGTGACGTTGCCACA |
|                                         |        | Section 21          |            |            |                |                  |              |            |             |                               |                                         |
| SARS-CoV-2 Reference Genome NC_045512.2 | (1601) | 1601                | 1610       | 1620       | 1630           | 1640             | 1650         | 1660       | 1670        | 1680                          |                                         |
|                                         | (1589) | GGTTC               | CGA        | AGGT       | CTTA           | ATG              | ACAA         | CCTTCTTGAA | ATACT       | TCAAAA                        | AGAGAAAGTCAACATCAATATTGTGGTGACTTTAA     |
|                                         | (1229) | GCGAT               | CAAG       | ACGC       | CAGC           | AGGTGCG          | CGCA         | ACTTAGATT  | TACAC       | AA                            | CAGCAAGTATCAACAGCTCGTCAAGCGCAACGC       |

SARS-CoV-2 & Alternaria brassicicola endornavirus.apr

|                                                      |        |                                                                                                          |      |      |      |      |      |      |      |      |      |
|------------------------------------------------------|--------|----------------------------------------------------------------------------------------------------------|------|------|------|------|------|------|------|------|------|
|                                                      |        | Section 22                                                                                               |      |      |      |      |      |      |      |      |      |
|                                                      |        | (1681)                                                                                                   | 1681 | 1690 | 1700 | 1710 | 1720 | 1730 | 1740 | 1750 | 1760 |
| SARS-CoV-2 Reference Genome NC_045512.2              | (1669) | AC TTAA TGA AGA GATCGCC ATT AT TTTGGCATCT TTT CTGC TTCCACA AGTG CT TT TG TGGAAACT GTGA AA GGT TTGG       |      |      |      |      |      |      |      |      |      |
| Alternaria brassicicola endornavirus isolate 1 NC... | (1309) | TA T GCG TGA TT ACCAAAT - ACC AT CCAACACCAG TGA TGCCA TAGT AGA CG CA CT GT CG CT G GCGTGG CCC AA CCGAACA |      |      |      |      |      |      |      |      |      |
|                                                      |        | Section 23                                                                                               |      |      |      |      |      |      |      |      |      |
|                                                      |        | (1761)                                                                                                   | 1761 | 1770 | 1780 | 1790 | 1800 | 1810 | 1820 | 1830 | 1840 |
| SARS-CoV-2 Reference Genome NC_045512.2              | (1749) | A TTAT AAAGCA TTCA AACAAA TT GTTG AAT CCTGTG GTAAT TT TAAAG TTAC AAAAGGA AAAAGC TAA AAAAG GTG CCT GG     |      |      |      |      |      |      |      |      |      |
| Alternaria brassicicola endornavirus isolate 1 NC... | (1388) | T TTAT CAAAGT TAGT AACAAA GC G GAC AAT GGGCAC GCTTAT CACGCG GCGAA CAG GGA CTT GG TAA GAG AGAAC CTA GT    |      |      |      |      |      |      |      |      |      |
|                                                      |        | Section 24                                                                                               |      |      |      |      |      |      |      |      |      |
|                                                      |        | (1841)                                                                                                   | 1841 | 1850 | 1860 | 1870 | 1880 | 1890 | 1900 | 1910 | 1920 |
| SARS-CoV-2 Reference Genome NC_045512.2              | (1829) | A ATATT GGT GAA CAG AAAT CAATACT GAGTCCTCTT TAT GCAT TTGCATC AGAGGCTG CTCGT GTT GTT ACGA TC AATTTT       |      |      |      |      |      |      |      |      |      |
| Alternaria brassicicola endornavirus isolate 1 NC... | (1468) | C ATGA - GGT TCC CGA AGA G GGCCTA GTTGTGGACA TA GTTGGT TGCATAT AGCAGC CACATTAG GAA GT GGCT TCTGGAAC      |      |      |      |      |      |      |      |      |      |
|                                                      |        | Section 25                                                                                               |      |      |      |      |      |      |      |      |      |
|                                                      |        | (1921)                                                                                                   | 1921 | 1930 | 1940 | 1950 | 1960 | 1970 | 1980 | 1990 | 2000 |
| SARS-CoV-2 Reference Genome NC_045512.2              | (1909) | C TCCCGCA CTCT TGAAA CT GCTCAA AAT TCTGTGC GTGTTTTA CAGAA GGGCC GCTATAAC AATACTAG ATGG AAATT TCAC        |      |      |      |      |      |      |      |      |      |
| Alternaria brassicicola endornavirus isolate 1 NC... | (1547) | G TG CATAG CTGCTT TC -- C G GTTTT AGAT GAGAAT GATGCCAA GAGGAAAT GGAA AACG ACACAGGA ATCA AAAA TTAC        |      |      |      |      |      |      |      |      |      |
|                                                      |        | Section 26                                                                                               |      |      |      |      |      |      |      |      |      |
|                                                      |        | (2001)                                                                                                   | 2001 | 2010 | 2020 | 2030 | 2040 | 2050 | 2060 | 2070 | 2080 |
| SARS-CoV-2 Reference Genome NC_045512.2              | (1989) | AG -T ATTC ACTG AGACT CAT TGATGCT ATGATG TTCACA TCTGAT TTGGCTA CTAACAATCTAG TTGTAAT GCCTACAT             |      |      |      |      |      |      |      |      |      |
| Alternaria brassicicola endornavirus isolate 1 NC... | (1625) | ATACA -T GACAC AGA AA CTA TGATGCA ATCAAG C ---- AAAAG CGTTGT CAGCGC AGACAGG AGGGAGGCC GTTGCCAGA          |      |      |      |      |      |      |      |      |      |
|                                                      |        | Section 27                                                                                               |      |      |      |      |      |      |      |      |      |
|                                                      |        | (2081)                                                                                                   | 2081 | 2090 | 2100 | 2110 | 2120 | 2130 | 2140 | 2150 | 2160 |
| SARS-CoV-2 Reference Genome NC_045512.2              | (2068) | TACAGGTGGT GTTGTTCA GTTGA CT -- TCGCAGTGGCT AACT ---- AACATCTT TGGCACT GTT TATGAAA AACTCA --             |      |      |      |      |      |      |      |      |      |
| Alternaria brassicicola endornavirus isolate 1 NC... | (1700) | ATAAAA TCAGGCA ---- AGCAGC CTAT TGTGTC CCACTCGAAAGCGC AAAAAT -TG TGGCATGTGT -T ---GAC AAAGTCGGG          |      |      |      |      |      |      |      |      |      |
|                                                      |        | Section 28                                                                                               |      |      |      |      |      |      |      |      |      |
|                                                      |        | (2161)                                                                                                   | 2161 | 2170 | 2180 | 2190 | 2200 | 2210 | 2220 | 2230 | 2240 |
| SARS-CoV-2 Reference Genome NC_045512.2              | (2139) | AACC CGTCC --TT GATT GCTTGA AGAGAAG FTTTAA GGAAGGTGTA GAGTTTCT TAGAGACGGT TGGGAAATT GTTAAAT              |      |      |      |      |      |      |      |      |      |
| Alternaria brassicicola endornavirus isolate 1 NC... | (1771) | AACC TC TTTTGGC GTGAGCAT C GACACACTT TTTTATATGAAGCCT GAGGACATG -GTGGCGTCAT GAAAGGC GCACAAAC              |      |      |      |      |      |      |      |      |      |

SARS-CoV-2 & Alternaria brassicicola endornavirus.apr

|                                                                                                 |        |        |                       |          |                                       |         |                 |                   |                 |                         |                    |              |                |               |            |           |           |            |       |      |         |      |
|-------------------------------------------------------------------------------------------------|--------|--------|-----------------------|----------|---------------------------------------|---------|-----------------|-------------------|-----------------|-------------------------|--------------------|--------------|----------------|---------------|------------|-----------|-----------|------------|-------|------|---------|------|
|                                                                                                 |        |        |                       |          |                                       |         |                 |                   |                 |                         | Section 29         |              |                |               |            |           |           |            |       |      |         |      |
| SARS-CoV-2 Reference Genome NC_045512.2<br>Alternaria brassicicola endornavirus isolate 1 NC... | (2241) | 2241   | 2250                  | 2260     | 2270                                  | 2280    | 2290            | 2300              | 2310            | 2320                    |                    |              |                |               |            |           |           |            |       |      |         |      |
|                                                                                                 | (2217) | T      | TATCTCAACCTGTGCTTGTGA | AAT      | TGTCGGTGGACAAATTGTCACCTGTGCAAAGGAAATT | AAG     | GAGAGTGTTCAGACA |                   |                 |                         |                    |              |                |               |            |           |           |            |       |      |         |      |
|                                                                                                 | (1850) | A      | TAAATTTACGGCCTGCATGC  | --AAT    | AAATAGTTTCCTCCGACAT                   | TCA     | TGTATGAAA       | CAAGTGGAAAG       | TTGGCTTTCAACGAA |                         |                    |              |                |               |            |           |           |            |       |      |         |      |
|                                                                                                 |        |        |                       |          |                                       |         |                 |                   |                 |                         | Section 30         |              |                |               |            |           |           |            |       |      |         |      |
| SARS-CoV-2 Reference Genome NC_045512.2<br>Alternaria brassicicola endornavirus isolate 1 NC... | (2321) | 2321   | 2330                  | 2340     | 2350                                  | 2360    | 2370            | 2380              | 2390            | 2400                    |                    |              |                |               |            |           |           |            |       |      |         |      |
|                                                                                                 | (2297) | TT     | CTTTAA                | GCTTG    | TAAAT                                 | AAATTTT | TGGCTTTTG       | TGTGCTGACTCTATCAT | TATTG           | GTGGAGCTAAACTTAAAGCCTTG | GAA                |              |                |               |            |           |           |            |       |      |         |      |
|                                                                                                 | (1928) | GG     | CCAATG                | GC       | GGA                                   | TAA     | GC              | AAAGGCACA--TTT    | TGA-AATG        | GT                      | CACCAATGGTTTGCA    | CGGC         | GCTTAC         | CACAGCTCCGCGC |            |           |           |            |       |      |         |      |
|                                                                                                 |        |        |                       |          |                                       |         |                 |                   |                 |                         | Section 31         |              |                |               |            |           |           |            |       |      |         |      |
| SARS-CoV-2 Reference Genome NC_045512.2<br>Alternaria brassicicola endornavirus isolate 1 NC... | (2401) | 2401   | 2410                  | 2420     | 2430                                  | 2440    | 2450            | 2460              | 2470            | 2480                    |                    |              |                |               |            |           |           |            |       |      |         |      |
|                                                                                                 | (2377) | TT     | TAGGTG                | AAACAT   | TTTG                                  | TAC     | ACGC            | ACTCAAAG          | GGA             | TGTGTACA                | GAAAGTGTGTTAAATCCA | GAGA         | GAAACTG        | GCC           | TAC        | -TC       |           |            |       |      |         |      |
|                                                                                                 | (2005) | AG     | T                     | CATGA    | AAAC                                  | G       | TGGT            | TG                | ACT-AC          | G                       | CCCTGTTT           | TGTGGGC      | GAGG           | GTTT          | TGGCTTGTAC | GT        | GAGGAA    | CGAAGGGTAC | ATG   |      |         |      |
|                                                                                                 |        |        |                       |          |                                       |         |                 |                   |                 |                         | Section 32         |              |                |               |            |           |           |            |       |      |         |      |
| SARS-CoV-2 Reference Genome NC_045512.2<br>Alternaria brassicicola endornavirus isolate 1 NC... | (2481) | 2481   | 2490                  | 2500     | 2510                                  | 2520    | 2530            | 2540              | 2550            | 2560                    |                    |              |                |               |            |           |           |            |       |      |         |      |
|                                                                                                 | (2456) | AT     | G                     | CCCTCTAA | AAGC                                  | CCCA    | AAAGAA          | ATTA              | TCTTCTTAGAG     | GGA                     | GAAACACTTCCACAGAA  | GTGT--TA     | AACAGAGGAA     | GTT           |            |           |           |            |       |      |         |      |
|                                                                                                 | (2084) | GGG    | T                     | C        | T                                     | CAC     | A               | TGCT              | CC              | TC                      | AA                 | GATCATGAGGGT | GCCATAC        | GGA           | ACTATCAT   | TG        | CAACACATG | GT         | CAGGC | ACTG | CCCTTTG | GTT  |
|                                                                                                 |        |        |                       |          |                                       |         |                 |                   |                 |                         | Section 33         |              |                |               |            |           |           |            |       |      |         |      |
| SARS-CoV-2 Reference Genome NC_045512.2<br>Alternaria brassicicola endornavirus isolate 1 NC... | (2561) | 2561   | 2570                  | 2580     | 2590                                  | 2600    | 2610            | 2620              | 2630            | 2640                    |                    |              |                |               |            |           |           |            |       |      |         |      |
|                                                                                                 | (2534) | G      | T                     | CTTG     | AAAA                                  | CTGGT   | GATTTA          | CAACCA            | TTAGAACAA       | CC                      | TACTAGTGAAG        | CTGTTGAAG    | CTCCATTGGTTGGT | ---           | ACACC      |           |           |            |       |      |         |      |
|                                                                                                 | (2164) | G      | AGGGG                 | CAAC     | CC--A                                 | GATGAG  | CA              | GATCTATA          | ACATCC          | CA                      | AATTATAGATC        | CGGAAAAGC    | CGGTGAC        | GT            | TGCTTTGG   | AAACA     |           |            |       |      |         |      |
|                                                                                                 |        |        |                       |          |                                       |         |                 |                   |                 |                         | Section 34         |              |                |               |            |           |           |            |       |      |         |      |
| SARS-CoV-2 Reference Genome NC_045512.2<br>Alternaria brassicicola endornavirus isolate 1 NC... | (2641) | 2641   | 2650                  | 2660     | 2670                                  | 2680    | 2690            | 2700              | 2710            | 2720                    |                    |              |                |               |            |           |           |            |       |      |         |      |
|                                                                                                 | (2611) | AG--TT | TGT-AT                | T-AACGG  | GCTTATGT                              | TGCT--- | CGA             | AATCA             | AAGACA          | CAGAAAAGT               | ACTGTGCCCT         | TG           | ACCTAATAT      | T             |            |           |           |            |       |      |         |      |
|                                                                                                 | (2242) | A      | CCGTT                 | CACC     | ATCG                                  | AACGG   | CTATGC          | GTCA              | ACTCTA          | CGA                     | TGCTCAGCATG        | CTA          | AAAAGG         | CAGAC         | TGAGTA     | TG        | AC        | GAA        | AT-GT |      |         |      |
|                                                                                                 |        |        |                       |          |                                       |         |                 |                   |                 |                         | Section 35         |              |                |               |            |           |           |            |       |      |         |      |
| SARS-CoV-2 Reference Genome NC_045512.2<br>Alternaria brassicicola endornavirus isolate 1 NC... | (2721) | 2721   | 2730                  | 2740     | 2750                                  | 2760    | 2770            | 2780              | 2790            | 2800                    |                    |              |                |               |            |           |           |            |       |      |         |      |
|                                                                                                 | (2683) | G      | ATGGTA                | ACA      | AAAC                                  | AATACC  | TTC             | AC                | ACTCA           | AAG                     | GC                 | GGTGCAC      | CAACA          | AAG           | TTAC       | TTTTGGTGA | TGACA     | CTGT       | GATA  | -GAA |         |      |
|                                                                                                 | (2321) | A      | ATTGGG                | AC       | CAAC                                  | TATCTA  | TAT             | AC                | G--C            | AC                      | GTG                | GGT          | TGCG           | CCATC         | AAG        | TTAC      | ACCAG     | CCCA       | AC    | AGG  | CCGG    | GTCA |

SARS-CoV-2 & Alternaria brassicicola endornavirus.apr

|                                                                                                 |        |            |      |      |      |      |      |      |      |      |   |
|-------------------------------------------------------------------------------------------------|--------|------------|------|------|------|------|------|------|------|------|---|
|                                                                                                 |        | Section 36 |      |      |      |      |      |      |      |      |   |
| SARS-CoV-2 Reference Genome NC_045512.2<br>Alternaria brassicicola endornavirus isolate 1 NC... | (2801) | 2801       | 2810 | 2820 | 2830 | 2840 | 2850 | 2860 | 2870 | 2880 |   |
|                                                                                                 | (2762) | G          | T    | G    | C    | A    | A    | G    | G    | T    | T |
|                                                                                                 | (2398) | A          | T    | T    | A    | A    | C    | A    | T    | G    | A |
|                                                                                                 |        | Section 37 |      |      |      |      |      |      |      |      |   |
| SARS-CoV-2 Reference Genome NC_045512.2<br>Alternaria brassicicola endornavirus isolate 1 NC... | (2881) | 2881       | 2890 | 2900 | 2910 | 2920 | 2930 | 2940 | 2950 | 2960 |   |
|                                                                                                 | (2838) | C          | T    | G    | C    | C    | T    | A    | T    | A    | C |
|                                                                                                 | (2476) | C          | A    | G    | C    | C    | A    | T    | T    | G    | A |
|                                                                                                 |        | Section 38 |      |      |      |      |      |      |      |      |   |
| SARS-CoV-2 Reference Genome NC_045512.2<br>Alternaria brassicicola endornavirus isolate 1 NC... | (2961) | 2961       | 2970 | 2980 | 2990 | 3000 | 3010 | 3020 | 3030 | 3040 |   |
|                                                                                                 | (2907) | A          | A    | A    | C    | T    | T    | T    | G    | C    | A |
|                                                                                                 | (2555) | A          | T    | G    | C    | T    | A    | A    | T    | G    | G |
|                                                                                                 |        | Section 39 |      |      |      |      |      |      |      |      |   |
| SARS-CoV-2 Reference Genome NC_045512.2<br>Alternaria brassicicola endornavirus isolate 1 NC... | (3041) | 3041       | 3050 | 3060 | 3070 | 3080 | 3090 | 3100 | 3110 | 3120 |   |
|                                                                                                 | (2979) | A          | C    | T    | T    | -    | -    | A    | T    | T    | T |
|                                                                                                 | (2634) | T          | A    | G    | A    | G    | A    | T    | A    | A    | G |
|                                                                                                 |        | Section 40 |      |      |      |      |      |      |      |      |   |
| SARS-CoV-2 Reference Genome NC_045512.2<br>Alternaria brassicicola endornavirus isolate 1 NC... | (3121) | 3121       | 3130 | 3140 | 3150 | 3160 | 3170 | 3180 | 3190 | 3200 |   |
|                                                                                                 | (3048) | A          | T    | G    | A    | G    | A    | T    | G    | A    | A |
|                                                                                                 | (2714) | A          | T    | G    | A    | G    | A    | T    | G    | A    | A |
|                                                                                                 |        | Section 41 |      |      |      |      |      |      |      |      |   |
| SARS-CoV-2 Reference Genome NC_045512.2<br>Alternaria brassicicola endornavirus isolate 1 NC... | (3201) | 3201       | 3210 | 3220 | 3230 | 3240 | 3250 | 3260 | 3270 | 3280 |   |
|                                                                                                 | (3121) | A          | G    | -    | A    | T    | G    | A    | -    | T    | T |
|                                                                                                 | (2793) | A          | C    | T    | C    | A    | C    | C    | A    | G    | A |
|                                                                                                 |        | Section 42 |      |      |      |      |      |      |      |      |   |
| SARS-CoV-2 Reference Genome NC_045512.2<br>Alternaria brassicicola endornavirus isolate 1 NC... | (3281) | 3281       | 3290 | 3300 | 3310 | 3320 | 3330 | 3340 | 3350 | 3360 |   |
|                                                                                                 | (3198) | A          | T    | T    | G    | G    | T    | T    | A    | G    | T |
|                                                                                                 | (2870) | C          | A    | A    | G    | C    | G    | A    | C    | A    | G |

SARS-CoV-2 & Alternaria brassicicola endornavirus.apr

[illegible]

SARS-CoV-2 & Alternaria brassicicola endornavirus.apr

|                                                                                                 |        |                                                                    |                   |               |                |               |              |              |              |               |                              |
|-------------------------------------------------------------------------------------------------|--------|--------------------------------------------------------------------|-------------------|---------------|----------------|---------------|--------------|--------------|--------------|---------------|------------------------------|
|                                                                                                 |        | Section 50                                                         |                   |               |                |               |              |              |              |               |                              |
| SARS-CoV-2 Reference Genome NC_045512.2<br>Alternaria brassicicola endornavirus isolate 1 NC... | (3921) | 3921                                                               | 3930              | 3940          | 3950           | 3960          | 3970         | 3980         | 3990         | 4000          |                              |
|                                                                                                 | (3803) | AAA-AAATCTCTATGACAAACCTTGT-TCAAAGCTTTTGGAAATGAAGAGTGA              | AAAAG-CAAGTTGAACA | AA--AAGA      | TGCGCT         |               |              |              |              |               |                              |
|                                                                                                 | (3469) | CAACAAATACACGGCGTTCACTGTCTGAAATATGTGGACACGCCCGATGATGGCACTTGTGTTTCA | CGGC              | GCTCG         | AG             |               |              |              |              |               |                              |
|                                                                                                 |        | Section 51                                                         |                   |               |                |               |              |              |              |               |                              |
| SARS-CoV-2 Reference Genome NC_045512.2<br>Alternaria brassicicola endornavirus isolate 1 NC... | (4001) | 4001                                                               | 4010              | 4020          | 4030           | 4040          | 4050         | 4060         | 4070         | 4080          |                              |
|                                                                                                 | (3878) | GAGATT-CC                                                          | TAAA-AGG          | AAGTTAA       | GCCATT-TATAAC  | TGAAAGTAA     | ACCTTCAGTTGA | ACAGAGA      | AAACAA       | GATGATAA      |                              |
|                                                                                                 | (3548) | CAGCTGCA                                                           | TACCCAAGC         | AAGCTAA       | ACATGGCCGACCTT | CAAAAG--GA    | ---TAGC--C   | ACAGAGA      | CGATTG       | GTGAGCG       |                              |
|                                                                                                 |        | Section 52                                                         |                   |               |                |               |              |              |              |               |                              |
| SARS-CoV-2 Reference Genome NC_045512.2<br>Alternaria brassicicola endornavirus isolate 1 NC... | (4081) | 4081                                                               | 4090              | 4100          | 4110           | 4120          | 4130         | 4140         | 4150         | 4160          |                              |
|                                                                                                 | (3955) | GAAAATCAAA                                                         | GCTGTGTT          | GAAGAAGTTA    | CAACAACTC      | TGGAAGA       | AACTAAGTT    | CCCTCACAGAAA | AACTT        | GTACTTTATA    |                              |
|                                                                                                 | (3621) | GCAACGACTTT                                                        | GGGTATGTT         | CTGCGTAAGC    | CAA--GGAG      | TGAACCTTA     | CTCGTGGT     | TGGAACA      | AGTACGT      | TCCGATATTTATC |                              |
|                                                                                                 |        | Section 53                                                         |                   |               |                |               |              |              |              |               |                              |
| SARS-CoV-2 Reference Genome NC_045512.2<br>Alternaria brassicicola endornavirus isolate 1 NC... | (4161) | 4161                                                               | 4170              | 4180          | 4190           | 4200          | 4210         | 4220         | 4230         | 4240          |                              |
|                                                                                                 | (4035) | T---TGACA                                                          | TTAA              | TGGCAATCTTCA  | TCCA           | GAT-TCTGCA    | CAC          | TCTTGTTAGTGA | -CATT        | GACATCACTT    | TCTTAAAGAAAG                 |
|                                                                                                 | (3699) | AAGGC                                                              | GACA              | CGAAGTCA      | AA             | CAATACGGC     | GCTATAGTT    | CAC          | ATGACCACTATA | TCCG-GCGA     | AGTGCA                       |
|                                                                                                 |        | Section 54                                                         |                   |               |                |               |              |              |              |               |                              |
| SARS-CoV-2 Reference Genome NC_045512.2<br>Alternaria brassicicola endornavirus isolate 1 NC... | (4241) | 4241                                                               | 4250              | 4260          | 4270           | 4280          | 4290         | 4300         | 4310         | 4320          |                              |
|                                                                                                 | (4110) | ATGCTC                                                             | CATATAT           | AGTGGTGAT     | TGTGTTCA       | AAGAGGGTGTTTT | ACTGCTGT     | GTTATAC      | TACTAAAA     | AAGG-CTG      | -GTG                         |
|                                                                                                 | (3777) | G                                                                  | TGAAG             | CGCGTAT       | CA             | TGAGTGT       | TAA          | TGCAGACG-GCG | ACCGAGATT    | TAGATAG       | ACGCAACATA                   |
|                                                                                                 |        | Section 55                                                         |                   |               |                |               |              |              |              |               |                              |
| SARS-CoV-2 Reference Genome NC_045512.2<br>Alternaria brassicicola endornavirus isolate 1 NC... | (4321) | 4321                                                               | 4330              | 4340          | 4350           | 4360          | 4370         | 4380         | 4390         | 4400          |                              |
|                                                                                                 | (4188) | GC                                                                 | ACTACTG           | AAATGCT       | AGCG           | AAAGC--TTTGAG | GA-AAA       | GTG          | CCAA         | CAGACAA       | TTATATAACCACTTA              |
|                                                                                                 | (3856) | AG                                                                 | ACCGAAC           | AGGCAA-       | AGAA           | ATC           | ACGAAATG     | GACGTC       | GTGTCTAGAG   | --AA          | GAAATTCGTGACCAATCTGTTGGCCGAA |
|                                                                                                 |        | Section 56                                                         |                   |               |                |               |              |              |              |               |                              |
| SARS-CoV-2 Reference Genome NC_045512.2<br>Alternaria brassicicola endornavirus isolate 1 NC... | (4401) | 4401                                                               | 4410              | 4420          | 4430           | 4440          | 4450         | 4460         | 4470         | 4480          |                              |
|                                                                                                 | (4265) | TTA                                                                | AATGGT            | TACACTGTAGAGG | AGGCA-AA       | GACAG         | TGCTTAA      | AAA--AGTGT   | AAAA         | AGTGCCTTT     | TACATTCTACCATCT              |
|                                                                                                 | (3933) | AAC                                                                | AATGGC            | TATCAACGTTCCC | AGCCTC         | AA            | CAGAG        | CTAAAC       | AGGCTGAT     | GAGAACT       | AAATTAGTTAATGGGATGCTGGAA     |



SARS-CoV-2 & Alternaria brassicicola endornavirus.apr

|                                                      |        |            |          |         |          |          |         |          |           |            |          |
|------------------------------------------------------|--------|------------|----------|---------|----------|----------|---------|----------|-----------|------------|----------|
|                                                      |        | Section 57 |          |         |          |          |         |          |           |            |          |
| SARS-CoV-2 Reference Genome NC_045512.2              | (4481) | 4481       | 4490     | 4500    | 4510     | 4520     | 4530    | 4540     | 4550      | 4560       |          |
|                                                      | (4340) | ATTATC     | TCTAATGA | GAA-GCA | AGAAATTC | TTGGAACT | TTCT--T | GGAATTT  | GCGAGAAAT | GCTTGCACAT | GCAAGAA  |
| Alternaria brassicicola endornavirus isolate 1 NC... | (4013) | GCGGAA     | TCAGAGAC | GATC    | GATTCC   | ATTC     | AACGAA  | TGGTAT   | GAACTCGA  | CCAA       | GCGGTTCA |
|                                                      |        | Section 58 |          |         |          |          |         |          |           |            |          |
| SARS-CoV-2 Reference Genome NC_045512.2              | (4561) | 4561       | 4570     | 4580    | 4590     | 4600     | 4610    | 4620     | 4630      | 4640       |          |
|                                                      | (4417) | AACAC      | GCAA---- | ATTAA   | TG-CCT   | GTCTGTGT | GGA     | AACTAAAG | CCATAGT   | TTCACT     | ATACAG   |
| Alternaria brassicicola endornavirus isolate 1 NC... | (4093) | GAAAG      | GCCTGCCC | ATT     | ACATAAC  | G        | GACAACA | GGA      | TC        | CGATG      | AATGG    |
|                                                      |        | Section 59 |          |         |          |          |         |          |           |            |          |
| SARS-CoV-2 Reference Genome NC_045512.2              | (4641) | 4641       | 4650     | 4660    | 4670     | 4680     | 4690    | 4700     | 4710      | 4720       |          |
|                                                      | (4492) | TAAAA      | TACAA    | AGAGG   | GTGTG    | TTTGA    | TTATG   | GTGTG    | TAGAT     | TTTACT     | TTTAC    |
| Alternaria brassicicola endornavirus isolate 1 NC... | (4173) | GCAGT      | TGTG     | ACGAC   | GT       | CAT      | GT      | CAT      | TTATG     | AGC        | CCG      |
|                                                      |        | Section 60 |          |         |          |          |         |          |           |            |          |
| SARS-CoV-2 Reference Genome NC_045512.2              | (4721) | 4721       | 4730     | 4740    | 4750     | 4760     | 4770    | 4780     | 4790      | 4800       |          |
|                                                      | (4572) | AC         | ACACT    | TAA     | CGATC    | TAAAT    | GAAACT  | CT       | TGTTA     | CAATG      | CCACT    |
| Alternaria brassicicola endornavirus isolate 1 NC... | (4248) | CG         | ACA      | AA      | TGC      | CGCT     | -TACAT  | -----    | CG        | TGCCA      | -GATG    |
|                                                      |        | Section 61 |          |         |          |          |         |          |           |            |          |
| SARS-CoV-2 Reference Genome NC_045512.2              | (4801) | 4801       | 4810     | 4820    | 4830     | 4840     | 4850    | 4860     | 4870      | 4880       |          |
|                                                      | (4652) | GCT        | CGGT     | ATATG   | AGATC    | TC       | TCAA    | AGTG     | CCA       | GCT        | ACAGTTT  |
| Alternaria brassicicola endornavirus isolate 1 NC... | (4318) | GAA        | CAAC     | ACA     | AAAA     | ACG      | TC      | AGCG     | AGAA      | CCA        | --AAC    |
|                                                      |        | Section 62 |          |         |          |          |         |          |           |            |          |
| SARS-CoV-2 Reference Genome NC_045512.2              | (4881) | 4881       | 4890     | 4900    | 4910     | 4920     | 4930    | 4940     | 4950      | 4960       |          |
|                                                      | (4732) | TCTTAC     | TTCTT    | CTTCT   | AA       | AACA     | CC      | TGAAGA   | ACA       | TTTTATT    | GAA      |
| Alternaria brassicicola endornavirus isolate 1 NC... | (4392) | CA---      | G        | TCG     | TGCT     | GGG      | AA      | TGGC     | CC        | GTGCCA     | TAG---   |
|                                                      |        | Section 63 |          |         |          |          |         |          |           |            |          |
| SARS-CoV-2 Reference Genome NC_045512.2              | (4961) | 4961       | 4970     | 4980    | 4990     | 5000     | 5010    | 5020     | 5030      | 5040       |          |
|                                                      | (4811) | TATT       | CTGGAC   | AAT     | CTAC     | ACA      | ACT     | TAG      | GTAT      | GAAT       | TTCT     |
| Alternaria brassicicola endornavirus isolate 1 NC... | (4465) | GAAA       | CGCCA    | AAT     | TGGA     | AA       | ACA     | TTT      | GTG       | ACAT       | TGC      |

SARS-CoV-2 & Alternaria brassicicola endornavirus.apr

|                                                      |        |            |      |       |       |       |       |       |      |       |         |
|------------------------------------------------------|--------|------------|------|-------|-------|-------|-------|-------|------|-------|---------|
|                                                      |        | Section 64 |      |       |       |       |       |       |      |       |         |
|                                                      |        | (5041)     | 5041 | 5050  | 5060  | 5070  | 5080  | 5090  | 5100 | 5110  | 5120    |
| SARS-CoV-2 Reference Genome NC_045512.2              | (4891) | C-ACAT     | TCC  | ACCTA | GAT   | GGT   | GAA   | GT    | TAT  | CACC  | TTTGAC  |
| Alternaria brassicicola endornavirus isolate 1 NC... | (4542) | CTATGC     | TGG  | ATGAC | GAT   | TTC   | GAC   | GT    | CGAC | GAA   | TTTGAC  |
|                                                      |        | Section 65 |      |       |       |       |       |       |      |       |         |
|                                                      |        | (5121)     | 5121 | 5130  | 5140  | 5150  | 5160  | 5170  | 5180 | 5190  | 5200    |
| SARS-CoV-2 Reference Genome NC_045512.2              | (4968) | TTAA       | GGT  | GTTT  | AC    | AAC   | A--   | GT    | AG   | CA    | CAACATT |
| Alternaria brassicicola endornavirus isolate 1 NC... | (4622) | CAAA       | TCAA | AAGA  | AA    | AAC   | GAGG  | CA    | AG   | G     | CGGTGCC |
|                                                      |        | Section 66 |      |       |       |       |       |       |      |       |         |
|                                                      |        | (5201)     | 5201 | 5210  | 5220  | 5230  | 5240  | 5250  | 5260 | 5270  | 5280    |
| SARS-CoV-2 Reference Genome NC_045512.2              | (5039) | CAAC       | AGTT | TGG   | TCCAA | CT    | TAT   | TGGAT | GGA  | GCT   | GATG    |
| Alternaria brassicicola endornavirus isolate 1 NC... | (4702) | CAAT       | AACG | TGG   | GTT   | CG    | CT    | G     | ACG  | TGGAT | ATG     |
|                                                      |        | Section 67 |      |       |       |       |       |       |      |       |         |
|                                                      |        | (5281)     | 5281 | 5290  | 5300  | 5310  | 5320  | 5330  | 5340 | 5350  | 5360    |
| SARS-CoV-2 Reference Genome NC_045512.2              | (5117) | TTTTAT     | GTT  | TACCT | AATG  | ATGAC | ACT   | CTAC  | GT   | TGAG  | GGCT    |
| Alternaria brassicicola endornavirus isolate 1 NC... | (4782) | GCGG       | CAAA | TT    | CA    | TGA   | AGAT  | AGTGA | ACT  | GCGG  | CAGCT   |
|                                                      |        | Section 68 |      |       |       |       |       |       |      |       |         |
|                                                      |        | (5361)     | 5361 | 5370  | 5380  | 5390  | 5400  | 5410  | 5420 | 5430  | 5440    |
| SARS-CoV-2 Reference Genome NC_045512.2              | (5197) | TAG        | GT   | ACAT  | GTCA  | GCA   | T     | AAAT  | CACA | CTAA  | AAAG    |
| Alternaria brassicicola endornavirus isolate 1 NC... | (4862) | T--        | GT   | GGG   | CAAC  | GTT   | TA    | AT    | GA   | AG    | TAA     |
|                                                      |        | Section 69 |      |       |       |       |       |       |      |       |         |
|                                                      |        | (5441)     | 5441 | 5450  | 5460  | 5470  | 5480  | 5490  | 5500 | 5510  | 5520    |
| SARS-CoV-2 Reference Genome NC_045512.2              | (5274) | CAG        | A    | TAA   | CACT  | GTCA  | T     | GT    | TAA  | CACT  | CCA     |
| Alternaria brassicicola endornavirus isolate 1 NC... | (4940) | GT         | GGAC | AA    | AAC   | CAGC  | AAT   | TATTT | GAA  | TGG   | TAA     |
|                                                      |        | Section 70 |      |       |       |       |       |       |      |       |         |
|                                                      |        | (5521)     | 5521 | 5530  | 5540  | 5550  | 5560  | 5570  | 5580 | 5590  | 5600    |
| SARS-CoV-2 Reference Genome NC_045512.2              | (5344) | TGCT       | CTA  | CAA   | GAT   | GTCT  | TATTA | A     | CAG  | CA    | AGGG    |
| Alternaria brassicicola endornavirus isolate 1 NC... | (5020) | TTAT       | TGG  | CGC   | GA    | ACAA  | TACCA | AA    | TGG  | CA    | CCAA    |

SARS-CoV-2 & Alternaria brassicicola endornavirus.apr

|                                                      |        |                                                                                            |      |      |      |      |      |      |      |      |      |
|------------------------------------------------------|--------|--------------------------------------------------------------------------------------------|------|------|------|------|------|------|------|------|------|
|                                                      |        | Section 71                                                                                 |      |      |      |      |      |      |      |      |      |
|                                                      |        | (5601)                                                                                     | 5601 | 5610 | 5620 | 5630 | 5640 | 5650 | 5660 | 5670 | 5680 |
| SARS-CoV-2 Reference Genome NC_045512.2              | (5419) | TAAT AAGACAGT AGGTG-AGTTAGGTGATGT---TAGAGAAAC-----AATGAGTTACTTGTTT                         |      |      |      |      |      |      |      |      |      |
| Alternaria brassicicola endornavirus isolate 1 NC... | (5098) | CCAC AAGAAGTCATGTGTAGTGGGATCATGT CACGTGA AAAACGGCCAACTAACCATACGCGCAAA CAGACATAAAAGAGT      |      |      |      |      |      |      |      |      |      |
|                                                      |        | Section 72                                                                                 |      |      |      |      |      |      |      |      |      |
|                                                      |        | (5681)                                                                                     | 5681 | 5690 | 5700 | 5710 | 5720 | 5730 | 5740 | 5750 | 5760 |
| SARS-CoV-2 Reference Genome NC_045512.2              | (5474) | CA-----ACATGCCAA TTTAGATTCTTGCAAAAGAGTCTTGAA CGTGGTGTGTAA AACTTGTG GAC AACAGCAGAC-A        |      |      |      |      |      |      |      |      |      |
| Alternaria brassicicola endornavirus isolate 1 NC... | (5178) | GCAGCGCGTACGAGGCC TT TTGTGTG CAAA CAGACAGACTTG GT CGTGGGCATTCAGCAT T GCCC GACGGTACCA TTGCA |      |      |      |      |      |      |      |      |      |
|                                                      |        | Section 73                                                                                 |      |      |      |      |      |      |      |      |      |
|                                                      |        | (5761)                                                                                     | 5761 | 5770 | 5780 | 5790 | 5800 | 5810 | 5820 | 5830 | 5840 |
| SARS-CoV-2 Reference Genome NC_045512.2              | (5546) | ACCCCTAAGGGTGTAGAAGCTGTTATGTACATGGGCACACTTCTTTATGAACAA TTTAAGAAAGG TGTTCAGATACCTTG         |      |      |      |      |      |      |      |      |      |
| Alternaria brassicicola endornavirus isolate 1 NC... | (5258) | ACAGCTGCTCGCC TCGACAA TGGGCCAGTGCGGGTTATAGGGTC-TCAGGACAA CATAGGGTAC-TGCTTG GTGATGGCC       |      |      |      |      |      |      |      |      |      |
|                                                      |        | Section 74                                                                                 |      |      |      |      |      |      |      |      |      |
|                                                      |        | (5841)                                                                                     | 5841 | 5850 | 5860 | 5870 | 5880 | 5890 | 5900 | 5910 | 5920 |
| SARS-CoV-2 Reference Genome NC_045512.2              | (5626) | TACGTGTGGTAAACAGCTACAAAA TATCTAGTACAA CAGGAGTCA ACC TTTTGT TTATGATGTCAGCA ACCACCTGCTCAGT   |      |      |      |      |      |      |      |      |      |
| Alternaria brassicicola endornavirus isolate 1 NC... | (5336) | TGCAAC--TTCGAC TCCGGGAGGGGT TGTGTA ACTGA AGGAATTAA ACCAGATG GTCAAGG GGGCAA AAGCGTTCGTCGGC  |      |      |      |      |      |      |      |      |      |
|                                                      |        | Section 75                                                                                 |      |      |      |      |      |      |      |      |      |
|                                                      |        | (5921)                                                                                     | 5921 | 5930 | 5940 | 5950 | 5960 | 5970 | 5980 | 5990 | 6000 |
| SARS-CoV-2 Reference Genome NC_045512.2              | (5706) | ATGAACCTTAAGCATGGTACATTTACTTGTGCTAGTGAGTACACTGGTAA TTA CAGTGTGGTCACTATATAACATATAACT        |      |      |      |      |      |      |      |      |      |
| Alternaria brassicicola endornavirus isolate 1 NC... | (5414) | GTGCCTGGAGGC--GGGAAACAAGGGGTGCGCAAAATCGCTACCCC AAGGC-ACGATAGTGACGAAACAAGCCGGCAT            |      |      |      |      |      |      |      |      |      |
|                                                      |        | Section 76                                                                                 |      |      |      |      |      |      |      |      |      |
|                                                      |        | (6001)                                                                                     | 6001 | 6010 | 6020 | 6030 | 6040 | 6050 | 6060 | 6070 | 6080 |
| SARS-CoV-2 Reference Genome NC_045512.2              | (5786) | TCTAAAGAAACTTTGTATTGCATAGACGGTGCTTTACTTACAAAGTCTCAGAAATACAAAGGTCTATTACGGATGTTTT            |      |      |      |      |      |      |      |      |      |
| Alternaria brassicicola endornavirus isolate 1 NC... | (5491) | GT TAAAG--ACC TT---TCGAGCCGAGGGACGTGATGCTGTCA CCCGAGGCC AATTGATAGCA CGCAAAACACCCACCGA      |      |      |      |      |      |      |      |      |      |
|                                                      |        | Section 77                                                                                 |      |      |      |      |      |      |      |      |      |
|                                                      |        | (6081)                                                                                     | 6081 | 6090 | 6100 | 6110 | 6120 | 6130 | 6140 | 6150 | 6160 |
| SARS-CoV-2 Reference Genome NC_045512.2              | (5866) | CTACAAAGAAAACAGTTACACAACAA CATAAACCA GTTACTTATAAATTGGATGGT GTTGT TTTGTACAGAAATTGACC        |      |      |      |      |      |      |      |      |      |
| Alternaria brassicicola endornavirus isolate 1 NC... | (5566) | CTGCGTC-A TTCTAGACGAAGCGGGCCTGTGCAAC TATACTGATCTTTGGCCAATGGT TGGGAAGGTCA ACCAAC TGATC      |      |      |      |      |      |      |      |      |      |

SARS-CoV-2 & Alternaria brassicicola endornavirus.apr

|                                                      |        |            |      |          |      |       |         |       |        |        |         |
|------------------------------------------------------|--------|------------|------|----------|------|-------|---------|-------|--------|--------|---------|
|                                                      |        | Section 78 |      |          |      |       |         |       |        |        |         |
|                                                      |        | (6161)     | 6161 | 6170     | 6180 | 6190  | 6200    | 6210  | 6220   | 6230   | 6240    |
| SARS-CoV-2 Reference Genome NC_045512.2              | (5946) | C          | TAA  | GTTGGACA | AT   | TATT  | ATA     | AGAA  | AGACA  | AT     | TCTTA   |
| Alternaria brassicicola endornavirus isolate 1 NC... | (5645) | A          | TAA  | CAGCA--G | AT   | ATAAA | CC      | AA    | CAACA  | CA     | TCAT--T |
|                                                      |        | Section 79 |      |          |      |       |         |       |        |        |         |
|                                                      |        | (6241)     | 6241 | 6250     | 6260 | 6270  | 6280    | 6290  | 6300   | 6310   | 6320    |
| SARS-CoV-2 Reference Genome NC_045512.2              | (6076) | C          | CA   | AACG     | C    | AA    | GCTT    | -C    | GATA   | AT     | TTTAA   |
| Alternaria brassicicola endornavirus isolate 1 NC... | (5708) | C          | CA   | A        | CTT  | C     | GT      | G     | TTAA   | G      | TGGAG   |
|                                                      |        | Section 80 |      |          |      |       |         |       |        |        |         |
|                                                      |        | (6321)     | 6321 | 6330     | 6340 | 6350  | 6360    | 6370  | 6380   | 6390   | 6400    |
| SARS-CoV-2 Reference Genome NC_045512.2              | (6105) | A          | TAA  | GAA-     | AC   | CTG   | C       | TTCAA | GAGAG  | CTT    | AA      |
| Alternaria brassicicola endornavirus isolate 1 NC... | (5784) | A          | AT   | G        | CTG  | A     | AAC     | GA    | TTCAA  | CCC    | GAGG-   |
|                                                      |        | Section 81 |      |          |      |       |         |       |        |        |         |
|                                                      |        | (6401)     | 6401 | 6410     | 6420 | 6430  | 6440    | 6450  | 6460   | 6470   | 6480    |
| SARS-CoV-2 Reference Genome NC_045512.2              | (6180) | A          | T    | AAAC     | AC-- | TAC   | AC      | ACC   | CTCTTT | TAA    | G       |
| Alternaria brassicicola endornavirus isolate 1 NC... | (5862) | C          | C    | AAAC     | GAGT | TGA   | A       | ACC   | ---AGC | TAA    | AA      |
|                                                      |        | Section 82 |      |          |      |       |         |       |        |        |         |
|                                                      |        | (6481)     | 6481 | 6490     | 6500 | 6510  | 6520    | 6530  | 6540   | 6550   | 6560    |
| SARS-CoV-2 Reference Genome NC_045512.2              | (6255) | C          | A    | ACTAA    | TAA  | G     | CCACGT  | ATAA  | A      | CA     | AA      |
| Alternaria brassicicola endornavirus isolate 1 NC... | (5939) | A          | AG   | CTAA     | A    | CT    | GAGGAAG | ATAA  | C      | CA     | AT      |
|                                                      |        | Section 83 |      |          |      |       |         |       |        |        |         |
|                                                      |        | (6561)     | 6561 | 6570     | 6580 | 6590  | 6600    | 6610  | 6620   | 6630   | 6640    |
| SARS-CoV-2 Reference Genome NC_045512.2              | (6329) | T          | C    | AAA      | TT   | CGT   | TT      | GATGT | AC     | T      | G       |
| Alternaria brassicicola endornavirus isolate 1 NC... | (6018) | G          | G    | GTG      | TT   | CGT   | G-      | ACAAA | AT     | T      | C       |
|                                                      |        | Section 84 |      |          |      |       |         |       |        |        |         |
|                                                      |        | (6641)     | 6641 | 6650     | 6660 | 6670  | 6680    | 6690  | 6700   | 6710   | 6720    |
| SARS-CoV-2 Reference Genome NC_045512.2              | (6406) | C          | T    | C        | TGAA | GAAG  | TAGT    | G     | AA     | AAT    | CCTAC   |
| Alternaria brassicicola endornavirus isolate 1 NC... | (6093) | C          | --   | TGAA     | TGCA | TAGT  | T       | GTG   | A      | CCGGGC | CA      |

SARS-CoV-2 & Alternaria brassicicola endornavirus.apr

|                                                                                                 |        |              |              |             |               |             |            |            |           |            |                |
|-------------------------------------------------------------------------------------------------|--------|--------------|--------------|-------------|---------------|-------------|------------|------------|-----------|------------|----------------|
|                                                                                                 |        | Section 85   |              |             |               |             |            |            |           |            |                |
| SARS-CoV-2 Reference Genome NC_045512.2<br>Alternaria brassicicola endornavirus isolate 1 NC... | (6721) | 6721         | 6730         | 6740        | 6750          | 6760        | 6770       | 6780       | 6790      | 6800       |                |
|                                                                                                 | (6483) | GAGACATTAT   | TACTTAAAC    | CAGCAA-AT   | AATAGTTTAA-AA | TTA-----CAG | AAGAGGT    | TGGCCACA   | CAGATCT   | TAAATGGC   |                |
|                                                                                                 | (6171) | CAGGGTCCGT   | CAGTAGAC     | TGGCTTTG    | AAAGATTG      | AACTTA      | CCCGGGCC   | AAATAG     | TGTCAT    | AATCAAACT  | TGGAGCA        |
|                                                                                                 |        | Section 86   |              |             |               |             |            |            |           |            |                |
| SARS-CoV-2 Reference Genome NC_045512.2<br>Alternaria brassicicola endornavirus isolate 1 NC... | (6801) | 6801         | 6810         | 6820        | 6830          | 6840        | 6850       | 6860       | 6870      | 6880       |                |
|                                                                                                 | (6556) | TGCTTATGT-AG | ACAATTCT     | AGTCTTACT   | ATTAGAAACCT   | AATGAATT    | TATCTAGAGT | --ATT      | AGGTTT    | TGAAAA     | CCCTT          |
|                                                                                                 | (6251) | AAAAATCACATG | GGCCATACA    | AGGGCTGCT   | ACGAGCAT      | TGGGACG     | AGTGGCG    | CAACACAGCT | ACCAGG    | CCTTAAA    | GCGCAT         |
|                                                                                                 |        | Section 87   |              |             |               |             |            |            |           |            |                |
| SARS-CoV-2 Reference Genome NC_045512.2<br>Alternaria brassicicola endornavirus isolate 1 NC... | (6881) | 6881         | 6890         | 6900        | 6910          | 6920        | 6930       | 6940       | 6950      | 6960       |                |
|                                                                                                 | (6632) | GCTACTCATG   | TTTTAGCT     | GCTGTTAA    | TAGTGTCC      | TGG-GATAC   | TATAGCTA   | ATTATGCT   | AAGCCTTTT | CTTAAC--   | AA             |
|                                                                                                 | (6331) | ---AATGAGC   | GAAATTGTG    | GCCGCAAA    | GCCTGACAT     | CGATGACG    | ATTGCTATA  | CGACTAT    | GAGTTGGAG | CGTGT      | TTTTAA         |
|                                                                                                 |        | Section 88   |              |             |               |             |            |            |           |            |                |
| SARS-CoV-2 Reference Genome NC_045512.2<br>Alternaria brassicicola endornavirus isolate 1 NC... | (6961) | 6961         | 6970         | 6980        | 6990          | 7000        | 7010       | 7020       | 7030      | 7040       |                |
|                                                                                                 | (6709) | AGTTGTTAGT   | ACAACTAC     | TAAACATAG   | TACACGGT      | TTTTAAAC    | GGTGT      | TTGTACTA   | ATTATAT   | GCCTTATTT  | -CTTTAC        |
|                                                                                                 | (6408) | GCCAGGAAT    | CGAGGCTA     | TGAGCCAGC   | AGACGACG      | --AAGAG     | CACGAT     | GGATCCCA   | ATTTCGG   | GCCTGGG    | CCGACGATT      |
|                                                                                                 |        | Section 89   |              |             |               |             |            |            |           |            |                |
| SARS-CoV-2 Reference Genome NC_045512.2<br>Alternaria brassicicola endornavirus isolate 1 NC... | (7041) | 7041         | 7050         | 7060        | 7070          | 7080        | 7090       | 7100       | 7110      | 7120       |                |
|                                                                                                 | (6787) | TTTATTGCTA   | CAATTGTG     | TACTAGAA    | GTACAAAT      | TCATAGA--   | ATTAAAG    | CATCTAT    | GCCGACTA  | CTATAGCAAA |                |
|                                                                                                 | (6486) | GAGAT-GACG   | CAACCAGCGT   | CGCGCCGAGT  | GCATTGAA      | CTCAACGTG   | ATTGATC    | CGACTC     | -----CT   | GAGTTGGA   |                |
|                                                                                                 |        | Section 90   |              |             |               |             |            |            |           |            |                |
| SARS-CoV-2 Reference Genome NC_045512.2<br>Alternaria brassicicola endornavirus isolate 1 NC... | (7121) | 7121         | 7130         | 7140        | 7150          | 7160        | 7170       | 7180       | 7190      | 7200       |                |
|                                                                                                 | (6865) | GAACTACTGTT  | AAGAGTGT     | CGGTAAATTTT | GTCTAGAGG     | CTCATTTA    | ATTATTGA   | AGTCA      | CCTAA     | TTT        | TTCTAACTGA     |
|                                                                                                 | (6556) | GCA-----G    | AAGAGTTCAA   | GACTCGA-    | GGACAGAGG     | AAACGCAC    | AAATGT--   | CAGC       | CA        | GAGGC      | TTGTTCTTATCACC |
|                                                                                                 |        | Section 91   |              |             |               |             |            |            |           |            |                |
| SARS-CoV-2 Reference Genome NC_045512.2<br>Alternaria brassicicola endornavirus isolate 1 NC... | (7201) | 7201         | 7210         | 7220        | 7230          | 7240        | 7250       | 7260       | 7270      | 7280       |                |
|                                                                                                 | (6945) | TAAATATTATA  | AATTTGGTTTTT | ACTATT      | AAGT-GTT      | TGCCTAG     | GTTC       | TTAATCT    | ACTCA     | CCGCT      | GCTTTAGGTGTTTT |
|                                                                                                 | (6628) | AGATCAGCT    | GCCGCACACACA | ACTCCC      | AAGGAC        | TGAGTGAC    | GACGTGGG   | AGGTGC     | CAAGT     | GCGGA-AT   | GGTATACG       |

SARS-CoV-2 & *Alternaria brassicicola* endornavirus.apr

|                                                            |  |        |                                                                                                                                                         |      |      |      |      |      |      |      |      |            |
|------------------------------------------------------------|--|--------|---------------------------------------------------------------------------------------------------------------------------------------------------------|------|------|------|------|------|------|------|------|------------|
|                                                            |  | (7281) | 7281                                                                                                                                                    | 7290 | 7300 | 7310 | 7320 | 7330 | 7340 | 7350 | 7360 | Section 92 |
| SARS-CoV-2 Reference Genome NC_045512.2                    |  | (7024) | --AA <b>TGT</b> -----CTAATTT <b>AGG</b> CATGCCTT <b>CTTACTGTACTGGTTACAGAGA--AGGCTATT<b>TGAAC</b>TCTA<b>CTAAT</b>----</b> G                              |      |      |      |      |      |      |      |      |            |
| Alternaria brassicicola endornavirus isolate 1 NC_045512.1 |  | (6707) | AAA <b>AACGT</b> ATTTATGGTCAA <b>AGG</b> ATCAAACC <b>C</b> GACAA <b>GCATTGGC</b> AAG <b>GAGTC</b> AA <b>GATTTTGAAC</b> ATGG <b>CGGAT</b> TCGT <b>G</b>  |      |      |      |      |      |      |      |      |            |
|                                                            |  | (7361) | 7361                                                                                                                                                    | 7370 | 7380 | 7390 | 7400 | 7410 | 7420 | 7430 | 7440 | Section 93 |
| SARS-CoV-2 Reference Genome NC_045512.2                    |  | (7092) | <b>TCACTA</b> --TT <b>GCAA</b> ---CCTA <b>CTGTAC-TGGTCTAT-ACCTTGTA</b> GTGTTT <b>GTCTTAGT--GGTT</b> TAG <b>ATTCTTT</b> AGAC                             |      |      |      |      |      |      |      |      |            |
| Alternaria brassicicola endornavirus isolate 1 NC_045512.1 |  | (6787) | <b>TGCCAAACGGGGCAA</b> CGGAAGT <b>C</b> ATG <b>ACGTGGATC</b> GAAG <b>ACCTGATA</b> TGACG <b>GTGTGGGACGGTT</b> GGT <b>AAGA</b> <b>TTTT</b> GTCG           |      |      |      |      |      |      |      |      |            |
|                                                            |  | (7441) | 7441                                                                                                                                                    | 7450 | 7460 | 7470 | 7480 | 7490 | 7500 | 7510 | 7520 | Section 94 |
| SARS-CoV-2 Reference Genome NC_045512.2                    |  | (7163) | <b>ACCTATCCTTCTTA</b> <b>GAA</b> --AC <b>TATACAATTACC</b> ATTT <b>CATCTTTTAAATG-GG</b> ATTT <b>AACT</b> TGCTTTT <b>GGCTT</b> AGT <b>TGC</b>             |      |      |      |      |      |      |      |      |            |
| Alternaria brassicicola endornavirus isolate 1 NC_045512.1 |  | (6867) | <b>GCATGATGT</b> <b>TTGCAGC</b> <b>GAA</b> CTGG <b>T</b> CG <b>AGCACTG</b> AAAA <b>ACAATCCGGCGGTGGTTC</b> GC <b>AAACGTGT</b> TAAGCA <b>GTGAAAGT</b> CGA |      |      |      |      |      |      |      |      |            |
|                                                            |  | (7521) | 7521                                                                                                                                                    | 7530 | 7540 | 7550 | 7560 | 7570 | 7580 | 7590 | 7600 | Section 95 |
| SARS-CoV-2 Reference Genome NC_045512.2                    |  | (7240) | <b>AGAGTGGTTTTT</b> <b>GGCATAT</b> AT-TCTTTT <b>C--ACTAGG</b> TTTT <b>TCTATGTACTTTGGATTGG</b> GC <b>---</b> AATC <b>ATGCAATTG</b> T                     |      |      |      |      |      |      |      |      |            |
| Alternaria brassicicola endornavirus isolate 1 NC_045512.1 |  | (6947) | <b>AAGAGCGAAGAAGCAGCAT</b> GGGAGGCAG <b>C</b> GAAAA <b>AGGAGGC</b> TGAGCA <b>TAATAGGTTTG</b> AGAGGGTGCCAG <b>AAACATTG</b> C                             |      |      |      |      |      |      |      |      |            |
|                                                            |  | (7601) | 7601                                                                                                                                                    | 7610 | 7620 | 7630 | 7640 | 7650 | 7660 | 7670 | 7680 | Section 96 |
| SARS-CoV-2 Reference Genome NC_045512.2                    |  | (7314) | <b>TTTTCAGCTATTTT</b> <b>G</b> CAGT <b>ACAT</b> TTT-- <b>ATTAGTAATTCTTGGCTTATGTGGT</b> <b>TAATAATTAACT</b> TTGTA <b>CAATGG</b> CCC                      |      |      |      |      |      |      |      |      |            |
| Alternaria brassicicola endornavirus isolate 1 NC_045512.1 |  | (7027) | <b>TAT--AAGTA</b> CGGC <b>G</b> TCTG <b>ACAT</b> CGGCC <b>AGATGCAACACGAGG</b> GC <b>--AGG</b> TCAT <b>ACA</b> A-- <b>GAGC</b> GGCGG <b>CCCATG</b> CCAA  |      |      |      |      |      |      |      |      |            |
|                                                            |  | (7681) | 7681                                                                                                                                                    | 7690 | 7700 | 7710 | 7720 | 7730 | 7740 | 7750 | 7760 | Section 97 |
| SARS-CoV-2 Reference Genome NC_045512.2                    |  | (7392) | <b>CGA</b> TTTC <b>AGCTATGGTT</b> <b>AGAA</b> T <b>TACATC-----TCTCTTGCATCA</b> TTTTATT <b>ATGTATGGA</b> AA <b>AGTTATGTG-CAT</b> GTT                     |      |      |      |      |      |      |      |      |            |
| Alternaria brassicicola endornavirus isolate 1 NC_045512.1 |  | (7101) | <b>CGA</b> AAG- <b>ACAAGTGGTT</b> - <b>GAA</b> AGAGGA <b>AGGCCGGTTCAGTTGCCTCA</b> ACGAGAA <b>ATCCAAGCAGCA</b> AAGGCCAG <b>GGCA</b> AGCC                 |      |      |      |      |      |      |      |      |            |
|                                                            |  | (7761) | 7761                                                                                                                                                    | 7770 | 7780 | 7790 | 7800 | 7810 | 7820 | 7830 | 7840 | Section 98 |
| SARS-CoV-2 Reference Genome NC_045512.2                    |  | (7466) | <b>GTAGACGGGTGT</b> <b>TAATT</b> <b>CATCAACTTTG</b> TATG <b>ATGTGTTACAAAC</b> GTAATAGA <b>GC</b> AA <b>CAAGAG</b> TCG <b>AA</b> T <b>GTACAACTA-TT</b> G |      |      |      |      |      |      |      |      |            |
| Alternaria brassicicola endornavirus isolate 1 NC_045512.1 |  | (7179) | <b>CGACAAGCGTGA</b> AGAG <b>CTTGGTT</b> CAG <b>A--ATATTGAGA</b> AAGGGCGTGT <b>CGGCCG</b> <b>CACCA</b> AG <b>---</b> AA <b>AGST</b> CGAG <b>CAAGTT</b>   |      |      |      |      |      |      |      |      |            |

SARS-CoV-2 & Alternaria brassicicola endornavirus.apr

|                                                      |        |             |          |        |             |        |          |       |         |        |              |
|------------------------------------------------------|--------|-------------|----------|--------|-------------|--------|----------|-------|---------|--------|--------------|
|                                                      |        | Section 99  |          |        |             |        |          |       |         |        |              |
|                                                      |        | (7841)      | 7841     | 7850   | 7860        | 7870   | 7880     | 7890  | 7900    | 7910   | 7920         |
| SARS-CoV-2 Reference Genome NC_045512.2              | (7545) | TTAA        | TG       | GTGTT  | AGA         | AGTCT  | CTT      | TTA   | TGTCT   | ATG    | CTAATGGAGGTA |
| Alternaria brassicicola endornavirus isolate 1 NC... | (7253) | TTAA        | AC       | GAGCA  | ATT         | AGCCG  | CTT      | CCA   | GC      | GAAAC  | CAGC         |
|                                                      |        | Section 100 |          |        |             |        |          |       |         |        |              |
|                                                      |        | (7921)      | 7921     | 7930   | 7940        | 7950   | 7960     | 7970  | 7980    | 7990   | 8000         |
| SARS-CoV-2 Reference Genome NC_045512.2              | (7623) | TT          | AAT      | TG     | TGATACATTCT | GT     | GC       | TG    | G       | TAGTAC | ATTTA        |
| Alternaria brassicicola endornavirus isolate 1 NC... | (7331) | AA          | AGC      | TG     | GCCGCATGATC | G      | A        | TG    | AACTGGG | ACTT   | CA           |
|                                                      |        | Section 101 |          |        |             |        |          |       |         |        |              |
|                                                      |        | (8001)      | 8001     | 8010   | 8020        | 8030   | 8040     | 8050  | 8060    | 8070   | 8080         |
| SARS-CoV-2 Reference Genome NC_045512.2              | (7700) | AG          | ACCAAT   | AAATCC | TAC         | T      | GAC      | CAG   | TC      | TTCTT  | ACAT         |
| Alternaria brassicicola endornavirus isolate 1 NC... | (7411) | G           | A        | ATGGGA | -----       | T      | G        | C     | GAT     | CA     | TC           |
|                                                      |        | Section 102 |          |        |             |        |          |       |         |        |              |
|                                                      |        | (8081)      | 8081     | 8090   | 8100        | 8110   | 8120     | 8130  | 8140    | 8150   | 8160         |
| SARS-CoV-2 Reference Genome NC_045512.2              | (7780) | TG          | ATAAAGCT | GGTCAA | AAG         | ACTTA  | TGAA     | AGAC  | ATTCT   | --     | CTCTCT       |
| Alternaria brassicicola endornavirus isolate 1 NC... | (7471) | CA          | AGATAAAC | GCCGCC | AAG         | CA---  | TGAA     | GAC   | ACGAT   | TAC    | GAAAG        |
|                                                      |        | Section 103 |          |        |             |        |          |       |         |        |              |
|                                                      |        | (8161)      | 8161     | 8170   | 8180        | 8190   | 8200     | 8210  | 8220    | 8230   | 8240         |
| SARS-CoV-2 Reference Genome NC_045512.2              | (7852) | TAA         | TAA      | CAC    | TAAAG       | GTTC   | ATTGCCTA | TT    | AA      | TGT    | TAT          |
| Alternaria brassicicola endornavirus isolate 1 NC... | (7548) | CCC         | TAA      | TCG    | TGAAG       | CTGG   | ACCAGACG | TT    | TG      | TGT    | ACT          |
|                                                      |        | Section 104 |          |        |             |        |          |       |         |        |              |
|                                                      |        | (8241)      | 8241     | 8250   | 8260        | 8270   | 8280     | 8290  | 8300    | 8310   | 8320         |
| SARS-CoV-2 Reference Genome NC_045512.2              | (7932) | CAGCG       | TC       | TGTT   | TTAC        | TACAG  | STCAG    | CTTAT | GTG     | TCAA   | CC           |
| Alternaria brassicicola endornavirus isolate 1 NC... | (7627) | AGTGC       | TC       | ACAT   | TC          | ATTAAT | GGA      | AG    | ACCGA   | GCCGGG | CC           |
|                                                      |        | Section 105 |          |        |             |        |          |       |         |        |              |
|                                                      |        | (8321)      | 8321     | 8330   | 8340        | 8350   | 8360     | 8370  | 8380    | 8390   | 8400         |
| SARS-CoV-2 Reference Genome NC_045512.2              | (8011) | TAG         | TGC      | GGA    | AGTTGC      | AG     | TT       | AAAA  | TG      | TT     | TG           |
| Alternaria brassicicola endornavirus isolate 1 NC... | (7705) | TAT         | GAA      | GAT    | AGAAT       | AA     | TT       | ---   | TAT     | TG     | CAATGGTAT    |

SARS-CoV-2 & Alternaria brassicicola endornavirus.apr

|                                                            |        |                                                                                                        |      |      |      |      |      |      |      |      |             |
|------------------------------------------------------------|--------|--------------------------------------------------------------------------------------------------------|------|------|------|------|------|------|------|------|-------------|
|                                                            | (8401) | 8401                                                                                                   | 8410 | 8420 | 8430 | 8440 | 8450 | 8460 | 8470 | 8480 | Section 106 |
| SARS-CoV-2 Reference Genome NC_045512.2                    | (8089) | ACTCAAAAAACAGTGGCAACTGCAGAAGCTGAACCTTGCAAATGATGTTCCTTAGACA-ATGCTTTATCTACTTTATT                         |      |      |      |      |      |      |      |      |             |
| Alternaria brassicicola endornavirus isolate 1 NC_024646.1 | (7779) | GCGAATAAAATCAGAGCTTGACGGG---GCTTGAACCTTGCA-CGAATGGCTGCTTAANAACAGCTATTGTGACAATATTGAA                    |      |      |      |      |      |      |      |      |             |
|                                                            | (8481) | 8481                                                                                                   | 8490 | 8500 | 8510 | 8520 | 8530 | 8540 | 8550 | 8560 | Section 107 |
| SARS-CoV-2 Reference Genome NC_045512.2                    | (8168) | TCAAGCAGCTCGGCC--AAGGGTTTGGTTGATTCAGATGTAGAAAATAAAGATGTTGGTTGAATGTCTTAA-AA-TTGTCAATCATC                |      |      |      |      |      |      |      |      |             |
| Alternaria brassicicola endornavirus isolate 1 NC_024646.1 | (7855) | GGCTAAGAAAAAGGTAACGGTTACCATAAGTGGAACCGACGCCTGTATA--TTGGTTGAACGGTCAAGGGCTTAGCGGAAC                      |      |      |      |      |      |      |      |      |             |
|                                                            | (8561) | 8561                                                                                                   | 8570 | 8580 | 8590 | 8600 | 8610 | 8620 | 8630 | 8640 | Section 108 |
| SARS-CoV-2 Reference Genome NC_045512.2                    | (8244) | AAATCTGACATAGAAGT-TAC TGGC GATAGT TGTAAT AA CTATAT G CTC AC CTAT AAC A AGT TG AAAA CAT G -A CCCCC      |      |      |      |      |      |      |      |      |             |
| Alternaria brassicicola endornavirus isolate 1 NC_024646.1 | (7933) | AAAGG GAG CGCG GAC CAATAC ACCT GATACG TC T GCG AA GGGG -- GTCA AC GGTG AAC GAAGT CCTTGT CGAG GAA ATAG- |      |      |      |      |      |      |      |      |             |
|                                                            | (8641) | 8641                                                                                                   | 8650 | 8660 | 8670 | 8680 | 8690 | 8700 | 8710 | 8720 | Section 109 |
| SARS-CoV-2 Reference Genome NC_045512.2                    | (8322) | GTGACCTTG GTGCTTGTTAT TGA CTG TAGT GCCG -- GTCA TATT AAT GC GCAGGTAGCAAAAG TCACAACATTGCTTTGAG          |      |      |      |      |      |      |      |      |             |
| Alternaria brassicicola endornavirus isolate 1 NC_024646.1 | (8010) | GTGACGTTAGAACTTCTGATTATGT TAGAGATACA GTCAAAAAAT TGC TTACCCAAGTTACT TCAGAA GACATGCCCGA                  |      |      |      |      |      |      |      |      |             |
|                                                            | (8721) | 8721                                                                                                   | 8730 | 8740 | 8750 | 8760 | 8770 | 8780 | 8790 | 8800 | Section 110 |
| SARS-CoV-2 Reference Genome NC_045512.2                    | (8400) | TATGGAACGT TTAAGATTT CAT GTC ATTGTCT GAACA ACTAC-GAA ACAAAAT ACGTAG TGCT GCTA AAAAGA TA ACTT           |      |      |      |      |      |      |      |      |             |
| Alternaria brassicicola endornavirus isolate 1 NC_024646.1 | (8090) | ----G CACGTCCAA--CGC--GTC GTTCGGAGGAGCAGTCGATA TACTGGGA AAA TACTG TTC--AA GGCTATTAGGA                  |      |      |      |      |      |      |      |      |             |
|                                                            | (8801) | 8801                                                                                                   | 8810 | 8820 | 8830 | 8840 | 8850 | 8860 | 8870 | 8880 | Section 111 |
| SARS-CoV-2 Reference Genome NC_045512.2                    | (8479) | ACTTTTTAAGTTGACAT GTGCAA CTAC TAGACA AGTTG TTA TGTGTAA CAACA AAGATA GC ACTT AAG GGTGGTAA AA            |      |      |      |      |      |      |      |      |             |
| Alternaria brassicicola endornavirus isolate 1 NC_024646.1 | (8159) | GC--CAGGAGTGCAAT CCCGTG CAGT TATCTG AAACA TGGAACGAAAT AA AACA CACCT GC CGCT CAT GGTAGGTC AA            |      |      |      |      |      |      |      |      |             |
|                                                            | (8881) | 8881                                                                                                   | 8890 | 8900 | 8910 | 8920 | 8930 | 8940 | 8950 | 8960 | Section 112 |
| SARS-CoV-2 Reference Genome NC_045512.2                    | (8559) | TTGTTAATAAT TGGT-TGAAGCAGTTA ATT AAA GT TACA CTGTGTGT CTTTTTGTGT GCTGCTAT TTT TCTAT TTATAAC            |      |      |      |      |      |      |      |      |             |
| Alternaria brassicicola endornavirus isolate 1 NC_024646.1 | (8237) | GAGCATCAAATAGTGTTAAACAAGGG AGA AAA --TACA AGGCATAC ACACCATAC GC GACACTAATAACCTTGA--TAG                 |      |      |      |      |      |      |      |      |             |



SARS-CoV-2 & Alternaria brassicicola endornavirus.apr

|                                                                                                 |        |             |             |            |            |             |            |             |           |             |                   |
|-------------------------------------------------------------------------------------------------|--------|-------------|-------------|------------|------------|-------------|------------|-------------|-----------|-------------|-------------------|
|                                                                                                 |        | Section 113 |             |            |            |             |            |             |           |             |                   |
| SARS-CoV-2 Reference Genome NC_045512.2<br>Alternaria brassicicola endornavirus isolate 1 NC... | (8961) | 8961        | 8970        | 8980       | 8990       | 9000        | 9010       | 9020        | 9030      | 9040        |                   |
|                                                                                                 | (8638) | ACCTGTT     | CATGTCATGTC | TAAACAT    | ACTGACTT   | TCAAGT      | GAAATCAT   | AGGATACA    | AGGCTAT   | TGATGG      | TGGTGTCACTC       |
|                                                                                                 | (8313) | ACATCGA     | CCG-----G   | TGACAGC    | AAGGGCC    | T-----G     | GTAGCAT    | --GCTGCA    | TTCCAAG   | TGGA        | CTG--GCAAAAC      |
|                                                                                                 |        | Section 114 |             |            |            |             |            |             |           |             |                   |
| SARS-CoV-2 Reference Genome NC_045512.2<br>Alternaria brassicicola endornavirus isolate 1 NC... | (9041) | 9041        | 9050        | 9060       | 9070       | 9080        | 9090       | 9100        | 9110      | 9120        |                   |
|                                                                                                 | (8718) | GTGACATA    | GCACTCTACA  | GATAC      | TGTGTTT    | TGCTAACAA   | ACATGCTGA  | TTTGTGAC    | ACATGGTTT | TAGCCAGCG   | TGGTGGTAGT        |
|                                                                                                 | (8377) | CACTTTAT    | GCACTAA     | -GAGC      | CTGAT      | TAAATACC    | AAGATAT    | TGATGA      | CCTCATG   | ACCACAGAAGA | CTTGTGTGACATAAAT  |
|                                                                                                 |        | Section 115 |             |            |            |             |            |             |           |             |                   |
| SARS-CoV-2 Reference Genome NC_045512.2<br>Alternaria brassicicola endornavirus isolate 1 NC... | (9121) | 9121        | 9130        | 9140       | 9150       | 9160        | 9170       | 9180        | 9190      | 9200        |                   |
|                                                                                                 | (8798) | TATACT      | AATGACAA    | --AGCTT    | GCCCATTTG  | ATTGTG      | CTGCA      | AGT---CAT   | TAACAAG   | GAGAGAGT    | TGGTTTTCGTGCC     |
|                                                                                                 | (8456) | GACATC      | AATTTGAA    | TGAAG      | GAATGTTT   | TTGGT       | TCAGAAAA   | AAGGTACAGAT | CAAAAG    | TTCAAGAG    | TGGATCATCAATAGGCC |
|                                                                                                 |        | Section 116 |             |            |            |             |            |             |           |             |                   |
| SARS-CoV-2 Reference Genome NC_045512.2<br>Alternaria brassicicola endornavirus isolate 1 NC... | (9201) | 9201        | 9210        | 9220       | 9230       | 9240        | 9250       | 9260        | 9270      | 9280        |                   |
|                                                                                                 | (8872) | GC-CTGGC    | ACGATATTAC  | GCACAACTA  | ATGGTGA    | CTTTTTC     | CACTTCTTA  | CTAGAGT     | TTTTTGT   | GCAGTTGGTAA | CATC              |
|                                                                                                 | (8536) | -CAGGAAG    | AGGATCTT    | --GCTATG   | CCACC      | CCAGAGCAGG  | --TTGAAGG  | CTTGATTA    | ACAACGT   | CTCGTAGTAA  | TACC              |
|                                                                                                 |        | Section 117 |             |            |            |             |            |             |           |             |                   |
| SARS-CoV-2 Reference Genome NC_045512.2<br>Alternaria brassicicola endornavirus isolate 1 NC... | (9281) | 9281        | 9290        | 9300       | 9310       | 9320        | 9330       | 9340        | 9350      | 9360        |                   |
|                                                                                                 | (8951) | TGTTACAC    | ACCATCAA    | AACTTAT    | AGAGTACAC  | TGACTTTG    | CAACAT     | CAGCTTGT    | GTTT---TG | GCTGCTGA    | ATGT-ACAA         |
|                                                                                                 | (8611) | AAAGTGGG    | ATCTCGGG    | AAAGCAT    | GAGCGACG   | TGACAAAC    | CAAGGCTG   | ATCAAGT     | GCACAG    | GAGAGAAA    | ATCGGCCCGT        |
|                                                                                                 |        | Section 118 |             |            |            |             |            |             |           |             |                   |
| SARS-CoV-2 Reference Genome NC_045512.2<br>Alternaria brassicicola endornavirus isolate 1 NC... | (9361) | 9361        | 9370        | 9380       | 9390       | 9400        | 9410       | 9420        | 9430      | 9440        |                   |
|                                                                                                 | (9027) | TTTTTAA     | AGATGCTTCT  | GTAAGCCAG  | TACCATAT   | TGTTAT      | GATACCA    | ATG-TAC     | TAGAAG    | GTCTTGTT    | GCTTATGAA-A       |
|                                                                                                 | (8691) | CAAACC      | ATGATGAAATG | GAGAC      | GATGATAGAT | TGTGGCG     | GAAAC-ACG  | GCTAC--GCCT | GTCA      | TGAGAA      | TGGGAAACG         |
|                                                                                                 |        | Section 119 |             |            |            |             |            |             |           |             |                   |
| SARS-CoV-2 Reference Genome NC_045512.2<br>Alternaria brassicicola endornavirus isolate 1 NC... | (9441) | 9441        | 9450        | 9460       | 9470       | 9480        | 9490       | 9500        | 9510      | 9520        |                   |
|                                                                                                 | (9105) | GTTTAC      | -GCCCTGACA  | CACGTTATGT | GCTCAT     | GATGGCTCTAT | TATTCA     | ATTTCC      | TAAACAC   | CTACCT      | TGAAGGTTCTGT      |
|                                                                                                 | (8768) | TACGAC      | AGCAAC      | GAACCA     | AACGCCAC   | GCGATC      | GATGGTTTCT | GAA-CAC     | CGACAG    | ACCGGT      | ACACGAGATTAAAGC   |

SARS-CoV-2 & Alternaria brassicicola endornavirus.apr

|                                                      |        |                                                                                    |       |       |       |       |       |       |       |       |       |
|------------------------------------------------------|--------|------------------------------------------------------------------------------------|-------|-------|-------|-------|-------|-------|-------|-------|-------|
|                                                      |        | Section 120                                                                        |       |       |       |       |       |       |       |       |       |
|                                                      |        | (9521)                                                                             | 9521  | 9530  | 9540  | 9550  | 9560  | 9570  | 9580  | 9590  | 9600  |
| SARS-CoV-2 Reference Genome NC_045512.2              | (9184) | TAGAGTGGTAAACAACTTTTGATTCTGAGTACTGTAGGCACGGCACTTGTGAAAGATCAGGAAGCTGGTGTTTGTGTATC   |       |       |       |       |       |       |       |       |       |
| Alternaria brassicicola endornavirus isolate 1 NC... | (8847) | TACCCACAAACGGTTCGACGAAATCACGCCTGTGTACACAACGTGAAAGCAGCATGTTACGGTGAATTGCCACGC        |       |       |       |       |       |       |       |       |       |
|                                                      |        | Section 121                                                                        |       |       |       |       |       |       |       |       |       |
|                                                      |        | (9601)                                                                             | 9601  | 9610  | 9620  | 9630  | 9640  | 9650  | 9660  | 9670  | 9680  |
| SARS-CoV-2 Reference Genome NC_045512.2              | (9262) | TACTAGTGGTAGATGG--GTACTTAACAAATGATTATTACAGATCTTTACCAAGGAGTTTCTGTGGTGTAGATGCTGTAA   |       |       |       |       |       |       |       |       |       |
| Alternaria brassicicola endornavirus isolate 1 NC... | (8926) | ACCACCTGTATACCAACCGGTCACTAGTGAAGTACATCAATCAACTGTACAACTCATTACGACGCGCATCCAAGGAGA     |       |       |       |       |       |       |       |       |       |
|                                                      |        | Section 122                                                                        |       |       |       |       |       |       |       |       |       |
|                                                      |        | (9681)                                                                             | 9681  | 9690  | 9700  | 9710  | 9720  | 9730  | 9740  | 9750  | 9760  |
| SARS-CoV-2 Reference Genome NC_045512.2              | (9339) | ATT-TACTTACTAATAATGTTTACACCACT-AAATCAACCTATTGGTGCTTTGGACATATCAGCATCTATAGTAGCTGGTG  |       |       |       |       |       |       |       |       |       |
| Alternaria brassicicola endornavirus isolate 1 NC... | (9004) | AGTATCATACAGAAACAAGTGGTTGATCCAGTGAAGAATTGTGAACGAGTCGCCAAACAATTCCTTAAGCCAG--GGTG    |       |       |       |       |       |       |       |       |       |
|                                                      |        | Section 123                                                                        |       |       |       |       |       |       |       |       |       |
|                                                      |        | (9761)                                                                             | 9761  | 9770  | 9780  | 9790  | 9800  | 9810  | 9820  | 9830  | 9840  |
| SARS-CoV-2 Reference Genome NC_045512.2              | (9417) | GTATTGTAGCTATCCTAGTAACATGCCCTTGCTTCTATTATTATG--AGGTTTAGAAGAGCTTTTGGTGAATACAGTCATG  |       |       |       |       |       |       |       |       |       |
| Alternaria brassicicola endornavirus isolate 1 NC... | (9082) | G----GAAGCCATGCTCGAGGAATTTGTTGAAAACCCAGTGTCTGCCAGGATACAAATTGACCGAAGAAATGGCTGAGCATG |       |       |       |       |       |       |       |       |       |
|                                                      |        | Section 124                                                                        |       |       |       |       |       |       |       |       |       |
|                                                      |        | (9841)                                                                             | 9841  | 9850  | 9860  | 9870  | 9880  | 9890  | 9900  | 9910  | 9920  |
| SARS-CoV-2 Reference Genome NC_045512.2              | (9495) | TAGTTGCCTTAAATCTTTACTATTCCTTATGTCATTCACTGTACTCTGTTTAACACAGTTTACT--CATTCTTACCT      |       |       |       |       |       |       |       |       |       |
| Alternaria brassicicola endornavirus isolate 1 NC... | (9158) | AAGG-GCGATCCAGAACCGACAATGAAAGAAT-----AAAGTCAACATCTTGGACGACTTTAATTCGCATGCCGTACAA    |       |       |       |       |       |       |       |       |       |
|                                                      |        | Section 125                                                                        |       |       |       |       |       |       |       |       |       |
|                                                      |        | (9921)                                                                             | 9921  | 9930  | 9940  | 9950  | 9960  | 9970  | 9980  | 9990  | 10000 |
| SARS-CoV-2 Reference Genome NC_045512.2              | (9572) | GGTGTTTTATTCTGTTATTACTTGTACTTGACATTT-TATCTTACTAAFGATGTTTCTTTTTTAGCACATATTCAGTGGA   |       |       |       |       |       |       |       |       |       |
| Alternaria brassicicola endornavirus isolate 1 NC... | (9232) | CAAAATGCAAACTGCATTTAAAGTCGGAACGCTTTTAAAGAGCAGGTGACAGGTTTGAAG-ACCAATCGGTAGAGTG      |       |       |       |       |       |       |       |       |       |
|                                                      |        | Section 126                                                                        |       |       |       |       |       |       |       |       |       |
|                                                      |        | (10001)                                                                            | 10001 | 10010 | 10020 | 10030 | 10040 | 10050 | 10060 | 10070 | 10080 |
| SARS-CoV-2 Reference Genome NC_045512.2              | (9651) | TGGTTATGTTCAACCTTTAGTACCTTCTGTGATAACAATTGCTTATATCATTTGTT--ATTTCCACAAAGCATTTCTAT    |       |       |       |       |       |       |       |       |       |
| Alternaria brassicicola endornavirus isolate 1 NC... | (9311) | ATCGTTGTGGCACCCAAACCCTTCTGTGCTGTGTTATGTCCGGTGATCAACTTGATGAAAGAGCGATTTAAGTTGCTTCT   |       |       |       |       |       |       |       |       |       |

SARS-CoV-2 & Alternaria brassicicola endornavirus.apr

|                                                      |         |            |            |            |           |           |             |             |            |            |              |             |          |
|------------------------------------------------------|---------|------------|------------|------------|-----------|-----------|-------------|-------------|------------|------------|--------------|-------------|----------|
| Section 127                                          |         |            |            |            |           |           |             |             |            |            |              |             |          |
|                                                      | (10081) | 10081      | 10090      | 10100      | 10110     | 10120     | 10130       | 10140       | 10150      | 10160      |              |             |          |
| SARS-CoV-2 Reference Genome NC_045512.2              | (9728)  | TGGTTC     | TTTAGTAAT  | TACCTAAAGA | GACGTGT   | TAGTCTTT  | TAA         | TGGTGTTC    | CTTTAGTAC  | TTTTGAAGAA | GCTGCGCTGTG  |             |          |
| Alternaria brassicicola endornavirus isolate 1 NC... | (9391)  | TGACAAAGAA | AAAAAT     | AGTGTACACT | GACG      | GCTGCGACA | TGAACGAG    | ATTTCAGTT   | CCACGTT    | CAGAACCT   | GCATCCAGAA-- |             |          |
| Section 128                                          |         |            |            |            |           |           |             |             |            |            |              |             |          |
|                                                      | (10161) | 10161      | 10170      | 10180      | 10190     | 10200     | 10210       | 10220       | 10230      | 10240      |              |             |          |
| SARS-CoV-2 Reference Genome NC_045512.2              | (9808)  | CACCTTTT   | TGTAAATA   | AAGAAATGT  | ATCTAAAG  | TTTGGT    | AGTGA       | TGTGCTATTAC | CTCTTACGC  | AATAATA    | TAGATACT     |             |          |
| Alternaria brassicicola endornavirus isolate 1 NC... | (9469)  | CAAAAGT    | CATCGAGAT  | TGGATT     | TGAAAAACA | AGACAG    | GCAACTGA    | CATGCGACG   | CTTGAG     | AATGAAT    | TCGTTTAAATGA |             |          |
| Section 129                                          |         |            |            |            |           |           |             |             |            |            |              |             |          |
|                                                      | (10241) | 10241      | 10250      | 10260      | 10270     | 10280     | 10290       | 10300       | 10310      | 10320      |              |             |          |
| SARS-CoV-2 Reference Genome NC_045512.2              | (9888)  | TAGCTCT    | TTATAA     | TAAAGTACAA | AG-TATTT  | TAGTGGAG  | CAATGGA     | TACAAC      | TAGCTACA   | GAGAAG     | CTGCTTGTTC   | GTCATCT     |          |
| Alternaria brassicicola endornavirus isolate 1 NC... | (9549)  | CAGCCT     | GGGTTT     | TCTTCT     | TATATGCC  | GCTGTGG   | CGCGCT      | TACAAC      | GAAAATTG   | GCGTTA     | CAAAGCC      | TGGATATG    |          |
| Section 130                                          |         |            |            |            |           |           |             |             |            |            |              |             |          |
|                                                      | (10321) | 10321      | 10330      | 10340      | 10350     | 10360     | 10370       | 10380       | 10390      | 10400      |              |             |          |
| SARS-CoV-2 Reference Genome NC_045512.2              | (9967)  | CGCAAGAG   | GCTCTCAA-- | TGACTTCA   | AGTAACT   | CAGGTTCT  | GATGTTCTTT  | TACCAACCAC  | CACAAACC   | TCTATC     | ACCTCAGC     |             |          |
| Alternaria brassicicola endornavirus isolate 1 NC... | (9629)  | ACGGAGAG   | GCTGGCAGGT | TGGGAAAAG  | GAAACCG   | GGGGAC    | GAAATGACC   | TCACTAGG--  | CACACG     | TCAAAA     | ACATGAGC     |             |          |
| Section 131                                          |         |            |            |            |           |           |             |             |            |            |              |             |          |
|                                                      | (10401) | 10401      | 10410      | 10420      | 10430     | 10440     | 10450       | 10460       | 10470      | 10480      |              |             |          |
| SARS-CoV-2 Reference Genome NC_045512.2              | (10045) | TGTTTTC    | GAGAGTG    | GTTT       | TAGAAAAAT | GGCATT    | CCCCATC-T   | GGTAAAG     | TTGAGG     | GTGTATGG   | TACAAGTA     | ACTTGTGGT   |          |
| Alternaria brassicicola endornavirus isolate 1 NC... | (9707)  | GGAAAT     | CGCCGAG    | CCGTTT     | GTGAGGT   | ATAACAC   | CAGAAAGGG   | TCTTATT     | TTGAGC     | GATGACAT   | GA-----      | TAGCGTTTGGG |          |
| Section 132                                          |         |            |            |            |           |           |             |             |            |            |              |             |          |
|                                                      | (10481) | 10481      | 10490      | 10500      | 10510     | 10520     | 10530       | 10540       | 10550      | 10560      |              |             |          |
| SARS-CoV-2 Reference Genome NC_045512.2              | (10124) | ACAAC      | TACACTTA   | ACGGTCTT   | TGGCTTGA  | TGACGTAG  | TTTACTGTCC  | AAGACATGTG  | ATCTGCACC  | TCTGAA     | GACATGCT     |             |          |
| Alternaria brassicicola endornavirus isolate 1 NC... | (9782)  | AGAAC      | CGATTGGG   | ACCAAAGG   | TGGGTTGA  | GATCACT   | TAAAGAGACAA | ATTCAATGTG  | CAATGTGAAT | TGGGCT     | GGGGAA       |             |          |
| Section 133                                          |         |            |            |            |           |           |             |             |            |            |              |             |          |
|                                                      | (10561) | 10561      | 10570      | 10580      | 10590     | 10600     | 10610       | 10620       | 10630      | 10640      |              |             |          |
| SARS-CoV-2 Reference Genome NC_045512.2              | (10204) | TAA        | CCCTAA     | TTATGAAG   | ATTATATC  | ATTCGTAAG | TCTAA       | TCATAAT     | TTCTTGGTA  | CAGGC      | TGGTAATGTT   | CACTCAGG    |          |
| Alternaria brassicicola endornavirus isolate 1 NC... | (9862)  | AAGCGGA    | AAATTT     | TGTCAGC    | TAGTC---- | GT        | CAGCCCTG    | TTCGAGG     | TTTGGATT   | CA         | TCGTGG       | CTGCAGATA   | ATAAACGA |

SARS-CoV-2 & Alternaria brassicicola endornavirus.apr

|                                                      |         |            |            |            |               |           |           |            |                |                                  |
|------------------------------------------------------|---------|------------|------------|------------|---------------|-----------|-----------|------------|----------------|----------------------------------|
|                                                      |         |            |            |            |               |           |           |            |                | Section 134                      |
|                                                      | (10641) | 10641      | 10650      | 10660      | 10670         | 10680     | 10690     | 10700      | 10710          | 10720                            |
| SARS-CoV-2 Reference Genome NC_045512.2              | (10284) | TTATTG     | GACATTCTAT | GCAAAA     | TTGTGTACTTA   | AGCTTA    | AGGTT-GAT | ACAGCC     | AAATCCTAAG     | ACACCTAAGTATAAGTT                |
| Alternaria brassicicola endornavirus isolate 1 NC... | (9938)  | TTAGCC     | GACAGTTCAG | GAGTTG     | TTAAGAGCTCA   | TAAACC    | AGGGAAGAT | GAAGAC     | TGGGACGCTA     | AGGTGCTACAGTTACTT                |
|                                                      |         |            |            |            |               |           |           |            |                | Section 135                      |
|                                                      | (10721) | 10721      | 10730      | 10740      | 10750         | 10760     | 10770     | 10780      | 10790          | 10800                            |
| SARS-CoV-2 Reference Genome NC_045512.2              | (10363) | TGTT       | CGCATTCAA  | CCAGGAC    | AGACTTTTTCAG  | TGTTAGC   | TTGTTACA  | ATGGTTCA   | CCATCTGGT      | GTTTACCAATGTGCTA                 |
| Alternaria brassicicola endornavirus isolate 1 NC... | (10018) | AAGC       | CTGATAGGG  | CCTTGTGATG | CTACCAACAT    | CACAGG    | CAGCAAA   | TGAAC      | TGCGAGACCG     | GTT---CAATGGGCA                  |
|                                                      |         |            |            |            |               |           |           |            |                | Section 136                      |
|                                                      | (10801) | 10801      | 10810      | 10820      | 10830         | 10840     | 10850     | 10860      | 10870          | 10880                            |
| SARS-CoV-2 Reference Genome NC_045512.2              | (10443) | TGAG       | GCCCAATT   | TCACTA     | TTAAGGGTTCATT | CTTAATGGT | TCA       | TGTGGTAGTG | TTGGT          | TTTAACATAGATTATGACTGT            |
| Alternaria brassicicola endornavirus isolate 1 NC... | (10095) | GGTC       | GTGGGGCC   | TGAGGT     | TGCAAGCGAACGC | GAATA     | CCATAAAG  | TCAC       | TGGTGAGGAG     | TTGGACAGAGACGTAAAC---            |
|                                                      |         |            |            |            |               |           |           |            |                | Section 137                      |
|                                                      | (10881) | 10881      | 10890      | 10900      | 10910         | 10920     | 10930     | 10940      | 10950          | 10960                            |
| SARS-CoV-2 Reference Genome NC_045512.2              | (10523) | GTCTCT     | TTTTGTT    | ACATGC     | CACCATATG     | GAA       | TT--ACCA  | ACTGGAG    | TTCA           | TGCTGGCACAGACTTAGAAGGTTAACTTTTAT |
| Alternaria brassicicola endornavirus isolate 1 NC... | (10172) | GCCTTG     | TGCCACA    | ACATG      | ATGTATAGC     | GTTT      | GGAAAAC   | GGACC      | TTCA           | ACGTGTTGGGCACATAGGTTCAAAACCA     |
|                                                      |         |            |            |            |               |           |           |            |                | Section 138                      |
|                                                      | (10961) | 10961      | 10970      | 10980      | 10990         | 11000     | 11010     | 11020      | 11030          | 11040                            |
| SARS-CoV-2 Reference Genome NC_045512.2              | (10601) | GGACC      | TTT        | TTGTTGA    | CAGGCA        | AACAG     | CACAAG    | CAG        | CTGGTACGGACACA | ACTATTACAGTTAATGTTTTAGCTTGGTTGTA |
| Alternaria brassicicola endornavirus isolate 1 NC... | (10252) | GTGAATG    | TTGTTGA    | TGTTGG     | AGGAG         | GGGGCC    | CC        | CCCC       | -----          | -----                            |
|                                                      |         |            |            |            |               |           |           |            |                | Section 139                      |
|                                                      | (11041) | 11041      | 11050      | 11060      | 11070         | 11080     | 11090     | 11100      | 11110          | 11120                            |
| SARS-CoV-2 Reference Genome NC_045512.2              | (10681) | CGCTGCTGTT | TATAAAT    | GGAGACAGG  | TGGTTTCTCAAT  | CGATT     | TACCACA   | ACTCTTAAT  | GACTTTAACCT    | TGTGGCTATGA                      |
| Alternaria brassicicola endornavirus isolate 1 NC... | (10291) | -----      | -----      | -----      | -----         | -----     | -----     | -----      | -----          | -----                            |
|                                                      |         |            |            |            |               |           |           |            |                | Section 140                      |
|                                                      | (11121) | 11121      | 11130      | 11140      | 11150         | 11160     | 11170     | 11180      | 11190          | 11200                            |
| SARS-CoV-2 Reference Genome NC_045512.2              | (10761) | AGTACA     | ATTATGA    | ACCTCTA    | ACACAAG       | ACCATG    | TGACATA   | CTAGGACCT  | CTTTCTGCT      | CAAACTGGAATTGCCGTTTTA            |
| Alternaria brassicicola endornavirus isolate 1 NC... | (10291) | -----      | -----      | -----      | -----         | -----     | -----     | -----      | -----          | -----                            |

## SARS-CoV-2 &amp; Alternaria brassicicola endornavirus.apr

|                                                      |         |                                                                                    |       |       |       |       |       |       |             |
|------------------------------------------------------|---------|------------------------------------------------------------------------------------|-------|-------|-------|-------|-------|-------|-------------|
|                                                      |         | Section 141                                                                        |       |       |       |       |       |       |             |
|                                                      | (11201) | 11201                                                                              | 11210 | 11220 | 11230 | 11240 | 11250 | 11260 | 11270 11280 |
| SARS-CoV-2 Reference Genome NC_045512.2              | (10841) | GATATGTGTGCTTCATTAAAAGAATTACTGCAAAATGGTATGAATGGACGTACCATATTGGGTAGTGCTTTATTAGAAGA   |       |       |       |       |       |       |             |
| Alternaria brassicicola endornavirus isolate 1 NC... | (10291) | -----                                                                              |       |       |       |       |       |       |             |
|                                                      |         | Section 142                                                                        |       |       |       |       |       |       |             |
|                                                      | (11281) | 11281                                                                              | 11290 | 11300 | 11310 | 11320 | 11330 | 11340 | 11350 11360 |
| SARS-CoV-2 Reference Genome NC_045512.2              | (10921) | TGAATTTACACCTTTTGTGATGTTGTTAGACAATGCTCAGGTGTTACTTTCCAAAGTGCAGTGAAAAGAACAATCAAGGGTA |       |       |       |       |       |       |             |
| Alternaria brassicicola endornavirus isolate 1 NC... | (10291) | -----                                                                              |       |       |       |       |       |       |             |
|                                                      |         | Section 143                                                                        |       |       |       |       |       |       |             |
|                                                      | (11361) | 11361                                                                              | 11370 | 11380 | 11390 | 11400 | 11410 | 11420 | 11430 11440 |
| SARS-CoV-2 Reference Genome NC_045512.2              | (11001) | CACACCACTGGTTGTTACTCACAAATTTGACTTCACCTTTAGTTTTAGTCCAGAGTACTCAATGGTCTTTGTTCTTTTTT   |       |       |       |       |       |       |             |
| Alternaria brassicicola endornavirus isolate 1 NC... | (10291) | -----                                                                              |       |       |       |       |       |       |             |
|                                                      |         | Section 144                                                                        |       |       |       |       |       |       |             |
|                                                      | (11441) | 11441                                                                              | 11450 | 11460 | 11470 | 11480 | 11490 | 11500 | 11510 11520 |
| SARS-CoV-2 Reference Genome NC_045512.2              | (11081) | TTGTATGAAAATGCCTTTTTACCTTTTGCTATGGGTATTATTGCTATGTCTGCTTTTGCAATGATGTTTGTCAAACATAA   |       |       |       |       |       |       |             |
| Alternaria brassicicola endornavirus isolate 1 NC... | (10291) | -----                                                                              |       |       |       |       |       |       |             |
|                                                      |         | Section 145                                                                        |       |       |       |       |       |       |             |
|                                                      | (11521) | 11521                                                                              | 11530 | 11540 | 11550 | 11560 | 11570 | 11580 | 11590 11600 |
| SARS-CoV-2 Reference Genome NC_045512.2              | (11161) | GCATGCATTTCTCTGTTTGTGTTTGTACCTTCTCTTGCCACTGTAGCTTATTTTAATATGGTCTATATGCCTGCTAGTT    |       |       |       |       |       |       |             |
| Alternaria brassicicola endornavirus isolate 1 NC... | (10291) | -----                                                                              |       |       |       |       |       |       |             |
|                                                      |         | Section 146                                                                        |       |       |       |       |       |       |             |
|                                                      | (11601) | 11601                                                                              | 11610 | 11620 | 11630 | 11640 | 11650 | 11660 | 11670 11680 |
| SARS-CoV-2 Reference Genome NC_045512.2              | (11241) | GGGTGATGCGTATTATGACATGGTTGGATATGGTTGATACTAGTTTGTCTGGTTTTAAGCTAAAAGACTGTGTTATGTAT   |       |       |       |       |       |       |             |
| Alternaria brassicicola endornavirus isolate 1 NC... | (10291) | -----                                                                              |       |       |       |       |       |       |             |
|                                                      |         | Section 147                                                                        |       |       |       |       |       |       |             |
|                                                      | (11681) | 11681                                                                              | 11690 | 11700 | 11710 | 11720 | 11730 | 11740 | 11750 11760 |
| SARS-CoV-2 Reference Genome NC_045512.2              | (11321) | GCATCAGCTGTAGTGTTACTAATCCTTATGACAGCAAGAACTGTGTATGATGATGGTGCTAGGAGAGTGTGGACACTTAT   |       |       |       |       |       |       |             |
| Alternaria brassicicola endornavirus isolate 1 NC... | (10291) | -----                                                                              |       |       |       |       |       |       |             |

## SARS-CoV-2 &amp; Alternaria brassicicola endornavirus.apr

|                                                      |         |                                                                                   |       |       |       |       |       |       |       |             |
|------------------------------------------------------|---------|-----------------------------------------------------------------------------------|-------|-------|-------|-------|-------|-------|-------|-------------|
|                                                      |         |                                                                                   |       |       |       |       |       |       |       | Section 148 |
|                                                      | (11761) | 11761                                                                             | 11770 | 11780 | 11790 | 11800 | 11810 | 11820 | 11830 | 11840       |
| SARS-CoV-2 Reference Genome NC_045512.2              | (11401) | GAATGTCTTGACACTCGTTTATAAAGTTTATTATGGTAATGCTTTAGATCAAGCCATTTCATGTGGGCTCTTATAATCT   |       |       |       |       |       |       |       |             |
| Alternaria brassicicola endornavirus isolate 1 NC... | (10291) | -----                                                                             |       |       |       |       |       |       |       |             |
|                                                      |         |                                                                                   |       |       |       |       |       |       |       | Section 149 |
|                                                      | (11841) | 11841                                                                             | 11850 | 11860 | 11870 | 11880 | 11890 | 11900 | 11910 | 11920       |
| SARS-CoV-2 Reference Genome NC_045512.2              | (11481) | CTGTTACTTCTAACTACTCAGGTGTAGTTACAACCTGTCATGTTTTTGGCCAGAGGTATTGTTTTTATGTGTGTTGAGTAT |       |       |       |       |       |       |       |             |
| Alternaria brassicicola endornavirus isolate 1 NC... | (10291) | -----                                                                             |       |       |       |       |       |       |       |             |
|                                                      |         |                                                                                   |       |       |       |       |       |       |       | Section 150 |
|                                                      | (11921) | 11921                                                                             | 11930 | 11940 | 11950 | 11960 | 11970 | 11980 | 11990 | 12000       |
| SARS-CoV-2 Reference Genome NC_045512.2              | (11561) | TGCCCTATTTTCTTCATAACTGGTAATACACTTCAGTGATAATGCTAGTTTATTGTTTCTTAGGCTATTTTGTACTTG    |       |       |       |       |       |       |       |             |
| Alternaria brassicicola endornavirus isolate 1 NC... | (10291) | -----                                                                             |       |       |       |       |       |       |       |             |
|                                                      |         |                                                                                   |       |       |       |       |       |       |       | Section 151 |
|                                                      | (12001) | 12001                                                                             | 12010 | 12020 | 12030 | 12040 | 12050 | 12060 | 12070 | 12080       |
| SARS-CoV-2 Reference Genome NC_045512.2              | (11641) | TTACTTTGGCCTCTTTTGTCTTACTCAACCGCTACTTTAGACTGACTCTTGGTGTTTATGATTACTTAGTTTCTACACAGG |       |       |       |       |       |       |       |             |
| Alternaria brassicicola endornavirus isolate 1 NC... | (10291) | -----                                                                             |       |       |       |       |       |       |       |             |
|                                                      |         |                                                                                   |       |       |       |       |       |       |       | Section 152 |
|                                                      | (12081) | 12081                                                                             | 12090 | 12100 | 12110 | 12120 | 12130 | 12140 | 12150 | 12160       |
| SARS-CoV-2 Reference Genome NC_045512.2              | (11721) | AGTTTAGATATATGAATTCACAGGGACTACTCCCAACCAAGAATAGCATAGATGCCTTCAAACCTCAACATTAAATTGTTG |       |       |       |       |       |       |       |             |
| Alternaria brassicicola endornavirus isolate 1 NC... | (10291) | -----                                                                             |       |       |       |       |       |       |       |             |
|                                                      |         |                                                                                   |       |       |       |       |       |       |       | Section 153 |
|                                                      | (12161) | 12161                                                                             | 12170 | 12180 | 12190 | 12200 | 12210 | 12220 | 12230 | 12240       |
| SARS-CoV-2 Reference Genome NC_045512.2              | (11801) | GGTGTTGGTGGCAAACCTTGTATCAAAGTAGCCACTGTACAGTCTAAAATGTCAGATGTAAAGTGCACATCAGTAGTCTT  |       |       |       |       |       |       |       |             |
| Alternaria brassicicola endornavirus isolate 1 NC... | (10291) | -----                                                                             |       |       |       |       |       |       |       |             |
|                                                      |         |                                                                                   |       |       |       |       |       |       |       | Section 154 |
|                                                      | (12241) | 12241                                                                             | 12250 | 12260 | 12270 | 12280 | 12290 | 12300 | 12310 | 12320       |
| SARS-CoV-2 Reference Genome NC_045512.2              | (11881) | ACTCTCAGTTTTGCAACAACCTCAGAGTAGAATCATCATCTAAATTGTGGGCTCAATGTGTCCAGTTACACAATGACATTC |       |       |       |       |       |       |       |             |
| Alternaria brassicicola endornavirus isolate 1 NC... | (10291) | -----                                                                             |       |       |       |       |       |       |       |             |

## SARS-CoV-2 &amp; Alternaria brassicicola endornavirus.apr

|                                                              |                                                                                   |       |       |       |       |       |       |       |       |
|--------------------------------------------------------------|-----------------------------------------------------------------------------------|-------|-------|-------|-------|-------|-------|-------|-------|
| Section 155                                                  |                                                                                   |       |       |       |       |       |       |       |       |
| (12321)                                                      | 12321                                                                             | 12330 | 12340 | 12350 | 12360 | 12370 | 12380 | 12390 | 12400 |
| SARS-CoV-2 Reference Genome NC_045512.2 (11961)              | TCTTAGCTAAAGATACTACTGAAGCCTTTGAAAAAATGGTTTCACTACTTTCTGTTTTGCTTTCCATGCAGGGTGCTGTA  |       |       |       |       |       |       |       |       |
| Alternaria brassicicola endornavirus isolate 1 NC... (10291) | -----                                                                             |       |       |       |       |       |       |       |       |
| Section 156                                                  |                                                                                   |       |       |       |       |       |       |       |       |
| (12401)                                                      | 12401                                                                             | 12410 | 12420 | 12430 | 12440 | 12450 | 12460 | 12470 | 12480 |
| SARS-CoV-2 Reference Genome NC_045512.2 (12041)              | GACATAAACCAAGCTTTGTGAAGAAATGCTGGACAACAGGGCAACCTTACAAGCTATAGCCTCAGAGTTTAGTTCCCTTCC |       |       |       |       |       |       |       |       |
| Alternaria brassicicola endornavirus isolate 1 NC... (10291) | -----                                                                             |       |       |       |       |       |       |       |       |
| Section 157                                                  |                                                                                   |       |       |       |       |       |       |       |       |
| (12481)                                                      | 12481                                                                             | 12490 | 12500 | 12510 | 12520 | 12530 | 12540 | 12550 | 12560 |
| SARS-CoV-2 Reference Genome NC_045512.2 (12121)              | ATCATATGCAGCTTTTGCTACTGCTCAAGAAGCTTATGAGCAGGCTGTTGCTAATGGTGATTCTGAAGTTGTTCTTAAAA  |       |       |       |       |       |       |       |       |
| Alternaria brassicicola endornavirus isolate 1 NC... (10291) | -----                                                                             |       |       |       |       |       |       |       |       |
| Section 158                                                  |                                                                                   |       |       |       |       |       |       |       |       |
| (12561)                                                      | 12561                                                                             | 12570 | 12580 | 12590 | 12600 | 12610 | 12620 | 12630 | 12640 |
| SARS-CoV-2 Reference Genome NC_045512.2 (12201)              | AGTTGAAGAAGTCTTTGAATGTGGCTAAATCTGAATTTGACCGTGATGCAGCCATGCAACGTAAGTTGGAAAAGATGGCT  |       |       |       |       |       |       |       |       |
| Alternaria brassicicola endornavirus isolate 1 NC... (10291) | -----                                                                             |       |       |       |       |       |       |       |       |
| Section 159                                                  |                                                                                   |       |       |       |       |       |       |       |       |
| (12641)                                                      | 12641                                                                             | 12650 | 12660 | 12670 | 12680 | 12690 | 12700 | 12710 | 12720 |
| SARS-CoV-2 Reference Genome NC_045512.2 (12281)              | GATCAAGCTATGACCCAAATGTATAAACAGGCTAGATCTGAGGACAAGAGGGCAAAAGTTACTAGTGCTATGCAGACAAT  |       |       |       |       |       |       |       |       |
| Alternaria brassicicola endornavirus isolate 1 NC... (10291) | -----                                                                             |       |       |       |       |       |       |       |       |
| Section 160                                                  |                                                                                   |       |       |       |       |       |       |       |       |
| (12721)                                                      | 12721                                                                             | 12730 | 12740 | 12750 | 12760 | 12770 | 12780 | 12790 | 12800 |
| SARS-CoV-2 Reference Genome NC_045512.2 (12361)              | GCTTTTCACTATGCTTAGAAAGTTGGATAATGATGCACTCAACAACATTATCAACAATGCAAGAGATGGTTGTGTTCCCT  |       |       |       |       |       |       |       |       |
| Alternaria brassicicola endornavirus isolate 1 NC... (10291) | -----                                                                             |       |       |       |       |       |       |       |       |
| Section 161                                                  |                                                                                   |       |       |       |       |       |       |       |       |
| (12801)                                                      | 12801                                                                             | 12810 | 12820 | 12830 | 12840 | 12850 | 12860 | 12870 | 12880 |
| SARS-CoV-2 Reference Genome NC_045512.2 (12441)              | TGAACATAATACCTCTTACAACAGCAGCCAACTAATGGTTGTCATACCAGACTATAACACATATAAAAAATACGTGTGAT  |       |       |       |       |       |       |       |       |
| Alternaria brassicicola endornavirus isolate 1 NC... (10291) | -----                                                                             |       |       |       |       |       |       |       |       |

## SARS-CoV-2 &amp; Alternaria brassicicola endornavirus.apr

|                                                      |         |                                                                                    |       |       |       |       |       |       |             |
|------------------------------------------------------|---------|------------------------------------------------------------------------------------|-------|-------|-------|-------|-------|-------|-------------|
|                                                      |         | Section 162                                                                        |       |       |       |       |       |       |             |
|                                                      | (12881) | 12881                                                                              | 12890 | 12900 | 12910 | 12920 | 12930 | 12940 | 12950 12960 |
| SARS-CoV-2 Reference Genome NC_045512.2              | (12521) | GGTACAACATTTACTTATGCATCAGCATTGTGGGAAATCCAACAGGTTGTAGATGCAGATAGTAAAATTGTTCAACTTAG   |       |       |       |       |       |       |             |
| Alternaria brassicicola endornavirus isolate 1 NC... | (10291) | -----                                                                              |       |       |       |       |       |       |             |
|                                                      |         | Section 163                                                                        |       |       |       |       |       |       |             |
|                                                      | (12961) | 12961                                                                              | 12970 | 12980 | 12990 | 13000 | 13010 | 13020 | 13030 13040 |
| SARS-CoV-2 Reference Genome NC_045512.2              | (12601) | TGAAATTAGTATGGACAATTCACCTAATTTAGCATGGCCTCTTATTGTAACAGCTTTAAGGGCCAATTCTGCTGTCAAAAT  |       |       |       |       |       |       |             |
| Alternaria brassicicola endornavirus isolate 1 NC... | (10291) | -----                                                                              |       |       |       |       |       |       |             |
|                                                      |         | Section 164                                                                        |       |       |       |       |       |       |             |
|                                                      | (13041) | 13041                                                                              | 13050 | 13060 | 13070 | 13080 | 13090 | 13100 | 13110 13120 |
| SARS-CoV-2 Reference Genome NC_045512.2              | (12681) | TACAGAATAATGAGCTTAGTCCTGTTGCACTACGACAGATGTCTTGTGCTGCCGGTACTACACAACTGCTTGCCTGAT     |       |       |       |       |       |       |             |
| Alternaria brassicicola endornavirus isolate 1 NC... | (10291) | -----                                                                              |       |       |       |       |       |       |             |
|                                                      |         | Section 165                                                                        |       |       |       |       |       |       |             |
|                                                      | (13121) | 13121                                                                              | 13130 | 13140 | 13150 | 13160 | 13170 | 13180 | 13190 13200 |
| SARS-CoV-2 Reference Genome NC_045512.2              | (12761) | GACAATGCGTTAGCTTACTACAACACAACAAAGGGAGGTAGGTTTGTACTTGCCTGTTATCCGATTTACAGGATTTGAA    |       |       |       |       |       |       |             |
| Alternaria brassicicola endornavirus isolate 1 NC... | (10291) | -----                                                                              |       |       |       |       |       |       |             |
|                                                      |         | Section 166                                                                        |       |       |       |       |       |       |             |
|                                                      | (13201) | 13201                                                                              | 13210 | 13220 | 13230 | 13240 | 13250 | 13260 | 13270 13280 |
| SARS-CoV-2 Reference Genome NC_045512.2              | (12841) | ATGGGCTAGATTCCCTAAGAGTGATGGAAGTGGTACTATCTATACAGAACTGGAACACCTTGTAGGTTTGTACAGACA     |       |       |       |       |       |       |             |
| Alternaria brassicicola endornavirus isolate 1 NC... | (10291) | -----                                                                              |       |       |       |       |       |       |             |
|                                                      |         | Section 167                                                                        |       |       |       |       |       |       |             |
|                                                      | (13281) | 13281                                                                              | 13290 | 13300 | 13310 | 13320 | 13330 | 13340 | 13350 13360 |
| SARS-CoV-2 Reference Genome NC_045512.2              | (12921) | CACCTAAAGGTCCTAAAGTGAAGTATTTATACTTTATTAAAGGATTAAACAACCTAAATAGAGGTATGGTACTTGGTAGT   |       |       |       |       |       |       |             |
| Alternaria brassicicola endornavirus isolate 1 NC... | (10291) | -----                                                                              |       |       |       |       |       |       |             |
|                                                      |         | Section 168                                                                        |       |       |       |       |       |       |             |
|                                                      | (13361) | 13361                                                                              | 13370 | 13380 | 13390 | 13400 | 13410 | 13420 | 13430 13440 |
| SARS-CoV-2 Reference Genome NC_045512.2              | (13001) | TTAGCTGCCACAGTACGTCTACAAGCTGGTAATGCAACAGAAAGTGCCCTGCCAATTCAACTGTATTATCTTTCTGTGCTTT |       |       |       |       |       |       |             |
| Alternaria brassicicola endornavirus isolate 1 NC... | (10291) | -----                                                                              |       |       |       |       |       |       |             |



## SARS-CoV-2 &amp; Alternaria brassicicola endornavirus.apr

|                                                      |         |                                                                                   |       |       |       |       |       |       |             |
|------------------------------------------------------|---------|-----------------------------------------------------------------------------------|-------|-------|-------|-------|-------|-------|-------------|
|                                                      |         | Section 169                                                                       |       |       |       |       |       |       |             |
|                                                      | (13441) | 13441                                                                             | 13450 | 13460 | 13470 | 13480 | 13490 | 13500 | 13510 13520 |
| SARS-CoV-2 Reference Genome NC_045512.2              | (13081) | TGCTGTAGATGCTGCTAAAGCTTACAAAGATTATCTAGCTAGTGGGGGACAACCAATCACTAATTGTGTTAAGATGTTGT  |       |       |       |       |       |       |             |
| Alternaria brassicicola endornavirus isolate 1 NC... | (10291) | -----                                                                             |       |       |       |       |       |       |             |
|                                                      |         | Section 170                                                                       |       |       |       |       |       |       |             |
|                                                      | (13521) | 13521                                                                             | 13530 | 13540 | 13550 | 13560 | 13570 | 13580 | 13590 13600 |
| SARS-CoV-2 Reference Genome NC_045512.2              | (13161) | GTACACACACTGGTACTGGTCAGGCAATAACAGTTACACCGGAAGCCAATATGGATCAAGAATCCTTTGGTGGTGCATCG  |       |       |       |       |       |       |             |
| Alternaria brassicicola endornavirus isolate 1 NC... | (10291) | -----                                                                             |       |       |       |       |       |       |             |
|                                                      |         | Section 171                                                                       |       |       |       |       |       |       |             |
|                                                      | (13601) | 13601                                                                             | 13610 | 13620 | 13630 | 13640 | 13650 | 13660 | 13670 13680 |
| SARS-CoV-2 Reference Genome NC_045512.2              | (13241) | TGTTGTCTGTACTGCCGTTGCCACATAGATCATCCAAATCCTAAAGGATTTTGTGACTTAAAAGGTAAGTATGTACAAAT  |       |       |       |       |       |       |             |
| Alternaria brassicicola endornavirus isolate 1 NC... | (10291) | -----                                                                             |       |       |       |       |       |       |             |
|                                                      |         | Section 172                                                                       |       |       |       |       |       |       |             |
|                                                      | (13681) | 13681                                                                             | 13690 | 13700 | 13710 | 13720 | 13730 | 13740 | 13750 13760 |
| SARS-CoV-2 Reference Genome NC_045512.2              | (13321) | ACCTACAACCTTGTGCTAATGACCCTGTGGGTTTTACACTTAAAAACACAGTCTGTACCGTCTGCGGTATGTGGAAAGGTT |       |       |       |       |       |       |             |
| Alternaria brassicicola endornavirus isolate 1 NC... | (10291) | -----                                                                             |       |       |       |       |       |       |             |
|                                                      |         | Section 173                                                                       |       |       |       |       |       |       |             |
|                                                      | (13761) | 13761                                                                             | 13770 | 13780 | 13790 | 13800 | 13810 | 13820 | 13830 13840 |
| SARS-CoV-2 Reference Genome NC_045512.2              | (13401) | ATGGCTGTAGTTGTGATCAACTCCGCGAACCCATGCTTCAGTCAGCTGATGCACAATCGTTTTTAAACGGGTTTGC      |       |       |       |       |       |       |             |
| Alternaria brassicicola endornavirus isolate 1 NC... | (10291) | -----                                                                             |       |       |       |       |       |       |             |
|                                                      |         | Section 174                                                                       |       |       |       |       |       |       |             |
|                                                      | (13841) | 13841                                                                             | 13850 | 13860 | 13870 | 13880 | 13890 | 13900 | 13910 13920 |
| SARS-CoV-2 Reference Genome NC_045512.2              | (13481) | TAAGTGCAGCCCGTCTTACACCGTGCGGCACAGGCACTAGTACTGATGTCGTATACAGGGCTTTTGACATCTACAATGAT  |       |       |       |       |       |       |             |
| Alternaria brassicicola endornavirus isolate 1 NC... | (10291) | -----                                                                             |       |       |       |       |       |       |             |
|                                                      |         | Section 175                                                                       |       |       |       |       |       |       |             |
|                                                      | (13921) | 13921                                                                             | 13930 | 13940 | 13950 | 13960 | 13970 | 13980 | 13990 14000 |
| SARS-CoV-2 Reference Genome NC_045512.2              | (13561) | AAAGTAGCTGGTTTTGCTAAATTCTAAAACTAATTGTTGTCGCTTCCAAGAAAAGGACGAAGATGACAATTTAATTGA    |       |       |       |       |       |       |             |
| Alternaria brassicicola endornavirus isolate 1 NC... | (10291) | -----                                                                             |       |       |       |       |       |       |             |

## SARS-CoV-2 &amp; Alternaria brassicicola endornavirus.apr

|                                                      |         |                                                                                   |                       |                       |                       |                       |                       |                       |                       |                       |
|------------------------------------------------------|---------|-----------------------------------------------------------------------------------|-----------------------|-----------------------|-----------------------|-----------------------|-----------------------|-----------------------|-----------------------|-----------------------|
|                                                      |         |                                                                                   |                       |                       |                       |                       |                       |                       |                       | Section 176           |
|                                                      | (14001) | <a href="#">14001</a>                                                             | <a href="#">14010</a> | <a href="#">14020</a> | <a href="#">14030</a> | <a href="#">14040</a> | <a href="#">14050</a> | <a href="#">14060</a> | <a href="#">14070</a> | <a href="#">14080</a> |
| SARS-CoV-2 Reference Genome NC_045512.2              | (13641) | TTCTTACTTTGTAGTTAAGAGACACACTTTCTCTAACTACCAACATGAAGAAACAATTTATAATTTACTTAAGGATTGTC  |                       |                       |                       |                       |                       |                       |                       |                       |
| Alternaria brassicicola endornavirus isolate 1 NC... | (10291) | -----                                                                             |                       |                       |                       |                       |                       |                       |                       |                       |
|                                                      |         |                                                                                   |                       |                       |                       |                       |                       |                       |                       | Section 177           |
|                                                      | (14081) | <a href="#">14081</a>                                                             | <a href="#">14090</a> | <a href="#">14100</a> | <a href="#">14110</a> | <a href="#">14120</a> | <a href="#">14130</a> | <a href="#">14140</a> | <a href="#">14150</a> | <a href="#">14160</a> |
| SARS-CoV-2 Reference Genome NC_045512.2              | (13721) | CAGCTGTTGCTAAACATGACTTCTTTAAGTTTAGAATAGACGGTGACATGGTACCACATATATCACGTCAACGTCTTACT  |                       |                       |                       |                       |                       |                       |                       |                       |
| Alternaria brassicicola endornavirus isolate 1 NC... | (10291) | -----                                                                             |                       |                       |                       |                       |                       |                       |                       |                       |
|                                                      |         |                                                                                   |                       |                       |                       |                       |                       |                       |                       | Section 178           |
|                                                      | (14161) | <a href="#">14161</a>                                                             | <a href="#">14170</a> | <a href="#">14180</a> | <a href="#">14190</a> | <a href="#">14200</a> | <a href="#">14210</a> | <a href="#">14220</a> | <a href="#">14230</a> | <a href="#">14240</a> |
| SARS-CoV-2 Reference Genome NC_045512.2              | (13801) | AAATACACAATGGCAGACCTCGTCTATGCTTTAAGGCATTTTGATGAAGGTAATTGTGACACATTAAAGAAATACTTGT   |                       |                       |                       |                       |                       |                       |                       |                       |
| Alternaria brassicicola endornavirus isolate 1 NC... | (10291) | -----                                                                             |                       |                       |                       |                       |                       |                       |                       |                       |
|                                                      |         |                                                                                   |                       |                       |                       |                       |                       |                       |                       | Section 179           |
|                                                      | (14241) | <a href="#">14241</a>                                                             | <a href="#">14250</a> | <a href="#">14260</a> | <a href="#">14270</a> | <a href="#">14280</a> | <a href="#">14290</a> | <a href="#">14300</a> | <a href="#">14310</a> | <a href="#">14320</a> |
| SARS-CoV-2 Reference Genome NC_045512.2              | (13881) | CACATACAATTGTTGTGATGATGATTATTTCAATAAAAAGGACTGGTATGATTTTGTAGAAAACCCAGATATATTACGCG  |                       |                       |                       |                       |                       |                       |                       |                       |
| Alternaria brassicicola endornavirus isolate 1 NC... | (10291) | -----                                                                             |                       |                       |                       |                       |                       |                       |                       |                       |
|                                                      |         |                                                                                   |                       |                       |                       |                       |                       |                       |                       | Section 180           |
|                                                      | (14321) | <a href="#">14321</a>                                                             | <a href="#">14330</a> | <a href="#">14340</a> | <a href="#">14350</a> | <a href="#">14360</a> | <a href="#">14370</a> | <a href="#">14380</a> | <a href="#">14390</a> | <a href="#">14400</a> |
| SARS-CoV-2 Reference Genome NC_045512.2              | (13961) | TATACGCCAACTTAGGTGAACGTGTACGCCAAGCTTTGTTAAAAACAGTACAATTCTGTGATGCCATGCGAAATGCTGGT  |                       |                       |                       |                       |                       |                       |                       |                       |
| Alternaria brassicicola endornavirus isolate 1 NC... | (10291) | -----                                                                             |                       |                       |                       |                       |                       |                       |                       |                       |
|                                                      |         |                                                                                   |                       |                       |                       |                       |                       |                       |                       | Section 181           |
|                                                      | (14401) | <a href="#">14401</a>                                                             | <a href="#">14410</a> | <a href="#">14420</a> | <a href="#">14430</a> | <a href="#">14440</a> | <a href="#">14450</a> | <a href="#">14460</a> | <a href="#">14470</a> | <a href="#">14480</a> |
| SARS-CoV-2 Reference Genome NC_045512.2              | (14041) | ATTGTTGGTGTACTGACATTAGATAATCAAGATCTCAATGGTAACTGGTATGATTTGCGTGATTTTCATACAAACCACGCC |                       |                       |                       |                       |                       |                       |                       |                       |
| Alternaria brassicicola endornavirus isolate 1 NC... | (10291) | -----                                                                             |                       |                       |                       |                       |                       |                       |                       |                       |
|                                                      |         |                                                                                   |                       |                       |                       |                       |                       |                       |                       | Section 182           |
|                                                      | (14481) | <a href="#">14481</a>                                                             | <a href="#">14490</a> | <a href="#">14500</a> | <a href="#">14510</a> | <a href="#">14520</a> | <a href="#">14530</a> | <a href="#">14540</a> | <a href="#">14550</a> | <a href="#">14560</a> |
| SARS-CoV-2 Reference Genome NC_045512.2              | (14121) | AGGTAGTGGAGTTCTGTTGTAGATTCTTATTATTTCATTGTTAATGCCTATATTAACCTTGACCAGGGCTTTAACTGCAG  |                       |                       |                       |                       |                       |                       |                       |                       |
| Alternaria brassicicola endornavirus isolate 1 NC... | (10291) | -----                                                                             |                       |                       |                       |                       |                       |                       |                       |                       |

## SARS-CoV-2 &amp; Alternaria brassicicola endornavirus.apr

|                                                              |                                                                                   |       |       |       |       |       |       |       |       |
|--------------------------------------------------------------|-----------------------------------------------------------------------------------|-------|-------|-------|-------|-------|-------|-------|-------|
| Section 183                                                  |                                                                                   |       |       |       |       |       |       |       |       |
| (14561)                                                      | 14561                                                                             | 14570 | 14580 | 14590 | 14600 | 14610 | 14620 | 14630 | 14640 |
| SARS-CoV-2 Reference Genome NC_045512.2 (14201)              | AGTCACATGTTGACACTGACTTAAACAAAGCCTTACATTAAGTGGGATTTGTTAAAATATGACTTCACGGAAGAGAGGTTA |       |       |       |       |       |       |       |       |
| Alternaria brassicicola endornavirus isolate 1 NC... (10291) | -----                                                                             |       |       |       |       |       |       |       |       |
| Section 184                                                  |                                                                                   |       |       |       |       |       |       |       |       |
| (14641)                                                      | 14641                                                                             | 14650 | 14660 | 14670 | 14680 | 14690 | 14700 | 14710 | 14720 |
| SARS-CoV-2 Reference Genome NC_045512.2 (14281)              | AAACTCTTTGACCGTTATTTTAAATATTGGGATCAGACATACCACCCAAATTGTGTAACTGTTTGGATGACAGATGCAT   |       |       |       |       |       |       |       |       |
| Alternaria brassicicola endornavirus isolate 1 NC... (10291) | -----                                                                             |       |       |       |       |       |       |       |       |
| Section 185                                                  |                                                                                   |       |       |       |       |       |       |       |       |
| (14721)                                                      | 14721                                                                             | 14730 | 14740 | 14750 | 14760 | 14770 | 14780 | 14790 | 14800 |
| SARS-CoV-2 Reference Genome NC_045512.2 (14361)              | TCTGCATTGTGCAAACCTTTAATGTTTTATTCTCTACAGTGTTCACCTACAAGTTTTGGACCACTAGTGAGAAAAATAT   |       |       |       |       |       |       |       |       |
| Alternaria brassicicola endornavirus isolate 1 NC... (10291) | -----                                                                             |       |       |       |       |       |       |       |       |
| Section 186                                                  |                                                                                   |       |       |       |       |       |       |       |       |
| (14801)                                                      | 14801                                                                             | 14810 | 14820 | 14830 | 14840 | 14850 | 14860 | 14870 | 14880 |
| SARS-CoV-2 Reference Genome NC_045512.2 (14441)              | TTGTTGATGGTGTTCATTTGTAGTTTCAACTGGATACCACTTCAGAGAGCTAGGTGTTGTACATAATCAGGATGTAAAC   |       |       |       |       |       |       |       |       |
| Alternaria brassicicola endornavirus isolate 1 NC... (10291) | -----                                                                             |       |       |       |       |       |       |       |       |
| Section 187                                                  |                                                                                   |       |       |       |       |       |       |       |       |
| (14881)                                                      | 14881                                                                             | 14890 | 14900 | 14910 | 14920 | 14930 | 14940 | 14950 | 14960 |
| SARS-CoV-2 Reference Genome NC_045512.2 (14521)              | TTACATAGCTCTAGACTTAGTTTTAAGGAATTACTTGTGTATGCTGCTGACCTGCTATGCACGCTGCTTCTGGTAATCT   |       |       |       |       |       |       |       |       |
| Alternaria brassicicola endornavirus isolate 1 NC... (10291) | -----                                                                             |       |       |       |       |       |       |       |       |
| Section 188                                                  |                                                                                   |       |       |       |       |       |       |       |       |
| (14961)                                                      | 14961                                                                             | 14970 | 14980 | 14990 | 15000 | 15010 | 15020 | 15030 | 15040 |
| SARS-CoV-2 Reference Genome NC_045512.2 (14601)              | ATTACTAGATAAACGCACTACGTGCTTTTCAGTAGCTGCACTTACTAACAATGTTGCTTTTCAAACGTCAAACCCGGTA   |       |       |       |       |       |       |       |       |
| Alternaria brassicicola endornavirus isolate 1 NC... (10291) | -----                                                                             |       |       |       |       |       |       |       |       |
| Section 189                                                  |                                                                                   |       |       |       |       |       |       |       |       |
| (15041)                                                      | 15041                                                                             | 15050 | 15060 | 15070 | 15080 | 15090 | 15100 | 15110 | 15120 |
| SARS-CoV-2 Reference Genome NC_045512.2 (14681)              | ATTTTAACAAAGACTTCTATGACTTTGCTGTGTCTAAGGGTTTCTTTAAGGAAGGAAGTTCTGTTGAATTAAACACTTC   |       |       |       |       |       |       |       |       |
| Alternaria brassicicola endornavirus isolate 1 NC... (10291) | -----                                                                             |       |       |       |       |       |       |       |       |

## SARS-CoV-2 &amp; Alternaria brassicicola endornavirus.apr

|                                                              |                                                                                  |       |       |       |       |       |       |       |       |
|--------------------------------------------------------------|----------------------------------------------------------------------------------|-------|-------|-------|-------|-------|-------|-------|-------|
| Section 190                                                  |                                                                                  |       |       |       |       |       |       |       |       |
| (15121)                                                      | 15121                                                                            | 15130 | 15140 | 15150 | 15160 | 15170 | 15180 | 15190 | 15200 |
| SARS-CoV-2 Reference Genome NC_045512.2 (14761)              | TTCTTTGCTCAGGATGGTAATGCTGCTATCAGCGATTATGACTACTATCGTTATAATCTACCAACAATGTGTGATATCAG |       |       |       |       |       |       |       |       |
| Alternaria brassicicola endornavirus isolate 1 NC... (10291) | -----                                                                            |       |       |       |       |       |       |       |       |
| Section 191                                                  |                                                                                  |       |       |       |       |       |       |       |       |
| (15201)                                                      | 15201                                                                            | 15210 | 15220 | 15230 | 15240 | 15250 | 15260 | 15270 | 15280 |
| SARS-CoV-2 Reference Genome NC_045512.2 (14841)              | ACAACTACTATTTGTAGTTGAAGTTGTTGATAAGTACTTTGATTGTTACGATGGTGGCTGTATTAATGCTAACCAAGTCA |       |       |       |       |       |       |       |       |
| Alternaria brassicicola endornavirus isolate 1 NC... (10291) | -----                                                                            |       |       |       |       |       |       |       |       |
| Section 192                                                  |                                                                                  |       |       |       |       |       |       |       |       |
| (15281)                                                      | 15281                                                                            | 15290 | 15300 | 15310 | 15320 | 15330 | 15340 | 15350 | 15360 |
| SARS-CoV-2 Reference Genome NC_045512.2 (14921)              | TCGTCAACAACCTAGACAAATCAGCTGGTTTTCCATTTAATAAATGGGGTAAGGCTAGACTTTATTATGATTCAATGAGT |       |       |       |       |       |       |       |       |
| Alternaria brassicicola endornavirus isolate 1 NC... (10291) | -----                                                                            |       |       |       |       |       |       |       |       |
| Section 193                                                  |                                                                                  |       |       |       |       |       |       |       |       |
| (15361)                                                      | 15361                                                                            | 15370 | 15380 | 15390 | 15400 | 15410 | 15420 | 15430 | 15440 |
| SARS-CoV-2 Reference Genome NC_045512.2 (15001)              | TATGAGGATCAAGATGCACTTTTCGCATATACAAAACGTAATGTCATCCCTACTATAACTCAAATGAATCTTAAGTATGC |       |       |       |       |       |       |       |       |
| Alternaria brassicicola endornavirus isolate 1 NC... (10291) | -----                                                                            |       |       |       |       |       |       |       |       |
| Section 194                                                  |                                                                                  |       |       |       |       |       |       |       |       |
| (15441)                                                      | 15441                                                                            | 15450 | 15460 | 15470 | 15480 | 15490 | 15500 | 15510 | 15520 |
| SARS-CoV-2 Reference Genome NC_045512.2 (15081)              | CATTAGTGCAAAGAATAGAGCTCGCACCGTAGCTGGTGTCTCTATCTGTAGTACTATGACCAATAGACAGTTTCATCAAA |       |       |       |       |       |       |       |       |
| Alternaria brassicicola endornavirus isolate 1 NC... (10291) | -----                                                                            |       |       |       |       |       |       |       |       |
| Section 195                                                  |                                                                                  |       |       |       |       |       |       |       |       |
| (15521)                                                      | 15521                                                                            | 15530 | 15540 | 15550 | 15560 | 15570 | 15580 | 15590 | 15600 |
| SARS-CoV-2 Reference Genome NC_045512.2 (15161)              | AATTATTGAAATCAATAGCCGCCACTAGAGGAGCTACTGTAGTAATTGGAACAAGCAAATTCTATGGTGGTTGGCACAAC |       |       |       |       |       |       |       |       |
| Alternaria brassicicola endornavirus isolate 1 NC... (10291) | -----                                                                            |       |       |       |       |       |       |       |       |
| Section 196                                                  |                                                                                  |       |       |       |       |       |       |       |       |
| (15601)                                                      | 15601                                                                            | 15610 | 15620 | 15630 | 15640 | 15650 | 15660 | 15670 | 15680 |
| SARS-CoV-2 Reference Genome NC_045512.2 (15241)              | ATGTTAAAACTGTTTATAGTGATGTAGAAAACCCCTCACCTTATGGGTTGGGATTATCCTAAATGTGATAGAGCCATGCC |       |       |       |       |       |       |       |       |
| Alternaria brassicicola endornavirus isolate 1 NC... (10291) | -----                                                                            |       |       |       |       |       |       |       |       |

## SARS-CoV-2 &amp; Alternaria brassicicola endornavirus.apr

|                                                      |         |                                                                                   |       |       |       |       |       |       |             |
|------------------------------------------------------|---------|-----------------------------------------------------------------------------------|-------|-------|-------|-------|-------|-------|-------------|
|                                                      |         | Section 197                                                                       |       |       |       |       |       |       |             |
|                                                      | (15681) | 15681                                                                             | 15690 | 15700 | 15710 | 15720 | 15730 | 15740 | 15750 15760 |
| SARS-CoV-2 Reference Genome NC_045512.2              | (15321) | TAACATGCTTAGAATTATGGCCTCACTTGTTCTTGCTCGCAAACATACAACGTGTTGTAGCTTGTCACACCGTTTCTATA  |       |       |       |       |       |       |             |
| Alternaria brassicicola endornavirus isolate 1 NC... | (10291) | -----                                                                             |       |       |       |       |       |       |             |
|                                                      |         | Section 198                                                                       |       |       |       |       |       |       |             |
|                                                      | (15761) | 15761                                                                             | 15770 | 15780 | 15790 | 15800 | 15810 | 15820 | 15830 15840 |
| SARS-CoV-2 Reference Genome NC_045512.2              | (15401) | GATTAGCTAATGAGTGTGCTCAAGTATTGAGTGAAATGGTCATGTGTGGCGGTTCACTATATGTTAAACCAGGTGGAACC  |       |       |       |       |       |       |             |
| Alternaria brassicicola endornavirus isolate 1 NC... | (10291) | -----                                                                             |       |       |       |       |       |       |             |
|                                                      |         | Section 199                                                                       |       |       |       |       |       |       |             |
|                                                      | (15841) | 15841                                                                             | 15850 | 15860 | 15870 | 15880 | 15890 | 15900 | 15910 15920 |
| SARS-CoV-2 Reference Genome NC_045512.2              | (15481) | TCATCAGGAGATGCCACAACCTGCTTATGCTAATAGTGTTTTTAACATTTGTCAAGCTGTCACGGCCAATGTTAATGCACT |       |       |       |       |       |       |             |
| Alternaria brassicicola endornavirus isolate 1 NC... | (10291) | -----                                                                             |       |       |       |       |       |       |             |
|                                                      |         | Section 200                                                                       |       |       |       |       |       |       |             |
|                                                      | (15921) | 15921                                                                             | 15930 | 15940 | 15950 | 15960 | 15970 | 15980 | 15990 16000 |
| SARS-CoV-2 Reference Genome NC_045512.2              | (15561) | TTTATCTACTGATGGTAACAAAATTGCCGATAAGTATGTCCGCAATTTACAACACAGACTTTATGAGTGTCTCTATAGAA  |       |       |       |       |       |       |             |
| Alternaria brassicicola endornavirus isolate 1 NC... | (10291) | -----                                                                             |       |       |       |       |       |       |             |
|                                                      |         | Section 201                                                                       |       |       |       |       |       |       |             |
|                                                      | (16001) | 16001                                                                             | 16010 | 16020 | 16030 | 16040 | 16050 | 16060 | 16070 16080 |
| SARS-CoV-2 Reference Genome NC_045512.2              | (15641) | ATAGAGATGTTGACACAGACTTTGTGAATGAGTTTTACGCATATTTGCGTAAACATTTCTCAATGATGATACTCTCTGAC  |       |       |       |       |       |       |             |
| Alternaria brassicicola endornavirus isolate 1 NC... | (10291) | -----                                                                             |       |       |       |       |       |       |             |
|                                                      |         | Section 202                                                                       |       |       |       |       |       |       |             |
|                                                      | (16081) | 16081                                                                             | 16090 | 16100 | 16110 | 16120 | 16130 | 16140 | 16150 16160 |
| SARS-CoV-2 Reference Genome NC_045512.2              | (15721) | GATGCTGTTGTGTGTTTCAATAGCACTTATGCATCTCAAGGTCTAGTGGCTAGCATAAAGAACTTTAAGTCAGTTCTTTA  |       |       |       |       |       |       |             |
| Alternaria brassicicola endornavirus isolate 1 NC... | (10291) | -----                                                                             |       |       |       |       |       |       |             |
|                                                      |         | Section 203                                                                       |       |       |       |       |       |       |             |
|                                                      | (16161) | 16161                                                                             | 16170 | 16180 | 16190 | 16200 | 16210 | 16220 | 16230 16240 |
| SARS-CoV-2 Reference Genome NC_045512.2              | (15801) | TTATCAAAACAATGTTTTTATGTCTGAAGCAAAATGTTGGACTGAGACTGACCTTACTAAAGGACCTCATGAATTTTGCT  |       |       |       |       |       |       |             |
| Alternaria brassicicola endornavirus isolate 1 NC... | (10291) | -----                                                                             |       |       |       |       |       |       |             |

## SARS-CoV-2 &amp; Alternaria brassicicola endornavirus.apr

|                                                      |         |                                                                                   |       |       |       |       |       |       |             |
|------------------------------------------------------|---------|-----------------------------------------------------------------------------------|-------|-------|-------|-------|-------|-------|-------------|
|                                                      |         | Section 204                                                                       |       |       |       |       |       |       |             |
|                                                      | (16241) | 16241                                                                             | 16250 | 16260 | 16270 | 16280 | 16290 | 16300 | 16310 16320 |
| SARS-CoV-2 Reference Genome NC_045512.2              | (15881) | CTCAACATACAATGCTAGTTAAACAGGGTGATGATTATGTGTACCTTCCTTACCCAGATCCATCAAGAATCCTAGGGGCC  |       |       |       |       |       |       |             |
| Alternaria brassicicola endornavirus isolate 1 NC... | (10291) | -----                                                                             |       |       |       |       |       |       |             |
|                                                      |         | Section 205                                                                       |       |       |       |       |       |       |             |
|                                                      | (16321) | 16321                                                                             | 16330 | 16340 | 16350 | 16360 | 16370 | 16380 | 16390 16400 |
| SARS-CoV-2 Reference Genome NC_045512.2              | (15961) | GGCTGTTTTGTAGATGATATCGTAAAAACAGATGGTACACTTATGATTGAACGGTTCGTGTCTTTAGCTATAGATGCTTA  |       |       |       |       |       |       |             |
| Alternaria brassicicola endornavirus isolate 1 NC... | (10291) | -----                                                                             |       |       |       |       |       |       |             |
|                                                      |         | Section 206                                                                       |       |       |       |       |       |       |             |
|                                                      | (16401) | 16401                                                                             | 16410 | 16420 | 16430 | 16440 | 16450 | 16460 | 16470 16480 |
| SARS-CoV-2 Reference Genome NC_045512.2              | (16041) | CCCACTTACTAAACATCCTAATCAGGAGTATGCTGATGTCTTTCATTTGTACTTACAATACATAAGAAAGCTACATGATG  |       |       |       |       |       |       |             |
| Alternaria brassicicola endornavirus isolate 1 NC... | (10291) | -----                                                                             |       |       |       |       |       |       |             |
|                                                      |         | Section 207                                                                       |       |       |       |       |       |       |             |
|                                                      | (16481) | 16481                                                                             | 16490 | 16500 | 16510 | 16520 | 16530 | 16540 | 16550 16560 |
| SARS-CoV-2 Reference Genome NC_045512.2              | (16121) | AGTTAACAGGACACATGTTAGACATGTATTCTGTTATGCTTACTAATGATAACACTTCAAGGTATTGGGAACCTGAGTTT  |       |       |       |       |       |       |             |
| Alternaria brassicicola endornavirus isolate 1 NC... | (10291) | -----                                                                             |       |       |       |       |       |       |             |
|                                                      |         | Section 208                                                                       |       |       |       |       |       |       |             |
|                                                      | (16561) | 16561                                                                             | 16570 | 16580 | 16590 | 16600 | 16610 | 16620 | 16630 16640 |
| SARS-CoV-2 Reference Genome NC_045512.2              | (16201) | TATGAGGCTATGTACACACCGCATAACAGTCTTACAGGCTGTTGGGGCTTGTGTTCTTTGCAATTCACAGACTTCATTAAG |       |       |       |       |       |       |             |
| Alternaria brassicicola endornavirus isolate 1 NC... | (10291) | -----                                                                             |       |       |       |       |       |       |             |
|                                                      |         | Section 209                                                                       |       |       |       |       |       |       |             |
|                                                      | (16641) | 16641                                                                             | 16650 | 16660 | 16670 | 16680 | 16690 | 16700 | 16710 16720 |
| SARS-CoV-2 Reference Genome NC_045512.2              | (16281) | ATGTGGTGCTTGCATACGTAGACCATTCTTATGTTGTAAATGCTGTTACGACCATGTCATATCAACATCACATAAATTAG  |       |       |       |       |       |       |             |
| Alternaria brassicicola endornavirus isolate 1 NC... | (10291) | -----                                                                             |       |       |       |       |       |       |             |
|                                                      |         | Section 210                                                                       |       |       |       |       |       |       |             |
|                                                      | (16721) | 16721                                                                             | 16730 | 16740 | 16750 | 16760 | 16770 | 16780 | 16790 16800 |
| SARS-CoV-2 Reference Genome NC_045512.2              | (16361) | TCTTGCTGTGTTAATCCGTATGTTTGCAATGCTCCAGGTTGTGATGTCACAGATGTGACTCAACTTTACTTAGGAGGTATG |       |       |       |       |       |       |             |
| Alternaria brassicicola endornavirus isolate 1 NC... | (10291) | -----                                                                             |       |       |       |       |       |       |             |

## SARS-CoV-2 &amp; Alternaria brassicicola endornavirus.apr

|                                                              |                                                                                   |       |       |       |       |       |       |       |       |
|--------------------------------------------------------------|-----------------------------------------------------------------------------------|-------|-------|-------|-------|-------|-------|-------|-------|
| Section 211                                                  |                                                                                   |       |       |       |       |       |       |       |       |
| (16801)                                                      | 16801                                                                             | 16810 | 16820 | 16830 | 16840 | 16850 | 16860 | 16870 | 16880 |
| SARS-CoV-2 Reference Genome NC_045512.2 (16441)              | AGCTATTATTGTAAATCACATAAACCCACCCATTAGTTTTCCATTGTGTGCTAATGGACAAGTTTTTGGTTTATATAAAAA |       |       |       |       |       |       |       |       |
| Alternaria brassicicola endornavirus isolate 1 NC... (10291) | -----                                                                             |       |       |       |       |       |       |       |       |
| Section 212                                                  |                                                                                   |       |       |       |       |       |       |       |       |
| (16881)                                                      | 16881                                                                             | 16890 | 16900 | 16910 | 16920 | 16930 | 16940 | 16950 | 16960 |
| SARS-CoV-2 Reference Genome NC_045512.2 (16521)              | TACATGTGTTGGTAGCGATAATGTTACTGACTTTAATGCAATTGCAACATGTGACTGGACAAATGCTGGTGATTACATTT  |       |       |       |       |       |       |       |       |
| Alternaria brassicicola endornavirus isolate 1 NC... (10291) | -----                                                                             |       |       |       |       |       |       |       |       |
| Section 213                                                  |                                                                                   |       |       |       |       |       |       |       |       |
| (16961)                                                      | 16961                                                                             | 16970 | 16980 | 16990 | 17000 | 17010 | 17020 | 17030 | 17040 |
| SARS-CoV-2 Reference Genome NC_045512.2 (16601)              | TAGCTAACACCTGTACTGAAAGACTCAAGCTTTTTGCAGCAGAAACGCTCAAAGCTACTGAGGAGACATTTAAACTGTCT  |       |       |       |       |       |       |       |       |
| Alternaria brassicicola endornavirus isolate 1 NC... (10291) | -----                                                                             |       |       |       |       |       |       |       |       |
| Section 214                                                  |                                                                                   |       |       |       |       |       |       |       |       |
| (17041)                                                      | 17041                                                                             | 17050 | 17060 | 17070 | 17080 | 17090 | 17100 | 17110 | 17120 |
| SARS-CoV-2 Reference Genome NC_045512.2 (16681)              | TATGGTATTGCTACTGTACGTGAAGTGCTGTCTGACAGAGAATTACATCTTTCATGGGAAGTTGGTAAACCTAGACCACC  |       |       |       |       |       |       |       |       |
| Alternaria brassicicola endornavirus isolate 1 NC... (10291) | -----                                                                             |       |       |       |       |       |       |       |       |
| Section 215                                                  |                                                                                   |       |       |       |       |       |       |       |       |
| (17121)                                                      | 17121                                                                             | 17130 | 17140 | 17150 | 17160 | 17170 | 17180 | 17190 | 17200 |
| SARS-CoV-2 Reference Genome NC_045512.2 (16761)              | ACTTAACCGAAATTATGTCTTTACTGGTTATCGTGTAACATAAACAGTAAAGTACAAATAGGAGAGTACACCTTTGAAA   |       |       |       |       |       |       |       |       |
| Alternaria brassicicola endornavirus isolate 1 NC... (10291) | -----                                                                             |       |       |       |       |       |       |       |       |
| Section 216                                                  |                                                                                   |       |       |       |       |       |       |       |       |
| (17201)                                                      | 17201                                                                             | 17210 | 17220 | 17230 | 17240 | 17250 | 17260 | 17270 | 17280 |
| SARS-CoV-2 Reference Genome NC_045512.2 (16841)              | AAGGTGACTATGGTGATGCTGTTGTTTACCGAGGTACAACAACCTACAAATTAAATGTTGGTGATTATTTTGTGCTGACA  |       |       |       |       |       |       |       |       |
| Alternaria brassicicola endornavirus isolate 1 NC... (10291) | -----                                                                             |       |       |       |       |       |       |       |       |
| Section 217                                                  |                                                                                   |       |       |       |       |       |       |       |       |
| (17281)                                                      | 17281                                                                             | 17290 | 17300 | 17310 | 17320 | 17330 | 17340 | 17350 | 17360 |
| SARS-CoV-2 Reference Genome NC_045512.2 (16921)              | TCACATACAGTAATGCCATTAAAGTGCACCTACACTAGTGCCACAAGAGCACTATGTTAGAATTACTGGCTTATACCCAAC |       |       |       |       |       |       |       |       |
| Alternaria brassicicola endornavirus isolate 1 NC... (10291) | -----                                                                             |       |       |       |       |       |       |       |       |

## SARS-CoV-2 &amp; Alternaria brassicicola endornavirus.apr

|                                                      |         |                                                                                  |       |       |       |       |       |       |             |
|------------------------------------------------------|---------|----------------------------------------------------------------------------------|-------|-------|-------|-------|-------|-------|-------------|
| Section 218                                          |         |                                                                                  |       |       |       |       |       |       |             |
|                                                      | (17361) | 17361                                                                            | 17370 | 17380 | 17390 | 17400 | 17410 | 17420 | 17430 17440 |
| SARS-CoV-2 Reference Genome NC_045512.2              | (17001) | ACTCAATATCTCAGATGAGTTTTCTAGCAATGTTGCAAATTATCAAAAGGTTGGTATGCAAAAGTATTCTACACTCCAGG |       |       |       |       |       |       |             |
| Alternaria brassicicola endornavirus isolate 1 NC... | (10291) | -----                                                                            |       |       |       |       |       |       |             |
| Section 219                                          |         |                                                                                  |       |       |       |       |       |       |             |
|                                                      | (17441) | 17441                                                                            | 17450 | 17460 | 17470 | 17480 | 17490 | 17500 | 17510 17520 |
| SARS-CoV-2 Reference Genome NC_045512.2              | (17081) | GACCACCTGGTACTGGTAAGAGTCATTTTGCTATTGGCCTAGCTCTCTACTACCCTTCTGCTCGCATAGTGTATACAGCT |       |       |       |       |       |       |             |
| Alternaria brassicicola endornavirus isolate 1 NC... | (10291) | -----                                                                            |       |       |       |       |       |       |             |
| Section 220                                          |         |                                                                                  |       |       |       |       |       |       |             |
|                                                      | (17521) | 17521                                                                            | 17530 | 17540 | 17550 | 17560 | 17570 | 17580 | 17590 17600 |
| SARS-CoV-2 Reference Genome NC_045512.2              | (17161) | TGCTCTCATGCCGCTGTTGATGCACTATGTGAGAAGGCATTAAATATTTGCCTATAGATAAATGTAGTAGAATTATACC  |       |       |       |       |       |       |             |
| Alternaria brassicicola endornavirus isolate 1 NC... | (10291) | -----                                                                            |       |       |       |       |       |       |             |
| Section 221                                          |         |                                                                                  |       |       |       |       |       |       |             |
|                                                      | (17601) | 17601                                                                            | 17610 | 17620 | 17630 | 17640 | 17650 | 17660 | 17670 17680 |
| SARS-CoV-2 Reference Genome NC_045512.2              | (17241) | TGCACGTGCTCGTGTAGAGTGTTTTGATAAATTCAAAGTGAATTCAACATTAGAACAGTATGTCTTTTGTACTGTAAATG |       |       |       |       |       |       |             |
| Alternaria brassicicola endornavirus isolate 1 NC... | (10291) | -----                                                                            |       |       |       |       |       |       |             |
| Section 222                                          |         |                                                                                  |       |       |       |       |       |       |             |
|                                                      | (17681) | 17681                                                                            | 17690 | 17700 | 17710 | 17720 | 17730 | 17740 | 17750 17760 |
| SARS-CoV-2 Reference Genome NC_045512.2              | (17321) | CATTGCCTGAGACGACAGCAGATATAGTTGTCTTTGATGAAATTTCAATGGCCACAAATTATGATTTGAGTGTTGTCAAT |       |       |       |       |       |       |             |
| Alternaria brassicicola endornavirus isolate 1 NC... | (10291) | -----                                                                            |       |       |       |       |       |       |             |
| Section 223                                          |         |                                                                                  |       |       |       |       |       |       |             |
|                                                      | (17761) | 17761                                                                            | 17770 | 17780 | 17790 | 17800 | 17810 | 17820 | 17830 17840 |
| SARS-CoV-2 Reference Genome NC_045512.2              | (17401) | GCCAGATTACGTGCTAAGCACTATGTGTACATTGGCGACCCTGCTCAATTACCTGCACCACGCACATTGCTAACTAAGGG |       |       |       |       |       |       |             |
| Alternaria brassicicola endornavirus isolate 1 NC... | (10291) | -----                                                                            |       |       |       |       |       |       |             |
| Section 224                                          |         |                                                                                  |       |       |       |       |       |       |             |
|                                                      | (17841) | 17841                                                                            | 17850 | 17860 | 17870 | 17880 | 17890 | 17900 | 17910 17920 |
| SARS-CoV-2 Reference Genome NC_045512.2              | (17481) | CACACTAGAACCAGAATATTTCAATTCAGTGTGTAGACTTATGAAAATATAGGTCCAGACATGTTCTCGGAACTTGTC   |       |       |       |       |       |       |             |
| Alternaria brassicicola endornavirus isolate 1 NC... | (10291) | -----                                                                            |       |       |       |       |       |       |             |



## SARS-CoV-2 &amp; Alternaria brassicicola endornavirus.apr

|                                                      |         |                                                                                  |       |       |       |       |       |       |             |
|------------------------------------------------------|---------|----------------------------------------------------------------------------------|-------|-------|-------|-------|-------|-------|-------------|
|                                                      |         | Section 225                                                                      |       |       |       |       |       |       |             |
|                                                      | (17921) | 17921                                                                            | 17930 | 17940 | 17950 | 17960 | 17970 | 17980 | 17990 18000 |
| SARS-CoV-2 Reference Genome NC_045512.2              | (17561) | GGCGTTGTCCTGCTGAAATTGTTGACACTGTGAGTGCTTTGGTTTATGATAATAAGCTTAAAGCACATAAAGACAAATCA |       |       |       |       |       |       |             |
| Alternaria brassicicola endornavirus isolate 1 NC... | (10291) | -----                                                                            |       |       |       |       |       |       |             |
|                                                      |         | Section 226                                                                      |       |       |       |       |       |       |             |
|                                                      | (18001) | 18001                                                                            | 18010 | 18020 | 18030 | 18040 | 18050 | 18060 | 18070 18080 |
| SARS-CoV-2 Reference Genome NC_045512.2              | (17641) | GCTCAATGCTTTAAATGTTTTATAAGGGTGTTCACGCATGATGTTTCATCTGCAATTAACAGGCCACAAATAGGCGT    |       |       |       |       |       |       |             |
| Alternaria brassicicola endornavirus isolate 1 NC... | (10291) | -----                                                                            |       |       |       |       |       |       |             |
|                                                      |         | Section 227                                                                      |       |       |       |       |       |       |             |
|                                                      | (18081) | 18081                                                                            | 18090 | 18100 | 18110 | 18120 | 18130 | 18140 | 18150 18160 |
| SARS-CoV-2 Reference Genome NC_045512.2              | (17721) | GGTAAGAGAATTCCTTACACGTAACCCTGCTTGGAGAAAAGCTGTCTTTATTTACCTTATAATTCACAGAATGCTGTAG  |       |       |       |       |       |       |             |
| Alternaria brassicicola endornavirus isolate 1 NC... | (10291) | -----                                                                            |       |       |       |       |       |       |             |
|                                                      |         | Section 228                                                                      |       |       |       |       |       |       |             |
|                                                      | (18161) | 18161                                                                            | 18170 | 18180 | 18190 | 18200 | 18210 | 18220 | 18230 18240 |
| SARS-CoV-2 Reference Genome NC_045512.2              | (17801) | CCTCAAAGATTTTGGGACTACCAACTCAAACGTGATTTCATCACAGGGCTCAGAATATGACTATGTCATATTCACCTCAA |       |       |       |       |       |       |             |
| Alternaria brassicicola endornavirus isolate 1 NC... | (10291) | -----                                                                            |       |       |       |       |       |       |             |
|                                                      |         | Section 229                                                                      |       |       |       |       |       |       |             |
|                                                      | (18241) | 18241                                                                            | 18250 | 18260 | 18270 | 18280 | 18290 | 18300 | 18310 18320 |
| SARS-CoV-2 Reference Genome NC_045512.2              | (17881) | ACCACTGAAACAGCTCACTCTTGTAATGTAAACAGATTTAATGTTGCTATTACCAGAGCAAAAGTAGGCATACTTTGCAT |       |       |       |       |       |       |             |
| Alternaria brassicicola endornavirus isolate 1 NC... | (10291) | -----                                                                            |       |       |       |       |       |       |             |
|                                                      |         | Section 230                                                                      |       |       |       |       |       |       |             |
|                                                      | (18321) | 18321                                                                            | 18330 | 18340 | 18350 | 18360 | 18370 | 18380 | 18390 18400 |
| SARS-CoV-2 Reference Genome NC_045512.2              | (17961) | AATGTCTGATAGAGACCTTTATGACAAGTTGCAATTTACAAGTCTTGAAATTCCACGTAGGAATGTGGCACTTTACAAG  |       |       |       |       |       |       |             |
| Alternaria brassicicola endornavirus isolate 1 NC... | (10291) | -----                                                                            |       |       |       |       |       |       |             |
|                                                      |         | Section 231                                                                      |       |       |       |       |       |       |             |
|                                                      | (18401) | 18401                                                                            | 18410 | 18420 | 18430 | 18440 | 18450 | 18460 | 18470 18480 |
| SARS-CoV-2 Reference Genome NC_045512.2              | (18041) | CTGAAAATGTAACAGGACTCTTTAAAGATTGTAGTAAGGTAATCACTGGGTACATCCTACACAGGCACCTACACACCTC  |       |       |       |       |       |       |             |
| Alternaria brassicicola endornavirus isolate 1 NC... | (10291) | -----                                                                            |       |       |       |       |       |       |             |

## SARS-CoV-2 &amp; Alternaria brassicicola endornavirus.apr

|                                                              |                                                                                   |       |       |       |       |       |       |       |       |
|--------------------------------------------------------------|-----------------------------------------------------------------------------------|-------|-------|-------|-------|-------|-------|-------|-------|
| Section 232                                                  |                                                                                   |       |       |       |       |       |       |       |       |
| (18481)                                                      | 18481                                                                             | 18490 | 18500 | 18510 | 18520 | 18530 | 18540 | 18550 | 18560 |
| SARS-CoV-2 Reference Genome NC_045512.2 (18121)              | AGTGTGACACTAAATTCAAACCTGAAGGTTTATGTGTTGACATACCTGGCATAACCTAAGGACATGACCTATAGAAGACT  |       |       |       |       |       |       |       |       |
| Alternaria brassicicola endornavirus isolate 1 NC... (10291) | -----                                                                             |       |       |       |       |       |       |       |       |
| Section 233                                                  |                                                                                   |       |       |       |       |       |       |       |       |
| (18561)                                                      | 18561                                                                             | 18570 | 18580 | 18590 | 18600 | 18610 | 18620 | 18630 | 18640 |
| SARS-CoV-2 Reference Genome NC_045512.2 (18201)              | CATCTCTATGATGGGTTTTAAAATGAATTATCAAGTTAATGGTTACCCTAACATGTTTATCACCCGCGAAGAAGCTATAA  |       |       |       |       |       |       |       |       |
| Alternaria brassicicola endornavirus isolate 1 NC... (10291) | -----                                                                             |       |       |       |       |       |       |       |       |
| Section 234                                                  |                                                                                   |       |       |       |       |       |       |       |       |
| (18641)                                                      | 18641                                                                             | 18650 | 18660 | 18670 | 18680 | 18690 | 18700 | 18710 | 18720 |
| SARS-CoV-2 Reference Genome NC_045512.2 (18281)              | GACATGTACGTGCATGGATTGGCTTCGATGTCGAGGGGTGTCATGCTACTAGAGAAGCTGTTGGTACCAATTTACCTTTA  |       |       |       |       |       |       |       |       |
| Alternaria brassicicola endornavirus isolate 1 NC... (10291) | -----                                                                             |       |       |       |       |       |       |       |       |
| Section 235                                                  |                                                                                   |       |       |       |       |       |       |       |       |
| (18721)                                                      | 18721                                                                             | 18730 | 18740 | 18750 | 18760 | 18770 | 18780 | 18790 | 18800 |
| SARS-CoV-2 Reference Genome NC_045512.2 (18361)              | CAGCTAGGTTTTTCTACAGGTGTTAACCTAGTTGCTGTACCTACAGGTTATGTTGATACACCTAATAATACAGATTTTTTC |       |       |       |       |       |       |       |       |
| Alternaria brassicicola endornavirus isolate 1 NC... (10291) | -----                                                                             |       |       |       |       |       |       |       |       |
| Section 236                                                  |                                                                                   |       |       |       |       |       |       |       |       |
| (18801)                                                      | 18801                                                                             | 18810 | 18820 | 18830 | 18840 | 18850 | 18860 | 18870 | 18880 |
| SARS-CoV-2 Reference Genome NC_045512.2 (18441)              | CAGAGTTAGTGCTAAACCACCGCCTGGAGATCAATTTAAACACCTCATACCACTTATGTACAAAGGACTTCCTTGGAATG  |       |       |       |       |       |       |       |       |
| Alternaria brassicicola endornavirus isolate 1 NC... (10291) | -----                                                                             |       |       |       |       |       |       |       |       |
| Section 237                                                  |                                                                                   |       |       |       |       |       |       |       |       |
| (18881)                                                      | 18881                                                                             | 18890 | 18900 | 18910 | 18920 | 18930 | 18940 | 18950 | 18960 |
| SARS-CoV-2 Reference Genome NC_045512.2 (18521)              | TAGTGCGTATAAAGATTGTACAAATGTTAAGTGACACACTTAAAAATCTCTCTGACAGAGTCGTATTTGTCTTATGGGCA  |       |       |       |       |       |       |       |       |
| Alternaria brassicicola endornavirus isolate 1 NC... (10291) | -----                                                                             |       |       |       |       |       |       |       |       |
| Section 238                                                  |                                                                                   |       |       |       |       |       |       |       |       |
| (18961)                                                      | 18961                                                                             | 18970 | 18980 | 18990 | 19000 | 19010 | 19020 | 19030 | 19040 |
| SARS-CoV-2 Reference Genome NC_045512.2 (18601)              | CATGGCTTTGAGTTGACATCTATGAAGTATTTTGTGAAAATAGGACCTGAGCGCACCTGTTGTCTATGTGATAGACGTGC  |       |       |       |       |       |       |       |       |
| Alternaria brassicicola endornavirus isolate 1 NC... (10291) | -----                                                                             |       |       |       |       |       |       |       |       |

SARS-CoV-2 & Alternaria brassicicola endornavirus.apr

|                                                      |         |                                                                                   |       |       |       |       |       |       |             |
|------------------------------------------------------|---------|-----------------------------------------------------------------------------------|-------|-------|-------|-------|-------|-------|-------------|
|                                                      |         | Section 239                                                                       |       |       |       |       |       |       |             |
|                                                      | (19041) | 19041                                                                             | 19050 | 19060 | 19070 | 19080 | 19090 | 19100 | 19110 19120 |
| SARS-CoV-2 Reference Genome NC_045512.2              | (18681) | CACATGCTTTTCCACTGCTTCAGACACTTATGCCTGTTGGCATCATTCTATTGGATTGATTACGTCTATAATCCGTTTA   |       |       |       |       |       |       |             |
| Alternaria brassicicola endornavirus isolate 1 NC... | (10291) | -----                                                                             |       |       |       |       |       |       |             |
|                                                      |         | Section 240                                                                       |       |       |       |       |       |       |             |
|                                                      | (19121) | 19121                                                                             | 19130 | 19140 | 19150 | 19160 | 19170 | 19180 | 19190 19200 |
| SARS-CoV-2 Reference Genome NC_045512.2              | (18761) | TGATTGATGTTCAACAATGGGGTTTTACAGGTAACCTACAAAGCAACCATGATCTGTATTGTCAAGTCCATGGTAATGCA  |       |       |       |       |       |       |             |
| Alternaria brassicicola endornavirus isolate 1 NC... | (10291) | -----                                                                             |       |       |       |       |       |       |             |
|                                                      |         | Section 241                                                                       |       |       |       |       |       |       |             |
|                                                      | (19201) | 19201                                                                             | 19210 | 19220 | 19230 | 19240 | 19250 | 19260 | 19270 19280 |
| SARS-CoV-2 Reference Genome NC_045512.2              | (18841) | CATGTAGCTAGTTGTGATGCAATCATGACTAGGTGTCTAGCTGTCCACGAGTGCTTTGTTAAGCGTGTGACTGGACTAT   |       |       |       |       |       |       |             |
| Alternaria brassicicola endornavirus isolate 1 NC... | (10291) | -----                                                                             |       |       |       |       |       |       |             |
|                                                      |         | Section 242                                                                       |       |       |       |       |       |       |             |
|                                                      | (19281) | 19281                                                                             | 19290 | 19300 | 19310 | 19320 | 19330 | 19340 | 19350 19360 |
| SARS-CoV-2 Reference Genome NC_045512.2              | (18921) | TGAATATCCTATAATTGGTGATGAAGATTAATGCGGCTTGTAGAAAGGTTCAACACATGGTTGTTAAAGCTGCAT       |       |       |       |       |       |       |             |
| Alternaria brassicicola endornavirus isolate 1 NC... | (10291) | -----                                                                             |       |       |       |       |       |       |             |
|                                                      |         | Section 243                                                                       |       |       |       |       |       |       |             |
|                                                      | (19361) | 19361                                                                             | 19370 | 19380 | 19390 | 19400 | 19410 | 19420 | 19430 19440 |
| SARS-CoV-2 Reference Genome NC_045512.2              | (19001) | TATTAGCAGACAAATTCCTCAGTTCTTCACGACATTGGTAACCTAAAGCTATTAAGTGTGTACCTCAAGCTGATGTAGAA  |       |       |       |       |       |       |             |
| Alternaria brassicicola endornavirus isolate 1 NC... | (10291) | -----                                                                             |       |       |       |       |       |       |             |
|                                                      |         | Section 244                                                                       |       |       |       |       |       |       |             |
|                                                      | (19441) | 19441                                                                             | 19450 | 19460 | 19470 | 19480 | 19490 | 19500 | 19510 19520 |
| SARS-CoV-2 Reference Genome NC_045512.2              | (19081) | TGGAAGTTCTATGATGCACAGCCTTGTAGTGACAAAGCTTATAAAATAGAAGAATTATTCTATTCTTATGCCACACATTC  |       |       |       |       |       |       |             |
| Alternaria brassicicola endornavirus isolate 1 NC... | (10291) | -----                                                                             |       |       |       |       |       |       |             |
|                                                      |         | Section 245                                                                       |       |       |       |       |       |       |             |
|                                                      | (19521) | 19521                                                                             | 19530 | 19540 | 19550 | 19560 | 19570 | 19580 | 19590 19600 |
| SARS-CoV-2 Reference Genome NC_045512.2              | (19161) | TGACAAATTCACAGATGGTGTATGCCTATTTTGGGAATTGCAATGTCGATAGATATCCTGCTAATTCCATTGTTTGTAGAT |       |       |       |       |       |       |             |
| Alternaria brassicicola endornavirus isolate 1 NC... | (10291) | -----                                                                             |       |       |       |       |       |       |             |

## SARS-CoV-2 &amp; Alternaria brassicicola endornavirus.apr

|                                                              |                                                                                    |       |       |       |       |       |       |       |       |
|--------------------------------------------------------------|------------------------------------------------------------------------------------|-------|-------|-------|-------|-------|-------|-------|-------|
| Section 246                                                  |                                                                                    |       |       |       |       |       |       |       |       |
| (19601)                                                      | 19601                                                                              | 19610 | 19620 | 19630 | 19640 | 19650 | 19660 | 19670 | 19680 |
| SARS-CoV-2 Reference Genome NC_045512.2 (19241)              | TTGACACTAGAGTGCTATCTAACCTTAACTTGCCTGGTTGTGATGGTGGCAGTTTGTATGTAAATAAACATGCATTCCAC   |       |       |       |       |       |       |       |       |
| Alternaria brassicicola endornavirus isolate 1 NC... (10291) | -----                                                                              |       |       |       |       |       |       |       |       |
| Section 247                                                  |                                                                                    |       |       |       |       |       |       |       |       |
| (19681)                                                      | 19681                                                                              | 19690 | 19700 | 19710 | 19720 | 19730 | 19740 | 19750 | 19760 |
| SARS-CoV-2 Reference Genome NC_045512.2 (19321)              | ACACCAGCTTTTGATAAAAGTGCTTTTGTTAATTTAAACAATTACCATTTTCTATTACTCTGACAGTCCATGTGAGTC     |       |       |       |       |       |       |       |       |
| Alternaria brassicicola endornavirus isolate 1 NC... (10291) | -----                                                                              |       |       |       |       |       |       |       |       |
| Section 248                                                  |                                                                                    |       |       |       |       |       |       |       |       |
| (19761)                                                      | 19761                                                                              | 19770 | 19780 | 19790 | 19800 | 19810 | 19820 | 19830 | 19840 |
| SARS-CoV-2 Reference Genome NC_045512.2 (19401)              | TCATGGAAAACAAGTAGTGTCTCAGATATAGATTATGTACCACTAAAGTCTGCTACGTGTATAACACGTTGCAATTTAGGTG |       |       |       |       |       |       |       |       |
| Alternaria brassicicola endornavirus isolate 1 NC... (10291) | -----                                                                              |       |       |       |       |       |       |       |       |
| Section 249                                                  |                                                                                    |       |       |       |       |       |       |       |       |
| (19841)                                                      | 19841                                                                              | 19850 | 19860 | 19870 | 19880 | 19890 | 19900 | 19910 | 19920 |
| SARS-CoV-2 Reference Genome NC_045512.2 (19481)              | GTGCTGTCTGTAGACATCATGCTAATGAGTACAGATTGTATCTCGATGCTTATAACATGATGATCTCAGCTGGCTTTAGC   |       |       |       |       |       |       |       |       |
| Alternaria brassicicola endornavirus isolate 1 NC... (10291) | -----                                                                              |       |       |       |       |       |       |       |       |
| Section 250                                                  |                                                                                    |       |       |       |       |       |       |       |       |
| (19921)                                                      | 19921                                                                              | 19930 | 19940 | 19950 | 19960 | 19970 | 19980 | 19990 | 20000 |
| SARS-CoV-2 Reference Genome NC_045512.2 (19561)              | TTGTGGGTTTACAAACAATTTGATACTTATAACCTCTGGAACACTTTTACAAGACTTCAGAGTTTAGAAAATGTGGCTTT   |       |       |       |       |       |       |       |       |
| Alternaria brassicicola endornavirus isolate 1 NC... (10291) | -----                                                                              |       |       |       |       |       |       |       |       |
| Section 251                                                  |                                                                                    |       |       |       |       |       |       |       |       |
| (20001)                                                      | 20001                                                                              | 20010 | 20020 | 20030 | 20040 | 20050 | 20060 | 20070 | 20080 |
| SARS-CoV-2 Reference Genome NC_045512.2 (19641)              | TAATGTTGTAAATAAGGGACACTTTGATGGACAACAGGGTGAAGTACCAGTTTCTATCATTAAATAACACTGTTTACACAA  |       |       |       |       |       |       |       |       |
| Alternaria brassicicola endornavirus isolate 1 NC... (10291) | -----                                                                              |       |       |       |       |       |       |       |       |
| Section 252                                                  |                                                                                    |       |       |       |       |       |       |       |       |
| (20081)                                                      | 20081                                                                              | 20090 | 20100 | 20110 | 20120 | 20130 | 20140 | 20150 | 20160 |
| SARS-CoV-2 Reference Genome NC_045512.2 (19721)              | AAGTTGATGGTGTGATGTAGAATTGTTTGAAAATAAAACAACATTACCTGTTAATGTAGCATTTGAGCTTTGGGCTAAG    |       |       |       |       |       |       |       |       |
| Alternaria brassicicola endornavirus isolate 1 NC... (10291) | -----                                                                              |       |       |       |       |       |       |       |       |

## SARS-CoV-2 &amp; Alternaria brassicicola endornavirus.apr

|                                                              |                                                                                  |                       |                       |                       |                       |                       |                       |                       |                       |
|--------------------------------------------------------------|----------------------------------------------------------------------------------|-----------------------|-----------------------|-----------------------|-----------------------|-----------------------|-----------------------|-----------------------|-----------------------|
| Section 253                                                  |                                                                                  |                       |                       |                       |                       |                       |                       |                       |                       |
| (20161)                                                      | <a href="#">20161</a>                                                            | <a href="#">20170</a> | <a href="#">20180</a> | <a href="#">20190</a> | <a href="#">20200</a> | <a href="#">20210</a> | <a href="#">20220</a> | <a href="#">20230</a> | <a href="#">20240</a> |
| SARS-CoV-2 Reference Genome NC_045512.2 (19801)              | CGCAACATTAAACCAGTACCAGAGGTGAAAATACTCAATAATTTGGGTGTGGACATTGCTGCTAATACTGTGATCTGGGA |                       |                       |                       |                       |                       |                       |                       |                       |
| Alternaria brassicicola endornavirus isolate 1 NC... (10291) | -----                                                                            |                       |                       |                       |                       |                       |                       |                       |                       |
| Section 254                                                  |                                                                                  |                       |                       |                       |                       |                       |                       |                       |                       |
| (20241)                                                      | <a href="#">20241</a>                                                            | <a href="#">20250</a> | <a href="#">20260</a> | <a href="#">20270</a> | <a href="#">20280</a> | <a href="#">20290</a> | <a href="#">20300</a> | <a href="#">20310</a> | <a href="#">20320</a> |
| SARS-CoV-2 Reference Genome NC_045512.2 (19881)              | CTACAAAAGAGATGCTCCAGCACATATATCTACTATTGGTGTTTGTCTATGACTGACATAGCCAAGAAACCAACTGAAA  |                       |                       |                       |                       |                       |                       |                       |                       |
| Alternaria brassicicola endornavirus isolate 1 NC... (10291) | -----                                                                            |                       |                       |                       |                       |                       |                       |                       |                       |
| Section 255                                                  |                                                                                  |                       |                       |                       |                       |                       |                       |                       |                       |
| (20321)                                                      | <a href="#">20321</a>                                                            | <a href="#">20330</a> | <a href="#">20340</a> | <a href="#">20350</a> | <a href="#">20360</a> | <a href="#">20370</a> | <a href="#">20380</a> | <a href="#">20390</a> | <a href="#">20400</a> |
| SARS-CoV-2 Reference Genome NC_045512.2 (19961)              | CGATTTGTGCACCACTCACTGTCTTTTTTGATGGTAGAGTTGATGGTCAAGTAGACTTATTTAGAAATGCCCGTAATGGT |                       |                       |                       |                       |                       |                       |                       |                       |
| Alternaria brassicicola endornavirus isolate 1 NC... (10291) | -----                                                                            |                       |                       |                       |                       |                       |                       |                       |                       |
| Section 256                                                  |                                                                                  |                       |                       |                       |                       |                       |                       |                       |                       |
| (20401)                                                      | <a href="#">20401</a>                                                            | <a href="#">20410</a> | <a href="#">20420</a> | <a href="#">20430</a> | <a href="#">20440</a> | <a href="#">20450</a> | <a href="#">20460</a> | <a href="#">20470</a> | <a href="#">20480</a> |
| SARS-CoV-2 Reference Genome NC_045512.2 (20041)              | GTTCTTATTACAGAAGGTAGTGTTAAAGGTTTACAACCATCTGTAGGTCCCAAACAAGCTAGTCTTAATGGAGTCACATT |                       |                       |                       |                       |                       |                       |                       |                       |
| Alternaria brassicicola endornavirus isolate 1 NC... (10291) | -----                                                                            |                       |                       |                       |                       |                       |                       |                       |                       |
| Section 257                                                  |                                                                                  |                       |                       |                       |                       |                       |                       |                       |                       |
| (20481)                                                      | <a href="#">20481</a>                                                            | <a href="#">20490</a> | <a href="#">20500</a> | <a href="#">20510</a> | <a href="#">20520</a> | <a href="#">20530</a> | <a href="#">20540</a> | <a href="#">20550</a> | <a href="#">20560</a> |
| SARS-CoV-2 Reference Genome NC_045512.2 (20121)              | AATTGGAGAAGCCGTAAAAACACAGTTCAATTATTATAAGAAAGTTGATGGTGTTGTCCAACAATTACCTGAAACTTACT |                       |                       |                       |                       |                       |                       |                       |                       |
| Alternaria brassicicola endornavirus isolate 1 NC... (10291) | -----                                                                            |                       |                       |                       |                       |                       |                       |                       |                       |
| Section 258                                                  |                                                                                  |                       |                       |                       |                       |                       |                       |                       |                       |
| (20561)                                                      | <a href="#">20561</a>                                                            | <a href="#">20570</a> | <a href="#">20580</a> | <a href="#">20590</a> | <a href="#">20600</a> | <a href="#">20610</a> | <a href="#">20620</a> | <a href="#">20630</a> | <a href="#">20640</a> |
| SARS-CoV-2 Reference Genome NC_045512.2 (20201)              | TTACTCAGAGTAGAAATTTACAAGAATTTAAACCCAGGAGTCAAATGGAAATTGATTTCTTAGAATTAGCTATGGATGAA |                       |                       |                       |                       |                       |                       |                       |                       |
| Alternaria brassicicola endornavirus isolate 1 NC... (10291) | -----                                                                            |                       |                       |                       |                       |                       |                       |                       |                       |
| Section 259                                                  |                                                                                  |                       |                       |                       |                       |                       |                       |                       |                       |
| (20641)                                                      | <a href="#">20641</a>                                                            | <a href="#">20650</a> | <a href="#">20660</a> | <a href="#">20670</a> | <a href="#">20680</a> | <a href="#">20690</a> | <a href="#">20700</a> | <a href="#">20710</a> | <a href="#">20720</a> |
| SARS-CoV-2 Reference Genome NC_045512.2 (20281)              | TTCATTGAACGGTATAAATTAGAAGGCTATGCCTTCGAACATATCGTTTATGGAGATTTTAGTCATAGTCAGTTAGGTGG |                       |                       |                       |                       |                       |                       |                       |                       |
| Alternaria brassicicola endornavirus isolate 1 NC... (10291) | -----                                                                            |                       |                       |                       |                       |                       |                       |                       |                       |

## SARS-CoV-2 &amp; Alternaria brassicicola endornavirus.apr

|                                                              |                                                                                   |                       |                       |                       |                       |                       |                       |                       |                       |
|--------------------------------------------------------------|-----------------------------------------------------------------------------------|-----------------------|-----------------------|-----------------------|-----------------------|-----------------------|-----------------------|-----------------------|-----------------------|
| Section 260                                                  |                                                                                   |                       |                       |                       |                       |                       |                       |                       |                       |
| (20721)                                                      | <a href="#">20721</a>                                                             | <a href="#">20730</a> | <a href="#">20740</a> | <a href="#">20750</a> | <a href="#">20760</a> | <a href="#">20770</a> | <a href="#">20780</a> | <a href="#">20790</a> | <a href="#">20800</a> |
| SARS-CoV-2 Reference Genome NC_045512.2 (20361)              | TTTACATCTACTGATTGGACTAGCTAAACGTTTTTAAGGAATCACCTTTTGAATTAGAAGATTTTATTCCTATGGACAGTA |                       |                       |                       |                       |                       |                       |                       |                       |
| Alternaria brassicicola endornavirus isolate 1 NC... (10291) | -----                                                                             |                       |                       |                       |                       |                       |                       |                       |                       |
| Section 261                                                  |                                                                                   |                       |                       |                       |                       |                       |                       |                       |                       |
| (20801)                                                      | <a href="#">20801</a>                                                             | <a href="#">20810</a> | <a href="#">20820</a> | <a href="#">20830</a> | <a href="#">20840</a> | <a href="#">20850</a> | <a href="#">20860</a> | <a href="#">20870</a> | <a href="#">20880</a> |
| SARS-CoV-2 Reference Genome NC_045512.2 (20441)              | CAGTTAAAACTATTTTCATAACAGATGCGCAAACAGGTTTCATCTAAGTGTGTGTGTTCTGTTATTGATTTATTACTTGAT |                       |                       |                       |                       |                       |                       |                       |                       |
| Alternaria brassicicola endornavirus isolate 1 NC... (10291) | -----                                                                             |                       |                       |                       |                       |                       |                       |                       |                       |
| Section 262                                                  |                                                                                   |                       |                       |                       |                       |                       |                       |                       |                       |
| (20881)                                                      | <a href="#">20881</a>                                                             | <a href="#">20890</a> | <a href="#">20900</a> | <a href="#">20910</a> | <a href="#">20920</a> | <a href="#">20930</a> | <a href="#">20940</a> | <a href="#">20950</a> | <a href="#">20960</a> |
| SARS-CoV-2 Reference Genome NC_045512.2 (20521)              | GATTTTGTGAAATAATAAAATCCCAAGATTTATCTGTAGTTTCTAAGGTTGTCAAAGTGACTATTGACTATACAGAAAT   |                       |                       |                       |                       |                       |                       |                       |                       |
| Alternaria brassicicola endornavirus isolate 1 NC... (10291) | -----                                                                             |                       |                       |                       |                       |                       |                       |                       |                       |
| Section 263                                                  |                                                                                   |                       |                       |                       |                       |                       |                       |                       |                       |
| (20961)                                                      | <a href="#">20961</a>                                                             | <a href="#">20970</a> | <a href="#">20980</a> | <a href="#">20990</a> | <a href="#">21000</a> | <a href="#">21010</a> | <a href="#">21020</a> | <a href="#">21030</a> | <a href="#">21040</a> |
| SARS-CoV-2 Reference Genome NC_045512.2 (20601)              | TTCATTTATGCTTTGGTGTAAGATGGCCATGTAGAAACATTTTACCCAAAATTACAATCTAGTCAAGCGTGGCAACCGG   |                       |                       |                       |                       |                       |                       |                       |                       |
| Alternaria brassicicola endornavirus isolate 1 NC... (10291) | -----                                                                             |                       |                       |                       |                       |                       |                       |                       |                       |
| Section 264                                                  |                                                                                   |                       |                       |                       |                       |                       |                       |                       |                       |
| (21041)                                                      | <a href="#">21041</a>                                                             | <a href="#">21050</a> | <a href="#">21060</a> | <a href="#">21070</a> | <a href="#">21080</a> | <a href="#">21090</a> | <a href="#">21100</a> | <a href="#">21110</a> | <a href="#">21120</a> |
| SARS-CoV-2 Reference Genome NC_045512.2 (20681)              | GTGTTGCTATGCCTAATCTTTACAAAATGCAAAGAATGCTATTAGAAAAGTGTGACCTTCAAATTTATGGTGATAGTGCA  |                       |                       |                       |                       |                       |                       |                       |                       |
| Alternaria brassicicola endornavirus isolate 1 NC... (10291) | -----                                                                             |                       |                       |                       |                       |                       |                       |                       |                       |
| Section 265                                                  |                                                                                   |                       |                       |                       |                       |                       |                       |                       |                       |
| (21121)                                                      | <a href="#">21121</a>                                                             | <a href="#">21130</a> | <a href="#">21140</a> | <a href="#">21150</a> | <a href="#">21160</a> | <a href="#">21170</a> | <a href="#">21180</a> | <a href="#">21190</a> | <a href="#">21200</a> |
| SARS-CoV-2 Reference Genome NC_045512.2 (20761)              | ACATTACCTAAAGGCATAATGATGAATGTCGCAAAATATACTCAACTGTGTCAATATTTAAACACATTAACATTAGCTGT  |                       |                       |                       |                       |                       |                       |                       |                       |
| Alternaria brassicicola endornavirus isolate 1 NC... (10291) | -----                                                                             |                       |                       |                       |                       |                       |                       |                       |                       |
| Section 266                                                  |                                                                                   |                       |                       |                       |                       |                       |                       |                       |                       |
| (21201)                                                      | <a href="#">21201</a>                                                             | <a href="#">21210</a> | <a href="#">21220</a> | <a href="#">21230</a> | <a href="#">21240</a> | <a href="#">21250</a> | <a href="#">21260</a> | <a href="#">21270</a> | <a href="#">21280</a> |
| SARS-CoV-2 Reference Genome NC_045512.2 (20841)              | ACCCTATAATATGAGAGTTATACATTTTGGTGCTGGTTCTGATAAAGGAGTTGCACCAGGTACAGCTGTTTTAAGACAGT  |                       |                       |                       |                       |                       |                       |                       |                       |
| Alternaria brassicicola endornavirus isolate 1 NC... (10291) | -----                                                                             |                       |                       |                       |                       |                       |                       |                       |                       |

## SARS-CoV-2 &amp; Alternaria brassicicola endornavirus.apr

|                                                              |                                                                                    |                       |                       |                       |                       |                       |                       |                       |                       |
|--------------------------------------------------------------|------------------------------------------------------------------------------------|-----------------------|-----------------------|-----------------------|-----------------------|-----------------------|-----------------------|-----------------------|-----------------------|
| Section 267                                                  |                                                                                    |                       |                       |                       |                       |                       |                       |                       |                       |
| (21281)                                                      | <a href="#">21281</a>                                                              | <a href="#">21290</a> | <a href="#">21300</a> | <a href="#">21310</a> | <a href="#">21320</a> | <a href="#">21330</a> | <a href="#">21340</a> | <a href="#">21350</a> | <a href="#">21360</a> |
| SARS-CoV-2 Reference Genome NC_045512.2 (20921)              | GGTTGCCTACGGGTACGCTGCTTGTGCGATTTCAGATCTTAATGACTTTGTCTCTGATGCAGATTCAACTTTGATTGGTGAT |                       |                       |                       |                       |                       |                       |                       |                       |
| Alternaria brassicicola endornavirus isolate 1 NC... (10291) | -----                                                                              |                       |                       |                       |                       |                       |                       |                       |                       |
| Section 268                                                  |                                                                                    |                       |                       |                       |                       |                       |                       |                       |                       |
| (21361)                                                      | <a href="#">21361</a>                                                              | <a href="#">21370</a> | <a href="#">21380</a> | <a href="#">21390</a> | <a href="#">21400</a> | <a href="#">21410</a> | <a href="#">21420</a> | <a href="#">21430</a> | <a href="#">21440</a> |
| SARS-CoV-2 Reference Genome NC_045512.2 (21001)              | TGTGCAACTGTACATACAGCTAATAAATGGGATCTCATTATTAGTGATATGTACGACCCTAAGACTAAAAATGTTACAAA   |                       |                       |                       |                       |                       |                       |                       |                       |
| Alternaria brassicicola endornavirus isolate 1 NC... (10291) | -----                                                                              |                       |                       |                       |                       |                       |                       |                       |                       |
| Section 269                                                  |                                                                                    |                       |                       |                       |                       |                       |                       |                       |                       |
| (21441)                                                      | <a href="#">21441</a>                                                              | <a href="#">21450</a> | <a href="#">21460</a> | <a href="#">21470</a> | <a href="#">21480</a> | <a href="#">21490</a> | <a href="#">21500</a> | <a href="#">21510</a> | <a href="#">21520</a> |
| SARS-CoV-2 Reference Genome NC_045512.2 (21081)              | AGAAAATGACTCTAAAGAGGGTTTTTTCACCTTACATTTGTGGGTTTATACAACAAAAGCTAGCTCTTGGAGGTTCCGTGG  |                       |                       |                       |                       |                       |                       |                       |                       |
| Alternaria brassicicola endornavirus isolate 1 NC... (10291) | -----                                                                              |                       |                       |                       |                       |                       |                       |                       |                       |
| Section 270                                                  |                                                                                    |                       |                       |                       |                       |                       |                       |                       |                       |
| (21521)                                                      | <a href="#">21521</a>                                                              | <a href="#">21530</a> | <a href="#">21540</a> | <a href="#">21550</a> | <a href="#">21560</a> | <a href="#">21570</a> | <a href="#">21580</a> | <a href="#">21590</a> | <a href="#">21600</a> |
| SARS-CoV-2 Reference Genome NC_045512.2 (21161)              | CTATAAAGATAACAGAACATTCTTGAATGCTGATCTTTATAAGCTCATGGGACACTTCGCATGGTGGACAGCCTTTGTT    |                       |                       |                       |                       |                       |                       |                       |                       |
| Alternaria brassicicola endornavirus isolate 1 NC... (10291) | -----                                                                              |                       |                       |                       |                       |                       |                       |                       |                       |
| Section 271                                                  |                                                                                    |                       |                       |                       |                       |                       |                       |                       |                       |
| (21601)                                                      | <a href="#">21601</a>                                                              | <a href="#">21610</a> | <a href="#">21620</a> | <a href="#">21630</a> | <a href="#">21640</a> | <a href="#">21650</a> | <a href="#">21660</a> | <a href="#">21670</a> | <a href="#">21680</a> |
| SARS-CoV-2 Reference Genome NC_045512.2 (21241)              | ACTAATGTGAATGCGTCATCATCTGAAGCATTTTTAATTGGATGTAATTATCTTGGCAAACCACGCGAACAAATAGATGG   |                       |                       |                       |                       |                       |                       |                       |                       |
| Alternaria brassicicola endornavirus isolate 1 NC... (10291) | -----                                                                              |                       |                       |                       |                       |                       |                       |                       |                       |
| Section 272                                                  |                                                                                    |                       |                       |                       |                       |                       |                       |                       |                       |
| (21681)                                                      | <a href="#">21681</a>                                                              | <a href="#">21690</a> | <a href="#">21700</a> | <a href="#">21710</a> | <a href="#">21720</a> | <a href="#">21730</a> | <a href="#">21740</a> | <a href="#">21750</a> | <a href="#">21760</a> |
| SARS-CoV-2 Reference Genome NC_045512.2 (21321)              | TTATGTCATGCATGCAAATTACATATTTTGGAGGAATACAAATCCAATTCAGTTGTCTTCTTATTCTTTATTTGACATGA   |                       |                       |                       |                       |                       |                       |                       |                       |
| Alternaria brassicicola endornavirus isolate 1 NC... (10291) | -----                                                                              |                       |                       |                       |                       |                       |                       |                       |                       |
| Section 273                                                  |                                                                                    |                       |                       |                       |                       |                       |                       |                       |                       |
| (21761)                                                      | <a href="#">21761</a>                                                              | <a href="#">21770</a> | <a href="#">21780</a> | <a href="#">21790</a> | <a href="#">21800</a> | <a href="#">21810</a> | <a href="#">21820</a> | <a href="#">21830</a> | <a href="#">21840</a> |
| SARS-CoV-2 Reference Genome NC_045512.2 (21401)              | GTAAATTTCCCTTAAATTAAGGGGTACTGCTGTTATGTCTTTAAAGAAGGTCAAATCAATGATATGATTTTATCTCTT     |                       |                       |                       |                       |                       |                       |                       |                       |
| Alternaria brassicicola endornavirus isolate 1 NC... (10291) | -----                                                                              |                       |                       |                       |                       |                       |                       |                       |                       |

## SARS-CoV-2 &amp; Alternaria brassicicola endornavirus.apr

|                                                              |                                                                                   |                       |                       |                       |                       |                       |                       |                       |                       |
|--------------------------------------------------------------|-----------------------------------------------------------------------------------|-----------------------|-----------------------|-----------------------|-----------------------|-----------------------|-----------------------|-----------------------|-----------------------|
| Section 274                                                  |                                                                                   |                       |                       |                       |                       |                       |                       |                       |                       |
| (21841)                                                      | <a href="#">21841</a>                                                             | <a href="#">21850</a> | <a href="#">21860</a> | <a href="#">21870</a> | <a href="#">21880</a> | <a href="#">21890</a> | <a href="#">21900</a> | <a href="#">21910</a> | <a href="#">21920</a> |
| SARS-CoV-2 Reference Genome NC_045512.2 (21481)              | CTTAGTAAAGGTAGACTTATAATTAGAGAAAACAACAGAGTTGTTATTTCTAGTGATGTTCTTGTTAACAACATAACGAA  |                       |                       |                       |                       |                       |                       |                       |                       |
| Alternaria brassicicola endornavirus isolate 1 NC... (10291) | -----                                                                             |                       |                       |                       |                       |                       |                       |                       |                       |
| Section 275                                                  |                                                                                   |                       |                       |                       |                       |                       |                       |                       |                       |
| (21921)                                                      | <a href="#">21921</a>                                                             | <a href="#">21930</a> | <a href="#">21940</a> | <a href="#">21950</a> | <a href="#">21960</a> | <a href="#">21970</a> | <a href="#">21980</a> | <a href="#">21990</a> | <a href="#">22000</a> |
| SARS-CoV-2 Reference Genome NC_045512.2 (21561)              | CAATGTTTGTCTTTCTGTTTATTGCCACTAGTCTCTAGTCAGTGTTAATCTTACAACCAGAACTCAATTACCCCT       |                       |                       |                       |                       |                       |                       |                       |                       |
| Alternaria brassicicola endornavirus isolate 1 NC... (10291) | -----                                                                             |                       |                       |                       |                       |                       |                       |                       |                       |
| Section 276                                                  |                                                                                   |                       |                       |                       |                       |                       |                       |                       |                       |
| (22001)                                                      | <a href="#">22001</a>                                                             | <a href="#">22010</a> | <a href="#">22020</a> | <a href="#">22030</a> | <a href="#">22040</a> | <a href="#">22050</a> | <a href="#">22060</a> | <a href="#">22070</a> | <a href="#">22080</a> |
| SARS-CoV-2 Reference Genome NC_045512.2 (21641)              | GCATACACTAATTCTTTACACAGTGGTGTATTACCCCTGACAAAGTTTTTCAGATCCTCAGTTTTACATTCAACTCAGGA  |                       |                       |                       |                       |                       |                       |                       |                       |
| Alternaria brassicicola endornavirus isolate 1 NC... (10291) | -----                                                                             |                       |                       |                       |                       |                       |                       |                       |                       |
| Section 277                                                  |                                                                                   |                       |                       |                       |                       |                       |                       |                       |                       |
| (22081)                                                      | <a href="#">22081</a>                                                             | <a href="#">22090</a> | <a href="#">22100</a> | <a href="#">22110</a> | <a href="#">22120</a> | <a href="#">22130</a> | <a href="#">22140</a> | <a href="#">22150</a> | <a href="#">22160</a> |
| SARS-CoV-2 Reference Genome NC_045512.2 (21721)              | CTTGTTCTTACCTTTCTTTTCCAATGTTACTTGGTTCATGCTATACATGTCTCTGGGACCAATGGTACTAAGAGGTTTG   |                       |                       |                       |                       |                       |                       |                       |                       |
| Alternaria brassicicola endornavirus isolate 1 NC... (10291) | -----                                                                             |                       |                       |                       |                       |                       |                       |                       |                       |
| Section 278                                                  |                                                                                   |                       |                       |                       |                       |                       |                       |                       |                       |
| (22161)                                                      | <a href="#">22161</a>                                                             | <a href="#">22170</a> | <a href="#">22180</a> | <a href="#">22190</a> | <a href="#">22200</a> | <a href="#">22210</a> | <a href="#">22220</a> | <a href="#">22230</a> | <a href="#">22240</a> |
| SARS-CoV-2 Reference Genome NC_045512.2 (21801)              | ATAACCCTGTCCTACCATTTAATGATGGTGTATTATTTGCTTCCACTGAGAAGTCTAACATAATAAGAGGCTGGATTTTT  |                       |                       |                       |                       |                       |                       |                       |                       |
| Alternaria brassicicola endornavirus isolate 1 NC... (10291) | -----                                                                             |                       |                       |                       |                       |                       |                       |                       |                       |
| Section 279                                                  |                                                                                   |                       |                       |                       |                       |                       |                       |                       |                       |
| (22241)                                                      | <a href="#">22241</a>                                                             | <a href="#">22250</a> | <a href="#">22260</a> | <a href="#">22270</a> | <a href="#">22280</a> | <a href="#">22290</a> | <a href="#">22300</a> | <a href="#">22310</a> | <a href="#">22320</a> |
| SARS-CoV-2 Reference Genome NC_045512.2 (21881)              | GGTACTACTTTAGATTTCGAAGACCCAGTCCCTACTTATTGTTAATAACGCTACTAATGTTGTTATTAAAGTCTGTGAATT |                       |                       |                       |                       |                       |                       |                       |                       |
| Alternaria brassicicola endornavirus isolate 1 NC... (10291) | -----                                                                             |                       |                       |                       |                       |                       |                       |                       |                       |
| Section 280                                                  |                                                                                   |                       |                       |                       |                       |                       |                       |                       |                       |
| (22321)                                                      | <a href="#">22321</a>                                                             | <a href="#">22330</a> | <a href="#">22340</a> | <a href="#">22350</a> | <a href="#">22360</a> | <a href="#">22370</a> | <a href="#">22380</a> | <a href="#">22390</a> | <a href="#">22400</a> |
| SARS-CoV-2 Reference Genome NC_045512.2 (21961)              | TCAATTTTGTAATGATCCATTTTTGGGTGTTTATTACCACAAAAACAACAAAGTTGGATGGAAAGTGAGTTCAGAGTTT   |                       |                       |                       |                       |                       |                       |                       |                       |
| Alternaria brassicicola endornavirus isolate 1 NC... (10291) | -----                                                                             |                       |                       |                       |                       |                       |                       |                       |                       |



## SARS-CoV-2 &amp; Alternaria brassicicola endornavirus.apr

|                                                              |                                                                                    |                       |                       |                       |                       |                       |                       |                       |                       |
|--------------------------------------------------------------|------------------------------------------------------------------------------------|-----------------------|-----------------------|-----------------------|-----------------------|-----------------------|-----------------------|-----------------------|-----------------------|
| Section 281                                                  |                                                                                    |                       |                       |                       |                       |                       |                       |                       |                       |
| (22401)                                                      | <a href="#">22401</a>                                                              | <a href="#">22410</a> | <a href="#">22420</a> | <a href="#">22430</a> | <a href="#">22440</a> | <a href="#">22450</a> | <a href="#">22460</a> | <a href="#">22470</a> | <a href="#">22480</a> |
| SARS-CoV-2 Reference Genome NC_045512.2 (22041)              | ATTCTAGTGCGAATAATTGCACCTTTTGAATATGTCTCTCAGCCTTTTCTTATGGACCTTGAAGGAAAACAGGGTAATTTCT |                       |                       |                       |                       |                       |                       |                       |                       |
| Alternaria brassicicola endornavirus isolate 1 NC... (10291) | -----                                                                              |                       |                       |                       |                       |                       |                       |                       |                       |
| Section 282                                                  |                                                                                    |                       |                       |                       |                       |                       |                       |                       |                       |
| (22481)                                                      | <a href="#">22481</a>                                                              | <a href="#">22490</a> | <a href="#">22500</a> | <a href="#">22510</a> | <a href="#">22520</a> | <a href="#">22530</a> | <a href="#">22540</a> | <a href="#">22550</a> | <a href="#">22560</a> |
| SARS-CoV-2 Reference Genome NC_045512.2 (22121)              | AAAAATCTTAGGGAATTTGTGTTTAAGAATATTGATGGTTATTTTAAATATATTCTAAGCACACGCCTATTAATTTAGT    |                       |                       |                       |                       |                       |                       |                       |                       |
| Alternaria brassicicola endornavirus isolate 1 NC... (10291) | -----                                                                              |                       |                       |                       |                       |                       |                       |                       |                       |
| Section 283                                                  |                                                                                    |                       |                       |                       |                       |                       |                       |                       |                       |
| (22561)                                                      | <a href="#">22561</a>                                                              | <a href="#">22570</a> | <a href="#">22580</a> | <a href="#">22590</a> | <a href="#">22600</a> | <a href="#">22610</a> | <a href="#">22620</a> | <a href="#">22630</a> | <a href="#">22640</a> |
| SARS-CoV-2 Reference Genome NC_045512.2 (22201)              | GCGTGATCTCCCTCAGGGTTTTTCGGCTTTAGAACCATTGGTAGATTTGCCAATAGGTATTAACATCACTAGGTTTCAAA   |                       |                       |                       |                       |                       |                       |                       |                       |
| Alternaria brassicicola endornavirus isolate 1 NC... (10291) | -----                                                                              |                       |                       |                       |                       |                       |                       |                       |                       |
| Section 284                                                  |                                                                                    |                       |                       |                       |                       |                       |                       |                       |                       |
| (22641)                                                      | <a href="#">22641</a>                                                              | <a href="#">22650</a> | <a href="#">22660</a> | <a href="#">22670</a> | <a href="#">22680</a> | <a href="#">22690</a> | <a href="#">22700</a> | <a href="#">22710</a> | <a href="#">22720</a> |
| SARS-CoV-2 Reference Genome NC_045512.2 (22281)              | CTTTACTTGCTTTACATAGAAGTTATTTGACTCCTGGTGATTCTTCTTCAGGTTGGACAGCTGGTGCTGCAGCTTATTAT   |                       |                       |                       |                       |                       |                       |                       |                       |
| Alternaria brassicicola endornavirus isolate 1 NC... (10291) | -----                                                                              |                       |                       |                       |                       |                       |                       |                       |                       |
| Section 285                                                  |                                                                                    |                       |                       |                       |                       |                       |                       |                       |                       |
| (22721)                                                      | <a href="#">22721</a>                                                              | <a href="#">22730</a> | <a href="#">22740</a> | <a href="#">22750</a> | <a href="#">22760</a> | <a href="#">22770</a> | <a href="#">22780</a> | <a href="#">22790</a> | <a href="#">22800</a> |
| SARS-CoV-2 Reference Genome NC_045512.2 (22361)              | GTGGGTTATCTTCAACCTAGGACTTTTCTATTAAAAATATAATGAAAATGGAACCATTACAGATGCTGTAGACTGTGCACT  |                       |                       |                       |                       |                       |                       |                       |                       |
| Alternaria brassicicola endornavirus isolate 1 NC... (10291) | -----                                                                              |                       |                       |                       |                       |                       |                       |                       |                       |
| Section 286                                                  |                                                                                    |                       |                       |                       |                       |                       |                       |                       |                       |
| (22801)                                                      | <a href="#">22801</a>                                                              | <a href="#">22810</a> | <a href="#">22820</a> | <a href="#">22830</a> | <a href="#">22840</a> | <a href="#">22850</a> | <a href="#">22860</a> | <a href="#">22870</a> | <a href="#">22880</a> |
| SARS-CoV-2 Reference Genome NC_045512.2 (22441)              | TGACCCCTCTCTCAGAAACAAAGTGACGTTGAAATCCTTCACTGTAGAAAAAGGAATCTATCAAACCTTCTAACTTTAGAG  |                       |                       |                       |                       |                       |                       |                       |                       |
| Alternaria brassicicola endornavirus isolate 1 NC... (10291) | -----                                                                              |                       |                       |                       |                       |                       |                       |                       |                       |
| Section 287                                                  |                                                                                    |                       |                       |                       |                       |                       |                       |                       |                       |
| (22881)                                                      | <a href="#">22881</a>                                                              | <a href="#">22890</a> | <a href="#">22900</a> | <a href="#">22910</a> | <a href="#">22920</a> | <a href="#">22930</a> | <a href="#">22940</a> | <a href="#">22950</a> | <a href="#">22960</a> |
| SARS-CoV-2 Reference Genome NC_045512.2 (22521)              | TCCAACCAACAGAATCTATTGTTAGATTTCTAATATTACAAACTTGTGCCCTTTTGGTGAAGTTTTTAACGCCACCAGA    |                       |                       |                       |                       |                       |                       |                       |                       |
| Alternaria brassicicola endornavirus isolate 1 NC... (10291) | -----                                                                              |                       |                       |                       |                       |                       |                       |                       |                       |

## SARS-CoV-2 &amp; Alternaria brassicicola endornavirus.apr

|                                                              |                                                                                    |                       |                       |                       |                       |                       |                       |                       |                       |
|--------------------------------------------------------------|------------------------------------------------------------------------------------|-----------------------|-----------------------|-----------------------|-----------------------|-----------------------|-----------------------|-----------------------|-----------------------|
| Section 288                                                  |                                                                                    |                       |                       |                       |                       |                       |                       |                       |                       |
| (22961)                                                      | <a href="#">22961</a>                                                              | <a href="#">22970</a> | <a href="#">22980</a> | <a href="#">22990</a> | <a href="#">23000</a> | <a href="#">23010</a> | <a href="#">23020</a> | <a href="#">23030</a> | <a href="#">23040</a> |
| SARS-CoV-2 Reference Genome NC_045512.2 (22601)              | TTTGCATCTGTTTATGCTTGGAACAGGAAGAGAATCAGCAACTGTGTTGCTGATTATTCTGTCCTATATAAATTCGCGCATC |                       |                       |                       |                       |                       |                       |                       |                       |
| Alternaria brassicicola endornavirus isolate 1 NC... (10291) | -----                                                                              |                       |                       |                       |                       |                       |                       |                       |                       |
| Section 289                                                  |                                                                                    |                       |                       |                       |                       |                       |                       |                       |                       |
| (23041)                                                      | <a href="#">23041</a>                                                              | <a href="#">23050</a> | <a href="#">23060</a> | <a href="#">23070</a> | <a href="#">23080</a> | <a href="#">23090</a> | <a href="#">23100</a> | <a href="#">23110</a> | <a href="#">23120</a> |
| SARS-CoV-2 Reference Genome NC_045512.2 (22681)              | ATTTTCCACTTTTAAGTGTTATGGAGTGTCTCCTACTAAATTAAATGATCTCTGCTTTACTAATGTCTATGCAGATTTCAT  |                       |                       |                       |                       |                       |                       |                       |                       |
| Alternaria brassicicola endornavirus isolate 1 NC... (10291) | -----                                                                              |                       |                       |                       |                       |                       |                       |                       |                       |
| Section 290                                                  |                                                                                    |                       |                       |                       |                       |                       |                       |                       |                       |
| (23121)                                                      | <a href="#">23121</a>                                                              | <a href="#">23130</a> | <a href="#">23140</a> | <a href="#">23150</a> | <a href="#">23160</a> | <a href="#">23170</a> | <a href="#">23180</a> | <a href="#">23190</a> | <a href="#">23200</a> |
| SARS-CoV-2 Reference Genome NC_045512.2 (22761)              | TTGTAATTAGAGGTGATGAAGTCAGACAAATCGCTCCAGGGCAAACCTGGAAAGATTGCTGATTATAATTATAAATTACCA  |                       |                       |                       |                       |                       |                       |                       |                       |
| Alternaria brassicicola endornavirus isolate 1 NC... (10291) | -----                                                                              |                       |                       |                       |                       |                       |                       |                       |                       |
| Section 291                                                  |                                                                                    |                       |                       |                       |                       |                       |                       |                       |                       |
| (23201)                                                      | <a href="#">23201</a>                                                              | <a href="#">23210</a> | <a href="#">23220</a> | <a href="#">23230</a> | <a href="#">23240</a> | <a href="#">23250</a> | <a href="#">23260</a> | <a href="#">23270</a> | <a href="#">23280</a> |
| SARS-CoV-2 Reference Genome NC_045512.2 (22841)              | GATGATTTTACAGGCTGCGTTATAGCTTGGAATTCTAACAATCTTGATTCTAAGGTTGGTGGTAATTATAATTACCTGTA   |                       |                       |                       |                       |                       |                       |                       |                       |
| Alternaria brassicicola endornavirus isolate 1 NC... (10291) | -----                                                                              |                       |                       |                       |                       |                       |                       |                       |                       |
| Section 292                                                  |                                                                                    |                       |                       |                       |                       |                       |                       |                       |                       |
| (23281)                                                      | <a href="#">23281</a>                                                              | <a href="#">23290</a> | <a href="#">23300</a> | <a href="#">23310</a> | <a href="#">23320</a> | <a href="#">23330</a> | <a href="#">23340</a> | <a href="#">23350</a> | <a href="#">23360</a> |
| SARS-CoV-2 Reference Genome NC_045512.2 (22921)              | TAGATTGTTTAGGAAGTCTAATCTCAAACCTTTTGAGAGAGATATTTCAACTGAAATCTATCAGGCCGGTAGCACACCTT   |                       |                       |                       |                       |                       |                       |                       |                       |
| Alternaria brassicicola endornavirus isolate 1 NC... (10291) | -----                                                                              |                       |                       |                       |                       |                       |                       |                       |                       |
| Section 293                                                  |                                                                                    |                       |                       |                       |                       |                       |                       |                       |                       |
| (23361)                                                      | <a href="#">23361</a>                                                              | <a href="#">23370</a> | <a href="#">23380</a> | <a href="#">23390</a> | <a href="#">23400</a> | <a href="#">23410</a> | <a href="#">23420</a> | <a href="#">23430</a> | <a href="#">23440</a> |
| SARS-CoV-2 Reference Genome NC_045512.2 (23001)              | GTAATGGTGTTGAAGGTTTTAATTGTTACTTTTCTTTACAATCATATGGTTTCCAACCCACTAATGGTGTTGGTTACCAA   |                       |                       |                       |                       |                       |                       |                       |                       |
| Alternaria brassicicola endornavirus isolate 1 NC... (10291) | -----                                                                              |                       |                       |                       |                       |                       |                       |                       |                       |
| Section 294                                                  |                                                                                    |                       |                       |                       |                       |                       |                       |                       |                       |
| (23441)                                                      | <a href="#">23441</a>                                                              | <a href="#">23450</a> | <a href="#">23460</a> | <a href="#">23470</a> | <a href="#">23480</a> | <a href="#">23490</a> | <a href="#">23500</a> | <a href="#">23510</a> | <a href="#">23520</a> |
| SARS-CoV-2 Reference Genome NC_045512.2 (23081)              | CCATACAGAGTAGTAGTACTTTCTTTTGAACCTTCTACATGCACCAGCAACTGTTTGTGGACCTAAAAAGTCTACTAATTT  |                       |                       |                       |                       |                       |                       |                       |                       |
| Alternaria brassicicola endornavirus isolate 1 NC... (10291) | -----                                                                              |                       |                       |                       |                       |                       |                       |                       |                       |

## SARS-CoV-2 &amp; Alternaria brassicicola endornavirus.apr

|                                                              |                                                                                   |                       |                       |                       |                       |                       |                       |                       |                       |
|--------------------------------------------------------------|-----------------------------------------------------------------------------------|-----------------------|-----------------------|-----------------------|-----------------------|-----------------------|-----------------------|-----------------------|-----------------------|
| Section 295                                                  |                                                                                   |                       |                       |                       |                       |                       |                       |                       |                       |
| (23521)                                                      | <a href="#">23521</a>                                                             | <a href="#">23530</a> | <a href="#">23540</a> | <a href="#">23550</a> | <a href="#">23560</a> | <a href="#">23570</a> | <a href="#">23580</a> | <a href="#">23590</a> | <a href="#">23600</a> |
| SARS-CoV-2 Reference Genome NC_045512.2 (23161)              | GGTTAAAAACAAATGTGTCAATTTCAACTTCAATGGTTTAAACAGGCACAGGTGTTCTTACTGAGTCTAACAAAAAGTTTC |                       |                       |                       |                       |                       |                       |                       |                       |
| Alternaria brassicicola endornavirus isolate 1 NC... (10291) | -----                                                                             |                       |                       |                       |                       |                       |                       |                       |                       |
| Section 296                                                  |                                                                                   |                       |                       |                       |                       |                       |                       |                       |                       |
| (23601)                                                      | <a href="#">23601</a>                                                             | <a href="#">23610</a> | <a href="#">23620</a> | <a href="#">23630</a> | <a href="#">23640</a> | <a href="#">23650</a> | <a href="#">23660</a> | <a href="#">23670</a> | <a href="#">23680</a> |
| SARS-CoV-2 Reference Genome NC_045512.2 (23241)              | TGCCTTTCCAACAATTTGGCAGAGACATTGCTGACACTACTGATGCTGTCCGTGATCCACAGACACTTGAGATTCTTGAC  |                       |                       |                       |                       |                       |                       |                       |                       |
| Alternaria brassicicola endornavirus isolate 1 NC... (10291) | -----                                                                             |                       |                       |                       |                       |                       |                       |                       |                       |
| Section 297                                                  |                                                                                   |                       |                       |                       |                       |                       |                       |                       |                       |
| (23681)                                                      | <a href="#">23681</a>                                                             | <a href="#">23690</a> | <a href="#">23700</a> | <a href="#">23710</a> | <a href="#">23720</a> | <a href="#">23730</a> | <a href="#">23740</a> | <a href="#">23750</a> | <a href="#">23760</a> |
| SARS-CoV-2 Reference Genome NC_045512.2 (23321)              | ATTACACCATGTTCTTTTGGTGGTGTCAAGTGTATAACACCAGGAACAAATACTTCTAACACAGGTTGCTGTTCTTTATCA |                       |                       |                       |                       |                       |                       |                       |                       |
| Alternaria brassicicola endornavirus isolate 1 NC... (10291) | -----                                                                             |                       |                       |                       |                       |                       |                       |                       |                       |
| Section 298                                                  |                                                                                   |                       |                       |                       |                       |                       |                       |                       |                       |
| (23761)                                                      | <a href="#">23761</a>                                                             | <a href="#">23770</a> | <a href="#">23780</a> | <a href="#">23790</a> | <a href="#">23800</a> | <a href="#">23810</a> | <a href="#">23820</a> | <a href="#">23830</a> | <a href="#">23840</a> |
| SARS-CoV-2 Reference Genome NC_045512.2 (23401)              | GGATGTTAACTGCACAGAAGTCCCTGTTGCTATTTCATGCAGATCAACTTACTCCTACTTGGCGTGTTTATTCTACAGGTT |                       |                       |                       |                       |                       |                       |                       |                       |
| Alternaria brassicicola endornavirus isolate 1 NC... (10291) | -----                                                                             |                       |                       |                       |                       |                       |                       |                       |                       |
| Section 299                                                  |                                                                                   |                       |                       |                       |                       |                       |                       |                       |                       |
| (23841)                                                      | <a href="#">23841</a>                                                             | <a href="#">23850</a> | <a href="#">23860</a> | <a href="#">23870</a> | <a href="#">23880</a> | <a href="#">23890</a> | <a href="#">23900</a> | <a href="#">23910</a> | <a href="#">23920</a> |
| SARS-CoV-2 Reference Genome NC_045512.2 (23481)              | CTAATGTTTTTCAAACACGTGCAGGCTGTTTAATAGGGGCTGAACATGTCAACAACATCATATGAGTGTGACATACCCATT |                       |                       |                       |                       |                       |                       |                       |                       |
| Alternaria brassicicola endornavirus isolate 1 NC... (10291) | -----                                                                             |                       |                       |                       |                       |                       |                       |                       |                       |
| Section 300                                                  |                                                                                   |                       |                       |                       |                       |                       |                       |                       |                       |
| (23921)                                                      | <a href="#">23921</a>                                                             | <a href="#">23930</a> | <a href="#">23940</a> | <a href="#">23950</a> | <a href="#">23960</a> | <a href="#">23970</a> | <a href="#">23980</a> | <a href="#">23990</a> | <a href="#">24000</a> |
| SARS-CoV-2 Reference Genome NC_045512.2 (23561)              | GGTGCAGGTATATGCGCTAGTTATCAGACTCAGACTAATTCTCCTCGGCGGGCACGTAGTGTAGCTAGTCAATCCATCAT  |                       |                       |                       |                       |                       |                       |                       |                       |
| Alternaria brassicicola endornavirus isolate 1 NC... (10291) | -----                                                                             |                       |                       |                       |                       |                       |                       |                       |                       |
| Section 301                                                  |                                                                                   |                       |                       |                       |                       |                       |                       |                       |                       |
| (24001)                                                      | <a href="#">24001</a>                                                             | <a href="#">24010</a> | <a href="#">24020</a> | <a href="#">24030</a> | <a href="#">24040</a> | <a href="#">24050</a> | <a href="#">24060</a> | <a href="#">24070</a> | <a href="#">24080</a> |
| SARS-CoV-2 Reference Genome NC_045512.2 (23641)              | TGCCTACACTATGTCACTTGGTGCAGAAAATTCAGTTGCTTACTCTAATAACTCTATTGCCATACCCACAAATTTTACTA  |                       |                       |                       |                       |                       |                       |                       |                       |
| Alternaria brassicicola endornavirus isolate 1 NC... (10291) | -----                                                                             |                       |                       |                       |                       |                       |                       |                       |                       |

## SARS-CoV-2 &amp; Alternaria brassicicola endornavirus.apr

|                                                              |                                                                                   |                       |                       |                       |                       |                       |                       |                       |                       |
|--------------------------------------------------------------|-----------------------------------------------------------------------------------|-----------------------|-----------------------|-----------------------|-----------------------|-----------------------|-----------------------|-----------------------|-----------------------|
| Section 302                                                  |                                                                                   |                       |                       |                       |                       |                       |                       |                       |                       |
| (24081)                                                      | <a href="#">24081</a>                                                             | <a href="#">24090</a> | <a href="#">24100</a> | <a href="#">24110</a> | <a href="#">24120</a> | <a href="#">24130</a> | <a href="#">24140</a> | <a href="#">24150</a> | <a href="#">24160</a> |
| SARS-CoV-2 Reference Genome NC_045512.2 (23721)              | TTAGTGTTACCACAGAAATTCTACCAGTGTCTATGACCAAGACATCAGTAGATTGTACAATGTACATTTGTGGTGATTCA  |                       |                       |                       |                       |                       |                       |                       |                       |
| Alternaria brassicicola endornavirus isolate 1 NC... (10291) | -----                                                                             |                       |                       |                       |                       |                       |                       |                       |                       |
| Section 303                                                  |                                                                                   |                       |                       |                       |                       |                       |                       |                       |                       |
| (24161)                                                      | <a href="#">24161</a>                                                             | <a href="#">24170</a> | <a href="#">24180</a> | <a href="#">24190</a> | <a href="#">24200</a> | <a href="#">24210</a> | <a href="#">24220</a> | <a href="#">24230</a> | <a href="#">24240</a> |
| SARS-CoV-2 Reference Genome NC_045512.2 (23801)              | ACTGAATGCAGCAATCTTTTGTGCAATATGGCAGTTTTTGTACACAATTAAACCGTGCTTTAACTGGAATAGCTGTTGA   |                       |                       |                       |                       |                       |                       |                       |                       |
| Alternaria brassicicola endornavirus isolate 1 NC... (10291) | -----                                                                             |                       |                       |                       |                       |                       |                       |                       |                       |
| Section 304                                                  |                                                                                   |                       |                       |                       |                       |                       |                       |                       |                       |
| (24241)                                                      | <a href="#">24241</a>                                                             | <a href="#">24250</a> | <a href="#">24260</a> | <a href="#">24270</a> | <a href="#">24280</a> | <a href="#">24290</a> | <a href="#">24300</a> | <a href="#">24310</a> | <a href="#">24320</a> |
| SARS-CoV-2 Reference Genome NC_045512.2 (23881)              | ACAAGACAAAAACACCCAAGAAGTTTTTGCACAAGTCAAACAAATTTACAAAACACCACCAATTAAAGATTTTGGTGTTT  |                       |                       |                       |                       |                       |                       |                       |                       |
| Alternaria brassicicola endornavirus isolate 1 NC... (10291) | -----                                                                             |                       |                       |                       |                       |                       |                       |                       |                       |
| Section 305                                                  |                                                                                   |                       |                       |                       |                       |                       |                       |                       |                       |
| (24321)                                                      | <a href="#">24321</a>                                                             | <a href="#">24330</a> | <a href="#">24340</a> | <a href="#">24350</a> | <a href="#">24360</a> | <a href="#">24370</a> | <a href="#">24380</a> | <a href="#">24390</a> | <a href="#">24400</a> |
| SARS-CoV-2 Reference Genome NC_045512.2 (23961)              | TTAATTTTTTCACAAATATTACCAGATCCATCAAAACCAAGCAAGAGGTCATTTATTGAAGATCTACTTTTCAACAAAGTG |                       |                       |                       |                       |                       |                       |                       |                       |
| Alternaria brassicicola endornavirus isolate 1 NC... (10291) | -----                                                                             |                       |                       |                       |                       |                       |                       |                       |                       |
| Section 306                                                  |                                                                                   |                       |                       |                       |                       |                       |                       |                       |                       |
| (24401)                                                      | <a href="#">24401</a>                                                             | <a href="#">24410</a> | <a href="#">24420</a> | <a href="#">24430</a> | <a href="#">24440</a> | <a href="#">24450</a> | <a href="#">24460</a> | <a href="#">24470</a> | <a href="#">24480</a> |
| SARS-CoV-2 Reference Genome NC_045512.2 (24041)              | ACACTTGCAGATGCTGGCTTCATCAACAATATGGTGATTGCCTTGGTGATATTGCTGCTAGAGACCTCATTGTGCACA    |                       |                       |                       |                       |                       |                       |                       |                       |
| Alternaria brassicicola endornavirus isolate 1 NC... (10291) | -----                                                                             |                       |                       |                       |                       |                       |                       |                       |                       |
| Section 307                                                  |                                                                                   |                       |                       |                       |                       |                       |                       |                       |                       |
| (24481)                                                      | <a href="#">24481</a>                                                             | <a href="#">24490</a> | <a href="#">24500</a> | <a href="#">24510</a> | <a href="#">24520</a> | <a href="#">24530</a> | <a href="#">24540</a> | <a href="#">24550</a> | <a href="#">24560</a> |
| SARS-CoV-2 Reference Genome NC_045512.2 (24121)              | AAAGTTTAAACGGCCTTACTGTTTTGCCACCTTTGCTCACAGATGAAATGATTGCTCAATACACTTCTGCACTGTTAGCGG |                       |                       |                       |                       |                       |                       |                       |                       |
| Alternaria brassicicola endornavirus isolate 1 NC... (10291) | -----                                                                             |                       |                       |                       |                       |                       |                       |                       |                       |
| Section 308                                                  |                                                                                   |                       |                       |                       |                       |                       |                       |                       |                       |
| (24561)                                                      | <a href="#">24561</a>                                                             | <a href="#">24570</a> | <a href="#">24580</a> | <a href="#">24590</a> | <a href="#">24600</a> | <a href="#">24610</a> | <a href="#">24620</a> | <a href="#">24630</a> | <a href="#">24640</a> |
| SARS-CoV-2 Reference Genome NC_045512.2 (24201)              | GTACAATCACTTCTGGTTGGACCTTTGGTGCAGGTGCTGCATTACAAATACCATTTGCTATGCAAATGGCTTATAGGTTT  |                       |                       |                       |                       |                       |                       |                       |                       |
| Alternaria brassicicola endornavirus isolate 1 NC... (10291) | -----                                                                             |                       |                       |                       |                       |                       |                       |                       |                       |

## SARS-CoV-2 &amp; Alternaria brassicicola endornavirus.apr

|                                                              |                                                                                   |                       |                       |                       |                       |                       |                       |                       |                       |
|--------------------------------------------------------------|-----------------------------------------------------------------------------------|-----------------------|-----------------------|-----------------------|-----------------------|-----------------------|-----------------------|-----------------------|-----------------------|
| Section 309                                                  |                                                                                   |                       |                       |                       |                       |                       |                       |                       |                       |
| (24641)                                                      | <a href="#">24641</a>                                                             | <a href="#">24650</a> | <a href="#">24660</a> | <a href="#">24670</a> | <a href="#">24680</a> | <a href="#">24690</a> | <a href="#">24700</a> | <a href="#">24710</a> | <a href="#">24720</a> |
| SARS-CoV-2 Reference Genome NC_045512.2 (24281)              | AATGGTATTGGAGTTACACAGAATGTTCTCTATGAGAACCAAAATTGATTGCCAACCAATTTAATAGTGCTATTGGCAA   |                       |                       |                       |                       |                       |                       |                       |                       |
| Alternaria brassicicola endornavirus isolate 1 NC... (10291) | -----                                                                             |                       |                       |                       |                       |                       |                       |                       |                       |
| Section 310                                                  |                                                                                   |                       |                       |                       |                       |                       |                       |                       |                       |
| (24721)                                                      | <a href="#">24721</a>                                                             | <a href="#">24730</a> | <a href="#">24740</a> | <a href="#">24750</a> | <a href="#">24760</a> | <a href="#">24770</a> | <a href="#">24780</a> | <a href="#">24790</a> | <a href="#">24800</a> |
| SARS-CoV-2 Reference Genome NC_045512.2 (24361)              | AATTCAAGACTCACTTTCTTCCACAGCAAGTGCACCTTGGAACCTTCAAGATGTGGTCAACCAAAATGCACAAGCTTTAA  |                       |                       |                       |                       |                       |                       |                       |                       |
| Alternaria brassicicola endornavirus isolate 1 NC... (10291) | -----                                                                             |                       |                       |                       |                       |                       |                       |                       |                       |
| Section 311                                                  |                                                                                   |                       |                       |                       |                       |                       |                       |                       |                       |
| (24801)                                                      | <a href="#">24801</a>                                                             | <a href="#">24810</a> | <a href="#">24820</a> | <a href="#">24830</a> | <a href="#">24840</a> | <a href="#">24850</a> | <a href="#">24860</a> | <a href="#">24870</a> | <a href="#">24880</a> |
| SARS-CoV-2 Reference Genome NC_045512.2 (24441)              | ACACGCTTGTTAAACAACCTTAGCTCCAATTTTGGTGCAATTTCAAGTGTTTTAAATGATATCCTTTACGTCTTGACAAA  |                       |                       |                       |                       |                       |                       |                       |                       |
| Alternaria brassicicola endornavirus isolate 1 NC... (10291) | -----                                                                             |                       |                       |                       |                       |                       |                       |                       |                       |
| Section 312                                                  |                                                                                   |                       |                       |                       |                       |                       |                       |                       |                       |
| (24881)                                                      | <a href="#">24881</a>                                                             | <a href="#">24890</a> | <a href="#">24900</a> | <a href="#">24910</a> | <a href="#">24920</a> | <a href="#">24930</a> | <a href="#">24940</a> | <a href="#">24950</a> | <a href="#">24960</a> |
| SARS-CoV-2 Reference Genome NC_045512.2 (24521)              | GTTGAGGCTGAAGTGCAAATTGATAGGTTGATCACAGGCAGACTTCAAAGTTTGCAGACATATGTGACTCAACAATTAAT  |                       |                       |                       |                       |                       |                       |                       |                       |
| Alternaria brassicicola endornavirus isolate 1 NC... (10291) | -----                                                                             |                       |                       |                       |                       |                       |                       |                       |                       |
| Section 313                                                  |                                                                                   |                       |                       |                       |                       |                       |                       |                       |                       |
| (24961)                                                      | <a href="#">24961</a>                                                             | <a href="#">24970</a> | <a href="#">24980</a> | <a href="#">24990</a> | <a href="#">25000</a> | <a href="#">25010</a> | <a href="#">25020</a> | <a href="#">25030</a> | <a href="#">25040</a> |
| SARS-CoV-2 Reference Genome NC_045512.2 (24601)              | TAGAGCTGCAGAAATCAGAGCTTCTGCTAATCTTGCTGCTACTAAAATGTCAGAGTGTGTACTTGGACAATCAAAAAGAG  |                       |                       |                       |                       |                       |                       |                       |                       |
| Alternaria brassicicola endornavirus isolate 1 NC... (10291) | -----                                                                             |                       |                       |                       |                       |                       |                       |                       |                       |
| Section 314                                                  |                                                                                   |                       |                       |                       |                       |                       |                       |                       |                       |
| (25041)                                                      | <a href="#">25041</a>                                                             | <a href="#">25050</a> | <a href="#">25060</a> | <a href="#">25070</a> | <a href="#">25080</a> | <a href="#">25090</a> | <a href="#">25100</a> | <a href="#">25110</a> | <a href="#">25120</a> |
| SARS-CoV-2 Reference Genome NC_045512.2 (24681)              | TTGATTTTTGTGGAAAGGGCTATCATCTTATGTCCTTCCCTCAGTCAGCACCTCATGGTGTAGTCTTCTTGCATGTGACT  |                       |                       |                       |                       |                       |                       |                       |                       |
| Alternaria brassicicola endornavirus isolate 1 NC... (10291) | -----                                                                             |                       |                       |                       |                       |                       |                       |                       |                       |
| Section 315                                                  |                                                                                   |                       |                       |                       |                       |                       |                       |                       |                       |
| (25121)                                                      | <a href="#">25121</a>                                                             | <a href="#">25130</a> | <a href="#">25140</a> | <a href="#">25150</a> | <a href="#">25160</a> | <a href="#">25170</a> | <a href="#">25180</a> | <a href="#">25190</a> | <a href="#">25200</a> |
| SARS-CoV-2 Reference Genome NC_045512.2 (24761)              | TATGTCCCTGCACAAGAAAAGAACTTCACAACCTGCTCCTGCCATTTGTCATGATGGAAAAGCACACTTTCCTCGTGAAGG |                       |                       |                       |                       |                       |                       |                       |                       |
| Alternaria brassicicola endornavirus isolate 1 NC... (10291) | -----                                                                             |                       |                       |                       |                       |                       |                       |                       |                       |

## SARS-CoV-2 &amp; Alternaria brassicicola endornavirus.apr

|                                                              |                                                                                   |                       |                       |                       |                       |                       |                       |                       |                       |
|--------------------------------------------------------------|-----------------------------------------------------------------------------------|-----------------------|-----------------------|-----------------------|-----------------------|-----------------------|-----------------------|-----------------------|-----------------------|
| Section 316                                                  |                                                                                   |                       |                       |                       |                       |                       |                       |                       |                       |
| (25201)                                                      | <a href="#">25201</a>                                                             | <a href="#">25210</a> | <a href="#">25220</a> | <a href="#">25230</a> | <a href="#">25240</a> | <a href="#">25250</a> | <a href="#">25260</a> | <a href="#">25270</a> | <a href="#">25280</a> |
| SARS-CoV-2 Reference Genome NC_045512.2 (24841)              | TGTCTTTGTTTCAAATGGCACACACTGGTTTGTAAACACAAAGGAATTTTATGAACCACAAATCATTACTACAGACAACA  |                       |                       |                       |                       |                       |                       |                       |                       |
| Alternaria brassicicola endornavirus isolate 1 NC... (10291) | -----                                                                             |                       |                       |                       |                       |                       |                       |                       |                       |
| Section 317                                                  |                                                                                   |                       |                       |                       |                       |                       |                       |                       |                       |
| (25281)                                                      | <a href="#">25281</a>                                                             | <a href="#">25290</a> | <a href="#">25300</a> | <a href="#">25310</a> | <a href="#">25320</a> | <a href="#">25330</a> | <a href="#">25340</a> | <a href="#">25350</a> | <a href="#">25360</a> |
| SARS-CoV-2 Reference Genome NC_045512.2 (24921)              | CATTTGTGTCTGGTAACTGTGATGTTGTAATAGGAATTGTCAACAACACAGTTTATGATCCTTTGCAACCTGAATTAGAC  |                       |                       |                       |                       |                       |                       |                       |                       |
| Alternaria brassicicola endornavirus isolate 1 NC... (10291) | -----                                                                             |                       |                       |                       |                       |                       |                       |                       |                       |
| Section 318                                                  |                                                                                   |                       |                       |                       |                       |                       |                       |                       |                       |
| (25361)                                                      | <a href="#">25361</a>                                                             | <a href="#">25370</a> | <a href="#">25380</a> | <a href="#">25390</a> | <a href="#">25400</a> | <a href="#">25410</a> | <a href="#">25420</a> | <a href="#">25430</a> | <a href="#">25440</a> |
| SARS-CoV-2 Reference Genome NC_045512.2 (25001)              | TCATTCAAGGAGGAGTTAGATAAAATATTTTAAGAATCATACATCACCAGATGTTGATTTAGGTGACATCTCTGGCATTAA |                       |                       |                       |                       |                       |                       |                       |                       |
| Alternaria brassicicola endornavirus isolate 1 NC... (10291) | -----                                                                             |                       |                       |                       |                       |                       |                       |                       |                       |
| Section 319                                                  |                                                                                   |                       |                       |                       |                       |                       |                       |                       |                       |
| (25441)                                                      | <a href="#">25441</a>                                                             | <a href="#">25450</a> | <a href="#">25460</a> | <a href="#">25470</a> | <a href="#">25480</a> | <a href="#">25490</a> | <a href="#">25500</a> | <a href="#">25510</a> | <a href="#">25520</a> |
| SARS-CoV-2 Reference Genome NC_045512.2 (25081)              | TGCTTCAGTTGTAAACATTCAAAAAGAAATTGACCGCCTCAATGAGGTTGCCAAGAATTTAAATGAATCTCTCATCGATC  |                       |                       |                       |                       |                       |                       |                       |                       |
| Alternaria brassicicola endornavirus isolate 1 NC... (10291) | -----                                                                             |                       |                       |                       |                       |                       |                       |                       |                       |
| Section 320                                                  |                                                                                   |                       |                       |                       |                       |                       |                       |                       |                       |
| (25521)                                                      | <a href="#">25521</a>                                                             | <a href="#">25530</a> | <a href="#">25540</a> | <a href="#">25550</a> | <a href="#">25560</a> | <a href="#">25570</a> | <a href="#">25580</a> | <a href="#">25590</a> | <a href="#">25600</a> |
| SARS-CoV-2 Reference Genome NC_045512.2 (25161)              | TCCAAGAACTTGGAAAGTATGAGCAGTATATAAAATGGCCATGGTACATTTGGCTAGGTTTTATAGCTGGCTTGATTGCC  |                       |                       |                       |                       |                       |                       |                       |                       |
| Alternaria brassicicola endornavirus isolate 1 NC... (10291) | -----                                                                             |                       |                       |                       |                       |                       |                       |                       |                       |
| Section 321                                                  |                                                                                   |                       |                       |                       |                       |                       |                       |                       |                       |
| (25601)                                                      | <a href="#">25601</a>                                                             | <a href="#">25610</a> | <a href="#">25620</a> | <a href="#">25630</a> | <a href="#">25640</a> | <a href="#">25650</a> | <a href="#">25660</a> | <a href="#">25670</a> | <a href="#">25680</a> |
| SARS-CoV-2 Reference Genome NC_045512.2 (25241)              | ATAGTAATGGTGACAATTATGCTTTGCTGTATGACCAGTTGCTGTAGTTGTCTCAAGGGCTGTTGTTCTTGTGGATCCTG  |                       |                       |                       |                       |                       |                       |                       |                       |
| Alternaria brassicicola endornavirus isolate 1 NC... (10291) | -----                                                                             |                       |                       |                       |                       |                       |                       |                       |                       |
| Section 322                                                  |                                                                                   |                       |                       |                       |                       |                       |                       |                       |                       |
| (25681)                                                      | <a href="#">25681</a>                                                             | <a href="#">25690</a> | <a href="#">25700</a> | <a href="#">25710</a> | <a href="#">25720</a> | <a href="#">25730</a> | <a href="#">25740</a> | <a href="#">25750</a> | <a href="#">25760</a> |
| SARS-CoV-2 Reference Genome NC_045512.2 (25321)              | CTGCAAATTTGATGAAGACGACTCTGAGCCAGTGCTCAAAGGAGTCAAATTACATTACATAAACGAACCTTATGGATTT   |                       |                       |                       |                       |                       |                       |                       |                       |
| Alternaria brassicicola endornavirus isolate 1 NC... (10291) | -----                                                                             |                       |                       |                       |                       |                       |                       |                       |                       |

## SARS-CoV-2 &amp; Alternaria brassicicola endornavirus.apr

|                                                      |         |                                                                                  |                       |                       |                       |                       |                       |                       |                       |                       |
|------------------------------------------------------|---------|----------------------------------------------------------------------------------|-----------------------|-----------------------|-----------------------|-----------------------|-----------------------|-----------------------|-----------------------|-----------------------|
|                                                      |         |                                                                                  |                       |                       |                       |                       |                       |                       |                       | Section 323           |
|                                                      | (25761) | <a href="#">25761</a>                                                            | <a href="#">25770</a> | <a href="#">25780</a> | <a href="#">25790</a> | <a href="#">25800</a> | <a href="#">25810</a> | <a href="#">25820</a> | <a href="#">25830</a> | <a href="#">25840</a> |
| SARS-CoV-2 Reference Genome NC_045512.2              | (25401) | GTTTATGAGAATCTTCACAATTGGAAGTGTAACTTTGAAGCAAGGTGAAATCAAGGATGCTACTCCTTCAGATTTTGTTT |                       |                       |                       |                       |                       |                       |                       |                       |
| Alternaria brassicicola endornavirus isolate 1 NC... | (10291) | -----                                                                            |                       |                       |                       |                       |                       |                       |                       |                       |
|                                                      |         |                                                                                  |                       |                       |                       |                       |                       |                       |                       | Section 324           |
|                                                      | (25841) | <a href="#">25841</a>                                                            | <a href="#">25850</a> | <a href="#">25860</a> | <a href="#">25870</a> | <a href="#">25880</a> | <a href="#">25890</a> | <a href="#">25900</a> | <a href="#">25910</a> | <a href="#">25920</a> |
| SARS-CoV-2 Reference Genome NC_045512.2              | (25481) | GCGCTACTGCAACGATACCGATACAAGCCTCACTCCCTTCGGATGGCTTATTGTTGGCGTTGCACCTTCTTGCTGTTTTT |                       |                       |                       |                       |                       |                       |                       |                       |
| Alternaria brassicicola endornavirus isolate 1 NC... | (10291) | -----                                                                            |                       |                       |                       |                       |                       |                       |                       |                       |
|                                                      |         |                                                                                  |                       |                       |                       |                       |                       |                       |                       | Section 325           |
|                                                      | (25921) | <a href="#">25921</a>                                                            | <a href="#">25930</a> | <a href="#">25940</a> | <a href="#">25950</a> | <a href="#">25960</a> | <a href="#">25970</a> | <a href="#">25980</a> | <a href="#">25990</a> | <a href="#">26000</a> |
| SARS-CoV-2 Reference Genome NC_045512.2              | (25561) | CAGAGCGCTTCCAAAATCATAACCCTCAAAAAGAGATGGCAACTAGCACTCTCCAAGGGTGTTCACTTTGTTTGCAACTT |                       |                       |                       |                       |                       |                       |                       |                       |
| Alternaria brassicicola endornavirus isolate 1 NC... | (10291) | -----                                                                            |                       |                       |                       |                       |                       |                       |                       |                       |
|                                                      |         |                                                                                  |                       |                       |                       |                       |                       |                       |                       | Section 326           |
|                                                      | (26001) | <a href="#">26001</a>                                                            | <a href="#">26010</a> | <a href="#">26020</a> | <a href="#">26030</a> | <a href="#">26040</a> | <a href="#">26050</a> | <a href="#">26060</a> | <a href="#">26070</a> | <a href="#">26080</a> |
| SARS-CoV-2 Reference Genome NC_045512.2              | (25641) | GCTGTTGTTGTTTGTAACAGTTTACTCACACCTTTTGCTCGTTGCTGCTGGCCTTGAAGCCCTTTTCTCTATCTTTATG  |                       |                       |                       |                       |                       |                       |                       |                       |
| Alternaria brassicicola endornavirus isolate 1 NC... | (10291) | -----                                                                            |                       |                       |                       |                       |                       |                       |                       |                       |
|                                                      |         |                                                                                  |                       |                       |                       |                       |                       |                       |                       | Section 327           |
|                                                      | (26081) | <a href="#">26081</a>                                                            | <a href="#">26090</a> | <a href="#">26100</a> | <a href="#">26110</a> | <a href="#">26120</a> | <a href="#">26130</a> | <a href="#">26140</a> | <a href="#">26150</a> | <a href="#">26160</a> |
| SARS-CoV-2 Reference Genome NC_045512.2              | (25721) | CTTTAGTCTACTTCTTGCAGAGTATAAACTTTGTAAGAATAATAATGAGGCTTTGGCTTTGCTGGAAATGCCGTTCCAAA |                       |                       |                       |                       |                       |                       |                       |                       |
| Alternaria brassicicola endornavirus isolate 1 NC... | (10291) | -----                                                                            |                       |                       |                       |                       |                       |                       |                       |                       |
|                                                      |         |                                                                                  |                       |                       |                       |                       |                       |                       |                       | Section 328           |
|                                                      | (26161) | <a href="#">26161</a>                                                            | <a href="#">26170</a> | <a href="#">26180</a> | <a href="#">26190</a> | <a href="#">26200</a> | <a href="#">26210</a> | <a href="#">26220</a> | <a href="#">26230</a> | <a href="#">26240</a> |
| SARS-CoV-2 Reference Genome NC_045512.2              | (25801) | AACCCATTACTTTATGATGCCAATATTTTCTTTGCTGGCATACTAATTGTTACGACTATTGTATACCTTACAATAGTGT  |                       |                       |                       |                       |                       |                       |                       |                       |
| Alternaria brassicicola endornavirus isolate 1 NC... | (10291) | -----                                                                            |                       |                       |                       |                       |                       |                       |                       |                       |
|                                                      |         |                                                                                  |                       |                       |                       |                       |                       |                       |                       | Section 329           |
|                                                      | (26241) | <a href="#">26241</a>                                                            | <a href="#">26250</a> | <a href="#">26260</a> | <a href="#">26270</a> | <a href="#">26280</a> | <a href="#">26290</a> | <a href="#">26300</a> | <a href="#">26310</a> | <a href="#">26320</a> |
| SARS-CoV-2 Reference Genome NC_045512.2              | (25881) | AACTTCTTCAATTGTCATTACTTCAGGTGATGGCACAAAGTCCTATTTCTGAACATGACTACCAGATTGGTGGTTATA   |                       |                       |                       |                       |                       |                       |                       |                       |
| Alternaria brassicicola endornavirus isolate 1 NC... | (10291) | -----                                                                            |                       |                       |                       |                       |                       |                       |                       |                       |

## SARS-CoV-2 &amp; Alternaria brassicicola endornavirus.apr

|                                                              |                                                                                    |                       |                       |                       |                       |                       |                       |                       |                       |
|--------------------------------------------------------------|------------------------------------------------------------------------------------|-----------------------|-----------------------|-----------------------|-----------------------|-----------------------|-----------------------|-----------------------|-----------------------|
| Section 330                                                  |                                                                                    |                       |                       |                       |                       |                       |                       |                       |                       |
| (26321)                                                      | <a href="#">26321</a>                                                              | <a href="#">26330</a> | <a href="#">26340</a> | <a href="#">26350</a> | <a href="#">26360</a> | <a href="#">26370</a> | <a href="#">26380</a> | <a href="#">26390</a> | <a href="#">26400</a> |
| SARS-CoV-2 Reference Genome NC_045512.2 (25961)              | CTGAAAAATGGGAATCTGGAGTAAAAGACTGTGTTGTATTACACAGTTACTTCACTTCAGACTATTACCAGCTGTACTCA   |                       |                       |                       |                       |                       |                       |                       |                       |
| Alternaria brassicicola endornavirus isolate 1 NC... (10291) | -----                                                                              |                       |                       |                       |                       |                       |                       |                       |                       |
| Section 331                                                  |                                                                                    |                       |                       |                       |                       |                       |                       |                       |                       |
| (26401)                                                      | <a href="#">26401</a>                                                              | <a href="#">26410</a> | <a href="#">26420</a> | <a href="#">26430</a> | <a href="#">26440</a> | <a href="#">26450</a> | <a href="#">26460</a> | <a href="#">26470</a> | <a href="#">26480</a> |
| SARS-CoV-2 Reference Genome NC_045512.2 (26041)              | ACTCAATTGAGTACAGACACTGGTGTGAACATGTTACCTTCTTCATCTACAATAAAATTGTTGATGAGCCTGAAGAACA    |                       |                       |                       |                       |                       |                       |                       |                       |
| Alternaria brassicicola endornavirus isolate 1 NC... (10291) | -----                                                                              |                       |                       |                       |                       |                       |                       |                       |                       |
| Section 332                                                  |                                                                                    |                       |                       |                       |                       |                       |                       |                       |                       |
| (26481)                                                      | <a href="#">26481</a>                                                              | <a href="#">26490</a> | <a href="#">26500</a> | <a href="#">26510</a> | <a href="#">26520</a> | <a href="#">26530</a> | <a href="#">26540</a> | <a href="#">26550</a> | <a href="#">26560</a> |
| SARS-CoV-2 Reference Genome NC_045512.2 (26121)              | TGTCCAAATTCACACAATCGACGGTTCATCCGGAGTTGTTAATCCAGTAATGGAACCAATTTATGATGAACCGACGACGA   |                       |                       |                       |                       |                       |                       |                       |                       |
| Alternaria brassicicola endornavirus isolate 1 NC... (10291) | -----                                                                              |                       |                       |                       |                       |                       |                       |                       |                       |
| Section 333                                                  |                                                                                    |                       |                       |                       |                       |                       |                       |                       |                       |
| (26561)                                                      | <a href="#">26561</a>                                                              | <a href="#">26570</a> | <a href="#">26580</a> | <a href="#">26590</a> | <a href="#">26600</a> | <a href="#">26610</a> | <a href="#">26620</a> | <a href="#">26630</a> | <a href="#">26640</a> |
| SARS-CoV-2 Reference Genome NC_045512.2 (26201)              | CTACTAGCGTGCCTTTGTAAGCACAAAGCTGATGAGTACGAACTTATGTACTCATTTCGTTTCGGAAGAGACAGGTACGTTA |                       |                       |                       |                       |                       |                       |                       |                       |
| Alternaria brassicicola endornavirus isolate 1 NC... (10291) | -----                                                                              |                       |                       |                       |                       |                       |                       |                       |                       |
| Section 334                                                  |                                                                                    |                       |                       |                       |                       |                       |                       |                       |                       |
| (26641)                                                      | <a href="#">26641</a>                                                              | <a href="#">26650</a> | <a href="#">26660</a> | <a href="#">26670</a> | <a href="#">26680</a> | <a href="#">26690</a> | <a href="#">26700</a> | <a href="#">26710</a> | <a href="#">26720</a> |
| SARS-CoV-2 Reference Genome NC_045512.2 (26281)              | ATAGTTAATAGCGTACTTCTTTTTCTTGCTTTCGTTGCTAGTTACACTAGCCATCCTTACTGCGCTTCGATT           |                       |                       |                       |                       |                       |                       |                       |                       |
| Alternaria brassicicola endornavirus isolate 1 NC... (10291) | -----                                                                              |                       |                       |                       |                       |                       |                       |                       |                       |
| Section 335                                                  |                                                                                    |                       |                       |                       |                       |                       |                       |                       |                       |
| (26721)                                                      | <a href="#">26721</a>                                                              | <a href="#">26730</a> | <a href="#">26740</a> | <a href="#">26750</a> | <a href="#">26760</a> | <a href="#">26770</a> | <a href="#">26780</a> | <a href="#">26790</a> | <a href="#">26800</a> |
| SARS-CoV-2 Reference Genome NC_045512.2 (26361)              | GTGTGCGTACTGCTGCAATATTGTTAACGTGAGTCTTGTAACCTTCTTTTACGTTTACTCTCGTGTTAAAAATCTGA      |                       |                       |                       |                       |                       |                       |                       |                       |
| Alternaria brassicicola endornavirus isolate 1 NC... (10291) | -----                                                                              |                       |                       |                       |                       |                       |                       |                       |                       |
| Section 336                                                  |                                                                                    |                       |                       |                       |                       |                       |                       |                       |                       |
| (26801)                                                      | <a href="#">26801</a>                                                              | <a href="#">26810</a> | <a href="#">26820</a> | <a href="#">26830</a> | <a href="#">26840</a> | <a href="#">26850</a> | <a href="#">26860</a> | <a href="#">26870</a> | <a href="#">26880</a> |
| SARS-CoV-2 Reference Genome NC_045512.2 (26441)              | ATTCTTCTAGAGTTTCTGATCTTCTGGTCTAAACGAACTAAATATTATATTAGTTTTCTGTTTGGAACTTTAATTTTAG    |                       |                       |                       |                       |                       |                       |                       |                       |
| Alternaria brassicicola endornavirus isolate 1 NC... (10291) | -----                                                                              |                       |                       |                       |                       |                       |                       |                       |                       |



## SARS-CoV-2 &amp; Alternaria brassicicola endornavirus.apr

|                                                              |                                                                                     |                       |                       |                       |                       |                       |                       |                       |                       |
|--------------------------------------------------------------|-------------------------------------------------------------------------------------|-----------------------|-----------------------|-----------------------|-----------------------|-----------------------|-----------------------|-----------------------|-----------------------|
| Section 337                                                  |                                                                                     |                       |                       |                       |                       |                       |                       |                       |                       |
| (26881)                                                      | <a href="#">26881</a>                                                               | <a href="#">26890</a> | <a href="#">26900</a> | <a href="#">26910</a> | <a href="#">26920</a> | <a href="#">26930</a> | <a href="#">26940</a> | <a href="#">26950</a> | <a href="#">26960</a> |
| SARS-CoV-2 Reference Genome NC_045512.2 (26521)              | CCATGGCAGATTCCAACGGTACTATTACCGTTGAAGAGCTTAAAAAGCTCCTTGAACAATGGAACCTAGTAATAGGTTTT    |                       |                       |                       |                       |                       |                       |                       |                       |
| Alternaria brassicicola endornavirus isolate 1 NC... (10291) | -----                                                                               |                       |                       |                       |                       |                       |                       |                       |                       |
| Section 338                                                  |                                                                                     |                       |                       |                       |                       |                       |                       |                       |                       |
| (26961)                                                      | <a href="#">26961</a>                                                               | <a href="#">26970</a> | <a href="#">26980</a> | <a href="#">26990</a> | <a href="#">27000</a> | <a href="#">27010</a> | <a href="#">27020</a> | <a href="#">27030</a> | <a href="#">27040</a> |
| SARS-CoV-2 Reference Genome NC_045512.2 (26601)              | CTATTCCTTACATGGATTTGTCTTCTACAATTTGCCTATGCCAACAGGAATAGGTTTTGTATATAATTAAGTTAATTTT     |                       |                       |                       |                       |                       |                       |                       |                       |
| Alternaria brassicicola endornavirus isolate 1 NC... (10291) | -----                                                                               |                       |                       |                       |                       |                       |                       |                       |                       |
| Section 339                                                  |                                                                                     |                       |                       |                       |                       |                       |                       |                       |                       |
| (27041)                                                      | <a href="#">27041</a>                                                               | <a href="#">27050</a> | <a href="#">27060</a> | <a href="#">27070</a> | <a href="#">27080</a> | <a href="#">27090</a> | <a href="#">27100</a> | <a href="#">27110</a> | <a href="#">27120</a> |
| SARS-CoV-2 Reference Genome NC_045512.2 (26681)              | CCTCTGGCTGTTATGGCCAGTAACTTTAGCTTGTGTTTGTGCTTGCTGCTGTTTACAGAATAAATTGGATCACC GGTTGGAA |                       |                       |                       |                       |                       |                       |                       |                       |
| Alternaria brassicicola endornavirus isolate 1 NC... (10291) | -----                                                                               |                       |                       |                       |                       |                       |                       |                       |                       |
| Section 340                                                  |                                                                                     |                       |                       |                       |                       |                       |                       |                       |                       |
| (27121)                                                      | <a href="#">27121</a>                                                               | <a href="#">27130</a> | <a href="#">27140</a> | <a href="#">27150</a> | <a href="#">27160</a> | <a href="#">27170</a> | <a href="#">27180</a> | <a href="#">27190</a> | <a href="#">27200</a> |
| SARS-CoV-2 Reference Genome NC_045512.2 (26761)              | TTGCTATCGCAATGGCTTGTCTTGTAGGCTTGATGTGGCTCAGCTACTTCATTGCTTCTTTTCAGACTGTTTGC GCGTACG  |                       |                       |                       |                       |                       |                       |                       |                       |
| Alternaria brassicicola endornavirus isolate 1 NC... (10291) | -----                                                                               |                       |                       |                       |                       |                       |                       |                       |                       |
| Section 341                                                  |                                                                                     |                       |                       |                       |                       |                       |                       |                       |                       |
| (27201)                                                      | <a href="#">27201</a>                                                               | <a href="#">27210</a> | <a href="#">27220</a> | <a href="#">27230</a> | <a href="#">27240</a> | <a href="#">27250</a> | <a href="#">27260</a> | <a href="#">27270</a> | <a href="#">27280</a> |
| SARS-CoV-2 Reference Genome NC_045512.2 (26841)              | CGTTCCATGTGGTCATTCAATCCAGAACTAACATTCTTCTCAACGTGCCACTCCATGGCACTATTCTGACCAGACCGCT     |                       |                       |                       |                       |                       |                       |                       |                       |
| Alternaria brassicicola endornavirus isolate 1 NC... (10291) | -----                                                                               |                       |                       |                       |                       |                       |                       |                       |                       |
| Section 342                                                  |                                                                                     |                       |                       |                       |                       |                       |                       |                       |                       |
| (27281)                                                      | <a href="#">27281</a>                                                               | <a href="#">27290</a> | <a href="#">27300</a> | <a href="#">27310</a> | <a href="#">27320</a> | <a href="#">27330</a> | <a href="#">27340</a> | <a href="#">27350</a> | <a href="#">27360</a> |
| SARS-CoV-2 Reference Genome NC_045512.2 (26921)              | TCTAGAAAGTGAACCTCGTAATCGGAGCTGTGATCCTTCGTGGACATCTTCGTATTGCTGGACACCATCTAGGACGCTGTG   |                       |                       |                       |                       |                       |                       |                       |                       |
| Alternaria brassicicola endornavirus isolate 1 NC... (10291) | -----                                                                               |                       |                       |                       |                       |                       |                       |                       |                       |
| Section 343                                                  |                                                                                     |                       |                       |                       |                       |                       |                       |                       |                       |
| (27361)                                                      | <a href="#">27361</a>                                                               | <a href="#">27370</a> | <a href="#">27380</a> | <a href="#">27390</a> | <a href="#">27400</a> | <a href="#">27410</a> | <a href="#">27420</a> | <a href="#">27430</a> | <a href="#">27440</a> |
| SARS-CoV-2 Reference Genome NC_045512.2 (27001)              | ACATCAAGGACCTGCCTAAAGAAATCACTGTTGCTACATCACGAACGCTTTCTTATTACAAATTGGGAGCTTCGCAGCGT    |                       |                       |                       |                       |                       |                       |                       |                       |
| Alternaria brassicicola endornavirus isolate 1 NC... (10291) | -----                                                                               |                       |                       |                       |                       |                       |                       |                       |                       |

## SARS-CoV-2 &amp; Alternaria brassicicola endornavirus.apr

|                                                              |                                                                                    |                       |                       |                       |                       |                       |                       |                       |                       |
|--------------------------------------------------------------|------------------------------------------------------------------------------------|-----------------------|-----------------------|-----------------------|-----------------------|-----------------------|-----------------------|-----------------------|-----------------------|
| Section 344                                                  |                                                                                    |                       |                       |                       |                       |                       |                       |                       |                       |
| (27441)                                                      | <a href="#">27441</a>                                                              | <a href="#">27450</a> | <a href="#">27460</a> | <a href="#">27470</a> | <a href="#">27480</a> | <a href="#">27490</a> | <a href="#">27500</a> | <a href="#">27510</a> | <a href="#">27520</a> |
| SARS-CoV-2 Reference Genome NC_045512.2 (27081)              | GTAGCAGGTGACTCAGGTTTTGCTGCATACAGTCGCTACAGGATTGGCAACTATAAATTAAACACAGACCATTCCAGTAG   |                       |                       |                       |                       |                       |                       |                       |                       |
| Alternaria brassicicola endornavirus isolate 1 NC... (10291) | -----                                                                              |                       |                       |                       |                       |                       |                       |                       |                       |
| Section 345                                                  |                                                                                    |                       |                       |                       |                       |                       |                       |                       |                       |
| (27521)                                                      | <a href="#">27521</a>                                                              | <a href="#">27530</a> | <a href="#">27540</a> | <a href="#">27550</a> | <a href="#">27560</a> | <a href="#">27570</a> | <a href="#">27580</a> | <a href="#">27590</a> | <a href="#">27600</a> |
| SARS-CoV-2 Reference Genome NC_045512.2 (27161)              | CAGTGACAATATTGCTTTGCTTGTACAGTAAGTGACAACAGATGTTTCATCTCGTTGACTTTTCAGGTTACTATAGCAGAG  |                       |                       |                       |                       |                       |                       |                       |                       |
| Alternaria brassicicola endornavirus isolate 1 NC... (10291) | -----                                                                              |                       |                       |                       |                       |                       |                       |                       |                       |
| Section 346                                                  |                                                                                    |                       |                       |                       |                       |                       |                       |                       |                       |
| (27601)                                                      | <a href="#">27601</a>                                                              | <a href="#">27610</a> | <a href="#">27620</a> | <a href="#">27630</a> | <a href="#">27640</a> | <a href="#">27650</a> | <a href="#">27660</a> | <a href="#">27670</a> | <a href="#">27680</a> |
| SARS-CoV-2 Reference Genome NC_045512.2 (27241)              | ATATTACTAATTATTATGAGGACTTTTAAAGTTTCCATTTGGAATCTTGATTACATCATAAACCTCATAATTAAAAATTT   |                       |                       |                       |                       |                       |                       |                       |                       |
| Alternaria brassicicola endornavirus isolate 1 NC... (10291) | -----                                                                              |                       |                       |                       |                       |                       |                       |                       |                       |
| Section 347                                                  |                                                                                    |                       |                       |                       |                       |                       |                       |                       |                       |
| (27681)                                                      | <a href="#">27681</a>                                                              | <a href="#">27690</a> | <a href="#">27700</a> | <a href="#">27710</a> | <a href="#">27720</a> | <a href="#">27730</a> | <a href="#">27740</a> | <a href="#">27750</a> | <a href="#">27760</a> |
| SARS-CoV-2 Reference Genome NC_045512.2 (27321)              | ATCTAAGTCACCTAACTGAGAATAAATATTCTCAATTAGATGAAGAGCAACCAATGGAGATTGATTAAACGAACATGAAAA  |                       |                       |                       |                       |                       |                       |                       |                       |
| Alternaria brassicicola endornavirus isolate 1 NC... (10291) | -----                                                                              |                       |                       |                       |                       |                       |                       |                       |                       |
| Section 348                                                  |                                                                                    |                       |                       |                       |                       |                       |                       |                       |                       |
| (27761)                                                      | <a href="#">27761</a>                                                              | <a href="#">27770</a> | <a href="#">27780</a> | <a href="#">27790</a> | <a href="#">27800</a> | <a href="#">27810</a> | <a href="#">27820</a> | <a href="#">27830</a> | <a href="#">27840</a> |
| SARS-CoV-2 Reference Genome NC_045512.2 (27401)              | TTATTCTTTTCTTGGCACTGATAACACTCGCTACTTGTGAGCTTTATCACTACCAAGAGTGTGTTAGAGGTACAACAGTA   |                       |                       |                       |                       |                       |                       |                       |                       |
| Alternaria brassicicola endornavirus isolate 1 NC... (10291) | -----                                                                              |                       |                       |                       |                       |                       |                       |                       |                       |
| Section 349                                                  |                                                                                    |                       |                       |                       |                       |                       |                       |                       |                       |
| (27841)                                                      | <a href="#">27841</a>                                                              | <a href="#">27850</a> | <a href="#">27860</a> | <a href="#">27870</a> | <a href="#">27880</a> | <a href="#">27890</a> | <a href="#">27900</a> | <a href="#">27910</a> | <a href="#">27920</a> |
| SARS-CoV-2 Reference Genome NC_045512.2 (27481)              | CTTTTAAAAGAACCCTTGCTCTTCTGGAACATACGAGGGCAATTCACCATTTTCATCCTCTAGCTGATAACAAATTTGCACT |                       |                       |                       |                       |                       |                       |                       |                       |
| Alternaria brassicicola endornavirus isolate 1 NC... (10291) | -----                                                                              |                       |                       |                       |                       |                       |                       |                       |                       |
| Section 350                                                  |                                                                                    |                       |                       |                       |                       |                       |                       |                       |                       |
| (27921)                                                      | <a href="#">27921</a>                                                              | <a href="#">27930</a> | <a href="#">27940</a> | <a href="#">27950</a> | <a href="#">27960</a> | <a href="#">27970</a> | <a href="#">27980</a> | <a href="#">27990</a> | <a href="#">28000</a> |
| SARS-CoV-2 Reference Genome NC_045512.2 (27561)              | GACTTGCTTTAGCACTCAATTTGCTTTTGCTTGTCTGACGGCGTAAACACGTCTATCAGTTACGTGCCAGATCAGTTT     |                       |                       |                       |                       |                       |                       |                       |                       |
| Alternaria brassicicola endornavirus isolate 1 NC... (10291) | -----                                                                              |                       |                       |                       |                       |                       |                       |                       |                       |

## SARS-CoV-2 &amp; Alternaria brassicicola endornavirus.apr

|                                                              |                                                                                   |                       |                       |                       |                       |                       |                       |                       |                       |
|--------------------------------------------------------------|-----------------------------------------------------------------------------------|-----------------------|-----------------------|-----------------------|-----------------------|-----------------------|-----------------------|-----------------------|-----------------------|
| Section 351                                                  |                                                                                   |                       |                       |                       |                       |                       |                       |                       |                       |
| (28001)                                                      | <a href="#">28001</a>                                                             | <a href="#">28010</a> | <a href="#">28020</a> | <a href="#">28030</a> | <a href="#">28040</a> | <a href="#">28050</a> | <a href="#">28060</a> | <a href="#">28070</a> | <a href="#">28080</a> |
| SARS-CoV-2 Reference Genome NC_045512.2 (27641)              | CACCTAAACTGTTTCATCAGACAAGAGGAAGTTCAAGAACTTTACTCTCCAATTTTCTTATTGTTGCGGCAATAGTGTTT  |                       |                       |                       |                       |                       |                       |                       |                       |
| Alternaria brassicicola endornavirus isolate 1 NC... (10291) | -----                                                                             |                       |                       |                       |                       |                       |                       |                       |                       |
| Section 352                                                  |                                                                                   |                       |                       |                       |                       |                       |                       |                       |                       |
| (28081)                                                      | <a href="#">28081</a>                                                             | <a href="#">28090</a> | <a href="#">28100</a> | <a href="#">28110</a> | <a href="#">28120</a> | <a href="#">28130</a> | <a href="#">28140</a> | <a href="#">28150</a> | <a href="#">28160</a> |
| SARS-CoV-2 Reference Genome NC_045512.2 (27771)              | ATAACACTTTGCTTCACACTCAAAAGAAAGACAGAATGATTGAACTTTCATTAATTGACTTCTATTTGTGCTTTTTAGCC  |                       |                       |                       |                       |                       |                       |                       |                       |
| Alternaria brassicicola endornavirus isolate 1 NC... (10291) | -----                                                                             |                       |                       |                       |                       |                       |                       |                       |                       |
| Section 353                                                  |                                                                                   |                       |                       |                       |                       |                       |                       |                       |                       |
| (28161)                                                      | <a href="#">28161</a>                                                             | <a href="#">28170</a> | <a href="#">28180</a> | <a href="#">28190</a> | <a href="#">28200</a> | <a href="#">28210</a> | <a href="#">28220</a> | <a href="#">28230</a> | <a href="#">28240</a> |
| SARS-CoV-2 Reference Genome NC_045512.2 (27801)              | TTTCTGCTATTCCCTTGTTTTAATTATGCTTATTATCTTTGGTTCTCACTTGAAGTCAAGATCATAATGAACTTGTC     |                       |                       |                       |                       |                       |                       |                       |                       |
| Alternaria brassicicola endornavirus isolate 1 NC... (10291) | -----                                                                             |                       |                       |                       |                       |                       |                       |                       |                       |
| Section 354                                                  |                                                                                   |                       |                       |                       |                       |                       |                       |                       |                       |
| (28241)                                                      | <a href="#">28241</a>                                                             | <a href="#">28250</a> | <a href="#">28260</a> | <a href="#">28270</a> | <a href="#">28280</a> | <a href="#">28290</a> | <a href="#">28300</a> | <a href="#">28310</a> | <a href="#">28320</a> |
| SARS-CoV-2 Reference Genome NC_045512.2 (27881)              | CGCCTAAACGAACATGAAATTTCTTGTTTTCTTAGGAATCATCACAACCTGTAGCTGCATTTACCAAGAATGTAGTTTAC  |                       |                       |                       |                       |                       |                       |                       |                       |
| Alternaria brassicicola endornavirus isolate 1 NC... (10291) | -----                                                                             |                       |                       |                       |                       |                       |                       |                       |                       |
| Section 355                                                  |                                                                                   |                       |                       |                       |                       |                       |                       |                       |                       |
| (28321)                                                      | <a href="#">28321</a>                                                             | <a href="#">28330</a> | <a href="#">28340</a> | <a href="#">28350</a> | <a href="#">28360</a> | <a href="#">28370</a> | <a href="#">28380</a> | <a href="#">28390</a> | <a href="#">28400</a> |
| SARS-CoV-2 Reference Genome NC_045512.2 (27961)              | AGTCATGTACTCAACATCAACCATATGTAGTTGATGACCCGTGTCCTATTCACCTTCTATTCTAAATGGTATATTAGAGTA |                       |                       |                       |                       |                       |                       |                       |                       |
| Alternaria brassicicola endornavirus isolate 1 NC... (10291) | -----                                                                             |                       |                       |                       |                       |                       |                       |                       |                       |
| Section 356                                                  |                                                                                   |                       |                       |                       |                       |                       |                       |                       |                       |
| (28401)                                                      | <a href="#">28401</a>                                                             | <a href="#">28410</a> | <a href="#">28420</a> | <a href="#">28430</a> | <a href="#">28440</a> | <a href="#">28450</a> | <a href="#">28460</a> | <a href="#">28470</a> | <a href="#">28480</a> |
| SARS-CoV-2 Reference Genome NC_045512.2 (28041)              | GGAGCTAGAAAATCAGCACCTTTAATTGAATTGTGCGTGGATGAGGCTGGTTCTAAATCACCCATTACAGTACATCGATAT |                       |                       |                       |                       |                       |                       |                       |                       |
| Alternaria brassicicola endornavirus isolate 1 NC... (10291) | -----                                                                             |                       |                       |                       |                       |                       |                       |                       |                       |
| Section 357                                                  |                                                                                   |                       |                       |                       |                       |                       |                       |                       |                       |
| (28481)                                                      | <a href="#">28481</a>                                                             | <a href="#">28490</a> | <a href="#">28500</a> | <a href="#">28510</a> | <a href="#">28520</a> | <a href="#">28530</a> | <a href="#">28540</a> | <a href="#">28550</a> | <a href="#">28560</a> |
| SARS-CoV-2 Reference Genome NC_045512.2 (28121)              | CGGTAATTATACAGTTTCCTGTTTACCTTTTACAATTAATTGCCAGGAACCTAAATTGGGTAGTCTTGTTAGTGCGTTGTT |                       |                       |                       |                       |                       |                       |                       |                       |
| Alternaria brassicicola endornavirus isolate 1 NC... (10291) | -----                                                                             |                       |                       |                       |                       |                       |                       |                       |                       |

## SARS-CoV-2 &amp; Alternaria brassicicola endornavirus.apr

|                                                              |                                                                                    |                       |                       |                       |                       |                       |                       |                       |                       |
|--------------------------------------------------------------|------------------------------------------------------------------------------------|-----------------------|-----------------------|-----------------------|-----------------------|-----------------------|-----------------------|-----------------------|-----------------------|
| Section 358                                                  |                                                                                    |                       |                       |                       |                       |                       |                       |                       |                       |
| (28561)                                                      | <a href="#">28561</a>                                                              | <a href="#">28570</a> | <a href="#">28580</a> | <a href="#">28590</a> | <a href="#">28600</a> | <a href="#">28610</a> | <a href="#">28620</a> | <a href="#">28630</a> | <a href="#">28640</a> |
| SARS-CoV-2 Reference Genome NC_045512.2 (28201)              | CGTTCTATGAAGACTTTTTAGAGTATCATGACGTTTCGTGTTGTTTTAGATTTTCATCTAAACGAACAACTAAAATGTCTG  |                       |                       |                       |                       |                       |                       |                       |                       |
| Alternaria brassicicola endornavirus isolate 1 NC... (10291) | -----                                                                              |                       |                       |                       |                       |                       |                       |                       |                       |
| Section 359                                                  |                                                                                    |                       |                       |                       |                       |                       |                       |                       |                       |
| (28641)                                                      | <a href="#">28641</a>                                                              | <a href="#">28650</a> | <a href="#">28660</a> | <a href="#">28670</a> | <a href="#">28680</a> | <a href="#">28690</a> | <a href="#">28700</a> | <a href="#">28710</a> | <a href="#">28720</a> |
| SARS-CoV-2 Reference Genome NC_045512.2 (28281)              | ATAATGGACCCCAAAATCAGCGAAATGCACCCCGCATTACGTTTGGTGGACCCTCAGATTCAACTGGCAGTAACCAGAAT   |                       |                       |                       |                       |                       |                       |                       |                       |
| Alternaria brassicicola endornavirus isolate 1 NC... (10291) | -----                                                                              |                       |                       |                       |                       |                       |                       |                       |                       |
| Section 360                                                  |                                                                                    |                       |                       |                       |                       |                       |                       |                       |                       |
| (28721)                                                      | <a href="#">28721</a>                                                              | <a href="#">28730</a> | <a href="#">28740</a> | <a href="#">28750</a> | <a href="#">28760</a> | <a href="#">28770</a> | <a href="#">28780</a> | <a href="#">28790</a> | <a href="#">28800</a> |
| SARS-CoV-2 Reference Genome NC_045512.2 (28361)              | GGAGAACGCAGTGGGGCGCGATCAAAACAACGTCGGCCCCAAGGTTTACCCAATAATACTGCGTCTTGTTTCACCGCTCT   |                       |                       |                       |                       |                       |                       |                       |                       |
| Alternaria brassicicola endornavirus isolate 1 NC... (10291) | -----                                                                              |                       |                       |                       |                       |                       |                       |                       |                       |
| Section 361                                                  |                                                                                    |                       |                       |                       |                       |                       |                       |                       |                       |
| (28801)                                                      | <a href="#">28801</a>                                                              | <a href="#">28810</a> | <a href="#">28820</a> | <a href="#">28830</a> | <a href="#">28840</a> | <a href="#">28850</a> | <a href="#">28860</a> | <a href="#">28870</a> | <a href="#">28880</a> |
| SARS-CoV-2 Reference Genome NC_045512.2 (28441)              | CACTCAACATGGCAAGGAAGACCTTAAATTCCCTCGAGGACAAGGCGTTCCAATTAACACCAATAGCAGTCCAGATGACC   |                       |                       |                       |                       |                       |                       |                       |                       |
| Alternaria brassicicola endornavirus isolate 1 NC... (10291) | -----                                                                              |                       |                       |                       |                       |                       |                       |                       |                       |
| Section 362                                                  |                                                                                    |                       |                       |                       |                       |                       |                       |                       |                       |
| (28881)                                                      | <a href="#">28881</a>                                                              | <a href="#">28890</a> | <a href="#">28900</a> | <a href="#">28910</a> | <a href="#">28920</a> | <a href="#">28930</a> | <a href="#">28940</a> | <a href="#">28950</a> | <a href="#">28960</a> |
| SARS-CoV-2 Reference Genome NC_045512.2 (28521)              | AAATTGGCTACTACCGAAGAGCTACCAGACGAATTCGTGGTGGTGACGGTAAAATGAAAGATCTCAGTCCAAGATGGTAT   |                       |                       |                       |                       |                       |                       |                       |                       |
| Alternaria brassicicola endornavirus isolate 1 NC... (10291) | -----                                                                              |                       |                       |                       |                       |                       |                       |                       |                       |
| Section 363                                                  |                                                                                    |                       |                       |                       |                       |                       |                       |                       |                       |
| (28961)                                                      | <a href="#">28961</a>                                                              | <a href="#">28970</a> | <a href="#">28980</a> | <a href="#">28990</a> | <a href="#">29000</a> | <a href="#">29010</a> | <a href="#">29020</a> | <a href="#">29030</a> | <a href="#">29040</a> |
| SARS-CoV-2 Reference Genome NC_045512.2 (28601)              | TTCTACTACCTAGGAAGCTGGGCCAGAAGCTGGACTTCCTATGGTGCTAACAAAGACGGCATCATATGGGTTGCAACTGA   |                       |                       |                       |                       |                       |                       |                       |                       |
| Alternaria brassicicola endornavirus isolate 1 NC... (10291) | -----                                                                              |                       |                       |                       |                       |                       |                       |                       |                       |
| Section 364                                                  |                                                                                    |                       |                       |                       |                       |                       |                       |                       |                       |
| (29041)                                                      | <a href="#">29041</a>                                                              | <a href="#">29050</a> | <a href="#">29060</a> | <a href="#">29070</a> | <a href="#">29080</a> | <a href="#">29090</a> | <a href="#">29100</a> | <a href="#">29110</a> | <a href="#">29120</a> |
| SARS-CoV-2 Reference Genome NC_045512.2 (28681)              | GGGAGCCTTGAATACACCAAAAAGATCACATTGGCACCCGCAATCCTGCTAACAAATGCTGCAATCGTGCTACAACTTCCTC |                       |                       |                       |                       |                       |                       |                       |                       |
| Alternaria brassicicola endornavirus isolate 1 NC... (10291) | -----                                                                              |                       |                       |                       |                       |                       |                       |                       |                       |

## SARS-CoV-2 &amp; Alternaria brassicicola endornavirus.apr

|                                                              |                                                                                    |                       |                       |                       |                       |                       |                       |                       |                       |
|--------------------------------------------------------------|------------------------------------------------------------------------------------|-----------------------|-----------------------|-----------------------|-----------------------|-----------------------|-----------------------|-----------------------|-----------------------|
| Section 365                                                  |                                                                                    |                       |                       |                       |                       |                       |                       |                       |                       |
| (29121)                                                      | <a href="#">29121</a>                                                              | <a href="#">29130</a> | <a href="#">29140</a> | <a href="#">29150</a> | <a href="#">29160</a> | <a href="#">29170</a> | <a href="#">29180</a> | <a href="#">29190</a> | <a href="#">29200</a> |
| SARS-CoV-2 Reference Genome NC_045512.2 (28761)              | AAGGAACAACATTGCCAAAAGGCTTCTACGCAGAAGGGAGCAGAGGCGGCAGTCAAGCCTCTTCTCGTTCTCTCATCACGT  |                       |                       |                       |                       |                       |                       |                       |                       |
| Alternaria brassicicola endornavirus isolate 1 NC... (10291) | -----                                                                              |                       |                       |                       |                       |                       |                       |                       |                       |
| Section 366                                                  |                                                                                    |                       |                       |                       |                       |                       |                       |                       |                       |
| (29201)                                                      | <a href="#">29201</a>                                                              | <a href="#">29210</a> | <a href="#">29220</a> | <a href="#">29230</a> | <a href="#">29240</a> | <a href="#">29250</a> | <a href="#">29260</a> | <a href="#">29270</a> | <a href="#">29280</a> |
| SARS-CoV-2 Reference Genome NC_045512.2 (28841)              | AGTCGCAACAGTTCAAGAAATTCAACTCCAGGCAGCAGTAGGGGAAGCTTCTCCTGCTAGAAATGGCTGGCAATGGCGGTGA |                       |                       |                       |                       |                       |                       |                       |                       |
| Alternaria brassicicola endornavirus isolate 1 NC... (10291) | -----                                                                              |                       |                       |                       |                       |                       |                       |                       |                       |
| Section 367                                                  |                                                                                    |                       |                       |                       |                       |                       |                       |                       |                       |
| (29281)                                                      | <a href="#">29281</a>                                                              | <a href="#">29290</a> | <a href="#">29300</a> | <a href="#">29310</a> | <a href="#">29320</a> | <a href="#">29330</a> | <a href="#">29340</a> | <a href="#">29350</a> | <a href="#">29360</a> |
| SARS-CoV-2 Reference Genome NC_045512.2 (28921)              | TGCTGCTCTTGCTTTGCTGCTGCTTGACAGATTGAACCAGCTTGAGAGCAAAATGTCTGGTAAAGGCCAACACAACAAG    |                       |                       |                       |                       |                       |                       |                       |                       |
| Alternaria brassicicola endornavirus isolate 1 NC... (10291) | -----                                                                              |                       |                       |                       |                       |                       |                       |                       |                       |
| Section 368                                                  |                                                                                    |                       |                       |                       |                       |                       |                       |                       |                       |
| (29361)                                                      | <a href="#">29361</a>                                                              | <a href="#">29370</a> | <a href="#">29380</a> | <a href="#">29390</a> | <a href="#">29400</a> | <a href="#">29410</a> | <a href="#">29420</a> | <a href="#">29430</a> | <a href="#">29440</a> |
| SARS-CoV-2 Reference Genome NC_045512.2 (29001)              | GCCAAACTGTCACTAAGAAATCTGCTGCTGAGGCTTCTAAGAAGCCTCGGCCAAAACGTACTGCCACTAAAGCATACAAT   |                       |                       |                       |                       |                       |                       |                       |                       |
| Alternaria brassicicola endornavirus isolate 1 NC... (10291) | -----                                                                              |                       |                       |                       |                       |                       |                       |                       |                       |
| Section 369                                                  |                                                                                    |                       |                       |                       |                       |                       |                       |                       |                       |
| (29441)                                                      | <a href="#">29441</a>                                                              | <a href="#">29450</a> | <a href="#">29460</a> | <a href="#">29470</a> | <a href="#">29480</a> | <a href="#">29490</a> | <a href="#">29500</a> | <a href="#">29510</a> | <a href="#">29520</a> |
| SARS-CoV-2 Reference Genome NC_045512.2 (29081)              | GTAACACAAGCTTTCGGCAGACGTGGTCCAGAACAAACCAAGGAAATTTTGGGGACCAGGAAGTAATCAGACAAGGAAC    |                       |                       |                       |                       |                       |                       |                       |                       |
| Alternaria brassicicola endornavirus isolate 1 NC... (10291) | -----                                                                              |                       |                       |                       |                       |                       |                       |                       |                       |
| Section 370                                                  |                                                                                    |                       |                       |                       |                       |                       |                       |                       |                       |
| (29521)                                                      | <a href="#">29521</a>                                                              | <a href="#">29530</a> | <a href="#">29540</a> | <a href="#">29550</a> | <a href="#">29560</a> | <a href="#">29570</a> | <a href="#">29580</a> | <a href="#">29590</a> | <a href="#">29600</a> |
| SARS-CoV-2 Reference Genome NC_045512.2 (29161)              | TGATTACAAACATTGGCCGCAAATTGCACAATTTGCCCCAGCGCTTCAGCGTTCTTCGGAATGTCGCGCATTGGCATGG    |                       |                       |                       |                       |                       |                       |                       |                       |
| Alternaria brassicicola endornavirus isolate 1 NC... (10291) | -----                                                                              |                       |                       |                       |                       |                       |                       |                       |                       |
| Section 371                                                  |                                                                                    |                       |                       |                       |                       |                       |                       |                       |                       |
| (29601)                                                      | <a href="#">29601</a>                                                              | <a href="#">29610</a> | <a href="#">29620</a> | <a href="#">29630</a> | <a href="#">29640</a> | <a href="#">29650</a> | <a href="#">29660</a> | <a href="#">29670</a> | <a href="#">29680</a> |
| SARS-CoV-2 Reference Genome NC_045512.2 (29241)              | AAGTCACACCTTCGGGAACGTGGTTGACCTACACAGGTGCCATCAAATTGGATGACAAAGATCCAAATTTCAAAGATCAA   |                       |                       |                       |                       |                       |                       |                       |                       |
| Alternaria brassicicola endornavirus isolate 1 NC... (10291) | -----                                                                              |                       |                       |                       |                       |                       |                       |                       |                       |

## SARS-CoV-2 &amp; Alternaria brassicicola endornavirus.apr

|                                                      |         |                                                                                   |                       |                       |                       |                       |                       |                       |                                             |
|------------------------------------------------------|---------|-----------------------------------------------------------------------------------|-----------------------|-----------------------|-----------------------|-----------------------|-----------------------|-----------------------|---------------------------------------------|
|                                                      |         | Section 372                                                                       |                       |                       |                       |                       |                       |                       |                                             |
|                                                      | (29681) | <a href="#">29681</a>                                                             | <a href="#">29690</a> | <a href="#">29700</a> | <a href="#">29710</a> | <a href="#">29720</a> | <a href="#">29730</a> | <a href="#">29740</a> | <a href="#">29750</a> <a href="#">29760</a> |
| SARS-CoV-2 Reference Genome NC_045512.2              | (29321) | GTCATTTTGCTGAATAAGCATATTGACGCATACAAAACATTCCCACCAACAGAGCCTAAAAAGGACAAAAAGAAGAAGGC  |                       |                       |                       |                       |                       |                       |                                             |
| Alternaria brassicicola endornavirus isolate 1 NC... | (10291) | -----                                                                             |                       |                       |                       |                       |                       |                       |                                             |
|                                                      |         | Section 373                                                                       |                       |                       |                       |                       |                       |                       |                                             |
|                                                      | (29761) | <a href="#">29761</a>                                                             | <a href="#">29770</a> | <a href="#">29780</a> | <a href="#">29790</a> | <a href="#">29800</a> | <a href="#">29810</a> | <a href="#">29820</a> | <a href="#">29830</a> <a href="#">29840</a> |
| SARS-CoV-2 Reference Genome NC_045512.2              | (29401) | TGATGAAACTCAAGCCTTACCGCAGAGACAGAAGAAACAGCAAACCTGTGACTCTTCTTCCTGCTGCAGATTTGGATGATT |                       |                       |                       |                       |                       |                       |                                             |
| Alternaria brassicicola endornavirus isolate 1 NC... | (10291) | -----                                                                             |                       |                       |                       |                       |                       |                       |                                             |
|                                                      |         | Section 374                                                                       |                       |                       |                       |                       |                       |                       |                                             |
|                                                      | (29841) | <a href="#">29841</a>                                                             | <a href="#">29850</a> | <a href="#">29860</a> | <a href="#">29870</a> | <a href="#">29880</a> | <a href="#">29890</a> | <a href="#">29900</a> | <a href="#">29910</a> <a href="#">29920</a> |
| SARS-CoV-2 Reference Genome NC_045512.2              | (29481) | TCTCCAAACAATTGCAACAATCCATGAGCAGTGCTGACTCAACTCAGGCCTAAACTCATGCAGACCACACAAGGCAGATG  |                       |                       |                       |                       |                       |                       |                                             |
| Alternaria brassicicola endornavirus isolate 1 NC... | (10291) | -----                                                                             |                       |                       |                       |                       |                       |                       |                                             |
|                                                      |         | Section 375                                                                       |                       |                       |                       |                       |                       |                       |                                             |
|                                                      | (29921) | <a href="#">29921</a>                                                             | <a href="#">29930</a> | <a href="#">29940</a> | <a href="#">29950</a> | <a href="#">29960</a> | <a href="#">29970</a> | <a href="#">29980</a> | <a href="#">29990</a> <a href="#">30000</a> |
| SARS-CoV-2 Reference Genome NC_045512.2              | (29561) | GGCTATATAAACGTTTTTCGCTTTTCCGTTTACGATATATAGTCTACTCTTGTGCAGAATGAATTCTCGTAACTACATAGC |                       |                       |                       |                       |                       |                       |                                             |
| Alternaria brassicicola endornavirus isolate 1 NC... | (10291) | -----                                                                             |                       |                       |                       |                       |                       |                       |                                             |
|                                                      |         | Section 376                                                                       |                       |                       |                       |                       |                       |                       |                                             |
|                                                      | (30001) | <a href="#">30001</a>                                                             | <a href="#">30010</a> | <a href="#">30020</a> | <a href="#">30030</a> | <a href="#">30040</a> | <a href="#">30050</a> | <a href="#">30060</a> | <a href="#">30070</a> <a href="#">30080</a> |
| SARS-CoV-2 Reference Genome NC_045512.2              | (29641) | ACAAGTAGATGTAGTTAACTTTAATCTCACATAGCAATCTTAAATCAGTGTGTAACATTAGGGAGGACTTGAAAGAGCCA  |                       |                       |                       |                       |                       |                       |                                             |
| Alternaria brassicicola endornavirus isolate 1 NC... | (10291) | -----                                                                             |                       |                       |                       |                       |                       |                       |                                             |
|                                                      |         | Section 377                                                                       |                       |                       |                       |                       |                       |                       |                                             |
|                                                      | (30081) | <a href="#">30081</a>                                                             | <a href="#">30090</a> | <a href="#">30100</a> | <a href="#">30110</a> | <a href="#">30120</a> | <a href="#">30130</a> | <a href="#">30140</a> | <a href="#">30150</a> <a href="#">30160</a> |
| SARS-CoV-2 Reference Genome NC_045512.2              | (29721) | CCACATTTTCACCGAGGCCACGCGGAGTACGATCGAGTGACAGTGAACAATGCTAGGGAGAGCTGCCTATATGGAAGAG   |                       |                       |                       |                       |                       |                       |                                             |
| Alternaria brassicicola endornavirus isolate 1 NC... | (10291) | -----                                                                             |                       |                       |                       |                       |                       |                       |                                             |
|                                                      |         | Section 378                                                                       |                       |                       |                       |                       |                       |                       |                                             |
|                                                      | (30161) | <a href="#">30161</a>                                                             | <a href="#">30170</a> | <a href="#">30180</a> | <a href="#">30190</a> | <a href="#">30200</a> | <a href="#">30210</a> | <a href="#">30220</a> | <a href="#">30230</a> <a href="#">30240</a> |
| SARS-CoV-2 Reference Genome NC_045512.2              | (29801) | CCCTAATGTGTAAAATTAATTTTAGTAGTGCTATCCCCATGTGATTTTAATAGCTTCTTAGGAGAATGACAAAAAAAAA   |                       |                       |                       |                       |                       |                       |                                             |
| Alternaria brassicicola endornavirus isolate 1 NC... | (10291) | -----                                                                             |                       |                       |                       |                       |                       |                       |                                             |

|                                                      |         |                              |                       |                       |
|------------------------------------------------------|---------|------------------------------|-----------------------|-----------------------|
|                                                      | (30241) | <a href="#">30241</a>        | <a href="#">30250</a> | <a href="#">30263</a> |
| SARS-CoV-2 Reference Genome NC_045512.2              | (29881) | AAAAAAAAAAAAAAAAAAAAAAAAAAAA |                       |                       |
| Alternaria brassicicola endornavirus isolate 1 NC... | (10291) | -----                        |                       |                       |
