# Supplementary material for: Ubiquitous Micro-Modular Homologies among Genomes from Viruses to Bacteria to Human Mitochondrial DNA: Platforms for Recombination during Evolution?
Source: MDPI journal article supplement (doi:10.3390/v14050885), 2022-04-24
Supplement: s1 [file s1]

## SARS-CoV-2 &amp; T4.apr

|                                          |       |                                                                                                    |     |     |     |     |     |     |     |     |     |
|------------------------------------------|-------|----------------------------------------------------------------------------------------------------|-----|-----|-----|-----|-----|-----|-----|-----|-----|
|                                          |       | Section 1                                                                                          |     |     |     |     |     |     |     |     |     |
| T4 NC 000866.4<br>SARS-CoV-2 NC_045512.2 | (1)   | 1                                                                                                  | 11  | 22  | 33  | 44  | 55  | 66  | 77  | 96  |     |
|                                          | (1)   | AATTTTCCTTATTAGGCCGCAAGGGCCTTCATAGTTTTAGCGATTTGGGAACTTCATCATCACTTAAAGAGTTGCGATAACCGATGAAGTCGGAA    |     |     |     |     |     |     |     |     |     |
|                                          | (1)   | -----                                                                                              |     |     |     |     |     |     |     |     |     |
|                                          |       | Section 2                                                                                          |     |     |     |     |     |     |     |     |     |
| T4 NC 000866.4<br>SARS-CoV-2 NC_045512.2 | (97)  | 97                                                                                                 | 110 | 121 | 132 | 143 | 154 | 165 | 176 | 192 |     |
|                                          | (97)  | ACAATACGGAATTTCTTGGTAACTCAGCAACCATTTTATCACTGTTTTTTGAAGCATTATTTGATAATACATCAAAAAGATTAGTTACTGTCCAA    |     |     |     |     |     |     |     |     |     |
|                                          | (1)   | -----                                                                                              |     |     |     |     |     |     |     |     |     |
|                                          |       | Section 3                                                                                          |     |     |     |     |     |     |     |     |     |
| T4 NC 000866.4<br>SARS-CoV-2 NC_045512.2 | (193) | 193                                                                                                | 198 | 209 | 220 | 231 | 242 | 253 | 264 | 275 | 288 |
|                                          | (193) | ATGTCATGACCGATGGTATCTTTTCCACCATTAATAATATACACCCTGTAATGAACCTAACCATATTAGCGAGTCGTGTATATTCTTCAGAAACTTCA |     |     |     |     |     |     |     |     |     |
|                                          | (1)   | -----                                                                                              |     |     |     |     |     |     |     |     |     |
|                                          |       | Section 4                                                                                          |     |     |     |     |     |     |     |     |     |
| T4 NC 000866.4<br>SARS-CoV-2 NC_045512.2 | (289) | 289                                                                                                | 297 | 308 | 319 | 330 | 341 | 352 | 363 | 384 |     |
|                                          | (289) | TCTATACTGAAGTACTTCATCATAAAATCTAACTCAGGATACTTGATAATTTTATCAATATATCGTTTAGCTGAACTTGAATAACCTACATACTTA   |     |     |     |     |     |     |     |     |     |
|                                          | (1)   | -----                                                                                              |     |     |     |     |     |     |     |     |     |
|                                          |       | Section 5                                                                                          |     |     |     |     |     |     |     |     |     |
| T4 NC 000866.4<br>SARS-CoV-2 NC_045512.2 | (385) | 385                                                                                                | 396 | 407 | 418 | 429 | 440 | 451 | 462 | 480 |     |
|                                          | (385) | TCATAATCTACATCATCAAAAGCATCTACATATAAATCACGCAAAGCTTCAAAAATACATTGGCACTGACCGAGTTCTTTTACCTTTTTCTGTAAA   |     |     |     |     |     |     |     |     |     |
|                                          | (1)   | -----                                                                                              |     |     |     |     |     |     |     |     |     |
|                                          |       | Section 6                                                                                          |     |     |     |     |     |     |     |     |     |
| T4 NC 000866.4<br>SARS-CoV-2 NC_045512.2 | (481) | 481                                                                                                | 495 | 506 | 517 | 528 | 539 | 550 | 561 | 576 |     |
|                                          | (481) | AGCGGACGAATAACATAAAATTCATTAATGCCAATAAGATTAGCCATACGAATCAAAATATTCATAGATGGATGACAAAGAGATGTAGTACCATCC   |     |     |     |     |     |     |     |     |     |
|                                          | (1)   | -----                                                                                              |     |     |     |     |     |     |     |     |     |
|                                          |       | Section 7                                                                                          |     |     |     |     |     |     |     |     |     |
| T4 NC 000866.4<br>SARS-CoV-2 NC_045512.2 | (577) | 577                                                                                                | 583 | 594 | 605 | 616 | 627 | 638 | 649 | 660 | 672 |
|                                          | (577) | ATAGAGAAAAATATCAGAACGATGCATATACGCTACATAACCAGTAATTTTCATCTGCTTCTGATGTGAGGCGTAAATAATTCCTCTTTTCCCAGCGC |     |     |     |     |     |     |     |     |     |
|                                          | (1)   | -----                                                                                              |     |     |     |     |     |     |     |     |     |

## SARS-CoV-2 &amp; T4.apr

|                                          |        |                                                                                                    |      |      |      |      |      |      |      |      |      |
|------------------------------------------|--------|----------------------------------------------------------------------------------------------------|------|------|------|------|------|------|------|------|------|
|                                          |        | Section 8                                                                                          |      |      |      |      |      |      |      |      |      |
| T4 NC 000866.4<br>SARS-CoV-2 NC_045512.2 | (673)  | 673                                                                                                | 682  | 693  | 704  | 715  | 726  | 737  | 748  | 768  |      |
|                                          | (673)  | CCGTCCTTTAATTTCAAACCTTAAACGCTGTAGCAGCTTTAGGACGAGGAGCTTTACTTTTAACTACCTTTGGAATATAACTTTTTACTAAAGCTTCA |      |      |      |      |      |      |      |      |      |
|                                          | (1)    | -----                                                                                              |      |      |      |      |      |      |      |      |      |
|                                          |        | Section 9                                                                                          |      |      |      |      |      |      |      |      |      |
| T4 NC 000866.4<br>SARS-CoV-2 NC_045512.2 | (769)  | 769                                                                                                | 781  | 792  | 803  | 814  | 825  | 836  | 847  | 864  |      |
|                                          | (769)  | ATTTCTGACAAATAATGAATGTAACTTCATCACTTTCAAACATCGCCATAATATCAGGAAGCAAATCAATCTGCGATTCTACTTCTGGATTAATA    |      |      |      |      |      |      |      |      |      |
|                                          | (1)    | -----                                                                                              |      |      |      |      |      |      |      |      |      |
|                                          |        | Section 10                                                                                         |      |      |      |      |      |      |      |      |      |
| T4 NC 000866.4<br>SARS-CoV-2 NC_045512.2 | (865)  | 865                                                                                                | 880  | 891  | 902  | 913  | 924  | 935  | 946  | 960  |      |
|                                          | (865)  | AACAGAAGACGTTTCGTTATGATGAATATTCAAAGTGTTATTAAATTCACATCATCTAACGCACGTGCTAATCCACGGACAATATTAACACGATTT   |      |      |      |      |      |      |      |      |      |
|                                          | (1)    | -----                                                                                              |      |      |      |      |      |      |      |      |      |
|                                          |        | Section 11                                                                                         |      |      |      |      |      |      |      |      |      |
| T4 NC 000866.4<br>SARS-CoV-2 NC_045512.2 | (961)  | 961                                                                                                | 968  | 979  | 990  | 1001 | 1012 | 1023 | 1034 | 1045 | 1056 |
|                                          | (961)  | TTAATATTATCAATAACGATATTAATTTTTGTTGTATTAATACCAAACAGACGATAACTTGATGCAACGGCTGAAGTTTCATGACTTTGCTTAATG   |      |      |      |      |      |      |      |      |      |
|                                          | (1)    | -----                                                                                              |      |      |      |      |      |      |      |      |      |
|                                          |        | Section 12                                                                                         |      |      |      |      |      |      |      |      |      |
| T4 NC 000866.4<br>SARS-CoV-2 NC_045512.2 | (1057) | 1057                                                                                               | 1067 | 1078 | 1089 | 1100 | 1111 | 1122 | 1133 | 1152 |      |
|                                          | (1057) | CGCTTCAGTCGAGGGTCAAGATTTACTTCATACACAACCTCCCGCGTTGCATAACTTACTGTCAGGTTCAAACATGCTCTGCATCTTTTTATATGAC  |      |      |      |      |      |      |      |      |      |
|                                          | (1)    | -----                                                                                              |      |      |      |      |      |      |      |      |      |
|                                          |        | Section 13                                                                                         |      |      |      |      |      |      |      |      |      |
| T4 NC 000866.4<br>SARS-CoV-2 NC_045512.2 | (1153) | 1153                                                                                               | 1166 | 1177 | 1188 | 1199 | 1210 | 1221 | 1232 | 1248 |      |
|                                          | (1153) | AGATTTTTAGTCGTGAATTTGACTGAATTACTAATCATATAATCTCGAGCAGAATACCCCATCTTCATCAATTCACGATATGTGTGACGAGGAGAT   |      |      |      |      |      |      |      |      |      |
|                                          | (1)    | -----                                                                                              |      |      |      |      |      |      |      |      |      |
|                                          |        | Section 14                                                                                         |      |      |      |      |      |      |      |      |      |
| T4 NC 000866.4<br>SARS-CoV-2 NC_045512.2 | (1249) | 1249                                                                                               | 1254 | 1265 | 1276 | 1287 | 1298 | 1309 | 1320 | 1331 | 1344 |
|                                          | (1249) | GTAGATTCTTTAAATCGTTTTACATCTTCATTAAATGCTTTCTCACTGAGTTCTTTAACTCGTTCAATAATATTTTTACGAGTGCGATCATCCAGT   |      |      |      |      |      |      |      |      |      |
|                                          | (1)    | -----                                                                                              |      |      |      |      |      |      |      |      |      |

## SARS-CoV-2 &amp; T4.apr

|                                          |        |                                                                                                    |      |      |      |      |      |      |      |      |      |
|------------------------------------------|--------|----------------------------------------------------------------------------------------------------|------|------|------|------|------|------|------|------|------|
|                                          |        | Section 15                                                                                         |      |      |      |      |      |      |      |      |      |
| T4 NC 000866.4<br>SARS-CoV-2 NC_045512.2 | (1345) | 1345                                                                                               | 1353 | 1364 | 1375 | 1386 | 1397 | 1408 | 1419 | 1440 |      |
|                                          | (1345) | GAAAGAGCCTCGCGAGATGGAGCAATATCAAGTGAACCCATTGGAAACTTAATGTAATTCACCTTCATTGCGAATGCTTAGCCAGTTACGGTCTCTA  |      |      |      |      |      |      |      |      |      |
|                                          | (1)    | -----                                                                                              |      |      |      |      |      |      |      |      |      |
|                                          |        | Section 16                                                                                         |      |      |      |      |      |      |      |      |      |
| T4 NC 000866.4<br>SARS-CoV-2 NC_045512.2 | (1441) | 1441                                                                                               | 1452 | 1463 | 1474 | 1485 | 1496 | 1507 | 1518 | 1536 |      |
|                                          | (1441) | ATAACACCATCGATAGGATAAACAATACCACCGTAGATAGCATATAATCCACCACGATCAGGCCAGTATCTTTCTGGATTTACACCGTAATAGTCA   |      |      |      |      |      |      |      |      |      |
|                                          | (1)    | -----                                                                                              |      |      |      |      |      |      |      |      |      |
|                                          |        | Section 17                                                                                         |      |      |      |      |      |      |      |      |      |
| T4 NC 000866.4<br>SARS-CoV-2 NC_045512.2 | (1537) | 1537                                                                                               | 1551 | 1562 | 1573 | 1584 | 1595 | 1606 | 1617 | 1632 |      |
|                                          | (1537) | TCAAAATCCGGAAAAATAATCAATTTTCGCGGTCAAGACCATTAAATGATAGCCAAATCTTTGAACGGTCGCATGATATAAGAACTTCATAAGCAAAG |      |      |      |      |      |      |      |      |      |
|                                          | (1)    | -----                                                                                              |      |      |      |      |      |      |      |      |      |
|                                          |        | Section 18                                                                                         |      |      |      |      |      |      |      |      |      |
| T4 NC 000866.4<br>SARS-CoV-2 NC_045512.2 | (1633) | 1633                                                                                               | 1639 | 1650 | 1661 | 1672 | 1683 | 1694 | 1705 | 1716 | 1728 |
|                                          | (1633) | TTTCTAAAGTCTTTTTCTTCAACTGGAACACTACGATTTCAATACCAGTTTTATCATCTGGACCCATTTCTTTTACGAATGTAGGTTTAATCTGTGGA |      |      |      |      |      |      |      |      |      |
|                                          | (1)    | -----                                                                                              |      |      |      |      |      |      |      |      |      |
|                                          |        | Section 19                                                                                         |      |      |      |      |      |      |      |      |      |
| T4 NC 000866.4<br>SARS-CoV-2 NC_045512.2 | (1729) | 1729                                                                                               | 1738 | 1749 | 1760 | 1771 | 1782 | 1793 | 1804 | 1824 |      |
|                                          | (1729) | CCATCACCATCCATGTAAGCTACATAACCACGAATTTACCTTTATGATACGAAGTAATACTAAACGTATCAGTATAACTAAACGGAGATTTAGAA    |      |      |      |      |      |      |      |      |      |
|                                          | (1)    | -----                                                                                              |      |      |      |      |      |      |      |      |      |
|                                          |        | Section 20                                                                                         |      |      |      |      |      |      |      |      |      |
| T4 NC 000866.4<br>SARS-CoV-2 NC_045512.2 | (1825) | 1825                                                                                               | 1837 | 1848 | 1859 | 1870 | 1881 | 1892 | 1903 | 1920 |      |
|                                          | (1825) | CCTAAACCAAATCCGCCAATAAAGTCATTAGATTCAGCTTTAGATGAACTGAAGTATGAATTATACAACCCAGGAGAATTATCATCACCTTGAATA   |      |      |      |      |      |      |      |      |      |
|                                          | (1)    | -----                                                                                              |      |      |      |      |      |      |      |      |      |
|                                          |        | Section 21                                                                                         |      |      |      |      |      |      |      |      |      |
| T4 NC 000866.4<br>SARS-CoV-2 NC_045512.2 | (1921) | 1921                                                                                               | 1936 | 1947 | 1958 | 1969 | 1980 | 1991 | 2002 | 2016 |      |
|                                          | (1921) | TCAAAATCACTCATACCCGGACCAAAATCTCGACAAACAAATCGTGGGTCTAAACGTCCAGGAAGTTGTATGATAAATTTTTCAGGATTTCCATTA   |      |      |      |      |      |      |      |      |      |
|                                          | (1)    | -----                                                                                              |      |      |      |      |      |      |      |      |      |

## SARS-CoV-2 &amp; T4.apr

|                                          |        |                                                                                                   |                      |                      |                      |                      |                      |                      |                      |                      |                      |
|------------------------------------------|--------|---------------------------------------------------------------------------------------------------|----------------------|----------------------|----------------------|----------------------|----------------------|----------------------|----------------------|----------------------|----------------------|
|                                          |        |                                                                                                   |                      |                      |                      |                      |                      |                      |                      |                      | Section 22           |
| T4 NC_000866.4<br>SARS-CoV-2 NC_045512.2 | (2017) | <a href="#">2017</a>                                                                              | <a href="#">2024</a> | <a href="#">2035</a> | <a href="#">2046</a> | <a href="#">2057</a> | <a href="#">2068</a> | <a href="#">2079</a> | <a href="#">2090</a> | <a href="#">2101</a> | <a href="#">2112</a> |
|                                          | (2017) | AGTGCATGAGCATCAATCATGTTAGTAATCAATTCACGGACTACTGCGCGAATCTTGTTTGTATACAAATCAGATGACAGAATTTTAAATACTTTA  |                      |                      |                      |                      |                      |                      |                      |                      |                      |
|                                          | (1)    | -----                                                                                             |                      |                      |                      |                      |                      |                      |                      |                      |                      |
|                                          |        |                                                                                                   |                      |                      |                      |                      |                      |                      |                      |                      | Section 23           |
| T4 NC_000866.4<br>SARS-CoV-2 NC_045512.2 | (2113) | <a href="#">2113</a>                                                                              | <a href="#">2123</a> | <a href="#">2134</a> | <a href="#">2145</a> | <a href="#">2156</a> | <a href="#">2167</a> | <a href="#">2178</a> | <a href="#">2189</a> | <a href="#">2208</a> |                      |
|                                          | (2113) | GGAGATGCTGTGATGCTAAATGCTTTTGATTAGAACCAATTACCAAGAATTGTTTCTTTTTCAGTGGTGATAATCATAATTTCTCATTAAATTCAT  |                      |                      |                      |                      |                      |                      |                      |                      |                      |
|                                          | (1)    | -----                                                                                             |                      |                      |                      |                      |                      |                      |                      |                      |                      |
|                                          |        |                                                                                                   |                      |                      |                      |                      |                      |                      |                      |                      | Section 24           |
| T4 NC_000866.4<br>SARS-CoV-2 NC_045512.2 | (2209) | <a href="#">2209</a>                                                                              | <a href="#">2222</a> | <a href="#">2233</a> | <a href="#">2244</a> | <a href="#">2255</a> | <a href="#">2266</a> | <a href="#">2277</a> | <a href="#">2288</a> | <a href="#">2304</a> |                      |
|                                          | (2209) | ATTACGCTTAATAACTTCAGCAACTTCTAGTAGTTTCATCTTTAGTTGCGGTGTCGGATTGAATTTTATCTCTAATATCTTTAAAGCGGGTTTTAAA |                      |                      |                      |                      |                      |                      |                      |                      |                      |
|                                          | (1)    | -----                                                                                             |                      |                      |                      |                      |                      |                      |                      |                      |                      |
|                                          |        |                                                                                                   |                      |                      |                      |                      |                      |                      |                      |                      | Section 25           |
| T4 NC_000866.4<br>SARS-CoV-2 NC_045512.2 | (2305) | <a href="#">2305</a>                                                                              | <a href="#">2310</a> | <a href="#">2321</a> | <a href="#">2332</a> | <a href="#">2343</a> | <a href="#">2354</a> | <a href="#">2365</a> | <a href="#">2376</a> | <a href="#">2387</a> | <a href="#">2400</a> |
|                                          | (2305) | TTCTTCGGCTTCTCCCATATCGAAAAAGCGTTGAATGATTCTATATTCTCGATGAACTGCTTTATCAAAAAGTTCTAAATTTACTTTATATGATTT  |                      |                      |                      |                      |                      |                      |                      |                      |                      |
|                                          | (1)    | -----                                                                                             |                      |                      |                      |                      |                      |                      |                      |                      |                      |
|                                          |        |                                                                                                   |                      |                      |                      |                      |                      |                      |                      |                      | Section 26           |
| T4 NC_000866.4<br>SARS-CoV-2 NC_045512.2 | (2401) | <a href="#">2401</a>                                                                              | <a href="#">2409</a> | <a href="#">2420</a> | <a href="#">2431</a> | <a href="#">2442</a> | <a href="#">2453</a> | <a href="#">2464</a> | <a href="#">2475</a> | <a href="#">2496</a> |                      |
|                                          | (2401) | CATTTCAATATCCTCATTTGCCCAATTAATTATACCACATCCTTGTTGGTAAAGTAACTACTGGCTCATCCATTCTTTACGAAGGTCAGCATTATC  |                      |                      |                      |                      |                      |                      |                      |                      |                      |
|                                          | (1)    | -----                                                                                             |                      |                      |                      |                      |                      |                      |                      |                      |                      |
|                                          |        |                                                                                                   |                      |                      |                      |                      |                      |                      |                      |                      | Section 27           |
| T4 NC_000866.4<br>SARS-CoV-2 NC_045512.2 | (2497) | <a href="#">2497</a>                                                                              | <a href="#">2508</a> | <a href="#">2519</a> | <a href="#">2530</a> | <a href="#">2541</a> | <a href="#">2552</a> | <a href="#">2563</a> | <a href="#">2574</a> | <a href="#">2592</a> |                      |
|                                          | (2497) | TCCCATGAGCATTTCAAAAAGCTCTTTCAGTTCTCAGGAAGTTTAAACAACATCATATACTGGGTTTTGAATCATCTCACGATATTCAGATTTTTTC |                      |                      |                      |                      |                      |                      |                      |                      |                      |
|                                          | (1)    | -----                                                                                             |                      |                      |                      |                      |                      |                      |                      |                      |                      |
|                                          |        |                                                                                                   |                      |                      |                      |                      |                      |                      |                      |                      | Section 28           |
| T4 NC_000866.4<br>SARS-CoV-2 NC_045512.2 | (2593) | <a href="#">2593</a>                                                                              | <a href="#">2607</a> | <a href="#">2618</a> | <a href="#">2629</a> | <a href="#">2640</a> | <a href="#">2651</a> | <a href="#">2662</a> | <a href="#">2673</a> | <a href="#">2688</a> |                      |
|                                          | (2593) | CAAAGAGCCAAGTCCCTTAATATAACGGATGCTATGTTTAGGTAGAGCATCTTTGGCACTCTCATATTCAGCGACTGTATAAAACCATTCTTGTTT  |                      |                      |                      |                      |                      |                      |                      |                      |                      |
|                                          | (1)    | -----                                                                                             |                      |                      |                      |                      |                      |                      |                      |                      |                      |

## SARS-CoV-2 &amp; T4.apr

|                                          |        |                                                                                                     |      |      |      |      |      |      |      |      |      |
|------------------------------------------|--------|-----------------------------------------------------------------------------------------------------|------|------|------|------|------|------|------|------|------|
|                                          |        | Section 29                                                                                          |      |      |      |      |      |      |      |      |      |
| T4 NC_000866.4<br>SARS-CoV-2 NC_045512.2 | (2689) | 2689                                                                                                | 2695 | 2706 | 2717 | 2728 | 2739 | 2750 | 2761 | 2772 | 2784 |
|                                          | (2689) | TTTACCGACCTGAGCGATGATTACAGGAGTTTTGACAAAGCGAATTCGTCCTTGCTCAAACAATTCTGGCCAATTACTAAAAAATCCGAGCAGAGA    |      |      |      |      |      |      |      |      |      |
|                                          | (1)    | -----                                                                                               |      |      |      |      |      |      |      |      |      |
|                                          |        | Section 30                                                                                          |      |      |      |      |      |      |      |      |      |
| T4 NC_000866.4<br>SARS-CoV-2 NC_045512.2 | (2785) | 2785                                                                                                | 2794 | 2805 | 2816 | 2827 | 2838 | 2849 | 2860 |      | 2880 |
|                                          | (2785) | AGGATAAATAGAACCTAATCCAATAATCTCTTAATTATGAGGTATTTCTATAGATAGCCCAGGCTATCCATCGTGATCTGCGTCTGTCATAATA      |      |      |      |      |      |      |      |      |      |
|                                          | (1)    | -----                                                                                               |      |      |      |      |      |      |      |      |      |
|                                          |        | Section 31                                                                                          |      |      |      |      |      |      |      |      |      |
| T4 NC_000866.4<br>SARS-CoV-2 NC_045512.2 | (2881) | 2881                                                                                                | 2893 | 2904 | 2915 | 2926 | 2937 | 2948 | 2959 |      | 2976 |
|                                          | (2881) | GCGACATTTCGCATAGTTTCATTGAAGAGGATTTAATAGAACGACGAACATTGTTCTGCAATTTATATTTTTTCATATCAACGCTAGAAGAATCAATT  |      |      |      |      |      |      |      |      |      |
|                                          | (1)    | -----                                                                                               |      |      |      |      |      |      |      |      |      |
|                                          |        | Section 32                                                                                          |      |      |      |      |      |      |      |      |      |
| T4 NC_000866.4<br>SARS-CoV-2 NC_045512.2 | (2977) | 2977                                                                                                | 2992 | 3003 | 3014 | 3025 | 3036 | 3047 | 3058 |      | 3072 |
|                                          | (2977) | TTTACAAATTTTCATTATACACCTCATAGAACTTTTCATCAGGAATCCAACCGCGTTTAAATTCATTAAATGCTCGGCCGAATAATTTTGAATTCAC   |      |      |      |      |      |      |      |      |      |
|                                          | (1)    | -----                                                                                               |      |      |      |      |      |      |      |      |      |
|                                          |        | Section 33                                                                                          |      |      |      |      |      |      |      |      |      |
| T4 NC_000866.4<br>SARS-CoV-2 NC_045512.2 | (3073) | 3073                                                                                                | 3080 | 3091 | 3102 | 3113 | 3124 | 3135 | 3146 | 3157 | 3168 |
|                                          | (3073) | AGTTATATTATTAACTGATTTCCATTTAGCAACTCCCGTTTCGTTTATAATGATCGGGGTCATATTTTCGTGACGTACCATTTCATATAAATTTGGTAT |      |      |      |      |      |      |      |      |      |
|                                          | (1)    | -----                                                                                               |      |      |      |      |      |      |      |      |      |
|                                          |        | Section 34                                                                                          |      |      |      |      |      |      |      |      |      |
| T4 NC_000866.4<br>SARS-CoV-2 NC_045512.2 | (3169) | 3169                                                                                                | 3179 | 3190 | 3201 | 3212 | 3223 | 3234 | 3245 |      | 3264 |
|                                          | (3169) | TAATTTTACAGCCTCTGGATTTGTCGCTGATTTATTATACCATGGTTTCGCTTTTTCAAGTTCAGCTGCTTTTGCAGTAGCAGCAACAGTATTTCC    |      |      |      |      |      |      |      |      |      |
|                                          | (1)    | -----                                                                                               |      |      |      |      |      |      |      |      |      |
|                                          |        | Section 35                                                                                          |      |      |      |      |      |      |      |      |      |
| T4 NC_000866.4<br>SARS-CoV-2 NC_045512.2 | (3265) | 3265                                                                                                | 3278 | 3289 | 3300 | 3311 | 3322 | 3333 | 3344 |      | 3360 |
|                                          | (3265) | AACACCAACTAATTTTTTCAGTTTTAATGCGTGGATCATTAACATGAAGACGAAAAACTTCGCCCTTTTCATTTTTTAAAGCATGTCATGCCTTTAAT  |      |      |      |      |      |      |      |      |      |
|                                          | (1)    | -----                                                                                               |      |      |      |      |      |      |      |      |      |

## SARS-CoV-2 &amp; T4.apr

|                                          |        |                                                                                                    |      |      |      |      |      |      |      |      |      |
|------------------------------------------|--------|----------------------------------------------------------------------------------------------------|------|------|------|------|------|------|------|------|------|
|                                          |        | Section 36                                                                                         |      |      |      |      |      |      |      |      |      |
| T4 NC 000866.4<br>SARS-CoV-2 NC_045512.2 | (3361) | 3361                                                                                               | 3366 | 3377 | 3388 | 3399 | 3410 | 3421 | 3432 | 3443 | 3456 |
|                                          | (3361) | TCCAGGAAGCTTAACACCTTTATTAACACCGCATCATTCCTTTGGGTTAAATGATCCTTTAATTAATAAGGCGCATTTACCCGATTTAACTACTTC   |      |      |      |      |      |      |      |      |      |
|                                          | (1)    | -----                                                                                              |      |      |      |      |      |      |      |      |      |
|                                          |        | Section 37                                                                                         |      |      |      |      |      |      |      |      |      |
| T4 NC 000866.4<br>SARS-CoV-2 NC_045512.2 | (3457) | 3457                                                                                               | 3465 | 3476 | 3487 | 3498 | 3509 | 3520 | 3531 |      | 3552 |
|                                          | (3457) | TCATTCAACAACCTTTATCTTTCATAACGTTTTTTGACCATTTCAGATACTGCTCTTTGATGGCTAAATTCTAGCAATTTCACTATAATTTGCACTAG |      |      |      |      |      |      |      |      |      |
|                                          | (1)    | -----                                                                                              |      |      |      |      |      |      |      |      |      |
|                                          |        | Section 38                                                                                         |      |      |      |      |      |      |      |      |      |
| T4 NC 000866.4<br>SARS-CoV-2 NC_045512.2 | (3553) | 3553                                                                                               | 3564 | 3575 | 3586 | 3597 | 3608 | 3619 | 3630 |      | 3648 |
|                                          | (3553) | AACGTAAACTATTTTTTCAGTGTTTCAACATTCTATTTCATCGCATATGCCATTTACGATTACGATGAATTTTATATAGTAGAAAAATAGTGCTAAAA |      |      |      |      |      |      |      |      |      |
|                                          | (1)    | -----                                                                                              |      |      |      |      |      |      |      |      |      |
|                                          |        | Section 39                                                                                         |      |      |      |      |      |      |      |      |      |
| T4 NC 000866.4<br>SARS-CoV-2 NC_045512.2 | (3649) | 3649                                                                                               | 3663 | 3674 | 3685 | 3696 | 3707 | 3718 | 3729 |      | 3744 |
|                                          | (3649) | AGTGTTTCACGAAAAAGTCATGTTTCACCAAATTTTCGTTATCATCAGAACCTCCCATTGATCTTGGAAGGATATGATGAATTTACCCCTTAAATTTA |      |      |      |      |      |      |      |      |      |
|                                          | (1)    | -----                                                                                              |      |      |      |      |      |      |      |      |      |
|                                          |        | Section 40                                                                                         |      |      |      |      |      |      |      |      |      |
| T4 NC 000866.4<br>SARS-CoV-2 NC_045512.2 | (3745) | 3745                                                                                               | 3751 | 3762 | 3773 | 3784 | 3795 | 3806 | 3817 | 3828 | 3840 |
|                                          | (3745) | GAAACGCGGGTTTTACCCCGCACTATTAAGTCATTATAGATTTTTTCGTAATTCACCTACTGTTATCCATTTACCATTAATCTGTACTTCATCATT   |      |      |      |      |      |      |      |      |      |
|                                          | (1)    | -----                                                                                              |      |      |      |      |      |      |      |      |      |
|                                          |        | Section 41                                                                                         |      |      |      |      |      |      |      |      |      |
| T4 NC 000866.4<br>SARS-CoV-2 NC_045512.2 | (3841) | 3841                                                                                               | 3850 | 3861 | 3872 | 3883 | 3894 | 3905 | 3916 |      | 3936 |
|                                          | (3841) | TTCATTTACGATAATTGTATCGCCATTTAGCTCGAAAGTAAACCACTCGCCATCTTCTTTTTCTTCAAACGCTTTTTTACCGAGAAGTAGACCAGT   |      |      |      |      |      |      |      |      |      |
|                                          | (1)    | -----                                                                                              |      |      |      |      |      |      |      |      |      |
|                                          |        | Section 42                                                                                         |      |      |      |      |      |      |      |      |      |
| T4 NC 000866.4<br>SARS-CoV-2 NC_045512.2 | (3937) | 3937                                                                                               | 3949 | 3960 | 3971 | 3982 | 3993 | 4004 | 4015 |      | 4032 |
|                                          | (3937) | GATTGCGCAAATATCAAATAGTTCTTTGTTTTAAGCATATCTGCATAAGACATACCCCAACTGTTGAGAACTTTACCACGCAATGGATAACCACC    |      |      |      |      |      |      |      |      |      |
|                                          | (1)    | -----                                                                                              |      |      |      |      |      |      |      |      |      |

## SARS-CoV-2 &amp; T4.apr

|                                          |        |                                                                                                   |      |      |      |      |      |      |      |      |      |
|------------------------------------------|--------|---------------------------------------------------------------------------------------------------|------|------|------|------|------|------|------|------|------|
|                                          |        | Section 43                                                                                        |      |      |      |      |      |      |      |      |      |
| T4 NC 000866.4<br>SARS-CoV-2 NC_045512.2 | (4033) | 4033                                                                                              | 4048 | 4059 | 4070 | 4081 | 4092 | 4103 | 4114 | 4128 |      |
|                                          | (4033) | GTGAAGTTCTTTATCACGAACATCAATAAGATATCCGATAGCCGAATCACCCCTCAGTCAAGAAAAGAGTAGTATCAGCATCTTTACCGCAAAGATT |      |      |      |      |      |      |      |      |      |
|                                          | (1)    | -----                                                                                             |      |      |      |      |      |      |      |      |      |
|                                          |        | Section 44                                                                                        |      |      |      |      |      |      |      |      |      |
| T4 NC 000866.4<br>SARS-CoV-2 NC_045512.2 | (4129) | 4129                                                                                              | 4136 | 4147 | 4158 | 4169 | 4180 | 4191 | 4202 | 4213 | 4224 |
|                                          | (4129) | CGCTTTGATATGTTTATGAACCTTAGCTTTAGAAGCCTTTTTAGCTGCTTTAGTTTCTGCTGCTTTTTCTGCCGCCAATTTACGAGCCAAAGCAGC  |      |      |      |      |      |      |      |      |      |
|                                          | (1)    | -----                                                                                             |      |      |      |      |      |      |      |      |      |
|                                          |        | Section 45                                                                                        |      |      |      |      |      |      |      |      |      |
| T4 NC 000866.4<br>SARS-CoV-2 NC_045512.2 | (4225) | 4225                                                                                              | 4235 | 4246 | 4257 | 4268 | 4279 | 4290 | 4301 | 4320 |      |
|                                          | (4225) | TTCAATAATCGGCATTAGAATTGCTTCATTATTTAGAATATCACGTGAAATCTTTTTAGCATCAAGTTGAATATGACTACGAATTTGCCAAATGG   |      |      |      |      |      |      |      |      |      |
|                                          | (1)    | -----                                                                                             |      |      |      |      |      |      |      |      |      |
|                                          |        | Section 46                                                                                        |      |      |      |      |      |      |      |      |      |
| T4 NC 000866.4<br>SARS-CoV-2 NC_045512.2 | (4321) | 4321                                                                                              | 4334 | 4345 | 4356 | 4367 | 4378 | 4389 | 4400 | 4416 |      |
|                                          | (4321) | AGAAGTCAAACGCTCTTTAGTTTGACGAATCAATCGCATGTTTTTCATATCACGAACAAACATAACGATAGTCAAACATTCTTTGACACGTGCTTT  |      |      |      |      |      |      |      |      |      |
|                                          | (1)    | -----                                                                                             |      |      |      |      |      |      |      |      |      |
|                                          |        | Section 47                                                                                        |      |      |      |      |      |      |      |      |      |
| T4 NC 000866.4<br>SARS-CoV-2 NC_045512.2 | (4417) | 4417                                                                                              | 4422 | 4433 | 4444 | 4455 | 4466 | 4477 | 4488 | 4499 | 4512 |
|                                          | (4417) | AGTCACATCAATTTTGAACCTTACGTTTGATTTGTGGAATAAGGTCTTCACAAATATCATCCATAGCGCAGTCAATGTGATGGCCACCATTCTTAGT |      |      |      |      |      |      |      |      |      |
|                                          | (1)    | -----                                                                                             |      |      |      |      |      |      |      |      |      |
|                                          |        | Section 48                                                                                        |      |      |      |      |      |      |      |      |      |
| T4 NC 000866.4<br>SARS-CoV-2 NC_045512.2 | (4513) | 4513                                                                                              | 4521 | 4532 | 4543 | 4554 | 4565 | 4576 | 4587 | 4608 |      |
|                                          | (4513) | ATGAATGTTATTGACGTATGTTAATTGACGAAAACCATCCGGTGAACGACCAACCGCAATAGAACAATTTCTTGCTCTTGAACAATAGCATGTTT   |      |      |      |      |      |      |      |      |      |
|                                          | (1)    | -----                                                                                             |      |      |      |      |      |      |      |      |      |
|                                          |        | Section 49                                                                                        |      |      |      |      |      |      |      |      |      |
| T4 NC 000866.4<br>SARS-CoV-2 NC_045512.2 | (4609) | 4609                                                                                              | 4620 | 4631 | 4642 | 4653 | 4664 | 4675 | 4686 | 4704 |      |
|                                          | (4609) | ATCATACTGCCGTGCATATTTCTTAAAAATTGCCCTGAACCTTTTTACCATTAAAGGTAAATTGAATATCAGGATAAACTACAGCAAGTGTCTGGAG |      |      |      |      |      |      |      |      |      |
|                                          | (1)    | -----                                                                                             |      |      |      |      |      |      |      |      |      |

## SARS-CoV-2 &amp; T4.apr

|                                          |        |                                                                                                     |      |      |      |      |      |      |      |      |      |
|------------------------------------------|--------|-----------------------------------------------------------------------------------------------------|------|------|------|------|------|------|------|------|------|
|                                          |        | Section 50                                                                                          |      |      |      |      |      |      |      |      |      |
| T4 NC_000866.4<br>SARS-CoV-2 NC_045512.2 | (4705) | 4705                                                                                                | 4719 | 4730 | 4741 | 4752 | 4763 | 4774 | 4785 | 4800 |      |
|                                          | (4705) | ACGATCCAGTGTAATGTCAAGATAAACTTGGGACAGCTCATTAGTTTCAAATGACATAAAATCAGGAATGAAAGTAACACGAGTTCCTTTCCATTT    |      |      |      |      |      |      |      |      |      |
|                                          | (1)    | -----                                                                                               |      |      |      |      |      |      |      |      |      |
|                                          |        | Section 51                                                                                          |      |      |      |      |      |      |      |      |      |
| T4 NC_000866.4<br>SARS-CoV-2 NC_045512.2 | (4801) | 4801                                                                                                | 4807 | 4818 | 4829 | 4840 | 4851 | 4862 | 4873 | 4884 | 4896 |
|                                          | (4801) | TCCAGGAATATCTTCCCATGATTTATTTTCCATGCCATTTGAACAACGAACTACAATATTATTTTGACCGTCGCCAGTTTCACCGACAAACATCAC    |      |      |      |      |      |      |      |      |      |
|                                          | (1)    | -----                                                                                               |      |      |      |      |      |      |      |      |      |
|                                          |        | Section 52                                                                                          |      |      |      |      |      |      |      |      |      |
| T4 NC_000866.4<br>SARS-CoV-2 NC_045512.2 | (4897) | 4897                                                                                                | 4906 | 4917 | 4928 | 4939 | 4950 | 4961 | 4972 | 4992 |      |
|                                          | (4897) | AGAAAAAATGTTTGTCAAACCTAGAACCAACACCGTTTCATACCGCCGGTGACGCGTTCTTTATCATCACCAAAGTTACCACCTGCTTTTGGAAATAGT |      |      |      |      |      |      |      |      |      |
|                                          | (1)    | -----                                                                                               |      |      |      |      |      |      |      |      |      |
|                                          |        | Section 53                                                                                          |      |      |      |      |      |      |      |      |      |
| T4 NC_000866.4<br>SARS-CoV-2 NC_045512.2 | (4993) | 4993                                                                                                | 5005 | 5016 | 5027 | 5038 | 5049 | 5060 | 5071 | 5088 |      |
|                                          | (4993) | CCATGCGGCAACAGGACCAGGAATTTCTTCACCGGTAGGTGTTTTAACCATCGCTTGTTGGAATACCGCGACCGTTATCTTCAACTGTTACTTGATT   |      |      |      |      |      |      |      |      |      |
|                                          | (1)    | -----                                                                                               |      |      |      |      |      |      |      |      |      |
|                                          |        | Section 54                                                                                          |      |      |      |      |      |      |      |      |      |
| T4 NC_000866.4<br>SARS-CoV-2 NC_045512.2 | (5089) | 5089                                                                                                | 5104 | 5115 | 5126 | 5137 | 5148 | 5159 | 5170 | 5184 |      |
|                                          | (5089) | GTTTTTAATAGTAACATTAATTTTATTCGCGAATTTAACTTAGTACGAATACCTTCATCTACTGAGTTATCGATAATTTTCATCAATAAGCTTAAC    |      |      |      |      |      |      |      |      |      |
|                                          | (1)    | -----                                                                                               |      |      |      |      |      |      |      |      |      |
|                                          |        | Section 55                                                                                          |      |      |      |      |      |      |      |      |      |
| T4 NC_000866.4<br>SARS-CoV-2 NC_045512.2 | (5185) | 5185                                                                                                | 5192 | 5203 | 5214 | 5225 | 5236 | 5247 | 5258 | 5269 | 5280 |
|                                          | (5185) | AAGACCAGGTACATACTGAACACTTTCCCATTTACCAAACATAAAGCGCTCATGCGTTTCATTAGCAGAAGAGCCAATGTACATGCCACTACGCTT    |      |      |      |      |      |      |      |      |      |
|                                          | (1)    | -----                                                                                               |      |      |      |      |      |      |      |      |      |
|                                          |        | Section 56                                                                                          |      |      |      |      |      |      |      |      |      |
| T4 NC_000866.4<br>SARS-CoV-2 NC_045512.2 | (5281) | 5281                                                                                                | 5291 | 5302 | 5313 | 5324 | 5335 | 5346 | 5357 | 5376 |      |
|                                          | (5281) | TTTGATATGTTCAATATCGCTCAGAAATTTTAATTTTCATTCTTAATCATCACTTATCCTCGTTTGTTTCGGGAATATTATACTCCGGTAATCATAA   |      |      |      |      |      |      |      |      |      |
|                                          | (1)    | -----                                                                                               |      |      |      |      |      |      |      |      |      |



## SARS-CoV-2 &amp; T4.apr

|                                          |        |                                                                                                    |      |      |      |      |      |      |      |      |      |
|------------------------------------------|--------|----------------------------------------------------------------------------------------------------|------|------|------|------|------|------|------|------|------|
|                                          |        | Section 57                                                                                         |      |      |      |      |      |      |      |      |      |
| T4 NC_000866.4<br>SARS-CoV-2 NC_045512.2 | (5377) | 5377                                                                                               | 5390 | 5401 | 5412 | 5423 | 5434 | 5445 | 5456 | 5472 |      |
|                                          | (5377) | AGCTAAAGGCCCGAAGGCCTTTTATTTAAAACGAATAGTTGAATCCTTAAAGAACAGCCCAGAACATACTGTTTCCTTCTACTTTCTGCCCCGGTAGG |      |      |      |      |      |      |      |      |      |
|                                          |        | Section 58                                                                                         |      |      |      |      |      |      |      |      |      |
| T4 NC_000866.4<br>SARS-CoV-2 NC_045512.2 | (5473) | 5473                                                                                               | 5478 | 5489 | 5500 | 5511 | 5522 | 5533 | 5544 | 5555 | 5568 |
|                                          | (5473) | TCCAATAGCACGAAATCCAGTATGCTGGAAATCATTTTCAGAGCAACCGAACCAATTATATCCAGTGATTTCAATATTAGTAAAACCACTTGAAGA   |      |      |      |      |      |      |      |      |      |
|                                          |        | Section 59                                                                                         |      |      |      |      |      |      |      |      |      |
| T4 NC_000866.4<br>SARS-CoV-2 NC_045512.2 | (5569) | 5569                                                                                               | 5577 | 5588 | 5599 | 5610 | 5621 | 5632 | 5643 | 5664 |      |
|                                          | (5569) | CAAAACTTTGGTTGCATTAATCAGCATCAGTACTATTAATTAAAGACACTGCTAATACTAATGCTGCAATTGAACGACTAATATATTTTCATAACTA  |      |      |      |      |      |      |      |      |      |
|                                          |        | Section 60                                                                                         |      |      |      |      |      |      |      |      |      |
| T4 NC_000866.4<br>SARS-CoV-2 NC_045512.2 | (5665) | 5665                                                                                               | 5676 | 5687 | 5698 | 5709 | 5720 | 5731 | 5742 | 5760 |      |
|                                          | (5665) | CCCTTTAAGCAAGTCGTAAAATCCATTATTCCCATGCTTAGGAAGCGGAAACTAACCGAACAGCCAGCCGATGACAATCAGGACATACACCAGTAT   |      |      |      |      |      |      |      |      |      |
|                                          |        | Section 61                                                                                         |      |      |      |      |      |      |      |      |      |
| T4 NC_000866.4<br>SARS-CoV-2 NC_045512.2 | (5761) | 5761                                                                                               | 5775 | 5786 | 5797 | 5808 | 5819 | 5830 | 5841 | 5856 |      |
|                                          | (5761) | CTCTTCAGAAATTTTCTTGATTTTTTCGTATTCTTTTGCACAGTCTTTGGATTGACATTTATAATCATAAAGCGGCATAATTATTCTTTAAAGTA    |      |      |      |      |      |      |      |      |      |
|                                          |        | Section 62                                                                                         |      |      |      |      |      |      |      |      |      |
| T4 NC_000866.4<br>SARS-CoV-2 NC_045512.2 | (5857) | 5857                                                                                               | 5863 | 5874 | 5885 | 5896 | 5907 | 5918 | 5929 | 5940 | 5952 |
|                                          | (5857) | AGCTTTCAACATCTGATATAAAGACCACGCCTGATCATTATTTTCAATAGTAACTTTTCATGACTGGGAATTCTGTGAAATCTTCTATTTGTTCTTG  |      |      |      |      |      |      |      |      |      |
|                                          |        | Section 63                                                                                         |      |      |      |      |      |      |      |      |      |
| T4 NC_000866.4<br>SARS-CoV-2 NC_045512.2 | (5953) | 5953                                                                                               | 5962 | 5973 | 5984 | 5995 | 6006 | 6017 | 6028 | 6048 |      |
|                                          | (5953) | CTCTTTCTCTTCCTGCTCTTGCTCTTCAACCGCCTGATATGGATTTTCCACTTCATCAAAGAACCCAGCTTCGTTAGTAGAGAGCCAGATAAAGTT   |      |      |      |      |      |      |      |      |      |

## SARS-CoV-2 &amp; T4.apr

|                                          |        |                                                                                                     |      |      |      |      |      |      |      |      |      |
|------------------------------------------|--------|-----------------------------------------------------------------------------------------------------|------|------|------|------|------|------|------|------|------|
|                                          |        | Section 64                                                                                          |      |      |      |      |      |      |      |      |      |
| T4 NC 000866.4<br>SARS-CoV-2 NC_045512.2 | (6049) | 6049                                                                                                | 6061 | 6072 | 6083 | 6094 | 6105 | 6116 | 6127 | 6144 |      |
|                                          | (6049) | TTCGTCAAGGATATCACC GCCGGCACAACGTTTGAGTACACCTATGGATGTCATAATTTTAGTAGGACGCCCAAGATAATCAGCATCTAAAATTTT   |      |      |      |      |      |      |      |      |      |
|                                          | (1)    | -----                                                                                               |      |      |      |      |      |      |      |      |      |
|                                          |        | Section 65                                                                                          |      |      |      |      |      |      |      |      |      |
| T4 NC 000866.4<br>SARS-CoV-2 NC_045512.2 | (6145) | 6145                                                                                                | 6160 | 6171 | 6182 | 6193 | 6204 | 6215 | 6226 | 6240 |      |
|                                          | (6145) | AAAAGGCTCCATACCTAAACGTCGTGCATAGATTCCGTTATCAGTATGGTCTTTAATAAAATTTTCTTGAGCTTGTTTATTTTTAAATTGATACCA    |      |      |      |      |      |      |      |      |      |
|                                          | (1)    | -----                                                                                               |      |      |      |      |      |      |      |      |      |
|                                          |        | Section 66                                                                                          |      |      |      |      |      |      |      |      |      |
| T4 NC 000866.4<br>SARS-CoV-2 NC_045512.2 | (6241) | 6241                                                                                                | 6248 | 6259 | 6270 | 6281 | 6292 | 6303 | 6314 | 6325 | 6336 |
|                                          | (6241) | TTTATTAAC TTCAAATTTAATAGCCATTAATAAATTTCTTCCAGTAAGTTGTGCCGTCTTCAGTAATTTACGAAATACACCATAAATTGGCTGT     |      |      |      |      |      |      |      |      |      |
|                                          | (1)    | -----                                                                                               |      |      |      |      |      |      |      |      |      |
|                                          |        | Section 67                                                                                          |      |      |      |      |      |      |      |      |      |
| T4 NC 000866.4<br>SARS-CoV-2 NC_045512.2 | (6337) | 6337                                                                                                | 6347 | 6358 | 6369 | 6380 | 6391 | 6402 | 6413 | 6432 |      |
|                                          | (6337) | TTATCACCGACTTTCTCATACACATAAACAGAGTCAAGTGAGTAACTTGCTAGTATGTTTCTTTGAACTACTACCAAATTTGGATCAAATAAT       |      |      |      |      |      |      |      |      |      |
|                                          | (1)    | -----                                                                                               |      |      |      |      |      |      |      |      |      |
|                                          |        | Section 68                                                                                          |      |      |      |      |      |      |      |      |      |
| T4 NC 000866.4<br>SARS-CoV-2 NC_045512.2 | (6433) | 6433                                                                                                | 6446 | 6457 | 6468 | 6479 | 6490 | 6501 | 6512 | 6528 |      |
|                                          | (6433) | ACATCTTCAAATTCATCATTAGTGCAATTCTGAACAATTTTACGTTTCATTACAATTTCTTCATTAATTGAACAGTGGAGCGATACGTTTCAGAAG    |      |      |      |      |      |      |      |      |      |
|                                          | (1)    | -----                                                                                               |      |      |      |      |      |      |      |      |      |
|                                          |        | Section 69                                                                                          |      |      |      |      |      |      |      |      |      |
| T4 NC 000866.4<br>SARS-CoV-2 NC_045512.2 | (6529) | 6529                                                                                                | 6534 | 6545 | 6556 | 6567 | 6578 | 6589 | 6600 | 6611 | 6624 |
|                                          | (6529) | AGTATCAACACCTTTAGCGAATTTTCCATTTTATTCTCCAAGTTGTTTTCTGTATCAGTAGTTGATATTGATATAGTACCATAATCAACTACTGAT    |      |      |      |      |      |      |      |      |      |
|                                          | (1)    | -----                                                                                               |      |      |      |      |      |      |      |      |      |
|                                          |        | Section 70                                                                                          |      |      |      |      |      |      |      |      |      |
| T4 NC 000866.4<br>SARS-CoV-2 NC_045512.2 | (6625) | 6625                                                                                                | 6633 | 6644 | 6655 | 6666 | 6677 | 6688 | 6699 | 6720 |      |
|                                          | (6625) | GTATATAGTTTTATGAAAAATTTAAACTTTATGCATAGAGAGCATTGCTATAGTGTTTAAATCCAACCTTTCAGGAATGACTTTGTATGTTTCCTAAAA |      |      |      |      |      |      |      |      |      |
|                                          | (1)    | -----                                                                                               |      |      |      |      |      |      |      |      |      |

## SARS-CoV-2 &amp; T4.apr

|                                          |        |                                                                                                   |      |      |      |      |      |      |      |      |      |
|------------------------------------------|--------|---------------------------------------------------------------------------------------------------|------|------|------|------|------|------|------|------|------|
|                                          |        | Section 71                                                                                        |      |      |      |      |      |      |      |      |      |
| T4 NC 000866.4<br>SARS-CoV-2 NC_045512.2 | (6721) | 6721                                                                                              | 6732 | 6743 | 6754 | 6765 | 6776 | 6787 | 6798 | 6816 |      |
|                                          | (6721) | ATACCACGTTGTACAACCTTAACACCATCTTCTACCCATTGATCGGTAATGTATCCACACATAGCGCGAGTATAAACAACCCTTCCATCATCTTTAA |      |      |      |      |      |      |      |      |      |
|                                          | (1)    | -----                                                                                             |      |      |      |      |      |      |      |      |      |
|                                          |        | Section 72                                                                                        |      |      |      |      |      |      |      |      |      |
| T4 NC 000866.4<br>SARS-CoV-2 NC_045512.2 | (6817) | 6817                                                                                              | 6831 | 6842 | 6853 | 6864 | 6875 | 6886 | 6897 | 6912 |      |
|                                          | (6817) | TAAAGTTAAATTCACAAGGAGCAATGAACCTTGATAGCCTGACCGAGTTTCCACTTAAAGTCTACACCTACATGCGAAGTATCAATCGTTTCAATTC |      |      |      |      |      |      |      |      |      |
|                                          | (1)    | -----                                                                                             |      |      |      |      |      |      |      |      |      |
|                                          |        | Section 73                                                                                        |      |      |      |      |      |      |      |      |      |
| T4 NC 000866.4<br>SARS-CoV-2 NC_045512.2 | (6913) | 6913                                                                                              | 6919 | 6930 | 6941 | 6952 | 6963 | 6974 | 6985 | 6996 | 7008 |
|                                          | (6913) | CTTTAGCAGGAACAGCTTTTAAAAACGCAGACTCAAGAAATTTGCGACGAACATAGCCAAACTGGGGTTTAGACTTTCCATCTTTAGGAATGATAC  |      |      |      |      |      |      |      |      |      |
|                                          | (1)    | -----                                                                                             |      |      |      |      |      |      |      |      |      |
|                                          |        | Section 74                                                                                        |      |      |      |      |      |      |      |      |      |
| T4 NC 000866.4<br>SARS-CoV-2 NC_045512.2 | (7009) | 7009                                                                                              | 7018 | 7029 | 7040 | 7051 | 7062 | 7073 | 7084 | 7104 |      |
|                                          | (7009) | GCACTTTTACTTCAGAATCTTCATCTTTAACACCATGCTTAAGCTGAATGCTTACAACCTCGACCAATTTTCCTGCTGCTTTAGAACGGGATTTAT  |      |      |      |      |      |      |      |      |      |
|                                          | (1)    | -----                                                                                             |      |      |      |      |      |      |      |      |      |
|                                          |        | Section 75                                                                                        |      |      |      |      |      |      |      |      |      |
| T4 NC 000866.4<br>SARS-CoV-2 NC_045512.2 | (7105) | 7105                                                                                              | 7117 | 7128 | 7139 | 7150 | 7161 | 7172 | 7183 | 7200 |      |
|                                          | (7105) | CAGATACACGAGCTAATTCACCAATATTAATAATCATAGTTATCTCTCACTTGTTAAAAAGATTTTATACTCCACGGGACCATTATACTCTGGTCC  |      |      |      |      |      |      |      |      |      |
|                                          | (1)    | -----                                                                                             |      |      |      |      |      |      |      |      |      |
|                                          |        | Section 76                                                                                        |      |      |      |      |      |      |      |      |      |
| T4 NC 000866.4<br>SARS-CoV-2 NC_045512.2 | (7201) | 7201                                                                                              | 7216 | 7227 | 7238 | 7249 | 7260 | 7271 | 7282 | 7296 |      |
|                                          | (7201) | CAAGAGTTTGTAACCTATTAATTCAAAATAGCTACCACTGCACTACGAGGAACCTACGGAGTACTCTCCAGCATGAACTACGTTTCAAGTTCAACG  |      |      |      |      |      |      |      |      |      |
|                                          | (1)    | -----                                                                                             |      |      |      |      |      |      |      |      |      |
|                                          |        | Section 77                                                                                        |      |      |      |      |      |      |      |      |      |
| T4 NC 000866.4<br>SARS-CoV-2 NC_045512.2 | (7297) | 7297                                                                                              | 7304 | 7315 | 7326 | 7337 | 7348 | 7359 | 7370 | 7381 | 7392 |
|                                          | (7297) | CCATCTTCCAATCCATTGGTCAGTTACCCAACCAACCAATCGGATTCGCAAATGGACGACGAATGTAAACTGCCTTACACAACAAATCAGTCGGGTC |      |      |      |      |      |      |      |      |      |
|                                          | (1)    | -----                                                                                             |      |      |      |      |      |      |      |      |      |

## SARS-CoV-2 &amp; T4.apr

|                                          |        |                                                                                                      |      |      |      |      |      |      |      |      |      |
|------------------------------------------|--------|------------------------------------------------------------------------------------------------------|------|------|------|------|------|------|------|------|------|
|                                          |        | Section 78                                                                                           |      |      |      |      |      |      |      |      |      |
| T4 NC 000866.4<br>SARS-CoV-2 NC_045512.2 | (7393) | 7393                                                                                                 | 7403 | 7414 | 7425 | 7436 | 7447 | 7458 | 7469 | 7488 |      |
|                                          | (7393) | TTCAGGTTTTTCAATTTCTGTCAATAGATTAATAATCTTCTTCATAGATGATGAATGATGATACCCTTCCATAATAGTTTCTAATTTCCATGTACAC    |      |      |      |      |      |      |      |      |      |
|                                          | (1)    | -----                                                                                                |      |      |      |      |      |      |      |      |      |
|                                          |        | Section 79                                                                                           |      |      |      |      |      |      |      |      |      |
| T4 NC 000866.4<br>SARS-CoV-2 NC_045512.2 | (7489) | 7489                                                                                                 | 7502 | 7513 | 7524 | 7535 | 7546 | 7557 | 7568 | 7584 |      |
|                                          | (7489) | TGTACCAATGAGAATTCCACTATTAACACTAATGACAGTAAAAGGATATCCGCCAGTTGTACCAAGAAGTTCCCAAATTTGCTATCAGTCGTATT      |      |      |      |      |      |      |      |      |      |
|                                          | (1)    | -----                                                                                                |      |      |      |      |      |      |      |      |      |
|                                          |        | Section 80                                                                                           |      |      |      |      |      |      |      |      |      |
| T4 NC 000866.4<br>SARS-CoV-2 NC_045512.2 | (7585) | 7585                                                                                                 | 7590 | 7601 | 7612 | 7623 | 7634 | 7645 | 7656 | 7667 | 7680 |
|                                          | (7585) | CGACATTGTCTGAAAAATCAATTTTCAGATGGTTTTTTTCATTTTGATACGCAGTATTAATTTTAATCATAATTTTCTCTTTAGTTTAAGGTAATAAAGC |      |      |      |      |      |      |      |      |      |
|                                          | (1)    | -----                                                                                                |      |      |      |      |      |      |      |      |      |
|                                          |        | Section 81                                                                                           |      |      |      |      |      |      |      |      |      |
| T4 NC 000866.4<br>SARS-CoV-2 NC_045512.2 | (7681) | 7681                                                                                                 | 7689 | 7700 | 7711 | 7722 | 7733 | 7744 | 7755 | 7776 |      |
|                                          | (7681) | CTTTTAGTTTCGGCATAGGATTTACGGAACATTACTTGATGCCCGCCAATGATAACTTGGTCATCTGGTACTTCGTATACAGCAAGATAAAATCCTT    |      |      |      |      |      |      |      |      |      |
|                                          | (1)    | -----                                                                                                |      |      |      |      |      |      |      |      |      |
|                                          |        | Section 82                                                                                           |      |      |      |      |      |      |      |      |      |
| T4 NC 000866.4<br>SARS-CoV-2 NC_045512.2 | (7777) | 7777                                                                                                 | 7788 | 7799 | 7810 | 7821 | 7832 | 7843 | 7854 | 7872 |      |
|                                          | (7777) | TCGAAGCTAATTCTTCACGCTCTTCTCGTGTGAACCATTTTCATCATATCATATTCGCTAGCAAAGCAAATGATAAAGAGCTACAAACCATCCGG      |      |      |      |      |      |      |      |      |      |
|                                          | (1)    | -----                                                                                                |      |      |      |      |      |      |      |      |      |
|                                          |        | Section 83                                                                                           |      |      |      |      |      |      |      |      |      |
| T4 NC 000866.4<br>SARS-CoV-2 NC_045512.2 | (7873) | 7873                                                                                                 | 7887 | 7898 | 7909 | 7920 | 7931 | 7942 | 7953 | 7968 |      |
|                                          | (7873) | GAATATGATATTCTACTCCAACATAATCTTCTTGAACCTAGTATTAATTACGATATTAGCATTTTTAACTAATAGTTTGTCTTCGTGCGGCACAG      |      |      |      |      |      |      |      |      |      |
|                                          | (1)    | -----                                                                                                |      |      |      |      |      |      |      |      |      |
|                                          |        | Section 84                                                                                           |      |      |      |      |      |      |      |      |      |
| T4 NC 000866.4<br>SARS-CoV-2 NC_045512.2 | (7969) | 7969                                                                                                 | 7975 | 7986 | 7997 | 8008 | 8019 | 8030 | 8041 | 8052 | 8064 |
|                                          | (7969) | GAATTCCTTTTATTATCATTACTATGATGCATAAAATTAGGTCTGTCATAACCTACATGTAATAACCACTCTTCACTCCATGAATCTATTATACTTC    |      |      |      |      |      |      |      |      |      |
|                                          | (1)    | -----                                                                                                |      |      |      |      |      |      |      |      |      |

## SARS-CoV-2 &amp; T4.apr

|                                          |        |                                                                                                    |      |      |      |      |      |      |      |      |      |
|------------------------------------------|--------|----------------------------------------------------------------------------------------------------|------|------|------|------|------|------|------|------|------|
|                                          |        | Section 85                                                                                         |      |      |      |      |      |      |      |      |      |
| T4 NC 000866.4<br>SARS-CoV-2 NC_045512.2 | (8065) | 8065                                                                                               | 8074 | 8085 | 8096 | 8107 | 8118 | 8129 | 8140 | 8160 |      |
|                                          | (8065) | TATACGGCGTTATTGTAACACAAAGATCTCGGCGTATTGTTATAGCGTCTTCATAATTAAGAATACTAAACGATGATTCAACACGATAAATTTTCA   |      |      |      |      |      |      |      |      |      |
|                                          | (1)    | -----                                                                                              |      |      |      |      |      |      |      |      |      |
|                                          |        | Section 86                                                                                         |      |      |      |      |      |      |      |      |      |
| T4 NC 000866.4<br>SARS-CoV-2 NC_045512.2 | (8161) | 8161                                                                                               | 8173 | 8184 | 8195 | 8206 | 8217 | 8228 | 8239 | 8256 |      |
|                                          | (8161) | TTTTATTATCCTCAGTAGCTATGGTGTTATAGTACCACAACCTAACCGAGGAAGTAAACAACCTTTTTATCGTTTTGTTGGAAGAGATAGAGGATCGC |      |      |      |      |      |      |      |      |      |
|                                          | (1)    | -----                                                                                              |      |      |      |      |      |      |      |      |      |
|                                          |        | Section 87                                                                                         |      |      |      |      |      |      |      |      |      |
| T4 NC 000866.4<br>SARS-CoV-2 NC_045512.2 | (8257) | 8257                                                                                               | 8272 | 8283 | 8294 | 8305 | 8316 | 8327 | 8338 | 8352 |      |
|                                          | (8257) | ATTCTTCCTCTGATGGAGCATCTTCAAGACCCATAGCATATCGCAAAGCATACTTCATCATCAGGATGTCTTTCGCACAGTCATGAATAGAATCAT   |      |      |      |      |      |      |      |      |      |
|                                          | (1)    | -----                                                                                              |      |      |      |      |      |      |      |      |      |
|                                          |        | Section 88                                                                                         |      |      |      |      |      |      |      |      |      |
| T4 NC 000866.4<br>SARS-CoV-2 NC_045512.2 | (8353) | 8353                                                                                               | 8360 | 8371 | 8382 | 8393 | 8404 | 8415 | 8426 | 8437 | 8448 |
|                                          | (8353) | GTGCAACGAATCCATCTAAAGTTCCCTTTGGAAGAGGACACGTTGTCATATCACGAACAAGCAGAAGTGCTTCAATTCTAGTACGAATATCACGCT   |      |      |      |      |      |      |      |      |      |
|                                          | (1)    | -----                                                                                              |      |      |      |      |      |      |      |      |      |
|                                          |        | Section 89                                                                                         |      |      |      |      |      |      |      |      |      |
| T4 NC 000866.4<br>SARS-CoV-2 NC_045512.2 | (8449) | 8449                                                                                               | 8459 | 8470 | 8481 | 8492 | 8503 | 8514 | 8525 | 8544 |      |
|                                          | (8449) | GATTCCAAAATTTACAAGGTTCTAACTTAAATGTATCAAGCTCATTCTCGGAAACGCCGTTAAGACGTTGAATATCGCGAATAAGATCGACTAAAA   |      |      |      |      |      |      |      |      |      |
|                                          | (1)    | -----                                                                                              |      |      |      |      |      |      |      |      |      |
|                                          |        | Section 90                                                                                         |      |      |      |      |      |      |      |      |      |
| T4 NC 000866.4<br>SARS-CoV-2 NC_045512.2 | (8545) | 8545                                                                                               | 8558 | 8569 | 8580 | 8591 | 8602 | 8613 | 8624 | 8640 |      |
|                                          | (8545) | TTGGAAAATCAAACGACATTCCACGGCACCAGCCTTGAGATTTCCAAGGATCGATATTATGTGCATTGATGTAATCATTAAATTTTGCAATACCGT   |      |      |      |      |      |      |      |      |      |
|                                          | (1)    | -----                                                                                              |      |      |      |      |      |      |      |      |      |
|                                          |        | Section 91                                                                                         |      |      |      |      |      |      |      |      |      |
| T4 NC 000866.4<br>SARS-CoV-2 NC_045512.2 | (8641) | 8641                                                                                               | 8646 | 8657 | 8668 | 8679 | 8690 | 8701 | 8712 | 8723 | 8736 |
|                                          | (8641) | CGATAGTGCTTACATCTTCATCGGATGGTGCAATATTTTTTCGAGCTTCAGGAGATTGATTCTTCCACCATTCGATAGTACTTTTAGTAAAAAGAC   |      |      |      |      |      |      |      |      |      |
|                                          | (1)    | -----                                                                                              |      |      |      |      |      |      |      |      |      |

## SARS-CoV-2 &amp; T4.apr

|                                          |        |                                                                                                   |      |      |      |      |      |      |      |      |      |
|------------------------------------------|--------|---------------------------------------------------------------------------------------------------|------|------|------|------|------|------|------|------|------|
|                                          |        | Section 92                                                                                        |      |      |      |      |      |      |      |      |      |
| T4 NC 000866.4<br>SARS-CoV-2 NC_045512.2 | (8737) | 8737                                                                                              | 8745 | 8756 | 8767 | 8778 | 8789 | 8800 | 8811 | 8832 |      |
|                                          | (8737) | GGTGTCTTTTTGGCTTTTAAATCAAATTTGATTTTAATGCCACGTGAAACTAATTCATCGAATGTTTCAACTACTTCTGGATTAGGGTCAAAAG    |      |      |      |      |      |      |      |      |      |
|                                          | (1)    | -----                                                                                             |      |      |      |      |      |      |      |      |      |
|                                          |        | Section 93                                                                                        |      |      |      |      |      |      |      |      |      |
| T4 NC 000866.4<br>SARS-CoV-2 NC_045512.2 | (8833) | 8833                                                                                              | 8844 | 8855 | 8866 | 8877 | 8888 | 8899 | 8910 | 8928 |      |
|                                          | (8833) | CAATTACAGCCAAATCAATAACCGCTGCTTTTTACCACCTTCCCATTGTTTCAAATCTATAATAAAATCAAACATTAAATTTTCCTCGCTAAATC   |      |      |      |      |      |      |      |      |      |
|                                          | (1)    | -----                                                                                             |      |      |      |      |      |      |      |      |      |
|                                          |        | Section 94                                                                                        |      |      |      |      |      |      |      |      |      |
| T4 NC 000866.4<br>SARS-CoV-2 NC_045512.2 | (8929) | 8929                                                                                              | 8943 | 8954 | 8965 | 8976 | 8987 | 8998 | 9009 | 9024 |      |
|                                          | (8929) | ACGAATTTGACCTACAGTATAGTCTTGAATATAAACTTTTATTAATAGGCTCATCAATAAAATTTTGCCATAGATTCAATATCTTTTGTATTTCTTC |      |      |      |      |      |      |      |      |      |
|                                          | (1)    | -----                                                                                             |      |      |      |      |      |      |      |      |      |
|                                          |        | Section 95                                                                                        |      |      |      |      |      |      |      |      |      |
| T4 NC 000866.4<br>SARS-CoV-2 NC_045512.2 | (9025) | 9025                                                                                              | 9031 | 9042 | 9053 | 9064 | 9075 | 9086 | 9097 | 9108 | 9120 |
|                                          | (9025) | AAGACTGTATACTATCTTTGAAGCTTTTTCGCGAATAGTGATATTTTCAGGACCCGGATTTTCTTGAATGACAACCTTTAACATTTGTCATAAGAGA |      |      |      |      |      |      |      |      |      |
|                                          | (1)    | -----                                                                                             |      |      |      |      |      |      |      |      |      |
|                                          |        | Section 96                                                                                        |      |      |      |      |      |      |      |      |      |
| T4 NC 000866.4<br>SARS-CoV-2 NC_045512.2 | (9121) | 9121                                                                                              | 9130 | 9141 | 9152 | 9163 | 9174 | 9185 | 9196 | 9216 |      |
|                                          | (9121) | TTTAAACTGGTACCAACTTAATTCATTAATAATCGCCTCATAAAGATAGCTAATTTGCGCTAAACATAATCATTGATTGTAACAGTTTTAA       |      |      |      |      |      |      |      |      |      |
|                                          | (1)    | -----                                                                                             |      |      |      |      |      |      |      |      |      |
|                                          |        | Section 97                                                                                        |      |      |      |      |      |      |      |      |      |
| T4 NC 000866.4<br>SARS-CoV-2 NC_045512.2 | (9217) | 9217                                                                                              | 9229 | 9240 | 9251 | 9262 | 9273 | 9284 | 9295 | 9312 |      |
|                                          | (9217) | CTTCACCGCAAAAGAATTCTAACGCAATTAAATCTCGTTCAATTTCTTCTAATTGAAGCATCAACTTACTAGATTCAATTTTTACAGTTTCACGAT  |      |      |      |      |      |      |      |      |      |
|                                          | (1)    | -----                                                                                             |      |      |      |      |      |      |      |      |      |
|                                          |        | Section 98                                                                                        |      |      |      |      |      |      |      |      |      |
| T4 NC 000866.4<br>SARS-CoV-2 NC_045512.2 | (9313) | 9313                                                                                              | 9328 | 9339 | 9350 | 9361 | 9372 | 9383 | 9394 | 9408 |      |
|                                          | (9313) | TTTTGCTATAAGCTATTTCAATAATTTGCTTACTTTATCTTGAAGAAGATAAACTGATCTTTAGTTATTTCCACGAATAGCTTCCTCAAATTTA    |      |      |      |      |      |      |      |      |      |
|                                          | (1)    | -----                                                                                             |      |      |      |      |      |      |      |      |      |

## SARS-CoV-2 &amp; T4.apr

|                        |        |                                                                                                   |      |       |       |       |       |       |       |      |       |
|------------------------|--------|---------------------------------------------------------------------------------------------------|------|-------|-------|-------|-------|-------|-------|------|-------|
|                        |        | Section 99                                                                                        |      |       |       |       |       |       |       |      |       |
|                        | (9409) | 9409                                                                                              | 9416 | 9427  | 9438  | 9449  | 9460  | 9471  | 9482  | 9493 | 9504  |
| T4 NC 000866.4         | (9409) | ATCATACATAAAACACATCATAACGACCACGGGTGACACCAACATAAAGAAGTTGTTGAGCTAATTCAACATCTGCATAATGAATACAAGGCGTAT  |      |       |       |       |       |       |       |      |       |
| SARS-CoV-2 NC_045512.2 | (1)    | -----                                                                                             |      |       |       |       |       |       |       |      |       |
|                        |        | Section 100                                                                                       |      |       |       |       |       |       |       |      |       |
|                        | (9505) | 9505                                                                                              | 9515 | 9526  | 9537  | 9548  | 9559  | 9570  | 9581  |      | 9600  |
| T4 NC 000866.4         | (9505) | AAATGAAAGCACGGTCTACAGACATACCCTGCGCTTTATGGAATGTTGATGCAGGAAGTGCTTTCACTTTACTAAACTGTGATTTAGCATCCCAAA  |      |       |       |       |       |       |       |      |       |
| SARS-CoV-2 NC_045512.2 | (1)    | -----                                                                                             |      |       |       |       |       |       |       |      |       |
|                        |        | Section 101                                                                                       |      |       |       |       |       |       |       |      |       |
|                        | (9601) | 9601                                                                                              | 9614 | 9625  | 9636  | 9647  | 9658  | 9669  | 9680  |      | 9696  |
| T4 NC 000866.4         | (9601) | AATCACTCCACGGAGCTTTTCCGCCTTTGTTCCAATTTTTATAAGTTTCTGCTGTTTTAGCTAAAAATAGGTTAACTTATACAATTCTTCGTCAG   |      |       |       |       |       |       |       |      |       |
| SARS-CoV-2 NC_045512.2 | (1)    | -----                                                                                             |      |       |       |       |       |       |       |      |       |
|                        |        | Section 102                                                                                       |      |       |       |       |       |       |       |      |       |
|                        | (9697) | 9697                                                                                              | 9702 | 9713  | 9724  | 9735  | 9746  | 9757  | 9768  | 9779 | 9792  |
| T4 NC 000866.4         | (9697) | ATGAAATTATTTTAATCTTTTCACGATAATATTCATCATCGCCATAAGTTTCTACTGTAAATCCCAATGACGAATTAGATATTCTCCAGGAACAC   |      |       |       |       |       |       |       |      |       |
| SARS-CoV-2 NC_045512.2 | (1)    | -----                                                                                             |      |       |       |       |       |       |       |      |       |
|                        |        | Section 103                                                                                       |      |       |       |       |       |       |       |      |       |
|                        | (9793) | 9793                                                                                              | 9801 | 9812  | 9823  | 9834  | 9845  | 9856  | 9867  |      | 9888  |
| T4 NC 000866.4         | (9793) | CACGGGCTTTAACAAACGTTGATGTATACTCTGCTTCTATAATACGAACTAATTGTCCGTTATTAAAAATAATTTCTGACACAGGCTTTCCATCAA  |      |       |       |       |       |       |       |      |       |
| SARS-CoV-2 NC_045512.2 | (1)    | -----                                                                                             |      |       |       |       |       |       |       |      |       |
|                        |        | Section 104                                                                                       |      |       |       |       |       |       |       |      |       |
|                        | (9889) | 9889                                                                                              | 9900 | 9911  | 9922  | 9933  | 9944  | 9955  | 9966  |      | 9984  |
| T4 NC 000866.4         | (9889) | TTTTATATGTTTTAAATAATGGTTCCTGCATTACAATAATTTACCGACAATAAAATCTTTATCAGTTTCAAAAATCTTTTTACGAATAATGCTAT   |      |       |       |       |       |       |       |      |       |
| SARS-CoV-2 NC_045512.2 | (1)    | -----                                                                                             |      |       |       |       |       |       |       |      |       |
|                        |        | Section 105                                                                                       |      |       |       |       |       |       |       |      |       |
|                        | (9985) | 9985                                                                                              | 9999 | 10010 | 10021 | 10032 | 10043 | 10054 | 10065 |      | 10080 |
| T4 NC 000866.4         | (9985) | TTAACTTGTC AACAGATTTATTCGTAAATGCCATTACGCGATTTTCAAACAAATCATCTAGTGATTTGACGATTGAAAAATAATTTACCATAAAAT |      |       |       |       |       |       |       |      |       |
| SARS-CoV-2 NC_045512.2 | (1)    | -----                                                                                             |      |       |       |       |       |       |       |      |       |

## SARS-CoV-2 &amp; T4.apr

|                                          |         |                                                                                                   |       |       |       |       |       |       |       |       |       |
|------------------------------------------|---------|---------------------------------------------------------------------------------------------------|-------|-------|-------|-------|-------|-------|-------|-------|-------|
| Section 106                              |         |                                                                                                   |       |       |       |       |       |       |       |       |       |
| T4 NC 000866.4<br>SARS-CoV-2 NC_045512.2 | (10081) | 10081                                                                                             | 10087 | 10098 | 10109 | 10120 | 10131 | 10142 | 10153 | 10164 | 10176 |
|                                          | (10081) | CGCGTAAAGCGGTATCACCAGTAAATCCACGTACTCCATGCCCGTCAACAACCTTTATCATAATTCCACTTACCGTTGCGAACGTCAGTAGCTACAT |       |       |       |       |       |       |       |       |       |
|                                          | (1)     | -----                                                                                             |       |       |       |       |       |       |       |       |       |
| Section 107                              |         |                                                                                                   |       |       |       |       |       |       |       |       |       |
| T4 NC 000866.4<br>SARS-CoV-2 NC_045512.2 | (10177) | 10177                                                                                             | 10186 | 10197 | 10208 | 10219 | 10230 | 10241 | 10252 | 10272 |       |
|                                          | (10177) | CAATAATAGGAGCATTACTGCGTTTAACTTCAGTGAGTTCACACTGATAAAAAATCTTTATGTGTAAAGAATGGACTGATATAAGCAGTATTTTCTC |       |       |       |       |       |       |       |       |       |
|                                          | (1)     | -----                                                                                             |       |       |       |       |       |       |       |       |       |
| Section 108                              |         |                                                                                                   |       |       |       |       |       |       |       |       |       |
| T4 NC 000866.4<br>SARS-CoV-2 NC_045512.2 | (10273) | 10273                                                                                             | 10285 | 10296 | 10307 | 10318 | 10329 | 10340 | 10351 | 10368 |       |
|                                          | (10273) | CTGGTTCAACAGGTCTGATTTGCTTATTATCCCCTATTCCAATTATAGTACACCAAGGTGGAATAGTTGAAAGCAGAATTTTAAATAGCTTTCTAT  |       |       |       |       |       |       |       |       |       |
|                                          | (1)     | -----                                                                                             |       |       |       |       |       |       |       |       |       |
| Section 109                              |         |                                                                                                   |       |       |       |       |       |       |       |       |       |
| T4 NC 000866.4<br>SARS-CoV-2 NC_045512.2 | (10369) | 10369                                                                                             | 10384 | 10395 | 10406 | 10417 | 10428 | 10439 | 10450 | 10464 |       |
|                                          | (10369) | CATACATTGACACTTCGTCGCAGATTAATACTCTGCATTTGGCTAAATCAGGTACTTCTTTTTGTTCAAAAAGAACATTTTCTTCATATGTTACTG  |       |       |       |       |       |       |       |       |       |
|                                          | (1)     | -----                                                                                             |       |       |       |       |       |       |       |       |       |
| Section 110                              |         |                                                                                                   |       |       |       |       |       |       |       |       |       |
| T4 NC 000866.4<br>SARS-CoV-2 NC_045512.2 | (10465) | 10465                                                                                             | 10472 | 10483 | 10494 | 10505 | 10516 | 10527 | 10538 | 10549 | 10560 |
|                                          | (10465) | GGTTAATTTTAAGAATACTATGAATAGTACTCGCTTCTTTCCCTGATAGTTTTGAAAGAATCTTTTTAGCTGCATGTGTAGGAGCTGCTAAAATAA  |       |       |       |       |       |       |       |       |       |
|                                          | (1)     | -----                                                                                             |       |       |       |       |       |       |       |       |       |
| Section 111                              |         |                                                                                                   |       |       |       |       |       |       |       |       |       |
| T4 NC 000866.4<br>SARS-CoV-2 NC_045512.2 | (10561) | 10561                                                                                             | 10571 | 10582 | 10593 | 10604 | 10615 | 10626 | 10637 | 10656 |       |
|                                          | (10561) | TACCAGTTCCACCCGTAGATATTAAAGCTTCAATGATGAACTTAGTAAGAGTAGTCTTACCGGTACCAGCAGGTCCATTAATAGTTACATGATGTT  |       |       |       |       |       |       |       |       |       |
|                                          | (1)     | -----                                                                                             |       |       |       |       |       |       |       |       |       |
| Section 112                              |         |                                                                                                   |       |       |       |       |       |       |       |       |       |
| T4 NC 000866.4<br>SARS-CoV-2 NC_045512.2 | (10657) | 10657                                                                                             | 10670 | 10681 | 10692 | 10703 | 10714 | 10725 | 10736 | 10752 |       |
|                                          | (10657) | TCTTTTCTTTAATAGCCTTCATAACAATGTTAAAGGCATTTTTCTGGCCTTCGGTCAAATCATCAAATGTCATCGTAAATTCCCTGCAATTGGTAT  |       |       |       |       |       |       |       |       |       |
|                                          | (1)     | -----                                                                                             |       |       |       |       |       |       |       |       |       |



## SARS-CoV-2 &amp; T4.apr

|                                          |         |                                                                                                    |       |       |       |       |       |       |       |       |       |
|------------------------------------------|---------|----------------------------------------------------------------------------------------------------|-------|-------|-------|-------|-------|-------|-------|-------|-------|
| Section 113                              |         |                                                                                                    |       |       |       |       |       |       |       |       |       |
| T4 NC 000866.4<br>SARS-CoV-2 NC_045512.2 | (10753) | 10753                                                                                              | 10758 | 10769 | 10780 | 10791 | 10802 | 10813 | 10824 | 10835 | 10848 |
|                                          | (10753) | ACTAACAATACGCCAGTATCTAAAAATTCGCTGATATAATCTTTGCGTGTCTACGTCAGGCTTAACATGTTTAACTTCTATTTTATTAAACCAAAA   |       |       |       |       |       |       |       |       |       |
|                                          | (1)     | -----                                                                                              |       |       |       |       |       |       |       |       |       |
| Section 114                              |         |                                                                                                    |       |       |       |       |       |       |       |       |       |
| T4 NC 000866.4<br>SARS-CoV-2 NC_045512.2 | (10849) | 10849                                                                                              | 10857 | 10868 | 10879 | 10890 | 10901 | 10912 | 10923 |       | 10944 |
|                                          | (10849) | TTTACGTGGAGTCTCAACTAATCTTGAATTCCCTTACCTAAAGCTAATCGATACTGCTCTTTAAGAGTGGTAAATACTTTATCAGCAATCTTCCA    |       |       |       |       |       |       |       |       |       |
|                                          | (1)     | -----                                                                                              |       |       |       |       |       |       |       |       |       |
| Section 115                              |         |                                                                                                    |       |       |       |       |       |       |       |       |       |
| T4 NC 000866.4<br>SARS-CoV-2 NC_045512.2 | (10945) | 10945                                                                                              | 10956 | 10967 | 10978 | 10989 | 11000 | 11011 | 11022 |       | 11040 |
|                                          | (10945) | TTCAAAAAATACAGCAGGACGATGTTTCATCAAGCGGAACCTGGCGCTGTAAATCCGTCTTTGTCTCGGTAAACTATCGCATATACATAAACCATATT |       |       |       |       |       |       |       |       |       |
|                                          | (1)     | -----                                                                                              |       |       |       |       |       |       |       |       |       |
| Section 116                              |         |                                                                                                    |       |       |       |       |       |       |       |       |       |
| T4 NC 000866.4<br>SARS-CoV-2 NC_045512.2 | (11041) | 11041                                                                                              | 11055 | 11066 | 11077 | 11088 | 11099 | 11110 | 11121 |       | 11136 |
|                                          | (11041) | ATCCTCGGATAAGTTTAAAAATTGAACAATTTAGCGGATATCCTCTTTTCAGTTTAAAGTTTATCAATAAAAGACAAATTTTGATACCGCTCTACAC  |       |       |       |       |       |       |       |       |       |
|                                          | (1)     | -----                                                                                              |       |       |       |       |       |       |       |       |       |
| Section 117                              |         |                                                                                                    |       |       |       |       |       |       |       |       |       |
| T4 NC 000866.4<br>SARS-CoV-2 NC_045512.2 | (11137) | 11137                                                                                              | 11143 | 11154 | 11165 | 11176 | 11187 | 11198 | 11209 | 11220 | 11232 |
|                                          | (11137) | CTTGAATAATTTTATCACACATATCATATTGCATTTCTGCTTCTGACAACTTTTTCACAATTTTCCAATCCGAGCCTTTAAGAAGAACGTTCAATT   |       |       |       |       |       |       |       |       |       |
|                                          | (1)     | -----                                                                                              |       |       |       |       |       |       |       |       |       |
| Section 118                              |         |                                                                                                    |       |       |       |       |       |       |       |       |       |
| T4 NC 000866.4<br>SARS-CoV-2 NC_045512.2 | (11233) | 11233                                                                                              | 11242 | 11253 | 11264 | 11275 | 11286 | 11297 | 11308 |       | 11328 |
|                                          | (11233) | TAACAACCTTCAGCGCCTTCTGCTATGCGGAGAACCATCAATACGTGCTTTAAGTGCTATAATTCTCAGCTTAATGTCAGAGGTCTGTTTTGATTTAG |       |       |       |       |       |       |       |       |       |
|                                          | (1)     | -----                                                                                              |       |       |       |       |       |       |       |       |       |
| Section 119                              |         |                                                                                                    |       |       |       |       |       |       |       |       |       |
| T4 NC 000866.4<br>SARS-CoV-2 NC_045512.2 | (11329) | 11329                                                                                              | 11341 | 11352 | 11363 | 11374 | 11385 | 11396 | 11407 |       | 11424 |
|                                          | (11329) | AAAGCTGAGAAATGTGTTCAATTCGATTTTTCACGTTTTTCTGTATAGCTTTAATTTGATTATAAGTCTTTTTGATTTTAGCCCATTTCTTTTCAT   |       |       |       |       |       |       |       |       |       |
|                                          | (1)     | -----                                                                                              |       |       |       |       |       |       |       |       |       |

## SARS-CoV-2 &amp; T4.apr

|                                          |         |                                                                                                    |       |       |       |       |       |       |       |       |       |
|------------------------------------------|---------|----------------------------------------------------------------------------------------------------|-------|-------|-------|-------|-------|-------|-------|-------|-------|
|                                          |         | Section 120                                                                                        |       |       |       |       |       |       |       |       |       |
| T4 NC 000866.4<br>SARS-CoV-2 NC_045512.2 | (11425) | 11425                                                                                              | 11440 | 11451 | 11462 | 11473 | 11484 | 11495 | 11506 | 11520 |       |
|                                          | (11425) | CTAAATTTAGTTTATGAACTTTTTTCGCAGATGAACGACCAATTTCGCAAAGCAAATAAATCACGCTTTTCAATCAACTCTTCTAAAGTATAATCAG  |       |       |       |       |       |       |       |       |       |
|                                          | (1)     | -----                                                                                              |       |       |       |       |       |       |       |       |       |
|                                          |         | Section 121                                                                                        |       |       |       |       |       |       |       |       |       |
| T4 NC 000866.4<br>SARS-CoV-2 NC_045512.2 | (11521) | 11521                                                                                              | 11528 | 11539 | 11550 | 11561 | 11572 | 11583 | 11594 | 11605 | 11616 |
|                                          | (11521) | AACGAAATGTATTATACTTTTTCTTTACTGCAATAACATTCCCTTTAATGTATCCAACGTTATTATCAAAACGTTCTAATGATAATTTCTCTCCTT   |       |       |       |       |       |       |       |       |       |
|                                          | (1)     | -----                                                                                              |       |       |       |       |       |       |       |       |       |
|                                          |         | Section 122                                                                                        |       |       |       |       |       |       |       |       |       |
| T4 NC 000866.4<br>SARS-CoV-2 NC_045512.2 | (11617) | 11617                                                                                              | 11627 | 11638 | 11649 | 11660 | 11671 | 11682 | 11693 | 11712 |       |
|                                          | (11617) | CAATACGATTATCAAAAAGGTTCTCCCGAGTAAGCACAAACTTTTTGATCTAAAATGTTCTTAATGTAATTGAAGTCTAAGTTAAAATCTTTAGAAC  |       |       |       |       |       |       |       |       |       |
|                                          | (1)     | -----                                                                                              |       |       |       |       |       |       |       |       |       |
|                                          |         | Section 123                                                                                        |       |       |       |       |       |       |       |       |       |
| T4 NC 000866.4<br>SARS-CoV-2 NC_045512.2 | (11713) | 11713                                                                                              | 11726 | 11737 | 11748 | 11759 | 11770 | 11781 | 11792 | 11808 |       |
|                                          | (11713) | GTCTTTTTTGCAGATGCCTGAGTATGCTCTAAACGACGTTTAAATTTTACGAATTTGGTTATTAGACAGCTTCATATTTTTCTCACATCTTACGGACG |       |       |       |       |       |       |       |       |       |
|                                          | (1)     | -----                                                                                              |       |       |       |       |       |       |       |       |       |
|                                          |         | Section 124                                                                                        |       |       |       |       |       |       |       |       |       |
| T4 NC 000866.4<br>SARS-CoV-2 NC_045512.2 | (11809) | 11809                                                                                              | 11814 | 11825 | 11836 | 11847 | 11858 | 11869 | 11880 | 11891 | 11904 |
|                                          | (11809) | GTTAACTACTTATACTATAACATTTTACTTTAACTTGTAACAACCTTTATGAAAAATGCTTTAAACCTTTCATGGTATAATGAATCTAAGTCCTT    |       |       |       |       |       |       |       |       |       |
|                                          | (1)     | -----                                                                                              |       |       |       |       |       |       |       |       |       |
|                                          |         | Section 125                                                                                        |       |       |       |       |       |       |       |       |       |
| T4 NC 000866.4<br>SARS-CoV-2 NC_045512.2 | (11905) | 11905                                                                                              | 11913 | 11924 | 11935 | 11946 | 11957 | 11968 | 11979 | 12000 |       |
|                                          | (11905) | CCATTATAGATTAAATCCTTCAAAATCAAGAGTATAGATAGTGTATGTTGAACACTTTTTATACTCATATCTATCTGCAATTCTAAATACACTTCC   |       |       |       |       |       |       |       |       |       |
|                                          | (1)     | -----                                                                                              |       |       |       |       |       |       |       |       |       |
|                                          |         | Section 126                                                                                        |       |       |       |       |       |       |       |       |       |
| T4 NC 000866.4<br>SARS-CoV-2 NC_045512.2 | (12001) | 12001                                                                                              | 12012 | 12023 | 12034 | 12045 | 12056 | 12067 | 12078 | 12096 |       |
|                                          | (12001) | AGCTGGTATCATTACTTCTTGTTTCATCTGAAACTAATTCATATTACGATAACGATGACTATCCGGAACTTAAAGTTTGGATTGTATTCTTTACA    |       |       |       |       |       |       |       |       |       |
|                                          | (1)     | -----                                                                                              |       |       |       |       |       |       |       |       |       |

## SARS-CoV-2 &amp; T4.apr

|                                          |         |                                                                                                     |       |       |       |       |       |       |       |       |       |
|------------------------------------------|---------|-----------------------------------------------------------------------------------------------------|-------|-------|-------|-------|-------|-------|-------|-------|-------|
|                                          |         | Section 127                                                                                         |       |       |       |       |       |       |       |       |       |
| T4 NC 000866.4<br>SARS-CoV-2 NC_045512.2 | (12097) | 12097                                                                                               | 12111 | 12122 | 12133 | 12144 | 12155 | 12166 | 12177 | 12192 |       |
|                                          | (12097) | GCGTAGAGCTTTTATAGCATACTCCTGGAAATTGAATACCATAGGAGCTTTGAATTCAAAAATAACTTGTTGTGTTATACTCTAAACCAGAAGCAAA   |       |       |       |       |       |       |       |       |       |
|                                          | (1)     | -----                                                                                               |       |       |       |       |       |       |       |       |       |
|                                          |         | Section 128                                                                                         |       |       |       |       |       |       |       |       |       |
| T4 NC 000866.4<br>SARS-CoV-2 NC_045512.2 | (12193) | 12193                                                                                               | 12199 | 12210 | 12221 | 12232 | 12243 | 12254 | 12265 | 12276 | 12288 |
|                                          | (12193) | ATGTAGAGCTATATTTTATCATATGAAGCTGATACGACTTTATCAAATGTAATAATATCAATTCCTTGATTTAATACTTGTTTAGTCTCAGCTGG     |       |       |       |       |       |       |       |       |       |
|                                          | (1)     | -----                                                                                               |       |       |       |       |       |       |       |       |       |
|                                          |         | Section 129                                                                                         |       |       |       |       |       |       |       |       |       |
| T4 NC 000866.4<br>SARS-CoV-2 NC_045512.2 | (12289) | 12289                                                                                               | 12298 | 12309 | 12320 | 12331 | 12342 | 12353 | 12364 | 12384 |       |
|                                          | (12289) | AACACCTCTCCAAAGAGGTTTATCGTTTGGAACCAAACGAGATTTGATTATTTCAATTAACCAAGAATGGTCATCTGGTTTATTAGTAATACAATG    |       |       |       |       |       |       |       |       |       |
|                                          | (1)     | -----                                                                                               |       |       |       |       |       |       |       |       |       |
|                                          |         | Section 130                                                                                         |       |       |       |       |       |       |       |       |       |
| T4 NC 000866.4<br>SARS-CoV-2 NC_045512.2 | (12385) | 12385                                                                                               | 12397 | 12408 | 12419 | 12430 | 12441 | 12452 | 12463 | 12480 |       |
|                                          | (12385) | AATTAAAAAGTTCAATTTTCAGATAAATTAAACCCTTCAGAAAGTAATTCCTTCACGAATAGAAGCACGCACCGATGCATCCATTGATTTTATTTTAAA |       |       |       |       |       |       |       |       |       |
|                                          | (1)     | -----                                                                                               |       |       |       |       |       |       |       |       |       |
|                                          |         | Section 131                                                                                         |       |       |       |       |       |       |       |       |       |
| T4 NC 000866.4<br>SARS-CoV-2 NC_045512.2 | (12481) | 12481                                                                                               | 12496 | 12507 | 12518 | 12529 | 12540 | 12551 | 12562 | 12576 |       |
|                                          | (12481) | ATCTTTTAGTTGCATTACTGAGTATTTCAATCAACTACCTCAATATCATAAACTTTAAATGTTCCAAATGAATCGTGTAATTTTCTTTTGAAATA     |       |       |       |       |       |       |       |       |       |
|                                          | (1)     | -----                                                                                               |       |       |       |       |       |       |       |       |       |
|                                          |         | Section 132                                                                                         |       |       |       |       |       |       |       |       |       |
| T4 NC 000866.4<br>SARS-CoV-2 NC_045512.2 | (12577) | 12577                                                                                               | 12584 | 12595 | 12606 | 12617 | 12628 | 12639 | 12650 | 12661 | 12672 |
|                                          | (12577) | GAAGTTATTTTATACTTTCCAATTGGAATCATCCATTCTTGTTACGCACAAATCATCATTAAGTTATCAGTACGCTCTGAATCTAATCCATCAGTA    |       |       |       |       |       |       |       |       |       |
|                                          | (1)     | -----                                                                                               |       |       |       |       |       |       |       |       |       |
|                                          |         | Section 133                                                                                         |       |       |       |       |       |       |       |       |       |
| T4 NC 000866.4<br>SARS-CoV-2 NC_045512.2 | (12673) | 12673                                                                                               | 12683 | 12694 | 12705 | 12716 | 12727 | 12738 | 12749 | 12768 |       |
|                                          | (12673) | TCTTCATACGTGTACTTAAACTCAGTATTAGGAGAAGAAAGTATAATATCGCTGATATGGTCAGAATAATTAAAAGCTTTATCAGTTTTTAAACGA    |       |       |       |       |       |       |       |       |       |
|                                          | (1)     | -----                                                                                               |       |       |       |       |       |       |       |       |       |

## SARS-CoV-2 &amp; T4.apr

|                                          |         |                                                                                                   |       |       |       |       |       |       |       |       |       |
|------------------------------------------|---------|---------------------------------------------------------------------------------------------------|-------|-------|-------|-------|-------|-------|-------|-------|-------|
|                                          |         | Section 134                                                                                       |       |       |       |       |       |       |       |       |       |
| T4 NC 000866.4<br>SARS-CoV-2 NC_045512.2 | (12769) | 12769                                                                                             | 12782 | 12793 | 12804 | 12815 | 12826 | 12837 | 12848 | 12864 |       |
|                                          | (12769) | AGTATTGTTTCAGTGAAATATTCAGCATAAGAAAAAGAACACGCTGTATGCAAACTAGTAGTAAATGAATCTACCCTGTTTCGTTGAAAACACTTCT |       |       |       |       |       |       |       |       |       |
|                                          | (1)     | -----                                                                                             |       |       |       |       |       |       |       |       |       |
|                                          |         | Section 135                                                                                       |       |       |       |       |       |       |       |       |       |
| T4 NC 000866.4<br>SARS-CoV-2 NC_045512.2 | (12865) | 12865                                                                                             | 12870 | 12881 | 12892 | 12903 | 12914 | 12925 | 12936 | 12947 | 12960 |
|                                          | (12865) | CCAAC TTGTAAATCTTTAATGAGTCTTTTGTCGATTTTGATATACCACGATATAATTGATAAGGCGATTTAGTTAAATGCTTTTTAATGATTTCA  |       |       |       |       |       |       |       |       |       |
|                                          | (1)     | -----                                                                                             |       |       |       |       |       |       |       |       |       |
|                                          |         | Section 136                                                                                       |       |       |       |       |       |       |       |       |       |
| T4 NC 000866.4<br>SARS-CoV-2 NC_045512.2 | (12961) | 12961                                                                                             | 12969 | 12980 | 12991 | 13002 | 13013 | 13024 | 13035 | 13056 |       |
|                                          | (12961) | TTTAAATGCTTATGAAGAGCTTCATTCTTTTTGGCTTCCATACATTGCCAAAGAACAGACTGCTCAAAGTCAGTAAATTTTTCACAGACCTTTTTA  |       |       |       |       |       |       |       |       |       |
|                                          | (1)     | -----                                                                                             |       |       |       |       |       |       |       |       |       |
|                                          |         | Section 137                                                                                       |       |       |       |       |       |       |       |       |       |
| T4 NC 000866.4<br>SARS-CoV-2 NC_045512.2 | (13057) | 13057                                                                                             | 13068 | 13079 | 13090 | 13101 | 13112 | 13123 | 13134 | 13152 |       |
|                                          | (13057) | TACATATCATATTGAAAAATCAACGCTTTCAGCTTTTATAGATAACTGTTCAACATCTGCAAGATTAATAATCATGATAGCCTCCGTATACTTCAGA |       |       |       |       |       |       |       |       |       |
|                                          | (1)     | -----                                                                                             |       |       |       |       |       |       |       |       |       |
|                                          |         | Section 138                                                                                       |       |       |       |       |       |       |       |       |       |
| T4 NC 000866.4<br>SARS-CoV-2 NC_045512.2 | (13153) | 13153                                                                                             | 13167 | 13178 | 13189 | 13200 | 13211 | 13222 | 13233 | 13248 |       |
|                                          | (13153) | AGCTATCATATCATCGTTAGAAAGGAAAGTAAACAACCTTTTTGAATTATTTTGCCAGGGAGCCCAAGGCGGAGGGTCAAGATGGTATGAAGCTAG  |       |       |       |       |       |       |       |       |       |
|                                          | (1)     | -----                                                                                             |       |       |       |       |       |       |       |       |       |
|                                          |         | Section 139                                                                                       |       |       |       |       |       |       |       |       |       |
| T4 NC 000866.4<br>SARS-CoV-2 NC_045512.2 | (13249) | 13249                                                                                             | 13255 | 13266 | 13277 | 13288 | 13299 | 13310 | 13321 | 13332 | 13344 |
|                                          | (13249) | TTCTTCTAGAAGAGCATCTGGGGCTTCAATTCCATAATTCTGTAATACTATACGGTACTCTTTCTTATAATCACTAGAATCATTCTGGTTATTCGT  |       |       |       |       |       |       |       |       |       |
|                                          | (1)     | -----                                                                                             |       |       |       |       |       |       |       |       |       |
|                                          |         | Section 140                                                                                       |       |       |       |       |       |       |       |       |       |
| T4 NC 000866.4<br>SARS-CoV-2 NC_045512.2 | (13345) | 13345                                                                                             | 13354 | 13365 | 13376 | 13387 | 13398 | 13409 | 13420 | 13440 |       |
|                                          | (13345) | AGAATGATTATCTTCTAACATCTCAAATAAATCCATATTAATTCCTAGCGATAAAAACCAAATTTACGATTAGTTTCAATGATCTTTCTTTCTTCT  |       |       |       |       |       |       |       |       |       |
|                                          | (1)     | -----                                                                                             |       |       |       |       |       |       |       |       |       |

## SARS-CoV-2 &amp; T4.apr

|                                          |         |                                                                                                   |       |       |       |       |       |       |       |       |       |
|------------------------------------------|---------|---------------------------------------------------------------------------------------------------|-------|-------|-------|-------|-------|-------|-------|-------|-------|
|                                          |         | Section 141                                                                                       |       |       |       |       |       |       |       |       |       |
| T4 NC 000866.4<br>SARS-CoV-2 NC_045512.2 | (13441) | 13441                                                                                             | 13453 | 13464 | 13475 | 13486 | 13497 | 13508 | 13519 | 13536 |       |
|                                          | (13441) | TCGGACATTCTCCAGCGTAGTCCAACATCAAAATGAGCCCAGACCATCCTAACAAATGCATTTATATCTTTAATATCTTCAATAATGAATGTTTTA  |       |       |       |       |       |       |       |       |       |
|                                          | (1)     | -----                                                                                             |       |       |       |       |       |       |       |       |       |
|                                          |         | Section 142                                                                                       |       |       |       |       |       |       |       |       |       |
| T4 NC 000866.4<br>SARS-CoV-2 NC_045512.2 | (13537) | 13537                                                                                             | 13552 | 13563 | 13574 | 13585 | 13596 | 13607 | 13618 | 13632 |       |
|                                          | (13537) | CTTTTAGAAGGTTGACTCGCTAATTTAACTTTATCGTCTTCAAACATGTCAAAAAGACCATATTCATGAGCTCTTTTATAGCCTTTAATAGTTAA   |       |       |       |       |       |       |       |       |       |
|                                          | (1)     | -----                                                                                             |       |       |       |       |       |       |       |       |       |
|                                          |         | Section 143                                                                                       |       |       |       |       |       |       |       |       |       |
| T4 NC 000866.4<br>SARS-CoV-2 NC_045512.2 | (13633) | 13633                                                                                             | 13640 | 13651 | 13662 | 13673 | 13684 | 13695 | 13706 | 13717 | 13728 |
|                                          | (13633) | GCTTCAGAAGAAGAAAAATGGTGAATCTGTATTCTGCAAAATATCTTCAGTATGCTTTATAATTAGAATAATATTTTCTGGATATTTCTTTCTTT   |       |       |       |       |       |       |       |       |       |
|                                          | (1)     | -----                                                                                             |       |       |       |       |       |       |       |       |       |
|                                          |         | Section 144                                                                                       |       |       |       |       |       |       |       |       |       |
| T4 NC 000866.4<br>SARS-CoV-2 NC_045512.2 | (13729) | 13729                                                                                             | 13739 | 13750 | 13761 | 13772 | 13783 | 13794 | 13805 | 13824 |       |
|                                          | (13729) | ATATCTTTAATTAAAAAATCCGGATTTTCTGCTAAAGGAATAATTAATGAGCAATTTTTATCAAGTGTATTTACTGATTTACCTTCTTTAGACATA  |       |       |       |       |       |       |       |       |       |
|                                          | (1)     | -----                                                                                             |       |       |       |       |       |       |       |       |       |
|                                          |         | Section 145                                                                                       |       |       |       |       |       |       |       |       |       |
| T4 NC 000866.4<br>SARS-CoV-2 NC_045512.2 | (13825) | 13825                                                                                             | 13838 | 13849 | 13860 | 13871 | 13882 | 13893 | 13904 | 13920 |       |
|                                          | (13825) | AATTCTATTGAATATAATTTTGCTACTTCAATCATGTGATTTCTTTTGCTTACTAATGGACCGTCAGGAATTTATTTTCTGGATATATTTCTC     |       |       |       |       |       |       |       |       |       |
|                                          | (1)     | -----                                                                                             |       |       |       |       |       |       |       |       |       |
|                                          |         | Section 146                                                                                       |       |       |       |       |       |       |       |       |       |
| T4 NC 000866.4<br>SARS-CoV-2 NC_045512.2 | (13921) | 13921                                                                                             | 13926 | 13937 | 13948 | 13959 | 13970 | 13981 | 13992 | 14003 | 14016 |
|                                          | (13921) | ATTTTCTTCCATCATTTTACTGCCAATTTAAGAAGCAAATCCATTGCTTCATTTGCTTTGCTTTAGCTTCTTCTAACGTCATATCTTTGTTTCAT   |       |       |       |       |       |       |       |       |       |
|                                          | (1)     | -----                                                                                             |       |       |       |       |       |       |       |       |       |
|                                          |         | Section 147                                                                                       |       |       |       |       |       |       |       |       |       |
| T4 NC 000866.4<br>SARS-CoV-2 NC_045512.2 | (14017) | 14017                                                                                             | 14025 | 14036 | 14047 | 14058 | 14069 | 14080 | 14091 | 14112 |       |
|                                          | (14017) | GATTTATCACCATAGATGTCTCTCATCAATTTAAGCGCTGAGCGTTCTAGTTTCTTTTCTTTCTCAGCACTAATCATTGATTTTCATCCATTCTTCT |       |       |       |       |       |       |       |       |       |
|                                          | (1)     | -----                                                                                             |       |       |       |       |       |       |       |       |       |

## SARS-CoV-2 &amp; T4.apr

|                                          |         |                                                                                                    |       |       |       |       |       |       |       |       |       |
|------------------------------------------|---------|----------------------------------------------------------------------------------------------------|-------|-------|-------|-------|-------|-------|-------|-------|-------|
|                                          |         | Section 148                                                                                        |       |       |       |       |       |       |       |       |       |
| T4 NC 000866.4<br>SARS-CoV-2 NC_045512.2 | (14113) | 14113                                                                                              | 14124 | 14135 | 14146 | 14157 | 14168 | 14179 | 14190 | 14208 |       |
|                                          | (14113) | GATTCATTCTGCATTTCTTTATTTGCTTGTTCAACCCAACCGTCATCAATATACATTGAGTTTGGTCTATTGAACCATTCAAGCATCTTCTTCAGA   |       |       |       |       |       |       |       |       |       |
|                                          | (1)     | -----                                                                                              |       |       |       |       |       |       |       |       |       |
|                                          |         | Section 149                                                                                        |       |       |       |       |       |       |       |       |       |
| T4 NC 000866.4<br>SARS-CoV-2 NC_045512.2 | (14209) | 14209                                                                                              | 14223 | 14234 | 14245 | 14256 | 14267 | 14278 | 14289 | 14304 |       |
|                                          | (14209) | ACTTTCATTTCGTTTTACCTAAAACAATAGTAGGAGCATCGTCAAATTTATGAATTTTGTAGCAAATTTGGATTTAAATTATTCCATAAAGAGGTAAT |       |       |       |       |       |       |       |       |       |
|                                          | (1)     | -----                                                                                              |       |       |       |       |       |       |       |       |       |
|                                          |         | Section 150                                                                                        |       |       |       |       |       |       |       |       |       |
| T4 NC 000866.4<br>SARS-CoV-2 NC_045512.2 | (14305) | 14305                                                                                              | 14311 | 14322 | 14333 | 14344 | 14355 | 14366 | 14377 | 14388 | 14400 |
|                                          | (14305) | AAAATATGATAGCGCACTTTCGTCCGTAATTATAAAATTTATTTCTTTATCTATTTTCCAATCATATATTGAATCATATGAATAGAAAGGATAACGG  |       |       |       |       |       |       |       |       |       |
|                                          | (1)     | -----                                                                                              |       |       |       |       |       |       |       |       |       |
|                                          |         | Section 151                                                                                        |       |       |       |       |       |       |       |       |       |
| T4 NC 000866.4<br>SARS-CoV-2 NC_045512.2 | (14401) | 14401                                                                                              | 14410 | 14421 | 14432 | 14443 | 14454 | 14465 | 14476 | 14496 |       |
|                                          | (14401) | TTTATTATTATAATATGCTTCAGCAACATCAATATAGTTAGATTTAGTAAATGCTTGAATTGCCATAAATGGAGAATTTTGTACAGTTTCAATAAT   |       |       |       |       |       |       |       |       |       |
|                                          | (1)     | -----                                                                                              |       |       |       |       |       |       |       |       |       |
|                                          |         | Section 152                                                                                        |       |       |       |       |       |       |       |       |       |
| T4 NC 000866.4<br>SARS-CoV-2 NC_045512.2 | (14497) | 14497                                                                                              | 14509 | 14520 | 14531 | 14542 | 14553 | 14564 | 14575 | 14592 |       |
|                                          | (14497) | TCCGATCTTTTTAAGTTTTATTTCAACATCTTCTGGAATTGGCATTGAAATAAAATCTTCTACTAGATACATATTATTGTTCATATCTTTTATCAAT  |       |       |       |       |       |       |       |       |       |
|                                          | (1)     | -----                                                                                              |       |       |       |       |       |       |       |       |       |
|                                          |         | Section 153                                                                                        |       |       |       |       |       |       |       |       |       |
| T4 NC 000866.4<br>SARS-CoV-2 NC_045512.2 | (14593) | 14593                                                                                              | 14608 | 14619 | 14630 | 14641 | 14652 | 14663 | 14674 | 14688 |       |
|                                          | (14593) | CATTACTGCTACAGTAATTGGAACATCCTTGACAAACGCCATACTAATACTATTGATAGACATTTCAAACAAAATTGCTTCCATAATTTTCTCAA    |       |       |       |       |       |       |       |       |       |
|                                          | (1)     | -----                                                                                              |       |       |       |       |       |       |       |       |       |
|                                          |         | Section 154                                                                                        |       |       |       |       |       |       |       |       |       |
| T4 NC 000866.4<br>SARS-CoV-2 NC_045512.2 | (14689) | 14689                                                                                              | 14696 | 14707 | 14718 | 14729 | 14740 | 14751 | 14762 | 14773 | 14784 |
|                                          | (14689) | TCACAAGATGTAGATGAACAACTAGAATCACAAGAACTCCACATGAATCACCTGCCCATACATGAACAGGAACATTAGTATCATATGAATCAGAA    |       |       |       |       |       |       |       |       |       |
|                                          | (1)     | -----                                                                                              |       |       |       |       |       |       |       |       |       |

## SARS-CoV-2 &amp; T4.apr

|                                          |                |                                                                                                    |       |       |       |       |       |       |       |
|------------------------------------------|----------------|----------------------------------------------------------------------------------------------------|-------|-------|-------|-------|-------|-------|-------|
|                                          |                | Section 155                                                                                        |       |       |       |       |       |       |       |
| T4 NC 000866.4<br>SARS-CoV-2 NC_045512.2 | (14785)        | 14785                                                                                              | 14795 | 14806 | 14817 | 14828 | 14839 | 14850 | 14861 |
|                                          | (14785)<br>(1) | CTAGACTGTGTATTCTGTGTGTTAGATGATGTAGTAGGTGTTGACCAGCGCCAAGGATTTTTATAATATTCTTGGGCTTCTTCATAAGTCATAGTA   |       |       |       |       |       |       |       |
|                                          |                | Section 156                                                                                        |       |       |       |       |       |       |       |
| T4 NC 000866.4<br>SARS-CoV-2 NC_045512.2 | (14881)        | 14881                                                                                              | 14894 | 14905 | 14916 | 14927 | 14938 | 14949 | 14960 |
|                                          | (14881)<br>(1) | ACTGCTTCTACTGTTCCATCTCCCATATAAACATATTCAACTACAGTTAAAGGAAGGTAGTCATTTGAAATAGGAACTACACCTTCCCCAGGAGTT   |       |       |       |       |       |       |       |
|                                          |                | Section 157                                                                                        |       |       |       |       |       |       |       |
| T4 NC 000866.4<br>SARS-CoV-2 NC_045512.2 | (14977)        | 14977                                                                                              | 14982 | 14993 | 15004 | 15015 | 15026 | 15037 | 15048 |
|                                          | (14977)<br>(1) | GTAGAGAAAAAATCCGTAAAGAACTTTTAAACCAATTAAAGATAAACATTACAAAAAGCCTCTTTTGAATTGACTTGCTTCTCACCATAATCAT     |       |       |       |       |       |       |       |
|                                          |                | Section 158                                                                                        |       |       |       |       |       |       |       |
| T4 NC 000866.4<br>SARS-CoV-2 NC_045512.2 | (15073)        | 15073                                                                                              | 15081 | 15092 | 15103 | 15114 | 15125 | 15136 | 15147 |
|                                          | (15073)<br>(1) | ATCGAATCTCTACATTAAATTCGACAGAACCATCTGCGTACATCATAAATGAATGCACAACAACCTTCTGTAGACCATGGTTGTAGTTCATATTTCT  |       |       |       |       |       |       |       |
|                                          |                | Section 159                                                                                        |       |       |       |       |       |       |       |
| T4 NC 000866.4<br>SARS-CoV-2 NC_045512.2 | (15169)        | 15169                                                                                              | 15180 | 15191 | 15202 | 15213 | 15224 | 15235 | 15246 |
|                                          | (15169)<br>(1) | TCATTACATGTCGTGAAATGATAATATCTAAATCTTCATTTGGTTTAAATCCAACGATTTAACATAGTACTCTCCTCTATAAGATAATTCTATTATA  |       |       |       |       |       |       |       |
|                                          |                | Section 160                                                                                        |       |       |       |       |       |       |       |
| T4 NC 000866.4<br>SARS-CoV-2 NC_045512.2 | (15265)        | 15265                                                                                              | 15279 | 15290 | 15301 | 15312 | 15323 | 15334 | 15345 |
|                                          | (15265)<br>(1) | CCATACTCATTTTGGAAAAGTAAACCATTTAAATGAAAAAAGGACTCCCGAAGGAGTCCTTGAGTTATTAAACCAGTTACTTTCCACAAATCTTCATT |       |       |       |       |       |       |       |
|                                          |                | Section 161                                                                                        |       |       |       |       |       |       |       |
| T4 NC 000866.4<br>SARS-CoV-2 NC_045512.2 | (15361)        | 15361                                                                                              | 15367 | 15378 | 15389 | 15400 | 15411 | 15422 | 15433 |
|                                          | (15361)<br>(1) | TGCAGCAATCCATTCAGTACGTTGATTTTCTTCATATACTGTAGAATATGCTGCTTTTTCTGAAGGGAATGTCTGGTAATGAGCGCCAGAAATTTT   |       |       |       |       |       |       |       |

## SARS-CoV-2 &amp; T4.apr

|                                          |         |                                                                                                    |       |       |       |       |       |       |       |
|------------------------------------------|---------|----------------------------------------------------------------------------------------------------|-------|-------|-------|-------|-------|-------|-------|
|                                          |         | Section 162                                                                                        |       |       |       |       |       |       |       |
| T4 NC 000866.4<br>SARS-CoV-2 NC_045512.2 | (15457) | 15457                                                                                              | 15466 | 15477 | 15488 | 15499 | 15510 | 15521 | 15532 |
|                                          | (15457) | GTGAACGTCAGAATAAAGAGGGAAAGCTACAGAAATTTTCCTTTCCTTCAATTTTCTTATTTCCATCTAATTTCTGCTCAAATGTTTTGATATTAAC  |       |       |       |       |       |       |       |
|                                          |         | Section 163                                                                                        |       |       |       |       |       |       |       |
| T4 NC 000866.4<br>SARS-CoV-2 NC_045512.2 | (15553) | 15553                                                                                              | 15565 | 15576 | 15587 | 15598 | 15609 | 15620 | 15631 |
|                                          | (15553) | ATAACCGCGAGTACTAGCCATGTAATTCTCCTTTATTTAAATTACATGATTATTTATACATCTTCTTTTCTGAATAAGTAAATTAAATTCCTTAAGA  |       |       |       |       |       |       |       |
|                                          |         | Section 164                                                                                        |       |       |       |       |       |       |       |
| T4 NC 000866.4<br>SARS-CoV-2 NC_045512.2 | (15649) | 15649                                                                                              | 15664 | 15675 | 15686 | 15697 | 15708 | 15719 | 15730 |
|                                          | (15649) | GCCGAACCTTGTTACATCATATTTTCCTTTAAGCGCCTTTACAACCGGGCCTGTTGCTGGTTTACCTAAAGAAACCCATAACTCGTGTATTTTCGCTT |       |       |       |       |       |       |       |
|                                          |         | Section 165                                                                                        |       |       |       |       |       |       |       |
| T4 NC 000866.4<br>SARS-CoV-2 NC_045512.2 | (15745) | 15745                                                                                              | 15752 | 15763 | 15774 | 15785 | 15796 | 15807 | 15818 |
|                                          | (15745) | TTAAGTGGTTCATGCCAATGCGGTGCTTTTCTTTGCGCCCTTGAAGTTCCTTCTGAAATCTTTTTATTTCCGCCATTCTGAATAAACTTTTTTCATT  |       |       |       |       |       |       |       |
|                                          |         | Section 166                                                                                        |       |       |       |       |       |       |       |
| T4 NC 000866.4<br>SARS-CoV-2 NC_045512.2 | (15841) | 15841                                                                                              | 15851 | 15862 | 15873 | 15884 | 15895 | 15906 | 15917 |
|                                          | (15841) | ACTTCAGATTGCCGAGCTTTTCTTCTGCCCTATTTTGGGCTATACGTTGTGAATTCTTCATCCGAGTTTTTGTTCAGGATTGTTTAATCTAAGT     |       |       |       |       |       |       |       |
|                                          |         | Section 167                                                                                        |       |       |       |       |       |       |       |
| T4 NC 000866.4<br>SARS-CoV-2 NC_045512.2 | (15937) | 15937                                                                                              | 15950 | 15961 | 15972 | 15983 | 15994 | 16005 | 16016 |
|                                          | (15937) | TTATGTTCTAATCGTTGTTGCTCAGTCCATTTTCTTCCTTCTCCACCCTGACCACCAGGAGAAATATTAATGCAAGTATCTGGGTGTTTACGTTTT   |       |       |       |       |       |       |       |
|                                          |         | Section 168                                                                                        |       |       |       |       |       |       |       |
| T4 NC 000866.4<br>SARS-CoV-2 NC_045512.2 | (16033) | 16033                                                                                              | 16038 | 16049 | 16060 | 16071 | 16082 | 16093 | 16104 |
|                                          | (16033) | AATGCAGATATTAGCTCACGTTCAACTTCATATGATTTTTCTCTAGAACCATGGCATTTTGACCATCGTATTTTATAATTAAATCCATACTTACGA   |       |       |       |       |       |       |       |



## SARS-CoV-2 &amp; T4.apr

|                        |         |                                                                                                    |       |       |       |       |       |       |       |       |       |
|------------------------|---------|----------------------------------------------------------------------------------------------------|-------|-------|-------|-------|-------|-------|-------|-------|-------|
|                        |         | Section 169                                                                                        |       |       |       |       |       |       |       |       |       |
|                        |         | (16129)                                                                                            | 16129 | 16137 | 16148 | 16159 | 16170 | 16181 | 16192 | 16203 | 16224 |
| T4 NC_000866.4         | (16129) | TATATGTTCCATAGTATTTTACCTGAACCCGGATATTTATCATTATATGGATTTACAATAAATGATTCATGTTTCCCAGCGTACCAAAAGACGCCT   |       |       |       |       |       |       |       |       |       |
| SARS-CoV-2 NC_045512.2 | (1)     | -----                                                                                              |       |       |       |       |       |       |       |       |       |
|                        |         | Section 170                                                                                        |       |       |       |       |       |       |       |       |       |
|                        |         | (16225)                                                                                            | 16225 | 16236 | 16247 | 16258 | 16269 | 16280 | 16291 | 16302 | 16320 |
| T4 NC_000866.4         | (16225) | TTCGGCGTCCTAACTTTTACTATATATGTTCTATAAAATTTTTGTTTAATATCCATTATCTTGACGTTCAAATTTATGTTTGTTCTTCAGATAATA   |       |       |       |       |       |       |       |       |       |
| SARS-CoV-2 NC_045512.2 | (1)     | -----                                                                                              |       |       |       |       |       |       |       |       |       |
|                        |         | Section 171                                                                                        |       |       |       |       |       |       |       |       |       |
|                        |         | (16321)                                                                                            | 16321 | 16335 | 16346 | 16357 | 16368 | 16379 | 16390 | 16401 | 16416 |
| T4 NC_000866.4         | (16321) | AAGTTTAAAGATTTCTTCCGCATTCATTCCAAGGCCAACAAACATATTTAATACGAAATGAAATATATCCACAAGCTCAAATTTAATTTTCGAGCTG  |       |       |       |       |       |       |       |       |       |
| SARS-CoV-2 NC_045512.2 | (1)     | -----                                                                                              |       |       |       |       |       |       |       |       |       |
|                        |         | Section 172                                                                                        |       |       |       |       |       |       |       |       |       |
|                        |         | (16417)                                                                                            | 16417 | 16423 | 16434 | 16445 | 16456 | 16467 | 16478 | 16489 | 16512 |
| T4 NC_000866.4         | (16417) | GTCTTCGGGGGACATTTTCATCAATGCGTTTTTCTTGCGCTTCAATATAACGTGCTTTCCATTTTTTCCATACAGCAGAAGCTTCTTTTTTCACCACG |       |       |       |       |       |       |       |       |       |
| SARS-CoV-2 NC_045512.2 | (1)     | -----                                                                                              |       |       |       |       |       |       |       |       |       |
|                        |         | Section 173                                                                                        |       |       |       |       |       |       |       |       |       |
|                        |         | (16513)                                                                                            | 16513 | 16522 | 16533 | 16544 | 16555 | 16566 | 16577 | 16588 | 16608 |
| T4 NC_000866.4         | (16513) | TGACATTTACCAAGAGAAGTCAGAAGTTCGCGGAATTCATCATCAATACAGTCTTTTTGTTTCACGCATCCAAGAAACAACATCACCGGCAGTTTC   |       |       |       |       |       |       |       |       |       |
| SARS-CoV-2 NC_045512.2 | (1)     | -----                                                                                              |       |       |       |       |       |       |       |       |       |
|                        |         | Section 174                                                                                        |       |       |       |       |       |       |       |       |       |
|                        |         | (16609)                                                                                            | 16609 | 16621 | 16632 | 16643 | 16654 | 16665 | 16676 | 16687 | 16704 |
| T4 NC_000866.4         | (16609) | TAATTTATCTGGATGATAGCAGTATTCGCGGACATTAGCCAAACGAATCTGTAAAAACCGCTGCATATCAAGCATAACTTGCAGCGGATCTTTTTTC  |       |       |       |       |       |       |       |       |       |
| SARS-CoV-2 NC_045512.2 | (1)     | -----                                                                                              |       |       |       |       |       |       |       |       |       |
|                        |         | Section 175                                                                                        |       |       |       |       |       |       |       |       |       |
|                        |         | (16705)                                                                                            | 16705 | 16720 | 16731 | 16742 | 16753 | 16764 | 16775 | 16786 | 16800 |
| T4 NC_000866.4         | (16705) | ATCACCGAGAATATCCCAGTATTCATTTTGAGCTTTATCAACACCTTCGATCAAATGAGCACATTCATTAAAGTGAGCCATTAGTTTTCTTTCAA    |       |       |       |       |       |       |       |       |       |
| SARS-CoV-2 NC_045512.2 | (1)     | -----                                                                                              |       |       |       |       |       |       |       |       |       |

## SARS-CoV-2 &amp; T4.apr

|                                          |         |                                                                                                  |       |       |       |       |       |       |       |       |       |
|------------------------------------------|---------|--------------------------------------------------------------------------------------------------|-------|-------|-------|-------|-------|-------|-------|-------|-------|
|                                          |         | Section 176                                                                                      |       |       |       |       |       |       |       |       |       |
| T4 NC 000866.4<br>SARS-CoV-2 NC_045512.2 | (16801) | 16801                                                                                            | 16808 | 16819 | 16830 | 16841 | 16852 | 16863 | 16874 | 16885 | 16896 |
|                                          | (16801) | TTCATTAATAAGTTAAATAATTATATCATTTGAGTATGTAAGCAATTAATTAAAAATATATACTTCATCAGTTCCATTCTTTCTTTGGAATGATA  |       |       |       |       |       |       |       |       |       |
|                                          | (1)     | -----                                                                                            |       |       |       |       |       |       |       |       |       |
|                                          |         | Section 177                                                                                      |       |       |       |       |       |       |       |       |       |
| T4 NC 000866.4<br>SARS-CoV-2 NC_045512.2 | (16897) | 16897                                                                                            | 16907 | 16918 | 16929 | 16940 | 16951 | 16962 | 16973 |       | 16992 |
|                                          | (16897) | TATGTTAAAGACGTATTTTTTATTAAGATGCTTTACATTATATTTTTTAGACCATTCTTTAAGAAGAGTGTTTTCTTTCCGTGGTGTTCTAAAC   |       |       |       |       |       |       |       |       |       |
|                                          | (1)     | -----                                                                                            |       |       |       |       |       |       |       |       |       |
|                                          |         | Section 178                                                                                      |       |       |       |       |       |       |       |       |       |
| T4 NC 000866.4<br>SARS-CoV-2 NC_045512.2 | (16993) | 16993                                                                                            | 17006 | 17017 | 17028 | 17039 | 17050 | 17061 | 17072 |       | 17088 |
|                                          | (16993) | ATTGACTGCCCAAATTTTATTCCTCTATCATTTAAAGAATCTAAAAGATTTAAAGGTCTTTTTCTTCATCTTCTGACCAAATTTATTATAATC    |       |       |       |       |       |       |       |       |       |
|                                          | (1)     | -----                                                                                            |       |       |       |       |       |       |       |       |       |
|                                          |         | Section 179                                                                                      |       |       |       |       |       |       |       |       |       |
| T4 NC 000866.4<br>SARS-CoV-2 NC_045512.2 | (17089) | 17089                                                                                            | 17094 | 17105 | 17116 | 17127 | 17138 | 17149 | 17160 | 17171 | 17184 |
|                                          | (17089) | AGCAACTGTTATGAGATACGGAGGATCTACATATACAAAATCGCCGTCTAAAATTTTAACATCTTTAAATGCAATGAACTAAAGATTATTTTATC  |       |       |       |       |       |       |       |       |       |
|                                          | (1)     | -----                                                                                            |       |       |       |       |       |       |       |       |       |
|                                          |         | Section 180                                                                                      |       |       |       |       |       |       |       |       |       |
| T4 NC 000866.4<br>SARS-CoV-2 NC_045512.2 | (17185) | 17185                                                                                            | 17193 | 17204 | 17215 | 17226 | 17237 | 17248 | 17259 |       | 17280 |
|                                          | (17185) | ACAATTTTGTAAAGTGATTATATTGTTTTTCACTATTTTGTATAGTTCTTTTCCAAACGGAGTAGTAAATTTCTTTATCGTTTATACG         |       |       |       |       |       |       |       |       |       |
|                                          | (1)     | -----                                                                                            |       |       |       |       |       |       |       |       |       |
|                                          |         | Section 181                                                                                      |       |       |       |       |       |       |       |       |       |
| T4 NC 000866.4<br>SARS-CoV-2 NC_045512.2 | (17281) | 17281                                                                                            | 17292 | 17303 | 17314 | 17325 | 17336 | 17347 | 17358 |       | 17376 |
|                                          | (17281) | AATCATATTACTAAATCCGTGAAAATGAAGAACATAAAGTAAAAGAGGATCTCTAGTTTTATTATAATCTTCACGTAATTTCAAAAACCTTTCTTT |       |       |       |       |       |       |       |       |       |
|                                          | (1)     | -----                                                                                            |       |       |       |       |       |       |       |       |       |
|                                          |         | Section 182                                                                                      |       |       |       |       |       |       |       |       |       |
| T4 NC 000866.4<br>SARS-CoV-2 NC_045512.2 | (17377) | 17377                                                                                            | 17391 | 17402 | 17413 | 17424 | 17435 | 17446 | 17457 |       | 17472 |
|                                          | (17377) | TGATGTTTTTGATAGTTTGATTGCTTTATTACTTTTAAAACGTCATCCCATGATACATTAATAAGACGCTTATACATTTCAATAATTGGTTCTTG  |       |       |       |       |       |       |       |       |       |
|                                          | (1)     | -----                                                                                            |       |       |       |       |       |       |       |       |       |

## SARS-CoV-2 &amp; T4.apr

|                                          |         |                                                                                                    |       |       |       |       |       |       |       |       |       |
|------------------------------------------|---------|----------------------------------------------------------------------------------------------------|-------|-------|-------|-------|-------|-------|-------|-------|-------|
|                                          |         | Section 183                                                                                        |       |       |       |       |       |       |       |       |       |
| T4 NC 000866.4<br>SARS-CoV-2 NC_045512.2 | (17473) | 17473                                                                                              | 17479 | 17490 | 17501 | 17512 | 17523 | 17534 | 17545 | 17556 | 17568 |
|                                          | (17473) | AATATCATTGGCCAATACAGGGCCATTAACATTCAAAGACACTGATAAACCTCCACAAAATAAATCCACGAATCTGTTATATTTTGGAAAGTGAGA   |       |       |       |       |       |       |       |       |       |
|                                          | (1)     | -----                                                                                              |       |       |       |       |       |       |       |       |       |
|                                          |         | Section 184                                                                                        |       |       |       |       |       |       |       |       |       |
| T4 NC 000866.4<br>SARS-CoV-2 NC_045512.2 | (17569) | 17569                                                                                              | 17578 | 17589 | 17600 | 17611 | 17622 | 17633 | 17644 |       | 17664 |
|                                          | (17569) | TTTGAGTTCAGGTAATAATGATTGTTTATTACCTGTATACGCGATAGCTCCTAGCATTATATTCTCTCATTTATTGCAGCAAAAATGAATTATACA   |       |       |       |       |       |       |       |       |       |
|                                          | (1)     | -----                                                                                              |       |       |       |       |       |       |       |       |       |
|                                          |         | Section 185                                                                                        |       |       |       |       |       |       |       |       |       |
| T4 NC 000866.4<br>SARS-CoV-2 NC_045512.2 | (17665) | 17665                                                                                              | 17677 | 17688 | 17699 | 17710 | 17721 | 17732 | 17743 |       | 17760 |
|                                          | (17665) | ATTCTTCATCATATGTATTTGATAGTAATACTAACACGTTTTGCGATAAATATTAATTTAAAGGAGGATATATATGGTACAAAAATTAATGGCACT   |       |       |       |       |       |       |       |       |       |
|                                          | (1)     | -----                                                                                              |       |       |       |       |       |       |       |       |       |
|                                          |         | Section 186                                                                                        |       |       |       |       |       |       |       |       |       |
| T4 NC 000866.4<br>SARS-CoV-2 NC_045512.2 | (17761) | 17761                                                                                              | 17776 | 17787 | 17798 | 17809 | 17820 | 17831 | 17842 |       | 17856 |
|                                          | (17761) | TGTTAATGCCATAAAAAGGTAATAAGAAACGTATAGCTTTTACTATTTCTACTATGGTAGGAATTTTACTCTGGAACTTTATTTTATCACCTGTTGC  |       |       |       |       |       |       |       |       |       |
|                                          | (1)     | -----                                                                                              |       |       |       |       |       |       |       |       |       |
|                                          |         | Section 187                                                                                        |       |       |       |       |       |       |       |       |       |
| T4 NC 000866.4<br>SARS-CoV-2 NC_045512.2 | (17857) | 17857                                                                                              | 17864 | 17875 | 17886 | 17897 | 17908 | 17919 | 17930 | 17941 | 17952 |
|                                          | (17857) | AATTGCACATGGTGTTAATATTCAGTAGTTACTCTTGATACATTTCGTAGATTTAGCATTTGCTTTAGTTGGGTTAATTTAAATCTTAGCATATTT   |       |       |       |       |       |       |       |       |       |
|                                          | (1)     | -----                                                                                              |       |       |       |       |       |       |       |       |       |
|                                          |         | Section 188                                                                                        |       |       |       |       |       |       |       |       |       |
| T4 NC 000866.4<br>SARS-CoV-2 NC_045512.2 | (17953) | 17953                                                                                              | 17963 | 17974 | 17985 | 17996 | 18007 | 18018 | 18029 |       | 18048 |
|                                          | (17953) | AGATAGCCGCATTTTAGCCATTAACCCCTGGGCAATATTATTTTTCATATATTCCATAATTTGTTTCAGGGGTTGCACCTTCCTTTCTAATCATATC  |       |       |       |       |       |       |       |       |       |
|                                          | (1)     | -----                                                                                              |       |       |       |       |       |       |       |       |       |
|                                          |         | Section 189                                                                                        |       |       |       |       |       |       |       |       |       |
| T4 NC 000866.4<br>SARS-CoV-2 NC_045512.2 | (18049) | 18049                                                                                              | 18062 | 18073 | 18084 | 18095 | 18106 | 18117 | 18128 |       | 18144 |
|                                          | (18049) | ATTAACATCTTTTGATTTCCAGGGAGATTTATCCCAAAACATAACCCTTTCTCCTGCATCAACTAATTTAGTCATTTCGTTTAATAGTGTTCAGGGTG |       |       |       |       |       |       |       |       |       |
|                                          | (1)     | -----                                                                                              |       |       |       |       |       |       |       |       |       |

## SARS-CoV-2 &amp; T4.apr

|                                          |         |                                                                                                    |       |       |       |       |       |       |       |       |       |
|------------------------------------------|---------|----------------------------------------------------------------------------------------------------|-------|-------|-------|-------|-------|-------|-------|-------|-------|
| Section 190                              |         |                                                                                                    |       |       |       |       |       |       |       |       |       |
| T4 NC 000866.4<br>SARS-CoV-2 NC_045512.2 | (18145) | 18145                                                                                              | 18150 | 18161 | 18172 | 18183 | 18194 | 18205 | 18216 | 18227 | 18240 |
|                                          | (18145) | ACGAGGTTTCATTATCTAAGACCCACACACGTCTATCTTTAAATGGAACAACCTTCTAGGTCTAATTGACCGCCCGTAATAGCTATACCATTTTCAAT |       |       |       |       |       |       |       |       |       |
|                                          | (1)     | -----                                                                                              |       |       |       |       |       |       |       |       |       |
| Section 191                              |         |                                                                                                    |       |       |       |       |       |       |       |       |       |
| T4 NC 000866.4<br>SARS-CoV-2 NC_045512.2 | (18241) | 18241                                                                                              | 18249 | 18260 | 18271 | 18282 | 18293 | 18304 | 18315 |       | 18336 |
|                                          | (18241) | AAAAAGTGAATCTATAGGTCCTTCTAGAACATATACATCACCATCTTTAACTCGTTCGACTCCATAGATTTTTGTTGCCTCAGGATAAGCTTCGAT   |       |       |       |       |       |       |       |       |       |
|                                          | (1)     | -----                                                                                              |       |       |       |       |       |       |       |       |       |
| Section 192                              |         |                                                                                                    |       |       |       |       |       |       |       |       |       |
| T4 NC 000866.4<br>SARS-CoV-2 NC_045512.2 | (18337) | 18337                                                                                              | 18348 | 18359 | 18370 | 18381 | 18392 | 18403 | 18414 |       | 18432 |
|                                          | (18337) | GGTGATATATTTTTGAGGAGCATCTTTCTTTAATGCACGTCCTTGAAAAGACTCAGCTTTTCCATTAGCATTATAAATTGGAATAACAAGACGAGG   |       |       |       |       |       |       |       |       |       |
|                                          | (1)     | -----                                                                                              |       |       |       |       |       |       |       |       |       |
| Section 193                              |         |                                                                                                    |       |       |       |       |       |       |       |       |       |
| T4 NC 000866.4<br>SARS-CoV-2 NC_045512.2 | (18433) | 18433                                                                                              |       | 18447 | 18458 | 18469 | 18480 | 18491 | 18502 | 18513 | 18528 |
|                                          | (18433) | CTCAGAAATTTCTTTTTGTATGTTCCCGGTGCTATGCTATTAATACTAATTTAGGCCATTTCGGTTGTAAACCAAAGATATTTCCATTTATCCTTTGG |       |       |       |       |       |       |       |       |       |
|                                          | (1)     | -----                                                                                              |       |       |       |       |       |       |       |       |       |
| Section 194                              |         |                                                                                                    |       |       |       |       |       |       |       |       |       |
| T4 NC 000866.4<br>SARS-CoV-2 NC_045512.2 | (18529) | 18529                                                                                              | 18535 | 18546 | 18557 | 18568 | 18579 | 18590 | 18601 | 18612 | 18624 |
|                                          | (18529) | AATACAACGAGCTTTTACGTATTTTATAATTGGATGGTCTTCCGCCAGTTTATCTAATCTAACACATGACGGAAGAGATTTAATTATTTTCTTCTC   |       |       |       |       |       |       |       |       |       |
|                                          | (1)     | -----                                                                                              |       |       |       |       |       |       |       |       |       |
| Section 195                              |         |                                                                                                    |       |       |       |       |       |       |       |       |       |
| T4 NC 000866.4<br>SARS-CoV-2 NC_045512.2 | (18625) | 18625                                                                                              | 18634 | 18645 | 18656 | 18667 | 18678 | 18689 | 18700 |       | 18720 |
|                                          | (18625) | GGGTTGTTTAGGAAGTTCTTTAGGTTTTTCTATTGGACGACTTTTACCTTTTTCTTTTCTTATTTCAAAGATATACTCACGATATAAATCGGGTTC   |       |       |       |       |       |       |       |       |       |
|                                          | (1)     | -----                                                                                              |       |       |       |       |       |       |       |       |       |
| Section 196                              |         |                                                                                                    |       |       |       |       |       |       |       |       |       |
| T4 NC 000866.4<br>SARS-CoV-2 NC_045512.2 | (18721) | 18721                                                                                              |       | 18733 | 18744 | 18755 | 18766 | 18777 | 18788 | 18799 | 18816 |
|                                          | (18721) | AAACTCCTTTAAATATATTCCGATTGGTGCATGATAGTTACAGTTATAACAATGAATATTTCTTCATTATTATCACCATAATACCATCCACGGGC    |       |       |       |       |       |       |       |       |       |
|                                          | (1)     | -----                                                                                              |       |       |       |       |       |       |       |       |       |

## SARS-CoV-2 &amp; T4.apr

|                                          |         |                                                                                                   |       |       |       |       |       |       |       |             |
|------------------------------------------|---------|---------------------------------------------------------------------------------------------------|-------|-------|-------|-------|-------|-------|-------|-------------|
|                                          |         |                                                                                                   |       |       |       |       |       |       |       | Section 197 |
| T4 NC 000866.4<br>SARS-CoV-2 NC_045512.2 | (18817) | 18817                                                                                             | 18832 | 18843 | 18854 | 18865 | 18876 | 18887 | 18898 | 18912       |
|                                          | (18817) | TTTATTCTGGTCGGTTTTTGAATCTCCACAAACAGGGCATCTAAACCGTAATTTAAAAGTTGAACATTATTTACTTGTGTGAATTTAGGTAAATG   |       |       |       |       |       |       |       |             |
|                                          | (1)     | -----                                                                                             |       |       |       |       |       |       |       |             |
|                                          |         |                                                                                                   |       |       |       |       |       |       |       | Section 198 |
| T4 NC 000866.4<br>SARS-CoV-2 NC_045512.2 | (18913) | 18913                                                                                             | 18920 | 18931 | 18942 | 18953 | 18964 | 18975 | 18986 | 18997 19008 |
|                                          | (18913) | AGCTAATGCACGGTATGCAAACTCATTATCAATCCAAGGTATTGATGACATTTTTACTCTTCTTTTCTTTAGATTCTCTTTTTCTTTTTAGGA     |       |       |       |       |       |       |       |             |
|                                          | (1)     | -----                                                                                             |       |       |       |       |       |       |       |             |
|                                          |         |                                                                                                   |       |       |       |       |       |       |       | Section 199 |
| T4 NC 000866.4<br>SARS-CoV-2 NC_045512.2 | (19009) | 19009                                                                                             | 19019 | 19030 | 19041 | 19052 | 19063 | 19074 | 19085 | 19104       |
|                                          | (19009) | ATCTGTTTCAGGACCTTTATTTACTACAGCGCCTGATGTTGTTCCAATAGAGATATTTTCAGGATTACCACCTGAATCTCCAGCGACCATATCTTCT |       |       |       |       |       |       |       |             |
|                                          | (1)     | -----                                                                                             |       |       |       |       |       |       |       |             |
|                                          |         |                                                                                                   |       |       |       |       |       |       |       | Section 200 |
| T4 NC 000866.4<br>SARS-CoV-2 NC_045512.2 | (19105) | 19105                                                                                             | 19118 | 19129 | 19140 | 19151 | 19162 | 19173 | 19184 | 19200       |
|                                          | (19105) | TTGATAAATTCTTTAAATGTTTTCATATTAACCTCTATTCATAAAAGCATTAAAAATTTGGTCATCAATAGAAACATTTACTTTAGGCTGTTTTTC  |       |       |       |       |       |       |       |             |
|                                          | (1)     | -----                                                                                             |       |       |       |       |       |       |       |             |
|                                          |         |                                                                                                   |       |       |       |       |       |       |       | Section 201 |
| T4 NC 000866.4<br>SARS-CoV-2 NC_045512.2 | (19201) | 19201                                                                                             | 19206 | 19217 | 19228 | 19239 | 19250 | 19261 | 19272 | 19283 19296 |
|                                          | (19201) | AGATGGCAATTCATATCCACATATTACAATTTTATGATCAATATCAAAATACACAGAAGCAATATGATTAATGATATTTTCAGTAAAGTCTAAATC  |       |       |       |       |       |       |       |             |
|                                          | (1)     | -----                                                                                             |       |       |       |       |       |       |       |             |
|                                          |         |                                                                                                   |       |       |       |       |       |       |       | Section 202 |
| T4 NC 000866.4<br>SARS-CoV-2 NC_045512.2 | (19297) | 19297                                                                                             | 19305 | 19316 | 19327 | 19338 | 19349 | 19360 | 19371 | 19392       |
|                                          | (19297) | AACATCAATATCTTTTTGACCAAAGCCCAAAGGATAAATAATGCGAGTAATTCGATTATCTTTAACAAAGATTCCACCGACATACTCTGTGCTGCG  |       |       |       |       |       |       |       |             |
|                                          | (1)     | -----                                                                                             |       |       |       |       |       |       |       |             |
|                                          |         |                                                                                                   |       |       |       |       |       |       |       | Section 203 |
| T4 NC 000866.4<br>SARS-CoV-2 NC_045512.2 | (19393) | 19393                                                                                             | 19404 | 19415 | 19426 | 19437 | 19448 | 19459 | 19470 | 19488       |
|                                          | (19393) | TTTAAAGTCTACACGCCGACGAAATGAAAAATATTCAGGCTCTTTATGAGCTCGGCTCATAGGACACAACGAATAACTAGAATAAGAGATGTCAAA  |       |       |       |       |       |       |       |             |
|                                          | (1)     | -----                                                                                             |       |       |       |       |       |       |       |             |

## SARS-CoV-2 &amp; T4.apr

|                                          |         |                                                                                                    |       |       |       |       |       |       |       |       |       |
|------------------------------------------|---------|----------------------------------------------------------------------------------------------------|-------|-------|-------|-------|-------|-------|-------|-------|-------|
|                                          |         | Section 204                                                                                        |       |       |       |       |       |       |       |       |       |
| T4 NC 000866.4<br>SARS-CoV-2 NC_045512.2 | (19489) | 19489                                                                                              | 19503 | 19514 | 19525 | 19536 | 19547 | 19558 | 19569 | 19584 |       |
|                                          | (19489) | TCCTACGCCTTCAATATGAACTAAATTGTCATGATTAAACCAATTATAATCATATGCCAAGTCCATTAGATTGTCATATGTGAAAAGCACCGGATT   |       |       |       |       |       |       |       |       |       |
|                                          | (1)     | -----                                                                                              |       |       |       |       |       |       |       |       |       |
|                                          |         | Section 205                                                                                        |       |       |       |       |       |       |       |       |       |
| T4 NC 000866.4<br>SARS-CoV-2 NC_045512.2 | (19585) | 19585                                                                                              | 19591 | 19602 | 19613 | 19624 | 19635 | 19646 | 19657 | 19668 | 19680 |
|                                          | (19585) | AACATCATTGGTCACAAGCATATAATTAGCAACTGCTATAATTTTCATTATTTTAAACGAATACAAACCGTGATTGATGCGAATGGCCTGGACCTGC  |       |       |       |       |       |       |       |       |       |
|                                          | (1)     | -----                                                                                              |       |       |       |       |       |       |       |       |       |
|                                          |         | Section 206                                                                                        |       |       |       |       |       |       |       |       |       |
| T4 NC 000866.4<br>SARS-CoV-2 NC_045512.2 | (19681) | 19681                                                                                              | 19690 | 19701 | 19712 | 19723 | 19734 | 19745 | 19756 | 19776 |       |
|                                          | (19681) | GTTTTACAGATTAATGATATAACACTGGGCACCTTTATATTTGTACGTGTCCTTTACACTTGTGCATTTGATAAAGCATTATTACCTACCACTTCA   |       |       |       |       |       |       |       |       |       |
|                                          | (1)     | -----                                                                                              |       |       |       |       |       |       |       |       |       |
|                                          |         | Section 207                                                                                        |       |       |       |       |       |       |       |       |       |
| T4 NC 000866.4<br>SARS-CoV-2 NC_045512.2 | (19777) | 19777                                                                                              | 19789 | 19800 | 19811 | 19822 | 19833 | 19844 | 19855 | 19872 |       |
|                                          | (19777) | GCGATGATATTTTTGTTATTAAAGTTTTTATCGCAATACAGAACATAAATTATACTGCATTACACCACCAGACTTAAGCTGTTTTTGCACCTCAGCT  |       |       |       |       |       |       |       |       |       |
|                                          | (1)     | -----                                                                                              |       |       |       |       |       |       |       |       |       |
|                                          |         | Section 208                                                                                        |       |       |       |       |       |       |       |       |       |
| T4 NC 000866.4<br>SARS-CoV-2 NC_045512.2 | (19873) | 19873                                                                                              | 19888 | 19899 | 19910 | 19921 | 19932 | 19943 | 19954 | 19968 |       |
|                                          | (19873) | TTCATTTTCAGGACGATCACGCTTAACGATATTCATAATATCTGCTTCAATTTGAGTTTCAACCTCAGTCTGATCCGCAGTCATAGACCATTTCGCAC |       |       |       |       |       |       |       |       |       |
|                                          | (1)     | -----                                                                                              |       |       |       |       |       |       |       |       |       |
|                                          |         | Section 209                                                                                        |       |       |       |       |       |       |       |       |       |
| T4 NC 000866.4<br>SARS-CoV-2 NC_045512.2 | (19969) | 19969                                                                                              | 19976 | 19987 | 19998 | 20009 | 20020 | 20031 | 20042 | 20053 | 20064 |
|                                          | (19969) | AAATCTTTATCATAACCTGCCATAGCAGGCTGAGCAGCACAGAAGCTAAAGCAAAAATTGTAGCAAAGATGAATTTTTTCATGATAATCTCCTCA    |       |       |       |       |       |       |       |       |       |
|                                          | (1)     | -----                                                                                              |       |       |       |       |       |       |       |       |       |
|                                          |         | Section 210                                                                                        |       |       |       |       |       |       |       |       |       |
| T4 NC 000866.4<br>SARS-CoV-2 NC_045512.2 | (20065) | 20065                                                                                              | 20075 | 20086 | 20097 | 20108 | 20119 | 20130 | 20141 | 20160 |       |
|                                          | (20065) | GTAGTTTATGTTTATATAGTATCTCAATTTCCAACAAAAGTAAACAGTTATTTTAAAAATTTCTGCGTAATCACATGTTACAAACTGTTTCTCTAAC  |       |       |       |       |       |       |       |       |       |
|                                          | (1)     | -----                                                                                              |       |       |       |       |       |       |       |       |       |

## SARS-CoV-2 &amp; T4.apr

|                                          |         |                                                                                                    |                       |                       |                       |                       |                       |                       |                       |                       |                       |
|------------------------------------------|---------|----------------------------------------------------------------------------------------------------|-----------------------|-----------------------|-----------------------|-----------------------|-----------------------|-----------------------|-----------------------|-----------------------|-----------------------|
|                                          |         |                                                                                                    |                       |                       |                       |                       |                       |                       |                       | Section 211           |                       |
| T4 NC 000866.4<br>SARS-CoV-2 NC_045512.2 | (20161) | <a href="#">20161</a>                                                                              | <a href="#">20174</a> | <a href="#">20185</a> | <a href="#">20196</a> | <a href="#">20207</a> | <a href="#">20218</a> | <a href="#">20229</a> | <a href="#">20240</a> | <a href="#">20256</a> |                       |
|                                          | (20161) | TTGACGATTTTACGAAAGTATCTTTTGCATTGGCGAATCTGCCTCTTCGTAGGGCGAACAGCAAACCTTAATAAATTCCACTCGACCAAATGGAGGG  |                       |                       |                       |                       |                       |                       |                       |                       |                       |
|                                          | (1)     | -----                                                                                              |                       |                       |                       |                       |                       |                       |                       |                       |                       |
|                                          |         |                                                                                                    |                       |                       |                       |                       |                       |                       |                       | Section 212           |                       |
| T4 NC 000866.4<br>SARS-CoV-2 NC_045512.2 | (20257) | <a href="#">20257</a>                                                                              | <a href="#">20262</a> | <a href="#">20273</a> | <a href="#">20284</a> | <a href="#">20295</a> | <a href="#">20306</a> | <a href="#">20317</a> | <a href="#">20328</a> | <a href="#">20339</a> | <a href="#">20352</a> |
|                                          | (20257) | CTTTCTTCTGCTGGAATATCTAACACCAATTCCCACGTATCTGCAATAAGTGCTTTGAATTGCGTATTTTTCTGACGTTATACGGAGTAGGTTTA    |                       |                       |                       |                       |                       |                       |                       |                       |                       |
|                                          | (1)     | -----                                                                                              |                       |                       |                       |                       |                       |                       |                       |                       |                       |
|                                          |         |                                                                                                    |                       |                       |                       |                       |                       |                       |                       | Section 213           |                       |
| T4 NC 000866.4<br>SARS-CoV-2 NC_045512.2 | (20353) | <a href="#">20353</a>                                                                              | <a href="#">20361</a> | <a href="#">20372</a> | <a href="#">20383</a> | <a href="#">20394</a> | <a href="#">20405</a> | <a href="#">20416</a> | <a href="#">20427</a> | <a href="#">20448</a> |                       |
|                                          | (20353) | AATAAAACAATATGCATATTATCCTCGGCAATCCACTTCACATACTTTCTTGTCAATGAAAGCTTTAACTAATGCTTTATTAACTTCAGCATA      |                       |                       |                       |                       |                       |                       |                       |                       |                       |
|                                          | (1)     | -----                                                                                              |                       |                       |                       |                       |                       |                       |                       |                       |                       |
|                                          |         |                                                                                                    |                       |                       |                       |                       |                       |                       |                       | Section 214           |                       |
| T4 NC 000866.4<br>SARS-CoV-2 NC_045512.2 | (20449) | <a href="#">20449</a>                                                                              | <a href="#">20460</a> | <a href="#">20471</a> | <a href="#">20482</a> | <a href="#">20493</a> | <a href="#">20504</a> | <a href="#">20515</a> | <a href="#">20526</a> | <a href="#">20544</a> |                       |
|                                          | (20449) | TTGAGTAGTAGCCCATTTGAACGTCATCTTTTCATCATTGTGATTTCTTTAGTAAACATGCTTTCATTCTTAAACCACCCATAAAACTACCTTTAC   |                       |                       |                       |                       |                       |                       |                       |                       |                       |
|                                          | (1)     | -----                                                                                              |                       |                       |                       |                       |                       |                       |                       |                       |                       |
|                                          |         |                                                                                                    |                       |                       |                       |                       |                       |                       |                       | Section 215           |                       |
| T4 NC 000866.4<br>SARS-CoV-2 NC_045512.2 | (20545) | <a href="#">20545</a>                                                                              | <a href="#">20559</a> | <a href="#">20570</a> | <a href="#">20581</a> | <a href="#">20592</a> | <a href="#">20603</a> | <a href="#">20614</a> | <a href="#">20625</a> | <a href="#">20640</a> |                       |
|                                          | (20545) | CAATTCCATAACAATCTCCTCATTTAACCGACAAGACTACTATACCATAGTCTTGTCAGCTTGTAACCTAAAATTTAATTCATTTCGCCAAAGCAT   |                       |                       |                       |                       |                       |                       |                       |                       |                       |
|                                          | (1)     | -----                                                                                              |                       |                       |                       |                       |                       |                       |                       |                       |                       |
|                                          |         |                                                                                                    |                       |                       |                       |                       |                       |                       |                       | Section 216           |                       |
| T4 NC 000866.4<br>SARS-CoV-2 NC_045512.2 | (20641) | <a href="#">20641</a>                                                                              | <a href="#">20647</a> | <a href="#">20658</a> | <a href="#">20669</a> | <a href="#">20680</a> | <a href="#">20691</a> | <a href="#">20702</a> | <a href="#">20713</a> | <a href="#">20724</a> | <a href="#">20736</a> |
|                                          | (20641) | CTAACTGAGCTCGAGTCGATTCAATTTCTTTTGATAGCGATTCTGCTCAGCCTGAATCTGTTGTGAACCTGCTACTTCGTTCACTTCAGTTGGAGTAG |                       |                       |                       |                       |                       |                       |                       |                       |                       |
|                                          | (1)     | -----                                                                                              |                       |                       |                       |                       |                       |                       |                       |                       |                       |
|                                          |         |                                                                                                    |                       |                       |                       |                       |                       |                       |                       | Section 217           |                       |
| T4 NC 000866.4<br>SARS-CoV-2 NC_045512.2 | (20737) | <a href="#">20737</a>                                                                              | <a href="#">20746</a> | <a href="#">20757</a> | <a href="#">20768</a> | <a href="#">20779</a> | <a href="#">20790</a> | <a href="#">20801</a> | <a href="#">20812</a> | <a href="#">20832</a> |                       |
|                                          | (20737) | AATCTTGTTCAATTTCTACCCATTTTGTGATTTCTTTTGAACACCCATCAAAAACCTTATTCCACTTATTCTTATCACCATATCGTGATTTGATTT   |                       |                       |                       |                       |                       |                       |                       |                       |                       |
|                                          | (1)     | -----                                                                                              |                       |                       |                       |                       |                       |                       |                       |                       |                       |

## SARS-CoV-2 &amp; T4.apr

|                                          |         |                                                                                                    |                       |                       |                       |                       |                       |                       |                       |                       |
|------------------------------------------|---------|----------------------------------------------------------------------------------------------------|-----------------------|-----------------------|-----------------------|-----------------------|-----------------------|-----------------------|-----------------------|-----------------------|
|                                          |         |                                                                                                    |                       |                       |                       |                       |                       |                       |                       | Section 218           |
| T4 NC 000866.4<br>SARS-CoV-2 NC_045512.2 | (20833) | <a href="#">20833</a>                                                                              | <a href="#">20845</a> | <a href="#">20856</a> | <a href="#">20867</a> | <a href="#">20878</a> | <a href="#">20889</a> | <a href="#">20900</a> | <a href="#">20911</a> | <a href="#">20928</a> |
|                                          | (20833) | GCTTAATGAGTTGTTGTTTCAGCAGCTGCTAGCTCCTCGGTTTCAATGACCGCAAGCATAAAAATCGGCTGTTGCTGGAAGACCGGCAGATTCTGCAA |                       |                       |                       |                       |                       |                       |                       |                       |
|                                          | (1)     | -----                                                                                              |                       |                       |                       |                       |                       |                       |                       |                       |
|                                          |         |                                                                                                    |                       |                       |                       |                       |                       |                       |                       | Section 219           |
| T4 NC 000866.4<br>SARS-CoV-2 NC_045512.2 | (20929) | <a href="#">20929</a>                                                                              | <a href="#">20944</a> | <a href="#">20955</a> | <a href="#">20966</a> | <a href="#">20977</a> | <a href="#">20988</a> | <a href="#">20999</a> | <a href="#">21010</a> | <a href="#">21024</a> |
|                                          | (20929) | TATCGCTCATGTTAACATCGGAAGAGTCCCAAGCTTGTTTACCAACCTGTGCTGCAGTCCAAAGAACAGTTTCGGTTTCAACAGCCAGAGCACGTA   |                       |                       |                       |                       |                       |                       |                       |                       |
|                                          | (1)     | -----                                                                                              |                       |                       |                       |                       |                       |                       |                       |                       |
|                                          |         |                                                                                                    |                       |                       |                       |                       |                       |                       |                       | Section 220           |
| T4 NC 000866.4<br>SARS-CoV-2 NC_045512.2 | (21025) | <a href="#">21025</a>                                                                              | <a href="#">21032</a> | <a href="#">21043</a> | <a href="#">21054</a> | <a href="#">21065</a> | <a href="#">21076</a> | <a href="#">21087</a> | <a href="#">21098</a> | <a href="#">21109</a> |
|                                          | (21025) | ATTCTCTGCAATAGCTTTAACAGTTGTGTAACCTATTTTCTGAATAAACTCTAATGCGGCAAGATTTACAAATACCTAGATAGTCGACAATAATGA   |                       |                       |                       |                       |                       |                       |                       |                       |
|                                          | (1)     | -----                                                                                              |                       |                       |                       |                       |                       |                       |                       |                       |
|                                          |         |                                                                                                    |                       |                       |                       |                       |                       |                       |                       | Section 221           |
| T4 NC 000866.4<br>SARS-CoV-2 NC_045512.2 | (21121) | <a href="#">21121</a>                                                                              | <a href="#">21131</a> | <a href="#">21142</a> | <a href="#">21153</a> | <a href="#">21164</a> | <a href="#">21175</a> | <a href="#">21186</a> | <a href="#">21197</a> | <a href="#">21216</a> |
|                                          | (21121) | TTGTTGGAACAAAATTCTTCTTGAGCTTCAATTCGTTTAAAAGTGATCGAAATGTATTAGCGTCTGCTCCACCAGTAGGATACTGTTTAAACGATTA  |                       |                       |                       |                       |                       |                       |                       |                       |
|                                          | (1)     | -----                                                                                              |                       |                       |                       |                       |                       |                       |                       |                       |
|                                          |         |                                                                                                    |                       |                       |                       |                       |                       |                       |                       | Section 222           |
| T4 NC 000866.4<br>SARS-CoV-2 NC_045512.2 | (21217) | <a href="#">21217</a>                                                                              | <a href="#">21230</a> | <a href="#">21241</a> | <a href="#">21252</a> | <a href="#">21263</a> | <a href="#">21274</a> | <a href="#">21285</a> | <a href="#">21296</a> | <a href="#">21312</a> |
|                                          | (21217) | AACGACCAAGAGTAGATTTCTCACGCCATTTTCCATTTTTCCTTTATACTCAGCGTAAGAAATATGCCCATCATCAATGTCATCAAGAGAAACAT    |                       |                       |                       |                       |                       |                       |                       |                       |
|                                          | (1)     | -----                                                                                              |                       |                       |                       |                       |                       |                       |                       |                       |
|                                          |         |                                                                                                    |                       |                       |                       |                       |                       |                       |                       | Section 223           |
| T4 NC 000866.4<br>SARS-CoV-2 NC_045512.2 | (21313) | <a href="#">21313</a>                                                                              | <a href="#">21318</a> | <a href="#">21329</a> | <a href="#">21340</a> | <a href="#">21351</a> | <a href="#">21362</a> | <a href="#">21373</a> | <a href="#">21384</a> | <a href="#">21395</a> |
|                                          | (21313) | CAAGCATATTAGCGTCAATACGTTTAGCACAGACTTCTTCTGCCATTTCCATGGAAATGTAAAGAACATTATGTCCGAGCTGTAAATAATCTGCCG   |                       |                       |                       |                       |                       |                       |                       |                       |
|                                          | (1)     | -----                                                                                              |                       |                       |                       |                       |                       |                       |                       |                       |
|                                          |         |                                                                                                    |                       |                       |                       |                       |                       |                       |                       | Section 224           |
| T4 NC 000866.4<br>SARS-CoV-2 NC_045512.2 | (21409) | <a href="#">21409</a>                                                                              | <a href="#">21417</a> | <a href="#">21428</a> | <a href="#">21439</a> | <a href="#">21450</a> | <a href="#">21461</a> | <a href="#">21472</a> | <a href="#">21483</a> | <a href="#">21504</a> |
|                                          | (21409) | CTAATGAACACAATCCTAATGATTTACCAACGTTAACGCCAGCCATTAAACGTTTCAGTGTTCCAGTTTCAGCTCCGCCTTTTCGTAATTTTGTTC   |                       |                       |                       |                       |                       |                       |                       |                       |
|                                          | (1)     | -----                                                                                              |                       |                       |                       |                       |                       |                       |                       |                       |



## SARS-CoV-2 &amp; T4.apr

|                                          |                |                                                                                                   |                       |                       |                       |                       |                       |                       |                       |
|------------------------------------------|----------------|---------------------------------------------------------------------------------------------------|-----------------------|-----------------------|-----------------------|-----------------------|-----------------------|-----------------------|-----------------------|
|                                          |                | Section 225                                                                                       |                       |                       |                       |                       |                       |                       |                       |
| T4 NC 000866.4<br>SARS-CoV-2 NC_045512.2 | (21505)        | <a href="#">21505</a>                                                                             | <a href="#">21516</a> | <a href="#">21527</a> | <a href="#">21538</a> | <a href="#">21549</a> | <a href="#">21560</a> | <a href="#">21571</a> | <a href="#">21582</a> |
|                                          | (21505)<br>(1) | GAATTCTGAGTTTAAATGGAACCTTACGAGCTTTATTCATATAAGATAGCCAACGTGCTTCGTAGTCATCCATCCAATCATGACCAACGTAACAT   |                       |                       |                       |                       |                       |                       |                       |
|                                          |                | Section 226                                                                                       |                       |                       |                       |                       |                       |                       |                       |
| T4 NC 000866.4<br>SARS-CoV-2 NC_045512.2 | (21601)        | <a href="#">21601</a>                                                                             | <a href="#">21615</a> | <a href="#">21626</a> | <a href="#">21637</a> | <a href="#">21648</a> | <a href="#">21659</a> | <a href="#">21670</a> | <a href="#">21681</a> |
|                                          | (21601)<br>(1) | CAAATGAAATTGATAATGCCTGGCGCATGATGTCAGGAATAGCACCAACATCCGGCATTCTTATTTCTGTTTTTCCGGAGGAAGCTCAGCATTAG   |                       |                       |                       |                       |                       |                       |                       |
|                                          |                | Section 227                                                                                       |                       |                       |                       |                       |                       |                       |                       |
| T4 NC 000866.4<br>SARS-CoV-2 NC_045512.2 | (21697)        | <a href="#">21697</a>                                                                             | <a href="#">21703</a> | <a href="#">21714</a> | <a href="#">21725</a> | <a href="#">21736</a> | <a href="#">21747</a> | <a href="#">21758</a> | <a href="#">21769</a> |
|                                          | (21697)<br>(1) | TTTGAATTTTCGATTATTTTAGACGTAGCATTAAACATCGCCCTTTGCTGAACATATTTTCTGTTTCTTTTACTAACCAGCTGTGGTCTTCCGGAG  |                       |                       |                       |                       |                       |                       |                       |
|                                          |                | Section 228                                                                                       |                       |                       |                       |                       |                       |                       |                       |
| T4 NC 000866.4<br>SARS-CoV-2 NC_045512.2 | (21793)        | <a href="#">21793</a>                                                                             | <a href="#">21802</a> | <a href="#">21813</a> | <a href="#">21824</a> | <a href="#">21835</a> | <a href="#">21846</a> | <a href="#">21857</a> | <a href="#">21868</a> |
|                                          | (21793)<br>(1) | AATCAGCCAGTTTTGAAATAAGTGTTTTTACACCAGAATATTCTGTTTCAGTAAATGAACATATTTTCTAATGCAACATTTAACGCATTAATAGATG |                       |                       |                       |                       |                       |                       |                       |
|                                          |                | Section 229                                                                                       |                       |                       |                       |                       |                       |                       |                       |
| T4 NC 000866.4<br>SARS-CoV-2 NC_045512.2 | (21889)        | <a href="#">21889</a>                                                                             | <a href="#">21901</a> | <a href="#">21912</a> | <a href="#">21923</a> | <a href="#">21934</a> | <a href="#">21945</a> | <a href="#">21956</a> | <a href="#">21967</a> |
|                                          | (21889)<br>(1) | GAACGCTATGGTACTCATTAACATGAGATTTAATTAATTTGAATGTATTTTCTAGCTGGACCACTTTCAAATATTCTGAATCCATATATGGCCAAA  |                       |                       |                       |                       |                       |                       |                       |
|                                          |                | Section 230                                                                                       |                       |                       |                       |                       |                       |                       |                       |
| T4 NC 000866.4<br>SARS-CoV-2 NC_045512.2 | (21985)        | <a href="#">21985</a>                                                                             | <a href="#">22000</a> | <a href="#">22011</a> | <a href="#">22022</a> | <a href="#">22033</a> | <a href="#">22044</a> | <a href="#">22055</a> | <a href="#">22066</a> |
|                                          | (21985)<br>(1) | CTTTTGAAAAATAAGCTTGATCAAATATGAGATGAGAAAGAATAATTTCTACCACACTTACTCCTTAAAGAATTTAAATTTTTCTTTGACCTTT    |                       |                       |                       |                       |                       |                       |                       |
|                                          |                | Section 231                                                                                       |                       |                       |                       |                       |                       |                       |                       |
| T4 NC 000866.4<br>SARS-CoV-2 NC_045512.2 | (22081)        | <a href="#">22081</a>                                                                             | <a href="#">22088</a> | <a href="#">22099</a> | <a href="#">22110</a> | <a href="#">22121</a> | <a href="#">22132</a> | <a href="#">22143</a> | <a href="#">22154</a> |
|                                          | (22081)<br>(1) | TATTAAATGCATCTTGACGTTGCATTGTAATACATTTTTCTACATGAGGAGCTAACTCAGCTTTTCTTTCTTGGTCAAGAACAGCAAAGTCCATTA  |                       |                       |                       |                       |                       |                       |                       |

## SARS-CoV-2 &amp; T4.apr

|                                          |                |                                                                                                    |                       |                       |                       |                       |                       |                       |                       |                       |                       |
|------------------------------------------|----------------|----------------------------------------------------------------------------------------------------|-----------------------|-----------------------|-----------------------|-----------------------|-----------------------|-----------------------|-----------------------|-----------------------|-----------------------|
|                                          |                | Section 232                                                                                        |                       |                       |                       |                       |                       |                       |                       |                       |                       |
| T4 NC 000866.4<br>SARS-CoV-2 NC_045512.2 | (22177)        | <a href="#">22177</a>                                                                              | <a href="#">22187</a> | <a href="#">22198</a> | <a href="#">22209</a> | <a href="#">22220</a> | <a href="#">22231</a> | <a href="#">22242</a> | <a href="#">22253</a> | <a href="#">22272</a> |                       |
|                                          | (22177)<br>(1) | CAACCTTTCCATCAACCCAATCCAGTTTAGTTACATACACTATATGCGTAGAACCATCTTCTAGTTTAATGACAATCTCCTGGATAACATTTTCCA   |                       |                       |                       |                       |                       |                       |                       |                       |                       |
|                                          |                | Section 233                                                                                        |                       |                       |                       |                       |                       |                       |                       |                       |                       |
| T4 NC 000866.4<br>SARS-CoV-2 NC_045512.2 | (22273)        | <a href="#">22273</a>                                                                              | <a href="#">22286</a> | <a href="#">22297</a> | <a href="#">22308</a> | <a href="#">22319</a> | <a href="#">22330</a> | <a href="#">22341</a> | <a href="#">22352</a> | <a href="#">22368</a> |                       |
|                                          | (22273)<br>(1) | TAGCAGATTTAATTATCTTAAGAGACTCATTAAAAAGACGTTCTTTTCTTTCTTCTTCCCCCTCCGAAGAGGGGGATTTCATCGATAATTTCTAGAT  |                       |                       |                       |                       |                       |                       |                       |                       |                       |
|                                          |                | Section 234                                                                                        |                       |                       |                       |                       |                       |                       |                       |                       |                       |
| T4 NC 000866.4<br>SARS-CoV-2 NC_045512.2 | (22369)        | <a href="#">22369</a>                                                                              | <a href="#">22374</a> | <a href="#">22385</a> | <a href="#">22396</a> | <a href="#">22407</a> | <a href="#">22418</a> | <a href="#">22429</a> | <a href="#">22440</a> | <a href="#">22451</a> | <a href="#">22464</a> |
|                                          | (22369)<br>(1) | CTAAATCTAAATCATCTTTATTCATTAAATTCTTCCATATCACTTAGCTGTTTCGAGGTCAGTTTCTAAATCAGCAGCTGATTTACTTTTACTTTTCT |                       |                       |                       |                       |                       |                       |                       |                       |                       |
|                                          |                | Section 235                                                                                        |                       |                       |                       |                       |                       |                       |                       |                       |                       |
| T4 NC 000866.4<br>SARS-CoV-2 NC_045512.2 | (22465)        | <a href="#">22465</a>                                                                              | <a href="#">22473</a> | <a href="#">22484</a> | <a href="#">22495</a> | <a href="#">22506</a> | <a href="#">22517</a> | <a href="#">22528</a> | <a href="#">22539</a> | <a href="#">22560</a> |                       |
|                                          | (22465)<br>(1) | GGAGATTTAAATTTTTCAACCTTTGAGTTAATCAATTCATCAACTTCAGCTTCAACAATTTTATTACTATCAATAGCACCTAACTGATAAGCACGT   |                       |                       |                       |                       |                       |                       |                       |                       |                       |
|                                          |                | Section 236                                                                                        |                       |                       |                       |                       |                       |                       |                       |                       |                       |
| T4 NC 000866.4<br>SARS-CoV-2 NC_045512.2 | (22561)        | <a href="#">22561</a>                                                                              | <a href="#">22572</a> | <a href="#">22583</a> | <a href="#">22594</a> | <a href="#">22605</a> | <a href="#">22616</a> | <a href="#">22627</a> | <a href="#">22638</a> | <a href="#">22656</a> |                       |
|                                          | (22561)<br>(1) | TTAATAGCATCTCGGAATGGTTGATGCTTAAATAAAGGACCCAGAATGTAGTGCAGTTGGTATCTTTTGCACGCCAAGATTTTTCTTCGCGAATC    |                       |                       |                       |                       |                       |                       |                       |                       |                       |
|                                          |                | Section 237                                                                                        |                       |                       |                       |                       |                       |                       |                       |                       |                       |
| T4 NC 000866.4<br>SARS-CoV-2 NC_045512.2 | (22657)        | <a href="#">22657</a>                                                                              | <a href="#">22671</a> | <a href="#">22682</a> | <a href="#">22693</a> | <a href="#">22704</a> | <a href="#">22715</a> | <a href="#">22726</a> | <a href="#">22737</a> | <a href="#">22752</a> |                       |
|                                          | (22657)<br>(1) | ATCTCGCCAGTTTCTTCGTCAAGAAATTCACGAGCATACCAGCCATTTTTAGGTTTTACCACGAATCCTAATTCTAGAGCCATATCTAACAATCCA   |                       |                       |                       |                       |                       |                       |                       |                       |                       |
|                                          |                | Section 238                                                                                        |                       |                       |                       |                       |                       |                       |                       |                       |                       |
| T4 NC 000866.4<br>SARS-CoV-2 NC_045512.2 | (22753)        | <a href="#">22753</a>                                                                              | <a href="#">22759</a> | <a href="#">22770</a> | <a href="#">22781</a> | <a href="#">22792</a> | <a href="#">22803</a> | <a href="#">22814</a> | <a href="#">22825</a> | <a href="#">22836</a> | <a href="#">22848</a> |
|                                          | (22753)<br>(1) | GAATAAGGATCGATACCACCGTCAAATTTAACATCAATAAAGAATTTACTTTTTTCTTTAACGGTACGAGATTTTTCTACATTTAGAACAAATTGA   |                       |                       |                       |                       |                       |                       |                       |                       |                       |

## SARS-CoV-2 &amp; T4.apr

|                                          |                |                                                                                                    |                       |                       |                       |                       |                       |                       |                       |
|------------------------------------------|----------------|----------------------------------------------------------------------------------------------------|-----------------------|-----------------------|-----------------------|-----------------------|-----------------------|-----------------------|-----------------------|
|                                          |                | Section 239                                                                                        |                       |                       |                       |                       |                       |                       |                       |
| T4 NC 000866.4<br>SARS-CoV-2 NC_045512.2 | (22849)        | <a href="#">22849</a>                                                                              | <a href="#">22858</a> | <a href="#">22869</a> | <a href="#">22880</a> | <a href="#">22891</a> | <a href="#">22902</a> | <a href="#">22913</a> | <a href="#">22924</a> |
|                                          | (22849)<br>(1) | TACCCCTGAAGATCAGAACCATCTTTAATCTGGCGTTTACCGATAATGAATACGGTATCAGCCGAATACATCGGTCCAGTACCACCTCCCATAACT   |                       |                       |                       |                       |                       |                       |                       |
|                                          |                | Section 240                                                                                        |                       |                       |                       |                       |                       |                       |                       |
| T4 NC 000866.4<br>SARS-CoV-2 NC_045512.2 | (22945)        | <a href="#">22945</a>                                                                              | <a href="#">22957</a> | <a href="#">22968</a> | <a href="#">22979</a> | <a href="#">22990</a> | <a href="#">23001</a> | <a href="#">23012</a> | <a href="#">23023</a> |
|                                          | (22945)<br>(1) | GTTTTACTAAACATTTCTTGTGTTTCGTATGTATGGTTAATAGCAATACATGGAATATTTTTAGTACTAAAATAGGGAGTTACGATACGAAATAAG   |                       |                       |                       |                       |                       |                       |                       |
|                                          |                | Section 241                                                                                        |                       |                       |                       |                       |                       |                       |                       |
| T4 NC 000866.4<br>SARS-CoV-2 NC_045512.2 | (23041)        | <a href="#">23041</a>                                                                              | <a href="#">23056</a> | <a href="#">23067</a> | <a href="#">23078</a> | <a href="#">23089</a> | <a href="#">23100</a> | <a href="#">23111</a> | <a href="#">23122</a> |
|                                          | (23041)<br>(1) | CTTTTCATTGTTTTAGCTCTAGTCATATCACTAACAACCTTTTTTCATTTAAAGCATCTTCAGTTTCTTTCTTAGAAGCTAAGTTACCAAGTGAATCG |                       |                       |                       |                       |                       |                       |                       |
|                                          |                | Section 242                                                                                        |                       |                       |                       |                       |                       |                       |                       |
| T4 NC 000866.4<br>SARS-CoV-2 NC_045512.2 | (23137)        | <a href="#">23137</a>                                                                              | <a href="#">23144</a> | <a href="#">23155</a> | <a href="#">23166</a> | <a href="#">23177</a> | <a href="#">23188</a> | <a href="#">23199</a> | <a href="#">23210</a> |
|                                          | (23137)<br>(1) | ATAAAAACGACTACCTTTTCGCCGCGTTCAATTGCATCCAATTGATTAACCATGTCAATACGTAATTGCTCAAGTGATTGAACCGGAGTATGAATT   |                       |                       |                       |                       |                       |                       |                       |
|                                          |                | Section 243                                                                                        |                       |                       |                       |                       |                       |                       |                       |
| T4 NC 000866.4<br>SARS-CoV-2 NC_045512.2 | (23233)        | <a href="#">23233</a>                                                                              | <a href="#">23243</a> | <a href="#">23254</a> | <a href="#">23265</a> | <a href="#">23276</a> | <a href="#">23287</a> | <a href="#">23298</a> | <a href="#">23309</a> |
|                                          | (23233)<br>(1) | ACTCGTTCTGGATCGACTCCCATAGACCGCAAATAAGCAGGAGTAATACCAAATTCACATATCATAAAACAAACATACTGCATCAGGATATTGACGC  |                       |                       |                       |                       |                       |                       |                       |
|                                          |                | Section 244                                                                                        |                       |                       |                       |                       |                       |                       |                       |
| T4 NC 000866.4<br>SARS-CoV-2 NC_045512.2 | (23329)        | <a href="#">23329</a>                                                                              | <a href="#">23342</a> | <a href="#">23353</a> | <a href="#">23364</a> | <a href="#">23375</a> | <a href="#">23386</a> | <a href="#">23397</a> | <a href="#">23408</a> |
|                                          | (23329)<br>(1) | ATGTAAGATGACACCATTGTTAATCCAAAGTTTGATTTAAATGATTTTGATGGACCTGCCAAAATTAACAGACCAGATTGCATACCACCAGTAATT   |                       |                       |                       |                       |                       |                       |                       |
|                                          |                | Section 245                                                                                        |                       |                       |                       |                       |                       |                       |                       |
| T4 NC 000866.4<br>SARS-CoV-2 NC_045512.2 | (23425)        | <a href="#">23425</a>                                                                              | <a href="#">23430</a> | <a href="#">23441</a> | <a href="#">23452</a> | <a href="#">23463</a> | <a href="#">23474</a> | <a href="#">23485</a> | <a href="#">23496</a> |
|                                          | (23425)<br>(1) | TCACCAGAAAAGTGCAATATTCATCATAGGAATTTTTGTTTCGAACACATCTTTTTCATTAAAGAATTTAGATGCTGTGAATTCTGCAGTCAATTTA  |                       |                       |                       |                       |                       |                       |                       |

## SARS-CoV-2 &amp; T4.apr

|                                          |         |                                                                                                  |                       |                       |                       |                       |                       |                       |                       |
|------------------------------------------|---------|--------------------------------------------------------------------------------------------------|-----------------------|-----------------------|-----------------------|-----------------------|-----------------------|-----------------------|-----------------------|
|                                          |         | Section 246                                                                                      |                       |                       |                       |                       |                       |                       |                       |
| T4 NC 000866.4<br>SARS-CoV-2 NC_045512.2 | (23521) | <a href="#">23521</a>                                                                            | <a href="#">23529</a> | <a href="#">23540</a> | <a href="#">23551</a> | <a href="#">23562</a> | <a href="#">23573</a> | <a href="#">23584</a> | <a href="#">23595</a> |
|                                          | (23521) | GAAGTAGAAGCTTTAATCAAACGAGATTTTAAATCAGACATATAATACCTTATAGTAGTGTCTTGTTCCACGAAATACTTCGAGCATTCTTGCAT  |                       |                       |                       |                       |                       |                       |                       |
|                                          |         | -----                                                                                            |                       |                       |                       |                       |                       |                       |                       |
|                                          |         | Section 247                                                                                      |                       |                       |                       |                       |                       |                       |                       |
| T4 NC 000866.4<br>SARS-CoV-2 NC_045512.2 | (23617) | <a href="#">23617</a>                                                                            | <a href="#">23628</a> | <a href="#">23639</a> | <a href="#">23650</a> | <a href="#">23661</a> | <a href="#">23672</a> | <a href="#">23683</a> | <a href="#">23694</a> |
|                                          | (23617) | AAGATTTATTTGGAAATCCAGCTTCAATTGCTAATTTTTTAAGCTTAATAGCACCGGATTTTCCAGAGTTTTCCCATATTTCTTTAATCTTTTCAA |                       |                       |                       |                       |                       |                       |                       |
|                                          |         | -----                                                                                            |                       |                       |                       |                       |                       |                       |                       |
|                                          |         | Section 248                                                                                      |                       |                       |                       |                       |                       |                       |                       |
| T4 NC 000866.4<br>SARS-CoV-2 NC_045512.2 | (23713) | <a href="#">23713</a>                                                                            | <a href="#">23727</a> | <a href="#">23738</a> | <a href="#">23749</a> | <a href="#">23760</a> | <a href="#">23771</a> | <a href="#">23782</a> | <a href="#">23793</a> |
|                                          | (23713) | TGTTATCCACATTATTGGGTCACGTTTATGTGATGGTTTATTTCTATTATAACCATATGGATTATTAAGCAAAGCTTCTTTTCGTTTTGCTTTAG  |                       |                       |                       |                       |                       |                       |                       |
|                                          |         | -----                                                                                            |                       |                       |                       |                       |                       |                       |                       |
|                                          |         | Section 249                                                                                      |                       |                       |                       |                       |                       |                       |                       |
| T4 NC 000866.4<br>SARS-CoV-2 NC_045512.2 | (23809) | <a href="#">23809</a>                                                                            | <a href="#">23815</a> | <a href="#">23826</a> | <a href="#">23837</a> | <a href="#">23848</a> | <a href="#">23859</a> | <a href="#">23870</a> | <a href="#">23881</a> |
|                                          | (23809) | TTTCTTCTGACTGCTTTTTGCCTAGCTGGGCTTTCGGCAAACATCACTAAATCCAAGATGTTTTGGTTTTCTTTTTGAGCTTTTGAAATTTTTT   |                       |                       |                       |                       |                       |                       |                       |
|                                          |         | -----                                                                                            |                       |                       |                       |                       |                       |                       |                       |
|                                          |         | Section 250                                                                                      |                       |                       |                       |                       |                       |                       |                       |
| T4 NC 000866.4<br>SARS-CoV-2 NC_045512.2 | (23905) | <a href="#">23905</a>                                                                            | <a href="#">23914</a> | <a href="#">23925</a> | <a href="#">23936</a> | <a href="#">23947</a> | <a href="#">23958</a> | <a href="#">23969</a> | <a href="#">23980</a> |
|                                          | (23905) | CTTTGGTTTCTGATGAAACTCTATAACCAATTCTTCTACCACCCTCTCCACCAATTTTTAAATTATAAGTCATAGGATCATTACCACATCTATTG  |                       |                       |                       |                       |                       |                       |                       |
|                                          |         | -----                                                                                            |                       |                       |                       |                       |                       |                       |                       |
|                                          |         | Section 251                                                                                      |                       |                       |                       |                       |                       |                       |                       |
| T4 NC 000866.4<br>SARS-CoV-2 NC_045512.2 | (24001) | <a href="#">24001</a>                                                                            | <a href="#">24013</a> | <a href="#">24024</a> | <a href="#">24035</a> | <a href="#">24046</a> | <a href="#">24057</a> | <a href="#">24068</a> | <a href="#">24079</a> |
|                                          | (24001) | TTACTAATTCTCTTTCAGCATCACGGGCTGATTTAAATCTTTATAAAACCCAAGAATGCTTAAATTAAATTTTTCTTACCATACTTTTTCTTGG   |                       |                       |                       |                       |                       |                       |                       |
|                                          |         | -----                                                                                            |                       |                       |                       |                       |                       |                       |                       |
|                                          |         | Section 252                                                                                      |                       |                       |                       |                       |                       |                       |                       |
| T4 NC 000866.4<br>SARS-CoV-2 NC_045512.2 | (24097) | <a href="#">24097</a>                                                                            | <a href="#">24112</a> | <a href="#">24123</a> | <a href="#">24134</a> | <a href="#">24145</a> | <a href="#">24156</a> | <a href="#">24167</a> | <a href="#">24178</a> |
|                                          | (24097) | CTTGTGCTAATAAAGTTCCTGATCCCATATAACCATCATTTAAATCATCGGTTGAATGAGTTCCATAGTAAATTTTATTATTAACTAAATTAGTTA |                       |                       |                       |                       |                       |                       |                       |
|                                          |         | -----                                                                                            |                       |                       |                       |                       |                       |                       |                       |

## SARS-CoV-2 &amp; T4.apr

|                                          |                |                                                                                                    |                       |                       |                       |                       |                       |                       |                       |                       |                       |
|------------------------------------------|----------------|----------------------------------------------------------------------------------------------------|-----------------------|-----------------------|-----------------------|-----------------------|-----------------------|-----------------------|-----------------------|-----------------------|-----------------------|
| Section 253                              |                |                                                                                                    |                       |                       |                       |                       |                       |                       |                       |                       |                       |
| T4 NC 000866.4<br>SARS-CoV-2 NC_045512.2 | (24193)        | <a href="#">24193</a>                                                                              | <a href="#">24200</a> | <a href="#">24211</a> | <a href="#">24222</a> | <a href="#">24233</a> | <a href="#">24244</a> | <a href="#">24255</a> | <a href="#">24266</a> | <a href="#">24277</a> | <a href="#">24288</a> |
|                                          | (24193)<br>(1) | TAACATAAGTATAATTATATTTCTTTTCTTTATGTCTTTTCATGTCATTAATCAACTGCTATTTCGATGAACCTTCTCTCTTTTCTAATCAATATAAC |                       |                       |                       |                       |                       |                       |                       |                       |                       |
| Section 254                              |                |                                                                                                    |                       |                       |                       |                       |                       |                       |                       |                       |                       |
| T4 NC 000866.4<br>SARS-CoV-2 NC_045512.2 | (24289)        | <a href="#">24289</a>                                                                              | <a href="#">24299</a> | <a href="#">24310</a> | <a href="#">24321</a> | <a href="#">24332</a> | <a href="#">24343</a> | <a href="#">24354</a> | <a href="#">24365</a> | <a href="#">24384</a> |                       |
|                                          | (24289)<br>(1) | AAAAGAAGTCCCAAAAAGCAAACAGACCTAAACCGATAATAAGCAATAAAGGTCCTAACATTTATTCCACCGGTTAAAGATAAATAACTTTCTAAT   |                       |                       |                       |                       |                       |                       |                       |                       |                       |
| Section 255                              |                |                                                                                                    |                       |                       |                       |                       |                       |                       |                       |                       |                       |
| T4 NC 000866.4<br>SARS-CoV-2 NC_045512.2 | (24385)        | <a href="#">24385</a>                                                                              | <a href="#">24398</a> | <a href="#">24409</a> | <a href="#">24420</a> | <a href="#">24431</a> | <a href="#">24442</a> | <a href="#">24453</a> | <a href="#">24464</a> | <a href="#">24480</a> |                       |
|                                          | (24385)<br>(1) | AATAGTTCATAATTTTTATAAATCAATAGCTTTTTTGAACGCATCTTGCCATTTCGGCTTTCTTTGCACGGGTTTTATTTAAAATATCATGTTGAAT  |                       |                       |                       |                       |                       |                       |                       |                       |                       |
| Section 256                              |                |                                                                                                    |                       |                       |                       |                       |                       |                       |                       |                       |                       |
| T4 NC 000866.4<br>SARS-CoV-2 NC_045512.2 | (24481)        | <a href="#">24481</a>                                                                              | <a href="#">24486</a> | <a href="#">24497</a> | <a href="#">24508</a> | <a href="#">24519</a> | <a href="#">24530</a> | <a href="#">24541</a> | <a href="#">24552</a> | <a href="#">24563</a> | <a href="#">24576</a> |
|                                          | (24481)<br>(1) | AGAAAGCATCTCTTTACGCAAAACATCACTGTGTTTTAACTCATTGACTCTATCAATGAGTTCAGCACGATTATTTACATAAAAACGAGCATCATT   |                       |                       |                       |                       |                       |                       |                       |                       |                       |
| Section 257                              |                |                                                                                                    |                       |                       |                       |                       |                       |                       |                       |                       |                       |
| T4 NC 000866.4<br>SARS-CoV-2 NC_045512.2 | (24577)        | <a href="#">24577</a>                                                                              | <a href="#">24585</a> | <a href="#">24596</a> | <a href="#">24607</a> | <a href="#">24618</a> | <a href="#">24629</a> | <a href="#">24640</a> | <a href="#">24651</a> | <a href="#">24672</a> |                       |
|                                          | (24577)<br>(1) | AATAATTCGATGTTTGGTATCAAATTCTTCGTCAATTAGCATCACTGCATCAGATGCCATTGTTTCCCAGACGCGTAAGGTAATAAAGTTGTCATT   |                       |                       |                       |                       |                       |                       |                       |                       |                       |
| Section 258                              |                |                                                                                                    |                       |                       |                       |                       |                       |                       |                       |                       |                       |
| T4 NC 000866.4<br>SARS-CoV-2 NC_045512.2 | (24673)        | <a href="#">24673</a>                                                                              | <a href="#">24684</a> | <a href="#">24695</a> | <a href="#">24706</a> | <a href="#">24717</a> | <a href="#">24728</a> | <a href="#">24739</a> | <a href="#">24750</a> | <a href="#">24768</a> |                       |
|                                          | (24673)<br>(1) | ATAATTCTTGTCACCAATAATTAATGCAGCAATAGCTTGACTATTCTTTTCAGATACCATGTTTCATAGGAATTTTTCCAGTGAACACCGGAGCTTT  |                       |                       |                       |                       |                       |                       |                       |                       |                       |
| Section 259                              |                |                                                                                                    |                       |                       |                       |                       |                       |                       |                       |                       |                       |
| T4 NC 000866.4<br>SARS-CoV-2 NC_045512.2 | (24769)        | <a href="#">24769</a>                                                                              | <a href="#">24783</a> | <a href="#">24794</a> | <a href="#">24805</a> | <a href="#">24816</a> | <a href="#">24827</a> | <a href="#">24838</a> | <a href="#">24849</a> | <a href="#">24864</a> |                       |
|                                          | (24769)<br>(1) | GGTCCAAGGATATTTAGGATTTTTAAACTGTTTTTCTCGTGCATTGCCAAAAAACTCAATATTTAAACCGGTGTCAAATAAGAATTCTACCATCTT   |                       |                       |                       |                       |                       |                       |                       |                       |                       |

## SARS-CoV-2 &amp; T4.apr

|                                          |         |                                                                                                      |                       |                       |                       |                       |                       |                       |                       |                       |                       |
|------------------------------------------|---------|------------------------------------------------------------------------------------------------------|-----------------------|-----------------------|-----------------------|-----------------------|-----------------------|-----------------------|-----------------------|-----------------------|-----------------------|
| Section 260                              |         |                                                                                                      |                       |                       |                       |                       |                       |                       |                       |                       |                       |
| T4 NC 000866.4<br>SARS-CoV-2 NC_045512.2 | (24865) | <a href="#">24865</a>                                                                                | <a href="#">24871</a> | <a href="#">24882</a> | <a href="#">24893</a> | <a href="#">24904</a> | <a href="#">24915</a> | <a href="#">24926</a> | <a href="#">24937</a> | <a href="#">24948</a> | <a href="#">24960</a> |
|                                          | (24865) | GGATTTCGCGTTTGACCGGACCGAAATGAACCGCCATAAATAACATCCAAAGTTTTCTTGGTAGGCTTAGATAAATTGAAAATCGTTTCATATGAATTTT |                       |                       |                       |                       |                       |                       |                       |                       |                       |
|                                          | (1)     | -----                                                                                                |                       |                       |                       |                       |                       |                       |                       |                       |                       |
| Section 261                              |         |                                                                                                      |                       |                       |                       |                       |                       |                       |                       |                       |                       |
| T4 NC 000866.4<br>SARS-CoV-2 NC_045512.2 | (24961) | <a href="#">24961</a>                                                                                | <a href="#">24970</a> | <a href="#">24981</a> | <a href="#">24992</a> | <a href="#">25003</a> | <a href="#">25014</a> | <a href="#">25025</a> | <a href="#">25036</a> | <a href="#">25056</a> |                       |
|                                          | (24961) | ATATTGTTCAATAGGAAAATATTCAAATTCATAACATTATCAACTTTCTTATGCGCAGCCTTAGCAATGTCTAAATTTATACCTTGGGAAATCAC      |                       |                       |                       |                       |                       |                       |                       |                       |                       |
|                                          | (1)     | -----                                                                                                |                       |                       |                       |                       |                       |                       |                       |                       |                       |
| Section 262                              |         |                                                                                                      |                       |                       |                       |                       |                       |                       |                       |                       |                       |
| T4 NC 000866.4<br>SARS-CoV-2 NC_045512.2 | (25057) | <a href="#">25057</a>                                                                                | <a href="#">25069</a> | <a href="#">25080</a> | <a href="#">25091</a> | <a href="#">25102</a> | <a href="#">25113</a> | <a href="#">25124</a> | <a href="#">25135</a> | <a href="#">25152</a> |                       |
|                                          | (25057) | TTTAATTGGTGATTTAATTAATAGCTCTTCTTCAGTGTACAAATATGCCCATGGTCTATTTTTTAACATTTGGCCAAGACTGCGAAAACGGCAAACG    |                       |                       |                       |                       |                       |                       |                       |                       |                       |
|                                          | (1)     | -----                                                                                                |                       |                       |                       |                       |                       |                       |                       |                       |                       |
| Section 263                              |         |                                                                                                      |                       |                       |                       |                       |                       |                       |                       |                       |                       |
| T4 NC 000866.4<br>SARS-CoV-2 NC_045512.2 | (25153) | <a href="#">25153</a>                                                                                | <a href="#">25168</a> | <a href="#">25179</a> | <a href="#">25190</a> | <a href="#">25201</a> | <a href="#">25212</a> | <a href="#">25223</a> | <a href="#">25234</a> | <a href="#">25248</a> |                       |
|                                          | (25153) | TATATCTGTAAATAAATAAATTTTACTTTTGTATTTTGCCATAAATTTTTGCGCAGATAAAATTGCTAAATTAGGTTTACCGCCAAAAAAGTT        |                       |                       |                       |                       |                       |                       |                       |                       |                       |
|                                          | (1)     | -----                                                                                                |                       |                       |                       |                       |                       |                       |                       |                       |                       |
| Section 264                              |         |                                                                                                      |                       |                       |                       |                       |                       |                       |                       |                       |                       |
| T4 NC 000866.4<br>SARS-CoV-2 NC_045512.2 | (25249) | <a href="#">25249</a>                                                                                | <a href="#">25256</a> | <a href="#">25267</a> | <a href="#">25278</a> | <a href="#">25289</a> | <a href="#">25300</a> | <a href="#">25311</a> | <a href="#">25322</a> | <a href="#">25333</a> | <a href="#">25344</a> |
|                                          | (25249) | AATAGAAGAATTAACAACCTATCAAACGGTCATAATCATTAACATCTACTTCATCAAAAGATTTAGTGTAACACCATTTTTAAGAGAAATAATGTC     |                       |                       |                       |                       |                       |                       |                       |                       |                       |
|                                          | (1)     | -----                                                                                                |                       |                       |                       |                       |                       |                       |                       |                       |                       |
| Section 265                              |         |                                                                                                      |                       |                       |                       |                       |                       |                       |                       |                       |                       |
| T4 NC 000866.4<br>SARS-CoV-2 NC_045512.2 | (25345) | <a href="#">25345</a>                                                                                | <a href="#">25355</a> | <a href="#">25366</a> | <a href="#">25377</a> | <a href="#">25388</a> | <a href="#">25399</a> | <a href="#">25410</a> | <a href="#">25421</a> | <a href="#">25440</a> |                       |
|                                          | (25345) | GACATTAAGACCCATTTTCAGAAATAACTTTAAAAAGATAAATAGTTTCAGAAGATGGAACAGTTTTTAAATTAATAACATTATTACCCATATTAAT    |                       |                       |                       |                       |                       |                       |                       |                       |                       |
|                                          | (1)     | -----                                                                                                |                       |                       |                       |                       |                       |                       |                       |                       |                       |
| Section 266                              |         |                                                                                                      |                       |                       |                       |                       |                       |                       |                       |                       |                       |
| T4 NC 000866.4<br>SARS-CoV-2 NC_045512.2 | (25441) | <a href="#">25441</a>                                                                                | <a href="#">25454</a> | <a href="#">25465</a> | <a href="#">25476</a> | <a href="#">25487</a> | <a href="#">25498</a> | <a href="#">25509</a> | <a href="#">25520</a> | <a href="#">25536</a> |                       |
|                                          | (25441) | TATAGCAATTTTCATATTATTCCTTTTATGTTAAACGATTAAGCGTATTTTCCTACATAATCTTTTTTCGAAATATGTGTTTCGCCAGTTTTCCAC     |                       |                       |                       |                       |                       |                       |                       |                       |                       |
|                                          | (1)     | -----                                                                                                |                       |                       |                       |                       |                       |                       |                       |                       |                       |

## SARS-CoV-2 &amp; T4.apr

|                                          |         |                                                                                                   |                       |                       |                       |                       |                       |                       |                       |
|------------------------------------------|---------|---------------------------------------------------------------------------------------------------|-----------------------|-----------------------|-----------------------|-----------------------|-----------------------|-----------------------|-----------------------|
|                                          |         | Section 267                                                                                       |                       |                       |                       |                       |                       |                       |                       |
| T4 NC 000866.4<br>SARS-CoV-2 NC_045512.2 | (25537) | <a href="#">25537</a>                                                                             | <a href="#">25542</a> | <a href="#">25553</a> | <a href="#">25564</a> | <a href="#">25575</a> | <a href="#">25586</a> | <a href="#">25597</a> | <a href="#">25608</a> |
|                                          | (25537) | CAATGATCAACCAAATAAAAAATGACGAGAATACACATGTAGGCTTCCAACATTCCATATAATGGAACCTGCTTTATACTGGCGAGTTGAATCACCT |                       |                       |                       |                       |                       |                       |                       |
|                                          |         | -----                                                                                             |                       |                       |                       |                       |                       |                       |                       |
|                                          |         | Section 268                                                                                       |                       |                       |                       |                       |                       |                       |                       |
| T4 NC 000866.4<br>SARS-CoV-2 NC_045512.2 | (25633) | <a href="#">25633</a>                                                                             | <a href="#">25641</a> | <a href="#">25652</a> | <a href="#">25663</a> | <a href="#">25674</a> | <a href="#">25685</a> | <a href="#">25696</a> | <a href="#">25707</a> |
|                                          | (25633) | GCATTCAAATCAGATACTAATTTATCTAATACGTATTTTTGCCATGCATAATCATTACGGAATCCGAAGACCACGTCATTTGAGCGCATGTTAACA  |                       |                       |                       |                       |                       |                       |                       |
|                                          |         | -----                                                                                             |                       |                       |                       |                       |                       |                       |                       |
|                                          |         | Section 269                                                                                       |                       |                       |                       |                       |                       |                       |                       |
| T4 NC 000866.4<br>SARS-CoV-2 NC_045512.2 | (25729) | <a href="#">25729</a>                                                                             | <a href="#">25740</a> | <a href="#">25751</a> | <a href="#">25762</a> | <a href="#">25773</a> | <a href="#">25784</a> | <a href="#">25795</a> | <a href="#">25806</a> |
|                                          | (25729) | ACCGCATTGATTTTCTTGTCACGAATCAGGTATTGTACTGTATTCGTGCACATGAAATCTGACATACCATCTTTATTATAGTCAAACGTCATAGAT  |                       |                       |                       |                       |                       |                       |                       |
|                                          |         | -----                                                                                             |                       |                       |                       |                       |                       |                       |                       |
|                                          |         | Section 270                                                                                       |                       |                       |                       |                       |                       |                       |                       |
| T4 NC 000866.4<br>SARS-CoV-2 NC_045512.2 | (25825) | <a href="#">25825</a>                                                                             | <a href="#">25839</a> | <a href="#">25850</a> | <a href="#">25861</a> | <a href="#">25872</a> | <a href="#">25883</a> | <a href="#">25894</a> | <a href="#">25905</a> |
|                                          | (25825) | GGACGAGTATAAAATCATGATACCACGTCGAGAATCAGGATTTTGACCAAGTTCAGCTAAACACATGTCATACTGAGCATAGTTATCTTCTGACCAG |                       |                       |                       |                       |                       |                       |                       |
|                                          |         | -----                                                                                             |                       |                       |                       |                       |                       |                       |                       |
|                                          |         | Section 271                                                                                       |                       |                       |                       |                       |                       |                       |                       |
| T4 NC 000866.4<br>SARS-CoV-2 NC_045512.2 | (25921) | <a href="#">25921</a>                                                                             | <a href="#">25927</a> | <a href="#">25938</a> | <a href="#">25949</a> | <a href="#">25960</a> | <a href="#">25971</a> | <a href="#">25982</a> | <a href="#">25993</a> |
|                                          | (25921) | ATAGCCCAACCATAATTCGAGTTAATTTACCTTTAGAAGATGCTACTTGTTGCCAAATCTTCGGTGTTTCACCCGGAATATCTTTAACGAACAAG   |                       |                       |                       |                       |                       |                       |                       |
|                                          |         | -----                                                                                             |                       |                       |                       |                       |                       |                       |                       |
|                                          |         | Section 272                                                                                       |                       |                       |                       |                       |                       |                       |                       |
| T4 NC 000866.4<br>SARS-CoV-2 NC_045512.2 | (26017) | <a href="#">26017</a>                                                                             | <a href="#">26026</a> | <a href="#">26037</a> | <a href="#">26048</a> | <a href="#">26059</a> | <a href="#">26070</a> | <a href="#">26081</a> | <a href="#">26092</a> |
|                                          | (26017) | CTTTTAGATTTATACCATTCAAGTTCACGCTGAATGTATTTCATCATTAAGAGCGCCAAAAATAAACGGTTCATCTGCTACAAATGATGCGCCAATA |                       |                       |                       |                       |                       |                       |                       |
|                                          |         | -----                                                                                             |                       |                       |                       |                       |                       |                       |                       |
|                                          |         | Section 273                                                                                       |                       |                       |                       |                       |                       |                       |                       |
| T4 NC 000866.4<br>SARS-CoV-2 NC_045512.2 | (26113) | <a href="#">26113</a>                                                                             | <a href="#">26125</a> | <a href="#">26136</a> | <a href="#">26147</a> | <a href="#">26158</a> | <a href="#">26169</a> | <a href="#">26180</a> | <a href="#">26191</a> |
|                                          | (26113) | ATTTCAATAGTTTTAACACCTGTTTTATCAACTACGAAATCTTTTTCTTTTAAATGCAAGCCCCAAATGAAGACGGATTTCTTCAACTGTCATAGAG |                       |                       |                       |                       |                       |                       |                       |
|                                          |         | -----                                                                                             |                       |                       |                       |                       |                       |                       |                       |
|                                          |         | 26208                                                                                             |                       |                       |                       |                       |                       |                       |                       |

## SARS-CoV-2 &amp; T4.apr

|                                          |         |                                                                                                    |                       |                       |                       |                       |                       |                       |                       |                       |                       |
|------------------------------------------|---------|----------------------------------------------------------------------------------------------------|-----------------------|-----------------------|-----------------------|-----------------------|-----------------------|-----------------------|-----------------------|-----------------------|-----------------------|
|                                          |         | Section 274                                                                                        |                       |                       |                       |                       |                       |                       |                       |                       |                       |
| T4 NC 000866.4<br>SARS-CoV-2 NC_045512.2 | (26209) | <a href="#">26209</a>                                                                              | <a href="#">26224</a> | <a href="#">26235</a> | <a href="#">26246</a> | <a href="#">26257</a> | <a href="#">26268</a> | <a href="#">26279</a> | <a href="#">26290</a> | <a href="#">26304</a> |                       |
|                                          | (26209) | TCACCTAATCATTTAAACCTCAATTGATACATTCATATTTAACTTGTAACAGTAATAAACTCCAACCTAAAATAATAGTTGGAATCATAAGAGGAAC  |                       |                       |                       |                       |                       |                       |                       |                       |                       |
|                                          | (1)     | -----                                                                                              |                       |                       |                       |                       |                       |                       |                       |                       |                       |
|                                          |         | Section 275                                                                                        |                       |                       |                       |                       |                       |                       |                       |                       |                       |
| T4 NC 000866.4<br>SARS-CoV-2 NC_045512.2 | (26305) | <a href="#">26305</a>                                                                              | <a href="#">26312</a> | <a href="#">26323</a> | <a href="#">26334</a> | <a href="#">26345</a> | <a href="#">26356</a> | <a href="#">26367</a> | <a href="#">26378</a> | <a href="#">26389</a> | <a href="#">26400</a> |
|                                          | (26305) | CGTTACACTATAGTATATACTTATTATAATCATCAAGATTAAAAGCAATGCTGCTATAATTTTGCTTTTCATTCTCTCTCTGATGATAATTACC     |                       |                       |                       |                       |                       |                       |                       |                       |                       |
|                                          | (1)     | -----                                                                                              |                       |                       |                       |                       |                       |                       |                       |                       |                       |
|                                          |         | Section 276                                                                                        |                       |                       |                       |                       |                       |                       |                       |                       |                       |
| T4 NC 000866.4<br>SARS-CoV-2 NC_045512.2 | (26401) | <a href="#">26401</a>                                                                              | <a href="#">26411</a> | <a href="#">26422</a> | <a href="#">26433</a> | <a href="#">26444</a> | <a href="#">26455</a> | <a href="#">26466</a> | <a href="#">26477</a> | <a href="#">26496</a> |                       |
|                                          | (26401) | TGATTTGGCTGCGCAGACTTTTGTAGTTTCACCTGCAATTGACCAAATAAATGTAATAAACCAACCAATAATTGACCAGTTAAACAGTAAAGATGCG  |                       |                       |                       |                       |                       |                       |                       |                       |                       |
|                                          | (1)     | -----                                                                                              |                       |                       |                       |                       |                       |                       |                       |                       |                       |
|                                          |         | Section 277                                                                                        |                       |                       |                       |                       |                       |                       |                       |                       |                       |
| T4 NC 000866.4<br>SARS-CoV-2 NC_045512.2 | (26497) | <a href="#">26497</a>                                                                              | <a href="#">26510</a> | <a href="#">26521</a> | <a href="#">26532</a> | <a href="#">26543</a> | <a href="#">26554</a> | <a href="#">26565</a> | <a href="#">26576</a> | <a href="#">26592</a> |                       |
|                                          | (26497) | AAAAAGATTCTACTGTCGATTTTGACCCACGCATCAAGGCGATAAACCATGGAAGCATGTATATAATAATAGCCAACACGCCTGAAACTAAACC     |                       |                       |                       |                       |                       |                       |                       |                       |                       |
|                                          | (1)     | -----                                                                                              |                       |                       |                       |                       |                       |                       |                       |                       |                       |
|                                          |         | Section 278                                                                                        |                       |                       |                       |                       |                       |                       |                       |                       |                       |
| T4 NC 000866.4<br>SARS-CoV-2 NC_045512.2 | (26593) | <a href="#">26593</a>                                                                              | <a href="#">26598</a> | <a href="#">26609</a> | <a href="#">26620</a> | <a href="#">26631</a> | <a href="#">26642</a> | <a href="#">26653</a> | <a href="#">26664</a> | <a href="#">26675</a> | <a href="#">26688</a> |
|                                          | (26593) | ATAAAAAATTGAACCTGCTACTAAAGTTTCCATGTTTTCTCACTTAGGTCAAATTTTTTACACATGAATTATAAGAATTCCTACTACATACTCCATCG |                       |                       |                       |                       |                       |                       |                       |                       |                       |
|                                          | (1)     | -----                                                                                              |                       |                       |                       |                       |                       |                       |                       |                       |                       |
|                                          |         | Section 279                                                                                        |                       |                       |                       |                       |                       |                       |                       |                       |                       |
| T4 NC 000866.4<br>SARS-CoV-2 NC_045512.2 | (26689) | <a href="#">26689</a>                                                                              | <a href="#">26697</a> | <a href="#">26708</a> | <a href="#">26719</a> | <a href="#">26730</a> | <a href="#">26741</a> | <a href="#">26752</a> | <a href="#">26763</a> | <a href="#">26784</a> |                       |
|                                          | (26689) | GAGCGTTTTTACCTGTACGCCACTGGTAATTATTAGCCCAATTTGCCCAAAGCTCAGCGCAGTAGTTTTCAATTTTTTCTTCGCGTGTAATTACAT   |                       |                       |                       |                       |                       |                       |                       |                       |                       |
|                                          | (1)     | -----                                                                                              |                       |                       |                       |                       |                       |                       |                       |                       |                       |
|                                          |         | Section 280                                                                                        |                       |                       |                       |                       |                       |                       |                       |                       |                       |
| T4 NC 000866.4<br>SARS-CoV-2 NC_045512.2 | (26785) | <a href="#">26785</a>                                                                              | <a href="#">26796</a> | <a href="#">26807</a> | <a href="#">26818</a> | <a href="#">26829</a> | <a href="#">26840</a> | <a href="#">26851</a> | <a href="#">26862</a> | <a href="#">26880</a> |                       |
|                                          | (26785) | CTGAATTACGATATGCTTGAGCAGATTCATCTGGACGAATAGCTTCGTCAAAATTCGCCTGCATTTGTTCTACTGTCTGTTTTGGAGCTTCTTTAT   |                       |                       |                       |                       |                       |                       |                       |                       |                       |
|                                          | (1)     | -----                                                                                              |                       |                       |                       |                       |                       |                       |                       |                       |                       |



## SARS-CoV-2 &amp; T4.apr

|                                          |         |                                                                                                   |                       |                       |                       |                       |                       |                       |                       |                       |                       |
|------------------------------------------|---------|---------------------------------------------------------------------------------------------------|-----------------------|-----------------------|-----------------------|-----------------------|-----------------------|-----------------------|-----------------------|-----------------------|-----------------------|
|                                          |         | Section 281                                                                                       |                       |                       |                       |                       |                       |                       |                       |                       |                       |
| T4 NC 000866.4<br>SARS-CoV-2 NC_045512.2 | (26881) | <a href="#">26881</a>                                                                             | <a href="#">26895</a> | <a href="#">26906</a> | <a href="#">26917</a> | <a href="#">26928</a> | <a href="#">26939</a> | <a href="#">26950</a> | <a href="#">26961</a> | <a href="#">26976</a> |                       |
|                                          | (26881) | AACACTTGACATTAGGATTATAAAATTTGCTTGAACAGTTTACAATTTTCTACATCAGACTGATTTACTACCGGTCCTTGAGCTACACAACCAG    |                       |                       |                       |                       |                       |                       |                       |                       |                       |
|                                          | (1)     | -----                                                                                             |                       |                       |                       |                       |                       |                       |                       |                       |                       |
|                                          |         | Section 282                                                                                       |                       |                       |                       |                       |                       |                       |                       |                       |                       |
| T4 NC 000866.4<br>SARS-CoV-2 NC_045512.2 | (26977) | <a href="#">26977</a>                                                                             | <a href="#">26983</a> | <a href="#">26994</a> | <a href="#">27005</a> | <a href="#">27016</a> | <a href="#">27027</a> | <a href="#">27038</a> | <a href="#">27049</a> | <a href="#">27060</a> | <a href="#">27072</a> |
|                                          | (26977) | CAAGACCTAATGCAATAACCAAAATAGCGATTTTCATTTTCATTCTCCAAATCCGTATCAGTAGTTGATAGTTGTATAGTACCATGGAAGAACAGTC |                       |                       |                       |                       |                       |                       |                       |                       |                       |
|                                          | (1)     | -----                                                                                             |                       |                       |                       |                       |                       |                       |                       |                       |                       |
|                                          |         | Section 283                                                                                       |                       |                       |                       |                       |                       |                       |                       |                       |                       |
| T4 NC 000866.4<br>SARS-CoV-2 NC_045512.2 | (27073) | <a href="#">27073</a>                                                                             | <a href="#">27082</a> | <a href="#">27093</a> | <a href="#">27104</a> | <a href="#">27115</a> | <a href="#">27126</a> | <a href="#">27137</a> | <a href="#">27148</a> | <a href="#">27168</a> |                       |
|                                          | (27073) | TTGTAAACAGTTTTGTGAAAAAATTTTAGGGAATCCAAAGGGTCCAGAATCATCTCTTTTTCATAAGTATAGATTTATATTACTTGTATGAAAAA   |                       |                       |                       |                       |                       |                       |                       |                       |                       |
|                                          | (1)     | -----                                                                                             |                       |                       |                       |                       |                       |                       |                       |                       |                       |
|                                          |         | Section 284                                                                                       |                       |                       |                       |                       |                       |                       |                       |                       |                       |
| T4 NC 000866.4<br>SARS-CoV-2 NC_045512.2 | (27169) | <a href="#">27169</a>                                                                             | <a href="#">27181</a> | <a href="#">27192</a> | <a href="#">27203</a> | <a href="#">27214</a> | <a href="#">27225</a> | <a href="#">27236</a> | <a href="#">27247</a> | <a href="#">27264</a> |                       |
|                                          | (27169) | GGGACCTGGAGGTCCTAGATTTATTCTATCAGCCAAACAGGAAGTCTAACGAAGCTTTTCTTCATAGTCCATGCCAGCCGATTCACACATACCCG   |                       |                       |                       |                       |                       |                       |                       |                       |                       |
|                                          | (1)     | -----                                                                                             |                       |                       |                       |                       |                       |                       |                       |                       |                       |
|                                          |         | Section 285                                                                                       |                       |                       |                       |                       |                       |                       |                       |                       |                       |
| T4 NC 000866.4<br>SARS-CoV-2 NC_045512.2 | (27265) | <a href="#">27265</a>                                                                             | <a href="#">27280</a> | <a href="#">27291</a> | <a href="#">27302</a> | <a href="#">27313</a> | <a href="#">27324</a> | <a href="#">27335</a> | <a href="#">27346</a> | <a href="#">27360</a> |                       |
|                                          | (27265) | CAAGCGGTTTAACAAACGATTTTGGAAACAAAGTTGAGTGGTCAATCCAAGATAGCACATCAGAACGAATTTCTTTTGGAAAGTTCTGTACCCGATG |                       |                       |                       |                       |                       |                       |                       |                       |                       |
|                                          | (1)     | -----                                                                                             |                       |                       |                       |                       |                       |                       |                       |                       |                       |
|                                          |         | Section 286                                                                                       |                       |                       |                       |                       |                       |                       |                       |                       |                       |
| T4 NC 000866.4<br>SARS-CoV-2 NC_045512.2 | (27361) | <a href="#">27361</a>                                                                             | <a href="#">27368</a> | <a href="#">27379</a> | <a href="#">27390</a> | <a href="#">27401</a> | <a href="#">27412</a> | <a href="#">27423</a> | <a href="#">27434</a> | <a href="#">27445</a> | <a href="#">27456</a> |
|                                          | (27361) | GCCAAGCAATGCACTTGTCAACCAATGGATTTCTTTCACGTAATGGAAGAACCATTACTTTATTTCCATCCAAAATTGGAGCTACACCTAAACCGC  |                       |                       |                       |                       |                       |                       |                       |                       |                       |
|                                          | (1)     | -----                                                                                             |                       |                       |                       |                       |                       |                       |                       |                       |                       |
|                                          |         | Section 287                                                                                       |                       |                       |                       |                       |                       |                       |                       |                       |                       |
| T4 NC 000866.4<br>SARS-CoV-2 NC_045512.2 | (27457) | <a href="#">27457</a>                                                                             | <a href="#">27467</a> | <a href="#">27478</a> | <a href="#">27489</a> | <a href="#">27500</a> | <a href="#">27511</a> | <a href="#">27522</a> | <a href="#">27533</a> | <a href="#">27552</a> |                       |
|                                          | (27457) | TAACAGCTCGACGATAAGTTAGCACACCACGAATATGGAACGGGCATTTAAATCCTGGCCAACCTTTATCATCATATTTTCGCTATATCGTTCGCAG |                       |                       |                       |                       |                       |                       |                       |                       |                       |
|                                          | (1)     | -----                                                                                             |                       |                       |                       |                       |                       |                       |                       |                       |                       |

## SARS-CoV-2 &amp; T4.apr

|                                          |         |                                                                                                    |                       |                       |                       |                       |                       |                       |                       |                       |                       |
|------------------------------------------|---------|----------------------------------------------------------------------------------------------------|-----------------------|-----------------------|-----------------------|-----------------------|-----------------------|-----------------------|-----------------------|-----------------------|-----------------------|
|                                          |         | Section 288                                                                                        |                       |                       |                       |                       |                       |                       |                       |                       |                       |
| T4 NC 000866.4<br>SARS-CoV-2 NC_045512.2 | (27553) | <a href="#">27553</a>                                                                              | <a href="#">27566</a> | <a href="#">27577</a> | <a href="#">27588</a> | <a href="#">27599</a> | <a href="#">27610</a> | <a href="#">27621</a> | <a href="#">27632</a> | <a href="#">27648</a> |                       |
|                                          | (27553) | TTTTTACTTCAGCAATAACTTTATAGTCAAGTTGACGATATTCTTTCTCGAAGTTCTTGTTAGTATTCTTGGACAGACTCTTCACCTTCCTGAAGAA  |                       |                       |                       |                       |                       |                       |                       |                       |                       |
|                                          | (1)     | -----                                                                                              |                       |                       |                       |                       |                       |                       |                       |                       |                       |
|                                          |         | Section 289                                                                                        |                       |                       |                       |                       |                       |                       |                       |                       |                       |
| T4 NC 000866.4<br>SARS-CoV-2 NC_045512.2 | (27649) | <a href="#">27649</a>                                                                              | <a href="#">27654</a> | <a href="#">27665</a> | <a href="#">27676</a> | <a href="#">27687</a> | <a href="#">27698</a> | <a href="#">27709</a> | <a href="#">27720</a> | <a href="#">27731</a> | <a href="#">27744</a> |
|                                          | (27649) | TACGACGAATACTTTCTTCGAGAGCTTCTTGCACTGCTTTTGGTGTTGAACCTCTGCTGAGTTTCCATACCCATGATTTTTAGATGCGGTTTCAGCAA |                       |                       |                       |                       |                       |                       |                       |                       |                       |
|                                          | (1)     | -----                                                                                              |                       |                       |                       |                       |                       |                       |                       |                       |                       |
|                                          |         | Section 290                                                                                        |                       |                       |                       |                       |                       |                       |                       |                       |                       |
| T4 NC 000866.4<br>SARS-CoV-2 NC_045512.2 | (27745) | <a href="#">27745</a>                                                                              | <a href="#">27753</a> | <a href="#">27764</a> | <a href="#">27775</a> | <a href="#">27786</a> | <a href="#">27797</a> | <a href="#">27808</a> | <a href="#">27819</a> | <a href="#">27840</a> |                       |
|                                          | (27745) | ATCGCTTATCTTCCATATCATAAACGTTTCAGAGCATAACGCTTTTTTCGCTTTCCAAAATCCACCAACGCCCTTTGAACCAAGCGGAGGGCAAGAAA |                       |                       |                       |                       |                       |                       |                       |                       |                       |
|                                          | (1)     | -----                                                                                              |                       |                       |                       |                       |                       |                       |                       |                       |                       |
|                                          |         | Section 291                                                                                        |                       |                       |                       |                       |                       |                       |                       |                       |                       |
| T4 NC 000866.4<br>SARS-CoV-2 NC_045512.2 | (27841) | <a href="#">27841</a>                                                                              | <a href="#">27852</a> | <a href="#">27863</a> | <a href="#">27874</a> | <a href="#">27885</a> | <a href="#">27896</a> | <a href="#">27907</a> | <a href="#">27918</a> | <a href="#">27936</a> |                       |
|                                          | (27841) | TAGCTTCACGGTCCATATGCATCAGATGCTCGCGGTTATTCATATAATCACATAACTCACGATATGCAACATCAATCATAGGTTCCATCTTTTTCT   |                       |                       |                       |                       |                       |                       |                       |                       |                       |
|                                          | (1)     | -----                                                                                              |                       |                       |                       |                       |                       |                       |                       |                       |                       |
|                                          |         | Section 292                                                                                        |                       |                       |                       |                       |                       |                       |                       |                       |                       |
| T4 NC 000866.4<br>SARS-CoV-2 NC_045512.2 | (27937) | <a href="#">27937</a>                                                                              | <a href="#">27951</a> | <a href="#">27962</a> | <a href="#">27973</a> | <a href="#">27984</a> | <a href="#">27995</a> | <a href="#">28006</a> | <a href="#">28017</a> | <a href="#">28032</a> |                       |
|                                          | (27937) | TACCGAACTGATTCATGAATTCAACCAAATCGTTCTGCTCTTTGAATCGGTCAAGACCAACTTTTTCAATAACTTTATCTACGCAAACATATACCG   |                       |                       |                       |                       |                       |                       |                       |                       |                       |
|                                          | (1)     | -----                                                                                              |                       |                       |                       |                       |                       |                       |                       |                       |                       |
|                                          |         | Section 293                                                                                        |                       |                       |                       |                       |                       |                       |                       |                       |                       |
| T4 NC 000866.4<br>SARS-CoV-2 NC_045512.2 | (28033) | <a href="#">28033</a>                                                                              | <a href="#">28039</a> | <a href="#">28050</a> | <a href="#">28061</a> | <a href="#">28072</a> | <a href="#">28083</a> | <a href="#">28094</a> | <a href="#">28105</a> | <a href="#">28116</a> | <a href="#">28128</a> |
|                                          | (28033) | AATCAGTATCACCTGCTGCAATGAAATCTTCATCATTAGTTCCGCATACTTTATTTCAGATATTCATTAATTTTACGAGCAATCCACTGAATACCGA  |                       |                       |                       |                       |                       |                       |                       |                       |                       |
|                                          | (1)     | -----                                                                                              |                       |                       |                       |                       |                       |                       |                       |                       |                       |
|                                          |         | Section 294                                                                                        |                       |                       |                       |                       |                       |                       |                       |                       |                       |
| T4 NC 000866.4<br>SARS-CoV-2 NC_045512.2 | (28129) | <a href="#">28129</a>                                                                              | <a href="#">28138</a> | <a href="#">28149</a> | <a href="#">28160</a> | <a href="#">28171</a> | <a href="#">28182</a> | <a href="#">28193</a> | <a href="#">28204</a> | <a href="#">28224</a> |                       |
|                                          | (28129) | CTTGGCCGAAAATTGTGATAGCAGTAGCATTTCGCAAATCATAGTAACGGAAATGAATATTACCAAGAGCACCATAAAGACTGTTAATGAGAATTT   |                       |                       |                       |                       |                       |                       |                       |                       |                       |
|                                          | (1)     | -----                                                                                              |                       |                       |                       |                       |                       |                       |                       |                       |                       |

## SARS-CoV-2 &amp; T4.apr

|                                          |                |                                                                                                    |                       |                       |                       |                       |                       |                       |                       |                       |                       |
|------------------------------------------|----------------|----------------------------------------------------------------------------------------------------|-----------------------|-----------------------|-----------------------|-----------------------|-----------------------|-----------------------|-----------------------|-----------------------|-----------------------|
|                                          |                | Section 295                                                                                        |                       |                       |                       |                       |                       |                       |                       |                       |                       |
| T4 NC 000866.4<br>SARS-CoV-2 NC_045512.2 | (28225)        | <a href="#">28225</a>                                                                              | <a href="#">28237</a> | <a href="#">28248</a> | <a href="#">28259</a> | <a href="#">28270</a> | <a href="#">28281</a> | <a href="#">28292</a> | <a href="#">28303</a> | <a href="#">28320</a> |                       |
|                                          | (28225)<br>(1) | TACGGTTCAGCTGATTTGTATTAGCAAGTGTAGCTGCTTTTTTCACATTCTTCAATCAGACTATTGAGAACAGATTTCGGTGTAATTCGATAGTTCAT |                       |                       |                       |                       |                       |                       |                       |                       |                       |
|                                          |                | Section 296                                                                                        |                       |                       |                       |                       |                       |                       |                       |                       |                       |
| T4 NC 000866.4<br>SARS-CoV-2 NC_045512.2 | (28321)        | <a href="#">28321</a>                                                                              | <a href="#">28336</a> | <a href="#">28347</a> | <a href="#">28358</a> | <a href="#">28369</a> | <a href="#">28380</a> | <a href="#">28391</a> | <a href="#">28402</a> | <a href="#">28416</a> |                       |
|                                          | (28321)<br>(1) | TTAAGAAATCATCACTGAACCTTAACATATCGTTCAACTTCTGGTTTAGTTGAACAAGACCCTGCGCCTTTCATAATAATCTTTTTAATAGCTTCGG  |                       |                       |                       |                       |                       |                       |                       |                       |                       |
|                                          |                | Section 297                                                                                        |                       |                       |                       |                       |                       |                       |                       |                       |                       |
| T4 NC 000866.4<br>SARS-CoV-2 NC_045512.2 | (28417)        | <a href="#">28417</a>                                                                              | <a href="#">28424</a> | <a href="#">28435</a> | <a href="#">28446</a> | <a href="#">28457</a> | <a href="#">28468</a> | <a href="#">28479</a> | <a href="#">28490</a> | <a href="#">28501</a> | <a href="#">28512</a> |
|                                          | (28417)<br>(1) | CATTCAATTTCTTCAGCGAACATTTTCTTTTCCAGTCTTTACGCTGGAAAAATACTTTAGCGATTTCTTTGGAATGATACCTTCTTGATGTTTAT    |                       |                       |                       |                       |                       |                       |                       |                       |                       |
|                                          |                | Section 298                                                                                        |                       |                       |                       |                       |                       |                       |                       |                       |                       |
| T4 NC 000866.4<br>SARS-CoV-2 NC_045512.2 | (28513)        | <a href="#">28513</a>                                                                              | <a href="#">28523</a> | <a href="#">28534</a> | <a href="#">28545</a> | <a href="#">28556</a> | <a href="#">28567</a> | <a href="#">28578</a> | <a href="#">28589</a> | <a href="#">28608</a> |                       |
|                                          | (28513)<br>(1) | CATACATCCATCCATTCGGAGAACAGAATATTCATCACTCGGTTTAGGAGCTGTTCTGCGATATATTCATGAATTGGATGAACCTTTAACTGAC     |                       |                       |                       |                       |                       |                       |                       |                       |                       |
|                                          |                | Section 299                                                                                        |                       |                       |                       |                       |                       |                       |                       |                       |                       |
| T4 NC 000866.4<br>SARS-CoV-2 NC_045512.2 | (28609)        | <a href="#">28609</a>                                                                              | <a href="#">28622</a> | <a href="#">28633</a> | <a href="#">28644</a> | <a href="#">28655</a> | <a href="#">28666</a> | <a href="#">28677</a> | <a href="#">28688</a> | <a href="#">28704</a> |                       |
|                                          | (28609)<br>(1) | CACGAATAGTTTCAGGACTAATGTTAACCTGGCGAATAATGCTCGGATACAGAGACGTCAAGTCAAACTCATAATGTATCGACGTGCAATTGGTT    |                       |                       |                       |                       |                       |                       |                       |                       |                       |
|                                          |                | Section 300                                                                                        |                       |                       |                       |                       |                       |                       |                       |                       |                       |
| T4 NC 000866.4<br>SARS-CoV-2 NC_045512.2 | (28705)        | <a href="#">28705</a>                                                                              | <a href="#">28710</a> | <a href="#">28721</a> | <a href="#">28732</a> | <a href="#">28743</a> | <a href="#">28754</a> | <a href="#">28765</a> | <a href="#">28776</a> | <a href="#">28787</a> | <a href="#">28800</a> |
|                                          | (28705)<br>(1) | TAGGTTCAAACACAAATGCACCCGGAAAACCTCTGTTTAACTGCGAACCTTGTTGAGGAATAACCTTATGTTACCTTTCAATGAGTTAAAAATAA    |                       |                       |                       |                       |                       |                       |                       |                       |                       |
|                                          |                | Section 301                                                                                        |                       |                       |                       |                       |                       |                       |                       |                       |                       |
| T4 NC 000866.4<br>SARS-CoV-2 NC_045512.2 | (28801)        | <a href="#">28801</a>                                                                              | <a href="#">28809</a> | <a href="#">28820</a> | <a href="#">28831</a> | <a href="#">28842</a> | <a href="#">28853</a> | <a href="#">28864</a> | <a href="#">28875</a> | <a href="#">28896</a> |                       |
|                                          | (28801)<br>(1) | TAGCATCCCAAGTTTTAATAGGACTCATTACACCAGAAAAAGGCATTTTAGCGTAATAAGACATACTTAAACTAGATCGATAAACCCACGAATTT    |                       |                       |                       |                       |                       |                       |                       |                       |                       |

## SARS-CoV-2 &amp; T4.apr

|                                          |                |                                                                                                    |                       |                       |                       |                       |                       |                       |                       |
|------------------------------------------|----------------|----------------------------------------------------------------------------------------------------|-----------------------|-----------------------|-----------------------|-----------------------|-----------------------|-----------------------|-----------------------|
|                                          |                | Section 302                                                                                        |                       |                       |                       |                       |                       |                       |                       |
| T4 NC 000866.4<br>SARS-CoV-2 NC_045512.2 | (28897)        | <a href="#">28897</a>                                                                              | <a href="#">28908</a> | <a href="#">28919</a> | <a href="#">28930</a> | <a href="#">28941</a> | <a href="#">28952</a> | <a href="#">28963</a> | <a href="#">28974</a> |
|                                          | (28897)<br>(1) | TATCGATTGCTTGAACCTGATTCTACGTCAATGATGTTATAACTAATGTATCGTTGATGATTAGTCTCACGAAGTTTATTAATAGGACCGTCGTATG  |                       |                       |                       |                       |                       |                       |                       |
|                                          |                | Section 303                                                                                        |                       |                       |                       |                       |                       |                       |                       |
| T4 NC 000866.4<br>SARS-CoV-2 NC_045512.2 | (28993)        | <a href="#">28993</a>                                                                              | <a href="#">29007</a> | <a href="#">29018</a> | <a href="#">29029</a> | <a href="#">29040</a> | <a href="#">29051</a> | <a href="#">29062</a> | <a href="#">29073</a> |
|                                          | (28993)<br>(1) | GTAATTTACCTTTTTTGGTTTCATGTTGAGCAACTGATTCCAAAGAGAATGACGGCAAATTAGTAAAAGCGAATTTCTTGTACAAATCTAAATAAT   |                       |                       |                       |                       |                       |                       |                       |
|                                          |                | Section 304                                                                                        |                       |                       |                       |                       |                       |                       |                       |
| T4 NC 000866.4<br>SARS-CoV-2 NC_045512.2 | (29089)        | <a href="#">29089</a>                                                                              | <a href="#">29095</a> | <a href="#">29106</a> | <a href="#">29117</a> | <a href="#">29128</a> | <a href="#">29139</a> | <a href="#">29150</a> | <a href="#">29161</a> |
|                                          | (29089)<br>(1) | CAAGAATAGATACGCCATCAATAGAAATAAATTTCTTTGCTACCGTACATATTTTGAATTAGTTTAGATTTTACCCGACCGATTGGAGAGAAACGTT  |                       |                       |                       |                       |                       |                       |                       |
|                                          |                | Section 305                                                                                        |                       |                       |                       |                       |                       |                       |                       |
| T4 NC 000866.4<br>SARS-CoV-2 NC_045512.2 | (29185)        | <a href="#">29185</a>                                                                              | <a href="#">29194</a> | <a href="#">29205</a> | <a href="#">29216</a> | <a href="#">29227</a> | <a href="#">29238</a> | <a href="#">29249</a> | <a href="#">29260</a> |
|                                          | (29185)<br>(1) | TCATACTACGTTACCCAGAATCATTTTAACACGATTTCATGATATACGGAACGTCAAACCCCTCAATATTCCAACCGTAAAAATAGCAGGTCGTT    |                       |                       |                       |                       |                       |                       |                       |
|                                          |                | Section 306                                                                                        |                       |                       |                       |                       |                       |                       |                       |
| T4 NC 000866.4<br>SARS-CoV-2 NC_045512.2 | (29281)        | <a href="#">29281</a>                                                                              | <a href="#">29293</a> | <a href="#">29304</a> | <a href="#">29315</a> | <a href="#">29326</a> | <a href="#">29337</a> | <a href="#">29348</a> | <a href="#">29359</a> |
|                                          | (29281)<br>(1) | TCTGTTCCCAAAGATTGATATATTCCATGAGCATATCACGCTCATTATCGAATGGCATATAAATTACTCGGTCAAGAATTTCTTGAGGAACCTTCAT  |                       |                       |                       |                       |                       |                       |                       |
|                                          |                | Section 307                                                                                        |                       |                       |                       |                       |                       |                       |                       |
| T4 NC 000866.4<br>SARS-CoV-2 NC_045512.2 | (29377)        | <a href="#">29377</a>                                                                              | <a href="#">29392</a> | <a href="#">29403</a> | <a href="#">29414</a> | <a href="#">29425</a> | <a href="#">29436</a> | <a href="#">29447</a> | <a href="#">29458</a> |
|                                          | (29377)<br>(1) | CACCACCTTCACAGTCAAGCTTAGCAGCTAACTTTGCATCCCATTTTGATACTGAACCGTACATTGAATTCAAAGGTGCGAAACATAAAACGAT     |                       |                       |                       |                       |                       |                       |                       |
|                                          |                | Section 308                                                                                        |                       |                       |                       |                       |                       |                       |                       |
| T4 NC 000866.4<br>SARS-CoV-2 NC_045512.2 | (29473)        | <a href="#">29473</a>                                                                              | <a href="#">29480</a> | <a href="#">29491</a> | <a href="#">29502</a> | <a href="#">29513</a> | <a href="#">29524</a> | <a href="#">29535</a> | <a href="#">29546</a> |
|                                          | (29473)<br>(1) | CGTCAATTGAATCGTAATGAGTGATAGCATCAATTTTCATATTCTGCTTTTCATTGGGTCAGGAAATTTATCACCAGTAACCTCAATGTCACAGTTAG |                       |                       |                       |                       |                       |                       |                       |

## SARS-CoV-2 &amp; T4.apr

|                                          |         |                                                                                                   |                       |                       |                       |                       |                       |                       |                       |
|------------------------------------------|---------|---------------------------------------------------------------------------------------------------|-----------------------|-----------------------|-----------------------|-----------------------|-----------------------|-----------------------|-----------------------|
|                                          |         | Section 309                                                                                       |                       |                       |                       |                       |                       |                       |                       |
| T4 NC 000866.4<br>SARS-CoV-2 NC_045512.2 | (29569) | <a href="#">29569</a>                                                                             | <a href="#">29579</a> | <a href="#">29590</a> | <a href="#">29601</a> | <a href="#">29612</a> | <a href="#">29623</a> | <a href="#">29634</a> | <a href="#">29645</a> |
|                                          | (29569) | CTACACGAACAAATTTTCGGTCATAAACAATTTCTGAACCATATGTATCACTTATATAAGCGAGTTTAAAATCGTTCATACCGAGAGCTTCGAGAC  |                       |                       |                       |                       |                       |                       |                       |
|                                          |         | -----                                                                                             |                       |                       |                       |                       |                       |                       |                       |
|                                          |         | Section 310                                                                                       |                       |                       |                       |                       |                       |                       |                       |
| T4 NC 000866.4<br>SARS-CoV-2 NC_045512.2 | (29665) | <a href="#">29665</a>                                                                             | <a href="#">29678</a> | <a href="#">29689</a> | <a href="#">29700</a> | <a href="#">29711</a> | <a href="#">29722</a> | <a href="#">29733</a> | <a href="#">29744</a> |
|                                          | (29665) | CGATGTCTTCCATTTCGCTTCATCCAATCTCGAGCATCTTTCATTGATGGAAATTTTGGAGGAGCGCAGTTTTTACCATAGATGTCTTTGTATTTTG |                       |                       |                       |                       |                       |                       |                       |
|                                          |         | -----                                                                                             |                       |                       |                       |                       |                       |                       |                       |
|                                          |         | Section 311                                                                                       |                       |                       |                       |                       |                       |                       |                       |
| T4 NC 000866.4<br>SARS-CoV-2 NC_045512.2 | (29761) | <a href="#">29761</a>                                                                             | <a href="#">29766</a> | <a href="#">29777</a> | <a href="#">29788</a> | <a href="#">29799</a> | <a href="#">29810</a> | <a href="#">29821</a> | <a href="#">29832</a> |
|                                          | (29761) | ACTCTTCCTTACAATGCCTAAACATAGTTGGAAGATATTCTACTTCACGGGTACGTTTCCTTTCCATTTTCATCAATATAACGTTCAACAATGTTAT |                       |                       |                       |                       |                       |                       |                       |
|                                          |         | -----                                                                                             |                       |                       |                       |                       |                       |                       |                       |
|                                          |         | Section 312                                                                                       |                       |                       |                       |                       |                       |                       |                       |
| T4 NC 000866.4<br>SARS-CoV-2 NC_045512.2 | (29857) | <a href="#">29857</a>                                                                             | <a href="#">29865</a> | <a href="#">29876</a> | <a href="#">29887</a> | <a href="#">29898</a> | <a href="#">29909</a> | <a href="#">29920</a> | <a href="#">29931</a> |
|                                          | (29857) | TTCCGACTGTTTCAATAGAGATATAAAATTCCTTTCATAGATATTCCTTAGTTTATAGCCCGAGTTATTAGGCTCTTGATATATTATACTCCAAATA |                       |                       |                       |                       |                       |                       |                       |
|                                          |         | -----                                                                                             |                       |                       |                       |                       |                       |                       |                       |
|                                          |         | Section 313                                                                                       |                       |                       |                       |                       |                       |                       |                       |
| T4 NC 000866.4<br>SARS-CoV-2 NC_045512.2 | (29953) | <a href="#">29953</a>                                                                             | <a href="#">29964</a> | <a href="#">29975</a> | <a href="#">29986</a> | <a href="#">29997</a> | <a href="#">30008</a> | <a href="#">30019</a> | <a href="#">30030</a> |
|                                          | (29953) | AGGGGCCGAAGCCCCCTTGCTTAATTACCAATCGTATATTTAGGAACGAGCTTCCATTTCATGTTTTTGTTTAAAGAAATAACTCGGAAGTTATTAG |                       |                       |                       |                       |                       |                       |                       |
|                                          |         | -----                                                                                             |                       |                       |                       |                       |                       |                       |                       |
|                                          |         | Section 314                                                                                       |                       |                       |                       |                       |                       |                       |                       |
| T4 NC 000866.4<br>SARS-CoV-2 NC_045512.2 | (30049) | <a href="#">30049</a>                                                                             | <a href="#">30063</a> | <a href="#">30074</a> | <a href="#">30085</a> | <a href="#">30096</a> | <a href="#">30107</a> | <a href="#">30118</a> | <a href="#">30129</a> |
|                                          | (30049) | TTAAATCTTTCATAAAAGTTCTTTGACCAGGAACGATTTCAATTAGTCCCCAATCTTCTAATAGCCATGCAATCGAATCACGACGAACCTTCATCTT |                       |                       |                       |                       |                       |                       |                       |
|                                          |         | -----                                                                                             |                       |                       |                       |                       |                       |                       |                       |
|                                          |         | Section 315                                                                                       |                       |                       |                       |                       |                       |                       |                       |
| T4 NC 000866.4<br>SARS-CoV-2 NC_045512.2 | (30145) | <a href="#">30145</a>                                                                             | <a href="#">30151</a> | <a href="#">30162</a> | <a href="#">30173</a> | <a href="#">30184</a> | <a href="#">30195</a> | <a href="#">30206</a> | <a href="#">30217</a> |
|                                          | (30145) | CTTCTGTCAATTTCAACTTGACGACCATCCATACGAAGCATTCTTTTAAATGAACGATATAGTATAGTCCTTTTTTCTGAAGAATATGACAGGACT  |                       |                       |                       |                       |                       |                       |                       |
|                                          |         | -----                                                                                             |                       |                       |                       |                       |                       |                       |                       |

## SARS-CoV-2 &amp; T4.apr

|                                          |         |                                                                                                   |       |       |       |       |       |       |       |       |       |
|------------------------------------------|---------|---------------------------------------------------------------------------------------------------|-------|-------|-------|-------|-------|-------|-------|-------|-------|
|                                          |         | Section 316                                                                                       |       |       |       |       |       |       |       |       |       |
| T4 NC 000866.4<br>SARS-CoV-2 NC_045512.2 | (30241) | 30241                                                                                             | 30250 | 30261 | 30272 | 30283 | 30294 | 30305 | 30316 | 30336 |       |
|                                          | (30241) | GATATAGAACTTTATCTTTATTATTAGCAATTCCCATACGAGTCAAAGTTTCTTTTACTTTTCAGAAAATCTTCAGGTTTTTTAAGAGTAATTTCAA |       |       |       |       |       |       |       |       |       |
|                                          | (1)     | -----                                                                                             |       |       |       |       |       |       |       |       |       |
|                                          |         | Section 317                                                                                       |       |       |       |       |       |       |       |       |       |
| T4 NC 000866.4<br>SARS-CoV-2 NC_045512.2 | (30337) | 30337                                                                                             | 30349 | 30360 | 30371 | 30382 | 30393 | 30404 | 30415 | 30432 |       |
|                                          | (30337) | TCATTTTACCATTCCAATGCTAGTTTTTTGAGTTGTTTCTGTTCTTTTACGTTCTTAGTCACTTCTTTCAAAAAATCATCCGTGACTAAACCTTTT  |       |       |       |       |       |       |       |       |       |
|                                          | (1)     | -----                                                                                             |       |       |       |       |       |       |       |       |       |
|                                          |         | Section 318                                                                                       |       |       |       |       |       |       |       |       |       |
| T4 NC 000866.4<br>SARS-CoV-2 NC_045512.2 | (30433) | 30433                                                                                             | 30448 | 30459 | 30470 | 30481 | 30492 | 30503 | 30514 | 30528 |       |
|                                          | (30433) | AGTTCTTTTAATACTAAAGGAAGTTTTCCATTTTGTAGTAAGAATTGATTTATAGTTAATTGCATCATTTGTATTAACTTGATACCGCTTAGCAAGT |       |       |       |       |       |       |       |       |       |
|                                          | (1)     | -----                                                                                             |       |       |       |       |       |       |       |       |       |
|                                          |         | Section 319                                                                                       |       |       |       |       |       |       |       |       |       |
| T4 NC 000866.4<br>SARS-CoV-2 NC_045512.2 | (30529) | 30529                                                                                             | 30536 | 30547 | 30558 | 30569 | 30580 | 30591 | 30602 | 30613 | 30624 |
|                                          | (30529) | AACTTAATAATCAATACTTCGGTGGAATCTTCAACCAGTTTTGCCCATTTACCATATCTTTTACCACGAGGAAGTGCAGCCATTAGATAATTAAAA  |       |       |       |       |       |       |       |       |       |
|                                          | (1)     | -----                                                                                             |       |       |       |       |       |       |       |       |       |
|                                          |         | Section 320                                                                                       |       |       |       |       |       |       |       |       |       |
| T4 NC 000866.4<br>SARS-CoV-2 NC_045512.2 | (30625) | 30625                                                                                             | 30635 | 30646 | 30657 | 30668 | 30679 | 30690 | 30701 | 30720 |       |
|                                          | (30625) | TGAGCTTCATCACTTAAGCCTGATCCAATTAAATTCATAGCATATACAGCTGGCATACACTCTGGAAATTGTGATAATGCATTTTCAACCATGAAT  |       |       |       |       |       |       |       |       |       |
|                                          | (1)     | -----                                                                                             |       |       |       |       |       |       |       |       |       |
|                                          |         | Section 321                                                                                       |       |       |       |       |       |       |       |       |       |
| T4 NC 000866.4<br>SARS-CoV-2 NC_045512.2 | (30721) | 30721                                                                                             | 30734 | 30745 | 30756 | 30767 | 30778 | 30789 | 30800 | 30816 |       |
|                                          | (30721) | TTTGAATAATCTTTTTGAGCAATAGAGCATTTAGTTTTATTATTAATAGCTCCAATTATTTCAAAAAATTCATTTTCTGCTTTTTCTTTAAAAGAA  |       |       |       |       |       |       |       |       |       |
|                                          | (1)     | -----                                                                                             |       |       |       |       |       |       |       |       |       |
|                                          |         | Section 322                                                                                       |       |       |       |       |       |       |       |       |       |
| T4 NC 000866.4<br>SARS-CoV-2 NC_045512.2 | (30817) | 30817                                                                                             | 30822 | 30833 | 30844 | 30855 | 30866 | 30877 | 30888 | 30899 | 30912 |
|                                          | (30817) | TCAGCAGCGGATTGGACAGCTGTCCAATCTTTTGAATACCAAGCAACTTGATGCTCGTTTAAATTGAATATCATCTTTAAATAAGCTCATATCACTT |       |       |       |       |       |       |       |       |       |
|                                          | (1)     | -----                                                                                             |       |       |       |       |       |       |       |       |       |

## SARS-CoV-2 &amp; T4.apr

|                                          |         |                                                                                                   |       |       |       |       |       |       |       |
|------------------------------------------|---------|---------------------------------------------------------------------------------------------------|-------|-------|-------|-------|-------|-------|-------|
|                                          |         | Section 323                                                                                       |       |       |       |       |       |       |       |
| T4 NC 000866.4<br>SARS-CoV-2 NC_045512.2 | (30913) | 30913                                                                                             | 30921 | 30932 | 30943 | 30954 | 30965 | 30976 | 30987 |
|                                          | (30913) | CCACTGCATTTTCGCATGCTAATTGAATGAAAAGATAAGCTAAATGCAATTCAGTATTAGCTGCAATACCATGATACTGATTATTTTCGCCGACAAT |       |       |       |       |       |       |       |
|                                          |         | Section 324                                                                                       |       |       |       |       |       |       |       |
| T4 NC 000866.4<br>SARS-CoV-2 NC_045512.2 | (31009) | 31009                                                                                             | 31020 | 31031 | 31042 | 31053 | 31064 | 31075 | 31086 |
|                                          | (31009) | TTCGTACATACGAATAATACTTTGTGGAGTTACACGTGAATAGATTTCTTCGGCAAGTTTACCCACGAACCACGAATAATCAGCCGCATATTTTGG  |       |       |       |       |       |       |       |
|                                          |         | Section 325                                                                                       |       |       |       |       |       |       |       |
| T4 NC 000866.4<br>SARS-CoV-2 NC_045512.2 | (31105) | 31105                                                                                             | 31119 | 31130 | 31141 | 31152 | 31163 | 31174 | 31185 |
|                                          | (31105) | TGCTAAAGCTCTGAGTTGTTTAACATCTTTATTTTGTAGAGACTCAAGAACATCATCAATAGCACCACGATCGTTAGTAACCAGTGATAAAATACC  |       |       |       |       |       |       |       |
|                                          |         | Section 326                                                                                       |       |       |       |       |       |       |       |
| T4 NC 000866.4<br>SARS-CoV-2 NC_045512.2 | (31201) | 31201                                                                                             | 31207 | 31218 | 31229 | 31240 | 31251 | 31262 | 31273 |
|                                          | (31201) | AGCATCCAAAACACCTTTAGACGAATAACTATCGAGCTCGCCAATAGTTTTACGAAAATCAGGAAAATTCTTTTTAACCAAAGCTGCTACAACCTTT |       |       |       |       |       |       |       |
|                                          |         | Section 327                                                                                       |       |       |       |       |       |       |       |
| T4 NC 000866.4<br>SARS-CoV-2 NC_045512.2 | (31297) | 31297                                                                                             | 31306 | 31317 | 31328 | 31339 | 31350 | 31361 | 31372 |
|                                          | (31297) | CATATCAGCTATAGCAATTCCTTCATGCTTGCAGATTTTCAGTCAATCGACGAATCATCTGCTTCATCATTTCAATTTTATCTTCATCAGTTGGTTG |       |       |       |       |       |       |       |
|                                          |         | Section 328                                                                                       |       |       |       |       |       |       |       |
| T4 NC 000866.4<br>SARS-CoV-2 NC_045512.2 | (31393) | 31393                                                                                             | 31405 | 31416 | 31427 | 31438 | 31449 | 31460 | 31471 |
|                                          | (31393) | ACCGAATGTAATAACTCGGCAGCGTGACTGAAGCGGTTTAATAATACCATCAATATTATTAGCAGTAATAATAATACTACAGTTTGAACTATAAGC  |       |       |       |       |       |       |       |
|                                          |         | Section 329                                                                                       |       |       |       |       |       |       |       |
| T4 NC 000866.4<br>SARS-CoV-2 NC_045512.2 | (31489) | 31489                                                                                             | 31504 | 31515 | 31526 | 31537 | 31548 | 31559 | 31570 |
|                                          | (31489) | TTCCATAAAGGAACGAAGATGTCGCTGAGACTCTGCTAACCTGAACGGTCAAATTCATCAATAACGATTACTTTTTGACGACCATCAAATGAAGC   |       |       |       |       |       |       |       |

## SARS-CoV-2 &amp; T4.apr

|                        |         |                                                                                                     |       |       |       |       |       |       |       |       |       |
|------------------------|---------|-----------------------------------------------------------------------------------------------------|-------|-------|-------|-------|-------|-------|-------|-------|-------|
|                        |         | Section 330                                                                                         |       |       |       |       |       |       |       |       |       |
| T4 NC 000866.4         | (31585) | 31585                                                                                               | 31592 | 31603 | 31614 | 31625 | 31636 | 31647 | 31658 | 31669 | 31680 |
| SARS-CoV-2 NC_045512.2 | (31585) | GGCGCTGGCAAAATTAGTCAAAGGACCACGAACGAAATCAATTTTACAATCTGACCCATTACAAAACATCATATCAGCATTTACATCATGACATAA    |       |       |       |       |       |       |       |       |       |
|                        |         | (1) -----                                                                                           |       |       |       |       |       |       |       |       |       |
|                        |         | Section 331                                                                                         |       |       |       |       |       |       |       |       |       |
| T4 NC 000866.4         | (31681) | 31681                                                                                               | 31691 | 31702 | 31713 | 31724 | 31735 | 31746 | 31757 | 31776 |       |
| SARS-CoV-2 NC_045512.2 | (31681) | TGCTTTTGCTACAGTTGTTTTACCTGTTCTGGAGAAGGAGAATGAAGAATAATATGTGGAATCTTACCTTTACTTGTAATAGATTTAAAGGTTTC     |       |       |       |       |       |       |       |       |       |
|                        |         | (1) -----                                                                                           |       |       |       |       |       |       |       |       |       |
|                        |         | Section 332                                                                                         |       |       |       |       |       |       |       |       |       |
| T4 NC 000866.4         | (31777) | 31777                                                                                               | 31790 | 31801 | 31812 | 31823 | 31834 | 31845 | 31856 | 31872 |       |
| SARS-CoV-2 NC_045512.2 | (31777) | TTTATCAAAAAGCGGGAAGAATACATTCATCGATAGTAGATGGACGATATTTCTGTTCAAGAATGTGTTCTTTTTTCATTTACAGTAATCATAATTTTC |       |       |       |       |       |       |       |       |       |
|                        |         | (1) -----                                                                                           |       |       |       |       |       |       |       |       |       |
|                        |         | Section 333                                                                                         |       |       |       |       |       |       |       |       |       |
| T4 NC 000866.4         | (31873) | 31873                                                                                               | 31878 | 31889 | 31900 | 31911 | 31922 | 31933 | 31944 | 31955 | 31968 |
| SARS-CoV-2 NC_045512.2 | (31873) | CTCATTCAAGTTTTAGTGTAATTATAAAGGCCGAAGCCCTCTATTAAAAATCGTGGGTAGAATCAGCTTCAAGAGCTACCACATAATTCGCGTGT     |       |       |       |       |       |       |       |       |       |
|                        |         | (1) -----                                                                                           |       |       |       |       |       |       |       |       |       |
|                        |         | Section 334                                                                                         |       |       |       |       |       |       |       |       |       |
| T4 NC 000866.4         | (31969) | 31969                                                                                               | 31977 | 31988 | 31999 | 32010 | 32021 | 32032 | 32043 | 32064 |       |
| SARS-CoV-2 NC_045512.2 | (31969) | TCACCTTCAAATTTAGCAGCACCTTGTTTACCTTTTGCCCAAAGCAGAAGTTTATAATTTCTGTTGTCATTTTCATATTTGCCATATTGATAATG     |       |       |       |       |       |       |       |       |       |
|                        |         | (1) -----                                                                                           |       |       |       |       |       |       |       |       |       |
|                        |         | Section 335                                                                                         |       |       |       |       |       |       |       |       |       |
| T4 NC 000866.4         | (32065) | 32065                                                                                               | 32076 | 32087 | 32098 | 32109 | 32120 | 32131 | 32142 | 32160 |       |
| SARS-CoV-2 NC_045512.2 | (32065) | AAATTAAATGTATTTTACCATCATAATCACCAAGAGTCAAAGAATATTTAACACGGGTCAGAGCAGAATCTTCTACTTTATTAAAACCGTTAATT     |       |       |       |       |       |       |       |       |       |
|                        |         | (1) -----                                                                                           |       |       |       |       |       |       |       |       |       |
|                        |         | Section 336                                                                                         |       |       |       |       |       |       |       |       |       |
| T4 NC 000866.4         | (32161) | 32161                                                                                               | 32175 | 32186 | 32197 | 32208 | 32219 | 32230 | 32241 | 32256 |       |
| SARS-CoV-2 NC_045512.2 | (32161) | ACGATTTTACCTTCTTTTACCGTGATAGCAATTGTATCAATTTGCAGACCACGAGATACACGCAACAGCTGTTGAAGGTCTTCAGCTTTAATTTCA    |       |       |       |       |       |       |       |       |       |
|                        |         | (1) -----                                                                                           |       |       |       |       |       |       |       |       |       |



## SARS-CoV-2 &amp; T4.apr

|                                          |         |                                                                                                    |                       |                       |                       |                       |                       |                       |                       |                       |                       |
|------------------------------------------|---------|----------------------------------------------------------------------------------------------------|-----------------------|-----------------------|-----------------------|-----------------------|-----------------------|-----------------------|-----------------------|-----------------------|-----------------------|
| Section 337                              |         |                                                                                                    |                       |                       |                       |                       |                       |                       |                       |                       |                       |
| T4 NC 000866.4<br>SARS-CoV-2 NC_045512.2 | (32257) | <a href="#">32257</a>                                                                              | <a href="#">32263</a> | <a href="#">32274</a> | <a href="#">32285</a> | <a href="#">32296</a> | <a href="#">32307</a> | <a href="#">32318</a> | <a href="#">32329</a> | <a href="#">32340</a> | <a href="#">32352</a> |
|                                          | (32257) | GTAACAGCAGATGCTACCGGGAATGGAATTGGTTTATTAGGAGCAACTACTGTACTCGGATCGGCTGCTGGCCAAAAAATTGTTGAGCGGGCATCA   |                       |                       |                       |                       |                       |                       |                       |                       |                       |
|                                          | (1)     | -----                                                                                              |                       |                       |                       |                       |                       |                       |                       |                       |                       |
| Section 338                              |         |                                                                                                    |                       |                       |                       |                       |                       |                       |                       |                       |                       |
| T4 NC 000866.4<br>SARS-CoV-2 NC_045512.2 | (32353) | <a href="#">32353</a>                                                                              | <a href="#">32362</a> | <a href="#">32373</a> | <a href="#">32384</a> | <a href="#">32395</a> | <a href="#">32406</a> | <a href="#">32417</a> | <a href="#">32428</a> | <a href="#">32448</a> |                       |
|                                          | (32353) | GCAATTTTAATATTTCCATCTTCTGACTGGGAAATTTCTGCATCATCATTAACTAAAGACAGAATACCGAGAAAACCGTTCAAATCGTAAATTGCT   |                       |                       |                       |                       |                       |                       |                       |                       |                       |
|                                          | (1)     | -----                                                                                              |                       |                       |                       |                       |                       |                       |                       |                       |                       |
| Section 339                              |         |                                                                                                    |                       |                       |                       |                       |                       |                       |                       |                       |                       |
| T4 NC 000866.4<br>SARS-CoV-2 NC_045512.2 | (32449) | <a href="#">32449</a>                                                                              | <a href="#">32461</a> | <a href="#">32472</a> | <a href="#">32483</a> | <a href="#">32494</a> | <a href="#">32505</a> | <a href="#">32516</a> | <a href="#">32527</a> | <a href="#">32544</a> |                       |
|                                          | (32449) | ACATCAAAATCAATAACGTCAGAAATATTTGCTTCCGCATAAGTTGTACCATTAAGTGCAGAGTCATAATAAATTGACCGGATTTAAGCATAATA    |                       |                       |                       |                       |                       |                       |                       |                       |                       |
|                                          | (1)     | -----                                                                                              |                       |                       |                       |                       |                       |                       |                       |                       |                       |
| Section 340                              |         |                                                                                                    |                       |                       |                       |                       |                       |                       |                       |                       |                       |
| T4 NC 000866.4<br>SARS-CoV-2 NC_045512.2 | (32545) | <a href="#">32545</a>                                                                              | <a href="#">32560</a> | <a href="#">32571</a> | <a href="#">32582</a> | <a href="#">32593</a> | <a href="#">32604</a> | <a href="#">32615</a> | <a href="#">32626</a> | <a href="#">32640</a> |                       |
|                                          | (32545) | CCAGAGTTAATAGTAGCGAAATTTTAAAGCAGAGCAGTAGTATCTTTAGACAGTTTCATGTAATTTCTTCAATTCAAATGAGATTTAATTTTATA    |                       |                       |                       |                       |                       |                       |                       |                       |                       |
|                                          | (1)     | -----                                                                                              |                       |                       |                       |                       |                       |                       |                       |                       |                       |
| Section 341                              |         |                                                                                                    |                       |                       |                       |                       |                       |                       |                       |                       |                       |
| T4 NC 000866.4<br>SARS-CoV-2 NC_045512.2 | (32641) | <a href="#">32641</a>                                                                              | <a href="#">32648</a> | <a href="#">32659</a> | <a href="#">32670</a> | <a href="#">32681</a> | <a href="#">32692</a> | <a href="#">32703</a> | <a href="#">32714</a> | <a href="#">32725</a> | <a href="#">32736</a> |
|                                          | (32641) | ACTAATTTAATAAAGCAATTAACGATTAAAAATCAGCCGCAATTGTTTCCGCAACAATTTGAGCAGCAACAATTAGACGTTTCATCTGCATTACCGCA |                       |                       |                       |                       |                       |                       |                       |                       |                       |
|                                          | (1)     | -----                                                                                              |                       |                       |                       |                       |                       |                       |                       |                       |                       |
| Section 342                              |         |                                                                                                    |                       |                       |                       |                       |                       |                       |                       |                       |                       |
| T4 NC 000866.4<br>SARS-CoV-2 NC_045512.2 | (32737) | <a href="#">32737</a>                                                                              | <a href="#">32747</a> | <a href="#">32758</a> | <a href="#">32769</a> | <a href="#">32780</a> | <a href="#">32791</a> | <a href="#">32802</a> | <a href="#">32813</a> | <a href="#">32832</a> |                       |
|                                          | (32737) | ATAATCATCTTCAAGGCGTTCACCACATGAAGTCATAATAAATTTAGCACCGGCGTTTAGGGATTCTGTAGTATGTTTGCGCATTAGTTCAATCCA   |                       |                       |                       |                       |                       |                       |                       |                       |                       |
|                                          | (1)     | -----                                                                                              |                       |                       |                       |                       |                       |                       |                       |                       |                       |
| Section 343                              |         |                                                                                                    |                       |                       |                       |                       |                       |                       |                       |                       |                       |
| T4 NC 000866.4<br>SARS-CoV-2 NC_045512.2 | (32833) | <a href="#">32833</a>                                                                              | <a href="#">32846</a> | <a href="#">32857</a> | <a href="#">32868</a> | <a href="#">32879</a> | <a href="#">32890</a> | <a href="#">32901</a> | <a href="#">32912</a> | <a href="#">32928</a> |                       |
|                                          | (32833) | TTTATTACTTACTTCACGATCGATAGCTTCATAATACGCATGACGAGCAGGTGCAGATTTAATTTTGTTCTGAATAACTTCCATTGCGTTATCAGA   |                       |                       |                       |                       |                       |                       |                       |                       |                       |
|                                          | (1)     | -----                                                                                              |                       |                       |                       |                       |                       |                       |                       |                       |                       |

## SARS-CoV-2 &amp; T4.apr

|                                          |                |                                                                                                            |                       |                       |                       |                       |                       |                       |                       |                       |                       |
|------------------------------------------|----------------|------------------------------------------------------------------------------------------------------------|-----------------------|-----------------------|-----------------------|-----------------------|-----------------------|-----------------------|-----------------------|-----------------------|-----------------------|
|                                          |                | Section 344                                                                                                |                       |                       |                       |                       |                       |                       |                       |                       |                       |
| T4 NC 000866.4<br>SARS-CoV-2 NC_045512.2 | (32929)        | <a href="#">32929</a>                                                                                      | <a href="#">32934</a> | <a href="#">32945</a> | <a href="#">32956</a> | <a href="#">32967</a> | <a href="#">32978</a> | <a href="#">32989</a> | <a href="#">33000</a> | <a href="#">33011</a> | <a href="#">33024</a> |
|                                          | (32929)<br>(1) | AAGAGACAAAACCCATGCTCGACGAATTTTATTTTGGTTTTGTGGATTGATTCAGAACGCACGTGTTTTGGCTGAATATCTTTTACATCAACAGT<br>-----   |                       |                       |                       |                       |                       |                       |                       |                       |                       |
|                                          |                | Section 345                                                                                                |                       |                       |                       |                       |                       |                       |                       |                       |                       |
| T4 NC 000866.4<br>SARS-CoV-2 NC_045512.2 | (33025)        | <a href="#">33025</a>                                                                                      | <a href="#">33033</a> | <a href="#">33044</a> | <a href="#">33055</a> | <a href="#">33066</a> | <a href="#">33077</a> | <a href="#">33088</a> | <a href="#">33099</a> |                       | <a href="#">33120</a> |
|                                          | (33025)<br>(1) | ATAATTACACAGTAATTTTAGTCATAATACACCTTTAGTCATAATAATCAGTAACAGTCCAAGCTTCATTTCTATTGGACATTATTTTTGTATATTC<br>----- |                       |                       |                       |                       |                       |                       |                       |                       |                       |
|                                          |                | Section 346                                                                                                |                       |                       |                       |                       |                       |                       |                       |                       |                       |
| T4 NC 000866.4<br>SARS-CoV-2 NC_045512.2 | (33121)        | <a href="#">33121</a>                                                                                      | <a href="#">33132</a> | <a href="#">33143</a> | <a href="#">33154</a> | <a href="#">33165</a> | <a href="#">33176</a> | <a href="#">33187</a> | <a href="#">33198</a> |                       | <a href="#">33216</a> |
|                                          | (33121)<br>(1) | TGCTTTAAATGCATTCCTAAGCATAGATTACAGTAACATATGCTCTTCATTAGAAAAATTATTTCTCAGAATATATCGTTTTATTTTCAGGAATAGT<br>----- |                       |                       |                       |                       |                       |                       |                       |                       |                       |
|                                          |                | Section 347                                                                                                |                       |                       |                       |                       |                       |                       |                       |                       |                       |
| T4 NC 000866.4<br>SARS-CoV-2 NC_045512.2 | (33217)        | <a href="#">33217</a>                                                                                      | <a href="#">33231</a> | <a href="#">33242</a> | <a href="#">33253</a> | <a href="#">33264</a> | <a href="#">33275</a> | <a href="#">33286</a> | <a href="#">33297</a> |                       | <a href="#">33312</a> |
|                                          | (33217)<br>(1) | TAATAGATGCTGTCCAGTTGAATATTCCATGTTTTCTCCATAGAGATTATACTCTAATAAATTAAAGCATAATCTCTTATAAATTAAACCATTA<br>-----    |                       |                       |                       |                       |                       |                       |                       |                       |                       |
|                                          |                | Section 348                                                                                                |                       |                       |                       |                       |                       |                       |                       |                       |                       |
| T4 NC 000866.4<br>SARS-CoV-2 NC_045512.2 | (33313)        | <a href="#">33313</a>                                                                                      | <a href="#">33319</a> | <a href="#">33330</a> | <a href="#">33341</a> | <a href="#">33352</a> | <a href="#">33363</a> | <a href="#">33374</a> | <a href="#">33385</a> | <a href="#">33396</a> | <a href="#">33408</a> |
|                                          | (33313)<br>(1) | CAGTAAATCGACCAACTTTCTTCATTTGAAGATGCTGACCATATTCTTGCGGGTCATGGTCTTTATGCGAAATTATAAAAACGTTAGTGTTTTTCA<br>-----  |                       |                       |                       |                       |                       |                       |                       |                       |                       |
|                                          |                | Section 349                                                                                                |                       |                       |                       |                       |                       |                       |                       |                       |                       |
| T4 NC 000866.4<br>SARS-CoV-2 NC_045512.2 | (33409)        | <a href="#">33409</a>                                                                                      | <a href="#">33418</a> | <a href="#">33429</a> | <a href="#">33440</a> | <a href="#">33451</a> | <a href="#">33462</a> | <a href="#">33473</a> | <a href="#">33484</a> |                       | <a href="#">33504</a> |
|                                          | (33409)<br>(1) | TTGAATTTATAATATTAGCTACACCTTTAATACCTTCGGCATCAAATGACCCATCAAACACTTCATCAAGAATTAATGTACTAATACTAACACCAG<br>-----  |                       |                       |                       |                       |                       |                       |                       |                       |                       |
|                                          |                | Section 350                                                                                                |                       |                       |                       |                       |                       |                       |                       |                       |                       |
| T4 NC 000866.4<br>SARS-CoV-2 NC_045512.2 | (33505)        | <a href="#">33505</a>                                                                                      | <a href="#">33517</a> | <a href="#">33528</a> | <a href="#">33539</a> | <a href="#">33550</a> | <a href="#">33561</a> | <a href="#">33572</a> | <a href="#">33583</a> |                       | <a href="#">33600</a> |
|                                          | (33505)<br>(1) | ATACGATAGAAGCAATATCACGCCAAGTAAATAAAAGAGCAATATCGATTTCGTGCCTTTTCACCTTCACTAAATGAAGCATAACTAAAATCTTCAC<br>----- |                       |                       |                       |                       |                       |                       |                       |                       |                       |

## SARS-CoV-2 &amp; T4.apr

|                                          |         |                                                                                                    |       |       |       |       |       |       |       |
|------------------------------------------|---------|----------------------------------------------------------------------------------------------------|-------|-------|-------|-------|-------|-------|-------|
|                                          |         | Section 351                                                                                        |       |       |       |       |       |       |       |
| T4 NC 000866.4<br>SARS-CoV-2 NC_045512.2 | (33601) | 33601                                                                                              | 33616 | 33627 | 33638 | 33649 | 33660 | 33671 | 33682 |
|                                          | (33601) | GACCACGGGATTTAATTGTCTCATTAATAATTCTTCATCTAATGTAAACACATAATCCGCTTCCATTATTTTAAGATAATGGTTAATCTGCTTATTAA |       |       |       |       |       |       |       |
|                                          |         | Section 352                                                                                        |       |       |       |       |       |       |       |
| T4 NC 000866.4<br>SARS-CoV-2 NC_045512.2 | (33697) | 33697                                                                                              | 33704 | 33715 | 33726 | 33737 | 33748 | 33759 | 33770 |
|                                          | (33697) | ATAATGGAATGTACTTTTAAATAATAGCACCTTTAATACCAGAATCTTTGAGCATATCAGTCAAAATTCCTCGGTGGTATTTTTCCATTACTAAAT   |       |       |       |       |       |       |       |
|                                          |         | Section 353                                                                                        |       |       |       |       |       |       |       |
| T4 NC 000866.4<br>SARS-CoV-2 NC_045512.2 | (33793) | 33793                                                                                              | 33803 | 33814 | 33825 | 33836 | 33847 | 33858 | 33869 |
|                                          | (33793) | TAGTTTTTGTCTTAACAATTTTATCAAGTTCTTCTTGAAGCAGTGCTATTTTCATCAGCATGGTCAATAAACTCAGAAGATGCTTTTTCTATAGCCG  |       |       |       |       |       |       |       |
|                                          |         | Section 354                                                                                        |       |       |       |       |       |       |       |
| T4 NC 000866.4<br>SARS-CoV-2 NC_045512.2 | (33889) | 33889                                                                                              | 33902 | 33913 | 33924 | 33935 | 33946 | 33957 | 33968 |
|                                          | (33889) | CTTTAACTTTTTTAGCTTTATCTACTGCTGCGATCAGAGATTGCTTTTTATTGCGAATATCATTTGCCAACGACTGCTGGGTTTTAATATTATCTC   |       |       |       |       |       |       |       |
|                                          |         | Section 355                                                                                        |       |       |       |       |       |       |       |
| T4 NC 000866.4<br>SARS-CoV-2 NC_045512.2 | (33985) | 33985                                                                                              | 33990 | 34001 | 34012 | 34023 | 34034 | 34045 | 34056 |
|                                          | (33985) | GGTATTCATCAACAAGAAGCTTTTAAATTATCACGATGTGTTGAAAGCTGTTCAAACGAATGTGTGCATTGAGAACTTTATCTTTAATTTTAGAAA   |       |       |       |       |       |       |       |
|                                          |         | Section 356                                                                                        |       |       |       |       |       |       |       |
| T4 NC 000866.4<br>SARS-CoV-2 NC_045512.2 | (34081) | 34081                                                                                              | 34089 | 34100 | 34111 | 34122 | 34133 | 34144 | 34155 |
|                                          | (34081) | CAACTTTATCACCGGAACTCAATTGTGACAAACAGGTTGGACATAATCCACCTTCGTGATACATATTAATGACTTTATTATACGAGTCAATTTTTG   |       |       |       |       |       |       |       |
|                                          |         | Section 357                                                                                        |       |       |       |       |       |       |       |
| T4 NC 000866.4<br>SARS-CoV-2 NC_045512.2 | (34177) | 34177                                                                                              | 34188 | 34199 | 34210 | 34221 | 34232 | 34243 | 34254 |
|                                          | (34177) | ATTTAATTAAAAATGCTTCTTGACCGATTTTATTAAATGCATCAGTCGGGTCTTCGTCCAAAACAATATTAATAATCTTTTCGTTAGCTTCTTCTA   |       |       |       |       |       |       |       |

## SARS-CoV-2 &amp; T4.apr

|                                          |         |                                                                                                    |       |       |       |       |       |       |       |
|------------------------------------------|---------|----------------------------------------------------------------------------------------------------|-------|-------|-------|-------|-------|-------|-------|
|                                          |         | Section 358                                                                                        |       |       |       |       |       |       |       |
| T4 NC 000866.4<br>SARS-CoV-2 NC_045512.2 | (34273) | 34273                                                                                              | 34287 | 34298 | 34309 | 34320 | 34331 | 34342 | 34353 |
|                                          | (34273) | TTTCCGATTTTGTAGCGTTCTAGCTTCTTTTGCCAAATCATCATACATATTTTGTAGACGAGTAAGGTTGTCACCCGTTAATTTTTCTGGCGTTCAA  |       |       |       |       |       |       |       |
|                                          | (1)     | -----                                                                                              |       |       |       |       |       |       |       |
|                                          |         | Section 359                                                                                        |       |       |       |       |       |       |       |
| T4 NC 000866.4<br>SARS-CoV-2 NC_045512.2 | (34369) | 34369                                                                                              | 34375 | 34386 | 34397 | 34408 | 34419 | 34430 | 34441 |
|                                          | (34369) | CATTATCATTATATATTTTAATTTGTTGGATAATACTATCTTTTTTAACATCAAGCACTTGGTTCTGCGAATTTAATTCACGTATTAGTGCTTTAT   |       |       |       |       |       |       |       |
|                                          | (1)     | -----                                                                                              |       |       |       |       |       |       |       |
|                                          |         | Section 360                                                                                        |       |       |       |       |       |       |       |
| T4 NC 000866.4<br>SARS-CoV-2 NC_045512.2 | (34465) | 34465                                                                                              | 34474 | 34485 | 34496 | 34507 | 34518 | 34529 | 34540 |
|                                          | (34465) | TAAGCTTATCCATTTTCAGCTAATGTTCTCTACCTCAAGCAGGTCTTCCACAAGCTTTCTTCGCGCAGGGGTCGACAAACCCATGAAAGGGGTATACC |       |       |       |       |       |       |       |
|                                          | (1)     | -----                                                                                              |       |       |       |       |       |       |       |
|                                          |         | Section 361                                                                                        |       |       |       |       |       |       |       |
| T4 NC 000866.4<br>SARS-CoV-2 NC_045512.2 | (34561) | 34561                                                                                              | 34573 | 34584 | 34595 | 34606 | 34617 | 34628 | 34639 |
|                                          | (34561) | CTGCTGTACCAAGGACAACAATCTGCTTGAACTGGCATATGACATTCCGATAAGCTGTTCAAATCTGCTTGGAATCTTTACTGCTGGCAGATT      |       |       |       |       |       |       |       |
|                                          | (1)     | -----                                                                                              |       |       |       |       |       |       |       |
|                                          |         | Section 362                                                                                        |       |       |       |       |       |       |       |
| T4 NC 000866.4<br>SARS-CoV-2 NC_045512.2 | (34657) | 34657                                                                                              | 34672 | 34683 | 34694 | 34705 | 34716 | 34727 | 34738 |
|                                          | (34657) | CATTAAGACGTGTACCGTTAACGGTGATTTGAAAAAGTTTGGTTTTGTCTCTTTTGATATAGTACTTTTTCTCATCATATTCCATCCACAGTT      |       |       |       |       |       |       |       |
|                                          | (1)     | -----                                                                                              |       |       |       |       |       |       |       |
|                                          |         | Section 363                                                                                        |       |       |       |       |       |       |       |
| T4 NC 000866.4<br>SARS-CoV-2 NC_045512.2 | (34753) | 34753                                                                                              | 34760 | 34771 | 34782 | 34793 | 34804 | 34815 | 34826 |
|                                          | (34753) | CAACTAAAAGTTCTTTCTTATTTGTGCTGTTTATTAATTGACCTTTCTTTACATCGCGAAATGGCTTACCAAAAAGCCCAATGTGATGGCTTCTA    |       |       |       |       |       |       |       |
|                                          | (1)     | -----                                                                                              |       |       |       |       |       |       |       |
|                                          |         | Section 364                                                                                        |       |       |       |       |       |       |       |
| T4 NC 000866.4<br>SARS-CoV-2 NC_045512.2 | (34849) | 34849                                                                                              | 34859 | 34870 | 34881 | 34892 | 34903 | 34914 | 34925 |
|                                          | (34849) | GCATAGTAGACTTACCACCGCCATTTTCGTCCAGTAATAAGAGTTTTTTGAACCTTATCTAATTGAATGTCAATCCCATTTTGACCAACTGACATTA  |       |       |       |       |       |       |       |
|                                          | (1)     | -----                                                                                              |       |       |       |       |       |       |       |

## SARS-CoV-2 &amp; T4.apr

|                                          |                |                                                                                                            |       |       |       |       |       |       |       |       |       |
|------------------------------------------|----------------|------------------------------------------------------------------------------------------------------------|-------|-------|-------|-------|-------|-------|-------|-------|-------|
|                                          |                | Section 365                                                                                                |       |       |       |       |       |       |       |       |       |
| T4 NC 000866.4<br>SARS-CoV-2 NC_045512.2 | (34945)        | 34945                                                                                                      | 34958 | 34969 | 34980 | 34991 | 35002 | 35013 | 35024 | 35040 |       |
|                                          | (34945)<br>(1) | TATTTTTATATTTACTCTATTAAGTTTAAAAATTCTTCACAAAAGATTCTTTTAAATGTATCTTTTAGACCATTCTATCATATCATCATAATCTAA<br>-----  |       |       |       |       |       |       |       |       |       |
|                                          |                | Section 366                                                                                                |       |       |       |       |       |       |       |       |       |
| T4 NC 000866.4<br>SARS-CoV-2 NC_045512.2 | (35041)        | 35041                                                                                                      | 35046 | 35057 | 35068 | 35079 | 35090 | 35101 | 35112 | 35123 | 35136 |
|                                          | (35041)<br>(1) | AAAGTATTCATCAAATTCAGCCATGCAAACAACGCCTTGCTGCTGTTTTGATGTGATATAAATTATTCCAACATATCTAGAATCTTCTTCGGTATA<br>-----  |       |       |       |       |       |       |       |       |       |
|                                          |                | Section 367                                                                                                |       |       |       |       |       |       |       |       |       |
| T4 NC 000866.4<br>SARS-CoV-2 NC_045512.2 | (35137)        | 35137                                                                                                      | 35145 | 35156 | 35167 | 35178 | 35189 | 35200 | 35211 | 35232 |       |
|                                          | (35137)<br>(1) | ATCAATATTTGCTATGAATTCATCATTAATGTCAAATGTGAAAACCTTCACAGTATGCATCCTTAATACAAGATACAGCCATATCTCGTAATGATT<br>-----  |       |       |       |       |       |       |       |       |       |
|                                          |                | Section 368                                                                                                |       |       |       |       |       |       |       |       |       |
| T4 NC 000866.4<br>SARS-CoV-2 NC_045512.2 | (35233)        | 35233                                                                                                      | 35244 | 35255 | 35266 | 35277 | 35288 | 35299 | 35310 | 35328 |       |
|                                          | (35233)<br>(1) | TAGGTGTGTCATTATCTAAAATGTTGAAGTTAAAAGATACAGCCCAGTCAGTGCAGACAGTAACCTTTTTAATACAATTATCTTCAACCTCTAACG<br>-----  |       |       |       |       |       |       |       |       |       |
|                                          |                | Section 369                                                                                                |       |       |       |       |       |       |       |       |       |
| T4 NC 000866.4<br>SARS-CoV-2 NC_045512.2 | (35329)        | 35329                                                                                                      | 35343 | 35354 | 35365 | 35376 | 35387 | 35398 | 35409 | 35424 |       |
|                                          | (35329)<br>(1) | GTTCAAACCAGTATTCAATAATTTCTTTATGACCAATATCATCTTTTACTTCACATTTAAAATGCTGACTCATCATAACATTTTTAAATTCATCAA<br>-----  |       |       |       |       |       |       |       |       |       |
|                                          |                | Section 370                                                                                                |       |       |       |       |       |       |       |       |       |
| T4 NC 000866.4<br>SARS-CoV-2 NC_045512.2 | (35425)        | 35425                                                                                                      | 35431 | 35442 | 35453 | 35464 | 35475 | 35486 | 35497 | 35508 | 35520 |
|                                          | (35425)<br>(1) | AAGTCATTGTGTTGCCTCTACATATAGCTGATTTGCATATTGAATAAGTGCTTCACGGTCAGAATCAGTGATGTCTGGAATTGCATTAATATACTC<br>-----  |       |       |       |       |       |       |       |       |       |
|                                          |                | Section 371                                                                                                |       |       |       |       |       |       |       |       |       |
| T4 NC 000866.4<br>SARS-CoV-2 NC_045512.2 | (35521)        | 35521                                                                                                      | 35530 | 35541 | 35552 | 35563 | 35574 | 35585 | 35596 | 35616 |       |
|                                          | (35521)<br>(1) | TTCCATTAATGTCTGAAGCGATTGAACTTCAACTTCTTCACTGTCATCTGACTCGACAGAGTTATCAATCTTTGACACAACCTCGTAATGAATGCAC<br>----- |       |       |       |       |       |       |       |       |       |

## SARS-CoV-2 &amp; T4.apr

|                                          |         |                                                                                                   |       |       |       |       |       |       |       |       |       |
|------------------------------------------|---------|---------------------------------------------------------------------------------------------------|-------|-------|-------|-------|-------|-------|-------|-------|-------|
|                                          |         | Section 372                                                                                       |       |       |       |       |       |       |       |       |       |
| T4 NC 000866.4<br>SARS-CoV-2 NC_045512.2 | (35617) | 35617                                                                                             | 35629 | 35640 | 35651 | 35662 | 35673 | 35684 | 35695 | 35712 |       |
|                                          | (35617) | AACTTTTTCTAGTTCAGATTCGAACCTTCGTCAGATTTTTGTCTACTTCAGTTACTATAACACGTACTGATAGATTTGTAAAATCTTTATAGTCAAT |       |       |       |       |       |       |       |       |       |
|                                          |         | -----                                                                                             |       |       |       |       |       |       |       |       |       |
|                                          |         | Section 373                                                                                       |       |       |       |       |       |       |       |       |       |
| T4 NC 000866.4<br>SARS-CoV-2 NC_045512.2 | (35713) | 35713                                                                                             | 35728 | 35739 | 35750 | 35761 | 35772 | 35783 | 35794 | 35808 |       |
|                                          | (35713) | TTTTTCCTTTAAATGGATAATGAATTCTACGATGCCAGGTAGTATTGTTTGAATAAAATTCGTTTCGTTCTGTTTCTGTATCAAACATCCAGAACCC |       |       |       |       |       |       |       |       |       |
|                                          |         | -----                                                                                             |       |       |       |       |       |       |       |       |       |
|                                          |         | Section 374                                                                                       |       |       |       |       |       |       |       |       |       |
| T4 NC 000866.4<br>SARS-CoV-2 NC_045512.2 | (35809) | 35809                                                                                             | 35816 | 35827 | 35838 | 35849 | 35860 | 35871 | 35882 | 35893 | 35904 |
|                                          | (35809) | ACGAGGGTCATTCTCGTCACCTGCGGTTAGTGTCCATGGTGTCCCAATATATCTGACGTTTGCAGCCTCAGAAATAGTATGGAAGTGACCAGACCA  |       |       |       |       |       |       |       |       |       |
|                                          |         | -----                                                                                             |       |       |       |       |       |       |       |       |       |
|                                          |         | Section 375                                                                                       |       |       |       |       |       |       |       |       |       |
| T4 NC 000866.4<br>SARS-CoV-2 NC_045512.2 | (35905) | 35905                                                                                             | 35915 | 35926 | 35937 | 35948 | 35959 | 35970 | 35981 | 36000 |       |
|                                          | (35905) | CACTTCCTTTATAAGTCTTAAGGAAATCGGGTTCAAGACCATGAGATTTTCATTCTTTATAAAAATAAAATCCATTTCAGTTCCAGTGACCAACACA |       |       |       |       |       |       |       |       |       |
|                                          |         | -----                                                                                             |       |       |       |       |       |       |       |       |       |
|                                          |         | Section 376                                                                                       |       |       |       |       |       |       |       |       |       |
| T4 NC 000866.4<br>SARS-CoV-2 NC_045512.2 | (36001) | 36001                                                                                             | 36014 | 36025 | 36036 | 36047 | 36058 | 36069 | 36080 | 36096 |       |
|                                          | (36001) | AAAAGAAGCAGATGAAGTTTTGATATGCTCAAGAATTTACCAGTATTTTCTTCGCACATCCAAGGAATCAAATCAATCAAACACCCGTCAAATC    |       |       |       |       |       |       |       |       |       |
|                                          |         | -----                                                                                             |       |       |       |       |       |       |       |       |       |
|                                          |         | Section 377                                                                                       |       |       |       |       |       |       |       |       |       |
| T4 NC 000866.4<br>SARS-CoV-2 NC_045512.2 | (36097) | 36097                                                                                             | 36102 | 36113 | 36124 | 36135 | 36146 | 36157 | 36168 | 36179 | 36192 |
|                                          | (36097) | TACTGTAGTAGGCTTATCATACACTTTAACATTAGGATATTTAGCCAAAAGCTCAGTAGAAGCATTTGGATGCATTACATTTTTATAGTGAGATC   |       |       |       |       |       |       |       |       |       |
|                                          |         | -----                                                                                             |       |       |       |       |       |       |       |       |       |
|                                          |         | Section 378                                                                                       |       |       |       |       |       |       |       |       |       |
| T4 NC 000866.4<br>SARS-CoV-2 NC_045512.2 | (36193) | 36193                                                                                             | 36201 | 36212 | 36223 | 36234 | 36245 | 36256 | 36267 | 36288 |       |
|                                          | (36193) | GTGATTTTCTACAATAGTGTGTAATGTAATTCAGCATCATCAAGCGTTTGAACATTTACGGGCAAACCTCCATAGTTTTATGTGTGATCGCTTT    |       |       |       |       |       |       |       |       |       |
|                                          |         | -----                                                                                             |       |       |       |       |       |       |       |       |       |

## SARS-CoV-2 &amp; T4.apr

|                                          |                |                                                                                                     |                       |                       |                       |                       |                       |                       |                       |                       |                       |
|------------------------------------------|----------------|-----------------------------------------------------------------------------------------------------|-----------------------|-----------------------|-----------------------|-----------------------|-----------------------|-----------------------|-----------------------|-----------------------|-----------------------|
|                                          |                | Section 379                                                                                         |                       |                       |                       |                       |                       |                       |                       |                       |                       |
| T4 NC 000866.4<br>SARS-CoV-2 NC_045512.2 | (36289)        | <a href="#">36289</a>                                                                               | <a href="#">36300</a> | <a href="#">36311</a> | <a href="#">36322</a> | <a href="#">36333</a> | <a href="#">36344</a> | <a href="#">36355</a> | <a href="#">36366</a> | <a href="#">36384</a> |                       |
|                                          | (36289)<br>(1) | TCGCACATCAAAAAATATCACCGTATTGAATCCAGGTAGTAATTCCATTTTTCTTAGAATATTCTATCGCTTGCTTAATTCCATCAATTTGAATACC   |                       |                       |                       |                       |                       |                       |                       |                       |                       |
|                                          |                | Section 380                                                                                         |                       |                       |                       |                       |                       |                       |                       |                       |                       |
| T4 NC 000866.4<br>SARS-CoV-2 NC_045512.2 | (36385)        | <a href="#">36385</a>                                                                               | <a href="#">36399</a> | <a href="#">36410</a> | <a href="#">36421</a> | <a href="#">36432</a> | <a href="#">36443</a> | <a href="#">36454</a> | <a href="#">36465</a> | <a href="#">36480</a> |                       |
|                                          | (36385)<br>(1) | GCGAATCCACTCATCATCAGCTTTAACGCCTAAATGCCAATCACCTAAATTTAAATTTTCATATATCAAGAACCGTCATTGAAATGCAAAATAAA     |                       |                       |                       |                       |                       |                       |                       |                       |                       |
|                                          |                | Section 381                                                                                         |                       |                       |                       |                       |                       |                       |                       |                       |                       |
| T4 NC 000866.4<br>SARS-CoV-2 NC_045512.2 | (36481)        | <a href="#">36481</a>                                                                               | <a href="#">36487</a> | <a href="#">36498</a> | <a href="#">36509</a> | <a href="#">36520</a> | <a href="#">36531</a> | <a href="#">36542</a> | <a href="#">36553</a> | <a href="#">36564</a> | <a href="#">36576</a> |
|                                          | (36481)<br>(1) | ATTATTGAAATAAAATCCATCTGGAGTGCTAAAGAACCCAATCCAACATGCTCTAGTGAATAGATAAAATGCAAGAAAAAGTATCACATATCCAAGA   |                       |                       |                       |                       |                       |                       |                       |                       |                       |
|                                          |                | Section 382                                                                                         |                       |                       |                       |                       |                       |                       |                       |                       |                       |
| T4 NC 000866.4<br>SARS-CoV-2 NC_045512.2 | (36577)        | <a href="#">36577</a>                                                                               | <a href="#">36586</a> | <a href="#">36597</a> | <a href="#">36608</a> | <a href="#">36619</a> | <a href="#">36630</a> | <a href="#">36641</a> | <a href="#">36652</a> | <a href="#">36672</a> |                       |
|                                          | (36577)<br>(1) | AATATCATTATATCAAACCTCCGTATAAAGCTAAAGGGCCGAAGCCCTTTATTTTGTAAATAATGTCAAACCTGTTCTTTAAAGCAGAAGCTTGAATCT |                       |                       |                       |                       |                       |                       |                       |                       |                       |
|                                          |                | Section 383                                                                                         |                       |                       |                       |                       |                       |                       |                       |                       |                       |
| T4 NC 000866.4<br>SARS-CoV-2 NC_045512.2 | (36673)        | <a href="#">36673</a>                                                                               | <a href="#">36685</a> | <a href="#">36696</a> | <a href="#">36707</a> | <a href="#">36718</a> | <a href="#">36729</a> | <a href="#">36740</a> | <a href="#">36751</a> | <a href="#">36768</a> |                       |
|                                          | (36673)<br>(1) | TGATGCTGATACAAAAATTCATATGCTTTTTCTCGCTCACGGTCATAAAGAGCTCGGTCAGATGACAGTTCTTTAATACGTTCAAATGTTGATTCC    |                       |                       |                       |                       |                       |                       |                       |                       |                       |
|                                          |                | Section 384                                                                                         |                       |                       |                       |                       |                       |                       |                       |                       |                       |
| T4 NC 000866.4<br>SARS-CoV-2 NC_045512.2 | (36769)        | <a href="#">36769</a>                                                                               | <a href="#">36784</a> | <a href="#">36795</a> | <a href="#">36806</a> | <a href="#">36817</a> | <a href="#">36828</a> | <a href="#">36839</a> | <a href="#">36850</a> | <a href="#">36864</a> |                       |
|                                          | (36769)<br>(1) | ATATCATTTTTATCAAACCAAATGATACCGCTATCATGCGAGGTCAAAGGAGTATTATCAACACGGAATTTTAAATTTTCGCCAGTAGATTTCCAA    |                       |                       |                       |                       |                       |                       |                       |                       |                       |
|                                          |                | Section 385                                                                                         |                       |                       |                       |                       |                       |                       |                       |                       |                       |
| T4 NC 000866.4<br>SARS-CoV-2 NC_045512.2 | (36865)        | <a href="#">36865</a>                                                                               | <a href="#">36872</a> | <a href="#">36883</a> | <a href="#">36894</a> | <a href="#">36905</a> | <a href="#">36916</a> | <a href="#">36927</a> | <a href="#">36938</a> | <a href="#">36949</a> | <a href="#">36960</a> |
|                                          | (36865)<br>(1) | AATACCGGAATTGTTCCACATGCACCAAGCTCGAGATGAGTATATTCGAGTGAGCGTTGTAAGTATTTCTGGTTAAGTTTACTCAACTGATATCCA    |                       |                       |                       |                       |                       |                       |                       |                       |                       |

## SARS-CoV-2 &amp; T4.apr

|                                          |         |                                                                                                   |       |       |       |       |       |       |       |
|------------------------------------------|---------|---------------------------------------------------------------------------------------------------|-------|-------|-------|-------|-------|-------|-------|
|                                          |         | Section 386                                                                                       |       |       |       |       |       |       |       |
| T4 NC 000866.4<br>SARS-CoV-2 NC_045512.2 | (36961) | 36961                                                                                             | 36971 | 36982 | 36993 | 37004 | 37015 | 37026 | 37037 |
|                                          | (36961) | AAGCCAGATTTACTCATTCGTTCAAGCATTTCACTATTAATATAACAATCTAGGATTTGTGCCGTTGATTCGGCGCGAGATTCATTTTATCAATC   |       |       |       |       |       |       |       |
|                                          |         | Section 387                                                                                       |       |       |       |       |       |       |       |
| T4 NC 000866.4<br>SARS-CoV-2 NC_045512.2 | (37057) | 37057                                                                                             | 37070 | 37081 | 37092 | 37103 | 37114 | 37125 | 37136 |
|                                          | (37057) | TCACGATTACCGTAATATTCATACGGAATACCTTTTTCTTAATTGCAATAAAAGCAGGGGAACGTTCCAGACCTTCCATTACAGTGGATTACCA    |       |       |       |       |       |       |       |
|                                          |         | Section 388                                                                                       |       |       |       |       |       |       |       |
| T4 NC 000866.4<br>SARS-CoV-2 NC_045512.2 | (37153) | 37153                                                                                             | 37158 | 37169 | 37180 | 37191 | 37202 | 37213 | 37224 |
|                                          | (37153) | GCAGGTTTTAAGAATTTTTCATGAAAATCAAACATCTGGTAAAAACCTTTCCATGTAGTCGTACGACCAATCCAACGGTTGATATTCATGTTAATT  |       |       |       |       |       |       |       |
|                                          |         | Section 389                                                                                       |       |       |       |       |       |       |       |
| T4 NC 000866.4<br>SARS-CoV-2 NC_045512.2 | (37249) | 37249                                                                                             | 37257 | 37268 | 37279 | 37290 | 37301 | 37312 | 37323 |
|                                          | (37249) | TCAGAAACATCTTTCCAATAAGTTGACCGAACCTTCACAATATCCATAGGAGGCTGAAAATTATATACTGTGCGGTGCTTCTTCAATATCATCAAAC |       |       |       |       |       |       |       |
|                                          |         | Section 390                                                                                       |       |       |       |       |       |       |       |
| T4 NC 000866.4<br>SARS-CoV-2 NC_045512.2 | (37345) | 37345                                                                                             | 37356 | 37367 | 37378 | 37389 | 37400 | 37411 | 37422 |
|                                          | (37345) | AGAGAAACAGTTTCTGGATACCATTCTTTCATCAGAACTTTATTTAAATCACCATTATCAGAATGGCTAAAAATAACATCAGCTCGACGAACAGTT  |       |       |       |       |       |       |       |
|                                          |         | Section 391                                                                                       |       |       |       |       |       |       |       |
| T4 NC 000866.4<br>SARS-CoV-2 NC_045512.2 | (37441) | 37441                                                                                             | 37455 | 37466 | 37477 | 37488 | 37499 | 37510 | 37521 |
|                                          | (37441) | TCTTCTAATCCCAAATTTTCGACGCAAAGAAAGAACAGAATGATCATGCTGATAAACTACAACACGAATAGAAGGTTTAATATTATCTAAAAGTTTT |       |       |       |       |       |       |       |
|                                          |         | Section 392                                                                                       |       |       |       |       |       |       |       |
| T4 NC 000866.4<br>SARS-CoV-2 NC_045512.2 | (37537) | 37537                                                                                             | 37543 | 37554 | 37565 | 37576 | 37587 | 37598 | 37609 |
|                                          | (37537) | TTATAGTTATTAATCGTAGCTTCTTGAACGGAAGTAGCAGGAACAGAATTAATAATTAGAATATCACAATCATTTACTAGCTTAAGTGCTTTATCG  |       |       |       |       |       |       |       |



## SARS-CoV-2 &amp; T4.apr

|                                          |         |                                                                                                   |       |       |       |       |       |       |       |
|------------------------------------------|---------|---------------------------------------------------------------------------------------------------|-------|-------|-------|-------|-------|-------|-------|
|                                          |         | Section 393                                                                                       |       |       |       |       |       |       |       |
| T4 NC 000866.4<br>SARS-CoV-2 NC_045512.2 | (37633) | 37633                                                                                             | 37642 | 37653 | 37664 | 37675 | 37686 | 37697 | 37708 |
|                                          | (37633) | TATTCTTTAGCTAAAATAACTGGAATTGAAAATGATTTGTGGTCATGAGAACTTGTACGAGTAAATGATTTATCTTTAGCATAAACCAAAGTTACT  |       |       |       |       |       |       |       |
|                                          |         | Section 394                                                                                       |       |       |       |       |       |       |       |
| T4 NC 000866.4<br>SARS-CoV-2 NC_045512.2 | (37729) | 37729                                                                                             | 37741 | 37752 | 37763 | 37774 | 37785 | 37796 | 37807 |
|                                          | (37729) | TCATGACCATTTTTAATAAACCAATCACGTTGCTCGAGTGAGAATTTTGTTACACCACAACCTTCAAGACCTCGAGCCATAAAAAATGCAAATACGC |       |       |       |       |       |       |       |
|                                          |         | Section 395                                                                                       |       |       |       |       |       |       |       |
| T4 NC 000866.4<br>SARS-CoV-2 NC_045512.2 | (37825) | 37825                                                                                             | 37840 | 37851 | 37862 | 37873 | 37884 | 37895 | 37906 |
|                                          | (37825) | ATAGTTTTCTCTTTTCATTTAATAAATCATGTAAATAATATTTTATTTTCTATAAAACGCTACGAATAGGCCCAAACATATCCATAAGCAATTTT   |       |       |       |       |       |       |       |
|                                          |         | Section 396                                                                                       |       |       |       |       |       |       |       |
| T4 NC 000866.4<br>SARS-CoV-2 NC_045512.2 | (37921) | 37921                                                                                             | 37928 | 37939 | 37950 | 37961 | 37972 | 37983 | 37994 |
|                                          | (37921) | GCTTTTTCCAGATATGCACTTTTTAATATTAGACATGCATCCTTTAACGGATACAGCTGCGTCTTTAATTCTAGGAAATACTCGTAATAATTTTCC  |       |       |       |       |       |       |       |
|                                          |         | Section 397                                                                                       |       |       |       |       |       |       |       |
| T4 NC 000866.4<br>SARS-CoV-2 NC_045512.2 | (38017) | 38017                                                                                             | 38027 | 38038 | 38049 | 38060 | 38071 | 38082 | 38093 |
|                                          | (38017) | AGTAGTATCATATTGAAATACTGGCACATTTCTTTTCTGAGTTATCCCACGTTTAGATTTAGACATTTTTTGTGTTAGTTGCATTAGACATCCTAGA |       |       |       |       |       |       |       |
|                                          |         | Section 398                                                                                       |       |       |       |       |       |       |       |
| T4 NC 000866.4<br>SARS-CoV-2 NC_045512.2 | (38113) | 38113                                                                                             | 38126 | 38137 | 38148 | 38159 | 38170 | 38181 | 38192 |
|                                          | (38113) | GGGCTTTCTCTATGTTATCAGAATAATAATATTTCCATTGAAATCCTCCAGCGGTTTTCTTTTACCATCTACACATTGTTTAATTGAAGTTGAACA  |       |       |       |       |       |       |       |
|                                          |         | Section 399                                                                                       |       |       |       |       |       |       |       |
| T4 NC 000866.4<br>SARS-CoV-2 NC_045512.2 | (38209) | 38209                                                                                             | 38214 | 38225 | 38236 | 38247 | 38258 | 38269 | 38280 |
|                                          | (38209) | GCTATATGACATATCTTCTGCAGCATCTGTAATACATCTATATTTGCGAATAAAATTTCCATTTAAATCATATTGATAAATTGGTTTTCCAGCATT  |       |       |       |       |       |       |       |

## SARS-CoV-2 &amp; T4.apr

|                                          |                |                                                                                                             |       |       |       |       |       |       |       |       |       |
|------------------------------------------|----------------|-------------------------------------------------------------------------------------------------------------|-------|-------|-------|-------|-------|-------|-------|-------|-------|
|                                          |                | Section 400                                                                                                 |       |       |       |       |       |       |       |       |       |
| T4 NC 000866.4<br>SARS-CoV-2 NC_045512.2 | (38305)        | 38305                                                                                                       | 38313 | 38324 | 38335 | 38346 | 38357 | 38368 | 38379 | 38400 |       |
|                                          | (38305)<br>(1) | TCGTCTAGCGTTAGACATGTATTTTTTATTATCATCATCTTCCAGAACTCTTTCATGCTTCCGATATTGAAGAAGATACAGCTGTTTTAATCCA<br>-----     |       |       |       |       |       |       |       |       |       |
|                                          |                | Section 401                                                                                                 |       |       |       |       |       |       |       |       |       |
| T4 NC 000866.4<br>SARS-CoV-2 NC_045512.2 | (38401)        | 38401                                                                                                       | 38412 | 38423 | 38434 | 38445 | 38456 | 38467 | 38478 | 38496 |       |
|                                          | (38401)<br>(1) | TCCATACATTTTATTATTAGTCTTGTTCCGTCAGAACTATAACACATCATACGAATAGCTAAAGCCAATTTAGGAAGTCTATAAATTTTAAATAA<br>-----    |       |       |       |       |       |       |       |       |       |
|                                          |                | Section 402                                                                                                 |       |       |       |       |       |       |       |       |       |
| T4 NC 000866.4<br>SARS-CoV-2 NC_045512.2 | (38497)        | 38497                                                                                                       | 38511 | 38522 | 38533 | 38544 | 38555 | 38566 | 38577 | 38592 |       |
|                                          | (38497)<br>(1) | TAATAAATGCGCGGTAAATGTTCTTCTGGTGTCAAAGAAGCTAAATTAGTTTTATCATCTGTACCACCCATACATCTAGGAATTATATGATGTGT<br>-----    |       |       |       |       |       |       |       |       |       |
|                                          |                | Section 403                                                                                                 |       |       |       |       |       |       |       |       |       |
| T4 NC 000866.4<br>SARS-CoV-2 NC_045512.2 | (38593)        | 38593                                                                                                       | 38599 | 38610 | 38621 | 38632 | 38643 | 38654 | 38665 | 38676 | 38688 |
|                                          | (38593)<br>(1) | TTCAGTATAGTATGTCAAAGACTTTTATCATTGCCTCTGTTTAGTCTTTTTTCGATCAGTAAATTATATATGTTTAAATAATTCATTTTAGTTTA<br>-----    |       |       |       |       |       |       |       |       |       |
|                                          |                | Section 404                                                                                                 |       |       |       |       |       |       |       |       |       |
| T4 NC 000866.4<br>SARS-CoV-2 NC_045512.2 | (38689)        | 38689                                                                                                       | 38698 | 38709 | 38720 | 38731 | 38742 | 38753 | 38764 | 38784 |       |
|                                          | (38689)<br>(1) | TTTTACCAAAAAATTTATAAAGCAATATAGGAGCCGAAGCTCCTATCCACATAATACGCCATACAGAGGCTCGTTAGAACTTTTAAATTTTATGCG<br>-----   |       |       |       |       |       |       |       |       |       |
|                                          |                | Section 405                                                                                                 |       |       |       |       |       |       |       |       |       |
| T4 NC 000866.4<br>SARS-CoV-2 NC_045512.2 | (38785)        | 38785                                                                                                       | 38797 | 38808 | 38819 | 38830 | 38841 | 38852 | 38863 | 38880 |       |
|                                          | (38785)<br>(1) | CTTATATGTTATAGTTCCTTCTGCTTTAGCTTTATCATGAGCCTCTTTAAAGCGTCTCATCATTTCTCTCTAGAGGAACGAATTTTATTATAATC<br>-----    |       |       |       |       |       |       |       |       |       |
|                                          |                | Section 406                                                                                                 |       |       |       |       |       |       |       |       |       |
| T4 NC 000866.4<br>SARS-CoV-2 NC_045512.2 | (38881)        | 38881                                                                                                       | 38896 | 38907 | 38918 | 38929 | 38940 | 38951 | 38962 | 38976 |       |
|                                          | (38881)<br>(1) | TATTTTCAGAAGTCGGATGTTTCATCTTTCACAGTTGCCACCATTTTTTGACTTGATAAGAATCAACCCACACTTTCATATTAGGGTCTGCTCTTACA<br>----- |       |       |       |       |       |       |       |       |       |

## SARS-CoV-2 &amp; T4.apr

|                                          |         |                                                                                                      |       |       |       |       |       |       |       |       |       |
|------------------------------------------|---------|------------------------------------------------------------------------------------------------------|-------|-------|-------|-------|-------|-------|-------|-------|-------|
| Section 407                              |         |                                                                                                      |       |       |       |       |       |       |       |       |       |
| T4 NC 000866.4<br>SARS-CoV-2 NC_045512.2 | (38977) | 38977                                                                                                | 38984 | 38995 | 39006 | 39017 | 39028 | 39039 | 39050 | 39061 | 39072 |
|                                          | (38977) | ATAGGAGGATTAAC TTCTTTGATTGAAC TATCACGGTATTCTTTTTTCAGAAATTTTCACGCAAAGATGACCATTCAAAGATT CAGTAAATCCTGCA |       |       |       |       |       |       |       |       |       |
|                                          | (1)     | -----                                                                                                |       |       |       |       |       |       |       |       |       |
| Section 408                              |         |                                                                                                      |       |       |       |       |       |       |       |       |       |
| T4 NC 000866.4<br>SARS-CoV-2 NC_045512.2 | (39073) | 39073                                                                                                | 39083 | 39094 | 39105 | 39116 | 39127 | 39138 | 39149 | 39168 |       |
|                                          | (39073) | TTAATTTTAAAGACGCTTGAATTTTACGTGTGTAAGCATCAATCATATCCTCAATCTGCGATCTAGTAGTCTTCCAAAGAATACTGATGAGTTCATC    |       |       |       |       |       |       |       |       |       |
|                                          | (1)     | -----                                                                                                |       |       |       |       |       |       |       |       |       |
| Section 409                              |         |                                                                                                      |       |       |       |       |       |       |       |       |       |
| T4 NC 000866.4<br>SARS-CoV-2 NC_045512.2 | (39169) | 39169                                                                                                | 39182 | 39193 | 39204 | 39215 | 39226 | 39237 | 39248 | 39264 |       |
|                                          | (39169) | GTTATATGGCTGTTTTAGAATATCCCGACTTTTCTTGATAGCATATTTCGTATTGAGCAAATTTATTATTTTCAGCTGCGATCTGAGCGTGCTTATA    |       |       |       |       |       |       |       |       |       |
|                                          | (1)     | -----                                                                                                |       |       |       |       |       |       |       |       |       |
| Section 410                              |         |                                                                                                      |       |       |       |       |       |       |       |       |       |
| T4 NC 000866.4<br>SARS-CoV-2 NC_045512.2 | (39265) | 39265                                                                                                | 39270 | 39281 | 39292 | 39303 | 39314 | 39325 | 39336 | 39347 | 39360 |
|                                          | (39265) | AAGACGATTTCAGTTCGCGTTTGTGTTTTAGACAATAACTTATTTGCTTTTCTTCTGCTTCAAGACGGTTCTTTTCTTCAATAGAAGAAATAAGCTT    |       |       |       |       |       |       |       |       |       |
|                                          | (1)     | -----                                                                                                |       |       |       |       |       |       |       |       |       |
| Section 411                              |         |                                                                                                      |       |       |       |       |       |       |       |       |       |
| T4 NC 000866.4<br>SARS-CoV-2 NC_045512.2 | (39361) | 39361                                                                                                | 39369 | 39380 | 39391 | 39402 | 39413 | 39424 | 39435 | 39456 |       |
|                                          | (39361) | TTCCACTTCATCATTAATTTTCGGGTTTATCAGTCATATTATTTCTCTAATATAAAATAAAATCATCATCTGTTAAATGATACCGATAGTTTAATT     |       |       |       |       |       |       |       |       |       |
|                                          | (1)     | -----                                                                                                |       |       |       |       |       |       |       |       |       |
| Section 412                              |         |                                                                                                      |       |       |       |       |       |       |       |       |       |
| T4 NC 000866.4<br>SARS-CoV-2 NC_045512.2 | (39457) | 39457                                                                                                | 39468 | 39479 | 39490 | 39501 | 39512 | 39523 | 39534 | 39552 |       |
|                                          | (39457) | CTACACCATTAGATTTAAAAGCGGTATCATACGGATTTTCTGGATCAATATCAATGTCAAGAGCTAAACTTCCCTGAGATACATTTTAAAGTAAAT     |       |       |       |       |       |       |       |       |       |
|                                          | (1)     | -----                                                                                                |       |       |       |       |       |       |       |       |       |
| Section 413                              |         |                                                                                                      |       |       |       |       |       |       |       |       |       |
| T4 NC 000866.4<br>SARS-CoV-2 NC_045512.2 | (39553) | 39553                                                                                                | 39567 | 39578 | 39589 | 39600 | 39611 | 39622 | 39633 | 39648 |       |
|                                          | (39553) | AGGGAATAGCTTCAACTTCAGGTATTTCTTCCAAGAATCCGGAGAGGTTAATCGTTAGCCTCATATAAAAAATCCAACTAGGAGAATCATCTACA      |       |       |       |       |       |       |       |       |       |
|                                          | (1)     | -----                                                                                                |       |       |       |       |       |       |       |       |       |

## SARS-CoV-2 &amp; T4.apr

|                                          |         |                                                                                                    |       |       |       |       |       |       |       |             |       |
|------------------------------------------|---------|----------------------------------------------------------------------------------------------------|-------|-------|-------|-------|-------|-------|-------|-------------|-------|
|                                          |         |                                                                                                    |       |       |       |       |       |       |       | Section 414 |       |
| T4 NC 000866.4<br>SARS-CoV-2 NC_045512.2 | (39649) | 39649                                                                                              | 39655 | 39666 | 39677 | 39688 | 39699 | 39710 | 39721 | 39732       | 39744 |
|                                          | (39649) | ACACTTTTCTTTTCAGCCCCCGGTGTTCTATAGGTTGATTCTTCGTAATGCGTCATTTTATCATAGATGTCTTGAATAAAAGTTTCATCTACTAAC   |       |       |       |       |       |       |       |             |       |
|                                          | (1)     | -----                                                                                              |       |       |       |       |       |       |       |             |       |
|                                          |         |                                                                                                    |       |       |       |       |       |       |       | Section 415 |       |
| T4 NC 000866.4<br>SARS-CoV-2 NC_045512.2 | (39745) | 39745                                                                                              | 39754 | 39765 | 39776 | 39787 | 39798 | 39809 | 39820 | 39840       |       |
|                                          | (39745) | GCAACCATATCGTCGTCACGGCTGTCATAGACATTGTGAACGAAGTAACTATATTTCTTTGCAACTTCCTTACGTTCTTTTTTAATACGTTGGACG   |       |       |       |       |       |       |       |             |       |
|                                          | (1)     | -----                                                                                              |       |       |       |       |       |       |       |             |       |
|                                          |         |                                                                                                    |       |       |       |       |       |       |       | Section 416 |       |
| T4 NC 000866.4<br>SARS-CoV-2 NC_045512.2 | (39841) | 39841                                                                                              | 39853 | 39864 | 39875 | 39886 | 39897 | 39908 | 39919 | 39936       |       |
|                                          | (39841) | AATGCATTAAAAACAAGCTTGAGTTATATACGCATGTGGGTTTTTATATTTTCGTTTCATCAAAATTGTGAAGCCCCTTAATAGAAGCTTCTATACCA |       |       |       |       |       |       |       |             |       |
|                                          | (1)     | -----                                                                                              |       |       |       |       |       |       |       |             |       |
|                                          |         |                                                                                                    |       |       |       |       |       |       |       | Section 417 |       |
| T4 NC 000866.4<br>SARS-CoV-2 NC_045512.2 | (39937) | 39937                                                                                              | 39952 | 39963 | 39974 | 39985 | 39996 | 40007 | 40018 | 40032       |       |
|                                          | (39937) | TCTGCAATCATTTCTTGTTTCCAAGACTGGGTGTATCCTGAAAAGTTGAAACGTTTAGATAAGCCTTCTGCAATAAGCATAATGGCTAATCCGATA   |       |       |       |       |       |       |       |             |       |
|                                          | (1)     | -----                                                                                              |       |       |       |       |       |       |       |             |       |
|                                          |         |                                                                                                    |       |       |       |       |       |       |       | Section 418 |       |
| T4 NC 000866.4<br>SARS-CoV-2 NC_045512.2 | (40033) | 40033                                                                                              | 40040 | 40051 | 40062 | 40073 | 40084 | 40095 | 40106 | 40117       | 40128 |
|                                          | (40033) | GTATCATTCTGACGAACTACTTTATTTGGGTCTTTATTATTGCTAATTCTGTTTTCCAATCAATAATAGCTTGTAAGCTCTTTATTGTTTACG      |       |       |       |       |       |       |       |             |       |
|                                          | (1)     | -----                                                                                              |       |       |       |       |       |       |       |             |       |
|                                          |         |                                                                                                    |       |       |       |       |       |       |       | Section 419 |       |
| T4 NC 000866.4<br>SARS-CoV-2 NC_045512.2 | (40129) | 40129                                                                                              | 40139 | 40150 | 40161 | 40172 | 40183 | 40194 | 40205 | 40224       |       |
|                                          | (40129) | TAATTATATTTAGGCTTAGTTTCTGACATTTTCACCTCTTAGCTCAATTCATAGATCTATTATATCATAATATTTGAAGACCTATCTTAAAGCATA   |       |       |       |       |       |       |       |             |       |
|                                          | (1)     | -----                                                                                              |       |       |       |       |       |       |       |             |       |
|                                          |         |                                                                                                    |       |       |       |       |       |       |       | Section 420 |       |
| T4 NC 000866.4<br>SARS-CoV-2 NC_045512.2 | (40225) | 40225                                                                                              | 40238 | 40249 | 40260 | 40271 | 40282 | 40293 | 40304 | 40320       |       |
|                                          | (40225) | GAGGATGAATCAATTTCAAGCACTTCATCAGATTAGCCGCTCCAAGAGCTGCATCTAGTGAATCAAATTGGTCAACATATTCAATTAATTGCCCGT   |       |       |       |       |       |       |       |             |       |
|                                          | (1)     | -----                                                                                              |       |       |       |       |       |       |       |             |       |

## SARS-CoV-2 &amp; T4.apr

|                                          |         |                                                                                                     |       |       |       |       |       |       |       |       |       |
|------------------------------------------|---------|-----------------------------------------------------------------------------------------------------|-------|-------|-------|-------|-------|-------|-------|-------|-------|
|                                          |         | Section 421                                                                                         |       |       |       |       |       |       |       |       |       |
| T4 NC 000866.4<br>SARS-CoV-2 NC_045512.2 | (40321) | 40321                                                                                               | 40326 | 40337 | 40348 | 40359 | 40370 | 40381 | 40392 | 40403 | 40416 |
|                                          | (40321) | AATTAGCGTATAACCACCATTTGGCTAAATTCATACTCAAGGATGAATCCATTTCTTCAATTTGAGTTAAACCAATGCCATTTGTATTTACTTCAT    |       |       |       |       |       |       |       |       |       |
|                                          | (1)     | -----                                                                                               |       |       |       |       |       |       |       |       |       |
|                                          |         | Section 422                                                                                         |       |       |       |       |       |       |       |       |       |
| T4 NC 000866.4<br>SARS-CoV-2 NC_045512.2 | (40417) | 40417                                                                                               | 40425 | 40436 | 40447 | 40458 | 40469 | 40480 | 40491 |       | 40512 |
|                                          | (40417) | ACCCAGCGAGACGTAAATCGTTAATAAGAGCTTCGTTTACATAATTATACCTTAGTAATTTTCAGGTCTGCAAAATTTTCTTGC GTTGATTTTTTCAT |       |       |       |       |       |       |       |       |       |
|                                          | (1)     | -----                                                                                               |       |       |       |       |       |       |       |       |       |
|                                          |         | Section 423                                                                                         |       |       |       |       |       |       |       |       |       |
| T4 NC 000866.4<br>SARS-CoV-2 NC_045512.2 | (40513) | 40513                                                                                               | 40524 | 40535 | 40546 | 40557 | 40568 | 40579 | 40590 |       | 40608 |
|                                          | (40513) | GCGACGAATAGTTTTATCGGAAATTTTCATGCTTTTGATAAGCTTTAGATTCTACACCAAAGCTTTAACATCAAATTTCTGACAAGATATATTGAAC   |       |       |       |       |       |       |       |       |       |
|                                          | (1)     | -----                                                                                               |       |       |       |       |       |       |       |       |       |
|                                          |         | Section 424                                                                                         |       |       |       |       |       |       |       |       |       |
| T4 NC 000866.4<br>SARS-CoV-2 NC_045512.2 | (40609) | 40609                                                                                               | 40623 | 40634 | 40645 | 40656 | 40667 | 40678 | 40689 |       | 40704 |
|                                          | (40609) | CAACAATTCACGGACAGTATTGCGTCCAATCTTCTGATCATTCTGTTTCATCGTTTGATGAAGCTCTTTTTCCCATTATCCAAAATTTGAGGAGT     |       |       |       |       |       |       |       |       |       |
|                                          | (1)     | -----                                                                                               |       |       |       |       |       |       |       |       |       |
|                                          |         | Section 425                                                                                         |       |       |       |       |       |       |       |       |       |
| T4 NC 000866.4<br>SARS-CoV-2 NC_045512.2 | (40705) | 40705                                                                                               | 40711 | 40722 | 40733 | 40744 | 40755 | 40766 | 40777 | 40788 | 40800 |
|                                          | (40705) | TACAATATCGCCTTTTTCTAGCAAAGAACTACTTTATCATATGCGTAAGAATTGATGGCGTTTTTAATTTGAATAGTCATACATTATCCTCAATT     |       |       |       |       |       |       |       |       |       |
|                                          | (1)     | -----                                                                                               |       |       |       |       |       |       |       |       |       |
|                                          |         | Section 426                                                                                         |       |       |       |       |       |       |       |       |       |
| T4 NC 000866.4<br>SARS-CoV-2 NC_045512.2 | (40801) | 40801                                                                                               | 40810 | 40821 | 40832 | 40843 | 40854 | 40865 | 40876 |       | 40896 |
|                                          | (40801) | ACGTTAAATTTTATTATCCAAAAAGGCCGAAGCCCTTAGGCTAAACTTTTTGGCACCCCTTCAGCCTTCGTACATCATTGCGACTGACAATGACA     |       |       |       |       |       |       |       |       |       |
|                                          | (1)     | -----                                                                                               |       |       |       |       |       |       |       |       |       |
|                                          |         | Section 427                                                                                         |       |       |       |       |       |       |       |       |       |
| T4 NC 000866.4<br>SARS-CoV-2 NC_045512.2 | (40897) | 40897                                                                                               | 40909 | 40920 | 40931 | 40942 | 40953 | 40964 | 40975 |       | 40992 |
|                                          | (40897) | AAGCTCCTTCACATGCTGCATACTTATTATCCAGAACCAATTTAGAAAACTTCATCCTCAATACCGTTGTGTTTCATGTTCTGAAAAATTTGG       |       |       |       |       |       |       |       |       |       |
|                                          | (1)     | -----                                                                                               |       |       |       |       |       |       |       |       |       |

## SARS-CoV-2 &amp; T4.apr

|                                          |         |                                                                                                   |       |       |       |       |       |       |       |
|------------------------------------------|---------|---------------------------------------------------------------------------------------------------|-------|-------|-------|-------|-------|-------|-------|
|                                          |         | Section 428                                                                                       |       |       |       |       |       |       |       |
| T4 NC 000866.4<br>SARS-CoV-2 NC_045512.2 | (40993) | 40993                                                                                             | 41008 | 41019 | 41030 | 41041 | 41052 | 41063 | 41074 |
|                                          | (40993) | CGCGTTCTTCAGCAATTCGCTGCGATAATTTAGATTCAGGATTCATTTAAATTTCCCAATTGCCATTTTCATCAATAAATTTAATCCAGTCATTTA  |       |       |       |       |       |       |       |
|                                          | (1)     | -----                                                                                             |       |       |       |       |       |       |       |
|                                          |         | Section 429                                                                                       |       |       |       |       |       |       |       |
| T4 NC 000866.4<br>SARS-CoV-2 NC_045512.2 | (41089) | 41089                                                                                             | 41096 | 41107 | 41118 | 41129 | 41140 | 41151 | 41162 |
|                                          | (41089) | CTGACCACTTGGTCGTATCGCCTTTTGGAGTAACATTTAAAGTGATAGCCCTTGCTTAAAAAGCATGCGTTTGATATTCATATTTTCCTCAGCTG   |       |       |       |       |       |       |       |
|                                          | (1)     | -----                                                                                             |       |       |       |       |       |       |       |
|                                          |         | Section 430                                                                                       |       |       |       |       |       |       |       |
| T4 NC 000866.4<br>SARS-CoV-2 NC_045512.2 | (41185) | 41185                                                                                             | 41195 | 41206 | 41217 | 41228 | 41239 | 41250 | 41261 |
|                                          | (41185) | TAACGATAACACTCGTTTGATTTACGTTTAGCAACTCGTTGAGAAGTATTATAATCAAAATCATCATCAATGTAAACTGATTTTTTCAACTTTCTT  |       |       |       |       |       |       |       |
|                                          | (1)     | -----                                                                                             |       |       |       |       |       |       |       |
|                                          |         | Section 431                                                                                       |       |       |       |       |       |       |       |
| T4 NC 000866.4<br>SARS-CoV-2 NC_045512.2 | (41281) | 41281                                                                                             | 41294 | 41305 | 41316 | 41327 | 41338 | 41349 | 41360 |
|                                          | (41281) | ACTTCACCGCGTAATTGACGATTTAACTCATCTTTAACTTCTGAATCAATACCTTTTCATTCTACGCCATTTATCTGAGCGAAAAATGTTTTCAACC |       |       |       |       |       |       |       |
|                                          | (1)     | -----                                                                                             |       |       |       |       |       |       |       |
|                                          |         | Section 432                                                                                       |       |       |       |       |       |       |       |
| T4 NC 000866.4<br>SARS-CoV-2 NC_045512.2 | (41377) | 41377                                                                                             | 41382 | 41393 | 41404 | 41415 | 41426 | 41437 | 41448 |
|                                          | (41377) | ATATCTTTATGACTTACCCCATCAGGAGCTTTACGCTTTCCGAAATAGTCATAATCAGCACTTTTAAGTCTTTACGACGATACGTTTTACCCATG   |       |       |       |       |       |       |       |
|                                          | (1)     | -----                                                                                             |       |       |       |       |       |       |       |
|                                          |         | Section 433                                                                                       |       |       |       |       |       |       |       |
| T4 NC 000866.4<br>SARS-CoV-2 NC_045512.2 | (41473) | 41473                                                                                             | 41481 | 41492 | 41503 | 41514 | 41525 | 41536 | 41547 |
|                                          | (41473) | GAGTTTAATTTCTTAGCAACTGAACTAAATACAGCACGATCACAAATCATACGTTTATGTAACCTTGAGTATAAGATAGTAAACATCAAAACCATT  |       |       |       |       |       |       |       |
|                                          | (1)     | -----                                                                                             |       |       |       |       |       |       |       |
|                                          |         | Section 434                                                                                       |       |       |       |       |       |       |       |
| T4 NC 000866.4<br>SARS-CoV-2 NC_045512.2 | (41569) | 41569                                                                                             | 41580 | 41591 | 41602 | 41613 | 41624 | 41635 | 41646 |
|                                          | (41569) | TACATAAGTAACACGAACAACATTACCATTACAGAGATAATACTGTCCCTTTTAACTCTCTTTATCAACCACAACCATATCAATTCCTCAAAGGTA  |       |       |       |       |       |       |       |
|                                          | (1)     | -----                                                                                             |       |       |       |       |       |       |       |

## SARS-CoV-2 &amp; T4.apr

|                                          |                |                                                                                                     |       |       |       |       |       |       |       |       |       |
|------------------------------------------|----------------|-----------------------------------------------------------------------------------------------------|-------|-------|-------|-------|-------|-------|-------|-------|-------|
|                                          |                | Section 435                                                                                         |       |       |       |       |       |       |       |       |       |
| T4 NC 000866.4<br>SARS-CoV-2 NC_045512.2 | (41665)        | 41665                                                                                               | 41679 | 41690 | 41701 | 41712 | 41723 | 41734 | 41745 | 41760 |       |
|                                          | (41665)<br>(1) | ATTCATATGTTAATAATAACACGGTTTGAAC TTGTTGTAAACAAC TTTGTGAAAAATATTTTAGGGAATGATAAGAAAGGAACGATAGCTTAGAAT  |       |       |       |       |       |       |       |       |       |
|                                          |                | Section 436                                                                                         |       |       |       |       |       |       |       |       |       |
| T4 NC 000866.4<br>SARS-CoV-2 NC_045512.2 | (41761)        | 41761                                                                                               | 41767 | 41778 | 41789 | 41800 | 41811 | 41822 | 41833 | 41844 | 41856 |
|                                          | (41761)<br>(1) | GGTAATATACAGAATGTGAGAAAGAAAGGCCAGAGGGCCGTCCTTAATCTTCTATGATATCTCTATCATATCCAAGTGAAATGAGAGTTTCTTTG     |       |       |       |       |       |       |       |       |       |
|                                          |                | Section 437                                                                                         |       |       |       |       |       |       |       |       |       |
| T4 NC 000866.4<br>SARS-CoV-2 NC_045512.2 | (41857)        | 41857                                                                                               | 41866 | 41877 | 41888 | 41899 | 41910 | 41921 | 41932 | 41952 |       |
|                                          | (41857)<br>(1) | AAGTGT TTAATGTTCTTTTGTCTAGAAATCATTAAATGAAAATGACTGGATAACGAATGTTAAGAGATGTGAATCCAGCGCGTTTAGCAAGAGATACA |       |       |       |       |       |       |       |       |       |
|                                          |                | Section 438                                                                                         |       |       |       |       |       |       |       |       |       |
| T4 NC 000866.4<br>SARS-CoV-2 NC_045512.2 | (41953)        | 41953                                                                                               | 41965 | 41976 | 41987 | 41998 | 42009 | 42020 | 42031 | 42048 |       |
|                                          | (41953)<br>(1) | ATCAGCGGACGATCATACTCAATCTTACCATTATTTGTAAGAACTTTATAGAAAGTAAAAGGAGCATTGAGCTCCTTTAGAAGTTTTGTAAC TGAT   |       |       |       |       |       |       |       |       |       |
|                                          |                | Section 439                                                                                         |       |       |       |       |       |       |       |       |       |
| T4 NC 000866.4<br>SARS-CoV-2 NC_045512.2 | (42049)        | 42049                                                                                               | 42064 | 42075 | 42086 | 42097 | 42108 | 42119 | 42130 | 42144 |       |
|                                          | (42049)<br>(1) | TGACATCCAGGACAACGACCTACTTCATCTGGAATTCATAGACTTCAATCTTATTTGTTTCACAACTATTCCTTACTAAGAGCAGCATT CAGCT     |       |       |       |       |       |       |       |       |       |
|                                          |                | Section 440                                                                                         |       |       |       |       |       |       |       |       |       |
| T4 NC 000866.4<br>SARS-CoV-2 NC_045512.2 | (42145)        | 42145                                                                                               | 42152 | 42163 | 42174 | 42185 | 42196 | 42207 | 42218 | 42229 | 42240 |
|                                          | (42145)<br>(1) | TGTTAGTAATTTTATCCAGACGCTCATTGAATTCAGTAGAAGATAAGCCCTTTTCTGGAGAAATCAAATAATCACGAAAAATATAGCAATAAAAG     |       |       |       |       |       |       |       |       |       |
|                                          |                | Section 441                                                                                         |       |       |       |       |       |       |       |       |       |
| T4 NC 000866.4<br>SARS-CoV-2 NC_045512.2 | (42241)        | 42241                                                                                               | 42251 | 42262 | 42273 | 42284 | 42295 | 42306 | 42317 | 42336 |       |
|                                          | (42241)<br>(1) | GAATAAGGAAAAATAGCTCCAAC TGCCATAAACAGAAAGAATGTTACAGTTGTAAGAAATCAGCTAAACCTTTACGAAATTTATACATTTACATTT   |       |       |       |       |       |       |       |       |       |

## SARS-CoV-2 &amp; T4.apr

|                                          |         |                                                                                                   |                       |                       |                       |                       |                       |                       |                       |                       |                       |
|------------------------------------------|---------|---------------------------------------------------------------------------------------------------|-----------------------|-----------------------|-----------------------|-----------------------|-----------------------|-----------------------|-----------------------|-----------------------|-----------------------|
|                                          |         | Section 442                                                                                       |                       |                       |                       |                       |                       |                       |                       |                       |                       |
| T4 NC 000866.4<br>SARS-CoV-2 NC_045512.2 | (42337) | <a href="#">42337</a>                                                                             | <a href="#">42350</a> | <a href="#">42361</a> | <a href="#">42372</a> | <a href="#">42383</a> | <a href="#">42394</a> | <a href="#">42405</a> | <a href="#">42416</a> | <a href="#">42432</a> |                       |
|                                          | (42337) | ACCTTTAATTGATTAAACCAAGCATTGATAAGCACTAAACTATACTGCGAATAAAATTCTGGACCAAATGAAAATCATATCATTATAGTATCCAT   |                       |                       |                       |                       |                       |                       |                       |                       |                       |
|                                          | (1)     | -----                                                                                             |                       |                       |                       |                       |                       |                       |                       |                       |                       |
|                                          |         | Section 443                                                                                       |                       |                       |                       |                       |                       |                       |                       |                       |                       |
| T4 NC 000866.4<br>SARS-CoV-2 NC_045512.2 | (42433) | <a href="#">42433</a>                                                                             | <a href="#">42438</a> | <a href="#">42449</a> | <a href="#">42460</a> | <a href="#">42471</a> | <a href="#">42482</a> | <a href="#">42493</a> | <a href="#">42504</a> | <a href="#">42515</a> | <a href="#">42528</a> |
|                                          | (42433) | AATGTAATTCAATTTAATCATGTTTCCACACCCCATCGGTATTTGACCAAAGTCGCTGATTATCTGATCCTCGCCACAGCTTTTTGGTCGGAAGAT  |                       |                       |                       |                       |                       |                       |                       |                       |                       |
|                                          | (1)     | -----                                                                                             |                       |                       |                       |                       |                       |                       |                       |                       |                       |
|                                          |         | Section 444                                                                                       |                       |                       |                       |                       |                       |                       |                       |                       |                       |
| T4 NC 000866.4<br>SARS-CoV-2 NC_045512.2 | (42529) | <a href="#">42529</a>                                                                             | <a href="#">42537</a> | <a href="#">42548</a> | <a href="#">42559</a> | <a href="#">42570</a> | <a href="#">42581</a> | <a href="#">42592</a> | <a href="#">42603</a> | <a href="#">42624</a> |                       |
|                                          | (42529) | TTTTCTCATACTTCCCATCAATAATAACATCAACATATTTAAGCATTTCTAGTTGTTTAATATCTTCAAACCTTATATCCTGTCCACAACCAGATAT |                       |                       |                       |                       |                       |                       |                       |                       |                       |
|                                          | (1)     | -----                                                                                             |                       |                       |                       |                       |                       |                       |                       |                       |                       |
|                                          |         | Section 445                                                                                       |                       |                       |                       |                       |                       |                       |                       |                       |                       |
| T4 NC 000866.4<br>SARS-CoV-2 NC_045512.2 | (42625) | <a href="#">42625</a>                                                                             | <a href="#">42636</a> | <a href="#">42647</a> | <a href="#">42658</a> | <a href="#">42669</a> | <a href="#">42680</a> | <a href="#">42691</a> | <a href="#">42702</a> | <a href="#">42720</a> |                       |
|                                          | (42625) | CTTTCTCCGGAAATCTTGCTTTAACCCAAGAACTAAATTTGAAATCTCTTCTCGGTTCTGTGGATAAAGTGGGTCACCGCCGGTTAAGGTAAGGC   |                       |                       |                       |                       |                       |                       |                       |                       |                       |
|                                          | (1)     | -----                                                                                             |                       |                       |                       |                       |                       |                       |                       |                       |                       |
|                                          |         | Section 446                                                                                       |                       |                       |                       |                       |                       |                       |                       |                       |                       |
| T4 NC 000866.4<br>SARS-CoV-2 NC_045512.2 | (42721) | <a href="#">42721</a>                                                                             | <a href="#">42735</a> | <a href="#">42746</a> | <a href="#">42757</a> | <a href="#">42768</a> | <a href="#">42779</a> | <a href="#">42790</a> | <a href="#">42801</a> | <a href="#">42816</a> |                       |
|                                          | (42721) | CTTGATATACGATTTGCTTAAATGGGACGCAAGTTCTTTAACGGTATTCATAGTGAATAACTGTCCGTTACGAGCATTCCAAGTACTACGATTAT   |                       |                       |                       |                       |                       |                       |                       |                       |                       |
|                                          | (1)     | -----                                                                                             |                       |                       |                       |                       |                       |                       |                       |                       |                       |
|                                          |         | Section 447                                                                                       |                       |                       |                       |                       |                       |                       |                       |                       |                       |
| T4 NC 000866.4<br>SARS-CoV-2 NC_045512.2 | (42817) | <a href="#">42817</a>                                                                             | <a href="#">42823</a> | <a href="#">42834</a> | <a href="#">42845</a> | <a href="#">42856</a> | <a href="#">42867</a> | <a href="#">42878</a> | <a href="#">42889</a> | <a href="#">42900</a> | <a href="#">42912</a> |
|                                          | (42817) | AACAACTTCGCATTTATGCAAACATCCAGTGACGAAGAGAACGACCCTACATCCAGGGCCGTTAACGAAATCGCATGGATAAATTCTATCATAAT   |                       |                       |                       |                       |                       |                       |                       |                       |                       |
|                                          | (1)     | -----                                                                                             |                       |                       |                       |                       |                       |                       |                       |                       |                       |
|                                          |         | Section 448                                                                                       |                       |                       |                       |                       |                       |                       |                       |                       |                       |
| T4 NC 000866.4<br>SARS-CoV-2 NC_045512.2 | (42913) | <a href="#">42913</a>                                                                             | <a href="#">42922</a> | <a href="#">42933</a> | <a href="#">42944</a> | <a href="#">42955</a> | <a href="#">42966</a> | <a href="#">42977</a> | <a href="#">42988</a> | <a href="#">43008</a> |                       |
|                                          | (42913) | TCATCTTTATATTTCCAAGTATATCCCTTATGAATAGATTGAATTCCTTTGCAACATTTATAAACAGCAGAATGAAAAATCCTGCATTTCTTATT   |                       |                       |                       |                       |                       |                       |                       |                       |                       |
|                                          | (1)     | -----                                                                                             |                       |                       |                       |                       |                       |                       |                       |                       |                       |



## SARS-CoV-2 &amp; T4.apr

|                                          |                |                                                                                                            |       |       |       |       |       |       |       |
|------------------------------------------|----------------|------------------------------------------------------------------------------------------------------------|-------|-------|-------|-------|-------|-------|-------|
|                                          |                | Section 449                                                                                                |       |       |       |       |       |       |       |
| T4 NC 000866.4<br>SARS-CoV-2 NC_045512.2 | (43009)        | 43009                                                                                                      | 43021 | 43032 | 43043 | 43054 | 43065 | 43076 | 43087 |
|                                          | (43009)<br>(1) | TCAGTTGCTCCAGTTAGTTCTATTGTATTTCCGTCTGGTGAATAGCCAATAACCGTTTTGGTGTTAAAGCGATTTCTAGAACTATTTTTGATATGC<br>-----  |       |       |       |       |       |       |       |
|                                          |                | Section 450                                                                                                |       |       |       |       |       |       |       |
| T4 NC 000866.4<br>SARS-CoV-2 NC_045512.2 | (43105)        | 43105                                                                                                      | 43120 | 43131 | 43142 | 43153 | 43164 | 43175 | 43186 |
|                                          | (43105)<br>(1) | TCTTTATGATTAGTAGACAAAGTTCTTCCTGTTAGCCCATCAGATATCCTTTTTCCAAAATCATCAGGAAGAGTTACTTTAGACCTAGCTATGCTC<br>-----  |       |       |       |       |       |       |       |
|                                          |                | Section 451                                                                                                |       |       |       |       |       |       |       |
| T4 NC 000866.4<br>SARS-CoV-2 NC_045512.2 | (43201)        | 43201                                                                                                      | 43208 | 43219 | 43230 | 43241 | 43252 | 43263 | 43274 |
|                                          | (43201)<br>(1) | ATTAGCTTCTTAGTTTTATCGCTTCTTTTTGCGCCACGCTGATTTTCAAATTTCTTAGCTTTTGCATACGCGTATTGTGAAGAAGTAACTTTTCTA<br>-----  |       |       |       |       |       |       |       |
|                                          |                | Section 452                                                                                                |       |       |       |       |       |       |       |
| T4 NC 000866.4<br>SARS-CoV-2 NC_045512.2 | (43297)        | 43297                                                                                                      | 43307 | 43318 | 43329 | 43340 | 43351 | 43362 | 43373 |
|                                          | (43297)<br>(1) | TGCTTACTATTACTCATTATCCAATATGCATCATACATCTTCCACCATATATTTTAGCCAATAAATGGTGAGCAGTATAGTGGGCCTTATAAGTT<br>-----   |       |       |       |       |       |       |       |
|                                          |                | Section 453                                                                                                |       |       |       |       |       |       |       |
| T4 NC 000866.4<br>SARS-CoV-2 NC_045512.2 | (43393)        | 43393                                                                                                      | 43406 | 43417 | 43428 | 43439 | 43450 | 43461 | 43472 |
|                                          | (43393)<br>(1) | AAAAATACTAAGTTGTCTAAATCATCTGAACCAACCCATACTTCTTGGAATTATATGATGAAGTTCATACCCGGCTTTAGTTTGACGGGGCTTAGAT<br>----- |       |       |       |       |       |       |       |
|                                          |                | Section 454                                                                                                |       |       |       |       |       |       |       |
| T4 NC 000866.4<br>SARS-CoV-2 NC_045512.2 | (43489)        | 43489                                                                                                      | 43494 | 43505 | 43516 | 43527 | 43538 | 43549 | 43560 |
|                                          | (43489)<br>(1) | GGGTGTTTCAGCAGAATTAAGTAGATTGAATAGATTCTGTCATAATTCATTGGTGCTTAACCCTATGCATGATTTCTTTATTTTTACCGAGATTAA<br>-----  |       |       |       |       |       |       |       |
|                                          |                | Section 455                                                                                                |       |       |       |       |       |       |       |
| T4 NC 000866.4<br>SARS-CoV-2 NC_045512.2 | (43585)        | 43585                                                                                                      | 43593 | 43604 | 43615 | 43626 | 43637 | 43648 | 43659 |
|                                          | (43585)<br>(1) | ATCCGCGTTCGTTCCGATTTCCCAAATAACCACATGTTCTTCTTATGGTATTCATCTTTTTAGGATCAGTTTCTCCACAAATAGAACAACAAATC<br>-----   |       |       |       |       |       |       |       |

## SARS-CoV-2 &amp; T4.apr

|                        |         |                                                                                                     |       |       |       |       |       |       |       |
|------------------------|---------|-----------------------------------------------------------------------------------------------------|-------|-------|-------|-------|-------|-------|-------|
|                        |         | Section 456                                                                                         |       |       |       |       |       |       |       |
|                        | (43681) | 43681                                                                                               | 43692 | 43703 | 43714 | 43725 | 43736 | 43747 | 43758 |
| T4 NC 000866.4         | (43681) | CGTTTTTCAGTAGGAGTCATTTTCATGGGTACTTCCACATGTAAAACATTTATCTACTGGCATATTAACACCAAATAATCTAAATGCTGTGCAGCAT   |       |       |       |       |       |       |       |
| SARS-CoV-2 NC_045512.2 | (1)     | -----                                                                                               |       |       |       |       |       |       |       |
|                        |         | Section 457                                                                                         |       |       |       |       |       |       |       |
|                        | (43777) | 43777                                                                                               | 43791 | 43802 | 43813 | 43824 | 43835 | 43846 | 43857 |
| T4 NC 000866.4         | (43777) | AATCCCACACGGCCTCAAGACCTTTTAAGTTATTTTTTCATATCAGGAAGTTCAACATAAGAAATGTGACCACCTGTGCAATGAAATGATATGGCG    |       |       |       |       |       |       |       |
| SARS-CoV-2 NC_045512.2 | (1)     | -----                                                                                               |       |       |       |       |       |       |       |
|                        |         | Section 458                                                                                         |       |       |       |       |       |       |       |
|                        | (43873) | 43873                                                                                               | 43879 | 43890 | 43901 | 43912 | 43923 | 43934 | 43945 |
| T4 NC 000866.4         | (43873) | CTTCACGAGAAATCTTTTCAAACGGAGTAATATTTTCTTCTACTGAAACATGGAAACTGTTAGTGTACCAGCCTTTATCGGTAACATCTTTTACGC    |       |       |       |       |       |       |       |
| SARS-CoV-2 NC_045512.2 | (1)     | -----                                                                                               |       |       |       |       |       |       |       |
|                        |         | Section 459                                                                                         |       |       |       |       |       |       |       |
|                        | (43969) | 43969                                                                                               | 43978 | 43989 | 44000 | 44011 | 44022 | 44033 | 44044 |
| T4 NC 000866.4         | (43969) | TTCCATATTTTTCTGTATCGAGTTTACAGAAGCGATAACACAGGTTTTTCAGCAGGAGTCGAATATAAACTAAAGCAAATCCGGTTCCTTTTCAGTCC  |       |       |       |       |       |       |       |
| SARS-CoV-2 NC_045512.2 | (1)     | -----                                                                                               |       |       |       |       |       |       |       |
|                        |         | Section 460                                                                                         |       |       |       |       |       |       |       |
|                        | (44065) | 44065                                                                                               | 44077 | 44088 | 44099 | 44110 | 44121 | 44132 | 44143 |
| T4 NC 000866.4         | (44065) | ACTGTTTAAAGATGAGCATTTCATTTTAGTTAAAATTTCTCGTCCAATATCACGACCGACAAGAATATTCAATTCGTGAATACCAATGTATCCTAAAG  |       |       |       |       |       |       |       |
| SARS-CoV-2 NC_045512.2 | (1)     | -----                                                                                               |       |       |       |       |       |       |       |
|                        |         | Section 461                                                                                         |       |       |       |       |       |       |       |
|                        | (44161) | 44161                                                                                               | 44176 | 44187 | 44198 | 44209 | 44220 | 44231 | 44242 |
| T4 NC 000866.4         | (44161) | ACACTGAACCTTCTACCGTTTTTAAATAACTCAATTATGTCGTCATCAGGTTTAAAGACGAACCCCGAATGCACCTTCTTGGTAAAGAATAGGAGCAA  |       |       |       |       |       |       |       |
| SARS-CoV-2 NC_045512.2 | (1)     | -----                                                                                               |       |       |       |       |       |       |       |
|                        |         | Section 462                                                                                         |       |       |       |       |       |       |       |
|                        | (44257) | 44257                                                                                               | 44264 | 44275 | 44286 | 44297 | 44308 | 44319 | 44330 |
| T4 NC 000866.4         | (44257) | CAGTAGCTTTAACTCCTTTTAAAGGAACTAATTCTACACATCAAAGCTTCAAAACATAAATCCATTTCGTTTCATTAAATAGCTCAACAAATTTCTGTT |       |       |       |       |       |       |       |
| SARS-CoV-2 NC_045512.2 | (1)     | -----                                                                                               |       |       |       |       |       |       |       |

## SARS-CoV-2 &amp; T4.apr

|                                          |         |                                                                                                    |       |       |       |       |       |       |       |
|------------------------------------------|---------|----------------------------------------------------------------------------------------------------|-------|-------|-------|-------|-------|-------|-------|
|                                          |         | Section 463                                                                                        |       |       |       |       |       |       |       |
| T4 NC 000866.4<br>SARS-CoV-2 NC_045512.2 | (44353) | 44353                                                                                              | 44363 | 44374 | 44385 | 44396 | 44407 | 44418 | 44429 |
|                                          | (44353) | CATTGAACTGTGTTCCAATATAAGAATCTAACGCGATGCGAGGAAGATTTCAGTGTTACAACACCAAGATTATTGCGTCCATCAAGAATTTTCATTGC |       |       |       |       |       |       |       |
|                                          |         | Section 464                                                                                        |       |       |       |       |       |       |       |
| T4 NC 000866.4<br>SARS-CoV-2 NC_045512.2 | (44449) | 44449                                                                                              | 44462 | 44473 | 44484 | 44495 | 44506 | 44517 | 44528 |
|                                          | (44449) | CAGTCGAATCTTTCCATACGCTCAAGAACTACGGCAACCCATCGGAGAAACAGGAACAGATGAACCAGTGATAGCTTTATTGTTCTTAGCTGAA     |       |       |       |       |       |       |       |
|                                          |         | Section 465                                                                                        |       |       |       |       |       |       |       |
| T4 NC 000866.4<br>SARS-CoV-2 NC_045512.2 | (44545) | 44545                                                                                              | 44550 | 44561 | 44572 | 44583 | 44594 | 44605 | 44616 |
|                                          | (44545) | TAATATCAGGATACATCCTTTTGCTTGCGCACTCTAGAGCAAGCTGTTTAATATCATAGTTCGGATCGTCTTTATAAAGATTAACACCTTCTTCAA   |       |       |       |       |       |       |       |
|                                          |         | Section 466                                                                                        |       |       |       |       |       |       |       |
| T4 NC 000866.4<br>SARS-CoV-2 NC_045512.2 | (44641) | 44641                                                                                              | 44649 | 44660 | 44671 | 44682 | 44693 | 44704 | 44715 |
|                                          | (44641) | CGAACATAACAAGCTTAGGGAAAATAGGAGTTATCCCATCACGACCAAGACCTTTAATACGATTTTTTCAGAATTGCTTTCTGAATCATTCGTTTCAG |       |       |       |       |       |       |       |
|                                          |         | Section 467                                                                                        |       |       |       |       |       |       |       |
| T4 NC 000866.4<br>SARS-CoV-2 NC_045512.2 | (44737) | 44737                                                                                              | 44748 | 44759 | 44770 | 44781 | 44792 | 44803 | 44814 |
|                                          | (44737) | TCCAGTCAGTTCCCGTACCAAATGTAATTGTTACAAAAGGAGTCTGTCCGTTTGAACCTGAATAACGTGTTCACTTCATCAATGTGTTTCAGTAGAGT |       |       |       |       |       |       |       |
|                                          |         | Section 468                                                                                        |       |       |       |       |       |       |       |
| T4 NC 000866.4<br>SARS-CoV-2 NC_045512.2 | (44833) | 44833                                                                                              | 44847 | 44858 | 44869 | 44880 | 44891 | 44902 | 44913 |
|                                          | (44833) | TCGCTACTTCTCTACCCGTTTATATGAAACAATGTAATTTGGATAAATTGTCATCTAAACACAAATCTTTAATACGACTTGGGTGGAGTTTTAAATC  |       |       |       |       |       |       |       |
|                                          |         | Section 469                                                                                        |       |       |       |       |       |       |       |
| T4 NC 000866.4<br>SARS-CoV-2 NC_045512.2 | (44929) | 44929                                                                                              | 44935 | 44946 | 44957 | 44968 | 44979 | 44990 | 45001 |
|                                          | (44929) | TTTAGCAGCATCCACAAATGATTTATAGATATTGTCATTTATTTTAACATATTCTGGGACGGGATGAATTGTTATTTTTATATCTATAACATTTGG   |       |       |       |       |       |       |       |

## SARS-CoV-2 &amp; T4.apr

|                                          |                |                                                                                                              |       |       |       |       |       |       |       |       |       |
|------------------------------------------|----------------|--------------------------------------------------------------------------------------------------------------|-------|-------|-------|-------|-------|-------|-------|-------|-------|
|                                          |                | Section 470                                                                                                  |       |       |       |       |       |       |       |       |       |
| T4 NC 000866.4<br>SARS-CoV-2 NC_045512.2 | (45025)        | 45025                                                                                                        | 45034 | 45045 | 45056 | 45067 | 45078 | 45089 | 45100 | 45120 |       |
|                                          | (45025)<br>(1) | ATGATTACTAACCTGTTCTTCAGAGCATTTAAGAAATTTTGCAGCTGATTTAAACTTCTAAATTTATTTCCGGATTTTAAAGCTATAGAAACAGT<br>-----     |       |       |       |       |       |       |       |       |       |
|                                          |                | Section 471                                                                                                  |       |       |       |       |       |       |       |       |       |
| T4 NC 000866.4<br>SARS-CoV-2 NC_045512.2 | (45121)        | 45121                                                                                                        | 45133 | 45144 | 45155 | 45166 | 45177 | 45188 | 45199 | 45216 |       |
|                                          | (45121)<br>(1) | CTTTTATAGCCGTTCTACTACCAATATTATTTTTTAACATGAGCTTCACTTCTACTATTATTTTTTATAATGCTCAATCAATTTCTCTCGTATCTTATC<br>----- |       |       |       |       |       |       |       |       |       |
|                                          |                | Section 472                                                                                                  |       |       |       |       |       |       |       |       |       |
| T4 NC 000866.4<br>SARS-CoV-2 NC_045512.2 | (45217)        | 45217                                                                                                        | 45232 | 45243 | 45254 | 45265 | 45276 | 45287 | 45298 | 45312 |       |
|                                          | (45217)<br>(1) | TTTATGTTTTTAAAGATAAGATTTTACCTTTATGGGCATTACTAAGTTTTTGCTTATGTTCTTCTGAATCCGGATATTTGTTAAATTTATATCCACC<br>-----   |       |       |       |       |       |       |       |       |       |
|                                          |                | Section 473                                                                                                  |       |       |       |       |       |       |       |       |       |
| T4 NC 000866.4<br>SARS-CoV-2 NC_045512.2 | (45313)        | 45313                                                                                                        | 45320 | 45331 | 45342 | 45353 | 45364 | 45375 | 45386 | 45397 | 45408 |
|                                          | (45313)<br>(1) | TATAGATTTATTAAGAATAAATTCGTTATTAAATATTTTCTAATAAGCATTTCTTCATGTTTAAGGGCCGATTTCATAAGAATCAAAAACCTTGAAG<br>-----   |       |       |       |       |       |       |       |       |       |
|                                          |                | Section 474                                                                                                  |       |       |       |       |       |       |       |       |       |
| T4 NC 000866.4<br>SARS-CoV-2 NC_045512.2 | (45409)        | 45409                                                                                                        | 45419 | 45430 | 45441 | 45452 | 45463 | 45474 | 45485 | 45504 |       |
|                                          | (45409)<br>(1) | AATTATCCACTTAGCTTTATAATCTTTAAGCTTTTCTTTAACAAGCTTAGATGACGAATTGTATTCTTTCCAATTTGTATCTTTACCATATATAGT<br>-----    |       |       |       |       |       |       |       |       |       |
|                                          |                | Section 475                                                                                                  |       |       |       |       |       |       |       |       |       |
| T4 NC 000866.4<br>SARS-CoV-2 NC_045512.2 | (45505)        | 45505                                                                                                        | 45518 | 45529 | 45540 | 45551 | 45562 | 45573 | 45584 | 45600 |       |
|                                          | (45505)<br>(1) | TTTGAATTTTTTAAAAACCTATATAAAAAGACTTATCAGGAAATCTTACCATATAGGTAAATGCTACAGAATTGGCAATTTTTAAGCTTTTTCTTAA<br>-----   |       |       |       |       |       |       |       |       |       |
|                                          |                | Section 476                                                                                                  |       |       |       |       |       |       |       |       |       |
| T4 NC 000866.4<br>SARS-CoV-2 NC_045512.2 | (45601)        | 45601                                                                                                        | 45606 | 45617 | 45628 | 45639 | 45650 | 45661 | 45672 | 45683 | 45696 |
|                                          | (45601)<br>(1) | TTTCCATTTTCATCGTTTCACCTCGTATTCATATTTATACGAGGATAAACAGCTGCATGTCACCATGCAGTTCAGACTATATCTTCAACTCTTAGAG<br>-----   |       |       |       |       |       |       |       |       |       |

## SARS-CoV-2 &amp; T4.apr

|                                          |         |                                                                                                   |       |       |       |       |       |       |       |
|------------------------------------------|---------|---------------------------------------------------------------------------------------------------|-------|-------|-------|-------|-------|-------|-------|
|                                          |         | Section 477                                                                                       |       |       |       |       |       |       |       |
| T4 NC 000866.4<br>SARS-CoV-2 NC_045512.2 | (45697) | 45697                                                                                             | 45705 | 45716 | 45727 | 45738 | 45749 | 45760 | 45771 |
|                                          | (45697) | TTGTCTGCCGTTTCGGGTCGCTTGACCCCTACTCCCTTACATTCATCAGGGATAGTCGTTGGGCATTTACAGCTACTGCTGATTTAGCAACGGATTG |       |       |       |       |       |       |       |
|                                          |         | Section 478                                                                                       |       |       |       |       |       |       |       |
| T4 NC 000866.4<br>SARS-CoV-2 NC_045512.2 | (45793) | 45793                                                                                             | 45804 | 45815 | 45826 | 45837 | 45848 | 45859 | 45870 |
|                                          | (45793) | TCTCAGTGAGAGTTTCCCGTTTTAGGCAGATTTTACATGAGCTTGACTTACGTTAACTCATAAGCTTGGAATGCATCGTATACGTCTTTTTCTGTT  |       |       |       |       |       |       |       |
|                                          |         | Section 479                                                                                       |       |       |       |       |       |       |       |
| T4 NC 000866.4<br>SARS-CoV-2 NC_045512.2 | (45889) | 45889                                                                                             | 45903 | 45914 | 45925 | 45936 | 45947 | 45958 | 45969 |
|                                          | (45889) | TTAGATTGAGCATAATTCAACGCATCAGCGATTTGCCATTTTTCTGCATCCTCAATATGTTTTGCATAGGTGCGTTTAAACATAAGGAGAAAGTACT |       |       |       |       |       |       |       |
|                                          |         | Section 480                                                                                       |       |       |       |       |       |       |       |
| T4 NC 000866.4<br>SARS-CoV-2 NC_045512.2 | (45985) | 45985                                                                                             | 45991 | 46002 | 46013 | 46024 | 46035 | 46046 | 46057 |
|                                          | (45985) | TTATCTACATTGCAAAAAGTCGTTCCGCGTATTGGTGAGAAGCAACTTGCGCAGTAATTTGTGCCATAATTGCAGTAGCAACTCCAATTGATTTA   |       |       |       |       |       |       |       |
|                                          |         | Section 481                                                                                       |       |       |       |       |       |       |       |
| T4 NC 000866.4<br>SARS-CoV-2 NC_045512.2 | (46081) | 46081                                                                                             | 46090 | 46101 | 46112 | 46123 | 46134 | 46145 | 46156 |
|                                          | (46081) | GGAGTTTCAATCTGCGCATTACCAAGCTTAAATCCGTTTTCAAGCATTCTTTTAAATCTACTAAACAGCAATTAGTAAATGGAAGAGCAGGGGAA   |       |       |       |       |       |       |       |
|                                          |         | Section 482                                                                                       |       |       |       |       |       |       |       |
| T4 NC 000866.4<br>SARS-CoV-2 NC_045512.2 | (46177) | 46177                                                                                             | 46189 | 46200 | 46211 | 46222 | 46233 | 46244 | 46255 |
|                                          | (46177) | TAATCAATATCATGCACGTGAATAATTCCGCTTTCATGCGCTTTCATAATAAAAGACGGGACCATATTTTTGGCAATGTGTTTAGACACAATACCA  |       |       |       |       |       |       |       |
|                                          |         | Section 483                                                                                       |       |       |       |       |       |       |       |
| T4 NC 000866.4<br>SARS-CoV-2 NC_045512.2 | (46273) | 46273                                                                                             | 46288 | 46299 | 46310 | 46321 | 46332 | 46343 | 46354 |
|                                          | (46273) | GCCATAAGGTCCCGTTGAGTTGGAAAAACACGAGAATCTTTATTAGCATTCTCGTTTAAAAGGTCTTTATTAGTTTTATGAATTAATCCTTCAATT  |       |       |       |       |       |       |       |

## SARS-CoV-2 &amp; T4.apr

|                                          |         |                                                                                                   |       |       |       |       |       |       |       |       |       |
|------------------------------------------|---------|---------------------------------------------------------------------------------------------------|-------|-------|-------|-------|-------|-------|-------|-------|-------|
| Section 484                              |         |                                                                                                   |       |       |       |       |       |       |       |       |       |
| T4 NC 000866.4<br>SARS-CoV-2 NC_045512.2 | (46369) | 46369                                                                                             | 46376 | 46387 | 46398 | 46409 | 46420 | 46431 | 46442 | 46453 | 46464 |
|                                          | (46369) | TCTTTTTCAATTGTCATTTTAAACTCTTTCTAAGCTGCTTCTTGAATGAAGCTATTAATTGTGTTTTGGTGTGAGATTCATTATATTCAAATCCTC  |       |       |       |       |       |       |       |       |       |
|                                          | (1)     | -----                                                                                             |       |       |       |       |       |       |       |       |       |
| Section 485                              |         |                                                                                                   |       |       |       |       |       |       |       |       |       |
| T4 NC 000866.4<br>SARS-CoV-2 NC_045512.2 | (46465) | 46465                                                                                             | 46475 | 46486 | 46497 | 46508 | 46519 | 46530 | 46541 | 46560 |       |
|                                          | (46465) | TTTGAAGCATCTCGGCCATCATTTCTCTTTTCTTAAACGAGAAAATTCCTTTGATTTATCTCCAACAAAGTTAGGGTGAATATTATTTTGGGTGT   |       |       |       |       |       |       |       |       |       |
|                                          | (1)     | -----                                                                                             |       |       |       |       |       |       |       |       |       |
| Section 486                              |         |                                                                                                   |       |       |       |       |       |       |       |       |       |
| T4 NC 000866.4<br>SARS-CoV-2 NC_045512.2 | (46561) | 46561                                                                                             | 46574 | 46585 | 46596 | 46607 | 46618 | 46629 | 46640 | 46656 |       |
|                                          | (46561) | AATCGGATTTTAAATAAGTAAGTAAATTTTCTAACCATTCAAGATAATCAACACCTTGTCCCTTTAAGCCAGAACGATTAAATTTATGCTTCATTT  |       |       |       |       |       |       |       |       |       |
|                                          | (1)     | -----                                                                                             |       |       |       |       |       |       |       |       |       |
| Section 487                              |         |                                                                                                   |       |       |       |       |       |       |       |       |       |
| T4 NC 000866.4<br>SARS-CoV-2 NC_045512.2 | (46657) | 46657                                                                                             | 46662 | 46673 | 46684 | 46695 | 46706 | 46717 | 46728 | 46739 | 46752 |
|                                          | (46657) | GACCTTCTGCAGCATTCGCATAGATTACAAAGCAATCCACGCACCTTTCTTGCTTTTGGTCCATTTAATTCATGGTCATGGTCGAGGTGATTAGCTT |       |       |       |       |       |       |       |       |       |
|                                          | (1)     | -----                                                                                             |       |       |       |       |       |       |       |       |       |
| Section 488                              |         |                                                                                                   |       |       |       |       |       |       |       |       |       |
| T4 NC 000866.4<br>SARS-CoV-2 NC_045512.2 | (46753) | 46753                                                                                             | 46761 | 46772 | 46783 | 46794 | 46805 | 46816 | 46827 | 46848 |       |
|                                          | (46753) | GAACATCAGGATTTAGTTCTCGTTGGCAAATTAAGCATTTACCGTTTTGTGCATCATAAAATTTCTGTTTTTCTTCTTTGTATAATTTGCCAGTCA  |       |       |       |       |       |       |       |       |       |
|                                          | (1)     | -----                                                                                             |       |       |       |       |       |       |       |       |       |
| Section 489                              |         |                                                                                                   |       |       |       |       |       |       |       |       |       |
| T4 NC 000866.4<br>SARS-CoV-2 NC_045512.2 | (46849) | 46849                                                                                             | 46860 | 46871 | 46882 | 46893 | 46904 | 46915 | 46926 | 46944 |       |
|                                          | (46849) | ATAACATAATAAACCTTACCTTAAATAGATAAGGGTATTTATTATTTTCAAGTATTGTAAAACATTTGATGCAATCGCTTATATTGCTGAATCAT   |       |       |       |       |       |       |       |       |       |
|                                          | (1)     | -----                                                                                             |       |       |       |       |       |       |       |       |       |
| Section 490                              |         |                                                                                                   |       |       |       |       |       |       |       |       |       |
| T4 NC 000866.4<br>SARS-CoV-2 NC_045512.2 | (46945) | 46945                                                                                             | 46959 | 46970 | 46981 | 46992 | 47003 | 47014 | 47025 | 47040 |       |
|                                          | (46945) | TCGGTCAGAAAAAGAAATTTGAGTTTCAAGCCATTCAATGTACTCTGCGGCAGCTTGCATTAAATTTCTTCATAGCCATCGTTATTTTCTTGTGC   |       |       |       |       |       |       |       |       |       |
|                                          | (1)     | -----                                                                                             |       |       |       |       |       |       |       |       |       |

## SARS-CoV-2 &amp; T4.apr

|                        |         |                                                                                                    |       |       |       |       |       |       |       |       |       |
|------------------------|---------|----------------------------------------------------------------------------------------------------|-------|-------|-------|-------|-------|-------|-------|-------|-------|
|                        |         | Section 491                                                                                        |       |       |       |       |       |       |       |       |       |
|                        | (47041) | 47041                                                                                              | 47047 | 47058 | 47069 | 47080 | 47091 | 47102 | 47113 | 47124 | 47136 |
| T4 NC 000866.4         | (47041) | AGCTAATTTAGCTAATGCGTATGAAATACGTTACCTTGAAAATCGGCTTTAGGCTTCTGAACAACCTTGATTAGTTTCGCTCTACAACCTTCTTCAAT |       |       |       |       |       |       |       |       |       |
| SARS-CoV-2 NC_045512.2 | (1)     | -----                                                                                              |       |       |       |       |       |       |       |       |       |
|                        |         | Section 492                                                                                        |       |       |       |       |       |       |       |       |       |
|                        | (47137) | 47137                                                                                              | 47146 | 47157 | 47168 | 47179 | 47190 | 47201 | 47212 |       | 47232 |
| T4 NC 000866.4         | (47137) | TTCGCCATTTTCTACTGATTTCAGTATTCACAAACACCAATACGTAATTGGCTTATCGTAGATGTTAATAATCTTTCCATCAGAAAGTTCAATTTTC  |       |       |       |       |       |       |       |       |       |
| SARS-CoV-2 NC_045512.2 | (1)     | -----                                                                                              |       |       |       |       |       |       |       |       |       |
|                        |         | Section 493                                                                                        |       |       |       |       |       |       |       |       |       |
|                        | (47233) | 47233                                                                                              | 47245 | 47256 | 47267 | 47278 | 47289 | 47300 | 47311 |       | 47328 |
| T4 NC 000866.4         | (47233) | AATAATTCCAGTGTCAGGCTCTATATCATCTTCACATTCTTTTACAAGTTCACGAACCTTTAAAGACAGTACCTGCACTAAGTTCCGGCCAGTAATT  |       |       |       |       |       |       |       |       |       |
| SARS-CoV-2 NC_045512.2 | (1)     | -----                                                                                              |       |       |       |       |       |       |       |       |       |
|                        |         | Section 494                                                                                        |       |       |       |       |       |       |       |       |       |
|                        | (47329) | 47329                                                                                              | 47344 | 47355 | 47366 | 47377 | 47388 | 47399 | 47410 |       | 47424 |
| T4 NC 000866.4         | (47329) | ACACAGCCCTGTATCAGCAGGATTAATTCTAAACCATTTATCTACTGTAATCATGTCCCATCTCCATATCAATTAAGTCATTTATCGTTGGTTTCAT  |       |       |       |       |       |       |       |       |       |
| SARS-CoV-2 NC_045512.2 | (1)     | -----                                                                                              |       |       |       |       |       |       |       |       |       |
|                        |         | Section 495                                                                                        |       |       |       |       |       |       |       |       |       |
|                        | (47425) | 47425                                                                                              | 47432 | 47443 | 47454 | 47465 | 47476 | 47487 | 47498 | 47509 | 47520 |
| T4 NC 000866.4         | (47425) | TATACACCGTTTCTTCATCAGTGTAACCGGTTCTTCCGGCTCTGGCTCTACAGTTTCCCATCTAGCCGCCACCAAGGTTTTATAGCGTAATCCA     |       |       |       |       |       |       |       |       |       |
| SARS-CoV-2 NC_045512.2 | (1)     | -----                                                                                              |       |       |       |       |       |       |       |       |       |
|                        |         | Section 496                                                                                        |       |       |       |       |       |       |       |       |       |
|                        | (47521) | 47521                                                                                              | 47531 | 47542 | 47553 | 47564 | 47575 | 47586 | 47597 |       | 47616 |
| T4 NC 000866.4         | (47521) | TTCTCGTACTGTCTGAGTTACTACACGTTCTCGAAGCTCAACCAGTTCAACAGTAGGAACTGCATAATACCAGTCAGAATGGTAAGAACCTGAGCG   |       |       |       |       |       |       |       |       |       |
| SARS-CoV-2 NC_045512.2 | (1)     | -----                                                                                              |       |       |       |       |       |       |       |       |       |
|                        |         | Section 497                                                                                        |       |       |       |       |       |       |       |       |       |
|                        | (47617) | 47617                                                                                              | 47630 | 47641 | 47652 | 47663 | 47674 | 47685 | 47696 |       | 47712 |
| T4 NC 000866.4         | (47617) | AGATTCATTTACAGCCACATGTACATTATGTTTTGGACTAAAATAAACACACTGACGATATTGGCATTTACCATCTTGCACCCAGTCTTCTATTTTC  |       |       |       |       |       |       |       |       |       |
| SARS-CoV-2 NC_045512.2 | (1)     | -----                                                                                              |       |       |       |       |       |       |       |       |       |

## SARS-CoV-2 &amp; T4.apr

|                                          |         |                                                                                                     |       |       |       |       |       |       |       |       |       |
|------------------------------------------|---------|-----------------------------------------------------------------------------------------------------|-------|-------|-------|-------|-------|-------|-------|-------|-------|
|                                          |         | Section 498                                                                                         |       |       |       |       |       |       |       |       |       |
| T4 NC 000866.4<br>SARS-CoV-2 NC_045512.2 | (47713) | 47713                                                                                               | 47718 | 47729 | 47740 | 47751 | 47762 | 47773 | 47784 | 47795 | 47808 |
|                                          | (47713) | GATAGGTTTAAAGATAGTCGGAAAAATCGAAATCATAGTTTTCCGAAAATGCATCATGGTCTTCAATGATTTTCGCTCAGAACTGCATCAACATCTAA  |       |       |       |       |       |       |       |       |       |
|                                          | (1)     | -----                                                                                               |       |       |       |       |       |       |       |       |       |
|                                          |         | Section 499                                                                                         |       |       |       |       |       |       |       |       |       |
| T4 NC 000866.4<br>SARS-CoV-2 NC_045512.2 | (47809) | 47809                                                                                               | 47817 | 47828 | 47839 | 47850 | 47861 | 47872 | 47883 |       | 47904 |
|                                          | (47809) | TTTATTTTCAATATTCATTTTTTCACACCACCAACTGCTTACTTCAAAATCGGGTTCGCCATGTTCCAGAACCCAGGGGCCGATAGGAATCCACTTA   |       |       |       |       |       |       |       |       |       |
|                                          | (1)     | -----                                                                                               |       |       |       |       |       |       |       |       |       |
|                                          |         | Section 500                                                                                         |       |       |       |       |       |       |       |       |       |
| T4 NC 000866.4<br>SARS-CoV-2 NC_045512.2 | (47905) | 47905                                                                                               | 47916 | 47927 | 47938 | 47949 | 47960 | 47971 | 47982 |       | 48000 |
|                                          | (47905) | CCTTCATCGGTGACGTCATATTCCTTCGGATTTAAGCCCCAACGTATCGCCATTCGACTTCATAAGCGGTACCACCGATTACAACGTGTGTTCTCGCCA |       |       |       |       |       |       |       |       |       |
|                                          | (1)     | -----                                                                                               |       |       |       |       |       |       |       |       |       |
|                                          |         | Section 501                                                                                         |       |       |       |       |       |       |       |       |       |
| T4 NC 000866.4<br>SARS-CoV-2 NC_045512.2 | (48001) | 48001                                                                                               | 48015 | 48026 | 48037 | 48048 | 48059 | 48070 | 48081 |       | 48096 |
|                                          | (48001) | TACGGGTTAGACACAACAAAGTCTATACCTTCTGCTTTAGCTAACCAAATCATGTATTCATAGAGTTTATATTCCAGGTCGCCTTCTGTTCCATCG    |       |       |       |       |       |       |       |       |       |
|                                          | (1)     | -----                                                                                               |       |       |       |       |       |       |       |       |       |
|                                          |         | Section 502                                                                                         |       |       |       |       |       |       |       |       |       |
| T4 NC 000866.4<br>SARS-CoV-2 NC_045512.2 | (48097) | 48097                                                                                               | 48103 | 48114 | 48125 | 48136 | 48147 | 48158 | 48169 | 48180 | 48192 |
|                                          | (48097) | CCTAGAAAAATAATTTGTTTCATTTAATTCATCATTTAAAGTATTCCCGCAATTGGTCAAATCCACCAATATGACTTCCATCAGGAGCAAATACCT    |       |       |       |       |       |       |       |       |       |
|                                          | (1)     | -----                                                                                               |       |       |       |       |       |       |       |       |       |
|                                          |         | Section 503                                                                                         |       |       |       |       |       |       |       |       |       |
| T4 NC 000866.4<br>SARS-CoV-2 NC_045512.2 | (48193) | 48193                                                                                               | 48202 | 48213 | 48224 | 48235 | 48246 | 48257 | 48268 |       | 48288 |
|                                          | (48193) | GAGGCATTGTTAAGCCGATTTGAGTATCACGACCTAGTTTAGTCAGAAGCTCAGCAATTTTCTCATCATCAAAAACACCTTTTTCCGGCATAATGT    |       |       |       |       |       |       |       |       |       |
|                                          | (1)     | -----                                                                                               |       |       |       |       |       |       |       |       |       |
|                                          |         | Section 504                                                                                         |       |       |       |       |       |       |       |       |       |
| T4 NC 000866.4<br>SARS-CoV-2 NC_045512.2 | (48289) | 48289                                                                                               | 48301 | 48312 | 48323 | 48334 | 48345 | 48356 | 48367 |       | 48384 |
|                                          | (48289) | TGATAAATTCAAACGGCTGTTTCTTCACAGTCAAAAGACGTTTTGCATTATCGCAATACACACATTTATGAATGTTGCTATCATAACCATATACTT    |       |       |       |       |       |       |       |       |       |
|                                          | (1)     | -----                                                                                               |       |       |       |       |       |       |       |       |       |



## SARS-CoV-2 &amp; T4.apr

|                                          |         |                                                                                                     |       |       |       |       |       |       |       |             |
|------------------------------------------|---------|-----------------------------------------------------------------------------------------------------|-------|-------|-------|-------|-------|-------|-------|-------------|
|                                          |         |                                                                                                     |       |       |       |       |       |       |       | Section 505 |
| T4 NC 000866.4<br>SARS-CoV-2 NC_045512.2 | (48385) | 48385                                                                                               | 48400 | 48411 | 48422 | 48433 | 48444 | 48455 | 48466 | 48480       |
|                                          | (48385) | TAAACATATTATTTCCTTAATTCCTAGTACTTGTTTAAAAGTCTCGTCGTAATCAAGACTTTGGCCCGTTTGTTCTTTATGCTTGTATATAATATCA   |       |       |       |       |       |       |       |             |
|                                          | (1)     | -----                                                                                               |       |       |       |       |       |       |       |             |
|                                          |         |                                                                                                     |       |       |       |       |       |       |       | Section 506 |
| T4 NC 000866.4<br>SARS-CoV-2 NC_045512.2 | (48481) | 48481                                                                                               | 48488 | 48499 | 48510 | 48521 | 48532 | 48543 | 48554 | 48565 48576 |
|                                          | (48481) | CTTACTTCTGATAGCATATTTTTATATGAACGAGTTAAAGCAGATTTAAGCACGCTGTATCTATCAGGAAATTTACCGTGTTTCATTATAATAAGCT   |       |       |       |       |       |       |       |             |
|                                          | (1)     | -----                                                                                               |       |       |       |       |       |       |       |             |
|                                          |         |                                                                                                     |       |       |       |       |       |       |       | Section 507 |
| T4 NC 000866.4<br>SARS-CoV-2 NC_045512.2 | (48577) | 48577                                                                                               | 48587 | 48598 | 48609 | 48620 | 48631 | 48642 | 48653 | 48672       |
|                                          | (48577) | ATTGCTAATTCACGGACTGCCTTTTCAGCAGTCTCCATATATTCTTTACGCTTTGTCTATTTCTTCTCGGTCAAATCGGTGTTTACAATGGCGACA    |       |       |       |       |       |       |       |             |
|                                          | (1)     | -----                                                                                               |       |       |       |       |       |       |       |             |
|                                          |         |                                                                                                     |       |       |       |       |       |       |       | Section 508 |
| T4 NC 000866.4<br>SARS-CoV-2 NC_045512.2 | (48673) | 48673                                                                                               | 48686 | 48697 | 48708 | 48719 | 48730 | 48741 | 48752 | 48768       |
|                                          | (48673) | TTTATAACGAAGATTATTAGTCTGCCAATGGACCAATTGCACCTGTTTCAGTTCCACATTTCAGGGCAATTAGGAACGTTTTTAGAAGCCCTTTTCGCG |       |       |       |       |       |       |       |             |
|                                          | (1)     | -----                                                                                               |       |       |       |       |       |       |       |             |
|                                          |         |                                                                                                     |       |       |       |       |       |       |       | Section 509 |
| T4 NC 000866.4<br>SARS-CoV-2 NC_045512.2 | (48769) | 48769                                                                                               | 48774 | 48785 | 48796 | 48807 | 48818 | 48829 | 48840 | 48851 48864 |
|                                          | (48769) | ACGTTCAACCATGACCATTACAGAATCCCAATTAACAGGAGGGCTATAATCATCACAACCATAAATCTTTCCACGCATTTCCAGATCGTCTTCTTC    |       |       |       |       |       |       |       |             |
|                                          | (1)     | -----                                                                                               |       |       |       |       |       |       |       |             |
|                                          |         |                                                                                                     |       |       |       |       |       |       |       | Section 510 |
| T4 NC 000866.4<br>SARS-CoV-2 NC_045512.2 | (48865) | 48865                                                                                               | 48873 | 48884 | 48895 | 48906 | 48917 | 48928 | 48939 | 48960       |
|                                          | (48865) | ACCAGCCATAATAATTTTAATTAGACTAGAATTACTTGAAGCTGCAATGTCTTCTAATAGACGCTTTTTTCATTTCAATACCTCAATAGCATTACGT   |       |       |       |       |       |       |       |             |
|                                          | (1)     | -----                                                                                               |       |       |       |       |       |       |       |             |
|                                          |         |                                                                                                     |       |       |       |       |       |       |       | Section 511 |
| T4 NC 000866.4<br>SARS-CoV-2 NC_045512.2 | (48961) | 48961                                                                                               | 48972 | 48983 | 48994 | 49005 | 49016 | 49027 | 49038 | 49056       |
|                                          | (48961) | AAACCATTGCTTTGGCGGTTAAATCCTTAAGAACTTTAGTATGCTCTTCAATCTGTTTTTCAACTTCAATCAAACGGGTACTGAGATATTCGCGT     |       |       |       |       |       |       |       |             |
|                                          | (1)     | -----                                                                                               |       |       |       |       |       |       |       |             |

## SARS-CoV-2 &amp; T4.apr

|                                          |         |                                                                                                    |       |       |       |       |       |       |       |       |       |
|------------------------------------------|---------|----------------------------------------------------------------------------------------------------|-------|-------|-------|-------|-------|-------|-------|-------|-------|
|                                          |         | Section 512                                                                                        |       |       |       |       |       |       |       |       |       |
| T4 NC 000866.4<br>SARS-CoV-2 NC_045512.2 | (49057) | 49057                                                                                              | 49071 | 49082 | 49093 | 49104 | 49115 | 49126 | 49137 | 49152 |       |
|                                          | (49057) | TCTTCTTTCATAGTATCATTTCCCATGATTGGGCTTTGGCGTAGGTTTAAATTTATTAGGGTCCTTTAACTTAATAACAACCTTTAGTTTCAAACAGT |       |       |       |       |       |       |       |       |       |
|                                          |         | -----                                                                                              |       |       |       |       |       |       |       |       |       |
|                                          |         | Section 513                                                                                        |       |       |       |       |       |       |       |       |       |
| T4 NC 000866.4<br>SARS-CoV-2 NC_045512.2 | (49153) | 49153                                                                                              | 49159 | 49170 | 49181 | 49192 | 49203 | 49214 | 49225 | 49236 | 49248 |
|                                          | (49153) | GAAAGACCATAATTTCGTATTATCATCAAAGGATTCAACTACGTCCATTTTAGACAATAACGTACGAAGTTTATAAGTCAAAGAACGAATCGTTTTA  |       |       |       |       |       |       |       |       |       |
|                                          |         | -----                                                                                              |       |       |       |       |       |       |       |       |       |
|                                          |         | Section 514                                                                                        |       |       |       |       |       |       |       |       |       |
| T4 NC 000866.4<br>SARS-CoV-2 NC_045512.2 | (49249) | 49249                                                                                              | 49258 | 49269 | 49280 | 49291 | 49302 | 49313 | 49324 | 49344 |       |
|                                          | (49249) | TTATGTTTATTAGCTTCACATGGTTTCATATATGGAAGATTTTTATATATTTTCATGCGGAGCACAAACAATAATTAACAATTCAAATGGTCCATT   |       |       |       |       |       |       |       |       |       |
|                                          |         | -----                                                                                              |       |       |       |       |       |       |       |       |       |
|                                          |         | Section 515                                                                                        |       |       |       |       |       |       |       |       |       |
| T4 NC 000866.4<br>SARS-CoV-2 NC_045512.2 | (49345) | 49345                                                                                              | 49357 | 49368 | 49379 | 49390 | 49401 | 49412 | 49423 | 49440 |       |
|                                          | (49345) | TGAGATGATGGAATGAATTTAGCCGTAACCCAATCTTTTACATTTACATTAATAGTACGATCATCGCCATGACAAAACAGTCTACGAGAATGCTTA   |       |       |       |       |       |       |       |       |       |
|                                          |         | -----                                                                                              |       |       |       |       |       |       |       |       |       |
|                                          |         | Section 516                                                                                        |       |       |       |       |       |       |       |       |       |
| T4 NC 000866.4<br>SARS-CoV-2 NC_045512.2 | (49441) | 49441                                                                                              | 49456 | 49467 | 49478 | 49489 | 49500 | 49511 | 49522 | 49536 |       |
|                                          | (49441) | AAAAGCATATTCACATTATTATTAAATTCGTGTGAAAACCTCACTGGCAAATTTTCTTTACTATCTTTAGAAAACCATTCTTCTAAATAAGTTCTT   |       |       |       |       |       |       |       |       |       |
|                                          |         | -----                                                                                              |       |       |       |       |       |       |       |       |       |
|                                          |         | Section 517                                                                                        |       |       |       |       |       |       |       |       |       |
| T4 NC 000866.4<br>SARS-CoV-2 NC_045512.2 | (49537) | 49537                                                                                              | 49544 | 49555 | 49566 | 49577 | 49588 | 49599 | 49610 | 49621 | 49632 |
|                                          | (49537) | TTCACGTCGTTAATAATATTAAATGTAACAACATTATCATTTGATACATTAGTCTCAATGTAGCTTGGATACATAAATTTTTTAACATTATTAACA   |       |       |       |       |       |       |       |       |       |
|                                          |         | -----                                                                                              |       |       |       |       |       |       |       |       |       |
|                                          |         | Section 518                                                                                        |       |       |       |       |       |       |       |       |       |
| T4 NC 000866.4<br>SARS-CoV-2 NC_045512.2 | (49633) | 49633                                                                                              | 49643 | 49654 | 49665 | 49676 | 49687 | 49698 | 49709 | 49728 |       |
|                                          | (49633) | GCTATCACAGAAGATAGTAATCGGGAACGTTTGAACCACTCGAGCAAAGAACCAAGAGAATGTGAATACGCATTTTGTGTATCTTTACAAATATGG   |       |       |       |       |       |       |       |       |       |
|                                          |         | -----                                                                                              |       |       |       |       |       |       |       |       |       |

## SARS-CoV-2 &amp; T4.apr

|                                          |         |                                                                                                    |       |       |       |       |       |       |       |       |       |
|------------------------------------------|---------|----------------------------------------------------------------------------------------------------|-------|-------|-------|-------|-------|-------|-------|-------|-------|
|                                          |         | Section 519                                                                                        |       |       |       |       |       |       |       |       |       |
| T4 NC 000866.4<br>SARS-CoV-2 NC_045512.2 | (49729) | 49729                                                                                              | 49742 | 49753 | 49764 | 49775 | 49786 | 49797 | 49808 | 49824 |       |
|                                          | (49729) | TTTTCCCATCCAATATAGTCTAAAAAATCACGAAGAATATTATTGATTACTTCTCTATGTCCTTTCTGATAATCACGATGTTTAGTAATAAGACTG   |       |       |       |       |       |       |       |       |       |
|                                          |         | -----                                                                                              |       |       |       |       |       |       |       |       |       |
|                                          |         | Section 520                                                                                        |       |       |       |       |       |       |       |       |       |
| T4 NC 000866.4<br>SARS-CoV-2 NC_045512.2 | (49825) | 49825                                                                                              | 49830 | 49841 | 49852 | 49863 | 49874 | 49885 | 49896 | 49907 | 49920 |
|                                          | (49825) | TCAAAAATAATCAATATAATGTTTACGAGTTTTTCATGTTCTTCTCACTTGGTTAATGATTTATACTCCGAGCCATCCTTGGCTTTAAATTTTACTTA |       |       |       |       |       |       |       |       |       |
|                                          |         | -----                                                                                              |       |       |       |       |       |       |       |       |       |
|                                          |         | Section 521                                                                                        |       |       |       |       |       |       |       |       |       |
| T4 NC 000866.4<br>SARS-CoV-2 NC_045512.2 | (49921) | 49921                                                                                              | 49929 | 49940 | 49951 | 49962 | 49973 | 49984 | 49995 | 50016 |       |
|                                          | (49921) | ATTAAGTGCAGGCTTGTCTAGACGATCAAGACGATTAACGGATTCTTCCCAAATCTTTTAGCCTGCTCATATTCTTTCTGCGCTTTATTAGAA      |       |       |       |       |       |       |       |       |       |
|                                          |         | -----                                                                                              |       |       |       |       |       |       |       |       |       |
|                                          |         | Section 522                                                                                        |       |       |       |       |       |       |       |       |       |
| T4 NC 000866.4<br>SARS-CoV-2 NC_045512.2 | (50017) | 50017                                                                                              | 50028 | 50039 | 50050 | 50061 | 50072 | 50083 | 50094 | 50112 |       |
|                                          | (50017) | ATTTCTAGAACTTCTTTATAAGCTTTTTCTAGTGCAATAACTTCTGGACGAATTTCTATCGGTTTCAGGTGAATCATCAAGACATTCCATTAGTTCC  |       |       |       |       |       |       |       |       |       |
|                                          |         | -----                                                                                              |       |       |       |       |       |       |       |       |       |
|                                          |         | Section 523                                                                                        |       |       |       |       |       |       |       |       |       |
| T4 NC 000866.4<br>SARS-CoV-2 NC_045512.2 | (50113) | 50113                                                                                              | 50127 | 50138 | 50149 | 50160 | 50171 | 50182 | 50193 | 50208 |       |
|                                          | (50113) | TCAAGGGTAGTTTCTTCTTTAGGAGTATTCACAATTTTCATCACATTTTGTGGTAAATTTCTTTACTAGTAGGTGAATAAGCACATTTCACTTCA    |       |       |       |       |       |       |       |       |       |
|                                          |         | -----                                                                                              |       |       |       |       |       |       |       |       |       |
|                                          |         | Section 524                                                                                        |       |       |       |       |       |       |       |       |       |
| T4 NC 000866.4<br>SARS-CoV-2 NC_045512.2 | (50209) | 50209                                                                                              | 50215 | 50226 | 50237 | 50248 | 50259 | 50270 | 50281 | 50292 | 50304 |
|                                          | (50209) | CGAAGGCTAATTACGAGTTTATATCCTTCCCAACCGCATATATTCTTAAAAGGATATGTATGAATATTTTCTACTGTTTCCATACAAAGTAATGCG   |       |       |       |       |       |       |       |       |       |
|                                          |         | -----                                                                                              |       |       |       |       |       |       |       |       |       |
|                                          |         | Section 525                                                                                        |       |       |       |       |       |       |       |       |       |
| T4 NC 000866.4<br>SARS-CoV-2 NC_045512.2 | (50305) | 50305                                                                                              | 50314 | 50325 | 50336 | 50347 | 50358 | 50369 | 50380 | 50400 |       |
|                                          | (50305) | GTCTCTAATTGACGAGTTATAGTGCTAGCAATTGAGAAAAATTTATTAATATTCTTTTGGTTAGTTTCTGGTGTAATAAATCCATAATTCACAAAA   |       |       |       |       |       |       |       |       |       |
|                                          |         | -----                                                                                              |       |       |       |       |       |       |       |       |       |

## SARS-CoV-2 &amp; T4.apr

|                                          |         |                                                                                                    |       |       |       |       |       |       |       |       |       |
|------------------------------------------|---------|----------------------------------------------------------------------------------------------------|-------|-------|-------|-------|-------|-------|-------|-------|-------|
|                                          |         | Section 526                                                                                        |       |       |       |       |       |       |       |       |       |
| T4 NC 000866.4<br>SARS-CoV-2 NC_045512.2 | (50401) | 50401                                                                                              | 50413 | 50424 | 50435 | 50446 | 50457 | 50468 | 50479 | 50496 |       |
|                                          | (50401) | ATAGATACTTTATTTTATCAAGTTCATATTCTTTTATGATAATCATATCAGAAGCCAAAGGATGAATTTGACGATAATCGCCATAACATAATTTA    |       |       |       |       |       |       |       |       |       |
|                                          |         | -----                                                                                              |       |       |       |       |       |       |       |       |       |
|                                          |         | Section 527                                                                                        |       |       |       |       |       |       |       |       |       |
| T4 NC 000866.4<br>SARS-CoV-2 NC_045512.2 | (50497) | 50497                                                                                              | 50512 | 50523 | 50534 | 50545 | 50556 | 50567 | 50578 | 50592 |       |
|                                          | (50497) | GAAGCTGATTTTAGAATTTGCTTCTTGAAAAGTCTGAAATTACTAATCCAACGACGAGTAAAAATATTCTCAGGGTCTTCTTTATTATTGAGATGA   |       |       |       |       |       |       |       |       |       |
|                                          |         | -----                                                                                              |       |       |       |       |       |       |       |       |       |
|                                          |         | Section 528                                                                                        |       |       |       |       |       |       |       |       |       |
| T4 NC 000866.4<br>SARS-CoV-2 NC_045512.2 | (50593) | 50593                                                                                              | 50600 | 50611 | 50622 | 50633 | 50644 | 50655 | 50666 | 50677 | 50688 |
|                                          | (50593) | TAAGAATTAACATCACCGAACCAATTATATCCTACTACATCTTTAGTTCGTTTAATTTCTTTCCCAAATTACCAAGAATATCCCGATTAAACCAA    |       |       |       |       |       |       |       |       |       |
|                                          |         | -----                                                                                              |       |       |       |       |       |       |       |       |       |
|                                          |         | Section 529                                                                                        |       |       |       |       |       |       |       |       |       |
| T4 NC 000866.4<br>SARS-CoV-2 NC_045512.2 | (50689) | 50689                                                                                              | 50699 | 50710 | 50721 | 50732 | 50743 | 50754 | 50765 | 50784 |       |
|                                          | (50689) | TATGAAAGAAGACGAGACTCTTTAAAGGTTTTCTTGATAACATCTTTATCTACACGGCTAGAAATTTTACGAATTTTCATGAATAAATTTAGTAGAA  |       |       |       |       |       |       |       |       |       |
|                                          |         | -----                                                                                              |       |       |       |       |       |       |       |       |       |
|                                          |         | Section 530                                                                                        |       |       |       |       |       |       |       |       |       |
| T4 NC 000866.4<br>SARS-CoV-2 NC_045512.2 | (50785) | 50785                                                                                              | 50798 | 50809 | 50820 | 50831 | 50842 | 50853 | 50864 | 50880 |       |
|                                          | (50785) | GAAACAATACTTGCAATCAACACTATTGAGCCACTGATTGATAATAGAAAGAAGCTATTTTGGCCAAACATCGGTATAGCTTTATCATCAATAACG   |       |       |       |       |       |       |       |       |       |
|                                          |         | -----                                                                                              |       |       |       |       |       |       |       |       |       |
|                                          |         | Section 531                                                                                        |       |       |       |       |       |       |       |       |       |
| T4 NC 000866.4<br>SARS-CoV-2 NC_045512.2 | (50881) | 50881                                                                                              | 50886 | 50897 | 50908 | 50919 | 50930 | 50941 | 50952 | 50963 | 50976 |
|                                          | (50881) | CTATTGAATGATTTGATATATTCGTTACGAGTCATATTAATCTCCTCAGTAGAAAGTAAGAACATTATACCACATCCTTGTGGCAAAGTAACTAG    |       |       |       |       |       |       |       |       |       |
|                                          |         | -----                                                                                              |       |       |       |       |       |       |       |       |       |
|                                          |         | Section 532                                                                                        |       |       |       |       |       |       |       |       |       |
| T4 NC 000866.4<br>SARS-CoV-2 NC_045512.2 | (50977) | 50977                                                                                              | 50985 | 50996 | 51007 | 51018 | 51029 | 51040 | 51051 | 51072 |       |
|                                          | (50977) | TTCAGTGCAATTTAGTGCATTGTTTCAGTTTAGAACGTTGCTTTGTCAGATTTTGAACCCTTGACTGAGCTTGTTCTAACGCCTTTTCAGCTTCTAGC |       |       |       |       |       |       |       |       |       |
|                                          |         | -----                                                                                              |       |       |       |       |       |       |       |       |       |

## SARS-CoV-2 &amp; T4.apr

|                                          |         |                                                                                                   |       |       |       |       |       |       |       |             |       |
|------------------------------------------|---------|---------------------------------------------------------------------------------------------------|-------|-------|-------|-------|-------|-------|-------|-------------|-------|
|                                          |         |                                                                                                   |       |       |       |       |       |       |       | Section 533 |       |
| T4 NC 000866.4<br>SARS-CoV-2 NC_045512.2 | (51073) | 51073                                                                                             | 51084 | 51095 | 51106 | 51117 | 51128 | 51139 | 51150 | 51168       |       |
|                                          | (51073) | ACTTCATTGGTCGCTTTAACTAATTCAGCATCTACTGCCTTAAGAGACTTCTCAATCGCATCCGCGTGCCATTTTTCAACAGGTTTAAGACTTGGG  |       |       |       |       |       |       |       |             |       |
|                                          | (1)     | -----                                                                                             |       |       |       |       |       |       |       |             |       |
|                                          |         |                                                                                                   |       |       |       |       |       |       |       | Section 534 |       |
| T4 NC 000866.4<br>SARS-CoV-2 NC_045512.2 | (51169) | 51169                                                                                             | 51183 | 51194 | 51205 | 51216 | 51227 | 51238 | 51249 | 51264       |       |
|                                          | (51169) | TTTTCAACAGGAAGAAAATTCACCTTTATTGAATTTCCATGCATCTTTATTACCTGAGCTATACATCCAAAATTTAGGATCGTTTGATAAGTAATTA |       |       |       |       |       |       |       |             |       |
|                                          | (1)     | -----                                                                                             |       |       |       |       |       |       |       |             |       |
|                                          |         |                                                                                                   |       |       |       |       |       |       |       | Section 535 |       |
| T4 NC 000866.4<br>SARS-CoV-2 NC_045512.2 | (51265) | 51265                                                                                             | 51271 | 51282 | 51293 | 51304 | 51315 | 51326 | 51337 | 51348       | 51360 |
|                                          | (51265) | GATAAATTTAAGTTATCTTGCACTTCTTGCTTTTTCTCTTGTTGAGTTCGTCCTTTCTCAAAAATTCATATTTAAATGAAACGATCATATCAAGT   |       |       |       |       |       |       |       |             |       |
|                                          | (1)     | -----                                                                                             |       |       |       |       |       |       |       |             |       |
|                                          |         |                                                                                                   |       |       |       |       |       |       |       | Section 536 |       |
| T4 NC 000866.4<br>SARS-CoV-2 NC_045512.2 | (51361) | 51361                                                                                             | 51370 | 51381 | 51392 | 51403 | 51414 | 51425 | 51436 | 51456       |       |
|                                          | (51361) | TCATATGATGTTGTATCTAACTTAAATCGTTCAAAACGAGGTAAATCTTAGATTGAACAGCAGCAACAACATCCATATACTTAAATGCTTCTGTCT  |       |       |       |       |       |       |       |             |       |
|                                          | (1)     | -----                                                                                             |       |       |       |       |       |       |       |             |       |
|                                          |         |                                                                                                   |       |       |       |       |       |       |       | Section 537 |       |
| T4 NC 000866.4<br>SARS-CoV-2 NC_045512.2 | (51457) | 51457                                                                                             | 51469 | 51480 | 51491 | 51502 | 51513 | 51524 | 51535 | 51552       |       |
|                                          | (51457) | AACTGCGATTTAAGGCATTCGCAAATTGAAAGAGAATTTTTGTATTAGGTTTAAAGCTAATTCGTGCAGTTCTATTATTTTCTTTTAACGGTCTT   |       |       |       |       |       |       |       |             |       |
|                                          | (1)     | -----                                                                                             |       |       |       |       |       |       |       |             |       |
|                                          |         |                                                                                                   |       |       |       |       |       |       |       | Section 538 |       |
| T4 NC 000866.4<br>SARS-CoV-2 NC_045512.2 | (51553) | 51553                                                                                             | 51568 | 51579 | 51590 | 51601 | 51612 | 51623 | 51634 | 51648       |       |
|                                          | (51553) | ACTTCCATCTGAAGAGTATAACCATCAAATTTAGATTCTTTAAGTTAATGTCAGAGCCTTTTAATCGACTAGCAGTAGACAAAATTTGCTTTAAT   |       |       |       |       |       |       |       |             |       |
|                                          | (1)     | -----                                                                                             |       |       |       |       |       |       |       |             |       |
|                                          |         |                                                                                                   |       |       |       |       |       |       |       | Section 539 |       |
| T4 NC 000866.4<br>SARS-CoV-2 NC_045512.2 | (51649) | 51649                                                                                             | 51656 | 51667 | 51678 | 51689 | 51700 | 51711 | 51722 | 51733       | 51744 |
|                                          | (51649) | TGTCTACGGAACAGAGCAATAAATCTCCATTCAATACGATAATGATTTGGATTGAAAAATCCAGATGATAAATCGACCTTACTTTGACCAACGCCT  |       |       |       |       |       |       |       |             |       |
|                                          | (1)     | -----                                                                                             |       |       |       |       |       |       |       |             |       |

## SARS-CoV-2 &amp; T4.apr

|                                          |         |                                                                                                      |       |       |       |       |       |       |       |
|------------------------------------------|---------|------------------------------------------------------------------------------------------------------|-------|-------|-------|-------|-------|-------|-------|
|                                          |         | Section 540                                                                                          |       |       |       |       |       |       |       |
| T4 NC 000866.4<br>SARS-CoV-2 NC_045512.2 | (51745) | 51745                                                                                                | 51755 | 51766 | 51777 | 51788 | 51799 | 51810 | 51821 |
|                                          | (51745) | TGAACAAATAGAGGATTTTATAATCAATAGTTTACAGAAATCGGTGAGCTGTTACAGAGCAGTCATTTGAGTAATATACCCTGCTTTACTAAAA       |       |       |       |       |       |       |       |
|                                          |         | Section 541                                                                                          |       |       |       |       |       |       |       |
| T4 NC 000866.4<br>SARS-CoV-2 NC_045512.2 | (51841) | 51841                                                                                                | 51854 | 51865 | 51876 | 51887 | 51898 | 51909 | 51920 |
|                                          | (51841) | TTACGCACCCATTCACTGCTATTCGTATACTTAAAGTGATGAATAACACGATTAACTTTATCAGGGTCTAAATTATTTTCACACAAAAATGTCATA     |       |       |       |       |       |       |       |
|                                          |         | Section 542                                                                                          |       |       |       |       |       |       |       |
| T4 NC 000866.4<br>SARS-CoV-2 NC_045512.2 | (51937) | 51937                                                                                                | 51942 | 51953 | 51964 | 51975 | 51986 | 51997 | 52008 |
|                                          | (51937) | ACATCACGAGTATAGCTGGCATTACGAACCATATCTTCAATTTGAGAACGAGTTTTTCATGGTGTTCTTAAGATTTAAGTAAATCAACAATTTTAA     |       |       |       |       |       |       |       |
|                                          |         | Section 543                                                                                          |       |       |       |       |       |       |       |
| T4 NC 000866.4<br>SARS-CoV-2 NC_045512.2 | (52033) | 52033                                                                                                | 52041 | 52052 | 52063 | 52074 | 52085 | 52096 | 52107 |
|                                          | (52033) | TTAACTTTTCACGCTCAGATTTAGCTTTACTACTCAATCCAGATAGTCTGAAAATTTTCATCATCATATTGTTGAATAGAAATATCAGCTCTTCAAT    |       |       |       |       |       |       |       |
|                                          |         | Section 544                                                                                          |       |       |       |       |       |       |       |
| T4 NC 000866.4<br>SARS-CoV-2 NC_045512.2 | (52129) | 52129                                                                                                | 52140 | 52151 | 52162 | 52173 | 52184 | 52195 | 52206 |
|                                          | (52129) | TTGCTTATTAAAAATAATCAATTTGTTTCAGAAATGTTTTTCGTTACTACGAACTGGTACAGGTTTTGTAGGCAATTTAGTTGAACTGGATTTCATTCGG |       |       |       |       |       |       |       |
|                                          |         | Section 545                                                                                          |       |       |       |       |       |       |       |
| T4 NC 000866.4<br>SARS-CoV-2 NC_045512.2 | (52225) | 52225                                                                                                | 52239 | 52250 | 52261 | 52272 | 52283 | 52294 | 52305 |
|                                          | (52225) | GCGATAAAATTAAAAATGCAATTTGAACCAATCGGGCATTAGCACCAGATGAATATTCTAACGTTCCAGCTTCTTTTAAACTTCAAAGCTAAACA      |       |       |       |       |       |       |       |
|                                          |         | Section 546                                                                                          |       |       |       |       |       |       |       |
| T4 NC 000866.4<br>SARS-CoV-2 NC_045512.2 | (52321) | 52321                                                                                                | 52327 | 52338 | 52349 | 52360 | 52371 | 52382 | 52393 |
|                                          | (52321) | GAGATGATGCCCCATATTAACATAATCAGTAGAGCGAGCTCTGATGTAATAATCATCTCCACGAGTGCTAAATTTAAAGCATTTAAGGTCTTCTGT     |       |       |       |       |       |       |       |

## SARS-CoV-2 &amp; T4.apr

|                                          |         |                                                                                                    |       |       |       |       |       |       |       |
|------------------------------------------|---------|----------------------------------------------------------------------------------------------------|-------|-------|-------|-------|-------|-------|-------|
|                                          |         | Section 547                                                                                        |       |       |       |       |       |       |       |
| T4 NC 000866.4<br>SARS-CoV-2 NC_045512.2 | (52417) | 52417                                                                                              | 52426 | 52437 | 52448 | 52459 | 52470 | 52481 | 52492 |
|                                          | (52417) | ATTATTAGTTTTAAAAATCATTTGTTTATCTAGACCTTTAGCCAATCGAGCACCTAATGCTAATAATCGTCGTTGATTTTCCCACAAATCTGCGAT   |       |       |       |       |       |       |       |
|                                          |         | -----                                                                                              |       |       |       |       |       |       |       |
|                                          |         | Section 548                                                                                        |       |       |       |       |       |       |       |
| T4 NC 000866.4<br>SARS-CoV-2 NC_045512.2 | (52513) | 52513                                                                                              | 52525 | 52536 | 52547 | 52558 | 52569 | 52580 | 52591 |
|                                          | (52513) | CATTTGGTCAAATGATAATTTTCGGCATTAGCCGACCATAAAGGTCATATCCTTTATTATAATTGCGAAGGATTTCACTCGCATTAAATACGAGACAA |       |       |       |       |       |       |       |
|                                          |         | -----                                                                                              |       |       |       |       |       |       |       |
|                                          |         | Section 549                                                                                        |       |       |       |       |       |       |       |
| T4 NC 000866.4<br>SARS-CoV-2 NC_045512.2 | (52609) | 52609                                                                                              | 52624 | 52635 | 52646 | 52657 | 52668 | 52679 | 52690 |
|                                          | (52609) | CGCTCCAATTTTATTAAAGGGCTTTCATAATACGATTAGATAAACTCATTCCAGACCCGTTTGTTTCGCTGTAAATGTTTTTCTAATCCAAATCCAAT |       |       |       |       |       |       |       |
|                                          |         | -----                                                                                              |       |       |       |       |       |       |       |
|                                          |         | Section 550                                                                                        |       |       |       |       |       |       |       |
| T4 NC 000866.4<br>SARS-CoV-2 NC_045512.2 | (52705) | 52705                                                                                              | 52712 | 52723 | 52734 | 52745 | 52756 | 52767 | 52778 |
|                                          | (52705) | ATCAACTTTAAATTTATCTAAAATTTTCAGCATGAACATCTCTGTCAATAACATTCAAATCCAAAGTTGGGTAAATCTATGAAAAAATTTATCTGG   |       |       |       |       |       |       |       |
|                                          |         | -----                                                                                              |       |       |       |       |       |       |       |
|                                          |         | Section 551                                                                                        |       |       |       |       |       |       |       |
| T4 NC 000866.4<br>SARS-CoV-2 NC_045512.2 | (52801) | 52801                                                                                              | 52811 | 52822 | 52833 | 52844 | 52855 | 52866 | 52877 |
|                                          | (52801) | CTCTCCACGACGTAAAAACAGTCCATTCATTCATCATTTTTTTTATTAATAAGATTTAATTACTGCGTTGACATTATTAATTACTACTGACATATT   |       |       |       |       |       |       |       |
|                                          |         | -----                                                                                              |       |       |       |       |       |       |       |
|                                          |         | Section 552                                                                                        |       |       |       |       |       |       |       |
| T4 NC 000866.4<br>SARS-CoV-2 NC_045512.2 | (52897) | 52897                                                                                              | 52910 | 52921 | 52932 | 52943 | 52954 | 52965 | 52976 |
|                                          | (52897) | TTCCTCACTCAATTTTACCAATTACGCGGAATAAGATTGAACAGACTATATAAGTACCACATATAGATTGAACTAATGCCATTCCAAAGAACCAAA   |       |       |       |       |       |       |       |
|                                          |         | -----                                                                                              |       |       |       |       |       |       |       |
|                                          |         | Section 553                                                                                        |       |       |       |       |       |       |       |
| T4 NC 000866.4<br>SARS-CoV-2 NC_045512.2 | (52993) | 52993                                                                                              | 52998 | 53009 | 53020 | 53031 | 53042 | 53053 | 53064 |
|                                          | (52993) | CAATATTATCAAACCATGTCTGTTTTACGTCGAAAGGACGTAACTTACAGTAATATTATCACCTTTTTTCTATTGAAGAATACGTCTCTGGGGAAA   |       |       |       |       |       |       |       |
|                                          |         | -----                                                                                              |       |       |       |       |       |       |       |

## SARS-CoV-2 &amp; T4.apr

|                                          |         |                                                                                                  |       |       |       |       |       |       |       |       |       |
|------------------------------------------|---------|--------------------------------------------------------------------------------------------------|-------|-------|-------|-------|-------|-------|-------|-------|-------|
|                                          |         | Section 554                                                                                      |       |       |       |       |       |       |       |       |       |
| T4 NC 000866.4<br>SARS-CoV-2 NC_045512.2 | (53089) | 53089                                                                                            | 53097 | 53108 | 53119 | 53130 | 53141 | 53152 | 53163 | 53184 |       |
|                                          | (53089) | TATATTCACTAAATCTATAACCGTCTTTGAGTTCATATACAGCAATAAACGATAAACTAGACCCCTTTCCTTGAGTTCCTGTAAGGGTATTAACTA |       |       |       |       |       |       |       |       |       |
|                                          |         | Section 555                                                                                      |       |       |       |       |       |       |       |       |       |
| T4 NC 000866.4<br>SARS-CoV-2 NC_045512.2 | (53185) | 53185                                                                                            | 53196 | 53207 | 53218 | 53229 | 53240 | 53251 | 53262 | 53280 |       |
|                                          | (53185) | CAGTAACATCATAATCTTTATAATGCATATAATCATTAATTGCGTAATAACCATATGCAATTACTATACATAAACAACATATCAATAAATTCAATC |       |       |       |       |       |       |       |       |       |
|                                          |         | Section 556                                                                                      |       |       |       |       |       |       |       |       |       |
| T4 NC 000866.4<br>SARS-CoV-2 NC_045512.2 | (53281) | 53281                                                                                            | 53295 | 53306 | 53317 | 53328 | 53339 | 53350 | 53361 | 53376 |       |
|                                          | (53281) | TTTTAATTATCAACTGTTTCATAATAATCTCAATTAAAAGGGCTTAGAACCATTATACCATCCTTGGTATAAAGCGGTTATGCGAGTACCGTATTT |       |       |       |       |       |       |       |       |       |
|                                          |         | Section 557                                                                                      |       |       |       |       |       |       |       |       |       |
| T4 NC 000866.4<br>SARS-CoV-2 NC_045512.2 | (53377) | 53377                                                                                            | 53383 | 53394 | 53405 | 53416 | 53427 | 53438 | 53449 | 53460 | 53472 |
|                                          | (53377) | AACCGTTCTTCAAACCTCCGAAGAGTGTTCTGGCGTTCAGCTCTTTGCTTTTTGTAAGTTTCAATACGCTCTGAAATGAGAGTGATCGTTCATTT  |       |       |       |       |       |       |       |       |       |
|                                          |         | Section 558                                                                                      |       |       |       |       |       |       |       |       |       |
| T4 NC 000866.4<br>SARS-CoV-2 NC_045512.2 | (53473) | 53473                                                                                            | 53482 | 53493 | 53504 | 53515 | 53526 | 53537 | 53548 | 53568 |       |
|                                          | (53473) | ACTGATTCTTTCATAAAATCAGGAATTTCTCGAGAAGCTTTAATCTCGTCAAATTTATCAATAACAGCTTGCTCTTCAGCAATTAAGTTATCATAC |       |       |       |       |       |       |       |       |       |
|                                          |         | Section 559                                                                                      |       |       |       |       |       |       |       |       |       |
| T4 NC 000866.4<br>SARS-CoV-2 NC_045512.2 | (53569) | 53569                                                                                            | 53581 | 53592 | 53603 | 53614 | 53625 | 53636 | 53647 | 53664 |       |
|                                          | (53569) | ATCAAAATATCTTTCTTGATGAACTCAATATCTTCTTGAGTTACACGAGATAATTTAGATGCTTTATCCTTTTTGTACTGTTGTTAGTATCACGA  |       |       |       |       |       |       |       |       |       |
|                                          |         | Section 560                                                                                      |       |       |       |       |       |       |       |       |       |
| T4 NC 000866.4<br>SARS-CoV-2 NC_045512.2 | (53665) | 53665                                                                                            | 53680 | 53691 | 53702 | 53713 | 53724 | 53735 | 53746 | 53760 |       |
|                                          | (53665) | GACCAGTGTAATGTACGATTTTTATTTCGTATTCTTGTAATTTCTACAATACCAATCTCATCGATAATAACGATCCAATTCCAACGGGATTTGTAA |       |       |       |       |       |       |       |       |       |



## SARS-CoV-2 &amp; T4.apr

|                                          |                |                                                                                                            |       |       |       |       |       |       |       |       |       |
|------------------------------------------|----------------|------------------------------------------------------------------------------------------------------------|-------|-------|-------|-------|-------|-------|-------|-------|-------|
| Section 561                              |                |                                                                                                            |       |       |       |       |       |       |       |       |       |
| T4 NC 000866.4<br>SARS-CoV-2 NC_045512.2 | (53761)        | 53761                                                                                                      | 53768 | 53779 | 53790 | 53801 | 53812 | 53823 | 53834 | 53845 | 53856 |
|                                          | (53761)<br>(1) | ATTTGTCTCCATTAAACAGTGATTTACCTCCGATTGAGATGTCATTAAAGAACTTGCTTTGTGCTTCTGATTTAAATTTACCATCGTTGTAATTT<br>-----   |       |       |       |       |       |       |       |       |       |
| Section 562                              |                |                                                                                                            |       |       |       |       |       |       |       |       |       |
| T4 NC 000866.4<br>SARS-CoV-2 NC_045512.2 | (53857)        | 53857                                                                                                      | 53867 | 53878 | 53889 | 53900 | 53911 | 53922 | 53933 | 53952 |       |
|                                          | (53857)<br>(1) | ACCAGGTTGAAAATATCTTTAGCGTTCATTTTGTGTTCCCTCCGTAGTTGATAGTTGTATAGTACCACAGAGGAACGGTCTTGTAACAACATAAAAG<br>----- |       |       |       |       |       |       |       |       |       |
| Section 563                              |                |                                                                                                            |       |       |       |       |       |       |       |       |       |
| T4 NC 000866.4<br>SARS-CoV-2 NC_045512.2 | (53953)        | 53953                                                                                                      | 53966 | 53977 | 53988 | 53999 | 54010 | 54021 | 54032 | 54048 |       |
|                                          | (53953)<br>(1) | AAACTTCTTTCACAATTTTTTCCACTGAACCAAGCGCTCACTGCTTTCTTAGTTTCAGGAGCAGTGTTATCCATAAACCATTCAAAGGCAGCCTTT<br>-----  |       |       |       |       |       |       |       |       |       |
| Section 564                              |                |                                                                                                            |       |       |       |       |       |       |       |       |       |
| T4 NC 000866.4<br>SARS-CoV-2 NC_045512.2 | (54049)        | 54049                                                                                                      | 54054 | 54065 | 54076 | 54087 | 54098 | 54109 | 54120 | 54131 | 54144 |
|                                          | (54049)<br>(1) | TTATGATTCTGGAGGGCTTCTCGGGCTTTAATCTGCTCACGGTCTATTAACACTAACATATGAGCCTTTCTTGTCACCAGGGGCTTCTTATGATTT<br>-----  |       |       |       |       |       |       |       |       |       |
| Section 565                              |                |                                                                                                            |       |       |       |       |       |       |       |       |       |
| T4 NC 000866.4<br>SARS-CoV-2 NC_045512.2 | (54145)        | 54145                                                                                                      | 54153 | 54164 | 54175 | 54186 | 54197 | 54208 | 54219 | 54240 |       |
|                                          | (54145)<br>(1) | TTTGAATACTCCCAATCATTTGTCCATCGCATCGTTGTTGCGAATTGAAATACAGCTTCTTTAATCTTAGTTTCGTAAATTTACGAGCCTTTGAG<br>-----   |       |       |       |       |       |       |       |       |       |
| Section 566                              |                |                                                                                                            |       |       |       |       |       |       |       |       |       |
| T4 NC 000866.4<br>SARS-CoV-2 NC_045512.2 | (54241)        | 54241                                                                                                      | 54252 | 54263 | 54274 | 54285 | 54296 | 54307 | 54318 | 54336 |       |
|                                          | (54241)<br>(1) | TATAACATCATTACCTCCATTTACCAGTTTAATTCTAGTCATCTTTTTGATGGCAGTCCATATAATCTATTTCTGAACTGCCTTTTTGTCTTAGAA<br>-----  |       |       |       |       |       |       |       |       |       |
| Section 567                              |                |                                                                                                            |       |       |       |       |       |       |       |       |       |
| T4 NC 000866.4<br>SARS-CoV-2 NC_045512.2 | (54337)        | 54337                                                                                                      | 54351 | 54362 | 54373 | 54384 | 54395 | 54406 | 54417 | 54432 |       |
|                                          | (54337)<br>(1) | GGCCTCTTATGAATTTATTTTCAGAAGAGTAACCCGTAGCGATTTCTTCCCAACCGTTTTTGTGCGTCATAATAAAGTCAGCAAGATAAAGTGCAGT<br>----- |       |       |       |       |       |       |       |       |       |

## SARS-CoV-2 &amp; T4.apr

|                                          |                |                                                                                                             |       |       |       |       |       |       |       |       |       |
|------------------------------------------|----------------|-------------------------------------------------------------------------------------------------------------|-------|-------|-------|-------|-------|-------|-------|-------|-------|
|                                          |                | Section 568                                                                                                 |       |       |       |       |       |       |       |       |       |
| T4 NC 000866.4<br>SARS-CoV-2 NC_045512.2 | (54433)        | 54433                                                                                                       | 54439 | 54450 | 54461 | 54472 | 54483 | 54494 | 54505 | 54516 | 54528 |
|                                          | (54433)<br>(1) | ACGCAGTGAAACATTACGTAAACGGTTAACATTGACTTTTCATCCATGATAATGCTTTATAAGTTTCTTCATCAGAAAGACCACGCTTTTGCATCAT<br>-----  |       |       |       |       |       |       |       |       |       |
|                                          |                | Section 569                                                                                                 |       |       |       |       |       |       |       |       |       |
| T4 NC 000866.4<br>SARS-CoV-2 NC_045512.2 | (54529)        | 54529                                                                                                       | 54538 | 54549 | 54560 | 54571 | 54582 | 54593 | 54604 |       | 54624 |
|                                          | (54529)<br>(1) | GTCGGTTGAAAGAATAACATCTTCAACCCTGACCATAATTTCTTCATTAGTGTGAACACCCAAATCCAAATAAACTGAGCGGGACACTAATGCTTG<br>-----   |       |       |       |       |       |       |       |       |       |
|                                          |                | Section 570                                                                                                 |       |       |       |       |       |       |       |       |       |
| T4 NC 000866.4<br>SARS-CoV-2 NC_045512.2 | (54625)        | 54625                                                                                                       | 54637 | 54648 | 54659 | 54670 | 54681 | 54692 | 54703 |       | 54720 |
|                                          | (54625)<br>(1) | TAAATGTGGAGCAAGTTTAGTACCACGGTCTAATTCGCGGTCAATGTCAACGTTTGTGATAAAAACAATTGTTTCCTTTAAATTCGAGCTCAGCTC<br>-----   |       |       |       |       |       |       |       |       |       |
|                                          |                | Section 571                                                                                                 |       |       |       |       |       |       |       |       |       |
| T4 NC 000866.4<br>SARS-CoV-2 NC_045512.2 | (54721)        | 54721                                                                                                       | 54736 | 54747 | 54758 | 54769 | 54780 | 54791 | 54802 |       | 54816 |
|                                          | (54721)<br>(1) | AATGCCTTTTTCTTCTAAGTAAGAAGATGCAGTGCTCCAGCAGACTTTACGGGTCTCTCCAGTGTCAGAGCAGCTTTTCAGAAGATTAAGAATGTC<br>-----   |       |       |       |       |       |       |       |       |       |
|                                          |                | Section 572                                                                                                 |       |       |       |       |       |       |       |       |       |
| T4 NC 000866.4<br>SARS-CoV-2 NC_045512.2 | (54817)        | 54817                                                                                                       | 54824 | 54835 | 54846 | 54857 | 54868 | 54879 | 54890 | 54901 | 54912 |
|                                          | (54817)<br>(1) | CATATCAGAGAAAACATCCACATCATCAATCAAAAGGACAGAAATTCTCTTCACGATTATTCCAAAGCTGTTTCATAAAGACCGATACCAGAGATTTT<br>----- |       |       |       |       |       |       |       |       |       |
|                                          |                | Section 573                                                                                                 |       |       |       |       |       |       |       |       |       |
| T4 NC 000866.4<br>SARS-CoV-2 NC_045512.2 | (54913)        | 54913                                                                                                       | 54923 | 54934 | 54945 | 54956 | 54967 | 54978 | 54989 |       | 55008 |
|                                          | (54913)<br>(1) | ACCGTTAATGCTTTTATACTCAATGTATCCAATATCATTTGCTTTATTCAAAGCTTTATCTAAAGAATATGTTTTACCAATACCCGCCGCACCAGA<br>-----   |       |       |       |       |       |       |       |       |       |
|                                          |                | Section 574                                                                                                 |       |       |       |       |       |       |       |       |       |
| T4 NC 000866.4<br>SARS-CoV-2 NC_045512.2 | (55009)        | 55009                                                                                                       | 55022 | 55033 | 55044 | 55055 | 55066 | 55077 | 55088 |       | 55104 |
|                                          | (55009)<br>(1) | GATAATTAATGAACGAATATTTCCGTTAATAATACCATTTCGTATCATTTCCATAACATTAAATCTTTTATTAATGCGGGTTTTTCATATCTTCATA<br>-----  |       |       |       |       |       |       |       |       |       |

## SARS-CoV-2 &amp; T4.apr

|                                          |                |                                                                                                  |       |       |       |       |       |       |       |       |       |
|------------------------------------------|----------------|--------------------------------------------------------------------------------------------------|-------|-------|-------|-------|-------|-------|-------|-------|-------|
|                                          |                | Section 575                                                                                      |       |       |       |       |       |       |       |       |       |
| T4 NC 000866.4<br>SARS-CoV-2 NC_045512.2 | (55105)        | 55105                                                                                            | 55110 | 55121 | 55132 | 55143 | 55154 | 55165 | 55176 | 55187 | 55200 |
|                                          | (55105)<br>(1) | TGATTCTTTAACTTCTTCAACTTTTACACCATCATATGAAATGTCTGATTTGTAAACCCAAACACCGCGACGTTTACCGTCAATTTCAACAAAAAC |       |       |       |       |       |       |       |       |       |
|                                          |                | Section 576                                                                                      |       |       |       |       |       |       |       |       |       |
| T4 NC 000866.4<br>SARS-CoV-2 NC_045512.2 | (55201)        | 55201                                                                                            | 55209 | 55220 | 55231 | 55242 | 55253 | 55264 | 55275 |       | 55296 |
|                                          | (55201)<br>(1) | TTTACCATCTCCTTGTGCATCTACCGGAGCATTATCAGGGAACCATTACCTAAGAGCTCAAAAGTTCCAGAGATTTCTTTACCGAAGTACATACC  |       |       |       |       |       |       |       |       |       |
|                                          |                | Section 577                                                                                      |       |       |       |       |       |       |       |       |       |
| T4 NC 000866.4<br>SARS-CoV-2 NC_045512.2 | (55297)        | 55297                                                                                            | 55308 | 55319 | 55330 | 55341 | 55352 | 55363 | 55374 |       | 55392 |
|                                          | (55297)<br>(1) | CTTATTGATAGTTACAGTTTTTCATTTTATTCTCCAAATCCGTATCAGTTGATAGTTGTATAGTACCATAAAGCTTTATGCTTGTAACCGTTTTGT |       |       |       |       |       |       |       |       |       |
|                                          |                | Section 578                                                                                      |       |       |       |       |       |       |       |       |       |
| T4 NC 000866.4<br>SARS-CoV-2 NC_045512.2 | (55393)        | 55393                                                                                            | 55407 | 55418 | 55429 | 55440 | 55451 | 55462 | 55473 |       | 55488 |
|                                          | (55393)<br>(1) | GAAAAAATTTTGAAATAAAAAAGGGAGCCCGAAGGCTCCCTATCATTATAATAACTTCGATGGTTTTCAAGATAAACCTCTCAAGGAAGTCATC   |       |       |       |       |       |       |       |       |       |
|                                          |                | Section 579                                                                                      |       |       |       |       |       |       |       |       |       |
| T4 NC 000866.4<br>SARS-CoV-2 NC_045512.2 | (55489)        | 55489                                                                                            | 55495 | 55506 | 55517 | 55528 | 55539 | 55550 | 55561 | 55572 | 55584 |
|                                          | (55489)<br>(1) | CCAGAAACTCATGTCTACTTTTTGCTGCATACCGTTCTTAGAAGCTTCAGTAGATGCTGCTTCTACTTGATCGACCACATCTTCCAAAACTCTTG  |       |       |       |       |       |       |       |       |       |
|                                          |                | Section 580                                                                                      |       |       |       |       |       |       |       |       |       |
| T4 NC 000866.4<br>SARS-CoV-2 NC_045512.2 | (55585)        | 55585                                                                                            | 55594 | 55605 | 55616 | 55627 | 55638 | 55649 | 55660 |       | 55680 |
|                                          | (55585)<br>(1) | AACGGTTTTAAATGGATGCTTACCCAACCTCACGTCGAGAATAAATGGAGCATCTTGAGTGGATAAACCAAGTCACCAGTTTTGTAAATTTCCAA  |       |       |       |       |       |       |       |       |       |
|                                          |                | Section 581                                                                                      |       |       |       |       |       |       |       |       |       |
| T4 NC 000866.4<br>SARS-CoV-2 NC_045512.2 | (55681)        | 55681                                                                                            | 55693 | 55704 | 55715 | 55726 | 55737 | 55748 | 55759 |       | 55776 |
|                                          | (55681)<br>(1) | TAGTTGAAGTCCACCACGACAAGCATGGCTCAGAGCTTTCCAGTCAATGCCTTCATTGGCTTCGGCCTTACGAGCACGTTCCCGTATTTCAGCATC |       |       |       |       |       |       |       |       |       |

## SARS-CoV-2 &amp; T4.apr

|                                          |         |                                                                                                   |       |       |       |       |       |       |       |       |       |
|------------------------------------------|---------|---------------------------------------------------------------------------------------------------|-------|-------|-------|-------|-------|-------|-------|-------|-------|
|                                          |         | Section 582                                                                                       |       |       |       |       |       |       |       |       |       |
| T4 NC 000866.4<br>SARS-CoV-2 NC_045512.2 | (55777) | 55777                                                                                             | 55792 | 55803 | 55814 | 55825 | 55836 | 55847 | 55858 | 55872 |       |
|                                          | (55777) | TAATTTGTTTCAGTGACTGCTTAAGCTCAATAAGAGAAAGCGTTGTCTGATATTTACGACCCAACACTGTGTAAAACGTTTGTGGGCCTGTTTTCTC |       |       |       |       |       |       |       |       |       |
|                                          |         | -----                                                                                             |       |       |       |       |       |       |       |       |       |
|                                          |         | Section 583                                                                                       |       |       |       |       |       |       |       |       |       |
| T4 NC 000866.4<br>SARS-CoV-2 NC_045512.2 | (55873) | 55873                                                                                             | 55880 | 55891 | 55902 | 55913 | 55924 | 55935 | 55946 | 55957 | 55968 |
|                                          | (55873) | ATGATTATGGAACACCCATTACAGAAATTCGTTTTCTGGAAGACGATGCTTAATATCTTCAACTTTAGTACGACGCTGCTTAATGGAACCATCTTC  |       |       |       |       |       |       |       |       |       |
|                                          |         | -----                                                                                             |       |       |       |       |       |       |       |       |       |
|                                          |         | Section 584                                                                                       |       |       |       |       |       |       |       |       |       |
| T4 NC 000866.4<br>SARS-CoV-2 NC_045512.2 | (55969) | 55969                                                                                             | 55979 | 55990 | 56001 | 56012 | 56023 | 56034 | 56045 | 56064 |       |
|                                          | (55969) | TTGGTAATCAACCCATTGCTCAGGGATTTGATTAACTACTTTCAATACATCGCGTAATGCAGCCAAACGAGAACCCTTGACGCCGTATTTAGAAGC  |       |       |       |       |       |       |       |       |       |
|                                          |         | -----                                                                                             |       |       |       |       |       |       |       |       |       |
|                                          |         | Section 585                                                                                       |       |       |       |       |       |       |       |       |       |
| T4 NC 000866.4<br>SARS-CoV-2 NC_045512.2 | (56065) | 56065                                                                                             | 56078 | 56089 | 56100 | 56111 | 56122 | 56133 | 56144 | 56160 |       |
|                                          | (56065) | TTGCTTGCGGACATATCCTAAATATGATTTTCATGTTAGTCGTATAAAAACGAGAACGGTTGTCTTGAATAAACTTCCAMACATCAGGCAAATCGGA |       |       |       |       |       |       |       |       |       |
|                                          |         | -----                                                                                             |       |       |       |       |       |       |       |       |       |
|                                          |         | Section 586                                                                                       |       |       |       |       |       |       |       |       |       |
| T4 NC 000866.4<br>SARS-CoV-2 NC_045512.2 | (56161) | 56161                                                                                             | 56166 | 56177 | 56188 | 56199 | 56210 | 56221 | 56232 | 56243 | 56256 |
|                                          | (56161) | TTTAACCACTAGTTCAGGTGGAGTGTGAAGCATATCCAATGCTACAGGTTCCACCATCTGCTGCTAATTTAAAGAAATACTTAAGACTATACAATTC |       |       |       |       |       |       |       |       |       |
|                                          |         | -----                                                                                             |       |       |       |       |       |       |       |       |       |
|                                          |         | Section 587                                                                                       |       |       |       |       |       |       |       |       |       |
| T4 NC 000866.4<br>SARS-CoV-2 NC_045512.2 | (56257) | 56257                                                                                             | 56265 | 56276 | 56287 | 56298 | 56309 | 56320 | 56331 | 56352 |       |
|                                          | (56257) | GTGGTCAATATTATCTTTAGTGTTTTAGATGATGTGTTGTTGGTATTTTTACTCATGTGCTCTTTGACGTTTCCAATAAGAATATCGCGAGCAGG   |       |       |       |       |       |       |       |       |       |
|                                          |         | -----                                                                                             |       |       |       |       |       |       |       |       |       |
|                                          |         | Section 588                                                                                       |       |       |       |       |       |       |       |       |       |
| T4 NC 000866.4<br>SARS-CoV-2 NC_045512.2 | (56353) | 56353                                                                                             | 56364 | 56375 | 56386 | 56397 | 56408 | 56419 | 56430 | 56448 |       |
|                                          | (56353) | AGGAACAAAGATTTCTTTAAATCTACATCAGATTCTGGAGTAGAAGTTCCATAAAGATGACTACCAAATAAGACTTAACTACAGTTTTTCATTAT   |       |       |       |       |       |       |       |       |       |
|                                          |         | -----                                                                                             |       |       |       |       |       |       |       |       |       |

## SARS-CoV-2 &amp; T4.apr

|                                          |                |                                                                                                   |       |       |       |       |       |       |       |       |       |
|------------------------------------------|----------------|---------------------------------------------------------------------------------------------------|-------|-------|-------|-------|-------|-------|-------|-------|-------|
|                                          |                | Section 589                                                                                       |       |       |       |       |       |       |       |       |       |
| T4 NC 000866.4<br>SARS-CoV-2 NC_045512.2 | (56449)        | 56449                                                                                             | 56463 | 56474 | 56485 | 56496 | 56507 | 56518 | 56529 | 56544 |       |
|                                          | (56449)<br>(1) | TAGACCTTTCATAATCTTCATTAAATTGTACAATCAATCGATGATAATTAGATTTTGGATATCCTAATTTACTTATATAAGTTCCGAATGACCCAC  |       |       |       |       |       |       |       |       |       |
|                                          |                | Section 590                                                                                       |       |       |       |       |       |       |       |       |       |
| T4 NC 000866.4<br>SARS-CoV-2 NC_045512.2 | (56545)        | 56545                                                                                             | 56551 | 56562 | 56573 | 56584 | 56595 | 56606 | 56617 | 56628 | 56640 |
|                                          | (56545)<br>(1) | GTTTAGGCTCTATTTAATTTAATCCATAACTTATAAAGTAAGTCATAGTCTTGCCAATGTTTACCAGTTCTTTGTCTAATTTTAGATGAATTTGATT |       |       |       |       |       |       |       |       |       |
|                                          |                | Section 591                                                                                       |       |       |       |       |       |       |       |       |       |
| T4 NC 000866.4<br>SARS-CoV-2 NC_045512.2 | (56641)        | 56641                                                                                             | 56650 | 56661 | 56672 | 56683 | 56694 | 56705 | 56716 | 56736 |       |
|                                          | (56641)<br>(1) | GTTTCTTTTTTAGCTTCAAAATTATTCAAAGATTTTTTGACTGCAGCAGAGTGTTTTCTTTAACTCCC GGTCGTTTAAAAGCAGCTTTCACCCCTT |       |       |       |       |       |       |       |       |       |
|                                          |                | Section 592                                                                                       |       |       |       |       |       |       |       |       |       |
| T4 NC 000866.4<br>SARS-CoV-2 NC_045512.2 | (56737)        | 56737                                                                                             | 56749 | 56760 | 56771 | 56782 | 56793 | 56804 | 56815 | 56832 |       |
|                                          | (56737)<br>(1) | TAGATATTTTTTCTTTAACTTCCGGTTTGTTTTGTGCTTCTAACTGGGATTCTGAAATTTTAGCCCTTATTTTCAGGAAGACTTAATGTTATCGAAC |       |       |       |       |       |       |       |       |       |
|                                          |                | Section 593                                                                                       |       |       |       |       |       |       |       |       |       |
| T4 NC 000866.4<br>SARS-CoV-2 NC_045512.2 | (56833)        | 56833                                                                                             | 56848 | 56859 | 56870 | 56881 | 56892 | 56903 | 56914 | 56928 |       |
|                                          | (56833)<br>(1) | GTTTTTCTCTGTATTCATTAGACTTCCACATTTCTTTCATTGTATTAGAATGTATTTTGAAAATTTTCTCTAACTAACTGATATCCTCTTGAAG    |       |       |       |       |       |       |       |       |       |
|                                          |                | Section 594                                                                                       |       |       |       |       |       |       |       |       |       |
| T4 NC 000866.4<br>SARS-CoV-2 NC_045512.2 | (56929)        | 56929                                                                                             | 56936 | 56947 | 56958 | 56969 | 56980 | 56991 | 57002 | 57013 | 57024 |
|                                          | (56929)<br>(1) | TTAATTTGAGATTTCTTCCTAAAGAATCTTCTCCAAAATTATAAAATGACCACCATGCATAAATTAATCCAGGCGAATTGTAATGAATTTTAGCTA  |       |       |       |       |       |       |       |       |       |
|                                          |                | Section 595                                                                                       |       |       |       |       |       |       |       |       |       |
| T4 NC 000866.4<br>SARS-CoV-2 NC_045512.2 | (57025)        | 57025                                                                                             | 57035 | 57046 | 57057 | 57068 | 57079 | 57090 | 57101 | 57120 |       |
|                                          | (57025)<br>(1) | AAAGCCAATGGGCTATAAAATGCTCTCTAGCTGTTAATAAACTAGATTATCAGAATCATCATTACCACCAATACAAGATGGAATAATATGATGCT   |       |       |       |       |       |       |       |       |       |

## SARS-CoV-2 &amp; T4.apr

|                        |         |                                                                                                     |       |       |       |       |       |       |       |       |       |
|------------------------|---------|-----------------------------------------------------------------------------------------------------|-------|-------|-------|-------|-------|-------|-------|-------|-------|
|                        |         | Section 596                                                                                         |       |       |       |       |       |       |       |       |       |
|                        | (57121) | 57121                                                                                               | 57134 | 57145 | 57156 | 57167 | 57178 | 57189 | 57200 | 57216 |       |
| T4 NC 000866.4         | (57121) | TTTCCGTATAAAAAATTTAATTTAGATTTATCTAATTTTCTGAGTTTTCCTTTCTTAATTAAATTATTATATACTTTAGTATAATTCATTGGTTCTT   |       |       |       |       |       |       |       |       |       |
| SARS-CoV-2 NC_045512.2 | (1)     | -----                                                                                               |       |       |       |       |       |       |       |       |       |
|                        |         | Section 597                                                                                         |       |       |       |       |       |       |       |       |       |
|                        | (57217) | 57217                                                                                               | 57222 | 57233 | 57244 | 57255 | 57266 | 57277 | 57288 | 57299 | 57312 |
| T4 NC 000866.4         | (57217) | CGTCTCATTTAATTTTGCTTGCATTTATAACACATGTCTGTTCCACTTGAAATAAACATATTTCTCACTTTGAAATCATAGTTGGAATAACAGA      |       |       |       |       |       |       |       |       |       |
| SARS-CoV-2 NC_045512.2 | (1)     | -----                                                                                               |       |       |       |       |       |       |       |       |       |
|                        |         | Section 598                                                                                         |       |       |       |       |       |       |       |       |       |
|                        | (57313) | 57313                                                                                               | 57321 | 57332 | 57343 | 57354 | 57365 | 57376 | 57387 | 57408 |       |
| T4 NC 000866.4         | (57313) | ATCAAGATAAGTCTTTAGTGCAATAGCTTCCTCTTTCTTTAATGTAATGATATGTGATCGAAAATCATCAATTTGACGAATAGATACTACATCTCC    |       |       |       |       |       |       |       |       |       |
| SARS-CoV-2 NC_045512.2 | (1)     | -----                                                                                               |       |       |       |       |       |       |       |       |       |
|                        |         | Section 599                                                                                         |       |       |       |       |       |       |       |       |       |
|                        | (57409) | 57409                                                                                               | 57420 | 57431 | 57442 | 57453 | 57464 | 57475 | 57486 | 57504 |       |
| T4 NC 000866.4         | (57409) | CTCTTCATAGCATTTTGAAACATTTAAAATAGTTTCATCATTCTGATTACAGGAGTTAGTAATAATAGCATTACATTTTTTAAACCATTTTAAATT    |       |       |       |       |       |       |       |       |       |
| SARS-CoV-2 NC_045512.2 | (1)     | -----                                                                                               |       |       |       |       |       |       |       |       |       |
|                        |         | Section 600                                                                                         |       |       |       |       |       |       |       |       |       |
|                        | (57505) | 57505                                                                                               | 57519 | 57530 | 57541 | 57552 | 57563 | 57574 | 57585 | 57600 |       |
| T4 NC 000866.4         | (57505) | ATGTTTTCTTTTAGTAGAATCATAAAAAATATTTAATGTTAGTTATAAAAATTATCCCAATTATTAATTGATAAGCACATTGACTCGCTTTTAAATATT |       |       |       |       |       |       |       |       |       |
| SARS-CoV-2 NC_045512.2 | (1)     | -----                                                                                               |       |       |       |       |       |       |       |       |       |
|                        |         | Section 601                                                                                         |       |       |       |       |       |       |       |       |       |
|                        | (57601) | 57601                                                                                               | 57607 | 57618 | 57629 | 57640 | 57651 | 57662 | 57673 | 57684 | 57696 |
| T4 NC 000866.4         | (57601) | AAATCCTGGGCATGAAGAATAAAAAATGAATTTTATGCTCATCATTAATGCTTACAATTTTATCAGTGTAAGCATATTCAATTTGGGTAAACGAAC    |       |       |       |       |       |       |       |       |       |
| SARS-CoV-2 NC_045512.2 | (1)     | -----                                                                                               |       |       |       |       |       |       |       |       |       |
|                        |         | Section 602                                                                                         |       |       |       |       |       |       |       |       |       |
|                        | (57697) | 57697                                                                                               | 57706 | 57717 | 57728 | 57739 | 57750 | 57761 | 57772 | 57792 |       |
| T4 NC 000866.4         | (57697) | AATTTTCGCTAGGCGTAAAAATATAACATGTCATCTTCTTGCGTCAAACGATACATGTTATTTACTTTTTCTATAGCCAATTCACCAAAAAGTGGACT  |       |       |       |       |       |       |       |       |       |
| SARS-CoV-2 NC_045512.2 | (1)     | -----                                                                                               |       |       |       |       |       |       |       |       |       |

## SARS-CoV-2 &amp; T4.apr

|                                          |         |                                                                                                   |       |       |       |       |       |       |       |       |       |
|------------------------------------------|---------|---------------------------------------------------------------------------------------------------|-------|-------|-------|-------|-------|-------|-------|-------|-------|
|                                          |         | Section 603                                                                                       |       |       |       |       |       |       |       |       |       |
| T4 NC 000866.4<br>SARS-CoV-2 NC_045512.2 | (57793) | 57793                                                                                             | 57805 | 57816 | 57827 | 57838 | 57849 | 57860 | 57871 | 57888 |       |
|                                          | (57793) | AACTTCTAATACTAGTCGTTTCGCCTCGCTCATCATTACATACTCCTCTGAATCATATTAATAATGTTATTCACCAGATTATAAGTAAACATTGGG  |       |       |       |       |       |       |       |       |       |
|                                          | (1)     | -----                                                                                             |       |       |       |       |       |       |       |       |       |
|                                          |         | Section 604                                                                                       |       |       |       |       |       |       |       |       |       |
| T4 NC 000866.4<br>SARS-CoV-2 NC_045512.2 | (57889) | 57889                                                                                             | 57904 | 57915 | 57926 | 57937 | 57948 | 57959 | 57970 | 57984 |       |
|                                          | (57889) | TAATTATATTGAATCATCACATATATAACAAACAAAACCTTTCATTCTCTTCTCCTTGGCAGTTGACAAGATTACTATACCATAATCTTGTCAACTT |       |       |       |       |       |       |       |       |       |
|                                          | (1)     | -----                                                                                             |       |       |       |       |       |       |       |       |       |
|                                          |         | Section 605                                                                                       |       |       |       |       |       |       |       |       |       |
| T4 NC 000866.4<br>SARS-CoV-2 NC_045512.2 | (57985) | 57985                                                                                             | 57992 | 58003 | 58014 | 58025 | 58036 | 58047 | 58058 | 58069 | 58080 |
|                                          | (57985) | GTAAACCATTAAATGACGTTTTTCGATAAAATTTTGAAGCTTTGTATGAGCATCAACCATGATTTTCATTTCTTCCTTGGAAGCTGTGCCTCTTT   |       |       |       |       |       |       |       |       |       |
|                                          | (1)     | -----                                                                                             |       |       |       |       |       |       |       |       |       |
|                                          |         | Section 606                                                                                       |       |       |       |       |       |       |       |       |       |
| T4 NC 000866.4<br>SARS-CoV-2 NC_045512.2 | (58081) | 58081                                                                                             | 58091 | 58102 | 58113 | 58124 | 58135 | 58146 | 58157 | 58176 |       |
|                                          | (58081) | CCCAGAGAAGAACATTCATAGTCAGAACTGCATTAGCATATTCTTCAATTAGCTTCATTAAAAACATCTGTTTTTCAGTTTTTCATTATTCCACCTA |       |       |       |       |       |       |       |       |       |
|                                          | (1)     | -----                                                                                             |       |       |       |       |       |       |       |       |       |
|                                          |         | Section 607                                                                                       |       |       |       |       |       |       |       |       |       |
| T4 NC 000866.4<br>SARS-CoV-2 NC_045512.2 | (58177) | 58177                                                                                             | 58190 | 58201 | 58212 | 58223 | 58234 | 58245 | 58256 | 58272 |       |
|                                          | (58177) | ATCATTTCAAGATATTGAACTAACTTAGCTTTGGATTTATCCAAATCCCTTTTAGCTGCTTCTATACCGTCGTATGAATATCCTTCACAATGCTCA  |       |       |       |       |       |       |       |       |       |
|                                          | (1)     | -----                                                                                             |       |       |       |       |       |       |       |       |       |
|                                          |         | Section 608                                                                                       |       |       |       |       |       |       |       |       |       |
| T4 NC 000866.4<br>SARS-CoV-2 NC_045512.2 | (58273) | 58273                                                                                             | 58278 | 58289 | 58300 | 58311 | 58322 | 58333 | 58344 | 58355 | 58368 |
|                                          | (58273) | ACTGCTAATTGATATGAATCTATTTCAATATCATGCGCTAATTTAATGATTTTTTCAAACCTGTTGCGTGTTAGCATACTTAACTCTCGTATTAT   |       |       |       |       |       |       |       |       |       |
|                                          | (1)     | -----                                                                                             |       |       |       |       |       |       |       |       |       |
|                                          |         | Section 609                                                                                       |       |       |       |       |       |       |       |       |       |
| T4 NC 000866.4<br>SARS-CoV-2 NC_045512.2 | (58369) | 58369                                                                                             | 58377 | 58388 | 58399 | 58410 | 58421 | 58432 | 58443 | 58464 |       |
|                                          | (58369) | GATCGATAATTTTCATCAAGAAACATATCTAACGCTTCTACAGCATTATTAACCTTTAGCTTCAAATCTTCAATACCTGATAAGGCAAAGTTAATGC |       |       |       |       |       |       |       |       |       |
|                                          | (1)     | -----                                                                                             |       |       |       |       |       |       |       |       |       |

## SARS-CoV-2 &amp; T4.apr

|                                          |         |                                                                                                   |       |       |       |       |       |       |       |       |       |
|------------------------------------------|---------|---------------------------------------------------------------------------------------------------|-------|-------|-------|-------|-------|-------|-------|-------|-------|
|                                          |         | Section 610                                                                                       |       |       |       |       |       |       |       |       |       |
| T4 NC 000866.4<br>SARS-CoV-2 NC_045512.2 | (58465) | 58465                                                                                             | 58476 | 58487 | 58498 | 58509 | 58520 | 58531 | 58542 | 58560 |       |
|                                          | (58465) | GTTCTCATCTGCTTTACGAATTAAAGCTACCAATTCCTTAATTTTATCCGCTTGTTTCGATACTAATCATTATTCCACCACATATGAAAGAGAGAA  |       |       |       |       |       |       |       |       |       |
|                                          | (1)     | -----                                                                                             |       |       |       |       |       |       |       |       |       |
|                                          |         | Section 611                                                                                       |       |       |       |       |       |       |       |       |       |
| T4 NC 000866.4<br>SARS-CoV-2 NC_045512.2 | (58561) | 58561                                                                                             | 58575 | 58586 | 58597 | 58608 | 58619 | 58630 | 58641 | 58656 |       |
|                                          | (58561) | TATTGCACACGCCATGTGAGTTGCAACTTCATCACACATATTATAACGTTTCTTAAGAAGTTCTACAAGTTCTTCACTAGTAACCTTCATCCATGTC |       |       |       |       |       |       |       |       |       |
|                                          | (1)     | -----                                                                                             |       |       |       |       |       |       |       |       |       |
|                                          |         | Section 612                                                                                       |       |       |       |       |       |       |       |       |       |
| T4 NC 000866.4<br>SARS-CoV-2 NC_045512.2 | (58657) | 58657                                                                                             | 58663 | 58674 | 58685 | 58696 | 58707 | 58718 | 58729 | 58740 | 58752 |
|                                          | (58657) | GACGAAAAAATCACCATTAATGATGACGTAGATATTTCTTCTTGATTGAGTGCTTCAATTTTCATGATGTTCTCTCTTTATCCGATGGTTGTAT    |       |       |       |       |       |       |       |       |       |
|                                          | (1)     | -----                                                                                             |       |       |       |       |       |       |       |       |       |
|                                          |         | Section 613                                                                                       |       |       |       |       |       |       |       |       |       |
| T4 NC 000866.4<br>SARS-CoV-2 NC_045512.2 | (58753) | 58753                                                                                             | 58762 | 58773 | 58784 | 58795 | 58806 | 58817 | 58828 | 58848 |       |
|                                          | (58753) | AGTACCACAGCTCAAACGGAAAGTAAACCGGTAAATGAAAAAAGTCTCCCGAAGGAGACTAATGTTATTTCGAGGGAAAGAAGATACTTACTCTG   |       |       |       |       |       |       |       |       |       |
|                                          | (1)     | -----                                                                                             |       |       |       |       |       |       |       |       |       |
|                                          |         | Section 614                                                                                       |       |       |       |       |       |       |       |       |       |
| T4 NC 000866.4<br>SARS-CoV-2 NC_045512.2 | (58849) | 58849                                                                                             | 58861 | 58872 | 58883 | 58894 | 58905 | 58916 | 58927 | 58944 |       |
|                                          | (58849) | GTAAAACATTCCAGTAATATCATCTATCGTGCTTTGGATGGCTGGAGGCATTTCTTTATAAATGCTGTTAGATTGGTCTAGTATGCGATCAATCAT  |       |       |       |       |       |       |       |       |       |
|                                          | (1)     | -----                                                                                             |       |       |       |       |       |       |       |       |       |
|                                          |         | Section 615                                                                                       |       |       |       |       |       |       |       |       |       |
| T4 NC 000866.4<br>SARS-CoV-2 NC_045512.2 | (58945) | 58945                                                                                             | 58960 | 58971 | 58982 | 58993 | 59004 | 59015 | 59026 | 59040 |       |
|                                          | (58945) | TTTAATTGTGTCGGTAGGAAGTTTACTGGCATCTGGAATTGAAGGCGTGATTTTCGACCAGAATACCCCAAATATTGCTCACCAAATTTATCAAT   |       |       |       |       |       |       |       |       |       |
|                                          | (1)     | -----                                                                                             |       |       |       |       |       |       |       |       |       |
|                                          |         | Section 616                                                                                       |       |       |       |       |       |       |       |       |       |
| T4 NC 000866.4<br>SARS-CoV-2 NC_045512.2 | (59041) | 59041                                                                                             | 59048 | 59059 | 59070 | 59081 | 59092 | 59103 | 59114 | 59125 | 59136 |
|                                          | (59041) | CAAATCTGGCAACTCGGAAAAAATAAAATCGTATGCTTTGTGTCTAGCATAACTTTTAGTTTCAAAATGTGCAGAATGAAAATAAGCTTGTGCAGC  |       |       |       |       |       |       |       |       |       |
|                                          | (1)     | -----                                                                                             |       |       |       |       |       |       |       |       |       |



## SARS-CoV-2 &amp; T4.apr

|                                          |         |                                                                                                     |       |       |       |       |       |       |       |
|------------------------------------------|---------|-----------------------------------------------------------------------------------------------------|-------|-------|-------|-------|-------|-------|-------|
|                                          |         | Section 617                                                                                         |       |       |       |       |       |       |       |
| T4 NC 000866.4<br>SARS-CoV-2 NC_045512.2 | (59137) | 59137                                                                                               | 59147 | 59158 | 59169 | 59180 | 59191 | 59202 | 59213 |
|                                          | (59137) | CATTAAATAAACCTAAGTATTCATCTGCCTTTGAAGGTTTTCCACTTTGTGAAAAGTCGCTGAATTTTCATTCAGTCTCCAATTTAATGTTTCATAATT |       |       |       |       |       |       |       |
|                                          |         | Section 618                                                                                         |       |       |       |       |       |       |       |
| T4 NC 000866.4<br>SARS-CoV-2 NC_045512.2 | (59233) | 59233                                                                                               | 59246 | 59257 | 59268 | 59279 | 59290 | 59301 | 59312 |
|                                          | (59233) | CTAGCGTATGATTGTGCCATCTCCGCGCCTCGCTCTATACATTCAAAATCAGAAGAGCACGGGTCATTTTTATAGGTCGTTCTCATAAAACTATAG    |       |       |       |       |       |       |       |
|                                          |         | Section 619                                                                                         |       |       |       |       |       |       |       |
| T4 NC 000866.4<br>SARS-CoV-2 NC_045512.2 | (59329) | 59329                                                                                               | 59334 | 59345 | 59356 | 59367 | 59378 | 59389 | 59400 |
|                                          | (59329) | AATTGTTTCAGACGATTCTACGCTTTTATTTTCAAAAAGCATATAAACGTGCCTAATACCAGATTCCATAAATTTATCAAAATGAGGATCGACATTC   |       |       |       |       |       |       |       |
|                                          |         | Section 620                                                                                         |       |       |       |       |       |       |       |
| T4 NC 000866.4<br>SARS-CoV-2 NC_045512.2 | (59425) | 59425                                                                                               | 59433 | 59444 | 59455 | 59466 | 59477 | 59488 | 59499 |
|                                          | (59425) | GCTTCAATCGATGGAGATAAAACAAATGACAATCCTAGCATGGCAAAAAGTGCTGTTGCTTTTAAGGCCATAAAGGCCTCCTATCATTTTTGTCCT    |       |       |       |       |       |       |       |
|                                          |         | Section 621                                                                                         |       |       |       |       |       |       |       |
| T4 NC 000866.4<br>SARS-CoV-2 NC_045512.2 | (59521) | 59521                                                                                               | 59532 | 59543 | 59554 | 59565 | 59576 | 59587 | 59598 |
|                                          | (59521) | GTATTTACTTTGTGCCGATGCACGGCCTTAACCTTTATCAAGGTATTTTTCAAAATTTTCGCAATCTAGTATAGTCTGCCGGAGATTGGTTGAGTGAT  |       |       |       |       |       |       |       |
|                                          |         | Section 622                                                                                         |       |       |       |       |       |       |       |
| T4 NC 000866.4<br>SARS-CoV-2 NC_045512.2 | (59617) | 59617                                                                                               | 59631 | 59642 | 59653 | 59664 | 59675 | 59686 | 59697 |
|                                          | (59617) | ACTTCTCGACGCAAAGCTGAAATGATATTTCCAACCTCCCTACGAATTTTCATCTAATTGAAGAACAGTAAGATTGCGAAGTTGCTTTTCAGTTAAT   |       |       |       |       |       |       |       |
|                                          |         | Section 623                                                                                         |       |       |       |       |       |       |       |
| T4 NC 000866.4<br>SARS-CoV-2 NC_045512.2 | (59713) | 59713                                                                                               | 59719 | 59730 | 59741 | 59752 | 59763 | 59774 | 59785 |
|                                          | (59713) | TGTAGCATATATACCCCTTTAGTTAGATAAACCTATTTATAACTTTTGCCTAACCGAGCTTTTATAGTTAATTCATTCCAATGTTTTCTACACAAA    |       |       |       |       |       |       |       |

## SARS-CoV-2 &amp; T4.apr

|                                          |         |                                                                                                   |       |       |       |       |       |       |       |
|------------------------------------------|---------|---------------------------------------------------------------------------------------------------|-------|-------|-------|-------|-------|-------|-------|
|                                          |         | Section 624                                                                                       |       |       |       |       |       |       |       |
| T4 NC 000866.4<br>SARS-CoV-2 NC_045512.2 | (59809) | 59809                                                                                             | 59818 | 59829 | 59840 | 59851 | 59862 | 59873 | 59884 |
|                                          | (59809) | GAAACATAAAATTTTCATCACCAATACAAATTTGATTACCTTCTTTAACTGGTGTTCATCTTCCATTAATCGAGCTGTCATAATCGCTTTTTTACCA |       |       |       |       |       |       |       |
|                                          |         | -----                                                                                             |       |       |       |       |       |       |       |
|                                          |         | Section 625                                                                                       |       |       |       |       |       |       |       |
| T4 NC 000866.4<br>SARS-CoV-2 NC_045512.2 | (59905) | 59905                                                                                             | 59917 | 59928 | 59939 | 59950 | 59961 | 59972 | 59983 |
|                                          | (59905) | CAATGACAAACTGCTTTTAGTTCAATAAGTTTATCTGCAATCGCTAAAAGTTCTTTAGAACCTTCAAATAATTTTCAGCGAAATCAGTCCTTAGC   |       |       |       |       |       |       |       |
|                                          |         | -----                                                                                             |       |       |       |       |       |       |       |
|                                          |         | Section 626                                                                                       |       |       |       |       |       |       |       |
| T4 NC 000866.4<br>SARS-CoV-2 NC_045512.2 | (60001) | 60001                                                                                             | 60016 | 60027 | 60038 | 60049 | 60060 | 60071 | 60082 |
|                                          | (60001) | CCATAAGCCATAACAGGAACATTATATGTATCAACAATTCGGCTCAATTGATGCACCTGTTTCAGTTTTTTAAAACTGAGCTTCATCTACAAATACG |       |       |       |       |       |       |       |
|                                          |         | -----                                                                                             |       |       |       |       |       |       |       |
|                                          |         | Section 627                                                                                       |       |       |       |       |       |       |       |
| T4 NC 000866.4<br>SARS-CoV-2 NC_045512.2 | (60097) | 60097                                                                                             | 60104 | 60115 | 60126 | 60137 | 60148 | 60159 | 60170 |
|                                          | (60097) | CAATGAATATCTTTTTGTGCTTCAGCCCATTTATAGAACTCGAAAATATCCATATCATCTGTAATAATATTTCGCTTCCTGCTTAATTCCAATGCGA |       |       |       |       |       |       |       |
|                                          |         | -----                                                                                             |       |       |       |       |       |       |       |
|                                          |         | Section 628                                                                                       |       |       |       |       |       |       |       |
| T4 NC 000866.4<br>SARS-CoV-2 NC_045512.2 | (60193) | 60193                                                                                             | 60203 | 60214 | 60225 | 60236 | 60247 | 60258 | 60269 |
|                                          | (60193) | GAAACGACTTCACAGACAGAATCGCGAGTATCAATAGCAGGCTTAAGAACTAATACTACTCATTCCACGTTCTTTATAATTATGTGCAGCAATCAAA |       |       |       |       |       |       |       |
|                                          |         | -----                                                                                             |       |       |       |       |       |       |       |
|                                          |         | Section 629                                                                                       |       |       |       |       |       |       |       |
| T4 NC 000866.4<br>SARS-CoV-2 NC_045512.2 | (60289) | 60289                                                                                             | 60302 | 60313 | 60324 | 60335 | 60346 | 60357 | 60368 |
|                                          | (60289) | AGAGAAGCAGATTTTCCAGCATTCATTGCTGCATAAGTAAAAATTAACTCGCCATCTTAGTCCTTAGTTAAATTTCTAAATATGTTTCTAAATC    |       |       |       |       |       |       |       |
|                                          |         | -----                                                                                             |       |       |       |       |       |       |       |
|                                          |         | Section 630                                                                                       |       |       |       |       |       |       |       |
| T4 NC 000866.4<br>SARS-CoV-2 NC_045512.2 | (60385) | 60385                                                                                             | 60390 | 60401 | 60412 | 60423 | 60434 | 60445 | 60456 |
|                                          | (60385) | ATTTTCAGCTTTATCGATAGATTTTACTAATTCGTAATATGTTTCGGCATCTCCATATTCAGAAGATATTTCAAAGACAAATCCTTTTCTAAACT   |       |       |       |       |       |       |       |
|                                          |         | -----                                                                                             |       |       |       |       |       |       |       |

## SARS-CoV-2 &amp; T4.apr

|                                          |         |                                                                                                   |       |       |       |       |       |       |       |             |       |
|------------------------------------------|---------|---------------------------------------------------------------------------------------------------|-------|-------|-------|-------|-------|-------|-------|-------------|-------|
|                                          |         |                                                                                                   |       |       |       |       |       |       |       | Section 631 |       |
| T4 NC 000866.4<br>SARS-CoV-2 NC_045512.2 | (60481) | 60481                                                                                             | 60489 | 60500 | 60511 | 60522 | 60533 | 60544 | 60555 | 60576       |       |
|                                          | (60481) | AATAATTTACCAACTAAAAATAATATTTTCGTTCTTTTGTTTCGCGAGTAATCATAAGGAATTTATATAATCAATGAGTTCTTGTTCTTTATTATCG |       |       |       |       |       |       |       |             |       |
|                                          | (1)     | -----                                                                                             |       |       |       |       |       |       |       |             |       |
|                                          |         |                                                                                                   |       |       |       |       |       |       |       | Section 632 |       |
| T4 NC 000866.4<br>SARS-CoV-2 NC_045512.2 | (60577) | 60577                                                                                             | 60588 | 60599 | 60610 | 60621 | 60632 | 60643 | 60654 | 60672       |       |
|                                          | (60577) | AATTCTTTAGAAAAGTTCTTCGTACTCGTTTGCGCTAAAAGGACCGCATTCATTACAACTTTTTCCAATTCACATTTTTATCCATAACTTCGTGG   |       |       |       |       |       |       |       |             |       |
|                                          | (1)     | -----                                                                                             |       |       |       |       |       |       |       |             |       |
|                                          |         |                                                                                                   |       |       |       |       |       |       |       | Section 633 |       |
| T4 NC 000866.4<br>SARS-CoV-2 NC_045512.2 | (60673) | 60673                                                                                             | 60687 | 60698 | 60709 | 60720 | 60731 | 60742 | 60753 | 60768       |       |
|                                          | (60673) | ATAAGAGAAAAAGAGTGTGTCTTTTTGTTCTTTGCTTAAACTCATAACCATGTCACCTTTAAGCAGTATTCTTCTACATGCTGTTTACGACCTTTCT |       |       |       |       |       |       |       |             |       |
|                                          | (1)     | -----                                                                                             |       |       |       |       |       |       |       |             |       |
|                                          |         |                                                                                                   |       |       |       |       |       |       |       | Section 634 |       |
| T4 NC 000866.4<br>SARS-CoV-2 NC_045512.2 | (60769) | 60769                                                                                             | 60775 | 60786 | 60797 | 60808 | 60819 | 60830 | 60841 | 60852       | 60864 |
|                                          | (60769) | TATCAATAAAGGTATATTCAACGAATGTTCCAATGTAGTCTTTATCTACATCATGTGGACTATTAATTGGACATTTAGTGCGACAAATGCGTTTCCC |       |       |       |       |       |       |       |             |       |
|                                          | (1)     | -----                                                                                             |       |       |       |       |       |       |       |             |       |
|                                          |         |                                                                                                   |       |       |       |       |       |       |       | Section 635 |       |
| T4 NC 000866.4<br>SARS-CoV-2 NC_045512.2 | (60865) | 60865                                                                                             | 60874 | 60885 | 60896 | 60907 | 60918 | 60929 | 60940 | 60960       |       |
|                                          | (60865) | ATTGACGAATAATTACTGCCTTATTCTTTGGGTCATATGGATGTGGATAATGTATATTCATAATAATGGTTCCCAATCAACAATCACAATTTCTAA  |       |       |       |       |       |       |       |             |       |
|                                          | (1)     | -----                                                                                             |       |       |       |       |       |       |       |             |       |
|                                          |         |                                                                                                   |       |       |       |       |       |       |       | Section 636 |       |
| T4 NC 000866.4<br>SARS-CoV-2 NC_045512.2 | (60961) | 60961                                                                                             | 60973 | 60984 | 60995 | 61006 | 61017 | 61028 | 61039 | 61056       |       |
|                                          | (60961) | TTTAGAGGAATATGTATCTAAAATCCCCTCAATAATATCCCAGTTCCTTTACCTATGCCTGCACCAATCCTAGGCATATAGATTGTAGGTTTAAT   |       |       |       |       |       |       |       |             |       |
|                                          | (1)     | -----                                                                                             |       |       |       |       |       |       |       |             |       |
|                                          |         |                                                                                                   |       |       |       |       |       |       |       | Section 637 |       |
| T4 NC 000866.4<br>SARS-CoV-2 NC_045512.2 | (61057) | 61057                                                                                             | 61072 | 61083 | 61094 | 61105 | 61116 | 61127 | 61138 | 61152       |       |
|                                          | (61057) | CAGTTTATTTTCACCAAACATTTAATTCTAACATACAATTCATTAAAGCGGAATACTCAAAATTTGGCCCTGGTTGAAATTGAGTATAAAGATT    |       |       |       |       |       |       |       |             |       |
|                                          | (1)     | -----                                                                                             |       |       |       |       |       |       |       |             |       |

## SARS-CoV-2 &amp; T4.apr

|                                          |         |                                                                                                   |       |       |       |       |       |       |       |       |       |
|------------------------------------------|---------|---------------------------------------------------------------------------------------------------|-------|-------|-------|-------|-------|-------|-------|-------|-------|
| Section 638                              |         |                                                                                                   |       |       |       |       |       |       |       |       |       |
| T4 NC 000866.4<br>SARS-CoV-2 NC_045512.2 | (61153) | 61153                                                                                             | 61160 | 61171 | 61182 | 61193 | 61204 | 61215 | 61226 | 61237 | 61248 |
|                                          | (61153) | GAAGCAGTAAGCTTTATGAGTCCTAAAGTATTTTTTCATAGACTGAGTAAGAACCGAGTTTAGTTACATCACCCATTTCAGTCTGTAATTTATCAGC |       |       |       |       |       |       |       |       |       |
|                                          | (1)     | -----                                                                                             |       |       |       |       |       |       |       |       |       |
| Section 639                              |         |                                                                                                   |       |       |       |       |       |       |       |       |       |
| T4 NC 000866.4<br>SARS-CoV-2 NC_045512.2 | (61249) | 61249                                                                                             | 61259 | 61270 | 61281 | 61292 | 61303 | 61314 | 61325 | 61344 |       |
|                                          | (61249) | TTCCAAAATTTTAGGGAAAGCTTTGGTTAATTGACCCGCTACGCCTGAACCCATAGTATGAAAACAATTACATCCATGTGCAATATTTTTACCTTC  |       |       |       |       |       |       |       |       |       |
|                                          | (1)     | -----                                                                                             |       |       |       |       |       |       |       |       |       |
| Section 640                              |         |                                                                                                   |       |       |       |       |       |       |       |       |       |
| T4 NC 000866.4<br>SARS-CoV-2 NC_045512.2 | (61345) | 61345                                                                                             | 61358 | 61369 | 61380 | 61391 | 61402 | 61413 | 61424 | 61440 |       |
|                                          | (61345) | AGCGAAAAGGGCGACAATATCGCCCTTGATATATTTTACAATCATCTAGTACTCAATCCTCGATTATAAGAATCTACCAAACGGTCAACCATTGAA  |       |       |       |       |       |       |       |       |       |
|                                          | (1)     | -----                                                                                             |       |       |       |       |       |       |       |       |       |
| Section 641                              |         |                                                                                                   |       |       |       |       |       |       |       |       |       |
| T4 NC 000866.4<br>SARS-CoV-2 NC_045512.2 | (61441) | 61441                                                                                             | 61446 | 61457 | 61468 | 61479 | 61490 | 61501 | 61512 | 61523 | 61536 |
|                                          | (61441) | TGACAAGCGGCTTTATCTTTCTCCTCCGCAACTGAACATTCTAAGGTATTCCACTTTTTAGCATATCGTTTTAACAATGTATCGTTTTTGTATCTG  |       |       |       |       |       |       |       |       |       |
|                                          | (1)     | -----                                                                                             |       |       |       |       |       |       |       |       |       |
| Section 642                              |         |                                                                                                   |       |       |       |       |       |       |       |       |       |
| T4 NC 000866.4<br>SARS-CoV-2 NC_045512.2 | (61537) | 61537                                                                                             | 61545 | 61556 | 61567 | 61578 | 61589 | 61600 | 61611 | 61632 |       |
|                                          | (61537) | CTTGATTTATCTCTTTCTCCGTCTTTATATGCATATATTAATTTCTGTGCAAATTCAGCTTGGCATGCCTTATTTTTCCCACAATAATCTGCCGCA  |       |       |       |       |       |       |       |       |       |
|                                          | (1)     | -----                                                                                             |       |       |       |       |       |       |       |       |       |
| Section 643                              |         |                                                                                                   |       |       |       |       |       |       |       |       |       |
| T4 NC 000866.4<br>SARS-CoV-2 NC_045512.2 | (61633) | 61633                                                                                             | 61644 | 61655 | 61666 | 61677 | 61688 | 61699 | 61710 | 61728 |       |
|                                          | (61633) | GTGCGGTTTACATATTCTCTAATTTTCAGTATATGATGTATCTGCTGACGCAGAAGCAGAAAATGAAATTAATCCTATACATAAAACCAAATTTTA  |       |       |       |       |       |       |       |       |       |
|                                          | (1)     | -----                                                                                             |       |       |       |       |       |       |       |       |       |
| Section 644                              |         |                                                                                                   |       |       |       |       |       |       |       |       |       |
| T4 NC 000866.4<br>SARS-CoV-2 NC_045512.2 | (61729) | 61729                                                                                             | 61743 | 61754 | 61765 | 61776 | 61787 | 61798 | 61809 | 61824 |       |
|                                          | (61729) | GTCATTTACTATTTCCAAAAGTTTATTATTTTTAAGGTAATTAGCCTTTTCTAGGACTTCAGAAGCATATTTAGAACCTGCTTTAACATTCCATCC  |       |       |       |       |       |       |       |       |       |
|                                          | (1)     | -----                                                                                             |       |       |       |       |       |       |       |       |       |

## SARS-CoV-2 &amp; T4.apr

|                                          |         |                                                                                                   |       |       |       |       |       |       |       |       |       |
|------------------------------------------|---------|---------------------------------------------------------------------------------------------------|-------|-------|-------|-------|-------|-------|-------|-------|-------|
| Section 645                              |         |                                                                                                   |       |       |       |       |       |       |       |       |       |
| T4 NC 000866.4<br>SARS-CoV-2 NC_045512.2 | (61825) | 61825                                                                                             | 61831 | 61842 | 61853 | 61864 | 61875 | 61886 | 61897 | 61908 | 61920 |
|                                          | (61825) | CGAATTATAAGAGGATATTGCTTTTCTTATATCGCCCTTATGTATATTTAACCAATAAGAAAGTTCAATGTACGCCCAGGAAGCTGAATTGGATCG  |       |       |       |       |       |       |       |       |       |
|                                          | (1)     | -----                                                                                             |       |       |       |       |       |       |       |       |       |
| Section 646                              |         |                                                                                                   |       |       |       |       |       |       |       |       |       |
| T4 NC 000866.4<br>SARS-CoV-2 NC_045512.2 | (61921) | 61921                                                                                             | 61930 | 61941 | 61952 | 61963 | 61974 | 61985 | 61996 | 62016 |       |
|                                          | (61921) | TTTATTCAACATTCTTTTATTTTTCAGCATCGGTCATATTATAACCAAGTTCCTTAACTCTTGCTCGCATAGTAGGCAAATAATTTTGAACATTCC  |       |       |       |       |       |       |       |       |       |
|                                          | (1)     | -----                                                                                             |       |       |       |       |       |       |       |       |       |
| Section 647                              |         |                                                                                                   |       |       |       |       |       |       |       |       |       |
| T4 NC 000866.4<br>SARS-CoV-2 NC_045512.2 | (62017) | 62017                                                                                             | 62029 | 62040 | 62051 | 62062 | 62073 | 62084 | 62095 | 62112 |       |
|                                          | (62017) | GTAGGCGTGATGCTTTGGTTTAGATTTTAAATTAACCTCCGCCAGAGCTTTCTTGCCATAAAATGGCAGCCATTATATGACCTAATCCGCTCTTGTG |       |       |       |       |       |       |       |       |       |
|                                          | (1)     | -----                                                                                             |       |       |       |       |       |       |       |       |       |
| Section 648                              |         |                                                                                                   |       |       |       |       |       |       |       |       |       |
| T4 NC 000866.4<br>SARS-CoV-2 NC_045512.2 | (62113) | 62113                                                                                             | 62128 | 62139 | 62150 | 62161 | 62172 | 62183 | 62194 | 62208 |       |
|                                          | (62113) | GATATTTTTGTGTGTTTTATTTTCCATCCTTAGAAAATTGTTCCCCGAATTGATACGCGTAACGCATGTTATCGAGTTGGACATTACTGAAAGT    |       |       |       |       |       |       |       |       |       |
|                                          | (1)     | -----                                                                                             |       |       |       |       |       |       |       |       |       |
| Section 649                              |         |                                                                                                   |       |       |       |       |       |       |       |       |       |
| T4 NC 000866.4<br>SARS-CoV-2 NC_045512.2 | (62209) | 62209                                                                                             | 62216 | 62227 | 62238 | 62249 | 62260 | 62271 | 62282 | 62293 | 62304 |
|                                          | (62209) | ATGCTCGGAGCTATGTGCCATCATTGAAATGGCCAATAGACCAGCGAGTAGTGCTTTTCTCATGCTTACCTCATTGAGTTTTAATTACTGCTTTAG  |       |       |       |       |       |       |       |       |       |
|                                          | (1)     | -----                                                                                             |       |       |       |       |       |       |       |       |       |
| Section 650                              |         |                                                                                                   |       |       |       |       |       |       |       |       |       |
| T4 NC 000866.4<br>SARS-CoV-2 NC_045512.2 | (62305) | 62305                                                                                             | 62315 | 62326 | 62337 | 62348 | 62359 | 62370 | 62381 | 62400 |       |
|                                          | (62305) | AAGCCTTTTCCTGGTAAACGACGACTGTTGATAATTGCCATCCTACATTGAAGTGACGGGTCTTTGAACTTCTCGTTAGGTTTACAACTGTAAATC  |       |       |       |       |       |       |       |       |       |
|                                          | (1)     | -----                                                                                             |       |       |       |       |       |       |       |       |       |
| Section 651                              |         |                                                                                                   |       |       |       |       |       |       |       |       |       |
| T4 NC 000866.4<br>SARS-CoV-2 NC_045512.2 | (62401) | 62401                                                                                             | 62414 | 62425 | 62436 | 62447 | 62458 | 62469 | 62480 | 62496 |       |
|                                          | (62401) | CAAGCCAAAGATTTCCATCTGTGATTTCTAAACGTCCAGGACGATATTCAACCCCATCAATAAAATCCTCGTCAATGTCAGGACGCGGAGGCATAC  |       |       |       |       |       |       |       |       |       |
|                                          | (1)     | -----                                                                                             |       |       |       |       |       |       |       |       |       |

## SARS-CoV-2 &amp; T4.apr

|                                          |         |                                                                                                   |       |       |       |       |       |       |       |       |       |
|------------------------------------------|---------|---------------------------------------------------------------------------------------------------|-------|-------|-------|-------|-------|-------|-------|-------|-------|
|                                          |         | Section 652                                                                                       |       |       |       |       |       |       |       |       |       |
| T4 NC 000866.4<br>SARS-CoV-2 NC_045512.2 | (62497) | 62497                                                                                             | 62502 | 62513 | 62524 | 62535 | 62546 | 62557 | 62568 | 62579 | 62592 |
|                                          | (62497) | TCAGGAATTCATTAACTTCTAAAAACATGGTCTTTTATTTTATGGAATAATTCAAAAACGTATGTCTCATCAATCTCCCGTTGAATTGCGCGATCAA |       |       |       |       |       |       |       |       |       |
|                                          | (1)     | -----                                                                                             |       |       |       |       |       |       |       |       |       |
|                                          |         | Section 653                                                                                       |       |       |       |       |       |       |       |       |       |
| T4 NC 000866.4<br>SARS-CoV-2 NC_045512.2 | (62593) | 62593                                                                                             | 62601 | 62612 | 62623 | 62634 | 62645 | 62656 | 62667 |       | 62688 |
|                                          | (62593) | GAAGATGTTGAGAATATTTTAGATGAAACGATGAGACTCCTGCTGCTTTTGATGCCTCACGAATCTCATTGTTAATTTGACGAAACTCCGACTCAA  |       |       |       |       |       |       |       |       |       |
|                                          | (1)     | -----                                                                                             |       |       |       |       |       |       |       |       |       |
|                                          |         | Section 654                                                                                       |       |       |       |       |       |       |       |       |       |
| T4 NC 000866.4<br>SARS-CoV-2 NC_045512.2 | (62689) | 62689                                                                                             | 62700 | 62711 | 62722 | 62733 | 62744 | 62755 | 62766 |       | 62784 |
|                                          | (62689) | AGTGACGACGAAGCTTATTTTCGACGGATAAAAACTTCTGTATTGATAGTCATGTTATTCTCTCTTAACTGATAGAAAAATTATACCACAGTCAAG  |       |       |       |       |       |       |       |       |       |
|                                          | (1)     | -----                                                                                             |       |       |       |       |       |       |       |       |       |
|                                          |         | Section 655                                                                                       |       |       |       |       |       |       |       |       |       |
| T4 NC 000866.4<br>SARS-CoV-2 NC_045512.2 | (62785) | 62785                                                                                             | 62799 | 62810 | 62821 | 62832 | 62843 | 62854 | 62865 |       | 62880 |
|                                          | (62785) | AGGAAAAGTAAACAGTTATTCTTTAAATCTAATCAATTTATTCATAGACTTTGAAACTTCGGCACGAACCTCATGTAGATTTTTGAGCTGTTCAAG  |       |       |       |       |       |       |       |       |       |
|                                          | (1)     | -----                                                                                             |       |       |       |       |       |       |       |       |       |
|                                          |         | Section 656                                                                                       |       |       |       |       |       |       |       |       |       |
| T4 NC 000866.4<br>SARS-CoV-2 NC_045512.2 | (62881) | 62881                                                                                             | 62887 | 62898 | 62909 | 62920 | 62931 | 62942 | 62953 | 62964 | 62976 |
|                                          | (62881) | ACGCTGCGTATAGTAAGCAATTCATCTTCTTCGAGACAGTCCTGCGAATCTTCTTTAAGATAACGTGCATAGTCCTGGAAAGCGTTACGGACTAC   |       |       |       |       |       |       |       |       |       |
|                                          | (1)     | -----                                                                                             |       |       |       |       |       |       |       |       |       |
|                                          |         | Section 657                                                                                       |       |       |       |       |       |       |       |       |       |
| T4 NC 000866.4<br>SARS-CoV-2 NC_045512.2 | (62977) | 62977                                                                                             | 62986 | 62997 | 63008 | 63019 | 63030 | 63041 | 63052 |       | 63072 |
|                                          | (62977) | TTCTTGGAAGTCATCAAGACTTTGAATTTTCTTAGGAGCAACAGATACACGACGAGGGGCAGTATAATACTCATAACCAAACCTGCGCTTAATTG   |       |       |       |       |       |       |       |       |       |
|                                          | (1)     | -----                                                                                             |       |       |       |       |       |       |       |       |       |
|                                          |         | Section 658                                                                                       |       |       |       |       |       |       |       |       |       |
| T4 NC 000866.4<br>SARS-CoV-2 NC_045512.2 | (63073) | 63073                                                                                             | 63085 | 63096 | 63107 | 63118 | 63129 | 63140 | 63151 |       | 63168 |
|                                          | (63073) | AGCCATTAGTATTTTTCTCTGGTTGGAACACTGCACGACAAGCCCACATACTGGCTTCTTTGAGTTTCGTTTTAGCAATAGTTAACTGATCGAGA   |       |       |       |       |       |       |       |       |       |
|                                          | (1)     | -----                                                                                             |       |       |       |       |       |       |       |       |       |

## SARS-CoV-2 &amp; T4.apr

|                                          |                |                                                                                                   |       |       |       |       |       |       |       |       |       |
|------------------------------------------|----------------|---------------------------------------------------------------------------------------------------|-------|-------|-------|-------|-------|-------|-------|-------|-------|
|                                          |                | Section 659                                                                                       |       |       |       |       |       |       |       |       |       |
| T4 NC 000866.4<br>SARS-CoV-2 NC_045512.2 | (63169)        | 63169                                                                                             | 63184 | 63195 | 63206 | 63217 | 63228 | 63239 | 63250 | 63264 |       |
|                                          | (63169)<br>(1) | CTTTCAGCATAATTCTTCGCGAATTCACAGTCTTCGCAATTATCTAGTGCTTCCCAGAATTCATCATATAAAGCATCAAAGATAAGTCCTAAACGA  |       |       |       |       |       |       |       |       |       |
|                                          |                | Section 660                                                                                       |       |       |       |       |       |       |       |       |       |
| T4 NC 000866.4<br>SARS-CoV-2 NC_045512.2 | (63265)        | 63265                                                                                             | 63272 | 63283 | 63294 | 63305 | 63316 | 63327 | 63338 | 63349 | 63360 |
|                                          | (63265)<br>(1) | ACTTCAGCGTCTTTAATAGCATTTACTTTACCGATTTTCTCTTCAGTATGTGGTTTATAACCCTTAATATCTTCAATCATATTTGACTTCCTCACC  |       |       |       |       |       |       |       |       |       |
|                                          |                | Section 661                                                                                       |       |       |       |       |       |       |       |       |       |
| T4 NC 000866.4<br>SARS-CoV-2 NC_045512.2 | (63361)        | 63361                                                                                             | 63371 | 63382 | 63393 | 63404 | 63415 | 63426 | 63437 | 63456 |       |
|                                          | (63361)<br>(1) | AGTACATAATACGTATTCAACTAAACGAATAGGTTTCATGAATGCCATAGCCTTGAACAGAAATTTCTGTCGTAGGATAAATTCCATCAATATCACC |       |       |       |       |       |       |       |       |       |
|                                          |                | Section 662                                                                                       |       |       |       |       |       |       |       |       |       |
| T4 NC 000866.4<br>SARS-CoV-2 NC_045512.2 | (63457)        | 63457                                                                                             | 63470 | 63481 | 63492 | 63503 | 63514 | 63525 | 63536 | 63552 |       |
|                                          | (63457)<br>(1) | CATATTCCACGCTTCATTAAATTGCTGTTGCGCTGAGTTACTAAACCACTCGCGAAAGCATTTAGCACATCTTCAGAACCTTCAATAATTATCTTT  |       |       |       |       |       |       |       |       |       |
|                                          |                | Section 663                                                                                       |       |       |       |       |       |       |       |       |       |
| T4 NC 000866.4<br>SARS-CoV-2 NC_045512.2 | (63553)        | 63553                                                                                             | 63558 | 63569 | 63580 | 63591 | 63602 | 63613 | 63624 | 63635 | 63648 |
|                                          | (63553)<br>(1) | GCCATTACAAACTTTTCAGTAAAGGTACGAGCGATAACGTCGCGCTGCTGTTCCGGAGTCAGAGAGTTAAAGCGAACTGCATAACCGGATACACGGA |       |       |       |       |       |       |       |       |       |
|                                          |                | Section 664                                                                                       |       |       |       |       |       |       |       |       |       |
| T4 NC 000866.4<br>SARS-CoV-2 NC_045512.2 | (63649)        | 63649                                                                                             | 63657 | 63668 | 63679 | 63690 | 63701 | 63712 | 63723 | 63744 |       |
|                                          | (63649)<br>(1) | TGGTCAGCTGCGGATATTTTCCGGATGCTTAAGTGCATCTTCCAGAGTTTCATGACGCAGAACGTTAACGTTTCAGGTGTTGACCACCTTCAATTT  |       |       |       |       |       |       |       |       |       |
|                                          |                | Section 665                                                                                       |       |       |       |       |       |       |       |       |       |
| T4 NC 000866.4<br>SARS-CoV-2 NC_045512.2 | (63745)        | 63745                                                                                             | 63756 | 63767 | 63778 | 63789 | 63800 | 63811 | 63822 | 63840 |       |
|                                          | (63745)<br>(1) | TAACTGTAGGTTGTGGCTCAATTTCAATTTACGGGCATGCAAACCATAGAAAATTTCTGGGTCTACAAAAGAGTCCTCTTTAAAGGTTTTAGAGA   |       |       |       |       |       |       |       |       |       |

## SARS-CoV-2 &amp; T4.apr

|                                          |         |                                                                                                   |       |       |       |       |       |       |       |
|------------------------------------------|---------|---------------------------------------------------------------------------------------------------|-------|-------|-------|-------|-------|-------|-------|
|                                          |         | Section 666                                                                                       |       |       |       |       |       |       |       |
| T4 NC 000866.4<br>SARS-CoV-2 NC_045512.2 | (63841) | 63841                                                                                             | 63855 | 63866 | 63877 | 63888 | 63899 | 63910 | 63921 |
|                                          | (63841) | CAATAATTCGTGCTTGAATACCATCTTCAAAATAAATAGTACCTTTATGTGTGCCTTCAAGAATTTGATATGCTTTCATATAAACCTCAATTAGAA  |       |       |       |       |       |       |       |
|                                          | (1)     | -----                                                                                             |       |       |       |       |       |       |       |
|                                          |         | Section 667                                                                                       |       |       |       |       |       |       |       |
| T4 NC 000866.4<br>SARS-CoV-2 NC_045512.2 | (63937) | 63937                                                                                             | 63943 | 63954 | 63965 | 63976 | 63987 | 63998 | 64009 |
|                                          | (63937) | AATAAATTTATCCAAGATTGTTCTTTAATTAAAAATGGCTCAGAATCATATGCCATTAACTTTGCGTAATTAATCCTTTAAAGGTCCATCAATA    |       |       |       |       |       |       |       |
|                                          | (1)     | -----                                                                                             |       |       |       |       |       |       |       |
|                                          |         | Section 668                                                                                       |       |       |       |       |       |       |       |
| T4 NC 000866.4<br>SARS-CoV-2 NC_045512.2 | (64033) | 64033                                                                                             | 64042 | 64053 | 64064 | 64075 | 64086 | 64097 | 64108 |
|                                          | (64033) | AATTCATGGTAAAAATATGGAATTTTATTCATTAGCCGTGCATTAGGAGCAGTGCACAAAACCTCTGCATCCTTTGAATACGCCTTTTTGTAATTTG |       |       |       |       |       |       |       |
|                                          | (1)     | -----                                                                                             |       |       |       |       |       |       |       |
|                                          |         | Section 669                                                                                       |       |       |       |       |       |       |       |
| T4 NC 000866.4<br>SARS-CoV-2 NC_045512.2 | (64129) | 64129                                                                                             | 64141 | 64152 | 64163 | 64174 | 64185 | 64196 | 64207 |
|                                          | (64129) | TATTGCTTGGGATAAAATTCGCTCAAAATGTTATTTTTTGCCAAAATTTCAAAATGATTACCAATTTATTTTTAATAGTTTTTGGCGAAAAATAA   |       |       |       |       |       |       |       |
|                                          | (1)     | -----                                                                                             |       |       |       |       |       |       |       |
|                                          |         | Section 670                                                                                       |       |       |       |       |       |       |       |
| T4 NC 000866.4<br>SARS-CoV-2 NC_045512.2 | (64225) | 64225                                                                                             | 64240 | 64251 | 64262 | 64273 | 64284 | 64295 | 64306 |
|                                          | (64225) | AGATATTCGAAAAGCTGAGTGTCTGTCATCATTGCATTCCGATTACGAAAACTGTGGACGAGTAATACCACCAATGCAACATTTACTATTACAGC   |       |       |       |       |       |       |       |
|                                          | (1)     | -----                                                                                             |       |       |       |       |       |       |       |
|                                          |         | Section 671                                                                                       |       |       |       |       |       |       |       |
| T4 NC 000866.4<br>SARS-CoV-2 NC_045512.2 | (64321) | 64321                                                                                             | 64328 | 64339 | 64350 | 64361 | 64372 | 64383 | 64394 |
|                                          | (64321) | AGTAGTGTACGGTGTCAATATGGACACTATAAATCTTATCCATATCAGGAGATTTGACAGGCTCATCAATTATATACAAAATTCGCGAAAGCTTTA  |       |       |       |       |       |       |       |
|                                          | (1)     | -----                                                                                             |       |       |       |       |       |       |       |
|                                          |         | Section 672                                                                                       |       |       |       |       |       |       |       |
| T4 NC 000866.4<br>SARS-CoV-2 NC_045512.2 | (64417) | 64417                                                                                             | 64427 | 64438 | 64449 | 64460 | 64471 | 64482 | 64493 |
|                                          | (64417) | AACCTCTGAACCTTGCTTCCTTTATTACCAATAAACTGCGTACAGAATCAGTAAATAAACGAAAACGTATATCATCATTAGAATAACGCGAAAATT  |       |       |       |       |       |       |       |
|                                          | (1)     | -----                                                                                             |       |       |       |       |       |       |       |
|                                          |         | 64512                                                                                             |       |       |       |       |       |       |       |



## SARS-CoV-2 &amp; T4.apr

|                                          |                |                                                                                                             |       |       |       |       |       |       |       |       |       |
|------------------------------------------|----------------|-------------------------------------------------------------------------------------------------------------|-------|-------|-------|-------|-------|-------|-------|-------|-------|
|                                          |                | Section 673                                                                                                 |       |       |       |       |       |       |       |       |       |
| T4 NC 000866.4<br>SARS-CoV-2 NC_045512.2 | (64513)        | 64513                                                                                                       | 64526 | 64537 | 64548 | 64559 | 64570 | 64581 | 64592 | 64608 |       |
|                                          | (64513)<br>(1) | CCTTTTTGATGTTATTTGCAGAAATTTTAGCATAAGCTGAAGTATTAGAAAGAACAATAACTGTTCCGCCATCATACAACCAATTAGCAGCAAAGT<br>-----   |       |       |       |       |       |       |       |       |       |
|                                          |                | Section 674                                                                                                 |       |       |       |       |       |       |       |       |       |
| T4 NC 000866.4<br>SARS-CoV-2 NC_045512.2 | (64609)        | 64609                                                                                                       | 64614 | 64625 | 64636 | 64647 | 64658 | 64669 | 64680 | 64691 | 64704 |
|                                          | (64609)<br>(1) | TAGTCACAGCAATTGATTTACCGGATTGACGTCCACCATCTAGTCGAAGTGTTACAATACTGTTTAAGTAAGTCTTCAAATGGCGGGATATATTCGT<br>-----  |       |       |       |       |       |       |       |       |       |
|                                          |                | Section 675                                                                                                 |       |       |       |       |       |       |       |       |       |
| T4 NC 000866.4<br>SARS-CoV-2 NC_045512.2 | (64705)        | 64705                                                                                                       | 64713 | 64724 | 64735 | 64746 | 64757 | 64768 | 64779 | 64800 |       |
|                                          | (64705)<br>(1) | TTTTACAAATTTCTTCTACTCTAGCATCAGAATGGTGTGTAAAAGCATTTCATCAGGGATAGATAAGGACCAGTTAAAAATGTTCTCATTTCCTTCTC<br>----- |       |       |       |       |       |       |       |       |       |
|                                          |                | Section 676                                                                                                 |       |       |       |       |       |       |       |       |       |
| T4 NC 000866.4<br>SARS-CoV-2 NC_045512.2 | (64801)        | 64801                                                                                                       | 64812 | 64823 | 64834 | 64845 | 64856 | 64867 | 64878 | 64896 |       |
|                                          | (64801)<br>(1) | TATAAGCTCTATAAGTTTGGGCCATTCCGTGGCACATGAATTGTCCATTTCTGTATTTACCCATTACCGCGCTTGGGCTCGACCTTATTACAGGTT<br>-----   |       |       |       |       |       |       |       |       |       |
|                                          |                | Section 677                                                                                                 |       |       |       |       |       |       |       |       |       |
| T4 NC 000866.4<br>SARS-CoV-2 NC_045512.2 | (64897)        | 64897                                                                                                       | 64911 | 64922 | 64933 | 64944 | 64955 | 64966 | 64977 | 64992 |       |
|                                          | (64897)<br>(1) | GGCGGGAATCCCTCATATAATCATGAGGTCCAGGTTGTTCCCTTATGCATAAATCGCCTTACCGTAGTATTTGTACCAAGTAGGACGTTGTGCAAT<br>-----   |       |       |       |       |       |       |       |       |       |
|                                          |                | Section 678                                                                                                 |       |       |       |       |       |       |       |       |       |
| T4 NC 000866.4<br>SARS-CoV-2 NC_045512.2 | (64993)        | 64993                                                                                                       | 64999 | 65010 | 65021 | 65032 | 65043 | 65054 | 65065 | 65076 | 65088 |
|                                          | (64993)<br>(1) | TTTTTCATCTAAACGAGCTTGTGATATAGCAATAGAAGCTTCATGGGGAATATAATCACCACGGAATTCTGAGGAATATCACTAATATCCTGGAC<br>-----    |       |       |       |       |       |       |       |       |       |
|                                          |                | Section 679                                                                                                 |       |       |       |       |       |       |       |       |       |
| T4 NC 000866.4<br>SARS-CoV-2 NC_045512.2 | (65089)        | 65089                                                                                                       | 65098 | 65109 | 65120 | 65131 | 65142 | 65153 | 65164 | 65184 |       |
|                                          | (65089)<br>(1) | TGTAGTATCCTTGATATTAACCACGTTTTAAACATTCAGCTATAAGCTCAATTTGACGTTTACGTAAGAACTCGAGCTTATCGTAAAGAATGT<br>-----      |       |       |       |       |       |       |       |       |       |

## SARS-CoV-2 &amp; T4.apr

|                                          |                |                                                                                                            |       |       |       |       |       |       |       |       |       |
|------------------------------------------|----------------|------------------------------------------------------------------------------------------------------------|-------|-------|-------|-------|-------|-------|-------|-------|-------|
|                                          |                | Section 680                                                                                                |       |       |       |       |       |       |       |       |       |
| T4 NC 000866.4<br>SARS-CoV-2 NC_045512.2 | (65185)        | 65185                                                                                                      | 65197 | 65208 | 65219 | 65230 | 65241 | 65252 | 65263 | 65280 |       |
|                                          | (65185)<br>(1) | AACATGACCTGCGCCAAGGATAAAAGTAGGACTGATTTTAAAATCACGAACACGTTTACCGTTAGCAACATGCTTACGAACTGCACCAAAAACACG<br>-----  |       |       |       |       |       |       |       |       |       |
|                                          |                | Section 681                                                                                                |       |       |       |       |       |       |       |       |       |
| T4 NC 000866.4<br>SARS-CoV-2 NC_045512.2 | (65281)        | 65281                                                                                                      | 65296 | 65307 | 65318 | 65329 | 65340 | 65351 | 65362 | 65376 |       |
|                                          | (65281)<br>(1) | CGGCAATTCACGATATTCAGCCATTAAGTGTGGTCAGCCAATTCAGATACTAAAGTAAGGTTGATACGAGTCATTTTAGTGTTCCTGTTAGTTG<br>-----    |       |       |       |       |       |       |       |       |       |
|                                          |                | Section 682                                                                                                |       |       |       |       |       |       |       |       |       |
| T4 NC 000866.4<br>SARS-CoV-2 NC_045512.2 | (65377)        | 65377                                                                                                      | 65384 | 65395 | 65406 | 65417 | 65428 | 65439 | 65450 | 65461 | 65472 |
|                                          | (65377)<br>(1) | ATAGGTCTATAGTATCATACCTACAGGAGATGTAAACTGTTATTTATCTTTAATTGCTTTAGCTGCTTCGATAGCCGCTTGCTGAAGGTCATCCAT<br>-----  |       |       |       |       |       |       |       |       |       |
|                                          |                | Section 683                                                                                                |       |       |       |       |       |       |       |       |       |
| T4 NC 000866.4<br>SARS-CoV-2 NC_045512.2 | (65473)        | 65473                                                                                                      | 65483 | 65494 | 65505 | 65516 | 65527 | 65538 | 65549 | 65568 |       |
|                                          | (65473)<br>(1) | AGACATGCCGAACCTTAGAAGCAAAGTTATCAATTTTCTTTTCGACGGCATTCAAAGGCTTGGCCTGTTTACCTTCATTAGCGCCAGGAAGAGCGAG<br>----- |       |       |       |       |       |       |       |       |       |
|                                          |                | Section 684                                                                                                |       |       |       |       |       |       |       |       |       |
| T4 NC 000866.4<br>SARS-CoV-2 NC_045512.2 | (65569)        | 65569                                                                                                      | 65582 | 65593 | 65604 | 65615 | 65626 | 65637 | 65648 | 65664 |       |
|                                          | (65569)<br>(1) | AATACGCTCTCTGTCAATATAAAGGCTTACAAGTTTCTTACGGTCTTTATCGGGCAAATCATGAAATGAATGGGCCTTTTTATTTACAGCGGCTTC<br>-----  |       |       |       |       |       |       |       |       |       |
|                                          |                | Section 685                                                                                                |       |       |       |       |       |       |       |       |       |
| T4 NC 000866.4<br>SARS-CoV-2 NC_045512.2 | (65665)        | 65665                                                                                                      | 65670 | 65681 | 65692 | 65703 | 65714 | 65725 | 65736 | 65747 | 65760 |
|                                          | (65665)<br>(1) | TAATTTACCTGCGCCCACTCGCGCTTCGGCAATAAATTCTTGATATGTTTTCATATGTTTCCTTTAAATGTAAATATTTTTATTATTCTATCCTAG<br>-----  |       |       |       |       |       |       |       |       |       |
|                                          |                | Section 686                                                                                                |       |       |       |       |       |       |       |       |       |
| T4 NC 000866.4<br>SARS-CoV-2 NC_045512.2 | (65761)        | 65761                                                                                                      | 65769 | 65780 | 65791 | 65802 | 65813 | 65824 | 65835 | 65856 |       |
|                                          | (65761)<br>(1) | AATTGTGATAATATATTCACAATTCTAGGAGTTGTAAACTGCTTTTATTTAAGCGTCCCAAGTATAAGCTTTATTAAGAATTACCACGGGCTGCAT<br>-----  |       |       |       |       |       |       |       |       |       |

## SARS-CoV-2 &amp; T4.apr

|                                          |                |                                                                                                  |       |       |       |       |       |       |       |
|------------------------------------------|----------------|--------------------------------------------------------------------------------------------------|-------|-------|-------|-------|-------|-------|-------|
|                                          |                | Section 687                                                                                      |       |       |       |       |       |       |       |
| T4 NC 000866.4<br>SARS-CoV-2 NC_045512.2 | (65857)        | 65857                                                                                            | 65868 | 65879 | 65890 | 65901 | 65912 | 65923 | 65934 |
|                                          | (65857)<br>(1) | TAGCAACGGCGTAAGCGTACTGAATATTAGCGTCTTTAAACTTACCTTTAGAGGTATCTATTTCTGCCTTAAAGCCGCCTTTAGTCATAACATCGG |       |       |       |       |       |       |       |
|                                          |                | Section 688                                                                                      |       |       |       |       |       |       |       |
| T4 NC 000866.4<br>SARS-CoV-2 NC_045512.2 | (65953)        | 65953                                                                                            | 65967 | 65978 | 65989 | 66000 | 66011 | 66022 | 66033 |
|                                          | (65953)<br>(1) | CAAATTCTTTACGGAAAGCCATTGCATCAAGACCTTTCCATGATGATTTATGCTTGGCAAATTCAAGACCTGCGAAGTTGACAGCTTTAGCCAATT |       |       |       |       |       |       |       |
|                                          |                | Section 689                                                                                      |       |       |       |       |       |       |       |
| T4 NC 000866.4<br>SARS-CoV-2 NC_045512.2 | (66049)        | 66049                                                                                            | 66055 | 66066 | 66077 | 66088 | 66099 | 66110 | 66121 |
|                                          | (66049)<br>(1) | TATTATCAATGACCCATTTACCGGCTTTAGGCACAACTTCGGGCCCTTTCTGTTTAGAGAACAGTTTTAAATTCCAGCGGCGAAGGTCTGCATCAG |       |       |       |       |       |       |       |
|                                          |                | Section 690                                                                                      |       |       |       |       |       |       |       |
| T4 NC 000866.4<br>SARS-CoV-2 NC_045512.2 | (66145)        | 66145                                                                                            | 66154 | 66165 | 66176 | 66187 | 66198 | 66209 | 66220 |
|                                          | (66145)<br>(1) | CTTTAACAAATTCTGAGTCTAAGTTACTAGCAACAACATCTTCAATATGAGCAAATTTAAGTCCGTCAACTTCAATATTTAAATCGGTACGCCAGC |       |       |       |       |       |       |       |
|                                          |                | Section 691                                                                                      |       |       |       |       |       |       |       |
| T4 NC 000866.4<br>SARS-CoV-2 NC_045512.2 | (66241)        | 66241                                                                                            | 66253 | 66264 | 66275 | 66286 | 66297 | 66308 | 66319 |
|                                          | (66241)<br>(1) | GAAGTCCTTCCCAAGCGAAGGCTTTAAAGTCGGAAGCCTTTGTAGCTAAGTACCGTTCAATAGGAGCTGTTTTAGGGTCAAAGCCGTTTCCTGATC |       |       |       |       |       |       |       |
|                                          |                | Section 692                                                                                      |       |       |       |       |       |       |       |
| T4 NC 000866.4<br>SARS-CoV-2 NC_045512.2 | (66337)        | 66337                                                                                            | 66352 | 66363 | 66374 | 66385 | 66396 | 66407 | 66418 |
|                                          | (66337)<br>(1) | GGTAGGTCCACTCATCTTTGTTAATGCCTTTGGCCTTTACTACAGAAGCTTCGGCAATAAATTCTTGATATGTTTTCATATGTTTCCTTTAAATAT |       |       |       |       |       |       |       |
|                                          |                | Section 693                                                                                      |       |       |       |       |       |       |       |
| T4 NC 000866.4<br>SARS-CoV-2 NC_045512.2 | (66433)        | 66433                                                                                            | 66440 | 66451 | 66462 | 66473 | 66484 | 66495 | 66506 |
|                                          | (66433)<br>(1) | TTTAATTAGTAATTGTCTATTCAAGTAATTGTGAATATACTATCACAATTCGAAGAGAAAGTAAACAGCTTTATAGATTTTTATACGCGTCCCAAG |       |       |       |       |       |       |       |

## SARS-CoV-2 &amp; T4.apr

|                                          |         |                                                                                                    |       |       |       |       |       |       |       |
|------------------------------------------|---------|----------------------------------------------------------------------------------------------------|-------|-------|-------|-------|-------|-------|-------|
|                                          |         | Section 694                                                                                        |       |       |       |       |       |       |       |
| T4 NC 000866.4<br>SARS-CoV-2 NC_045512.2 | (66529) | 66529                                                                                              | 66539 | 66550 | 66561 | 66572 | 66583 | 66594 | 66605 |
|                                          | (66529) | TGCCAGTTCTAAACGTTGTAATGACTCGTTTTGCGCGATTAGGTGTTTGATTATACCATATACTTTTAGCTAAGTTAACTGCTGCTTCATCCCAGC   |       |       |       |       |       |       |       |
|                                          |         | -----                                                                                              |       |       |       |       |       |       |       |
|                                          |         | Section 695                                                                                        |       |       |       |       |       |       |       |
| T4 NC 000866.4<br>SARS-CoV-2 NC_045512.2 | (66625) | 66625                                                                                              | 66638 | 66649 | 66660 | 66671 | 66682 | 66693 | 66704 |
|                                          | (66625) | GTTTTTGTTGAAGCATACGTAAAGAGTTAGTAAATCCTGCCACACCGGTTTCTCCCATTTGGAAAACCATATTAATCAATGCACAGCGACGAACCG   |       |       |       |       |       |       |       |
|                                          |         | -----                                                                                              |       |       |       |       |       |       |       |
|                                          |         | Section 696                                                                                        |       |       |       |       |       |       |       |
| T4 NC 000866.4<br>SARS-CoV-2 NC_045512.2 | (66721) | 66721                                                                                              | 66726 | 66737 | 66748 | 66759 | 66770 | 66781 | 66792 |
|                                          | (66721) | CATCAAGAGAATCATAAACCGGTTTTAATTTAGCATTTTCTCAGAATTCCGCGAACAGCAGCATCAACATCCTGATTAAAGAGTTTTTCAGCCTCAT  |       |       |       |       |       |       |       |
|                                          |         | -----                                                                                              |       |       |       |       |       |       |       |
|                                          |         | Section 697                                                                                        |       |       |       |       |       |       |       |
| T4 NC 000866.4<br>SARS-CoV-2 NC_045512.2 | (66817) | 66817                                                                                              | 66825 | 66836 | 66847 | 66858 | 66869 | 66880 | 66891 |
|                                          | (66817) | CTTTTGTAATTACACCATTGCAATTACGCCCAATAGCTTTATCTAATTCAGATTTAGCAGCATTAAGTGATGGACTTTTTGTAAGCAAATGACCGA   |       |       |       |       |       |       |       |
|                                          |         | -----                                                                                              |       |       |       |       |       |       |       |
|                                          |         | Section 698                                                                                        |       |       |       |       |       |       |       |
| T4 NC 000866.4<br>SARS-CoV-2 NC_045512.2 | (66913) | 66913                                                                                              | 66924 | 66935 | 66946 | 66957 | 66968 | 66979 | 66990 |
|                                          | (66913) | TGCCAAATAGTGTAATAGCCTTCTGTGTCTTTATAGATTTTAAGTCTAAGACGTTTCATCTATACGTAACATTTCAAATATATTCATAATACCTCCTA |       |       |       |       |       |       |       |
|                                          |         | -----                                                                                              |       |       |       |       |       |       |       |
|                                          |         | Section 699                                                                                        |       |       |       |       |       |       |       |
| T4 NC 000866.4<br>SARS-CoV-2 NC_045512.2 | (67009) | 67009                                                                                              | 67023 | 67034 | 67045 | 67056 | 67067 | 67078 | 67089 |
|                                          | (67009) | AGTATTTATAGAAGGTATTTATAAAATTAAAAGAGGTTGTTTCATTATTTCGGTAAAGTGAAGGACCCATCACATATTGCCACTGAGTACGAGGAATA |       |       |       |       |       |       |       |
|                                          |         | -----                                                                                              |       |       |       |       |       |       |       |
|                                          |         | Section 700                                                                                        |       |       |       |       |       |       |       |
| T4 NC 000866.4<br>SARS-CoV-2 NC_045512.2 | (67105) | 67105                                                                                              | 67111 | 67122 | 67133 | 67144 | 67155 | 67166 | 67177 |
|                                          | (67105) | AGAGCAAAAGCGTCCATCTCTGGAATCATAACGCCATCTTTATTTTCAAATAAGACTCGCAACGGCAATTTCTGAACATCTCATGCTCTACTGGA    |       |       |       |       |       |       |       |
|                                          |         | -----                                                                                              |       |       |       |       |       |       |       |

## SARS-CoV-2 &amp; T4.apr

|                                          |         |                                                                                                    |       |       |       |       |       |       |       |
|------------------------------------------|---------|----------------------------------------------------------------------------------------------------|-------|-------|-------|-------|-------|-------|-------|
|                                          |         | Section 701                                                                                        |       |       |       |       |       |       |       |
| T4 NC 000866.4<br>SARS-CoV-2 NC_045512.2 | (67201) | 67201                                                                                              | 67210 | 67221 | 67232 | 67243 | 67254 | 67265 | 67276 |
|                                          | (67201) | ATCGTGTAATAAAATAACTGTAGGTCTTTATTACTAGAAATATTTAAATACACCTAGGTCTTCTAGAAGGTCTGGATTATAATTGCTAAACCAGTC   |       |       |       |       |       |       |       |
|                                          |         | Section 702                                                                                        |       |       |       |       |       |       |       |
| T4 NC 000866.4<br>SARS-CoV-2 NC_045512.2 | (67297) | 67297                                                                                              | 67309 | 67320 | 67331 | 67342 | 67353 | 67364 | 67375 |
|                                          | (67297) | TCTTCTAAACATTCTCTTCGTGCTGCATCTAATGCGCTTAAATCAGAATTTTCTACACGGCCCTTTGGAATATCCCAACGATGTGCCATCATTCCA   |       |       |       |       |       |       |       |
|                                          |         | Section 703                                                                                        |       |       |       |       |       |       |       |
| T4 NC 000866.4<br>SARS-CoV-2 NC_045512.2 | (67393) | 67393                                                                                              | 67408 | 67419 | 67430 | 67441 | 67452 | 67463 | 67474 |
|                                          | (67393) | GTCTTACGAGAACCAGTAACCCGACCCATAAATAAATCTTTATCTTCTGTCATAAAGATAATACCAGCTGATAATGTTTTTCATTTTAATTTCTCTGC |       |       |       |       |       |       |       |
|                                          |         | Section 704                                                                                        |       |       |       |       |       |       |       |
| T4 NC 000866.4<br>SARS-CoV-2 NC_045512.2 | (67489) | 67489                                                                                              | 67496 | 67507 | 67518 | 67529 | 67540 | 67551 | 67562 |
|                                          | (67489) | ATTCAGTGATAAAAGTTATTTAAATTTTGAGCATATTTCTTTTCATCAAAAATCTTTTGCTGTCTGCGTAACCGCCATGGCATTTCATGAACATAC   |       |       |       |       |       |       |       |
|                                          |         | Section 705                                                                                        |       |       |       |       |       |       |       |
| T4 NC 000866.4<br>SARS-CoV-2 NC_045512.2 | (67585) | 67585                                                                                              | 67595 | 67606 | 67617 | 67628 | 67639 | 67650 | 67661 |
|                                          | (67585) | GCCATATCCCTAGATAATACCGCTGCTGTAAAAATATTAACAAGTATAGTTAAAAGAATCCAATCGCCTATTCTGTCCATTGGATTTTTATAAAAA   |       |       |       |       |       |       |       |
|                                          |         | Section 706                                                                                        |       |       |       |       |       |       |       |
| T4 NC 000866.4<br>SARS-CoV-2 NC_045512.2 | (67681) | 67681                                                                                              | 67694 | 67705 | 67716 | 67727 | 67738 | 67749 | 67760 |
|                                          | (67681) | AGTAAATACGAATGATGATATAGGAAGACTAATGATATACCACAGAAGAACCTTCTTATCTGTGAACCAATCAGCATTTCGTTAACTTAGCGCGAC   |       |       |       |       |       |       |       |
|                                          |         | Section 707                                                                                        |       |       |       |       |       |       |       |
| T4 NC 000866.4<br>SARS-CoV-2 NC_045512.2 | (67777) | 67777                                                                                              | 67782 | 67793 | 67804 | 67815 | 67826 | 67837 | 67848 |
|                                          | (67777) | CATTTTGAATACACACGAATTTATCATCTGTTACAGTAAATGGCTTAGCTGCTTGATATCCCATTCTAAACTCCCTAATTAATCGTTTCTTTGTAT   |       |       |       |       |       |       |       |

## SARS-CoV-2 &amp; T4.apr

|                                          |                |                                                                                                             |       |       |       |       |       |       |       |       |       |
|------------------------------------------|----------------|-------------------------------------------------------------------------------------------------------------|-------|-------|-------|-------|-------|-------|-------|-------|-------|
|                                          |                | Section 708                                                                                                 |       |       |       |       |       |       |       |       |       |
| T4 NC 000866.4<br>SARS-CoV-2 NC_045512.2 | (67873)        | 67873                                                                                                       | 67881 | 67892 | 67903 | 67914 | 67925 | 67936 | 67947 | 67968 |       |
|                                          | (67873)<br>(1) | CTTCGGAACAACCATTCCAATCAACTCTATCAACTGGAATGCCATCATCCCCATCATCTAAATCATACCAGCGAGTTTTTAAATCATTTAATTTT<br>-----    |       |       |       |       |       |       |       |       |       |
|                                          |                | Section 709                                                                                                 |       |       |       |       |       |       |       |       |       |
| T4 NC 000866.4<br>SARS-CoV-2 NC_045512.2 | (67969)        | 67969                                                                                                       | 67980 | 67991 | 68002 | 68013 | 68024 | 68035 | 68046 | 68064 |       |
|                                          | (67969)<br>(1) | CCTGCAATCAATCACAACTCTTTCATTGATTCATTTTCAATATAAGACATGTAGCTATTATATTCTTTTAATTGTATTTTGTAATCCTTTTTTCT<br>-----    |       |       |       |       |       |       |       |       |       |
|                                          |                | Section 710                                                                                                 |       |       |       |       |       |       |       |       |       |
| T4 NC 000866.4<br>SARS-CoV-2 NC_045512.2 | (68065)        | 68065                                                                                                       | 68079 | 68090 | 68101 | 68112 | 68123 | 68134 | 68145 | 68160 |       |
|                                          | (68065)<br>(1) | TTGCCAATTTATTTTAAATATCATAATGAAATATAAAATGATACCAAAGAATGAAACAATGAAATAATTTTAGTATAACAAAGCTCGCTCCA<br>-----       |       |       |       |       |       |       |       |       |       |
|                                          |                | Section 711                                                                                                 |       |       |       |       |       |       |       |       |       |
| T4 NC 000866.4<br>SARS-CoV-2 NC_045512.2 | (68161)        | 68161                                                                                                       | 68167 | 68178 | 68189 | 68200 | 68211 | 68222 | 68233 | 68244 | 68256 |
|                                          | (68161)<br>(1) | AACTTCTATTATATCTACTGTACCACTGATTTTTAAATAAAACAGTCAATTAATAGTCCAATAAGACTACCTGTAAGAGCTGCAGCCAACGCCAC<br>-----    |       |       |       |       |       |       |       |       |       |
|                                          |                | Section 712                                                                                                 |       |       |       |       |       |       |       |       |       |
| T4 NC 000866.4<br>SARS-CoV-2 NC_045512.2 | (68257)        | 68257                                                                                                       | 68266 | 68277 | 68288 | 68299 | 68310 | 68321 | 68332 | 68352 |       |
|                                          | (68257)<br>(1) | AGCAAAAATTAAAAATGACTCAGAAAACGAATATTTGACTTTATTTAGCTTTGGCTTTTGCATCGTGATTCCTTAACAAATTTTATAATTTTATTA<br>-----   |       |       |       |       |       |       |       |       |       |
|                                          |                | Section 713                                                                                                 |       |       |       |       |       |       |       |       |       |
| T4 NC 000866.4<br>SARS-CoV-2 NC_045512.2 | (68353)        | 68353                                                                                                       | 68365 | 68376 | 68387 | 68398 | 68409 | 68420 | 68431 | 68448 |       |
|                                          | (68353)<br>(1) | AATTCATACTCAGCAAGTTTAAGCTGGTGTTCCTTTTTAATCTTTTTGCACTGGGCTTTCCAATCACGTACGCGTTTACGATAATGTCTTCCTTGA<br>-----   |       |       |       |       |       |       |       |       |       |
|                                          |                | Section 714                                                                                                 |       |       |       |       |       |       |       |       |       |
| T4 NC 000866.4<br>SARS-CoV-2 NC_045512.2 | (68449)        | 68449                                                                                                       | 68464 | 68475 | 68486 | 68497 | 68508 | 68519 | 68530 | 68544 |       |
|                                          | (68449)<br>(1) | TACCAGTATCCTATCCAATTTACGGGTACTAATAAAAAATGGAACCTACCAATGGAAGAGTTAGCATTAACATAATTATTACGCCAGAATCAATATCA<br>----- |       |       |       |       |       |       |       |       |       |

## SARS-CoV-2 &amp; T4.apr

|                                          |         |                                                                                                   |       |       |       |       |       |       |       |       |       |
|------------------------------------------|---------|---------------------------------------------------------------------------------------------------|-------|-------|-------|-------|-------|-------|-------|-------|-------|
| Section 715                              |         |                                                                                                   |       |       |       |       |       |       |       |       |       |
| T4 NC 000866.4<br>SARS-CoV-2 NC_045512.2 | (68545) | 68545                                                                                             | 68552 | 68563 | 68574 | 68585 | 68596 | 68607 | 68618 | 68629 | 68640 |
|                                          | (68545) | GTCATAACATCTAAAACACCTCCAATAATCAATAGAATTACAAATGATATAGCTATCACAGGACCTATTAATACATCAGTAGAAATTATCTGGCGC  |       |       |       |       |       |       |       |       |       |
|                                          | (1)     | -----                                                                                             |       |       |       |       |       |       |       |       |       |
| Section 716                              |         |                                                                                                   |       |       |       |       |       |       |       |       |       |
| T4 NC 000866.4<br>SARS-CoV-2 NC_045512.2 | (68641) | 68641                                                                                             | 68651 | 68662 | 68673 | 68684 | 68695 | 68706 | 68717 | 68736 |       |
|                                          | (68641) | TTTAATTCATACTTCAAAGGTTTACTTGGAAGGTATAGTGATGGCTTTGACATATTCTCTACATTCCCTTAACAAATTTTTCTAGTAATAAATCACT |       |       |       |       |       |       |       |       |       |
|                                          | (1)     | -----                                                                                             |       |       |       |       |       |       |       |       |       |
| Section 717                              |         |                                                                                                   |       |       |       |       |       |       |       |       |       |
| T4 NC 000866.4<br>SARS-CoV-2 NC_045512.2 | (68737) | 68737                                                                                             | 68750 | 68761 | 68772 | 68783 | 68794 | 68805 | 68816 | 68832 |       |
|                                          | (68737) | TTCAAAATTAGGATTTTCCACTAATTTATCAAAAAGATCATCAACAATATTCAAGATATTTCTTTTACTAAGAATACGTTTATTTTCATGCTTCGT  |       |       |       |       |       |       |       |       |       |
|                                          | (1)     | -----                                                                                             |       |       |       |       |       |       |       |       |       |
| Section 718                              |         |                                                                                                   |       |       |       |       |       |       |       |       |       |
| T4 NC 000866.4<br>SARS-CoV-2 NC_045512.2 | (68833) | 68833                                                                                             | 68838 | 68849 | 68860 | 68871 | 68882 | 68893 | 68904 | 68915 | 68928 |
|                                          | (68833) | TTCAGAATCAACTATAAGAGTAAAGAAATATTTCTTTCCCTGAAATTTTACCGTAGTATCAATATAAAATAAATTTGACTTTTGTAATTACGTTT   |       |       |       |       |       |       |       |       |       |
|                                          | (1)     | -----                                                                                             |       |       |       |       |       |       |       |       |       |
| Section 719                              |         |                                                                                                   |       |       |       |       |       |       |       |       |       |
| T4 NC 000866.4<br>SARS-CoV-2 NC_045512.2 | (68929) | 68929                                                                                             | 68937 | 68948 | 68959 | 68970 | 68981 | 68992 | 69003 | 69024 |       |
|                                          | (68929) | AAACCATGCGTCACTTAACTATAAACACCGAGATAATCAAAATCGTCGTTTAAATAACAAACTGACCATTGAGGAGAAATGAAATCAGTAAATTC   |       |       |       |       |       |       |       |       |       |
|                                          | (1)     | -----                                                                                             |       |       |       |       |       |       |       |       |       |
| Section 720                              |         |                                                                                                   |       |       |       |       |       |       |       |       |       |
| T4 NC 000866.4<br>SARS-CoV-2 NC_045512.2 | (69025) | 69025                                                                                             | 69036 | 69047 | 69058 | 69069 | 69080 | 69091 | 69102 | 69120 |       |
|                                          | (69025) | AACATCAAAATCACATGTCAATGAATGAATTGATTCAATACTGTTAATAAGTATTCCAGGACGTATTAAAGACTTTTTACCTCTGGAAAATCTTCC  |       |       |       |       |       |       |       |       |       |
|                                          | (1)     | -----                                                                                             |       |       |       |       |       |       |       |       |       |
| Section 721                              |         |                                                                                                   |       |       |       |       |       |       |       |       |       |
| T4 NC 000866.4<br>SARS-CoV-2 NC_045512.2 | (69121) | 69121                                                                                             | 69135 | 69146 | 69157 | 69168 | 69179 | 69190 | 69201 | 69216 |       |
|                                          | (69121) | AGAAAGACTTTTCATCAGTTTCATATGAAGAACCCCAATAATAATTACGTCCTTTTGCCATATGTTTAAGAGCATTTAGTAATTGGTCTGGAACATC |       |       |       |       |       |       |       |       |       |
|                                          | (1)     | -----                                                                                             |       |       |       |       |       |       |       |       |       |

## SARS-CoV-2 &amp; T4.apr

|                                          |         |                                                                                                   |       |       |       |       |       |       |       |       |       |
|------------------------------------------|---------|---------------------------------------------------------------------------------------------------|-------|-------|-------|-------|-------|-------|-------|-------|-------|
| Section 722                              |         |                                                                                                   |       |       |       |       |       |       |       |       |       |
| T4 NC 000866.4<br>SARS-CoV-2 NC_045512.2 | (69217) | 69217                                                                                             | 69223 | 69234 | 69245 | 69256 | 69267 | 69278 | 69289 | 69300 | 69312 |
|                                          | (69217) | AACGTGTCTTTGGAAC TCTTCAAACATTGAATTGAAATCACTTTGCATTTTCATTCTATTTACTCCAAGTAATAGGGGCCGAAGCCCCCTATCAT  |       |       |       |       |       |       |       |       |       |
|                                          | (1)     | -----                                                                                             |       |       |       |       |       |       |       |       |       |
| Section 723                              |         |                                                                                                   |       |       |       |       |       |       |       |       |       |
| T4 NC 000866.4<br>SARS-CoV-2 NC_045512.2 | (69313) | 69313                                                                                             | 69322 | 69333 | 69344 | 69355 | 69366 | 69377 | 69388 | 69408 |       |
|                                          | (69313) | TATTTTCAGAGAATTAATATATTCCTGAACATCGGCAGAGGTAGTTTCAACCCAGAAATATTACCATTAAAGGTTTCAACTCGAGCAAGAGTATCT  |       |       |       |       |       |       |       |       |       |
|                                          | (1)     | -----                                                                                             |       |       |       |       |       |       |       |       |       |
| Section 724                              |         |                                                                                                   |       |       |       |       |       |       |       |       |       |
| T4 NC 000866.4<br>SARS-CoV-2 NC_045512.2 | (69409) | 69409                                                                                             | 69421 | 69432 | 69443 | 69454 | 69465 | 69476 | 69487 | 69504 |       |
|                                          | (69409) | TCAATATCAACCTTAGTCAGTGCTGCAATTTCAACTACATCATCAGCAGTACTAATTCCAAGGGCATTGCTGCACGAGTTTCACGGATATATTCC   |       |       |       |       |       |       |       |       |       |
|                                          | (1)     | -----                                                                                             |       |       |       |       |       |       |       |       |       |
| Section 725                              |         |                                                                                                   |       |       |       |       |       |       |       |       |       |
| T4 NC 000866.4<br>SARS-CoV-2 NC_045512.2 | (69505) | 69505                                                                                             | 69520 | 69531 | 69542 | 69553 | 69564 | 69575 | 69586 | 69600 |       |
|                                          | (69505) | AATTTAACTGCAAGTTCTTGGCGAGCATCATCTAACTCAACTACTTTCTTGGCGATTTCAATTTCGATTTTCAGCATAACCATCAGCTTTAGTAGTC |       |       |       |       |       |       |       |       |       |
|                                          | (1)     | -----                                                                                             |       |       |       |       |       |       |       |       |       |
| Section 726                              |         |                                                                                                   |       |       |       |       |       |       |       |       |       |
| T4 NC 000866.4<br>SARS-CoV-2 NC_045512.2 | (69601) | 69601                                                                                             | 69608 | 69619 | 69630 | 69641 | 69652 | 69663 | 69674 | 69685 | 69696 |
|                                          | (69601) | AGCTGTTTCAGCTGTTTCGACGATATAGCAAGCCGAGTTTAGCATGCATTGTTACATCTTGACCTTCGGAAAGAAGCTTGCGAATTTACGCTCTTTT |       |       |       |       |       |       |       |       |       |
|                                          | (1)     | -----                                                                                             |       |       |       |       |       |       |       |       |       |
| Section 727                              |         |                                                                                                   |       |       |       |       |       |       |       |       |       |
| T4 NC 000866.4<br>SARS-CoV-2 NC_045512.2 | (69697) | 69697                                                                                             | 69707 | 69718 | 69729 | 69740 | 69751 | 69762 | 69773 | 69792 |       |
|                                          | (69697) | GATTCGGCCTGTTTATTCTTTTCAACAATAAGTTCACGAATACGTTTTTCTTCATTAATAGATTTAACAGAAGCAGTTTTTAGGTCTTTAATTTTA  |       |       |       |       |       |       |       |       |       |
|                                          | (1)     | -----                                                                                             |       |       |       |       |       |       |       |       |       |
| Section 728                              |         |                                                                                                   |       |       |       |       |       |       |       |       |       |
| T4 NC 000866.4<br>SARS-CoV-2 NC_045512.2 | (69793) | 69793                                                                                             | 69806 | 69817 | 69828 | 69839 | 69850 | 69861 | 69872 | 69888 |       |
|                                          | (69793) | TCAAGTAGTTTTGCTGCTGCAGCAGTATACTGTTCTTCAACAGATAGATTTTTAGCCATTGCAGAACCAAGTTTAGTGCGAATAAACTCAACAATT  |       |       |       |       |       |       |       |       |       |
|                                          | (1)     | -----                                                                                             |       |       |       |       |       |       |       |       |       |



## SARS-CoV-2 &amp; T4.apr

|                                          |         |                                                                                                   |       |       |       |       |       |       |       |             |       |
|------------------------------------------|---------|---------------------------------------------------------------------------------------------------|-------|-------|-------|-------|-------|-------|-------|-------------|-------|
|                                          |         |                                                                                                   |       |       |       |       |       |       |       | Section 729 |       |
| T4 NC 000866.4<br>SARS-CoV-2 NC_045512.2 | (69889) | 69889                                                                                             | 69894 | 69905 | 69916 | 69927 | 69938 | 69949 | 69960 | 69971       | 69984 |
|                                          | (69889) | TTCTTCAGTGTGTTTCATAGTATTTCTTAGGTTGGTATAATTAGATAATATAATATCACGTTTCTAATAGATTGTAACTTATTCTTCGTCTAGCT   |       |       |       |       |       |       |       |             |       |
|                                          | (1)     | -----                                                                                             |       |       |       |       |       |       |       |             |       |
|                                          |         |                                                                                                   |       |       |       |       |       |       |       | Section 730 |       |
| T4 NC 000866.4<br>SARS-CoV-2 NC_045512.2 | (69985) | 69985                                                                                             | 69993 | 70004 | 70015 | 70026 | 70037 | 70048 | 70059 | 70080       |       |
|                                          | (69985) | CGTCGATAAAGGCGTTGATGGCCTCGATAATGGCATCATTGATAGCCAATAAAATAAAATCATCGTCAGTACCTTTAGAAGATTCTAAAGCATTGA  |       |       |       |       |       |       |       |             |       |
|                                          | (1)     | -----                                                                                             |       |       |       |       |       |       |       |             |       |
|                                          |         |                                                                                                   |       |       |       |       |       |       |       | Section 731 |       |
| T4 NC 000866.4<br>SARS-CoV-2 NC_045512.2 | (70081) | 70081                                                                                             | 70092 | 70103 | 70114 | 70125 | 70136 | 70147 | 70158 | 70176       |       |
|                                          | (70081) | TATATGCTTGTTGACGAGTTCCCAAGCCTTTTTAAAATAAGGAGCTTCATCATCAGGACAAATATCCCGCACGCCTTCAAAGATACGTTTGGCAT   |       |       |       |       |       |       |       |             |       |
|                                          | (1)     | -----                                                                                             |       |       |       |       |       |       |       |             |       |
|                                          |         |                                                                                                   |       |       |       |       |       |       |       | Section 732 |       |
| T4 NC 000866.4<br>SARS-CoV-2 NC_045512.2 | (70177) | 70177                                                                                             | 70191 | 70202 | 70213 | 70224 | 70235 | 70246 | 70257 | 70272       |       |
|                                          | (70177) | AATCTAACACCCATTGTACAGGCATGTTTTGAGAACGTTTCGTTAAACTCTTTAAAGTCCTTAGATTCAAAAAGCTCTTCAGGATAATTATTTCTAT |       |       |       |       |       |       |       |             |       |
|                                          | (1)     | -----                                                                                             |       |       |       |       |       |       |       |             |       |
|                                          |         |                                                                                                   |       |       |       |       |       |       |       | Section 733 |       |
| T4 NC 000866.4<br>SARS-CoV-2 NC_045512.2 | (70273) | 70273                                                                                             | 70279 | 70290 | 70301 | 70312 | 70323 | 70334 | 70345 | 70356       | 70368 |
|                                          | (70273) | TACAAAAAGCTTTACTAAAGTTACGTTTCATAATGTTTTCTCATTTGTATAGGCTCATAATATCTCAATCATSAGCCTATGTAACTTATTTTCAT   |       |       |       |       |       |       |       |             |       |
|                                          | (1)     | -----                                                                                             |       |       |       |       |       |       |       |             |       |
|                                          |         |                                                                                                   |       |       |       |       |       |       |       | Section 734 |       |
| T4 NC 000866.4<br>SARS-CoV-2 NC_045512.2 | (70369) | 70369                                                                                             | 70378 | 70389 | 70400 | 70411 | 70422 | 70433 | 70444 | 70464       |       |
|                                          | (70369) | ATTATTGAAATATTCTTCTGCGATTTGTCGTTATCATGGTAACTTTAGAAGACAGTTTAACATAACTTTTCAGCAGTGAACATGTTAATCACAAC   |       |       |       |       |       |       |       |             |       |
|                                          | (1)     | -----                                                                                             |       |       |       |       |       |       |       |             |       |
|                                          |         |                                                                                                   |       |       |       |       |       |       |       | Section 735 |       |
| T4 NC 000866.4<br>SARS-CoV-2 NC_045512.2 | (70465) | 70465                                                                                             | 70477 | 70488 | 70499 | 70510 | 70521 | 70532 | 70543 | 70560       |       |
|                                          | (70465) | CTTTACAGTATACCACTGACCGTCTTCATTACCCATTACTGCGTAAAGTTTCAAACATCGGATGGTCAGGACCGATAACTTTAATATCATTCACCGT |       |       |       |       |       |       |       |             |       |
|                                          | (1)     | -----                                                                                             |       |       |       |       |       |       |       |             |       |

## SARS-CoV-2 &amp; T4.apr

|                                          |                |                                                                                                    |                       |                       |                       |                       |                       |                       |                       |                       |                       |
|------------------------------------------|----------------|----------------------------------------------------------------------------------------------------|-----------------------|-----------------------|-----------------------|-----------------------|-----------------------|-----------------------|-----------------------|-----------------------|-----------------------|
|                                          |                | Section 736                                                                                        |                       |                       |                       |                       |                       |                       |                       |                       |                       |
| T4 NC 000866.4<br>SARS-CoV-2 NC_045512.2 | (70561)        | <a href="#">70561</a>                                                                              | <a href="#">70576</a> | <a href="#">70587</a> | <a href="#">70598</a> | <a href="#">70609</a> | <a href="#">70620</a> | <a href="#">70631</a> | <a href="#">70642</a> | <a href="#">70656</a> |                       |
|                                          | (70561)<br>(1) | ACGACCGAAATCTTCTGAAACACATTTTCATAAAGAAGTTGAAAAGTTCACCGTAATTATCCATTTTATTCTCCAAGTTATTTCTGTATCAGTAGT   |                       |                       |                       |                       |                       |                       |                       |                       |                       |
|                                          |                | Section 737                                                                                        |                       |                       |                       |                       |                       |                       |                       |                       |                       |
| T4 NC 000866.4<br>SARS-CoV-2 NC_045512.2 | (70657)        | <a href="#">70657</a>                                                                              | <a href="#">70664</a> | <a href="#">70675</a> | <a href="#">70686</a> | <a href="#">70697</a> | <a href="#">70708</a> | <a href="#">70719</a> | <a href="#">70730</a> | <a href="#">70741</a> | <a href="#">70752</a> |
|                                          | (70657)<br>(1) | TGATAGTTGTATAGTACCATGGAAGAACAAGGATGTAAACAGTTTTGTGAAAAAATTTTAAAAAGTTTTAGGGAATTCTAGGGCGGAGAGGGGCA    |                       |                       |                       |                       |                       |                       |                       |                       |                       |
|                                          |                | Section 738                                                                                        |                       |                       |                       |                       |                       |                       |                       |                       |                       |
| T4 NC 000866.4<br>SARS-CoV-2 NC_045512.2 | (70753)        | <a href="#">70753</a>                                                                              | <a href="#">70763</a> | <a href="#">70774</a> | <a href="#">70785</a> | <a href="#">70796</a> | <a href="#">70807</a> | <a href="#">70818</a> | <a href="#">70829</a> | <a href="#">70848</a> |                       |
|                                          | (70753)<br>(1) | ATTAAAAAGATAGGATAATATATTATAAAGGGTATAAACTAAATGATGCCTAGAGAGGTCTGGAAAGGCTTAGATACCAAAAAGCCCCAACCTTTCTG |                       |                       |                       |                       |                       |                       |                       |                       |                       |
|                                          |                | Section 739                                                                                        |                       |                       |                       |                       |                       |                       |                       |                       |                       |
| T4 NC 000866.4<br>SARS-CoV-2 NC_045512.2 | (70849)        | <a href="#">70849</a>                                                                              | <a href="#">70862</a> | <a href="#">70873</a> | <a href="#">70884</a> | <a href="#">70895</a> | <a href="#">70906</a> | <a href="#">70917</a> | <a href="#">70928</a> | <a href="#">70944</a> |                       |
|                                          | (70849)<br>(1) | GTCGGGGCTAACCGTTGCGGCAACCTTGTCGGGGTTCCACCTGCCAAGGCAAGTGTTTGTACGAAACGCCGGGATTCTGAACCCGGTTATTAAGTAG  |                       |                       |                       |                       |                       |                       |                       |                       |                       |
|                                          |                | Section 740                                                                                        |                       |                       |                       |                       |                       |                       |                       |                       |                       |
| T4 NC 000866.4<br>SARS-CoV-2 NC_045512.2 | (70945)        | <a href="#">70945</a>                                                                              | <a href="#">70950</a> | <a href="#">70961</a> | <a href="#">70972</a> | <a href="#">70983</a> | <a href="#">70994</a> | <a href="#">71005</a> | <a href="#">71016</a> | <a href="#">71027</a> | <a href="#">71040</a> |
|                                          | (70945)<br>(1) | TTGACGCTACTCAATATTTTAAAAAGGCCATATCTCAACCATATCCGAACGTTCCGTCAAAAACGCTACTCGGCTTACGGCAAAGATATTTCTCTCG  |                       |                       |                       |                       |                       |                       |                       |                       |                       |
|                                          |                | Section 741                                                                                        |                       |                       |                       |                       |                       |                       |                       |                       |                       |
| T4 NC 000866.4<br>SARS-CoV-2 NC_045512.2 | (71041)        | <a href="#">71041</a>                                                                              | <a href="#">71049</a> | <a href="#">71060</a> | <a href="#">71071</a> | <a href="#">71082</a> | <a href="#">71093</a> | <a href="#">71104</a> | <a href="#">71115</a> | <a href="#">71136</a> |                       |
|                                          | (71041)<br>(1) | AATCGATAATTTGGTGCGCCGTTTCTGCTGTGATGTAAGAGGGCATCAATAAACGCAAAGATTATTAACGCAATTCCTTACTCAGGGAACCATCAG   |                       |                       |                       |                       |                       |                       |                       |                       |                       |
|                                          |                | Section 742                                                                                        |                       |                       |                       |                       |                       |                       |                       |                       |                       |
| T4 NC 000866.4<br>SARS-CoV-2 NC_045512.2 | (71137)        | <a href="#">71137</a>                                                                              | <a href="#">71148</a> | <a href="#">71159</a> | <a href="#">71170</a> | <a href="#">71181</a> | <a href="#">71192</a> | <a href="#">71203</a> | <a href="#">71214</a> | <a href="#">71232</a> |                       |
|                                          | (71137)<br>(1) | TCCGACGACTTACCGGTAGCGACCCGGTTTCTCATTTGGTATCCCGCCCTGGGATCGAACCAGGACCGCAAACCTTAGAAGGATCGTATGCTATCCA  |                       |                       |                       |                       |                       |                       |                       |                       |                       |

## SARS-CoV-2 &amp; T4.apr

|                                          |         |                                                                                                   |       |       |       |       |       |       |       |       |       |
|------------------------------------------|---------|---------------------------------------------------------------------------------------------------|-------|-------|-------|-------|-------|-------|-------|-------|-------|
|                                          |         | Section 743                                                                                       |       |       |       |       |       |       |       |       |       |
| T4 NC 000866.4<br>SARS-CoV-2 NC_045512.2 | (71233) | 71233                                                                                             | 71247 | 71258 | 71269 | 71280 | 71291 | 71302 | 71313 | 71328 |       |
|                                          | (71233) | TTACACCAGCGGGACGTAATTTAAATTTTCATTTTTTCGACCTTTAAACCATCCTTCTGGAATTGGGTCAGTTTTCTTAATACGTTTAGAACTTTT  |       |       |       |       |       |       |       |       |       |
|                                          | (1)     | -----                                                                                             |       |       |       |       |       |       |       |       |       |
|                                          |         | Section 744                                                                                       |       |       |       |       |       |       |       |       |       |
| T4 NC 000866.4<br>SARS-CoV-2 NC_045512.2 | (71329) | 71329                                                                                             | 71335 | 71346 | 71357 | 71368 | 71379 | 71390 | 71401 | 71412 | 71424 |
|                                          | (71329) | TCATCTAATGAATGAATCCACATCATACCGAATTGGGAATTCCTTTTCACCTTTCTGGTGATTATTTTTGGCGTGAGATTCTTTCATTTTATTAATA |       |       |       |       |       |       |       |       |       |
|                                          | (1)     | -----                                                                                             |       |       |       |       |       |       |       |       |       |
|                                          |         | Section 745                                                                                       |       |       |       |       |       |       |       |       |       |
| T4 NC 000866.4<br>SARS-CoV-2 NC_045512.2 | (71425) | 71425                                                                                             | 71434 | 71445 | 71456 | 71467 | 71478 | 71489 | 71500 | 71520 |       |
|                                          | (71425) | GTTTCAGGAGTATGATGCTTATTTAGAAATCTGCTATTATTTAAAAATTTTTCCCTGTATTTCAGGAGTTGACCACAAACGTTTAAATACATTTGAA |       |       |       |       |       |       |       |       |       |
|                                          | (1)     | -----                                                                                             |       |       |       |       |       |       |       |       |       |
|                                          |         | Section 746                                                                                       |       |       |       |       |       |       |       |       |       |
| T4 NC 000866.4<br>SARS-CoV-2 NC_045512.2 | (71521) | 71521                                                                                             | 71533 | 71544 | 71555 | 71566 | 71577 | 71588 | 71599 | 71616 |       |
|                                          | (71521) | CCAATTTTACGATATTTTTCTTGAAGTAAATATCATTTTCAAACGTGACTTAAACGATTTAGCTCCTTTTAAAGCTAGCATCTTCTCTCTGGTTT   |       |       |       |       |       |       |       |       |       |
|                                          | (1)     | -----                                                                                             |       |       |       |       |       |       |       |       |       |
|                                          |         | Section 747                                                                                       |       |       |       |       |       |       |       |       |       |
| T4 NC 000866.4<br>SARS-CoV-2 NC_045512.2 | (71617) | 71617                                                                                             | 71632 | 71643 | 71654 | 71665 | 71676 | 71687 | 71698 | 71712 |       |
|                                          | (71617) | AGCATTCAGGAATATTTACATGATCCCATCCACCTTCACCGCCAAGTTTTAAATTATACACATCTGGTCTATTTAAAAACTCTTCTGTGACAATA   |       |       |       |       |       |       |       |       |       |
|                                          | (1)     | -----                                                                                             |       |       |       |       |       |       |       |       |       |
|                                          |         | Section 748                                                                                       |       |       |       |       |       |       |       |       |       |
| T4 NC 000866.4<br>SARS-CoV-2 NC_045512.2 | (71713) | 71713                                                                                             | 71720 | 71731 | 71742 | 71753 | 71764 | 71775 | 71786 | 71797 | 71808 |
|                                          | (71713) | TTTTTCTCGGCTTCAAGCATAGATTCTTTATCGTCAAAATACTCTAATATTTCTTTAGAAAAATTTCTATACCATATTTATCTTGGGCTCTTTTT   |       |       |       |       |       |       |       |       |       |
|                                          | (1)     | -----                                                                                             |       |       |       |       |       |       |       |       |       |
|                                          |         | Section 749                                                                                       |       |       |       |       |       |       |       |       |       |
| T4 NC 000866.4<br>SARS-CoV-2 NC_045512.2 | (71809) | 71809                                                                                             | 71819 | 71830 | 71841 | 71852 | 71863 | 71874 | 71885 | 71904 |       |
|                                          | (71809) | AATAATTTACCAGAACCCATATATCCATCATCTAAATTTTCGGTAGAATGCACACCAATATAAATTTTATTATTAATTTTATTTGTTATTTTATAA  |       |       |       |       |       |       |       |       |       |
|                                          | (1)     | -----                                                                                             |       |       |       |       |       |       |       |       |       |

## SARS-CoV-2 &amp; T4.apr

|                                          |                |                                                                                                            |                       |                       |                       |                       |                       |                       |                       |                       |                       |
|------------------------------------------|----------------|------------------------------------------------------------------------------------------------------------|-----------------------|-----------------------|-----------------------|-----------------------|-----------------------|-----------------------|-----------------------|-----------------------|-----------------------|
|                                          |                |                                                                                                            |                       |                       |                       |                       |                       |                       |                       | Section 750           |                       |
| T4 NC 000866.4<br>SARS-CoV-2 NC_045512.2 | (71905)        | <a href="#">71905</a>                                                                                      | <a href="#">71918</a> | <a href="#">71929</a> | <a href="#">71940</a> | <a href="#">71951</a> | <a href="#">71962</a> | <a href="#">71973</a> | <a href="#">71984</a> | <a href="#">72000</a> |                       |
|                                          | (71905)<br>(1) | GTGTAATAGAACATAAATATCTCCTATTTCTAAGAGTATTTATGTTCTCAAAATATGACCCAGACCAGATTTGAACTGGTAACCTTTCCCTTATGA<br>-----  |                       |                       |                       |                       |                       |                       |                       |                       |                       |
|                                          |                |                                                                                                            |                       |                       |                       |                       |                       |                       |                       | Section 751           |                       |
| T4 NC 000866.4<br>SARS-CoV-2 NC_045512.2 | (72001)        | <a href="#">72001</a>                                                                                      | <a href="#">72006</a> | <a href="#">72017</a> | <a href="#">72028</a> | <a href="#">72039</a> | <a href="#">72050</a> | <a href="#">72061</a> | <a href="#">72072</a> | <a href="#">72083</a> | <a href="#">72096</a> |
|                                          | (72001)<br>(1) | GGGGACTGCTGCTAACCATTGAGCTACAGGGCCTTGGTGCTGATTGACGGAATCGAACCGCCGACATCCTCATTACAAGTGAGGTGCTCTACCTAC<br>-----  |                       |                       |                       |                       |                       |                       |                       |                       |                       |
|                                          |                |                                                                                                            |                       |                       |                       |                       |                       |                       |                       | Section 752           |                       |
| T4 NC 000866.4<br>SARS-CoV-2 NC_045512.2 | (72097)        | <a href="#">72097</a>                                                                                      | <a href="#">72105</a> | <a href="#">72116</a> | <a href="#">72127</a> | <a href="#">72138</a> | <a href="#">72149</a> | <a href="#">72160</a> | <a href="#">72171</a> | <a href="#">72192</a> |                       |
|                                          | (72097)<br>(1) | TGAGCTAAATCAGCAAAATTACGGAGGCGATAGGATTTGAACCTATGAGTCGCCGGAGCGACTGCCGGTTTTCAAGACCGGTGCATTAAACCACTC<br>-----  |                       |                       |                       |                       |                       |                       |                       |                       |                       |
|                                          |                |                                                                                                            |                       |                       |                       |                       |                       |                       |                       | Section 753           |                       |
| T4 NC 000866.4<br>SARS-CoV-2 NC_045512.2 | (72193)        | <a href="#">72193</a>                                                                                      | <a href="#">72204</a> | <a href="#">72215</a> | <a href="#">72226</a> | <a href="#">72237</a> | <a href="#">72248</a> | <a href="#">72259</a> | <a href="#">72270</a> | <a href="#">72288</a> |                       |
|                                          | (72193)<br>(1) | TGCCACGCCTCCAGTCTCCATACAAGGATTTGAACCTTGGACCTCCTGATCCCAAATCAGGCGCTCTACCAAACCTGAGCTACACGGAGTAAATTAA<br>----- |                       |                       |                       |                       |                       |                       |                       |                       |                       |
|                                          |                |                                                                                                            |                       |                       |                       |                       |                       |                       |                       | Section 754           |                       |
| T4 NC 000866.4<br>SARS-CoV-2 NC_045512.2 | (72289)        | <a href="#">72289</a>                                                                                      | <a href="#">72303</a> | <a href="#">72314</a> | <a href="#">72325</a> | <a href="#">72336</a> | <a href="#">72347</a> | <a href="#">72358</a> | <a href="#">72369</a> | <a href="#">72384</a> |                       |
|                                          | (72289)<br>(1) | ATTGGAGCGGATAATGAGAATCGAACTCACATCATCAGATTGGAAGTCTGAGGTAATACCATTATACGATATCCGCAAATTTGGTGCGAGAAGTGG<br>-----  |                       |                       |                       |                       |                       |                       |                       |                       |                       |
|                                          |                |                                                                                                            |                       |                       |                       |                       |                       |                       |                       | Section 755           |                       |
| T4 NC 000866.4<br>SARS-CoV-2 NC_045512.2 | (72385)        | <a href="#">72385</a>                                                                                      | <a href="#">72391</a> | <a href="#">72402</a> | <a href="#">72413</a> | <a href="#">72424</a> | <a href="#">72435</a> | <a href="#">72446</a> | <a href="#">72457</a> | <a href="#">72468</a> | <a href="#">72480</a> |
|                                          | (72385)<br>(1) | GACTCGAACCCACAAGGAAATCATTCGCGAGCATTTTAAGTGCTGTGCCTTTACCAATTTGACCATTCTCGCGCTGGGAATAAAGGACTCGAACCT<br>-----  |                       |                       |                       |                       |                       |                       |                       |                       |                       |
|                                          |                |                                                                                                            |                       |                       |                       |                       |                       |                       |                       | Section 756           |                       |
| T4 NC 000866.4<br>SARS-CoV-2 NC_045512.2 | (72481)        | <a href="#">72481</a>                                                                                      | <a href="#">72490</a> | <a href="#">72501</a> | <a href="#">72512</a> | <a href="#">72523</a> | <a href="#">72534</a> | <a href="#">72545</a> | <a href="#">72556</a> | <a href="#">72576</a> |                       |
|                                          | (72481)<br>(1) | TTGCATCTAGCAGTCAAAGTGCTATGCCTTACCAACTTGGCTAATTCCCAATTATTAACAAAGGCTCTCTAACAAGAACCCTTGATGATAGAGGGT<br>-----  |                       |                       |                       |                       |                       |                       |                       |                       |                       |

## SARS-CoV-2 &amp; T4.apr

|                                          |         |                                                                                                    |       |       |       |       |       |       |       |       |       |
|------------------------------------------|---------|----------------------------------------------------------------------------------------------------|-------|-------|-------|-------|-------|-------|-------|-------|-------|
|                                          |         | Section 757                                                                                        |       |       |       |       |       |       |       |       |       |
| T4 NC 000866.4<br>SARS-CoV-2 NC_045512.2 | (72577) | 72577                                                                                              | 72589 | 72600 | 72611 | 72622 | 72633 | 72644 | 72655 | 72672 |       |
|                                          | (72577) | ATTAATCAGTGC GG TATGAGTTAATAATAACAAATAATTCTTAAAGCATATTTACCATTTATGATGATACGTATTTACGATACATTCAAGACCCAA |       |       |       |       |       |       |       |       |       |
|                                          | (1)     | -----                                                                                              |       |       |       |       |       |       |       |       |       |
|                                          |         | Section 758                                                                                        |       |       |       |       |       |       |       |       |       |
| T4 NC 000866.4<br>SARS-CoV-2 NC_045512.2 | (72673) | 72673                                                                                              | 72688 | 72699 | 72710 | 72721 | 72732 | 72743 | 72754 | 72768 |       |
|                                          | (72673) | AGGATTCTTGAAAAATATCATATTCAAGAGGACCTTTTTCTGTTTCAATAAAGAAATCAAATTTACTGTATTAAATTTACGGTCTTCCTTTACTAA   |       |       |       |       |       |       |       |       |       |
|                                          | (1)     | -----                                                                                              |       |       |       |       |       |       |       |       |       |
|                                          |         | Section 759                                                                                        |       |       |       |       |       |       |       |       |       |
| T4 NC 000866.4<br>SARS-CoV-2 NC_045512.2 | (72769) | 72769                                                                                              | 72776 | 72787 | 72798 | 72809 | 72820 | 72831 | 72842 | 72853 | 72864 |
|                                          | (72769) | TTTAACCTTGAGAAAGATGAACGATCAATGTAAACCTTTTCAACTTCAAAACACGTTAAATGCCATAATCATCAATCAAGGCTTTAGCTGCTTCTTG  |       |       |       |       |       |       |       |       |       |
|                                          | (1)     | -----                                                                                              |       |       |       |       |       |       |       |       |       |
|                                          |         | Section 760                                                                                        |       |       |       |       |       |       |       |       |       |
| T4 NC 000866.4<br>SARS-CoV-2 NC_045512.2 | (72865) | 72865                                                                                              | 72875 | 72886 | 72897 | 72908 | 72919 | 72930 | 72941 | 72960 |       |
|                                          | (72865) | ATCATATTTATATCCATTTTCAACGGATGATACTTTTCGCATAAAGAATCATCATCAACCTCTATCAACAATAGCATGAGTATGGGCATTTACGATT  |       |       |       |       |       |       |       |       |       |
|                                          | (1)     | -----                                                                                              |       |       |       |       |       |       |       |       |       |
|                                          |         | Section 761                                                                                        |       |       |       |       |       |       |       |       |       |
| T4 NC 000866.4<br>SARS-CoV-2 NC_045512.2 | (72961) | 72961                                                                                              | 72974 | 72985 | 72996 | 73007 | 73018 | 73029 | 73040 | 73056 |       |
|                                          | (72961) | TGCCACCAGTCGAAACGATTGGAACCATAATCTGGTTTATTTTCATTTTCTTTAATGATATCACGCAGTTTATCTTCTGTTTCAGCATACGCAATT   |       |       |       |       |       |       |       |       |       |
|                                          | (1)     | -----                                                                                              |       |       |       |       |       |       |       |       |       |
|                                          |         | Section 762                                                                                        |       |       |       |       |       |       |       |       |       |
| T4 NC 000866.4<br>SARS-CoV-2 NC_045512.2 | (73057) | 73057                                                                                              | 73062 | 73073 | 73084 | 73095 | 73106 | 73117 | 73128 | 73139 | 73152 |
|                                          | (73057) | AAATCATCATATCCACCACAAGGATAATAATTATCACCTGCGAATAAAAGAAAATTTACCTTAGATGGATTTACGTAATAATGGTCTTTAGGATAT   |       |       |       |       |       |       |       |       |       |
|                                          | (1)     | -----                                                                                              |       |       |       |       |       |       |       |       |       |
|                                          |         | Section 763                                                                                        |       |       |       |       |       |       |       |       |       |
| T4 NC 000866.4<br>SARS-CoV-2 NC_045512.2 | (73153) | 73153                                                                                              | 73161 | 73172 | 73183 | 73194 | 73205 | 73216 | 73227 | 73248 |       |
|                                          | (73153) | TTAGTTCCTCTCCAATCAGTTACTTCAACATAACGGTAAGAAAATCCATTTTACTTTCAATCCAACCTCCACGCTTCAAAGGAGTATTAAAACT     |       |       |       |       |       |       |       |       |       |
|                                          | (1)     | -----                                                                                              |       |       |       |       |       |       |       |       |       |

## SARS-CoV-2 &amp; T4.apr

|                                          |         |                                                                                                    |       |       |       |       |       |       |       |
|------------------------------------------|---------|----------------------------------------------------------------------------------------------------|-------|-------|-------|-------|-------|-------|-------|
|                                          |         | Section 764                                                                                        |       |       |       |       |       |       |       |
| T4 NC 000866.4<br>SARS-CoV-2 NC_045512.2 | (73249) | 73249                                                                                              | 73260 | 73271 | 73282 | 73293 | 73304 | 73315 | 73326 |
|                                          | (73249) | TTATCAGGTATTAAATTACCTTCAAAATGAGAAGGATTTGCATAATCCCCGGCATAAACATAATATTCGTTAATACTCATTTATTCACCTTTAGAA   |       |       |       |       |       |       |       |
|                                          |         | Section 765                                                                                        |       |       |       |       |       |       |       |
| T4 NC 000866.4<br>SARS-CoV-2 NC_045512.2 | (73345) | 73345                                                                                              | 73359 | 73370 | 73381 | 73392 | 73403 | 73414 | 73425 |
|                                          | (73345) | ATTTTATCCATAACGATAGCAATTAAACCAATTAAAAATGCTACTACAAGTGAAAACACATTTTCTGCTGTAGTTAATAATCCGCATATAAATCCA   |       |       |       |       |       |       |       |
|                                          |         | Section 766                                                                                        |       |       |       |       |       |       |       |
| T4 NC 000866.4<br>SARS-CoV-2 NC_045512.2 | (73441) | 73441                                                                                              | 73447 | 73458 | 73469 | 73480 | 73491 | 73502 | 73513 |
|                                          | (73441) | ACAAACATTGAAAACTAAAAGCAGAAGCAGAAATTGCAATAGCAACATTTGCAATTAATTCACAGCGTTTCATTTTATTCTCCTCAGTAGTTGAT    |       |       |       |       |       |       |       |
|                                          |         | Section 767                                                                                        |       |       |       |       |       |       |       |
| T4 NC 000866.4<br>SARS-CoV-2 NC_045512.2 | (73537) | 73537                                                                                              | 73546 | 73557 | 73568 | 73579 | 73590 | 73601 | 73612 |
|                                          | (73537) | AGGGTAATAGTATCACAGCTAAAACCCCTATGTAAACAACCTTTGTGAAATATTTATTACAAAAGATTTTTAGCAATAATCTTGAGATGTGCCGCAGA |       |       |       |       |       |       |       |
|                                          |         | Section 768                                                                                        |       |       |       |       |       |       |       |
| T4 NC 000866.4<br>SARS-CoV-2 NC_045512.2 | (73633) | 73633                                                                                              | 73645 | 73656 | 73667 | 73678 | 73689 | 73700 | 73711 |
|                                          | (73633) | AATGTGTTTAGCTTTAAACAACGCAGTTTCTTCAGCAGGAGAGATAACGATTGTAGCACCATCCTTTTTAGCAGACCACCCATCACCTAGGTAAAC   |       |       |       |       |       |       |       |
|                                          |         | Section 769                                                                                        |       |       |       |       |       |       |       |
| T4 NC 000866.4<br>SARS-CoV-2 NC_045512.2 | (73729) | 73729                                                                                              | 73744 | 73755 | 73766 | 73777 | 73788 | 73799 | 73810 |
|                                          | (73729) | AGTACCTTTGATTTCTTCGCCATCAACCAGACTAATCATTGGTTTACCTTCTCGTCCTTTATTTGCTTTAATAACTTCAGAAGTAAGAGTAGCTTC   |       |       |       |       |       |       |       |
|                                          |         | Section 770                                                                                        |       |       |       |       |       |       |       |
| T4 NC 000866.4<br>SARS-CoV-2 NC_045512.2 | (73825) | 73825                                                                                              | 73832 | 73843 | 73854 | 73865 | 73876 | 73887 | 73898 |
|                                          | (73825) | GGTAATGGTAGAAACCGGGGTAGTTGTAGAAGTAAATCTTTAAATGTTTTCATTTTTATTTTCTTAATTAATTTTGATGAGGTAATAGTATCACT    |       |       |       |       |       |       |       |

## SARS-CoV-2 &amp; T4.apr

|                                          |         |                                                                                                    |       |       |       |       |       |       |       |       |       |
|------------------------------------------|---------|----------------------------------------------------------------------------------------------------|-------|-------|-------|-------|-------|-------|-------|-------|-------|
|                                          |         | Section 771                                                                                        |       |       |       |       |       |       |       |       |       |
| T4 NC 000866.4<br>SARS-CoV-2 NC_045512.2 | (73921) | 73921                                                                                              | 73931 | 73942 | 73953 | 73964 | 73975 | 73986 | 73997 | 74016 |       |
|                                          | (73921) | ACCTCATCAGTATGTAAACAACCTTTGTGAAATTATTTTAAATCATCTGCCCAATCGAGTTTAAGAGGCTCTTTGTATTTCACGATCTAATACGACCG |       |       |       |       |       |       |       |       |       |
|                                          | (1)     | -----                                                                                              |       |       |       |       |       |       |       |       |       |
|                                          |         | Section 772                                                                                        |       |       |       |       |       |       |       |       |       |
| T4 NC 000866.4<br>SARS-CoV-2 NC_045512.2 | (74017) | 74017                                                                                              | 74030 | 74041 | 74052 | 74063 | 74074 | 74085 | 74096 | 74112 |       |
|                                          | (74017) | GAATTTGTACATCACCGCTAAATGATAAGGGCCCAACATTATAAGACAATGTTATATGCGGTGTGTAATCATCAAATCATGTGTAGCACCTAGTG    |       |       |       |       |       |       |       |       |       |
|                                          | (1)     | -----                                                                                              |       |       |       |       |       |       |       |       |       |
|                                          |         | Section 773                                                                                        |       |       |       |       |       |       |       |       |       |
| T4 NC 000866.4<br>SARS-CoV-2 NC_045512.2 | (74113) | 74113                                                                                              | 74118 | 74129 | 74140 | 74151 | 74162 | 74173 | 74184 | 74195 | 74208 |
|                                          | (74113) | CCCGCGCATACATGTGTGACAGCGCAGATATTCAGAATCTAGCACAAAGTACAAGAGTCGATCCATCTTGTGTTTTCCATACTTCTAAATGTCCAG   |       |       |       |       |       |       |       |       |       |
|                                          | (1)     | -----                                                                                              |       |       |       |       |       |       |       |       |       |
|                                          |         | Section 774                                                                                        |       |       |       |       |       |       |       |       |       |
| T4 NC 000866.4<br>SARS-CoV-2 NC_045512.2 | (74209) | 74209                                                                                              | 74217 | 74228 | 74239 | 74250 | 74261 | 74272 | 74283 | 74304 |       |
|                                          | (74209) | AAGAAGCTACTTCAAACTTCCACTCGATGGAACATATGGAACATTTACTCTTGAATAACATATAGTCGAATGAATTTTTTCTCTAGGAACCTGGAT   |       |       |       |       |       |       |       |       |       |
|                                          | (1)     | -----                                                                                              |       |       |       |       |       |       |       |       |       |
|                                          |         | Section 775                                                                                        |       |       |       |       |       |       |       |       |       |
| T4 NC 000866.4<br>SARS-CoV-2 NC_045512.2 | (74305) | 74305                                                                                              | 74316 | 74327 | 74338 | 74349 | 74360 | 74371 | 74382 | 74400 |       |
|                                          | (74305) | TAGGAACACGTAAAGAGCGCTGAAGTTCTTCCAGCGCATCAAGTGTTAATTCTGAAAACCTTAGCTGCTACATAAAGACCCGTTGAAAAGTCTTTAA  |       |       |       |       |       |       |       |       |       |
|                                          | (1)     | -----                                                                                              |       |       |       |       |       |       |       |       |       |
|                                          |         | Section 776                                                                                        |       |       |       |       |       |       |       |       |       |
| T4 NC 000866.4<br>SARS-CoV-2 NC_045512.2 | (74401) | 74401                                                                                              | 74415 | 74426 | 74437 | 74448 | 74459 | 74470 | 74481 | 74496 |       |
|                                          | (74401) | ATTCCATCATTTCTTCATCTTTTGCTTCATCTGCAGATTCAGCAGTAAGATTTTTGACAGCTTCAACGATTTCTTCAACTTTGATAGTATCGCCAGT  |       |       |       |       |       |       |       |       |       |
|                                          | (1)     | -----                                                                                              |       |       |       |       |       |       |       |       |       |
|                                          |         | Section 777                                                                                        |       |       |       |       |       |       |       |       |       |
| T4 NC 000866.4<br>SARS-CoV-2 NC_045512.2 | (74497) | 74497                                                                                              | 74503 | 74514 | 74525 | 74536 | 74547 | 74558 | 74569 | 74580 | 74592 |
|                                          | (74497) | GATACCTACTGCACGAGCAATTTTCAGCCAAAGTTCCTTGCAGAATTTTGGATTCTTCCATCAGACGAGCAGCTTGATCCTGCGTATCAAGAATGCG  |       |       |       |       |       |       |       |       |       |
|                                          | (1)     | -----                                                                                              |       |       |       |       |       |       |       |       |       |

## SARS-CoV-2 &amp; T4.apr

|                                          |         |                                                                                                   |       |       |       |       |       |       |       |
|------------------------------------------|---------|---------------------------------------------------------------------------------------------------|-------|-------|-------|-------|-------|-------|-------|
|                                          |         | Section 778                                                                                       |       |       |       |       |       |       |       |
| T4 NC 000866.4<br>SARS-CoV-2 NC_045512.2 | (74593) | 74593                                                                                             | 74602 | 74613 | 74624 | 74635 | 74646 | 74657 | 74668 |
|                                          | (74593) | AGATTTTCAGAGTTACGATTTTCAGCAGACAGTTTTTGTTC AACAGTTTGTTCAGACATTATAGTACCTTTAGTGTATTTTAATTTTAGAAAAAGT |       |       |       |       |       |       |       |
|                                          |         | Section 779                                                                                       |       |       |       |       |       |       |       |
| T4 NC 000866.4<br>SARS-CoV-2 NC_045512.2 | (74689) | 74689                                                                                             | 74701 | 74712 | 74723 | 74734 | 74745 | 74756 | 74767 |
|                                          | (74689) | TCTTCAAGAGAACCATCGTTTGTAATTACTAAATCGCCATCAGCAATTGGCAATCCAGCTTCTGTAATATGTGTATCATTGGATTTTTGACCAGGA  |       |       |       |       |       |       |       |
|                                          |         | Section 780                                                                                       |       |       |       |       |       |       |       |
| T4 NC 000866.4<br>SARS-CoV-2 NC_045512.2 | (74785) | 74785                                                                                             | 74800 | 74811 | 74822 | 74833 | 74844 | 74855 | 74866 |
|                                          | (74785) | CGAACTACATGAATTACTGTAGCACCCATCGCCCTAGCCGCATCCATTTTCATGATCTTGACGGGTATCAGGAACGATATAATAATCATAACCTGAG |       |       |       |       |       |       |       |
|                                          |         | Section 781                                                                                       |       |       |       |       |       |       |       |
| T4 NC 000866.4<br>SARS-CoV-2 NC_045512.2 | (74881) | 74881                                                                                             | 74888 | 74899 | 74910 | 74921 | 74932 | 74943 | 74954 |
|                                          | (74881) | TTAAATTTATCAAGATAATCTAAAGCAAATAATTTTACCCAGTACATGCGGTGCAAGTTATTAACAATCAAATCCGTACCTAGGGCTTGCATCAGA  |       |       |       |       |       |       |       |
|                                          |         | Section 782                                                                                       |       |       |       |       |       |       |       |
| T4 NC 000866.4<br>SARS-CoV-2 NC_045512.2 | (74977) | 74977                                                                                             | 74987 | 74998 | 75009 | 75020 | 75031 | 75042 | 75053 |
|                                          | (74977) | CGACGGACTGACCATTGATCTTCAATATTATTTATAACGTCAGTAATCTTATTAAATGCTACGAAATTAAGTATTCTTTTCCTTCGTCATCAAAA   |       |       |       |       |       |       |       |
|                                          |         | Section 783                                                                                       |       |       |       |       |       |       |       |
| T4 NC 000866.4<br>SARS-CoV-2 NC_045512.2 | (75073) | 75073                                                                                             | 75086 | 75097 | 75108 | 75119 | 75130 | 75141 | 75152 |
|                                          | (75073) | ACAAACACACCTTTAATTGGGCTTTTACCATTAAAGATAACAAAATGCTTGTTCCATAATCGTGATTACTTCTAATTTAGTCAGATTTAAATTAGTC |       |       |       |       |       |       |       |
|                                          |         | Section 784                                                                                       |       |       |       |       |       |       |       |
| T4 NC 000866.4<br>SARS-CoV-2 NC_045512.2 | (75169) | 75169                                                                                             | 75174 | 75185 | 75196 | 75207 | 75218 | 75229 | 75240 |
|                                          | (75169) | TCACGATCATAGTCAATTCTTCAAACTCTTTACGAGTTAAGCAAGGATAGTCAGTGTTTGCTGCAAATACTCCCCATGCATAAGCCAATGCATCC   |       |       |       |       |       |       |       |



## SARS-CoV-2 &amp; T4.apr

|                                          |         |                                                                                                    |       |       |       |       |       |       |       |
|------------------------------------------|---------|----------------------------------------------------------------------------------------------------|-------|-------|-------|-------|-------|-------|-------|
|                                          |         | Section 785                                                                                        |       |       |       |       |       |       |       |
| T4 NC 000866.4<br>SARS-CoV-2 NC_045512.2 | (75265) | 75265                                                                                              | 75273 | 75284 | 75295 | 75306 | 75317 | 75328 | 75339 |
|                                          | (75265) | TTAATAGGACCAGCAAGTTGGTATTTAACTGCAGAATAATTGCTCATGATAAAATCAGCAGTAGTATCTTTTCCACTACGCTTTACACCGCTTAAA   |       |       |       |       |       |       |       |
|                                          |         | Section 786                                                                                        |       |       |       |       |       |       |       |
| T4 NC 000866.4<br>SARS-CoV-2 NC_045512.2 | (75361) | 75361                                                                                              | 75372 | 75383 | 75394 | 75405 | 75416 | 75427 | 75438 |
|                                          | (75361) | AAGATTAGTTTCATGTGTTTCTCCTCAAATTTAATTAAGATTATAACACACAAAACCTGAAGCATTAAACTTCTGCTATAATTTTACCATCTTTTTT  |       |       |       |       |       |       |       |
|                                          |         | Section 787                                                                                        |       |       |       |       |       |       |       |
| T4 NC 000866.4<br>SARS-CoV-2 NC_045512.2 | (75457) | 75457                                                                                              | 75471 | 75482 | 75493 | 75504 | 75515 | 75526 | 75537 |
|                                          | (75457) | TACTTGAAAAATAGGTGTAAGGAATTGTTGCAGTACATACTAAAGCCGGGTCTGAATCTTCCGTGTAGCTAAATTCTACTTCAGATAGGTCAGAAAC  |       |       |       |       |       |       |       |
|                                          |         | Section 788                                                                                        |       |       |       |       |       |       |       |
| T4 NC 000866.4<br>SARS-CoV-2 NC_045512.2 | (75553) | 75553                                                                                              | 75559 | 75570 | 75581 | 75592 | 75603 | 75614 | 75625 |
|                                          | (75553) | CCAAGGCTTATAAAAAATTTATTGACATCACGATTTTCAGTTTTGCTATTATCTAAGATGTAAAGCGTAATGTACTCAGGACCTGTTTTTTGGGCAGT |       |       |       |       |       |       |       |
|                                          |         | Section 789                                                                                        |       |       |       |       |       |       |       |
| T4 NC 000866.4<br>SARS-CoV-2 NC_045512.2 | (75649) | 75649                                                                                              | 75658 | 75669 | 75680 | 75691 | 75702 | 75713 | 75724 |
|                                          | (75649) | ATTTTCACCTGTAAGATAGTTGCTAGTTCCTAGCATCCATTCATACATTCCTATCCACGACTTAAGTTCTTCATCAACTATAAATCTCACAAATGAG  |       |       |       |       |       |       |       |
|                                          |         | Section 790                                                                                        |       |       |       |       |       |       |       |
| T4 NC 000866.4<br>SARS-CoV-2 NC_045512.2 | (75745) | 75745                                                                                              | 75757 | 75768 | 75779 | 75790 | 75801 | 75812 | 75823 |
|                                          | (75745) | TGGATCATACTCAAATGTAACACCTGGACGTTGTGCTCGGCCAGTCCAAACGGCCAGTCACGGTATCAGTAACAGGTATTCTAATTCCCTGGAAT    |       |       |       |       |       |       |       |
|                                          |         | Section 791                                                                                        |       |       |       |       |       |       |       |
| T4 NC 000866.4<br>SARS-CoV-2 NC_045512.2 | (75841) | 75841                                                                                              | 75856 | 75867 | 75878 | 75889 | 75900 | 75911 | 75922 |
|                                          | (75841) | AGGAACTGACTGAGCATTTAAAGTAAAGCAGATGTAGTATTACTATGTGGTATTGATACTACAAAGTTAGTTGTATTTGCTTGTTAAAAATTTG     |       |       |       |       |       |       |       |

## SARS-CoV-2 &amp; T4.apr

|                                          |         |                                                                                                   |       |       |       |       |       |       |       |       |       |
|------------------------------------------|---------|---------------------------------------------------------------------------------------------------|-------|-------|-------|-------|-------|-------|-------|-------|-------|
| Section 792                              |         |                                                                                                   |       |       |       |       |       |       |       |       |       |
| T4 NC 000866.4<br>SARS-CoV-2 NC_045512.2 | (75937) | 75937                                                                                             | 75944 | 75955 | 75966 | 75977 | 75988 | 75999 | 76010 | 76021 | 76032 |
|                                          | (75937) | TTGCAGAGCTTGCGACATATATTCCTCATAATGCTTTATAACTGTTGGTGGTATAATGGGTCTAAGTCCCTTCCATTCAATTCCATTTAGAACAAA  |       |       |       |       |       |       |       |       |       |
|                                          | (1)     | -----                                                                                             |       |       |       |       |       |       |       |       |       |
| Section 793                              |         |                                                                                                   |       |       |       |       |       |       |       |       |       |
| T4 NC 000866.4<br>SARS-CoV-2 NC_045512.2 | (76033) | 76033                                                                                             | 76043 | 76054 | 76065 | 76076 | 76087 | 76098 | 76109 | 76128 |       |
|                                          | (76033) | CAACAGAAAAGAATGGAAGATAATAGAAATTAGATATTTGACCAGACTTTGTTTGCAGAGAAACGTTTTCTTTTGAACGAACTGCTGAAGTGGCA   |       |       |       |       |       |       |       |       |       |
|                                          | (1)     | -----                                                                                             |       |       |       |       |       |       |       |       |       |
| Section 794                              |         |                                                                                                   |       |       |       |       |       |       |       |       |       |
| T4 NC 000866.4<br>SARS-CoV-2 NC_045512.2 | (76129) | 76129                                                                                             | 76142 | 76153 | 76164 | 76175 | 76186 | 76197 | 76208 | 76224 |       |
|                                          | (76129) | TCAACACAACGTTTCGCCAGTCTTTCGGGGCGATTTCAACAAGGCTACCCATAATATTACCAGGTATATATGCCTTAATCATTGGTCTGCACCCC   |       |       |       |       |       |       |       |       |       |
|                                          | (1)     | -----                                                                                             |       |       |       |       |       |       |       |       |       |
| Section 795                              |         |                                                                                                   |       |       |       |       |       |       |       |       |       |
| T4 NC 000866.4<br>SARS-CoV-2 NC_045512.2 | (76225) | 76225                                                                                             | 76230 | 76241 | 76252 | 76263 | 76274 | 76285 | 76296 | 76307 | 76320 |
|                                          | (76225) | TAAATCCTTTCACTTGACTCCAATCAATTTTTAATTTGTTTTATTAGTAATAGTAGGTGTATTTGCATATTGCTTTAAAAGCTCTTCTAGGAATT   |       |       |       |       |       |       |       |       |       |
|                                          | (1)     | -----                                                                                             |       |       |       |       |       |       |       |       |       |
| Section 796                              |         |                                                                                                   |       |       |       |       |       |       |       |       |       |
| T4 NC 000866.4<br>SARS-CoV-2 NC_045512.2 | (76321) | 76321                                                                                             | 76329 | 76340 | 76351 | 76362 | 76373 | 76384 | 76395 | 76416 |       |
|                                          | (76321) | GCTGACGAGCTTTAGGTGGAATATAGTGCAAGTTTAATCCGTACATTAAATTATGCTTACCTAAACCAAGGTAAATTATCAAAGGAAATTTATCCC  |       |       |       |       |       |       |       |       |       |
|                                          | (1)     | -----                                                                                             |       |       |       |       |       |       |       |       |       |
| Section 797                              |         |                                                                                                   |       |       |       |       |       |       |       |       |       |
| T4 NC 000866.4<br>SARS-CoV-2 NC_045512.2 | (76417) | 76417                                                                                             | 76428 | 76439 | 76450 | 76461 | 76472 | 76483 | 76494 | 76512 |       |
|                                          | (76417) | AGTAAGGAAGAGTTTCCTTGTGTTTAGCATCATAAGCAAAAGCATATATTCGTCCCGGCTGCGGGCGAACAACCTTTATGTCCTTTTACTTGCTTAA |       |       |       |       |       |       |       |       |       |
|                                          | (1)     | -----                                                                                             |       |       |       |       |       |       |       |       |       |
| Section 798                              |         |                                                                                                   |       |       |       |       |       |       |       |       |       |
| T4 NC 000866.4<br>SARS-CoV-2 NC_045512.2 | (76513) | 76513                                                                                             | 76527 | 76538 | 76549 | 76560 | 76571 | 76582 | 76593 | 76608 |       |
|                                          | (76513) | TAGTTTCAGCAAACCACTTCTGGTTTTATTATTAATTGCTGCGCCTTCATTACGAATTTTATCACGCAATGTTTGTCTGAATGAATTTATCATAA   |       |       |       |       |       |       |       |       |       |
|                                          | (1)     | -----                                                                                             |       |       |       |       |       |       |       |       |       |

## SARS-CoV-2 &amp; T4.apr

|                                          |         |                                                                                                    |       |       |       |       |       |       |       |       |       |
|------------------------------------------|---------|----------------------------------------------------------------------------------------------------|-------|-------|-------|-------|-------|-------|-------|-------|-------|
| Section 799                              |         |                                                                                                    |       |       |       |       |       |       |       |       |       |
| T4 NC 000866.4<br>SARS-CoV-2 NC_045512.2 | (76609) | 76609                                                                                              | 76615 | 76626 | 76637 | 76648 | 76659 | 76670 | 76681 | 76692 | 76704 |
|                                          | (76609) | GCAGTTGTCTTTCTTGCTTATTGAGTTTATTCATTGGTTTTGATTCAAGTTTTTGAATCTTTTCAGCCGTTTTAATTCCTGAAGCATATTTTGACA   |       |       |       |       |       |       |       |       |       |
|                                          | (1)     | -----                                                                                              |       |       |       |       |       |       |       |       |       |
| Section 800                              |         |                                                                                                    |       |       |       |       |       |       |       |       |       |
| T4 NC 000866.4<br>SARS-CoV-2 NC_045512.2 | (76705) | 76705                                                                                              | 76714 | 76725 | 76736 | 76747 | 76758 | 76769 | 76780 | 76800 |       |
|                                          | (76705) | TTGCTGAAGTAAACGTAGAGTATTTGATTCCCTCTTTCTTCAGCAAATTGCTTTCCTGTCATTCCCTTTTGCTTTGGCCTTTTTATATTCAAGACCTA |       |       |       |       |       |       |       |       |       |
|                                          | (1)     | -----                                                                                              |       |       |       |       |       |       |       |       |       |
| Section 801                              |         |                                                                                                    |       |       |       |       |       |       |       |       |       |
| T4 NC 000866.4<br>SARS-CoV-2 NC_045512.2 | (76801) | 76801                                                                                              | 76813 | 76824 | 76835 | 76846 | 76857 | 76868 | 76879 | 76896 |       |
|                                          | (76801) | TCTGAATCCATTTCTTTTCGTTTAATGATTGCTTAACCTTTGGAACCTGGGGAGTGCTTTCATTAATTATTTGAAAAATAGCCATTATGCCCCCTT   |       |       |       |       |       |       |       |       |       |
|                                          | (1)     | -----                                                                                              |       |       |       |       |       |       |       |       |       |
| Section 802                              |         |                                                                                                    |       |       |       |       |       |       |       |       |       |
| T4 NC 000866.4<br>SARS-CoV-2 NC_045512.2 | (76897) | 76897                                                                                              | 76912 | 76923 | 76934 | 76945 | 76956 | 76967 | 76978 | 76992 |       |
|                                          | (76897) | AAAGCCAAGAGCTCGTAATCCATCTTCTGTTAGAATTCTAAATTTTATTCACGCTTTTCAGCTAAAGATTGTGCTGCTTTCCATTTGTCAGTGTT    |       |       |       |       |       |       |       |       |       |
|                                          | (1)     | -----                                                                                              |       |       |       |       |       |       |       |       |       |
| Section 803                              |         |                                                                                                    |       |       |       |       |       |       |       |       |       |
| T4 NC 000866.4<br>SARS-CoV-2 NC_045512.2 | (76993) | 76993                                                                                              | 77000 | 77011 | 77022 | 77033 | 77044 | 77055 | 77066 | 77077 | 77088 |
|                                          | (76993) | CACAGACCAGGTATAAATTTTCATTCATAAATCTTTTCTTCGCTGCGGTCGTTAGATGTGCTGGTTTAACTGGTGGTTGTGTTTCTTTTTTAGGTTT  |       |       |       |       |       |       |       |       |       |
|                                          | (1)     | -----                                                                                              |       |       |       |       |       |       |       |       |       |
| Section 804                              |         |                                                                                                    |       |       |       |       |       |       |       |       |       |
| T4 NC 000866.4<br>SARS-CoV-2 NC_045512.2 | (77089) | 77089                                                                                              | 77099 | 77110 | 77121 | 77132 | 77143 | 77154 | 77165 | 77184 |       |
|                                          | (77089) | TATTTCAATAAAAAATTCTTGTCAGAGAAGTCTTTTCATCCAAATATCCATGAAGTATCTACGTTTTTCCCTTCTGCATTACAAAAATAAGGAAT    |       |       |       |       |       |       |       |       |       |
|                                          | (1)     | -----                                                                                              |       |       |       |       |       |       |       |       |       |
| Section 805                              |         |                                                                                                    |       |       |       |       |       |       |       |       |       |
| T4 NC 000866.4<br>SARS-CoV-2 NC_045512.2 | (77185) | 77185                                                                                              | 77198 | 77209 | 77220 | 77231 | 77242 | 77253 | 77264 | 77280 |       |
|                                          | (77185) | TACTGCTGTTTCACTACCCCATGCAATAATTTCTGGATTTTTATCTAACCATTCAAAAAGAATTTTCCCAATTTGATCTATACGTAATTTTTTT     |       |       |       |       |       |       |       |       |       |
|                                          | (1)     | -----                                                                                              |       |       |       |       |       |       |       |       |       |

## SARS-CoV-2 &amp; T4.apr

|                        |         |                                                                                                    |       |       |       |       |       |       |       |       |       |
|------------------------|---------|----------------------------------------------------------------------------------------------------|-------|-------|-------|-------|-------|-------|-------|-------|-------|
| Section 806            |         |                                                                                                    |       |       |       |       |       |       |       |       |       |
| T4 NC_000866.4         | (77281) | 77281                                                                                              | 77286 | 77297 | 77308 | 77319 | 77330 | 77341 | 77352 | 77363 | 77376 |
| SARS-CoV-2 NC_045512.2 | (77281) | AGGGTCACCTCTATACTTTGATATATTTTAGGAACCCATTTTCCAGAATATGCCATTGGATTCTCCTTATAAATAGATAATATATTTATAAACAG    |       |       |       |       |       |       |       |       |       |
|                        | (1)     | -----                                                                                              |       |       |       |       |       |       |       |       |       |
| Section 807            |         |                                                                                                    |       |       |       |       |       |       |       |       |       |
| T4 NC_000866.4         | (77377) | 77377                                                                                              | 77385 | 77396 | 77407 | 77418 | 77429 | 77440 | 77451 |       | 77472 |
| SARS-CoV-2 NC_045512.2 | (77377) | GAGGGCCCCATGCTCTTTACATTTTTTGATCCGATTGAATATGCGGCCAAAACGGTGAATAAAAACGCGCCGACTATTCTTATGACAGATATTTTTTA |       |       |       |       |       |       |       |       |       |
|                        | (1)     | -----                                                                                              |       |       |       |       |       |       |       |       |       |
| Section 808            |         |                                                                                                    |       |       |       |       |       |       |       |       |       |
| T4 NC_000866.4         | (77473) | 77473                                                                                              | 77484 | 77495 | 77506 | 77517 | 77528 | 77539 | 77550 |       | 77568 |
| SARS-CoV-2 NC_045512.2 | (77473) | GAAACTATAAAGACTATTTTAAACGCGCTCTTGCGGGATACCGCTTACGTACTTATTATATTAAAGGTTCAACACGCCCCGGAAGAATTAGCAAATG  |       |       |       |       |       |       |       |       |       |
|                        | (1)     | -----                                                                                              |       |       |       |       |       |       |       |       |       |
| Section 809            |         |                                                                                                    |       |       |       |       |       |       |       |       |       |
| T4 NC_000866.4         | (77569) | 77569                                                                                              | 77583 | 77594 | 77605 | 77616 | 77627 | 77638 | 77649 |       | 77664 |
| SARS-CoV-2 NC_045512.2 | (77569) | CTATATATGGAAATCCACAGCTGTATTGGGTTTTATTGATGTGTAATGATAATTATGACCCGTATTATGGATGGATTACTTCGCAAGAAGCTGCTT   |       |       |       |       |       |       |       |       |       |
|                        | (1)     | -----                                                                                              |       |       |       |       |       |       |       |       |       |
| Section 810            |         |                                                                                                    |       |       |       |       |       |       |       |       |       |
| T4 NC_000866.4         | (77665) | 77665                                                                                              | 77671 | 77682 | 77693 | 77704 | 77715 | 77726 | 77737 | 77748 | 77760 |
| SARS-CoV-2 NC_045512.2 | (77665) | ATCAAGCATCTATACAAAAATACAAAAACGTAGGTGGAGACCAAATAGTATATCATGTGAATGAGAACGGTGAAAAATTTTATAATTTAATATCAT   |       |       |       |       |       |       |       |       |       |
|                        | (1)     | -----                                                                                              |       |       |       |       |       |       |       |       |       |
| Section 811            |         |                                                                                                    |       |       |       |       |       |       |       |       |       |
| T4 NC_000866.4         | (77761) | 77761                                                                                              | 77770 | 77781 | 77792 | 77803 | 77814 | 77825 | 77836 |       | 77856 |
| SARS-CoV-2 NC_045512.2 | (77761) | ACGATGATAATCCATATGTTTGGTATGATAAAGGCGATAAAGCTAGAAAATATCCTCAATATGAAGGAGCGCTTGCTGCGGTCGATACGTATGAAG   |       |       |       |       |       |       |       |       |       |
|                        | (1)     | -----                                                                                              |       |       |       |       |       |       |       |       |       |
| Section 812            |         |                                                                                                    |       |       |       |       |       |       |       |       |       |
| T4 NC_000866.4         | (77857) | 77857                                                                                              | 77869 | 77880 | 77891 | 77902 | 77913 | 77924 | 77935 |       | 77952 |
| SARS-CoV-2 NC_045512.2 | (77857) | CTGCTGTTCTTGAAAATGAAAACTTCGTCAAATAAAAAATAATAGCAAAATCAGACATCAATTCATTTATGAACGACCTTATACGTATAATGGAGA   |       |       |       |       |       |       |       |       |       |
|                        | (1)     | -----                                                                                              |       |       |       |       |       |       |       |       |       |

## SARS-CoV-2 &amp; T4.apr

|                                          |         |                                                                                                     |       |       |       |       |       |       |       |       |       |
|------------------------------------------|---------|-----------------------------------------------------------------------------------------------------|-------|-------|-------|-------|-------|-------|-------|-------|-------|
|                                          |         | Section 813                                                                                         |       |       |       |       |       |       |       |       |       |
| T4 NC 000866.4<br>SARS-CoV-2 NC_045512.2 | (77953) | 77953                                                                                               | 77968 | 77979 | 77990 | 78001 | 78012 | 78023 | 78034 | 78048 |       |
|                                          | (77953) | AATCTTATGGAAATGATAAGTAATAACCTTAATTGGTTTGTTCGGTGTTGTTGAAGATAGAATGGACCCATTAAAATTAGGTCGTGTTTCGTGTTTCGT |       |       |       |       |       |       |       |       |       |
|                                          | (1)     | -----                                                                                               |       |       |       |       |       |       |       |       |       |
|                                          |         | Section 814                                                                                         |       |       |       |       |       |       |       |       |       |
| T4 NC 000866.4<br>SARS-CoV-2 NC_045512.2 | (78049) | 78049                                                                                               | 78056 | 78067 | 78078 | 78089 | 78100 | 78111 | 78122 | 78133 | 78144 |
|                                          | (78049) | GTGGTTGGTCTGCATCCACCTCAAAGAGCACAAAGGTGATGTAATGGGTATTCCAAGTGAAGAAATTACCATGGATGTCAGTTATTCAACCTATAACT  |       |       |       |       |       |       |       |       |       |
|                                          | (1)     | -----                                                                                               |       |       |       |       |       |       |       |       |       |
|                                          |         | Section 815                                                                                         |       |       |       |       |       |       |       |       |       |
| T4 NC 000866.4<br>SARS-CoV-2 NC_045512.2 | (78145) | 78145                                                                                               | 78155 | 78166 | 78177 | 78188 | 78199 | 78210 | 78221 | 78240 |       |
|                                          | (78145) | TCTGCAGCAATGTCTGGAATTGGAGGTTCTGTTACTGGACCAGTAGAAGGAAGTACAGTTTATGGTCATTTTTTTAGACAAATGGAAACTAATGGA    |       |       |       |       |       |       |       |       |       |
|                                          | (1)     | -----                                                                                               |       |       |       |       |       |       |       |       |       |
|                                          |         | Section 816                                                                                         |       |       |       |       |       |       |       |       |       |
| T4 NC 000866.4<br>SARS-CoV-2 NC_045512.2 | (78241) | 78241                                                                                               | 78254 | 78265 | 78276 | 78287 | 78298 | 78309 | 78320 | 78336 |       |
|                                          | (78241) | ATTGTCCTTGGCACGTATGGTGGGAATAGTTCGCGAAAAACCGAATAGACTTGAAGGATTTTCTGACCCAACTGGGCAGTATCCTAGACGTTTAGGA   |       |       |       |       |       |       |       |       |       |
|                                          | (1)     | -----                                                                                               |       |       |       |       |       |       |       |       |       |
|                                          |         | Section 817                                                                                         |       |       |       |       |       |       |       |       |       |
| T4 NC 000866.4<br>SARS-CoV-2 NC_045512.2 | (78337) | 78337                                                                                               | 78342 | 78353 | 78364 | 78375 | 78386 | 78397 | 78408 | 78419 | 78432 |
|                                          | (78337) | AATGATACTAACGTACTAAACCAAGGTGGAGAAGTAGGATATGATTTCGTCTTCTAACGTTATCCAAGATAGTAACCTAGACACCGCAATAAATCCC   |       |       |       |       |       |       |       |       |       |
|                                          | (1)     | -----                                                                                               |       |       |       |       |       |       |       |       |       |
|                                          |         | Section 818                                                                                         |       |       |       |       |       |       |       |       |       |
| T4 NC 000866.4<br>SARS-CoV-2 NC_045512.2 | (78433) | 78433                                                                                               | 78441 | 78452 | 78463 | 78474 | 78485 | 78496 | 78507 | 78528 |       |
|                                          | (78433) | GATGATAGACCGCTATCAGAGATTCCGACCGATGATAATCCAAATATGTCAATGGCTGAAATGCTTCGCCGTGATGAAGGATTAAGATTAAAAGTT    |       |       |       |       |       |       |       |       |       |
|                                          | (1)     | -----                                                                                               |       |       |       |       |       |       |       |       |       |
|                                          |         | Section 819                                                                                         |       |       |       |       |       |       |       |       |       |
| T4 NC 000866.4<br>SARS-CoV-2 NC_045512.2 | (78529) | 78529                                                                                               | 78540 | 78551 | 78562 | 78573 | 78584 | 78595 | 78606 | 78624 |       |
|                                          | (78529) | TATTGGGATACCGAAGGATATCCGACAATTGGTATTGGTCATCTTATCATGAAGCAGCCAGTTCGTGATATGGCTCAAATTAATAAAGTTTTATCA    |       |       |       |       |       |       |       |       |       |
|                                          | (1)     | -----                                                                                               |       |       |       |       |       |       |       |       |       |

## SARS-CoV-2 &amp; T4.apr

|                                          |                |                                                                                                    |       |       |       |       |       |       |       |       |       |
|------------------------------------------|----------------|----------------------------------------------------------------------------------------------------|-------|-------|-------|-------|-------|-------|-------|-------|-------|
|                                          |                | Section 820                                                                                        |       |       |       |       |       |       |       |       |       |
| T4 NC 000866.4<br>SARS-CoV-2 NC_045512.2 | (78625)        | 78625                                                                                              | 78639 | 78650 | 78661 | 78672 | 78683 | 78694 | 78705 | 78720 |       |
|                                          | (78625)<br>(1) | AAACAAGTTGGTCGTGAAATTACAGGAAATCCAGGTTCTATTACAATGGAAGAGGCGACGACTTTATTTGAGCGTGATTTGGCTGATATGCAACGG   |       |       |       |       |       |       |       |       |       |
|                                          |                | Section 821                                                                                        |       |       |       |       |       |       |       |       |       |
| T4 NC 000866.4<br>SARS-CoV-2 NC_045512.2 | (78721)        | 78721                                                                                              | 78727 | 78738 | 78749 | 78760 | 78771 | 78782 | 78793 | 78804 | 78816 |
|                                          | (78721)<br>(1) | GACATTAAATCACATTCTAAAGTAGGACCAGTCTGGCAAGCTGTCAACCGTTCTCGTCAAATGGCGTTAGAAAATATGGCATTTCAGATGGGTGTT   |       |       |       |       |       |       |       |       |       |
|                                          |                | Section 822                                                                                        |       |       |       |       |       |       |       |       |       |
| T4 NC 000866.4<br>SARS-CoV-2 NC_045512.2 | (78817)        | 78817                                                                                              | 78826 | 78837 | 78848 | 78859 | 78870 | 78881 | 78892 | 78912 |       |
|                                          | (78817)<br>(1) | GGTGGTGTAGCTAAATTTAACACAATGTAACTGCTATGTTAGCAGGAGATTGGGAAAAAGCGTATAAAGCCGGTCGTGATTCATTGTGGTATCAA    |       |       |       |       |       |       |       |       |       |
|                                          |                | Section 823                                                                                        |       |       |       |       |       |       |       |       |       |
| T4 NC 000866.4<br>SARS-CoV-2 NC_045512.2 | (78913)        | 78913                                                                                              | 78925 | 78936 | 78947 | 78958 | 78969 | 78980 | 78991 | 79008 |       |
|                                          | (78913)<br>(1) | CAAACAAAAGGCCGTGCATCCCGTGTTACCATGATTATTCTTACGGGGAATTTGGAATCATATGGTGTGAAAGTAAAACCCAGCTAGGTCTCTA     |       |       |       |       |       |       |       |       |       |
|                                          |                | Section 824                                                                                        |       |       |       |       |       |       |       |       |       |
| T4 NC 000866.4<br>SARS-CoV-2 NC_045512.2 | (79009)        | 79009                                                                                              | 79024 | 79035 | 79046 | 79057 | 79068 | 79079 | 79090 | 79104 |       |
|                                          | (79009)<br>(1) | TCAGCAATGGCTGCTACTGTAGCTAAATCTTCTGACCCTGCTGACCCTCCTATTCCAAATGACTCGAGAATTTTATTCAAAGAACCAGTTTCTTCA   |       |       |       |       |       |       |       |       |       |
|                                          |                | Section 825                                                                                        |       |       |       |       |       |       |       |       |       |
| T4 NC 000866.4<br>SARS-CoV-2 NC_045512.2 | (79105)        | 79105                                                                                              | 79112 | 79123 | 79134 | 79145 | 79156 | 79167 | 79178 | 79189 | 79200 |
|                                          | (79105)<br>(1) | TATAAAGGTGAATATCCTTATGTGCATACAATGGAACTGAAAGCGGACATATTCAGGAATTTGATGATACCCCTGGGCAAGAACGATATAGATTA    |       |       |       |       |       |       |       |       |       |
|                                          |                | Section 826                                                                                        |       |       |       |       |       |       |       |       |       |
| T4 NC 000866.4<br>SARS-CoV-2 NC_045512.2 | (79201)        | 79201                                                                                              | 79211 | 79222 | 79233 | 79244 | 79255 | 79266 | 79277 | 79296 |       |
|                                          | (79201)<br>(1) | GTTTCATCCAACCTGGAACTTATGAAGAAGTATCACCATCAGGAAGAAGAACAAGAAAAACTGTTGATAATTTGTATGATATAACCAATGCTGATGGT |       |       |       |       |       |       |       |       |       |

## SARS-CoV-2 &amp; T4.apr

|                                          |         |                                                                                                   |                       |                       |                       |                       |                       |                       |                       |                       |                       |
|------------------------------------------|---------|---------------------------------------------------------------------------------------------------|-----------------------|-----------------------|-----------------------|-----------------------|-----------------------|-----------------------|-----------------------|-----------------------|-----------------------|
|                                          |         | Section 827                                                                                       |                       |                       |                       |                       |                       |                       |                       |                       |                       |
| T4 NC 000866.4<br>SARS-CoV-2 NC_045512.2 | (79297) | <a href="#">79297</a>                                                                             | <a href="#">79310</a> | <a href="#">79321</a> | <a href="#">79332</a> | <a href="#">79343</a> | <a href="#">79354</a> | <a href="#">79365</a> | <a href="#">79376</a> | <a href="#">79392</a> |                       |
|                                          | (79297) | AATTTTTTTGGTAGCCGGTGATAAAAAGACTAACGTCGGTGGTTCAGAAATTTATTATAACATGGATAATCGTTTACATCAAATCGATGGAAGCAAT |                       |                       |                       |                       |                       |                       |                       |                       |                       |
|                                          | (1)     | -----                                                                                             |                       |                       |                       |                       |                       |                       |                       |                       |                       |
|                                          |         | Section 828                                                                                       |                       |                       |                       |                       |                       |                       |                       |                       |                       |
| T4 NC 000866.4<br>SARS-CoV-2 NC_045512.2 | (79393) | <a href="#">79393</a>                                                                             | <a href="#">79398</a> | <a href="#">79409</a> | <a href="#">79420</a> | <a href="#">79431</a> | <a href="#">79442</a> | <a href="#">79453</a> | <a href="#">79464</a> | <a href="#">79475</a> | <a href="#">79488</a> |
|                                          | (79393) | ACAATATTTGTACGTGGAGACGAAACGAAAACGTTGAAGGTAATGGAACATCCTAGTTAAAGGTAATGTTACTATTATAGTTGAAGGTAATGCT    |                       |                       |                       |                       |                       |                       |                       |                       |                       |
|                                          | (1)     | -----                                                                                             |                       |                       |                       |                       |                       |                       |                       |                       |                       |
|                                          |         | Section 829                                                                                       |                       |                       |                       |                       |                       |                       |                       |                       |                       |
| T4 NC 000866.4<br>SARS-CoV-2 NC_045512.2 | (79489) | <a href="#">79489</a>                                                                             | <a href="#">79497</a> | <a href="#">79508</a> | <a href="#">79519</a> | <a href="#">79530</a> | <a href="#">79541</a> | <a href="#">79552</a> | <a href="#">79563</a> | <a href="#">79584</a> |                       |
|                                          | (79489) | GACATTACAGTTAAAGGAGATGCTACCACTTTAGTTGAAGGAAATCAAACACAGTAAATGGAAATCTTTCTTGAAAGTTGCCGGGACAGTT       |                       |                       |                       |                       |                       |                       |                       |                       |                       |
|                                          | (1)     | -----                                                                                             |                       |                       |                       |                       |                       |                       |                       |                       |                       |
|                                          |         | Section 830                                                                                       |                       |                       |                       |                       |                       |                       |                       |                       |                       |
| T4 NC 000866.4<br>SARS-CoV-2 NC_045512.2 | (79585) | <a href="#">79585</a>                                                                             | <a href="#">79596</a> | <a href="#">79607</a> | <a href="#">79618</a> | <a href="#">79629</a> | <a href="#">79640</a> | <a href="#">79651</a> | <a href="#">79662</a> | <a href="#">79680</a> |                       |
|                                          | (79585) | GATTGGGATGTCGGTGGTGATTGGACAGAAAAATGGCATCTATGAGTTCTATTTTCATCTGGTCAATACACAATTGATGGATCGAGGATTGACATT  |                       |                       |                       |                       |                       |                       |                       |                       |                       |
|                                          | (1)     | -----                                                                                             |                       |                       |                       |                       |                       |                       |                       |                       |                       |
|                                          |         | Section 831                                                                                       |                       |                       |                       |                       |                       |                       |                       |                       |                       |
| T4 NC 000866.4<br>SARS-CoV-2 NC_045512.2 | (79681) | <a href="#">79681</a>                                                                             | <a href="#">79695</a> | <a href="#">79706</a> | <a href="#">79717</a> | <a href="#">79728</a> | <a href="#">79739</a> | <a href="#">79750</a> | <a href="#">79761</a> | <a href="#">79776</a> |                       |
|                                          | (79681) | GGCTAATATACTTCCAATGAGCGCTGATTTAGGAGAATCCATGGAAGGTTCTTCTATCGACGTCACCTTTACCGCTCAATTAGAAACAGGTGAAAC  |                       |                       |                       |                       |                       |                       |                       |                       |                       |
|                                          | (1)     | -----                                                                                             |                       |                       |                       |                       |                       |                       |                       |                       |                       |
|                                          |         | Section 832                                                                                       |                       |                       |                       |                       |                       |                       |                       |                       |                       |
| T4 NC 000866.4<br>SARS-CoV-2 NC_045512.2 | (79777) | <a href="#">79777</a>                                                                             | <a href="#">79783</a> | <a href="#">79794</a> | <a href="#">79805</a> | <a href="#">79816</a> | <a href="#">79827</a> | <a href="#">79838</a> | <a href="#">79849</a> | <a href="#">79860</a> | <a href="#">79872</a> |
|                                          | (79777) | GTTAGTATCTATAAAATATAACTAGTTACGAAGAACTCCTGGGGTTTTAGTAGAAGAAAATCGCTTATATGGAACATATGAATCTGTATTTGGTTT  |                       |                       |                       |                       |                       |                       |                       |                       |                       |
|                                          | (1)     | -----                                                                                             |                       |                       |                       |                       |                       |                       |                       |                       |                       |
|                                          |         | Section 833                                                                                       |                       |                       |                       |                       |                       |                       |                       |                       |                       |
| T4 NC 000866.4<br>SARS-CoV-2 NC_045512.2 | (79873) | <a href="#">79873</a>                                                                             | <a href="#">79882</a> | <a href="#">79893</a> | <a href="#">79904</a> | <a href="#">79915</a> | <a href="#">79926</a> | <a href="#">79937</a> | <a href="#">79948</a> | <a href="#">79968</a> |                       |
|                                          | (79873) | CGGAAATGACGCGTTGAAATATCGTTTAGGCGATGAATTTAAACTGCTGCTTCATGGGAAGAACTTCCTACTGATTCTGATACTCAGTTGTATTT   |                       |                       |                       |                       |                       |                       |                       |                       |                       |
|                                          | (1)     | -----                                                                                             |                       |                       |                       |                       |                       |                       |                       |                       |                       |

## SARS-CoV-2 &amp; T4.apr

|                                          |         |                                                                                                    |       |       |       |       |       |       |       |             |       |
|------------------------------------------|---------|----------------------------------------------------------------------------------------------------|-------|-------|-------|-------|-------|-------|-------|-------------|-------|
|                                          |         |                                                                                                    |       |       |       |       |       |       |       | Section 834 |       |
| T4 NC 000866.4<br>SARS-CoV-2 NC_045512.2 | (79969) | 79969                                                                                              | 79981 | 79992 | 80003 | 80014 | 80025 | 80036 | 80047 | 80064       |       |
|                                          | (79969) | GTGGAAAGCTCCTCAAAACCTCCAGAAGACATTCACTTACGAAGTAACATTAATATATGACTACCAAGAACAAAGTGAATCTGGGGGTTCTGGCAG   |       |       |       |       |       |       |       |             |       |
|                                          | (1)     | -----                                                                                              |       |       |       |       |       |       |       |             |       |
|                                          |         |                                                                                                    |       |       |       |       |       |       |       | Section 835 |       |
| T4 NC 000866.4<br>SARS-CoV-2 NC_045512.2 | (80065) | 80065                                                                                              | 80080 | 80091 | 80102 | 80113 | 80124 | 80135 | 80146 | 80160       |       |
|                                          | (80065) | TAATTCTAGGTCATCTTCTGATACTACTGAACCGACAGATCCTCCTGCTCCAGTAAGAAAACTCTAGTTAAAAATTATACTAAACTATAGTTGG     |       |       |       |       |       |       |       |             |       |
|                                          | (1)     | -----                                                                                              |       |       |       |       |       |       |       |             |       |
|                                          |         |                                                                                                    |       |       |       |       |       |       |       | Section 836 |       |
| T4 NC 000866.4<br>SARS-CoV-2 NC_045512.2 | (80161) | 80161                                                                                              | 80168 | 80179 | 80190 | 80201 | 80212 | 80223 | 80234 | 80245       | 80256 |
|                                          | (80161) | AAATTGGAGTCGTTGGGCTAATAAACTGAGAAAAATATGCCTATGCAAGACCATAAATATTTTTATTTGTATTCAATAACTAATAAAACAACAGAAA  |       |       |       |       |       |       |       |             |       |
|                                          | (1)     | -----                                                                                              |       |       |       |       |       |       |       |             |       |
|                                          |         |                                                                                                    |       |       |       |       |       |       |       | Section 837 |       |
| T4 NC 000866.4<br>SARS-CoV-2 NC_045512.2 | (80257) | 80257                                                                                              | 80267 | 80278 | 80289 | 80300 | 80311 | 80322 | 80333 | 80352       |       |
|                                          | (80257) | AAATTTTATGTAGGCGTCCACAAAACCTCAAATTTGGATGATGGGTATATGGGTTCTGGCGTTGCCATTAAAAATGCCATTAAAAATATGGCATAG   |       |       |       |       |       |       |       |             |       |
|                                          | (1)     | -----                                                                                              |       |       |       |       |       |       |       |             |       |
|                                          |         |                                                                                                    |       |       |       |       |       |       |       | Section 838 |       |
| T4 NC 000866.4<br>SARS-CoV-2 NC_045512.2 | (80353) | 80353                                                                                              | 80366 | 80377 | 80388 | 80399 | 80410 | 80421 | 80432 | 80448       |       |
|                                          | (80353) | ATAATTTTTATAAGCATATTATAAAATCTTTGAATCTGAAAAAGCTATGTATGACGCAGAGGCAGAAATAGTCACAGAGGAATTTGTTAAATCTA    |       |       |       |       |       |       |       |             |       |
|                                          | (1)     | -----                                                                                              |       |       |       |       |       |       |       |             |       |
|                                          |         |                                                                                                    |       |       |       |       |       |       |       | Section 839 |       |
| T4 NC 000866.4<br>SARS-CoV-2 NC_045512.2 | (80449) | 80449                                                                                              | 80454 | 80465 | 80476 | 80487 | 80498 | 80509 | 80520 | 80531       | 80544 |
|                                          | (80449) | AGAAAACCTTATAATATGAAACTAGGCGGTATCGGTGGCTTCCCAAAACATAACACAGCGGGTGCTAAAAATGGATTTTACGGTAAATCTCATTTCGC |       |       |       |       |       |       |       |             |       |
|                                          | (1)     | -----                                                                                              |       |       |       |       |       |       |       |             |       |
|                                          |         |                                                                                                    |       |       |       |       |       |       |       | Section 840 |       |
| T4 NC 000866.4<br>SARS-CoV-2 NC_045512.2 | (80545) | 80545                                                                                              | 80553 | 80564 | 80575 | 80586 | 80597 | 80608 | 80619 | 80640       |       |
|                                          | (80545) | GTGAAACTAGATTGAAAAATTAGCATTAATCGTCTAGAAAAAGAGGGCCTAGAGGGCTAGAGGTAAACTCTGAAGATGTGTGGCGCCAATAACCC    |       |       |       |       |       |       |       |             |       |
|                                          | (1)     | -----                                                                                              |       |       |       |       |       |       |       |             |       |



## SARS-CoV-2 &amp; T4.apr

|                        |         |                                                                                                   |       |       |       |       |       |       |       |             |       |
|------------------------|---------|---------------------------------------------------------------------------------------------------|-------|-------|-------|-------|-------|-------|-------|-------------|-------|
|                        |         |                                                                                                   |       |       |       |       |       |       |       | Section 841 |       |
|                        | (80641) | 80641                                                                                             | 80652 | 80663 | 80674 | 80685 | 80696 | 80707 | 80718 | 80736       |       |
| T4 NC 000866.4         | (80641) | AAGGTATGGCAAAATAGCCCCTAATGCTAAATCTGTTATTATCAACGGCGTTTTATATAAAAGTATTAAAATCGCAGCTAAAGCTCTTAATATAAA  |       |       |       |       |       |       |       |             |       |
| SARS-CoV-2 NC_045512.2 | (1)     | -----                                                                                             |       |       |       |       |       |       |       |             |       |
|                        |         |                                                                                                   |       |       |       |       |       |       |       | Section 842 |       |
|                        | (80737) | 80737                                                                                             | 80751 | 80762 | 80773 | 80784 | 80795 | 80806 | 80817 | 80832       |       |
| T4 NC 000866.4         | (80737) | TTATAGTACCTTAAAGGGGCGAGTTAAAGCGGGGTATTATAAATGTCAGGATTAAGTTATGATAAGTGTGTTACTGCTGGCCATGAAGCGTGGCCT  |       |       |       |       |       |       |       |             |       |
| SARS-CoV-2 NC_045512.2 | (1)     | -----                                                                                             |       |       |       |       |       |       |       |             |       |
|                        |         |                                                                                                   |       |       |       |       |       |       |       | Section 843 |       |
|                        | (80833) | 80833                                                                                             | 80839 | 80850 | 80861 | 80872 | 80883 | 80894 | 80905 | 80916       | 80928 |
| T4 NC 000866.4         | (80833) | CCAACAGTTGTGAATGCTACACAAAGTAAAGTATTCCTGAGGGAATTGCTGTTCTCGTAGCAGGCGATCCAATTACAGAACATACAGAAATTAAA   |       |       |       |       |       |       |       |             |       |
| SARS-CoV-2 NC_045512.2 | (1)     | -----                                                                                             |       |       |       |       |       |       |       |             |       |
|                        |         |                                                                                                   |       |       |       |       |       |       |       | Section 844 |       |
|                        | (80929) | 80929                                                                                             | 80938 | 80949 | 80960 | 80971 | 80982 | 80993 | 81004 | 81024       |       |
| T4 NC 000866.4         | (80929) | AAGCCGTATGAAACACATGGCGGAGTGACACAACCTAGAACTTCTAAGGTATATGTCCTGGAAGAAAGCTGTTCAAATGGCTGATCCAATATCA    |       |       |       |       |       |       |       |             |       |
| SARS-CoV-2 NC_045512.2 | (1)     | -----                                                                                             |       |       |       |       |       |       |       |             |       |
|                        |         |                                                                                                   |       |       |       |       |       |       |       | Section 845 |       |
|                        | (81025) | 81025                                                                                             | 81037 | 81048 | 81059 | 81070 | 81081 | 81092 | 81103 | 81120       |       |
| T4 NC 000866.4         | (81025) | TGCGGTGATACTGTGGCTCAGGCATCATCTAAAGTATTCATTAAATAGGATTTAAAATGGCAAATACCCCTGTAAATTATCAATTAACAAGAACAG  |       |       |       |       |       |       |       |             |       |
| SARS-CoV-2 NC_045512.2 | (1)     | -----                                                                                             |       |       |       |       |       |       |       |             |       |
|                        |         |                                                                                                   |       |       |       |       |       |       |       | Section 846 |       |
|                        | (81121) | 81121                                                                                             | 81136 | 81147 | 81158 | 81169 | 81180 | 81191 | 81202 | 81216       |       |
| T4 NC 000866.4         | (81121) | CAAATGCTATTCCCGAGATATTCGTGCGGGGTACATTTGCTGAAATAAAACAAAACCTCATTGAATGGCTTAATGGCCAAAATGAATTTTTGGATT  |       |       |       |       |       |       |       |             |       |
| SARS-CoV-2 NC_045512.2 | (1)     | -----                                                                                             |       |       |       |       |       |       |       |             |       |
|                        |         |                                                                                                   |       |       |       |       |       |       |       | Section 847 |       |
|                        | (81217) | 81217                                                                                             | 81224 | 81235 | 81246 | 81257 | 81268 | 81279 | 81290 | 81301       | 81312 |
| T4 NC 000866.4         | (81217) | ATGATTTTGAAGGCTCAAGATTAAACGTTCTGTGTGACCTTTTAGCTTATAATACATTATACATTACAGCAGTTTGGTAATGCTGCTGTGTATGAAA |       |       |       |       |       |       |       |             |       |
| SARS-CoV-2 NC_045512.2 | (1)     | -----                                                                                             |       |       |       |       |       |       |       |             |       |

## SARS-CoV-2 &amp; T4.apr

|                        |         |                                                                                                   |       |       |       |       |       |       |       |       |             |        |        |     |       |      |         |     |         |       |     |         |         |      |         |       |       |        |      |      |      |      |       |     |      |        |     |     |     |     |    |      |     |       |     |     |     |      |     |     |    |     |       |
|------------------------|---------|---------------------------------------------------------------------------------------------------|-------|-------|-------|-------|-------|-------|-------|-------|-------------|--------|--------|-----|-------|------|---------|-----|---------|-------|-----|---------|---------|------|---------|-------|-------|--------|------|------|------|------|-------|-----|------|--------|-----|-----|-----|-----|----|------|-----|-------|-----|-----|-----|------|-----|-----|----|-----|-------|
|                        |         |                                                                                                   |       |       |       |       |       |       |       |       | Section 848 |        |        |     |       |      |         |     |         |       |     |         |         |      |         |       |       |        |      |      |      |      |       |     |      |        |     |     |     |     |    |      |     |       |     |     |     |      |     |     |    |     |       |
|                        | (81313) | 81313                                                                                             | 81323 | 81334 | 81345 | 81356 | 81367 | 81378 | 81389 | 81408 |             |        |        |     |       |      |         |     |         |       |     |         |         |      |         |       |       |        |      |      |      |      |       |     |      |        |     |     |     |     |    |      |     |       |     |     |     |      |     |     |    |     |       |
| T4 NC_000866.4         | (81313) | GCTTTATGCGTACTGCTAACTTACGAAGTTCAGTTGTTCAAGCTGCACAAGATAACGGATATTTACCTACTTCAAAATCCGCTGCGCAGACCGAAA  |       |       |       |       |       |       |       |       |             |        |        |     |       |      |         |     |         |       |     |         |         |      |         |       |       |        |      |      |      |      |       |     |      |        |     |     |     |     |    |      |     |       |     |     |     |      |     |     |    |     |       |
| SARS-CoV-2 NC_045512.2 | (1)     | -----                                                                                             |       |       |       |       |       |       |       |       |             |        |        |     |       |      |         |     |         |       |     |         |         |      |         |       |       |        |      |      |      |      |       |     |      |        |     |     |     |     |    |      |     |       |     |     |     |      |     |     |    |     |       |
|                        |         |                                                                                                   |       |       |       |       |       |       |       |       | Section 849 |        |        |     |       |      |         |     |         |       |     |         |         |      |         |       |       |        |      |      |      |      |       |     |      |        |     |     |     |     |    |      |     |       |     |     |     |      |     |     |    |     |       |
|                        | (81409) | 81409                                                                                             | 81422 | 81433 | 81444 | 81455 | 81466 | 81477 | 81488 | 81504 |             |        |        |     |       |      |         |     |         |       |     |         |         |      |         |       |       |        |      |      |      |      |       |     |      |        |     |     |     |     |    |      |     |       |     |     |     |      |     |     |    |     |       |
| T4 NC_000866.4         | (81409) | TTATGTTAAACATGCACTGACGCATTGAATAGGAATTACATTACTATTCTCGCGGAAGCTCGCTTTTTAGCATATGCAAAAGATACTTCTGTTAATC |       |       |       |       |       |       |       |       |             |        |        |     |       |      |         |     |         |       |     |         |         |      |         |       |       |        |      |      |      |      |       |     |      |        |     |     |     |     |    |      |     |       |     |     |     |      |     |     |    |     |       |
| SARS-CoV-2 NC_045512.2 | (1)     | -----                                                                                             |       |       |       |       |       |       |       |       |             |        |        |     |       |      |         |     |         |       |     |         |         |      |         |       |       |        |      |      |      |      |       |     |      |        |     |     |     |     |    |      |     |       |     |     |     |      |     |     |    |     |       |
|                        |         |                                                                                                   |       |       |       |       |       |       |       |       | Section 850 |        |        |     |       |      |         |     |         |       |     |         |         |      |         |       |       |        |      |      |      |      |       |     |      |        |     |     |     |     |    |      |     |       |     |     |     |      |     |     |    |     |       |
|                        | (81505) | 81505                                                                                             | 81510 | 81521 | 81532 | 81543 | 81554 | 81565 | 81576 | 81587 | 81600       |        |        |     |       |      |         |     |         |       |     |         |         |      |         |       |       |        |      |      |      |      |       |     |      |        |     |     |     |     |    |      |     |       |     |     |     |      |     |     |    |     |       |
| T4 NC_000866.4         | (81505) | CATATAACTTCGTTTCTAGGGAAGACGTTATTGCTATTTCGTGAT                                                     |       |       |       |       |       |       |       |       | AAAA        | TAACCA | ATA    | TT  | TTCC  | GC   | GT      | TT  | AAAA    | TTGGC | CCA | GGGACGT | A       | TAGT | AA      |       |       |        |      |      |      |      |       |     |      |        |     |     |     |     |    |      |     |       |     |     |     |      |     |     |    |     |       |
| SARS-CoV-2 NC_045512.2 | (1)     | -----                                                                                             |       |       |       |       |       |       |       |       | ATT         | AA     | AGGTTT | ATA | CC    | TTCC | CAG     | GT  | AA      | CA    | AA  | ACCAA   | CCA     | AC   | ----    | TT    | TCG   | AT     |      |      |      |      |       |     |      |        |     |     |     |     |    |      |     |       |     |     |     |      |     |     |    |     |       |
|                        |         |                                                                                                   |       |       |       |       |       |       |       |       | Section 851 |        |        |     |       |      |         |     |         |       |     |         |         |      |         |       |       |        |      |      |      |      |       |     |      |        |     |     |     |     |    |      |     |       |     |     |     |      |     |     |    |     |       |
|                        | (81601) | 81601                                                                                             | 81609 | 81620 | 81631 | 81642 | 81653 | 81664 | 81675 | 81696 |             |        |        |     |       |      |         |     |         |       |     |         |         |      |         |       |       |        |      |      |      |      |       |     |      |        |     |     |     |     |    |      |     |       |     |     |     |      |     |     |    |     |       |
| T4 NC_000866.4         | (81601) | GAAC                                                                                              |       |       |       |       |       |       |       |       | TG          | AA     | ATCA   | TT  | TATGA | TAAA | TT      | AAC | ACCTATT | ATCA  | TT  | TATG    | ATAAAAA | TATT | GAT     | AG    | AA    | CCAGGT | TAA  | TT   | ATAC | --GT | TG    | AT  | GG   | AGCGGA |     |     |     |     |    |      |     |       |     |     |     |      |     |     |    |     |       |
| SARS-CoV-2 NC_045512.2 | (48)    | CTCT                                                                                              |       |       |       |       |       |       |       |       | TG          | TA     | GATC   | TG  | TCTC  | TAAA | CG      | AAC | TTT     | --    | AAA | ATC     | TG      | TG   | GGCTGTC | ACTCG | GCTGC | ATG    | CTTA | GTGC | ACT  | CACG | CAGTA | TAA | TTA  | ATAACT |     |     |     |     |    |      |     |       |     |     |     |      |     |     |    |     |       |
|                        |         |                                                                                                   |       |       |       |       |       |       |       |       | Section 852 |        |        |     |       |      |         |     |         |       |     |         |         |      |         |       |       |        |      |      |      |      |       |     |      |        |     |     |     |     |    |      |     |       |     |     |     |      |     |     |    |     |       |
|                        | (81697) | 81697                                                                                             | 81708 | 81719 | 81730 | 81741 | 81752 | 81763 | 81774 | 81792 |             |        |        |     |       |      |         |     |         |       |     |         |         |      |         |       |       |        |      |      |      |      |       |     |      |        |     |     |     |     |    |      |     |       |     |     |     |      |     |     |    |     |       |
| T4 NC_000866.4         | (81697) | AT                                                                                                |       |       |       |       |       |       |       |       | -----       | GGAT   | TT     | AAC | TGGAC | GAG  | AA      | AGT | CA      | AT    | G   | GT      | TC      | ATG  | CT      | GG    | TT    | CA     | ACAT | --   | CA   | ACGA | TTT   | ACT | TATA | TGCG   | TG  | AA  | C   | TAT | TG | AT   | GG  | AA    | ACA | CT  |     |      |     |     |    |     |       |
| SARS-CoV-2 NC_045512.2 | (142)   | A                                                                                                 |       |       |       |       |       |       |       |       | ATTACT      | GT     | CG     | TT  | G     | AC   | AGGAC   | AC  | G       | --    | AGT | A       | ACT     | CGT  | CT      | AT    | CT    | TC     | TG   | CA   | GGC  | T    | G     | CTT | ACG  | G      | TTT | CGT | CCG | TGT | -  | TG   | CAG | C     | GAT | C   | AT  | CAGC | ACA | TC  |    |     |       |
|                        |         |                                                                                                   |       |       |       |       |       |       |       |       | Section 853 |        |        |     |       |      |         |     |         |       |     |         |         |      |         |       |       |        |      |      |      |      |       |     |      |        |     |     |     |     |    |      |     |       |     |     |     |      |     |     |    |     |       |
|                        | (81793) | 81793                                                                                             | 81807 | 81818 | 81829 | 81840 | 81851 | 81862 | 81873 | 81888 |             |        |        |     |       |      |         |     |         |       |     |         |         |      |         |       |       |        |      |      |      |      |       |     |      |        |     |     |     |     |    |      |     |       |     |     |     |      |     |     |    |     |       |
| T4 NC_000866.4         | (81793) | GA                                                                                                |       |       |       |       |       |       |       |       | ATTCTA      | TTT    | TG     | GT  | GAA   | GGT  | GAAA    | TTT | CT      | G     | TTA | AATG    | CTTC    | TG   | A       | AGG   | AGC   | TT     | GA   | CC   | GC   | TAA  | TT    | AT  | AT   | CG     | AG  | GT  | CTT | AA  | AC | CTA  | CT  | CAGA  | ACT | CT  |     |      |     |     |    |     |       |
| SARS-CoV-2 NC_045512.2 | (234)   | TA                                                                                                |       |       |       |       |       |       |       |       | AGG         | ---    | TTT    | C   | GT    | CCG  | GGT     | --- | G       | T     | GA  | C       | G       | AA   | AGGTA   | AGA   | TG    | G      | AG   | -    | AGC  | TT   | G     | T   | CCC  | -      | TGG | TTT | CA  | CG  | -  | AG   | AAA | AC    | AC  | GTC | CA  | ACTC | AG  | TTT |    |     |       |
|                        |         |                                                                                                   |       |       |       |       |       |       |       |       | Section 854 |        |        |     |       |      |         |     |         |       |     |         |         |      |         |       |       |        |      |      |      |      |       |     |      |        |     |     |     |     |    |      |     |       |     |     |     |      |     |     |    |     |       |
|                        | (81889) | 81889                                                                                             | 81895 | 81906 | 81917 | 81928 | 81939 | 81950 | 81961 | 81972 | 81984       |        |        |     |       |      |         |     |         |       |     |         |         |      |         |       |       |        |      |      |      |      |       |     |      |        |     |     |     |     |    |      |     |       |     |     |     |      |     |     |    |     |       |
| T4 NC_000866.4         | (81889) | AC                                                                                                |       |       |       |       |       |       |       |       | GAT         | T      | G      | TTA | TT    | GAGT | TACATTA | GT  | ACT     | A     | --  | AT      | G       | T    | G       | GCT   | GAC   | G      | CG   | AA   | -    | CG   | AG    | CAG | TC   | GG     | AT  | TT  | -   | TC  | AT | AC   | G   | CAGAT | TAC | ATT | AA  | C    | AA  | AT  | AT | A   | ACTGT |
| SARS-CoV-2 NC_045512.2 | (319)   | G                                                                                                 |       |       |       |       |       |       |       |       | C           | TG     | TT     | TA  | CAG   | GGT  | TCGCGAC | GT  | G       | CT    | CGT | AC      | G       | T    | G       | GCT   | TTG   | G      | AG   | ACT  | C    | CGT  | G     | AG  | GA   | GG     | T   | CTA | TC  | AG  | GC | ACGT | -   | CA    | AC  | AT  | CTT | AA   | AG  | AT  | G  | GCA |       |

## SARS-CoV-2 &amp; T4.apr

|                                          |         |             |            |           |        |          |           |       |         |       |        |
|------------------------------------------|---------|-------------|------------|-----------|--------|----------|-----------|-------|---------|-------|--------|
|                                          |         | Section 855 |            |           |        |          |           |       |         |       |        |
| T4 NC 000866.4<br>SARS-CoV-2 NC_045512.2 | (81985) | 81985       | 81994      | 82005     | 82016  | 82027    | 82038     | 82049 | 82060   | 82080 |        |
|                                          | (81971) | CA          | TCAATA     | TTAA      | TGA    | AAATCC   | AAACGATGA | TC    | CAGAT   | TTTGT | TGGGG  |
|                                          | (414)   | CT          | TGTGGC     | TTAG      | TAG    | AAAT     | TG        | AAAT  | AAAGGCG | TTT   | TG     |
|                                          |         | Section 856 |            |           |        |          |           |       |         |       |        |
| T4 NC 000866.4<br>SARS-CoV-2 NC_045512.2 | (82081) | 82081       | 82093      | 82104     | 82115  | 82126    | 82137     | 82148 | 82159   | 82176 |        |
|                                          | (82067) | TACT        | AT         | TAAACGCGA | AA     | CCCCA    | CAACG     | AT    | GC      | GT    | AACTG  |
|                                          | (503)   | CTCT        | AT         | GGTCATGTT | A      | TGGTTG   | AGCTG     | TA    | GC      | AG    | AACT   |
|                                          |         | Section 857 |            |           |        |          |           |       |         |       |        |
| T4 NC 000866.4<br>SARS-CoV-2 NC_045512.2 | (82177) | 82177       | 82192      | 82203     | 82214  | 82225    | 82236     | 82247 | 82258   | 82272 |        |
|                                          | (82160) | TCAGAC      | TTTCACT    | G         | ATTCT  | ACTA     | AA        | ACCTG | GG      | TAT   | GC     |
|                                          | (598)   | -----       | GGCGAA     | --        | AT     | ACCA     | GTG       | ---   | GC      | ---   | TTA    |
|                                          |         | Section 858 |            |           |        |          |           |       |         |       |        |
| T4 NC 000866.4<br>SARS-CoV-2 NC_045512.2 | (82273) | 82273       | 82280      | 82291     | 82302  | 82313    | 82324     | 82335 | 82346   | 82357 | 82368  |
|                                          | (82255) | TT          | AAAAAT     | -TATC     | TC     | AA       | GACTA     | TA    | ATTT    | AG    | CT     |
|                                          | (669)   | GT          | ACGGCGCCGA | TC        | TA     | A--G     | TC        | ATTT  | GA      | CT    | TAGGCG |
|                                          |         | Section 859 |            |           |        |          |           |       |         |       |        |
| T4 NC 000866.4<br>SARS-CoV-2 NC_045512.2 | (82369) | 82369       | 82379      | 82390     | 82401  | 82412    | 82423     | 82434 | 82445   | 82464 |        |
|                                          | (82347) | AC          | ATAT       | GCT       | TTA    | AAATAAAC | TG        | CA    | AGA     | AT    | CG     |
|                                          | (762)   | GC          | AGTG       | GTG       | TTA    | C---CCG  | TG        | AA    | CTC     | AT    | GCG    |
|                                          |         | Section 860 |            |           |        |          |           |       |         |       |        |
| T4 NC 000866.4<br>SARS-CoV-2 NC_045512.2 | (82465) | 82465       | 82478      | 82489     | 82500  | 82511    | 82522     | 82533 | 82544   | 82560 |        |
|                                          | (82443) | TT          | TA         | AC        | TCGTCT | TT       | CGCT      | AAAT  | CT      | AAGA  | TG     |
|                                          | (849)   | GC          | TA         | C         | CT---  | CT       | GAG       | TG    | CA      | TAA   | AG     |
|                                          |         | Section 861 |            |           |        |          |           |       |         |       |        |
| T4 NC 000866.4<br>SARS-CoV-2 NC_045512.2 | (82561) | 82561       | 82566      | 82577     | 82588  | 82599    | 82610     | 82621 | 82632   | 82643 | 82656  |
|                                          | (82537) | GT          | GAA        | GTA       | CA     | AAA      | CT        | CT    | AT      | TA    | AA     |
|                                          | (942)   | GG          | GT         | GTA       | CA     | CTG      | CT        | G     | CG      | TG    | AA     |

## SARS-CoV-2 &amp; T4.apr

|                        |         |                                                                                                        |       |       |       |       |       |       |       |       |       |       |
|------------------------|---------|--------------------------------------------------------------------------------------------------------|-------|-------|-------|-------|-------|-------|-------|-------|-------|-------|
|                        |         | Section 862                                                                                            |       |       |       |       |       |       |       |       |       |       |
|                        |         | (82657)                                                                                                | 82657 | 82665 | 82676 | 82687 | 82698 | 82709 | 82720 | 82731 | 82752 |       |
| T4 NC_000866.4         | (82632) | AATTC TGGACGAAAGGTTGTAAATCCTGATAC TGGTTTAGAAGAAAGATGTATTATATGACGTTCTGTA TAGTATCAACAGACCGAGATTCTTAAAGGA |       |       |       |       |       |       |       |       |       |       |
| SARS-CoV-2 NC_045512.2 | (1036)  | TAAAT TGGCAAAGAAATTTGACACCTC--AATGGG--GAATGTCCAAATTTTGATAT----TTCCTTAAATTCATATCAAGACTATTCAACCA         |       |       |       |       |       |       |       |       |       |       |
|                        |         | Section 863                                                                                            |       |       |       |       |       |       |       |       |       |       |
|                        |         | (82753)                                                                                                | 82753 | 82764 | 82775 | 82786 | 82797 | 82808 | 82819 | 82830 | 82848 |       |
| T4 NC_000866.4         | (82728) | ATTG--GTAAAGTTATTATTGGTCCATTGCTTTC TGGCGATGTATACAGAAAATGAAAACATT CAGCCGTATTACAGGC AACGATTTT AACAAATTAG |       |       |       |       |       |       |       |       |       |       |
| SARS-CoV-2 NC_045512.2 | (1124)  | AGGGTTGAAAAG---AAAAGCTTGTATGGCTTTATGGGTAGAAATTC-GAT---CTGTCTATC CAGTTGCGT-CACCA AATGAATGC AACCAAATGT   |       |       |       |       |       |       |       |       |       |       |
|                        |         | Section 864                                                                                            |       |       |       |       |       |       |       |       |       |       |
|                        |         | (82849)                                                                                                | 82849 | 82863 | 82874 | 82885 | 82896 | 82907 | 82918 | 82929 | 82944 |       |
| T4 NC_000866.4         | (82822) | CAAAATTCGTGATGGACGCGACAAATACTATGTTATC--GGTGA AATAAAT TATCCAGCTGATGTGATTTATTGGAATATCGCTAAAATT AATTTAAC  |       |       |       |       |       |       |       |       |       |       |
| SARS-CoV-2 NC_045512.2 | (1212)  | GCCTTTC AACTT-----CTCATGAAGTGTGATCATTGTG GTG-AAACTTCATGCGAGACGGC-----GATTTTGT TAAAGCCACTT-----         |       |       |       |       |       |       |       |       |       |       |
|                        |         | Section 865                                                                                            |       |       |       |       |       |       |       |       |       |       |
|                        |         | (82945)                                                                                                | 82945 | 82951 | 82962 | 82973 | 82984 | 82995 | 83006 | 83017 | 83028 | 83040 |
| T4 NC_000866.4         | (82916) | ATCTGAAAAA TTTGAAGTT CAGACCATTGAATTAATTCTGAC CCAACCGATGATGTTATCTTTACTCGCGATGGTT CACTGATTTGTATTGAAAA    |       |       |       |       |       |       |       |       |       |       |
| SARS-CoV-2 NC_045512.2 | (1287)  | ----GCGAAT TTTGTGCACTGAGAAATTGACTAAGAAGGTG CCACTACTTGTTGTTACTTA---CCCAAAATGCTGTTGTTAAATTTA----         |       |       |       |       |       |       |       |       |       |       |
|                        |         | Section 866                                                                                            |       |       |       |       |       |       |       |       |       |       |
|                        |         | (83041)                                                                                                | 83041 | 83050 | 83061 | 83072 | 83083 | 83094 | 83105 | 83116 | 83136 |       |
| T4 NC_000866.4         | (83012) | TGACTTACGTCCA CAATACTTAAC TATCGATTTGAGCCTATATCACAA--ATGACAGTA--AAAGCACCTTCAGTCACTAGTCTCAGAAATTTCCAA    |       |       |       |       |       |       |       |       |       |       |
| SARS-CoV-2 NC_045512.2 | (1372)  | ---T--T-GTCCA GCATG-----TCACAATT CAGAGTAGGACCTGAGCATAGTCTTGCCGAA TACAT-----AATGAATCTGCGTTGAAAA         |       |       |       |       |       |       |       |       |       |       |
|                        |         | Section 867                                                                                            |       |       |       |       |       |       |       |       |       |       |
|                        |         | (83137)                                                                                                | 83137 | 83149 | 83160 | 83171 | 83182 | 83193 | 83204 | 83215 | 83232 |       |
| T4 NC_000866.4         | (83104) | GTTATTCGCGCAAAATCAAGGTGCAAGTACGCTGGGATGACGTTGGTGCTAAATTTCTACTATTTTGTAGAAATCGCTGAGACAAAAACAACTCGGGGGA   |       |       |       |       |       |       |       |       |       |       |
| SARS-CoV-2 NC_045512.2 | (1449)  | CCATTCGTTCTAGAG-GGTGGTCCACATATTT----GCCTTTGGAGGCTGTGTGTTCTCTTATGTTGTTGTTGCCATTAACAAGTGTGCCTATTGGGTTCC  |       |       |       |       |       |       |       |       |       |       |
|                        |         | Section 868                                                                                            |       |       |       |       |       |       |       |       |       |       |
|                        |         | (83233)                                                                                                | 83233 | 83248 | 83259 | 83270 | 83281 | 83292 | 83303 | 83314 | 83328 |       |
| T4 NC_000866.4         | (83200) | AAATCTCCCGAGTAATCAATATCGTTGGATTAAATTTAGGATATACAGCAAAATAATAGTTTCTTTTATGATGATG--CTGATCCATTACAAATATAC     |       |       |       |       |       |       |       |       |       |       |
| SARS-CoV-2 NC_045512.2 | (1540)  | ACGTG---CTAGCGCTAACATAGGTTGTAACCATACAGGTGTTGTTGGAGAGGTTCCGAAGGTCTTAAATGACAACCTTCTTGAATACCTCCAAA        |       |       |       |       |       |       |       |       |       |       |

## SARS-CoV-2 &amp; T4.apr

|                        |         |                                                                                                       |       |       |       |       |       |       |       |       |             |
|------------------------|---------|-------------------------------------------------------------------------------------------------------|-------|-------|-------|-------|-------|-------|-------|-------|-------------|
|                        |         | Section 869                                                                                           |       |       |       |       |       |       |       |       |             |
|                        |         | (83329)                                                                                               | 83329 | 83336 | 83347 | 83358 | 83369 | 83380 | 83391 | 83402 | 83413 83424 |
| T4 NC 000866.4         | (83294) | A-TT---ATTAGAGTAGCCACAGCTGCGCAAGATTTTGAGCAGTCGTGATTGATTTATACCGAAGAGTTTGAAACTTTTGTACAAATGCTTATAC       |       |       |       |       |       |       |       |       |             |
| SARS-CoV-2 NC_045512.2 | (1633)  | AG-AGAAAGTCAAC--ATCAATATGTGGTGACTTTAACTTAAAGAT--CGCCATTATTGTGCATCTTTTCTGCTTCCA CAAGTGC                |       |       |       |       |       |       |       |       |             |
|                        |         | Section 870                                                                                           |       |       |       |       |       |       |       |       |             |
|                        |         | (83425)                                                                                               | 83425 | 83435 | 83446 | 83457 | 83468 | 83479 | 83490 | 83501 | 83520       |
| T4 NC 000866.4         | (83386) | ATTTCAAAACATGATTGAAATGCAATTAGCCAATAAAATTCAATCAGGA AAAATTTACTCTTAATAATTCTGATTATGTTAAATT TTAAT AATGATA- |       |       |       |       |       |       |       |       |             |
| SARS-CoV-2 NC_045512.2 | (1723)  | TFTTGTGGAAACTGTGAAAGGT---TTGGATTATAAAAG-CATTCA A--A---CAAATTGTTGAATCC TGTGTTAATT TTAAGTTACA AAGGAAA   |       |       |       |       |       |       |       |       |             |
|                        |         | Section 871                                                                                           |       |       |       |       |       |       |       |       |             |
|                        |         | (83521)                                                                                               | 83521 | 83534 | 83545 | 83556 | 83567 | 83578 | 83589 | 83600 | 83616       |
| T4 NC 000866.4         | (83481) | --CTATAATGCTGCAATTGATGAATGAATCAATTCCAATTTCAGCCATCGTATGTTGATGTTTC-ATCAATAAGTAATTTTATTATTGGTGA AAAATG   |       |       |       |       |       |       |       |       |             |
| SARS-CoV-2 NC_045512.2 | (1810)  | AGCTA AAAAGFGCTGGAATAATFGGTGAACAGAAATCAATAC TGAGTCC TCTTTATGCA TTTGCATCAGAGGCTGCTCGTGTGTGTACGATCAAT   |       |       |       |       |       |       |       |       |             |
|                        |         | Section 872                                                                                           |       |       |       |       |       |       |       |       |             |
|                        |         | (83617)                                                                                               | 83617 | 83622 | 83633 | 83644 | 83655 | 83666 | 83677 | 83688 | 83699 83712 |
| T4 NC 000866.4         | (83574) | AGTATCATGAAATACAAAGGTTCTATTCAGCAAGATTATGTTAAGGATATTAACCGAGTTTATTGTAT-GGAATCAGAAGGAATTCTATATCTTTT--TG  |       |       |       |       |       |       |       |       |             |
| SARS-CoV-2 NC_045512.2 | (1906)  | TTTCFCGCCGACT-CTTGAAACTGCTCA A-AAATCTGTGCGTGTTTTCAGAAAGGCCGCTATACAATACTAGATGGAATTTCACAGTATTCACCTG     |       |       |       |       |       |       |       |       |             |
|                        |         | Section 873                                                                                           |       |       |       |       |       |       |       |       |             |
|                        |         | (83713)                                                                                               | 83713 | 83721 | 83732 | 83743 | 83754 | 83765 | 83776 | 83787 | 83808       |
| T4 NC 000866.4         | (83667) | AGCGCTATCAACCTGTAGTTAAAGTATCAATGATAAAGGACAAACCTGGAAAGCTGTAAAGCTCTTCAATGACC GTGTAGGATATCCTTTATCTA      |       |       |       |       |       |       |       |       |             |
| SARS-CoV-2 NC_045512.2 | (2000)  | AGACTCATTG A--TGCTATGATGTTCAATCTGATTTGGCTACTAACAAATCTAGTTGTAAAGGCCTACATTACAGGTGGTGTGTGTCAGTTGACTT     |       |       |       |       |       |       |       |       |             |
|                        |         | Section 874                                                                                           |       |       |       |       |       |       |       |       |             |
|                        |         | (83809)                                                                                               | 83809 | 83820 | 83831 | 83842 | 83853 | 83864 | 83875 | 83886 | 83904       |
| T4 NC 000866.4         | (83763) | AGACAGTATATTACCAATCTGCGAACA CAACATACTGTCTAGGATACGACAAGATTTTCTATGGCCGCAATCTAC TGATGTTAGATGGTCAGCCG     |       |       |       |       |       |       |       |       |             |
| SARS-CoV-2 NC_045512.2 | (2094)  | CG-CAGTGGCTA ACTAA CAT-CTTTGGCA-----CTGTTTATGA AAAAC-----TCAAACCCGTCCTTGATTGGCTTGAAG--AGAAGTTT-AAGG   |       |       |       |       |       |       |       |       |             |
|                        |         | Section 875                                                                                           |       |       |       |       |       |       |       |       |             |
|                        |         | (83905)                                                                                               | 83905 | 83919 | 83930 | 83941 | 83952 | 83963 | 83974 | 83985 | 84000       |
| T4 NC 000866.4         | (83859) | ATGATGTCAGATTTAGTTCTCAGGATATAACAATTGCTAAACCTTGGCG-ACCAATTACATCTAGGATTTGATGTAGAAATTTTTCACCTTACGCG      |       |       |       |       |       |       |       |       |             |
| SARS-CoV-2 NC_045512.2 | (2175)  | AAGGTGTAGAGTTTCTTAGAGACGGTTGGGAAATTGTTAAATTTATCTCAACCTGTGCTTGTGAAATTGTCGTTGACAAATTT-GT CACCTGTGCA     |       |       |       |       |       |       |       |       |             |

## SARS-CoV-2 &amp; T4.apr

|                        |         |                                                                                                                                                                                                   |       |       |       |       |       |       |       |       |             |
|------------------------|---------|---------------------------------------------------------------------------------------------------------------------------------------------------------------------------------------------------|-------|-------|-------|-------|-------|-------|-------|-------|-------------|
|                        |         | Section 876                                                                                                                                                                                       |       |       |       |       |       |       |       |       |             |
|                        |         | (84001)                                                                                                                                                                                           | 84001 | 84007 | 84018 | 84029 | 84040 | 84051 | 84062 | 84073 | 84084 84096 |
| T4 NC 000866.4         | (83954) | A C T T T T A C C A G C G A A T - G T A T A C C G - C A T T G C A G A A G C T A T T A C T T G C A C C G - A T G A T T A C A T T T A C G T T G T C G C C A G A G A C A A A G T T A G A T A C A T A |       |       |       |       |       |       |       |       |             |
| SARS-CoV-2 NC_045512.2 | (2270)  | A A G G A A A T T A A G A G A G T G T C A G A C A T T C T T T A A G C T T G T A A A T A A A T T T T T G C T T T G - T G T G - - C T G A C T C T A T C A T T A T T G T G A G C T A A A             |       |       |       |       |       |       |       |       |             |
|                        |         | Section 877                                                                                                                                                                                       |       |       |       |       |       |       |       |       |             |
|                        |         | (84097)                                                                                                                                                                                           | 84097 | 84106 | 84117 | 84128 | 84139 | 84150 | 84161 | 84172 | 84192       |
| T4 NC 000866.4         | (84047) | A A A A C - G A G T A A T G C A C T T A - - T A G A T T T T G A T C C A T T A T C T C C A A - - - C A T A T T C G G A A A G A C T T T T T G A A C C T G A T A C C A T G A C T A T A A C C G G A   |       |       |       |       |       |       |       |       |             |
| SARS-CoV-2 NC_045512.2 | (2363)  | C T T A A A G C C T - - T G A A T T T A G G T G A A A C A T T T G T C A C G C A C T C A A A G G G A T T G T A C A G A A A G T G T T T A A T C C A G A G A A A A A - C T G G C C T A C T C         |       |       |       |       |       |       |       |       |             |
|                        |         | Section 878                                                                                                                                                                                       |       |       |       |       |       |       |       |       |             |
|                        |         | (84193)                                                                                                                                                                                           | 84193 | 84205 | 84216 | 84227 | 84238 | 84249 | 84260 | 84271 | 84288       |
| T4 NC 000866.4         | (84137) | A A T C C - - - T A A A G C A G T A T G C T A T A A A A T G G A T T C T A T C T G T G A T A A A G T T T T G C T C T T A - - - - T T A T T - G G T G A A G T T G A A A C A T T A A T G C T A       |       |       |       |       |       |       |       |       |             |
| SARS-CoV-2 NC_045512.2 | (2456)  | A T G C C T C T A A A A G C C C A A A - - A G A A A T T A T C T T C T T A G A G G A G A A A C A C T T C C C A C A G A A A G T G T T A C A G A G A A G T T G T C T T G A A A A C T G G T G         |       |       |       |       |       |       |       |       |             |
|                        |         | Section 879                                                                                                                                                                                       |       |       |       |       |       |       |       |       |             |
|                        |         | (84289)                                                                                                                                                                                           | 84289 | 84304 | 84315 | 84326 | 84337 | 84348 | 84359 | 84370 | 84384       |
| T4 NC 000866.4         | (84225) | A T C C T A G A A C A T C A - A - - A A A T A A T T G A T T C C G C T G A T A A A G G A A T A T A T G T T T A A A T C A T G A C G A A A A A C A T G G A A A A G A G T T T T T G G T A A T A       |       |       |       |       |       |       |       |       |             |
| SARS-CoV-2 NC_045512.2 | (2550)  | A T T T A C A A C A T T A G A A C A A C C T A C T A G T G A A G C T G T T G A A G C T C C A T T G T T G G T A C A C A G T T T G T A T T A A C G G C T T A - - - - T G T T G C T C G A A           |       |       |       |       |       |       |       |       |             |
|                        |         | Section 880                                                                                                                                                                                       |       |       |       |       |       |       |       |       |             |
|                        |         | (84385)                                                                                                                                                                                           | 84385 | 84392 | 84403 | 84414 | 84425 | 84436 | 84447 | 84458 | 84469 84480 |
| T4 NC 000866.4         | (84318) | C C G A A G A A G A A A G A A G A C G T A T T C A A C C C - - G G A T A T G C G A A T A T G T C A A C T G A C G G T A A A T T A G T T T C T C T G T C T T C G A G T A A T T T T A A A - - - - T   |       |       |       |       |       |       |       |       |             |
| SARS-CoV-2 NC_045512.2 | (2642)  | A T C A A A G A C A C A G A A A A - G T A C T G T G C C C T T G C A C C T A A T A T G A T G T A A C A A A C A A T A C C T T C A C A - C T C A A A G G C G T G C A C C A A C A A A G G T T A       |       |       |       |       |       |       |       |       |             |
|                        |         | Section 881                                                                                                                                                                                       |       |       |       |       |       |       |       |       |             |
|                        |         | (84481)                                                                                                                                                                                           | 84481 | 84491 | 84502 | 84513 | 84524 | 84535 | 84546 | 84557 | 84576       |
| T4 NC 000866.4         | (84408) | T T T T A A G T G A T A A T G T T G T T A A T G A C C C T G - A A A C - T G C A G C A A A - - - - A T A T C A G T T A A T T G G C G C T G T T A - - A A T A T G A A T T T C C T C G T G A A T G   |       |       |       |       |       |       |       |       |             |
| SARS-CoV-2 NC_045512.2 | (2736)  | C T T T T G T G T G A T G A C A C T G T G A T A G A A G - T G C A A G G T T A C A A G A G T G T G A A T A T C A C T T - - T T G A A C T T G A T G A A A G G A T T G A T A A A G T A C T T A A T G |       |       |       |       |       |       |       |       |             |
|                        |         | Section 882                                                                                                                                                                                       |       |       |       |       |       |       |       |       |             |
|                        |         | (84577)                                                                                                                                                                                           | 84577 | 84590 | 84601 | 84612 | 84623 | 84634 | 84645 | 84656 | 84672       |
| T4 NC 000866.4         | (84496) | G T T A G C T G A T A A G C A T T A T C A T A T G A T G G C A T T - - T A T A G C G G A T G A A A C A T C - - - T G A T T G G G A G A C T T T T A C T C C T C A A C C A A T G A A A T A C T A C   |       |       |       |       |       |       |       |       |             |
| SARS-CoV-2 NC_045512.2 | (2829)  | A G A A G - T G C T C T G C C T A T A C A G T T G A A C T C G G T A C A G A A G T A A A T G A G T T C G C C T G T G T T G T G G C A G A T G C T G T C A T A A A A C C T T T G C A A C C A G T A   |       |       |       |       |       |       |       |       |             |

## SARS-CoV-2 & T4.apr

[illegible]

## SARS-CoV-2 &amp; T4.apr

|                        |         |             |       |       |       |        |       |       |       |       |       |       |     |       |     |     |     |    |        |     |    |    |      |     |    |    |    |     |     |    |      |     |     |     |     |     |     |     |     |     |     |     |      |    |    |       |     |    |    |   |   |   |   |   |   |   |   |  |  |  |  |  |  |  |  |  |  |  |  |  |  |  |  |  |  |  |  |  |  |  |  |  |  |  |  |  |  |  |  |  |  |  |  |  |  |  |  |  |  |  |  |  |  |  |  |  |  |  |  |  |  |  |  |  |  |  |  |  |  |  |  |  |  |  |  |  |  |  |  |  |  |  |  |  |  |  |  |  |  |  |  |  |  |  |  |  |  |  |  |  |  |  |  |  |  |  |  |  |  |  |  |  |  |  |  |  |  |  |  |  |  |  |  |  |  |  |  |  |  |  |  |  |  |  |  |  |  |  |  |  |  |  |  |  |  |  |  |  |  |  |  |  |  |  |  |  |  |  |  |  |  |  |  |  |  |  |  |  |  |  |  |  |  |  |  |  |  |  |  |  |  |  |  |  |  |  |  |  |  |  |  |  |  |  |  |  |  |  |  |  |  |  |  |  |  |  |  |  |  |  |  |  |  |  |  |  |  |  |  |  |  |  |  |  |  |  |  |  |  |  |  |  |  |  |  |  |  |  |  |  |  |  |  |  |  |  |  |  |  |  |  |  |  |  |  |  |  |  |  |  |  |  |  |  |  |  |  |  |  |  |  |  |  |  |  |  |  |  |  |  |  |  |  |  |  |  |  |  |  |  |  |  |  |  |  |  |  |  |  |  |  |  |  |  |  |  |  |  |  |  |  |  |  |  |  |  |  |  |  |  |  |  |  |  |  |  |  |  |  |  |  |  |  |  |  |  |  |  |  |  |  |  |  |  |  |  |  |  |  |  |  |  |  |  |  |  |  |  |  |  |  |  |  |  |  |  |  |  |  |  |  |  |  |  |  |  |  |  |  |  |  |  |  |  |  |  |  |  |  |  |  |  |  |  |  |  |  |  |  |  |  |  |  |  |  |  |  |  |  |  |  |  |  |  |  |  |  |  |  |  |  |  |  |  |  |  |  |  |  |  |  |  |  |  |  |  |  |  |  |  |  |  |  |  |  |  |  |  |  |  |  |  |  |  |  |  |  |  |  |  |  |  |  |  |  |  |  |  |  |  |  |  |  |  |  |  |  |  |  |  |  |  |  |  |  |  |  |  |  |  |  |  |  |  |  |  |  |  |  |  |  |  |  |  |  |  |  |  |  |  |  |  |  |  |  |  |  |  |  |  |  |  |  |  |  |  |  |  |  |  |  |  |  |  |  |  |  |  |  |  |  |  |  |  |  |  |  |  |  |  |  |  |  |  |  |  |  |  |  |  |  |  |  |  |  |  |  |  |  |  |  |  |  |  |  |  |  |  |  |  |  |  |  |  |  |  |  |  |  |  |  |  |  |  |  |  |  |  |  |  |  |  |  |  |  |  |  |  |  |  |  |  |  |  |  |  |  |  |  |  |  |  |  |  |  |  |  |  |  |  |  |  |  |  |  |  |  |  |  |  |  |  |  |  |  |  |  |  |  |  |  |  |  |  |  |  |  |  |  |  |  |  |  |  |  |  |  |  |  |  |  |  |  |  |  |  |  |  |  |  |  |  |  |  |  |  |  |  |  |  |  |  |  |  |  |  |  |  |  |  |  |  |  |  |  |  |  |  |  |  |  |  |  |  |  |  |  |  |  |  |  |  |  |  |  |  |  |  |  |  |  |  |  |  |  |  |  |  |  |  |  |  |  |  |  |  |  |  |  |  |  |  |  |  |  |  |  |  |  |  |  |  |  |  |  |  |  |  |  |  |  |  |  |  |  |  |  |  |  |  |  |  |  |  |  |  |  |  |  |  |  |  |  |  |  |  |  |  |  |  |  |  |  |  |  |  |  |  |  |  |  |  |  |  |  |  |  |  |  |  |  |  |  |  |  |  |  |  |  |  |  |  |  |  |  |  |  |  |  |  |  |  |  |  |  |  |  |  |  |  |  |  |  |  |  |  |  |  |  |  |  |  |  |  |  |  |  |  |  |  |  |  |  |  |  |  |  |  |  |  |  |  |  |  |  |  |  |  |  |  |  |  |  |  |  |  |  |  |  |  |  |  |  |  |  |  |  |  |  |  |  |  |  |  |  |  |  |  |  |  |  |  |  |  |  |  |  |  |  |  |  |  |  |  |  |  |  |  |  |  |  |  |  |  |  |  |  |  |  |  |  |  |  |  |  |  |  |  |  |  |  |  |  |  |  |  |  |  |  |  |  |  |  |  |  |    |
|------------------------|---------|-------------|-------|-------|-------|--------|-------|-------|-------|-------|-------|-------|-----|-------|-----|-----|-----|----|--------|-----|----|----|------|-----|----|----|----|-----|-----|----|------|-----|-----|-----|-----|-----|-----|-----|-----|-----|-----|-----|------|----|----|-------|-----|----|----|---|---|---|---|---|---|---|---|--|--|--|--|--|--|--|--|--|--|--|--|--|--|--|--|--|--|--|--|--|--|--|--|--|--|--|--|--|--|--|--|--|--|--|--|--|--|--|--|--|--|--|--|--|--|--|--|--|--|--|--|--|--|--|--|--|--|--|--|--|--|--|--|--|--|--|--|--|--|--|--|--|--|--|--|--|--|--|--|--|--|--|--|--|--|--|--|--|--|--|--|--|--|--|--|--|--|--|--|--|--|--|--|--|--|--|--|--|--|--|--|--|--|--|--|--|--|--|--|--|--|--|--|--|--|--|--|--|--|--|--|--|--|--|--|--|--|--|--|--|--|--|--|--|--|--|--|--|--|--|--|--|--|--|--|--|--|--|--|--|--|--|--|--|--|--|--|--|--|--|--|--|--|--|--|--|--|--|--|--|--|--|--|--|--|--|--|--|--|--|--|--|--|--|--|--|--|--|--|--|--|--|--|--|--|--|--|--|--|--|--|--|--|--|--|--|--|--|--|--|--|--|--|--|--|--|--|--|--|--|--|--|--|--|--|--|--|--|--|--|--|--|--|--|--|--|--|--|--|--|--|--|--|--|--|--|--|--|--|--|--|--|--|--|--|--|--|--|--|--|--|--|--|--|--|--|--|--|--|--|--|--|--|--|--|--|--|--|--|--|--|--|--|--|--|--|--|--|--|--|--|--|--|--|--|--|--|--|--|--|--|--|--|--|--|--|--|--|--|--|--|--|--|--|--|--|--|--|--|--|--|--|--|--|--|--|--|--|--|--|--|--|--|--|--|--|--|--|--|--|--|--|--|--|--|--|--|--|--|--|--|--|--|--|--|--|--|--|--|--|--|--|--|--|--|--|--|--|--|--|--|--|--|--|--|--|--|--|--|--|--|--|--|--|--|--|--|--|--|--|--|--|--|--|--|--|--|--|--|--|--|--|--|--|--|--|--|--|--|--|--|--|--|--|--|--|--|--|--|--|--|--|--|--|--|--|--|--|--|--|--|--|--|--|--|--|--|--|--|--|--|--|--|--|--|--|--|--|--|--|--|--|--|--|--|--|--|--|--|--|--|--|--|--|--|--|--|--|--|--|--|--|--|--|--|--|--|--|--|--|--|--|--|--|--|--|--|--|--|--|--|--|--|--|--|--|--|--|--|--|--|--|--|--|--|--|--|--|--|--|--|--|--|--|--|--|--|--|--|--|--|--|--|--|--|--|--|--|--|--|--|--|--|--|--|--|--|--|--|--|--|--|--|--|--|--|--|--|--|--|--|--|--|--|--|--|--|--|--|--|--|--|--|--|--|--|--|--|--|--|--|--|--|--|--|--|--|--|--|--|--|--|--|--|--|--|--|--|--|--|--|--|--|--|--|--|--|--|--|--|--|--|--|--|--|--|--|--|--|--|--|--|--|--|--|--|--|--|--|--|--|--|--|--|--|--|--|--|--|--|--|--|--|--|--|--|--|--|--|--|--|--|--|--|--|--|--|--|--|--|--|--|--|--|--|--|--|--|--|--|--|--|--|--|--|--|--|--|--|--|--|--|--|--|--|--|--|--|--|--|--|--|--|--|--|--|--|--|--|--|--|--|--|--|--|--|--|--|--|--|--|--|--|--|--|--|--|--|--|--|--|--|--|--|--|--|--|--|--|--|--|--|--|--|--|--|--|--|--|--|--|--|--|--|--|--|--|--|--|--|--|--|--|--|--|--|--|--|--|--|--|--|--|--|--|--|--|--|--|--|--|--|--|--|--|--|--|--|--|--|--|--|--|--|--|--|--|--|--|--|--|--|--|--|--|--|--|--|--|--|--|--|--|--|--|--|--|--|--|--|--|--|--|--|--|--|--|--|--|--|--|--|--|--|--|--|--|--|--|--|--|--|--|--|--|--|--|--|--|--|--|--|--|--|--|--|--|--|--|--|--|--|--|--|--|--|--|--|--|--|--|--|--|--|--|--|--|--|--|--|--|--|--|--|--|--|--|--|--|--|--|--|--|--|--|--|--|--|--|--|--|--|--|--|--|--|--|--|--|--|--|--|--|--|--|--|--|--|--|--|--|--|--|--|--|--|--|--|--|--|--|--|--|--|--|--|--|--|--|--|--|--|--|--|--|--|--|--|--|--|--|--|--|--|--|--|--|--|--|--|--|--|--|--|--|--|--|--|--|--|--|--|--|--|--|--|--|----|
|                        |         | Section 890 |       |       |       |        |       |       |       |       |       |       |     |       |     |     |     |    |        |     |    |    |      |     |    |    |    |     |     |    |      |     |     |     |     |     |     |     |     |     |     |     |      |    |    |       |     |    |    |   |   |   |   |   |   |   |   |  |  |  |  |  |  |  |  |  |  |  |  |  |  |  |  |  |  |  |  |  |  |  |  |  |  |  |  |  |  |  |  |  |  |  |  |  |  |  |  |  |  |  |  |  |  |  |  |  |  |  |  |  |  |  |  |  |  |  |  |  |  |  |  |  |  |  |  |  |  |  |  |  |  |  |  |  |  |  |  |  |  |  |  |  |  |  |  |  |  |  |  |  |  |  |  |  |  |  |  |  |  |  |  |  |  |  |  |  |  |  |  |  |  |  |  |  |  |  |  |  |  |  |  |  |  |  |  |  |  |  |  |  |  |  |  |  |  |  |  |  |  |  |  |  |  |  |  |  |  |  |  |  |  |  |  |  |  |  |  |  |  |  |  |  |  |  |  |  |  |  |  |  |  |  |  |  |  |  |  |  |  |  |  |  |  |  |  |  |  |  |  |  |  |  |  |  |  |  |  |  |  |  |  |  |  |  |  |  |  |  |  |  |  |  |  |  |  |  |  |  |  |  |  |  |  |  |  |  |  |  |  |  |  |  |  |  |  |  |  |  |  |  |  |  |  |  |  |  |  |  |  |  |  |  |  |  |  |  |  |  |  |  |  |  |  |  |  |  |  |  |  |  |  |  |  |  |  |  |  |  |  |  |  |  |  |  |  |  |  |  |  |  |  |  |  |  |  |  |  |  |  |  |  |  |  |  |  |  |  |  |  |  |  |  |  |  |  |  |  |  |  |  |  |  |  |  |  |  |  |  |  |  |  |  |  |  |  |  |  |  |  |  |  |  |  |  |  |  |  |  |  |  |  |  |  |  |  |  |  |  |  |  |  |  |  |  |  |  |  |  |  |  |  |  |  |  |  |  |  |  |  |  |  |  |  |  |  |  |  |  |  |  |  |  |  |  |  |  |  |  |  |  |  |  |  |  |  |  |  |  |  |  |  |  |  |  |  |  |  |  |  |  |  |  |  |  |  |  |  |  |  |  |  |  |  |  |  |  |  |  |  |  |  |  |  |  |  |  |  |  |  |  |  |  |  |  |  |  |  |  |  |  |  |  |  |  |  |  |  |  |  |  |  |  |  |  |  |  |  |  |  |  |  |  |  |  |  |  |  |  |  |  |  |  |  |  |  |  |  |  |  |  |  |  |  |  |  |  |  |  |  |  |  |  |  |  |  |  |  |  |  |  |  |  |  |  |  |  |  |  |  |  |  |  |  |  |  |  |  |  |  |  |  |  |  |  |  |  |  |  |  |  |  |  |  |  |  |  |  |  |  |  |  |  |  |  |  |  |  |  |  |  |  |  |  |  |  |  |  |  |  |  |  |  |  |  |  |  |  |  |  |  |  |  |  |  |  |  |  |  |  |  |  |  |  |  |  |  |  |  |  |  |  |  |  |  |  |  |  |  |  |  |  |  |  |  |  |  |  |  |  |  |  |  |  |  |  |  |  |  |  |  |  |  |  |  |  |  |  |  |  |  |  |  |  |  |  |  |  |  |  |  |  |  |  |  |  |  |  |  |  |  |  |  |  |  |  |  |  |  |  |  |  |  |  |  |  |  |  |  |  |  |  |  |  |  |  |  |  |  |  |  |  |  |  |  |  |  |  |  |  |  |  |  |  |  |  |  |  |  |  |  |  |  |  |  |  |  |  |  |  |  |  |  |  |  |  |  |  |  |  |  |  |  |  |  |  |  |  |  |  |  |  |  |  |  |  |  |  |  |  |  |  |  |  |  |  |  |  |  |  |  |  |  |  |  |  |  |  |  |  |  |  |  |  |  |  |  |  |  |  |  |  |  |  |  |  |  |  |  |  |  |  |  |  |  |  |  |  |  |  |  |  |  |  |  |  |  |  |  |  |  |  |  |  |  |  |  |  |  |  |  |  |  |  |  |  |  |  |  |  |  |  |  |  |  |  |  |  |  |  |  |  |  |  |  |  |  |  |  |  |  |  |  |  |  |  |  |  |  |  |  |  |  |  |  |  |  |  |  |  |  |  |  |  |  |  |  |  |  |  |  |  |  |  |  |  |  |  |  |  |  |  |  |  |  |  |  |  |  |  |  |  |  |  |  |  |  |  |  |  |  |  |  |  |  |  |  |  |  |  |  |  |  |  |  |  |  |  |  |  |  |  |  |  |  |  |  |  |  |  |  |  |  |  |  |  |  |  |  |  |  |  |  |  |  |  |    |
|                        |         | (85345)     | 85345 | 85360 | 85371 | 85382  | 85393 | 85404 | 85415 | 85426 | 85440 |       |     |       |     |     |     |    |        |     |    |    |      |     |    |    |    |     |     |    |      |     |     |     |     |     |     |     |     |     |     |     |      |    |    |       |     |    |    |   |   |   |   |   |   |   |   |  |  |  |  |  |  |  |  |  |  |  |  |  |  |  |  |  |  |  |  |  |  |  |  |  |  |  |  |  |  |  |  |  |  |  |  |  |  |  |  |  |  |  |  |  |  |  |  |  |  |  |  |  |  |  |  |  |  |  |  |  |  |  |  |  |  |  |  |  |  |  |  |  |  |  |  |  |  |  |  |  |  |  |  |  |  |  |  |  |  |  |  |  |  |  |  |  |  |  |  |  |  |  |  |  |  |  |  |  |  |  |  |  |  |  |  |  |  |  |  |  |  |  |  |  |  |  |  |  |  |  |  |  |  |  |  |  |  |  |  |  |  |  |  |  |  |  |  |  |  |  |  |  |  |  |  |  |  |  |  |  |  |  |  |  |  |  |  |  |  |  |  |  |  |  |  |  |  |  |  |  |  |  |  |  |  |  |  |  |  |  |  |  |  |  |  |  |  |  |  |  |  |  |  |  |  |  |  |  |  |  |  |  |  |  |  |  |  |  |  |  |  |  |  |  |  |  |  |  |  |  |  |  |  |  |  |  |  |  |  |  |  |  |  |  |  |  |  |  |  |  |  |  |  |  |  |  |  |  |  |  |  |  |  |  |  |  |  |  |  |  |  |  |  |  |  |  |  |  |  |  |  |  |  |  |  |  |  |  |  |  |  |  |  |  |  |  |  |  |  |  |  |  |  |  |  |  |  |  |  |  |  |  |  |  |  |  |  |  |  |  |  |  |  |  |  |  |  |  |  |  |  |  |  |  |  |  |  |  |  |  |  |  |  |  |  |  |  |  |  |  |  |  |  |  |  |  |  |  |  |  |  |  |  |  |  |  |  |  |  |  |  |  |  |  |  |  |  |  |  |  |  |  |  |  |  |  |  |  |  |  |  |  |  |  |  |  |  |  |  |  |  |  |  |  |  |  |  |  |  |  |  |  |  |  |  |  |  |  |  |  |  |  |  |  |  |  |  |  |  |  |  |  |  |  |  |  |  |  |  |  |  |  |  |  |  |  |  |  |  |  |  |  |  |  |  |  |  |  |  |  |  |  |  |  |  |  |  |  |  |  |  |  |  |  |  |  |  |  |  |  |  |  |  |  |  |  |  |  |  |  |  |  |  |  |  |  |  |  |  |  |  |  |  |  |  |  |  |  |  |  |  |  |  |  |  |  |  |  |  |  |  |  |  |  |  |  |  |  |  |  |  |  |  |  |  |  |  |  |  |  |  |  |  |  |  |  |  |  |  |  |  |  |  |  |  |  |  |  |  |  |  |  |  |  |  |  |  |  |  |  |  |  |  |  |  |  |  |  |  |  |  |  |  |  |  |  |  |  |  |  |  |  |  |  |  |  |  |  |  |  |  |  |  |  |  |  |  |  |  |  |  |  |  |  |  |  |  |  |  |  |  |  |  |  |  |  |  |  |  |  |  |  |  |  |  |  |  |  |  |  |  |  |  |  |  |  |  |  |  |  |  |  |  |  |  |  |  |  |  |  |  |  |  |  |  |  |  |  |  |  |  |  |  |  |  |  |  |  |  |  |  |  |  |  |  |  |  |  |  |  |  |  |  |  |  |  |  |  |  |  |  |  |  |  |  |  |  |  |  |  |  |  |  |  |  |  |  |  |  |  |  |  |  |  |  |  |  |  |  |  |  |  |  |  |  |  |  |  |  |  |  |  |  |  |  |  |  |  |  |  |  |  |  |  |  |  |  |  |  |  |  |  |  |  |  |  |  |  |  |  |  |  |  |  |  |  |  |  |  |  |  |  |  |  |  |  |  |  |  |  |  |  |  |  |  |  |  |  |  |  |  |  |  |  |  |  |  |  |  |  |  |  |  |  |  |  |  |  |  |  |  |  |  |  |  |  |  |  |  |  |  |  |  |  |  |  |  |  |  |  |  |  |  |  |  |  |  |  |  |  |  |  |  |  |  |  |  |  |  |  |  |  |  |  |  |  |  |  |  |  |  |  |  |  |  |  |  |  |  |  |  |  |  |  |  |  |  |  |  |  |  |  |  |  |  |  |  |  |  |  |  |  |  |  |  |  |  |  |  |  |  |  |  |  |  |  |  |  |  |  |  |  |  |  |  |  |  |  |  |  |  |  |  |  |  |  |  |  |  |  |  |  |  |  |  |  |  |  |  |  |  |  |  |  |  |  |  |  |  |  |  |  |  |  |  |  |  |    |
| T4 NC_000866.4         | (85241) | G           | AAT   | TCAC  | GT    | AGC-TA | TG    | AT    | TTTTA | -TTCT | AC    | TAA   | GG  | AAT-T | G   | AA  | GCA | T  | CATACA | AG  | TT | CT | TTTT | TAA | AG | T  | CT | TTT | ATA | AA | ---  | TGA | AGA | AG  | TT  | GAA |     |     |     |     |     |     |      |    |    |       |     |    |    |   |   |   |   |   |   |   |   |  |  |  |  |  |  |  |  |  |  |  |  |  |  |  |  |  |  |  |  |  |  |  |  |  |  |  |  |  |  |  |  |  |  |  |  |  |  |  |  |  |  |  |  |  |  |  |  |  |  |  |  |  |  |  |  |  |  |  |  |  |  |  |  |  |  |  |  |  |  |  |  |  |  |  |  |  |  |  |  |  |  |  |  |  |  |  |  |  |  |  |  |  |  |  |  |  |  |  |  |  |  |  |  |  |  |  |  |  |  |  |  |  |  |  |  |  |  |  |  |  |  |  |  |  |  |  |  |  |  |  |  |  |  |  |  |  |  |  |  |  |  |  |  |  |  |  |  |  |  |  |  |  |  |  |  |  |  |  |  |  |  |  |  |  |  |  |  |  |  |  |  |  |  |  |  |  |  |  |  |  |  |  |  |  |  |  |  |  |  |  |  |  |  |  |  |  |  |  |  |  |  |  |  |  |  |  |  |  |  |  |  |  |  |  |  |  |  |  |  |  |  |  |  |  |  |  |  |  |  |  |  |  |  |  |  |  |  |  |  |  |  |  |  |  |  |  |  |  |  |  |  |  |  |  |  |  |  |  |  |  |  |  |  |  |  |  |  |  |  |  |  |  |  |  |  |  |  |  |  |  |  |  |  |  |  |  |  |  |  |  |  |  |  |  |  |  |  |  |  |  |  |  |  |  |  |  |  |  |  |  |  |  |  |  |  |  |  |  |  |  |  |  |  |  |  |  |  |  |  |  |  |  |  |  |  |  |  |  |  |  |  |  |  |  |  |  |  |  |  |  |  |  |  |  |  |  |  |  |  |  |  |  |  |  |  |  |  |  |  |  |  |  |  |  |  |  |  |  |  |  |  |  |  |  |  |  |  |  |  |  |  |  |  |  |  |  |  |  |  |  |  |  |  |  |  |  |  |  |  |  |  |  |  |  |  |  |  |  |  |  |  |  |  |  |  |  |  |  |  |  |  |  |  |  |  |  |  |  |  |  |  |  |  |  |  |  |  |  |  |  |  |  |  |  |  |  |  |  |  |  |  |  |  |  |  |  |  |  |  |  |  |  |  |  |  |  |  |  |  |  |  |  |  |  |  |  |  |  |  |  |  |  |  |  |  |  |  |  |  |  |  |  |  |  |  |  |  |  |  |  |  |  |  |  |  |  |  |  |  |  |  |  |  |  |  |  |  |  |  |  |  |  |  |  |  |  |  |  |  |  |  |  |  |  |  |  |  |  |  |  |  |  |  |  |  |  |  |  |  |  |  |  |  |  |  |  |  |  |  |  |  |  |  |  |  |  |  |  |  |  |  |  |  |  |  |  |  |  |  |  |  |  |  |  |  |  |  |  |  |  |  |  |  |  |  |  |  |  |  |  |  |  |  |  |  |  |  |  |  |  |  |  |  |  |  |  |  |  |  |  |  |  |  |  |  |  |  |  |  |  |  |  |  |  |  |  |  |  |  |  |  |  |  |  |  |  |  |  |  |  |  |  |  |  |  |  |  |  |  |  |  |  |  |  |  |  |  |  |  |  |  |  |  |  |  |  |  |  |  |  |  |  |  |  |  |  |  |  |  |  |  |  |  |  |  |  |  |  |  |  |  |  |  |  |  |  |  |  |  |  |  |  |  |  |  |  |  |  |  |  |  |  |  |  |  |  |  |  |  |  |  |  |  |  |  |  |  |  |  |  |  |  |  |  |  |  |  |  |  |  |  |  |  |  |  |  |  |  |  |  |  |  |  |  |  |  |  |  |  |  |  |  |  |  |  |  |  |  |  |  |  |  |  |  |  |  |  |  |  |  |  |  |  |  |  |  |  |  |  |  |  |  |  |  |  |  |  |  |  |  |  |  |  |  |  |  |  |  |  |  |  |  |  |  |  |  |  |  |  |  |  |  |  |  |  |  |  |  |  |  |  |  |  |  |  |  |  |  |  |  |  |  |  |  |  |  |  |  |  |  |  |  |  |  |  |  |  |  |  |  |  |  |  |  |  |  |  |  |  |  |  |  |  |  |  |  |  |  |  |  |  |  |  |  |  |  |  |  |  |  |  |  |  |  |  |  |  |  |  |  |  |  |  |  |  |  |  |  |  |  |  |  |  |  |  |  |  |  |  |  |  |  |  |  |  |  |  |  |  |  |  |  |  |  |  |  |  |  |  |  |  |  |  |  |  |  |  |    |
| SARS-CoV-2 NC_045512.2 | (3557)  | A           | AA    | G     | TGG   | GT     | G     | TAGT  | TG    | TG    | TTTTA | AG    | CGG | AC    | AC  | AA  | T   | CT | TGC    | TAA | CA | C  | T    | GT  | CT | T  | C  | ATG | TT  | G  | TC   | GG  | CCC | AA  | A   | TG  | TTA | AC  | AA  | AGG | TGA | AGA | CA   | TT | C  | AA    |     |    |    |   |   |   |   |   |   |   |   |  |  |  |  |  |  |  |  |  |  |  |  |  |  |  |  |  |  |  |  |  |  |  |  |  |  |  |  |  |  |  |  |  |  |  |  |  |  |  |  |  |  |  |  |  |  |  |  |  |  |  |  |  |  |  |  |  |  |  |  |  |  |  |  |  |  |  |  |  |  |  |  |  |  |  |  |  |  |  |  |  |  |  |  |  |  |  |  |  |  |  |  |  |  |  |  |  |  |  |  |  |  |  |  |  |  |  |  |  |  |  |  |  |  |  |  |  |  |  |  |  |  |  |  |  |  |  |  |  |  |  |  |  |  |  |  |  |  |  |  |  |  |  |  |  |  |  |  |  |  |  |  |  |  |  |  |  |  |  |  |  |  |  |  |  |  |  |  |  |  |  |  |  |  |  |  |  |  |  |  |  |  |  |  |  |  |  |  |  |  |  |  |  |  |  |  |  |  |  |  |  |  |  |  |  |  |  |  |  |  |  |  |  |  |  |  |  |  |  |  |  |  |  |  |  |  |  |  |  |  |  |  |  |  |  |  |  |  |  |  |  |  |  |  |  |  |  |  |  |  |  |  |  |  |  |  |  |  |  |  |  |  |  |  |  |  |  |  |  |  |  |  |  |  |  |  |  |  |  |  |  |  |  |  |  |  |  |  |  |  |  |  |  |  |  |  |  |  |  |  |  |  |  |  |  |  |  |  |  |  |  |  |  |  |  |  |  |  |  |  |  |  |  |  |  |  |  |  |  |  |  |  |  |  |  |  |  |  |  |  |  |  |  |  |  |  |  |  |  |  |  |  |  |  |  |  |  |  |  |  |  |  |  |  |  |  |  |  |  |  |  |  |  |  |  |  |  |  |  |  |  |  |  |  |  |  |  |  |  |  |  |  |  |  |  |  |  |  |  |  |  |  |  |  |  |  |  |  |  |  |  |  |  |  |  |  |  |  |  |  |  |  |  |  |  |  |  |  |  |  |  |  |  |  |  |  |  |  |  |  |  |  |  |  |  |  |  |  |  |  |  |  |  |  |  |  |  |  |  |  |  |  |  |  |  |  |  |  |  |  |  |  |  |  |  |  |  |  |  |  |  |  |  |  |  |  |  |  |  |  |  |  |  |  |  |  |  |  |  |  |  |  |  |  |  |  |  |  |  |  |  |  |  |  |  |  |  |  |  |  |  |  |  |  |  |  |  |  |  |  |  |  |  |  |  |  |  |  |  |  |  |  |  |  |  |  |  |  |  |  |  |  |  |  |  |  |  |  |  |  |  |  |  |  |  |  |  |  |  |  |  |  |  |  |  |  |  |  |  |  |  |  |  |  |  |  |  |  |  |  |  |  |  |  |  |  |  |  |  |  |  |  |  |  |  |  |  |  |  |  |  |  |  |  |  |  |  |  |  |  |  |  |  |  |  |  |  |  |  |  |  |  |  |  |  |  |  |  |  |  |  |  |  |  |  |  |  |  |  |  |  |  |  |  |  |  |  |  |  |  |  |  |  |  |  |  |  |  |  |  |  |  |  |  |  |  |  |  |  |  |  |  |  |  |  |  |  |  |  |  |  |  |  |  |  |  |  |  |  |  |  |  |  |  |  |  |  |  |  |  |  |  |  |  |  |  |  |  |  |  |  |  |  |  |  |  |  |  |  |  |  |  |  |  |  |  |  |  |  |  |  |  |  |  |  |  |  |  |  |  |  |  |  |  |  |  |  |  |  |  |  |  |  |  |  |  |  |  |  |  |  |  |  |  |  |  |  |  |  |  |  |  |  |  |  |  |  |  |  |  |  |  |  |  |  |  |  |  |  |  |  |  |  |  |  |  |  |  |  |  |  |  |  |  |  |  |  |  |  |  |  |  |  |  |  |  |  |  |  |  |  |  |  |  |  |  |  |  |  |  |  |  |  |  |  |  |  |  |  |  |  |  |  |  |  |  |  |  |  |  |  |  |  |  |  |  |  |  |  |  |  |  |  |  |  |  |  |  |  |  |  |  |  |  |  |  |  |  |  |  |  |  |  |  |  |  |  |  |  |  |  |  |  |  |  |  |  |  |  |  |  |  |  |  |  |  |  |  |  |  |  |  |  |  |  |  |  |  |  |  |  |  |  |  |  |  |  |  |  |  |  |  |  |  |  |  |  |  |  |  |  |  |  |  |  |  |  |  |  |  |  |  |  |  |  |  |  |  |    |
|                        |         | Section 891 |       |       |       |        |       |       |       |       |       |       |     |       |     |     |     |    |        |     |    |    |      |     |    |    |    |     |     |    |      |     |     |     |     |     |     |     |     |     |     |     |      |    |    |       |     |    |    |   |   |   |   |   |   |   |   |  |  |  |  |  |  |  |  |  |  |  |  |  |  |  |  |  |  |  |  |  |  |  |  |  |  |  |  |  |  |  |  |  |  |  |  |  |  |  |  |  |  |  |  |  |  |  |  |  |  |  |  |  |  |  |  |  |  |  |  |  |  |  |  |  |  |  |  |  |  |  |  |  |  |  |  |  |  |  |  |  |  |  |  |  |  |  |  |  |  |  |  |  |  |  |  |  |  |  |  |  |  |  |  |  |  |  |  |  |  |  |  |  |  |  |  |  |  |  |  |  |  |  |  |  |  |  |  |  |  |  |  |  |  |  |  |  |  |  |  |  |  |  |  |  |  |  |  |  |  |  |  |  |  |  |  |  |  |  |  |  |  |  |  |  |  |  |  |  |  |  |  |  |  |  |  |  |  |  |  |  |  |  |  |  |  |  |  |  |  |  |  |  |  |  |  |  |  |  |  |  |  |  |  |  |  |  |  |  |  |  |  |  |  |  |  |  |  |  |  |  |  |  |  |  |  |  |  |  |  |  |  |  |  |  |  |  |  |  |  |  |  |  |  |  |  |  |  |  |  |  |  |  |  |  |  |  |  |  |  |  |  |  |  |  |  |  |  |  |  |  |  |  |  |  |  |  |  |  |  |  |  |  |  |  |  |  |  |  |  |  |  |  |  |  |  |  |  |  |  |  |  |  |  |  |  |  |  |  |  |  |  |  |  |  |  |  |  |  |  |  |  |  |  |  |  |  |  |  |  |  |  |  |  |  |  |  |  |  |  |  |  |  |  |  |  |  |  |  |  |  |  |  |  |  |  |  |  |  |  |  |  |  |  |  |  |  |  |  |  |  |  |  |  |  |  |  |  |  |  |  |  |  |  |  |  |  |  |  |  |  |  |  |  |  |  |  |  |  |  |  |  |  |  |  |  |  |  |  |  |  |  |  |  |  |  |  |  |  |  |  |  |  |  |  |  |  |  |  |  |  |  |  |  |  |  |  |  |  |  |  |  |  |  |  |  |  |  |  |  |  |  |  |  |  |  |  |  |  |  |  |  |  |  |  |  |  |  |  |  |  |  |  |  |  |  |  |  |  |  |  |  |  |  |  |  |  |  |  |  |  |  |  |  |  |  |  |  |  |  |  |  |  |  |  |  |  |  |  |  |  |  |  |  |  |  |  |  |  |  |  |  |  |  |  |  |  |  |  |  |  |  |  |  |  |  |  |  |  |  |  |  |  |  |  |  |  |  |  |  |  |  |  |  |  |  |  |  |  |  |  |  |  |  |  |  |  |  |  |  |  |  |  |  |  |  |  |  |  |  |  |  |  |  |  |  |  |  |  |  |  |  |  |  |  |  |  |  |  |  |  |  |  |  |  |  |  |  |  |  |  |  |  |  |  |  |  |  |  |  |  |  |  |  |  |  |  |  |  |  |  |  |  |  |  |  |  |  |  |  |  |  |  |  |  |  |  |  |  |  |  |  |  |  |  |  |  |  |  |  |  |  |  |  |  |  |  |  |  |  |  |  |  |  |  |  |  |  |  |  |  |  |  |  |  |  |  |  |  |  |  |  |  |  |  |  |  |  |  |  |  |  |  |  |  |  |  |  |  |  |  |  |  |  |  |  |  |  |  |  |  |  |  |  |  |  |  |  |  |  |  |  |  |  |  |  |  |  |  |  |  |  |  |  |  |  |  |  |  |  |  |  |  |  |  |  |  |  |  |  |  |  |  |  |  |  |  |  |  |  |  |  |  |  |  |  |  |  |  |  |  |  |  |  |  |  |  |  |  |  |  |  |  |  |  |  |  |  |  |  |  |  |  |  |  |  |  |  |  |  |  |  |  |  |  |  |  |  |  |  |  |  |  |  |  |  |  |  |  |  |  |  |  |  |  |  |  |  |  |  |  |  |  |  |  |  |  |  |  |  |  |  |  |  |  |  |  |  |  |  |  |  |  |  |  |  |  |  |  |  |  |  |  |  |  |  |  |  |  |  |  |  |  |  |  |  |  |  |  |  |  |  |  |  |  |  |  |  |  |  |  |  |  |  |  |  |  |  |  |  |  |  |  |  |  |  |  |  |  |  |  |  |  |  |  |  |  |  |  |  |  |  |  |  |  |  |  |  |  |  |  |  |  |  |  |  |  |  |  |  |  |  |  |  |  |  |  |  |  |  |  |  |  |  |  |  |  |  |    |
|                        |         | (85441)     | 85441 | 85448 | 85459 | 85470  | 85481 | 85492 | 85503 | 85514 | 85525 | 85536 |     |       |     |     |     |    |        |     |    |    |      |     |    |    |    |     |     |    |      |     |     |     |     |     |     |     |     |     |     |     |      |    |    |       |     |    |    |   |   |   |   |   |   |   |   |  |  |  |  |  |  |  |  |  |  |  |  |  |  |  |  |  |  |  |  |  |  |  |  |  |  |  |  |  |  |  |  |  |  |  |  |  |  |  |  |  |  |  |  |  |  |  |  |  |  |  |  |  |  |  |  |  |  |  |  |  |  |  |  |  |  |  |  |  |  |  |  |  |  |  |  |  |  |  |  |  |  |  |  |  |  |  |  |  |  |  |  |  |  |  |  |  |  |  |  |  |  |  |  |  |  |  |  |  |  |  |  |  |  |  |  |  |  |  |  |  |  |  |  |  |  |  |  |  |  |  |  |  |  |  |  |  |  |  |  |  |  |  |  |  |  |  |  |  |  |  |  |  |  |  |  |  |  |  |  |  |  |  |  |  |  |  |  |  |  |  |  |  |  |  |  |  |  |  |  |  |  |  |  |  |  |  |  |  |  |  |  |  |  |  |  |  |  |  |  |  |  |  |  |  |  |  |  |  |  |  |  |  |  |  |  |  |  |  |  |  |  |  |  |  |  |  |  |  |  |  |  |  |  |  |  |  |  |  |  |  |  |  |  |  |  |  |  |  |  |  |  |  |  |  |  |  |  |  |  |  |  |  |  |  |  |  |  |  |  |  |  |  |  |  |  |  |  |  |  |  |  |  |  |  |  |  |  |  |  |  |  |  |  |  |  |  |  |  |  |  |  |  |  |  |  |  |  |  |  |  |  |  |  |  |  |  |  |  |  |  |  |  |  |  |  |  |  |  |  |  |  |  |  |  |  |  |  |  |  |  |  |  |  |  |  |  |  |  |  |  |  |  |  |  |  |  |  |  |  |  |  |  |  |  |  |  |  |  |  |  |  |  |  |  |  |  |  |  |  |  |  |  |  |  |  |  |  |  |  |  |  |  |  |  |  |  |  |  |  |  |  |  |  |  |  |  |  |  |  |  |  |  |  |  |  |  |  |  |  |  |  |  |  |  |  |  |  |  |  |  |  |  |  |  |  |  |  |  |  |  |  |  |  |  |  |  |  |  |  |  |  |  |  |  |  |  |  |  |  |  |  |  |  |  |  |  |  |  |  |  |  |  |  |  |  |  |  |  |  |  |  |  |  |  |  |  |  |  |  |  |  |  |  |  |  |  |  |  |  |  |  |  |  |  |  |  |  |  |  |  |  |  |  |  |  |  |  |  |  |  |  |  |  |  |  |  |  |  |  |  |  |  |  |  |  |  |  |  |  |  |  |  |  |  |  |  |  |  |  |  |  |  |  |  |  |  |  |  |  |  |  |  |  |  |  |  |  |  |  |  |  |  |  |  |  |  |  |  |  |  |  |  |  |  |  |  |  |  |  |  |  |  |  |  |  |  |  |  |  |  |  |  |  |  |  |  |  |  |  |  |  |  |  |  |  |  |  |  |  |  |  |  |  |  |  |  |  |  |  |  |  |  |  |  |  |  |  |  |  |  |  |  |  |  |  |  |  |  |  |  |  |  |  |  |  |  |  |  |  |  |  |  |  |  |  |  |  |  |  |  |  |  |  |  |  |  |  |  |  |  |  |  |  |  |  |  |  |  |  |  |  |  |  |  |  |  |  |  |  |  |  |  |  |  |  |  |  |  |  |  |  |  |  |  |  |  |  |  |  |  |  |  |  |  |  |  |  |  |  |  |  |  |  |  |  |  |  |  |  |  |  |  |  |  |  |  |  |  |  |  |  |  |  |  |  |  |  |  |  |  |  |  |  |  |  |  |  |  |  |  |  |  |  |  |  |  |  |  |  |  |  |  |  |  |  |  |  |  |  |  |  |  |  |  |  |  |  |  |  |  |  |  |  |  |  |  |  |  |  |  |  |  |  |  |  |  |  |  |  |  |  |  |  |  |  |  |  |  |  |  |  |  |  |  |  |  |  |  |  |  |  |  |  |  |  |  |  |  |  |  |  |  |  |  |  |  |  |  |  |  |  |  |  |  |  |  |  |  |  |  |  |  |  |  |  |  |  |  |  |  |  |  |  |  |  |  |  |  |  |  |  |  |  |  |  |  |  |  |  |  |  |  |  |  |  |  |  |  |  |  |  |  |  |  |  |  |  |  |  |  |  |  |  |  |  |  |  |  |  |  |  |  |  |  |  |  |  |  |  |  |  |  |  |  |  |  |  |  |  |  |  |  |  |  |  |  |  |  |  |  |  |  |  |  |  |  |  |    |
| T4 NC_000866.4         | (85331) | A           | TT    | ---   | G     | AA     | AT    | TG    | AA    | T     | C     | TG    | GGG | C     | TGG | TAC | T   | G  | AAT    | AT  | G  | A  | T    | AA  | T  | CG | TT | CA  | AT  | CT | G    | AT  | T   | CT  | T   | G   | A   | CTG | A   | AG  | A   | AC  | G    | AT | TT | T     | A   | C  | G  |   |   |   |   |   |   |   |   |  |  |  |  |  |  |  |  |  |  |  |  |  |  |  |  |  |  |  |  |  |  |  |  |  |  |  |  |  |  |  |  |  |  |  |  |  |  |  |  |  |  |  |  |  |  |  |  |  |  |  |  |  |  |  |  |  |  |  |  |  |  |  |  |  |  |  |  |  |  |  |  |  |  |  |  |  |  |  |  |  |  |  |  |  |  |  |  |  |  |  |  |  |  |  |  |  |  |  |  |  |  |  |  |  |  |  |  |  |  |  |  |  |  |  |  |  |  |  |  |  |  |  |  |  |  |  |  |  |  |  |  |  |  |  |  |  |  |  |  |  |  |  |  |  |  |  |  |  |  |  |  |  |  |  |  |  |  |  |  |  |  |  |  |  |  |  |  |  |  |  |  |  |  |  |  |  |  |  |  |  |  |  |  |  |  |  |  |  |  |  |  |  |  |  |  |  |  |  |  |  |  |  |  |  |  |  |  |  |  |  |  |  |  |  |  |  |  |  |  |  |  |  |  |  |  |  |  |  |  |  |  |  |  |  |  |  |  |  |  |  |  |  |  |  |  |  |  |  |  |  |  |  |  |  |  |  |  |  |  |  |  |  |  |  |  |  |  |  |  |  |  |  |  |  |  |  |  |  |  |  |  |  |  |  |  |  |  |  |  |  |  |  |  |  |  |  |  |  |  |  |  |  |  |  |  |  |  |  |  |  |  |  |  |  |  |  |  |  |  |  |  |  |  |  |  |  |  |  |  |  |  |  |  |  |  |  |  |  |  |  |  |  |  |  |  |  |  |  |  |  |  |  |  |  |  |  |  |  |  |  |  |  |  |  |  |  |  |  |  |  |  |  |  |  |  |  |  |  |  |  |  |  |  |  |  |  |  |  |  |  |  |  |  |  |  |  |  |  |  |  |  |  |  |  |  |  |  |  |  |  |  |  |  |  |  |  |  |  |  |  |  |  |  |  |  |  |  |  |  |  |  |  |  |  |  |  |  |  |  |  |  |  |  |  |  |  |  |  |  |  |  |  |  |  |  |  |  |  |  |  |  |  |  |  |  |  |  |  |  |  |  |  |  |  |  |  |  |  |  |  |  |  |  |  |  |  |  |  |  |  |  |  |  |  |  |  |  |  |  |  |  |  |  |  |  |  |  |  |  |  |  |  |  |  |  |  |  |  |  |  |  |  |  |  |  |  |  |  |  |  |  |  |  |  |  |  |  |  |  |  |  |  |  |  |  |  |  |  |  |  |  |  |  |  |  |  |  |  |  |  |  |  |  |  |  |  |  |  |  |  |  |  |  |  |  |  |  |  |  |  |  |  |  |  |  |  |  |  |  |  |  |  |  |  |  |  |  |  |  |  |  |  |  |  |  |  |  |  |  |  |  |  |  |  |  |  |  |  |  |  |  |  |  |  |  |  |  |  |  |  |  |  |  |  |  |  |  |  |  |  |  |  |  |  |  |  |  |  |  |  |  |  |  |  |  |  |  |  |  |  |  |  |  |  |  |  |  |  |  |  |  |  |  |  |  |  |  |  |  |  |  |  |  |  |  |  |  |  |  |  |  |  |  |  |  |  |  |  |  |  |  |  |  |  |  |  |  |  |  |  |  |  |  |  |  |  |  |  |  |  |  |  |  |  |  |  |  |  |  |  |  |  |  |  |  |  |  |  |  |  |  |  |  |  |  |  |  |  |  |  |  |  |  |  |  |  |  |  |  |  |  |  |  |  |  |  |  |  |  |  |  |  |  |  |  |  |  |  |  |  |  |  |  |  |  |  |  |  |  |  |  |  |  |  |  |  |  |  |  |  |  |  |  |  |  |  |  |  |  |  |  |  |  |  |  |  |  |  |  |  |  |  |  |  |  |  |  |  |  |  |  |  |  |  |  |  |  |  |  |  |  |  |  |  |  |  |  |  |  |  |  |  |  |  |  |  |  |  |  |  |  |  |  |  |  |  |  |  |  |  |  |  |  |  |  |  |  |  |  |  |  |  |  |  |  |  |  |  |  |  |  |  |  |  |  |  |  |  |  |  |  |  |  |  |  |  |  |  |  |  |  |  |  |  |  |  |  |  |  |  |  |  |  |  |  |  |  |  |  |  |  |  |  |  |  |  |  |  |  |  |  |  |  |  |  |  |  |  |  |  |  |  |  |  |  |  |  |  |  |  |  |  |  |  |  |  |  |    |
| SARS-CoV-2 NC_045512.2 | (3653)  | C           | TT    | CT    | T     | A      | AG    | AG    | TG    | CT    | T     | A     | TG  | AAAA  | TTT | TA  | A   | T  | C      | A   | GC | AC | GA   | AG  | T  | T  | C  | T   | A   | CT | T    | G   | CA  | CC  | ATT | T   | A   | T   | CAG | CTG | G   | TAT | TTTT | TG | -- | GTG   | CTG | AC | CC | T | A | T | A | C | A | T | - |  |  |  |  |  |  |  |  |  |  |  |  |  |  |  |  |  |  |  |  |  |  |  |  |  |  |  |  |  |  |  |  |  |  |  |  |  |  |  |  |  |  |  |  |  |  |  |  |  |  |  |  |  |  |  |  |  |  |  |  |  |  |  |  |  |  |  |  |  |  |  |  |  |  |  |  |  |  |  |  |  |  |  |  |  |  |  |  |  |  |  |  |  |  |  |  |  |  |  |  |  |  |  |  |  |  |  |  |  |  |  |  |  |  |  |  |  |  |  |  |  |  |  |  |  |  |  |  |  |  |  |  |  |  |  |  |  |  |  |  |  |  |  |  |  |  |  |  |  |  |  |  |  |  |  |  |  |  |  |  |  |  |  |  |  |  |  |  |  |  |  |  |  |  |  |  |  |  |  |  |  |  |  |  |  |  |  |  |  |  |  |  |  |  |  |  |  |  |  |  |  |  |  |  |  |  |  |  |  |  |  |  |  |  |  |  |  |  |  |  |  |  |  |  |  |  |  |  |  |  |  |  |  |  |  |  |  |  |  |  |  |  |  |  |  |  |  |  |  |  |  |  |  |  |  |  |  |  |  |  |  |  |  |  |  |  |  |  |  |  |  |  |  |  |  |  |  |  |  |  |  |  |  |  |  |  |  |  |  |  |  |  |  |  |  |  |  |  |  |  |  |  |  |  |  |  |  |  |  |  |  |  |  |  |  |  |  |  |  |  |  |  |  |  |  |  |  |  |  |  |  |  |  |  |  |  |  |  |  |  |  |  |  |  |  |  |  |  |  |  |  |  |  |  |  |  |  |  |  |  |  |  |  |  |  |  |  |  |  |  |  |  |  |  |  |  |  |  |  |  |  |  |  |  |  |  |  |  |  |  |  |  |  |  |  |  |  |  |  |  |  |  |  |  |  |  |  |  |  |  |  |  |  |  |  |  |  |  |  |  |  |  |  |  |  |  |  |  |  |  |  |  |  |  |  |  |  |  |  |  |  |  |  |  |  |  |  |  |  |  |  |  |  |  |  |  |  |  |  |  |  |  |  |  |  |  |  |  |  |  |  |  |  |  |  |  |  |  |  |  |  |  |  |  |  |  |  |  |  |  |  |  |  |  |  |  |  |  |  |  |  |  |  |  |  |  |  |  |  |  |  |  |  |  |  |  |  |  |  |  |  |  |  |  |  |  |  |  |  |  |  |  |  |  |  |  |  |  |  |  |  |  |  |  |  |  |  |  |  |  |  |  |  |  |  |  |  |  |  |  |  |  |  |  |  |  |  |  |  |  |  |  |  |  |  |  |  |  |  |  |  |  |  |  |  |  |  |  |  |  |  |  |  |  |  |  |  |  |  |  |  |  |  |  |  |  |  |  |  |  |  |  |  |  |  |  |  |  |  |  |  |  |  |  |  |  |  |  |  |  |  |  |  |  |  |  |  |  |  |  |  |  |  |  |  |  |  |  |  |  |  |  |  |  |  |  |  |  |  |  |  |  |  |  |  |  |  |  |  |  |  |  |  |  |  |  |  |  |  |  |  |  |  |  |  |  |  |  |  |  |  |  |  |  |  |  |  |  |  |  |  |  |  |  |  |  |  |  |  |  |  |  |  |  |  |  |  |  |  |  |  |  |  |  |  |  |  |  |  |  |  |  |  |  |  |  |  |  |  |  |  |  |  |  |  |  |  |  |  |  |  |  |  |  |  |  |  |  |  |  |  |  |  |  |  |  |  |  |  |  |  |  |  |  |  |  |  |  |  |  |  |  |  |  |  |  |  |  |  |  |  |  |  |  |  |  |  |  |  |  |  |  |  |  |  |  |  |  |  |  |  |  |  |  |  |  |  |  |  |  |  |  |  |  |  |  |  |  |  |  |  |  |  |  |  |  |  |  |  |  |  |  |  |  |  |  |  |  |  |  |  |  |  |  |  |  |  |  |  |  |  |  |  |  |  |  |  |  |  |  |  |  |  |  |  |  |  |  |  |  |  |  |  |  |  |  |  |  |  |  |  |  |  |  |  |  |  |  |  |  |  |  |  |  |  |  |  |  |  |  |  |  |  |  |  |  |  |  |  |  |  |  |  |  |  |  |  |  |  |  |  |  |  |  |  |  |  |  |  |  |  |  |  |  |  |  |  |  |  |  |  |  |  |  |  |  |  |  |  |  |  |  |  |  |  |  |  |  |    |
|                        |         | Section 892 |       |       |       |        |       |       |       |       |       |       |     |       |     |     |     |    |        |     |    |    |      |     |    |    |    |     |     |    |      |     |     |     |     |     |     |     |     |     |     |     |      |    |    |       |     |    |    |   |   |   |   |   |   |   |   |  |  |  |  |  |  |  |  |  |  |  |  |  |  |  |  |  |  |  |  |  |  |  |  |  |  |  |  |  |  |  |  |  |  |  |  |  |  |  |  |  |  |  |  |  |  |  |  |  |  |  |  |  |  |  |  |  |  |  |  |  |  |  |  |  |  |  |  |  |  |  |  |  |  |  |  |  |  |  |  |  |  |  |  |  |  |  |  |  |  |  |  |  |  |  |  |  |  |  |  |  |  |  |  |  |  |  |  |  |  |  |  |  |  |  |  |  |  |  |  |  |  |  |  |  |  |  |  |  |  |  |  |  |  |  |  |  |  |  |  |  |  |  |  |  |  |  |  |  |  |  |  |  |  |  |  |  |  |  |  |  |  |  |  |  |  |  |  |  |  |  |  |  |  |  |  |  |  |  |  |  |  |  |  |  |  |  |  |  |  |  |  |  |  |  |  |  |  |  |  |  |  |  |  |  |  |  |  |  |  |  |  |  |  |  |  |  |  |  |  |  |  |  |  |  |  |  |  |  |  |  |  |  |  |  |  |  |  |  |  |  |  |  |  |  |  |  |  |  |  |  |  |  |  |  |  |  |  |  |  |  |  |  |  |  |  |  |  |  |  |  |  |  |  |  |  |  |  |  |  |  |  |  |  |  |  |  |  |  |  |  |  |  |  |  |  |  |  |  |  |  |  |  |  |  |  |  |  |  |  |  |  |  |  |  |  |  |  |  |  |  |  |  |  |  |  |  |  |  |  |  |  |  |  |  |  |  |  |  |  |  |  |  |  |  |  |  |  |  |  |  |  |  |  |  |  |  |  |  |  |  |  |  |  |  |  |  |  |  |  |  |  |  |  |  |  |  |  |  |  |  |  |  |  |  |  |  |  |  |  |  |  |  |  |  |  |  |  |  |  |  |  |  |  |  |  |  |  |  |  |  |  |  |  |  |  |  |  |  |  |  |  |  |  |  |  |  |  |  |  |  |  |  |  |  |  |  |  |  |  |  |  |  |  |  |  |  |  |  |  |  |  |  |  |  |  |  |  |  |  |  |  |  |  |  |  |  |  |  |  |  |  |  |  |  |  |  |  |  |  |  |  |  |  |  |  |  |  |  |  |  |  |  |  |  |  |  |  |  |  |  |  |  |  |  |  |  |  |  |  |  |  |  |  |  |  |  |  |  |  |  |  |  |  |  |  |  |  |  |  |  |  |  |  |  |  |  |  |  |  |  |  |  |  |  |  |  |  |  |  |  |  |  |  |  |  |  |  |  |  |  |  |  |  |  |  |  |  |  |  |  |  |  |  |  |  |  |  |  |  |  |  |  |  |  |  |  |  |  |  |  |  |  |  |  |  |  |  |  |  |  |  |  |  |  |  |  |  |  |  |  |  |  |  |  |  |  |  |  |  |  |  |  |  |  |  |  |  |  |  |  |  |  |  |  |  |  |  |  |  |  |  |  |  |  |  |  |  |  |  |  |  |  |  |  |  |  |  |  |  |  |  |  |  |  |  |  |  |  |  |  |  |  |  |  |  |  |  |  |  |  |  |  |  |  |  |  |  |  |  |  |  |  |  |  |  |  |  |  |  |  |  |  |  |  |  |  |  |  |  |  |  |  |  |  |  |  |  |  |  |  |  |  |  |  |  |  |  |  |  |  |  |  |  |  |  |  |  |  |  |  |  |  |  |  |  |  |  |  |  |  |  |  |  |  |  |  |  |  |  |  |  |  |  |  |  |  |  |  |  |  |  |  |  |  |  |  |  |  |  |  |  |  |  |  |  |  |  |  |  |  |  |  |  |  |  |  |  |  |  |  |  |  |  |  |  |  |  |  |  |  |  |  |  |  |  |  |  |  |  |  |  |  |  |  |  |  |  |  |  |  |  |  |  |  |  |  |  |  |  |  |  |  |  |  |  |  |  |  |  |  |  |  |  |  |  |  |  |  |  |  |  |  |  |  |  |  |  |  |  |  |  |  |  |  |  |  |  |  |  |  |  |  |  |  |  |  |  |  |  |  |  |  |  |  |  |  |  |  |  |  |  |  |  |  |  |  |  |  |  |  |  |  |  |  |  |  |  |  |  |  |  |  |  |  |  |  |  |  |  |  |  |  |  |  |  |  |  |  |  |  |  |  |  |  |  |  |  |  |  |  |  |  |  |  |  |  |  |  |  |  |  |  |  |  |  |  |  |    |
|                        |         | (85537)     | 85537 | 85547 | 85558 | 85569  | 85580 | 85591 | 85602 | 85613 | 85632 |       |     |       |     |     |     |    |        |     |    |    |      |     |    |    |    |     |     |    |      |     |     |     |     |     |     |     |     |     |     |     |      |    |    |       |     |    |    |   |   |   |   |   |   |   |   |  |  |  |  |  |  |  |  |  |  |  |  |  |  |  |  |  |  |  |  |  |  |  |  |  |  |  |  |  |  |  |  |  |  |  |  |  |  |  |  |  |  |  |  |  |  |  |  |  |  |  |  |  |  |  |  |  |  |  |  |  |  |  |  |  |  |  |  |  |  |  |  |  |  |  |  |  |  |  |  |  |  |  |  |  |  |  |  |  |  |  |  |  |  |  |  |  |  |  |  |  |  |  |  |  |  |  |  |  |  |  |  |  |  |  |  |  |  |  |  |  |  |  |  |  |  |  |  |  |  |  |  |  |  |  |  |  |  |  |  |  |  |  |  |  |  |  |  |  |  |  |  |  |  |  |  |  |  |  |  |  |  |  |  |  |  |  |  |  |  |  |  |  |  |  |  |  |  |  |  |  |  |  |  |  |  |  |  |  |  |  |  |  |  |  |  |  |  |  |  |  |  |  |  |  |  |  |  |  |  |  |  |  |  |  |  |  |  |  |  |  |  |  |  |  |  |  |  |  |  |  |  |  |  |  |  |  |  |  |  |  |  |  |  |  |  |  |  |  |  |  |  |  |  |  |  |  |  |  |  |  |  |  |  |  |  |  |  |  |  |  |  |  |  |  |  |  |  |  |  |  |  |  |  |  |  |  |  |  |  |  |  |  |  |  |  |  |  |  |  |  |  |  |  |  |  |  |  |  |  |  |  |  |  |  |  |  |  |  |  |  |  |  |  |  |  |  |  |  |  |  |  |  |  |  |  |  |  |  |  |  |  |  |  |  |  |  |  |  |  |  |  |  |  |  |  |  |  |  |  |  |  |  |  |  |  |  |  |  |  |  |  |  |  |  |  |  |  |  |  |  |  |  |  |  |  |  |  |  |  |  |  |  |  |  |  |  |  |  |  |  |  |  |  |  |  |  |  |  |  |  |  |  |  |  |  |  |  |  |  |  |  |  |  |  |  |  |  |  |  |  |  |  |  |  |  |  |  |  |  |  |  |  |  |  |  |  |  |  |  |  |  |  |  |  |  |  |  |  |  |  |  |  |  |  |  |  |  |  |  |  |  |  |  |  |  |  |  |  |  |  |  |  |  |  |  |  |  |  |  |  |  |  |  |  |  |  |  |  |  |  |  |  |  |  |  |  |  |  |  |  |  |  |  |  |  |  |  |  |  |  |  |  |  |  |  |  |  |  |  |  |  |  |  |  |  |  |  |  |  |  |  |  |  |  |  |  |  |  |  |  |  |  |  |  |  |  |  |  |  |  |  |  |  |  |  |  |  |  |  |  |  |  |  |  |  |  |  |  |  |  |  |  |  |  |  |  |  |  |  |  |  |  |  |  |  |  |  |  |  |  |  |  |  |  |  |  |  |  |  |  |  |  |  |  |  |  |  |  |  |  |  |  |  |  |  |  |  |  |  |  |  |  |  |  |  |  |  |  |  |  |  |  |  |  |  |  |  |  |  |  |  |  |  |  |  |  |  |  |  |  |  |  |  |  |  |  |  |  |  |  |  |  |  |  |  |  |  |  |  |  |  |  |  |  |  |  |  |  |  |  |  |  |  |  |  |  |  |  |  |  |  |  |  |  |  |  |  |  |  |  |  |  |  |  |  |  |  |  |  |  |  |  |  |  |  |  |  |  |  |  |  |  |  |  |  |  |  |  |  |  |  |  |  |  |  |  |  |  |  |  |  |  |  |  |  |  |  |  |  |  |  |  |  |  |  |  |  |  |  |  |  |  |  |  |  |  |  |  |  |  |  |  |  |  |  |  |  |  |  |  |  |  |  |  |  |  |  |  |  |  |  |  |  |  |  |  |  |  |  |  |  |  |  |  |  |  |  |  |  |  |  |  |  |  |  |  |  |  |  |  |  |  |  |  |  |  |  |  |  |  |  |  |  |  |  |  |  |  |  |  |  |  |  |  |  |  |  |  |  |  |  |  |  |  |  |  |  |  |  |  |  |  |  |  |  |  |  |  |  |  |  |  |  |  |  |  |  |  |  |  |  |  |  |  |  |  |  |  |  |  |  |  |  |  |  |  |  |  |  |  |  |  |  |  |  |  |  |  |  |  |  |  |  |  |  |  |  |  |  |  |  |  |  |  |  |  |  |  |  |  |  |  |  |  |  |  |  |  |  |  |  |  |  |  |  |  |  |  |  |  |  |  |  |  |  |  |  |    |
| T4 NC_000866.4         | (85424) | G           | CAAC  | AG    | GA    | AG     | A     | TGT   | TAAT  | GT    | TACT  | TA    | --  | TATAG | AA  | A   | G   | AA | G--    | C   | T  | A  | T    | T   | CT | AA | T  | GG  | T   | AA | ATTG | CA  | A   | TGG | A   | CCG | T   | AA  | -   | CT  | AT  | T   | CAT  | AA | T  | CTTTT | G   | GG | A  | C |   |   |   |   |   |   |   |  |  |  |  |  |  |  |  |  |  |  |  |  |  |  |  |  |  |  |  |  |  |  |  |  |  |  |  |  |  |  |  |  |  |  |  |  |  |  |  |  |  |  |  |  |  |  |  |  |  |  |  |  |  |  |  |  |  |  |  |  |  |  |  |  |  |  |  |  |  |  |  |  |  |  |  |  |  |  |  |  |  |  |  |  |  |  |  |  |  |  |  |  |  |  |  |  |  |  |  |  |  |  |  |  |  |  |  |  |  |  |  |  |  |  |  |  |  |  |  |  |  |  |  |  |  |  |  |  |  |  |  |  |  |  |  |  |  |  |  |  |  |  |  |  |  |  |  |  |  |  |  |  |  |  |  |  |  |  |  |  |  |  |  |  |  |  |  |  |  |  |  |  |  |  |  |  |  |  |  |  |  |  |  |  |  |  |  |  |  |  |  |  |  |  |  |  |  |  |  |  |  |  |  |  |  |  |  |  |  |  |  |  |  |  |  |  |  |  |  |  |  |  |  |  |  |  |  |  |  |  |  |  |  |  |  |  |  |  |  |  |  |  |  |  |  |  |  |  |  |  |  |  |  |  |  |  |  |  |  |  |  |  |  |  |  |  |  |  |  |  |  |  |  |  |  |  |  |  |  |  |  |  |  |  |  |  |  |  |  |  |  |  |  |  |  |  |  |  |  |  |  |  |  |  |  |  |  |  |  |  |  |  |  |  |  |  |  |  |  |  |  |  |  |  |  |  |  |  |  |  |  |  |  |  |  |  |  |  |  |  |  |  |  |  |  |  |  |  |  |  |  |  |  |  |  |  |  |  |  |  |  |  |  |  |  |  |  |  |  |  |  |  |  |  |  |  |  |  |  |  |  |  |  |  |  |  |  |  |  |  |  |  |  |  |  |  |  |  |  |  |  |  |  |  |  |  |  |  |  |  |  |  |  |  |  |  |  |  |  |  |  |  |  |  |  |  |  |  |  |  |  |  |  |  |  |  |  |  |  |  |  |  |  |  |  |  |  |  |  |  |  |  |  |  |  |  |  |  |  |  |  |  |  |  |  |  |  |  |  |  |  |  |  |  |  |  |  |  |  |  |  |  |  |  |  |  |  |  |  |  |  |  |  |  |  |  |  |  |  |  |  |  |  |  |  |  |  |  |  |  |  |  |  |  |  |  |  |  |  |  |  |  |  |  |  |  |  |  |  |  |  |  |  |  |  |  |  |  |  |  |  |  |  |  |  |  |  |  |  |  |  |  |  |  |  |  |  |  |  |  |  |  |  |  |  |  |  |  |  |  |  |  |  |  |  |  |  |  |  |  |  |  |  |  |  |  |  |  |  |  |  |  |  |  |  |  |  |  |  |  |  |  |  |  |  |  |  |  |  |  |  |  |  |  |  |  |  |  |  |  |  |  |  |  |  |  |  |  |  |  |  |  |  |  |  |  |  |  |  |  |  |  |  |  |  |  |  |  |  |  |  |  |  |  |  |  |  |  |  |  |  |  |  |  |  |  |  |  |  |  |  |  |  |  |  |  |  |  |  |  |  |  |  |  |  |  |  |  |  |  |  |  |  |  |  |  |  |  |  |  |  |  |  |  |  |  |  |  |  |  |  |  |  |  |  |  |  |  |  |  |  |  |  |  |  |  |  |  |  |  |  |  |  |  |  |  |  |  |  |  |  |  |  |  |  |  |  |  |  |  |  |  |  |  |  |  |  |  |  |  |  |  |  |  |  |  |  |  |  |  |  |  |  |  |  |  |  |  |  |  |  |  |  |  |  |  |  |  |  |  |  |  |  |  |  |  |  |  |  |  |  |  |  |  |  |  |  |  |  |  |  |  |  |  |  |  |  |  |  |  |  |  |  |  |  |  |  |  |  |  |  |  |  |  |  |  |  |  |  |  |  |  |  |  |  |  |  |  |  |  |  |  |  |  |  |  |  |  |  |  |  |  |  |  |  |  |  |  |  |  |  |  |  |  |  |  |  |  |  |  |  |  |  |  |  |  |  |  |  |  |  |  |  |  |  |  |  |  |  |  |  |  |  |  |  |  |  |  |  |  |  |  |  |  |  |  |  |  |  |  |  |  |  |  |  |  |  |  |  |  |  |  |  |  |  |  |  |  |  |  |  |  |  |  |  |  |  |  |  |  |  |  |  |  |  |  |  |  |  |  |  |  |  |  |  |  |  |    |
| SARS-CoV-2 NC_045512.2 | (3746)  | T           | CTTT  | AA    | GA    | G      | TTT   | TGT   | GTA   | G     | A     | TACT  | G   | T     | T   | C   | G   | C  | A      | C   | A  |    |      |     |    |    |    |     |     |    |      |     |     |     |     |     |     |     |     |     |     |     |      |    |    |       |     |    |    |   |   |   |   |   |   |   |   |  |  |  |  |  |  |  |  |  |  |  |  |  |  |  |  |  |  |  |  |  |  |  |  |  |  |  |  |  |  |  |  |  |  |  |  |  |  |  |  |  |  |  |  |  |  |  |  |  |  |  |  |  |  |  |  |  |  |  |  |  |  |  |  |  |  |  |  |  |  |  |  |  |  |  |  |  |  |  |  |  |  |  |  |  |  |  |  |  |  |  |  |  |  |  |  |  |  |  |  |  |  |  |  |  |  |  |  |  |  |  |  |  |  |  |  |  |  |  |  |  |  |  |  |  |  |  |  |  |  |  |  |  |  |  |  |  |  |  |  |  |  |  |  |  |  |  |  |  |  |  |  |  |  |  |  |  |  |  |  |  |  |  |  |  |  |  |  |  |  |  |  |  |  |  |  |  |  |  |  |  |  |  |  |  |  |  |  |  |  |  |  |  |  |  |  |  |  |  |  |  |  |  |  |  |  |  |  |  |  |  |  |  |  |  |  |  |  |  |  |  |  |  |  |  |  |  |  |  |  |  |  |  |  |  |  |  |  |  |  |  |  |  |  |  |  |  |  |  |  |  |  |  |  |  |  |  |  |  |  |  |  |  |  |  |  |  |  |  |  |  |  |  |  |  |  |  |  |  |  |  |  |  |  |  |  |  |  |  |  |  |  |  |  |  |  |  |  |  |  |  |  |  |  |  |  |  |  |  |  |  |  |  |  |  |  |  |  |  |  |  |  |  |  |  |  |  |  |  |  |  |  |  |  |  |  |  |  |  |  |  |  |  |  |  |  |  |  |  |  |  |  |  |  |  |  |  |  |  |  |  |  |  |  |  |  |  |  |  |  |  |  |  |  |  |  |  |  |  |  |  |  |  |  |  |  |  |  |  |  |  |  |  |  |  |  |  |  |  |  |  |  |  |  |  |  |  |  |  |  |  |  |  |  |  |  |  |  |  |  |  |  |  |  |  |  |  |  |  |  |  |  |  |  |  |  |  |  |  |  |  |  |  |  |  |  |  |  |  |  |  |  |  |  |  |  |  |  |  |  |  |  |  |  |  |  |  |  |  |  |  |  |  |  |  |  |  |  |  |  |  |  |  |  |  |  |  |  |  |  |  |  |  |  |  |  |  |  |  |  |  |  |  |  |  |  |  |  |  |  |  |  |  |  |  |  |  |  |  |  |  |  |  |  |  |  |  |  |  |  |  |  |  |  |  |  |  |  |  |  |  |  |  |  |  |  |  |  |  |  |  |  |  |  |  |  |  |  |  |  |  |  |  |  |  |  |  |  |  |  |  |  |  |  |  |  |  |  |  |  |  |  |  |  |  |  |  |  |  |  |  |  |  |  |  |  |  |  |  |  |  |  |  |  |  |  |  |  |  |  |  |  |  |  |  |  |  |  |  |  |  |  |  |  |  |  |  |  |  |  |  |  |  |  |  |  |  |  |  |  |  |  |  |  |  |  |  |  |  |  |  |  |  |  |  |  |  |  |  |  |  |  |  |  |  |  |  |  |  |  |  |  |  |  |  |  |  |  |  |  |  |  |  |  |  |  |  |  |  |  |  |  |  |  |  |  |  |  |  |  |  |  |  |  |  |  |  |  |  |  |  |  |  |  |  |  |  |  |  |  |  |  |  |  |  |  |  |  |  |  |  |  |  |  |  |  |  |  |  |  |  |  |  |  |  |  |  |  |  |  |  |  |  |  |  |  |  |  |  |  |  |  |  |  |  |  |  |  |  |  |  |  |  |  |  |  |  |  |  |  |  |  |  |  |  |  |  |  |  |  |  |  |  |  |  |  |  |  |  |  |  |  |  |  |  |  |  |  |  |  |  |  |  |  |  |  |  |  |  |  |  |  |  |  |  |  |  |  |  |  |  |  |  |  |  |  |  |  |  |  |  |  |  |  |  |  |  |  |  |  |  |  |  |  |  |  |  |  |  |  |  |  |  |  |  |  |  |  |  |  |  |  |  |  |  |  |  |  |  |  |  |  |  |  |  |  |  |  |  |  |  |  |  |  |  |  |  |  |  |  |  |  |  |  |  |  |  |  |  |  |  |  |  |  |  |  |  |  |  |  |  |  |  |  |  |  |  |  |  |  |  |  |  |  |  |  |  |  |  |  |  |  |  |  |  |  |  |  |  |  |  |  |  |  |  |  |  |  |  |  |  |  |  |  |  |  |  |  | </ |



## SARS-CoV-2 & T4.apr

[illegible]

## SARS-CoV-2 &amp; T4.apr

|                        |         |           |              |             |            |            |            |             |            |           |              |                      |                          |
|------------------------|---------|-----------|--------------|-------------|------------|------------|------------|-------------|------------|-----------|--------------|----------------------|--------------------------|
|                        |         |           |              |             |            |            |            |             |            |           | Section 904  |                      |                          |
|                        | (86689) | 86689     | 86702        | 86713       | 86724      | 86735      | 86746      | 86757       | 86768      | 86784     |              |                      |                          |
| T4 NC_000866.4         | (86543) | TCGTTGTTT | TAGATGTTTCCT | GATACCGGA   | ATGTGTTCA  | ATAGCATCTT | TAACTGATAA | AGATGAA     | TGCCTTAAG  | TTAGGTGGA | AAATGGACTCC  | TTCT                 |                          |
| SARS-CoV-2 NC_045512.2 | (4793)  | TCCTATAAA | GATFGGTCCT   | ATCTCGGACAA | TCTACA     | ----       | CAACTA     | ----        | GGTATAGA   | ----      | ATTTCTTAAGAG | AGGTGATAAAAGTGTATATT |                          |
|                        |         |           |              |             |            |            |            |             |            |           | Section 905  |                      |                          |
|                        | (86785) | 86785     | 86790        | 86801       | 86812      | 86823      | 86834      | 86845       | 86856      | 86867     | 86880        |                      |                          |
| T4 NC_000866.4         | (86639) | TGCTAG    | GTCAATGA     | CTCGCGCTGA  | AGGTGAGGAG | ATGTCTGA   | AGGAACAA   | TTGA-ACC    | CG---GAGAC | GGGTATGT  | TGTGGGA      | AT-----TCTAT         |                          |
| SARS-CoV-2 NC_045512.2 | (4876)  | CACTAG    | ---TAATC     | CTACCA      | CATTCCAC   | CTAGATGG   | TGAAGTTATC | ACCTTTGA    | CAATCTTAA  | GACACTTC  | TTTCTTTGAGAG | AGTGAGGACTAT         |                          |
|                        |         |           |              |             |            |            |            |             |            |           | Section 906  |                      |                          |
|                        | (86881) | 86881     | 86889        | 86900       | 86911      | 86922      | 86933      | 86944       | 86955      | 86976     |              |                      |                          |
| T4 NC_000866.4         | (86725) | TTGAGAT   | TCCG-CCTG    | ATGTATCT    | TATAAAT    | AGATGCAC   | GAATGA     | AATATAT     | CTGTGGT    | TTCCTTGC  | CTGAGGA      | ATTAAAAGAA           | GACCCGACTAGATGG          |
| SARS-CoV-2 NC_045512.2 | (4969)  | TA-AGG    | TGTTTAA      | CAACAGTAGA  | CAACATTA   | ACCCTCAC   | -ACGC      | AAAGTTGT    | TGTGACAT   | TGTCAAT   | GACATATGG    | ACACAGTTT            | GGTCCAACTTATTTG          |
|                        |         |           |              |             |            |            |            |             |            |           | Section 907  |                      |                          |
|                        | (86977) | 86977     | 86988        | 86999       | 87010      | 87021      | 87032      | 87043       | 87054      | 87072     |              |                      |                          |
| T4 NC_000866.4         | (86820) | GGATA     | TGAAGAT      | TAATCT      | CACTTGGCA  | ACAA       | GATGATTTT  | TGGATTAATTT | TACCGTGT   | TAAAGGC   | AAATACTAT    | CCGTTTTA             | AAGCATATTTAGATTC         |
| SARS-CoV-2 NC_045512.2 | (5063)  | GA---     | TGGAGCT      | TGATGT      | ACTAAAAT   | AAAA       | CCTC       | -----       | TAATTTAC   | A-TGAAG   | -GTAAAA      | ATTTTAT              | GTTTTACCTAATGATGACACTCT  |
|                        |         |           |              |             |            |            |            |             |            |           | Section 908  |                      |                          |
|                        | (87073) | 87073     | 87087        | 87098       | 87109      | 87120      | 87131      | 87142       | 87153      | 87168     |              |                      |                          |
| T4 NC_000866.4         | (86916) | GTTTATT   | TTCTG        | AAGCTGC     | ATFAC      | CAGGA      | AAATAA     | AGGATT-TAG  | ACAAATAT   | TCAATA    | ATCACGA      | ATCT-TTGAAG          | -CTAAAGCTCATCCAAAT       |
| SARS-CoV-2 NC_045512.2 | (5146)  | ACGT--G   | TTGAG        | GCTTTT      | T-GAGTAC   | TACCA      | CACAACT    | GATCC       | TAGTTTT    | TC--TGGG  | TAGGTAC      | ATGTCAGCA            | TTAAATCACACTAAAAAGTGGAAA |
|                        |         |           |              |             |            |            |            |             |            |           | Section 909  |                      |                          |
|                        | (87169) | 87169     | 87175        | 87186       | 87197      | 87208      | 87219      | 87230       | 87241      | 87252     | 87264        |                      |                          |
| T4 NC_000866.4         | (87009) | GACCCA    | AAACGTTAA    | AGCTG       | AAAAGGAT   | TATTA      | TGACC-CAGA | AGATTTA     | ATGAGGCAT  | TCGGGTG   | AAATGATT     | TATGGAA              | AAATAGGCCACCTAT          |
| SARS-CoV-2 NC_045512.2 | (5237)  | TACCCA    | CAGGTTAA     | TGGTTT      | AACTT-C    | TATTA      | AATGGG     | CAGA----    | TAACAACT   | GTTATCT   | TTGCC        | ACTGCA               | TTGT-----AACTCCACAAA     |
|                        |         |           |              |             |            |            |            |             |            |           | Section 910  |                      |                          |
|                        | (87265) | 87265     | 87274        | 87285       | 87296      | 87307      | 87318      | 87329       | 87340      | 87360     |              |                      |                          |
| T4 NC_000866.4         | (87104) | TATTAT    | TGCAAT       | GGATCAAA    | CAGAAGA    | AATCA      | AATATCT    | GTGTTTACA   | TTTAAAA    | TTAAGGG   | AGCCCAT      | GGGCTCC              | CTTTTTCTTTATAAATACTATTA  |
| SARS-CoV-2 NC_045512.2 | (5322)  | TAGAG     | TTGAAGT      | -----       | TTAATC     | CACCTGC    | --TCTACA   | AGATG-C     | TTATTAC    | AGAGCA    | AGGGCT       | GGTGAAGCTGC          | --TAACTTTTGTG            |

## SARS-CoV-2 &amp; T4.apr

|                        |         |                                                                                                       |       |       |       |       |       |       |       |       |       |
|------------------------|---------|-------------------------------------------------------------------------------------------------------|-------|-------|-------|-------|-------|-------|-------|-------|-------|
| Section 911            |         |                                                                                                       |       |       |       |       |       |       |       |       |       |
|                        | (87361) | 87361                                                                                                 | 87373 | 87384 | 87395 | 87406 | 87417 | 87428 | 87439 | 87456 |       |
| T4 NC_000866.4         | (87200) | AACTCAT AAGGAAA CCGCTATGTTCATTCAAGAACCAAGAGAAATTGATTGATACCGCGGAATTGTTAACGCTTCTACTGGTGATATCTTATTCTGA   |       |       |       |       |       |       |       |       |       |
| SARS-CoV-2 NC_045512.2 | (5400)  | CACTTAT-CTTAGCCTACTGTAAAGACAGTAGGTGAGTTAGGTGAT-GTTAGAGAAACAAATGAGTACTTGT---TCAACATGC CAATTTAGA        |       |       |       |       |       |       |       |       |       |
| Section 912            |         |                                                                                                       |       |       |       |       |       |       |       |       |       |
|                        | (87457) | 87457                                                                                                 | 87472 | 87483 | 87494 | 87505 | 87516 | 87527 | 87538 | 87552 |       |
| T4 NC_000866.4         | (87296) | CGGTGGTAA TAAAATTAA TAGTGATTTTAAACGCAATTATAAATGCGTTTGGCGATCAGCGTAAAATGGCAGTAGCAAAATGGCACTGGAGCAGATGG  |       |       |       |       |       |       |       |       |       |
| SARS-CoV-2 NC_045512.2 | (5491)  | TTC TTGCAA-----AAGAGTC--TTGAACGTGGTGTGTAAACCTTGTGGACAA CAGCAGAA-----CAACCCTTAAGGGTGTA GAAGCTGTT--     |       |       |       |       |       |       |       |       |       |
| Section 913            |         |                                                                                                       |       |       |       |       |       |       |       |       |       |
|                        | (87553) | 87553                                                                                                 | 87560 | 87571 | 87582 | 87593 | 87604 | 87615 | 87626 | 87637 | 87648 |
| T4 NC_000866.4         | (87392) | TCAAATATTCATGCT- TACTGGATATTTATCAAAAAACACTCTATTACAGAGTACGCAACTCCAGTGAAAGTTGGCAC TAGACATGATATTGA-TACC  |       |       |       |       |       |       |       |       |       |
| SARS-CoV-2 NC_045512.2 | (5570)  | ----A-TGTA CATGGGCACTTCTTATGAACAA---TTTAAGAAA-GGTGTT CAGATACCTTGTAAGTG--TGGTAAACAAGCTACAAATATC        |       |       |       |       |       |       |       |       |       |
| Section 914            |         |                                                                                                       |       |       |       |       |       |       |       |       |       |
|                        | (87649) | 87649                                                                                                 | 87659 | 87670 | 87681 | 87692 | 87703 | 87714 | 87725 | 87744 |       |
| T4 NC_000866.4         | (87486) | TC-TACTGTAGGTGTAAAGTTATCAT TGA AAGAGCGGAACTCGGCGAT TGTGT-TGAATTCATTAAC TCTAATGGATCAATATCAGTTACTAATC   |       |       |       |       |       |       |       |       |       |
| SARS-CoV-2 NC_045512.2 | (5655)  | TAGTACAACAGGAGTCACTTTTGTTATGATGTCAAGCACCACCTGC---TCAGTATGAACTTAAG-----CATGGTACATTTAC-----             |       |       |       |       |       |       |       |       |       |
| Section 915            |         |                                                                                                       |       |       |       |       |       |       |       |       |       |
|                        | (87745) | 87745                                                                                                 | 87758 | 87769 | 87780 | 87791 | 87802 | 87813 | 87824 | 87840 |       |
| T4 NC_000866.4         | (87580) | CTTTGACAAATTCAGCTATFGATTC AATTA AAGGTGTTTCAGGTAA TTAGTAGTAAC TAGCCCATATAGTAAAGTTACTTTACGCTGTATTTTCAT  |       |       |       |       |       |       |       |       |       |
| SARS-CoV-2 NC_045512.2 | (5731)  | TTGTGCTAG-TGAGTACACTGGT-- AATTA CCAG----TGTGGTCACT-ATAAACATATACTTC TAAAGAACTTTGTATTGCATAGACGGTGCCT    |       |       |       |       |       |       |       |       |       |
| Section 916            |         |                                                                                                       |       |       |       |       |       |       |       |       |       |
|                        | (87841) | 87841                                                                                                 | 87846 | 87857 | 87868 | 87879 | 87890 | 87901 | 87912 | 87923 | 87936 |
| T4 NC_000866.4         | (87676) | CTGAT-AATTCTACGTCGGTTTGGAA TTA TCTATTGAAGTATGTTTGGACA AAAGGAATCAACCAGCTGAAGGTA CATGGAA TATTCTTACATCT  |       |       |       |       |       |       |       |       |       |
| SARS-CoV-2 NC_045512.2 | (5819)  | TTACTTTACAAAGTCTCAGAA TACAAAGGTCCTATT--ACGGATGTTTCTTAC AAAGAAAACAGTTACACAA CAACCATAA AACCAAGT-TACTTAT |       |       |       |       |       |       |       |       |       |
| Section 917            |         |                                                                                                       |       |       |       |       |       |       |       |       |       |
|                        | (87937) | 87937                                                                                                 | 87945 | 87956 | 87967 | 87978 | 87989 | 88000 | 88011 | 88032 |       |
| T4 NC_000866.4         | (87771) | GGATCAGTTGACATTCCATTATTTTCATCGTAC TGAATACAA TATGGCTAAATTGCTAGTTACGTGCCAATCGGTAGATGGAAGAAA AATTAAACA   |       |       |       |       |       |       |       |       |       |
| SARS-CoV-2 NC_045512.2 | (5912)  | AAATTGG-----ATGGTGTG-----TTTGT---A-----CAGAAATTGACCCTA---AGTTGGA---C-AATTATTATA                       |       |       |       |       |       |       |       |       |       |

## SARS-CoV-2 & T4.apr

[illegible]

## SARS-CoV-2 &amp; T4.apr

|                        |         |             |        |       |       |         |       |       |          |       |                   |             |                       |       |       |       |                |      |           |      |          |      |      |       |      |     |        |        |       |     |      |     |     |     |      |       |     |     |     |      |     |    |     |      |     |     |     |   |     |
|------------------------|---------|-------------|--------|-------|-------|---------|-------|-------|----------|-------|-------------------|-------------|-----------------------|-------|-------|-------|----------------|------|-----------|------|----------|------|------|-------|------|-----|--------|--------|-------|-----|------|-----|-----|-----|------|-------|-----|-----|-----|------|-----|----|-----|------|-----|-----|-----|---|-----|
|                        |         | Section 925 |        |       |       |         |       |       |          |       |                   |             |                       |       |       |       |                |      |           |      |          |      |      |       |      |     |        |        |       |     |      |     |     |     |      |       |     |     |     |      |     |    |     |      |     |     |     |   |     |
|                        |         | (88705)     | 88705  | 88715 | 88726 | 88737   | 88748 | 88759 | 88770    | 88781 | 88800             |             |                       |       |       |       |                |      |           |      |          |      |      |       |      |     |        |        |       |     |      |     |     |     |      |       |     |     |     |      |     |    |     |      |     |     |     |   |     |
| T4 NC_000866.4         | (88532) | CAAAT       | TGACA  | AAAT  | TAC   | CAG     | TTC   | AGACA | TTAG     | TA    | ATGTAGCTCGCAAAGAA | TT          | TTTAGTTGAAGTTCAAGGACA | AA    | CAG   | ACT   | TTT            | T    | AGATGTTTT | C    |          |      |      |       |      |     |        |        |       |     |      |     |     |     |      |       |     |     |     |      |     |    |     |      |     |     |     |   |     |
| SARS-CoV-2 NC_045512.2 | (6551)  | ATGGC       | TGCTT  | ATG   | TAGA  | CA      | TTC   | TAGTC | TTA      | CTA   | -----             | TT          | -----                 | AA    | GAA   | AC    | TAA            | T    | -----     | T    |          |      |      |       |      |     |        |        |       |     |      |     |     |     |      |       |     |     |     |      |     |    |     |      |     |     |     |   |     |
|                        |         | Section 926 |        |       |       |         |       |       |          |       |                   |             |                       |       |       |       |                |      |           |      |          |      |      |       |      |     |        |        |       |     |      |     |     |     |      |       |     |     |     |      |     |    |     |      |     |     |     |   |     |
|                        |         | (88801)     | 88801  | 88814 | 88825 | 88836   | 88847 | 88858 | 88869    | 88880 | 88896             |             |                       |       |       |       |                |      |           |      |          |      |      |       |      |     |        |        |       |     |      |     |     |     |      |       |     |     |     |      |     |    |     |      |     |     |     |   |     |
| T4 NC_000866.4         | (88678) | CGTG        | GAA    | C     | TAGT  | TA      | TAA   | TGTA  | AATACATC | A     | GAGTAA            | AACATCGTGGT | AACGAATT              | GT    | ATTAC | G     | GCGATGTGTTTAGC | G    | AAAA      | C    | AGCGATTT | T    | GGC  |       |      |     |        |        |       |     |      |     |     |     |      |       |     |     |     |      |     |    |     |      |     |     |     |   |     |
| SARS-CoV-2 NC_045512.2 | (6599)  | ----        | GAA    | T     | ATC   | TAG     | ----- | A     | -----    | GT    | ATTAG             | G           | TT                    | ----- | T     | G     | AAAA           | C    | -----     | CC   | T        | GGC  |      |       |      |     |        |        |       |     |      |     |     |     |      |       |     |     |     |      |     |    |     |      |     |     |     |   |     |
|                        |         | Section 927 |        |       |       |         |       |       |          |       |                   |             |                       |       |       |       |                |      |           |      |          |      |      |       |      |     |        |        |       |     |      |     |     |     |      |       |     |     |     |      |     |    |     |      |     |     |     |   |     |
|                        |         | (88897)     | 88897  | 88902 | 88913 | 88924   | 88935 | 88946 | 88957    | 88968 | 88979             | 88992       |                       |       |       |       |                |      |           |      |          |      |      |       |      |     |        |        |       |     |      |     |     |     |      |       |     |     |     |      |     |    |     |      |     |     |     |   |     |
| T4 NC_000866.4         | (88724) | TCTC        | CAG    | G     | CGAA  | AATGAAG | GAG   | AACT  | GGT      | TCC   | T                 | CTTG        | AT                    | GGAT  | TTA   | ACATT | CGATTAAG       | AC   | AGC       | CTTG | TAAT     | AT   | TGG  | T     | ACA  | CT  | GTTCAA | ATTGAA |       |     |      |     |     |     |      |       |     |     |     |      |     |    |     |      |     |     |     |   |     |
| SARS-CoV-2 NC_045512.2 | (6634)  | TACT        | CAT    | G     | GTTT  | AGCTGCT | GTT   | AA    | TAG      | TG    | TCC               | -           | CTTG                  | --    | GGAT  | TAC   | -----          | T    | AT        | AGC  | ----     | TAAT | TA   | TG    | C    | TA  | AGC    | CT     | ----- | T   |      |     |     |     |      |       |     |     |     |      |     |    |     |      |     |     |     |   |     |
|                        |         | Section 928 |        |       |       |         |       |       |          |       |                   |             |                       |       |       |       |                |      |           |      |          |      |      |       |      |     |        |        |       |     |      |     |     |     |      |       |     |     |     |      |     |    |     |      |     |     |     |   |     |
|                        |         | (88993)     | 88993  | 89001 | 89012 | 89023   | 89034 | 89045 | 89056    | 89067 | 89088             |             |                       |       |       |       |                |      |           |      |          |      |      |       |      |     |        |        |       |     |      |     |     |     |      |       |     |     |     |      |     |    |     |      |     |     |     |   |     |
| T4 NC_000866.4         | (88820) | ACATTT      | TATGGA | T     | GGTG  | TAT     | CAC   | AGT   | G        | GAG   | A                 | AGTTC       | CATA                  | TACAA | G     | A     | CGT            | C    | AAA       | TTAG | AT       | T    | GTTA | GA    | ATTC | -   | AAA    | TTAAC  | GT    | CA  | AAA  | A   | CT  | T   | CTTT | TA    | GA  |     |     |      |     |    |     |      |     |     |     |   |     |
| SARS-CoV-2 NC_045512.2 | (6698)  | -----       | TTTCT  | TA    | ACA   | A       | AGT   | T     | GTTA     | ----- | G                 | TACAA       | --                    | CT    | ACT   | AA    | ----           | C    | ATA       | GTTA | C        | AC   | GGT  | ----- | GT   | TT  | AAA    | C      | G     | T   | GTTT | -   | G   | T   |      |       |     |     |     |      |     |    |     |      |     |     |     |   |     |
|                        |         | Section 929 |        |       |       |         |       |       |          |       |                   |             |                       |       |       |       |                |      |           |      |          |      |      |       |      |     |        |        |       |     |      |     |     |     |      |       |     |     |     |      |     |    |     |      |     |     |     |   |     |
|                        |         | (89089)     | 89089  | 89100 | 89111 | 89122   | 89133 | 89144 | 89155    | 89166 | 89184             |             |                       |       |       |       |                |      |           |      |          |      |      |       |      |     |        |        |       |     |      |     |     |     |      |       |     |     |     |      |     |    |     |      |     |     |     |   |     |
| T4 NC_000866.4         | (88915) | AGGAA       | G      | CAT   | T     | TAC     | GTTA  | CT    | G        | ATTT  | AT                | CA          | AC                    | AA    | T     | GAAA  | T              | CAAT | T         | C    | ATT      | T    | T    | C     | T    | G   | CTTT   | T      | G     | GAT | TAAT | T   | CC  | AG  | G    | AG    | A   | AC  | CT  | ATT  | AAT | C  | CTA | ACT  | C   | T   | C   | T |     |
| SARS-CoV-2 NC_045512.2 | (6761)  | ACT         | AA     | TT    | AT    | A       | TGC   | ----  | CT       | T     | ATTT              | C           | TTT                   | AC    | TTT   | A     | ---            | T    | TGC       | T    | ACA      | ATT  | G    | T     | G    | T   | ACTTT  | ----   | TA    | C   | T    | AGA | AG  | T   | ACA  | ----- | AAT | T   | CTA | GAAT | T   | AA |     |      |     |     |     |   |     |
|                        |         | Section 930 |        |       |       |         |       |       |          |       |                   |             |                       |       |       |       |                |      |           |      |          |      |      |       |      |     |        |        |       |     |      |     |     |     |      |       |     |     |     |      |     |    |     |      |     |     |     |   |     |
|                        |         | (89185)     | 89185  | 89199 | 89210 | 89221   | 89232 | 89243 | 89254    | 89265 | 89280             |             |                       |       |       |       |                |      |           |      |          |      |      |       |      |     |        |        |       |     |      |     |     |     |      |       |     |     |     |      |     |    |     |      |     |     |     |   |     |
| T4 NC_000866.4         | (89011) | T           | G      | AGGT  | T     | CGTTTT  | A     | ACGGG | AT       | TTT   | A                 | C           | AG                    | A     | ATTG  | G     | CT             | GGC  | A         | C    | GT       | GG   | A    | T     | GCC  | ATT | AT     | TT     | TC    | ATT | G    | T   | GTT | GG  | TGC  | C     | GA  | TT  | C   | A    | G   | AC | GA  | TGA  | AGT | AGA |     |   |     |
| SARS-CoV-2 NC_045512.2 | (6838)  | A           | G      | CATC  | T     | AT      | GCCG  | A     | CTACT    | AT    | AGC               | AA          | AG                    | AA    | TACT  | G     | T              | T    | AAG       | AG   | T        | G    | T    | C     | GG   | TA  | ---    | A      | ATT   | T   | T    | G   | TC  | TAG | ---  | A     | GG  | CTT | C   | AT   | TT  | A  | ATT | TATT | TGA | AGT | CAC |   |     |
|                        |         | Section 931 |        |       |       |         |       |       |          |       |                   |             |                       |       |       |       |                |      |           |      |          |      |      |       |      |     |        |        |       |     |      |     |     |     |      |       |     |     |     |      |     |    |     |      |     |     |     |   |     |
|                        |         | (89281)     | 89281  | 89287 | 89298 | 89309   | 89320 | 89331 | 89342    | 89353 | 89364             | 89376       |                       |       |       |       |                |      |           |      |          |      |      |       |      |     |        |        |       |     |      |     |     |     |      |       |     |     |     |      |     |    |     |      |     |     |     |   |     |
| T4 NC_000866.4         | (89107) | A           | T      | G     | C     | T       | C     | T     | G        | T     | T                 | T           | A                     | G     | G     | T     | G              | G    | G         | A    | C        | A    | A    | -     | T    | C   | -      | T      | C     | A   | T    | C   | G   | A   | T    | T     | A   | C   | G   | A    | A   | T  | TTT | A    | C   | -   | -   | A | TTT |
| SARS-CoV-2 NC_045512.2 | (6927)  | C           | T      | AA    | T     | T       | T     | T     | C        | T     | AA                | AC          | T                     | G     | A     | T     | AA             | T    | T         | T    | A        | T    | T    | T     | G    | G   | T      | T      | T     | T   | A    | C   | T   | A   | T    | T     | A   | G   | T   | G    | T   | T  | T   | G    | T   | T   | T   | T |     |

## SARS-CoV-2 &amp; T4.apr

|                        |         |             |       |        |       |         |        |       |         |        |              |
|------------------------|---------|-------------|-------|--------|-------|---------|--------|-------|---------|--------|--------------|
|                        |         | Section 932 |       |        |       |         |        |       |         |        |              |
|                        |         | (89377)     | 89377 | 89386  | 89397 | 89408   | 89419  | 89430 | 89441   | 89452  | 89472        |
| T4 NC_000866.4         | (89197) | CG          | ATAG  | CGT    | ATTT  | GAGCATG | GTGACA | TTAT  | CAATAT  | CAC    | CTGGTT--TAAT |
| SARS-CoV-2 NC_045512.2 | (7023)  | TA          | ATGT  | CTA    | ATTT  | AGGCATG | C---C  | TTCTT | ACTGT   | --A    | CTGGTTACAGAG |
|                        |         | Section 933 |       |        |       |         |        |       |         |        |              |
|                        |         | (89473)     | 89473 | 89485  | 89496 | 89507   | 89518  | 89529 | 89540   | 89551  | 89568        |
| T4 NC_000866.4         | (89791) | ACT         | GAT   | TAATCT | CTA   | TGTA    | TCG    | CAAG  | GACC--  | TGG    | AGTAGATATTT  |
| SARS-CoV-2 NC_045512.2 | (7113)  | CTG         | GT    | CTATA  | CT    | TGTA    | GTG    | TTT   | GTCTTAG | TGG    | TTTAGATTC    |
|                        |         | Section 934 |       |        |       |         |        |       |         |        |              |
|                        |         | (89569)     | 89569 | 89584  | 89595 | 89606   | 89617  | 89628 | 89639   | 89650  | 89664        |
| T4 NC_000866.4         | (89385) | AAG         | CAG   | TTCAAT | CTT   | ATCA    | CGC    | GCA   | TTT     | AATGCT | GTTTCA       |
| SARS-CoV-2 NC_045512.2 | (7200)  | CAT         | CTT   | TTA    | AAT   | GGG     | ATT    | TA    | ACT     | GCT    | TTTGGCTTAG   |
|                        |         | Section 935 |       |        |       |         |        |       |         |        |              |
|                        |         | (89665)     | 89665 | 89672  | 89683 | 89694   | 89705  | 89716 | 89727   | 89738  | 89749        |
| T4 NC_000866.4         | (89478) | AT          | CCA   | AAT    | A     | CC      | CTG    | TT    | ACAT    | TAT    | ATGGGATT     |
| SARS-CoV-2 NC_045512.2 | (7296)  | C           | TG    | CA     | -AT   | CA      | TG     | CA    | ATT     | GTT    | TTT          |
|                        |         | Section 936 |       |        |       |         |        |       |         |        |              |
|                        |         | (89761)     | 89761 | 89771  | 89782 | 89793   | 89804  | 89815 | 89826   | 89837  | 89856        |
| T4 NC_000866.4         | (89574) | C           | TAA   | CT     | TTG   | CT      | CT     | AAAT  | AA      | CAA    | CGATTT       |
| SARS-CoV-2 NC_045512.2 | (7371)  | T           | TAA   | TC     | TTG   | TAC     | -AAAT  | GG    | CC      | CGATTT | CAGCT        |
|                        |         | Section 937 |       |        |       |         |        |       |         |        |              |
|                        |         | (89857)     | 89857 | 89870  | 89881 | 89892   | 89903  | 89914 | 89925   | 89936  | 89952        |
| T4 NC_000866.4         | (89670) | ATG         | CTA   | AT     | CT    | CT      | GCAAC  | TG    | AAA     | CA     | GAT          |
| SARS-CoV-2 NC_045512.2 | (7431)  | ---         | C     | -      | AT    | TT      | AT     | TAT   | GTA     | TG     | GAA          |
|                        |         | Section 938 |       |        |       |         |        |       |         |        |              |
|                        |         | (89953)     | 89953 | 89958  | 89969 | 89980   | 89991  | 90002 | 90013   | 90024  | 90048        |
| T4 NC_000866.4         | (89766) | AA          | TCC   | G      | -GTC  | CAAT    | T      | TACA  | CTA     | AT     | TACC         |
| SARS-CoV-2 NC_045512.2 | (7519)  | AA          | CAA   | G      | A     | GTC     | AAT    | G     | TACA    | ACT    | AT           |

## SARS-CoV-2 &amp; T4.apr

|                        |         |             |                             |                                 |                  |               |                   |             |            |               |            |         |         |       |      |
|------------------------|---------|-------------|-----------------------------|---------------------------------|------------------|---------------|-------------------|-------------|------------|---------------|------------|---------|---------|-------|------|
|                        |         | Section 939 |                             |                                 |                  |               |                   |             |            |               |            |         |         |       |      |
|                        |         | (90049)     | 90049                       | 90057                           | 90068            | 90079         | 90090             | 90101       | 90112      | 90123         | 90144      |         |         |       |      |
| T4 NC 000866.4         | (89859) | -AT         | ATTACAGTTTATCGTTGGATAAGGAT  | TGCATAATG-AGTTTAC               | TTAATAATAAAGC-GG | GAGTTATT      | TTCCCGCTTAG       | CCGATT      | TTCTTGGTTT |               |            |         |         |       |      |
| SARS-CoV-2 NC_045512.2 | (7613)  | TGG         | AATTGTGTTAATTGTGATACATTCTG  | TGCTGGTAGTACATTATTAAGTGATGAAGTT | GC               | GAGAGAC       | TTGTCACTA--CAGTT  | AAAAGACCAA  |            |               |            |         |         |       |      |
|                        |         | Section 940 |                             |                                 |                  |               |                   |             |            |               |            |         |         |       |      |
|                        |         | (90145)     | 90145                       | 90156                           | 90167            | 90178         | 90189             | 90200       | 90211      | 90222         | 90240      |         |         |       |      |
| T4 NC 000866.4         | (89957) | TAG         | ACCTAAAACTGGCGACATTGATGTAA  | TGATATCGTCAATCAGTCGGGT          | CAGTGA           | CAATATCT      | CAATTAGCGAAAGGATT | TT--ATGAAC  | CAAC       |               |            |         |         |       |      |
| SARS-CoV-2 NC_045512.2 | (7707)  | TAA         | ATCCT--ACTGA--CAGTCTCT--TAC | ATCGTTGAT-AGT-GTTA              | CAGTGA           | AGAAATGGT     | --TCCATC          | ATCTCTTTAC  | TTTGAT     | AAAGCTGGT     |            |         |         |       |      |
|                        |         | Section 941 |                             |                                 |                  |               |                   |             |            |               |            |         |         |       |      |
|                        |         | (90241)     | 90241                       | 90255                           | 90266            | 90277         | 90288             | 90299       | 90310      | 90321         | 90336      |         |         |       |      |
| T4 NC 000866.4         | (90046) | AT          | AGAAATCAGCTATTAAATGACGTT    | CATAAATTTTTC                    | TATAAAAAGACGT    | TGGCA         | CAATTA            | TTACTAATAAA | ACTGGTGT   | TTC-TCC       | TGAGGGTGT  | TTTC    |         |       |      |
| SARS-CoV-2 NC_045512.2 | (7793)  | CA          | AAAGACTT--ATGAAAGACATTC     | TCTCTCTCATTTTGTTA               | -ACTTAGACA       | ACCTG         | AGAGCTAATAA       | CACTAAAG    | TTCAT--TG  | CCTATTAAT     | TG         |         |         |       |      |
|                        |         | Section 942 |                             |                                 |                  |               |                   |             |            |               |            |         |         |       |      |
|                        |         | (90337)     | 90337                       | 90343                           | 90354            | 90365         | 90376             | 90387       | 90398      | 90409         | 90420      | 90432   |         |       |      |
| T4 NC 000866.4         | (90141) | TCAA        | ACTGATTATGGGCATTTTCTGG      | AACTGTAA                        | CAGACGAT         | TCTCTTCC      | TCGGGT            | TCTCC       | TA-TAC     | GTATTAGTA     | TT-TG      | GTCTTC  | CAGT    |       |      |
| SARS-CoV-2 NC_045512.2 | (7884)  | TT          | ATAGTTT                     | TTGATGGTA---AATCA               | AAATGTGAAGAA     | ATCATCTG      | CAAAATCAGC        | GTCTGTT     | TAC-TAC    | AGT--CAGC     | -TTATG     | TGTCAAC | CCTAT   |       |      |
|                        |         | Section 943 |                             |                                 |                  |               |                   |             |            |               |            |         |         |       |      |
|                        |         | (90433)     | 90433                       | 90442                           | 90453            | 90464         | 90475             | 90486       | 90497      | 90508         | 90528      |         |         |       |      |
| T4 NC 000866.4         | (90235) | T           | CAGCAACA                    | ACTGGAATGAC                     | GGCAATTGAGTT     | TGTGTGCAAAA   | GTTCGCGTT         | CACTACAA    | GAGCTATT   | TGCGTCATT     | TACTGCTAT  | CAATT   | CATAT   |       |      |
| SARS-CoV-2 NC_045512.2 | (7972)  | A           | CTG---TTACTAGATCA--GGCAT    | TAGTGTCTGATG                    | TTGGTGATAGT      | GCGGAAGTT---G | CAGTTAA           | AAATGTTTGAT | TGCTTACGTT | AATAC         | CGTTT      |         |         |       |      |
|                        |         | Section 944 |                             |                                 |                  |               |                   |             |            |               |            |         |         |       |      |
|                        |         | (90529)     | 90529                       | 90541                           | 90552            | 90563         | 90574             | 90585       | 90596      | 90607         | 90624      |         |         |       |      |
| T4 NC 000866.4         | (90331) | AAAGAC      | CATC                        | CAACTGATGGTAG                   | TAAATTAGA        | AGTTAC        | TTATTTAGATAA      | TCAAAA-ACAT | GTATTAA    | GCA           | CATATTCTAC | ATA     | TGGAATA | ACTAT |      |
| SARS-CoV-2 NC_045512.2 | (8060)  | -T----      | CATCAA                      | -----CTTT                       | TA-----ACGTAC    | CAATGG        | AAAAACTCAAAA      | CAC         | TAGTTGC    | AACTGCAG      | AAGCTGA    | ACTTGC  | AAAG    | AATGT |      |
|                        |         | Section 945 |                             |                                 |                  |               |                   |             |            |               |            |         |         |       |      |
|                        |         | (90625)     | 90625                       | 90640                           | 90651            | 90662         | 90673             | 90684       | 90695      | 90706         | 90720      |         |         |       |      |
| T4 NC 000866.4         | (90426) | T           | TCCCAAGAA                   | ATTATATCTG--AGTCTAA             | GCCTGG           | CATATGGTA     | CATGG             | AA          | TTTAT      | TGGGCGCA      | CAAACTGT   | AACTTT  | AGATAA  | T     |      |
| SARS-CoV-2 NC_045512.2 | (8137)  | G           | TCC                         | TTAGACAATGTCTTATCT              | ACTTTTATTTCAGC   | AGCTCGG       | CAAGG             | TTTGT       | TGATT      | CAGATGTA--GAA | ACTAAAGAT  | GT      | TGTTG   | AATG  | TCTT |

## SARS-CoV-2 & T4.apr

|                        |         |                                                                                                       |       |       |       |       |       |       |       |       |       |  |  |  |  |  |  |
|------------------------|---------|-------------------------------------------------------------------------------------------------------|-------|-------|-------|-------|-------|-------|-------|-------|-------|--|--|--|--|--|--|
|                        |         | Section 946                                                                                           |       |       |       |       |       |       |       |       |       |  |  |  |  |  |  |
|                        | (90721) | 90721                                                                                                 | 90728 | 90739 | 90750 | 90761 | 90772 | 90783 | 90794 | 90805 | 90816 |  |  |  |  |  |  |
| T4 NC 000866.4         | (90520) | ACAGTATTTTATCATTTTGAGAGAACAGCATGAGTAATAATACATATCAACACGTTT--CTAATGAATCTCGTTATGTAAAAATTGATCCTACCGA      |       |       |       |       |       |       |       |       |       |  |  |  |  |  |  |
| SARS-CoV-2 NC_045512.2 | (8231)  | AAATGTGTCAACATCAATCTGACATAGAAG--TTACTGGCGATAGTTGTAAATAACTATATGCTCACCTATAACAAAGTTGAAAAACA              |       |       |       |       |       |       |       |       |       |  |  |  |  |  |  |
|                        |         | Section 947                                                                                           |       |       |       |       |       |       |       |       |       |  |  |  |  |  |  |
|                        | (90817) | 90817                                                                                                 | 90827 | 90838 | 90849 | 90860 | 90871 | 90882 | 90893 | 90912 |       |  |  |  |  |  |  |
| T4 NC 000866.4         | (90614) | TACGAATTTTCCAGCGGAGATTACTG-A-TGTTACAGCTGCTATATAGCAGGCATTTCTCTGCTGCTGGAAGTAAATGGAGTTCCTGATGCATCGTCAACA |       |       |       |       |       |       |       |       |       |  |  |  |  |  |  |
| SARS-CoV-2 NC_045512.2 | (8324)  | GAC---CTTGGTGCTTGATTTGACTGTAGTGCCTGCTCATTAATGC-GCAGGTAGCAAAAAGTCAACAACATGTCTTTGATATGGAACGTAAAGA       |       |       |       |       |       |       |       |       |       |  |  |  |  |  |  |
|                        |         | Section 948                                                                                           |       |       |       |       |       |       |       |       |       |  |  |  |  |  |  |
|                        | (90913) | 90913                                                                                                 | 90926 | 90937 | 90948 | 90959 | 90970 | 90981 | 90992 | 91008 |       |  |  |  |  |  |  |
| T4 NC 000866.4         | (90708) | ACAAAGGGGAATTCTATTTATTTCACACTGAAACAGGAAGT-TATAGATGGAACTAAATAATCCAAAGCAGTTACACCAGCAACGTTTGCAACAAAGATT  |       |       |       |       |       |       |       |       |       |  |  |  |  |  |  |
| SARS-CoV-2 NC_045512.2 | (8416)  | TTTCTATGTCATTGTCTGAACAACTACGAACAAATAACGTAGTGCTGCTAAAAGGAATAACCTTACGTTTAA---AGTTGACATGTGCAAC-----      |       |       |       |       |       |       |       |       |       |  |  |  |  |  |  |
|                        |         | Section 949                                                                                           |       |       |       |       |       |       |       |       |       |  |  |  |  |  |  |
|                        | (91009) | 91009                                                                                                 | 91014 | 91025 | 91036 | 91047 | 91058 | 91069 | 91080 | 91091 | 91104 |  |  |  |  |  |  |
| T4 NC 000866.4         | (90803) | ATCTTATCCAAATGCAACTGAAACGTGTTTACGGATTAACAAATATTTCAAACCAATGATGAAGCCATTGCGCGGAATTAAATAATGAATCTTCTATAAC  |       |       |       |       |       |       |       |       |       |  |  |  |  |  |  |
| SARS-CoV-2 NC_045512.2 | (8503)  | ----TAT-----CTAGACAAAGTTGTTAATGTTGTAACAAACAAAGATAGCACTTAAGGGTGGA---AAATTGTTAAATAATTGG--TTGAAGCAG      |       |       |       |       |       |       |       |       |       |  |  |  |  |  |  |
|                        |         | Section 950                                                                                           |       |       |       |       |       |       |       |       |       |  |  |  |  |  |  |
|                        | (91105) | 91105                                                                                                 | 91113 | 91124 | 91135 | 91146 | 91157 | 91168 | 91179 | 91200 |       |  |  |  |  |  |  |
| T4 NC 000866.4         | (90899) | TCCAGCTAAATTTACGTGTCGCCCTTAATAAATGCGTTTGAAACGCGAGTTTCAACTGAATCC--TCAAATG--GTGTTATTAAATAATTTTATCTCTAC  |       |       |       |       |       |       |       |       |       |  |  |  |  |  |  |
| SARS-CoV-2 NC_045512.2 | (8582)  | TT-AATTAAGTTACACTTGTGTTTCTTTTGTGTCGCTATTTTCTATTTTAACTGTTCAATGTTCATGTCTAAACATCTGACTTTTCAAG             |       |       |       |       |       |       |       |       |       |  |  |  |  |  |  |
|                        |         | Section 951                                                                                           |       |       |       |       |       |       |       |       |       |  |  |  |  |  |  |
|                        | (91201) | 91201                                                                                                 | 91212 | 91223 | 91234 | 91245 | 91256 | 91267 | 91278 | 91296 |       |  |  |  |  |  |  |
| T4 NC 000866.4         | (90991) | CGCAAGCATTAGCTGGTGACAGATGATACCTACTGCAATGACTCCATTAAAAACA-CAGCAGTTAGCTATTAAATTAATTGCGCAAAATGCTCCTTTCT   |       |       |       |       |       |       |       |       |       |  |  |  |  |  |  |
| SARS-CoV-2 NC_045512.2 | (8677)  | TGAAATCA-TAGGATACAAGGCTATTGATGGTGGTCTACTCGTGACATAGCATCTACAGATACTTGTTTTCGTTAAACA---AACATGCTGATTTT      |       |       |       |       |       |       |       |       |       |  |  |  |  |  |  |
|                        |         | Section 952                                                                                           |       |       |       |       |       |       |       |       |       |  |  |  |  |  |  |
|                        | (91297) | 91297                                                                                                 | 91311 | 91322 | 91333 | 91344 | 91355 | 91366 | 91377 | 91392 |       |  |  |  |  |  |  |
| T4 NC 000866.4         | (91086) | GAAACACAGCTACCGGAATCGGACCAAGGTGTTGTTCAATTAGCAACAGTAGCGCAGGTTTCTGTCAGGGGAACCTTTAAGAAGGCTATGCAATTTCT    |       |       |       |       |       |       |       |       |       |  |  |  |  |  |  |
| SARS-CoV-2 NC_045512.2 | (8768)  | GACACATGGTTTAGCGCAG-----CGTGGTGTAGTTA--TACTAA---TGACAAAGCTTGCCCATTT-----GA--TTGCT--GCA---GT           |       |       |       |       |       |       |       |       |       |  |  |  |  |  |  |



## SARS-CoV-2 &amp; T4.apr

|                        |         |                                                                                                     |       |       |       |       |       |       |       |       |       |  |
|------------------------|---------|-----------------------------------------------------------------------------------------------------|-------|-------|-------|-------|-------|-------|-------|-------|-------|--|
| Section 953            |         |                                                                                                     |       |       |       |       |       |       |       |       |       |  |
|                        | (91393) | 91393                                                                                               | 91399 | 91410 | 91421 | 91432 | 91443 | 91454 | 91465 | 91476 | 91488 |  |
| T4 NC_000866.4         | (91182) | CCTTATACGTTTATGAATTCATCTTCTACTGAAGAATAATAAAGGCATAATTAAATTAGGAACACAATCA-GAAGTTAACTCGAATAATGCTTCTGT   |       |       |       |       |       |       |       |       |       |  |
| SARS-CoV-2 NC_045512.2 | (8836)  | CATAACAAG---A-GAAGT-GGGTTTGTCTGTCGTGCCTGGTTTGCTGCGACGATATTACGCACA-ACATAATG--GTGACTTTTTGCATTCTTACCT  |       |       |       |       |       |       |       |       |       |  |
| Section 954            |         |                                                                                                     |       |       |       |       |       |       |       |       |       |  |
|                        | (91489) | 91489                                                                                               | 91498 | 91509 | 91520 | 91531 | 91542 | 91553 | 91564 |       | 91584 |  |
| T4 NC_000866.4         | (91277) | TGCGGTTACTGGCGCAACTCTTAAATGGTCTGTGGTTCACGACGTCATGAGAGGCGTAGTTAAATTAACTACAACCGCGGTTTACACAGGTGGAGG    |       |       |       |       |       |       |       |       |       |  |
| SARS-CoV-2 NC_045512.2 | (8924)  | AGAGTTTTTAG-TGCAGTTGGTAAATCATCTGTACACACATCAAAACTTATAG-AGTACACTGACT--TTGCAACATCAGCTT----GTGTTTTGG    |       |       |       |       |       |       |       |       |       |  |
| Section 955            |         |                                                                                                     |       |       |       |       |       |       |       |       |       |  |
|                        | (91585) | 91585                                                                                               | 91597 | 91608 | 91619 | 91630 | 91641 | 91652 | 91663 |       | 91680 |  |
| T4 NC_000866.4         | (91373) | CGATGCTTCATCAGCCTTAGCTTTGGAATGCTGACGTATTCAGCAAAGAGGTGGTCAAATTATCTATGGAACACTCC-GCATT-GAA--GACACA-    |       |       |       |       |       |       |       |       |       |  |
| SARS-CoV-2 NC_045512.2 | (9012)  | C--TGCTGAATGTACAAATTTTAAAGATGCTTCTGGTAAGC--C--AG----TACCATATTGT-TATG--ATACCAATGTACTAGAAAGGTTCTGTT   |       |       |       |       |       |       |       |       |       |  |
| Section 956            |         |                                                                                                     |       |       |       |       |       |       |       |       |       |  |
|                        | (91681) | 91681                                                                                               | 91696 | 91707 | 91718 | 91729 | 91740 | 91751 | 91762 |       | 91776 |  |
| T4 NC_000866.4         | (91464) | -TTTCAATAGCTAATGGTGGAGCAAATATTTACGGGTACCGTCAGCAATGACTGGCGGTTATATTCAAGGTAAACCGCATCTCTAACACAAAATGAAAT |       |       |       |       |       |       |       |       |       |  |
| SARS-CoV-2 NC_045512.2 | (9095)  | GCCTTATGAAGTTTACGCCCTGACACACGTTATGTGCTCA---TGATGCGCT--CTATTATT-----CAATTCTCTAAC-----                |       |       |       |       |       |       |       |       |       |  |
| Section 957            |         |                                                                                                     |       |       |       |       |       |       |       |       |       |  |
|                        | (91777) | 91777                                                                                               | 91784 | 91795 | 91806 | 91817 | 91828 | 91839 | 91850 | 91861 | 91872 |  |
| T4 NC_000866.4         | (91559) | TGATAGAACTATTTCCTGTCTGGAGCTATTTATGATGTGGCCGCTGATAGTCTTCTCTAGTGATGCTTGGCGCTTCTGCCATGTGTGAACTGTTTCAGC |       |       |       |       |       |       |       |       |       |  |
| SARS-CoV-2 NC_045512.2 | (9164)  | -----ACCTACC-----TTGAAGGTTCTGTTAGAGTGGTAAACAACTTTTGATTCT---GAGTACTGTAGGCACGGCACCTGTGAAAGATCAGAGC    |       |       |       |       |       |       |       |       |       |  |
| Section 958            |         |                                                                                                     |       |       |       |       |       |       |       |       |       |  |
|                        | (91873) | 91873                                                                                               | 91883 | 91894 | 91905 | 91916 | 91927 | 91938 | 91949 |       | 91968 |  |
| T4 NC_000866.4         | (91655) | GTCAGATTGTCCATTATATGCTTTCAGAAATTGGA---A-CAAGATATGCGGAAACCCATCAAAATCCTGGAATTGCCTGACATGCGTGGTCTTTTGT  |       |       |       |       |       |       |       |       |       |  |
| SARS-CoV-2 NC_045512.2 | (9247)  | TGGTGTTTGTGTATCTACTAGTGGTAGATGGTACTTAACA----ATGATTATTACAGATCTTTACAGGA--GTTT--TCGT--TGGTGTAGAT-      |       |       |       |       |       |       |       |       |       |  |
| Section 959            |         |                                                                                                     |       |       |       |       |       |       |       |       |       |  |
|                        | (91969) | 91969                                                                                               | 91982 | 91993 | 92004 | 92015 | 92026 | 92037 | 92048 |       | 92064 |  |
| T4 NC_000866.4         | (91747) | TTCTGTTCTGCTCGTGTCTCTCACTTAACAAATCCAAATGTTAATGGTAATGACCAAT--TTGGTAAACCTAGATTAGGTGTAGGTTGTACCGG      |       |       |       |       |       |       |       |       |       |  |
| SARS-CoV-2 NC_045512.2 | (9332)  | -----GCTGTAAATTTACTTAATAATGTTTA-----CACCACATAAT--TCAACCTA-TT--GGTGC-----TT                          |       |       |       |       |       |       |       |       |       |  |

SARS-CoV-2 & T4.apr

|                                          |         |        |            |          |          |          |          |         |           |           |             |         |           |           |              |        |          |          |           |        |
|------------------------------------------|---------|--------|------------|----------|----------|----------|----------|---------|-----------|-----------|-------------|---------|-----------|-----------|--------------|--------|----------|----------|-----------|--------|
| Section 960                              |         |        |            |          |          |          |          |         |           |           |             |         |           |           |              |        |          |          |           |        |
| T4 NC 000866.4<br>SARS-CoV-2 NC_045512.2 | (92065) | 92065  | 92070      | 92081    | 92092    | 92103    | 92114    | 92125   | 92136     | 92147     | 92160       |         |           |           |              |        |          |          |           |        |
|                                          | (91841) | TGGAT  | ATGTTGGTGA | AGTACA   | GATACAC  | AGATG    | TCTT-AT  | CA      | TAAACAT   | GCTGGTGG  | ATT         | TGGTGA  | GCAT      | GAT       | TGATCTGGGGGC | ATT    | CGGT     | TAATA    |           |        |
|                                          | (9387)  | TGGACA | -----TATC  | AG--CATC | TATAGTAG | CTGGT    | AT       | TGTAGCT | ATCGTAGTA | -ACATG    | CCTTGCCT    | ACT     | T-----    | ATT       | TTAT         | GAGG   |          |          |           |        |
| Section 961                              |         |        |            |          |          |          |          |         |           |           |             |         |           |           |              |        |          |          |           |        |
| T4 NC 000866.4<br>SARS-CoV-2 NC_045512.2 | (92161) | 92161  | 92169      | 92180    | 92191    | 92202    | 92213    | 92224   | 92235     | 92256     |             |         |           |           |              |        |          |          |           |        |
|                                          | (91936) | CCCG   | TAGATC     | AAA      | TTTTGT   | TG       | GTACAC   | GTAA    | AGGAC     | TTGACT    | GGGATA      | ACCGT   | TTCATAC   | TTCA      | CCAATG       | ACGGAT | ATGAAAT  | TGACC    | CAGAA     | TCAC   |
|                                          | (9464)  | TT--   | TAGAGAGC   | TTTTG    | G        | TGAATACA | GT       | CATGTAG | TTGCT     | TTAATA    | -CTT        | T--ACTA | TTT       | -CTT      | ATGT         | CATTC  | ACTGT    | ACT      | ----CTGTT | TAC    |
| Section 962                              |         |        |            |          |          |          |          |         |           |           |             |         |           |           |              |        |          |          |           |        |
| T4 NC 000866.4<br>SARS-CoV-2 NC_045512.2 | (92257) | 92257  | 92268      | 92279    | 92290    | 92301    | 92312    | 92323   | 92334     | 92352     |             |         |           |           |              |        |          |          |           |        |
|                                          | (92032) | AAC    | GAAATT     | CCAAT    | TATACA   | TTAAAT   | CGTCC    | TGAATT  | TAA       | TTGGAAAT  | GAAACAC     | GTCCAT  | TGGA      | ACATT     | TCTTT        | AAAC   | TACATA   | TAAT     | TAGGT     | TAAAAG |
|                                          | (9550)  | ACC--  | AGTT--TAC  | T        | CATTC    | TTA      | CC       | TGTGT   | TTAT      | CTGT      | TTAT-----TT | ACTT    | GTACT     | TG--ACATT | --TT         | -ATCT  | TAC-TAAT | GATGTT   | TCTTT     |        |
| Section 963                              |         |        |            |          |          |          |          |         |           |           |             |         |           |           |              |        |          |          |           |        |
| T4 NC 000866.4<br>SARS-CoV-2 NC_045512.2 | (92353) | 92353  | 92367      | 92378    | 92389    | 92400    | 92411    | 92422   | 92433     | 92448     |             |         |           |           |              |        |          |          |           |        |
|                                          | (92128) | AA     | TGACAG     | ATATT    | GTACT    | GAAT     | GACTT    | -ACCAT  | TTG       | TTGAC     | GGCCCT      | CTCTG   | CAGAGGGCC | CAGAGCCGC | ATTTCC       | TGGATT | AAAA     | AACGG    | CGAAG     | AA     |
|                                          | (9631)  | TT     | TAGCAC     | ATATT    | CAGTG    | GATG     | TTAT     | GTTCAC  | AGCTTT    | TAGTAC    | CTTT        | CTGGA   | TACAAATT  | GCT-TAT   | ATCATT       | TGTATT | TCCA     | ----CA   | AAGCAT    |        |
| Section 964                              |         |        |            |          |          |          |          |         |           |           |             |         |           |           |              |        |          |          |           |        |
| T4 NC 000866.4<br>SARS-CoV-2 NC_045512.2 | (92449) | 92449  | 92455      | 92466    | 92477    | 92488    | 92499    | 92510   | 92521     | 92532     | 92544       |         |           |           |              |        |          |          |           |        |
|                                          | (92223) | TAT    | TAGGAG     | CTGAC    | CACAC    | AGTA     | TGGAG    | TGAAG   | GCTCA     | ATGAA     | TAGAC       | -TAC    | GGTTTC    | TGTACT    | TAGAAAT      | TTGAAG | ----     | TTCTTGAT | TAAAA     |        |
|                                          | (9722)  | TTC    | TATTG      | GT--C    | -TTT     | AGTA     | ATTACC   | TAAAG   | ---AG     | ACGTG     | TAGTCTT     | TAA     | TGGTGT    | TTCTT     | TAGTACT      | TTGAAG | AAGC     | TGCGCTG  | TGCACC    |        |
| Section 965                              |         |        |            |          |          |          |          |         |           |           |             |         |           |           |              |        |          |          |           |        |
| T4 NC 000866.4<br>SARS-CoV-2 NC_045512.2 | (92545) | 92545  | 92554      | 92565    | 92576    | 92587    | 92598    | 92609   | 92620     | 92640     |             |         |           |           |              |        |          |          |           |        |
|                                          | (92314) | CA     | TTGGAAT    | ACTTAA   | AAACAT   | CTTTAG   | AAA      | CCGCAAA | TAGTGAT   | ATTAA     | AAC         | AATTC   | ----AGGGC | ATCT      | TAGAT        | GTAT-- | CTGGT    | GATATT   | GAGC      |        |
|                                          | (9812)  | TT     | TTTGT      | TAAATA   | AAAGAA   | TGTAT    | CTAAA    | GT-TGCG | TAGTGAT   | GTGCT     | ATTACC      | TC      | TTACGCAAT | ATAA      | TAGAT        | ACTTAG | CTCTTT   | ATAATA   | AGTA      |        |
| Section 966                              |         |        |            |          |          |          |          |         |           |           |             |         |           |           |              |        |          |          |           |        |
| T4 NC 000866.4<br>SARS-CoV-2 NC_045512.2 | (92641) | 92641  | 92653      | 92664    | 92675    | 92686    | 92697    | 92708   | 92719     | 92736     |             |         |           |           |              |        |          |          |           |        |
|                                          | (92404) | TTT    | GGCCCAA    | ATAGG    | TATCAA   | --TAAAA  | GGATAT   | TTCTGA  | CCTCA     | AAAC      | GCTA        | ACCA    | GTGA      | ACAC      | CAGAAATAT    | TAAATG | GAACT    | AATAA    | TACG      |        |
|                                          | (9907)  | CAA    | G          | TATTTT   | AGTGG    | -AGCAA   | TGGATACA | ACTAGCT | TACAGA    | GAG--AGCT | GCTT        | GTTT    | -GT       | CATCT     | CGCAAGGCTC   | TCAATG | ACTTC    | AGTAA    | CTCA      |        |

## SARS-CoV-2 &amp; T4.apr

|                        |         |             |         |          |         |             |             |                 |                    |                |                  |                        |                |          |         |        |         |      |         |       |         |         |       |           |     |      |      |     |      |      |     |      |     |      |     |     |     |
|------------------------|---------|-------------|---------|----------|---------|-------------|-------------|-----------------|--------------------|----------------|------------------|------------------------|----------------|----------|---------|--------|---------|------|---------|-------|---------|---------|-------|-----------|-----|------|------|-----|------|------|-----|------|-----|------|-----|-----|-----|
|                        |         | Section 967 |         |          |         |             |             |                 |                    |                |                  |                        |                |          |         |        |         |      |         |       |         |         |       |           |     |      |      |     |      |      |     |      |     |      |     |     |     |
|                        |         | (92737)     | 92737   | 92752    | 92763   | 92774       | 92785       | 92796           | 92807              | 92818          | 92832            |                        |                |          |         |        |         |      |         |       |         |         |       |           |     |      |      |     |      |      |     |      |     |      |     |     |     |
| T4 NC_000866.4         | (92498) | GT          | TGACAG  | TATTCCTT | GC      | CGATATTGGTC | CATTTAA     | CGCCGAGGC       | CAACTCTGTATACAGAAC | GATCAGAAATGATT | TACTGTGGATAAAGC  | GTGAA                  |                |          |         |        |         |      |         |       |         |         |       |           |     |      |      |     |      |      |     |      |     |      |     |     |     |
| SARS-CoV-2 NC_045512.2 | (9998)  | GG          | TCTGAT  | TGTTCTTT | TAC     | CAACCACC-A  | CAAACCT     | CTATCACTCAGCTGT | -TTTG              | CAGAGTGGTTTT   | AGA-AAA          | TGGCATTCCC             | ATCTG          | GTAAA    |         |        |         |      |         |       |         |         |       |           |     |      |      |     |      |      |     |      |     |      |     |     |     |
|                        |         | Section 968 |         |          |         |             |             |                 |                    |                |                  |                        |                |          |         |        |         |      |         |       |         |         |       |           |     |      |      |     |      |      |     |      |     |      |     |     |     |
|                        |         | (92833)     | 92833   | 92840    | 92851   | 92862       | 92873       | 92884           | 92895              | 92906          | 92917            | 92928                  |                |          |         |        |         |      |         |       |         |         |       |           |     |      |      |     |      |      |     |      |     |      |     |     |     |
| T4 NC_000866.4         | (92594) | C           | TTG     | GACAA    | TACACT  | GGT         | CAAGATATTAA | TGGTCTTCT       | CTGTGTGTAGGAAAT    | CCTAGT-AG      | TGGAA            | TGA-AGCATCGCATTTATTAAT | AAT-AC         | TGAT     |         |        |         |      |         |       |         |         |       |           |     |      |      |     |      |      |     |      |     |      |     |     |     |
| SARS-CoV-2 NC_045512.2 | (10091) | G           | TTG     | AGGGT    | TGTATG  | GTA         | CAAGTAAC    | TTGTGG---       | TACAAC             | TACAC---       | TTAACG           | GTCTTTGGCT             | TGATGACGTAGTTT | TACTGTCC | AAGACA  | TGTG   |         |      |         |       |         |         |       |           |     |      |      |     |      |      |     |      |     |      |     |     |     |
|                        |         | Section 969 |         |          |         |             |             |                 |                    |                |                  |                        |                |          |         |        |         |      |         |       |         |         |       |           |     |      |      |     |      |      |     |      |     |      |     |     |     |
|                        |         | (92929)     | 92929   | 92939    | 92950   | 92961       | 92972       | 92983           | 92994              | 93005          | 93024            |                        |                |          |         |        |         |      |         |       |         |         |       |           |     |      |      |     |      |      |     |      |     |      |     |     |     |
| T4 NC_000866.4         | (92687) | G           | TCAT    | CAC      | TCGCAGG | GAATAC      | GTTTAAG     | CGAATTA         | GAAACAAA           | ATTTAT         | TGAATCTGATGTAGGT | TCTTTGACCA             | TTG----        | AAGT     | TGGTAAT | CT     |         |      |         |       |         |         |       |           |     |      |      |     |      |      |     |      |     |      |     |     |     |
| SARS-CoV-2 NC_045512.2 | (10181) | A           | TC      | TG       | CAC     | TC          | TGAAGAC     | ATGC            | -TTAAC             | CTAATTA        | TGAAG---         | ATTTA                  | CTCAT          | TCGTAA   | AGTCTAA | TCATAA | TTTC    | TTG  | GTAC    | AGGC  | TGGTAAT | GT      |       |           |     |      |      |     |      |      |     |      |     |      |     |     |     |
|                        |         | Section 970 |         |          |         |             |             |                 |                    |                |                  |                        |                |          |         |        |         |      |         |       |         |         |       |           |     |      |      |     |      |      |     |      |     |      |     |     |     |
|                        |         | (93025)     | 93025   | 93038    | 93049   | 93060       | 93071       | 93082           | 93093              | 93104          | 93120            |                        |                |          |         |        |         |      |         |       |         |         |       |           |     |      |      |     |      |      |     |      |     |      |     |     |     |
| T4 NC_000866.4         | (92779) | TC          | GTGAAGA | GCTT     | GGACCG  | AAACC       | ACCA        | TCAT            | TTTCA              | AGAAC          | GT               | TTA                    | TAGT           | CGT      | TTAAA   | TGA    | AATT    | GAC  | ACTAAAC | AGACA | AC      | CAGT    | TGAGT | CTGA      |     |      |      |     |      |      |     |      |     |      |     |     |     |
| SARS-CoV-2 NC_045512.2 | (10273) | TC          | AACTCAG | GGTT     | -----   | ATTGG       | ACAT        | TC              | TAT                | GC             | AAA              | ATTGT                  | GT             | ACT      | TAAG    | GT     | TAAAGGT | TGA  | TACAG   | CCAT  | CC      | TAAGACA | -C--  | TAAGTATAA |     |      |      |     |      |      |     |      |     |      |     |     |     |
|                        |         | Section 971 |         |          |         |             |             |                 |                    |                |                  |                        |                |          |         |        |         |      |         |       |         |         |       |           |     |      |      |     |      |      |     |      |     |      |     |     |     |
|                        |         | (93121)     | 93121   | 93126    | 93137   | 93148       | 93159       | 93170           | 93181              | 93192          | 93203            | 93216                  |                |          |         |        |         |      |         |       |         |         |       |           |     |      |      |     |      |      |     |      |     |      |     |     |     |
| T4 NC_000866.4         | (92875) | CA          | TTAG    | TGCT     | ATT     | AAG         | CCTC        | AATAGGA         | TATC               | CAG            | GAAATAA          | TT                     | CGATT          | AT       | CAC     | GAGT   | GTT     | AA   | TACAAAC | ----- | AC      | TGAT    | AAT   | AT        | TG  | CA   | TCTA |     |      |      |     |      |     |      |     |     |     |
| SARS-CoV-2 NC_045512.2 | (10360) | GT          | TT      | GT       | TC      | GC          | ATT         | CAAC            | CAGG               | AC             | AGACT            | TTTT                   | CAG            | TG----   | TTAG    | CTT    | GT      | TAC  | AA      | TG    | GTT     | CAC     | -CAT  | CT        | GGT | GTTT | AC   | --- | C    | AAT  | GT  | ---- | CTA |      |     |     |     |
|                        |         | Section 972 |         |          |         |             |             |                 |                    |                |                  |                        |                |          |         |        |         |      |         |       |         |         |       |           |     |      |      |     |      |      |     |      |     |      |     |     |     |
|                        |         | (93217)     | 93217   | 93225    | 93236   | 93247       | 93258       | 93269           | 93280              | 93291          | 93312            |                        |                |          |         |        |         |      |         |       |         |         |       |           |     |      |      |     |      |      |     |      |     |      |     |     |     |
| T4 NC_000866.4         | (92964) | TTA         | ATTTA   | GAG      | CTAAA   | TCA         | AAGT        | GG              | AGG                | TAT            | TAA              | AC                     | AG             | CGT      | TTAAC   | -CG    | TTA     | TG   | AAA     | CT    | TCCAT   | TGGT    | TC    | GAT       | TGA | TAT  | TTC  | CT  | T    | C    | GAG | TAT  | TAA |      |     |     |     |
| SARS-CoV-2 NC_045512.2 | (10443) | TGA         | G       | ---      | GCC     | CA          | ATT         | TCA             | CTA                | TAA            | AGG              | GT                     | TC             | ATT      | C       | -----  | C       | ---  | TTA     | ATG   | GTT     | CA      | TGT   | GGT       | TAG | TGTT | GTTT | TA  | --   | AC   | ATA | GAT  | TAT | G    | ACT |     |     |
|                        |         | Section 973 |         |          |         |             |             |                 |                    |                |                  |                        |                |          |         |        |         |      |         |       |         |         |       |           |     |      |      |     |      |      |     |      |     |      |     |     |     |
|                        |         | (93313)     | 93313   | 93324    | 93335   | 93346       | 93357       | 93368           | 93379              | 93390          | 93408            |                        |                |          |         |        |         |      |         |       |         |         |       |           |     |      |      |     |      |      |     |      |     |      |     |     |     |
| T4 NC_000866.4         | (93059) | GGT         | CAAA    | TC       | AAA     | ---         | GATA        | AT              | CA                 | ACT            | TCA              | AT                     | CGA            | AT       | CT      | TAA    | A       | TGGA | AT      | CGTC  | GG      | TG      | AAA   | AC        | ACT | TC   | AT   | CT  | GG   | CTTA | AG  | AG   | CG  | AATG | TTT | CAT | TGG |
| SARS-CoV-2 NC_045512.2 | (10521) | GT          | GTC     | --       | TC      | TTTTT       | GTTAC       | AT              | G                  | CAC            | CATA             | --                     | TG             | GAAT     | TAC     | CAAC   | TGGA    | GT   | TCAT    | GCTG  | -GCA    | -----   | CAG   | ACTTA     | GAG | AG   | GT   | AAC | TTTT | AT   | TGG |      |     |      |     |     |     |

## SARS-CoV-2 &amp; T4.apr

|                        |         |          |      |       |       |         |      |       |       |       |      |             |        |       |       |       |        |       |         |       |       |       |       |       |      |      |      |      |      |     |      |      |      |      |      |     |     |     |     |      |     |    |
|------------------------|---------|----------|------|-------|-------|---------|------|-------|-------|-------|------|-------------|--------|-------|-------|-------|--------|-------|---------|-------|-------|-------|-------|-------|------|------|------|------|------|-----|------|------|------|------|------|-----|-----|-----|-----|------|-----|----|
|                        |         |          |      |       |       |         |      |       |       |       |      | Section 974 |        |       |       |       |        |       |         |       |       |       |       |       |      |      |      |      |      |     |      |      |      |      |      |     |     |     |     |      |     |    |
|                        | (93409) | 93409    |      | 93423 |       | 93434   |      | 93445 |       | 93456 |      | 93467       |        | 93478 |       | 93489 |        | 93504 |         |       |       |       |       |       |      |      |      |      |      |     |      |      |      |      |      |     |     |     |     |      |     |    |
| T4 NC_000866.4         | (93152) | TTAAACCA | AAT  | TGTTG | GAAC  | T--GATT | CTAG | GGTGG | ACAA  | CC    | TTCT | CTC         | CTGGGT | CT-CT | TTTAA | ACCGA | --GTTT | CTAC  | --AATTG | -AAAC | CTT   |       |       |       |      |      |      |      |      |     |      |      |      |      |      |     |     |     |     |      |     |    |
| SARS-CoV-2 NC_045512.2 | (10603) | -----    | ACC  | TTTG  | ---T  | GTAC    | AGG  | CAAC  | AGC-- | ACAA  | G    | CAG         | CTGG   | TAGG  | ACAC  | AACT  | ATTAC  | AGTT  | AAT     | GTTT  | TAGC  | TTGG  | TTG   | T     | ACG  | CT   | G    |      |      |     |      |      |      |      |      |     |     |     |     |      |     |    |
|                        |         |          |      |       |       |         |      |       |       |       |      | Section 975 |        |       |       |       |        |       |         |       |       |       |       |       |      |      |      |      |      |     |      |      |      |      |      |     |     |     |     |      |     |    |
|                        | (93505) | 93505    |      | 93511 |       | 93522   |      | 93533 |       | 93544 |      | 93555       |        | 93566 |       | 93577 |        | 93588 |         | 93600 |       |       |       |       |      |      |      |      |      |     |      |      |      |      |      |     |     |     |     |      |     |    |
| T4 NC_000866.4         | (93240) | CTGTT    | TC   | AGG   | CTTGA | AT      | AAC  | GTG   | TTC   | AA    | AAC  | CT          | ACA    | AGTAG | AG    | TTGG  | TAAT   | AC    | AGCGC   | AGG   | AAT   | TAAA  | GGGC  | AAG   | T-T  | GTA  | GCG  | TTA  | AAAT | AC  | T    |      |      |      |      |     |     |     |     |      |     |    |
| SARS-CoV-2 NC_045512.2 | (10686) | CTGTT    | AT   | AAAT  | TGGAG | A       | A    | AGGT  | GGT   | TTC   | TC   | AA          | T      | C     | A     | TTT   | ACC    | ACA   | ACT     | CT    | TAAT  | GAC   | TTT   | --A-- | ACC  | T    | TGT  | GGC  | T    | AT  | GAA  | -GTA | CAA  | TTA  | TGA  | AC  | C   |     |     |      |     |    |
|                        |         |          |      |       |       |         |      |       |       |       |      | Section 976 |        |       |       |       |        |       |         |       |       |       |       |       |      |      |      |      |      |     |      |      |      |      |      |     |     |     |     |      |     |    |
|                        | (93601) | 93601    |      | 93610 |       | 93621   |      | 93632 |       | 93643 |      | 93654       |        | 93665 |       | 93676 |        | 93696 |         |       |       |       |       |       |      |      |      |      |      |     |      |      |      |      |      |     |     |     |     |      |     |    |
| T4 NC_000866.4         | (93335) | TTAGT    | AA   | TG    | GA    | ACTA    | AT   | CCA   | AA    | CG    | GTT  | CA          | ACT    | GTT   | GA    | AG    | AGCG   | GG    | AT      | TAA   | CCA   | ATT   | CAAT  | AAAA  | G    | CT   | TA   | AC   | GA   | AA  | C    | TA   | AC   | AT   | TGC  | AT  | CA  | GT  | T   | T    | ACA |    |
| SARS-CoV-2 NC_045512.2 | (10777) | TCTAAC   | ACAA | GA    | ----- | CCA     | T    | GTT   | GAC   | AT    | ACT  | TAG         | GAC    | CTCT  | TTT   | CT    | GC     | TCAA  | -----   | A     | CTG   | AA    | TT    | GC    | CG   | TTTT | AGA  | TAT  | TGT  | TGC | T    | CA   | T    | T    | AAA  | AA  |     |     |     |      |     |    |
|                        |         |          |      |       |       |         |      |       |       |       |      | Section 977 |        |       |       |       |        |       |         |       |       |       |       |       |      |      |      |      |      |     |      |      |      |      |      |     |     |     |     |      |     |    |
|                        | (93697) | 93697    |      | 93709 |       | 93720   |      | 93731 |       | 93742 |      | 93753       |        | 93764 |       | 93775 |        | 93792 |         |       |       |       |       |       |      |      |      |      |      |     |      |      |      |      |      |     |     |     |     |      |     |    |
| T4 NC_000866.4         | (93431) | CAA      | GAA  | GTGA  | ATA   | CAG     | CT   | AAA   | G     | CA    | AT   | AT          | CTT    | CTT   | TAC   | AA    | GGT    | GAT   | GT      | TCA   | -AG   | CT    | CT    | CCA   | AGA  | AG   | CC   | GGT  | T    | TAT | T    | CT   | GA   | AG   | CT   | CCA | AG  | GA  | A   |      |     |    |
| SARS-CoV-2 NC_045512.2 | (10862) | GAA      | TTA  | ----- | CTG   | CA      | AAA  | T     | G     | T     | AT   | GA          | AT     | GG    | AG    | CT    | -AC    | CA    | --      | TAT   | TG    | GGT   | AGT   | GCT   | TT   | TATT | AGA  | AG   | AT   | GAA | TTT  | TAC  | AC   | CCT  | TTT  | GAT | T   | GTT | --  | GT   |     |    |
|                        |         |          |      |       |       |         |      |       |       |       |      | Section 978 |        |       |       |       |        |       |         |       |       |       |       |       |      |      |      |      |      |     |      |      |      |      |      |     |     |     |     |      |     |    |
|                        | (93793) | 93793    |      | 93808 |       | 93819   |      | 93830 |       | 93841 |      | 93852       |        | 93863 |       | 93874 |        | 93888 |         |       |       |       |       |       |      |      |      |      |      |     |      |      |      |      |      |     |     |     |     |      |     |    |
| T4 NC_000866.4         | (93526) | TGG      | CAA  | GCT   | TAC   | GTT     | CG   | TAA   | AGAT  | GG    | CG   | AA          | TGG    | GTAT  | T     | CC    | TTT    | CT    | AC      | TTTT  | T     | ATCA  | CC    | AG    | CATA | -AC  | AT   | GG   | GG   | CC  | GCA  | AGG  | CCC  | AA   | AGG  | ATT | T   |     |     |      |     |    |
| SARS-CoV-2 NC_045512.2 | (10945) | TAG      | CAA  | TGC   | T     | CAG     | GT   | T     | ACT   | TTT   | --   | CC          | AA     | AGT   | GC    | AGT   | GAAAA  | -GA   | ACA     | ----  | ATCA  | AGG   | T     | AC    | AC   | AC   | CACT | GG   | TT   | GTT | ACT  | CAC  | AA   | TTTT | GACT | T   |     |     |     |      |     |    |
|                        |         |          |      |       |       |         |      |       |       |       |      | Section 979 |        |       |       |       |        |       |         |       |       |       |       |       |      |      |      |      |      |     |      |      |      |      |      |     |     |     |     |      |     |    |
|                        | (93889) | 93889    |      | 93896 |       | 93907   |      | 93918 |       | 93929 |      | 93940       |        | 93951 |       | 93962 |        | 93973 |         | 93984 |       |       |       |       |      |      |      |      |      |     |      |      |      |      |      |     |     |     |     |      |     |    |
| T4 NC_000866.4         | (93621) | TAA      | AT   | G     | T     | CAG     | GAT  | T     | AA    | TCC   | TC   | AGA         | ATC    | CAA   | AG    | GAA   | CT     | CAA   | AGAT    | T     | GT    | CA    | TT    | -C    | TA   | AGA  | CGT  | T    | TAG  | GGG | CT   | CAA  | TT   | ATTA | ATG  | TT  | GAG | TTA | AC  | AC   | C   |    |
| SARS-CoV-2 NC_045512.2 | (11033) | TC       | ACT  | TTT   | TAG   | T       | -TT  | TAG   | TCC   | AG    | AGT  | ACT         | CAA    | T     | -G    | GT    | CT     | TT    | TG      | TCT   | TT    | TTT   | TT    | TG    | TAT  | G    | AAAT | T    | GC   | CT  | TTTT | TAC  | CT   | TT   | TG   | CT  | ATG | G   | -GT | ATTA | TTG | CT |
|                        |         |          |      |       |       |         |      |       |       |       |      | Section 980 |        |       |       |       |        |       |         |       |       |       |       |       |      |      |      |      |      |     |      |      |      |      |      |     |     |     |     |      |     |    |
|                        | (93985) | 93985    |      | 93995 |       | 94006   |      | 94017 |       | 94028 |      | 94039       |        | 94050 |       | 94061 |        | 94080 |         |       |       |       |       |       |      |      |      |      |      |     |      |      |      |      |      |     |     |     |     |      |     |    |
| T4 NC_000866.4         | (93716) | CGA      | TC   | AAA   | TTT   | ACG     | AT   | TG    | TAT   | CCA   | G    | CGT         | GC     | C     | TA    | GAAT  | TATA   | -CGG  | T       | GAAT  | TACCA | TTTTG | AT    | GGAC  | TC   | AA   | TAA  | AGGT | TT   | TC  | -AT  | GT   | TTTT | TAT  | GT   | A   |     |     |     |      |     |    |
| SARS-CoV-2 NC_045512.2 | (11126) | ATG      | TC   | TGC   | TTT   | TGC     | AA   | TG    | ATG   | TTT   | GT   | CAAA        | CATA   | AG    | CA    | T     | GCA    | TTT   | CT      | CTG   | TT    | TGT   | TTTTG | T     | TAC  | CT   | TC   | T    | TGCC | AC  | TG   | TAG  | CT   | TAT  | TTTT | A   | TAT | G   |     |      |     |    |

## SARS-CoV-2 &amp; T4.apr

|                        |         |        |            |       |         |       |         |        |        |         |         |        |        |         |       |        |             |        |        |        |       |     |      |     |      |      |       |     |     |     |     |     |     |     |      |    |     |     |     |     |      |    |    |    |    |      |     |    |    |     |     |     |    |     |    |    |    |   |
|------------------------|---------|--------|------------|-------|---------|-------|---------|--------|--------|---------|---------|--------|--------|---------|-------|--------|-------------|--------|--------|--------|-------|-----|------|-----|------|------|-------|-----|-----|-----|-----|-----|-----|-----|------|----|-----|-----|-----|-----|------|----|----|----|----|------|-----|----|----|-----|-----|-----|----|-----|----|----|----|---|
|                        |         |        |            |       |         |       |         |        |        |         |         |        |        |         |       |        | Section 981 |        |        |        |       |     |      |     |      |      |       |     |     |     |     |     |     |     |      |    |     |     |     |     |      |    |    |    |    |      |     |    |    |     |     |     |    |     |    |    |    |   |
|                        | (94081) | 94081  |            | 94094 |         | 94105 |         | 94116  |        | 94127   |         | 94138  |        | 94149   |       | 94160  |             | 94176  |        |        |       |     |      |     |      |      |       |     |     |     |     |     |     |     |      |    |     |     |     |     |      |    |    |    |    |      |     |    |    |     |     |     |    |     |    |    |    |   |
| T4 NC 000866.4         | (93810) | GGGGAT | GATGAA     | GAAAG | G----   | TACAA | GACCGGA | GTCTTC | GATTTA | AAGA    | GGTTCTA | ACGTAT | TGCA   | AGTAACC | CGCA  | TTTTAC | GCAC        | AAATAT | TG     |        |       |     |      |     |      |      |       |     |     |     |     |     |     |     |      |    |     |     |     |     |      |    |    |    |    |      |     |    |    |     |     |     |    |     |    |    |    |   |
| SARS-CoV-2 NC_045512.2 | (11222) | GTCTAT | ATGCCT     | GCTAG | TTGGGTG | ATGC  | GATTAT  | GACAT  | TGGTT  | TGGATAT | GGTTGAT | AC---- | T---   | AGTTTGT | CTGG  | TTTTA  | AGCTA       | AAAG   | ACTG   |        |       |     |      |     |      |      |       |     |     |     |     |     |     |     |      |    |     |     |     |     |      |    |    |    |    |      |     |    |    |     |     |     |    |     |    |    |    |   |
|                        |         |        |            |       |         |       |         |        |        |         |         |        |        |         |       |        | Section 982 |        |        |        |       |     |      |     |      |      |       |     |     |     |     |     |     |     |      |    |     |     |     |     |      |    |    |    |    |      |     |    |    |     |     |     |    |     |    |    |    |   |
|                        | (94177) | 94177  | 94182      |       | 94193   |       | 94204   |        | 94215  |         | 94226   |        | 94237  |         | 94248 |        | 94259       |        | 94272  |        |       |     |      |     |      |      |       |     |     |     |     |     |     |     |      |    |     |     |     |     |      |    |    |    |    |      |     |    |    |     |     |     |    |     |    |    |    |   |
| T4 NC 000866.4         | (93901) | GGT    | CAATAACATC | TATG  | GATG    | GAAAC | GCTAC   | ATATCC | GTG    | GT      | TTACT   | GA-    | CTTTCT | TTTTAG  | GAA   | TGG    | CTG         | GTAT   | TAATG  | -GC    | GGAAT | TG  | GGA  | AC  | GT   | C    |       |     |     |     |     |     |     |     |      |    |     |     |     |     |      |    |    |    |    |      |     |    |    |     |     |     |    |     |    |    |    |   |
| SARS-CoV-2 NC_045512.2 | (11311) | TGT    | -----      | TATG  | TATG    | CA    | TCA     | GCT    | GTA    | ----    | GTG     | --     | TTACT  | AA      | T     | C      | TTAT        | GAC    | AGC    | AA     | GAA   | CTG | TGTA | T   | ATG  | ATG  | GT    | G   | TC  | T   | AGG | GA  | GT  | G   |      |    |     |     |     |     |      |    |    |    |    |      |     |    |    |     |     |     |    |     |    |    |    |   |
|                        |         |        |            |       |         |       |         |        |        |         |         |        |        |         |       |        | Section 983 |        |        |        |       |     |      |     |      |      |       |     |     |     |     |     |     |     |      |    |     |     |     |     |      |    |    |    |    |      |     |    |    |     |     |     |    |     |    |    |    |   |
|                        | (94273) | 94273  |            | 94281 |         | 94292 |         | 94303  |        | 94314   |         | 94325  |        | 94336   |       | 94347  |             | 94368  |        |        |       |     |      |     |      |      |       |     |     |     |     |     |     |     |      |    |     |     |     |     |      |    |    |    |    |      |     |    |    |     |     |     |    |     |    |    |    |   |
| T4 NC 000866.4         | (93995) | TTG    | TAA        | TAG   | AT      | TTTAT | TGGACCA | AATG   | CCT    | TG      | GAG     | CT     | GA     | TTTA    | GGAT  | AT     | TTTA        | CCCAG  | CTTACC | AGTTAT | TATGG | GA  | AT   | AT  | GCA  | AGA  | TAT-- | G   | C   | T   | C   |     |     |     |      |    |     |     |     |     |      |    |    |    |    |      |     |    |    |     |     |     |    |     |    |    |    |   |
| SARS-CoV-2 NC_045512.2 | (11390) | TGG    | AC         | CTT   | AT      | ----- | G---    | AATG   | TCT    | -TG     | ACA     | CT     | CG     | TTTA    | TAA   | -AG    | TTTA        | TTAT   | G      | GT     | ----  | AA  | TG   | CT  | T    | AG   | --    | AT  | CA  | AG  | C   | ATT | T   | CC  | AT   | G  | T   | G   | G   |     |      |    |    |    |    |      |     |    |    |     |     |     |    |     |    |    |    |   |
|                        |         |        |            |       |         |       |         |        |        |         |         |        |        |         |       |        | Section 984 |        |        |        |       |     |      |     |      |      |       |     |     |     |     |     |     |     |      |    |     |     |     |     |      |    |    |    |    |      |     |    |    |     |     |     |    |     |    |    |    |   |
|                        | (94369) | 94369  |            | 94380 |         | 94391 |         | 94402  |        | 94413   |         | 94424  |        | 94435   |       | 94446  |             | 94464  |        |        |       |     |      |     |      |      |       |     |     |     |     |     |     |     |      |    |     |     |     |     |      |    |    |    |    |      |     |    |    |     |     |     |    |     |    |    |    |   |
| T4 NC 000866.4         | (94089) | T      | CTC        | C     | TAT     | TCC   | AGACT   | TT     | TGG    | T       | TAA     | T      | CAG    | CA      | AA    | TG     | AA          | CAG    | CTC    | AAA    | GTC   | ATG | GG   | AA  | ACT  | T    | CA    | AAA | AT  | TG  | AT  | TT  | A   | AT  | TAT  | C  | GT  | T   | GA  | AAG | C    | TG | G  |    |    |      |     |    |    |     |     |     |    |     |    |    |    |   |
| SARS-CoV-2 NC_045512.2 | (11468) | G      | CTC        | T     | TAT     | AAT   | CTCTG   | TT     | ACT    | T       | CTAA    | CT     | ACT    | CA      | GG    | TG     | T           | AG     | T      | TACA   | AA    | CT  | GTC  | ATG | TTTT | TGGC | CAG   | AG  | G   | TAT | TG  | T   | TTT | AT  | GT   | GT | GT  | T   | GA  | G   | TAT  | TG | C  |    |    |      |     |    |    |     |     |     |    |     |    |    |    |   |
|                        |         |        |            |       |         |       |         |        |        |         |         |        |        |         |       |        | Section 985 |        |        |        |       |     |      |     |      |      |       |     |     |     |     |     |     |     |      |    |     |     |     |     |      |    |    |    |    |      |     |    |    |     |     |     |    |     |    |    |    |   |
|                        | (94465) | 94465  |            | 94479 |         | 94490 |         | 94501  |        | 94512   |         | 94523  |        | 94534   |       | 94545  |             | 94560  |        |        |       |     |      |     |      |      |       |     |     |     |     |     |     |     |      |    |     |     |     |     |      |    |    |    |    |      |     |    |    |     |     |     |    |     |    |    |    |   |
| T4 NC 000866.4         | (94185) | A      | CTA        | AA    | T       | CA    | T       | CA     | T      | TG      | A       | T      | ACA    | AA      | CA    | AA     | AT          | GG     | TTG    | GA     | AT    | A   | CAG  | TAG | GA   | TAT  | G     | AA  | CA  | G   | T   | CG  | TCC | ACA | AG   | A  | TAG | C   | TGG | T   | -CAT | TT | AT | C  | TG | AA   | -CG | AT |    |     |     |     |    |     |    |    |    |   |
| SARS-CoV-2 NC_045512.2 | (11564) | C      | CTA        | TT    | T       | CT    | T       | CA     | T      | AAC     | T       | GG     | T      | AA      | T     | AC     | CT          | TC     | AG     | T      | ATA   | A   | TG   | C   | TAG  | TT   | TAT   | T   | G   | TTT | CT  | TAG | G   | CTA | TTTT | TG | T   | ACT | TG  | T   | ACT  | TT | GG | C  | CT | CTTT | TG  | T  |    |     |     |     |    |     |    |    |    |   |
|                        |         |        |            |       |         |       |         |        |        |         |         |        |        |         |       |        | Section 986 |        |        |        |       |     |      |     |      |      |       |     |     |     |     |     |     |     |      |    |     |     |     |     |      |    |    |    |    |      |     |    |    |     |     |     |    |     |    |    |    |   |
|                        | (94561) | 94561  | 94567      |       | 94578   |       | 94589   |        | 94600  |         | 94611   |        | 94622  |         | 94633 |        | 94644       |        | 94656  |        |       |     |      |     |      |      |       |     |     |     |     |     |     |     |      |    |     |     |     |     |      |    |    |    |    |      |     |    |    |     |     |     |    |     |    |    |    |   |
| T4 NC 000866.4         | (94279) | ATA    | ATA        | AA    | CC      | AG    | AC      | CAC    | AA     | T       | T       | AG     | T      | AGG     | TC    | G      | TG          | T      | G      | T      | CGG   | CC  | AG   | A   | T    | CC   | GA    | A   | T   | TG  | T   | TA  | A   | AC  | AGG  | G  | TG  | C   | T   | T   | A    | T  | A  | T  | CG | TT   | GGG | -T | GA | A   | G   | ACT | AT |     |    |    |    |   |
| SARS-CoV-2 NC_045512.2 | (11660) | T      | T          | ACT   | CA      | CC    | G--     | CT     | AG     | TT      | T       | AG     | AC     | TG      | AC    | TC     | T           | TG     | T      | G      | T     | TT  | AT   | G   | ATT  | A    | CT    | T   | AG  | T   | TC  | T   | AC  | AC  | AGG  | AG | TT  | T   | AG  | AT  | ATA  | T  | G  | AA | TT | C    | AC  | AG | GG | ACT | ACT | CC  |    |     |    |    |    |   |
|                        |         |        |            |       |         |       |         |        |        |         |         |        |        |         |       |        | Section 987 |        |        |        |       |     |      |     |      |      |       |     |     |     |     |     |     |     |      |    |     |     |     |     |      |    |    |    |    |      |     |    |    |     |     |     |    |     |    |    |    |   |
|                        | (94657) | 94657  |            | 94666 |         | 94677 |         | 94688  |        | 94699   |         | 94710  |        | 94721   |       | 94732  |             | 94752  |        |        |       |     |      |     |      |      |       |     |     |     |     |     |     |     |      |    |     |     |     |     |      |    |    |    |    |      |     |    |    |     |     |     |    |     |    |    |    |   |
| T4 NC 000866.4         | (94374) | G      | CA         | A     | CA      | G     | C       | T      | T      | TAG     | C       | A      | CG     | CC      | A     | CCA    | AG          | G      | T      | A      | TG    | ATG | C    | T   | C    | CGG  | G     | CGG | TGT | TAC | --  | A   | AT  | T   | G    | AT | G   | G   | -G  | C   | AG   | C  | G  | C  |    |      |     |    |    |     |     |     |    |     |    |    |    |   |
| SARS-CoV-2 NC_045512.2 | (11754) | C      | AC         | CA    | AG      | AA    | TAG     | C      | AT     | A       | G       | --     | AT     | G       | --    | C      | CT          | T      | CA     | AA     | C     | -T  | CA   | CA  | AT   | T    | AA    | AT  | T   | G   | T   | T   | G   | G   | TG   | T  | G   | T   | G   | T   | G    | G  | CA | AA | C  | CT   | TGT | AT | CA | AA  | AG  | TAG | CC | ACT | GT | AC | AG | T |

## SARS-CoV-2 & T4.apr

|                        |         |       |       |       |       |       |       |       |       |       |       |       |       |       |       |       |       |             |
|------------------------|---------|-------|-------|-------|-------|-------|-------|-------|-------|-------|-------|-------|-------|-------|-------|-------|-------|-------------|
|                        |         |       |       |       |       |       |       |       |       |       |       |       |       |       |       |       |       | Section 988 |
|                        | (94753) | 94753 |       | 94765 |       | 94776 |       | 94787 |       | 94798 |       | 94809 |       | 94820 |       | 94831 |       | 94848       |
| T4 NC_000866.4         | (94467) | T     | TAA   | T     | A     | G     | A     | G     | A     | A     | G     | C     | C     | A     | G     | A     | T     | T           |
| SARS-CoV-2 NC_045512.2 | (11844) | C     | TAA   | A     | A     | A     | A     | A     | A     | G     | C     | A     | T     | A     | G     | A     | T     | T           |
|                        |         |       |       |       |       |       |       |       |       |       |       |       |       |       |       |       |       | Section 989 |
|                        | (94849) | 94849 |       | 94864 |       | 94875 |       | 94886 |       | 94897 |       | 94908 |       | 94919 |       | 94930 |       | 94944       |
| T4 NC_000866.4         | (94561) | A     | C     | T     | T     | A     | T     | G     | C     | T     | A     | A     | A     | A     | A     | C     | C     | G           |
| SARS-CoV-2 NC_045512.2 | (11933) | C     | A     | A     | T     | G     | T     | C     | T     | A     | A     | A     | A     | A     | A     | C     | C     | G           |
|                        |         |       |       |       |       |       |       |       |       |       |       |       |       |       |       |       |       | Section 990 |
|                        | (94945) | 94945 |       | 94952 |       | 94963 |       | 94974 |       | 94985 |       | 94996 |       | 95007 |       | 95018 |       | 95040       |
| T4 NC_000866.4         | (94654) | -     | A     | A     | T     | A     | A     | A     | A     | A     | A     | A     | A     | A     | A     | A     | A     | A           |
| SARS-CoV-2 NC_045512.2 | (12025) | C     | A     | T     | G     | C     | A     | T     | A     | A     | A     | A     | A     | A     | A     | A     | A     | A           |
|                        |         |       |       |       |       |       |       |       |       |       |       |       |       |       |       |       |       | Section 991 |
|                        | (95041) | 95041 |       | 95051 |       | 95062 |       | 95073 |       | 95084 |       | 95095 |       | 95106 |       | 95117 |       | 95136       |
| T4 NC_000866.4         | (94748) | A     | T     | G     | T     | T     | T     | C     | -     | -     | C     | C     | T     | G     | A     | T     | T     | T           |
| SARS-CoV-2 NC_045512.2 | (12110) | A     | T     | G     | T     | T     | T     | C     | -     | -     | C     | C     | T     | G     | A     | T     | T     | T           |
|                        |         |       |       |       |       |       |       |       |       |       |       |       |       |       |       |       |       | Section 992 |
|                        | (95137) | 95137 |       | 95150 |       | 95161 |       | 95172 |       | 95183 |       | 95194 |       | 95205 |       | 95216 |       | 95232       |
| T4 NC_000866.4         | (94841) | A     | T     | G     | A     | A     | G     | A     | G     | A     | G     | A     | G     | A     | G     | A     | G     | A           |
| SARS-CoV-2 NC_045512.2 | (12203) | T     | T     | G     | A     | A     | A     | G     | A     | G     | A     | G     | A     | G     | A     | G     | A     | A           |
|                        |         |       |       |       |       |       |       |       |       |       |       |       |       |       |       |       |       | Section 993 |
|                        | (95233) | 95233 | 95238 |       | 95249 |       | 95260 |       | 95271 |       | 95282 |       | 95293 |       | 95304 |       | 95315 | 95328       |
| T4 NC_000866.4         | (94933) | G     | T     | T     | A     | G     | G     | A     | A     | A     | A     | A     | A     | A     | A     | A     | A     | A           |
| SARS-CoV-2 NC_045512.2 | (12274) | G     | A     | T     | G     | G     | T     | G     | A     | T     | C     | A     | A     | A     | A     | A     | A     | A           |
|                        |         |       |       |       |       |       |       |       |       |       |       |       |       |       |       |       |       | Section 994 |
|                        | (95329) | 95329 |       | 95337 |       | 95348 |       | 95359 |       | 95370 |       | 95381 |       | 95392 |       | 95403 |       | 95424       |
| T4 NC_000866.4         | (95078) | T     | T     | A     | T     | C     | A     | A     | T     | T     | A     | T     | T     | A     | T     | T     | A     | T           |
| SARS-CoV-2 NC_045512.2 | (12366) | T     | C     | A     | T     | A     | T     | C     | A     | A     | T     | T     | A     | T     | T     | A     | T     | T           |

## SARS-CoV-2 &amp; T4.apr

|                        |         |              |       |        |         |         |        |        |         |         |        |
|------------------------|---------|--------------|-------|--------|---------|---------|--------|--------|---------|---------|--------|
|                        |         | Section 995  |       |        |         |         |        |        |         |         |        |
|                        |         | (95425)      | 95425 | 95436  | 95447   | 95458   | 95469  | 95480  | 95491   | 95502   | 95520  |
| T4 NC_000866.4         | (95120) | AAGGA        | ATTAA | CATTCC | GAATT   | TAG---- | TGAATT | AGAATT | AAATG   | CTGTTC  | GC     |
| SARS-CoV-2 NC_045512.2 | (12455) | CTTAC        | AACAG | CAGC   | CAACTAA | TGGTT   | GTCATA | CCAGAC | TATAA   | CAATATA | AAATAC |
|                        |         | Section 996  |       |        |         |         |        |        |         |         |        |
|                        |         | (95521)      | 95521 | 95535  | 95546   | 95557   | 95568  | 95579  | 95590   | 95601   | 95616  |
| T4 NC_000866.4         | (95211) | TGAA         | GATG  | ATCA   | AAATTA  | TTCT    | GAGCT  | AAAGAA | T--AC-- | GTTGAA  | ---    |
| SARS-CoV-2 NC_045512.2 | (12549) | TGTG         | GGAAT | GC     | CAAGG   | TTGT    | AGATG  | CAAGAT | AGTAA   | ATTGTT  | CAA    |
|                        |         | Section 997  |       |        |         |         |        |        |         |         |        |
|                        |         | (95617)      | 95617 | 95623  | 95634   | 95645   | 95656  | 95667  | 95678   | 95689   | 95712  |
| T4 NC_000866.4         | (95292) | ATCT         | AGCC  | CAATTT | GACATG  | ATTC    | ATGGAT | TAA    | TAAAT   | ATTAT   | ATAA   |
| SARS-CoV-2 NC_045512.2 | (12645) | TGT          | TAAC  | AGC    | TTTAA   | GGGCC   | AAATTC | TGCTG  | TCAA    | ATTACA  | GAATA  |
|                        |         | Section 998  |       |        |         |         |        |        |         |         |        |
|                        |         | (95713)      | 95713 | 95722  | 95733   | 95744   | 95755  | 95766  | 95777   | 95788   | 95808  |
| T4 NC_000866.4         | (95385) | AATTC        | GTCT  | TTTAG  | ACGAT   | ATGCTA  | CCTTG  | ATGG   | CGATT   | TGTTT   | CA     |
| SARS-CoV-2 NC_045512.2 | (12740) | ACAC         | AAA   | CTG    | CTTG    | CACTG   | ATGACA | -----  | ATGCG   | TTAGC   | TAC    |
|                        |         | Section 999  |       |        |         |         |        |        |         |         |        |
|                        |         | (95809)      | 95809 | 95821  | 95832   | 95843   | 95854  | 95865  | 95876   | 95887   | 95904  |
| T4 NC_000866.4         | (95480) | TGTT         | CTAT  | TACG   | TATG    | --CAT   | CAAAG  | GAACA  | CTTTA   | ---TG   | ATG    |
| SARS-CoV-2 NC_045512.2 | (12825) | ATTT         | ACAG  | GA---  | TTTG    | AAATG   | GGCTA  | GATTC  | CTAAG   | AGTG    | ATG    |
|                        |         | Section 1000 |       |        |         |         |        |        |         |         |        |
|                        |         | (95905)      | 95905 | 95920  | 95931   | 95942   | 95953  | 95964  | 95975   | 95986   | 96000  |
| T4 NC_000866.4         | (95571) | GAAA         | --CT  | ATCT   | ACCTC   | GTA     | TAA--  | ATT    | TACAT   | TTAG    | TTT    |
| SARS-CoV-2 NC_045512.2 | (12915) | CAG          | ACA   | CACC   | TAAAG   | TCCTA   | AGTGA  | AGTAT  | TTTATA  | CTTT    | ATT    |
|                        |         | Section 1001 |       |        |         |         |        |        |         |         |        |
|                        |         | (96001)      | 96001 | 96008  | 96019   | 96030   | 96041  | 96052  | 96063   | 96074   | 96096  |
| T4 NC_000866.4         | (95662) | AAAA         | --AG  | GTG    | CACTT   | CTGTAG  | TATC   | GCA    | GTA     | TAA     | TCC    |
| SARS-CoV-2 NC_045512.2 | (13009) | CAC          | AGT   | ACGT   | CTACA   | AGCTG   | G--TA  | ATG    | CAAC    | AGAG    | TGCCTG |

## SARS-CoV-2 &amp; T4.apr

|                        |         |              |              |             |             |              |                 |               |                    |                   |
|------------------------|---------|--------------|--------------|-------------|-------------|--------------|-----------------|---------------|--------------------|-------------------|
|                        |         |              |              |             |             |              |                 |               |                    | Section 1002      |
|                        | (96097) | 96097        | 96107        | 96118       | 96129       | 96140        | 96151           | 96162         | 96173              | 96192             |
| T4 NC_000866.4         | (95753) | TATGTTTC     | AAATAGTTGAAC | -AGATTC     | TCCATATTTT  | CAACC--TCATT | TAAACACTA       | TGTACGAGCAGTT | TGGAAATGAT         | TATTC             |
| SARS-CoV-2 NC_045512.2 | (13096) | TAAAGCTT     | ACAAAGATTATC | TAGCTAGT    | TGGGGGACAAC | CAATCAC      | TAAATTGTGT      | TAAGATGT      | TGTGTACACAC        | TGGTAC            |
|                        |         |              |              |             |             |              |                 |               |                    | Section 1003      |
|                        | (96193) | 96193        | 96206        | 96217       | 96228       | 96239        | 96250           | 96261         | 96272              | 96288             |
| T4 NC_000866.4         | (95846) | AAGGGATAT--T | AAATTGTACT   | GATGTCTGCT  | TGCTATAGAC  | GAAGCTATAG   | TGTTGGGATAAT    | TTA-TCTCGT    | CGTAGAATTGAATGG    | TCATTAA           |
| SARS-CoV-2 NC_045512.2 | (13191) | CAGTTACACCGG | AAGCCAAATG   | GATCAAGAA   | TCCTTTGGTG  | TGCA         | TCGTGT          | TGTCTGTACT    | TGCCGTG            | CCATAGATCATCCAAA  |
|                        |         |              |              |             |             |              |                 |               |                    | Section 1004      |
|                        | (96289) | 96289        | 96294        | 96305       | 96316       | 96327        | 96338           | 96349         | 96360              | 96371             |
| T4 NC_000866.4         | (95939) | A----        | TTTGAAGTAAAT | TGGATGGAT   | GTATCCTC    | CAGTAGAT     | TGATGCAGAAGGATT | AAATTC        | GTACTACTTATACAG    | --ATTTTAC         |
| SARS-CoV-2 NC_045512.2 | (13287) | GATTTT       | TGFGACT      | FAAAGG      | ---TAAGTAT  | GTACAAATA    | CCATA-----C     | AACTTGTG      | CTAATGACC          | CTGTGGGTTTAC      |
|                        |         |              |              |             |             |              |                 |               |                    | Section 1005      |
|                        | (96385) | 96385        | 96393        | 96404       | 96415       | 96426        | 96437           | 96448         | 96459              | 96480             |
| T4 NC_000866.4         | (96079) | AGATTTGC     | CTGACGGCGAA  | GGTGT       | TTTGAATCTGT | CGATAGC      | GAAGTTGT        | TCCTC         | GAGATATTGACCC      | ---AGAAGAC        |
| SARS-CoV-2 NC_045512.2 | (13365) | ACA-CAGT     | CTGTACCGTCT  | CGGTAT      | GTGGAAGGT   | TATGGCT      | GTAGTTGT        | G-ATCA        | ACTCCGC            | GAACCCATGCTTC     |
|                        |         |              |              |             |             |              |                 |               |                    | Section 1006      |
|                        | (96481) | 96481        | 96492        | 96503       | 96514       | 96525        | 96536           | 96547         | 96558              | 96576             |
| T4 NC_000866.4         | (96122) | ACAAAC       | TTTCAC       | TAGTAAATGTA | ATA-GAC     | CAACACCG     | CAGAACCTCCT     | GGCC          | CAAGAACATAGAGGTTAT | TATGGAAGGTCTTGATA |
| SARS-CoV-2 NC_045512.2 | (13457) | TCGTTT       | TTAAACGG     | GTGTGCGGTG  | TAGTGCAG    | GCCTTAC      | ACCGTG          | CCGCA         | CAGGCAC            | T-AGT---AC        |
|                        |         |              |              |             |             |              |                 |               |                    | Section 1007      |
|                        | (96577) | 96577        | 96591        | 96602       | 96613       | 96624        | 96635           | 96646         | 96657              | 96672             |
| T4 NC_000866.4         | (96217) | ACTTTT       | AGATATTT     | CTGACCTCCCC | GGAATGACGG  | GGAGGAAA     | TCAAAGTG        | TATGAAC       | CTCTGCAAT          | TAGTAGAAG         |
| SARS-CoV-2 NC_045512.2 | (13539) | GGCTTT       | TGACATCT     | TACAA       | TGATAAAG    | TAGCT        | -----GG         | TTTTTGC       | TAAATCC            | TAAAAC            |
|                        |         |              |              |             |             |              |                 |               |                    | Section 1008      |
|                        | (96673) | 96673        | 96679        | 96690       | 96701       | 96712        | 96723           | 96734         | 96745              | 96756             |
| T4 NC_000866.4         | (96312) | ACCGTAC      | TCCAGAC      | TTAGAA      | GATGATTA    | TGGA         | GTAGTTCGTC      | GAAATATGCA    | TTTTCAG            | CAACAA            |
| SARS-CoV-2 NC_045512.2 | (13624) | G-----A      | TGACAA       | TATAATT     | GATTC       | TTA          | CTTTGTAGTT      | AAGA          | GACAC              | CTT-TCTCTAAC      |
|                        |         |              |              |             |             |              |                 |               |                    | Section 1009      |
|                        | (96756) | 96756        | 96768        |             |             |              |                 |               |                    |                   |
| T4 NC_000866.4         | (96312) | ACCGTAC      | TCCAGAC      | TTAGAA      | GATGATTA    | TGGA         | GTAGTTCGTC      | GAAATATGCA    | TTTTCAG            | CAACAA            |
| SARS-CoV-2 NC_045512.2 | (13624) | G-----A      | TGACAA       | TATAATT     | GATTC       | TTA          | CTTTGTAGTT      | AAGA          | GACAC              | CTT-TCTCTAAC      |



## SARS-CoV-2 &amp; T4.apr

|                        |         |                                                                                                                                                                                                 |             |       |       |       |       |       |       |       |             |
|------------------------|---------|-------------------------------------------------------------------------------------------------------------------------------------------------------------------------------------------------|-------------|-------|-------|-------|-------|-------|-------|-------|-------------|
|                        |         | Section 1009                                                                                                                                                                                    |             |       |       |       |       |       |       |       |             |
|                        |         | (96769)                                                                                                                                                                                         | 96769       | 96778 | 96789 | 96800 | 96811 | 96822 | 96833 | 96844 | 96864       |
| T4 NC_000866.4         | (96408) | A G A C A G C A A A G A A T G C T G A T T C T C C T C G T C A C A -- T G G A A G T A T T T G C A A C T C T T A T G G G C C A A T G A C T A C G A C G A A C A G A G A A A T A C T G A A G C T    |             |       |       |       |       |       |       |       |             |
| SARS-CoV-2 NC_045512.2 | (13714) | - G A T T G T C C A G --- C T G T T G C T A A A C A T G A C T T C T T T A A G T T T A G A A T A G A C --- G G T G A C A T G - G T A C C A C - - A T A T A T C A C G T C A A C G T C T           |             |       |       |       |       |       |       |       |             |
|                        |         | Section 1010                                                                                                                                                                                    |             |       |       |       |       |       |       |       |             |
|                        |         | (96865)                                                                                                                                                                                         | 96865       | 96877 | 96888 | 96899 | 96910 | 96921 | 96932 | 96943 | 96960       |
| T4 NC_000866.4         | (96507) | T C A T A A A G A T A T G A A A G - A C A T T A C A T C T G A G C A G G T T G G C A C C A A A G G C G C T G T T C C T A C A G G T C A A A T G A A T A T T C A G A A T G C G A C A G - T A T T C |             |       |       |       |       |       |       |       |             |
| SARS-CoV-2 NC_045512.2 | (13797) | T A C T A A A T A C A C A A T G G C A G A C C T C G T C T A T G C T T T A A G G C A T T T T G A T G A A G G T A A T T G T G A C A C A T T A A A G A A A T A C T T G T C A C A T A C A A T T G   |             |       |       |       |       |       |       |       |             |
|                        |         | Section 1011                                                                                                                                                                                    |             |       |       |       |       |       |       |       |             |
|                        |         | (96961)                                                                                                                                                                                         | 96961       | 96976 | 96987 | 96998 | 97009 | 97020 | 97031 | 97042 | 97056       |
| T4 NC_000866.4         | (96596) | A T G G G T T C A C C A A C A G A A T T A A T G G A C G A A A T T G G T G A T G C T T A C G A G G C T C A A G A A G C T C G T G A G A A G G T G A T A A A T G A A C A A C C G A T T A A T G T   |             |       |       |       |       |       |       |       |             |
| SARS-CoV-2 NC_045512.2 | (13893) | T T G T G A T G A T G A T T A T T - T C A A T A A A A A G G A C T G G - - - - - T A T G A T T T T G T A G A A A A C C A G A T A T A T T - A - - - - - C G C G T A T A C G C C A C T T A         |             |       |       |       |       |       |       |       |             |
|                        |         | Section 1012                                                                                                                                                                                    |             |       |       |       |       |       |       |       |             |
|                        |         | (97057)                                                                                                                                                                                         | 97057       | 97064 | 97075 | 97086 | 97097 | 97108 | 97119 | 97130 | 97141 97152 |
| T4 NC_000866.4         | (96697) | A T T A A A T G A T T T C - - C A T C C G T T A A A T G A A G C T G G A A A A A T T T T A A T A A A A C A C C C A A G C T T A G C G G A A A G A A A A G A - T G A A G A T G G A A T T - C A T T |             |       |       |       |       |       |       |       |             |
| SARS-CoV-2 NC_045512.2 | (13975) | G G T G A A C G T G T A C G C C A A G C T T T - - - - - G T T A A A A A C A G T A C A A T T - - - C T G T G A T G C C A T G C G A A A T G C T G G T A T G T T G G T G T A C T G A C A T T       |             |       |       |       |       |       |       |       |             |
|                        |         | Section 1013                                                                                                                                                                                    |             |       |       |       |       |       |       |       |             |
|                        |         | (97153)                                                                                                                                                                                         | 97153       | 97163 | 97174 | 97185 | 97196 | 97207 | 97218 | 97229 | 97248       |
| T4 NC_000866.4         | (96784) | G G A T A A A A T C T C A G T G - G G A T G G A A A A T G G T A T C C T G A A A A A T T C A G T G A T T A C C T T C G T - C T A C A C A A A A T A G T A A A A A T T C C A A C A A - - C T C T   |             |       |       |       |       |       |       |       |             |
| SARS-CoV-2 NC_045512.2 | (14061) | A G A T A A - - T C A A G A T C T C A A T G G T A A C T G G T A T G A T - - - - - T T C G G T G A T T C A T A C A A A C A C G C C A G G T A G T G G A G T T C C T G T T G T A G A T T C T       |             |       |       |       |       |       |       |       |             |
|                        |         | Section 1014                                                                                                                                                                                    |             |       |       |       |       |       |       |       |             |
|                        |         | (97249)                                                                                                                                                                                         | 97249       | 97262 | 97273 | 97284 | 97295 | 97306 | 97317 | 97328 | 97344       |
| T4 NC_000866.4         | (96876) | G A T A A G C C T G A A T T A T T T C A A A C T T A T A A A G A T A A G A A T A A T A A A A G A T C T C G G T A T A T G G G T C T - - T C C T A A C T T G A A A C G A G C T A A T A T T A A A A |             |       |       |       |       |       |       |       |             |
| SARS-CoV-2 NC_045512.2 | (14149) | T A T T A T T C A T T G T T A A T G C C T A - - T A T T A A C C T - - - - - T G A C C A G G G C T T T A A C T G C A - G A G T C A C A T G T T G A C A C T G A C T T A A C A A A G C C T T A C A |             |       |       |       |       |       |       |       |             |
|                        |         | Section 1015                                                                                                                                                                                    |             |       |       |       |       |       |       |       |             |
|                        |         | (97345)                                                                                                                                                                                         | 97345 97350 | 97361 | 97372 | 97383 | 97394 | 97405 | 97416 | 97427 | 97440       |
| T4 NC_000866.4         | (96970) | C A C A A T G G - A C T C G T G A A A T G G T T G A G G A A T G G A A A A A T G C C G A G A T G A T A T T G T - - T T A T T T T T G C A G A A A C A T A C T G T G C C A T T A - - - C T C A T A |             |       |       |       |       |       |       |       |             |
| SARS-CoV-2 NC_045512.2 | (14237) | T T A A G T G G G A T T T G T T A A A A T A T G A C T T C A C G G A A G A G A G G T T A A A A C T C T T T G A C C G T T A T T T T T - - - - - A A A T A T G G G A T C A G A C A T A C C A C C   |             |       |       |       |       |       |       |       |             |

## SARS-CoV-2 & T4.apr

[illegible]

## SARS-CoV-2 &amp; T4.apr

|                        |         |       |        |           |          |       |       |       |       |       |         |              |       |       |       |      |        |       |        |         |       |            |       |         |     |       |      |      |      |       |       |       |      |        |      |       |       |       |       |      |     |     |   |      |      |   |     |   |   |   |    |   |   |   |   |   |   |   |   |   |
|------------------------|---------|-------|--------|-----------|----------|-------|-------|-------|-------|-------|---------|--------------|-------|-------|-------|------|--------|-------|--------|---------|-------|------------|-------|---------|-----|-------|------|------|------|-------|-------|-------|------|--------|------|-------|-------|-------|-------|------|-----|-----|---|------|------|---|-----|---|---|---|----|---|---|---|---|---|---|---|---|---|
|                        |         |       |        |           |          |       |       |       |       |       |         | Section 1023 |       |       |       |      |        |       |        |         |       |            |       |         |     |       |      |      |      |       |       |       |      |        |      |       |       |       |       |      |     |     |   |      |      |   |     |   |   |   |    |   |   |   |   |   |   |   |   |   |
|                        | (98113) | 98113 | 98120  | 98131     | 98142    | 98153 | 98164 | 98175 | 98186 | 98197 | 98208   |              |       |       |       |      |        |       |        |         |       |            |       |         |     |       |      |      |      |       |       |       |      |        |      |       |       |       |       |      |     |     |   |      |      |   |     |   |   |   |    |   |   |   |   |   |   |   |   |   |
| T4 NC_000866.4         | (97723) | AACAT | TACTGC | AGCGTTTGA | AGGGACTT | CTGGT | ACAT  | TAA   | ATTT  | CAGG  | AATGAAA | T            | AGCT  | GT    | TATG  | GAT  | TTTATT | GAAG  | T      | AAAC    | ACC   | AGAT       | GAT   | CAT     | G   |       |      |      |      |       |       |       |      |        |      |       |       |       |       |      |     |     |   |      |      |   |     |   |   |   |    |   |   |   |   |   |   |   |   |   |
| SARS-CoV-2 NC_045512.2 | (14929) | AACCT | T----- | AGACAAATC | AG-----  | CTGGT | -TT   | TCC   | ATTTA | ATA   | AATG    | GGG          | T     | AAG   | --    | GCTA | --     | GAC   | TTTATT | ATGA    | T     | TCA        | ATG   | AG      | -TT | AT    | G    | AGG  |      |       |       |       |      |        |      |       |       |       |       |      |     |     |   |      |      |   |     |   |   |   |    |   |   |   |   |   |   |   |   |   |
|                        |         |       |        |           |          |       |       |       |       |       |         | Section 1024 |       |       |       |      |        |       |        |         |       |            |       |         |     |       |      |      |      |       |       |       |      |        |      |       |       |       |       |      |     |     |   |      |      |   |     |   |   |   |    |   |   |   |   |   |   |   |   |   |
|                        | (98209) | 98209 | 98219  | 98230     | 98241    | 98252 | 98263 | 98274 | 98285 | 98304 |         |              |       |       |       |      |        |       |        |         |       |            |       |         |     |       |      |      |      |       |       |       |      |        |      |       |       |       |       |      |     |     |   |      |      |   |     |   |   |   |    |   |   |   |   |   |   |   |   |   |
| T4 NC_000866.4         | (97819) | GTTTT | AC     | CAATTT    | TAA      | AAAA  | CT    | GAAC  | CAG   | ATA   | G       | AAAA         | TAT   | TG    | CAACT | CTAG | AT     | TG    | CT     | CAG     | A     | AGGTCGTGGG | CAA   | GATT    | ACC | CACGC | TTT  | G    | CAT  | A     |       |       |      |        |      |       |       |       |       |      |     |     |   |      |      |   |     |   |   |   |    |   |   |   |   |   |   |   |   |   |
| SARS-CoV-2 NC_045512.2 | (15008) | ----- | AT     | CAA       | GAT      | TGCA  | A---  | CT    | TTTCG | CAT   | ATA     | C            | AAAA  | CG    | TA    | ATG  | T----- | C     | AT     | CC      | CT    | ACT        | A     | TA----- | ACT | CAA   | ATGA | AT   | C--- | T     | TAA   | G     | TAT  | G      |      |       |       |       |       |      |     |     |   |      |      |   |     |   |   |   |    |   |   |   |   |   |   |   |   |   |
|                        |         |       |        |           |          |       |       |       |       |       |         | Section 1025 |       |       |       |      |        |       |        |         |       |            |       |         |     |       |      |      |      |       |       |       |      |        |      |       |       |       |       |      |     |     |   |      |      |   |     |   |   |   |    |   |   |   |   |   |   |   |   |   |
|                        | (98305) | 98305 | 98318  | 98329     | 98340    | 98351 | 98362 | 98373 | 98384 | 98400 |         |              |       |       |       |      |        |       |        |         |       |            |       |         |     |       |      |      |      |       |       |       |      |        |      |       |       |       |       |      |     |     |   |      |      |   |     |   |   |   |    |   |   |   |   |   |   |   |   |   |
| T4 NC_000866.4         | (97915) | TT    | ATT    | GAT       | TG       | TT    | ACT   | GAT   | GAT   | G     | TGT     | G            | GGAAC | AG    | GT    | TGGT | G      | T     | T      | TGCAT   | T     | CAA        | AC    | ACT     | AT  | TT    | CTC  | AT   | TT   | AATTC | T     | AC    | CT   | TGACAT | CGTT | A     | TGCG  | TT    | ATT   | T    |     |     |   |      |      |   |     |   |   |   |    |   |   |   |   |   |   |   |   |   |
| SARS-CoV-2 NC_045512.2 | (15080) | CC    | ATT    | AG        | TG       | CA    | A     | AGA   | AT    | AGA   | G       | CTC          | G     | CACCG | TAG   | C    | TGGT   | G     | T      | C       | TATC  | T          | G     | T       | AGT | ACT   | AT   | GAC  | CA   | AT    | AG    | AC    | AGT  | TT     | CAT  | ----- | C     | AAAAA | TT    | ATT  | T   |     |   |      |      |   |     |   |   |   |    |   |   |   |   |   |   |   |   |   |
|                        |         |       |        |           |          |       |       |       |       |       |         | Section 1026 |       |       |       |      |        |       |        |         |       |            |       |         |     |       |      |      |      |       |       |       |      |        |      |       |       |       |       |      |     |     |   |      |      |   |     |   |   |   |    |   |   |   |   |   |   |   |   |   |
|                        | (98401) | 98401 | 98406  | 98417     | 98428    | 98439 | 98450 | 98461 | 98472 | 98483 | 98496   |              |       |       |       |      |        |       |        |         |       |            |       |         |     |       |      |      |      |       |       |       |      |        |      |       |       |       |       |      |     |     |   |      |      |   |     |   |   |   |    |   |   |   |   |   |   |   |   |   |
| T4 NC_000866.4         | (98011) | TAGTA | GAA    | TA        | CAAT     | GAAT  | GCC   | CAG   | TTT   | AT    | ATT     | GA           | AT    | TA    | AA    | TAG  | GTA    | CTGGT | G      | T       | G     | AGT        | T     | G       | CA  | AA    | AT   | C    | GCT  | TT    | A     | TATGG | AT   | -TT    | AGA  | AT    | ACG   | A     | AGG   | T    |     |     |   |      |      |   |     |   |   |   |    |   |   |   |   |   |   |   |   |   |
| SARS-CoV-2 NC_045512.2 | (15168) | ----- | GAA    | AT        | CAAT     | AGCC  | GCC   | -     | ACT   | --    | AG      | A            | -     | G     | AG    | -    | G      | A     | G      | C       | T     | A          | G     | T       | A   | A     | T    | T    | G    | A     | A     | C     | AAG  | CAAA   | TTT  | C     | TATGG | TGG   | TT    | G    | C   | A   | A | C    | A    | T | G   | T |   |   |    |   |   |   |   |   |   |   |   |   |
|                        |         |       |        |           |          |       |       |       |       |       |         | Section 1027 |       |       |       |      |        |       |        |         |       |            |       |         |     |       |      |      |      |       |       |       |      |        |      |       |       |       |       |      |     |     |   |      |      |   |     |   |   |   |    |   |   |   |   |   |   |   |   |   |
|                        | (98497) | 98497 | 98505  | 98516     | 98527    | 98538 | 98549 | 98560 | 98571 | 98592 |         |              |       |       |       |      |        |       |        |         |       |            |       |         |     |       |      |      |      |       |       |       |      |        |      |       |       |       |       |      |     |     |   |      |      |   |     |   |   |   |    |   |   |   |   |   |   |   |   |   |
| T4 NC_000866.4         | (98106) | GTT   | AT     | CTG       | CGATT    | CA    | TATA  | C     | TGAT  | TT    | TAG     | GA           | A     | TGAAA | CAAA  | CT   | AA     | AC    | G      | CACGAA  | AGCAG | T          | AGGAT | GT      | TCC | ACGC  | T    | AAA  | AG   | ACCT  | TAT   | TG    | AAA  | AA     | GAT  |       |       |       |       |      |     |     |   |      |      |   |     |   |   |   |    |   |   |   |   |   |   |   |   |   |
| SARS-CoV-2 NC_045512.2 | (15246) | AAA   | AA     | CTG       | TT-----  | TATA  | G     | TGAT  | G     | TAG   | AA      | ACCCT        | C     | -     | AC    | CT   | A      | TG    | G      | GT----- | T     | G          | GAT   | TA      | TCC | TAAAT | TGTG | AT   | AGAG | CCA   | TG    | CCT   | AA   | CAT    |      |       |       |       |       |      |     |     |   |      |      |   |     |   |   |   |    |   |   |   |   |   |   |   |   |   |
|                        |         |       |        |           |          |       |       |       |       |       |         | Section 1028 |       |       |       |      |        |       |        |         |       |            |       |         |     |       |      |      |      |       |       |       |      |        |      |       |       |       |       |      |     |     |   |      |      |   |     |   |   |   |    |   |   |   |   |   |   |   |   |   |
|                        | (98593) | 98593 | 98604  | 98615     | 98626    | 98637 | 98648 | 98659 | 98670 | 98688 |         |              |       |       |       |      |        |       |        |         |       |            |       |         |     |       |      |      |      |       |       |       |      |        |      |       |       |       |       |      |     |     |   |      |      |   |     |   |   |   |    |   |   |   |   |   |   |   |   |   |
| T4 NC_000866.4         | (98202) | AA    | GCTTA  | TT        | ATT      | CAT   | -     | CAC   | C     | GAGC  | G       | ACTA         | TT    | C     | AAG   | --   | AA     | TT    | TAG    | AACGT   | TT    | AGT        | G     | AAA     | A   | AG    | GC   | G    | TGTC | TT    | GGG   | CG    | G    | CT     | G    | AAGA  | AG    | G     | TTA   | T    | CAT | GAC |   |      |      |   |     |   |   |   |    |   |   |   |   |   |   |   |   |   |
| SARS-CoV-2 NC_045512.2 | (15327) | --    | GCTTA  | GA        | ATT      | ATGG  | C     | CT    | C     | ACTT  | G       | TTCT         | T     | G     | C     | T    | C      | GA    | AA     | CA      | T     | A          | C     | AACGT   | G   | T     | GT   | ---- | A    | --    | G     | CT    | TGTC | --     | AC   | AC    | CG    | TT    | T     | CTAT | AG  | TTA | G | C    | TAAT | G |     |   |   |   |    |   |   |   |   |   |   |   |   |   |
|                        |         |       |        |           |          |       |       |       |       |       |         | Section 1029 |       |       |       |      |        |       |        |         |       |            |       |         |     |       |      |      |      |       |       |       |      |        |      |       |       |       |       |      |     |     |   |      |      |   |     |   |   |   |    |   |   |   |   |   |   |   |   |   |
|                        | (98689) | 98689 | 98703  | 98714     | 98725    | 98736 | 98747 | 98758 | 98769 | 98784 |         |              |       |       |       |      |        |       |        |         |       |            |       |         |     |       |      |      |      |       |       |       |      |        |      |       |       |       |       |      |     |     |   |      |      |   |     |   |   |   |    |   |   |   |   |   |   |   |   |   |
| T4 NC_000866.4         | (98295) | GAT   | TT     | TAG       | T        | AAT   | GT    | CTT   | AGT   | G     | A       | TTT          | T     | TG    | G     | ATG  | G      | T     | TAT    | C       | AACG  | C          | AGT   | C       | AAA | AA    | TT   | T    | ATT  | G     | ATTAT | G     | CGGA | T      | AA   | AGAT  | G     | A     | CAT   | G    | C   | ATT | A | GCAT | C    | T | --- |   |   |   |    |   |   |   |   |   |   |   |   |   |
| SARS-CoV-2 NC_045512.2 | (15413) | AG    | T      | G         | T        | G     | C     | T     | CA    | AGT   | TTT     | AGT          | G     | AA    | T     | TG   | G      | T     | C      | AT      | G     | T          | G     | G       | G   | T     | C    | A    | T    | A     | T     | G     | TTA  | AA     | ACC  | AGG   | TG    | G     | AACCT | C    | A   | T   | C | AG   | G    | A | T   | G | C | A | CA | A | C | T | G | C | T | A | T | G |

## SARS-CoV-2 &amp; T4.apr

|                        |         |        |       |         |           |          |                  |           |       |        |              |        |         |         |        |          |       |         |       |        |        |         |     |       |            |          |         |       |        |       |       |      |     |       |     |     |     |     |      |    |    |
|------------------------|---------|--------|-------|---------|-----------|----------|------------------|-----------|-------|--------|--------------|--------|---------|---------|--------|----------|-------|---------|-------|--------|--------|---------|-----|-------|------------|----------|---------|-------|--------|-------|-------|------|-----|-------|-----|-----|-----|-----|------|----|----|
|                        |         |        |       |         |           |          |                  |           |       |        | Section 1030 |        |         |         |        |          |       |         |       |        |        |         |     |       |            |          |         |       |        |       |       |      |     |       |     |     |     |     |      |    |    |
|                        | (98785) | 98785  | 98791 | 98802   | 98813     | 98824    | 98835            | 98846     | 98857 | 98868  | 98880        |        |         |         |        |          |       |         |       |        |        |         |     |       |            |          |         |       |        |       |       |      |     |       |     |     |     |     |      |    |    |
| T4 NC_000866.4         | (98388) | G---   | AGTAT | TTTTCAA | AAGAGCTTC | AGGATATG | AGCGACGACTACGCGC | CAGTTATAT | TGTG  | GATT   | -CGGTTCA     | TTCTGC | --TG    | AGTATGT | TC     | -C       |       |         |       |        |        |         |     |       |            |          |         |       |        |       |       |      |     |       |     |     |     |     |      |    |    |
| SARS-CoV-2 NC_045512.2 | (15509) | CTAAT  | AGTG  | TTTTTAA | CA        | ATTTG    | TCAAGCTG         | -TCA      | CGGC  | CA     | TGTTAATG     | CAC    | TTTATCT | ACT     | GAT    | GGTAACAA | AA    | ATTGC   | C     | GA     | TA     | AGTATGT | CC  | GC    |            |          |         |       |        |       |       |      |     |       |     |     |     |     |      |    |    |
|                        |         |        |       |         |           |          |                  |           |       |        | Section 1031 |        |         |         |        |          |       |         |       |        |        |         |     |       |            |          |         |       |        |       |       |      |     |       |     |     |     |     |      |    |    |
|                        | (98881) | 98881  | 98890 | 98901   | 98912     | 98923    | 98934            | 98945     | 98956 | 98976  |              |        |         |         |        |          |       |         |       |        |        |         |     |       |            |          |         |       |        |       |       |      |     |       |     |     |     |     |      |    |    |
| T4 NC_000866.4         | (98477) | AGT--- | ATCT  | CATGGT  | TATGTCA   | ATGGTATA | AATATAT          | TAAAG     | CATAT | T      | TAAAG        | GA     | -TT     | AAA     | AATGAC | TTT      | AT--- | TATCT   | CC    | GGC    | ATTGAG | C       |     |       |            |          |         |       |        |       |       |      |     |       |     |     |     |     |      |    |    |
| SARS-CoV-2 NC_045512.2 | (15604) | AAT    | TTAC  | AACA    | CA        | GAC      | TT               | TATG      | AGTG  | TCTCT  | A            | TAGAA  | A       | TAG     | AGATGT | T        | GACAC | CAG     | ACT   | TT     | GTG    | AATGAG  | TTT | TACGA | TAT        | TT       | TG      | CG    | TAA    | A     | CATTT | C    |     |       |     |     |     |     |      |    |    |
|                        |         |        |       |         |           |          |                  |           |       |        | Section 1032 |        |         |         |        |          |       |         |       |        |        |         |     |       |            |          |         |       |        |       |       |      |     |       |     |     |     |     |      |    |    |
|                        | (98977) | 98977  | 98989 | 99000   | 99011     | 99022    | 99033            | 99044     | 99055 | 99072  |              |        |         |         |        |          |       |         |       |        |        |         |     |       |            |          |         |       |        |       |       |      |     |       |     |     |     |     |      |    |    |
| T4 NC_000866.4         | (98564) | TCAA   | AGA   | AAC     | TAC       | GGT      | TCAA             | AG        | CAC   | C----- | GT           | AG     | TT      | -AATA   | --     | ACT      | ----- | CT      | ACT   | GGT    | AC     | AG      | CA  | GCT   | TT         | TGGCCGGT | AA      | ATT   | CC     | AGT   | GG    | GGT  |     |       |     |     |     |     |      |    |    |
| SARS-CoV-2 NC_045512.2 | (15700) | TCAA   | T     | GATGA   | TAC       | TCT      | TCTGA            | CG        | ATG   | C      | TGTTGT       | GT     | GT      | TT      | CAATA  | GC       | ACT   | TATGCAT | CT    | CAAGGT | CT     | AG      | TG  | GCT   | TAGCATAAAG | AA       | CTT     | TA    | AGT    | CAG   | TT    |      |     |       |     |     |     |     |      |    |    |
|                        |         |        |       |         |           |          |                  |           |       |        | Section 1033 |        |         |         |        |          |       |         |       |        |        |         |     |       |            |          |         |       |        |       |       |      |     |       |     |     |     |     |      |    |    |
|                        | (99073) | 99073  | 99088 | 99099   | 99110     | 99121    | 99132            | 99143     | 99154 | 99168  |              |        |         |         |        |          |       |         |       |        |        |         |     |       |            |          |         |       |        |       |       |      |     |       |     |     |     |     |      |    |    |
| T4 NC_000866.4         | (98644) | CCT    | GCT   | TTT     | TCA       | GATT     | AAACAGG          | TTA       | CAAA  | TGAAG  | T            | AG     | ATTTA   | GT      | T      | AAT      | ACT   | TTTGG   | T     | CA     | C      | CAACCG  | CT  | G     | AA         | ACTG     | CT      | G     | ACT    | AT    | TTT   | ATG  | TCT | GCG   |     |     |     |     |      |    |    |
| SARS-CoV-2 NC_045512.2 | (15796) | CT     | TTA   | TTA     | TCAA      | AA       | CA               | AA        | TGTTT | TTA    | TGTC         | TGAAG  | CA      | -AA     | --     | A        | TG    | T       | GG    | ACT    | GAGAC  | T       | G   | AC    | T          | --       | TA      | CT    | AA     | AGGAC | CT    | CA   | TG  | AA    | TTT | TGC | TCT | CAA |      |    |    |
|                        |         |        |       |         |           |          |                  |           |       |        | Section 1034 |        |         |         |        |          |       |         |       |        |        |         |     |       |            |          |         |       |        |       |       |      |     |       |     |     |     |     |      |    |    |
|                        | (99169) | 99169  | 99176 | 99187   | 99198     | 99209    | 99220            | 99231     | 99242 | 99253  | 99264        |        |         |         |        |          |       |         |       |        |        |         |     |       |            |          |         |       |        |       |       |      |     |       |     |     |     |     |      |    |    |
| T4 NC_000866.4         | (98740) | -AT    | GAA   | TTT     | CT        | --       | TGC              | AGT       | AC    | GGAA   | ATGA         | CT     | TACG    | AGTA    | GT     | TCGT     | GCTGT | T       | GATAG | AGATA  | C      | CG      | CT  | AAAA  | AC         | -TC      | ATC     | GCC   | AAT    | TG    | CT    | GGTA | AT  | AT    |     |     |     |     |      |    |    |
| SARS-CoV-2 NC_045512.2 | (15886) | CAT    | ACA   | AAT     | GCT       | AG       | T                | TAA       | ACA   | AG     | GGT          | G      | ATGA    | T       | ---    | A        | TGT   | GT      | AC    | CT     | T      | --      | C   | CT    | A          | CC       | AGAT    | C     | CAT    | CA    | AG    | AAT  | C   | TAGGG | GCC | GGC | TG  | T   | TTGT | AG | AT |
|                        |         |        |       |         |           |          |                  |           |       |        | Section 1035 |        |         |         |        |          |       |         |       |        |        |         |     |       |            |          |         |       |        |       |       |      |     |       |     |     |     |     |      |    |    |
|                        | (99265) | 99265  | 99275 | 99286   | 99297     | 99308    | 99319            | 99330     | 99341 | 99360  |              |        |         |         |        |          |       |         |       |        |        |         |     |       |            |          |         |       |        |       |       |      |     |       |     |     |     |     |      |    |    |
| T4 NC_000866.4         | (98832) | T      | GAT   | TAC     | ACA       | ATTTCT   | ACCC             | CAG       | GTA   | GTA    | ACTA         | TGC    | GG      | TTG     | GA     | --       | GAT   | AAAA    | TC    | ACGGT  | C      | -       | AA  | AT    | ATGT       | TT       | CAGATGA | TA    | TTGAAA | CT    | GAA   | GGT  | AA  |       |     |     |     |     |      |    |    |
| SARS-CoV-2 NC_045512.2 | (15976) | -      | GAT   | ATC     | -----     | GTA      | AAAA             | CAG       | ATG   | GTA    | CACT         | TAT    | GAT     | TTG     | AA     | CG       | ST    | TCGTG   | TC    | TTTAG  | CT     | ATAG    | ATG | CT    | T          | ACCCACT  | TA      | ----- | CT     | AA    | AC    | -    | A   |       |     |     |     |     |      |    |    |
|                        |         |        |       |         |           |          |                  |           |       |        | Section 1036 |        |         |         |        |          |       |         |       |        |        |         |     |       |            |          |         |       |        |       |       |      |     |       |     |     |     |     |      |    |    |
|                        | (99361) | 99361  | 99374 | 99385   | 99396     | 99407    | 99418            | 99429     | 99440 | 99456  |              |        |         |         |        |          |       |         |       |        |        |         |     |       |            |          |         |       |        |       |       |      |     |       |     |     |     |     |      |    |    |
| T4 NC_000866.4         | (98925) | AAT    | TAC   | TGA     | AGTAG     | ACGC     | GATG             | GAAA      | -A    | ATT    | AAG          | AAA    | ATT     | AATA    | TT     | CT       | ACTG  | GC      | AAAA  | AT     | -      | TAC     | GCT | TAA   | AGC        | GAA      | AGA     | AGT   | CG     | TGAAT | AT    | CCA  |     |       |     |     |     |     |      |    |    |
| SARS-CoV-2 NC_045512.2 | (16056) | TCC    | TAA   | TC      | AG        | GAGT     | AT               | GCT       | GATG  | TCTTTT | ATT          | TGT    | A       | CTTAC   | AATA   | CATA     | AGAAA | GCT     | TAC   | TGAT   | TGAG   | T       | TAA | CAG   | GAC        | AC       | AT      | GT    | TAG    | AC    | ---   | AT   | GT  | A     |     |     |     |     |      |    |    |

SARS-CoV-2 & T4.apr

|                        |          |            |               |            |                   |               |                 |            |             |             |                     |              |              |                    |          |        |       |       |       |             |       |     |         |      |       |          |        |    |
|------------------------|----------|------------|---------------|------------|-------------------|---------------|-----------------|------------|-------------|-------------|---------------------|--------------|--------------|--------------------|----------|--------|-------|-------|-------|-------------|-------|-----|---------|------|-------|----------|--------|----|
|                        |          |            |               |            |                   |               |                 |            |             |             |                     | Section 1037 |              |                    |          |        |       |       |       |             |       |     |         |      |       |          |        |    |
|                        | (99457)  | 99457      | 99462         | 99473      | 99484             | 99495         | 99506           | 99517      | 99528       | 99539       | 99552               |              |              |                    |          |        |       |       |       |             |       |     |         |      |       |          |        |    |
| T4 NC_000866.4         | (99019)  | ACACTAGG   | TTCTAACT      | GGACTGCG   | GAAATTTCTTCA      | TCTTCCTCTGGTT | AGCTGCAGTAATAAC | TC         | TTGGAAAAATT | TTAC        | TGATTCTGGTA         |              |              |                    |          |        |       |       |       |             |       |     |         |      |       |          |        |    |
| SARS-CoV-2 NC_045512.2 | (16149)  | TTCTGTTA   | TGCTTACT      | AAT----    | GATAACA           | CTTCA         | AGG-----        | -----      | TATTGGGA    | CC          | TGAGTTTATGAGGCTATGT |              |              |                    |          |        |       |       |       |             |       |     |         |      |       |          |        |    |
|                        |          |            |               |            |                   |               |                 |            |             |             |                     | Section 1038 |              |                    |          |        |       |       |       |             |       |     |         |      |       |          |        |    |
|                        | (99553)  | 99553      | 99561         | 99572      | 99583             | 99594         | 99605           | 99616      | 99627       |             | 99648               |              |              |                    |          |        |       |       |       |             |       |     |         |      |       |          |        |    |
| T4 NC_000866.4         | (99113)  | TTTTATTAGC | TGAAT         | TGAAATGCTG | AAGCTGCT          | ATGACAGCGG    | TTGACT          | TTCAAGCAAA | TC          | TAAAAAATAT  | GGAATTTCAGGA        | GTAG         | TAGCGC       |                    |          |        |       |       |       |             |       |     |         |      |       |          |        |    |
| SARS-CoV-2 NC_045512.2 | (16214)  | ACAC       | ACCGCA        | TACAGTCTT  | ACAGGCTGTT        | GGG           | GCTTG--TGTTCT   | TTGCAA     | TTCA        | CAGACT      | TCATTAA             | ATGTG        | GTGC         | TTGCATACGTAG---ACC |          |        |       |       |       |             |       |     |         |      |       |          |        |    |
|                        |          |            |               |            |                   |               |                 |            |             |             |                     | Section 1039 |              |                    |          |        |       |       |       |             |       |     |         |      |       |          |        |    |
|                        | (99649)  | 99649      | 99660         | 99671      | 99682             | 99693         | 99704           | 99715      | 99726       |             | 99744               |              |              |                    |          |        |       |       |       |             |       |     |         |      |       |          |        |    |
| T4 NC_000866.4         | (99209)  | TTTATCCAG  | GCGAATTAG     | GCGAT      | AAAAATTGAAATTGAAA | TCGT          | ATCTAAAGCT      | TGAC       | TATGC       | AAAAGGAG    | CTTCTGCA            | TTACTCC      | CAATTTATCCAG |                    |          |        |       |       |       |             |       |     |         |      |       |          |        |    |
| SARS-CoV-2 NC_045512.2 | (16305)  | ATTCTTAT   | GTTGTAAAT     | GCTGTTAC   | GACCATG-----      | TC--          | ATATCAACAT      | CAC        | ---AT       | AAATTAGT    | CTTG                | TCTGTTAATCC  | GTATGTTT---- |                    |          |        |       |       |       |             |       |     |         |      |       |          |        |    |
|                        |          |            |               |            |                   |               |                 |            |             |             |                     | Section 1040 |              |                    |          |        |       |       |       |             |       |     |         |      |       |          |        |    |
|                        | (99745)  | 99745      | 99759         | 99770      | 99781             | 99792         | 99803           | 99814      | 99825       |             | 99840               |              |              |                    |          |        |       |       |       |             |       |     |         |      |       |          |        |    |
| T4 NC_000866.4         | (99305)  | GTGGTG     | GTACTCGTGCATC | TACTGCT    | TAAAGCA           | GTGT          | TTGGATATG       | GACCG      | CAAAC       | TGAT        | TCACAGTAC           | GCTAT        | TATAGT       | TCGTCGTAA          | TGAT     | GCTA   |       |       |       |             |       |     |         |      |       |          |        |    |
| SARS-CoV-2 NC_045512.2 | (16385)  | -----      | GCAA-----     | TGCTC      | CAGGTTGT          | GATG          | TCACAGATG       | TGACT      | CAACTT      | ACTTAG--G-A | GGTATG              | AGCTAT       | TTAT         | TTGTAA--           | ATCACA   |        |       |       |       |             |       |     |         |      |       |          |        |    |
|                        |          |            |               |            |                   |               |                 |            |             |             |                     | Section 1041 |              |                    |          |        |       |       |       |             |       |     |         |      |       |          |        |    |
|                        | (99841)  | 99841      | 99847         | 99858      | 99869             | 99880         | 99891           | 99902      | 99913       | 99924       | 99936               |              |              |                    |          |        |       |       |       |             |       |     |         |      |       |          |        |    |
| T4 NC_000866.4         | (99401)  | TTGTTCAA   | AGCGTTGTTT    | TTTCACT    | TAA               | GCGTGGT       | TGAAAA          | AGAT       | TTTAC       | GATAG       | TAA                 | CATCT        | ATATCG       | ATGAC              | TTTTTC   | GC     | AAAGG | TGGT  | T     | CAG         |       |     |         |      |       |          |        |    |
| SARS-CoV-2 NC_045512.2 | (16461)  | TA--AACC   | ACCA          | T          | TAGT              | TTTTC         | ATT--GT         | GTGC       | TAA         | TGGACA      | AG                  | TTTTT        | TGGT--       | TTATAT             | AAAAATAC | ATGTG  | TTGGT | TAGC  | GAT   | AA-TGTTACTG |       |     |         |      |       |          |        |    |
|                        |          |            |               |            |                   |               |                 |            |             |             |                     | Section 1042 |              |                    |          |        |       |       |       |             |       |     |         |      |       |          |        |    |
|                        | (99937)  | 99937      | 99946         | 99957      | 99968             | 99979         | 99990           | 100001     | 100012      |             | 100032              |              |              |                    |          |        |       |       |       |             |       |     |         |      |       |          |        |    |
| T4 NC_000866.4         | (99497)  | AATATA     | TTTT          | TGCAA      | CTG               | CA            | CAAA            | CTG        | CCAG        | AA          | GGCT                | TCT          | CTGG         | AAT                | TTTAA    | CTCT   | TGTCT | GGTGG | AT    | TAT         | CA    | T   | CAAA    | TGCT | G     | AAG      | TAACAG | CA |
| SARS-CoV-2 NC_045512.2 | (16550)  | ACTTTAA    | ---TGCAA      | TG--       | CAAC              | ATGT          | GACT            | GG         | ACAAAT      | -G          | CTGG                | TGA          | TTAC         | ATTT               | TAG      | CTAAC  | ACCTG | -TAC  | TG    | AAA         | GACTC | AAG | CTTTTTT | G    | CA    |          |        |    |
|                        |          |            |               |            |                   |               |                 |            |             |             |                     | Section 1043 |              |                    |          |        |       |       |       |             |       |     |         |      |       |          |        |    |
|                        | (100033) | 100033     | 100045        | 100056     | 100067            | 100078        | 100089          | 100100     | 100111      |             | 100128              |              |              |                    |          |        |       |       |       |             |       |     |         |      |       |          |        |    |
| T4 NC_000866.4         | (99597)  | GGAGA      | TTT           | GAT        | GG                | AAGCT         | TGG             | GA         | CTTCTTT     | GCT         | GAC                 | CGT          | GAA          | CTGT               | TGAC     | GTTCA  | ACT   | GTTT  | ATTGC | AGT         | TCT   | TGT | GCCG    | G    | TGAAT | CTTTAGAA |        |    |
| SARS-CoV-2 NC_045512.2 | (16639)  | GCAGA      | AAC           | GC         | TCA               | AAGCT         | ACT             | GA-----    | G           | GAGAC       | AT                  | T            | AAA          | CTGT               | CTTAT    | GGTATT | ----- | GCTAC | TGTAC | CGT         | GAAGT | G   | CTGT    | CTGA |       |          |        |    |

## SARS-CoV-2 &amp; T4.apr

|                        |          |                                                                               |                   |                    |                   |               |             |              |           |              |                               |
|------------------------|----------|-------------------------------------------------------------------------------|-------------------|--------------------|-------------------|---------------|-------------|--------------|-----------|--------------|-------------------------------|
|                        |          | Section 1044                                                                  |                   |                    |                   |               |             |              |           |              |                               |
|                        |          | (100129)                                                                      | 100129            | 100144             | 100155            | 100166        | 100177      | 100188       | 100199    | 100210       | 100224                        |
| T4 NC_000866.4         | (99688)  | A-CAGCATCTACTGTCCAAAAACACGTCGTTTCAATTGGGGATGCTCGCCAAAGATTGCTTAGTATTG-TGCTCTCC | TCCG              | CGTGAAACT          | GT                | AGTTG         |             |              |           |              |                               |
| SARS-CoV-2 NC_045512.2 | (16716)  | CAGAGAAATACATCTTCA                                                            | TGGGAAGT          | TGGTAAACCTAGAC---  | CACCACTTAACCGA-AA | TATGTC        | TTTACTGG    | TAT          | CGTGTAACT | AA           | AAACA                         |
|                        |          | Section 1045                                                                  |                   |                    |                   |               |             |              |           |              |                               |
|                        |          | (100225)                                                                      | 100225            | 100232             | 100243            | 100254        | 100265      | 100276       | 100287    | 100298       | 100309 100320                 |
| T4 NC_000866.4         | (99787)  | GAAATTCCTGTAA                                                                 | CCCGTGCTGTTGATAAC | CTAGTCAAT          | TGGAGAACTGCGG     | CAGGTTCATACAC | CTGATAA     | TAACTTTTAA   | TATC      | AGTTCAAC     | CTATG                         |
| SARS-CoV-2 NC_045512.2 | (16808)  | GTA                                                                           | AAGTACAA          | TAGGAGA-G--TACA--  | CT-----           | TTGA          | AAAAGTGA    | C-TA         | TGGTGA    | ATGCTGTGTT   | TACCGAGGT---ACAA              |
|                        |          | Section 1046                                                                  |                   |                    |                   |               |             |              |           |              |                               |
|                        |          | (100321)                                                                      | 100321            | 100331             | 100342            | 100353        | 100364      | 100375       | 100386    | 100397       | 100416                        |
| T4 NC_000866.4         | (99878)  | CAGCAAT                                                                       | TGATGGTAA         | CCATAAGTATCAGTATGA | CAATAATAAT        | TGATGTGAAT    | CGTTGGGTTTC | CATTAGCAGCTG | ATATTGCT  | GGTTTAT      | GC                            |
| SARS-CoV-2 NC_045512.2 | (16889)  | A                                                                             | TTAA              | FGTGGTGA           | TTATTTGTG         | GTG-ACAT      | CACATA      | CAGTAATG     | C-----    | CATTA--AGTGC | AC---CTACAC                   |
|                        |          | Section 1047                                                                  |                   |                    |                   |               |             |              |           |              |                               |
|                        |          | (100417)                                                                      | 100417            | 100430             | 100441            | 100452        | 100463      | 100474       | 100485    | 100496       | 100512                        |
| T4 NC_000866.4         | (99974)  | GAACT                                                                         | GATAACG           | TATCTCAGAC         | TTGGATGTCTCC      | AGCTGG        | TTATAAT     | -CGTGG       | TCA       | GATCTCTAAC   | GTTATTAAC                     |
| SARS-CoV-2 NC_045512.2 | (16963)  | C                                                                             | AA                | GAGCAC---          | TATGTTAGAA        | TT-----       | ACTG        | GCTTATA      | CCCAACAC  | TCAATA       | TCTCA--G--ATG-AGT             |
|                        |          | Section 1048                                                                  |                   |                    |                   |               |             |              |           |              |                               |
|                        |          | (100513)                                                                      | 100513            | 100518             | 100529            | 100540        | 100551      | 100562       | 100573    | 100584       | 100595 100608                 |
| T4 NC_000866.4         | (100069) | GC                                                                            | TCA               | GCGCGA             | CCGTTTATACC-      | AAGAAGCTA     | TCAACCC     | GGTAACC      | GGTACAGG  | TGGTGA       | TGGTTACGTATTGTATGGT           |
| SARS-CoV-2 NC_045512.2 | (17041)  | TA                                                                            | TCA               | A----              | AAGGTTGG          | TATGCA        | AA-AAGTAT   | TCTACAC      | TCC--AG   | GGAC         | CACTGGTAC                     |
|                        |          | Section 1049                                                                  |                   |                    |                   |               |             |              |           |              |                               |
|                        |          | (100609)                                                                      | 100609            | 100617             | 100628            | 100639        | 100650      | 100661       | 100672    | 100683       | 100704                        |
| T4 NC_000866.4         | (100164) | TGTT                                                                          | CCTTCT            | CCATTTGAT          | CGTATTAAC         | GTTGTCG       | TCTGT       | TAAATA       | TGTTGA    | AAACGA       | ATATCGGAC                     |
| SARS-CoV-2 NC_045512.2 | (17130)  | CTAC                                                                          | CCTTCT            | GCTCG-CAT          | AGTGTATAC         | -AGGTTG       | CTCTCAT     | TGCCGC       | TGTTGA    | TGCACT       | ATGTGAGAGGCATT-AAAATAT--TTGCC |
|                        |          | Section 1050                                                                  |                   |                    |                   |               |             |              |           |              |                               |
|                        |          | (100705)                                                                      | 100705            | 100716             | 100727            | 100738        | 100749      | 100760       | 100771    | 100782       | 100800                        |
| T4 NC_000866.4         | (100260) | AAA--C                                                                        | AACGCGT           | TTACTCGT           | TCATTC            | CGCAC         | AGA         | AAC          | TGCCC     | AGTAC        | TTAC                          |
| SARS-CoV-2 NC_045512.2 | (17221)  | AAA                                                                           | TGTAGTAGAA        | TTATACCTG          | CACGTGCT          | CGTGT         | AGAGTG      | TTTTG        | ATAA      | TTCA         | AAGTGAAT                      |

## SARS-CoV-2 &amp; T4.apr

|                        |          |         |        |        |        |        |        |        |         |              |
|------------------------|----------|---------|--------|--------|--------|--------|--------|--------|---------|--------------|
|                        |          |         |        |        |        |        |        |        |         | Section 1051 |
|                        | (100801) | 100801  | 100815 | 100826 | 100837 | 100848 | 100859 | 100870 | 100881  | 100896       |
| T4 NC_000866.4         | (100354) | GTTTGC  | ATACAA | TAACAC | TCCGT  | CAGTA  | AATTG  | ATAGAA | TGAGTTT | GTGCAAC      |
| SARS-CoV-2 NC_045512.2 | (17312)  | CTGTAA  | ATGCA  | TTGCC  | TGAGAC | ---GA  | CAGCA  | ---G   | ATATAG  | TGCTTTT      |
|                        |          |         |        |        |        |        |        |        |         | Section 1052 |
|                        | (100897) | 100897  | 100903 | 100914 | 100925 | 100936 | 100947 | 100958 | 100969  | 100980       |
| T4 NC_000866.4         | (100450) | ACC     | TT--   | AAAC   | TT     | CGT    | AGCA   | CTG    | CTA     | CTGGT        |
| SARS-CoV-2 NC_045512.2 | (17397)  | CAA     | TGCC   | AGAT   | TA     | CGT    | GCTAA  | GCA    | CTA     | TGTGT        |
|                        |          |         |        |        |        |        |        |        |         | Section 1053 |
|                        | (100993) | 100993  | 101002 | 101013 | 101024 | 101035 | 101046 | 101057 | 101068  | 101088       |
| T4 NC_000866.4         | (100539) | TTCGG   | CAGGCC | ATAT   | AAAT   | CAC    | TATAT  | CCCTT  | AA      | TTCT         |
| SARS-CoV-2 NC_045512.2 | (17487)  | AGA     | AC     | CAG    | AAT    | AT     | TC     | CAAT   | CAG     | TGTGT        |
|                        |          |         |        |        |        |        |        |        |         | Section 1054 |
|                        | (101089) | 101089  | 101101 | 101112 | 101123 | 101134 | 101145 | 101156 | 101167  | 101184       |
| T4 NC_000866.4         | (100635) | T       | TTGT   | TA     | GATGA  | TGTAA  | CAC    | GAG    | GT      | TGAAT        |
| SARS-CoV-2 NC_045512.2 | (17578)  | A       | TTGT   | TA     | GACAC  | TGTGA  | ---GT  | GC     | ---T    | ---T         |
|                        |          |         |        |        |        |        |        |        |         | Section 1055 |
|                        | (101185) | 101185  | 101200 | 101211 | 101222 | 101233 | 101244 | 101255 | 101266  | 101280       |
| T4 NC_000866.4         | (100730) | GTTCCAA | T      | TA     | AAG    | CTAC   | TGCT   | CTAC   | CAG     | CTGGT        |
| SARS-CoV-2 NC_045512.2 | (17665)  | AAGGGT  | G      | T      | TA     | TCA    | CGCA   | TGAT   | GTTT    | CATCTG       |
|                        |          |         |        |        |        |        |        |        |         | Section 1056 |
|                        | (101281) | 101281  | 101288 | 101299 | 101310 | 101321 | 101332 | 101343 | 101354  | 101365       |
| T4 NC_000866.4         | (100826) | A       | TT     | CGA    | TGAC   | TGGA   | CTGTT  | ACAG   | TAAT    | GAAC         |
| SARS-CoV-2 NC_045512.2 | (17743)  | A       | AC     | C      | ---TG  | CT     | TGGA   | -----G | AAA     | AGCTG        |
|                        |          |         |        |        |        |        |        |        |         | Section 1057 |
|                        | (101377) | 101377  | 101387 | 101398 | 101409 | 101420 | 101431 | 101442 | 101453  | 101472       |
| T4 NC_000866.4         | (100922) | CG      | AAA    | T      | TAC    | TGG    | TGGA   | AAAC   | CTG     | ---          |
| SARS-CoV-2 NC_045512.2 | (17826)  | TC      | AAA    | C      | TGT    | TGA    | TTC    | ATC    | ACAG    | GCT          |

## SARS-CoV-2 &amp; T4.apr

|                        |          |                                                         |              |                |                      |                 |               |                  |            |                         |              |         |             |          |       |         |         |         |        |      |        |
|------------------------|----------|---------------------------------------------------------|--------------|----------------|----------------------|-----------------|---------------|------------------|------------|-------------------------|--------------|---------|-------------|----------|-------|---------|---------|---------|--------|------|--------|
|                        |          |                                                         |              |                |                      |                 |               |                  |            |                         | Section 1058 |         |             |          |       |         |         |         |        |      |        |
|                        | (101473) | 101473                                                  | 101486       | 101497         | 101508               | 101519          | 101530        | 101541           | 101552     | 101568                  |              |         |             |          |       |         |         |         |        |      |        |
| T4 NC_000866.4         | (101014) | AAATTAAAGGTCTGTGGCCTAC                                  | TAACTGGGGTGA | CTTC           | AATTAGATTGGATTCAACAA | TGAATCCA        | AACTTTTGA     | AGTA             | AACTCTTGCT | TCTCG                   |              |         |             |          |       |         |         |         |        |      |        |
| SARS-CoV-2 NC_045512.2 | (17915)  | -GATTTAATGTT-----GCTATTACCA-----GAGCAAAA-----GTAGGCATAC | TTGCA        | T              | AT                   | AG              | CT            | AT               | AA         | TGCTGATAGAGACCTTTATGACA |              |         |             |          |       |         |         |         |        |      |        |
|                        |          |                                                         |              |                |                      |                 |               |                  |            |                         | Section 1059 |         |             |          |       |         |         |         |        |      |        |
|                        | (101569) | 101569                                                  | 101574       | 101585         | 101596               | 101607          | 101618        | 101629           | 101640     | 101651                  | 101664       |         |             |          |       |         |         |         |        |      |        |
| T4 NC_000866.4         | (101110) | ATTA                                                    | TTGGGAATAA   | ATGAATGGGGAGAA | TCCCAT               | TCTGCTTA        | AAGCAGAGAA    | GTCCATTATAAAT    | ATAAC      | TATA                    | ATTC         | C       | CATTTGGGAGA | ATAC     |       |         |         |         |        |      |        |
| SARS-CoV-2 NC_045512.2 | (17987)  | AG--TTGCAATTTACAAGTCTTGA--                              | AA           | TCCACGT--AGG-- | AA                   | TGTGGCAACTTTACA | AGCTGAAA      | ATGTAAC          | AGGAC      | -----TCTTT              | AAAG         |         |             |          |       |         |         |         |        |      |        |
|                        |          |                                                         |              |                |                      |                 |               |                  |            |                         | Section 1060 |         |             |          |       |         |         |         |        |      |        |
|                        | (101665) | 101665                                                  | 101673       | 101684         | 101695               | 101706          | 101717        | 101728           | 101739     | 101760                  |              |         |             |          |       |         |         |         |        |      |        |
| T4 NC_000866.4         | (101206) | AATGAAATTTAATGTATT                                      | AAGTTTGT     | TGCTCCAT       | TGGGCTA              | AAATGGACGAACG   | AAATTTTAAAG   | ACCAAGAAA        | AAAGAA     | GATCTT                  | GTTTC        | CATTAC  |             |          |       |         |         |         |        |      |        |
| SARS-CoV-2 NC_045512.2 | (18068)  | ATTGTAGT--AAGGTAA                                       | CTGGTT       | -----ACATC     | CTA                  | CA              | AGGC          | -----AC          | ---CTACA   | ACCTC                   | ---AGTGTT    | GACACT  | TAAATTC     | AAAAC    |       |         |         |         |        |      |        |
|                        |          |                                                         |              |                |                      |                 |               |                  |            |                         | Section 1061 |         |             |          |       |         |         |         |        |      |        |
|                        | (101761) | 101761                                                  | 101772       | 101783         | 101794               | 101805          | 101816        | 101827           | 101838     | 101856                  |              |         |             |          |       |         |         |         |        |      |        |
| T4 NC_000866.4         | (101302) | AGCCCCA                                                 | AAGCTTGATG   | ATGGAGCAAGAGAA | TTTGA                | AGTAAGCTCGAAT   | G---AAGCTGCT  | TCTCCT           | TATAA      | TGCTG                   | CATTC        | CAAC    | AATTT       | TTTGG    |       |         |         |         |        |      |        |
| SARS-CoV-2 NC_045512.2 | (18144)  | T-----G                                                 | AAGGTTATGT   | T-----G        | TTGACAT--            | AC              | TGGCATACCTAAG | GACATGACCTATAGAA | AGCT       | CATCTCTATGA--           | TGGGTT       |         |             |          |       |         |         |         |        |      |        |
|                        |          |                                                         |              |                |                      |                 |               |                  |            |                         | Section 1062 |         |             |          |       |         |         |         |        |      |        |
|                        | (101857) | 101857                                                  | 101871       | 101882         | 101893               | 101904          | 101915        | 101926           | 101937     | 101952                  |              |         |             |          |       |         |         |         |        |      |        |
| T4 NC_000866.4         | (101395) | TTCAATGAA                                               | CCAGGAATGA   | AAAC           | TACTCTGT             | AGCTTATTGATA    | CATATC        | GTAA             | TC         | TCA                     | TGAATA       | ACTAT   | GAA         | GTAGATA  | ATGC  | AGTT    | CAGAAAT |         |        |      |        |
| SARS-CoV-2 NC_045512.2 | (18218)  | TTAAATGAA                                               | TTA-----TC   | AA             | GTAA                 | TGGT            | TACCTA        | ---A--           | CAT---     | GT                      | TATCA        | CCGCGA  | AGAG        | GCTA     | TAGAC | ATGT    | ACGTG   | CATGGAT |        |      |        |
|                        |          |                                                         |              |                |                      |                 |               |                  |            |                         | Section 1063 |         |             |          |       |         |         |         |        |      |        |
|                        | (101953) | 101953                                                  | 101959       | 101970         | 101981               | 101992          | 102003        | 102014           | 102025     | 102036                  | 102048       |         |             |          |       |         |         |         |        |      |        |
| T4 NC_000866.4         | (101491) | CGTTT                                                   | CA           | GATG           | CTATC                | GTCTAT          | GAAGAT        | GA               | TACT       | GAAG                    | TCGTAG       | CGTTA   | AATTT       | GGATAA   | ATCT  | AAA     | TTTAGCC | CAAAAA  | TTAAAA | ATAT | GATGTT |
| SARS-CoV-2 NC_045512.2 | (18300)  | TGGCT                                                   | TTC          | GATG           | TCGAG                | GGTGT           | CATGCT        | ACTA             | GAGA       | GAAG                    | CTGT         | TGGTACC | AATTT       | -----ACC | TTTA  | CAGCT   | AGGT    | TTT     | TCTAC  | AGG  | -TGTT  |
|                        |          |                                                         |              |                |                      |                 |               |                  |            |                         | Section 1064 |         |             |          |       |         |         |         |        |      |        |
|                        | (102049) | 102049                                                  | 102058       | 102069         | 102080               | 102091          | 102102        | 102113           | 102124     | 102144                  |              |         |             |          |       |         |         |         |        |      |        |
| T4 NC_000866.4         | (101587) | AGATGAAT                                                | TAG          | TGATGT         | T-TAAATCAT           | CTAT            | CGTTT         | CAAC             | GAAA       | AGGTT                   | CTGAT        | CATTTT  | AGACGT      | TGGTAT   | TGATT | CAAGAAT | TTTCTT  | TC      |        |      |        |
| SARS-CoV-2 NC_045512.2 | (18385)  | AACC---                                                 | TAGT         | TGCTGTACC      | TACAGGT              | TATGT           | TGATACAC      | CTAA             | TATA       | -CAGAT                  | TTT          | CCAGAG  | TAG---      | TGCTAA   | AC    | CA      | CCGCC   | TGGAGA  | TC     |      |        |



## SARS-CoV-2 &amp; T4.apr

|                        |          |          |            |             |            |            |               |          |           |              |            |               |            |            |              |            |         |           |        |          |       |     |          |     |     |
|------------------------|----------|----------|------------|-------------|------------|------------|---------------|----------|-----------|--------------|------------|---------------|------------|------------|--------------|------------|---------|-----------|--------|----------|-------|-----|----------|-----|-----|
|                        |          |          |            |             |            |            |               |          |           | Section 1065 |            |               |            |            |              |            |         |           |        |          |       |     |          |     |     |
|                        | (102145) | 102145   | 102157     | 102168      | 102179     | 102190     | 102201        | 102212   | 102223    | 102240       |            |               |            |            |              |            |         |           |        |          |       |     |          |     |     |
| T4 NC_000866.4         | (101682) | ATAAAATC | ATTGATC    | CAAAACGT    | CAAAAGAGG  | CATAAAAGAA | TTACGTAGATTAG | ACCCTCG  | CCAAGTTC  | AGTATGTT     | CGTGAAATTA | TAAACAG       |            |            |              |            |         |           |        |          |       |     |          |     |     |
| SARS-CoV-2 NC_045512.2 | (18473)  | A-----   | ATTTAAAC   | CCTCATAC    | CACTTAT    | GTACAAAG   | GACTTCCT      | TGGAAT   | GTAGTG    | CGTAT        | AA--AGAT   | TGTAC--AAATGT | TAAAGTG    |            |              |            |         |           |        |          |       |     |          |     |     |
|                        |          |          |            |             |            |            |               |          |           | Section 1066 |            |               |            |            |              |            |         |           |        |          |       |     |          |     |     |
|                        | (102241) | 102241   | 102256     | 102267      | 102278     | 102289     | 102300        | 102311   | 102322    | 102336       |            |               |            |            |              |            |         |           |        |          |       |     |          |     |     |
| T4 NC_000866.4         | (101778) | AAAC     | TGAAGCTGGC | CAAAAATAGTT | AAAGGTTT   | CAAGAATAT  | TTTATATAT     | TGATACTG | CCCATGAGT | CATATGCAT    | TGATGGT    | TAGATG        | TATG       |            |              |            |         |           |        |          |       |     |          |     |     |
| SARS-CoV-2 NC_045512.2 | (18554)  | ACAC     | AC-----TTA | -----       | AAATCTCT   | TGACAGAGT  | CGTATT        | TGT----- | CTTATGGG  | CAATG        | GCTTGA     | GTGT          | GACATCTATG |            |              |            |         |           |        |          |       |     |          |     |     |
|                        |          |          |            |             |            |            |               |          |           | Section 1067 |            |               |            |            |              |            |         |           |        |          |       |     |          |     |     |
|                        | (102337) | 102337   | 102344     | 102355      | 102366     | 102377     | 102388        | 102399   | 102410    | 102421       | 102432     |               |            |            |              |            |         |           |        |          |       |     |          |     |     |
| T4 NC_000866.4         | (101874) | AAGC     | TGGCACAA   | AAAAATA     | AAATTT     | CTAAAGCT   | GGCTGCT       | TATGCC   | ATTCTGG   | ATTAGT       | CAT---     | TGTGCGGT      | AAAAATAT   | TCATCGGGTA |              |            |         |           |        |          |       |     |          |     |     |
| SARS-CoV-2 NC_045512.2 | (18625)  | AAGTA    | TTTTGTG    | AAAAATA     | GGAC--     | GTGAGC     | GCACGT        | GTGT     | CTATG     | TGATAGAC     | GTGCC      | ACATGCT       | TTTTCCAC   | TGCTTCA    | AGACACT      | TATGCC--TG |         |           |        |          |       |     |          |     |     |
|                        |          |          |            |             |            |            |               |          |           | Section 1068 |            |               |            |            |              |            |         |           |        |          |       |     |          |     |     |
|                        | (102433) | 102433   | 102443     | 102454      | 102465     | 102476     | 102487        | 102498   | 102509    | 102528       |            |               |            |            |              |            |         |           |        |          |       |     |          |     |     |
| T4 NC_000866.4         | (101965) | TTTGCATC | GTGCTG     | TTAAAC      | CTGCTAAC   | --CAAT     | TAAAA--       | TTATTAG  | -AAGAT    | GTCTGTAGT    | CATT       | TATCGCA       | --T        | TA         | CTCGTGCTCCTG | ACCGTC     |         |           |        |          |       |     |          |     |     |
| SARS-CoV-2 NC_045512.2 | (18717)  | TTGGCATC | ATTCTATT   | GGATT       | TGATTAC    | GTCTAT     | AA            | TCCGT    | TTATG     | ATTGAT       | GTTC       | CAAC          | AA         | TGGGG      | TTT          | TACAGG     | -TAACCT | TACAAAGCA | ACCATG |          |       |     |          |     |     |
|                        |          |          |            |             |            |            |               |          |           | Section 1069 |            |               |            |            |              |            |         |           |        |          |       |     |          |     |     |
|                        | (102529) | 102529   | 102542     | 102553      | 102564     | 102575     | 102586        | 102597   | 102608    | 102624       |            |               |            |            |              |            |         |           |        |          |       |     |          |     |     |
| T4 NC_000866.4         | (102054) | GTGTTT   | GGTAT      | GTAGAC      | CACAGGTAAT | ATGCTG     | CTCGTA        | AAGCTG   | TGAGCA    | CATGCA       | ACATGTTA   | TGAAC         | ACGATG     | AAAA       | AACC         | GTG        | TAGTAT  | TATG      |        |          |       |     |          |     |     |
| SARS-CoV-2 NC_045512.2 | (18812)  | ATCTGT   | TATGT      | CAAGTC      | CATGGTAAT  | GCACAT     | GTAGC         | TAGTTG   | TGATG     | CAATCATG     | ACTAGG     | ----          | TGTCTA     | -GCTG      | TCC          | ACGA       | GTG     | CTTTGT    | TAA    |          |       |     |          |     |     |
|                        |          |          |            |             |            |            |               |          |           | Section 1070 |            |               |            |            |              |            |         |           |        |          |       |     |          |     |     |
|                        | (102625) | 102625   | 102630     | 102641      | 102652     | 102663     | 102674        | 102685   | 102696    | 102707       | 102720     |               |            |            |              |            |         |           |        |          |       |     |          |     |     |
| T4 NC_000866.4         | (102150) | ATGCAT   | CAACAGG    | TAAA----    | ATAAAAA    | ATCAACAG   | C-ATA         | ATA      | TGTCT     | ATGACC       | GAA        | GACTATT       | TG---      | GT         | TG           | CAGCG      | CCGT    | GATG      | G      | TAAAGCTG | T     |     |          |     |     |
| SARS-CoV-2 NC_045512.2 | (18903)  | GC       | GTGTTG     | ACTGG       | ACTATTGA   | ATA        | TCCTAT        | AA       | TTGGTG    | ATGA         | AC         | TGAAG         | ATTA       | AT         | GCG          | GCTTG      | TAGAAA  | GGTT      | CAAC   | ACATG    | GT    | TGT | TAAAGCTG | C   |     |
|                        |          |          |            |             |            |            |               |          |           | Section 1071 |            |               |            |            |              |            |         |           |        |          |       |     |          |     |     |
|                        | (102721) | 102721   | 102729     | 102740      | 102751     | 102762     | 102773        | 102784   | 102795    | 102816       |            |               |            |            |              |            |         |           |        |          |       |     |          |     |     |
| T4 NC_000866.4         | (102238) | GACAGA   | AGTTGAT    | ACTCTT      | CC         | TGGTGCT    | GATAA         | TAC      | TGGCAA    | TATGG        | AAGA       | TATT          | CGT        | TG         | GT           | T          | TAGA    | CAAGCT    | C-TT   | TATATG   | GCA-- | TT  | ACG      | TGT |     |
| SARS-CoV-2 NC_045512.2 | (18999)  | ATTATT   | AGCA       | GACAAAT     | TC         | CA         | GTCTT         | CA       | CGACAT    | TGGTAA       | CCCTAA     | AAGC          | TATT       | AAG        | TG           | TG         | TACCT   | CAAGCT    | GATG   | TAGA     | AT    | GGA | AGTT     | CTA | TGA |

## SARS-CoV-2 & T4.apr

|                        |          |          |                  |                 |                 |                |                |                  |                 |                   |               |              |
|------------------------|----------|----------|------------------|-----------------|-----------------|----------------|----------------|------------------|-----------------|-------------------|---------------|--------------|
|                        |          |          |                  |                 |                 |                |                |                  |                 |                   | Section 1072  |              |
|                        | (102817) | 102817   | 102828           | 102839          | 102850          | 102861         | 102872         | 102883           | 102894          | 102912            |               |              |
| T4 NC                  | 000866.4 | (102331) | TCCTCTTT         | CACGCA          | TCCGCAAG        | ACCAACAAGGC    | GGTGTGATG      | TTTGATTTC        | TGGAACTAGCATTAC | ACGTGAT---        | GAATTACGG     | TTTGCTAAATT  |
| SARS-CoV-2 NC_045512.2 | (19095)  |          | TGCAAGCCTTG      | ---             | AGTGACAAAGC     | ---            | TTATAAAATAGAA  | GAAATTATTCTA     | ---             | TTCCTATGCCAC      | ACATCTCGAC    | AAATT        |
|                        |          |          |                  |                 |                 |                |                |                  |                 |                   | Section 1073  |              |
|                        | (102913) | 102913   | 102927           | 102938          | 102949          | 102960         | 102971         | 102982           | 102993          | 103008            |               |              |
| T4 NC                  | 000866.4 | (102424) | TATTCGTGAGT      | TACAGCACAG      | TTT--GAA        | GAGTTTTCCTAGAT | CCGCTTAAACAAAT | CTTTTTCCTTAAAGG  | TATAATCACAGA    | AGATGAGT          | G             |              |
| SARS-CoV-2 NC_045512.2 | (19170)  |          | CACAGATG-GT      | GTATGCTATT      | TTTGGAAATTGCA   | ATGTTCGATAGAT  | ATCCTGCTAA---  | TCATTGCTTTGTAGAT | T---            | TGACACTA-----     | G             |              |
|                        |          |          |                  |                 |                 |                |                |                  |                 |                   | Section 1074  |              |
|                        | (103009) | 103009   | 103015           | 103026          | 103037          | 103048         | 103059         | 103070           | 103081          | 103092            | 103104        |              |
| T4 NC                  | 000866.4 | (102518) | AATGATGAAATAAA   | TAAATATTAAGAT   | TAGAATTTCAT     | TCGGGATAGCTAC  | TTTGC          | TGAGCTCAAA       | GAGCAGAA        | ATTTTGGAA         | CGAAGAATTAA   | TAT          |
| SARS-CoV-2 NC_045512.2 | (19251)  |          | AGTGCATATC----   | TAACTTAACT      | TGCCTGGTTGT     | TGATGGTGCAGT   | TTGTA          | TGTAAATAAACAT    | GCAATCC         | ACACACCAG         | CTTTTGATAAAGT |              |
|                        |          |          |                  |                 |                 |                |                |                  |                 |                   | Section 1075  |              |
|                        | (103105) | 103105   | 103114           | 103125          | 103136          | 103147         | 103158         | 103169           | 103180          | 103200            |               |              |
| T4 NC                  | 000866.4 | (102613) | GCTAACCATGGCAGAA | C-CATTTATTGGT   | TAAATATATTCTC   | ACAGAACTGCTATG | AAAGACATTT     | TGCAGATGACT      | GATGAGAA        | AGAAATAGA         | ACAA          |              |
| SARS-CoV-2 NC_045512.2 | (19342)  |          | GCTTTTGTTAATTT   | AAAACAATTACCATT | T-TTCTATTACTCTG | ACAGT--CATG    | TGAGTCTCAT     | TGGAAAACAAG      | TAGTGTCTAGAT    | ATAGAT            | TTA           |              |
|                        |          |          |                  |                 |                 |                |                |                  |                 |                   | Section 1076  |              |
|                        | (103201) | 103201   | 103213           | 103224          | 103235          | 103246         | 103257         | 103268           | 103279          | 103296            |               |              |
| T4 NC                  | 000866.4 | (102707) | GAAGCCAAGCAAT    | TGAAGAGAGT      | CTAAAGAGGCT     | CG-TTTCCAA     | GACCCGGA       | CCAAGAACAGAG     | GATTTTAAAT      | TGGAAGGTT         | TAATTGAAG--   |              |
| SARS-CoV-2 NC_045512.2 | (19434)  |          | TGTAACAATAAGT    | CTGCTACGTGT     | ATAACACGTTG     | CAATTTAGGT     | GGTGTCTGT      | CTGTAGACATCAT    | GCTAATGAGTAC    | AGATTGTATCT       | TCGATGC       |              |
|                        |          |          |                  |                 |                 |                |                |                  |                 |                   | Section 1077  |              |
|                        | (103297) | 103297   | 103312           | 103323          | 103334          | 103345         | 103356         | 103367           | 103378          | 103392            |               |              |
| T4 NC                  | 000866.4 | (102800) | CTATTAAAT---     | CAACGACCTCG--   | TAGCG-CTC       | GTAAATTA----   | TTTGC          | TGAAGCCAT        | GGCTGC          | CAAGAAC           | GATTGATTTAAT  | TAAAGAG      |
| SARS-CoV-2 NC_045512.2 | (19530)  |          | TATAACATGATGA    | TCTCAGCTG       | GCTTTAGCTT      | TAGCTTGTTGG    | GTTTACAACAA    | TTTGTAT--        | ACTTAT          | AACCTCTG          | GAACACTTTTACA | AGACTTCAGAGT |
|                        |          |          |                  |                 |                 |                |                |                  |                 |                   | Section 1078  |              |
|                        | (103393) | 103393   | 103400           | 103411          | 103422          | 103433         | 103444         | 103455           | 103466          | 103477            | 103488        |              |
| T4 NC                  | 000866.4 | (102884) | AAAATA           | TCGCTAT         | CGCTCGCAAT      | TCTTAATCGA     | AGGTGAAGAACC   | TGAAGACGAGGA     | TGAAGATGA       | CGAAGAT           | AGTGATGATAAA  | GACG         |
| SARS-CoV-2 NC_045512.2 | (19624)  |          | TTAGAA--         | AATGTGGCT       | TTTAAATGTTG     | TAAATAAGGAC    | ACTTTGA        | TGGACACAGG       | GGAAGTACC       | AGTT-TCTATCATTA-- | ATAACACTGTTT  |              |

## SARS-CoV-2 & T4.apr

|                        |          |          |        |        |        |        |        |        |        |        |        |              |       |      |       |      |      |     |       |       |        |     |       |      |        |      |     |     |     |     |       |     |      |      |      |       |     |     |     |     |     |     |      |     |     |     |     |     |     |     |     |     |     |     |     |     |     |     |     |     |     |     |     |     |     |     |     |     |     |     |     |     |     |     |     |     |     |     |     |     |     |     |     |     |     |     |     |     |     |     |     |     |     |     |     |     |     |     |     |     |     |     |     |     |     |     |     |     |     |     |     |     |     |     |     |     |     |     |     |     |     |     |     |     |     |     |     |     |     |     |     |     |     |     |     |     |     |     |     |     |     |     |     |     |     |     |     |     |     |     |     |     |     |     |     |     |     |     |     |     |     |     |     |     |     |     |     |     |     |     |     |     |     |     |     |     |     |     |     |     |     |     |     |     |     |     |     |     |     |     |     |     |     |     |     |     |     |     |     |     |     |     |     |     |     |     |     |     |     |     |     |     |     |     |     |     |     |     |     |     |     |     |     |     |     |     |     |     |     |     |     |     |     |     |     |     |     |     |     |     |     |     |     |     |     |     |     |     |     |     |     |     |     |     |     |     |     |     |     |     |     |     |     |     |     |     |     |     |     |     |     |     |     |     |     |     |     |     |     |     |     |     |     |     |     |     |     |     |     |     |     |     |     |     |     |     |     |     |     |     |     |     |     |     |     |     |     |     |     |     |     |     |     |     |     |     |     |     |     |     |     |     |     |     |     |     |     |     |     |     |     |     |     |     |     |     |     |     |     |     |     |     |     |     |     |     |     |     |     |     |     |     |     |     |     |     |     |     |     |     |     |     |     |     |     |     |     |     |     |     |     |     |     |     |     |     |     |     |     |     |     |     |     |     |     |     |     |     |     |     |     |     |     |     |     |     |     |     |     |     |     |     |     |     |     |     |     |     |     |     |     |     |     |     |     |     |     |     |     |     |     |     |     |     |     |     |     |     |     |     |     |     |     |     |     |     |     |     |     |     |     |     |     |     |     |     |     |     |     |     |     |     |     |     |     |     |     |     |     |     |     |     |     |     |     |     |     |     |     |     |     |     |     |     |     |     |     |     |     |     |     |     |     |     |     |     |     |     |     |     |     |     |     |     |     |     |     |     |     |     |     |     |     |     |     |
|------------------------|----------|----------|--------|--------|--------|--------|--------|--------|--------|--------|--------|--------------|-------|------|-------|------|------|-----|-------|-------|--------|-----|-------|------|--------|------|-----|-----|-----|-----|-------|-----|------|------|------|-------|-----|-----|-----|-----|-----|-----|------|-----|-----|-----|-----|-----|-----|-----|-----|-----|-----|-----|-----|-----|-----|-----|-----|-----|-----|-----|-----|-----|-----|-----|-----|-----|-----|-----|-----|-----|-----|-----|-----|-----|-----|-----|-----|-----|-----|-----|-----|-----|-----|-----|-----|-----|-----|-----|-----|-----|-----|-----|-----|-----|-----|-----|-----|-----|-----|-----|-----|-----|-----|-----|-----|-----|-----|-----|-----|-----|-----|-----|-----|-----|-----|-----|-----|-----|-----|-----|-----|-----|-----|-----|-----|-----|-----|-----|-----|-----|-----|-----|-----|-----|-----|-----|-----|-----|-----|-----|-----|-----|-----|-----|-----|-----|-----|-----|-----|-----|-----|-----|-----|-----|-----|-----|-----|-----|-----|-----|-----|-----|-----|-----|-----|-----|-----|-----|-----|-----|-----|-----|-----|-----|-----|-----|-----|-----|-----|-----|-----|-----|-----|-----|-----|-----|-----|-----|-----|-----|-----|-----|-----|-----|-----|-----|-----|-----|-----|-----|-----|-----|-----|-----|-----|-----|-----|-----|-----|-----|-----|-----|-----|-----|-----|-----|-----|-----|-----|-----|-----|-----|-----|-----|-----|-----|-----|-----|-----|-----|-----|-----|-----|-----|-----|-----|-----|-----|-----|-----|-----|-----|-----|-----|-----|-----|-----|-----|-----|-----|-----|-----|-----|-----|-----|-----|-----|-----|-----|-----|-----|-----|-----|-----|-----|-----|-----|-----|-----|-----|-----|-----|-----|-----|-----|-----|-----|-----|-----|-----|-----|-----|-----|-----|-----|-----|-----|-----|-----|-----|-----|-----|-----|-----|-----|-----|-----|-----|-----|-----|-----|-----|-----|-----|-----|-----|-----|-----|-----|-----|-----|-----|-----|-----|-----|-----|-----|-----|-----|-----|-----|-----|-----|-----|-----|-----|-----|-----|-----|-----|-----|-----|-----|-----|-----|-----|-----|-----|-----|-----|-----|-----|-----|-----|-----|-----|-----|-----|-----|-----|-----|-----|-----|-----|-----|-----|-----|-----|-----|-----|-----|-----|-----|-----|-----|-----|-----|-----|-----|-----|-----|-----|-----|-----|-----|-----|-----|-----|-----|-----|-----|-----|-----|-----|-----|-----|-----|-----|-----|-----|-----|-----|-----|-----|-----|-----|-----|-----|-----|-----|-----|-----|-----|-----|-----|-----|-----|-----|-----|-----|-----|-----|-----|-----|-----|-----|-----|-----|-----|-----|-----|-----|-----|-----|-----|-----|-----|-----|-----|-----|-----|-----|-----|-----|-----|-----|-----|-----|-----|-----|-----|-----|-----|-----|-----|-----|-----|-----|-----|-----|-----|-----|-----|-----|-----|-----|-----|-----|-----|-----|-----|-----|-----|-----|-----|-----|-----|-----|-----|-----|-----|-----|-----|-----|-----|-----|-----|-----|-----|-----|-----|-----|-----|-----|-----|-----|-----|-----|-----|-----|-----|-----|-----|-----|-----|-----|-----|-----|-----|-----|-----|-----|-----|
|                        |          |          |        |        |        |        |        |        |        |        |        | Section 1079 |       |      |       |      |      |     |       |       |        |     |       |      |        |      |     |     |     |     |       |     |      |      |      |       |     |     |     |     |     |     |      |     |     |     |     |     |     |     |     |     |     |     |     |     |     |     |     |     |     |     |     |     |     |     |     |     |     |     |     |     |     |     |     |     |     |     |     |     |     |     |     |     |     |     |     |     |     |     |     |     |     |     |     |     |     |     |     |     |     |     |     |     |     |     |     |     |     |     |     |     |     |     |     |     |     |     |     |     |     |     |     |     |     |     |     |     |     |     |     |     |     |     |     |     |     |     |     |     |     |     |     |     |     |     |     |     |     |     |     |     |     |     |     |     |     |     |     |     |     |     |     |     |     |     |     |     |     |     |     |     |     |     |     |     |     |     |     |     |     |     |     |     |     |     |     |     |     |     |     |     |     |     |     |     |     |     |     |     |     |     |     |     |     |     |     |     |     |     |     |     |     |     |     |     |     |     |     |     |     |     |     |     |     |     |     |     |     |     |     |     |     |     |     |     |     |     |     |     |     |     |     |     |     |     |     |     |     |     |     |     |     |     |     |     |     |     |     |     |     |     |     |     |     |     |     |     |     |     |     |     |     |     |     |     |     |     |     |     |     |     |     |     |     |     |     |     |     |     |     |     |     |     |     |     |     |     |     |     |     |     |     |     |     |     |     |     |     |     |     |     |     |     |     |     |     |     |     |     |     |     |     |     |     |     |     |     |     |     |     |     |     |     |     |     |     |     |     |     |     |     |     |     |     |     |     |     |     |     |     |     |     |     |     |     |     |     |     |     |     |     |     |     |     |     |     |     |     |     |     |     |     |     |     |     |     |     |     |     |     |     |     |     |     |     |     |     |     |     |     |     |     |     |     |     |     |     |     |     |     |     |     |     |     |     |     |     |     |     |     |     |     |     |     |     |     |     |     |     |     |     |     |     |     |     |     |     |     |     |     |     |     |     |     |     |     |     |     |     |     |     |     |     |     |     |     |     |     |     |     |     |     |     |     |     |     |     |     |     |     |     |     |     |     |     |     |     |     |     |     |     |     |     |     |     |     |     |     |     |     |     |     |     |     |     |     |     |     |     |     |     |     |     |     |     |     |     |     |     |     |     |     |     |     |
|                        | (103489) | 103489   | 103499 | 103510 | 103521 | 103532 | 103543 | 103554 | 103565 | 103584 |        |              |       |      |       |      |      |     |       |       |        |     |       |      |        |      |     |     |     |     |       |     |      |      |      |       |     |     |     |     |     |     |      |     |     |     |     |     |     |     |     |     |     |     |     |     |     |     |     |     |     |     |     |     |     |     |     |     |     |     |     |     |     |     |     |     |     |     |     |     |     |     |     |     |     |     |     |     |     |     |     |     |     |     |     |     |     |     |     |     |     |     |     |     |     |     |     |     |     |     |     |     |     |     |     |     |     |     |     |     |     |     |     |     |     |     |     |     |     |     |     |     |     |     |     |     |     |     |     |     |     |     |     |     |     |     |     |     |     |     |     |     |     |     |     |     |     |     |     |     |     |     |     |     |     |     |     |     |     |     |     |     |     |     |     |     |     |     |     |     |     |     |     |     |     |     |     |     |     |     |     |     |     |     |     |     |     |     |     |     |     |     |     |     |     |     |     |     |     |     |     |     |     |     |     |     |     |     |     |     |     |     |     |     |     |     |     |     |     |     |     |     |     |     |     |     |     |     |     |     |     |     |     |     |     |     |     |     |     |     |     |     |     |     |     |     |     |     |     |     |     |     |     |     |     |     |     |     |     |     |     |     |     |     |     |     |     |     |     |     |     |     |     |     |     |     |     |     |     |     |     |     |     |     |     |     |     |     |     |     |     |     |     |     |     |     |     |     |     |     |     |     |     |     |     |     |     |     |     |     |     |     |     |     |     |     |     |     |     |     |     |     |     |     |     |     |     |     |     |     |     |     |     |     |     |     |     |     |     |     |     |     |     |     |     |     |     |     |     |     |     |     |     |     |     |     |     |     |     |     |     |     |     |     |     |     |     |     |     |     |     |     |     |     |     |     |     |     |     |     |     |     |     |     |     |     |     |     |     |     |     |     |     |     |     |     |     |     |     |     |     |     |     |     |     |     |     |     |     |     |     |     |     |     |     |     |     |     |     |     |     |     |     |     |     |     |     |     |     |     |     |     |     |     |     |     |     |     |     |     |     |     |     |     |     |     |     |     |     |     |     |     |     |     |     |     |     |     |     |     |     |     |     |     |     |     |     |     |     |     |     |     |     |     |     |     |     |     |     |     |     |     |     |     |     |     |     |     |     |     |     |     |     |     |     |
| T4 NC                  | 000866.4 | (102980) | ACAA   | AAAAG  | ACGA   | AGACTC | TGAC   | GAGA   | CGAG   | GATG   | AATA   | ATGCTT       | CTGAT | CCCT | GAAA  | CTCA | TGA  | ATT | AGTTC | TCGAG | GAATGT | CGA | AG    | CAC  | T      |      |     |     |     |     |       |     |      |      |      |       |     |     |     |     |     |     |      |     |     |     |     |     |     |     |     |     |     |     |     |     |     |     |     |     |     |     |     |     |     |     |     |     |     |     |     |     |     |     |     |     |     |     |     |     |     |     |     |     |     |     |     |     |     |     |     |     |     |     |     |     |     |     |     |     |     |     |     |     |     |     |     |     |     |     |     |     |     |     |     |     |     |     |     |     |     |     |     |     |     |     |     |     |     |     |     |     |     |     |     |     |     |     |     |     |     |     |     |     |     |     |     |     |     |     |     |     |     |     |     |     |     |     |     |     |     |     |     |     |     |     |     |     |     |     |     |     |     |     |     |     |     |     |     |     |     |     |     |     |     |     |     |     |     |     |     |     |     |     |     |     |     |     |     |     |     |     |     |     |     |     |     |     |     |     |     |     |     |     |     |     |     |     |     |     |     |     |     |     |     |     |     |     |     |     |     |     |     |     |     |     |     |     |     |     |     |     |     |     |     |     |     |     |     |     |     |     |     |     |     |     |     |     |     |     |     |     |     |     |     |     |     |     |     |     |     |     |     |     |     |     |     |     |     |     |     |     |     |     |     |     |     |     |     |     |     |     |     |     |     |     |     |     |     |     |     |     |     |     |     |     |     |     |     |     |     |     |     |     |     |     |     |     |     |     |     |     |     |     |     |     |     |     |     |     |     |     |     |     |     |     |     |     |     |     |     |     |     |     |     |     |     |     |     |     |     |     |     |     |     |     |     |     |     |     |     |     |     |     |     |     |     |     |     |     |     |     |     |     |     |     |     |     |     |     |     |     |     |     |     |     |     |     |     |     |     |     |     |     |     |     |     |     |     |     |     |     |     |     |     |     |     |     |     |     |     |     |     |     |     |     |     |     |     |     |     |     |     |     |     |     |     |     |     |     |     |     |     |     |     |     |     |     |     |     |     |     |     |     |     |     |     |     |     |     |     |     |     |     |     |     |     |     |     |     |     |     |     |     |     |     |     |     |     |     |     |     |     |     |     |     |     |     |     |     |     |     |     |     |     |     |     |     |     |     |     |     |     |     |     |     |     |     |     |     |     |     |     |     |     |
| SARS-CoV-2 NC_045512.2 | (19715)  | ACAC     | AAAAG  | TTGA   | TGGTGT | TGA    | TG     | AGA    | ATTG   | TTT    | TGAA   | -AATA        | AA    | CAA  | CATTA | CC   | TGTT | AA  | TGTA  | GC    | ATT    | T   | GAGCT | TTGG | GCTAAG | CGCA | AC  | AT  | T   |     |       |     |      |      |      |       |     |     |     |     |     |     |      |     |     |     |     |     |     |     |     |     |     |     |     |     |     |     |     |     |     |     |     |     |     |     |     |     |     |     |     |     |     |     |     |     |     |     |     |     |     |     |     |     |     |     |     |     |     |     |     |     |     |     |     |     |     |     |     |     |     |     |     |     |     |     |     |     |     |     |     |     |     |     |     |     |     |     |     |     |     |     |     |     |     |     |     |     |     |     |     |     |     |     |     |     |     |     |     |     |     |     |     |     |     |     |     |     |     |     |     |     |     |     |     |     |     |     |     |     |     |     |     |     |     |     |     |     |     |     |     |     |     |     |     |     |     |     |     |     |     |     |     |     |     |     |     |     |     |     |     |     |     |     |     |     |     |     |     |     |     |     |     |     |     |     |     |     |     |     |     |     |     |     |     |     |     |     |     |     |     |     |     |     |     |     |     |     |     |     |     |     |     |     |     |     |     |     |     |     |     |     |     |     |     |     |     |     |     |     |     |     |     |     |     |     |     |     |     |     |     |     |     |     |     |     |     |     |     |     |     |     |     |     |     |     |     |     |     |     |     |     |     |     |     |     |     |     |     |     |     |     |     |     |     |     |     |     |     |     |     |     |     |     |     |     |     |     |     |     |     |     |     |     |     |     |     |     |     |     |     |     |     |     |     |     |     |     |     |     |     |     |     |     |     |     |     |     |     |     |     |     |     |     |     |     |     |     |     |     |     |     |     |     |     |     |     |     |     |     |     |     |     |     |     |     |     |     |     |     |     |     |     |     |     |     |     |     |     |     |     |     |     |     |     |     |     |     |     |     |     |     |     |     |     |     |     |     |     |     |     |     |     |     |     |     |     |     |     |     |     |     |     |     |     |     |     |     |     |     |     |     |     |     |     |     |     |     |     |     |     |     |     |     |     |     |     |     |     |     |     |     |     |     |     |     |     |     |     |     |     |     |     |     |     |     |     |     |     |     |     |     |     |     |     |     |     |     |     |     |     |     |     |     |     |     |     |     |     |     |     |     |     |     |     |     |     |     |     |     |     |     |     |     |     |     |     |     |     |     |     |     |     |     |     |
|                        |          |          |        |        |        |        |        |        |        |        |        | Section 1080 |       |      |       |      |      |     |       |       |        |     |       |      |        |      |     |     |     |     |       |     |      |      |      |       |     |     |     |     |     |     |      |     |     |     |     |     |     |     |     |     |     |     |     |     |     |     |     |     |     |     |     |     |     |     |     |     |     |     |     |     |     |     |     |     |     |     |     |     |     |     |     |     |     |     |     |     |     |     |     |     |     |     |     |     |     |     |     |     |     |     |     |     |     |     |     |     |     |     |     |     |     |     |     |     |     |     |     |     |     |     |     |     |     |     |     |     |     |     |     |     |     |     |     |     |     |     |     |     |     |     |     |     |     |     |     |     |     |     |     |     |     |     |     |     |     |     |     |     |     |     |     |     |     |     |     |     |     |     |     |     |     |     |     |     |     |     |     |     |     |     |     |     |     |     |     |     |     |     |     |     |     |     |     |     |     |     |     |     |     |     |     |     |     |     |     |     |     |     |     |     |     |     |     |     |     |     |     |     |     |     |     |     |     |     |     |     |     |     |     |     |     |     |     |     |     |     |     |     |     |     |     |     |     |     |     |     |     |     |     |     |     |     |     |     |     |     |     |     |     |     |     |     |     |     |     |     |     |     |     |     |     |     |     |     |     |     |     |     |     |     |     |     |     |     |     |     |     |     |     |     |     |     |     |     |     |     |     |     |     |     |     |     |     |     |     |     |     |     |     |     |     |     |     |     |     |     |     |     |     |     |     |     |     |     |     |     |     |     |     |     |     |     |     |     |     |     |     |     |     |     |     |     |     |     |     |     |     |     |     |     |     |     |     |     |     |     |     |     |     |     |     |     |     |     |     |     |     |     |     |     |     |     |     |     |     |     |     |     |     |     |     |     |     |     |     |     |     |     |     |     |     |     |     |     |     |     |     |     |     |     |     |     |     |     |     |     |     |     |     |     |     |     |     |     |     |     |     |     |     |     |     |     |     |     |     |     |     |     |     |     |     |     |     |     |     |     |     |     |     |     |     |     |     |     |     |     |     |     |     |     |     |     |     |     |     |     |     |     |     |     |     |     |     |     |     |     |     |     |     |     |     |     |     |     |     |     |     |     |     |     |     |     |     |     |     |     |     |     |     |     |     |     |     |     |     |     |     |     |     |     |     |     |     |
|                        | (103585) | 103585   | 103598 | 103609 | 103620 | 103631 | 103642 | 103653 | 103664 | 103680 |        |              |       |      |       |      |      |     |       |       |        |     |       |      |        |      |     |     |     |     |       |     |      |      |      |       |     |     |     |     |     |     |      |     |     |     |     |     |     |     |     |     |     |     |     |     |     |     |     |     |     |     |     |     |     |     |     |     |     |     |     |     |     |     |     |     |     |     |     |     |     |     |     |     |     |     |     |     |     |     |     |     |     |     |     |     |     |     |     |     |     |     |     |     |     |     |     |     |     |     |     |     |     |     |     |     |     |     |     |     |     |     |     |     |     |     |     |     |     |     |     |     |     |     |     |     |     |     |     |     |     |     |     |     |     |     |     |     |     |     |     |     |     |     |     |     |     |     |     |     |     |     |     |     |     |     |     |     |     |     |     |     |     |     |     |     |     |     |     |     |     |     |     |     |     |     |     |     |     |     |     |     |     |     |     |     |     |     |     |     |     |     |     |     |     |     |     |     |     |     |     |     |     |     |     |     |     |     |     |     |     |     |     |     |     |     |     |     |     |     |     |     |     |     |     |     |     |     |     |     |     |     |     |     |     |     |     |     |     |     |     |     |     |     |     |     |     |     |     |     |     |     |     |     |     |     |     |     |     |     |     |     |     |     |     |     |     |     |     |     |     |     |     |     |     |     |     |     |     |     |     |     |     |     |     |     |     |     |     |     |     |     |     |     |     |     |     |     |     |     |     |     |     |     |     |     |     |     |     |     |     |     |     |     |     |     |     |     |     |     |     |     |     |     |     |     |     |     |     |     |     |     |     |     |     |     |     |     |     |     |     |     |     |     |     |     |     |     |     |     |     |     |     |     |     |     |     |     |     |     |     |     |     |     |     |     |     |     |     |     |     |     |     |     |     |     |     |     |     |     |     |     |     |     |     |     |     |     |     |     |     |     |     |     |     |     |     |     |     |     |     |     |     |     |     |     |     |     |     |     |     |     |     |     |     |     |     |     |     |     |     |     |     |     |     |     |     |     |     |     |     |     |     |     |     |     |     |     |     |     |     |     |     |     |     |     |     |     |     |     |     |     |     |     |     |     |     |     |     |     |     |     |     |     |     |     |     |     |     |     |     |     |     |     |     |     |     |     |     |     |     |     |     |     |     |     |     |     |     |     |     |     |     |     |     |
| T4 NC                  | 000866.4 | (103076) | TATT   | CC     | TGA    | AGCA   | CAGGG  | T      | CGCTT  | TGACG  | AAT    | TGCT         | TCTG  | CTTT | AA    | TAA  | AGA  | CGA | -TA   | TAA   | ATA    | CA  | ATT   | GT   | CG     | AG   | AAT | AT  | GCT | T   | -GATG | AT  | GAA  |      |      |       |     |     |     |     |     |     |      |     |     |     |     |     |     |     |     |     |     |     |     |     |     |     |     |     |     |     |     |     |     |     |     |     |     |     |     |     |     |     |     |     |     |     |     |     |     |     |     |     |     |     |     |     |     |     |     |     |     |     |     |     |     |     |     |     |     |     |     |     |     |     |     |     |     |     |     |     |     |     |     |     |     |     |     |     |     |     |     |     |     |     |     |     |     |     |     |     |     |     |     |     |     |     |     |     |     |     |     |     |     |     |     |     |     |     |     |     |     |     |     |     |     |     |     |     |     |     |     |     |     |     |     |     |     |     |     |     |     |     |     |     |     |     |     |     |     |     |     |     |     |     |     |     |     |     |     |     |     |     |     |     |     |     |     |     |     |     |     |     |     |     |     |     |     |     |     |     |     |     |     |     |     |     |     |     |     |     |     |     |     |     |     |     |     |     |     |     |     |     |     |     |     |     |     |     |     |     |     |     |     |     |     |     |     |     |     |     |     |     |     |     |     |     |     |     |     |     |     |     |     |     |     |     |     |     |     |     |     |     |     |     |     |     |     |     |     |     |     |     |     |     |     |     |     |     |     |     |     |     |     |     |     |     |     |     |     |     |     |     |     |     |     |     |     |     |     |     |     |     |     |     |     |     |     |     |     |     |     |     |     |     |     |     |     |     |     |     |     |     |     |     |     |     |     |     |     |     |     |     |     |     |     |     |     |     |     |     |     |     |     |     |     |     |     |     |     |     |     |     |     |     |     |     |     |     |     |     |     |     |     |     |     |     |     |     |     |     |     |     |     |     |     |     |     |     |     |     |     |     |     |     |     |     |     |     |     |     |     |     |     |     |     |     |     |     |     |     |     |     |     |     |     |     |     |     |     |     |     |     |     |     |     |     |     |     |     |     |     |     |     |     |     |     |     |     |     |     |     |     |     |     |     |     |     |     |     |     |     |     |     |     |     |     |     |     |     |     |     |     |     |     |     |     |     |     |     |     |     |     |     |     |     |     |     |     |     |     |     |     |     |     |     |     |     |     |     |     |     |     |     |     |     |     |     |     |     |     |     |     |     |
| SARS-CoV-2 NC_045512.2 | (19810)  | AAA      | -CC    | AG     | TAC    | CA     | GAGG   | -      | TGAAAA | TACTC  | AAT    | AA           | TT    | TGGG | TG    | TGG  | AC   | AT  | TG    | CTG   | CTA    | ATA | CT    | GT   | GA     | TA   | CT  | GG  | G   | ACT | AC    | AAA | AG   | GAG  | T    | GCTCC | AG  | CA  | C   |     |     |     |      |     |     |     |     |     |     |     |     |     |     |     |     |     |     |     |     |     |     |     |     |     |     |     |     |     |     |     |     |     |     |     |     |     |     |     |     |     |     |     |     |     |     |     |     |     |     |     |     |     |     |     |     |     |     |     |     |     |     |     |     |     |     |     |     |     |     |     |     |     |     |     |     |     |     |     |     |     |     |     |     |     |     |     |     |     |     |     |     |     |     |     |     |     |     |     |     |     |     |     |     |     |     |     |     |     |     |     |     |     |     |     |     |     |     |     |     |     |     |     |     |     |     |     |     |     |     |     |     |     |     |     |     |     |     |     |     |     |     |     |     |     |     |     |     |     |     |     |     |     |     |     |     |     |     |     |     |     |     |     |     |     |     |     |     |     |     |     |     |     |     |     |     |     |     |     |     |     |     |     |     |     |     |     |     |     |     |     |     |     |     |     |     |     |     |     |     |     |     |     |     |     |     |     |     |     |     |     |     |     |     |     |     |     |     |     |     |     |     |     |     |     |     |     |     |     |     |     |     |     |     |     |     |     |     |     |     |     |     |     |     |     |     |     |     |     |     |     |     |     |     |     |     |     |     |     |     |     |     |     |     |     |     |     |     |     |     |     |     |     |     |     |     |     |     |     |     |     |     |     |     |     |     |     |     |     |     |     |     |     |     |     |     |     |     |     |     |     |     |     |     |     |     |     |     |     |     |     |     |     |     |     |     |     |     |     |     |     |     |     |     |     |     |     |     |     |     |     |     |     |     |     |     |     |     |     |     |     |     |     |     |     |     |     |     |     |     |     |     |     |     |     |     |     |     |     |     |     |     |     |     |     |     |     |     |     |     |     |     |     |     |     |     |     |     |     |     |     |     |     |     |     |     |     |     |     |     |     |     |     |     |     |     |     |     |     |     |     |     |     |     |     |     |     |     |     |     |     |     |     |     |     |     |     |     |     |     |     |     |     |     |     |     |     |     |     |     |     |     |     |     |     |     |     |     |     |     |     |     |     |     |     |     |     |     |     |     |     |     |     |     |     |     |     |     |     |     |     |     |     |     |     |     |
|                        |          |          |        |        |        |        |        |        |        |        |        | Section 1081 |       |      |       |      |      |     |       |       |        |     |       |      |        |      |     |     |     |     |       |     |      |      |      |       |     |     |     |     |     |     |      |     |     |     |     |     |     |     |     |     |     |     |     |     |     |     |     |     |     |     |     |     |     |     |     |     |     |     |     |     |     |     |     |     |     |     |     |     |     |     |     |     |     |     |     |     |     |     |     |     |     |     |     |     |     |     |     |     |     |     |     |     |     |     |     |     |     |     |     |     |     |     |     |     |     |     |     |     |     |     |     |     |     |     |     |     |     |     |     |     |     |     |     |     |     |     |     |     |     |     |     |     |     |     |     |     |     |     |     |     |     |     |     |     |     |     |     |     |     |     |     |     |     |     |     |     |     |     |     |     |     |     |     |     |     |     |     |     |     |     |     |     |     |     |     |     |     |     |     |     |     |     |     |     |     |     |     |     |     |     |     |     |     |     |     |     |     |     |     |     |     |     |     |     |     |     |     |     |     |     |     |     |     |     |     |     |     |     |     |     |     |     |     |     |     |     |     |     |     |     |     |     |     |     |     |     |     |     |     |     |     |     |     |     |     |     |     |     |     |     |     |     |     |     |     |     |     |     |     |     |     |     |     |     |     |     |     |     |     |     |     |     |     |     |     |     |     |     |     |     |     |     |     |     |     |     |     |     |     |     |     |     |     |     |     |     |     |     |     |     |     |     |     |     |     |     |     |     |     |     |     |     |     |     |     |     |     |     |     |     |     |     |     |     |     |     |     |     |     |     |     |     |     |     |     |     |     |     |     |     |     |     |     |     |     |     |     |     |     |     |     |     |     |     |     |     |     |     |     |     |     |     |     |     |     |     |     |     |     |     |     |     |     |     |     |     |     |     |     |     |     |     |     |     |     |     |     |     |     |     |     |     |     |     |     |     |     |     |     |     |     |     |     |     |     |     |     |     |     |     |     |     |     |     |     |     |     |     |     |     |     |     |     |     |     |     |     |     |     |     |     |     |     |     |     |     |     |     |     |     |     |     |     |     |     |     |     |     |     |     |     |     |     |     |     |     |     |     |     |     |     |     |     |     |     |     |     |     |     |     |     |     |     |     |     |     |     |     |     |     |     |     |     |     |     |     |     |     |     |     |     |     |     |
|                        | (103681) | 103681   | 103686 | 103697 | 103708 | 103719 | 103730 | 103741 | 103752 | 103763 | 103776 |              |       |      |       |      |      |     |       |       |        |     |       |      |        |      |     |     |     |     |       |     |      |      |      |       |     |     |     |     |     |     |      |     |     |     |     |     |     |     |     |     |     |     |     |     |     |     |     |     |     |     |     |     |     |     |     |     |     |     |     |     |     |     |     |     |     |     |     |     |     |     |     |     |     |     |     |     |     |     |     |     |     |     |     |     |     |     |     |     |     |     |     |     |     |     |     |     |     |     |     |     |     |     |     |     |     |     |     |     |     |     |     |     |     |     |     |     |     |     |     |     |     |     |     |     |     |     |     |     |     |     |     |     |     |     |     |     |     |     |     |     |     |     |     |     |     |     |     |     |     |     |     |     |     |     |     |     |     |     |     |     |     |     |     |     |     |     |     |     |     |     |     |     |     |     |     |     |     |     |     |     |     |     |     |     |     |     |     |     |     |     |     |     |     |     |     |     |     |     |     |     |     |     |     |     |     |     |     |     |     |     |     |     |     |     |     |     |     |     |     |     |     |     |     |     |     |     |     |     |     |     |     |     |     |     |     |     |     |     |     |     |     |     |     |     |     |     |     |     |     |     |     |     |     |     |     |     |     |     |     |     |     |     |     |     |     |     |     |     |     |     |     |     |     |     |     |     |     |     |     |     |     |     |     |     |     |     |     |     |     |     |     |     |     |     |     |     |     |     |     |     |     |     |     |     |     |     |     |     |     |     |     |     |     |     |     |     |     |     |     |     |     |     |     |     |     |     |     |     |     |     |     |     |     |     |     |     |     |     |     |     |     |     |     |     |     |     |     |     |     |     |     |     |     |     |     |     |     |     |     |     |     |     |     |     |     |     |     |     |     |     |     |     |     |     |     |     |     |     |     |     |     |     |     |     |     |     |     |     |     |     |     |     |     |     |     |     |     |     |     |     |     |     |     |     |     |     |     |     |     |     |     |     |     |     |     |     |     |     |     |     |     |     |     |     |     |     |     |     |     |     |     |     |     |     |     |     |     |     |     |     |     |     |     |     |     |     |     |     |     |     |     |     |     |     |     |     |     |     |     |     |     |     |     |     |     |     |     |     |     |     |     |     |     |     |     |     |     |     |     |     |     |     |     |     |     |     |     |     |     |     |     |     |     |
| T4 NC                  | 000866.4 | (103170) | ACT    | GAT    | TTA    | G      | GG     | TTG    | CAT    | TAGC   | TTCT   | TAT          | TAA   | TGAA | AAT   | AT   | GCC  | GTT | AAA   | TG    | AA     | T   | T     | C    | ---    | ATCG | TT  | AAA | CA  | T   | GTT   | TC  | TG   | CCCG | T    | GG    | TG  | AA  | AT  | T   | ACT | T   |      |     |     |     |     |     |     |     |     |     |     |     |     |     |     |     |     |     |     |     |     |     |     |     |     |     |     |     |     |     |     |     |     |     |     |     |     |     |     |     |     |     |     |     |     |     |     |     |     |     |     |     |     |     |     |     |     |     |     |     |     |     |     |     |     |     |     |     |     |     |     |     |     |     |     |     |     |     |     |     |     |     |     |     |     |     |     |     |     |     |     |     |     |     |     |     |     |     |     |     |     |     |     |     |     |     |     |     |     |     |     |     |     |     |     |     |     |     |     |     |     |     |     |     |     |     |     |     |     |     |     |     |     |     |     |     |     |     |     |     |     |     |     |     |     |     |     |     |     |     |     |     |     |     |     |     |     |     |     |     |     |     |     |     |     |     |     |     |     |     |     |     |     |     |     |     |     |     |     |     |     |     |     |     |     |     |     |     |     |     |     |     |     |     |     |     |     |     |     |     |     |     |     |     |     |     |     |     |     |     |     |     |     |     |     |     |     |     |     |     |     |     |     |     |     |     |     |     |     |     |     |     |     |     |     |     |     |     |     |     |     |     |     |     |     |     |     |     |     |     |     |     |     |     |     |     |     |     |     |     |     |     |     |     |     |     |     |     |     |     |     |     |     |     |     |     |     |     |     |     |     |     |     |     |     |     |     |     |     |     |     |     |     |     |     |     |     |     |     |     |     |     |     |     |     |     |     |     |     |     |     |     |     |     |     |     |     |     |     |     |     |     |     |     |     |     |     |     |     |     |     |     |     |     |     |     |     |     |     |     |     |     |     |     |     |     |     |     |     |     |     |     |     |     |     |     |     |     |     |     |     |     |     |     |     |     |     |     |     |     |     |     |     |     |     |     |     |     |     |     |     |     |     |     |     |     |     |     |     |     |     |     |     |     |     |     |     |     |     |     |     |     |     |     |     |     |     |     |     |     |     |     |     |     |     |     |     |     |     |     |     |     |     |     |     |     |     |     |     |     |     |     |     |     |     |     |     |     |     |     |     |     |     |     |     |     |     |     |     |     |     |     |     |     |     |     |     |     |     |     |     |     |     |
| SARS-CoV-2 NC_045512.2 | (19904)  | ATAT     | AT     | C      | TA     | -CT    | ATTG   | GT     | GT     | TTT    | TTCT   | TAT          | G     | AC   | TG    | AC   | T    | -   | AGCC  | AAG   | AAA    | CC  | AA    | C    | T      | G    | AA  | AC  | GAT | TT  | GT    | GA  | CC   | AC   | TC   | ACT   | GT  | CT  | TTT | TT  | TG  | AT  | -GGT |     |     |     |     |     |     |     |     |     |     |     |     |     |     |     |     |     |     |     |     |     |     |     |     |     |     |     |     |     |     |     |     |     |     |     |     |     |     |     |     |     |     |     |     |     |     |     |     |     |     |     |     |     |     |     |     |     |     |     |     |     |     |     |     |     |     |     |     |     |     |     |     |     |     |     |     |     |     |     |     |     |     |     |     |     |     |     |     |     |     |     |     |     |     |     |     |     |     |     |     |     |     |     |     |     |     |     |     |     |     |     |     |     |     |     |     |     |     |     |     |     |     |     |     |     |     |     |     |     |     |     |     |     |     |     |     |     |     |     |     |     |     |     |     |     |     |     |     |     |     |     |     |     |     |     |     |     |     |     |     |     |     |     |     |     |     |     |     |     |     |     |     |     |     |     |     |     |     |     |     |     |     |     |     |     |     |     |     |     |     |     |     |     |     |     |     |     |     |     |     |     |     |     |     |     |     |     |     |     |     |     |     |     |     |     |     |     |     |     |     |     |     |     |     |     |     |     |     |     |     |     |     |     |     |     |     |     |     |     |     |     |     |     |     |     |     |     |     |     |     |     |     |     |     |     |     |     |     |     |     |     |     |     |     |     |     |     |     |     |     |     |     |     |     |     |     |     |     |     |     |     |     |     |     |     |     |     |     |     |     |     |     |     |     |     |     |     |     |     |     |     |     |     |     |     |     |     |     |     |     |     |     |     |     |     |     |     |     |     |     |     |     |     |     |     |     |     |     |     |     |     |     |     |     |     |     |     |     |     |     |     |     |     |     |     |     |     |     |     |     |     |     |     |     |     |     |     |     |     |     |     |     |     |     |     |     |     |     |     |     |     |     |     |     |     |     |     |     |     |     |     |     |     |     |     |     |     |     |     |     |     |     |     |     |     |     |     |     |     |     |     |     |     |     |     |     |     |     |     |     |     |     |     |     |     |     |     |     |     |     |     |     |     |     |     |     |     |     |     |     |     |     |     |     |     |     |     |     |     |     |     |     |     |     |     |     |     |     |     |     |     |     |     |     |     |     |     |     |     |     |     |     |
|                        |          |          |        |        |        |        |        |        |        |        |        | Section 1082 |       |      |       |      |      |     |       |       |        |     |       |      |        |      |     |     |     |     |       |     |      |      |      |       |     |     |     |     |     |     |      |     |     |     |     |     |     |     |     |     |     |     |     |     |     |     |     |     |     |     |     |     |     |     |     |     |     |     |     |     |     |     |     |     |     |     |     |     |     |     |     |     |     |     |     |     |     |     |     |     |     |     |     |     |     |     |     |     |     |     |     |     |     |     |     |     |     |     |     |     |     |     |     |     |     |     |     |     |     |     |     |     |     |     |     |     |     |     |     |     |     |     |     |     |     |     |     |     |     |     |     |     |     |     |     |     |     |     |     |     |     |     |     |     |     |     |     |     |     |     |     |     |     |     |     |     |     |     |     |     |     |     |     |     |     |     |     |     |     |     |     |     |     |     |     |     |     |     |     |     |     |     |     |     |     |     |     |     |     |     |     |     |     |     |     |     |     |     |     |     |     |     |     |     |     |     |     |     |     |     |     |     |     |     |     |     |     |     |     |     |     |     |     |     |     |     |     |     |     |     |     |     |     |     |     |     |     |     |     |     |     |     |     |     |     |     |     |     |     |     |     |     |     |     |     |     |     |     |     |     |     |     |     |     |     |     |     |     |     |     |     |     |     |     |     |     |     |     |     |     |     |     |     |     |     |     |     |     |     |     |     |     |     |     |     |     |     |     |     |     |     |     |     |     |     |     |     |     |     |     |     |     |     |     |     |     |     |     |     |     |     |     |     |     |     |     |     |     |     |     |     |     |     |     |     |     |     |     |     |     |     |     |     |     |     |     |     |     |     |     |     |     |     |     |     |     |     |     |     |     |     |     |     |     |     |     |     |     |     |     |     |     |     |     |     |     |     |     |     |     |     |     |     |     |     |     |     |     |     |     |     |     |     |     |     |     |     |     |     |     |     |     |     |     |     |     |     |     |     |     |     |     |     |     |     |     |     |     |     |     |     |     |     |     |     |     |     |     |     |     |     |     |     |     |     |     |     |     |     |     |     |     |     |     |     |     |     |     |     |     |     |     |     |     |     |     |     |     |     |     |     |     |     |     |     |     |     |     |     |     |     |     |     |     |     |     |     |     |     |     |     |     |     |     |     |     |     |     |     |     |     |     |     |
|                        | (103777) | 103777   | 103785 | 103796 | 103807 | 103818 | 103829 | 103840 | 103851 | 103872 |        |              |       |      |       |      |      |     |       |       |        |     |       |      |        |      |     |     |     |     |       |     |      |      |      |       |     |     |     |     |     |     |      |     |     |     |     |     |     |     |     |     |     |     |     |     |     |     |     |     |     |     |     |     |     |     |     |     |     |     |     |     |     |     |     |     |     |     |     |     |     |     |     |     |     |     |     |     |     |     |     |     |     |     |     |     |     |     |     |     |     |     |     |     |     |     |     |     |     |     |     |     |     |     |     |     |     |     |     |     |     |     |     |     |     |     |     |     |     |     |     |     |     |     |     |     |     |     |     |     |     |     |     |     |     |     |     |     |     |     |     |     |     |     |     |     |     |     |     |     |     |     |     |     |     |     |     |     |     |     |     |     |     |     |     |     |     |     |     |     |     |     |     |     |     |     |     |     |     |     |     |     |     |     |     |     |     |     |     |     |     |     |     |     |     |     |     |     |     |     |     |     |     |     |     |     |     |     |     |     |     |     |     |     |     |     |     |     |     |     |     |     |     |     |     |     |     |     |     |     |     |     |     |     |     |     |     |     |     |     |     |     |     |     |     |     |     |     |     |     |     |     |     |     |     |     |     |     |     |     |     |     |     |     |     |     |     |     |     |     |     |     |     |     |     |     |     |     |     |     |     |     |     |     |     |     |     |     |     |     |     |     |     |     |     |     |     |     |     |     |     |     |     |     |     |     |     |     |     |     |     |     |     |     |     |     |     |     |     |     |     |     |     |     |     |     |     |     |     |     |     |     |     |     |     |     |     |     |     |     |     |     |     |     |     |     |     |     |     |     |     |     |     |     |     |     |     |     |     |     |     |     |     |     |     |     |     |     |     |     |     |     |     |     |     |     |     |     |     |     |     |     |     |     |     |     |     |     |     |     |     |     |     |     |     |     |     |     |     |     |     |     |     |     |     |     |     |     |     |     |     |     |     |     |     |     |     |     |     |     |     |     |     |     |     |     |     |     |     |     |     |     |     |     |     |     |     |     |     |     |     |     |     |     |     |     |     |     |     |     |     |     |     |     |     |     |     |     |     |     |     |     |     |     |     |     |     |     |     |     |     |     |     |     |     |     |     |     |     |     |     |     |     |     |     |     |     |     |     |     |     |     |     |     |     |
| T4 NC                  | 000866.4 | (103263) | CG     | CACT   | TAA    | AG     | AC     | C      | --     | GCAA   | AC     | GC           | ----- | G    | TG    | AA   | CG   | AA  | TG    | CAT   | TT     | C   | AA    | ACC  | AC     | TG   | GG  | CT  | GT  | CT  | TAA   | AG  | CA   | AAA  | C    | GT    | AG  | AC  | AA  | ATT | GT  | CT  | CG   | TAA | A   |     |     |     |     |     |     |     |     |     |     |     |     |     |     |     |     |     |     |     |     |     |     |     |     |     |     |     |     |     |     |     |     |     |     |     |     |     |     |     |     |     |     |     |     |     |     |     |     |     |     |     |     |     |     |     |     |     |     |     |     |     |     |     |     |     |     |     |     |     |     |     |     |     |     |     |     |     |     |     |     |     |     |     |     |     |     |     |     |     |     |     |     |     |     |     |     |     |     |     |     |     |     |     |     |     |     |     |     |     |     |     |     |     |     |     |     |     |     |     |     |     |     |     |     |     |     |     |     |     |     |     |     |     |     |     |     |     |     |     |     |     |     |     |     |     |     |     |     |     |     |     |     |     |     |     |     |     |     |     |     |     |     |     |     |     |     |     |     |     |     |     |     |     |     |     |     |     |     |     |     |     |     |     |     |     |     |     |     |     |     |     |     |     |     |     |     |     |     |     |     |     |     |     |     |     |     |     |     |     |     |     |     |     |     |     |     |     |     |     |     |     |     |     |     |     |     |     |     |     |     |     |     |     |     |     |     |     |     |     |     |     |     |     |     |     |     |     |     |     |     |     |     |     |     |     |     |     |     |     |     |     |     |     |     |     |     |     |     |     |     |     |     |     |     |     |     |     |     |     |     |     |     |     |     |     |     |     |     |     |     |     |     |     |     |     |     |     |     |     |     |     |     |     |     |     |     |     |     |     |     |     |     |     |     |     |     |     |     |     |     |     |     |     |     |     |     |     |     |     |     |     |     |     |     |     |     |     |     |     |     |     |     |     |     |     |     |     |     |     |     |     |     |     |     |     |     |     |     |     |     |     |     |     |     |     |     |     |     |     |     |     |     |     |     |     |     |     |     |     |     |     |     |     |     |     |     |     |     |     |     |     |     |     |     |     |     |     |     |     |     |     |     |     |     |     |     |     |     |     |     |     |     |     |     |     |     |     |     |     |     |     |     |     |     |     |     |     |     |     |     |     |     |     |     |     |     |     |     |     |     |     |     |     |     |     |     |     |     |     |     |     |     |     |     |     |     |     |     |     |     |
| SARS-CoV-2 NC_045512.2 | (19996)  | AG       | AGT    | TG     | AT     | GGT    | CA     | AG     | TAG    | ACT    | TAT    | TTT          | TAG   | AAA  | TG    | CC   | CG   | T   | AA    | TG    | GT     | TT  | C     | TT   | ATT    | AC   | AG  | A   | --- | AGG | TAG   | T   | GT   | TT   | AA   | AG    | GT  | TT  | AC  | AA  | --- | C   | CAT  | C   | TG  | TAA | A   |     |     |     |     |     |     |     |     |     |     |     |     |     |     |     |     |     |     |     |     |     |     |     |     |     |     |     |     |     |     |     |     |     |     |     |     |     |     |     |     |     |     |     |     |     |     |     |     |     |     |     |     |     |     |     |     |     |     |     |     |     |     |     |     |     |     |     |     |     |     |     |     |     |     |     |     |     |     |     |     |     |     |     |     |     |     |     |     |     |     |     |     |     |     |     |     |     |     |     |     |     |     |     |     |     |     |     |     |     |     |     |     |     |     |     |     |     |     |     |     |     |     |     |     |     |     |     |     |     |     |     |     |     |     |     |     |     |     |     |     |     |     |     |     |     |     |     |     |     |     |     |     |     |     |     |     |     |     |     |     |     |     |     |     |     |     |     |     |     |     |     |     |     |     |     |     |     |     |     |     |     |     |     |     |     |     |     |     |     |     |     |     |     |     |     |     |     |     |     |     |     |     |     |     |     |     |     |     |     |     |     |     |     |     |     |     |     |     |     |     |     |     |     |     |     |     |     |     |     |     |     |     |     |     |     |     |     |     |     |     |     |     |     |     |     |     |     |     |     |     |     |     |     |     |     |     |     |     |     |     |     |     |     |     |     |     |     |     |     |     |     |     |     |     |     |     |     |     |     |     |     |     |     |     |     |     |     |     |     |     |     |     |     |     |     |     |     |     |     |     |     |     |     |     |     |     |     |     |     |     |     |     |     |     |     |     |     |     |     |     |     |     |     |     |     |     |     |     |     |     |     |     |     |     |     |     |     |     |     |     |     |     |     |     |     |     |     |     |     |     |     |     |     |     |     |     |     |     |     |     |     |     |     |     |     |     |     |     |     |     |     |     |     |     |     |     |     |     |     |     |     |     |     |     |     |     |     |     |     |     |     |     |     |     |     |     |     |     |     |     |     |     |     |     |     |     |     |     |     |     |     |     |     |     |     |     |     |     |     |     |     |     |     |     |     |     |     |     |     |     |     |     |     |     |     |     |     |     |     |     |     |     |     |     |     |     |     |     |     |     |     |     |     |     |     |     |     |     |
|                        |          |          |        |        |        |        |        |        |        |        |        | Section 1083 |       |      |       |      |      |     |       |       |        |     |       |      |        |      |     |     |     |     |       |     |      |      |      |       |     |     |     |     |     |     |      |     |     |     |     |     |     |     |     |     |     |     |     |     |     |     |     |     |     |     |     |     |     |     |     |     |     |     |     |     |     |     |     |     |     |     |     |     |     |     |     |     |     |     |     |     |     |     |     |     |     |     |     |     |     |     |     |     |     |     |     |     |     |     |     |     |     |     |     |     |     |     |     |     |     |     |     |     |     |     |     |     |     |     |     |     |     |     |     |     |     |     |     |     |     |     |     |     |     |     |     |     |     |     |     |     |     |     |     |     |     |     |     |     |     |     |     |     |     |     |     |     |     |     |     |     |     |     |     |     |     |     |     |     |     |     |     |     |     |     |     |     |     |     |     |     |     |     |     |     |     |     |     |     |     |     |     |     |     |     |     |     |     |     |     |     |     |     |     |     |     |     |     |     |     |     |     |     |     |     |     |     |     |     |     |     |     |     |     |     |     |     |     |     |     |     |     |     |     |     |     |     |     |     |     |     |     |     |     |     |     |     |     |     |     |     |     |     |     |     |     |     |     |     |     |     |     |     |     |     |     |     |     |     |     |     |     |     |     |     |     |     |     |     |     |     |     |     |     |     |     |     |     |     |     |     |     |     |     |     |     |     |     |     |     |     |     |     |     |     |     |     |     |     |     |     |     |     |     |     |     |     |     |     |     |     |     |     |     |     |     |     |     |     |     |     |     |     |     |     |     |     |     |     |     |     |     |     |     |     |     |     |     |     |     |     |     |     |     |     |     |     |     |     |     |     |     |     |     |     |     |     |     |     |     |     |     |     |     |     |     |     |     |     |     |     |     |     |     |     |     |     |     |     |     |     |     |     |     |     |     |     |     |     |     |     |     |     |     |     |     |     |     |     |     |     |     |     |     |     |     |     |     |     |     |     |     |     |     |     |     |     |     |     |     |     |     |     |     |     |     |     |     |     |     |     |     |     |     |     |     |     |     |     |     |     |     |     |     |     |     |     |     |     |     |     |     |     |     |     |     |     |     |     |     |     |     |     |     |     |     |     |     |     |     |     |     |     |     |     |     |     |     |     |     |     |     |     |     |     |     |     |     |
|                        | (103873) | 103873   | 103884 | 103895 | 103906 | 103917 | 103928 | 103939 | 103950 | 103968 |        |              |       |      |       |      |      |     |       |       |        |     |       |      |        |      |     |     |     |     |       |     |      |      |      |       |     |     |     |     |     |     |      |     |     |     |     |     |     |     |     |     |     |     |     |     |     |     |     |     |     |     |     |     |     |     |     |     |     |     |     |     |     |     |     |     |     |     |     |     |     |     |     |     |     |     |     |     |     |     |     |     |     |     |     |     |     |     |     |     |     |     |     |     |     |     |     |     |     |     |     |     |     |     |     |     |     |     |     |     |     |     |     |     |     |     |     |     |     |     |     |     |     |     |     |     |     |     |     |     |     |     |     |     |     |     |     |     |     |     |     |     |     |     |     |     |     |     |     |     |     |     |     |     |     |     |     |     |     |     |     |     |     |     |     |     |     |     |     |     |     |     |     |     |     |     |     |     |     |     |     |     |     |     |     |     |     |     |     |     |     |     |     |     |     |     |     |     |     |     |     |     |     |     |     |     |     |     |     |     |     |     |     |     |     |     |     |     |     |     |     |     |     |     |     |     |     |     |     |     |     |     |     |     |     |     |     |     |     |     |     |     |     |     |     |     |     |     |     |     |     |     |     |     |     |     |     |     |     |     |     |     |     |     |     |     |     |     |     |     |     |     |     |     |     |     |     |     |     |     |     |     |     |     |     |     |     |     |     |     |     |     |     |     |     |     |     |     |     |     |     |     |     |     |     |     |     |     |     |     |     |     |     |     |     |     |     |     |     |     |     |     |     |     |     |     |     |     |     |     |     |     |     |     |     |     |     |     |     |     |     |     |     |     |     |     |     |     |     |     |     |     |     |     |     |     |     |     |     |     |     |     |     |     |     |     |     |     |     |     |     |     |     |     |     |     |     |     |     |     |     |     |     |     |     |     |     |     |     |     |     |     |     |     |     |     |     |     |     |     |     |     |     |     |     |     |     |     |     |     |     |     |     |     |     |     |     |     |     |     |     |     |     |     |     |     |     |     |     |     |     |     |     |     |     |     |     |     |     |     |     |     |     |     |     |     |     |     |     |     |     |     |     |     |     |     |     |     |     |     |     |     |     |     |     |     |     |     |     |     |     |     |     |     |     |     |     |     |     |     |     |     |     |     |     |     |     |     |     |     |     |     |     |     |     |
| T4 NC                  | 000866.4 | (103350) | GCT    | A      | CC     | AAAA   | AC     | G      | -AAG   | ATT    | GC     | CA           | AT    | CC   | AG    | C    | AGG  | T   | CA    | T     | C      | T   | CG    | T    | GC     | -    | T   | CA  | GC  | GT  | A     | AG  | CG   | T    | AAAA | AA    | AG  | CT  | CT  | T   | T   | AA  | CG   | CC  | GT  | AA  | -GC | AT  | TAG | GAT | TAA |     |     |     |     |     |     |     |     |     |     |     |     |     |     |     |     |     |     |     |     |     |     |     |     |     |     |     |     |     |     |     |     |     |     |     |     |     |     |     |     |     |     |     |     |     |     |     |     |     |     |     |     |     |     |     |     |     |     |     |     |     |     |     |     |     |     |     |     |     |     |     |     |     |     |     |     |     |     |     |     |     |     |     |     |     |     |     |     |     |     |     |     |     |     |     |     |     |     |     |     |     |     |     |     |     |     |     |     |     |     |     |     |     |     |     |     |     |     |     |     |     |     |     |     |     |     |     |     |     |     |     |     |     |     |     |     |     |     |     |     |     |     |     |     |     |     |     |     |     |     |     |     |     |     |     |     |     |     |     |     |     |     |     |     |     |     |     |     |     |     |     |     |     |     |     |     |     |     |     |     |     |     |     |     |     |     |     |     |     |     |     |     |     |     |     |     |     |     |     |     |     |     |     |     |     |     |     |     |     |     |     |     |     |     |     |     |     |     |     |     |     |     |     |     |     |     |     |     |     |     |     |     |     |     |     |     |     |     |     |     |     |     |     |     |     |     |     |     |     |     |     |     |     |     |     |     |     |     |     |     |     |     |     |     |     |     |     |     |     |     |     |     |     |     |     |     |     |     |     |     |     |     |     |     |     |     |     |     |     |     |     |     |     |     |     |     |     |     |     |     |     |     |     |     |     |     |     |     |     |     |     |     |     |     |     |     |     |     |     |     |     |     |     |     |     |     |     |     |     |     |     |     |     |     |     |     |     |     |     |     |     |     |     |     |     |     |     |     |     |     |     |     |     |     |     |     |     |     |     |     |     |     |     |     |     |     |     |     |     |     |     |     |     |     |     |     |     |     |     |     |     |     |     |     |     |     |     |     |     |     |     |     |     |     |     |     |     |     |     |     |     |     |     |     |     |     |     |     |     |     |     |     |     |     |     |     |     |     |     |     |     |     |     |     |     |     |     |     |     |     |     |     |     |     |     |     |     |     |     |     |     |     |     |     |     |     |     |     |     |     |     |     |     |     |
| SARS-CoV-2 NC_045512.2 | (20086)  | GG       | T      | C      | CC     | AAAA   | ---    | C      | AAG    | CT     | AG     | T            | C     | TT   | ---   | ---  | A    | AT  | GG    | AG    | T      | C   | A     | T    | TAA    | TT   | GG  | AG  | A   | GC  | CG    | T   | AAAA | AA   | CA   | AG    | TT  | C   | AA  | TT  | ATT | AT  | TAA  | AA  | GAA | AG  | T   | T   | GAT | GG  |     |     |     |     |     |     |     |     |     |     |     |     |     |     |     |     |     |     |     |     |     |     |     |     |     |     |     |     |     |     |     |     |     |     |     |     |     |     |     |     |     |     |     |     |     |     |     |     |     |     |     |     |     |     |     |     |     |     |     |     |     |     |     |     |     |     |     |     |     |     |     |     |     |     |     |     |     |     |     |     |     |     |     |     |     |     |     |     |     |     |     |     |     |     |     |     |     |     |     |     |     |     |     |     |     |     |     |     |     |     |     |     |     |     |     |     |     |     |     |     |     |     |     |     |     |     |     |     |     |     |     |     |     |     |     |     |     |     |     |     |     |     |     |     |     |     |     |     |     |     |     |     |     |     |     |     |     |     |     |     |     |     |     |     |     |     |     |     |     |     |     |     |     |     |     |     |     |     |     |     |     |     |     |     |     |     |     |     |     |     |     |     |     |     |     |     |     |     |     |     |     |     |     |     |     |     |     |     |     |     |     |     |     |     |     |     |     |     |     |     |     |     |     |     |     |     |     |     |     |     |     |     |     |     |     |     |     |     |     |     |     |     |     |     |     |     |     |     |     |     |     |     |     |     |     |     |     |     |     |     |     |     |     |     |     |     |     |     |     |     |     |     |     |     |     |     |     |     |     |     |     |     |     |     |     |     |     |     |     |     |     |     |     |     |     |     |     |     |     |     |     |     |     |     |     |     |     |     |     |     |     |     |     |     |     |     |     |     |     |     |     |     |     |     |     |     |     |     |     |     |     |     |     |     |     |     |     |     |     |     |     |     |     |     |     |     |     |     |     |     |     |     |     |     |     |     |     |     |     |     |     |     |     |     |     |     |     |     |     |     |     |     |     |     |     |     |     |     |     |     |     |     |     |     |     |     |     |     |     |     |     |     |     |     |     |     |     |     |     |     |     |     |     |     |     |     |     |     |     |     |     |     |     |     |     |     |     |     |     |     |     |     |     |     |     |     |     |     |     |     |     |     |     |     |     |     |     |     |     |     |     |     |     |     |     |     |     |     |     |     |     |     |     |     |     |
|                        |          |          |        |        |        |        |        |        |        |        |        | Section 1084 |       |      |       |      |      |     |       |       |        |     |       |      |        |      |     |     |     |     |       |     |      |      |      |       |     |     |     |     |     |     |      |     |     |     |     |     |     |     |     |     |     |     |     |     |     |     |     |     |     |     |     |     |     |     |     |     |     |     |     |     |     |     |     |     |     |     |     |     |     |     |     |     |     |     |     |     |     |     |     |     |     |     |     |     |     |     |     |     |     |     |     |     |     |     |     |     |     |     |     |     |     |     |     |     |     |     |     |     |     |     |     |     |     |     |     |     |     |     |     |     |     |     |     |     |     |     |     |     |     |     |     |     |     |     |     |     |     |     |     |     |     |     |     |     |     |     |     |     |     |     |     |     |     |     |     |     |     |     |     |     |     |     |     |     |     |     |     |     |     |     |     |     |     |     |     |     |     |     |     |     |     |     |     |     |     |     |     |     |     |     |     |     |     |     |     |     |     |     |     |     |     |     |     |     |     |     |     |     |     |     |     |     |     |     |     |     |     |     |     |     |     |     |     |     |     |     |     |     |     |     |     |     |     |     |     |     |     |     |     |     |     |     |     |     |     |     |     |     |     |     |     |     |     |     |     |     |     |     |     |     |     |     |     |     |     |     |     |     |     |     |     |     |     |     |     |     |     |     |     |     |     |     |     |     |     |     |     |     |     |     |     |     |     |     |     |     |     |     |     |     |     |     |     |     |     |     |     |     |     |     |     |     |     |     |     |     |     |     |     |     |     |     |     |     |     |     |     |     |     |     |     |     |     |     |     |     |     |     |     |     |     |     |     |     |     |     |     |     |     |     |     |     |     |     |     |     |     |     |     |     |     |     |     |     |     |     |     |     |     |     |     |     |     |     |     |     |     |     |     |     |     |     |     |     |     |     |     |     |     |     |     |     |     |     |     |     |     |     |     |     |     |     |     |     |     |     |     |     |     |     |     |     |     |     |     |     |     |     |     |     |     |     |     |     |     |     |     |     |     |     |     |     |     |     |     |     |     |     |     |     |     |     |     |     |     |     |     |     |     |     |     |     |     |     |     |     |     |     |     |     |     |     |     |     |     |     |     |     |     |     |     |     |     |     |     |     |     |     |     |     |     |     |     |     |     |     |     |     |     |     |     |     |     |
|                        | (103969) | 103969   | 103983 | 103994 | 104005 | 104016 | 104027 | 104038 | 104049 | 104064 |        |              |       |      |       |      |      |     |       |       |        |     |       |      |        |      |     |     |     |     |       |     |      |      |      |       |     |     |     |     |     |     |      |     |     |     |     |     |     |     |     |     |     |     |     |     |     |     |     |     |     |     |     |     |     |     |     |     |     |     |     |     |     |     |     |     |     |     |     |     |     |     |     |     |     |     |     |     |     |     |     |     |     |     |     |     |     |     |     |     |     |     |     |     |     |     |     |     |     |     |     |     |     |     |     |     |     |     |     |     |     |     |     |     |     |     |     |     |     |     |     |     |     |     |     |     |     |     |     |     |     |     |     |     |     |     |     |     |     |     |     |     |     |     |     |     |     |     |     |     |     |     |     |     |     |     |     |     |     |     |     |     |     |     |     |     |     |     |     |     |     |     |     |     |     |     |     |     |     |     |     |     |     |     |     |     |     |     |     |     |     |     |     |     |     |     |     |     |     |     |     |     |     |     |     |     |     |     |     |     |     |     |     |     |     |     |     |     |     |     |     |     |     |     |     |     |     |     |     |     |     |     |     |     |     |     |     |     |     |     |     |     |     |     |     |     |     |     |     |     |     |     |     |     |     |     |     |     |     |     |     |     |     |     |     |     |     |     |     |     |     |     |     |     |     |     |     |     |     |     |     |     |     |     |     |     |     |     |     |     |     |     |     |     |     |     |     |     |     |     |     |     |     |     |     |     |     |     |     |     |     |     |     |     |     |     |     |     |     |     |     |     |     |     |     |     |     |     |     |     |     |     |     |     |     |     |     |     |     |     |     |     |     |     |     |     |     |     |     |     |     |     |     |     |     |     |     |     |     |     |     |     |     |     |     |     |     |     |     |     |     |     |     |     |     |     |     |     |     |     |     |     |     |     |     |     |     |     |     |     |     |     |     |     |     |     |     |     |     |     |     |     |     |     |     |     |     |     |     |     |     |     |     |     |     |     |     |     |     |     |     |     |     |     |     |     |     |     |     |     |     |     |     |     |     |     |     |     |     |     |     |     |     |     |     |     |     |     |     |     |     |     |     |     |     |     |     |     |     |     |     |     |     |     |     |     |     |     |     |     |     |     |     |     |     |     |     |     |     |     |     |     |     |     |     |     |     |     |     |     |     |     |     |     |     |
| T4 NC                  | 000866.4 | (103443) | AG     | CT     | TAA    | TGA    | TA     | ACC    | CC     | AATT   | ACT    | AAT          | TG    | AA   | ACTT  | GG   | GT   | CA  | ACC   | TGG   | CG     | AA  | ATT   | TAT  | TG     | AT   | GG  | CG  | T   | ACC | AAT   | G   | CT   | TG   | AA   | T     | CT  | C   | AT  | GAT | TG  | GAA | AA   | G   |     |     |     |     |     |     |     |     |     |     |     |     |     |     |     |     |     |     |     |     |     |     |     |     |     |     |     |     |     |     |     |     |     |     |     |     |     |     |     |     |     |     |     |     |     |     |     |     |     |     |     |     |     |     |     |     |     |     |     |     |     |     |     |     |     |     |     |     |     |     |     |     |     |     |     |     |     |     |     |     |     |     |     |     |     |     |     |     |     |     |     |     |     |     |     |     |     |     |     |     |     |     |     |     |     |     |     |     |     |     |     |     |     |     |     |     |     |     |     |     |     |     |     |     |     |     |     |     |     |     |     |     |     |     |     |     |     |     |     |     |     |     |     |     |     |     |     |     |     |     |     |     |     |     |     |     |     |     |     |     |     |     |     |     |     |     |     |     |     |     |     |     |     |     |     |     |     |     |     |     |     |     |     |     |     |     |     |     |     |     |     |     |     |     |     |     |     |     |     |     |     |     |     |     |     |     |     |     |     |     |     |     |     |     |     |     |     |     |     |     |     |     |     |     |     |     |     |     |     |     |     |     |     |     |     |     |     |     |     |     |     |     |     |     |     |     |     |     |     |     |     |     |     |     |     |     |     |     |     |     |     |     |     |     |     |     |     |     |     |     |     |     |     |     |     |     |     |     |     |     |     |     |     |     |     |     |     |     |     |     |     |     |     |     |     |     |     |     |     |     |     |     |     |     |     |     |     |     |     |     |     |     |     |     |     |     |     |     |     |     |     |     |     |     |     |     |     |     |     |     |     |     |     |     |     |     |     |     |     |     |     |     |     |     |     |     |     |     |     |     |     |     |     |     |     |     |     |     |     |     |     |     |     |     |     |     |     |     |     |     |     |     |     |     |     |     |     |     |     |     |     |     |     |     |     |     |     |     |     |     |     |     |     |     |     |     |     |     |     |     |     |     |     |     |     |     |     |     |     |     |     |     |     |     |     |     |     |     |     |     |     |     |     |     |     |     |     |     |     |     |     |     |     |     |     |     |     |     |     |     |     |     |     |     |     |     |     |     |     |     |     |     |     |     |     |     |     |     |     |     |     |
| SARS-CoV-2 NC_045512.2 | (20172)  | TGT      | T      | GTCC   | AA     | CAA    | TTA    | CC     | TG     | AA     | ACT    | T            | ACT   | TTT  | ACT   | CA   | G    | AG  | TAG   | AA    | AT     | T   | TA    | CA   | GA     | ATT  | T   | -A  | --- | A   | ACC   | C   | AG   | G    | AG   | T     | CA  | A   | T   | GG  | AA  | AT  | TG   | --- | ATT |     |     |     |     |     |     |     |     |     |     |     |     |     |     |     |     |     |     |     |     |     |     |     |     |     |     |     |     |     |     |     |     |     |     |     |     |     |     |     |     |     |     |     |     |     |     |     |     |     |     |     |     |     |     |     |     |     |     |     |     |     |     |     |     |     |     |     |     |     |     |     |     |     |     |     |     |     |     |     |     |     |     |     |     |     |     |     |     |     |     |     |     |     |     |     |     |     |     |     |     |     |     |     |     |     |     |     |     |     |     |     |     |     |     |     |     |     |     |     |     |     |     |     |     |     |     |     |     |     |     |     |     |     |     |     |     |     |     |     |     |     |     |     |     |     |     |     |     |     |     |     |     |     |     |     |     |     |     |     |     |     |     |     |     |     |     |     |     |     |     |     |     |     |     |     |     |     |     |     |     |     |     |     |     |     |     |     |     |     |     |     |     |     |     |     |     |     |     |     |     |     |     |     |     |     |     |     |     |     |     |     |     |     |     |     |     |     |     |     |     |     |     |     |     |     |     |     |     |     |     |     |     |     |     |     |     |     |     |     |     |     |     |     |     |     |     |     |     |     |     |     |     |     |     |     |     |     |     |     |     |     |     |     |     |     |     |     |     |     |     |     |     |     |     |     |     |     |     |     |     |     |     |     |     |     |     |     |     |     |     |     |     |     |     |     |     |     |     |     |     |     |     |     |     |     |     |     |     |     |     |     |     |     |     |     |     |     |     |     |     |     |     |     |     |     |     |     |     |     |     |     |     |     |     |     |     |     |     |     |     |     |     |     |     |     |     |     |     |     |     |     |     |     |     |     |     |     |     |     |     |     |     |     |     |     |     |     |     |     |     |     |     |     |     |     |     |     |     |     |     |     |     |     |     |     |     |     |     |     |     |     |     |     |     |     |     |     |     |     |     |     |     |     |     |     |     |     |     |     |     |     |     |     |     |     |     |     |     |     |     |     |     |     |     |     |     |     |     |     |     |     |     |     |     |     |     |     |     |     |     |     |     |     |     |     |     |     |     |     |     |     |     |     |     |     |     |     |     |     |     |
|                        |          |          |        |        |        |        |        |        |        |        |        | Section 1085 |       |      |       |      |      |     |       |       |        |     |       |      |        |      |     |     |     |     |       |     |      |      |      |       |     |     |     |     |     |     |      |     |     |     |     |     |     |     |     |     |     |     |     |     |     |     |     |     |     |     |     |     |     |     |     |     |     |     |     |     |     |     |     |     |     |     |     |     |     |     |     |     |     |     |     |     |     |     |     |     |     |     |     |     |     |     |     |     |     |     |     |     |     |     |     |     |     |     |     |     |     |     |     |     |     |     |     |     |     |     |     |     |     |     |     |     |     |     |     |     |     |     |     |     |     |     |     |     |     |     |     |     |     |     |     |     |     |     |     |     |     |     |     |     |     |     |     |     |     |     |     |     |     |     |     |     |     |     |     |     |     |     |     |     |     |     |     |     |     |     |     |     |     |     |     |     |     |     |     |     |     |     |     |     |     |     |     |     |     |     |     |     |     |     |     |     |     |     |     |     |     |     |     |     |     |     |     |     |     |     |     |     |     |     |     |     |     |     |     |     |     |     |     |     |     |     |     |     |     |     |     |     |     |     |     |     |     |     |     |     |     |     |     |     |     |     |     |     |     |     |     |     |     |     |     |     |     |     |     |     |     |     |     |     |     |     |     |     |     |     |     |     |     |     |     |     |     |     |     |     |     |     |     |     |     |     |     |     |     |     |     |     |     |     |     |     |     |     |     |     |     |     |     |     |     |     |     |     |     |     |     |     |     |     |     |     |     |     |     |     |     |     |     |     |     |     |     |     |     |     |     |     |     |     |     |     |     |     |     |     |     |     |     |     |     |     |     |     |     |     |     |     |     |     |     |     |     |     |     |     |     |     |     |     |     |     |     |     |     |     |     |     |     |     |     |     |     |     |     |     |     |     |     |     |     |     |     |     |     |     |     |     |     |     |     |     |     |     |     |     |     |     |     |     |     |     |     |     |     |     |     |     |     |     |     |     |     |     |     |     |     |     |     |     |     |     |     |     |     |     |     |     |     |     |     |     |     |     |     |     |     |     |     |     |     |     |     |     |     |     |     |     |     |     |     |     |     |     |     |     |     |     |     |     |     |     |     |     |     |     |     |     |     |     |     |     |     |     |     |     |     |     |     |     |     |     |     |     |     |     |     |     |     |
|                        | (104065) | 104065   | 104071 | 104082 | 104093 | 104104 | 104115 | 104126 | 104137 | 104148 | 104160 |              |       |      |       |      |      |     |       |       |        |     |       |      |        |      |     |     |     |     |       |     |      |      |      |       |     |     |     |     |     |     |      |     |     |     |     |     |     |     |     |     |     |     |     |     |     |     |     |     |     |     |     |     |     |     |     |     |     |     |     |     |     |     |     |     |     |     |     |     |     |     |     |     |     |     |     |     |     |     |     |     |     |     |     |     |     |     |     |     |     |     |     |     |     |     |     |     |     |     |     |     |     |     |     |     |     |     |     |     |     |     |     |     |     |     |     |     |     |     |     |     |     |     |     |     |     |     |     |     |     |     |     |     |     |     |     |     |     |     |     |     |     |     |     |     |     |     |     |     |     |     |     |     |     |     |     |     |     |     |     |     |     |     |     |     |     |     |     |     |     |     |     |     |     |     |     |     |     |     |     |     |     |     |     |     |     |     |     |     |     |     |     |     |     |     |     |     |     |     |     |     |     |     |     |     |     |     |     |     |     |     |     |     |     |     |     |     |     |     |     |     |     |     |     |     |     |     |     |     |     |     |     |     |     |     |     |     |     |     |     |     |     |     |     |     |     |     |     |     |     |     |     |     |     |     |     |     |     |     |     |     |     |     |     |     |     |     |     |     |     |     |     |     |     |     |     |     |     |     |     |     |     |     |     |     |     |     |     |     |     |     |     |     |     |     |     |     |     |     |     |     |     |     |     |     |     |     |     |     |     |     |     |     |     |     |     |     |     |     |     |     |     |     |     |     |     |     |     |     |     |     |     |     |     |     |     |     |     |     |     |     |     |     |     |     |     |     |     |     |     |     |     |     |     |     |     |     |     |     |     |     |     |     |     |     |     |     |     |     |     |     |     |     |     |     |     |     |     |     |     |     |     |     |     |     |     |     |     |     |     |     |     |     |     |     |     |     |     |     |     |     |     |     |     |     |     |     |     |     |     |     |     |     |     |     |     |     |     |     |     |     |     |     |     |     |     |     |     |     |     |     |     |     |     |     |     |     |     |     |     |     |     |     |     |     |     |     |     |     |     |     |     |     |     |     |     |     |     |     |     |     |     |     |     |     |     |     |     |     |     |     |     |     |     |     |     |     |     |     |     |     |     |     |     |     |     |     |     |     |     |     |     |     |     |
| T4 NC                  | 000866.4 | (103539) | A      | CTTAG  | GT     | TTA    | AA     | AC     | GG     | GT     | T      | TAT          | A     | CAT  | CG    | AA   | G    | AAT | ATTC  | CAT   | GC     | AAG | CGG   | AAG  | T      | CG   | T   | CA  | TAG | AA  | ATA   | AA  | CG   | T    | CTT  | TAT   | C   | CA  | AA  | CGT | A   | TAT | TAG  |     |     |     |     |     |     |     |     |     |     |     |     |     |     |     |     |     |     |     |     |     |     |     |     |     |     |     |     |     |     |     |     |     |     |     |     |     |     |     |     |     |     |     |     |     |     |     |     |     |     |     |     |     |     |     |     |     |     |     |     |     |     |     |     |     |     |     |     |     |     |     |     |     |     |     |     |     |     |     |     |     |     |     |     |     |     |     |     |     |     |     |     |     |     |     |     |     |     |     |     |     |     |     |     |     |     |     |     |     |     |     |     |     |     |     |     |     |     |     |     |     |     |     |     |     |     |     |     |     |     |     |     |     |     |     |     |     |     |     |     |     |     |     |     |     |     |     |     |     |     |     |     |     |     |     |     |     |     |     |     |     |     |     |     |     |     |     |     |     |     |     |     |     |     |     |     |     |     |     |     |     |     |     |     |     |     |     |     |     |     |     |     |     |     |     |     |     |     |     |     |     |     |     |     |     |     |     |     |     |     |     |     |     |     |     |     |     |     |     |     |     |     |     |     |     |     |     |     |     |     |     |     |     |     |     |     |     |     |     |     |     |     |     |     |     |     |     |     |     |     |     |     |     |     |     |     |     |     |     |     |     |     |     |     |     |     |     |     |     |     |     |     |     |     |     |     |     |     |     |     |     |     |     |     |     |     |     |     |     |     |     |     |     |     |     |     |     |     |     |     |     |     |     |     |     |     |     |     |     |     |     |     |     |     |     |     |     |     |     |     |     |     |     |     |     |     |     |     |     |     |     |     |     |     |     |     |     |     |     |     |     |     |     |     |     |     |     |     |     |     |     |     |     |     |     |     |     |     |     |     |     |     |     |     |     |     |     |     |     |     |     |     |     |     |     |     |     |     |     |     |     |     |     |     |     |     |     |     |     |     |     |     |     |     |     |     |     |     |     |     |     |     |     |     |     |     |     |     |     |     |     |     |     |     |     |     |     |     |     |     |     |     |     |     |     |     |     |     |     |     |     |     |     |     |     |     |     |     |     |     |     |     |     |     |     |     |     |     |     |     |     |     |     |     |     |     |     |     |     |     |     |     |
| SARS-CoV-2 NC_045512.2 | (20258)  | T        | CTTAG  | AA     | TTA    | G      | CTAT   | G      | -GAT   | TGA    | -----  | ---          | ---   | ---  | ---   | ---  | ---  | --- | ---   | ---   | ---    | --- | ---   | ---  | ---    | ---  | --- | --- | --- | --- | ---   | --- | ---  | ---  | ---  | ---   | --- | --- | --- | --- | --- | --- | ---  | --- | --- | --- | --- | --- | --- | --- | --- | --- | --- | --- | --- | --- | --- | --- | --- | --- | --- | --- | --- | --- | --- | --- | --- | --- | --- | --- | --- | --- | --- | --- | --- | --- | --- | --- | --- | --- | --- | --- | --- | --- | --- | --- | --- | --- | --- | --- | --- | --- | --- | --- | --- | --- | --- | --- | --- | --- | --- | --- | --- | --- | --- | --- | --- | --- | --- | --- | --- | --- | --- | --- | --- | --- | --- | --- | --- | --- | --- | --- | --- | --- | --- | --- | --- | --- | --- | --- | --- | --- | --- | --- | --- | --- | --- | --- | --- | --- | --- | --- | --- | --- | --- | --- | --- | --- | --- | --- | --- | --- | --- | --- | --- | --- | --- | --- | --- | --- | --- | --- | --- | --- | --- | --- | --- | --- | --- | --- | --- | --- | --- | --- | --- | --- | --- | --- | --- | --- | --- | --- | --- | --- | --- | --- | --- | --- | --- | --- | --- | --- | --- | --- | --- | --- | --- | --- | --- | --- | --- | --- | --- | --- | --- | --- | --- | --- | --- | --- | --- | --- | --- | --- | --- | --- | --- | --- | --- | --- | --- | --- | --- | --- | --- | --- | --- | --- | --- | --- | --- | --- | --- | --- | --- | --- | --- | --- | --- | --- | --- | --- | --- | --- | --- | --- | --- | --- | --- | --- | --- | --- | --- | --- | --- | --- | --- | --- | --- | --- | --- | --- | --- | --- | --- | --- | --- | --- | --- | --- | --- | --- | --- | --- | --- | --- | --- | --- | --- | --- | --- | --- | --- | --- | --- | --- | --- | --- | --- | --- | --- | --- | --- | --- | --- | --- | --- | --- | --- | --- | --- | --- | --- | --- | --- | --- | --- | --- | --- | --- | --- | --- | --- | --- | --- | --- | --- | --- | --- | --- | --- | --- | --- | --- | --- | --- | --- | --- | --- | --- | --- | --- | --- | --- | --- | --- | --- | --- | --- | --- | --- | --- | --- | --- | --- | --- | --- | --- | --- | --- | --- | --- | --- | --- | --- | --- | --- | --- | --- | --- | --- | --- | --- | --- | --- | --- | --- | --- | --- | --- | --- | --- | --- | --- | --- | --- | --- | --- | --- | --- | --- | --- | --- | --- | --- | --- | --- | --- | --- | --- | --- | --- | --- | --- | --- | --- | --- | --- | --- | --- | --- | --- | --- | --- | --- | --- | --- | --- | --- | --- | --- | --- | --- | --- | --- | --- | --- | --- | --- | --- | --- | --- | --- | --- | --- | --- | --- | --- | --- | --- | --- | --- | --- | --- | --- | --- | --- | --- | --- | --- | --- | --- | --- | --- | --- | --- | --- | --- | --- | --- | --- | --- | --- | --- | --- | --- | --- | --- | --- | --- | --- | --- | --- | --- | --- | --- | --- | --- | --- | --- | --- | --- | --- | --- | --- | --- | --- | --- | --- | --- | --- | --- | --- | --- | --- | --- | --- | --- | --- | --- | --- | --- | --- | --- | --- | --- | --- | --- | --- | --- | --- | --- | --- | --- | --- |

## SARS-CoV-2 &amp; T4.apr

|                        |          |        |        |           |        |        |        |        |        |         |         |         |         |          |              |          |        |            |         |       |       |       |       |       |       |         |       |     |      |      |      |     |      |      |     |     |     |     |     |     |    |     |      |     |       |    |   |   |    |   |   |   |   |   |   |   |   |   |   |   |   |   |   |   |   |   |   |   |   |     |   |     |   |   |   |   |   |
|------------------------|----------|--------|--------|-----------|--------|--------|--------|--------|--------|---------|---------|---------|---------|----------|--------------|----------|--------|------------|---------|-------|-------|-------|-------|-------|-------|---------|-------|-----|------|------|------|-----|------|------|-----|-----|-----|-----|-----|-----|----|-----|------|-----|-------|----|---|---|----|---|---|---|---|---|---|---|---|---|---|---|---|---|---|---|---|---|---|---|---|-----|---|-----|---|---|---|---|---|
|                        |          |        |        |           |        |        |        |        |        |         |         |         |         |          | Section 1086 |          |        |            |         |       |       |       |       |       |       |         |       |     |      |      |      |     |      |      |     |     |     |     |     |     |    |     |      |     |       |    |   |   |    |   |   |   |   |   |   |   |   |   |   |   |   |   |   |   |   |   |   |   |   |     |   |     |   |   |   |   |   |
|                        | (104161) | 104161 | 104170 | 104181    | 104192 | 104203 | 104214 | 104225 | 104236 | 104256  |         |         |         |          |              |          |        |            |         |       |       |       |       |       |       |         |       |     |      |      |      |     |      |      |     |     |     |     |     |     |    |     |      |     |       |    |   |   |    |   |   |   |   |   |   |   |   |   |   |   |   |   |   |   |   |   |   |   |   |     |   |     |   |   |   |   |   |
| T4 NC_000866.4         | (103635) | AAA    | AAGCG  | GTAAAGAC  | TATAT  | TAA    | TG     | AGCAA  | GTTT   | TAACTA  | ACAAGCT | CTCGGAG | AAT     | TAAATCAT | CCTCC        | ACGCGCT  | TAATG  | TTGACCCGAT | G       |       |       |       |       |       |       |         |       |     |      |      |      |     |      |      |     |     |     |     |     |     |    |     |      |     |       |    |   |   |    |   |   |   |   |   |   |   |   |   |   |   |   |   |   |   |   |   |   |   |   |     |   |     |   |   |   |   |   |
| SARS-CoV-2 NC_045512.2 | (20334)  | AG     | ATTTTA | GTCATAGTC | AGT    | TAGG   | TG     | -----  | GTTT   | ACATCTA | -----   | CTGATTG | GACTAGC | TAAACG   | TTTT         | AAGGAATC | ACCTTT | TG         | AATTA   |       |       |       |       |       |       |         |       |     |      |      |      |     |      |      |     |     |     |     |     |     |    |     |      |     |       |    |   |   |    |   |   |   |   |   |   |   |   |   |   |   |   |   |   |   |   |   |   |   |   |     |   |     |   |   |   |   |   |
|                        |          |        |        |           |        |        |        |        |        |         |         |         |         |          | Section 1087 |          |        |            |         |       |       |       |       |       |       |         |       |     |      |      |      |     |      |      |     |     |     |     |     |     |    |     |      |     |       |    |   |   |    |   |   |   |   |   |   |   |   |   |   |   |   |   |   |   |   |   |   |   |   |     |   |     |   |   |   |   |   |
|                        | (104257) | 104257 | 104269 | 104280    | 104291 | 104302 | 104313 | 104324 | 104335 | 104352  |         |         |         |          |              |          |        |            |         |       |       |       |       |       |       |         |       |     |      |      |      |     |      |      |     |     |     |     |     |     |    |     |      |     |       |    |   |   |    |   |   |   |   |   |   |   |   |   |   |   |   |   |   |   |   |   |   |   |   |     |   |     |   |   |   |   |   |
| T4 NC_000866.4         | (103730) | C      | AAG    | CCGC      | TAT    | CAT    | TAT    | A      | GA     | AGA     | TA      | TGTGG   | TGG     | AAA      | GG           | AAAT     | G      | ACGT       | ATA     | CGGA  | CGAG  | CTC   | GT    | GTTAT | TGAAG | GTG     | ACCA  | TGG | TCC  | TGGA | GAT  | A   |      |      |     |     |     |     |     |     |    |     |      |     |       |    |   |   |    |   |   |   |   |   |   |   |   |   |   |   |   |   |   |   |   |   |   |   |   |     |   |     |   |   |   |   |   |
| SARS-CoV-2 NC_045512.2 | (20416)  | G      | AAG    | ATTT      | TAT    | TCC    | TAT    | G      | GA     | CAG     | TA      | CAGT    | TAA     | AAA      | CTATT        | TCATA    | ACAGAT | GCG        | CAA     | CAG   | GT    | TCATC | T     | AGT   | GTG   | TGTG    | TTC   | TGT | TATT | GAT  | T    |     |      |      |     |     |     |     |     |     |    |     |      |     |       |    |   |   |    |   |   |   |   |   |   |   |   |   |   |   |   |   |   |   |   |   |   |   |   |     |   |     |   |   |   |   |   |
|                        |          |        |        |           |        |        |        |        |        |         |         |         |         |          | Section 1088 |          |        |            |         |       |       |       |       |       |       |         |       |     |      |      |      |     |      |      |     |     |     |     |     |     |    |     |      |     |       |    |   |   |    |   |   |   |   |   |   |   |   |   |   |   |   |   |   |   |   |   |   |   |   |     |   |     |   |   |   |   |   |
|                        | (104353) | 104353 | 104368 | 104379    | 104390 | 104401 | 104412 | 104423 | 104434 | 104448  |         |         |         |          |              |          |        |            |         |       |       |       |       |       |       |         |       |     |      |      |      |     |      |      |     |     |     |     |     |     |    |     |      |     |       |    |   |   |    |   |   |   |   |   |   |   |   |   |   |   |   |   |   |   |   |   |   |   |   |     |   |     |   |   |   |   |   |
| T4 NC_000866.4         | (103824) | A      | ATTA   | GCAG      | CTA    | AAT    | ATT    | CG     | TG     | CCGGA   | TGG     | ATTC    | C       | AGG      | AG           | TT       | CT     | TCT        | CGTGGAT | TAG   | G     | TTC   | ATT   | GAC   | TG    | ACACAAA | TGAAG | GT  | A    | TCG  | TAT  | C   | G    | TAA  |     |     |     |     |     |     |    |     |      |     |       |    |   |   |    |   |   |   |   |   |   |   |   |   |   |   |   |   |   |   |   |   |   |   |   |     |   |     |   |   |   |   |   |
| SARS-CoV-2 NC_045512.2 | (20510)  | T      | ATTA   | CTT       | GAT    | GAT    | TT     | GT     | TG     | AAAT    | AATA    | AAAT    | C       | CA       | AG           | ATT      | T      | TCT        | G       | ----- | TAG   | T     | TTC   | TAA   | G     | TG      | ----- | T   | CAA  | AGT  | GA   | C   | ---  | TAT  | T   | G   | ACT |     |     |     |    |     |      |     |       |    |   |   |    |   |   |   |   |   |   |   |   |   |   |   |   |   |   |   |   |   |   |   |   |     |   |     |   |   |   |   |   |
|                        |          |        |        |           |        |        |        |        |        |         |         |         |         |          | Section 1089 |          |        |            |         |       |       |       |       |       |       |         |       |     |      |      |      |     |      |      |     |     |     |     |     |     |    |     |      |     |       |    |   |   |    |   |   |   |   |   |   |   |   |   |   |   |   |   |   |   |   |   |   |   |   |     |   |     |   |   |   |   |   |
|                        | (104449) | 104449 | 104456 | 104467    | 104478 | 104489 | 104500 | 104511 | 104522 | 104533  | 104544  |         |         |          |              |          |        |            |         |       |       |       |       |       |       |         |       |     |      |      |      |     |      |      |     |     |     |     |     |     |    |     |      |     |       |    |   |   |    |   |   |   |   |   |   |   |   |   |   |   |   |   |   |   |   |   |   |   |   |     |   |     |   |   |   |   |   |
| T4 NC_000866.4         | (103920) | A      | CGA    | AG        | GAT    | T      | C      | AA     | ATT    | AACTG   | TAG     | GTG     | TTG     | ATG      | C            | AGT      | AT     | GGG        | GT      | CCA   | AGT   | GCTCC | AGATG | CAT   | GGG   | T       | AAC   | C   | CT   | AAGG | AAAT | TAC | C    | GAAT | TCA | CAG | A   |     |     |     |    |     |      |     |       |    |   |   |    |   |   |   |   |   |   |   |   |   |   |   |   |   |   |   |   |   |   |   |   |     |   |     |   |   |   |   |   |
| SARS-CoV-2 NC_045512.2 | (20591)  | A      | TAC    | AG        | AA     | AT     | TTC    | ATT    | -----  | TATG    | CT      | TTG     | GTG     | TA       | ---          | A        | AGAT   | G          | CCAT    | GT    | ----- | AG    | AA    | CAT   | ---   | T       | T     | ACC | CAA  | AA   | T    | T   | CAAT | ---  | C   | T   | AG  | TCA | --- | A   |    |     |      |     |       |    |   |   |    |   |   |   |   |   |   |   |   |   |   |   |   |   |   |   |   |   |   |   |   |     |   |     |   |   |   |   |   |
|                        |          |        |        |           |        |        |        |        |        |         |         |         |         |          | Section 1090 |          |        |            |         |       |       |       |       |       |       |         |       |     |      |      |      |     |      |      |     |     |     |     |     |     |    |     |      |     |       |    |   |   |    |   |   |   |   |   |   |   |   |   |   |   |   |   |   |   |   |   |   |   |   |     |   |     |   |   |   |   |   |
|                        | (104545) | 104545 | 104555 | 104566    | 104577 | 104588 | 104599 | 104610 | 104621 | 104640  |         |         |         |          |              |          |        |            |         |       |       |       |       |       |       |         |       |     |      |      |      |     |      |      |     |     |     |     |     |     |    |     |      |     |       |    |   |   |    |   |   |   |   |   |   |   |   |   |   |   |   |   |   |   |   |   |   |   |   |     |   |     |   |   |   |   |   |
| T4 NC_000866.4         | (104016) | C      | G      | G         | C      | G      | A      | AG     | C      | G       | AT      | T       | ACAA    | G        | ---          | TG       | C      | G          | AT      | G     | AC    | G     | C     | C     | T     | A       | A     | A   | A    | A    | A    | G   | C    | G    | T   | A   | T   | A   | A   | A   | A  | C   | A    | G   | G     | A  |   |   |    |   |   |   |   |   |   |   |   |   |   |   |   |   |   |   |   |   |   |   |   |     |   |     |   |   |   |   |   |
| SARS-CoV-2 NC_045512.2 | (20668)  | G      | C      | T         | G      | G      | CA     | AC     | C      | G       | G       | T       | ---     | G        | T            | TG       | C      | ---        | AT      | G     | C     | C     | T     | A     | T     | ---     | CT    | T   | T    | ACA  | AA   | AT  | G    | C    | --- | AA  | AG  | AT  | G   | T   | TA | CT  | ---  | TC  | ----- |    |   |   |    |   |   |   |   |   |   |   |   |   |   |   |   |   |   |   |   |   |   |   |   |     |   |     |   |   |   |   |   |
|                        |          |        |        |           |        |        |        |        |        |         |         |         |         |          | Section 1091 |          |        |            |         |       |       |       |       |       |       |         |       |     |      |      |      |     |      |      |     |     |     |     |     |     |    |     |      |     |       |    |   |   |    |   |   |   |   |   |   |   |   |   |   |   |   |   |   |   |   |   |   |   |   |     |   |     |   |   |   |   |   |
|                        | (104641) | 104641 | 104654 | 104665    | 104676 | 104687 | 104698 | 104709 | 104720 | 104736  |         |         |         |          |              |          |        |            |         |       |       |       |       |       |       |         |       |     |      |      |      |     |      |      |     |     |     |     |     |     |    |     |      |     |       |    |   |   |    |   |   |   |   |   |   |   |   |   |   |   |   |   |   |   |   |   |   |   |   |     |   |     |   |   |   |   |   |
| T4 NC_000866.4         | (104110) | CT     | ---    | AC        | AAA    | ATG    | CT     | T      | AAAG   | AA      | CAAC    | TGA     | TT      | G        | CC           | G        | AA     | GC         | G       | AG    | AA    | AT    | TGATG | CT    | T     | CCG     | TTG   | CT  | C    | TTG  | A    | T   | AG   | TAT  | TTT | TC  | GA  | AT  | CA  | GT  | T  | AAT | ATTT | CTC |       |    |   |   |    |   |   |   |   |   |   |   |   |   |   |   |   |   |   |   |   |   |   |   |   |     |   |     |   |   |   |   |   |
| SARS-CoV-2 NC_045512.2 | (20741)  | ---    | ---    | AAA       | ATT    | ATG    | G      | T      | GA     | T       | AG      | TG      | CAAC    | ---      | TT           | ACC      | T      | AA         | AG      | GC    | ---   | AT    | AA    | TGATG | AA    | T       | ---   | GT  | C    | G    | C    | --- | AA   | AT   | TAC | TC  | AA  | CT  | G   | T   | C  | AAT | ATTT | AAA |       |    |   |   |    |   |   |   |   |   |   |   |   |   |   |   |   |   |   |   |   |   |   |   |   |     |   |     |   |   |   |   |   |
|                        |          |        |        |           |        |        |        |        |        |         |         |         |         |          | Section 1092 |          |        |            |         |       |       |       |       |       |       |         |       |     |      |      |      |     |      |      |     |     |     |     |     |     |    |     |      |     |       |    |   |   |    |   |   |   |   |   |   |   |   |   |   |   |   |   |   |   |   |   |   |   |   |     |   |     |   |   |   |   |   |
|                        | (104737) | 104737 | 104742 | 104753    | 104764 | 104775 | 104786 | 104797 | 104808 | 104819  | 104832  |         |         |          |              |          |        |            |         |       |       |       |       |       |       |         |       |     |      |      |      |     |      |      |     |     |     |     |     |     |    |     |      |     |       |    |   |   |    |   |   |   |   |   |   |   |   |   |   |   |   |   |   |   |   |   |   |   |   |     |   |     |   |   |   |   |   |
| T4 NC_000866.4         | (104205) | C      | G      | G         | A      | AGC    | AAA    | AG     | AA     | ACT     | T       | T       | C       | G        | G            | C        | A      | CTG        | TAT     | T     | C     | GA    | AG    | CT    | A     | C       | G     | T   | C    | A    | A    | G   | CA   | GC   | AC  | G   | CCG | T   | T   | --- | AA | TT  | AG   | CT  | GA    | AT | C | T | CA | T | A | T | C | G | C | T | A | A | A | A | T | T | G | C | T | G | A |   |   |     |   |     |   |   |   |   |   |
| SARS-CoV-2 NC_045512.2 | (20823)  | C      | A      | C         | A      | T      | T      | A      | C      | A       | T       | T       | A       | G        | C            | T        | G      | T          | A       | C     | C     | T     | A     | T     | A     | A       | T     | A   | T    | A    | T    | T   | T    | G    | G   | T   | G   | C   | T   | G   | T  | T   | C    | T   | G     | A  | T | A | A  | G | G | A | G | T | G | C | A | C | A | G | G | T | A | C | A | G | C | T | G | --- | T | --- | T | T | T | A | A |

## SARS-CoV-2 &amp; T4.apr

|                        |          |                                                                                                      |        |        |        |        |        |        |        |               |
|------------------------|----------|------------------------------------------------------------------------------------------------------|--------|--------|--------|--------|--------|--------|--------|---------------|
|                        |          |                                                                                                      |        |        |        |        |        |        |        | Section 1093  |
|                        | (104833) | 104833                                                                                               | 104841 | 104852 | 104863 | 104874 | 104885 | 104896 | 104907 | 104928        |
| T4 NC_000866.4         | (104299) | AAAAGCAGAAAGAGAGTAAAGAAATAAAGAAAGAGCCGAGAGAAAGCTGAGAGAGAAATCGCTGAGCAAGCTTCTAAAATTCAATTGACCATCT       |        |        |        |        |        |        |        |               |
| SARS-CoV-2 NC_045512.2 | (20915)  | GACAGTGGTTGCTTACG--GTAACGCTGCTTGTCGATTCAAGATCTTAAAGACTT-----TGTCTGATGCAAGATTCAACTTTGATTGGTGATGTG     |        |        |        |        |        |        |        |               |
|                        |          |                                                                                                      |        |        |        |        |        |        |        | Section 1094  |
|                        | (104929) | 104929                                                                                               | 104940 | 104951 | 104962 | 104973 | 104984 | 104995 | 105006 | 105024        |
| T4 NC_000866.4         | (104395) | TGCAAAAGAAATGGCTCGCTGAAATA-----AATTAGCAGTTG-ATAAGAGCATCAAGCCGAACTGTTTGAAATCCATG-CTTGGTGGAATTAA       |        |        |        |        |        |        |        |               |
| SARS-CoV-2 NC_045512.2 | (21003)  | TGCAAACTGTACATACAGCTAATAATATGGGATCTCATTAATTAGTGATATGTACGACCCTAAGACTAAAAATG---TACAAGAGAAAAAGACTCTAA   |        |        |        |        |        |        |        |               |
|                        |          |                                                                                                      |        |        |        |        |        |        |        | Section 1095  |
|                        | (105025) | 105025                                                                                               | 105039 | 105050 | 105061 | 105072 | 105083 | 105094 | 105105 | 105120        |
| T4 NC_000866.4         | (104482) | AGAGCTCTTTTGTGTAACACACGTGTGTTGTTCCAGAGAAATCAGTTGATGTTGTAGCTGAAAAGGAGAGCTGCAAGAACATAAAGAAAGATC        |        |        |        |        |        |        |        |               |
| SARS-CoV-2 NC_045512.2 | (21096)  | AGAGGGTFTTTTCACTTACATTTGTGGTGTATACAAACAAAGCAGCTCTTGTGAGGTTCCGTGGCTATAAAGATAACAGAACATCTCTG-GAATG      |        |        |        |        |        |        |        |               |
|                        |          |                                                                                                      |        |        |        |        |        |        |        | Section 1096  |
|                        | (105121) | 105121                                                                                               | 105127 | 105138 | 105149 | 105160 | 105171 | 105182 | 105193 | 105204 105216 |
| T4 NC_000866.4         | (104578) | GCCTCGTCTGTTCGAAGAACTGAATATGCGCG-ACGCATATATCAATTTATGTGCAAGCCTGAAAGTGGCATTGAGCGAAAGTACTAA-AGATCTGACT  |        |        |        |        |        |        |        |               |
| SARS-CoV-2 NC_045512.2 | (21191)  | CTGATCTTTATAAGCTCATGGGACACTTCGCGAT-GGTGGACAGCCTTTGTACTAATGTGAA-----TGCGTCAATCACTCTGAAAGCATTTTAAAT    |        |        |        |        |        |        |        |               |
|                        |          |                                                                                                      |        |        |        |        |        |        |        | Section 1097  |
|                        | (105217) | 105217                                                                                               | 105226 | 105237 | 105248 | 105259 | 105270 | 105281 | 105292 | 105312        |
| T4 NC_000866.4         | (104672) | GAGTCTCAAAAAGGAAAAGTCTCTGCTGCTGGTGG--AAGGTATGGATTATTTAGATG-CATTCTCAAGTAAATTGAGT-GCAATCTGTAGAAATGGT   |        |        |        |        |        |        |        |               |
| SARS-CoV-2 NC_045512.2 | (21279)  | TGG-----ATGTAAATTACTTGGGAAACCAAGCGAACAAATAGATGGTT---ATGTCTATGCATGC--AAATTACATAT--TTGGAGGAA----       |        |        |        |        |        |        |        |               |
|                        |          |                                                                                                      |        |        |        |        |        |        |        | Section 1098  |
|                        | (105313) | 105313                                                                                               | 105325 | 105336 | 105347 | 105358 | 105369 | 105380 | 105391 | 105408        |
| T4 NC_000866.4         | (104764) | GAGAAATCTAATAAAGATG-AAAGC---ACTATTACTTGAGAG-GTATAAATACTCCGTGATCTGAAGCAGCCGGACTGA-ATTTCGTCACGTGAAGC   |        |        |        |        |        |        |        |               |
| SARS-CoV-2 NC_045512.2 | (21357)  | -TACAAATCCAAATTCAGTGTCTTTCCTATTCTTTATTGAGCATGAGTAAATTTCCCTTAATAATTAAAGGG---GTACTGCTGTATTATGTCCTTAA-- |        |        |        |        |        |        |        |               |
|                        |          |                                                                                                      |        |        |        |        |        |        |        | Section 1099  |
|                        | (105409) | 105409                                                                                               | 105424 | 105435 | 105446 | 105457 | 105468 | 105479 | 105490 | 105504        |
| T4 NC_000866.4         | (104854) | TGTAGAAGATAAAGCTGCACAGGGTGCAGAAGATATTGTAAGTGATATAAGCGAAAGTCGCATCTCGTTCTAAATTTTAAAGGTTAACACAAATGAC    |        |        |        |        |        |        |        |               |
| SARS-CoV-2 NC_045512.2 | (21447)  | AGAAGGTCAAATCAAATGATATG-----ATTTATATCTCTTCTTAGTAAAGGTAGA-----CTTATAATTAGAGA-----AAACAAACAGAG         |        |        |        |        |        |        |        |               |

## SARS-CoV-2 &amp; T4.apr

|                                |          |          |           |              |              |             |                   |                 |                       |               |
|--------------------------------|----------|----------|-----------|--------------|--------------|-------------|-------------------|-----------------|-----------------------|---------------|
|                                |          |          |           |              |              |             |                   |                 |                       | Section 1100  |
|                                | (105505) | 105505   | 105512    | 105523       | 105534       | 105545      | 105556            | 105567          | 105578                | 105589 105600 |
| T4 NC_000866.4 (104950)        | TATCA    | AAA-CTA  | AAAGCTG   | AACTTTT      | GAACAAAT     | GGAAAGCCATT | ACTGGAAGGTGAAGGTT | TACCGGAAA       | TTGCTAATAGCAAACAAGCGA | TTATCG        |
| SARS-CoV-2 NC_045512.2 (21521) | TGTGTTA  | TTTCTA   | GTGATG    | TTCTTGT      | TAAACAACT    | AAACGACATG  | T-----T           | ---TGT          | TTTCTT-----GTT        | TTATG         |
|                                |          |          |           |              |              |             |                   |                 |                       | Section 1101  |
|                                | (105601) | 105601   | 105611    | 105622       | 105633       | 105644      | 105655            | 105666          | 105677                | 105696        |
| T4 NC_000866.4 (105045)        | CTAA     | AACTCT   | TTGAAAC   | CAGGAAAAAGAT | TTCCAGACAGCT | CCGGAATAT   | AAAGACGAAAAAAT    | TGCTCAGGC       | ATTTCGGT              | TCTTTCTTAA    |
| SARS-CoV-2 NC_045512.2 (21587) | C--CAC   | TAGTCTCT | AGT       | CAGTGT---    | GTTAATCTT    | ACA--A      | CCA               | GAACTC          | AAATTACCC             | ---CTGCAT     |
|                                |          |          |           |              |              |             |                   |                 |                       | Section 1102  |
|                                | (105697) | 105697   | 105710    | 105721       | 105732       | 105743      | 105754            | 105765          | 105776                | 105792        |
| T4 NC_000866.4 (105141)        | CTGAAATC | GGTGGT   | GAACAGGGT | TACAAATGCT   | TACCAACATC   | GCTGCAGGT   | TCAGACTTC         | TGGCGCAGT       | AACTCAGATT            | GGCCAGCT      |
| SARS-CoV-2 NC_045512.2 (21664) | T-----   | GGTGGT   | TTAATT    | ACCTGACAA    | AGTTTTCAG    | -ATCCT--    | CAGTTTTACA        | TTT             | ---AACTCA             | ---GGA        |
|                                |          |          |           |              |              |             |                   |                 |                       | Section 1103  |
|                                | (105793) | 105793   | 105798    | 105809       | 105820       | 105831      | 105842            | 105853          | 105864                | 105875 105888 |
| T4 NC_000866.4 (105237)        | TGGTACGT | CGTG-CTA | TTCC----  | TAACTG       | ATTGCTTT     | CGATATTT    | TGTGGTGTTCAG      | CCGAT---        | GAACAGCCC             | GACTGGCCAG    |
| SARS-CoV-2 NC_045512.2 (21731) | -----    | CTTTCTT  | TTCC      | AATGTT       | ACTTGG       | TTCCATG     | CTATACAT          | TGTC-TCT        | TGGGACCAAT            | GGTACTAAGAG   |
|                                |          |          |           |              |              |             |                   |                 |                       | Section 1104  |
|                                | (105889) | 105889   | 105897    | 105908       | 105919       | 105930      | 105941            | 105952          | 105963                | 105984        |
| T4 NC_000866.4 (105325)        | GGCGC    | CAGTAT   | ATGGT     | TAAAGACCCAGT | GGCTGCC      | GGTGC       | TAAAGAA           | GCATTCCAC       | CCAAATGT              | ATGGTC--      |
| SARS-CoV-2 NC_045512.2 (21811) | CCTAC    | CATTTA   | ATGAT     | -----        | -----        | GGTGT       | TTATTTT           | GC-TTCCAC       | TGAG--                | AAGTCTAA      |
|                                |          |          |           |              |              |             |                   |                 |                       | Section 1105  |
|                                | (105985) | 105985   | 105996    | 106007       | 106018       | 106029      | 106040            | 106051          | 106062                | 106080        |
| T4 NC_000866.4 (105419)        | GCTGCT   | AAGAAATT | CCCAGCTCT | GGCTGC       | TAGCACAC     | AAACCA      | CAGTAGGTGA        | TATCTATAC       | TCACTTCTTT            | CCAGGAAAC     |
| SARS-CoV-2 NC_045512.2 (21884) | ACTACT   | T-----   | -----     | -----        | TAGATT       | TCGAA       | GA                | CCAGT           | ---CCC                | TACTAT        |
|                                |          |          |           |              |              |             |                   |                 |                       | Section 1106  |
|                                | (106081) | 106081   | 106095    | 106106       | 106117       | 106128      | 106139            | 106150          | 106161                | 106176        |
| T4 NC_000866.4 (105515)        | CAAGC    | TTCTG    | TTCAA     | GTAA         | CAATC        | GATGCT      | GGTGCGACTGA       | TGCTGCTAAATTAGA | TGCTGAA               | ATTAA         |
| SARS-CoV-2 NC_045512.2 (21955) | TGAAT    | TTCAA    | TTT       | GTAA         | TGATC        | CAT         | -----             | TTT             | TG--G                 | -----         |

## SARS-CoV-2 &amp; T4.apr

|                        |          |        |         |          |           |            |            |         |             |            |          |              |          |        |        |          |         |       |        |        |          |       |       |      |         |    |
|------------------------|----------|--------|---------|----------|-----------|------------|------------|---------|-------------|------------|----------|--------------|----------|--------|--------|----------|---------|-------|--------|--------|----------|-------|-------|------|---------|----|
|                        |          |        |         |          |           |            |            |         |             |            |          | Section 1107 |          |        |        |          |         |       |        |        |          |       |       |      |         |    |
|                        | (106177) | 106177 | 106183  | 106194   | 106205    | 106216     | 106227     | 106238  | 106249      | 106260     | 106272   |              |          |        |        |          |         |       |        |        |          |       |       |      |         |    |
| T4 NC 000866.4         | (105610) | AG-AAA | TCGCTGA | AGGTAT   | GGCTACTC  | -TATCGCTGA | ACTCCAGGAA | GGTTTC  | AAAT--GGTTC | TACCGATAAC | CCATGG   | AATGAAAT     | TGGCTTCC |        |        |          |         |       |        |        |          |       |       |      |         |    |
| SARS-CoV-2 NC_045512.2 | (22024)  | AAGTGA | AGTTCA  | GAGTTTAT | -TCTAGTGG | GAATAAT    | TGCACTTT   | -TGAA   | TATGCTCT    | CAGCCTTT   | TCTTAT   | GGAAGG       | CCATGA   |        |        |          |         |       |        |        |          |       |       |      |         |    |
|                        |          |        |         |          |           |            |            |         |             |            |          | Section 1108 |          |        |        |          |         |       |        |        |          |       |       |      |         |    |
|                        | (106273) | 106273 | 106282  | 106293   | 106304    | 106315     | 106326     | 106337  | 106348      | 106368     |          |              |          |        |        |          |         |       |        |        |          |       |       |      |         |    |
| T4 NC 000866.4         | (105707) | G      | TATCGAT | AAAGCA   | AGTTAT    | TCGAA      | GCTTAA     | ATCTCGT | CAGCTGA     | AAAGCTGC   | TTACTCT  | TATTGA       | ATTAG    | CACAAG | ACCTC  | C        | CGCG    | TGTT  | CACGG  | TATGG  |          |       |       |      |         |    |
| SARS-CoV-2 NC_045512.2 | (22118)  | T      | T--C    | ---AAAA  | TC        | TTAGG      | AAATTT     | --GT    | GT          | T-TA       | AGAA     | ATTG         | ATG      | TTAT   | TTTAA  | AT       | ATTCTA  | AGCAC | CC--   | TATTA  | --TT-TAG |       |       |      |         |    |
|                        |          |        |         |          |           |            |            |         |             |            |          | Section 1109 |          |        |        |          |         |       |        |        |          |       |       |      |         |    |
|                        | (106369) | 106369 | 106381  | 106392   | 106403    | 106414     | 106425     | 106436  | 106447      | 106464     |          |              |          |        |        |          |         |       |        |        |          |       |       |      |         |    |
| T4 NC 000866.4         | (105798) | ATGC   | TGATG   | CTGAA    | CTGTCT    | GGTATT     | CTGGCTAC   | AGAA    | ATTATG      | CTGG       | AAATCA   | ACCGTGA      | AGTTG    | TTGATT | GGATTA | ACTT     | ACTC    | AGCT  | CAGG   | TTG    |          |       |       |      |         |    |
| SARS-CoV-2 NC_045512.2 | (22200)  | TGCG   | TGATC   | ---TC    | CTCAG     | GGT        | TTTC       | GGCTTT  | AGAA        | CCAT       | TGGT     | TAGATT       | TGCC     | ---AAT | AGTA   | TTAACATC | ACTAGG  | TTTCA | AACT   | TTTAC  | TTG      |       |       |      |         |    |
|                        |          |        |         |          |           |            |            |         |             |            |          | Section 1110 |          |        |        |          |         |       |        |        |          |       |       |      |         |    |
|                        | (106465) | 106465 | 106480  | 106491   | 106502    | 106513     | 106524     | 106535  | 106546      | 106560     |          |              |          |        |        |          |         |       |        |        |          |       |       |      |         |    |
| T4 NC 000866.4         | (105894) | G      | TAAATCT | TGGTAT   | TGACCC    | TGAC       | ---T       | CCGG    | GTTC        | ---T       | AAAG     | CTGG         | TGTATT   | TGAC   | TTCC   | CAGG     | ACC     | CAAT  | TGAT   | ATTC   | GTGG     | TGC   | TCGCT | GGGC | GG      |    |
| SARS-CoV-2 NC_045512.2 | (22290)  | C      | TTTACA  | TAGAA    | GTTATT    | TGAC       | TCC        | TGGT    | GATTC       | TTCTTC     | AG       | TTGG         | AC       | AG     | TTG    | GACAGC   | TGG     | -TGC  | TGCA   | -GCTTA | TTAT     | TGGGT | TATCT | TC   | AACCTAG | GA |
|                        |          |        |         |          |           |            |            |         |             |            |          | Section 1111 |          |        |        |          |         |       |        |        |          |       |       |      |         |    |
|                        | (106561) | 106561 | 106568  | 106579   | 106590    | 106601     | 106612     | 106623  | 106634      | 106645     | 106656   |              |          |        |        |          |         |       |        |        |          |       |       |      |         |    |
| T4 NC 000866.4         | (105984) | G      | TGAATCC | TTTAAA   | GCTCT     | GTTGTTCC   | CAGAT      | TGACAA  | AGCAG       | TTGAA      | ATTG     | CTC          | GT       | CAGAC  | CGGT   | CGTGGT   | GAAGGTA | ACTT  | CATT   | ATTC   | GCCT     | T     |       |      |         |    |
| SARS-CoV-2 NC_045512.2 | (22383)  | C      | TTTTCTA | TTAAA    | TAT       | ---A       | -----A     | TGA     | AAAT        | GGA        | ACAT     | TTAC         | AGATG    | CT     | -GT    | -AGAC    | TGTC    | ----- | ACTT   | G      | ACCC     | TCTCT | -     |      |         |    |
|                        |          |        |         |          |           |            |            |         |             |            |          | Section 1112 |          |        |        |          |         |       |        |        |          |       |       |      |         |    |
|                        | (106657) | 106657 | 106667  | 106678   | 106689    | 106700     | 106711     | 106722  | 106733      | 106752     |          |              |          |        |        |          |         |       |        |        |          |       |       |      |         |    |
| T4 NC 000866.4         | (106080) | C      | CGTAAC  | GTAGT    | TAA       | ACGTT      | TTGG       | --CTTCA | GTTG        | ATACCGGC   | ATTTCTTT | ATGCTG       | CAC      | AGGGTC | TGGCTA | C        | CGGCTTT | TAG   | CACTGA | TACT   | ACCAA    |       |       |      |         |    |
| SARS-CoV-2 NC_045512.2 | (22452)  | -      | CAGA    | AACAA    | AGTGT     | ACGTT      | GAAATC     | CTTCA   | CTGT        | AGAA       | ---A     | AGGA         | --AT     | CTAT   | CAAA   | ACT--T   | -----   | CTAA  | CTTTAG | AG---  | TCCA     | ACCAA |       |      |         |    |
|                        |          |        |         |          |           |            |            |         |             |            |          | Section 1113 |          |        |        |          |         |       |        |        |          |       |       |      |         |    |
|                        | (106753) | 106753 | 106766  | 106777   | 106788    | 106799     | 106810     | 106821  | 106832      | 106848     |          |              |          |        |        |          |         |       |        |        |          |       |       |      |         |    |
| T4 NC 000866.4         | (106174) | GT     | CAGTAT  | TTTGC    | TGGT      | GTTCTGGG   | TGGTA      | ATA     | CCGCG       | TATAT      | AT       | CGAC         | CAGTA    | TGCTAA | ACAGG  | ATTATTT  | CAC     | TGTAG | GTTTAA | AGGT   | CCGAA    |       |       |      |         |    |
| SARS-CoV-2 NC_045512.2 | (22530)  | --     | CAGAA   | ATCTAT   | TGTTA     | -----      | GATTT      | CC      | TAAAT       | --AT       | TACA     | AACT         | -TG      | TGC    | CTTTT  | GG       | -----   | TGA   | AGTTT  | TAA    | --CG     | CCACC |       |      |         |    |

## SARS-CoV-2 & T4.apr

Figure 1: Multiple sequence alignment of the SARS-CoV-2 NC\_045512.2 genome (111,882 bp) with the T4 NC\_000866.4 genome (26,850 bp) across 11 sections. The alignment is shown in a grid format, with the T4 genome sequence (NC\_000866.4) on the left and the SARS-CoV-2 genome sequence (NC\_045512.2) on the right. The sequences are color-coded: yellow for conserved regions, green for variable regions, and red for gaps. The alignment is divided into 11 sections, each labeled with a section number (1114 to 1120) and a range of positions. The sequences are aligned in a way that shows the high degree of similarity between the two genomes, with the SARS-CoV-2 genome being a close match to the T4 genome.

| Section      | T4 NC_000866.4 (NC_000866.4)                                                   | SARS-CoV-2 NC_045512.2                                                                                                                                                                                  |
|--------------|--------------------------------------------------------------------------------|---------------------------------------------------------------------------------------------------------------------------------------------------------------------------------------------------------|
| Section 1114 | (106849) 106849 106854 106865 106876 106887 106898 106909 106920 106931 106944 | (106270) C G A A A T G G A T G C T G G T A T T T A C T A T G C T C C A T A T G T A G C T C T G -- A C T C C G C T G C - G T G G T T C G A T C C G A A G A A C T T C C A A C C G G T A A T T G G G A T T |
| Section 1115 | (106945) 106945 106953 106964 106975 106986 106997 107008 107019 107040        | (106363) C A A A C T C G T T A C G G T A T C G G T A T C A A C C A T T T G C A G A A T C C G C T G C T C A G G C T C C G G C T T C T C G C A T C C A G A G C G G T A T G C C T T C T A T T C T G A A    |
| Section 1116 | (107041) 107041 107052 107063 107074 107085 107096 107107 107118 107136        | (106459) T A G C C T T G G T A - A A A C G C T T A C T T T A G A C G T G T A T A T G T T A A A G G T A T C T A A T C T C T A A C G A T A G A A C A C A A T T T T A G G G A A C C T T C G G G T T C C    |
| Section 1117 | (107137) 107137 107151 107162 107173 107184 107195 107206 107217 107232        | (106554) C T T T T T C T A T T T T A T A C G A T A G C A A T C A G G C A T A T C A T C C G C A T T T A T C C A A T T G C G A A T A G T T T A G G A C T A A C T T T A A A A T G C T C C G C T G C G T    |
| Section 1118 | (107233) 107233 107239 107250 107261 107272 107283 107294 107305 107316 107328 | (106650) A A T C A G G A T T A T C A A A T T T A A C G C C T T T A T A C A T A T T G G A A T A A A T T T T T T A - - A T A C C A C C A A G T T T T T C A G A A A T A G C T T T A C G A - - T G T G A A  |
| Section 1119 | (107329) 107329 107338 107349 107360 107371 107382 107393 107404 107424        | (106742) A T C G A T A T A G G T T T G T T T T T C G T G G A T G A A C A T G T G T T T T A A A T - - A T T C A T T G C G C C C T T T A A C - T C G C T T C G C A A T A G T T T C A T C A G A T T T G C  |
| Section 1120 | (107425) 107425 107437 107448 107459 107470 107481 107492 107503 107520        | (106835) T T A A C G C T G T T T T T G C C T T T G A T A T T T T C G T T T A G C T T C C A C A G T C A T T C T T C T T T T G T T C G T A T T G A T A A C A T A T T A C G A T A T G A A G G A T C T      |



## SARS-CoV-2 & T4.apr

|                        |          |          |              |        |      |         |       |        |        |        |       |        |        |        |       |        |        |        |
|------------------------|----------|----------|--------------|--------|------|---------|-------|--------|--------|--------|-------|--------|--------|--------|-------|--------|--------|--------|
|                        |          |          | Section 1121 |        |      |         |       |        |        |        |       |        |        |        |       |        |        |        |
|                        | (107521) | 107521   |              | 107536 |      | 107547  |       | 107558 |        | 107569 |       | 107580 |        | 107591 |       | 107602 |        | 107616 |
| T4 NC                  | 000866.4 | (106931) | TG           | CAA    | TGA  | ACTAT   | TA    | CTGG   | ATTT   | CCTCT  | GC    | CAC    | CAAT   | TAGC   | AGCAT | TAT    | AGG    | TAT    |
| SARS-CoV-2 NC_045512.2 | (23178)  |          | -T           | CAA    | TTTC | AACTT   | CA    | TGG    | --TT   | TAA    | CAG   | GC     | CAC    | AGGT   | GT    | TCTT   | ACT    | GAG    |
|                        |          |          |              |        |      |         |       |        |        |        |       |        |        |        |       |        |        |        |
|                        |          |          | Section 1122 |        |      |         |       |        |        |        |       |        |        |        |       |        |        |        |
|                        | (107617) | 107617   |              | 107624 |      | 107635  |       | 107646 |        | 107657 |       | 107668 |        | 107679 |       | 107690 |        | 107701 |
| T4 NC                  | 000866.4 | (107027) | ATT          | TTAT   | ACA  | TCTC    | CTCAG | ATG    | AGGAGA | AAGA   | ATAA  | AGAA   | TTT    | CCTT   | TT    | TTAA   | AG     | TTA    |
| SARS-CoV-2 NC_045512.2 | (23267)  |          | ATT          | GCTG   | ACA  | CTAG    | CTGAT | GCTG   | TCCGTG | ATCC   | ACAG  | ACACT  | TTGAGA | TTCT   | TTG   | ACATTA | C---   | ACC    |
|                        |          |          |              |        |      |         |       |        |        |        |       |        |        |        |       |        |        |        |
|                        |          |          | Section 1123 |        |      |         |       |        |        |        |       |        |        |        |       |        |        |        |
|                        | (107713) | 107713   |              | 107723 |      | 107734  |       | 107745 |        | 107756 |       | 107767 |        | 107778 |       | 107789 |        | 107808 |
| T4 NC                  | 000866.4 | (107122) | G            | CCAG   | AA   | CCAT    | ATA   | AC     | CATC   | GTTTT  | CGT   | CA     | AGAG   | TAGC   | ATGAG | C      | TCCG   | ATG    |
| SARS-CoV-2 NC_045512.2 | (23359)  |          | A            | CCAG   | GA   | AC---   | AA    | TAG    | TTCT   | TA--   | AC--  | CAG--  | GT     | TGC    | TGTT  | C--    | TTT--- | AT     |
|                        |          |          |              |        |      |         |       |        |        |        |       |        |        |        |       |        |        |        |
|                        |          |          | Section 1124 |        |      |         |       |        |        |        |       |        |        |        |       |        |        |        |
|                        | (107809) | 107809   |              | 107822 |      | 107833  |       | 107844 |        | 107855 |       | 107866 |        | 107877 |       | 107888 |        | 107904 |
| T4 NC                  | 000866.4 | (107218) | T            | TCAT   | TTT  | AAAC    | ATC   | ACTCC  | GTTT   | TG     | TAT   | ATG    | ATT    | ATA    | TAT   | CA     | TAT    | CA     |
| SARS-CoV-2 NC_045512.2 | (23420)  |          | G            | TC     | CTG  | TT----- | GC    | TAT    | TTC    | ATG    | CAG   | AT     | CA     | ACT    | TAC   | TCC    | TACT   | TG     |
|                        |          |          |              |        |      |         |       |        |        |        |       |        |        |        |       |        |        |        |
|                        |          |          | Section 1125 |        |      |         |       |        |        |        |       |        |        |        |       |        |        |        |
|                        | (107905) | 107905   |              | 107910 |      | 107921  |       | 107932 |        | 107943 |       | 107954 |        | 107965 |       | 107976 |        | 107987 |
| T4 NC                  | 000866.4 | (107313) | GG           | AA     | TACA | ATGG    | CT    | AAA    | ATCA   | ACGA   | ACTT  | CTG    | CG     | CGA    | ATCA  | ACCA   | CAAC   | GA     |
| SARS-CoV-2 NC_045512.2 | (23495)  |          | ---          | ACA    | CGT  | GCA     | GGCT  | GTT    | --T    | AA     | ----- | TAG    | GG     | CTG    | AA    | CA     | -TGT   | CAAC   |
|                        |          |          |              |        |      |         |       |        |        |        |       |        |        |        |       |        |        |        |
|                        |          |          | Section 1126 |        |      |         |       |        |        |        |       |        |        |        |       |        |        |        |
|                        | (108001) | 108001   |              | 108009 |      | 108020  |       | 108031 |        | 108042 |       | 108053 |        | 108064 |       | 108075 |        | 108096 |
| T4 NC                  | 000866.4 | (107408) | G            | CGT    | TAC  | G       | ACT   | AA     | TTA    | ATAT   | AT    | TC     | TGAC   | ATT    | TG    | TAG    | CAA    | CG     |
| SARS-CoV-2 NC_045512.2 | (23568)  |          | G            | TAT    | TG   | G       | CTA   | -G     | TTA    | TC     | AG    | AC     | TC     | AGAC   | TA    | AT     | TCT    | CCT    |
|                        |          |          |              |        |      |         |       |        |        |        |       |        |        |        |       |        |        |        |
|                        |          |          | Section 1127 |        |      |         |       |        |        |        |       |        |        |        |       |        |        |        |
|                        | (108097) | 108097   |              | 108108 |      | 108119  |       | 108130 |        | 108141 |       | 108152 |        | 108163 |       | 108174 |        | 108192 |
| T4 NC                  | 000866.4 | (107504) | A            | CA     | AC   | GAA     | TTT   | A      | CAT    | TTT    | AAA   | CT     | GGT    | GCT    | A     | CTT    | AC     | CT     |
| SARS-CoV-2 NC_045512.2 | (23654)  |          | T            | CA     | CT   | GGT     | TG    | CA     | G----  | AAA    | AT    | TC     | AG     | TG     | CTT   | ACT    | CT     |        |

## SARS-CoV-2 &amp; T4.apr

|                        |          |                                                                                                     |        |        |        |        |        |        |        |               |
|------------------------|----------|-----------------------------------------------------------------------------------------------------|--------|--------|--------|--------|--------|--------|--------|---------------|
|                        |          |                                                                                                     |        |        |        |        |        |        |        | Section 1128  |
|                        | (108193) | 108193                                                                                              | 108207 | 108218 | 108229 | 108240 | 108251 | 108262 | 108273 | 108288        |
| T4 NC_000866.4         | (107600) | TAACTCTCAATAAAGGCGATTATTCAAATATAATAATATCGTTTATAAAGTATTAGAAAGATACTCATTGCTACTATCGAAGAAAGTGATTTAG      |        |        |        |        |        |        |        |               |
| SARS-CoV-2 NC_045512.2 | (23736)  | AATTCCT-ACCAGTGTCTATGACC-AAGACATCAGTAGATGTACATGTACATTTGTGTGATTCACCT--GAATGCAGCATCTTT-TGTTGC         |        |        |        |        |        |        |        |               |
|                        |          |                                                                                                     |        |        |        |        |        |        |        | Section 1129  |
|                        | (108289) | 108289                                                                                              | 108295 | 108306 | 108317 | 108328 | 108339 | 108350 | 108361 | 108372 108384 |
| T4 NC_000866.4         | (107696) | AATTAGCTCTTCAGATTGCAATCGTTCTTTTAAAGGTTCGTCATTTTTCTGACGCAGCGTCAACAAAGCAAAATTTGAAAGCTCTGATAGTGAAATTTG |        |        |        |        |        |        |        |               |
| SARS-CoV-2 NC_045512.2 | (23826)  | AAT----ATGGCAGTTTGTGTAC--ACAACTAAACCGTTCCTTA--ACTGGAATAG-CGTGTGAAACAAGACAAAACAACCAGAAGTTT--TTG      |        |        |        |        |        |        |        |               |
|                        |          |                                                                                                     |        |        |        |        |        |        |        | Section 1130  |
|                        | (108385) | 108385                                                                                              | 108394 | 108405 | 108416 | 108427 | 108438 | 108449 | 108460 | 108480        |
| T4 NC_000866.4         | (107792) | CGGATGCTAGATTTCAGATTAAATAAATGGCAAACTGCAGTTAAATCTCGTAAAC-TTAAACCTGGCATCACAGTTGAATTAGCGCAAGATTTAGAA   |        |        |        |        |        |        |        |               |
| SARS-CoV-2 NC_045512.2 | (23910)  | CACAAATCAAA---CAAAATTAACAAAACAG---CACCAATTAAGATTGTTTGGTGGTTTAAATTTT---CACAAATATTAC---AGATCCATCA     |        |        |        |        |        |        |        |               |
|                        |          |                                                                                                     |        |        |        |        |        |        |        | Section 1131  |
|                        | (108481) | 108481                                                                                              | 108493 | 108504 | 108515 | 108526 | 108537 | 108548 | 108559 | 108576        |
| T4 NC_000866.4         | (107887) | GCAAAATGGATTTCGATGCTCTTAATTCTTGAAGATTGCTTGCAACTGAAATGGCAGATGAATCAATAAAGACATCTGTCAGTCTTTGATTACA      |        |        |        |        |        |        |        |               |
| SARS-CoV-2 NC_045512.2 | (23993)  | --AAACCAAGCAAGAGGTCAT----TATTGAAGATCTACTTTTCAACAAGTGACACTTGCA-----G--ATGCTGGCTTCAT--CAAACA          |        |        |        |        |        |        |        |               |
|                        |          |                                                                                                     |        |        |        |        |        |        |        | Section 1132  |
|                        | (108577) | 108577                                                                                              | 108592 | 108603 | 108614 | 108625 | 108636 | 108647 | 108658 | 108672        |
| T4 NC_000866.4         | (107983) | GTTTCAAAACGCTATAAAGTTACAGGAATTACTGATAGTGGATTCATCGATTTGAGTTATGCATCTGCTCTGAAGCTGGTTCGTTCAATATACCGA    |        |        |        |        |        |        |        |               |
| SARS-CoV-2 NC_045512.2 | (24070)  | ATAATGGTG-----ATTGCCTTGGTGATATTGCTGCTAGAGACC TCAT--TTGTGCACAAAGTTAAACGGCCTTA----CTGTTTTGCCACCTTTG   |        |        |        |        |        |        |        |               |
|                        |          |                                                                                                     |        |        |        |        |        |        |        | Section 1133  |
|                        | (108673) | 108673                                                                                              | 108680 | 108691 | 108702 | 108713 | 108724 | 108735 | 108746 | 108757 108768 |
| T4 NC_000866.4         | (108079) | ATGGTATGTGAAATGGTTTCGCATATCAAAAAGAACTCAACTTATACAGCAACGTTCTGTGTTGCTTCAGCTCGTGCCGTGCGATTCTTGCTGCA     |        |        |        |        |        |        |        |               |
| SARS-CoV-2 NC_045512.2 | (24155)  | CTCACAGAAGAAATGATT--G-----CTCAATACACT-----T-CTGCACTGTT--AGCGGGTACAATCACTTCTGTTTGACCTTTGGTGCA        |        |        |        |        |        |        |        |               |
|                        |          |                                                                                                     |        |        |        |        |        |        |        | Section 1134  |
|                        | (108769) | 108769                                                                                              | 108779 | 108790 | 108801 | 108812 | 108823 | 108834 | 108845 | 108864        |
| T4 NC_000866.4         | (108175) | TCAGGCTGGTTAAACCATAAACCAAGATGA-CAAATATCTTTCACAA--AATGCCCTACGGGTCTTAGCTAATGGTTTACCGCTTTATTGCG-A      |        |        |        |        |        |        |        |               |
| SARS-CoV-2 NC_045512.2 | (24233)  | G-GTGCTGCATTAA--CAAAATACCAATTTGCTATGCAAATGGCTTATAGGTTTAAATGGATTGGAGTTACACAGAAATGTTCTCTATGAGAACCAAAA |        |        |        |        |        |        |        |               |

## SARS-CoV-2 & T4.apr

|                        |          |          |              |        |         |         |        |        |          |         |        |  |
|------------------------|----------|----------|--------------|--------|---------|---------|--------|--------|----------|---------|--------|--|
|                        |          |          | Section 1135 |        |         |         |        |        |          |         |        |  |
|                        | (108865) | 108865   | 108878       | 108889 | 108900  | 108911  | 108922 | 108933 | 108944   | 108960  |        |  |
| T4 NC                  | 000866.4 | (108267) | T--ACTAA     | CAGGCC | CATTAG  | ATATG   | TAAATC | GTTCG  | --CGCTAG | TAGAA   | ATAATC |  |
| SARS-CoV-2 NC_045512.2 | (24326)  | TTGATT   | TGCACA       | CCATT  | TAAATAG | TGCTATT | TGCAAA | ATTCAG | ACTCACT  | TTTC--  | TCCA   |  |
|                        |          |          | Section 1136 |        |         |         |        |        |          |         |        |  |
|                        | (108961) | 108961   | 108966       | 108977 | 108988  | 108999  | 109010 | 109021 | 109032   | 109043  | 109056 |  |
| T4 NC                  | 000866.4 | (108356) | A-TAC        | CAGAA  | GTCT    | CGACTT  | AGATG  | ACCTGA | ACATGT   | AGGTG   | CA-TTT |  |
| SARS-CoV-2 NC_045512.2 | (24418)  | CAAC     | CAAAAT       | GCACA  | AGCTT   | TAAAC   | ACGCT  | TGTTAA | ACAACT   | TAGCTCC | AAATT  |  |
|                        |          |          | Section 1137 |        |         |         |        |        |          |         |        |  |
|                        | (109057) | 109057   | 109065       | 109076 | 109087  | 109098  | 109109 | 109120 | 109131   | 109152  |        |  |
| T4 NC                  | 000866.4 | (108448) | -TTAG        | TTAGAT | TGCTTT  | AT--CA  | GCAAAT | CCTTAT | AC       | TATAC   | TGTAG  |  |
| SARS-CoV-2 NC_045512.2 | (24511)  | TC       | TGACAA       | AGTTG  | AGGCTGA | AGTGCAA | ATAGAT | GAAAA  | AGAAC    | CAAGAA  | TAT    |  |
|                        |          |          | Section 1138 |        |         |         |        |        |          |         |        |  |
|                        | (109153) | 109153   | 109164       | 109175 | 109186  | 109197  | 109208 | 109219 | 109230   | 109248  |        |  |
| T4 NC                  | 000866.4 | (108540) | GGC          | AGGT   | TCGTT   | CA      | GATTT  | GCTGT  | TTTTAT   | TAGGT   | TTAA   |  |
| SARS-CoV-2 NC_045512.2 | (24601)  | TAG      | AGCT         | GCAGAA | ATCA    | GAGCT   | TC     | T-GC   | TAATCT   | TGCT    | GCTAC  |  |
|                        |          |          | Section 1139 |        |         |         |        |        |          |         |        |  |
|                        | (109249) | 109249   | 109263       | 109274 | 109285  | 109296  | 109307 | 109318 | 109329   | 109344  |        |  |
| T4 NC                  | 000866.4 | (108632) | TTAT         | TTAA   | CTTAC   | CAAC    | TCAAT  | CCAG   | CTGG     | ACGA    | AGT    |  |
| SARS-CoV-2 NC_045512.2 | (24688)  | TTG      | TGAA         | AGGG   | --TA    | TCA     | TCTT   | ATG    | TCCT     | -----   | TCC    |  |
|                        |          |          | Section 1140 |        |         |         |        |        |          |         |        |  |
|                        | (109345) | 109345   | 109351       | 109362 | 109373  | 109384  | 109395 | 109406 | 109417   | 109428  | 109440 |  |
| T4 NC                  | 000866.4 | (108728) | TTAGA        | GTAAT  | ACCTT   | CACG    | AGAAG  | TCTT   | CTT      | CCAAAA  | TATCT  |  |
| SARS-CoV-2 NC_045512.2 | (24773)  | CA       | AGAAA        | -GA    | ACTT    | CACAA   | CT-G   | CTC    | CTG      | CCA     | TT-TG  |  |
|                        |          |          | Section 1141 |        |         |         |        |        |          |         |        |  |
|                        | (109441) | 109441   | 109450       | 109461 | 109472  | 109483  | 109494 | 109505 | 109516   | 109536  |        |  |
| T4 NC                  | 000866.4 | (108823) | TTAGA        | AAT    | TAAC    | GTTAT   | TTAC   | GCGG   | TTCAG    | TGTA    | ACCGT  |  |
| SARS-CoV-2 NC_045512.2 | (24863)  | ---      | C-AC         | TG--   | GTT     | TGT     | TAACA  | CAAAG  | GAAT     | TTTT    | TATGA  |  |

## SARS-CoV-2 &amp; T4.apr

|                        |          |                         |              |         |          |          |           |          |              |                  |                            |                       |                             |                     |
|------------------------|----------|-------------------------|--------------|---------|----------|----------|-----------|----------|--------------|------------------|----------------------------|-----------------------|-----------------------------|---------------------|
|                        |          |                         |              |         |          |          |           |          |              | Section 1142     |                            |                       |                             |                     |
|                        | (109537) | 109537                  | 109549       | 109560  | 109571   | 109582   | 109593    | 109604   | 109615       | 109632           |                            |                       |                             |                     |
| T4 NC_000866.4         | (108919) | ATAGGCTTAT              | CAGACTTT     | TCTTTT  | CAC      | TAA      | TTTAGAGT  | TTCTT    | GCATTTAATCGC | TACACGATT        | TCATTACG-AAAGCCAAGAAAG     | GATAACAAGG            |                             |                     |
| SARS-CoV-2 NC_045512.2 | (24948)  | TAA-----                | TAGGAATTGT   | CAACAA  | CAC--    | AG       | TTTAGT    | TCCTT    | TGCAACCTGAAT | TAGAC---         | TCATTCAAGGAGG---           | AGTTAGATAAATA---      |                             |                     |
|                        |          |                         |              |         |          |          |           |          |              | Section 1143     |                            |                       |                             |                     |
|                        | (109633) | 109633                  | 109648       | 109659  | 109670   | 109681   | 109692    | 109703   | 109714       | 109728           |                            |                       |                             |                     |
| T4 NC_000866.4         | (109014) | TTTCAATACATATCTTCAGCAG- | TAAATAC      | TTTC    | GCCTTTTG | CTTC     | GGCATT    | CCAAACG  | CATTTATT     | TGTCATCACTAA     | TCCAGCATGGTCTACTG          |                       |                             |                     |
| SARS-CoV-2 NC_045512.2 | (25027)  | TTTAAAGAAATCATATCA      | CAGAT        | GTGAT   | TTTAG    | GTGACAT  | CTCT      | GGCATT   | AATGCTT      | CAGTTGTAAA       | CATTCAAAAAGAAATTGACCGCTCAA |                       |                             |                     |
|                        |          |                         |              |         |          |          |           |          |              | Section 1144     |                            |                       |                             |                     |
|                        | (109729) | 109729                  | 109736       | 109747  | 109758   | 109769   | 109780    | 109791   | 109802       | 109813 109824    |                            |                       |                             |                     |
| T4 NC_000866.4         | (109109) | TAAAAATTATAATCTTGG      | ACGACAG      | AATCT   | AAATC    | ATTG     | CAATTT    | AATAGC   | TCTTCA       | AATTTACGCGACC    | TAAAAAGTGGAGCCATTTTAAATT   |                       |                             |                     |
| SARS-CoV-2 NC_045512.2 | (25123)  | TGAGGTTGCCA---          | GAA          | T--TTA  | AATGA    | ATCTCT   | ATCTCC    | AAAGAACT | TGGAAAGTA    | TGAGCAGTATA      | TAAAA-TGG--CCATGGTACATT    |                       |                             |                     |
|                        |          |                         |              |         |          |          |           |          |              | Section 1145     |                            |                       |                             |                     |
|                        | (109825) | 109825                  | 109835       | 109846  | 109857   | 109868   | 109879    | 109890   | 109901       | 109920           |                            |                       |                             |                     |
| T4 NC_000866.4         | (109205) | TAAAT--GTATTA           | CAGAA        | TGAT    | CCATCAT  | ATAAT    | CATCT     | ACAT     | AAGT         | CACATCACC        | GCTTTCTGTAGTAA             | CAATAATGTCAAA         | TACATAAAATC                 |                     |
| SARS-CoV-2 NC_045512.2 | (25211)  | TGGCTAGGTT              | TTATAG       | CTGGCTT | -----    | GAT      | TG        | CAT      | AGTAAT       | -GTGACA          | ATTATGCTTT                 | -----GCTGTAG----      |                             |                     |
|                        |          |                         |              |         |          |          |           |          |              | Section 1146     |                            |                       |                             |                     |
|                        | (109921) | 109921                  | 109934       | 109945  | 109956   | 109967   | 109978    | 109989   | 110000       | 110016           |                            |                       |                             |                     |
| T4 NC_000866.4         | (109299) | TTTATCA                 | CAATAATCAACA | TTCTT   | CTGAAT   | GCCAGGTC | CAGCGAATT | CGCCA    | AAGACT       | TGATAAGATACAACCG | CTGAGGTTT                  | CCATTAATATCTTG        |                             |                     |
| SARS-CoV-2 NC_045512.2 | (25288)  | -TTGCTCA                | AGGGCTGTTG   | TTCTT   | GTGAT    | -CCT---  | GCTGCA    | AATT     | TGATGA       | AAG-----         | CGACT-----                 | CTGAG---CAGT-----GCTC |                             |                     |
|                        |          |                         |              |         |          |          |           |          |              | Section 1147     |                            |                       |                             |                     |
|                        | (110017) | 110017                  | 110022       | 110033  | 110044   | 110055   | 110066    | 110077   | 110088       | 110099 110112    |                            |                       |                             |                     |
| T4 NC_000866.4         | (109395) | TACAGCTTTAA             | TGGAAT       | CAGCAT  | AATCTT   | CAAAAT   | AATTTCA   | TACCCA   | AGA-AATCTTCA | GCAGGAAG         | AATCGGTC                   | CAGTGCGTTT            | AGCGCAAG                    |                     |
| SARS-CoV-2 NC_045512.2 | (25358)  | AAAGGAGTC               | AAAT--TA     | CATTAC  | ACAT     | TAAAG    | GAAC      | TTAT     | GGAT         | TGTTT            | ATGAG                      | AATCTTCA              | C-----AATTGGAACTGTAACTTTGAA |                     |
|                        |          |                         |              |         |          |          |           |          |              | Section 1148     |                            |                       |                             |                     |
|                        | (110113) | 110113                  | 110121       | 110132  | 110143   | 110154   | 110165    | 110176   | 110187       | 110208           |                            |                       |                             |                     |
| T4 NC_000866.4         | (109490) | TCACTTT                 | ATCAG        | CTCAA   | TATCAAT  | GAGAAA   | TTTGT     | GCGTGA   | ATCTTTT      | CACGAGCT         | ACC                        | CACTCC                | CACAGTCAATCC                | CAAGCTATAAGTT       |
| SARS-CoV-2 NC_045512.2 | (25445)  | --GTGAA                 | ATCAAG       | GATGC   | TAC      | TCCT     | CAGAT     | -TTTGT   | TCGCGCT      | ACTGCAAC         | GATAC                      | GATA                  | CAAGCCTCAC--TC              | CCTTCGGATGGCTTATTGT |

## SARS-CoV-2 &amp; T4.apr

|                        |          |                                                                                       |                                  |                  |               |                |             |                  |              |              |                 |           |         |            |            |           |           |            |                |           |         |       |          |      |        |     |       |
|------------------------|----------|---------------------------------------------------------------------------------------|----------------------------------|------------------|---------------|----------------|-------------|------------------|--------------|--------------|-----------------|-----------|---------|------------|------------|-----------|-----------|------------|----------------|-----------|---------|-------|----------|------|--------|-----|-------|
|                        |          |                                                                                       |                                  |                  |               |                |             |                  |              | Section 1149 |                 |           |         |            |            |           |           |            |                |           |         |       |          |      |        |     |       |
|                        | (110209) | 110209                                                                                | 110220                           | 110231           | 110242        | 110253         | 110264      | 110275           | 110286       | 110304       |                 |           |         |            |            |           |           |            |                |           |         |       |          |      |        |     |       |
| T4 NC_000866.4         | (109586) | TTTCAATAAATTTAGAGTTGTAAATGATTTTTCAGAGCTGCTATACCTTTTAAACATAAATTAATCCTCAAATGTAAATTTCTAA | CCAA                             | TCACCA           | TCAC          |                |             |                  |              |              |                 |           |         |            |            |           |           |            |                |           |         |       |          |      |        |     |       |
| SARS-CoV-2 NC_045512.2 | (25536)  | TGGGGTTCGACCTTC---                                                                    | TTGCTGTTTTCAGAGCGCTTCCA          | AAATCATAAACCCTCA | AAAAAGAGATGGC | AA--CTAGCACTCT | CCAA        | GGGTGT           | TCAC         |              |                 |           |         |            |            |           |           |            |                |           |         |       |          |      |        |     |       |
|                        |          |                                                                                       |                                  |                  |               |                |             |                  |              | Section 1150 |                 |           |         |            |            |           |           |            |                |           |         |       |          |      |        |     |       |
|                        | (110305) | 110305                                                                                | 110319                           | 110330           | 110341        | 110352         | 110363      | 110374           | 110385       | 110400       |                 |           |         |            |            |           |           |            |                |           |         |       |          |      |        |     |       |
| T4 NC_000866.4         | (109687) | GC                                                                                    | TGATCAGTATTGACTTTAAAGCTGAATCCTTC | TTTCTCTCA        | GCCAAT        | CACC           | AAATTTCTTCT | TGTAATCAATTTATCA | C            | GAGCAATA     | CAATAATAAT      |           |         |            |            |           |           |            |                |           |         |       |          |      |        |     |       |
| SARS-CoV-2 NC_045512.2 | (25627)  | TT                                                                                    | TGTTTGCAACTTGCTGTGTTGT           | TTGTAAACAG       | TTTACTCA      | -----          | CACC        | TTTGTCTCGTT      | -----        | GC           | TGCTGGCCTTGAAGC | CCCTTTCTC |         |            |            |           |           |            |                |           |         |       |          |      |        |     |       |
|                        |          |                                                                                       |                                  |                  |               |                |             |                  |              | Section 1151 |                 |           |         |            |            |           |           |            |                |           |         |       |          |      |        |     |       |
|                        | (110401) | 110401                                                                                | 110407                           | 110418           | 110429        | 110440         | 110451      | 110462           | 110473       | 110484       | 110496          |           |         |            |            |           |           |            |                |           |         |       |          |      |        |     |       |
| T4 NC_000866.4         | (109778) | TAAAAATGTGTTT                                                                         | TAGCTTGTTCAGCTGCTT               | TATTAGCAAGTTCTG  | AAAAAATCTTTA  | ATAAAACA       | CTCTAGCT    | TAAAC            | CTGTTTA      | ---          | CTTTTAA         | TG        |         |            |            |           |           |            |                |           |         |       |          |      |        |     |       |
| SARS-CoV-2 NC_045512.2 | (25711)  | TA                                                                                    | TC----                           | T                | TATGCTT       | AGTCTT         | GCAGAGTATA  | AACTTGTAA        | GAATAATAATG  | AGGCTT       | TGCT--TTG       | CTG       | GAAATGC | CGTTCC     | AAAA       |           |           |            |                |           |         |       |          |      |        |     |       |
|                        |          |                                                                                       |                                  |                  |               |                |             |                  |              | Section 1152 |                 |           |         |            |            |           |           |            |                |           |         |       |          |      |        |     |       |
|                        | (110497) | 110497                                                                                | 110506                           | 110517           | 110528        | 110539         | 110550      | 110561           | 110572       | 110592       |                 |           |         |            |            |           |           |            |                |           |         |       |          |      |        |     |       |
| T4 NC_000866.4         | (109871) | CTTTT                                                                                 | TCGCGTAA                         | TTGATTA          | GC            | AAAAGATT       | CATTTT      | CA               | TAAAGATCATAC | TGTT----     | C               | ATT       | TTT     | ACCTTTT    | AT         | TGATATGT  | CTTT      | TTCTAT     |                |           |         |       |          |      |        |     |       |
| SARS-CoV-2 NC_045512.2 | (25802)  | ACCCAT                                                                                | T----                            | T                | ACTTTAT       | GATG           | CCAACT      | ATT              | TTC          | TTT          | GCTGGC          | ATACTAAT  | TGTT    | ACGA       | CTATT      | GTATACCTT | ACA       | ATAG--TG   | TAACTTTCTTCAAT |           |         |       |          |      |        |     |       |
|                        |          |                                                                                       |                                  |                  |               |                |             |                  |              | Section 1153 |                 |           |         |            |            |           |           |            |                |           |         |       |          |      |        |     |       |
|                        | (110593) | 110593                                                                                | 110605                           | 110616           | 110627        | 110638         | 110649      | 110660           | 110671       | 110688       |                 |           |         |            |            |           |           |            |                |           |         |       |          |      |        |     |       |
| T4 NC_000866.4         | (109962) | AG                                                                                    | ACAACTTTT                        | TTC              | TCGAG         | CC--           | CAT         | AAATACAG         | CC--         | ACTTCTTT     | --              | TG        | CT      | GTAAGTTTAA | TT         | CACG----  | AGCAAT    | TTCAAT     | GAA            | TGACTTTCC |         |       |          |      |        |     |       |
| SARS-CoV-2 NC_045512.2 | (25893)  | T                                                                                     | GT                               | C-AT             | TAC           | TTC            | AGGTG       | GATGG            | CACAA        | CAAGT        | CC              | TATTTCT   | GAACA   | TGACT      | ACCAGATTGG | TGGTT     | TACTG     | AAAAAT     | GGGAAT         | C--TG     | GAGTAAA |       |          |      |        |     |       |
|                        |          |                                                                                       |                                  |                  |               |                |             |                  |              | Section 1154 |                 |           |         |            |            |           |           |            |                |           |         |       |          |      |        |     |       |
|                        | (110689) | 110689                                                                                | 110704                           | 110715           | 110726        | 110737         | 110748      | 110759           | 110770       | 110784       |                 |           |         |            |            |           |           |            |                |           |         |       |          |      |        |     |       |
| T4 NC_000866.4         | (110047) | AGACT                                                                                 | CATGAAGAG                        | TAAACA           | CCACA         | AC             | CTCA        | GTTCT            | CA           | TAAATCAATCT  | CA              | TGT       | TAT     | TCGAG      | TTGGT      | GCCATT    | TATATACAT | TCATT      | TTC            | TGATTG    | TGTT    |       |          |      |        |     |       |
| SARS-CoV-2 NC_045512.2 | (25986)  | AGACT                                                                                 | GTGTTGTAT                        | TACACA           | GT--T         | ACT            | TCACTTC     | AG               | ACTAT        | T--AC        | CAGCT           | TGT       | AC      | TC         | AACTCA     | -----     | ATT       | GAGTACAGAC | ATGG           | TG--TTG   | AACA    |       |          |      |        |     |       |
|                        |          |                                                                                       |                                  |                  |               |                |             |                  |              | Section 1155 |                 |           |         |            |            |           |           |            |                |           |         |       |          |      |        |     |       |
|                        | (110785) | 110785                                                                                | 110792                           | 110803           | 110814        | 110825         | 110836      | 110847           | 110858       | 110869       | 110880          |           |         |            |            |           |           |            |                |           |         |       |          |      |        |     |       |
| T4 NC_000866.4         | (110143) | TTG                                                                                   | TGTGCTT                          | TTCA             | AAATG         | AA             | GGG         | CC               | GAAG         | CC           | CCT             | TAT       | GATT    | ATG        | GAT        | AGGT      | TATAGAT   | GAT        | ACCA           | GT        | TTCT    | AAAGC | AGTT--TT | AT   | GAA--T |     |       |
| SARS-CoV-2 NC_045512.2 | (26073)  | TGT                                                                                   | TACCTT                           | CTCA             | TCTAC         | AA             | TAAA        | ATTG             | TT           | GATGAG       | CCT             | GAAGA     | AC      | ATG        | TCC        | AAATTC    | AC        | CAAT       | CGAC           | GG        | TT      | CATCC | G        | AGTT | GT     | TAT | CCAGT |

## SARS-CoV-2 &amp; T4.apr

|                        |          |              |        |        |        |        |         |        |        |        |                  |      |        |       |        |       |       |         |               |      |       |        |       |      |       |       |      |       |     |       |       |     |      |      |     |      |     |     |     |     |     |       |    |     |    |     |      |       |      |     |   |     |     |   |   |   |     |   |   |   |    |   |
|------------------------|----------|--------------|--------|--------|--------|--------|---------|--------|--------|--------|------------------|------|--------|-------|--------|-------|-------|---------|---------------|------|-------|--------|-------|------|-------|-------|------|-------|-----|-------|-------|-----|------|------|-----|------|-----|-----|-----|-----|-----|-------|----|-----|----|-----|------|-------|------|-----|---|-----|-----|---|---|---|-----|---|---|---|----|---|
|                        |          | Section 1156 |        |        |        |        |         |        |        |        |                  |      |        |       |        |       |       |         |               |      |       |        |       |      |       |       |      |       |     |       |       |     |      |      |     |      |     |     |     |     |     |       |    |     |    |     |      |       |      |     |   |     |     |   |   |   |     |   |   |   |    |   |
|                        | (110881) | 110881       | 110891 | 110902 | 110913 | 110924 | 110935  | 110946 | 110957 | 110976 |                  |      |        |       |        |       |       |         |               |      |       |        |       |      |       |       |      |       |     |       |       |     |      |      |     |      |     |     |     |     |     |       |    |     |    |     |      |       |      |     |   |     |     |   |   |   |     |   |   |   |    |   |
| T4 NC_000866.4         | (110235) | GATGTAATCCA  | TTACGC | GAT    | TCTTG  | GAC    | ATCAACT | TCTGG  | ATAGT  | --CTT  | TTCATCATCTTCTGGA | GAGT | GTAACG | ATGC  | AGTAAT | TATTT | ACTAT | CT      |               |      |       |        |       |      |       |       |      |       |     |       |       |     |      |      |     |      |     |     |     |     |     |       |    |     |    |     |      |       |      |     |   |     |     |   |   |   |     |   |   |   |    |   |
| SARS-CoV-2 NC_045512.2 | (26169)  | AATGGAACCA   | ATTTAT | GAT    | GAACC  | GAC    | GAG     | ACT    | CTAG   | CGT    | G                | CCTT | TGT    | AGCA  | CAAG   | CTG   | ATG-- | AGTACGA | ACTTATGTACTCA | TT   | CGT   | TT     | CG    |      |       |       |      |       |     |       |       |     |      |      |     |      |     |     |     |     |     |       |    |     |    |     |      |       |      |     |   |     |     |   |   |   |     |   |   |   |    |   |
|                        |          | Section 1157 |        |        |        |        |         |        |        |        |                  |      |        |       |        |       |       |         |               |      |       |        |       |      |       |       |      |       |     |       |       |     |      |      |     |      |     |     |     |     |     |       |    |     |    |     |      |       |      |     |   |     |     |   |   |   |     |   |   |   |    |   |
|                        | (110977) | 110977       | 110990 | 111001 | 111012 | 111023 | 111034  | 111045 | 111056 | 111072 |                  |      |        |       |        |       |       |         |               |      |       |        |       |      |       |       |      |       |     |       |       |     |      |      |     |      |     |     |     |     |     |       |    |     |    |     |      |       |      |     |   |     |     |   |   |   |     |   |   |   |    |   |
| T4 NC_000866.4         | (110329) | GGGTC        | GT     | CAG    | T      | TTTCCA | AT-CT   | TTA    | CCTT   | CT     | TCGG             | TC   | ATTTTT | T     | TGG    | ATTT  | CA    | TCCATAA | CCCA          | CC   | AACCG | CAC    | CAG-- | AT   | GTAAG | CTGA  | GCT  | AC    | CG  |       |       |     |      |      |     |      |     |     |     |     |     |       |    |     |    |     |      |       |      |     |   |     |     |   |   |   |     |   |   |   |    |   |
| SARS-CoV-2 NC_045512.2 | (26263)  | GAAGAG       | GA     | CAG    | G      | TACGTT | A       | TAG    | TTA    | ATAG   | G                | GT   | ACT    | TC    | T      | TTTT  | CT    | T       | G             | CTTC | G     | TGG    | TATT  | CTTG | CT    | AGTTA | CAC  | TAG   | CC  | AT    | CCTTA | CTG | C    | GCT  | TC  | GA   |     |     |     |     |     |       |    |     |    |     |      |       |      |     |   |     |     |   |   |   |     |   |   |   |    |   |
|                        |          | Section 1158 |        |        |        |        |         |        |        |        |                  |      |        |       |        |       |       |         |               |      |       |        |       |      |       |       |      |       |     |       |       |     |      |      |     |      |     |     |     |     |     |       |    |     |    |     |      |       |      |     |   |     |     |   |   |   |     |   |   |   |    |   |
|                        | (111073) | 111073       | 111078 | 111089 | 111100 | 111111 | 111122  | 111133 | 111144 | 111155 | 111168           |      |        |       |        |       |       |         |               |      |       |        |       |      |       |       |      |       |     |       |       |     |      |      |     |      |     |     |     |     |     |       |    |     |    |     |      |       |      |     |   |     |     |   |   |   |     |   |   |   |    |   |
| T4 NC_000866.4         | (110422) | TGT          | GGAA   | GAG    | GA     | TGAAC  | AT      | AA     | GGT    | AA     | TT               | CAC  | CT     | TCTGG | TT     | CTGG  | AG    | CA-A    | CTTT          | AGC  | CGT   | GACTGT | TACAT | TACC | AGTT  | TT    | TGGT | AA    | CGG | TT    | AC    | AG  | G    |      |     |      |     |     |     |     |     |       |    |     |    |     |      |       |      |     |   |     |     |   |   |   |     |   |   |   |    |   |
| SARS-CoV-2 NC_045512.2 | (26359)  | TT-          | G      | TGT    | G      | C      | G       | T      | ACT    | GCT    | G                | C    | AA     | TAT   | TG     | TT    | AAC   | GT      | GAGTC         | TT   | G     | T      | AA    | AA   | C     | CTT   | CTTT | T     | T   | TA    | CGT   | TT  | ACTC | T    | CGT | G    | T   | AA  | AA  | A   | T   | CTG-- | AA | TT  | C  | T   | CT   | AG    | A    |     |   |     |     |   |   |   |     |   |   |   |    |   |
|                        |          | Section 1159 |        |        |        |        |         |        |        |        |                  |      |        |       |        |       |       |         |               |      |       |        |       |      |       |       |      |       |     |       |       |     |      |      |     |      |     |     |     |     |     |       |    |     |    |     |      |       |      |     |   |     |     |   |   |   |     |   |   |   |    |   |
|                        | (111169) | 111169       | 111177 | 111188 | 111199 | 111210 | 111221  | 111232 | 111243 | 111264 |                  |      |        |       |        |       |       |         |               |      |       |        |       |      |       |       |      |       |     |       |       |     |      |      |     |      |     |     |     |     |     |       |    |     |    |     |      |       |      |     |   |     |     |   |   |   |     |   |   |   |    |   |
| T4 NC_000866.4         | (110517) | GTT          | A-     | T      | A      | T      | C       | T      | G      | C      | A                | G    | CAG    | TAA   | CAG    | T     | T     | G       | C             | AG   | TAA   | C      | T     | T    | CA    | ATA   | G    | T     | T   | G     | A     | C   | T    | T    | C   | CAAC | AG  | AT  | G   | AGG | T   | AT    | CG | GAC | AG | TAT | AC   | G     | TTAG | TT  | G | ACC | CTT | C | T | A |     |   |   |   |    |   |
| SARS-CoV-2 NC_045512.2 | (26452)  | GTT          | CC     | T      | G      | A      | T       | C      | T      | T      | C                | T    | G      | T     | AA     | A     | C     | ---     | G             | A    | A     | C      | TAA   | A    | T     | A     | T    | A     | T   | T     | ----- | AG  | T    | TTTT | C   | T    | G   | T   | TT  | G   | A   | ACT   | T  | T   | A  | ATT | TTAG | ----- | C    | A   | T | G   | G   |   |   |   |     |   |   |   |    |   |
|                        |          | Section 1160 |        |        |        |        |         |        |        |        |                  |      |        |       |        |       |       |         |               |      |       |        |       |      |       |       |      |       |     |       |       |     |      |      |     |      |     |     |     |     |     |       |    |     |    |     |      |       |      |     |   |     |     |   |   |   |     |   |   |   |    |   |
|                        | (111265) | 111265       | 111276 | 111287 | 111298 | 111309 | 111320  | 111331 | 111342 | 111360 |                  |      |        |       |        |       |       |         |               |      |       |        |       |      |       |       |      |       |     |       |       |     |      |      |     |      |     |     |     |     |     |       |    |     |    |     |      |       |      |     |   |     |     |   |   |   |     |   |   |   |    |   |
| T4 NC_000866.4         | (110612) | CAG          | GAGA   | ---    | A      | GAAT   | CT      | TT     | CTT    | CA     | TGA              | GT   | AG     | T     | A      | TTT   | TGT   | GCT     | T             | CTT  | CT    | GGA    | G     | C    | AC    | CCG   | TAA  | CAT   | TAG | CC    | GT    | AA  | T    | GT   | AG  | CC   | GA  | AG  | CAT | CTT | G   | C-    |    |     |    |     |      |       |      |     |   |     |     |   |   |   |     |   |   |   |    |   |
| SARS-CoV-2 NC_045512.2 | (26527)  | CAG          | A      | T      | T      | C      | CAAC    | G      | T      | A      | CT               | AT   | T      | AC    | C      | GT    | TGA   | AG      | AG            | CT   | T     | A      | AAAA  | -    | GCT   | C     | CTT  | ----- | G   | A     | C     | A   | A    | T    | G   | A    | ACC | TAG | T-- | A   | A   | T     | AG | T   | T  | CC  | T    | ATT   | C--  | CTT | A | C   | A   |   |   |   |     |   |   |   |    |   |
|                        |          | Section 1161 |        |        |        |        |         |        |        |        |                  |      |        |       |        |       |       |         |               |      |       |        |       |      |       |       |      |       |     |       |       |     |      |      |     |      |     |     |     |     |     |       |    |     |    |     |      |       |      |     |   |     |     |   |   |   |     |   |   |   |    |   |
|                        | (111361) | 111361       | 111375 | 111386 | 111397 | 111408 | 111419  | 111430 | 111441 | 111456 |                  |      |        |       |        |       |       |         |               |      |       |        |       |      |       |       |      |       |     |       |       |     |      |      |     |      |     |     |     |     |     |       |    |     |    |     |      |       |      |     |   |     |     |   |   |   |     |   |   |   |    |   |
| T4 NC_000866.4         | (110704) | TGA          | ACAT   | T      | TAAT   | TAGAA  | GG      | AG     | GT     | CA     | ATG              | TAA  | C      | T     | G      | T     | G     | AT      | T             | CAT  | T     | G      | T     | C    | T     | T     | C    | T     | A   | T     | A     | ACC | G    | T    | -   | AAT  | GA  | T   | ACT | T   | C   | ATT   | AG | -   | AG | TAA | C    | G     | C    | T   | T | AG  | T   | G |   |   |     |   |   |   |    |   |
| SARS-CoV-2 NC_045512.2 | (26613)  | TG           | A      | ATT    | T      | G      | T       | C      | T      | CA     | A                | TTT  | G      | C     | T      | ATG   | CC    | A       | C             | AG-- | GA    | A      | T     | AGG  | T     | T     | T    | T     | G   | T     | A     | T   | A    | TTA  | AG  | T    | T   | A   | AT  | T   | T   | C     | T  | C   | T  | G   | G    | C     | T    | G   | T | T   | AT  | G | G | C | A   | G | T | A | CT | T |
|                        |          | Section 1162 |        |        |        |        |         |        |        |        |                  |      |        |       |        |       |       |         |               |      |       |        |       |      |       |       |      |       |     |       |       |     |      |      |     |      |     |     |     |     |     |       |    |     |    |     |      |       |      |     |   |     |     |   |   |   |     |   |   |   |    |   |
|                        | (111457) | 111457       | 111463 | 111474 | 111485 | 111496 | 111507  | 111518 | 111529 | 111540 | 111552           |      |        |       |        |       |       |         |               |      |       |        |       |      |       |       |      |       |     |       |       |     |      |      |     |      |     |     |     |     |     |       |    |     |    |     |      |       |      |     |   |     |     |   |   |   |     |   |   |   |    |   |
| T4 NC_000866.4         | (110798) | CAT          | CAT    | AAT    | TC     | TGT    | CGCG    | GT     | ACT    | TG     | GGC              | TAC  | GCA    | TT    | T      | AATT  | CTT   | T       | T             | ACTC | CAC   | TT     | GT    | AG   | T     | T     | G    | G     | AG  | TAT   | AG    | CT  | AA   | AT   | G   | T    | AG  | AG  | TT  | AG  | TTT | CT    | CC | AC  |    |     |      |       |      |     |   |     |     |   |   |   |     |   |   |   |    |   |
| SARS-CoV-2 NC_045512.2 | (26707)  | T            | A      | G      | CT     | T      | G       | T      | T      | T      | G                | T    | G      | CT    | --     | G     | T     | T       | T             | AC   | AG    | AA     | T     | AA   | AT    | T     | G    | GA    | T   | ----- | CAC   | C   | G    | T    | G   | A    | AT  | T   | G   | C   | A   | T     | G  | G   | C  | T   | T    | G     | T    | T   | G | T   | AG  | G | C | T | --- |   |   |   |    |   |

## SARS-CoV-2 &amp; T4.apr

|                        |          |              |        |           |              |            |           |          |             |          |        |
|------------------------|----------|--------------|--------|-----------|--------------|------------|-----------|----------|-------------|----------|--------|
|                        |          | Section 1163 |        |           |              |            |           |          |             |          |        |
|                        | (111553) | 111553       | 111562 | 111573    | 111584       | 111595     | 111606    | 111617   | 111628      | 111648   |        |
| T4 NC_000866.4         | (110894) | CAACT        | TGTGAA | TCACTACAT | ACCACTGATACG | TAGCAGATGC | TCATCAGGT | TGAGAAGC | TAAAGCAGCAG | TAAATTTG | AAC    |
| SARS-CoV-2 NC_045512.2 | (26791)  | --TGA        | TGTG   | GC        | TCA          | GCTAC      | T         | CA-----  | T           | TGC      | T----- |
|                        |          | Section 1164 |        |           |              |            |           |          |             |          |        |
|                        | (111649) | 111649       | 111661 | 111672    | 111683       | 111694     | 111705    | 111716   | 111727      | 111744   |        |
| T4 NC_000866.4         | (110990) | C            | TCCA   | GCC       | GC           | AGGA       | CTAG      | CA       | GGAG        | T        | TAC    |
| SARS-CoV-2 NC_045512.2 | (26860)  | A            | TCCA   | ---       | GAA          | ---        | CTA       | CA       | TTCT        | T        | CTC    |
|                        |          | Section 1165 |        |           |              |            |           |          |             |          |        |
|                        | (111745) | 111745       | 111760 | 111771    | 111782       | 111793     | 111804    | 111815   | 111826      | 111840   |        |
| T4 NC_000866.4         | (111085) | C            | CT     | ---       | CCTTC        | ---        | AGA       | AAG      | T           | GTATT    | TGT    |
| SARS-CoV-2 NC_045512.2 | (26946)  | G            | CT     | GTGAT     | CCTTC        | GTGG       | ACA       | TCT      | T           | CTATT    | GCT    |
|                        |          | Section 1166 |        |           |              |            |           |          |             |          |        |
|                        | (111841) | 111841       | 111848 | 111859    | 111870       | 111881     | 111892    | 111903   | 111914      | 111925   | 111936 |
| T4 NC_000866.4         | (111171) | A            | GCT    | CCATC     | ---          | TT         | GTGG      | AAC      | ATT         | ATCT     | AC     |
| SARS-CoV-2 NC_045512.2 | (27038)  | A            | TCA    | CGAAC     | GC           | TT         | TCTTA     | TTA      | CAAA        | ATT      | GGG    |
|                        |          | Section 1167 |        |           |              |            |           |          |             |          |        |
|                        | (111937) | 111937       | 111947 | 111958    | 111969       | 111980     | 111991    | 112002   | 112013      | 112032   |        |
| T4 NC_000866.4         | (111263) | T            | TTCA   | ATCAAT    | AAC          | CTGT       | AG        | GTGT     | TT          | TAGG     | AG     |
| SARS-CoV-2 NC_045512.2 | (27132)  | T            | ---    | ATA       | AAT          | TAA        | AC        | ---      | AC          | AG       | ACCA   |
|                        |          | Section 1168 |        |           |              |            |           |          |             |          |        |
|                        | (112033) | 112033       | 112046 | 112057    | 112068       | 112079     | 112090    | 112101   | 112112      | 112128   |        |
| T4 NC_000866.4         | (111359) | T            | TTCA   | CGAATTAA  | AAAC         | TGA        | T         | CA       | TC          | GC       | ATTA   |
| SARS-CoV-2 NC_045512.2 | (27205)  | T            | TTCA   | TCTC      | ---          | GT         | TGA       | ---      | CTT         | TC       | A      |
|                        |          | Section 1169 |        |           |              |            |           |          |             |          |        |
|                        | (112129) | 112129       | 112134 | 112145    | 112156       | 112167     | 112178    | 112189   | 112200      | 112211   | 112224 |
| T4 NC_000866.4         | (111454) | G            | ATT    | TCCA      | ATCA         | AGGAGT     | TC        | AG       | CAATCC      | ATT      | GAT    |
| SARS-CoV-2 NC_045512.2 | (27283)  | A            | ATC    | TTGAT     | T            | ACATCA     | TAA       | ACC      | TCATA       | ATT      | AAA    |

## SARS-CoV-2 &amp; T4.apr

|                        |          |              |                        |                  |                  |                        |                 |                   |                      |                |            |
|------------------------|----------|--------------|------------------------|------------------|------------------|------------------------|-----------------|-------------------|----------------------|----------------|------------|
|                        |          | Section 1170 |                        |                  |                  |                        |                 |                   |                      |                |            |
|                        | (112225) | 112225       | 112233                 | 112244           | 112255           | 112266                 | 112277          | 112288            | 112299               | 112320         |            |
| T4 NC_000866.4         | (111549) | AAAG         | TTTTCCGGAA             | GAGTAAATACAG     | ACGGCTTT         | TCAGATTCAATTAATCTCAGCT | AC--AGCCTG      | TCGAATTTTCTCTCAAC | AAAAGGAGTATC         |                |            |
| SARS-CoV-2 NC_045512.2 | (27372)  | AATG         | GAGATT----             | GATAAACGAACATG   | AAAA             | TTATTCTTTCTGGA         | CAGTGA          | TAACTCGCTAC       | TTGTGAGCTTTTA        | TCACTACC       | AAGAGTGTG  |
|                        |          | Section 1171 |                        |                  |                  |                        |                 |                   |                      |                |            |
|                        | (112321) | 112321       | 112332                 | 112343           | 112354           | 112365                 | 112376          | 112387            | 112398               | 112416         |            |
| T4 NC_000866.4         | (111642) | TTCAATCAAAA  | CATCGGTATTTTTCAGGAATTT | TATCCGT          | TTCTACTACTTCA    | ATTTT                  | AATGTCAG        | ATTTAATC          | G-----               | GAGAAATCAATCAG |            |
| SARS-CoV-2 NC_045512.2 | (27464)  | TTAGAGGTACAA | CAGTACTTTT             | TAAAGAACCTTG     | CTC---           | TTCTGGAACATACG         | AGGGCAATTCACC   | ATTTCATC          | CTCTAGCTGAT          | AAACAATTTG     |            |
|                        |          | Section 1172 |                        |                  |                  |                        |                 |                   |                      |                |            |
|                        | (112417) | 112417       | 112431                 | 112442           | 112453           | 112464                 | 112475          | 112486            | 112497               | 112512         |            |
| T4 NC_000866.4         | (111729) | AAGTG-CTGCT  | CTGG-ATTGACTT--        | CTTCATC--        | GTCATATTTTAA     | TCCCTCTGCGGC           | ATCAGCAGCATC    | --AATTAAGTCTTT    | TAATAGATAAC          |                |            |
| SARS-CoV-2 NC_045512.2 | (27557)  | CACFGACTTGC  | TTAGCACTCAATT          | TGCTTTGCTT       | GTCCTGACGGCGT    | TAAAA                  | CACGTCTATCAGTTA | CGTGCCAGATCAGTT   | TCACCTAA             | ACTGT          |            |
|                        |          | Section 1173 |                        |                  |                  |                        |                 |                   |                      |                |            |
|                        | (112513) | 112513       | 112519                 | 112530           | 112541           | 112552                 | 112563          | 112574            | 112585               | 112596         | 112608     |
| T4 NC_000866.4         | (111817) | CCATCAGTCT   | CTGTCATAGGTTCACTAG     | GAGCTTCTGGAGGGC  | TTCTTCAA         | -TATCAA                | CAACGATATTATC   | AAAAGATTTAT       | TTC                  | TTTTTGTACCTT   |            |
| SARS-CoV-2 NC_045512.2 | (27653)  | TCAATCAGAC   | A--AGAGGAAGTTCA        | AGAAC            | TTTACTCTCCAA     | ATTTTCTCTTATTG         | TGCGGCAATAGTG   | TTTATAAACACTTT    | TGCTTC               | ACACTCAAAAG    |            |
|                        |          | Section 1174 |                        |                  |                  |                        |                 |                   |                      |                |            |
|                        | (112609) | 112609       | 112618                 | 112629           | 112640           | 112651                 | 112662          | 112673            | 112684               | 112704         |            |
| T4 NC_000866.4         | (111912) | TATACCAAA    | CTGTTCA                | GATATTCAGCTAATTT | TAGCTTTAGCTTCTTT | TGTTATCAT              | CAAGAGCCTTCAGC  | TCTGCA            | ATATAATCTTTATCTATCAT |                |            |
| SARS-CoV-2 NC_045512.2 | (27747)  | AAAGACAGAA   | TGAT-TGA               | ACTTTCAT-TAATTG  | ACTTCTATT        | TGTGCTTTT              | ---T---         | AGCCTT---         | TCTGCTA              | -----          |            |
|                        |          | Section 1175 |                        |                  |                  |                        |                 |                   |                      |                |            |
|                        | (112705) | 112705       | 112717                 | 112728           | 112739           | 112750                 | 112761          | 112772            | 112783               | 112800         |            |
| T4 NC_000866.4         | (112008) | AATATTTCC    | TCAGTATAAA             | TATAGATATATTTAT  | TACTCGGAAAA      | TAGTATGT               | TACCAC          | TTTGTATA          | TGAAACAACAAATC       | -TAATAAATGGTAA | AAATGTTGTA |
| SARS-CoV-2 NC_045512.2 | (27810)  | -----TTCC    | -----                  | TTGTTTAAATTA     | TGCT-----        | TATATATCTTTTGG         | TTCTCACT        | TGAACTGCAAGATC    | ATAATGAA             | ACTTGTCATA     |            |
|                        |          | Section 1176 |                        |                  |                  |                        |                 |                   |                      |                |            |
|                        | (112801) | 112801       | 112816                 | 112827           | 112838           | 112849                 | 112860          | 112871            | 112882               | 112896         |            |
| T4 NC_000866.4         | (112103) | AGTATATAG    | GAAAGCACTCTACT         | GATGAC           | TTGAATGAT        | TGGTTACCTTGG           | TTCGGTAC        | GCAATTCAG         | GCTATAAA             | GAAATATGGTGA   | AAAC       |
| SARS-CoV-2 NC_045512.2 | (27881)  | CGCC         | TAAACGAA--             | CATGAAATTTCT     | TGTTT            | ---TCTTAGGAATCAT       | CACAACTGTAGCT   | GCATTTCA          | CAAGAAATG-----       | TAGTTTACAGTC   |            |



## SARS-CoV-2 &amp; T4.apr

|                        |          |                                                                                                        |        |        |        |        |        |        |        |               |
|------------------------|----------|--------------------------------------------------------------------------------------------------------|--------|--------|--------|--------|--------|--------|--------|---------------|
|                        |          |                                                                                                        |        |        |        |        |        |        |        | Section 1177  |
|                        | (112897) | 112897                                                                                                 | 112904 | 112915 | 112926 | 112937 | 112948 | 112959 | 112970 | 112981 112992 |
| T4 NC_000866.4         | (112198) | AATTTCTCTAGAACAAATACATAAAAGAGTTTAAAACTTCGAAGAAGCGTACATGTATGAAGAAAGAAATATTAATCTCCTGAACATAATAAAAAAGCAAA  |        |        |        |        |        |        |        |               |
| SARS-CoV-2 NC_045512.2 | (27965)  | ATGTACTCAACATCA--ACCATATGTAGTTGATGACCCTGTCTCTATTCACATCTATCTATAAATGGTAATTAAGAGTAGGAGCTAG-AAAAATCAGC     |        |        |        |        |        |        |        |               |
|                        |          |                                                                                                        |        |        |        |        |        |        |        | Section 1178  |
|                        | (112993) | 112993                                                                                                 | 113003 | 113014 | 113025 | 113036 | 113047 | 113058 | 113069 | 113088        |
| T4 NC_000866.4         | (112794) | AATTATTATTAATATGAAACCTGGTGGATTGTTGGAAATGTATTGACTACAGATGTATAGCAAGATGAAAGAAATCTTCGCTAAAAGATTGAA          |        |        |        |        |        |        |        |               |
| SARS-CoV-2 NC_045512.2 | (28058)  | ACCTTTAATTGAAATGTGCGTGGATGAG---GCTGGTCTAAATCAC-CATTTCAGTACATCGATATCAGGT--AATTAATAC-----AGTTT--         |        |        |        |        |        |        |        |               |
|                        |          |                                                                                                        |        |        |        |        |        |        |        | Section 1179  |
|                        | (113089) | 113089                                                                                                 | 113102 | 113113 | 113124 | 113135 | 113146 | 113157 | 113168 | 113184        |
| T4 NC_000866.4         | (112390) | AACTCACC GGCGACGGTATTAGGTAAAACTTGTATACTAATGGAACATAAAAAATTTTATTATTAA-ACCTGGAGAACTTGTTCAGAAAGGATTTGT     |        |        |        |        |        |        |        |               |
| SARS-CoV-2 NC_045512.2 | (28138)  | ----C-CTGTTTACCTTT-----TACAA-----TTAATTGCCAGGAAC-----CTAAATTTGGGTAGT-CTGTAGTGCCTTGTTC-----G---TTCT     |        |        |        |        |        |        |        |               |
|                        |          |                                                                                                        |        |        |        |        |        |        |        | Section 1180  |
|                        | (113185) | 113185                                                                                                 | 113190 | 113201 | 113212 | 113223 | 113234 | 113245 | 113256 | 113267 113280 |
| T4 NC_000866.4         | (112485) | AAAAAGGATGGTTCAATCCATAAGAAAGTCCAGAAAAAGGATGTAAAGTCAACCCGACACACAGGAACCTTTTGGGTCAATAATGGCGCAATAAA        |        |        |        |        |        |        |        |               |
| SARS-CoV-2 NC_045512.2 | (28207)  | ATGAAG-ACTTTTATAGAGTATCATGACGTTCGTGTTGTTTAGATTTCATCTAAACGAAACAACACTAAAAATGCTG----ATAATGGACCCCAAAA      |        |        |        |        |        |        |        |               |
|                        |          |                                                                                                        |        |        |        |        |        |        |        | Section 1181  |
|                        | (113281) | 113281                                                                                                 | 113289 | 113300 | 113311 | 113322 | 113333 | 113344 | 113355 | 113376        |
| T4 NC_000866.4         | (112581) | TAAA-TTAAATACAAACAGACGGTATTATTTCCC GACGGATTTATTAAAGGTCGTCTCATGAAAAGAGATTCTAAAGGCAAAATTTAGTAAAGGCATAAT  |        |        |        |        |        |        |        |               |
| SARS-CoV-2 NC_045512.2 | (28297)  | TACGCGA AATGCAACCCGCATTACGTTTGGTG GACCTCAGATTCAAC-TGGCA----GTAAACAGA-----ATGGAGAACGCAGTGGGGCG-----     |        |        |        |        |        |        |        |               |
|                        |          |                                                                                                        |        |        |        |        |        |        |        | Section 1182  |
|                        | (113377) | 113377                                                                                                 | 113388 | 113399 | 113410 | 113421 | 113432 | 113443 | 113454 | 113472        |
| T4 NC_000866.4         | (112676) | TATG GATATTAAAGTACATTTTCAAG-ACCTTCA GTCATGTACGCATCGATT--GTGAAGAGAGCACGTTCCACGAATTAAAGAGATTTCTT---TTC   |        |        |        |        |        |        |        |               |
| SARS-CoV-2 NC_045512.2 | (28379)  | ---C GATCAAACAACGTCGGCCCAAGGTTTACC CAATAATACTGCGTCTTGTTCAACCGCTCTCAC TCAACATGGCAAGGAAGACCTTAAATTC      |        |        |        |        |        |        |        |               |
|                        |          |                                                                                                        |        |        |        |        |        |        |        | Section 1183  |
|                        | (113473) | 113473                                                                                                 | 113487 | 113498 | 113509 | 113520 | 113531 | 113542 | 113553 | 113568        |
| T4 NC_000866.4         | (112766) | GT TTGAGG CCGATGGATATAGATTTAAATCTCGCTTCAGATATGGCAAC TGGGATGGACGAATCCGTCTTTT AGATTATAATC GTCTTC TTCATTT |        |        |        |        |        |        |        |               |
| SARS-CoV-2 NC_045512.2 | (28472)  | CC TC GAGGA-CAAGGCGTTCCAATTAAACACCAATAGCAGTCCAGATGACCAAAT TGGCTACTA CCGA-----AG-AGCTACCA GACGAATTCG-TG |        |        |        |        |        |        |        |               |

## SARS-CoV-2 &amp; T4.apr

|                        |          |              |         |        |        |        |        |        |        |        |        |   |     |     |      |      |     |      |    |      |       |      |      |     |    |       |     |      |      |      |    |
|------------------------|----------|--------------|---------|--------|--------|--------|--------|--------|--------|--------|--------|---|-----|-----|------|------|-----|------|----|------|-------|------|------|-----|----|-------|-----|------|------|------|----|
|                        |          | Section 1184 |         |        |        |        |        |        |        |        |        |   |     |     |      |      |     |      |    |      |       |      |      |     |    |       |     |      |      |      |    |
|                        | (113569) | 113569       | 113575  | 113586 | 113597 | 113608 | 113619 | 113630 | 113641 | 113652 | 113664 |   |     |     |      |      |     |      |    |      |       |      |      |     |    |       |     |      |      |      |    |
| T4 NC_000866.4         | (112862) | CG           | GCTTAGT | CGG    | GC     | AAAT   | TAAAA  | AAT    | TC     | TGT    | GAT    | A | -AT | TTT | TGGC | TATA | AAG | CCT  | GG | --AT | TGAC  | CCAC | AAAT | TAA | C  | GAAAA | GGA | AT   | -TAT | CAA  |    |
| SARS-CoV-2 NC_045512.2 | (28560)  | GT           | G       | G      | T      | G      | A      | --     | CGG    | T      | A      | A | A   | T   | G    | A    | A   | A    | A  | T    | C     | A    | G    | T   | C  | A     | G   | T    | C    | A    |    |
|                        |          | Section 1185 |         |        |        |        |        |        |        |        |        |   |     |     |      |      |     |      |    |      |       |      |      |     |    |       |     |      |      |      |    |
|                        | (113665) | 113665       | 113674  | 113685 | 113696 | 113707 | 113718 | 113729 | 113740 | 113760 |        |   |     |     |      |      |     |      |    |      |       |      |      |     |    |       |     |      |      |      |    |
| T4 NC_000866.4         | (112954) | GA           | AAAGA   | TTTT   | GAT    | GAA    | TG     | GC     | TT     | T      | C      | T | A   | A   | T    | T    | A   | G    | A  | A    | T     | C    | T    | A   | T  | T     | C   | A    | A    | G    |    |
| SARS-CoV-2 NC_045512.2 | (28650)  | AC           | AAAGA   | CGGC   | AT     | CAT    | AT     | GG     | G      | T      | T      | G | C   | -AA | C    | T    | G   | A    | G  | G    | A     | G    | C    | T   | G  | A     | T   | A    | C    | A    |    |
|                        |          | Section 1186 |         |        |        |        |        |        |        |        |        |   |     |     |      |      |     |      |    |      |       |      |      |     |    |       |     |      |      |      |    |
|                        | (113761) | 113761       | 113773  | 113784 | 113795 | 113806 | 113817 | 113828 | 113839 | 113856 |        |   |     |     |      |      |     |      |    |      |       |      |      |     |    |       |     |      |      |      |    |
| T4 NC_000866.4         | (113050) | GAT          | TAG     | TTA    | AT     | CGT    | CG     | TAG    | AA     | -TT    | C      | T | T   | A   | A    | T    | C   | T    | T  | C    | CA    | AC   | AT   | CT  | G  | CA    | GG  | T    | AAA  | ATTA |    |
| SARS-CoV-2 NC_045512.2 | (28736)  | G            | C       | T      | --     | GC     | AA     | T      | CGT    | GC     | T      | A | CAA | C   | T    | T    | C   | T    | C  | A    | AG    | AA   | CA   | AC  | AT | TG    | C   | A    | --   | AAA  |    |
|                        |          | Section 1187 |         |        |        |        |        |        |        |        |        |   |     |     |      |      |     |      |    |      |       |      |      |     |    |       |     |      |      |      |    |
|                        | (113857) | 113857       | 113872  | 113883 | 113894 | 113905 | 113916 | 113927 | 113938 | 113952 |        |   |     |     |      |      |     |      |    |      |       |      |      |     |    |       |     |      |      |      |    |
| T4 NC_000866.4         | (113144) | TGA          | AG      | G      | T      | AA     | A      | A      | T      | T      | C      | T | A   | T   | C    | A    | T   | T    | G  | T    | T     | C    | A    | A   | C  | A     | C   | T    | G    | C    | T  |
| SARS-CoV-2 NC_045512.2 | (28811)  | --           | AG      | T      | C      | AA     | --     | G      | C      | T      | C      | T | T   | C   | G    | T    | T   | C    | C  | --   | --    | --   | --   | --  | -- | --    | --  | --   | --   | --   | -- |
|                        |          | Section 1188 |         |        |        |        |        |        |        |        |        |   |     |     |      |      |     |      |    |      |       |      |      |     |    |       |     |      |      |      |    |
|                        | (113953) | 113953       | 113960  | 113971 | 113982 | 113993 | 114004 | 114015 | 114026 | 114037 | 114048 |   |     |     |      |      |     |      |    |      |       |      |      |     |    |       |     |      |      |      |    |
| T4 NC_000866.4         | (113240) | AA           | AG      | AAAA   | TT     | G      | T      | G      | C      | G      | G      | A | G   | C   | A    | T    | C   | AAAA | G  | A    | T     | G    | A    | A   | A  | T     | A   | AAAA | CA   | ACCG |    |
| SARS-CoV-2 NC_045512.2 | (28872)  | GC           | AG      | ----   | CA     | G      | T      | A      | G      | G      | G      | A | A   | C   | T    | C    | T   | C    | T  | G    | ----- | C    | T    | A   | G  | A     | A   | T    | G    | C    |    |
|                        |          | Section 1189 |         |        |        |        |        |        |        |        |        |   |     |     |      |      |     |      |    |      |       |      |      |     |    |       |     |      |      |      |    |
|                        | (114049) | 114049       | 114059  | 114070 | 114081 | 114092 | 114103 | 114114 | 114125 | 114144 |        |   |     |     |      |      |     |      |    |      |       |      |      |     |    |       |     |      |      |      |    |
| T4 NC_000866.4         | (113336) | A            | GA      | AT     | G      | G      | T      | T      | C      | T      | C      | A | C   | A   | G    | T    | T   | G    | A  | A    | T     | G    | A    | A   | T  | G     | A   | A    | T    | G    | A  |
| SARS-CoV-2 NC_045512.2 | (28946)  | -            | GA      | CA     | GA     | TT     | GA     | AC     | C      | A      | G      | C | A   | A   | A    | T    | G   | T    | C  | T    | G     | A    | G    | C   | A  | A     | A   | T    | G    | A    | A  |
|                        |          | Section 1190 |         |        |        |        |        |        |        |        |        |   |     |     |      |      |     |      |    |      |       |      |      |     |    |       |     |      |      |      |    |
|                        | (114145) | 114145       | 114158  | 114169 | 114180 | 114191 | 114202 | 114213 | 114224 | 114240 |        |   |     |     |      |      |     |      |    |      |       |      |      |     |    |       |     |      |      |      |    |
| T4 NC_000866.4         | (113432) | C            | A       | T      | G      | T      | T      | C      | A      | A      | A      | T | T   | C   | A    | A    | A   | T    | T  | C    | A     | A    | A    | T   | T  | C     | A   | A    | A    | T    | T  |
| SARS-CoV-2 NC_045512.2 | (29025)  | C            | T       | G      | C      | T      | G      | A      | G      | G      | C      | T | T   | C   | A    | A    | A   | T    | T  | C    | A     | A    | A    | T   | T  | C     | A   | A    | A    | T    | T  |

## SARS-CoV-2 & T4.apr

|                       |          |              |        |         |         |         |        |        |         |        |         |         |       |        |        |       |        |       |        |         |        |       |        |      |     |      |     |      |      |      |      |      |     |     |     |      |     |     |     |     |     |      |    |    |   |   |     |   |    |   |    |
|-----------------------|----------|--------------|--------|---------|---------|---------|--------|--------|---------|--------|---------|---------|-------|--------|--------|-------|--------|-------|--------|---------|--------|-------|--------|------|-----|------|-----|------|------|------|------|------|-----|-----|-----|------|-----|-----|-----|-----|-----|------|----|----|---|---|-----|---|----|---|----|
|                       |          | Section 1191 |        |         |         |         |        |        |         |        |         |         |       |        |        |       |        |       |        |         |        |       |        |      |     |      |     |      |      |      |      |      |     |     |     |      |     |     |     |     |     |      |    |    |   |   |     |   |    |   |    |
|                       | (114241) | 114241       | 114246 | 114257  | 114268  | 114279  | 114290 | 114301 | 114312  | 114323 | 114336  |         |       |        |        |       |        |       |        |         |        |       |        |      |     |      |     |      |      |      |      |      |     |     |     |      |     |     |     |     |     |      |    |    |   |   |     |   |    |   |    |
| T4 NC 000866.4        | (113521) | CAGTAA       | CGACTT | TCTAAT  | ATTAAT  | TGGAAG  | TATG   | GACAAG | TAACTG  | AG-CT  | AAAAATT | TAATAG  | TATT  | TTTCTT | CGCTAT | CCC   | GATGAG | TTCA  | CTACT  | TAA     |        |       |        |      |     |      |     |      |      |      |      |      |     |     |     |      |     |     |     |     |     |      |    |    |   |   |     |   |    |   |    |
| SARS-CoV-2 NC_04512.2 | (29121)  | AAGGAA       | ATTTT  | TGGGAC  | CCAGGA  | AACTAAT | CA     | GACAAG | GAACTGA | TTAC   | AAAC    | ATTGGCC | GCAAA | TTG    | CACAAT | TGCCC | CCAGCG | TTCA  | GC     | TCT     |        |       |        |      |     |      |     |      |      |      |      |      |     |     |     |      |     |     |     |     |     |      |    |    |   |   |     |   |    |   |    |
| Section 1192          |          |              |        |         |         |         |        |        |         |        |         |         |       |        |        |       |        |       |        |         |        |       |        |      |     |      |     |      |      |      |      |      |     |     |     |      |     |     |     |     |     |      |    |    |   |   |     |   |    |   |    |
|                       | (114337) | 114337       | 114345 | 114356  | 114367  | 114378  | 114389 | 114400 | 114411  | 114432 |         |         |       |        |        |       |        |       |        |         |        |       |        |      |     |      |     |      |      |      |      |      |     |     |     |      |     |     |     |     |     |      |    |    |   |   |     |   |    |   |    |
| T4 NC 000866.4        | (113615) | ATTAAG       | GGA    | AAAAAC  | TTAC    | CAAG    | AA     | GAAAT  | TAA     | AAT    | TATTACT | GGGCT   | TAGT  | AA     | AAGAA  | AATAA | AATG   | GATCG | CTAA   | ATTAGCT | TATTAG | CT-TG | CGC    |      |     |      |     |      |      |      |      |      |     |     |     |      |     |     |     |     |     |      |    |    |   |   |     |   |    |   |    |
| SARS-CoV-2 NC_04512.2 | (29217)  | TCGG         | AA     | TG      | TCGCGCA | TTGG    | CATG   | --     | GAA     | GT     | CA      | ACCT    | TCGG  | --     | GAA    | CGT   | GT     | TG    | ACCT   | ACAC    | A---   | G---  | GTGCC  | ATCA | AA  | TGG  | ATG | ACAA | AGAT |      |      |      |     |     |     |      |     |     |     |     |     |      |    |    |   |   |     |   |    |   |    |
| Section 1193          |          |              |        |         |         |         |        |        |         |        |         |         |       |        |        |       |        |       |        |         |        |       |        |      |     |      |     |      |      |      |      |      |     |     |     |      |     |     |     |     |     |      |    |    |   |   |     |   |    |   |    |
|                       | (114433) | 114433       | 114444 | 114455  | 114466  | 114477  | 114488 | 114499 | 114510  | 114528 |         |         |       |        |        |       |        |       |        |         |        |       |        |      |     |      |     |      |      |      |      |      |     |     |     |      |     |     |     |     |     |      |    |    |   |   |     |   |    |   |    |
| T4 NC 000866.4        | (113710) | AA           | AAA    | GATG    | AAA     | ACG     | CTTT   | TG     | TCAT    | TGTT   | TAA     | CAT     | GTAT  | CGCAT  | GTAA   | AGCT  | ATTTT  | C     | GATTT  | TA      | TTAAA  | ATGA  | AT     | ACG  | TAA | AG   | TTT | ATT  | ACG  |      |      |      |     |     |     |      |     |     |     |     |     |      |    |    |   |   |     |   |    |   |    |
| SARS-CoV-2 NC_04512.2 | (29303)  | CC           | AAA    | TTT     | C       | AAA     | GAT    | CAAG   | T       | CATT   | T       | TGC     | T     | GAA    | T      | AAG   | C      | AT    | ATT    | GAC     | G      | CA    | T      | ACAA | A   | ---  | C   | AT   | TCCC | ACC  | AA   | CA   | GAG | CCT | --- | AAA  | AG  | GAC | AAA | AG  |     |      |    |    |   |   |     |   |    |   |    |
| Section 1194          |          |              |        |         |         |         |        |        |         |        |         |         |       |        |        |       |        |       |        |         |        |       |        |      |     |      |     |      |      |      |      |      |     |     |     |      |     |     |     |     |     |      |    |    |   |   |     |   |    |   |    |
|                       | (114529) | 114529       | 114543 | 114554  | 114565  | 114576  | 114587 | 114598 | 114609  | 114624 |         |         |       |        |        |       |        |       |        |         |        |       |        |      |     |      |     |      |      |      |      |      |     |     |     |      |     |     |     |     |     |      |    |    |   |   |     |   |    |   |    |
| T4 NC 000866.4        | (113806) | T            | ATC    | AGG     | GGAA    | GT      | TGA    | TAC    | CG      | AA     | CC      | CGC     | A     | TAT    | AAT    | GAA   | A      | ACCTT | AG     | CT      | G      | AAA   | TG     | GT   | A   | AGG  | AAT | TAA  | TT   | ATAG | TAG  | GC   | TAG | TT  | AT  | GG   | T   | TAT | TTT |     |     |      |    |    |   |   |     |   |    |   |    |
| SARS-CoV-2 NC_04512.2 | (29393)  | A            | GA     | AGG     | --      | CT      | GA     | TGA    | AAC     | TC     | AAG     | CC      | TT    | --     | AC     | CGC   | AGA    | GAC   | A      | GAA     | GA     | AA    | AA     | CA   | CT  | GT   | G   | A    | --   | CTC  | TTC  | TT   | CCT | GCT | GC  | AGAT | TT  | TG  | GAT | G   | --  | ATTT |    |    |   |   |     |   |    |   |    |
| Section 1195          |          |              |        |         |         |         |        |        |         |        |         |         |       |        |        |       |        |       |        |         |        |       |        |      |     |      |     |      |      |      |      |      |     |     |     |      |     |     |     |     |     |      |    |    |   |   |     |   |    |   |    |
|                       | (114625) | 114625       | 114631 | 114642  | 114653  | 114664  | 114675 | 114686 | 114697  | 114708 | 114720  |         |       |        |        |       |        |       |        |         |        |       |        |      |     |      |     |      |      |      |      |      |     |     |     |      |     |     |     |     |     |      |    |    |   |   |     |   |    |   |    |
| T4 NC 000866.4        | (113902) | CT           | A      | CTGGT   | A       | TT      | CAGTT  | AAA    | AAT     | CT     | TG      | CAT     | C     | AGT    | T      | GT    | TTT    | TAG   | C      | G       | CAC    | GGT   | GT     | TAA  | AAT | C    | AA  | AA   | TCAT | T    | G    | T    | TA  | CA  | AA  | TC   | G   | T   | CG  | TG  | TAT | TA   |    |    |   |   |     |   |    |   |    |
| SARS-CoV-2 NC_04512.2 | (29482)  | CT           | C      | AAAC    | A       | ATT     | G      | --     | C       | AA     | CAATC   | --      | CAT   | G      | A      | G     | CA     | GT    | G      | C       | T      | G     | A      | CT   | C   | A    | C   | ---  | T    | AGG  | C    | T    | A   | A   | C   | TCAT | G   | C   | A   | G   | AC  | CA   | CA | AG | G | C | AGA | T | GG | C | TA |
| Section 1196          |          |              |        |         |         |         |        |        |         |        |         |         |       |        |        |       |        |       |        |         |        |       |        |      |     |      |     |      |      |      |      |      |     |     |     |      |     |     |     |     |     |      |    |    |   |   |     |   |    |   |    |
|                       | (114721) | 114721       | 114730 | 114741  | 114752  | 114763  | 114774 | 114785 | 114796  | 114816 |         |         |       |        |        |       |        |       |        |         |        |       |        |      |     |      |     |      |      |      |      |      |     |     |     |      |     |     |     |     |     |      |    |    |   |   |     |   |    |   |    |
| T4 NC 000866.4        | (113997) | CG           | TAA    | G       | CAT     | TGG     | TT     | CTAAG  | CAAT    | TAG    | C       | --      | AA    | CAGT   | CT     | TGG   | GAC    | CT    | CAT    | AG      | ATAG   | ATAG  | C      | G    | CAG | GC   | GT  | CA   | AG   | CC   | AA   | AAT  | CT  | G   | CT  | A    | TAC | G   | AAA | AG  | AA  | TAT  | G  |    |   |   |     |   |    |   |    |
| SARS-CoV-2 NC_04512.2 | (29566)  | TA           | TAA    | A       | CG      | T       | --     | TT     | -----   | T      | CG      | TTTT    | C     | GT     | T      | TAC   | GAT    | AT    | ATAG   | TCTA    | C      | T     | TT     | GT   | G   | CAG  | AAT | G    | AA   | TT   | CTC  | G    | TAA | C   | PAC | ATA  | AG  | CA  | AG  | TAG | A   |      |    |    |   |   |     |   |    |   |    |
| Section 1197          |          |              |        |         |         |         |        |        |         |        |         |         |       |        |        |       |        |       |        |         |        |       |        |      |     |      |     |      |      |      |      |      |     |     |     |      |     |     |     |     |     |      |    |    |   |   |     |   |    |   |    |
|                       | (114817) | 114817       | 114829 | 114840  | 114851  | 114862  | 114873 | 114884 | 114895  | 114912 |         |         |       |        |        |       |        |       |        |         |        |       |        |      |     |      |     |      |      |      |      |      |     |     |     |      |     |     |     |     |     |      |    |    |   |   |     |   |    |   |    |
| T4 NC 000866.4        | (114091) | TTC          | A      | TTTGAAC | TAT     | CTTT    | T      | AAA    | --      | CA     | CG      | GCA     | T     | TGAT   | TCG    | TAT   | TCAG   | C     | GCTACG | CAGAT   | GAA    | AAA   | TTTT   | A    | TT  | ACGT | AAT | G    | AAA  | ACA  | GTTA | ATTT | AAT |     |     |      |     |     |     |     |     |      |    |    |   |   |     |   |    |   |    |
| SARS-CoV-2 NC_04512.2 | (29650)  | TGT          | A      | G       | ----    | T       | TAA    | CTTT   | AA      | TCTCA  | CATAG   | GCA     | T     | CTT    | --     | TAA   | TCAG   | T     | GTGTA  | CATT    | --     | A     | GGGAGG | ACTT | G   | AA   | GAG | CCA  | CCA  | ---  | C    | ATTT | T   | --  |     |      |     |     |     |     |     |      |    |    |   |   |     |   |    |   |    |

## SARS-CoV-2 &amp; T4.apr

|                        |          |                                                                                                    |        |        |        |        |        |        |        |        |        |
|------------------------|----------|----------------------------------------------------------------------------------------------------|--------|--------|--------|--------|--------|--------|--------|--------|--------|
|                        |          | Section 1198                                                                                       |        |        |        |        |        |        |        |        |        |
|                        | (114913) | 114913                                                                                             | 114928 | 114939 | 114950 | 114961 | 114972 | 114983 | 114994 | 115008 |        |
| T4 NC_000866.4         | (114185) | AAGCTTCGGCCCTTTGAGAGAAAGATGTTACTAGAAATTAAACAATTTCCTTTATGAGCTTCTATTGATGAA---TTATGGGTAAAATTGCC       |        |        |        |        |        |        |        |        |        |
| SARS-CoV-2 NC_045512.2 | (29730)  | CACCGAGGCCAC---GCGAGTACGATCG-AGTGTAACAGTGAACAATGCTAGGGAAGAGCTGCCTATTATGGAAGAGCCCTAATGTGTAAAATTAAAT |        |        |        |        |        |        |        |        |        |
|                        |          | Section 1199                                                                                       |        |        |        |        |        |        |        |        |        |
|                        | (115009) | 115009                                                                                             | 115016 | 115027 | 115038 | 115049 | 115060 | 115071 | 115082 | 115093 | 115104 |
| T4 NC_000866.4         | (114277) | CTTGTC-AAACATTAGAAAGGTTTAGAAGAACTTGAAGCTTATTATAA-GAAAGAGTCAAAGAAACTGAATTAAAAGATACTGATGACATCTCTGT   |        |        |        |        |        |        |        |        |        |
| SARS-CoV-2 NC_045512.2 | (29822)  | TAGTAGTGCTATCCCCA--TGTGATTTTATAGCTTCTTAGGAGAAATGACAAAGAAAAGAAAAGAAAAGAAAAGAAAAGAAAAGAAAAGAAAAG     |        |        |        |        |        |        |        |        |        |
|                        |          | Section 1200                                                                                       |        |        |        |        |        |        |        |        |        |
|                        | (115105) | 115105                                                                                             | 115115 | 115126 | 115137 | 115148 | 115159 | 115170 | 115181 | 115200 |        |
| T4 NC_000866.4         | (114371) | GAGAGATGCTTTGGCAGGAAAAAGAGCTGAATTAGAAGATTCAGACGATGAAGTAGAAGAAAGCTTTTAAATTAAAAAAGGCCCAACCAAAAAGGA   |        |        |        |        |        |        |        |        |        |
| SARS-CoV-2 NC_045512.2 | (29904)  | -----                                                                                              |        |        |        |        |        |        |        |        |        |
|                        |          | Section 1201                                                                                       |        |        |        |        |        |        |        |        |        |
|                        | (115201) | 115201                                                                                             | 115214 | 115225 | 115236 | 115247 | 115258 | 115269 | 115280 | 115296 |        |
| T4 NC_000866.4         | (114467) | AGGGCCAAAACATATAGACTAAAGGTCACACTATAGCAAAAGTTGTGTTTCATTTAATTGTTCTTCCGAACCTTTCTGAACTGGTAGTTCTTTAATG  |        |        |        |        |        |        |        |        |        |
| SARS-CoV-2 NC_045512.2 | (29904)  | -----                                                                                              |        |        |        |        |        |        |        |        |        |
|                        |          | Section 1202                                                                                       |        |        |        |        |        |        |        |        |        |
|                        | (115297) | 115297                                                                                             | 115302 | 115313 | 115324 | 115335 | 115346 | 115357 | 115368 | 115379 | 115392 |
| T4 NC_000866.4         | (114563) | TAATTATAGCAAGGCCAGGATGTACAGGACCTTTGTCTGTTTCAACAACCAATGCAGAATCGATTGGAGTTTACAGACAACACAAATCTTATCT     |        |        |        |        |        |        |        |        |        |
| SARS-CoV-2 NC_045512.2 | (29904)  | -----                                                                                              |        |        |        |        |        |        |        |        |        |
|                        |          | Section 1203                                                                                       |        |        |        |        |        |        |        |        |        |
|                        | (115393) | 115393                                                                                             | 115401 | 115412 | 115423 | 115434 | 115445 | 115456 | 115467 | 115488 |        |
| T4 NC_000866.4         | (114659) | GACATGATTGTCTCCTCTGAATTATATCTATTTATACAACCTCTCATATGCATATCAATGCCCATATCTTTAGAATAAAAAATATTCATCAAGATATC |        |        |        |        |        |        |        |        |        |
| SARS-CoV-2 NC_045512.2 | (29904)  | -----                                                                                              |        |        |        |        |        |        |        |        |        |
|                        |          | Section 1204                                                                                       |        |        |        |        |        |        |        |        |        |
|                        | (115489) | 115489                                                                                             | 115500 | 115511 | 115522 | 115533 | 115544 | 115555 | 115566 | 115584 |        |
| T4 NC_000866.4         | (114755) | CGGCAAATTTTCCTTTAATATAAAGGACATCTTACCACACGGGTGGTCGGCCAGGATACGAATATCCTGACGCTTAAGATTATGCTTTTTTCATTA   |        |        |        |        |        |        |        |        |        |
| SARS-CoV-2 NC_045512.2 | (29904)  | -----                                                                                              |        |        |        |        |        |        |        |        |        |

## SARS-CoV-2 &amp; T4.apr

|                        |          |                                                                                                   |        |        |        |        |        |        |        |        |        |
|------------------------|----------|---------------------------------------------------------------------------------------------------|--------|--------|--------|--------|--------|--------|--------|--------|--------|
|                        |          | Section 1205                                                                                      |        |        |        |        |        |        |        |        |        |
|                        | (115585) | 115585                                                                                            | 115599 | 115610 | 115621 | 115632 | 115643 | 115654 | 115665 | 115680 |        |
| T4 NC_000866.4         | (114851) | AGAATTGAATTTCCGTTTCAAATTCCTTCTTCATAATTAAAAGCATCATCAATGCTATATCTCATTATTTTCCAGCCTCAAATGCTCGCATGTCTTG |        |        |        |        |        |        |        |        |        |
| SARS-CoV-2 NC_045512.2 | (29904)  | -----                                                                                             |        |        |        |        |        |        |        |        |        |
|                        |          | Section 1206                                                                                      |        |        |        |        |        |        |        |        |        |
|                        | (115681) | 115681                                                                                            | 115687 | 115698 | 115709 | 115720 | 115731 | 115742 | 115753 | 115764 | 115776 |
| T4 NC_000866.4         | (114947) | AATATGCTTAATAGCAAATCCACGTGATTTAATAGCATCAAGAGCTCCGCTACAGAAATCTAATAAAATCCCCAATACTGCAACGAGGTATCAAC   |        |        |        |        |        |        |        |        |        |
| SARS-CoV-2 NC_045512.2 | (29904)  | -----                                                                                             |        |        |        |        |        |        |        |        |        |
|                        |          | Section 1207                                                                                      |        |        |        |        |        |        |        |        |        |
|                        | (115777) | 115777                                                                                            | 115786 | 115797 | 115808 | 115819 | 115830 | 115841 | 115852 | 115872 |        |
| T4 NC_000866.4         | (115043) | CTTTAAAACATCCTTATCCGCTGATAGAACTGTCTTCATTTCTGATTTCTCGTAACGATCCATACTAAATTCATCACCATCTCCTCGTCCCGAGTA  |        |        |        |        |        |        |        |        |        |
| SARS-CoV-2 NC_045512.2 | (29904)  | -----                                                                                             |        |        |        |        |        |        |        |        |        |
|                        |          | Section 1208                                                                                      |        |        |        |        |        |        |        |        |        |
|                        | (115873) | 115873                                                                                            | 115885 | 115896 | 115907 | 115918 | 115929 | 115940 | 115951 | 115968 |        |
| T4 NC_000866.4         | (115139) | GTAGTCTAATCTAGCTTTAAGAGCAACTTTTTCTGTGCTTCAATTCTAAGCATTTCTTTTAAATACTTGAATGCTTATTAAGCCATTTACTATA    |        |        |        |        |        |        |        |        |        |
| SARS-CoV-2 NC_045512.2 | (29904)  | -----                                                                                             |        |        |        |        |        |        |        |        |        |
|                        |          | Section 1209                                                                                      |        |        |        |        |        |        |        |        |        |
|                        | (115969) | 115969                                                                                            | 115984 | 115995 | 116006 | 116017 | 116028 | 116039 | 116050 | 116064 |        |
| T4 NC_000866.4         | (115235) | TAACATCACATTATTAGCTGCTTCATACTGTAATTTAGTCGAATCTATAAACACATCTTTCTTCAATTCTTCTTGAAGATCTTCTAATCTCATATT  |        |        |        |        |        |        |        |        |        |
| SARS-CoV-2 NC_045512.2 | (29904)  | -----                                                                                             |        |        |        |        |        |        |        |        |        |
|                        |          | Section 1210                                                                                      |        |        |        |        |        |        |        |        |        |
|                        | (116065) | 116065                                                                                            | 116072 | 116083 | 116094 | 116105 | 116116 | 116127 | 116138 | 116149 | 116160 |
| T4 NC_000866.4         | (115331) | GTTCTCTATTCAATTGTTATTGGTTGTTATTGGATGGACTTAGATTCATTATACCACGTTTTAACGTGAAGCATTATACTCTATTACTGGAAGCCA  |        |        |        |        |        |        |        |        |        |
| SARS-CoV-2 NC_045512.2 | (29904)  | -----                                                                                             |        |        |        |        |        |        |        |        |        |
|                        |          | Section 1211                                                                                      |        |        |        |        |        |        |        |        |        |
|                        | (116161) | 116161                                                                                            | 116171 | 116182 | 116193 | 116204 | 116215 | 116226 | 116237 | 116256 |        |
| T4 NC_000866.4         | (115427) | GCTGCAGTTTTATCTGCTCAATATCATCAGGATTATCGATGACCGAAAAGCGTATTTCTACTATCAGAGTATAATCGTCATAAACGGGTATCACAT  |        |        |        |        |        |        |        |        |        |
| SARS-CoV-2 NC_045512.2 | (29904)  | -----                                                                                             |        |        |        |        |        |        |        |        |        |

## SARS-CoV-2 &amp; T4.apr

|                        |          |                                                                                                   |        |        |        |        |        |        |        |              |        |
|------------------------|----------|---------------------------------------------------------------------------------------------------|--------|--------|--------|--------|--------|--------|--------|--------------|--------|
|                        |          |                                                                                                   |        |        |        |        |        |        |        | Section 1212 |        |
|                        | (116257) | 116257                                                                                            | 116270 | 116281 | 116292 | 116303 | 116314 | 116325 | 116336 | 116352       |        |
| T4 NC_000866.4         | (115523) | TAACTGCTAATTTATCAATACGTGGCTCATAGTTTCTTACTGCGCTTTCGATATTGCGTTCAACCGTGTCAGCAGTAAGAGGAGTCATATTTTCAA  |        |        |        |        |        |        |        |              |        |
| SARS-CoV-2 NC_045512.2 | (29904)  | -----                                                                                             |        |        |        |        |        |        |        |              |        |
|                        |          |                                                                                                   |        |        |        |        |        |        |        | Section 1213 |        |
|                        | (116353) | 116353                                                                                            | 116358 | 116369 | 116380 | 116391 | 116402 | 116413 | 116424 | 116435       | 116448 |
| T4 NC_000866.4         | (115619) | AAAGCTGGTCTGATAAATCACATCCAAATTCAGGGTCAAACGGTCTTGAACCTTTTCTTGTGTAATAATTCCCAAAGACTGTTTTTAATTGACC    |        |        |        |        |        |        |        |              |        |
| SARS-CoV-2 NC_045512.2 | (29904)  | -----                                                                                             |        |        |        |        |        |        |        |              |        |
|                        |          |                                                                                                   |        |        |        |        |        |        |        | Section 1214 |        |
|                        | (116449) | 116449                                                                                            | 116457 | 116468 | 116479 | 116490 | 116501 | 116512 | 116523 | 116544       |        |
| T4 NC_000866.4         | (115715) | TTAATCCAAGCGATCTGGAAACGTCTTTGTTCCAATCCATTTTCATTTCCGGGTCAATATCAGAATAAAGCTTATTAATATTTGCCATTATAGTAA  |        |        |        |        |        |        |        |              |        |
| SARS-CoV-2 NC_045512.2 | (29904)  | -----                                                                                             |        |        |        |        |        |        |        |              |        |
|                        |          |                                                                                                   |        |        |        |        |        |        |        | Section 1215 |        |
|                        | (116545) | 116545                                                                                            | 116556 | 116567 | 116578 | 116589 | 116600 | 116611 | 116622 | 116640       |        |
| T4 NC_000866.4         | (115811) | CTCAAAGAACTCTTTGAGGCCTCTTATTACGTGAGCATGGGTTTTTCCACACTCTGGACACTTAATTGGAACAGCCAAATAAACGGTAGGCTTTAA  |        |        |        |        |        |        |        |              |        |
| SARS-CoV-2 NC_045512.2 | (29904)  | -----                                                                                             |        |        |        |        |        |        |        |              |        |
|                        |          |                                                                                                   |        |        |        |        |        |        |        | Section 1216 |        |
|                        | (116641) | 116641                                                                                            | 116655 | 116666 | 116677 | 116688 | 116699 | 116710 | 116721 | 116736       |        |
| T4 NC_000866.4         | (115907) | AAGCATATCTTTTATAGCTACAATATCTGACTCTGTGATGATAGAATATAAATCTTCTAGTTCCTTTTCATTTAAGTCTTCAACTGGAATGCTTTC  |        |        |        |        |        |        |        |              |        |
| SARS-CoV-2 NC_045512.2 | (29904)  | -----                                                                                             |        |        |        |        |        |        |        |              |        |
|                        |          |                                                                                                   |        |        |        |        |        |        |        | Section 1217 |        |
|                        | (116737) | 116737                                                                                            | 116743 | 116754 | 116765 | 116776 | 116787 | 116798 | 116809 | 116820       | 116832 |
| T4 NC_000866.4         | (116003) | CCCGTTAGCATGAATCGTTTCTATACATGATACTATCATGTGGGCTATATTTTATCATCAAAAATTTTAGGGTATCGGAATTTAATTTTAATGTC   |        |        |        |        |        |        |        |              |        |
| SARS-CoV-2 NC_045512.2 | (29904)  | -----                                                                                             |        |        |        |        |        |        |        |              |        |
|                        |          |                                                                                                   |        |        |        |        |        |        |        | Section 1218 |        |
|                        | (116833) | 116833                                                                                            | 116842 | 116853 | 116864 | 116875 | 116886 | 116897 | 116908 | 116928       |        |
| T4 NC_000866.4         | (116099) | ACCTAGTGTATACCAGAGGTCTTCTGGTGCATCTATTTGTGTATGTAATAGATTTATATGGGTTGGTATTTTCAGTTCCACAGGTGCACTTCCAGGA |        |        |        |        |        |        |        |              |        |
| SARS-CoV-2 NC_045512.2 | (29904)  | -----                                                                                             |        |        |        |        |        |        |        |              |        |

## SARS-CoV-2 &amp; T4.apr

|                        |          |                                                                                                   |        |        |        |        |        |        |        |               |
|------------------------|----------|---------------------------------------------------------------------------------------------------|--------|--------|--------|--------|--------|--------|--------|---------------|
|                        |          |                                                                                                   |        |        |        |        |        |        |        | Section 1219  |
|                        | (116929) | 116929                                                                                            | 116941 | 116952 | 116963 | 116974 | 116985 | 116996 | 117007 | 117024        |
| T4 NC_000866.4         | (116195) | GTTTTTCGTGATTAACTTCACCGAGAGAATGTGCCCATAAATGAATCAACAATAGTTCTGATTCTTGCGGTTTAAATCTTTTGCATTTGTGCAGTC  |        |        |        |        |        |        |        |               |
| SARS-CoV-2 NC_045512.2 | (29904)  | -----                                                                                             |        |        |        |        |        |        |        |               |
|                        |          |                                                                                                   |        |        |        |        |        |        |        | Section 1220  |
|                        | (117025) | 117025                                                                                            | 117040 | 117051 | 117062 | 117073 | 117084 | 117095 | 117106 | 117120        |
| T4 NC_000866.4         | (116291) | TTTGATTAGCTTTTAAACAATTACTTCTACGGAACCATTATTTTTTGGCAGTAATAAGTTCTAGATATTCTTTAAGCGTGAATGCGCGACAATTGAT |        |        |        |        |        |        |        |               |
| SARS-CoV-2 NC_045512.2 | (29904)  | -----                                                                                             |        |        |        |        |        |        |        |               |
|                        |          |                                                                                                   |        |        |        |        |        |        |        | Section 1221  |
|                        | (117121) | 117121                                                                                            | 117128 | 117139 | 117150 | 117161 | 117172 | 117183 | 117194 | 117205 117216 |
| T4 NC_000866.4         | (116387) | TATTTTAGAACCAACTCTCACATCAAATTTGTATTTCATACATATTTAGCTCCTTTATTTATCATATTTATAAATAGAATAAAAGGAGCATCTATGG |        |        |        |        |        |        |        |               |
| SARS-CoV-2 NC_045512.2 | (29904)  | -----                                                                                             |        |        |        |        |        |        |        |               |
|                        |          |                                                                                                   |        |        |        |        |        |        |        | Section 1222  |
|                        | (117217) | 117217                                                                                            | 117227 | 117238 | 117249 | 117260 | 117271 | 117282 | 117293 | 117312        |
| T4 NC_000866.4         | (116483) | CAAACATTATTCGTTGTAAATTACCAGATGGTGTTCATCGTTTTAAACCATTTACGGTAGAAGATTATCGAGATTTTTTGTAGTTCGAAACGATA   |        |        |        |        |        |        |        |               |
| SARS-CoV-2 NC_045512.2 | (29904)  | -----                                                                                             |        |        |        |        |        |        |        |               |
|                        |          |                                                                                                   |        |        |        |        |        |        |        | Section 1223  |
|                        | (117313) | 117313                                                                                            | 117326 | 117337 | 117348 | 117359 | 117370 | 117381 | 117392 | 117408        |
| T4 NC_000866.4         | (116579) | TAGAACATCGGTCACCACAAGAACAAAAGCAAATAATTACTGATTTAATTGATGATTATTTTGGAGACTATCCGAAGACTTGGCAACCATTATAT   |        |        |        |        |        |        |        |               |
| SARS-CoV-2 NC_045512.2 | (29904)  | -----                                                                                             |        |        |        |        |        |        |        |               |
|                        |          |                                                                                                   |        |        |        |        |        |        |        | Section 1224  |
|                        | (117409) | 117409 117414                                                                                     | 117425 | 117436 | 117447 | 117458 | 117469 | 117480 | 117491 | 117504        |
| T4 NC_000866.4         | (116675) | TTTTGCAGGTATTTGTAGGGTCAATAGGTAAACTAAAGTACGGTCACATTTATATGTCCAAAATGTAAAAAGAAAAGACAGTTCCATTTGAAA     |        |        |        |        |        |        |        |               |
| SARS-CoV-2 NC_045512.2 | (29904)  | -----                                                                                             |        |        |        |        |        |        |        |               |
|                        |          |                                                                                                   |        |        |        |        |        |        |        | Section 1225  |
|                        | (117505) | 117505                                                                                            | 117513 | 117524 | 117535 | 117546 | 117557 | 117568 | 117579 | 117600        |
| T4 NC_000866.4         | (116771) | TATATCAAAAAGAATTAAAGGACCTTGTTTTTGTAGTGTAGCTAATGTTAAATTAATTAAGTTTCCTTCTGAGTTTTATGAAAATAAAGCAAAGA   |        |        |        |        |        |        |        |               |
| SARS-CoV-2 NC_045512.2 | (29904)  | -----                                                                                             |        |        |        |        |        |        |        |               |

## SARS-CoV-2 &amp; T4.apr

|                        |          |                                                                                                    |        |        |        |        |        |        |        |               |
|------------------------|----------|----------------------------------------------------------------------------------------------------|--------|--------|--------|--------|--------|--------|--------|---------------|
|                        |          |                                                                                                    |        |        |        |        |        |        |        | Section 1226  |
|                        | (117601) | 117601                                                                                             | 117612 | 117623 | 117634 | 117645 | 117656 | 117667 | 117678 | 117696        |
| T4 NC 000866.4         | (116867) | TGATTACTGAAAAATATTCATTCTGTTCAAGTAGATGAAATATGGTATGATTGGAAGGAAATTAGCGAGTCCAGTCAAATAGAAGTCTGACGCCA    |        |        |        |        |        |        |        |               |
| SARS-CoV-2 NC_045512.2 | (29904)  | -----                                                                                              |        |        |        |        |        |        |        |               |
|                        |          |                                                                                                    |        |        |        |        |        |        |        | Section 1227  |
|                        | (117697) | 117697                                                                                             | 117711 | 117722 | 117733 | 117744 | 117755 | 117766 | 117777 | 117792        |
| T4 NC 000866.4         | (116963) | TCGAGATAGAAACATTAGAAAAAATTCTCGATGCAATGAATCCTATTAATTTAACTCTACACATGTCATGCTGTAATAAGTACATTAAAAAATACA   |        |        |        |        |        |        |        |               |
| SARS-CoV-2 NC_045512.2 | (29904)  | -----                                                                                              |        |        |        |        |        |        |        |               |
|                        |          |                                                                                                    |        |        |        |        |        |        |        | Section 1228  |
|                        | (117793) | 117793                                                                                             | 117799 | 117810 | 117821 | 117832 | 117843 | 117854 | 117865 | 117876 117888 |
| T4 NC 000866.4         | (117059) | CTGATATAGTAGACGTGTTTAAAGCTATTAGTTAACCCAGATGAGATATTTACTTTTTATCAAATTAATCACACACTCGTAAAAAGTAATTATAGCT  |        |        |        |        |        |        |        |               |
| SARS-CoV-2 NC_045512.2 | (29904)  | -----                                                                                              |        |        |        |        |        |        |        |               |
|                        |          |                                                                                                    |        |        |        |        |        |        |        | Section 1229  |
|                        | (117889) | 117889                                                                                             | 117898 | 117909 | 117920 | 117931 | 117942 | 117953 | 117964 | 117984        |
| T4 NC 000866.4         | (117155) | TAAATTCAATAAGTAAAAATGATTCCCTGCCGAGCGCGGATTTCGTATTAAGTATGATTGAGAAGGATAAACAATAATGAGTATGTTGCAACGCCCGG |        |        |        |        |        |        |        |               |
| SARS-CoV-2 NC_045512.2 | (29904)  | -----                                                                                              |        |        |        |        |        |        |        |               |
|                        |          |                                                                                                    |        |        |        |        |        |        |        | Section 1230  |
|                        | (117985) | 117985                                                                                             | 117997 | 118008 | 118019 | 118030 | 118041 | 118052 | 118063 | 118080        |
| T4 NC 000866.4         | (117251) | ATATCCAAATCTCAGCGTTAAATTATTTGATAGCTACGACGCTTGGAGTAATAATAGATTTGTTGAATTAGCTGCTACTATTACCACATTAAGTAT   |        |        |        |        |        |        |        |               |
| SARS-CoV-2 NC_045512.2 | (29904)  | -----                                                                                              |        |        |        |        |        |        |        |               |
|                        |          |                                                                                                    |        |        |        |        |        |        |        | Section 1231  |
|                        | (118081) | 118081                                                                                             | 118096 | 118107 | 118118 | 118129 | 118140 | 118151 | 118162 | 118176        |
| T4 NC 000866.4         | (117347) | GCGGGATTCTCTTTATGGCCGAAATGAAGGAATGCTGCAGTTTTATGATTCTAAAAACATCCATACAAAAATGGATGGAAATGAAATAATTCAGAT   |        |        |        |        |        |        |        |               |
| SARS-CoV-2 NC_045512.2 | (29904)  | -----                                                                                              |        |        |        |        |        |        |        |               |
|                        |          |                                                                                                    |        |        |        |        |        |        |        | Section 1232  |
|                        | (118177) | 118177                                                                                             | 118184 | 118195 | 118206 | 118217 | 118228 | 118239 | 118250 | 118261 118272 |
| T4 NC 000866.4         | (117443) | TTCTGTAGCTAATGCAATGATATTAATAATGTTAAACACGAATTTATGGATGTAAGCATTTTTCCGTGTCAGTAGATTCAAAGGTGATAACAT      |        |        |        |        |        |        |        |               |
| SARS-CoV-2 NC_045512.2 | (29904)  | -----                                                                                              |        |        |        |        |        |        |        |               |



## SARS-CoV-2 &amp; T4.apr

|                        |          |                                                                                                     |        |        |        |        |        |        |        |              |
|------------------------|----------|-----------------------------------------------------------------------------------------------------|--------|--------|--------|--------|--------|--------|--------|--------------|
|                        |          |                                                                                                     |        |        |        |        |        |        |        | Section 1233 |
|                        | (118273) | 118273                                                                                              | 118283 | 118294 | 118305 | 118316 | 118327 | 118338 | 118349 | 118368       |
| T4 NC 000866.4         | (117539) | CATTGCTATTGAATTGGGAAC TATTCATTCTATAGAAAATCTTAAATTTGGTAGACCATTTTCCCTGATGCAGGTGAATCTATAAAAGAAATGCT    |        |        |        |        |        |        |        |              |
| SARS-CoV-2 NC_045512.2 | (29904)  | -----                                                                                               |        |        |        |        |        |        |        |              |
|                        |          |                                                                                                     |        |        |        |        |        |        |        | Section 1234 |
|                        | (118369) | 118369                                                                                              | 118382 | 118393 | 118404 | 118415 | 118426 | 118437 | 118448 | 118464       |
| T4 NC 000866.4         | (117635) | TGGTGTCAATTTATCAGGATCGCACATTATTA ACTCCAGCAATAAATGCTATAAATGCTTATGTTCCCTGATATTCCATGGACTAGCACATTTGAAAA |        |        |        |        |        |        |        |              |
| SARS-CoV-2 NC_045512.2 | (29904)  | -----                                                                                               |        |        |        |        |        |        |        |              |
|                        |          |                                                                                                     |        |        |        |        |        |        |        | Section 1235 |
|                        | (118465) | 118465                                                                                              | 118470 | 118481 | 118492 | 118503 | 118514 | 118525 | 118536 | 118560       |
| T4 NC 000866.4         | (117731) | CTATTTGTCATATGTAAGAGAAGTTGCTCTAGCTGTAGGAAGCGACAAATTTGTATTTGTATGGCAAGACATCATGGGCGTTAACATGATGGACTA    |        |        |        |        |        |        |        |              |
| SARS-CoV-2 NC_045512.2 | (29904)  | -----                                                                                               |        |        |        |        |        |        |        |              |
|                        |          |                                                                                                     |        |        |        |        |        |        |        | Section 1236 |
|                        | (118561) | 118561                                                                                              | 118569 | 118580 | 118591 | 118602 | 118613 | 118624 | 118635 | 118656       |
| T4 NC 000866.4         | (117827) | TGATATGATGATAAATCAAGAACCATATCCAATGATTGTCGGTGAGCCATCTTTAATAGGTCAATTCATCCAAGAATTAAATATCCATTAGCATA     |        |        |        |        |        |        |        |              |
| SARS-CoV-2 NC_045512.2 | (29904)  | -----                                                                                               |        |        |        |        |        |        |        |              |
|                        |          |                                                                                                     |        |        |        |        |        |        |        | Section 1237 |
|                        | (118657) | 118657                                                                                              | 118668 | 118679 | 118690 | 118701 | 118712 | 118723 | 118734 | 118752       |
| T4 NC 000866.4         | (117923) | TGATTTTCGTTTGGTTGACTAAATCGAATCCTCACAAACGTGACCCAATGAAAAACGCTACTATCTATGCGCATTTCATTTTGTAGATTCTTCAATACC |        |        |        |        |        |        |        |              |
| SARS-CoV-2 NC_045512.2 | (29904)  | -----                                                                                               |        |        |        |        |        |        |        |              |
|                        |          |                                                                                                     |        |        |        |        |        |        |        | Section 1238 |
|                        | (118753) | 118753                                                                                              | 118767 | 118778 | 118789 | 118800 | 118811 | 118822 | 118833 | 118848       |
| T4 NC 000866.4         | (118019) | AATGATTACTACAGGAAAGGGTGAAAAC TCTATTGTGGTGTCAAGGTCAGGTGCTTATTCTGAAATGACTTATAGGAATGGATATGAAGAAGCTAT   |        |        |        |        |        |        |        |              |
| SARS-CoV-2 NC_045512.2 | (29904)  | -----                                                                                               |        |        |        |        |        |        |        |              |
|                        |          |                                                                                                     |        |        |        |        |        |        |        | Section 1239 |
|                        | (118849) | 118849                                                                                              | 118855 | 118866 | 118877 | 118888 | 118899 | 118910 | 118921 | 118944       |
| T4 NC 000866.4         | (118115) | TCGTCTTCAAAC TATGGCACAAATATGACGGCTATGCTAAATGTTCTACTATCGGTAATTTTAACTTGACTCCTGGTGTTAAAATTATTTTAAATGA  |        |        |        |        |        |        |        |              |
| SARS-CoV-2 NC_045512.2 | (29904)  | -----                                                                                               |        |        |        |        |        |        |        |              |

## SARS-CoV-2 &amp; T4.apr

|                        |          |                                                                                                    |        |        |        |        |        |        |        |               |
|------------------------|----------|----------------------------------------------------------------------------------------------------|--------|--------|--------|--------|--------|--------|--------|---------------|
|                        |          | Section 1240                                                                                       |        |        |        |        |        |        |        |               |
|                        | (118945) | 118945                                                                                             | 118954 | 118965 | 118976 | 118987 | 118998 | 119009 | 119020 | 119040        |
| T4 NC 000866.4         | (118211) | TAGTAAAAACCAATTTAAACAGAATTTTACGTTGATGAAGTTATCCATGAATTATCCAATAATAATTCAGTAACTCATCTATATATGTTCACTAA    |        |        |        |        |        |        |        |               |
| SARS-CoV-2 NC_045512.2 | (29904)  | -----                                                                                              |        |        |        |        |        |        |        |               |
|                        |          | Section 1241                                                                                       |        |        |        |        |        |        |        |               |
|                        | (119041) | 119041                                                                                             | 119053 | 119064 | 119075 | 119086 | 119097 | 119108 | 119119 | 119136        |
| T4 NC 000866.4         | (118307) | TGCAACGAAACTGGAAACAATAGACCCAGTTAAGGTTAAAAATGAATTTAAATCTGATACTACCACTGAAGAAAGTAGTTCTTCCAATAAGCAATA   |        |        |        |        |        |        |        |               |
| SARS-CoV-2 NC_045512.2 | (29904)  | -----                                                                                              |        |        |        |        |        |        |        |               |
|                        |          | Section 1242                                                                                       |        |        |        |        |        |        |        |               |
|                        | (119137) | 119137                                                                                             | 119152 | 119163 | 119174 | 119185 | 119196 | 119207 | 119218 | 119232        |
| T4 NC 000866.4         | (118403) | AAGAAGTTTCTATTCTTAAATGGGTCTTAAACATTATAACATTTTAAAGATGTTAAAGGTCCTGATGAAAATTTAAACCTTCTCATTGATTCTA     |        |        |        |        |        |        |        |               |
| SARS-CoV-2 NC_045512.2 | (29904)  | -----                                                                                              |        |        |        |        |        |        |        |               |
|                        |          | Section 1243                                                                                       |        |        |        |        |        |        |        |               |
|                        | (119233) | 119233                                                                                             | 119240 | 119251 | 119262 | 119273 | 119284 | 119295 | 119306 | 119317 119328 |
| T4 NC 000866.4         | (118499) | TTTGTCCGAATTTATCACCAGGAGAAAGTTGATTTTCGTTTCTATTCATTTATTGGAATTTAATGGAAAGATTAAATCTCGTAAAGAAATAGATGGTT |        |        |        |        |        |        |        |               |
| SARS-CoV-2 NC_045512.2 | (29904)  | -----                                                                                              |        |        |        |        |        |        |        |               |
|                        |          | Section 1244                                                                                       |        |        |        |        |        |        |        |               |
|                        | (119329) | 119329                                                                                             | 119339 | 119350 | 119361 | 119372 | 119383 | 119394 | 119405 | 119424        |
| T4 NC 000866.4         | (118595) | ATACCTTATGACATTAATGATGTTTATGTATGCCAAAGATTGGAATTTCAATACCAAGGAAATACATTTTATTTTAGACCTCCTGGAAAATTTGAAC  |        |        |        |        |        |        |        |               |
| SARS-CoV-2 NC_045512.2 | (29904)  | -----                                                                                              |        |        |        |        |        |        |        |               |
|                        |          | Section 1245                                                                                       |        |        |        |        |        |        |        |               |
|                        | (119425) | 119425                                                                                             | 119438 | 119449 | 119460 | 119471 | 119482 | 119493 | 119504 | 119520        |
| T4 NC 000866.4         | (118691) | AATTTTTTAACGGTGAGCGATATGTTATCTAAATGCTTACTTAGGGTCAACGATGAAGTTAAAGAAATTAATTTTCTTGAGATGCCAGCATTTCGTTT |        |        |        |        |        |        |        |               |
| SARS-CoV-2 NC_045512.2 | (29904)  | -----                                                                                              |        |        |        |        |        |        |        |               |
|                        |          | Section 1246                                                                                       |        |        |        |        |        |        |        |               |
|                        | (119521) | 119521                                                                                             | 119526 | 119537 | 119548 | 119559 | 119570 | 119581 | 119592 | 119603 119616 |
| T4 NC 000866.4         | (118787) | TAAATGGGCAAATGATATTTTACAACCTTAGCAATTCCTGGCCCTAATGGTCCAATAACTGGAATTGGCAATATTATTGGATTATTTGAATGAA     |        |        |        |        |        |        |        |               |
| SARS-CoV-2 NC_045512.2 | (29904)  | -----                                                                                              |        |        |        |        |        |        |        |               |

## SARS-CoV-2 &amp; T4.apr

|                        |          |                                                                                                    |        |        |        |        |        |        |        |
|------------------------|----------|----------------------------------------------------------------------------------------------------|--------|--------|--------|--------|--------|--------|--------|
|                        |          | Section 1247                                                                                       |        |        |        |        |        |        |        |
|                        | (119617) | 119617                                                                                             | 119625 | 119636 | 119647 | 119658 | 119669 | 119680 | 119691 |
| T4 NC 000866.4         | (118883) | AAAGCCACAAGAAATGCAAACGATGCGTAGAAAAAGTTATTTTCAGATAATAAACCAACACAGGAAGCGGCTAAATCCGCTTCTAATACTTTATCTGG |        |        |        |        |        |        |        |
| SARS-CoV-2 NC_045512.2 | (29904)  | -----                                                                                              |        |        |        |        |        |        |        |
|                        |          | Section 1248                                                                                       |        |        |        |        |        |        |        |
|                        | (119713) | 119713                                                                                             | 119724 | 119735 | 119746 | 119757 | 119768 | 119779 | 119790 |
| T4 NC 000866.4         | (118979) | GCTTAATGACATATCTACGAAATTGGATGATGCTCAAGCTGCTTCTGAATTAATAGCTCAAAGTGTCTGAAGAAAAATCGAATGAAATAATTGGAGC  |        |        |        |        |        |        |        |
| SARS-CoV-2 NC_045512.2 | (29904)  | -----                                                                                              |        |        |        |        |        |        |        |
|                        |          | Section 1249                                                                                       |        |        |        |        |        |        |        |
|                        | (119809) | 119809                                                                                             | 119823 | 119834 | 119845 | 119856 | 119867 | 119878 | 119889 |
| T4 NC 000866.4         | (119075) | AATTGACAATGTAGAAAGCGCAGTGAGTGATACATCTGCCGGTTCTGAGTTAATTGCTGAAAGTGTCTGAAGTTGGCAACAATATTAATAAAGAAAT  |        |        |        |        |        |        |        |
| SARS-CoV-2 NC_045512.2 | (29904)  | -----                                                                                              |        |        |        |        |        |        |        |
|                        |          | Section 1250                                                                                       |        |        |        |        |        |        |        |
|                        | (119905) | 119905                                                                                             | 119911 | 119922 | 119933 | 119944 | 119955 | 119966 | 119977 |
| T4 NC 000866.4         | (119171) | CGGTGAATCGCTCGGAAGCAAATTAGATAAATTAACAAGTTTACTAGAGCAAAAAATCCAGACAGCTGGAATTCAACAGACTGGAAGTACTTTAGC   |        |        |        |        |        |        |        |
| SARS-CoV-2 NC_045512.2 | (29904)  | -----                                                                                              |        |        |        |        |        |        |        |
|                        |          | Section 1251                                                                                       |        |        |        |        |        |        |        |
|                        | (120001) | 120001                                                                                             | 120010 | 120021 | 120032 | 120043 | 120054 | 120065 | 120076 |
| T4 NC 000866.4         | (119267) | TACGGTTGAAAGCGCTATTCTGTAAAGTCGTTGAGGATGATACTGCTGAATCTGTGGGTCCTTTATTACCAGCTCCTGAAGCAGTTAATAATGA     |        |        |        |        |        |        |        |
| SARS-CoV-2 NC_045512.2 | (29904)  | -----                                                                                              |        |        |        |        |        |        |        |
|                        |          | Section 1252                                                                                       |        |        |        |        |        |        |        |
|                        | (120097) | 120097                                                                                             | 120109 | 120120 | 120131 | 120142 | 120153 | 120164 | 120175 |
| T4 NC 000866.4         | (119363) | TCCTGACGCTGATTTTTTCCCTACCCCTCAGCCAGTTGAGCCAAAGCAAGAATCACCAGAAGAAAAACAGAAAAAGAAGCATTTAACTTAAATT     |        |        |        |        |        |        |        |
| SARS-CoV-2 NC_045512.2 | (29904)  | -----                                                                                              |        |        |        |        |        |        |        |
|                        |          | Section 1253                                                                                       |        |        |        |        |        |        |        |
|                        | (120193) | 120193                                                                                             | 120208 | 120219 | 120230 | 120241 | 120252 | 120263 | 120274 |
| T4 NC 000866.4         | (119459) | ATCTCAAGCTTTAGATAAATTAACGAAGACTGTTGATTTTGGATTTAAAAAATCCATTTCAATTACTGATAAAATATCAAGCATGCTATTTAAGTA   |        |        |        |        |        |        |        |
| SARS-CoV-2 NC_045512.2 | (29904)  | -----                                                                                              |        |        |        |        |        |        |        |

## SARS-CoV-2 &amp; T4.apr

|                        |          |                                                                                                     |        |        |        |        |        |        |        |               |
|------------------------|----------|-----------------------------------------------------------------------------------------------------|--------|--------|--------|--------|--------|--------|--------|---------------|
|                        |          |                                                                                                     |        |        |        |        |        |        |        | Section 1254  |
|                        | (120289) | 120289                                                                                              | 120296 | 120307 | 120318 | 120329 | 120340 | 120351 | 120362 | 120373 120384 |
| T4 NC 000866.4         | (119555) | CACCGTCAGTGCTGCTATTGAAGCTGCTAAAATGACTGCAATGATATTGGCTGTTGTTGTTGGAATAGACCTTTTGATGATTCACCTTTAAATACTG   |        |        |        |        |        |        |        |               |
| SARS-CoV-2 NC_045512.2 | (29904)  | -----                                                                                               |        |        |        |        |        |        |        |               |
|                        |          |                                                                                                     |        |        |        |        |        |        |        | Section 1255  |
|                        | (120385) | 120385                                                                                              | 120395 | 120406 | 120417 | 120428 | 120439 | 120450 | 120461 | 120480        |
| T4 NC 000866.4         | (119651) | GTCAGATAAAATTTTCAAAGCCTGGGATTTGTTTAGTACAGACTTTACCAAATTCTCTAGCGAAACCGGAACCTTGGGGTCCTTTATTACAGAGCAT   |        |        |        |        |        |        |        |               |
| SARS-CoV-2 NC_045512.2 | (29904)  | -----                                                                                               |        |        |        |        |        |        |        |               |
|                        |          |                                                                                                     |        |        |        |        |        |        |        | Section 1256  |
|                        | (120481) | 120481                                                                                              | 120494 | 120505 | 120516 | 120527 | 120538 | 120549 | 120560 | 120576        |
| T4 NC 000866.4         | (119747) | CTTTGATTCTATTGATAAAATTAAACAACCTTTGGGAAGCGGGAGATTGGGGTGGATTGACAGTAGCTATTGTTGAAGGGCTTGGAAGGTTCTTTT    |        |        |        |        |        |        |        |               |
| SARS-CoV-2 NC_045512.2 | (29904)  | -----                                                                                               |        |        |        |        |        |        |        |               |
|                        |          |                                                                                                     |        |        |        |        |        |        |        | Section 1257  |
|                        | (120577) | 120577                                                                                              | 120582 | 120593 | 120604 | 120615 | 120626 | 120637 | 120648 | 120659 120672 |
| T4 NC 000866.4         | (119843) | TAATTTAGGTGAACCTTATTCAATTAGGTATGGCTAAATTATCTGCAGCAATTCTTCGAGTCATTCTGGTATGAAGGATACTGCTGATGAAGTAGA    |        |        |        |        |        |        |        |               |
| SARS-CoV-2 NC_045512.2 | (29904)  | -----                                                                                               |        |        |        |        |        |        |        |               |
|                        |          |                                                                                                     |        |        |        |        |        |        |        | Section 1258  |
|                        | (120673) | 120673                                                                                              | 120681 | 120692 | 120703 | 120714 | 120725 | 120736 | 120747 | 120768        |
| T4 NC 000866.4         | (119939) | AGGAAGAGCATTAGAAAAATTTCCAAAATTCTACTGGAGCATCTCTCAATAAAGAAGACCAAGAAAAAGTAGCAAATTATCAAGATAAACGAATGAA   |        |        |        |        |        |        |        |               |
| SARS-CoV-2 NC_045512.2 | (29904)  | -----                                                                                               |        |        |        |        |        |        |        |               |
|                        |          |                                                                                                     |        |        |        |        |        |        |        | Section 1259  |
|                        | (120769) | 120769                                                                                              | 120780 | 120791 | 120802 | 120813 | 120824 | 120835 | 120846 | 120864        |
| T4 NC 000866.4         | (120035) | TGGAGACCTTGGCCCAATAGCAGAAGGACTAGACAAAATCTCTAACTGGAAAACCTCGTGCATCTAACTGGATTCTGTTGGTGTAGATAATAAAGAAGC |        |        |        |        |        |        |        |               |
| SARS-CoV-2 NC_045512.2 | (29904)  | -----                                                                                               |        |        |        |        |        |        |        |               |
|                        |          |                                                                                                     |        |        |        |        |        |        |        | Section 1260  |
|                        | (120865) | 120865                                                                                              | 120879 | 120890 | 120901 | 120912 | 120923 | 120934 | 120945 | 120960        |
| T4 NC 000866.4         | (120131) | GCTGACTACCGACGAAGAGCGTGCGGCAGAAGAAGAAAAATTAAAGCAACTTTCACCGGAAGAAAGAAAAAATGCTTTAATGAAGGCTAATGAAGC    |        |        |        |        |        |        |        |               |
| SARS-CoV-2 NC_045512.2 | (29904)  | -----                                                                                               |        |        |        |        |        |        |        |               |

## SARS-CoV-2 &amp; T4.apr

|                        |          |                                                                                                  |        |        |        |        |        |        |        |        |              |
|------------------------|----------|--------------------------------------------------------------------------------------------------|--------|--------|--------|--------|--------|--------|--------|--------|--------------|
|                        |          |                                                                                                  |        |        |        |        |        |        |        |        | Section 1261 |
|                        | (120961) | 120961                                                                                           | 120967 | 120978 | 120989 | 121000 | 121011 | 121022 | 121033 | 121044 | 121056       |
| T4 NC_000866.4         | (120227) | TCGTGCTGCGATGATTGTTTTGAAAAATATGCCGATTCAGCTGATATGAGTAAAGACTCAACGGTTAAATCAGTTGAAGCTGCCTATGAAGACCT  |        |        |        |        |        |        |        |        |              |
| SARS-CoV-2 NC_045512.2 | (29904)  | -----                                                                                            |        |        |        |        |        |        |        |        |              |
|                        |          |                                                                                                  |        |        |        |        |        |        |        |        | Section 1262 |
|                        | (121057) | 121057                                                                                           | 121066 | 121077 | 121088 | 121099 | 121110 | 121121 | 121132 |        | 121152       |
| T4 NC_000866.4         | (120323) | TAAAAAACGGATGGATGACCCGGATTAAATAATTCACCGGCAGTTAAAAAGAAGTTGCTGCTAGATTTTCTAAAATTGATGCTACTTATCAAGA   |        |        |        |        |        |        |        |        |              |
| SARS-CoV-2 NC_045512.2 | (29904)  | -----                                                                                            |        |        |        |        |        |        |        |        |              |
|                        |          |                                                                                                  |        |        |        |        |        |        |        |        | Section 1263 |
|                        | (121153) | 121153                                                                                           | 121165 | 121176 | 121187 | 121198 | 121209 | 121220 | 121231 |        | 121248       |
| T4 NC_000866.4         | (120419) | GCTCAAGAAAAATCAGCCTAATGCCAAACCTGAACTTCTGCTAAATCACCAGAAGCGAAACAAGTCCAGGTGATTGAAAAGAACAAAGCACAGCA  |        |        |        |        |        |        |        |        |              |
| SARS-CoV-2 NC_045512.2 | (29904)  | -----                                                                                            |        |        |        |        |        |        |        |        |              |
|                        |          |                                                                                                  |        |        |        |        |        |        |        |        | Section 1264 |
|                        | (121249) | 121249                                                                                           | 121264 | 121275 | 121286 | 121297 | 121308 | 121319 | 121330 | 121344 |              |
| T4 NC_000866.4         | (120515) | AGCTCCTGTTCAACAAGCATCTCCTTCGATCAATAATACTAATAATGTTATTAAGAAAAATACTGTCGTTTATAATATGACACCTGTAACGAGCAC |        |        |        |        |        |        |        |        |              |
| SARS-CoV-2 NC_045512.2 | (29904)  | -----                                                                                            |        |        |        |        |        |        |        |        |              |
|                        |          |                                                                                                  |        |        |        |        |        |        |        |        | Section 1265 |
|                        | (121345) | 121345                                                                                           | 121352 | 121363 | 121374 | 121385 | 121396 | 121407 | 121418 | 121429 | 121440       |
| T4 NC_000866.4         | (120611) | GACTGCTCCTGGTGTATTTGATGCGACTGGAGTTAATTAAGGAATAATATGGCAATTGTTAAAGAAATAACTGCTGATTTAATTAAGTCCGGT    |        |        |        |        |        |        |        |        |              |
| SARS-CoV-2 NC_045512.2 | (29904)  | -----                                                                                            |        |        |        |        |        |        |        |        |              |
|                        |          |                                                                                                  |        |        |        |        |        |        |        |        | Section 1266 |
|                        | (121441) | 121441                                                                                           | 121451 | 121462 | 121473 | 121484 | 121495 | 121506 | 121517 |        | 121536       |
| T4 NC_000866.4         | (120707) | GAGAAAATTTTCAGCCGGACAGAGTACTAAATCAGAAGTAGGAACTAAAACATACACAGCCAGTTTCCAAGTGGGCGTGCTAGTGGTAATGACACT |        |        |        |        |        |        |        |        |              |
| SARS-CoV-2 NC_045512.2 | (29904)  | -----                                                                                            |        |        |        |        |        |        |        |        |              |
|                        |          |                                                                                                  |        |        |        |        |        |        |        |        | Section 1267 |
|                        | (121537) | 121537                                                                                           | 121550 | 121561 | 121572 | 121583 | 121594 | 121605 | 121616 |        | 121632       |
| T4 NC_000866.4         | (120803) | ACAGAGGACTTCCAGGTAACAGATCTATATAAGAATGGATTATTATTTACTGCATACAATATGTCATCTAGGGATTCTGGAAGTCTTAGATCGATG |        |        |        |        |        |        |        |        |              |
| SARS-CoV-2 NC_045512.2 | (29904)  | -----                                                                                            |        |        |        |        |        |        |        |        |              |

## SARS-CoV-2 &amp; T4.apr

|                        |          |                                                                                                  |        |        |        |        |        |        |        |        |              |
|------------------------|----------|--------------------------------------------------------------------------------------------------|--------|--------|--------|--------|--------|--------|--------|--------|--------------|
|                        |          |                                                                                                  |        |        |        |        |        |        |        |        | Section 1268 |
|                        | (121633) | 121633                                                                                           | 121638 | 121649 | 121660 | 121671 | 121682 | 121693 | 121704 | 121715 | 121728       |
| T4 NC_000866.4         | (120899) | AGATCTAACTACTCTTCTTCATCTTCGAGTATTTTACGTACAGCTAGAAACACTATTAGTAGTACAGTATCAAAACTATCAAATGGATTAATATCA |        |        |        |        |        |        |        |        |              |
| SARS-CoV-2 NC_045512.2 | (29904)  | -----                                                                                            |        |        |        |        |        |        |        |        |              |
|                        |          |                                                                                                  |        |        |        |        |        |        |        |        | Section 1269 |
|                        | (121729) | 121729                                                                                           | 121737 | 121748 | 121759 | 121770 | 121781 | 121792 | 121803 | 121824 |              |
| T4 NC_000866.4         | (120995) | AATAATAATTTCAGGAACAATAAGTAAATCTCCTATCGCAAACATTCTTTTACCGAGATCTAAATCTGATGTTGATACATCATCATAGATTTAAT  |        |        |        |        |        |        |        |        |              |
| SARS-CoV-2 NC_045512.2 | (29904)  | -----                                                                                            |        |        |        |        |        |        |        |        |              |
|                        |          |                                                                                                  |        |        |        |        |        |        |        |        | Section 1270 |
|                        | (121825) | 121825                                                                                           | 121836 | 121847 | 121858 | 121869 | 121880 | 121891 | 121902 | 121920 |              |
| T4 NC_000866.4         | (121091) | GATGTTCAAGAAAGCCTTATCAGTAGAGGCGGAGGTACTGCTACTGGTGTGCTAAGTAATATTGCTTCAACCGCAGTATTTGGGGCACTGGAAAGT |        |        |        |        |        |        |        |        |              |
| SARS-CoV-2 NC_045512.2 | (29904)  | -----                                                                                            |        |        |        |        |        |        |        |        |              |
|                        |          |                                                                                                  |        |        |        |        |        |        |        |        | Section 1271 |
|                        | (121921) | 121921                                                                                           | 121935 | 121946 | 121957 | 121968 | 121979 | 121990 | 122001 | 122016 |              |
| T4 NC_000866.4         | (121187) | ATAACACAAGGTATAATGGCTGATAATAATGAACAGATTTATACGACAGCCAGAAGTATGTATGGTGGTGCTGAAAATAGAACTAAAGTGTTTACA |        |        |        |        |        |        |        |        |              |
| SARS-CoV-2 NC_045512.2 | (29904)  | -----                                                                                            |        |        |        |        |        |        |        |        |              |
|                        |          |                                                                                                  |        |        |        |        |        |        |        |        | Section 1272 |
|                        | (122017) | 122017                                                                                           | 122023 | 122034 | 122045 | 122056 | 122067 | 122078 | 122089 | 122100 | 122112       |
| T4 NC_000866.4         | (121283) | TGGGATTTGACTCCACGTTCAACAGAAGATTTAATGGCTATTATTAATATCTATCAATATTTTAACTATTTTTCTTATGGTGAAACGGGTAAATCT |        |        |        |        |        |        |        |        |              |
| SARS-CoV-2 NC_045512.2 | (29904)  | -----                                                                                            |        |        |        |        |        |        |        |        |              |
|                        |          |                                                                                                  |        |        |        |        |        |        |        |        | Section 1273 |
|                        | (122113) | 122113                                                                                           | 122122 | 122133 | 122144 | 122155 | 122166 | 122177 | 122188 | 122208 |              |
| T4 NC_000866.4         | (121379) | CAATATGCTGCTGAAATAAAGGGGTATTTAGATGATTGGTATCGTTCTACGTTAATTGAACCTTTATCTCCGGAAGACGCAGCTAAAAATAAAACA |        |        |        |        |        |        |        |        |              |
| SARS-CoV-2 NC_045512.2 | (29904)  | -----                                                                                            |        |        |        |        |        |        |        |        |              |
|                        |          |                                                                                                  |        |        |        |        |        |        |        |        | Section 1274 |
|                        | (122209) | 122209                                                                                           | 122221 | 122232 | 122243 | 122254 | 122265 | 122276 | 122287 | 122304 |              |
| T4 NC_000866.4         | (121475) | CTATTTGAGAAAATGACATCGAGTTTAACTAACGTTCTAGTAGTTTCAAACCCGACAGTTTGGATGGTGAAAACTTTGGCGCAACATCTAAGTTT  |        |        |        |        |        |        |        |        |              |
| SARS-CoV-2 NC_045512.2 | (29904)  | -----                                                                                            |        |        |        |        |        |        |        |        |              |

## SARS-CoV-2 &amp; T4.apr

|                        |          |                                                                                                  |        |        |        |        |        |        |        |               |
|------------------------|----------|--------------------------------------------------------------------------------------------------|--------|--------|--------|--------|--------|--------|--------|---------------|
|                        |          |                                                                                                  |        |        |        |        |        |        |        | Section 1275  |
|                        | (122305) | 122305                                                                                           | 122320 | 122331 | 122342 | 122353 | 122364 | 122375 | 122386 | 122400        |
| T4 NC 000866.4         | (121571) | GATGGAAAAACGGAAATATTTGGTCCATGTCAAATACAGAGCATTAGATTTGATAAAACACCTAATGGTAACTTTAACGGATTAGCTATTGCTCCA |        |        |        |        |        |        |        |               |
| SARS-CoV-2 NC_045512.2 | (29904)  | -----                                                                                            |        |        |        |        |        |        |        |               |
|                        |          |                                                                                                  |        |        |        |        |        |        |        | Section 1276  |
|                        | (122401) | 122401                                                                                           | 122408 | 122419 | 122430 | 122441 | 122452 | 122463 | 122474 | 122485 122496 |
| T4 NC 000866.4         | (121667) | AACCTCCCTAGTACATTTACTCTCGAGATTACTATGAGAGAAATTATCACGTTAAACCGTGCTTCTTTATATGCGGGGACTTTTTAATGTATTCTT |        |        |        |        |        |        |        |               |
| SARS-CoV-2 NC_045512.2 | (29904)  | -----                                                                                            |        |        |        |        |        |        |        |               |
|                        |          |                                                                                                  |        |        |        |        |        |        |        | Section 1277  |
|                        | (122497) | 122497                                                                                           | 122507 | 122518 | 122529 | 122540 | 122551 | 122562 | 122573 | 122592        |
| T4 NC 000866.4         | (121763) | TAGAGGAATTTAATAATCAAGCAATAAACGCAGATTTCCAACGTAATAATATGTTTAGCTGCGTTTTTGCACAACTCCATCAACTAAAAGCTCTT  |        |        |        |        |        |        |        |               |
| SARS-CoV-2 NC_045512.2 | (29904)  | -----                                                                                            |        |        |        |        |        |        |        |               |
|                        |          |                                                                                                  |        |        |        |        |        |        |        | Section 1278  |
|                        | (122593) | 122593                                                                                           | 122606 | 122617 | 122628 | 122639 | 122650 | 122661 | 122672 | 122688        |
| T4 NC 000866.4         | (121859) | CGTTGATAAGTTCAATTAGCAACTTTTCTTATAATAACTTGGGCCTAAATTCAGATTGGTTAGGATTAAGTCAAGGTGATATTAATCAGGGAATTA |        |        |        |        |        |        |        |               |
| SARS-CoV-2 NC_045512.2 | (29904)  | -----                                                                                            |        |        |        |        |        |        |        |               |
|                        |          |                                                                                                  |        |        |        |        |        |        |        | Section 1279  |
|                        | (122689) | 122689                                                                                           | 122694 | 122705 | 122716 | 122727 | 122738 | 122749 | 122760 | 122771 122784 |
| T4 NC 000866.4         | (121955) | CCACGCTAATTACAGCTGGCACACAAAACTGATAAGAAAATCAGGAGTCAGTAAATATCTTATTGGTGCCATGAGTCAACGTACAGTTCAAAGTT  |        |        |        |        |        |        |        |               |
| SARS-CoV-2 NC_045512.2 | (29904)  | -----                                                                                            |        |        |        |        |        |        |        |               |
|                        |          |                                                                                                  |        |        |        |        |        |        |        | Section 1280  |
|                        | (122785) | 122785                                                                                           | 122793 | 122804 | 122815 | 122826 | 122837 | 122848 | 122859 | 122880        |
| T4 NC 000866.4         | (122051) | TATTAGGCTCATTTACAGTTGGTACATATTTAATTGACTTCTTTAACATGGCATATAACTCATCTGGATTGATGATATACTCTGTAAAAATGCCAG |        |        |        |        |        |        |        |               |
| SARS-CoV-2 NC_045512.2 | (29904)  | -----                                                                                            |        |        |        |        |        |        |        |               |
|                        |          |                                                                                                  |        |        |        |        |        |        |        | Section 1281  |
|                        | (122881) | 122881                                                                                           | 122892 | 122903 | 122914 | 122925 | 122936 | 122947 | 122958 | 122976        |
| T4 NC 000866.4         | (122147) | AGAATAGATTATCCTATGAAACTGACTGGAACATAATTCTCCTAATATTCGTATAACCGGAAGAGAATTAGACCCTTTGGTTATTTTATTAGAA   |        |        |        |        |        |        |        |               |
| SARS-CoV-2 NC_045512.2 | (29904)  | -----                                                                                            |        |        |        |        |        |        |        |               |

## SARS-CoV-2 &amp; T4.apr

|                        |          |                                                                                                    |                        |                        |                        |                        |                        |                        |                        |                                               |
|------------------------|----------|----------------------------------------------------------------------------------------------------|------------------------|------------------------|------------------------|------------------------|------------------------|------------------------|------------------------|-----------------------------------------------|
|                        |          |                                                                                                    |                        |                        |                        |                        |                        |                        |                        | Section 1282                                  |
|                        | (122977) | <a href="#">122977</a>                                                                             | <a href="#">122991</a> | <a href="#">123002</a> | <a href="#">123013</a> | <a href="#">123024</a> | <a href="#">123035</a> | <a href="#">123046</a> | <a href="#">123057</a> | <a href="#">123072</a>                        |
| T4 NC_000866.4         | (122243) | TGGATTTCAGAAGCTTGTAACATATCGTGCAATGCAAGACTGGGTAACTCCGTTCAAGACCCAGTAACTGGACTGCGTGCTTTGCCACAAGATGTCG  |                        |                        |                        |                        |                        |                        |                        |                                               |
| SARS-CoV-2 NC_045512.2 | (29904)  | -----                                                                                              |                        |                        |                        |                        |                        |                        |                        |                                               |
|                        |          |                                                                                                    |                        |                        |                        |                        |                        |                        |                        | Section 1283                                  |
|                        | (123073) | <a href="#">123073</a>                                                                             | <a href="#">123079</a> | <a href="#">123090</a> | <a href="#">123101</a> | <a href="#">123112</a> | <a href="#">123123</a> | <a href="#">123134</a> | <a href="#">123145</a> | <a href="#">123156</a> <a href="#">123168</a> |
| T4 NC_000866.4         | (122339) | AGGCAGATATTTCAGGTTAATCTTCATTCTCGCAATGGATTACCTCATACTGCGGTGATGTTTCACGATGCATTCAATATCAGTGAGCGCTCCTGAGT |                        |                        |                        |                        |                        |                        |                        |                                               |
| SARS-CoV-2 NC_045512.2 | (29904)  | -----                                                                                              |                        |                        |                        |                        |                        |                        |                        |                                               |
|                        |          |                                                                                                    |                        |                        |                        |                        |                        |                        |                        | Section 1284                                  |
|                        | (123169) | <a href="#">123169</a>                                                                             | <a href="#">123178</a> | <a href="#">123189</a> | <a href="#">123200</a> | <a href="#">123211</a> | <a href="#">123222</a> | <a href="#">123233</a> | <a href="#">123244</a> | <a href="#">123264</a>                        |
| T4 NC_000866.4         | (122435) | TATCATATGATGGAGATAACCAAATAACTACATTTGATGTTACTTTTGCGTACAGAGTGATGCAGGCTGGAGCAGTTGATAGGCAACGTGCGCTTG   |                        |                        |                        |                        |                        |                        |                        |                                               |
| SARS-CoV-2 NC_045512.2 | (29904)  | -----                                                                                              |                        |                        |                        |                        |                        |                        |                        |                                               |
|                        |          |                                                                                                    |                        |                        |                        |                        |                        |                        |                        | Section 1285                                  |
|                        | (123265) | <a href="#">123265</a>                                                                             | <a href="#">123277</a> | <a href="#">123288</a> | <a href="#">123299</a> | <a href="#">123310</a> | <a href="#">123321</a> | <a href="#">123332</a> | <a href="#">123343</a> | <a href="#">123360</a>                        |
| T4 NC_000866.4         | (122531) | AATGGCTTGAATCTGCTGCTATAAATGGTATTCAAAGCGTTCTCGGAAATAGTGGAGGTGTTACTGGACTATCTAATTCGCTTTTCACGACTTAGTA  |                        |                        |                        |                        |                        |                        |                        |                                               |
| SARS-CoV-2 NC_045512.2 | (29904)  | -----                                                                                              |                        |                        |                        |                        |                        |                        |                        |                                               |
|                        |          |                                                                                                    |                        |                        |                        |                        |                        |                        |                        | Section 1286                                  |
|                        | (123361) | <a href="#">123361</a>                                                                             | <a href="#">123376</a> | <a href="#">123387</a> | <a href="#">123398</a> | <a href="#">123409</a> | <a href="#">123420</a> | <a href="#">123431</a> | <a href="#">123442</a> | <a href="#">123456</a>                        |
| T4 NC_000866.4         | (122627) | GATTAGGGGGAACATGCAGGAAGCATTTCAAACATTAATACTATGACAGGAATTGTCAATTCGCAGAGTAAATATTAGGAGCAATATAACAATGGG   |                        |                        |                        |                        |                        |                        |                        |                                               |
| SARS-CoV-2 NC_045512.2 | (29904)  | -----                                                                                              |                        |                        |                        |                        |                        |                        |                        |                                               |
|                        |          |                                                                                                    |                        |                        |                        |                        |                        |                        |                        | Section 1287                                  |
|                        | (123457) | <a href="#">123457</a>                                                                             | <a href="#">123464</a> | <a href="#">123475</a> | <a href="#">123486</a> | <a href="#">123497</a> | <a href="#">123508</a> | <a href="#">123519</a> | <a href="#">123530</a> | <a href="#">123541</a> <a href="#">123552</a> |
| T4 NC_000866.4         | (122723) | GACCGAAAGGTCCATATTTTTATTACGGAATGAAATGAAAGCAGCAACTGAAGCAACTAACTGTCTTCAATATAAACTTCAATTTTTACAGGAG     |                        |                        |                        |                        |                        |                        |                        |                                               |
| SARS-CoV-2 NC_045512.2 | (29904)  | -----                                                                                              |                        |                        |                        |                        |                        |                        |                        |                                               |
|                        |          |                                                                                                    |                        |                        |                        |                        |                        |                        |                        | Section 1288                                  |
|                        | (123553) | <a href="#">123553</a>                                                                             | <a href="#">123563</a> | <a href="#">123574</a> | <a href="#">123585</a> | <a href="#">123596</a> | <a href="#">123607</a> | <a href="#">123618</a> | <a href="#">123629</a> | <a href="#">123648</a>                        |
| T4 NC_000866.4         | (122819) | CTTCTGACTCAAATTTACCTGTTACTACACCCTGAAAAATACTTTTCAGTCTGTTCTGGCTTTGAAAAATTTTCAGAAGGAAAAATTCCGAACTTTT  |                        |                        |                        |                        |                        |                        |                        |                                               |
| SARS-CoV-2 NC_045512.2 | (29904)  | -----                                                                                              |                        |                        |                        |                        |                        |                        |                        |                                               |



## SARS-CoV-2 &amp; T4.apr

|                        |          |                                                                                                   |        |        |        |        |        |        |        |              |        |
|------------------------|----------|---------------------------------------------------------------------------------------------------|--------|--------|--------|--------|--------|--------|--------|--------------|--------|
|                        |          |                                                                                                   |        |        |        |        |        |        |        | Section 1289 |        |
|                        | (123649) | 123649                                                                                            | 123662 | 123673 | 123684 | 123695 | 123706 | 123717 | 123728 | 123744       |        |
| T4 NC_000866.4         | (122915) | TATCTGTTCCAAAAATTTTGATAAATTCATCGTAAACCGCTTCGTTAAAAGCATTATCAGCAGGAATAACGCCTTCAACTACAAGTTCTTGACCTA  |        |        |        |        |        |        |        |              |        |
| SARS-CoV-2 NC_045512.2 | (29904)  | -----                                                                                             |        |        |        |        |        |        |        |              |        |
|                        |          |                                                                                                   |        |        |        |        |        |        |        | Section 1290 |        |
|                        | (123745) | 123745                                                                                            | 123750 | 123761 | 123772 | 123783 | 123794 | 123805 | 123816 | 123827       | 123840 |
| T4 NC_000866.4         | (123011) | AAAAGCGTAAAGAAGATTTTCATTTTGTGTTCCCTCATGTTATGTTAGTAAGACTACTATAACACAACACGAGGGACTTGTAAGTACATTTTGAAC  |        |        |        |        |        |        |        |              |        |
| SARS-CoV-2 NC_045512.2 | (29904)  | -----                                                                                             |        |        |        |        |        |        |        |              |        |
|                        |          |                                                                                                   |        |        |        |        |        |        |        | Section 1291 |        |
|                        | (123841) | 123841                                                                                            | 123849 | 123860 | 123871 | 123882 | 123893 | 123904 | 123915 | 123936       |        |
| T4 NC_000866.4         | (123107) | TTTTAGTACGCGTAATAGGCATGCGTCGATTTTATACTGTTTCATTGTTTGAAGAGCAGTATCAAAAACAGCATTAAATGACACCAATTGGATTTC  |        |        |        |        |        |        |        |              |        |
| SARS-CoV-2 NC_045512.2 | (29904)  | -----                                                                                             |        |        |        |        |        |        |        |              |        |
|                        |          |                                                                                                   |        |        |        |        |        |        |        | Section 1292 |        |
|                        | (123937) | 123937                                                                                            | 123948 | 123959 | 123970 | 123981 | 123992 | 124003 | 124014 | 124032       |        |
| T4 NC_000866.4         | (123203) | ACCCAAGTTTTTAAAGCTTAATAATGATAGTTTCTCATTAACACCTATCATTACGATATGCATCATTTTATCGCCTGGTTTAAACGTTTTATTTGTA |        |        |        |        |        |        |        |              |        |
| SARS-CoV-2 NC_045512.2 | (29904)  | -----                                                                                             |        |        |        |        |        |        |        |              |        |
|                        |          |                                                                                                   |        |        |        |        |        |        |        | Section 1293 |        |
|                        | (124033) | 124033                                                                                            | 124047 | 124058 | 124069 | 124080 | 124091 | 124102 | 124113 | 124128       |        |
| T4 NC_000866.4         | (123299) | TCACCGCCAGAGGTGTATGTACAAAATCTAAATCCAGGAAGTACACTTTCTTCACCGGCTTGAATAGCAAAAATTTGTGGTATTTTATGCTTAGGA  |        |        |        |        |        |        |        |              |        |
| SARS-CoV-2 NC_045512.2 | (29904)  | -----                                                                                             |        |        |        |        |        |        |        |              |        |
|                        |          |                                                                                                   |        |        |        |        |        |        |        | Section 1294 |        |
|                        | (124129) | 124129                                                                                            | 124135 | 124146 | 124157 | 124168 | 124179 | 124190 | 124201 | 124212       | 124224 |
| T4 NC_000866.4         | (123395) | TTTAATGTAACAACCGGCGCCGAAGCGCCGTCAAATAATTCTGTAATAAGTTCCATGATTTATCCTTGAACGAAGTTGTAAGGCATGTTTGCAATA  |        |        |        |        |        |        |        |              |        |
| SARS-CoV-2 NC_045512.2 | (29904)  | -----                                                                                             |        |        |        |        |        |        |        |              |        |
|                        |          |                                                                                                   |        |        |        |        |        |        |        | Section 1295 |        |
|                        | (124225) | 124225                                                                                            | 124234 | 124245 | 124256 | 124267 | 124278 | 124289 | 124300 | 124320       |        |
| T4 NC_000866.4         | (123491) | TCTATGCAAGACGCAATAATTCCAAGAGATGATTCTACTTTCTGTTTAAACATTTGATGAAACAAATGATGCAAAGTCAACTCTATCTTCTATATCA |        |        |        |        |        |        |        |              |        |
| SARS-CoV-2 NC_045512.2 | (29904)  | -----                                                                                             |        |        |        |        |        |        |        |              |        |

## SARS-CoV-2 &amp; T4.apr

|                        |          |                                                                                                    |        |        |        |        |        |        |        |               |
|------------------------|----------|----------------------------------------------------------------------------------------------------|--------|--------|--------|--------|--------|--------|--------|---------------|
|                        |          |                                                                                                    |        |        |        |        |        |        |        | Section 1296  |
|                        | (124321) | 124321                                                                                             | 124333 | 124344 | 124355 | 124366 | 124377 | 124388 | 124399 | 124416        |
| T4 NC 000866.4         | (123587) | CCTGTCATTGTAACCAATTCAACCAGTTTCCATTAAATGGTCTCCGTCATAGATTACCGATTTCGGTGAGTTCTTCTGTGGTCATAACTTCAGCTTGA |        |        |        |        |        |        |        |               |
| SARS-CoV-2 NC_045512.2 | (29904)  | -----                                                                                              |        |        |        |        |        |        |        |               |
|                        |          |                                                                                                    |        |        |        |        |        |        |        | Section 1297  |
|                        | (124417) | 124417                                                                                             | 124432 | 124443 | 124454 | 124465 | 124476 | 124487 | 124498 | 124512        |
| T4 NC 000866.4         | (123683) | ATAAGCTTGTTGTTAGTTTAACTGTTCCATCATTGTAAGATGCATCGGTTATTTTATTAACCTTGACCATTAATCCACGTGGCAAATGACTTCC     |        |        |        |        |        |        |        |               |
| SARS-CoV-2 NC_045512.2 | (29904)  | -----                                                                                              |        |        |        |        |        |        |        |               |
|                        |          |                                                                                                    |        |        |        |        |        |        |        | Section 1298  |
|                        | (124513) | 124513                                                                                             | 124520 | 124531 | 124542 | 124553 | 124564 | 124575 | 124586 | 124597 124608 |
| T4 NC 000866.4         | (123779) | ATTTTCATTTGAAGGCGCTAAACTTCCACCGGGTAAACAACATTGACCTTATCAGCCCCAGTAATAACCCATCCAATTCCAACATAAATTATCGCTA  |        |        |        |        |        |        |        |               |
| SARS-CoV-2 NC_045512.2 | (29904)  | -----                                                                                              |        |        |        |        |        |        |        |               |
|                        |          |                                                                                                    |        |        |        |        |        |        |        | Section 1299  |
|                        | (124609) | 124609                                                                                             | 124619 | 124630 | 124641 | 124652 | 124663 | 124674 | 124685 | 124704        |
| T4 NC 000866.4         | (123875) | GAATTTACAAGTCCTTCATCAGTTTTATCAATAGAAACGCTTAAACGCTTTTCGTCTGGTAAACACCTATAGATGAATCAGTCATCCAAGTACCA    |        |        |        |        |        |        |        |               |
| SARS-CoV-2 NC_045512.2 | (29904)  | -----                                                                                              |        |        |        |        |        |        |        |               |
|                        |          |                                                                                                    |        |        |        |        |        |        |        | Section 1300  |
|                        | (124705) | 124705                                                                                             | 124718 | 124729 | 124740 | 124751 | 124762 | 124773 | 124784 | 124800        |
| T4 NC 000866.4         | (123971) | AAAATATTTGGATATAATGATGTTGACACAAAGTTTCTAAAATAAAAACTCGATTTTTTACCATTGCTTCGTATATTGAAGGTAACATTTCGTTGT   |        |        |        |        |        |        |        |               |
| SARS-CoV-2 NC_045512.2 | (29904)  | -----                                                                                              |        |        |        |        |        |        |        |               |
|                        |          |                                                                                                    |        |        |        |        |        |        |        | Section 1301  |
|                        | (124801) | 124801 124806                                                                                      | 124817 | 124828 | 124839 | 124850 | 124861 | 124872 | 124883 | 124896        |
| T4 NC 000866.4         | (124067) | GAACGATACAAAGTAATACCTTTTGGTAATCGTTCACCATTTTTAAAGGCTGAATCTAAATTATCAATAGCTTTTTCTATGTGAGATGCTGTCAAA   |        |        |        |        |        |        |        |               |
| SARS-CoV-2 NC_045512.2 | (29904)  | -----                                                                                              |        |        |        |        |        |        |        |               |
|                        |          |                                                                                                    |        |        |        |        |        |        |        | Section 1302  |
|                        | (124897) | 124897                                                                                             | 124905 | 124916 | 124927 | 124938 | 124949 | 124960 | 124971 | 124992        |
| T4 NC 000866.4         | (124163) | ATACTTGTCACGCTCATCTGGATTATATAATCCCAAAGAGCATTATTTATGTCTACATATCCTGAACCTACGTATTCACGAATTCGCGTTTTTGC    |        |        |        |        |        |        |        |               |
| SARS-CoV-2 NC_045512.2 | (29904)  | -----                                                                                              |        |        |        |        |        |        |        |               |

## SARS-CoV-2 &amp; T4.apr

|                        |          |                                                                                                  |        |        |        |        |        |        |        |               |
|------------------------|----------|--------------------------------------------------------------------------------------------------|--------|--------|--------|--------|--------|--------|--------|---------------|
|                        |          |                                                                                                  |        |        |        |        |        |        |        | Section 1303  |
|                        | (124993) | 124993                                                                                           | 125004 | 125015 | 125026 | 125037 | 125048 | 125059 | 125070 | 125088        |
| T4 NC 000866.4         | (124259) | GCTGGTGTGATTTAGATGAATCTTTATTTTCGACTATAGGATGTAATGACCATCCAGCGGTAAGAGCATATCCACGTAATTCTCTTCGAATAATC  |        |        |        |        |        |        |        |               |
| SARS-CoV-2 NC_045512.2 | (29904)  | -----                                                                                            |        |        |        |        |        |        |        |               |
|                        |          |                                                                                                  |        |        |        |        |        |        |        | Section 1304  |
|                        | (125089) | 125089                                                                                           | 125103 | 125114 | 125125 | 125136 | 125147 | 125158 | 125169 | 125184        |
| T4 NC 000866.4         | (124355) | TTTGTTTTTATTGCATTCCAAGAATTTTGTACTAACTCATTTCAGCATCTTGGTTTAAATGCGAATGTTTGTTAATATTTCTTTCAAACCAAGCA  |        |        |        |        |        |        |        |               |
| SARS-CoV-2 NC_045512.2 | (29904)  | -----                                                                                            |        |        |        |        |        |        |        |               |
|                        |          |                                                                                                  |        |        |        |        |        |        |        | Section 1305  |
|                        | (125185) | 125185                                                                                           | 125191 | 125202 | 125213 | 125224 | 125235 | 125246 | 125257 | 125268 125280 |
| T4 NC 000866.4         | (124451) | CCCTTATATTTTTCTAAAGTATCATCGACGATAGAAGCAATAGTTTCTAAGGTTTTATTGAAGTAATAGATTCTTTTCGTAATCTTTCTAAAGCT  |        |        |        |        |        |        |        |               |
| SARS-CoV-2 NC_045512.2 | (29904)  | -----                                                                                            |        |        |        |        |        |        |        |               |
|                        |          |                                                                                                  |        |        |        |        |        |        |        | Section 1306  |
|                        | (125281) | 125281                                                                                           | 125290 | 125301 | 125312 | 125323 | 125334 | 125345 | 125356 | 125376        |
| T4 NC 000866.4         | (124547) | TTATTTTTTATTTCTGCGTTAATAATGGATTCTTTATCTTCAGGAATTATAGAAGCTTCTCTGAATGCCATCCCAGCTGTAACACTGCTAAGAGCA |        |        |        |        |        |        |        |               |
| SARS-CoV-2 NC_045512.2 | (29904)  | -----                                                                                            |        |        |        |        |        |        |        |               |
|                        |          |                                                                                                  |        |        |        |        |        |        |        | Section 1307  |
|                        | (125377) | 125377                                                                                           | 125389 | 125400 | 125411 | 125422 | 125433 | 125444 | 125455 | 125472        |
| T4 NC 000866.4         | (124643) | TTCTCTAGTGCAAATCCTGAAGTAGAAATTACCGTTAATTCATTAGAATCAGAAATTAAAGGCGCGTCCGCTGGTTTATTTAATTCGGCCGCTGAA |        |        |        |        |        |        |        |               |
| SARS-CoV-2 NC_045512.2 | (29904)  | -----                                                                                            |        |        |        |        |        |        |        |               |
|                        |          |                                                                                                  |        |        |        |        |        |        |        | Section 1308  |
|                        | (125473) | 125473                                                                                           | 125488 | 125499 | 125510 | 125521 | 125532 | 125543 | 125554 | 125568        |
| T4 NC 000866.4         | (124739) | GCCTCAAATTTTTGAAACATTGGTGTTCAAATCTAGAAGATTCCAATGACTGACTTTGCGCAATTGCTCTACGGGAAATTTTAACTTTAACGATT  |        |        |        |        |        |        |        |               |
| SARS-CoV-2 NC_045512.2 | (29904)  | -----                                                                                            |        |        |        |        |        |        |        |               |
|                        |          |                                                                                                  |        |        |        |        |        |        |        | Section 1309  |
|                        | (125569) | 125569                                                                                           | 125576 | 125587 | 125598 | 125609 | 125620 | 125631 | 125642 | 125653 125664 |
| T4 NC 000866.4         | (124835) | ACAGCTTGGTCAGAACGTTTATCATTTTCTTGCGCAATAGATGCTGCAATTGCCTCATTTTTAGTTACTTGAGCCCCAGTATCTTTATTGATATAA |        |        |        |        |        |        |        |               |
| SARS-CoV-2 NC_045512.2 | (29904)  | -----                                                                                            |        |        |        |        |        |        |        |               |

## SARS-CoV-2 &amp; T4.apr

|                        |          |                                                                                                   |        |        |        |        |        |        |        |               |
|------------------------|----------|---------------------------------------------------------------------------------------------------|--------|--------|--------|--------|--------|--------|--------|---------------|
|                        |          |                                                                                                   |        |        |        |        |        |        |        | Section 1310  |
|                        | (125665) | 125665                                                                                            | 125675 | 125686 | 125697 | 125708 | 125719 | 125730 | 125741 | 125760        |
| T4 NC 000866.4         | (124931) | ACATCACCGACCTTCGATTCAACTTTAGTAAAGAGCTCGGTACTAATTTCCGGAACCTCTGGAATGTCTTCTAGTGATACATTTTTGCGATGTATA  |        |        |        |        |        |        |        |               |
| SARS-CoV-2 NC_045512.2 | (29904)  | -----                                                                                             |        |        |        |        |        |        |        |               |
|                        |          |                                                                                                   |        |        |        |        |        |        |        | Section 1311  |
|                        | (125761) | 125761                                                                                            | 125774 | 125785 | 125796 | 125807 | 125818 | 125829 | 125840 | 125856        |
| T4 NC 000866.4         | (125077) | AGAATATATGCATACTTTTTATCGTAATCCCAGAGTTCCCTTAAGAAGGACGTATCTACCACCTGAACGACTACGGATAAGTCTATCAGCAATAACT |        |        |        |        |        |        |        |               |
| SARS-CoV-2 NC_045512.2 | (29904)  | -----                                                                                             |        |        |        |        |        |        |        |               |
|                        |          |                                                                                                   |        |        |        |        |        |        |        | Section 1312  |
|                        | (125857) | 125857                                                                                            | 125862 | 125873 | 125884 | 125895 | 125906 | 125917 | 125928 | 125939 125952 |
| T4 NC 000866.4         | (125123) | TGAATTTGTCGAGCTTGGCCAGCAGTTTTAGACTTAAGAATACGGAGCATACAGGCATCAATTTTATACTGGCGCATTGTTTGCATTGCAACAGTA  |        |        |        |        |        |        |        |               |
| SARS-CoV-2 NC_045512.2 | (29904)  | -----                                                                                             |        |        |        |        |        |        |        |               |
|                        |          |                                                                                                   |        |        |        |        |        |        |        | Section 1313  |
|                        | (125953) | 125953                                                                                            | 125961 | 125972 | 125983 | 125994 | 126005 | 126016 | 126027 | 126048        |
| T4 NC 000866.4         | (125219) | AAACTGAATTGATATAATTAATTGGGCTTGGACCAAGACCTTTTAATTTAGCAATTGAACCTTTAGCAGTTAATGTAAAAGGAACAATATGCATC   |        |        |        |        |        |        |        |               |
| SARS-CoV-2 NC_045512.2 | (29904)  | -----                                                                                             |        |        |        |        |        |        |        |               |
|                        |          |                                                                                                   |        |        |        |        |        |        |        | Section 1314  |
|                        | (126049) | 126049                                                                                            | 126060 | 126071 | 126082 | 126093 | 126104 | 126115 | 126126 | 126144        |
| T4 NC 000866.4         | (125315) | ATTTTATCGCCCATCTTTAAATCACGATTAGTATCACCTCCAGATGTATAGGTACATAAACGAAAGCCTGGTTGTTCAATTGCATCATCAACATGA  |        |        |        |        |        |        |        |               |
| SARS-CoV-2 NC_045512.2 | (29904)  | -----                                                                                             |        |        |        |        |        |        |        |               |
|                        |          |                                                                                                   |        |        |        |        |        |        |        | Section 1315  |
|                        | (126145) | 126145                                                                                            | 126159 | 126170 | 126181 | 126192 | 126203 | 126214 | 126225 | 126240        |
| T4 NC 000866.4         | (125411) | ACTGAAAAAATTTGCGGTATTTCTTCTTTGGATATAAGTTTGTAATTGGAAGAGTAGTATCTTCGTCAAATAATTCTGTAATAAGTTCCATCATA   |        |        |        |        |        |        |        |               |
| SARS-CoV-2 NC_045512.2 | (29904)  | -----                                                                                             |        |        |        |        |        |        |        |               |
|                        |          |                                                                                                   |        |        |        |        |        |        |        | Section 1316  |
|                        | (126241) | 126241                                                                                            | 126247 | 126258 | 126269 | 126280 | 126291 | 126302 | 126313 | 126324 126336 |
| T4 NC 000866.4         | (125507) | TCCTCTCTAGTGTTTATTCTATTCTATTTATAAAATTAAAGGCCCGAAGGCCTTTAATAATCTATTGGTAAGAGAGTACGATATATTTCAAACTTT  |        |        |        |        |        |        |        |               |
| SARS-CoV-2 NC_045512.2 | (29904)  | -----                                                                                             |        |        |        |        |        |        |        |               |

## SARS-CoV-2 &amp; T4.apr

|                        |          |                                                                                                   |        |        |        |        |        |        |        |               |
|------------------------|----------|---------------------------------------------------------------------------------------------------|--------|--------|--------|--------|--------|--------|--------|---------------|
|                        |          |                                                                                                   |        |        |        |        |        |        |        | Section 1317  |
|                        | (126337) | 126337                                                                                            | 126346 | 126357 | 126368 | 126379 | 126390 | 126401 | 126412 | 126432        |
| T4 NC 000866.4         | (125603) | GGACCTTTTTCATAAGCATCAAATGTTTCTGTGAATTTATTATAAGCATATGCATCTATAAATTCAATCATGATTTGTGATACAGAAGTAGAAACA  |        |        |        |        |        |        |        |               |
| SARS-CoV-2 NC_045512.2 | (29904)  | -----                                                                                             |        |        |        |        |        |        |        |               |
|                        |          |                                                                                                   |        |        |        |        |        |        |        | Section 1318  |
|                        | (126433) | 126433                                                                                            | 126445 | 126456 | 126467 | 126478 | 126489 | 126500 | 126511 | 126528        |
| T4 NC 000866.4         | (125699) | TCTCCACCTTCTTTTGTAGCCACGACAATTGTTTCTAAGTAAGCTTTCATAGACCAGTTACCTCATGAAAATCACCAAATACATCTTCGAATGTAT  |        |        |        |        |        |        |        |               |
| SARS-CoV-2 NC_045512.2 | (29904)  | -----                                                                                             |        |        |        |        |        |        |        |               |
|                        |          |                                                                                                   |        |        |        |        |        |        |        | Section 1319  |
|                        | (126529) | 126529                                                                                            | 126544 | 126555 | 126566 | 126577 | 126588 | 126599 | 126610 | 126624        |
| T4 NC 000866.4         | (125795) | TAGCTTTAGTTTTATCTTCACGTAAACGAATCGCAATCGGAAGAAATAATTTAACGTAATCAGTGCGGCCATCAGATTTTAACCAACCGTTGCATT  |        |        |        |        |        |        |        |               |
| SARS-CoV-2 NC_045512.2 | (29904)  | -----                                                                                             |        |        |        |        |        |        |        |               |
|                        |          |                                                                                                   |        |        |        |        |        |        |        | Section 1320  |
|                        | (126625) | 126625                                                                                            | 126632 | 126643 | 126654 | 126665 | 126676 | 126687 | 126698 | 126709 126720 |
| T4 NC 000866.4         | (125891) | CGCACTCTAGAATTTTCCAATATAATAATTTTGGTTTTCCATAATGCGAGTACGGTCAAGTTCATGCGATTTTACACCGGCTTTATCTTTTAAGC   |        |        |        |        |        |        |        |               |
| SARS-CoV-2 NC_045512.2 | (29904)  | -----                                                                                             |        |        |        |        |        |        |        |               |
|                        |          |                                                                                                   |        |        |        |        |        |        |        | Section 1321  |
|                        | (126721) | 126721                                                                                            | 126731 | 126742 | 126753 | 126764 | 126775 | 126786 | 126797 | 126816        |
| T4 NC 000866.4         | (125987) | CTGAACCAGCATTTACCTTAATTTTCCACACTCTGACTCAAGAATAAATCCACCCGCTTTAGTAGGGTCTTTACGGTGAGGATAAATTCCTACAA   |        |        |        |        |        |        |        |               |
| SARS-CoV-2 NC_045512.2 | (29904)  | -----                                                                                             |        |        |        |        |        |        |        |               |
|                        |          |                                                                                                   |        |        |        |        |        |        |        | Section 1322  |
|                        | (126817) | 126817                                                                                            | 126830 | 126841 | 126852 | 126863 | 126874 | 126885 | 126896 | 126912        |
| T4 NC 000866.4         | (126083) | TTTTTAAATCAACATCAATTACTTCTTTAAATTTATAAAGATTTTTTGAACGAGCATTTTCCATAATCCATCGATATTTTTGAGAATAATACCTT   |        |        |        |        |        |        |        |               |
| SARS-CoV-2 NC_045512.2 | (29904)  | -----                                                                                             |        |        |        |        |        |        |        |               |
|                        |          |                                                                                                   |        |        |        |        |        |        |        | Section 1323  |
|                        | (126913) | 126913                                                                                            | 126918 | 126929 | 126940 | 126951 | 126962 | 126973 | 126984 | 126995 127008 |
| T4 NC 000866.4         | (126179) | CAAGACCTTGGTCAATATACTTTTTATAAATTACCTTAGCTTCATCTAGGTTATTTACTACCTGGTTTTCAATTAATAATTACTTTATCATATCCAG |        |        |        |        |        |        |        |               |
| SARS-CoV-2 NC_045512.2 | (29904)  | -----                                                                                             |        |        |        |        |        |        |        |               |

## SARS-CoV-2 &amp; T4.apr

|                        |          |                                                                                                    |        |        |        |        |        |        |        |               |
|------------------------|----------|----------------------------------------------------------------------------------------------------|--------|--------|--------|--------|--------|--------|--------|---------------|
|                        |          |                                                                                                    |        |        |        |        |        |        |        | Section 1324  |
|                        | (127009) | 127009                                                                                             | 127017 | 127028 | 127039 | 127050 | 127061 | 127072 | 127083 | 127104        |
| T4 NC 000866.4         | (126275) | ATGTCATTTGTTCTAGTTTAGAAAAACGTACATCATATTTCAAACGAAATGCAGGAAGACTGTATATTTCTACCAACGGGACATAATCCCAGACCT   |        |        |        |        |        |        |        |               |
| SARS-CoV-2 NC_045512.2 | (29904)  | -----                                                                                              |        |        |        |        |        |        |        |               |
|                        |          |                                                                                                    |        |        |        |        |        |        |        | Section 1325  |
|                        | (127105) | 127105                                                                                             | 127116 | 127127 | 127138 | 127149 | 127160 | 127171 | 127182 | 127200        |
| T4 NC 000866.4         | (126371) | GAAACTTCATGCATTGTGCTTCTTTTTCAGAAATGGTTCCCTTTAAAGATTTATTGGCGATTCCATTAGAAGCAGTACGTGATTTCAGCTACTTCGG  |        |        |        |        |        |        |        |               |
| SARS-CoV-2 NC_045512.2 | (29904)  | -----                                                                                              |        |        |        |        |        |        |        |               |
|                        |          |                                                                                                    |        |        |        |        |        |        |        | Section 1326  |
|                        | (127201) | 127201                                                                                             | 127215 | 127226 | 127237 | 127248 | 127259 | 127270 | 127281 | 127296        |
| T4 NC 000866.4         | (126467) | CGAATTCTTTAGCTTTACTGTTTTTCAGGATAAGCATCAAAAAGAAAATCTAGGCCTTCTGGCTCCTTTTTAACTTGCTCATGGTATACCAATTTCGC |        |        |        |        |        |        |        |               |
| SARS-CoV-2 NC_045512.2 | (29904)  | -----                                                                                              |        |        |        |        |        |        |        |               |
|                        |          |                                                                                                    |        |        |        |        |        |        |        | Section 1327  |
|                        | (127297) | 127297                                                                                             | 127303 | 127314 | 127325 | 127336 | 127347 | 127358 | 127369 | 127380 127392 |
| T4 NC 000866.4         | (126563) | CATCAATCAACACACCTTCTGGATGAATCTGGCGGGCTTCAGCGGTCATTTTAATTAACCTCTTCCTTAAGAAGATCTAATCCTAGATATTCATTAC  |        |        |        |        |        |        |        |               |
| SARS-CoV-2 NC_045512.2 | (29904)  | -----                                                                                              |        |        |        |        |        |        |        |               |
|                        |          |                                                                                                    |        |        |        |        |        |        |        | Section 1328  |
|                        | (127393) | 127393                                                                                             | 127402 | 127413 | 127424 | 127435 | 127446 | 127457 | 127468 | 127488        |
| T4 NC 000866.4         | (126659) | CAGCTCGTGATAAAAGACGAACATCATCTAATTCATCACCTCTAACTTCAGCAAAACACCGAGCTCCATCAGCTTTTAACTGAGCAAAGGCTGGAA   |        |        |        |        |        |        |        |               |
| SARS-CoV-2 NC_045512.2 | (29904)  | -----                                                                                              |        |        |        |        |        |        |        |               |
|                        |          |                                                                                                    |        |        |        |        |        |        |        | Section 1329  |
|                        | (127489) | 127489                                                                                             | 127501 | 127512 | 127523 | 127534 | 127545 | 127556 | 127567 | 127584        |
| T4 NC 000866.4         | (126755) | ATTTGATATTCTTATTAATGCCTTTTTCATCATAAGAACTTGCGAGCATTTGAGGTTGTTTCAGGAATTAAACCTGGCCAAACTTTGTTTGCAATAG  |        |        |        |        |        |        |        |               |
| SARS-CoV-2 NC_045512.2 | (29904)  | -----                                                                                              |        |        |        |        |        |        |        |               |
|                        |          |                                                                                                    |        |        |        |        |        |        |        | Section 1330  |
|                        | (127585) | 127585                                                                                             | 127600 | 127611 | 127622 | 127633 | 127644 | 127655 | 127666 | 127680        |
| T4 NC 000866.4         | (126851) | ATACTGAAGCACCATTC AAGGTCTCGCATCATCACTCGACGCAAACTTCAACATCATCTTTTTTACCATCGGTGATATATCCAGTTAATTCCT     |        |        |        |        |        |        |        |               |
| SARS-CoV-2 NC_045512.2 | (29904)  | -----                                                                                              |        |        |        |        |        |        |        |               |

## SARS-CoV-2 &amp; T4.apr

|                        |          |                                                                                                      |        |        |        |        |        |        |        |               |
|------------------------|----------|------------------------------------------------------------------------------------------------------|--------|--------|--------|--------|--------|--------|--------|---------------|
|                        |          |                                                                                                      |        |        |        |        |        |        |        | Section 1331  |
|                        | (127681) | 127681                                                                                               | 127688 | 127699 | 127710 | 127721 | 127732 | 127743 | 127754 | 127765 127776 |
| T4 NC 000866.4         | (126947) | CAATTGCTGCATTTCCAGTCAATTTCCGAGTAGCTAATGTGAATTCAATGAAGTCAAGCATATCGGTAAGAGTCAACATTCCAAAACCTCTGGGTAG    |        |        |        |        |        |        |        |               |
| SARS-CoV-2 NC_045512.2 | (29904)  | -----                                                                                                |        |        |        |        |        |        |        |               |
|                        |          |                                                                                                      |        |        |        |        |        |        |        | Section 1332  |
|                        | (127777) | 127777                                                                                               | 127787 | 127798 | 127809 | 127820 | 127831 | 127842 | 127853 | 127872        |
| T4 NC 000866.4         | (127043) | CAATACCAGGTTTAGGCCATTTCTTGATATAATACTGTAACCCACGAGAATAAGTCAGACGATATACTCGTTTAAGCAATTCATTATCTTTATTCT     |        |        |        |        |        |        |        |               |
| SARS-CoV-2 NC_045512.2 | (29904)  | -----                                                                                                |        |        |        |        |        |        |        |               |
|                        |          |                                                                                                      |        |        |        |        |        |        |        | Section 1333  |
|                        | (127873) | 127873                                                                                               | 127886 | 127897 | 127908 | 127919 | 127930 | 127941 | 127952 | 127968        |
| T4 NC 000866.4         | (127139) | TTTCAAGAATTGCTTGCTTCTGTTTAGTTGAACCAATAGATGCTATTTTCGTTTCAAGATTTTAAAGAATCATTGTTTCATCCTTTAGAGTTTGGTTTAC |        |        |        |        |        |        |        |               |
| SARS-CoV-2 NC_045512.2 | (29904)  | -----                                                                                                |        |        |        |        |        |        |        |               |
|                        |          |                                                                                                      |        |        |        |        |        |        |        | Section 1334  |
|                        | (127969) | 127969                                                                                               | 127974 | 127985 | 127996 | 128007 | 128018 | 128029 | 128040 | 128051 128064 |
| T4 NC 000866.4         | (127235) | AGCTCTATTATAAAATCAATTCATCATTAAGCTCAGTCAAAGACCTGTGGTACGTGGTTCTAACTTTATTTCTTGCATCCAGTGCTTGATATAAAT     |        |        |        |        |        |        |        |               |
| SARS-CoV-2 NC_045512.2 | (29904)  | -----                                                                                                |        |        |        |        |        |        |        |               |
|                        |          |                                                                                                      |        |        |        |        |        |        |        | Section 1335  |
|                        | (128065) | 128065                                                                                               | 128073 | 128084 | 128095 | 128106 | 128117 | 128128 | 128139 | 128160        |
| T4 NC 000866.4         | (127331) | GAAACCTTGCTCTACACATTTTTTAAAAAATTCGTTTCGTCTTTTTTGAGCTCGGAATTCTGGATTGCATCTAAAAAATTGATTTACGTGACCGTAATC  |        |        |        |        |        |        |        |               |
| SARS-CoV-2 NC_045512.2 | (29904)  | -----                                                                                                |        |        |        |        |        |        |        |               |
|                        |          |                                                                                                      |        |        |        |        |        |        |        | Section 1336  |
|                        | (128161) | 128161                                                                                               | 128172 | 128183 | 128194 | 128205 | 128216 | 128227 | 128238 | 128256        |
| T4 NC 000866.4         | (127427) | ACGTGTAGTATTACCTTCATTTTCATAAATAGTGTGAACAACAAACATTAGAATGCTCCTTGAAAAATATTATCACCACAAGTAGGTCTATTATAC     |        |        |        |        |        |        |        |               |
| SARS-CoV-2 NC_045512.2 | (29904)  | -----                                                                                                |        |        |        |        |        |        |        |               |
|                        |          |                                                                                                      |        |        |        |        |        |        |        | Section 1337  |
|                        | (128257) | 128257                                                                                               | 128271 | 128282 | 128293 | 128304 | 128315 | 128326 | 128337 | 128352        |
| T4 NC 000866.4         | (127523) | AAATACTCTATACCGCCGGGCTTAATATAGTTCCATGTCTGAAACGGATGCGTCTGATATGGATGATATGGATTATAAGGATTAAATCCAGGAGTT     |        |        |        |        |        |        |        |               |
| SARS-CoV-2 NC_045512.2 | (29904)  | -----                                                                                                |        |        |        |        |        |        |        |               |

## SARS-CoV-2 &amp; T4.apr

|                        |          |                                                                                                   |        |        |        |        |        |        |        |               |
|------------------------|----------|---------------------------------------------------------------------------------------------------|--------|--------|--------|--------|--------|--------|--------|---------------|
| Section 1338           |          |                                                                                                   |        |        |        |        |        |        |        |               |
|                        | (128353) | 128353                                                                                            | 128359 | 128370 | 128381 | 128392 | 128403 | 128414 | 128425 | 128436 128448 |
| T4 NC 000866.4         | (127619) | CTCCAGGTAGTGTTCCAAGGAAAAGAATCGTTTTTAATCATCTTTTCAATTACATCTTTTATAGCTTTTTCACTATCAAAACTTTCTTTATTTTCC  |        |        |        |        |        |        |        |               |
| SARS-CoV-2 NC_045512.2 | (29904)  | -----                                                                                             |        |        |        |        |        |        |        |               |
| Section 1339           |          |                                                                                                   |        |        |        |        |        |        |        |               |
|                        | (128449) | 128449                                                                                            | 128458 | 128469 | 128480 | 128491 | 128502 | 128513 | 128524 | 128544        |
| T4 NC 000866.4         | (127715) | TTTGGTGAAAAAAGCTTATTCTCTACATCGTTCCATGTATAAACTCGCTGAGCAGTTTTTGGAAATATTGTCACGCTCTCCTCGAGCCATCCAATAC |        |        |        |        |        |        |        |               |
| SARS-CoV-2 NC_045512.2 | (29904)  | -----                                                                                             |        |        |        |        |        |        |        |               |
| Section 1340           |          |                                                                                                   |        |        |        |        |        |        |        |               |
|                        | (128545) | 128545                                                                                            | 128557 | 128568 | 128579 | 128590 | 128601 | 128612 | 128623 | 128640        |
| T4 NC 000866.4         | (127811) | ACAGGAACACGTAATATTTCACTCGCGTGATCGCAGTGGTGAGCGAGATCGTCAATATAACAAATTACGTTATATTTCTCTTTTGCTTTTTTGAAC  |        |        |        |        |        |        |        |               |
| SARS-CoV-2 NC_045512.2 | (29904)  | -----                                                                                             |        |        |        |        |        |        |        |               |
| Section 1341           |          |                                                                                                   |        |        |        |        |        |        |        |               |
|                        | (128641) | 128641                                                                                            | 128656 | 128667 | 128678 | 128689 | 128700 | 128711 | 128722 | 128736        |
| T4 NC 000866.4         | (127907) | AACTCTTCTTTTGAAGAATCATGACTACACATCAGTACTTCTGAGAAAGCACCAGGAAAAAGAGCATTCAAATTAAATTGACGATTTAATAGAGCG  |        |        |        |        |        |        |        |               |
| SARS-CoV-2 NC_045512.2 | (29904)  | -----                                                                                             |        |        |        |        |        |        |        |               |
| Section 1342           |          |                                                                                                   |        |        |        |        |        |        |        |               |
|                        | (128737) | 128737                                                                                            | 128744 | 128755 | 128766 | 128777 | 128788 | 128799 | 128810 | 128821 128832 |
| T4 NC 000866.4         | (128003) | TCAATAGAATCACCCAATGCTGTAACAGCAACAAAATTATAATCTTCTTTTAATTTGTTAATTACACACAGAGCATCTTTATATGGAGACAAGTAA  |        |        |        |        |        |        |        |               |
| SARS-CoV-2 NC_045512.2 | (29904)  | -----                                                                                             |        |        |        |        |        |        |        |               |
| Section 1343           |          |                                                                                                   |        |        |        |        |        |        |        |               |
|                        | (128833) | 128833                                                                                            | 128843 | 128854 | 128865 | 128876 | 128887 | 128898 | 128909 | 128928        |
| T4 NC 000866.4         | (128099) | CGAATAAAATCCGAACGATTGTATTTTTCAATTAACCTTGACGCCAAGTTCTTCATCACAGTTAAAGAGTTTACCAGGAGAAATAAATTTCTCATCT |        |        |        |        |        |        |        |               |
| SARS-CoV-2 NC_045512.2 | (29904)  | -----                                                                                             |        |        |        |        |        |        |        |               |
| Section 1344           |          |                                                                                                   |        |        |        |        |        |        |        |               |
|                        | (128929) | 128929                                                                                            | 128942 | 128953 | 128964 | 128975 | 128986 | 128997 | 129008 | 129024        |
| T4 NC 000866.4         | (128195) | TGGATCATTTTTTAAATATGTTCTAACGGAAGATTATATTTCTGAGCAAAATAAGGAAGGCCTGATTGCCAGCTTAAACATACTCCATCAATATCA  |        |        |        |        |        |        |        |               |
| SARS-CoV-2 NC_045512.2 | (29904)  | -----                                                                                             |        |        |        |        |        |        |        |               |



## SARS-CoV-2 &amp; T4.apr

|                                |                                                                                                   |        |        |        |        |        |        |        |        |        |
|--------------------------------|---------------------------------------------------------------------------------------------------|--------|--------|--------|--------|--------|--------|--------|--------|--------|
| Section 1345                   |                                                                                                   |        |        |        |        |        |        |        |        |        |
| (129025)                       | 129025                                                                                            | 129030 | 129041 | 129052 | 129063 | 129074 | 129085 | 129096 | 129107 | 129120 |
| T4 NC 000866.4 (128291)        | GTTAAAATAGTAGGCTTCATAGAGAGTCTCTTAATAGGTTTAACACATCAATAAATTCAGCTTCGGTTAGTATTGTATCATCTTTTGTAGACCAC   |        |        |        |        |        |        |        |        |        |
| SARS-CoV-2 NC_045512.2 (29904) | -----                                                                                             |        |        |        |        |        |        |        |        |        |
| Section 1346                   |                                                                                                   |        |        |        |        |        |        |        |        |        |
| (129121)                       | 129121                                                                                            | 129129 | 129140 | 129151 | 129162 | 129173 | 129184 | 129195 |        | 129216 |
| T4 NC 000866.4 (128387)        | TAGCAATGCTGTGCTTCAAACTTTTCCTTTTCGAGGCTTGTAATGCATCACGAAAGCCCTTGTTTTGAATCGCTGCTTCAAAATATGCATTTGTGT  |        |        |        |        |        |        |        |        |        |
| SARS-CoV-2 NC_045512.2 (29904) | -----                                                                                             |        |        |        |        |        |        |        |        |        |
| Section 1347                   |                                                                                                   |        |        |        |        |        |        |        |        |        |
| (129217)                       | 129217                                                                                            | 129228 | 129239 | 129250 | 129261 | 129272 | 129283 | 129294 |        | 129312 |
| T4 NC 000866.4 (128483)        | ATAATTCTTTCCACGCCGGGAGTATCTTGAAAACGGAACCTCCAAGCCAAAAGAGGGTCCCACGGTCTGAGCTCTAGCATAAGACCTTCCAGCTT   |        |        |        |        |        |        |        |        |        |
| SARS-CoV-2 NC_045512.2 (29904) | -----                                                                                             |        |        |        |        |        |        |        |        |        |
| Section 1348                   |                                                                                                   |        |        |        |        |        |        |        |        |        |
| (129313)                       | 129313                                                                                            | 129327 | 129338 | 129349 | 129360 | 129371 | 129382 | 129393 |        | 129408 |
| T4 NC 000866.4 (128579)        | GTTGGGCGGCAAGCCCGGATAACCCAAATATACGACGTTGTTGTTCAACATTTTTCACCTTACACCCTTGAGGAATCCTTCAAGACCTCCAAATT   |        |        |        |        |        |        |        |        |        |
| SARS-CoV-2 NC_045512.2 (29904) | -----                                                                                             |        |        |        |        |        |        |        |        |        |
| Section 1349                   |                                                                                                   |        |        |        |        |        |        |        |        |        |
| (129409)                       | 129409                                                                                            | 129415 | 129426 | 129437 | 129448 | 129459 | 129470 | 129481 | 129492 | 129504 |
| T4 NC 000866.4 (128675)        | GAATACCATCCATAACGAAAGGCCATTGGGCGAAATTACTTAATGCACATGATGGCCACCTAAAATTGCTTCTAATCTCTAACTCAGACATTTTCA  |        |        |        |        |        |        |        |        |        |
| SARS-CoV-2 NC_045512.2 (29904) | -----                                                                                             |        |        |        |        |        |        |        |        |        |
| Section 1350                   |                                                                                                   |        |        |        |        |        |        |        |        |        |
| (129505)                       | 129505                                                                                            | 129514 | 129525 | 129536 | 129547 | 129558 | 129569 | 129580 |        | 129600 |
| T4 NC 000866.4 (128771)        | ATGCTTATAATTTCAACATCAGCCCAATGACCATAGCAAGGAAGACGAAATTCAACTGGCCAGTTAGGGTCCCTTTCTAATATAATAGACTCAACT  |        |        |        |        |        |        |        |        |        |
| SARS-CoV-2 NC_045512.2 (29904) | -----                                                                                             |        |        |        |        |        |        |        |        |        |
| Section 1351                   |                                                                                                   |        |        |        |        |        |        |        |        |        |
| (129601)                       | 129601                                                                                            | 129613 | 129624 | 129635 | 129646 | 129657 | 129668 | 129679 |        | 129696 |
| T4 NC 000866.4 (128867)        | TGTGGTTCTTCGTGTTTCATCAGTATACGGATTTTTATCTGTTACTTTATATGTGACCTTAATGTACTGAATTCCAAAAATCTTATTAATTATATTC |        |        |        |        |        |        |        |        |        |
| SARS-CoV-2 NC_045512.2 (29904) | -----                                                                                             |        |        |        |        |        |        |        |        |        |

## SARS-CoV-2 &amp; T4.apr

|                        |          |                                                                                                   |        |        |        |        |        |        |        |               |
|------------------------|----------|---------------------------------------------------------------------------------------------------|--------|--------|--------|--------|--------|--------|--------|---------------|
|                        |          |                                                                                                   |        |        |        |        |        |        |        | Section 1352  |
|                        | (129697) | 129697                                                                                            | 129712 | 129723 | 129734 | 129745 | 129756 | 129767 | 129778 | 129792        |
| T4 NC_000866.4         | (128963) | ATACTAATTCCTTTAATCCGTAGATAGGAGATAATTCATCACCCATACGAAGGTCTTCATTTCCATCTACCCAGGAAACAATATAAGCCTCTTTTA  |        |        |        |        |        |        |        |               |
| SARS-CoV-2 NC_045512.2 | (29904)  | -----                                                                                             |        |        |        |        |        |        |        |               |
|                        |          |                                                                                                   |        |        |        |        |        |        |        | Section 1353  |
|                        | (129793) | 129793                                                                                            | 129800 | 129811 | 129822 | 129833 | 129844 | 129855 | 129866 | 129877 129888 |
| T4 NC_000866.4         | (129059) | TTTGAATACCACTCCATTTAAATGGAGGTAGAACCCTTAGAAATTAATCCAGGTATACCAACTCCCTTTAATTCAACAGTTTGACCTAAAAAGAATT |        |        |        |        |        |        |        |               |
| SARS-CoV-2 NC_045512.2 | (29904)  | -----                                                                                             |        |        |        |        |        |        |        |               |
|                        |          |                                                                                                   |        |        |        |        |        |        |        | Section 1354  |
|                        | (129889) | 129889                                                                                            | 129899 | 129910 | 129921 | 129932 | 129943 | 129954 | 129965 | 129984        |
| T4 NC_000866.4         | (129155) | TCATTAGAACCCTCATCTGAAAACCGTGCGATTTAACATTACCGCCGCCAATATCAGAAATGTTAATTTACGCGCAATTGAAGGGTCAATGTCAAT  |        |        |        |        |        |        |        |               |
| SARS-CoV-2 NC_045512.2 | (29904)  | -----                                                                                             |        |        |        |        |        |        |        |               |
|                        |          |                                                                                                   |        |        |        |        |        |        |        | Section 1355  |
|                        | (129985) | 129985                                                                                            | 129998 | 130009 | 130020 | 130031 | 130042 | 130053 | 130064 | 130080        |
| T4 NC_000866.4         | (129251) | TTCACGATTGAGTTTAGTGATAGCTAAAGTATCACGCCCATTTACAGTACGGAACCTCTAAAGGACAAACCACATCAACGTAGTTTTTAATCGATT  |        |        |        |        |        |        |        |               |
| SARS-CoV-2 NC_045512.2 | (29904)  | -----                                                                                             |        |        |        |        |        |        |        |               |
|                        |          |                                                                                                   |        |        |        |        |        |        |        | Section 1356  |
|                        | (130081) | 130081                                                                                            | 130086 | 130097 | 130108 | 130119 | 130130 | 130141 | 130152 | 130163 130176 |
| T4 NC_000866.4         | (129347) | GCTAGTAAGTTGCAAAATGTGCAGGAAGGTCTTTAGGTGCCTTTGAGAAAACCACTTCACAGAAATTTTTCGCGGTATCAAATAAGTAGTCATAAA  |        |        |        |        |        |        |        |               |
| SARS-CoV-2 NC_045512.2 | (29904)  | -----                                                                                             |        |        |        |        |        |        |        |               |
|                        |          |                                                                                                   |        |        |        |        |        |        |        | Section 1357  |
|                        | (130177) | 130177                                                                                            | 130185 | 130196 | 130207 | 130218 | 130229 | 130240 | 130251 | 130272        |
| T4 NC_000866.4         | (129443) | CATAATATTTTCCTCAGTAAGGGGCTGAAGCCCTCATTTTATTTTAAATATCAAATTCATTAAGAACTACATCAAAGATTGCTTCAAGATGCTCA   |        |        |        |        |        |        |        |               |
| SARS-CoV-2 NC_045512.2 | (29904)  | -----                                                                                             |        |        |        |        |        |        |        |               |
|                        |          |                                                                                                   |        |        |        |        |        |        |        | Section 1358  |
|                        | (130273) | 130273                                                                                            | 130284 | 130295 | 130306 | 130317 | 130328 | 130339 | 130350 | 130368        |
| T4 NC_000866.4         | (129539) | GGTTTAGCTCTGTTACTCAGAAATATGACGAATCCAAGTTTTAACTAAGAGTTTACGATTAGCACCATTCCAGCAAGGATGAGTCCCTAAATCGCGT |        |        |        |        |        |        |        |               |
| SARS-CoV-2 NC_045512.2 | (29904)  | -----                                                                                             |        |        |        |        |        |        |        |               |

## SARS-CoV-2 &amp; T4.apr

|                        |          |                                                                                                    |        |        |        |        |        |        |        |
|------------------------|----------|----------------------------------------------------------------------------------------------------|--------|--------|--------|--------|--------|--------|--------|
|                        |          | Section 1359                                                                                       |        |        |        |        |        |        |        |
|                        | (130369) | 130369                                                                                             | 130383 | 130394 | 130405 | 130416 | 130427 | 130438 | 130449 |
| T4 NC 000866.4         | (129635) | TGGCGGAAATCATCATCCAGAGCGATTTTGAAGTTGGAACCTTTTCATCGTGATTGAAACCGTGATACCGTTTTCAAATCGCATATAAACGTTAGTTA |        |        |        |        |        |        |        |
| SARS-CoV-2 NC_045512.2 | (29904)  | -----                                                                                              |        |        |        |        |        |        |        |
|                        |          | Section 1360                                                                                       |        |        |        |        |        |        |        |
|                        | (130465) | 130465                                                                                             | 130471 | 130482 | 130493 | 130504 | 130515 | 130526 | 130537 |
| T4 NC 000866.4         | (129731) | GGAGTCATATACTGTTCAATTTTCGCATACTGATCCATTTTGATGTTTCCAGAGGCAAATAGTATCAATAGAACCTGCAATACCATTAGAAACATAT  |        |        |        |        |        |        |        |
| SARS-CoV-2 NC_045512.2 | (29904)  | -----                                                                                              |        |        |        |        |        |        |        |
|                        |          | Section 1361                                                                                       |        |        |        |        |        |        |        |
|                        | (130561) | 130561                                                                                             | 130570 | 130581 | 130592 | 130603 | 130614 | 130625 | 130636 |
| T4 NC 000866.4         | (129827) | TTACGTTCAAAGTTAATGTAGTTCATTTTTATTCTCCGAGATGTTTAATTGCGGTACAGGTATATAATATCATATCCTGTACCAAAGTAAACAATT   |        |        |        |        |        |        |        |
| SARS-CoV-2 NC_045512.2 | (29904)  | -----                                                                                              |        |        |        |        |        |        |        |
|                        |          | Section 1362                                                                                       |        |        |        |        |        |        |        |
|                        | (130657) | 130657                                                                                             | 130669 | 130680 | 130691 | 130702 | 130713 | 130724 | 130735 |
| T4 NC 000866.4         | (129923) | ATTTTACTACTTTCCAATGCTGCATGTCAAGTTTACCAACTTTTTTCATCTTCTCAATTAAGCGTTCTGCACGTTGGCGAGCTGTAACATAATGCC   |        |        |        |        |        |        |        |
| SARS-CoV-2 NC_045512.2 | (29904)  | -----                                                                                              |        |        |        |        |        |        |        |
|                        |          | Section 1363                                                                                       |        |        |        |        |        |        |        |
|                        | (130753) | 130753                                                                                             | 130768 | 130779 | 130790 | 130801 | 130812 | 130823 | 130834 |
| T4 NC 000866.4         | (130019) | ATTCGCCTAATTCATTTTGTTCATTTTCCAACGATTACTGTATTCAATTCATAAATCCAACCAGTAAAGAAATTATGAACCTGAATTGTAAAGG     |        |        |        |        |        |        |        |
| SARS-CoV-2 NC_045512.2 | (29904)  | -----                                                                                              |        |        |        |        |        |        |        |
|                        |          | Section 1364                                                                                       |        |        |        |        |        |        |        |
|                        | (130849) | 130849                                                                                             | 130856 | 130867 | 130878 | 130889 | 130900 | 130911 | 130922 |
| T4 NC 000866.4         | (130115) | TGAAATCTGTTCCCATACCTTCTGTTGTTTCTACTTCAATAATATCACCTTCAACTGCCATTAAGAACCACATAGTTTCATCATATTTACCATTGA   |        |        |        |        |        |        |        |
| SARS-CoV-2 NC_045512.2 | (29904)  | -----                                                                                              |        |        |        |        |        |        |        |
|                        |          | Section 1365                                                                                       |        |        |        |        |        |        |        |
|                        | (130945) | 130945                                                                                             | 130955 | 130966 | 130977 | 130988 | 130999 | 131010 | 131021 |
| T4 NC 000866.4         | (130211) | AGCATTTAGTTTTAACTGCAGCGTTCAGATTAATCGTTTTTCATTTTATTCTCCTTTGTTTGTGTAAGATAATACTATCACAAAGGAACCTATACTGT |        |        |        |        |        |        |        |
| SARS-CoV-2 NC_045512.2 | (29904)  | -----                                                                                              |        |        |        |        |        |        |        |

## SARS-CoV-2 &amp; T4.apr

|                        |          |                                                                                                     |        |        |        |        |        |        |        |              |        |
|------------------------|----------|-----------------------------------------------------------------------------------------------------|--------|--------|--------|--------|--------|--------|--------|--------------|--------|
|                        |          |                                                                                                     |        |        |        |        |        |        |        | Section 1366 |        |
|                        | (131041) | 131041                                                                                              | 131054 | 131065 | 131076 | 131087 | 131098 | 131109 | 131120 | 131136       |        |
| T4 NC_000866.4         | (130307) | AAACAAC TTTGTGCAATCTTTGGAAAAATAAAAAAGGACTCCCGAAGGAGTCCTCAACTTATGCTTTCTGCTTACCAAACGAGAAGCATCATCTCG   |        |        |        |        |        |        |        |              |        |
| SARS-CoV-2 NC_045512.2 | (29904)  | -----                                                                                               |        |        |        |        |        |        |        |              |        |
|                        |          |                                                                                                     |        |        |        |        |        |        |        | Section 1367 |        |
|                        | (131137) | 131137                                                                                              | 131142 | 131153 | 131164 | 131175 | 131186 | 131197 | 131208 | 131219       | 131232 |
| T4 NC_000866.4         | (130403) | AAGAACC GCACGTGCTCGGCGCATGATCTTCTCAACAGTTTGATTGATACGAGAGTTTCGACCCACGCTTGTTAGCCAGCGCGTTTAGAATCACCAAC |        |        |        |        |        |        |        |              |        |
| SARS-CoV-2 NC_045512.2 | (29904)  | -----                                                                                               |        |        |        |        |        |        |        |              |        |
|                        |          |                                                                                                     |        |        |        |        |        |        |        | Section 1368 |        |
|                        | (131233) | 131233                                                                                              | 131241 | 131252 | 131263 | 131274 | 131285 | 131296 | 131307 | 131328       |        |
| T4 NC_000866.4         | (130499) | TTTCTTTTCAACTGCTTTCTTTGCTTTAGCTTGTTTTGCCATTATAAAATTCTCTTTTAAATGAAAATGCAGGACTTATTGGCATTGCCTGCGCAAG   |        |        |        |        |        |        |        |              |        |
| SARS-CoV-2 NC_045512.2 | (29904)  | -----                                                                                               |        |        |        |        |        |        |        |              |        |
|                        |          |                                                                                                     |        |        |        |        |        |        |        | Section 1369 |        |
|                        | (131329) | 131329                                                                                              | 131340 | 131351 | 131362 | 131373 | 131384 | 131395 | 131406 | 131424       |        |
| T4 NC_000866.4         | (130595) | CCCTCAAGGGGAACATAGGTTTTTGGATATTTAACGACCAGGATAACCATAAAACCCGTCATCATTACATTCAAGAGGTACACCGTAAACTGTCTG    |        |        |        |        |        |        |        |              |        |
| SARS-CoV-2 NC_045512.2 | (29904)  | -----                                                                                               |        |        |        |        |        |        |        |              |        |
|                        |          |                                                                                                     |        |        |        |        |        |        |        | Section 1370 |        |
|                        | (131425) | 131425                                                                                              | 131439 | 131450 | 131461 | 131472 | 131483 | 131494 | 131505 | 131520       |        |
| T4 NC_000866.4         | (130691) | GGGTCTTAAAACTATAATGATTCGCAAAATCATTAATCAGACAGTTTCGACGGCTCCTCGATTTAGCTCACACTAAGGCAGTGAATCTCCAATAAATT  |        |        |        |        |        |        |        |              |        |
| SARS-CoV-2 NC_045512.2 | (29904)  | -----                                                                                               |        |        |        |        |        |        |        |              |        |
|                        |          |                                                                                                     |        |        |        |        |        |        |        | Section 1371 |        |
|                        | (131521) | 131521                                                                                              | 131527 | 131538 | 131549 | 131560 | 131571 | 131582 | 131593 | 131604       | 131616 |
| T4 NC_000866.4         | (130787) | ACTTCAGTGTTACCACAAAGTGACGAACTGCTTTTCGTGCAGCAGAAGCCAGAGGCTTAGCATATTTAAGTTCATCTTTTTCTGAAGCTCAGCAG     |        |        |        |        |        |        |        |              |        |
| SARS-CoV-2 NC_045512.2 | (29904)  | -----                                                                                               |        |        |        |        |        |        |        |              |        |
|                        |          |                                                                                                     |        |        |        |        |        |        |        | Section 1372 |        |
|                        | (131617) | 131617                                                                                              | 131626 | 131637 | 131648 | 131659 | 131670 | 131681 | 131692 | 131712       |        |
| T4 NC_000866.4         | (130883) | CTAATGCAGTTTGAGCAGGATTCAGATGTTTGAAATAACGCAGGATTTCAAGAGCTTCGGCTTCAACATCAATAGATGCGCCATAGTTTTTCGTGAC   |        |        |        |        |        |        |        |              |        |
| SARS-CoV-2 NC_045512.2 | (29904)  | -----                                                                                               |        |        |        |        |        |        |        |              |        |

## SARS-CoV-2 &amp; T4.apr

|                        |          |                                                                                                      |        |        |        |        |        |        |        |               |
|------------------------|----------|------------------------------------------------------------------------------------------------------|--------|--------|--------|--------|--------|--------|--------|---------------|
|                        |          |                                                                                                      |        |        |        |        |        |        |        | Section 1373  |
|                        | (131713) | 131713                                                                                               | 131725 | 131736 | 131747 | 131758 | 131769 | 131780 | 131791 | 131808        |
| T4 NC_000866.4         | (130979) | CATTATTCCATGCGTTTCGTTGCAGTTCAAGAGCGTGTGTAATTGTTTAATCATTAAAAATTCTCGTTAGAGATTAAACTCGGTAGTCACGTT        |        |        |        |        |        |        |        |               |
| SARS-CoV-2 NC_045512.2 | (29904)  | -----                                                                                                |        |        |        |        |        |        |        |               |
|                        |          |                                                                                                      |        |        |        |        |        |        |        | Section 1374  |
|                        | (131809) | 131809                                                                                               | 131824 | 131835 | 131846 | 131857 | 131868 | 131879 | 131890 | 131904        |
| T4 NC_000866.4         | (131075) | CTTCTGAATTTTCATCTTCTTCGACAGATCTCTCAGTTGTAGACTACCACATAGAATTGTTTCGGTTAACTTATTATTCCGACACCCAATTCATATT    |        |        |        |        |        |        |        |               |
| SARS-CoV-2 NC_045512.2 | (29904)  | -----                                                                                                |        |        |        |        |        |        |        |               |
|                        |          |                                                                                                      |        |        |        |        |        |        |        | Section 1375  |
|                        | (131905) | 131905                                                                                               | 131912 | 131923 | 131934 | 131945 | 131956 | 131967 | 131978 | 131989 132000 |
| T4 NC_000866.4         | (131171) | ATTATTTATATCACTTATAAAGACACGGAATAGCTTTATAGTGACAGGTAACGAATTTTGTTTAATTTCTTTTGGCTGCTTAAGACCCAGAGCTA      |        |        |        |        |        |        |        |               |
| SARS-CoV-2 NC_045512.2 | (29904)  | -----                                                                                                |        |        |        |        |        |        |        |               |
|                        |          |                                                                                                      |        |        |        |        |        |        |        | Section 1376  |
|                        | (132001) | 132001                                                                                               | 132011 | 132022 | 132033 | 132044 | 132055 | 132066 | 132077 | 132096        |
| T4 NC_000866.4         | (131267) | CAAAAGGATGCGGAACATTTTGAATTTGACCAACTGGAAGAGAAGTCAAATCACCAACTTCGCAGAAACCTTCAGGAACATCAGGACCGACAGAGT     |        |        |        |        |        |        |        |               |
| SARS-CoV-2 NC_045512.2 | (29904)  | -----                                                                                                |        |        |        |        |        |        |        |               |
|                        |          |                                                                                                      |        |        |        |        |        |        |        | Section 1377  |
|                        | (132097) | 132097                                                                                               | 132110 | 132121 | 132132 | 132143 | 132154 | 132165 | 132176 | 132192        |
| T4 NC_000866.4         | (131363) | GAACACACACAGTTTCAGGAACCTTCACCTTGAACACGTTTACCGATAATAAGTCCTGATTCTGTAACCTTCTTCATCACC GGCTTGTGCAGGTT CAG |        |        |        |        |        |        |        |               |
| SARS-CoV-2 NC_045512.2 | (29904)  | -----                                                                                                |        |        |        |        |        |        |        |               |
|                        |          |                                                                                                      |        |        |        |        |        |        |        | Section 1378  |
|                        | (132193) | 132193                                                                                               | 132198 | 132209 | 132220 | 132231 | 132242 | 132253 | 132264 | 132275 132288 |
| T4 NC_000866.4         | (131459) | AACTAAATAACATATTCACCGACAGCACGAATTGGTAGCTGTTGTACTTCAGACATCGTTTTTCTTTTGTTAACAGATGAATTAATAATAAC         |        |        |        |        |        |        |        |               |
| SARS-CoV-2 NC_045512.2 | (29904)  | -----                                                                                                |        |        |        |        |        |        |        |               |
|                        |          |                                                                                                      |        |        |        |        |        |        |        | Section 1379  |
|                        | (132289) | 132289                                                                                               | 132297 | 132308 | 132319 | 132330 | 132341 | 132352 | 132363 | 132384        |
| T4 NC_000866.4         | (131555) | AAATAGTTCTTAAAGCATTTATTTACCAATAAATTGAAGCAAATGCTCAACTTTCATACCATTAAACGGAATCAATTTGTCAATAGAAAAACCTCG     |        |        |        |        |        |        |        |               |
| SARS-CoV-2 NC_045512.2 | (29904)  | -----                                                                                                |        |        |        |        |        |        |        |               |

## SARS-CoV-2 &amp; T4.apr

|                        |          |                                                                                                    |        |        |        |        |        |        |        |               |
|------------------------|----------|----------------------------------------------------------------------------------------------------|--------|--------|--------|--------|--------|--------|--------|---------------|
|                        |          |                                                                                                    |        |        |        |        |        |        |        | Section 1380  |
|                        | (132385) | 132385                                                                                             | 132396 | 132407 | 132418 | 132429 | 132440 | 132451 | 132462 | 132480        |
| T4 NC 000866.4         | (131651) | CCACGCACCAAGCTCAACATCAAATACTGGAATCATGTCAGTAGATTCTTTCCGAGTAGATTCAGTCAATTTGCCAGTTTGCATGGTTGGCATAAA   |        |        |        |        |        |        |        |               |
| SARS-CoV-2 NC_045512.2 | (29904)  | -----                                                                                              |        |        |        |        |        |        |        |               |
|                        |          |                                                                                                    |        |        |        |        |        |        |        | Section 1381  |
|                        | (132481) | 132481                                                                                             | 132495 | 132506 | 132517 | 132528 | 132539 | 132550 | 132561 | 132576        |
| T4 NC 000866.4         | (131747) | GTCTGCATCACGAGTACCTTTCATAGTACGAATAGTACCATCAGACTTTTCAAAAACCTACGTTTGAAACACCCATGGACAATTTAGTTTTTCAAAAT |        |        |        |        |        |        |        |               |
| SARS-CoV-2 NC_045512.2 | (29904)  | -----                                                                                              |        |        |        |        |        |        |        |               |
|                        |          |                                                                                                    |        |        |        |        |        |        |        | Section 1382  |
|                        | (132577) | 132577                                                                                             | 132583 | 132594 | 132605 | 132616 | 132627 | 132638 | 132649 | 132672        |
| T4 NC 000866.4         | (131843) | TTCACGAATTGCTACTTTCTGCTCAGTTGTCAGTTTCATTTATTTACCTATTACAGTTTTAATATGAGTTGTTCCACGTTCTTTAAGGGTGGAAAG   |        |        |        |        |        |        |        |               |
| SARS-CoV-2 NC_045512.2 | (29904)  | -----                                                                                              |        |        |        |        |        |        |        |               |
|                        |          |                                                                                                    |        |        |        |        |        |        |        | Section 1383  |
|                        | (132673) | 132673                                                                                             | 132682 | 132693 | 132704 | 132715 | 132726 | 132737 | 132748 | 132768        |
| T4 NC 000866.4         | (131939) | TAATTTTTTGGCATTTCCTAAATCAGATTTCCAACCTATATGGTCTATCAATACAAACCCAATTTGTCTTATAATACTGTTTCCATTTAGAGAAAAA  |        |        |        |        |        |        |        |               |
| SARS-CoV-2 NC_045512.2 | (29904)  | -----                                                                                              |        |        |        |        |        |        |        |               |
|                        |          |                                                                                                    |        |        |        |        |        |        |        | Section 1384  |
|                        | (132769) | 132769                                                                                             | 132781 | 132792 | 132803 | 132814 | 132825 | 132836 | 132847 | 132864        |
| T4 NC 000866.4         | (132035) | ATATTTCTTATACTCTACAGCAAATGAGATGTTCTCGTTAGAATAAGAACTAATTGCTGTGAGTTTACCACAAACGAAATTTTCATTATTCACCACAG |        |        |        |        |        |        |        |               |
| SARS-CoV-2 NC_045512.2 | (29904)  | -----                                                                                              |        |        |        |        |        |        |        |               |
|                        |          |                                                                                                    |        |        |        |        |        |        |        | Section 1385  |
|                        | (132865) | 132865                                                                                             | 132880 | 132891 | 132902 | 132913 | 132924 | 132935 | 132946 | 132960        |
| T4 NC 000866.4         | (132131) | AATTCGTTGATATTTTCCCAGTTTAACTTATTCAAGTTTTTCTTAGGAACATTAAACACTTCAATACCTGCATTTTCGCAGAATATCATCCCAACCG  |        |        |        |        |        |        |        |               |
| SARS-CoV-2 NC_045512.2 | (29904)  | -----                                                                                              |        |        |        |        |        |        |        |               |
|                        |          |                                                                                                    |        |        |        |        |        |        |        | Section 1386  |
|                        | (132961) | 132961                                                                                             | 132968 | 132979 | 132990 | 133001 | 133012 | 133023 | 133034 | 133045 133056 |
| T4 NC 000866.4         | (132227) | GGTTTATTTTTGTCGTATGTTTCACAATAAACAGCTTTTTAATACCAGATTGAGCTATCGCTTTTGCGCAATCTGGACAAGGAGAAAGTGTTACA    |        |        |        |        |        |        |        |               |
| SARS-CoV-2 NC_045512.2 | (29904)  | -----                                                                                              |        |        |        |        |        |        |        |               |

## SARS-CoV-2 &amp; T4.apr

|                        |          |                                                                                                    |        |        |        |        |        |        |        |              |
|------------------------|----------|----------------------------------------------------------------------------------------------------|--------|--------|--------|--------|--------|--------|--------|--------------|
|                        |          |                                                                                                    |        |        |        |        |        |        |        | Section 1387 |
|                        | (133057) | 133057                                                                                             | 133067 | 133078 | 133089 | 133100 | 133111 | 133122 | 133133 | 133152       |
| T4 NC 000866.4         | (132323) | TACATAGTAGCACCTTCAATAGAAGAACCATTTCGTGCAGCAAACAAAATTGCATTTAGTTTCAGCATGAATTTTCATTTTTAGATGACCATTCCGAG |        |        |        |        |        |        |        |              |
| SARS-CoV-2 NC_045512.2 | (29904)  | -----                                                                                              |        |        |        |        |        |        |        |              |
|                        |          |                                                                                                    |        |        |        |        |        |        |        | Section 1388 |
|                        | (133153) | 133153                                                                                             | 133166 | 133177 | 133188 | 133199 | 133210 | 133221 | 133232 | 133248       |
| T4 NC 000866.4         | (132419) | TGAGCACTACGATGTTCTTTGCGCCAAAACAAAACGATCAGTTGAACCAAATGATACGCATTTCAGGCTTATGACCTTGAATGATAGCATGTTTAGGC |        |        |        |        |        |        |        |              |
| SARS-CoV-2 NC_045512.2 | (29904)  | -----                                                                                              |        |        |        |        |        |        |        |              |
|                        |          |                                                                                                    |        |        |        |        |        |        |        | Section 1389 |
|                        | (133249) | 133249                                                                                             | 133254 | 133265 | 133276 | 133287 | 133298 | 133309 | 133320 | 133344       |
| T4 NC 000866.4         | (132515) | TTATTCAACAACCATCCTTGCTCAGCAGCATAATCACAACAGTTCACACCCCCTGCGGGTGAACCATTATACCCAGTAGAAATAATACGTCCATT    |        |        |        |        |        |        |        |              |
| SARS-CoV-2 NC_045512.2 | (29904)  | -----                                                                                              |        |        |        |        |        |        |        |              |
|                        |          |                                                                                                    |        |        |        |        |        |        |        | Section 1390 |
|                        | (133345) | 133345                                                                                             | 133353 | 133364 | 133375 | 133386 | 133397 | 133408 | 133419 | 133440       |
| T4 NC 000866.4         | (132611) | TTTTCAATTACTGCTCCTACCTTCCAGGAGCAACATTTTGATTCTGCGATACTAAATATGCAATTTGAAGTACTGTACTCGCTTTCATTTTCATAA   |        |        |        |        |        |        |        |              |
| SARS-CoV-2 NC_045512.2 | (29904)  | -----                                                                                              |        |        |        |        |        |        |        |              |
|                        |          |                                                                                                    |        |        |        |        |        |        |        | Section 1391 |
|                        | (133441) | 133441                                                                                             | 133452 | 133463 | 133474 | 133485 | 133496 | 133507 | 133518 | 133536       |
| T4 NC 000866.4         | (132707) | TCACCAGATAAGCAGATTTAGCAGTTTCAACACGATAAAATTTGTCGACGAAGTTTAGTTATACTTTTAATAACAGAACTAATTATATTCTGCCCAT  |        |        |        |        |        |        |        |              |
| SARS-CoV-2 NC_045512.2 | (29904)  | -----                                                                                              |        |        |        |        |        |        |        |              |
|                        |          |                                                                                                    |        |        |        |        |        |        |        | Section 1392 |
|                        | (133537) | 133537                                                                                             | 133551 | 133562 | 133573 | 133584 | 133595 | 133606 | 133617 | 133632       |
| T4 NC 000866.4         | (132803) | CTTTAAAGCGGTTTTTCTTATCAATAAAAACTGCGCCAGTCATCTTTTTGTGAAGCTCAACTGGATACTTCGTCACAATAATAGCATCATAACAG    |        |        |        |        |        |        |        |              |
| SARS-CoV-2 NC_045512.2 | (29904)  | -----                                                                                              |        |        |        |        |        |        |        |              |
|                        |          |                                                                                                    |        |        |        |        |        |        |        | Section 1393 |
|                        | (133633) | 133633                                                                                             | 133639 | 133650 | 133661 | 133672 | 133683 | 133694 | 133705 | 133728       |
| T4 NC 000866.4         | (132899) | AAGGATGAATACTATTACCCAGAGTATCATTCATTAAAGTTATTCTAATGAACTGTGCTGTTTCAGAATCAAGCGCTCTATGATCGCCAGTATCAT   |        |        |        |        |        |        |        |              |
| SARS-CoV-2 NC_045512.2 | (29904)  | -----                                                                                              |        |        |        |        |        |        |        |              |

## SARS-CoV-2 &amp; T4.apr

|                        |          |                                                                                                   |        |        |        |        |        |        |        |               |
|------------------------|----------|---------------------------------------------------------------------------------------------------|--------|--------|--------|--------|--------|--------|--------|---------------|
|                        |          |                                                                                                   |        |        |        |        |        |        |        | Section 1394  |
|                        | (133729) | 133729                                                                                            | 133738 | 133749 | 133760 | 133771 | 133782 | 133793 | 133804 | 133824        |
| T4 NC 000866.4         | (132995) | TTTCAAGACAATTATCAATTATATCAGTTAAATTCATCATAGTACGCCATACACCCTTTGTGCTTCAACTAATCCATCAAAATCCAGTTTAAGATG  |        |        |        |        |        |        |        |               |
| SARS-CoV-2 NC_045512.2 | (29904)  | -----                                                                                             |        |        |        |        |        |        |        |               |
|                        |          |                                                                                                   |        |        |        |        |        |        |        | Section 1395  |
|                        | (133825) | 133825                                                                                            | 133837 | 133848 | 133859 | 133870 | 133881 | 133892 | 133903 | 133920        |
| T4 NC 000866.4         | (133091) | CGATATTTGATCGCCATCACCTGGATTCAACAATTACTAATACTGAACGAGGAGTTTCGGTAATAACACGAACCGATGTTTCAGGAAATCGTTCAGA |        |        |        |        |        |        |        |               |
| SARS-CoV-2 NC_045512.2 | (29904)  | -----                                                                                             |        |        |        |        |        |        |        |               |
|                        |          |                                                                                                   |        |        |        |        |        |        |        | Section 1396  |
|                        | (133921) | 133921                                                                                            | 133936 | 133947 | 133958 | 133969 | 133980 | 133991 | 134002 | 134016        |
| T4 NC 000866.4         | (133187) | AACCTTATTTACTAATTCCTGCGCAAATAGTTTAACTTTTTCTTGGAATTCCTTTAACAGTAATCGGTTTTTCACTTAGCAACATTTTGTTCCT    |        |        |        |        |        |        |        |               |
| SARS-CoV-2 NC_045512.2 | (29904)  | -----                                                                                             |        |        |        |        |        |        |        |               |
|                        |          |                                                                                                   |        |        |        |        |        |        |        | Section 1397  |
|                        | (134017) | 134017                                                                                            | 134024 | 134035 | 134046 | 134057 | 134068 | 134079 | 134090 | 134101 134112 |
| T4 NC 000866.4         | (133283) | CATTTGTTTTGGTAGAGCTATAATATCACAACTCTACCGTAAAGTAAACCATTAAATCGCTTTGAATTCGCGAGTTTGAGATTCAAAGCGAATATC  |        |        |        |        |        |        |        |               |
| SARS-CoV-2 NC_045512.2 | (29904)  | -----                                                                                             |        |        |        |        |        |        |        |               |
|                        |          |                                                                                                   |        |        |        |        |        |        |        | Section 1398  |
|                        | (134113) | 134113                                                                                            | 134123 | 134134 | 134145 | 134156 | 134167 | 134178 | 134189 | 134208        |
| T4 NC 000866.4         | (133379) | GCCTTTGATAACAAGCTCAGCATCAAGACCAAATACGACAATGATATGCGCGGAACCTGGATACAGTGTAATGGCAATAGAATCCACCTGGTCTGG  |        |        |        |        |        |        |        |               |
| SARS-CoV-2 NC_045512.2 | (29904)  | -----                                                                                             |        |        |        |        |        |        |        |               |
|                        |          |                                                                                                   |        |        |        |        |        |        |        | Section 1399  |
|                        | (134209) | 134209                                                                                            | 134222 | 134233 | 134244 | 134255 | 134266 | 134277 | 134288 | 134304        |
| T4 NC 000866.4         | (133475) | AAGCAAAGTGTTCAATACATGAGTCACTTGAGCATGGATTCTGAAGCTCAGCTGCGTTATCAAGTTTTTCAAACATATTATTAGCGATAATTTGGCT |        |        |        |        |        |        |        |               |
| SARS-CoV-2 NC_045512.2 | (29904)  | -----                                                                                             |        |        |        |        |        |        |        |               |
|                        |          |                                                                                                   |        |        |        |        |        |        |        | Section 1400  |
|                        | (134305) | 134305                                                                                            | 134310 | 134321 | 134332 | 134343 | 134354 | 134365 | 134376 | 134387 134400 |
| T4 NC 000866.4         | (133571) | AAACACTACTTCTACGATTTTAGAGTAAGTCGGAAACATATTTACCTCACATAATTTTCTTCAAGCCAATCAATAACATCCAACGCATTATCAAAA  |        |        |        |        |        |        |        |               |
| SARS-CoV-2 NC_045512.2 | (29904)  | -----                                                                                             |        |        |        |        |        |        |        |               |



## SARS-CoV-2 &amp; T4.apr

|                        |          |                                                                                                     |        |        |        |        |        |        |        |              |
|------------------------|----------|-----------------------------------------------------------------------------------------------------|--------|--------|--------|--------|--------|--------|--------|--------------|
|                        |          |                                                                                                     |        |        |        |        |        |        |        | Section 1401 |
|                        | (134401) | 134401                                                                                              | 134409 | 134420 | 134431 | 134442 | 134453 | 134464 | 134475 | 134496       |
| T4 NC 000866.4         | (133667) | GTTGAACCATCTACTCTGTCTTCTGTTTCATAATCAAGAACATCTAGGCCTACTCTCCGTCAACAATAGGCCATAGACAAAATAGATATTTCTTT     |        |        |        |        |        |        |        |              |
| SARS-CoV-2 NC_045512.2 | (29904)  | -----                                                                                               |        |        |        |        |        |        |        |              |
|                        |          |                                                                                                     |        |        |        |        |        |        |        | Section 1402 |
|                        | (134497) | 134497                                                                                              | 134508 | 134519 | 134530 | 134541 | 134552 | 134563 | 134574 | 134592       |
| T4 NC 000866.4         | (133763) | TCTTTTTCAATTTTATCACAAGACGATAAATCTTTTCTAGGTTATTCATAAGTTTTCCATGGTAAAGGCAGTTTAGTTTTCTTTACTACTAGTTCT    |        |        |        |        |        |        |        |              |
| SARS-CoV-2 NC_045512.2 | (29904)  | -----                                                                                               |        |        |        |        |        |        |        |              |
|                        |          |                                                                                                     |        |        |        |        |        |        |        | Section 1403 |
|                        | (134593) | 134593                                                                                              | 134607 | 134618 | 134629 | 134640 | 134651 | 134662 | 134673 | 134688       |
| T4 NC 000866.4         | (133859) | AACATCGGGATTCTTTTCTCTTAATTTAAGACATTCTCTCCCATGCTCTATTTTCTACTAGTAAATACACAAAATTGCCCATTTACTAGTACCAACTAA |        |        |        |        |        |        |        |              |
| SARS-CoV-2 NC_045512.2 | (29904)  | -----                                                                                               |        |        |        |        |        |        |        |              |
|                        |          |                                                                                                     |        |        |        |        |        |        |        | Section 1404 |
|                        | (134689) | 134689                                                                                              | 134695 | 134706 | 134717 | 134728 | 134739 | 134750 | 134761 | 134784       |
| T4 NC 000866.4         | (133955) | ACCGCTATTTACAATAACAATAGCCCAAGTTTCATGGTGCCAAGCCATTAAAAATCTCCCGAAGCGACTTGCCAGCATTCAACACCGGATACGACGC   |        |        |        |        |        |        |        |              |
| SARS-CoV-2 NC_045512.2 | (29904)  | -----                                                                                               |        |        |        |        |        |        |        |              |
|                        |          |                                                                                                     |        |        |        |        |        |        |        | Section 1405 |
|                        | (134785) | 134785                                                                                              | 134794 | 134805 | 134816 | 134827 | 134838 | 134849 | 134860 | 134880       |
| T4 NC 000866.4         | (134051) | CACATTTCAACTACTTGAGTTCGGTCATCAATAGCTAATTTACGTCAAAATGCGGTGCAATGTGTTTCCAGAAAATTTCTTCTTTAACTACATCG     |        |        |        |        |        |        |        |              |
| SARS-CoV-2 NC_045512.2 | (29904)  | -----                                                                                               |        |        |        |        |        |        |        |              |
|                        |          |                                                                                                     |        |        |        |        |        |        |        | Section 1406 |
|                        | (134881) | 134881                                                                                              | 134893 | 134904 | 134915 | 134926 | 134937 | 134948 | 134959 | 134976       |
| T4 NC 000866.4         | (134147) | TCTTTACGGGTATCGCCTTGTTTCGCGCTGACATTGCATAACTAATGGAACGCCAGCAATGTCCTCAACCCATTTACGGGTCATACGATAATATTTCT  |        |        |        |        |        |        |        |              |
| SARS-CoV-2 NC_045512.2 | (29904)  | -----                                                                                               |        |        |        |        |        |        |        |              |
|                        |          |                                                                                                     |        |        |        |        |        |        |        | Section 1407 |
|                        | (134977) | 134977                                                                                              | 134992 | 135003 | 135014 | 135025 | 135036 | 135047 | 135058 | 135072       |
| T4 NC 000866.4         | (134243) | GTTGGGTCTTCTTTAGTTCCACTTTCACGACCTGAAACGACTACGATTTGATAACCCATAAGAGCATACATCTTAGACAGTTCAACAACCATAGGA    |        |        |        |        |        |        |        |              |
| SARS-CoV-2 NC_045512.2 | (29904)  | -----                                                                                               |        |        |        |        |        |        |        |              |

## SARS-CoV-2 &amp; T4.apr

|                        |          |                                                                                                    |        |        |        |        |        |        |        |               |
|------------------------|----------|----------------------------------------------------------------------------------------------------|--------|--------|--------|--------|--------|--------|--------|---------------|
|                        |          |                                                                                                    |        |        |        |        |        |        |        | Section 1408  |
|                        | (135073) | 135073                                                                                             | 135080 | 135091 | 135102 | 135113 | 135124 | 135135 | 135146 | 135157 135168 |
| T4 NC 000866.4         | (134339) | TTGATAACATCGGTATCGCATTTTTCAAGGTCATAAGGACCACGACCATTTCATTTTAGCTAGTGTACCATCAACATCAAAAATAACTGCTTTTGGT  |        |        |        |        |        |        |        |               |
| SARS-CoV-2 NC_045512.2 | (29904)  | -----                                                                                              |        |        |        |        |        |        |        |               |
|                        |          |                                                                                                    |        |        |        |        |        |        |        | Section 1409  |
|                        | (135169) | 135169                                                                                             | 135179 | 135190 | 135201 | 135212 | 135223 | 135234 | 135245 | 135264        |
| T4 NC 000866.4         | (134435) | TTACCAGGAGTCCCATTATATACTGGAAGACCGAGATACTCTCGCATGCTTTTATACATTGAACGTAAACATCAATTGGTACTGCTTTAGTTCCG    |        |        |        |        |        |        |        |               |
| SARS-CoV-2 NC_045512.2 | (29904)  | -----                                                                                              |        |        |        |        |        |        |        |               |
|                        |          |                                                                                                    |        |        |        |        |        |        |        | Section 1410  |
|                        | (135265) | 135265                                                                                             | 135278 | 135289 | 135300 | 135311 | 135322 | 135333 | 135344 | 135360        |
| T4 NC 000866.4         | (134531) | CGTTTTGAGTTACGTTTAACCAATTCAGTCCAAGGAACATCAAACACTTTATGTTCAACTTTCCAGCCGTATTCTTTGGCAAAAGTTTCCCATGCT   |        |        |        |        |        |        |        |               |
| SARS-CoV-2 NC_045512.2 | (29904)  | -----                                                                                              |        |        |        |        |        |        |        |               |
|                        |          |                                                                                                    |        |        |        |        |        |        |        | Section 1411  |
|                        | (135361) | 135361                                                                                             | 135366 | 135377 | 135388 | 135399 | 135410 | 135421 | 135432 | 135443 135456 |
| T4 NC 000866.4         | (134677) | AGGCGACGTTTCAGGATTCAGGTTAGTATCTGAAATGATTACTCCCTTAACAGAATCGCCACCGTACAGAATACTTTTAGCTGTATCAAACATGCATA |        |        |        |        |        |        |        |               |
| SARS-CoV-2 NC_045512.2 | (29904)  | -----                                                                                              |        |        |        |        |        |        |        |               |
|                        |          |                                                                                                    |        |        |        |        |        |        |        | Section 1412  |
|                        | (135457) | 135457                                                                                             | 135465 | 135476 | 135487 | 135498 | 135509 | 135520 | 135531 | 135552        |
| T4 NC 000866.4         | (134723) | CCAGTTACGATACCTTCTTTCTTTTGGTATACTTGTACTCATCGCGTTCTTCATGCGCCATAATAGATTGGCGATAGTCATCACGATTGATATTA    |        |        |        |        |        |        |        |               |
| SARS-CoV-2 NC_045512.2 | (29904)  | -----                                                                                              |        |        |        |        |        |        |        |               |
|                        |          |                                                                                                    |        |        |        |        |        |        |        | Section 1413  |
|                        | (135553) | 135553                                                                                             | 135564 | 135575 | 135586 | 135597 | 135608 | 135619 | 135630 | 135648        |
| T4 NC 000866.4         | (134819) | TAAACCCCGGGATTCTTAGCAATAAATTCACGAGCCCAAGTACTCTTACCAGAACCAGGACAGCCAATAGTCAAAATAATCTTTTTCATTTATTTT   |        |        |        |        |        |        |        |               |
| SARS-CoV-2 NC_045512.2 | (29904)  | -----                                                                                              |        |        |        |        |        |        |        |               |
|                        |          |                                                                                                    |        |        |        |        |        |        |        | Section 1414  |
|                        | (135649) | 135649                                                                                             | 135663 | 135674 | 135685 | 135696 | 135707 | 135718 | 135729 | 135744        |
| T4 NC 000866.4         | (134915) | TTCTCAACTAATGATTGAATATAATCATGTAGGTCTTTAGATGCTTTACCCCACTTATTTTGATATTCATTTTGGAGATTAGCACGTGATTGAGCT   |        |        |        |        |        |        |        |               |
| SARS-CoV-2 NC_045512.2 | (29904)  | -----                                                                                              |        |        |        |        |        |        |        |               |

## SARS-CoV-2 &amp; T4.apr

|                        |          |                                                                                                     |        |        |        |        |        |        |        |        |        |
|------------------------|----------|-----------------------------------------------------------------------------------------------------|--------|--------|--------|--------|--------|--------|--------|--------|--------|
|                        |          | Section 1415                                                                                        |        |        |        |        |        |        |        |        |        |
|                        | (135745) | 135745                                                                                              | 135751 | 135762 | 135773 | 135784 | 135795 | 135806 | 135817 | 135828 | 135840 |
| T4 NC 000866.4         | (135011) | AATAAAACATCATTAGTTGGAGGTAAAGATTCTAACCGCTGAATCTGGCGTCCATAAAATCATTGCAGCCATCTCGGATTCATAAATCAATCCTTTG   |        |        |        |        |        |        |        |        |        |
| SARS-CoV-2 NC_045512.2 | (29904)  | -----                                                                                               |        |        |        |        |        |        |        |        |        |
|                        |          | Section 1416                                                                                        |        |        |        |        |        |        |        |        |        |
|                        | (135841) | 135841                                                                                              | 135850 | 135861 | 135872 | 135883 | 135894 | 135905 | 135916 | 135936 |        |
| T4 NC 000866.4         | (135107) | AGATGTTCAAATTGATGCCATGAAATCATTTACATTTATCCTCTTTTAGCTCTTGACGATAATAACATRTCATAGTTTTCTGGTCATGTACATATC    |        |        |        |        |        |        |        |        |        |
| SARS-CoV-2 NC_045512.2 | (29904)  | -----                                                                                               |        |        |        |        |        |        |        |        |        |
|                        |          | Section 1417                                                                                        |        |        |        |        |        |        |        |        |        |
|                        | (135937) | 135937                                                                                              | 135949 | 135960 | 135971 | 135982 | 135993 | 136004 | 136015 | 136032 |        |
| T4 NC 000866.4         | (135203) | GTTTTACATCATTAAGCCAAATACGAAATTCCTGAGAATCTTCAAATGGCATAACCGACCCAGGCTTTACCATCAATAACTTTAACTTGCCAAGATA   |        |        |        |        |        |        |        |        |        |
| SARS-CoV-2 NC_045512.2 | (29904)  | -----                                                                                               |        |        |        |        |        |        |        |        |        |
|                        |          | Section 1418                                                                                        |        |        |        |        |        |        |        |        |        |
|                        | (136033) | 136033                                                                                              | 136048 | 136059 | 136070 | 136081 | 136092 | 136103 | 136114 | 136128 |        |
| T4 NC 000866.4         | (135299) | GTTTAGCTTCATCATATGACTTTATTTGCACAGGCCAATTAGGATGAACTGTTTCTTTCTTTACTTCTAGAGGCTTTGTGCAACAACCAACTAGAA    |        |        |        |        |        |        |        |        |        |
| SARS-CoV-2 NC_045512.2 | (29904)  | -----                                                                                               |        |        |        |        |        |        |        |        |        |
|                        |          | Section 1419                                                                                        |        |        |        |        |        |        |        |        |        |
|                        | (136129) | 136129                                                                                              | 136136 | 136147 | 136158 | 136169 | 136180 | 136191 | 136202 | 136213 | 136224 |
| T4 NC 000866.4         | (135395) | GACCAATAGATAAATATTACTGCTGATAGTTTAATCATTTAGAAAGGTCCTGGATGTCTTCTGCGAACTTGTTGAAGGAGTTGTTGATTTGTTTTTC   |        |        |        |        |        |        |        |        |        |
| SARS-CoV-2 NC_045512.2 | (29904)  | -----                                                                                               |        |        |        |        |        |        |        |        |        |
|                        |          | Section 1420                                                                                        |        |        |        |        |        |        |        |        |        |
|                        | (136225) | 136225                                                                                              | 136235 | 136246 | 136257 | 136268 | 136279 | 136290 | 136301 | 136320 |        |
| T4 NC 000866.4         | (135491) | AACCAATCCTGGCTTATGAGCCACCACATCCGCCTTCTTTGCATCTTTGCGCAGTTTTTCATTTTCACGCTCAATAGCAGCAATTGCCTCACGATT    |        |        |        |        |        |        |        |        |        |
| SARS-CoV-2 NC_045512.2 | (29904)  | -----                                                                                               |        |        |        |        |        |        |        |        |        |
|                        |          | Section 1421                                                                                        |        |        |        |        |        |        |        |        |        |
|                        | (136321) | 136321                                                                                              | 136334 | 136345 | 136356 | 136367 | 136378 | 136389 | 136400 | 136416 |        |
| T4 NC 000866.4         | (135587) | TTTATTATTTCATCGCATCAATATAATTATACTGAATTCGCAAATTATTTAATGCTAAGGCGTTTTTCATTGGCCGTTTTTGTAATTTTCAGTAACTGA |        |        |        |        |        |        |        |        |        |
| SARS-CoV-2 NC_045512.2 | (29904)  | -----                                                                                               |        |        |        |        |        |        |        |        |        |

## SARS-CoV-2 &amp; T4.apr

|                        |          |                                                                                                     |        |        |        |        |        |        |        |        |              |
|------------------------|----------|-----------------------------------------------------------------------------------------------------|--------|--------|--------|--------|--------|--------|--------|--------|--------------|
|                        |          |                                                                                                     |        |        |        |        |        |        |        |        | Section 1422 |
|                        | (136417) | 136417                                                                                              | 136422 | 136433 | 136444 | 136455 | 136466 | 136477 | 136488 | 136499 | 136512       |
| T4 NC 000866.4         | (135683) | TGTTTCTAATCTTTCTACCTTATGTTTTAAAAATAATAGATGTTCCGCCAAATGCTATTACAAGTAATAGCAATCCAGCTGTAAAATTACTTACATG   |        |        |        |        |        |        |        |        |              |
| SARS-CoV-2 NC_045512.2 | (29904)  | -----                                                                                               |        |        |        |        |        |        |        |        |              |
|                        |          |                                                                                                     |        |        |        |        |        |        |        |        | Section 1423 |
|                        | (136513) | 136513                                                                                              | 136521 | 136532 | 136543 | 136554 | 136565 | 136576 | 136587 |        | 136608       |
| T4 NC 000866.4         | (135779) | CATAAAGTTTTTAATAACCTCTACAATATCGTCTTGAGAAAGACCGTTAATTAAAAATATGATGTTTCAGCTGGAGATTTAGAAATTTTAAAGCATGCC |        |        |        |        |        |        |        |        |              |
| SARS-CoV-2 NC_045512.2 | (29904)  | -----                                                                                               |        |        |        |        |        |        |        |        |              |
|                        |          |                                                                                                     |        |        |        |        |        |        |        |        | Section 1424 |
|                        | (136609) | 136609                                                                                              | 136620 | 136631 | 136642 | 136653 | 136664 | 136675 | 136686 |        | 136704       |
| T4 NC 000866.4         | (135875) | TCAACATCTTCTGCCATATCCGATGCACTACGATTTGGATTACTAATACCAAGGCGATGTTTTCCCGTCAAAGGATTAACGATGATATAGCATTTG    |        |        |        |        |        |        |        |        |              |
| SARS-CoV-2 NC_045512.2 | (29904)  | -----                                                                                               |        |        |        |        |        |        |        |        |              |
|                        |          |                                                                                                     |        |        |        |        |        |        |        |        | Section 1425 |
|                        | (136705) | 136705                                                                                              | 136719 | 136730 | 136741 | 136752 | 136763 | 136774 | 136785 |        | 136800       |
| T4 NC 000866.4         | (135971) | CAGCTATTGATATGAACATTGGGTTGAGTCTGATTAATGAACACTTCACAATCATACTTAGCAAGTTGATTTTCTAAAAAGACTTTCATCTCTTCA    |        |        |        |        |        |        |        |        |              |
| SARS-CoV-2 NC_045512.2 | (29904)  | -----                                                                                               |        |        |        |        |        |        |        |        |              |
|                        |          |                                                                                                     |        |        |        |        |        |        |        |        | Section 1426 |
|                        | (136801) | 136801                                                                                              | 136807 | 136818 | 136829 | 136840 | 136851 | 136862 | 136873 | 136884 | 136896       |
| T4 NC 000866.4         | (136067) | ACCGCATCAGGAAGCATATCACGGGCTTGCTCAAGACGACGATTTTCGATATTCTTTAATGGTCGTTTTCCGCTTGACTTGCTTAGCTAAATCTTTC   |        |        |        |        |        |        |        |        |              |
| SARS-CoV-2 NC_045512.2 | (29904)  | -----                                                                                               |        |        |        |        |        |        |        |        |              |
|                        |          |                                                                                                     |        |        |        |        |        |        |        |        | Section 1427 |
|                        | (136897) | 136897                                                                                              | 136906 | 136917 | 136928 | 136939 | 136950 | 136961 | 136972 |        | 136992       |
| T4 NC 000866.4         | (136163) | TTAAGACCAGTGATATATCCAACCTCGACGATTTTCTTTGAATACAGAAATCCCATCTGTAGTATCACCGTATGCTTCAACGACCATTTTCAGTAGTA  |        |        |        |        |        |        |        |        |              |
| SARS-CoV-2 NC_045512.2 | (29904)  | -----                                                                                               |        |        |        |        |        |        |        |        |              |
|                        |          |                                                                                                     |        |        |        |        |        |        |        |        | Section 1428 |
|                        | (136993) | 136993                                                                                              | 137005 | 137016 | 137027 | 137038 | 137049 | 137060 | 137071 |        | 137088       |
| T4 NC 000866.4         | (136259) | ATAAGTTTGTAATCCATCATAAAGTCCTCATGTTATGTCAGTAAGACTACTATAACACAACACGAGGGACTTGTAACAACCTTAGTATCCTTCTGG    |        |        |        |        |        |        |        |        |              |
| SARS-CoV-2 NC_045512.2 | (29904)  | -----                                                                                               |        |        |        |        |        |        |        |        |              |

## SARS-CoV-2 &amp; T4.apr

|                        |          |                                                                                                   |        |        |        |        |        |        |                      |
|------------------------|----------|---------------------------------------------------------------------------------------------------|--------|--------|--------|--------|--------|--------|----------------------|
|                        |          | Section 1429                                                                                      |        |        |        |        |        |        |                      |
|                        | (137089) | 137089                                                                                            | 137104 | 137115 | 137126 | 137137 | 137148 | 137159 | 137170 137184        |
| T4 NC_000866.4         | (136355) | GATAAAATTTTTTATAATTTTCAAAAAATTCTGTTTCGATTTCACACATGACCTTTTCTTGACTATCGTACCCCTGGTATAAGCTCATGATGATACC |        |        |        |        |        |        |                      |
| SARS-CoV-2 NC_045512.2 | (29904)  | -----                                                                                             |        |        |        |        |        |        |                      |
|                        |          | Section 1430                                                                                      |        |        |        |        |        |        |                      |
|                        | (137185) | 137185                                                                                            | 137192 | 137203 | 137214 | 137225 | 137236 | 137247 | 137258 137269 137280 |
| T4 NC_000866.4         | (136451) | GAACAGGTGATCCATTCCAGCACCTTTAGCAACACCTTGTGCTTCCATTGCATAAGTCTTTCTATCCTTACC GCAATGCTTATTATGACAGTCAAG |        |        |        |        |        |        |                      |
| SARS-CoV-2 NC_045512.2 | (29904)  | -----                                                                                             |        |        |        |        |        |        |                      |
|                        |          | Section 1431                                                                                      |        |        |        |        |        |        |                      |
|                        | (137281) | 137281                                                                                            | 137291 | 137302 | 137313 | 137324 | 137335 | 137346 | 137357 137376        |
| T4 NC_000866.4         | (136547) | AACTAAAAACAGAGCTCGGTCTAAGTACTTCAGATAAGTCGTTTCAAATGCTTCAATTTTTCTGTATGAATATTCATCGTCAGCATAACATTGCTTT |        |        |        |        |        |        |                      |
| SARS-CoV-2 NC_045512.2 | (29904)  | -----                                                                                             |        |        |        |        |        |        |                      |
|                        |          | Section 1432                                                                                      |        |        |        |        |        |        |                      |
|                        | (137377) | 137377                                                                                            | 137390 | 137401 | 137412 | 137423 | 137434 | 137445 | 137456 137472        |
| T4 NC_000866.4         | (136643) | AAGATCATCTGATGCACCATCAATAATAGTCTTAAACAATTTTTCTGGATTATCTAATGAACTTTTGTACTATGAAGAGACACGTACCAGTCAGA   |        |        |        |        |        |        |                      |
| SARS-CoV-2 NC_045512.2 | (29904)  | -----                                                                                             |        |        |        |        |        |        |                      |
|                        |          | Section 1433                                                                                      |        |        |        |        |        |        |                      |
|                        | (137473) | 137473                                                                                            | 137478 | 137489 | 137500 | 137511 | 137522 | 137533 | 137544 137555 137568 |
| T4 NC_000866.4         | (136739) | CTTAATTTTAAAAATGAGAACCATCTTTCATCACAGCAACATAGCCTTCGATGTTTTCTGCATTTTTAGCTTCTTCTATCCATTTAGGGCTATCGAT |        |        |        |        |        |        |                      |
| SARS-CoV-2 NC_045512.2 | (29904)  | -----                                                                                             |        |        |        |        |        |        |                      |
|                        |          | Section 1434                                                                                      |        |        |        |        |        |        |                      |
|                        | (137569) | 137569                                                                                            | 137577 | 137588 | 137599 | 137610 | 137621 | 137632 | 137643 137664        |
| T4 NC_000866.4         | (136835) | TTCGTATCGTTCAACTAGATACGGACGAAGAGTAGCATCTTTATAAATATCATCGTATGAAATGTATTACCCGTTTCGTTTTACGAACATT CAG   |        |        |        |        |        |        |                      |
| SARS-CoV-2 NC_045512.2 | (29904)  | -----                                                                                             |        |        |        |        |        |        |                      |
|                        |          | Section 1435                                                                                      |        |        |        |        |        |        |                      |
|                        | (137665) | 137665                                                                                            | 137676 | 137687 | 137698 | 137709 | 137720 | 137731 | 137742 137760        |
| T4 NC_000866.4         | (136931) | TAAAATAATTTTCATCTCTTGATAAGCAAGAACGATTCTATTCGTCGGGGCAACGAATTGCAAGTTAGCAGTAAATCCATCTTCAGCTAATTCTTT  |        |        |        |        |        |        |                      |
| SARS-CoV-2 NC_045512.2 | (29904)  | -----                                                                                             |        |        |        |        |        |        |                      |

## SARS-CoV-2 &amp; T4.apr

|                        |          |                                                                                                    |        |        |        |        |        |        |        |        |        |
|------------------------|----------|----------------------------------------------------------------------------------------------------|--------|--------|--------|--------|--------|--------|--------|--------|--------|
|                        |          | Section 1436                                                                                       |        |        |        |        |        |        |        |        |        |
|                        | (137761) | 137761                                                                                             | 137775 | 137786 | 137797 | 137808 | 137819 | 137830 | 137841 | 137856 |        |
| T4 NC 000866.4         | (137027) | AAGTCTATCACGCAACCGATGGTGATTAATATTCATCAAAATTCCATTAGCCATTAAAGCCTGCTCAGATTTGATTGAACCCTTTGATTGAACAG    |        |        |        |        |        |        |        |        |        |
| SARS-CoV-2 NC_045512.2 | (29904)  | -----                                                                                              |        |        |        |        |        |        |        |        |        |
|                        |          | Section 1437                                                                                       |        |        |        |        |        |        |        |        |        |
|                        | (137857) | 137857                                                                                             | 137863 | 137874 | 137885 | 137896 | 137907 | 137918 | 137929 | 137940 | 137952 |
| T4 NC 000866.4         | (137123) | AATTTTCATCACCGTCTAAATAAGTTGATACCAAAGACCCGTCTTCTTTTGTTAGAAATATAATCAACATCGTTTAAATCGATATTCATCGTGAACGG |        |        |        |        |        |        |        |        |        |
| SARS-CoV-2 NC_045512.2 | (29904)  | -----                                                                                              |        |        |        |        |        |        |        |        |        |
|                        |          | Section 1438                                                                                       |        |        |        |        |        |        |        |        |        |
|                        | (137953) | 137953                                                                                             | 137962 | 137973 | 137984 | 137995 | 138006 | 138017 | 138028 | 138048 |        |
| T4 NC 000866.4         | (137219) | ATTTTCATTCAAGTTAAAAAACTTTTCCATAGGACGAGAAGCAATTCTTACTGGTTTTTCTCCATCCATTTCAAACATAATTCCACGACATTCTAG   |        |        |        |        |        |        |        |        |        |
| SARS-CoV-2 NC_045512.2 | (29904)  | -----                                                                                              |        |        |        |        |        |        |        |        |        |
|                        |          | Section 1439                                                                                       |        |        |        |        |        |        |        |        |        |
|                        | (138049) | 138049                                                                                             | 138061 | 138072 | 138083 | 138094 | 138105 | 138116 | 138127 | 138144 |        |
| T4 NC 000866.4         | (137315) | TGCATCTGGAAGTAACCAATCAGAATAAGATGCATAATTATATGAGAAAATTCTGTAAAGTTCTTCCAGATGCACTTACATCATCTGAGTAAAAAAA  |        |        |        |        |        |        |        |        |        |
| SARS-CoV-2 NC_045512.2 | (29904)  | -----                                                                                              |        |        |        |        |        |        |        |        |        |
|                        |          | Section 1440                                                                                       |        |        |        |        |        |        |        |        |        |
|                        | (138145) | 138145                                                                                             | 138160 | 138171 | 138182 | 138193 | 138204 | 138215 | 138226 | 138240 |        |
| T4 NC 000866.4         | (137411) | CTTACGCTGCGAATCCTTACATAGTTCCATTAAATTGTTAAAAAGTTCTTGCATTGTGTATCCTCTTTTGTGTTTTGAATATAGTACCACACTCCA   |        |        |        |        |        |        |        |        |        |
| SARS-CoV-2 NC_045512.2 | (29904)  | -----                                                                                              |        |        |        |        |        |        |        |        |        |
|                        |          | Section 1441                                                                                       |        |        |        |        |        |        |        |        |        |
|                        | (138241) | 138241                                                                                             | 138248 | 138259 | 138270 | 138281 | 138292 | 138303 | 138314 | 138325 | 138336 |
| T4 NC 000866.4         | (137507) | TGTGGAAGCATCATTTTTTCTTGTGTTGAATATTCCAAGGCGGGTTAAACAGTTTAATGAATAGAGGCTCCTCTAAGTCAATCGTTGCGATTGTCA   |        |        |        |        |        |        |        |        |        |
| SARS-CoV-2 NC_045512.2 | (29904)  | -----                                                                                              |        |        |        |        |        |        |        |        |        |
|                        |          | Section 1442                                                                                       |        |        |        |        |        |        |        |        |        |
|                        | (138337) | 138337                                                                                             | 138347 | 138358 | 138369 | 138380 | 138391 | 138402 | 138413 | 138432 |        |
| T4 NC 000866.4         | (137603) | TTGTACCTAACTCATTTGTCATAGAAAAGATTAAACATTGGCGGGCGTAAATTCAACTTTGCTTCCTTCCTTTAGCGCAGAATGAATTAATGCAG    |        |        |        |        |        |        |        |        |        |
| SARS-CoV-2 NC_045512.2 | (29904)  | -----                                                                                              |        |        |        |        |        |        |        |        |        |

## SARS-CoV-2 &amp; T4.apr

|                        |          |                                                                                                    |        |        |        |        |        |        |        |              |        |
|------------------------|----------|----------------------------------------------------------------------------------------------------|--------|--------|--------|--------|--------|--------|--------|--------------|--------|
|                        |          |                                                                                                    |        |        |        |        |        |        |        | Section 1443 |        |
|                        | (138433) | 138433                                                                                             | 138446 | 138457 | 138468 | 138479 | 138490 | 138501 | 138512 | 138528       |        |
| T4 NC 000866.4         | (137699) | ATTTAGTAGAATCAGACGTTTTGTCTTTGCGGTTAATAGCAGTTCTATAATAGTTTATTCTTTTACGTAAATTTTTAGTTTTTCCAATATAAACAA   |        |        |        |        |        |        |        |              |        |
| SARS-CoV-2 NC_045512.2 | (29904)  | -----                                                                                              |        |        |        |        |        |        |        |              |        |
|                        |          |                                                                                                    |        |        |        |        |        |        |        | Section 1444 |        |
|                        | (138529) | 138529                                                                                             | 138534 | 138545 | 138556 | 138567 | 138578 | 138589 | 138600 | 138611       | 138624 |
| T4 NC 000866.4         | (137795) | GCTCATCATTTTATAGCAATAGCATAAATTACGTTATACTTGTTTGGGAATAGATAATTGTTTTATACTTCCATTGTCGTCTAATTCTAGCTCAGTAT |        |        |        |        |        |        |        |              |        |
| SARS-CoV-2 NC_045512.2 | (29904)  | -----                                                                                              |        |        |        |        |        |        |        |              |        |
|                        |          |                                                                                                    |        |        |        |        |        |        |        | Section 1445 |        |
|                        | (138625) | 138625                                                                                             | 138633 | 138644 | 138655 | 138666 | 138677 | 138688 | 138699 | 138720       |        |
| T4 NC 000866.4         | (137891) | ATTTAATAAAATGAATATTCTGTTGCAATTTCTTTTCATAATAAAATGGGCCTTGCGGCCCACTCCTTAAAAGTATTTTTTAAACTCATCATAACTT  |        |        |        |        |        |        |        |              |        |
| SARS-CoV-2 NC_045512.2 | (29904)  | -----                                                                                              |        |        |        |        |        |        |        |              |        |
|                        |          |                                                                                                    |        |        |        |        |        |        |        | Section 1446 |        |
|                        | (138721) | 138721                                                                                             | 138732 | 138743 | 138754 | 138765 | 138776 | 138787 | 138798 | 138816       |        |
| T4 NC 000866.4         | (137987) | TATCATCAACATCATTATCAATCTGTGCAACAAGGTAAGATGACAGTTCTACTTCTTGCGGCGCGGATTGAACATTATCAGAATTAAGATATTCAC   |        |        |        |        |        |        |        |              |        |
| SARS-CoV-2 NC_045512.2 | (29904)  | -----                                                                                              |        |        |        |        |        |        |        |              |        |
|                        |          |                                                                                                    |        |        |        |        |        |        |        | Section 1447 |        |
|                        | (138817) | 138817                                                                                             | 138831 | 138842 | 138853 | 138864 | 138875 | 138886 | 138897 | 138912       |        |
| T4 NC 000866.4         | (138083) | GAATCCAAGGATATGGATGTTTAACCGGAGCATCGGTAATTGGGCATGGAAGACCGCACTGTTTCATACGAGATACAGTTAAGTAATCAATAAAGC   |        |        |        |        |        |        |        |              |        |
| SARS-CoV-2 NC_045512.2 | (29904)  | -----                                                                                              |        |        |        |        |        |        |        |              |        |
|                        |          |                                                                                                    |        |        |        |        |        |        |        | Section 1448 |        |
|                        | (138913) | 138913                                                                                             | 138919 | 138930 | 138941 | 138952 | 138963 | 138974 | 138985 | 138996       | 139008 |
| T4 NC 000866.4         | (138179) | TCCACATGCTATTTGTATTTAATCCAGGAACATCACCATCTTTAAATAAATGAACTGCCAGTCTTTTTCTGGCGGTTAACTTCCATGAAAATAT     |        |        |        |        |        |        |        |              |        |
| SARS-CoV-2 NC_045512.2 | (29904)  | -----                                                                                              |        |        |        |        |        |        |        |              |        |
|                        |          |                                                                                                    |        |        |        |        |        |        |        | Section 1449 |        |
|                        | (139009) | 139009                                                                                             | 139018 | 139029 | 139040 | 139051 | 139062 | 139073 | 139084 | 139104       |        |
| T4 NC 000866.4         | (138275) | CAACTGCTTCTTGTTTCACACTCTTGGGCAATTTTAACCCATTTCATCACCATCAGTACCGGATTGAAGTTGACGAATAATATATTGGGTGCCTTTAA |        |        |        |        |        |        |        |              |        |
| SARS-CoV-2 NC_045512.2 | (29904)  | -----                                                                                              |        |        |        |        |        |        |        |              |        |

## SARS-CoV-2 &amp; T4.apr

|                        |          |                                                                                                    |        |        |        |        |        |        |        |               |
|------------------------|----------|----------------------------------------------------------------------------------------------------|--------|--------|--------|--------|--------|--------|--------|---------------|
|                        |          |                                                                                                    |        |        |        |        |        |        |        | Section 1450  |
|                        | (139105) | 139105                                                                                             | 139117 | 139128 | 139139 | 139150 | 139161 | 139172 | 139183 | 139200        |
| T4 NC_000866.4         | (138371) | GGTGAAGCTGTTTCATCACGTGCAATGAACCTTCATAATCTTGGCATTACCTTCCATGATTTCCATGTTCTTATGGAAGTTAAAGGTACCGTATGTTT |        |        |        |        |        |        |        |               |
| SARS-CoV-2 NC_045512.2 | (29904)  | -----                                                                                              |        |        |        |        |        |        |        |               |
|                        |          |                                                                                                    |        |        |        |        |        |        |        | Section 1451  |
|                        | (139201) | 139201                                                                                             | 139216 | 139227 | 139238 | 139249 | 139260 | 139271 | 139282 | 139296        |
| T4 NC_000866.4         | (138467) | GATTGAGCTCGCTAATTCTCAACCCGTTCTCTTATGAACTGCTGCATGTTACCATGCAGTCCAGACTATATCACAATCCCGGAGGGATTCTCCCCA   |        |        |        |        |        |        |        |               |
| SARS-CoV-2 NC_045512.2 | (29904)  | -----                                                                                              |        |        |        |        |        |        |        |               |
|                        |          |                                                                                                    |        |        |        |        |        |        |        | Section 1452  |
|                        | (139297) | 139297                                                                                             | 139304 | 139315 | 139326 | 139337 | 139348 | 139359 | 139370 | 139381 139392 |
| T4 NC_000866.4         | (138563) | TTTCGAGTCGCTTGACCCCTACGTCCGAAGACTAGTCGTTGAACCTTGTTTTGCAATTGTCGCCGTGCCATCGTTTATATGTTGATGGTGATAAATC  |        |        |        |        |        |        |        |               |
| SARS-CoV-2 NC_045512.2 | (29904)  | -----                                                                                              |        |        |        |        |        |        |        |               |
|                        |          |                                                                                                    |        |        |        |        |        |        |        | Section 1453  |
|                        | (139393) | 139393                                                                                             | 139403 | 139414 | 139425 | 139436 | 139447 | 139458 | 139469 | 139488        |
| T4 NC_000866.4         | (138659) | TTTCTTATCACAATATGGACAATTCAATTGAATTCTATTTGGATTTAATTTACATCTGTCATTATGTTTTAGATAAAATCCAGGACCTTTACCAAT   |        |        |        |        |        |        |        |               |
| SARS-CoV-2 NC_045512.2 | (29904)  | -----                                                                                              |        |        |        |        |        |        |        |               |
|                        |          |                                                                                                    |        |        |        |        |        |        |        | Section 1454  |
|                        | (139489) | 139489                                                                                             | 139502 | 139513 | 139524 | 139535 | 139546 | 139557 | 139568 | 139584        |
| T4 NC_000866.4         | (138755) | GTGACCACAGAAATCACATGTGATTTCTTTTTGTGCAGGATGGGTCCCGTTCTTAACCATTTCTAATGTTTTTGCTGATGTTCTTTTCTTATGTTT   |        |        |        |        |        |        |        |               |
| SARS-CoV-2 NC_045512.2 | (29904)  | -----                                                                                              |        |        |        |        |        |        |        |               |
|                        |          |                                                                                                    |        |        |        |        |        |        |        | Section 1455  |
|                        | (139585) | 139585                                                                                             | 139590 | 139601 | 139612 | 139623 | 139634 | 139645 | 139656 | 139667 139680 |
| T4 NC_000866.4         | (138851) | TTCCATCAGAATCTTTAGGTATAGGTCCGTTAGCATCTATCCAAATTTTTCTATAGTTCAATTGTGCATCCTCTTAAAAGTATAATCATATTTATA   |        |        |        |        |        |        |        |               |
| SARS-CoV-2 NC_045512.2 | (29904)  | -----                                                                                              |        |        |        |        |        |        |        |               |
|                        |          |                                                                                                    |        |        |        |        |        |        |        | Section 1456  |
|                        | (139681) | 139681                                                                                             | 139689 | 139700 | 139711 | 139722 | 139733 | 139744 | 139755 | 139776        |
| T4 NC_000866.4         | (138947) | TTATACTAATTAAAGGTGCAAGCAAAACCTTGCGTGCTAGTTTTCCATAAAGGACTTTCCAGCAATTAAAGGAGTTTTTCGATAAACGTTACCGTTT  |        |        |        |        |        |        |        |               |
| SARS-CoV-2 NC_045512.2 | (29904)  | -----                                                                                              |        |        |        |        |        |        |        |               |



## SARS-CoV-2 &amp; T4.apr

|                        |          |                                                                                                    |        |        |        |        |        |        |        |               |
|------------------------|----------|----------------------------------------------------------------------------------------------------|--------|--------|--------|--------|--------|--------|--------|---------------|
|                        |          |                                                                                                    |        |        |        |        |        |        |        | Section 1457  |
|                        | (139777) | 139777                                                                                             | 139788 | 139799 | 139810 | 139821 | 139832 | 139843 | 139854 | 139872        |
| T4 NC 000866.4         | (139043) | AAAGGCGCATTTTACGCAAAAGATACATAAAAAACGAATAGCTTCTAAGGCATTAATAACGTGCAAACAGAGGTAAAGAGATTTTCATCAGATCTCGT |        |        |        |        |        |        |        |               |
| SARS-CoV-2 NC_045512.2 | (29904)  | -----                                                                                              |        |        |        |        |        |        |        |               |
|                        |          |                                                                                                    |        |        |        |        |        |        |        | Section 1458  |
|                        | (139873) | 139873                                                                                             | 139887 | 139898 | 139909 | 139920 | 139931 | 139942 | 139953 | 139968        |
| T4 NC 000866.4         | (139139) | TTAGCTCTTTGCTCAACGTCTTTATCAGCTAGAATTAGACCTTGGTCTTTATAATATTCAACCATGTCTTTAGCATTTTCCATTTCACGGGTTTTA   |        |        |        |        |        |        |        |               |
| SARS-CoV-2 NC_045512.2 | (29904)  | -----                                                                                              |        |        |        |        |        |        |        |               |
|                        |          |                                                                                                    |        |        |        |        |        |        |        | Section 1459  |
|                        | (139969) | 139969                                                                                             | 139975 | 139986 | 139997 | 140008 | 140019 | 140030 | 140041 | 140052 140064 |
| T4 NC 000866.4         | (139235) | ACCAAGACATCATCGTAATATCGCCCAATGGACTCAGCACGTTTCATAATAGCTTCATCTAATACAATCTCATCAAACACCTTCGATGGATCAGTA   |        |        |        |        |        |        |        |               |
| SARS-CoV-2 NC_045512.2 | (29904)  | -----                                                                                              |        |        |        |        |        |        |        |               |
|                        |          |                                                                                                    |        |        |        |        |        |        |        | Section 1460  |
|                        | (140065) | 140065                                                                                             | 140074 | 140085 | 140096 | 140107 | 140118 | 140129 | 140140 | 140160        |
| T4 NC 000866.4         | (139331) | TAAAGATTTGCGCATGATATGAGTATATGAACGACTGTGAATAGTTTCACTAAAAGTCCATGTAGCAACCCATGTATCAAGGCTTGGGTCTGAAATT  |        |        |        |        |        |        |        |               |
| SARS-CoV-2 NC_045512.2 | (29904)  | -----                                                                                              |        |        |        |        |        |        |        |               |
|                        |          |                                                                                                    |        |        |        |        |        |        |        | Section 1461  |
|                        | (140161) | 140161                                                                                             | 140173 | 140184 | 140195 | 140206 | 140217 | 140228 | 140239 | 140256        |
| T4 NC 000866.4         | (139427) | AATGACATAAGTACAGCAGATGGCGCACGACCCTGAATGCTATCCAAAAGTGATTGATACTTCAGGTTGTTAGTAAAAATATTTTGCTGATACTGA   |        |        |        |        |        |        |        |               |
| SARS-CoV-2 NC_045512.2 | (29904)  | -----                                                                                              |        |        |        |        |        |        |        |               |
|                        |          |                                                                                                    |        |        |        |        |        |        |        | Section 1462  |
|                        | (140257) | 140257                                                                                             | 140272 | 140283 | 140294 | 140305 | 140316 | 140327 | 140338 | 140352        |
| T4 NC 000866.4         | (139523) | GGAAGCTTATTAAATTGCGCAGCATCCATCATTAAGTTTACTTCTTCAGGACGCCAAAAAACTGATCTGCCGCTCAATGAGTTCTTCAAATACT     |        |        |        |        |        |        |        |               |
| SARS-CoV-2 NC_045512.2 | (29904)  | -----                                                                                              |        |        |        |        |        |        |        |               |
|                        |          |                                                                                                    |        |        |        |        |        |        |        | Section 1463  |
|                        | (140353) | 140353                                                                                             | 140360 | 140371 | 140382 | 140393 | 140404 | 140415 | 140426 | 140437 140448 |
| T4 NC 000866.4         | (139619) | CGATGTCGTTGAATATCATATCGAGCTAAACCTAATCCAGAACCAAAGAACATCGGTTTCATTCAAAACATCAACTGGATTGTATTAAAACTGTA    |        |        |        |        |        |        |        |               |
| SARS-CoV-2 NC_045512.2 | (29904)  | -----                                                                                              |        |        |        |        |        |        |        |               |

## SARS-CoV-2 &amp; T4.apr

|                        |          |                                                                                                    |        |        |        |        |        |        |        |              |        |
|------------------------|----------|----------------------------------------------------------------------------------------------------|--------|--------|--------|--------|--------|--------|--------|--------------|--------|
|                        |          |                                                                                                    |        |        |        |        |        |        |        | Section 1464 |        |
|                        | (140449) | 140449                                                                                             | 140459 | 140470 | 140481 | 140492 | 140503 | 140514 | 140525 | 140544       |        |
| T4 NC 000866.4         | (139715) | CTCATTTAGAATCCTTAAATTTACATTTATCATAATGCCATCTTAAAGCATTGCCTTTATTAACCTTCTTACCACAGTGCGGGCAAGGTGGATACT   |        |        |        |        |        |        |        |              |        |
| SARS-CoV-2 NC_045512.2 | (29904)  | -----                                                                                              |        |        |        |        |        |        |        |              |        |
|                        |          |                                                                                                    |        |        |        |        |        |        |        | Section 1465 |        |
|                        | (140545) | 140545                                                                                             | 140558 | 140569 | 140580 | 140591 | 140602 | 140613 | 140624 | 140640       |        |
| T4 NC 000866.4         | (139811) | CTGCTCCTTGTTTAGTTCTCAAAGAAATCAAATCACGGGTTTCTTTAGTATGAGGAACATCTCTTGTCGGAGAAATTGTACCATACATCGGATTAA   |        |        |        |        |        |        |        |              |        |
| SARS-CoV-2 NC_045512.2 | (29904)  | -----                                                                                              |        |        |        |        |        |        |        |              |        |
|                        |          |                                                                                                    |        |        |        |        |        |        |        | Section 1466 |        |
|                        | (140641) | 140641                                                                                             | 140646 | 140657 | 140668 | 140679 | 140690 | 140701 | 140712 | 140723       | 140736 |
| T4 NC 000866.4         | (139907) | GCACGCCGACTTTAGCAGCAGCTATATTCTTTTTAGCTTCTTCAGTTTTAGGCTTTCTCATCTTTTTCTTAGGTTTCTTCGCTTTTAGCCCTTCCT   |        |        |        |        |        |        |        |              |        |
| SARS-CoV-2 NC_045512.2 | (29904)  | -----                                                                                              |        |        |        |        |        |        |        |              |        |
|                        |          |                                                                                                    |        |        |        |        |        |        |        | Section 1467 |        |
|                        | (140737) | 140737                                                                                             | 140745 | 140756 | 140767 | 140778 | 140789 | 140800 | 140811 | 140832       |        |
| T4 NC 000866.4         | (140003) | TTGGTTGCCGCCGATATTTTGTGTTTGGTTTCTTCTGTTAAACGCAGACCTGTTTTCGCTTTTTGACATTTTCAGTCTCGTTTCTTCAGAAATGAC   |        |        |        |        |        |        |        |              |        |
| SARS-CoV-2 NC_045512.2 | (29904)  | -----                                                                                              |        |        |        |        |        |        |        |              |        |
|                        |          |                                                                                                    |        |        |        |        |        |        |        | Section 1468 |        |
|                        | (140833) | 140833                                                                                             | 140844 | 140855 | 140866 | 140877 | 140888 | 140899 | 140910 | 140928       |        |
| T4 NC 000866.4         | (140099) | CGTACCTTTGCGAAATTGCGAATTTAACTTCTTTGCATGGGCATATATTTTAGAATGAACCTTTATAATGACGTTTCTTAGTTCCTTTTCATATTGCA |        |        |        |        |        |        |        |              |        |
| SARS-CoV-2 NC_045512.2 | (29904)  | -----                                                                                              |        |        |        |        |        |        |        |              |        |
|                        |          |                                                                                                    |        |        |        |        |        |        |        | Section 1469 |        |
|                        | (140929) | 140929                                                                                             | 140943 | 140954 | 140965 | 140976 | 140987 | 140998 | 141009 | 141024       |        |
| T4 NC 000866.4         | (140195) | CATCATGAAAAATGCGAATATAACAGATTTTACCGGATAAATCTTTGATAAAATAGCATGCGCTATAAAATGCTCTCTAGCTGTTAATTCAACTAA   |        |        |        |        |        |        |        |              |        |
| SARS-CoV-2 NC_045512.2 | (29904)  | -----                                                                                              |        |        |        |        |        |        |        |              |        |
|                        |          |                                                                                                    |        |        |        |        |        |        |        | Section 1470 |        |
|                        | (141025) | 141025                                                                                             | 141031 | 141042 | 141053 | 141064 | 141075 | 141086 | 141097 | 141108       | 141120 |
| T4 NC 000866.4         | (140291) | ATTTTCTTTATCATCAGAACCTCCCATGCATCTAGGGATTATATGATGTGTCTCTTTATATTTCGGATAAAGGTTCCCGAGCCTGAGCTCGGGAAAT  |        |        |        |        |        |        |        |              |        |
| SARS-CoV-2 NC_045512.2 | (29904)  | -----                                                                                              |        |        |        |        |        |        |        |              |        |

## SARS-CoV-2 &amp; T4.apr

|                        |          |                                                                                                   |        |        |        |        |        |        |        |
|------------------------|----------|---------------------------------------------------------------------------------------------------|--------|--------|--------|--------|--------|--------|--------|
|                        |          | Section 1471                                                                                      |        |        |        |        |        |        |        |
|                        | (141121) | 141121                                                                                            | 141130 | 141141 | 141152 | 141163 | 141174 | 141185 | 141196 |
| T4 NC 000866.4         | (140387) | TAGGTCGTTATAGATTTTTTGATAATTCATTACAATTTACACGCTGCACAATCATCGGCTTTAGGAGTTTCTATTTTCATAATCATCAGTACCAGAA |        |        |        |        |        |        |        |
| SARS-CoV-2 NC_045512.2 | (29904)  | -----                                                                                             |        |        |        |        |        |        |        |
|                        |          | Section 1472                                                                                      |        |        |        |        |        |        |        |
|                        | (141217) | 141217                                                                                            | 141229 | 141240 | 141251 | 141262 | 141273 | 141284 | 141295 |
| T4 NC 000866.4         | (140483) | CCATCACGGGTATTATGATAATAGAAATTTTTAATGCCATAATACCATCCGTATAGCATGTCATCAATCATTATTGACATTGGAACCTTTCCTTTT  |        |        |        |        |        |        |        |
| SARS-CoV-2 NC_045512.2 | (29904)  | -----                                                                                             |        |        |        |        |        |        |        |
|                        |          | Section 1473                                                                                      |        |        |        |        |        |        |        |
|                        | (141313) | 141313                                                                                            | 141328 | 141339 | 141350 | 141361 | 141372 | 141383 | 141394 |
| T4 NC 000866.4         | (140579) | GGAAAAATCTGCGGGTCATAATATGTATTCGCTGAAGCTGATTGACATACCCATTTTCAGCATAATAGCTACCTGCGTAAGATAAGGTTTATTACCT |        |        |        |        |        |        |        |
| SARS-CoV-2 NC_045512.2 | (29904)  | -----                                                                                             |        |        |        |        |        |        |        |
|                        |          | Section 1474                                                                                      |        |        |        |        |        |        |        |
|                        | (141409) | 141409                                                                                            | 141416 | 141427 | 141438 | 141449 | 141460 | 141471 | 141482 |
| T4 NC 000866.4         | (140675) | TTCTTAGCTAATTTCCATGTATAATCATAGAGGTCTATGTTATGCTCAATATTGGGCACGACTTGATTAAAGGAACCTCTTTTGATTCTTTAACA   |        |        |        |        |        |        |        |
| SARS-CoV-2 NC_045512.2 | (29904)  | -----                                                                                             |        |        |        |        |        |        |        |
|                        |          | Section 1475                                                                                      |        |        |        |        |        |        |        |
|                        | (141505) | 141505                                                                                            | 141515 | 141526 | 141537 | 141548 | 141559 | 141570 | 141581 |
| T4 NC 000866.4         | (140771) | CTTACCGGTCCACGTGGAGGCTCGTAGCCGTTTGTACTGTTAGAACTTGGAAGATGACTCACATGGCATAAGTGCTGATAATGTGCTATTACGG    |        |        |        |        |        |        |        |
| SARS-CoV-2 NC_045512.2 | (29904)  | -----                                                                                             |        |        |        |        |        |        |        |
|                        |          | Section 1476                                                                                      |        |        |        |        |        |        |        |
|                        | (141601) | 141601                                                                                            | 141614 | 141625 | 141636 | 141647 | 141658 | 141669 | 141680 |
| T4 NC 000866.4         | (140867) | ATGCCAAATAGCTTAAGGTCTTCCCGCAGCGCCGACCAGTCACAAACGTATTTTGGAGCTGCGATTTGGTCAATCTTTTTATTGTACCAGTCGATA  |        |        |        |        |        |        |        |
| SARS-CoV-2 NC_045512.2 | (29904)  | -----                                                                                             |        |        |        |        |        |        |        |
|                        |          | Section 1477                                                                                      |        |        |        |        |        |        |        |
|                        | (141697) | 141697                                                                                            | 141702 | 141713 | 141724 | 141735 | 141746 | 141757 | 141768 |
| T4 NC 000866.4         | (140963) | GGTAATTCGCCCTCGAGACCAACGAGTGTCTGAATAATATCCGAAGGTCCTTTTTCTTTGGCGAGCTTAATGGATGCTTTAATGAGTCCATACTGT  |        |        |        |        |        |        |        |
| SARS-CoV-2 NC_045512.2 | (29904)  | -----                                                                                             |        |        |        |        |        |        |        |

## SARS-CoV-2 &amp; T4.apr

|                        |          |                                                                                                     |        |        |        |        |        |        |        |               |
|------------------------|----------|-----------------------------------------------------------------------------------------------------|--------|--------|--------|--------|--------|--------|--------|---------------|
|                        |          |                                                                                                     |        |        |        |        |        |        |        | Section 1478  |
|                        | (141793) | 141793                                                                                              | 141801 | 141812 | 141823 | 141834 | 141845 | 141856 | 141867 | 141888        |
| T4 NC 000866.4         | (141059) | AATCTCTCAAATAGTTCATGTGTTAAATCGTTAGCATCTTCATAAGAAGCAAAGTTACTTGCCAGCCAAGCTGCATAGTTGGTAACACCTACACCG    |        |        |        |        |        |        |        |               |
| SARS-CoV-2 NC_045512.2 | (29904)  | -----                                                                                               |        |        |        |        |        |        |        |               |
|                        |          |                                                                                                     |        |        |        |        |        |        |        | Section 1479  |
|                        | (141889) | 141889                                                                                              | 141900 | 141911 | 141922 | 141933 | 141944 | 141955 | 141966 | 141984        |
| T4 NC 000866.4         | (141155) | AGGTTACGACGCTTTTTAGCTTTTTCTGCTTCAGGAACCGGATATCCTTGGTAATCCAACAGATTATCAAGAGCACGAACCTTGAACCTTCTGCCAAT  |        |        |        |        |        |        |        |               |
| SARS-CoV-2 NC_045512.2 | (29904)  | -----                                                                                               |        |        |        |        |        |        |        |               |
|                        |          |                                                                                                     |        |        |        |        |        |        |        | Section 1480  |
|                        | (141985) | 141985                                                                                              | 141999 | 142010 | 142021 | 142032 | 142043 | 142054 | 142065 | 142080        |
| T4 NC 000866.4         | (141251) | TCATTAATTTTATCTTGGTCTTGCCAGTCAAAATTATCTAATACGAATGCAGAGAGAGTACACAATCCAATTTTCAGCATCAGGGCTATTACATCA    |        |        |        |        |        |        |        |               |
| SARS-CoV-2 NC_045512.2 | (29904)  | -----                                                                                               |        |        |        |        |        |        |        |               |
|                        |          |                                                                                                     |        |        |        |        |        |        |        | Section 1481  |
|                        | (142081) | 142081                                                                                              | 142087 | 142098 | 142109 | 142120 | 142131 | 142142 | 142153 | 142164 142176 |
| T4 NC 000866.4         | (141347) | TTTGTTGGAATAGCAATTTTCACAGCACAAGTTACTCTGACGAATAGGTGCCTTTTCACGAATAAACGGAGTATAGTTATTCTGATTATCAATGAAC   |        |        |        |        |        |        |        |               |
| SARS-CoV-2 NC_045512.2 | (29904)  | -----                                                                                               |        |        |        |        |        |        |        |               |
|                        |          |                                                                                                     |        |        |        |        |        |        |        | Section 1482  |
|                        | (142177) | 142177                                                                                              | 142186 | 142197 | 142208 | 142219 | 142230 | 142241 | 142252 | 142272        |
| T4 NC 000866.4         | (141443) | TGCACATAAATCCTTGCTGTTTCTGAAACGTTTCAGTCATGAGCAATTCAAATAGTTTCACGGGCTTTAATACGCTTTTTACGAATATTAGGGTCTTTT |        |        |        |        |        |        |        |               |
| SARS-CoV-2 NC_045512.2 | (29904)  | -----                                                                                               |        |        |        |        |        |        |        |               |
|                        |          |                                                                                                     |        |        |        |        |        |        |        | Section 1483  |
|                        | (142273) | 142273                                                                                              | 142285 | 142296 | 142307 | 142318 | 142329 | 142340 | 142351 | 142368        |
| T4 NC 000866.4         | (141539) | TCTGCTGCTTCGTATAATTCACGGAAACGGTCTTGGTCTTTAAAATAAGAATAATAAAGCTCGCCACCCATTTTCATGCGGACTGAACAAAGTAATG   |        |        |        |        |        |        |        |               |
| SARS-CoV-2 NC_045512.2 | (29904)  | -----                                                                                               |        |        |        |        |        |        |        |               |
|                        |          |                                                                                                     |        |        |        |        |        |        |        | Section 1484  |
|                        | (142369) | 142369                                                                                              | 142384 | 142395 | 142406 | 142417 | 142428 | 142439 | 142450 | 142464        |
| T4 NC 000866.4         | (141635) | TAATCGTTTTTTTCCAAAACGTTCCATCATCAAATCATTCAGTTGAACACCATAATCCATATGACGAATGCGGTTTTCTTCTACGCCTTTGTTATTT   |        |        |        |        |        |        |        |               |
| SARS-CoV-2 NC_045512.2 | (29904)  | -----                                                                                               |        |        |        |        |        |        |        |               |

## SARS-CoV-2 &amp; T4.apr

|                        |          |                                                                                                    |        |        |        |        |        |        |        |               |
|------------------------|----------|----------------------------------------------------------------------------------------------------|--------|--------|--------|--------|--------|--------|--------|---------------|
|                        |          |                                                                                                    |        |        |        |        |        |        |        | Section 1485  |
|                        | (142465) | 142465                                                                                             | 142472 | 142483 | 142494 | 142505 | 142516 | 142527 | 142538 | 142549 142560 |
| T4 NC 000866.4         | (141731) | TTCAAAACGAGAAGATTTTCAACTTCCAAATGCCAAATAGGATAATAAGCAGTAGCAGCGCCGCCACGAATTCCACCCTGTGAACATGATTTAACT   |        |        |        |        |        |        |        |               |
| SARS-CoV-2 NC_045512.2 | (29904)  | -----                                                                                              |        |        |        |        |        |        |        |               |
|                        |          |                                                                                                    |        |        |        |        |        |        |        | Section 1486  |
|                        | (142561) | 142561                                                                                             | 142571 | 142582 | 142593 | 142604 | 142615 | 142626 | 142637 | 142656        |
| T4 NC 000866.4         | (141877) | GCAGTCTGAAAAATGTTTCCAAAAAGGAATAACACCAGTATGGCGTACTTCACCCATGCCAATCTTAGAACCTTCGGCAGCAATCATACCAACGTTA  |        |        |        |        |        |        |        |               |
| SARS-CoV-2 NC_045512.2 | (29904)  | -----                                                                                              |        |        |        |        |        |        |        |               |
|                        |          |                                                                                                    |        |        |        |        |        |        |        | Section 1487  |
|                        | (142657) | 142657                                                                                             | 142670 | 142681 | 142692 | 142703 | 142714 | 142725 | 142736 | 142752        |
| T4 NC 000866.4         | (141923) | ATACCAATTCCAGCGCGTTTAGAGATATATTCAACAATTGAAGCAGAAGCCTTATTGATAGACTTCAATGAATCTCCTGCCTCAATAACAACACAT   |        |        |        |        |        |        |        |               |
| SARS-CoV-2 NC_045512.2 | (29904)  | -----                                                                                              |        |        |        |        |        |        |        |               |
|                        |          |                                                                                                    |        |        |        |        |        |        |        | Section 1488  |
|                        | (142753) | 142753                                                                                             | 142758 | 142769 | 142780 | 142791 | 142802 | 142813 | 142824 | 142835 142848 |
| T4 NC 000866.4         | (142019) | GAACTAAACTGTCGAGTCGGAGTACGACAACCAGCCATAATAGGAGTTGGCAATGAAATCTGTCTGAGTTGATACTGCTTCATAAAAACGGATAACA  |        |        |        |        |        |        |        |               |
| SARS-CoV-2 NC_045512.2 | (29904)  | -----                                                                                              |        |        |        |        |        |        |        |               |
|                        |          |                                                                                                    |        |        |        |        |        |        |        | Section 1489  |
|                        | (142849) | 142849                                                                                             | 142857 | 142868 | 142879 | 142890 | 142901 | 142912 | 142923 | 142944        |
| T4 NC 000866.4         | (142115) | TGTTTTAATCTATCAACAGGTTTCATCTTGATGCAGTGCCATTCCAATAGTCATAAATGCAAACGTGTGGAGTTTCATAAATTTGACCAGTGGTTTTA |        |        |        |        |        |        |        |               |
| SARS-CoV-2 NC_045512.2 | (29904)  | -----                                                                                              |        |        |        |        |        |        |        |               |
|                        |          |                                                                                                    |        |        |        |        |        |        |        | Section 1490  |
|                        | (142945) | 142945                                                                                             | 142956 | 142967 | 142978 | 142989 | 143000 | 143011 | 143022 | 143040        |
| T4 NC 000866.4         | (142211) | TCTTTAACTAGATATTTTTCTTTTAATTGCATTGCCCGGAATAAGTAAATTCCATATCCCGTTCTGTGCTTAATTTTTGATTCTAAAAATGTAATT   |        |        |        |        |        |        |        |               |
| SARS-CoV-2 NC_045512.2 | (29904)  | -----                                                                                              |        |        |        |        |        |        |        |               |
|                        |          |                                                                                                    |        |        |        |        |        |        |        | Section 1491  |
|                        | (143041) | 143041                                                                                             | 143055 | 143066 | 143077 | 143088 | 143099 | 143110 | 143121 | 143136        |
| T4 NC 000866.4         | (142307) | TCTTCTGCTGAATATTTTGACAATAATTCAGGGTCGTATTTACCTGCATTTACACAATAAGAAATATGGTCAATAAATGAACGTGGTTCATACTGC   |        |        |        |        |        |        |        |               |
| SARS-CoV-2 NC_045512.2 | (29904)  | -----                                                                                              |        |        |        |        |        |        |        |               |

## SARS-CoV-2 &amp; T4.apr

|                                |                                                                                                   |        |        |        |        |        |        |        |               |
|--------------------------------|---------------------------------------------------------------------------------------------------|--------|--------|--------|--------|--------|--------|--------|---------------|
| Section 1492                   |                                                                                                   |        |        |        |        |        |        |        |               |
| (143137)                       | 143137                                                                                            | 143143 | 143154 | 143165 | 143176 | 143187 | 143198 | 143209 | 143220 143232 |
| T4 NC 000866.4 (142403)        | CCATAAACATGCTTACGAAGAGCAAACATTAAACAGCGTGCAGCTACATATTGATAATCAGGTTCTTCAACCGAAATAGAATTTCGCAGCAGCCTTA |        |        |        |        |        |        |        |               |
| SARS-CoV-2 NC_045512.2 (29904) | -----                                                                                             |        |        |        |        |        |        |        |               |
| Section 1493                   |                                                                                                   |        |        |        |        |        |        |        |               |
| (143233)                       | 143233                                                                                            | 143242 | 143253 | 143264 | 143275 | 143286 | 143297 | 143308 | 143328        |
| T4 NC 000866.4 (142499)        | ATGACAATAGTCTGAATATCATCAGTTGTCATTCCATCACGGAGATAAGATTTAATATTTTCATATAATTCATAAGGATCTACTGATGTTCCCTTCA |        |        |        |        |        |        |        |               |
| SARS-CoV-2 NC_045512.2 (29904) | -----                                                                                             |        |        |        |        |        |        |        |               |
| Section 1494                   |                                                                                                   |        |        |        |        |        |        |        |               |
| (143329)                       | 143329                                                                                            | 143341 | 143352 | 143363 | 143374 | 143385 | 143396 | 143407 | 143424        |
| T4 NC 000866.4 (142595)        | GCTGCCCAAGATAAAACTTTAATAATTTTTGTGGGTCAAAGCTCTGAGAAACACCACTACTTTTGATAACATTAATTAATTGCATAAGTCCTCAA   |        |        |        |        |        |        |        |               |
| SARS-CoV-2 NC_045512.2 (29904) | -----                                                                                             |        |        |        |        |        |        |        |               |
| Section 1495                   |                                                                                                   |        |        |        |        |        |        |        |               |
| (143425)                       | 143425                                                                                            | 143440 | 143451 | 143462 | 143473 | 143484 | 143495 | 143506 | 143520        |
| T4 NC 000866.4 (142691)        | CTTGAAAATCGTCTTTAAACAATCGGTTAACTATATGAGCTATTATATCACCATGACACGGCTTTGGTTTACATGTGCATCCTAGCCTCATTCCAC  |        |        |        |        |        |        |        |               |
| SARS-CoV-2 NC_045512.2 (29904) | -----                                                                                             |        |        |        |        |        |        |        |               |
| Section 1496                   |                                                                                                   |        |        |        |        |        |        |        |               |
| (143521)                       | 143521                                                                                            | 143528 | 143539 | 143550 | 143561 | 143572 | 143583 | 143594 | 143605 143616 |
| T4 NC 000866.4 (142787)        | GTAAAGGCTCTAAATGTGCTTTAGTTATTTCTCCGGATTTAATTCGACGTATAAAATCTTTTTTGAATAATTCAATGGCAGCCTCCCGGCTGCCAG  |        |        |        |        |        |        |        |               |
| SARS-CoV-2 NC_045512.2 (29904) | -----                                                                                             |        |        |        |        |        |        |        |               |
| Section 1497                   |                                                                                                   |        |        |        |        |        |        |        |               |
| (143617)                       | 143617                                                                                            | 143627 | 143638 | 143649 | 143660 | 143671 | 143682 | 143693 | 143712        |
| T4 NC 000866.4 (142883)        | CATCTTTACCGACGTAATTTCCCCAAATGTACCGCGGTGAATATTAACATCAAAGTCGGATTTATATTTATTTACTACCCGGCATAGACGGCCCA   |        |        |        |        |        |        |        |               |
| SARS-CoV-2 NC_045512.2 (29904) | -----                                                                                             |        |        |        |        |        |        |        |               |
| Section 1498                   |                                                                                                   |        |        |        |        |        |        |        |               |
| (143713)                       | 143713                                                                                            | 143726 | 143737 | 143748 | 143759 | 143770 | 143781 | 143792 | 143808        |
| T4 NC 000866.4 (142979)        | CGCTGGAATAATTCGTCATATTGTTTTTCCGTTAAACAGTAATATCGTAGTAACAGTCAGAAGAAGTTTTAACTGTGGAAATTTTATTATCAAAA   |        |        |        |        |        |        |        |               |
| SARS-CoV-2 NC_045512.2 (29904) | -----                                                                                             |        |        |        |        |        |        |        |               |

## SARS-CoV-2 &amp; T4.apr

|                                |                                                                                                   |        |        |        |        |        |        |        |        |        |
|--------------------------------|---------------------------------------------------------------------------------------------------|--------|--------|--------|--------|--------|--------|--------|--------|--------|
| Section 1499                   |                                                                                                   |        |        |        |        |        |        |        |        |        |
| (143809)                       | 143809                                                                                            | 143814 | 143825 | 143836 | 143847 | 143858 | 143869 | 143880 | 143891 | 143904 |
| T4 NC 000866.4 (143075)        | TACTCACGAGTCATTTTATGAGTATAGTATTTTTTACCATAAAATGGTAATAGGCTGTTCTGGTCCTGGAACCTCTAACTCGCTTGGGTTAGGAAGT |        |        |        |        |        |        |        |        |        |
| SARS-CoV-2 NC_045512.2 (29904) | -----                                                                                             |        |        |        |        |        |        |        |        |        |
| Section 1500                   |                                                                                                   |        |        |        |        |        |        |        |        |        |
| (143905)                       | 143905                                                                                            | 143913 | 143924 | 143935 | 143946 | 143957 | 143968 | 143979 |        | 144000 |
| T4 NC 000866.4 (143171)        | GTAAAAAGAACTACACCAGAAGTATCTTTAAATCGTAAATCATATATCCTCGCAATAATAAAATTACACCGCCATCTTTCCTTTAATAGGAGGGT   |        |        |        |        |        |        |        |        |        |
| SARS-CoV-2 NC_045512.2 (29904) | -----                                                                                             |        |        |        |        |        |        |        |        |        |
| Section 1501                   |                                                                                                   |        |        |        |        |        |        |        |        |        |
| (144001)                       | 144001                                                                                            | 144012 | 144023 | 144034 | 144045 | 144056 | 144067 | 144078 |        | 144096 |
| T4 NC 000866.4 (143267)        | GTGATACATAGTTGTTAAGAACGAAATCTTTAGGCCTAAGTTTAAAGAACATATTTTAATTGTTCTTTAGTAGAAAGATATCGGAATTTATAAGGTA |        |        |        |        |        |        |        |        |        |
| SARS-CoV-2 NC_045512.2 (29904) | -----                                                                                             |        |        |        |        |        |        |        |        |        |
| Section 1502                   |                                                                                                   |        |        |        |        |        |        |        |        |        |
| (144097)                       | 144097                                                                                            | 144111 | 144122 | 144133 | 144144 | 144155 | 144166 | 144177 |        | 144192 |
| T4 NC 000866.4 (143363)        | GACCACCTTATTACCAGCTCACAAAGCTCTTTAGGTTACAGCCTCAAATTTCTTTACATTGTTCTACGTGATTTCATATAGATATGAGTATTACCAC |        |        |        |        |        |        |        |        |        |
| SARS-CoV-2 NC_045512.2 (29904) | -----                                                                                             |        |        |        |        |        |        |        |        |        |
| Section 1503                   |                                                                                                   |        |        |        |        |        |        |        |        |        |
| (144193)                       | 144193                                                                                            | 144199 | 144210 | 144221 | 144232 | 144243 | 144254 | 144265 | 144276 | 144288 |
| T4 NC 000866.4 (143459)        | CAGAAAATATCAAATCCCCTGGAATAAGATTACACATCTTAGCTACAATATGAACTAACGTAGCATATGACGCAATATTAAACGGTAGCATTATGT  |        |        |        |        |        |        |        |        |        |
| SARS-CoV-2 NC_045512.2 (29904) | -----                                                                                             |        |        |        |        |        |        |        |        |        |
| Section 1504                   |                                                                                                   |        |        |        |        |        |        |        |        |        |
| (144289)                       | 144289                                                                                            | 144298 | 144309 | 144320 | 144331 | 144342 | 144353 | 144364 |        | 144384 |
| T4 NC 000866.4 (143555)        | TCAGATAAGGTCGTTAATCTTACCCCGGAATTATATCCAGCTGCATGTCACCATGCAGAGCAGACTATATCTCCAACCTTGTTAAAGCAAGTTGTCT |        |        |        |        |        |        |        |        |        |
| SARS-CoV-2 NC_045512.2 (29904) | -----                                                                                             |        |        |        |        |        |        |        |        |        |
| Section 1505                   |                                                                                                   |        |        |        |        |        |        |        |        |        |
| (144385)                       | 144385                                                                                            | 144397 | 144408 | 144419 | 144430 | 144441 | 144452 | 144463 |        | 144480 |
| T4 NC 000866.4 (143651)        | ATCGTTTTCGAGTCACTTGACCCTACTCCCCAAAGGGATAGTCGTTAGGCATTTATGTAGAACCAATTCCATTTATCAGATTTTACACGATAAGTAA |        |        |        |        |        |        |        |        |        |
| SARS-CoV-2 NC_045512.2 (29904) | -----                                                                                             |        |        |        |        |        |        |        |        |        |

## SARS-CoV-2 &amp; T4.apr

|                        |          |                                                                                                   |        |        |        |        |        |        |        |               |
|------------------------|----------|---------------------------------------------------------------------------------------------------|--------|--------|--------|--------|--------|--------|--------|---------------|
|                        |          |                                                                                                   |        |        |        |        |        |        |        | Section 1506  |
|                        | (144481) | 144481                                                                                            | 144496 | 144507 | 144518 | 144529 | 144540 | 144551 | 144562 | 144576        |
| T4 NC 000866.4         | (143747) | CTAATCCAGACGAAATTTTAAAAATGTCTAGCTGCATCTGCTGCACAATCAAAAATAACCCCATCACATGAAATCTTTTAAATATTACTAGGCTTTT |        |        |        |        |        |        |        |               |
| SARS-CoV-2 NC_045512.2 | (29904)  | -----                                                                                             |        |        |        |        |        |        |        |               |
|                        |          |                                                                                                   |        |        |        |        |        |        |        | Section 1507  |
|                        | (144577) | 144577                                                                                            | 144584 | 144595 | 144606 | 144617 | 144628 | 144639 | 144650 | 144661 144672 |
| T4 NC 000866.4         | (143843) | TACCTTTCATCTTTTCTGATATTTTAGATTTAGTTATGTCTGAATGCTTATGATTAAAGAATGAATTATTTTCACCTGAACGATTTCTGCATTTAC  |        |        |        |        |        |        |        |               |
| SARS-CoV-2 NC_045512.2 | (29904)  | -----                                                                                             |        |        |        |        |        |        |        |               |
|                        |          |                                                                                                   |        |        |        |        |        |        |        | Section 1508  |
|                        | (144673) | 144673                                                                                            | 144683 | 144694 | 144705 | 144716 | 144727 | 144738 | 144749 | 144768        |
| T4 NC 000866.4         | (143939) | TACAAGTATAAGCAGAAGTTTGTATGCGAACACCGCACTTACAAAACCTTATGGGTTTCTGGATTCCAACGCCCGTTTTTACTTCCGGGTTTACTGT |        |        |        |        |        |        |        |               |
| SARS-CoV-2 NC_045512.2 | (29904)  | -----                                                                                             |        |        |        |        |        |        |        |               |
|                        |          |                                                                                                   |        |        |        |        |        |        |        | Section 1509  |
|                        | (144769) | 144769                                                                                            | 144782 | 144793 | 144804 | 144815 | 144826 | 144837 | 144848 | 144864        |
| T4 NC 000866.4         | (144035) | AAAGAGCTTTCGACCATCAGGTCCAAGTTTAAGCATCTTAGCTTTAACAGTTTCAGAACGTTTCTTAATAATTTCTTCTTTTAAATGGATGCGTAG  |        |        |        |        |        |        |        |               |
| SARS-CoV-2 NC_045512.2 | (29904)  | -----                                                                                             |        |        |        |        |        |        |        |               |
|                        |          |                                                                                                   |        |        |        |        |        |        |        | Section 1510  |
|                        | (144865) | 144865                                                                                            | 144870 | 144881 | 144892 | 144903 | 144914 | 144925 | 144936 | 144947 144960 |
| T4 NC 000866.4         | (144131) | AACATGTATCACCAAACGTTGCATCAGCAATATTGTATCCATTAATTTTAGAATTAAGCTCTTTAATCCAAAATTTTCTCGTTCAATAATCAAAT   |        |        |        |        |        |        |        |               |
| SARS-CoV-2 NC_045512.2 | (29904)  | -----                                                                                             |        |        |        |        |        |        |        |               |
|                        |          |                                                                                                   |        |        |        |        |        |        |        | Section 1511  |
|                        | (144961) | 144961                                                                                            | 144969 | 144980 | 144991 | 145002 | 145013 | 145024 | 145035 | 145056        |
| T4 NC 000866.4         | (144227) | CTTCTCATATGGAATTTCTTCCAAAATAGAACATTCAAACACATTACCATGTTTGTTAAAGACCTCTGAAGTTTTATAGAAGAATGGCATCCTT    |        |        |        |        |        |        |        |               |
| SARS-CoV-2 NC_045512.2 | (29904)  | -----                                                                                             |        |        |        |        |        |        |        |               |
|                        |          |                                                                                                   |        |        |        |        |        |        |        | Section 1512  |
|                        | (145057) | 145057                                                                                            | 145068 | 145079 | 145090 | 145101 | 145112 | 145123 | 145134 | 145152        |
| T4 NC 000866.4         | (144323) | TTTCTAAATCTTTAAAAATGCCTCTTCCATCTCTTTTCAAATCTTTAGCACTTCTACATATACTTTATTGTTTAAAGTATTTTTAATCTGATAAA   |        |        |        |        |        |        |        |               |
| SARS-CoV-2 NC_045512.2 | (29904)  | -----                                                                                             |        |        |        |        |        |        |        |               |



## SARS-CoV-2 &amp; T4.apr

|                                |                                                                                                   |        |        |        |        |        |        |        |               |
|--------------------------------|---------------------------------------------------------------------------------------------------|--------|--------|--------|--------|--------|--------|--------|---------------|
| Section 1513                   |                                                                                                   |        |        |        |        |        |        |        |               |
| (145153)                       | 145153                                                                                            | 145167 | 145178 | 145189 | 145200 | 145211 | 145222 | 145233 | 145248        |
| T4 NC 000866.4 (144419)        | TTCCGCTTTTCATAAATACCTCTTTAAATATAGAAGTATTTATTAAAGGGCAAGTCCTACAATTTAGCACGGGATTGTCTACTAGAGAGGTTCCCC  |        |        |        |        |        |        |        |               |
| SARS-CoV-2 NC_045512.2 (29904) | -----                                                                                             |        |        |        |        |        |        |        |               |
| Section 1514                   |                                                                                                   |        |        |        |        |        |        |        |               |
| (145249)                       | 145249                                                                                            | 145255 | 145266 | 145277 | 145288 | 145299 | 145310 | 145321 | 145332 145344 |
| T4 NC 000866.4 (144515)        | GTTTAGATAGATTACAAGTATAAGTCACCTTATACTCAGGCCTCAATTAACCCAAGAAAACATCTACTGAGCGTTGATACCACTGCAAATCCAAAT  |        |        |        |        |        |        |        |               |
| SARS-CoV-2 NC_045512.2 (29904) | -----                                                                                             |        |        |        |        |        |        |        |               |
| Section 1515                   |                                                                                                   |        |        |        |        |        |        |        |               |
| (145345)                       | 145345                                                                                            | 145354 | 145365 | 145376 | 145387 | 145398 | 145409 | 145420 | 145440        |
| T4 NC 000866.4 (144611)        | AGCCATTACGCACATTAAACTGATAGAACATATGACAAGGCGGTAATGCCATATATTTAAGTTTCAGCTGGATTCCATGCAGAAACAATTTGACGCC |        |        |        |        |        |        |        |               |
| SARS-CoV-2 NC_045512.2 (29904) | -----                                                                                             |        |        |        |        |        |        |        |               |
| Section 1516                   |                                                                                                   |        |        |        |        |        |        |        |               |
| (145441)                       | 145441                                                                                            | 145453 | 145464 | 145475 | 145486 | 145497 | 145508 | 145519 | 145536        |
| T4 NC 000866.4 (144707)        | TATCATTTGGCAGTTTTTTAATACGATCAATAACTTCTATAATTTGGTCTACACCACCAAAATCAGGCCACTGTTTTCCATAAATTGGACCAAGTT  |        |        |        |        |        |        |        |               |
| SARS-CoV-2 NC_045512.2 (29904) | -----                                                                                             |        |        |        |        |        |        |        |               |
| Section 1517                   |                                                                                                   |        |        |        |        |        |        |        |               |
| (145537)                       | 145537                                                                                            | 145552 | 145563 | 145574 | 145585 | 145596 | 145607 | 145618 | 145632        |
| T4 NC 000866.4 (144803)        | CACCGCTATGGTATCCTAAATCTTTTGCTTGATTTTCGTAATTTTCATCCCAGACTGTTTTGCCTTGGATTAACGAATCGTGTGTAATTAATCGTA  |        |        |        |        |        |        |        |               |
| SARS-CoV-2 NC_045512.2 (29904) | -----                                                                                             |        |        |        |        |        |        |        |               |
| Section 1518                   |                                                                                                   |        |        |        |        |        |        |        |               |
| (145633)                       | 145633                                                                                            | 145640 | 145651 | 145662 | 145673 | 145684 | 145695 | 145706 | 145717 145728 |
| T4 NC 000866.4 (144899)        | AATCATTTGACATTTGTGCTTCCTGATAAAAACCATATTAGCTCAGCAATGCAAGCTTTCCAGGCGAGCTTCTTAGTTGTTACCGCAGGAAAACCTT |        |        |        |        |        |        |        |               |
| SARS-CoV-2 NC_045512.2 (29904) | -----                                                                                             |        |        |        |        |        |        |        |               |
| Section 1519                   |                                                                                                   |        |        |        |        |        |        |        |               |
| (145729)                       | 145729                                                                                            | 145739 | 145750 | 145761 | 145772 | 145783 | 145794 | 145805 | 145824        |
| T4 NC 000866.4 (144995)        | TAGTTAAATCCCAGCGTAATTTAGATCCGAACAGAGCAATTGTTCTGTGCCTGTACGATCATCGGTTTCATAACCATTTTCAAAAATGTCTTTAA   |        |        |        |        |        |        |        |               |
| SARS-CoV-2 NC_045512.2 (29904) | -----                                                                                             |        |        |        |        |        |        |        |               |

## SARS-CoV-2 &amp; T4.apr

|                        |          |                                                                                                     |        |        |        |        |        |        |        |              |        |
|------------------------|----------|-----------------------------------------------------------------------------------------------------|--------|--------|--------|--------|--------|--------|--------|--------------|--------|
|                        |          |                                                                                                     |        |        |        |        |        |        |        | Section 1520 |        |
|                        | (145825) | 145825                                                                                              | 145838 | 145849 | 145860 | 145871 | 145882 | 145893 | 145904 | 145920       |        |
| T4 NC_000866.4         | (145091) | TTAAATCTTGGTATTGTTTCATTTATATACTGATTCCGTAAGGGTTGTTACTTCATCTATTTTATACCAATGCGTTTCAACCATTTACGCTTGCT     |        |        |        |        |        |        |        |              |        |
| SARS-CoV-2 NC_045512.2 | (29904)  | -----                                                                                               |        |        |        |        |        |        |        |              |        |
|                        |          |                                                                                                     |        |        |        |        |        |        |        | Section 1521 |        |
|                        | (145921) | 145921                                                                                              | 145926 | 145937 | 145948 | 145959 | 145970 | 145981 | 145992 | 146003       | 146016 |
| T4 NC_000866.4         | (145187) | TATATCATCAAGAAAACCTTGCCTCTAATTGAACTGTTGAATTAACACGATGCCTTTTAACGATGCGAGAAACAACACTACTTCATCTGCATAAGGTAA |        |        |        |        |        |        |        |              |        |
| SARS-CoV-2 NC_045512.2 | (29904)  | -----                                                                                               |        |        |        |        |        |        |        |              |        |
|                        |          |                                                                                                     |        |        |        |        |        |        |        | Section 1522 |        |
|                        | (146017) | 146017                                                                                              | 146025 | 146036 | 146047 | 146058 | 146069 | 146080 | 146091 | 146112       |        |
| T4 NC_000866.4         | (145283) | TGCAGCATATAACAGAGCAGGCCCGCCAATTACACTTACTTTAGAATTCTGATCAAGCATAGTTTCGAATGGTGCATTAGGGCTTGACACTTGAAT    |        |        |        |        |        |        |        |              |        |
| SARS-CoV-2 NC_045512.2 | (29904)  | -----                                                                                               |        |        |        |        |        |        |        |              |        |
|                        |          |                                                                                                     |        |        |        |        |        |        |        | Section 1523 |        |
|                        | (146113) | 146113                                                                                              | 146124 | 146135 | 146146 | 146157 | 146168 | 146179 | 146190 | 146208       |        |
| T4 NC_000866.4         | (145379) | TTCGCCGCCAGAAATGTAAGTTATATATTGCTCCCAAGTAATATAGAAATGTGCTAAATCGCCGTCTTTAGTTACAGGATAATCACGCGCAAGGTC    |        |        |        |        |        |        |        |              |        |
| SARS-CoV-2 NC_045512.2 | (29904)  | -----                                                                                               |        |        |        |        |        |        |        |              |        |
|                        |          |                                                                                                     |        |        |        |        |        |        |        | Section 1524 |        |
|                        | (146209) | 146209                                                                                              | 146223 | 146234 | 146245 | 146256 | 146267 | 146278 | 146289 | 146304       |        |
| T4 NC_000866.4         | (145475) | ACACACCACAATATGGCTACGACCAGGAAGTAATGTAGGCAATGACTGGAACGTTTTAGCACCCATAATCATAATTGTGCCTTCAGTACGAGCTTT    |        |        |        |        |        |        |        |              |        |
| SARS-CoV-2 NC_045512.2 | (29904)  | -----                                                                                               |        |        |        |        |        |        |        |              |        |
|                        |          |                                                                                                     |        |        |        |        |        |        |        | Section 1525 |        |
|                        | (146305) | 146305                                                                                              | 146311 | 146322 | 146333 | 146344 | 146355 | 146366 | 146377 | 146388       | 146400 |
| T4 NC_000866.4         | (145571) | AAAATTCTGGAGGTCCTTTTTAACTCGTCCCATGGTAAACCATCACCTAAACCGAATGCTAATTCATTAAAGCCGTCGACCGTTTTAGTTGGAGA     |        |        |        |        |        |        |        |              |        |
| SARS-CoV-2 NC_045512.2 | (29904)  | -----                                                                                               |        |        |        |        |        |        |        |              |        |
|                        |          |                                                                                                     |        |        |        |        |        |        |        | Section 1526 |        |
|                        | (146401) | 146401                                                                                              | 146410 | 146421 | 146432 | 146443 | 146454 | 146465 | 146476 | 146496       |        |
| T4 NC_000866.4         | (145667) | ATAACGGAATACCAATTTAATCATTACGTAAATCCTATTTTAATTGAAAACGAATGCTTACTTGATAATTTCAATGACATACATAATATTTTCCT     |        |        |        |        |        |        |        |              |        |
| SARS-CoV-2 NC_045512.2 | (29904)  | -----                                                                                               |        |        |        |        |        |        |        |              |        |

## SARS-CoV-2 &amp; T4.apr

|                        |          |                                                                                                    |        |        |        |        |        |        |        |               |
|------------------------|----------|----------------------------------------------------------------------------------------------------|--------|--------|--------|--------|--------|--------|--------|---------------|
|                        |          |                                                                                                    |        |        |        |        |        |        |        | Section 1527  |
|                        | (146497) | 146497                                                                                             | 146509 | 146520 | 146531 | 146542 | 146553 | 146564 | 146575 | 146592        |
| T4 NC_000866.4         | (145763) | CAAACAGACTTTTTCACAATTTTCCAATCAGCTTTAAACTGCTCGACGTCAGAATGGTAAATCCAAAATCCTGCGCTTTCTCCGTCTTCATAAAGA   |        |        |        |        |        |        |        |               |
| SARS-CoV-2 NC_045512.2 | (29904)  | -----                                                                                              |        |        |        |        |        |        |        |               |
|                        |          |                                                                                                    |        |        |        |        |        |        |        | Section 1528  |
|                        | (146593) | 146593                                                                                             | 146608 | 146619 | 146630 | 146641 | 146652 | 146663 | 146674 | 146688        |
| T4 NC_000866.4         | (145859) | GGACATCCATCGCATTTCATCTTCCCATCCCATATCACGTAAAAGATGTTTCAGCTTTTTCAACAAGTTCAGAATCTTTACCGATGATATTAAAATAC |        |        |        |        |        |        |        |               |
| SARS-CoV-2 NC_045512.2 | (29904)  | -----                                                                                              |        |        |        |        |        |        |        |               |
|                        |          |                                                                                                    |        |        |        |        |        |        |        | Section 1529  |
|                        | (146689) | 146689                                                                                             | 146696 | 146707 | 146718 | 146729 | 146740 | 146751 | 146762 | 146773 146784 |
| T4 NC_000866.4         | (145955) | CATTTACCTCTAACTTCTGAATCTTTGATGCTCTGGCGTTGTAATCTCATTTTATTCTCCTTAGCAAGCTTTAATCAAAAGATATAAACAGACCAA   |        |        |        |        |        |        |        |               |
| SARS-CoV-2 NC_045512.2 | (29904)  | -----                                                                                              |        |        |        |        |        |        |        |               |
|                        |          |                                                                                                    |        |        |        |        |        |        |        | Section 1530  |
|                        | (146785) | 146785                                                                                             | 146795 | 146806 | 146817 | 146828 | 146839 | 146850 | 146861 | 146880        |
| T4 NC_000866.4         | (146051) | CATAACTGCTGCCATAATATAAGGTGCGAACATTTTCTTTTCTCCATTAGTTTTGATAGGGTAATAGTATCACACTACTACCCTGATGTAAACTAC   |        |        |        |        |        |        |        |               |
| SARS-CoV-2 NC_045512.2 | (29904)  | -----                                                                                              |        |        |        |        |        |        |        |               |
|                        |          |                                                                                                    |        |        |        |        |        |        |        | Section 1531  |
|                        | (146881) | 146881                                                                                             | 146894 | 146905 | 146916 | 146927 | 146938 | 146949 | 146960 | 146976        |
| T4 NC_000866.4         | (146147) | TTTTTGAAAGTTTTTCGCAAAAGTTCAATGATTTTCATCTACATTGTTTTCGTCAACAATGCAGTGAATTTTTGTTACGCCAGAAACCTTGTCTTTG  |        |        |        |        |        |        |        |               |
| SARS-CoV-2 NC_045512.2 | (29904)  | -----                                                                                              |        |        |        |        |        |        |        |               |
|                        |          |                                                                                                    |        |        |        |        |        |        |        | Section 1532  |
|                        | (146977) | 146977                                                                                             | 146982 | 146993 | 147004 | 147015 | 147026 | 147037 | 147048 | 147059 147072 |
| T4 NC_000866.4         | (146243) | ACTTCATCTTCTTCAGAAAGTCGGTCTTTATATTTCGCGGAAACAATAAACTCTTCTTCACTAAGTTCAAATAATCATCACCCATACCATCATCA    |        |        |        |        |        |        |        |               |
| SARS-CoV-2 NC_045512.2 | (29904)  | -----                                                                                              |        |        |        |        |        |        |        |               |
|                        |          |                                                                                                    |        |        |        |        |        |        |        | Section 1533  |
|                        | (147073) | 147073                                                                                             | 147081 | 147092 | 147103 | 147114 | 147125 | 147136 | 147147 | 147168        |
| T4 NC_000866.4         | (146339) | TTATAGATTTACCATTTAGCACAAATGATTTTCGGTTACATAATCAAAGCCATCTAACTTGATATTGATTTAACTTCAAACCAACCGCCATTTTCT   |        |        |        |        |        |        |        |               |
| SARS-CoV-2 NC_045512.2 | (29904)  | -----                                                                                              |        |        |        |        |        |        |        |               |

## SARS-CoV-2 &amp; T4.apr

|                        |          |                                                                                                   |        |        |        |        |        |        |        |              |        |
|------------------------|----------|---------------------------------------------------------------------------------------------------|--------|--------|--------|--------|--------|--------|--------|--------------|--------|
|                        |          |                                                                                                   |        |        |        |        |        |        |        | Section 1534 |        |
|                        | (147169) | 147169                                                                                            | 147180 | 147191 | 147202 | 147213 | 147224 | 147235 | 147246 | 147264       |        |
| T4 NC 000866.4         | (146435) | TGAATGATGCCGACCATACTAGCATTGATGAACTAATATCAATGAAAGATTTAATACGATGTGGATTTAACTCGTATTTTTTGCCGATTTCATT    |        |        |        |        |        |        |        |              |        |
| SARS-CoV-2 NC_045512.2 | (29904)  | -----                                                                                             |        |        |        |        |        |        |        |              |        |
|                        |          |                                                                                                   |        |        |        |        |        |        |        | Section 1535 |        |
|                        | (147265) | 147265                                                                                            | 147279 | 147290 | 147301 | 147312 | 147323 | 147334 | 147345 | 147360       |        |
| T4 NC 000866.4         | (146531) | TTGATTTTCCTCATTTTAATAGGGGCTTGATAGCCCCCTTGATAATTATTGTTCAATCAGTCCCATGTAAAATTCTGCGTCTTCAGAATCCATGCCA |        |        |        |        |        |        |        |              |        |
| SARS-CoV-2 NC_045512.2 | (29904)  | -----                                                                                             |        |        |        |        |        |        |        |              |        |
|                        |          |                                                                                                   |        |        |        |        |        |        |        | Section 1536 |        |
|                        | (147361) | 147361                                                                                            | 147367 | 147378 | 147389 | 147400 | 147411 | 147422 | 147433 | 147444       | 147456 |
| T4 NC 000866.4         | (146627) | TCACAATATTCATTAGCCATAAAGCGGGTGAGGTCTTCAAGAGGACCTTCAATAACGATTTGAATACTCCAAAACCTTAGAATCTTGCACGCTTGTG |        |        |        |        |        |        |        |              |        |
| SARS-CoV-2 NC_045512.2 | (29904)  | -----                                                                                             |        |        |        |        |        |        |        |              |        |
|                        |          |                                                                                                   |        |        |        |        |        |        |        | Section 1537 |        |
|                        | (147457) | 147457                                                                                            | 147466 | 147477 | 147488 | 147499 | 147510 | 147521 | 147532 | 147552       |        |
| T4 NC 000866.4         | (146723) | ATACTAAGTTCAGGATAACGATTACGAATAATCTCTTCAATATATTCAAAATCAACGATGTCAATATCAACTTTAGCCATATTATTTTCCTCTTTA  |        |        |        |        |        |        |        |              |        |
| SARS-CoV-2 NC_045512.2 | (29904)  | -----                                                                                             |        |        |        |        |        |        |        |              |        |
|                        |          |                                                                                                   |        |        |        |        |        |        |        | Section 1538 |        |
|                        | (147553) | 147553                                                                                            | 147565 | 147576 | 147587 | 147598 | 147609 | 147620 | 147631 | 147648       |        |
| T4 NC 000866.4         | (146819) | ATTATTAGCAGTATTGCCGATAGTTGTATAGTACCATAAAGCTTTATGCTTGTAACCGTTTTGTGAAAAAATTTTAAATAAAAAAGGGGACCT     |        |        |        |        |        |        |        |              |        |
| SARS-CoV-2 NC_045512.2 | (29904)  | -----                                                                                             |        |        |        |        |        |        |        |              |        |
|                        |          |                                                                                                   |        |        |        |        |        |        |        | Section 1539 |        |
|                        | (147649) | 147649                                                                                            | 147664 | 147675 | 147686 | 147697 | 147708 | 147719 | 147730 | 147744       |        |
| T4 NC 000866.4         | (146915) | CTAGGGTCCCCAATTAATTAGTAATATAATCTATTAAAGGTCATTCAAAAGGTCATCCAGGTCCGTGTCATCAGCACTAGATGAACTACCAGAGCT  |        |        |        |        |        |        |        |              |        |
| SARS-CoV-2 NC_045512.2 | (29904)  | -----                                                                                             |        |        |        |        |        |        |        |              |        |
|                        |          |                                                                                                   |        |        |        |        |        |        |        | Section 1540 |        |
|                        | (147745) | 147745                                                                                            | 147752 | 147763 | 147774 | 147785 | 147796 | 147807 | 147818 | 147829       | 147840 |
| T4 NC 000866.4         | (147011) | TGAGCTCATAAAATCATCTTCAGTTTTTGTATTGAAGTCATCAACATTGAATGCATCCAAATCATCAGCCACTTTATCAGCTTTCTTAGCAGCAGT  |        |        |        |        |        |        |        |              |        |
| SARS-CoV-2 NC_045512.2 | (29904)  | -----                                                                                             |        |        |        |        |        |        |        |              |        |

## SARS-CoV-2 &amp; T4.apr

|                        |          |                                                                                                    |        |        |        |        |        |        |        |              |        |
|------------------------|----------|----------------------------------------------------------------------------------------------------|--------|--------|--------|--------|--------|--------|--------|--------------|--------|
|                        |          |                                                                                                    |        |        |        |        |        |        |        | Section 1541 |        |
|                        | (147841) | 147841                                                                                             | 147851 | 147862 | 147873 | 147884 | 147895 | 147906 | 147917 | 147936       |        |
| T4 NC 000866.4         | (147107) | TGCAGCAGCACCGCCCATCACAGCAGTTCCCATAACTTGACCGAATTTAGTATTAAGTTCTTCAAACGATTTGAATTTATCTTTAGAAGTCATTTCTC |        |        |        |        |        |        |        |              |        |
| SARS-CoV-2 NC_045512.2 | (29904)  | -----                                                                                              |        |        |        |        |        |        |        |              |        |
|                        |          |                                                                                                    |        |        |        |        |        |        |        | Section 1542 |        |
|                        | (147937) | 147937                                                                                             | 147950 | 147961 | 147972 | 147983 | 147994 | 148005 | 148016 | 148032       |        |
| T4 NC 000866.4         | (147203) | AGAAAGGTCAACCATTGTTCGAACAGTTCTTTCTGGAAAGATTCATCGTCAATGTTTGGAATCGCAGATTGATTCAGGAATTTAGATTCATCGTAT   |        |        |        |        |        |        |        |              |        |
| SARS-CoV-2 NC_045512.2 | (29904)  | -----                                                                                              |        |        |        |        |        |        |        |              |        |
|                        |          |                                                                                                    |        |        |        |        |        |        |        | Section 1543 |        |
|                        | (148033) | 148033                                                                                             | 148038 | 148049 | 148060 | 148071 | 148082 | 148093 | 148104 | 148115       | 148128 |
| T4 NC 000866.4         | (147299) | GTTACTAAATCCAGAACTTGTTTAACTTTTCAGTACAAAGTTAGCACCTTCCCACGGACAAGTTACATCAACTGGAGTTTCACCCATTTCAACATC   |        |        |        |        |        |        |        |              |        |
| SARS-CoV-2 NC_045512.2 | (29904)  | -----                                                                                              |        |        |        |        |        |        |        |              |        |
|                        |          |                                                                                                    |        |        |        |        |        |        |        | Section 1544 |        |
|                        | (148129) | 148129                                                                                             | 148137 | 148148 | 148159 | 148170 | 148181 | 148192 | 148203 | 148224       |        |
| T4 NC 000866.4         | (147395) | AACCGCAATCATTGCATTGATTTTATCCAGATTTTCTTACCAAAGCGGTATTTAAATACTTTACCTTCGTTTTCTGGAGCAGCTGGGTCTTTTAC    |        |        |        |        |        |        |        |              |        |
| SARS-CoV-2 NC_045512.2 | (29904)  | -----                                                                                              |        |        |        |        |        |        |        |              |        |
|                        |          |                                                                                                    |        |        |        |        |        |        |        | Section 1545 |        |
|                        | (148225) | 148225                                                                                             | 148236 | 148247 | 148258 | 148269 | 148280 | 148291 | 148302 | 148320       |        |
| T4 NC 000866.4         | (147491) | TACAAGAATGTTAGCCCAAGTAAGAAGTTTACGTTTAAACAAGACTGTACTCTTTATTGTCAGTGTTGTATAGATCATTTTTACTGATGTATTGACA  |        |        |        |        |        |        |        |              |        |
| SARS-CoV-2 NC_045512.2 | (29904)  | -----                                                                                              |        |        |        |        |        |        |        |              |        |
|                        |          |                                                                                                    |        |        |        |        |        |        |        | Section 1546 |        |
|                        | (148321) | 148321                                                                                             | 148335 | 148346 | 148357 | 148368 | 148379 | 148390 | 148401 | 148416       |        |
| T4 NC 000866.4         | (147587) | TACTGGGCAAGAATCGTAATCACCATGGGTAGATGAACATGTTTCAATATACCATTTACCATTTTTCTTGAAACCGTGATTTACAAGAATTGCCAA   |        |        |        |        |        |        |        |              |        |
| SARS-CoV-2 NC_045512.2 | (29904)  | -----                                                                                              |        |        |        |        |        |        |        |              |        |
|                        |          |                                                                                                    |        |        |        |        |        |        |        | Section 1547 |        |
|                        | (148417) | 148417                                                                                             | 148423 | 148434 | 148445 | 148456 | 148467 | 148478 | 148489 | 148500       | 148512 |
| T4 NC 000866.4         | (147683) | TGGTGCTTGTTTCATCATTTTTAGACGGAAGAAAACGAATTACTGCTTGACCGTTACCCGCATTATCGAGTTTCAGTTTCCACTCGCCTTTATCTTC  |        |        |        |        |        |        |        |              |        |
| SARS-CoV-2 NC_045512.2 | (29904)  | -----                                                                                              |        |        |        |        |        |        |        |              |        |

## SARS-CoV-2 &amp; T4.apr

|                        |          |                                                                                                   |        |        |        |        |        |        |        |               |
|------------------------|----------|---------------------------------------------------------------------------------------------------|--------|--------|--------|--------|--------|--------|--------|---------------|
|                        |          |                                                                                                   |        |        |        |        |        |        |        | Section 1548  |
|                        | (148513) | 148513                                                                                            | 148522 | 148533 | 148544 | 148555 | 148566 | 148577 | 148588 | 148608        |
| T4 NC 000866.4         | (147779) | AGAAGAAAAACCTTTATTGCCATTCAGTTTAGCCATTTGTGCAGCGAGTTCAGCAGTAGATTACGTTTAAACATTTTTATTTTCCTTTTTTAATTTA |        |        |        |        |        |        |        |               |
| SARS-CoV-2 NC_045512.2 | (29904)  | -----                                                                                             |        |        |        |        |        |        |        |               |
|                        |          |                                                                                                   |        |        |        |        |        |        |        | Section 1549  |
|                        | (148609) | 148609                                                                                            | 148621 | 148632 | 148643 | 148654 | 148665 | 148676 | 148687 | 148704        |
| T4 NC 000866.4         | (147875) | ATTTAATTAACAGTTGGTGCATGACACTTTACCTCATAGCTGGCATAATTCGCAATACTCTGGGTCTTCGAGAGGTATCCAACCTGAGTTGAAAT   |        |        |        |        |        |        |        |               |
| SARS-CoV-2 NC_045512.2 | (29904)  | -----                                                                                             |        |        |        |        |        |        |        |               |
|                        |          |                                                                                                   |        |        |        |        |        |        |        | Section 1550  |
|                        | (148705) | 148705                                                                                            | 148720 | 148731 | 148742 | 148753 | 148764 | 148775 | 148786 | 148800        |
| T4 NC 000866.4         | (147971) | ACTTTACCATCGATTTAGCAGTTGTATCAGTTATATTTATATTACCTTTAACTCTTCGCCATCCAGGAGTTTTACCGTACAGATTAGAGGATAATA  |        |        |        |        |        |        |        |               |
| SARS-CoV-2 NC_045512.2 | (29904)  | -----                                                                                             |        |        |        |        |        |        |        |               |
|                        |          |                                                                                                   |        |        |        |        |        |        |        | Section 1551  |
|                        | (148801) | 148801                                                                                            | 148808 | 148819 | 148830 | 148841 | 148852 | 148863 | 148874 | 148885 148896 |
| T4 NC 000866.4         | (148067) | ATAACACATAATTCTCGTAAGCAATATGAGATAATTTCCAAGACTCTATATTAGCTCGTGATGTTTTCCAAGGTCTAAATCGTACGGTTCATAT    |        |        |        |        |        |        |        |               |
| SARS-CoV-2 NC_045512.2 | (29904)  | -----                                                                                             |        |        |        |        |        |        |        |               |
|                        |          |                                                                                                   |        |        |        |        |        |        |        | Section 1552  |
|                        | (148897) | 148897                                                                                            | 148907 | 148918 | 148929 | 148940 | 148951 | 148962 | 148973 | 148992        |
| T4 NC 000866.4         | (148163) | AATTAGCCAATCTCATATGCTCTCTAACTTCGGGTCTTTGGCTGGATGAGTTTCACCACTCACACCAAATCCACCACCAGCATATACCAGATTAA   |        |        |        |        |        |        |        |               |
| SARS-CoV-2 NC_045512.2 | (29904)  | -----                                                                                             |        |        |        |        |        |        |        |               |
|                        |          |                                                                                                   |        |        |        |        |        |        |        | Section 1553  |
|                        | (148993) | 148993                                                                                            | 149006 | 149017 | 149028 | 149039 | 149050 | 149061 | 149072 | 149088        |
| T4 NC 000866.4         | (148259) | AATAGTCTGGATTATCTCTGGCATTACTTCAAGTTGGTATTTTCGTTCTGCTTCAATAACATCCAAGTCATCATCAATTTGAATTATTTTAACGC   |        |        |        |        |        |        |        |               |
| SARS-CoV-2 NC_045512.2 | (29904)  | -----                                                                                             |        |        |        |        |        |        |        |               |
|                        |          |                                                                                                   |        |        |        |        |        |        |        | Section 1554  |
|                        | (149089) | 149089                                                                                            | 149094 | 149105 | 149116 | 149127 | 149138 | 149149 | 149160 | 149171 149184 |
| T4 NC 000866.4         | (148355) | TCGGTTTTTGAAGCATTAGCGCATTCAAAAATCTTTTTTGTTCATGAGCTCCAGTATTCCTTTCCGGAAGAGTCATATATTATTCGGTTCTCAA    |        |        |        |        |        |        |        |               |
| SARS-CoV-2 NC_045512.2 | (29904)  | -----                                                                                             |        |        |        |        |        |        |        |               |

## SARS-CoV-2 &amp; T4.apr

|                        |          |                                                                                                   |        |        |        |        |        |        |        |               |
|------------------------|----------|---------------------------------------------------------------------------------------------------|--------|--------|--------|--------|--------|--------|--------|---------------|
|                        |          |                                                                                                   |        |        |        |        |        |        |        | Section 1555  |
|                        | (149185) | 149185                                                                                            | 149193 | 149204 | 149215 | 149226 | 149237 | 149248 | 149259 | 149280        |
| T4 NC 000866.4         | (148451) | ATGAGCAATTTAATTTACTACCGATATAGTAGTATGGCGGAGTCTTATTTTGGACACGGTCTTCAAATGTAAACCAATATACTATATTCATATCAA  |        |        |        |        |        |        |        |               |
| SARS-CoV-2 NC_045512.2 | (29904)  | -----                                                                                             |        |        |        |        |        |        |        |               |
|                        |          |                                                                                                   |        |        |        |        |        |        |        | Section 1556  |
|                        | (149281) | 149281                                                                                            | 149292 | 149303 | 149314 | 149325 | 149336 | 149347 | 149358 | 149376        |
| T4 NC 000866.4         | (148457) | TACTTGCAAGATTTTCACAGTTTCAATGAAAACATTTTGTAGCTTTCTGTGAATCAATATTTAAATTTTCTATAAGCCTTTAACTTTATAGAATAA  |        |        |        |        |        |        |        |               |
| SARS-CoV-2 NC_045512.2 | (29904)  | -----                                                                                             |        |        |        |        |        |        |        |               |
|                        |          |                                                                                                   |        |        |        |        |        |        |        | Section 1557  |
|                        | (149377) | 149377                                                                                            | 149391 | 149402 | 149413 | 149424 | 149435 | 149446 | 149457 | 149472        |
| T4 NC 000866.4         | (148643) | TTATTCCAGACTAAATTATCAGTCTGTTTCATCATGTTTATCAATTATATTTAAAAACGAATCAAGCAAGATAAACGTCTCAAACGAAATTATGTTT |        |        |        |        |        |        |        |               |
| SARS-CoV-2 NC_045512.2 | (29904)  | -----                                                                                             |        |        |        |        |        |        |        |               |
|                        |          |                                                                                                   |        |        |        |        |        |        |        | Section 1558  |
|                        | (149473) | 149473                                                                                            | 149479 | 149490 | 149501 | 149512 | 149523 | 149534 | 149545 | 149556 149568 |
| T4 NC 000866.4         | (148739) | GATTGCAGAAAGTTTAAAAATATAACTTGATTGAACTTTTGGATTATACTCAAAAATTTCTTTAAAGCAGAACTTCAACTTTTTTACTAAAATAA   |        |        |        |        |        |        |        |               |
| SARS-CoV-2 NC_045512.2 | (29904)  | -----                                                                                             |        |        |        |        |        |        |        |               |
|                        |          |                                                                                                   |        |        |        |        |        |        |        | Section 1559  |
|                        | (149569) | 149569                                                                                            | 149578 | 149589 | 149600 | 149611 | 149622 | 149633 | 149644 | 149664        |
| T4 NC 000866.4         | (148835) | TAAATGTTGCGAATATCTTCTTCAAACCTAAATTTAATTTGCTTTAAGCGTCCGATATATTCACGATAAAACACAAGTGCATCAGCGTCAGAGATG  |        |        |        |        |        |        |        |               |
| SARS-CoV-2 NC_045512.2 | (29904)  | -----                                                                                             |        |        |        |        |        |        |        |               |
|                        |          |                                                                                                   |        |        |        |        |        |        |        | Section 1560  |
|                        | (149665) | 149665                                                                                            | 149677 | 149688 | 149699 | 149710 | 149721 | 149732 | 149743 | 149760        |
| T4 NC 000866.4         | (148931) | TCACCAATCCAAGCATCTTGGTTAGCAACCAAATTGCTTATAAAGATTAAAGCAAGTTCCTTTAATTTATATTTTTCTGATAACTTCTGGAAAAAA  |        |        |        |        |        |        |        |               |
| SARS-CoV-2 NC_045512.2 | (29904)  | -----                                                                                             |        |        |        |        |        |        |        |               |
|                        |          |                                                                                                   |        |        |        |        |        |        |        | Section 1561  |
|                        | (149761) | 149761                                                                                            | 149776 | 149787 | 149798 | 149809 | 149820 | 149831 | 149842 | 149856        |
| T4 NC 000866.4         | (149027) | TACTTATCCCTTCGCTTTTGATAAGCGGCATCAGACACCCGCATGCACCAATTATACTTAATTACATCATACTTTCCATTCATATGTTGTTTTATC  |        |        |        |        |        |        |        |               |
| SARS-CoV-2 NC_045512.2 | (29904)  | -----                                                                                             |        |        |        |        |        |        |        |               |

## SARS-CoV-2 &amp; T4.apr

|                        |          |                                                                                                   |        |        |        |        |        |        |        |               |
|------------------------|----------|---------------------------------------------------------------------------------------------------|--------|--------|--------|--------|--------|--------|--------|---------------|
|                        |          |                                                                                                   |        |        |        |        |        |        |        | Section 1562  |
|                        | (149857) | 149857                                                                                            | 149864 | 149875 | 149886 | 149897 | 149908 | 149919 | 149930 | 149941 149952 |
| T4 NC 000866.4         | (149123) | ATTAAGTATAATTTATAAACTGATTTACCATCAATGTATCTTTCACCACCAGCAGGCATGCGGAGTTTAATCATAGTAGAAAATCTAATGTATTAG  |        |        |        |        |        |        |        |               |
| SARS-CoV-2 NC_045512.2 | (29904)  | -----                                                                                             |        |        |        |        |        |        |        |               |
|                        |          |                                                                                                   |        |        |        |        |        |        |        | Section 1563  |
|                        | (149953) | 149953                                                                                            | 149963 | 149974 | 149985 | 149996 | 150007 | 150018 | 150029 | 150048        |
| T4 NC 000866.4         | (149719) | TTTTTTCACAACGAACAACAGAAGGACGTAAAAGATTTTCGTC AATAGCTTCTGACTGAATTTTTTCAATTATACCCGAAGGAATAAATTTAGCAA |        |        |        |        |        |        |        |               |
| SARS-CoV-2 NC_045512.2 | (29904)  | -----                                                                                             |        |        |        |        |        |        |        |               |
|                        |          |                                                                                                   |        |        |        |        |        |        |        | Section 1564  |
|                        | (150049) | 150049                                                                                            | 150062 | 150073 | 150084 | 150095 | 150106 | 150117 | 150128 | 150144        |
| T4 NC 000866.4         | (149315) | ATTGAGTTTCAGGAATAGAATTTTCTTCTAAGAATGCTGTTGTAGCTTCAAGATAACTCATTCCAAACTCTTCTACCATTTTTTCAATAATAAATC  |        |        |        |        |        |        |        |               |
| SARS-CoV-2 NC_045512.2 | (29904)  | -----                                                                                             |        |        |        |        |        |        |        |               |
|                        |          |                                                                                                   |        |        |        |        |        |        |        | Section 1565  |
|                        | (150145) | 150145                                                                                            | 150150 | 150161 | 150172 | 150183 | 150194 | 150205 | 150216 | 150227 150240 |
| T4 NC 000866.4         | (149411) | CATTTTCTTGCGGGTCAAGAAGCTTTGCTATTTTCATCCTTTTCTTCTTAAATTGAAAGTTCTTTTTCTGAAAGACCGGTCTCATCGACCGGACGAA |        |        |        |        |        |        |        |               |
| SARS-CoV-2 NC_045512.2 | (29904)  | -----                                                                                             |        |        |        |        |        |        |        |               |
|                        |          |                                                                                                   |        |        |        |        |        |        |        | Section 1566  |
|                        | (150241) | 150241                                                                                            | 150249 | 150260 | 150271 | 150282 | 150293 | 150304 | 150315 | 150336        |
| T4 NC 000866.4         | (149507) | TATCATTTAGAGAAAACGTGTGCATAAAGTTCAACTACCTCTTCAGTTTCAGCTTCAAACACATCACGGTTATCTTTATGATACAAAGCTAATAGA  |        |        |        |        |        |        |        |               |
| SARS-CoV-2 NC_045512.2 | (29904)  | -----                                                                                             |        |        |        |        |        |        |        |               |
|                        |          |                                                                                                   |        |        |        |        |        |        |        | Section 1567  |
|                        | (150337) | 150337                                                                                            | 150348 | 150359 | 150370 | 150381 | 150392 | 150403 | 150414 | 150432        |
| T4 NC 000866.4         | (149603) | CGATTAAACATCTTACCATCAACGCCAAGTTCATCTTTAGCACGAATTCGAATATCTTTAATCAGTTCATTATAACCGGAAATTTTCAGTTTATGA  |        |        |        |        |        |        |        |               |
| SARS-CoV-2 NC_045512.2 | (29904)  | -----                                                                                             |        |        |        |        |        |        |        |               |
|                        |          |                                                                                                   |        |        |        |        |        |        |        | Section 1568  |
|                        | (150433) | 150433                                                                                            | 150447 | 150458 | 150469 | 150480 | 150491 | 150502 | 150513 | 150528        |
| T4 NC 000866.4         | (149699) | TCAGATGCTTCTTTAATAAATTTAGCCAAGTCTTCGCCATGGATAGCTTCATCAAATTC AACCATTCTTTTTTAGCCATTATTCACCTCAAATTT  |        |        |        |        |        |        |        |               |
| SARS-CoV-2 NC_045512.2 | (29904)  | -----                                                                                             |        |        |        |        |        |        |        |               |



## SARS-CoV-2 &amp; T4.apr

|                        |          |                                                                                                    |        |        |        |        |        |        |        |        |              |
|------------------------|----------|----------------------------------------------------------------------------------------------------|--------|--------|--------|--------|--------|--------|--------|--------|--------------|
|                        |          |                                                                                                    |        |        |        |        |        |        |        |        | Section 1569 |
|                        | (150529) | 150529                                                                                             | 150535 | 150546 | 150557 | 150568 | 150579 | 150590 | 150601 | 150612 | 150624       |
| T4 NC 000866.4         | (149795) | CATTAATGCTATTAGTTAATTTAGAAAGACCCGCTTTTACAAAATATGAATAAATTTTGCCACGCGGTGGTAATTTATATGAATTATAGTAATTCA   |        |        |        |        |        |        |        |        |              |
| SARS-CoV-2 NC_045512.2 | (29904)  | -----                                                                                              |        |        |        |        |        |        |        |        |              |
|                        |          |                                                                                                    |        |        |        |        |        |        |        |        | Section 1570 |
|                        | (150625) | 150625                                                                                             | 150634 | 150645 | 150656 | 150667 | 150678 | 150689 | 150700 |        | 150720       |
| T4 NC 000866.4         | (149891) | CAATGTTTGAAGCAATATTATCAGGAATATAATCAAAATCAATTAGAACTAAATTTTCTTTATAACGATTATATTCAGATTCAGTGAGAAGCACCT   |        |        |        |        |        |        |        |        |              |
| SARS-CoV-2 NC_045512.2 | (29904)  | -----                                                                                              |        |        |        |        |        |        |        |        |              |
|                        |          |                                                                                                    |        |        |        |        |        |        |        |        | Section 1571 |
|                        | (150721) | 150721                                                                                             | 150733 | 150744 | 150755 | 150766 | 150777 | 150788 | 150799 |        | 150816       |
| T4 NC 000866.4         | (149987) | TAGCTTGCTCACGGTCATTAGCAATAGCTTCAACGATTGAAGTTTTTCATTGAAGGAGTTCGTTTCACCTTCAACTCTGGTAAACCAAAAGTCAGATC |        |        |        |        |        |        |        |        |              |
| SARS-CoV-2 NC_045512.2 | (29904)  | -----                                                                                              |        |        |        |        |        |        |        |        |              |
|                        |          |                                                                                                    |        |        |        |        |        |        |        |        | Section 1572 |
|                        | (150817) | 150817                                                                                             | 150832 | 150843 | 150854 | 150865 | 150876 | 150887 | 150898 |        | 150912       |
| T4 NC 000866.4         | (150083) | GTACTTTAACTGAAGCAACGTTATCCTTTTTGTGCGCTTTAAGGATTTTAGTCATACAGTCAATTTTCAGCAGAACCGCTTTTAAATTTTAACCCATT |        |        |        |        |        |        |        |        |              |
| SARS-CoV-2 NC_045512.2 | (29904)  | -----                                                                                              |        |        |        |        |        |        |        |        |              |
|                        |          |                                                                                                    |        |        |        |        |        |        |        |        | Section 1573 |
|                        | (150913) | 150913                                                                                             | 150920 | 150931 | 150942 | 150953 | 150964 | 150975 | 150986 | 150997 | 151008       |
| T4 NC 000866.4         | (150179) | TCTTATGCATCGGAGACCATTGCTTAACATTTGGATATTTGTGAAGCTGAGTAAAGTCACCATCTGACGAAATGATTAAAATCTTATGTCCTTCTA   |        |        |        |        |        |        |        |        |              |
| SARS-CoV-2 NC_045512.2 | (29904)  | -----                                                                                              |        |        |        |        |        |        |        |        |              |
|                        |          |                                                                                                    |        |        |        |        |        |        |        |        | Section 1574 |
|                        | (151009) | 151009                                                                                             | 151019 | 151030 | 151041 | 151052 | 151063 | 151074 | 151085 |        | 151104       |
| T4 NC 000866.4         | (150275) | AAGAGAACTTTTTAACAAGAACAGCAATGTGGTCATCTGCTTCATACTTATCAATATCCATAACAATGTATGGCATATAAGCTTTCAATTCATCTA   |        |        |        |        |        |        |        |        |              |
| SARS-CoV-2 NC_045512.2 | (29904)  | -----                                                                                              |        |        |        |        |        |        |        |        |              |
|                        |          |                                                                                                    |        |        |        |        |        |        |        |        | Section 1575 |
|                        | (151105) | 151105                                                                                             | 151118 | 151129 | 151140 | 151151 | 151162 | 151173 | 151184 |        | 151200       |
| T4 NC 000866.4         | (150371) | TAACTTTTATGGCTGGATTCAAAATAACCTTCCCAGTCCCAAGTAGATTCTTCTCGTGCTTTTCCACGGTTTTTCTTATAATAATAAGCGAAATCAC  |        |        |        |        |        |        |        |        |              |
| SARS-CoV-2 NC_045512.2 | (29904)  | -----                                                                                              |        |        |        |        |        |        |        |        |              |

## SARS-CoV-2 &amp; T4.apr

|                                |                                                                                                    |        |        |        |        |        |        |        |        |        |
|--------------------------------|----------------------------------------------------------------------------------------------------|--------|--------|--------|--------|--------|--------|--------|--------|--------|
| Section 1576                   |                                                                                                    |        |        |        |        |        |        |        |        |        |
| (151201)                       | 151201                                                                                             | 151206 | 151217 | 151228 | 151239 | 151250 | 151261 | 151272 | 151283 | 151296 |
| T4 NC 000866.4 (150467)        | GACGCCAATATCCAGATTTTCGCGTTATCAATACACAGTACAATTTTAGTGTATCCAAGCGTTTTTGCTTTTTTGACATTAACTTAATTGAGTTCA   |        |        |        |        |        |        |        |        |        |
| SARS-CoV-2 NC_045512.2 (29904) | -----                                                                                              |        |        |        |        |        |        |        |        |        |
| Section 1577                   |                                                                                                    |        |        |        |        |        |        |        |        |        |
| (151297)                       | 151297                                                                                             | 151305 | 151316 | 151327 | 151338 | 151349 | 151360 | 151371 |        | 151392 |
| T4 NC 000866.4 (150563)        | ATATCAAATGACGAACCATTGATAAATTAATTTTTCTTTATCTGGGAAGTTTACCAAAGCAGTTGAAAGCGCAATTTGACTAAAGTCAATTAAGC    |        |        |        |        |        |        |        |        |        |
| SARS-CoV-2 NC_045512.2 (29904) | -----                                                                                              |        |        |        |        |        |        |        |        |        |
| Section 1578                   |                                                                                                    |        |        |        |        |        |        |        |        |        |
| (151393)                       | 151393                                                                                             | 151404 | 151415 | 151426 | 151437 | 151448 | 151459 | 151470 |        | 151488 |
| T4 NC 000866.4 (150659)        | AGATTCTTCTTTGTAATCTTCATCCAACATCATTTCTAAATCCATATGAACCTCGTTCAATTAGTGAGATTTCTATTATATACCATCCAAATCTT    |        |        |        |        |        |        |        |        |        |
| SARS-CoV-2 NC_045512.2 (29904) | -----                                                                                              |        |        |        |        |        |        |        |        |        |
| Section 1579                   |                                                                                                    |        |        |        |        |        |        |        |        |        |
| (151489)                       | 151489                                                                                             | 151503 | 151514 | 151525 | 151536 | 151547 | 151558 | 151569 |        | 151584 |
| T4 NC 000866.4 (150755)        | AAAGTAAACAAGTATAAATACTTATTATTGAAAACACAATAGGAGCCCGGGAGAATGGCCGAGATTAAAGAGAATTCAGAGCAGAAGATGGTCTG    |        |        |        |        |        |        |        |        |        |
| SARS-CoV-2 NC_045512.2 (29904) | -----                                                                                              |        |        |        |        |        |        |        |        |        |
| Section 1580                   |                                                                                                    |        |        |        |        |        |        |        |        |        |
| (151585)                       | 151585                                                                                             | 151591 | 151602 | 151613 | 151624 | 151635 | 151646 | 151657 | 151668 | 151680 |
| T4 NC 000866.4 (150851)        | GACGCAGGTGGTGATAAAATAATCAACGTAGCTTTAGCTGATCGTACCGTAGGAAGTACGGTGTTAACGTTGATTACTTAATTCAAGAAAACACA    |        |        |        |        |        |        |        |        |        |
| SARS-CoV-2 NC_045512.2 (29904) | -----                                                                                              |        |        |        |        |        |        |        |        |        |
| Section 1581                   |                                                                                                    |        |        |        |        |        |        |        |        |        |
| (151681)                       | 151681                                                                                             | 151690 | 151701 | 151712 | 151723 | 151734 | 151745 | 151756 |        | 151776 |
| T4 NC 000866.4 (150947)        | GTTCAACAGTATGATCCAACCTCGTGGATATTTAAAAGATTTTGTAAATCATTTATGATAACCGCTTTTGGGCTGCTATAAATGATATTCCAAAACCA |        |        |        |        |        |        |        |        |        |
| SARS-CoV-2 NC_045512.2 (29904) | -----                                                                                              |        |        |        |        |        |        |        |        |        |
| Section 1582                   |                                                                                                    |        |        |        |        |        |        |        |        |        |
| (151777)                       | 151777                                                                                             | 151789 | 151800 | 151811 | 151822 | 151833 | 151844 | 151855 |        | 151872 |
| T4 NC 000866.4 (151043)        | GCAGGAGCTTTTAAATAGCGGACGCTGGAGAGCATTACGTACCGATGCTAACTGGATTACGGTTTCATCTGGTTCATATCAATTAAAATCTGGTGAA  |        |        |        |        |        |        |        |        |        |
| SARS-CoV-2 NC_045512.2 (29904) | -----                                                                                              |        |        |        |        |        |        |        |        |        |

## SARS-CoV-2 &amp; T4.apr

|                        |          |                                                                                                   |        |        |        |        |        |        |        |               |
|------------------------|----------|---------------------------------------------------------------------------------------------------|--------|--------|--------|--------|--------|--------|--------|---------------|
|                        |          |                                                                                                   |        |        |        |        |        |        |        | Section 1583  |
|                        | (151873) | 151873                                                                                            | 151888 | 151899 | 151910 | 151921 | 151932 | 151943 | 151954 | 151968        |
| T4 NC_000866.4         | (151139) | GCAATTTTCGGTTAACACCGCAGCTGGAAATGACATCACGTTTACTTTACCATCTTCTCCAATTGATGGTGATACTATCGTTCTCCAAGATATTGGA |        |        |        |        |        |        |        |               |
| SARS-CoV-2 NC_045512.2 | (29904)  | -----                                                                                             |        |        |        |        |        |        |        |               |
|                        |          |                                                                                                   |        |        |        |        |        |        |        | Section 1584  |
|                        | (151969) | 151969                                                                                            | 151976 | 151987 | 151998 | 152009 | 152020 | 152031 | 152042 | 152053 152064 |
| T4 NC_000866.4         | (151735) | GGAAAACCTGGAGTTAACCAAGTTTTTAATTGTAGCTCCAGTACAAAGTATTGTAACTTTAGAGGTGAACAGGTACGTTTCAGTACTAATGACTCAT |        |        |        |        |        |        |        |               |
| SARS-CoV-2 NC_045512.2 | (29904)  | -----                                                                                             |        |        |        |        |        |        |        |               |
|                        |          |                                                                                                   |        |        |        |        |        |        |        | Section 1585  |
|                        | (152065) | 152065                                                                                            | 152075 | 152086 | 152097 | 152108 | 152119 | 152130 | 152141 | 152160        |
| T4 NC_000866.4         | (151331) | CCAAAGTCACAGCTAGTTTTAATTTTTAGTAATCGTCTGTGGCAAATGTATGTTGCTGATTATAGTAGAGAAGCTATAGTTGTAACACCAGCGAAT  |        |        |        |        |        |        |        |               |
| SARS-CoV-2 NC_045512.2 | (29904)  | -----                                                                                             |        |        |        |        |        |        |        |               |
|                        |          |                                                                                                   |        |        |        |        |        |        |        | Section 1586  |
|                        | (152161) | 152161                                                                                            | 152174 | 152185 | 152196 | 152207 | 152218 | 152229 | 152240 | 152256        |
| T4 NC_000866.4         | (151477) | ACTTATCAAGCGCAATCCAACGATTTTATCGTACGTAGATTTACTTCTGCTGCACCAATTAATGTCAAACCTCCAAGATTTGCTAATCATGGCGAT  |        |        |        |        |        |        |        |               |
| SARS-CoV-2 NC_045512.2 | (29904)  | -----                                                                                             |        |        |        |        |        |        |        |               |
|                        |          |                                                                                                   |        |        |        |        |        |        |        | Section 1587  |
|                        | (152257) | 152257                                                                                            | 152262 | 152273 | 152284 | 152295 | 152306 | 152317 | 152328 | 152339 152352 |
| T4 NC_000866.4         | (151523) | ATTATTAATTTTCGTCGATTTAGATAAACTAAATCCGCTTTATCATACAATTGTTACTACATACGATGAAACGACTTCAGTACAAGAAGTTGGAAC  |        |        |        |        |        |        |        |               |
| SARS-CoV-2 NC_045512.2 | (29904)  | -----                                                                                             |        |        |        |        |        |        |        |               |
|                        |          |                                                                                                   |        |        |        |        |        |        |        | Section 1588  |
|                        | (152353) | 152353                                                                                            | 152361 | 152372 | 152383 | 152394 | 152405 | 152416 | 152427 | 152448        |
| T4 NC_000866.4         | (151619) | CATTCCATTGAAGGCCGTACATCGATTGACGGTTTCTTGATGTTTGATGATAATGAGAAATTATGGAGACTGTTTGACGGGGATAGTAAAGCGCGT  |        |        |        |        |        |        |        |               |
| SARS-CoV-2 NC_045512.2 | (29904)  | -----                                                                                             |        |        |        |        |        |        |        |               |
|                        |          |                                                                                                   |        |        |        |        |        |        |        | Section 1589  |
|                        | (152449) | 152449                                                                                            | 152460 | 152471 | 152482 | 152493 | 152504 | 152515 | 152526 | 152544        |
| T4 NC_000866.4         | (151715) | TTACGTATCATAACGACTAATTCAAACATTCGTCCAAATGAAGAAGTTATGGTATTTGGTGCGAATAACGGAACAACCTCAAACAATTGAGCTTAAG |        |        |        |        |        |        |        |               |
| SARS-CoV-2 NC_045512.2 | (29904)  | -----                                                                                             |        |        |        |        |        |        |        |               |

## SARS-CoV-2 &amp; T4.apr

|                        |          |                                                                                                   |        |        |        |        |        |        |        |               |
|------------------------|----------|---------------------------------------------------------------------------------------------------|--------|--------|--------|--------|--------|--------|--------|---------------|
|                        |          |                                                                                                   |        |        |        |        |        |        |        | Section 1590  |
|                        | (152545) | 152545                                                                                            | 152559 | 152570 | 152581 | 152592 | 152603 | 152614 | 152625 | 152640        |
| T4 NC_000866.4         | (151811) | CTTCCAAC TAATATTTCTGTTGGTGATACTGTTAAAATTTCCATGAATTACATGAGAAAAGGACAAACAGTTAAAATCAAAGCTGCTGATGAAGAT |        |        |        |        |        |        |        |               |
| SARS-CoV-2 NC_045512.2 | (29904)  | -----                                                                                             |        |        |        |        |        |        |        |               |
|                        |          |                                                                                                   |        |        |        |        |        |        |        | Section 1591  |
|                        | (152641) | 152641                                                                                            | 152647 | 152658 | 152669 | 152680 | 152691 | 152702 | 152713 | 152724 152736 |
| T4 NC_000866.4         | (151907) | AAAATTGCTTCTTCAGTTCAATTGCTGCAATTCCCAAAACGCTCAGAATATCCACCTGAAGCTGAATGGGTTACAGTTCAAGAATTAGTTTTTTAAC |        |        |        |        |        |        |        |               |
| SARS-CoV-2 NC_045512.2 | (29904)  | -----                                                                                             |        |        |        |        |        |        |        |               |
|                        |          |                                                                                                   |        |        |        |        |        |        |        | Section 1592  |
|                        | (152737) | 152737                                                                                            | 152746 | 152757 | 152768 | 152779 | 152790 | 152801 | 152812 | 152832        |
| T4 NC_000866.4         | (152003) | GATGAAACTAATTATGTTCCAGTTTGGAGCTTGCTTACATAGAAGATTCTGATGGAAAATATTGGGTTGTACAGCAAAACGTTCCAACGTGTAGAA  |        |        |        |        |        |        |        |               |
| SARS-CoV-2 NC_045512.2 | (29904)  | -----                                                                                             |        |        |        |        |        |        |        |               |
|                        |          |                                                                                                   |        |        |        |        |        |        |        | Section 1593  |
|                        | (152833) | 152833                                                                                            | 152845 | 152856 | 152867 | 152878 | 152889 | 152900 | 152911 | 152928        |
| T4 NC_000866.4         | (152099) | AGAGTAGATTCTTTAAATGATTCTACTAGAGCAAGATTAGGCGTAATTGCTTTAGCTACACAAGCTCAAGCTAATGTCTGATTTAGAAAATCTCCA  |        |        |        |        |        |        |        |               |
| SARS-CoV-2 NC_045512.2 | (29904)  | -----                                                                                             |        |        |        |        |        |        |        |               |
|                        |          |                                                                                                   |        |        |        |        |        |        |        | Section 1594  |
|                        | (152929) | 152929                                                                                            | 152944 | 152955 | 152966 | 152977 | 152988 | 152999 | 153010 | 153024        |
| T4 NC_000866.4         | (152195) | CAAAAAGAATTAGCAATTACTCCAGAAACGTTAGCTAATCGTACTGCTACAGAAACTCGCAGAGGTATTGCAAGAATAGCAACTACTGCTCAAGTG  |        |        |        |        |        |        |        |               |
| SARS-CoV-2 NC_045512.2 | (29904)  | -----                                                                                             |        |        |        |        |        |        |        |               |
|                        |          |                                                                                                   |        |        |        |        |        |        |        | Section 1595  |
|                        | (153025) | 153025                                                                                            | 153032 | 153043 | 153054 | 153065 | 153076 | 153087 | 153098 | 153109 153120 |
| T4 NC_000866.4         | (152291) | AATCAGAACACCACATTCTCTTTTGCTGATGATATTATCATCACTCCTAAAAAGCTGAATGAAAGAACTGCTACAGAAACTCGTAGAGGTGTCGCA  |        |        |        |        |        |        |        |               |
| SARS-CoV-2 NC_045512.2 | (29904)  | -----                                                                                             |        |        |        |        |        |        |        |               |
|                        |          |                                                                                                   |        |        |        |        |        |        |        | Section 1596  |
|                        | (153121) | 153121                                                                                            | 153131 | 153142 | 153153 | 153164 | 153175 | 153186 | 153197 | 153216        |
| T4 NC_000866.4         | (152387) | GAAATTGCTACGCAGCAAGAACTAATGCAGGAACCGATGATACTACAATCATCACTCCTAAAAAGCTTCAAGCTCGTCAAGGTTCTGAATCATT    |        |        |        |        |        |        |        |               |
| SARS-CoV-2 NC_045512.2 | (29904)  | -----                                                                                             |        |        |        |        |        |        |        |               |

## SARS-CoV-2 &amp; T4.apr

|                        |          |                                                                                                   |        |        |        |        |        |        |        |              |        |
|------------------------|----------|---------------------------------------------------------------------------------------------------|--------|--------|--------|--------|--------|--------|--------|--------------|--------|
|                        |          |                                                                                                   |        |        |        |        |        |        |        | Section 1597 |        |
|                        | (153217) | 153217                                                                                            | 153230 | 153241 | 153252 | 153263 | 153274 | 153285 | 153296 | 153312       |        |
| T4 NC_000866.4         | (152483) | TCTGGTATTGTAACCTTTGTATCTACTGCAGGTGCTACTCCAGCTTCTAGCCGTGAATTAAATGGTACGAATGTTTATAATAAAAAACACTGATAAT |        |        |        |        |        |        |        |              |        |
| SARS-CoV-2 NC_045512.2 | (29904)  | -----                                                                                             |        |        |        |        |        |        |        |              |        |
|                        |          |                                                                                                   |        |        |        |        |        |        |        | Section 1598 |        |
|                        | (153313) | 153313                                                                                            | 153318 | 153329 | 153340 | 153351 | 153362 | 153373 | 153384 | 153395       | 153408 |
| T4 NC_000866.4         | (152579) | TTAGTTGTTTCACCTAAAGCTTTGGATCAGTATAAAGCTACTCCAACACAGCAAGGTGCAGTAATTTTAGCAGTTGAAAGTGAAGTAATTGCTGGA  |        |        |        |        |        |        |        |              |        |
| SARS-CoV-2 NC_045512.2 | (29904)  | -----                                                                                             |        |        |        |        |        |        |        |              |        |
|                        |          |                                                                                                   |        |        |        |        |        |        |        | Section 1599 |        |
|                        | (153409) | 153409                                                                                            | 153417 | 153428 | 153439 | 153450 | 153461 | 153472 | 153483 | 153504       |        |
| T4 NC_000866.4         | (152675) | CAAAGTCAGCAAGGATGGGCAAATGCTGTTGTAACGCCAGAAACGTTACATAAAAAGACATCAACTGATGGAAGAATTGGTTTAATTGAAATTGCT  |        |        |        |        |        |        |        |              |        |
| SARS-CoV-2 NC_045512.2 | (29904)  | -----                                                                                             |        |        |        |        |        |        |        |              |        |
|                        |          |                                                                                                   |        |        |        |        |        |        |        | Section 1600 |        |
|                        | (153505) | 153505                                                                                            | 153516 | 153527 | 153538 | 153549 | 153560 | 153571 | 153582 | 153600       |        |
| T4 NC_000866.4         | (152771) | ACGCAAAGTGAAGTTAATACAGGAACTGATTATACTCGTGCAGTCACTCCTAAACCTTTAAATGACCGTAGAGCAACTGAAAGTTTAAGTGGTATA  |        |        |        |        |        |        |        |              |        |
| SARS-CoV-2 NC_045512.2 | (29904)  | -----                                                                                             |        |        |        |        |        |        |        |              |        |
|                        |          |                                                                                                   |        |        |        |        |        |        |        | Section 1601 |        |
|                        | (153601) | 153601                                                                                            | 153615 | 153626 | 153637 | 153648 | 153659 | 153670 | 153681 | 153696       |        |
| T4 NC_000866.4         | (152867) | GCTGAAATTGCTACACAAGTTGAATTCGACGCAGGCGTCGACGATACTCGTATCTCTACACCATTAAAAATTAAACCAGATTTAATAGTACTGAT   |        |        |        |        |        |        |        |              |        |
| SARS-CoV-2 NC_045512.2 | (29904)  | -----                                                                                             |        |        |        |        |        |        |        |              |        |
|                        |          |                                                                                                   |        |        |        |        |        |        |        | Section 1602 |        |
|                        | (153697) | 153697                                                                                            | 153703 | 153714 | 153725 | 153736 | 153747 | 153758 | 153769 | 153780       | 153792 |
| T4 NC_000866.4         | (152963) | CGTACTTCTGTTGTTGCTCTATCTGGATTAGTTGAATCAGGAACTCTCTGGGACCATTATACACTTAATATTCTTGAAGCAAATGAGACACAACGT  |        |        |        |        |        |        |        |              |        |
| SARS-CoV-2 NC_045512.2 | (29904)  | -----                                                                                             |        |        |        |        |        |        |        |              |        |
|                        |          |                                                                                                   |        |        |        |        |        |        |        | Section 1603 |        |
|                        | (153793) | 153793                                                                                            | 153802 | 153813 | 153824 | 153835 | 153846 | 153857 | 153868 | 153888       |        |
| T4 NC_000866.4         | (153059) | GGTACACTTCGTGTAGCTACGCAGGTGCGGGAACATTAGATAATGTTTTAATAACTCCTAAAAAGCTTTTAGGTACTAAATCTACT            |        |        |        |        |        |        |        |              |        |
| SARS-CoV-2 NC_045512.2 | (29904)  | -----                                                                                             |        |        |        |        |        |        |        |              |        |

## SARS-CoV-2 &amp; T4.apr

|                        |          |                                                                                                    |        |        |        |        |        |        |        |               |
|------------------------|----------|----------------------------------------------------------------------------------------------------|--------|--------|--------|--------|--------|--------|--------|---------------|
|                        |          |                                                                                                    |        |        |        |        |        |        |        | Section 1604  |
|                        | (153889) | 153889                                                                                             | 153901 | 153912 | 153923 | 153934 | 153945 | 153956 | 153967 | 153984        |
| T4 NC 000866.4         | (153155) | GAAGCGCAAGAGGGTGTATTAAAGTTGCAACTCAGTCTGAAACTGTGACTGGAACGTCAGCAAATACTGCTGTATCTCCAAAAATTTAAATGG      |        |        |        |        |        |        |        |               |
| SARS-CoV-2 NC_045512.2 | (29904)  | -----                                                                                              |        |        |        |        |        |        |        |               |
|                        |          |                                                                                                    |        |        |        |        |        |        |        | Section 1605  |
|                        | (153985) | 153985                                                                                             | 154000 | 154011 | 154022 | 154033 | 154044 | 154055 | 154066 | 154080        |
| T4 NC 000866.4         | (153251) | ATTGCGCAGAGTGAACCTACTTGGGCAGCTACTACTGCAATAAGAGGTTTTGTTAAACTTCATCTGGTTCAATTACATTCGTTGGTAATGATACA    |        |        |        |        |        |        |        |               |
| SARS-CoV-2 NC_045512.2 | (29904)  | -----                                                                                              |        |        |        |        |        |        |        |               |
|                        |          |                                                                                                    |        |        |        |        |        |        |        | Section 1606  |
|                        | (154081) | 154081                                                                                             | 154088 | 154099 | 154110 | 154121 | 154132 | 154143 | 154154 | 154165 154176 |
| T4 NC 000866.4         | (153347) | GTCGGTTCTACCCAAGATTTAGAACTGTATGAGAAAAATAGCTATGCGGTATCACCATATGAATTAAACCGTGTATTAGCAAATTATTTGCCACTA   |        |        |        |        |        |        |        |               |
| SARS-CoV-2 NC_045512.2 | (29904)  | -----                                                                                              |        |        |        |        |        |        |        |               |
|                        |          |                                                                                                    |        |        |        |        |        |        |        | Section 1607  |
|                        | (154177) | 154177                                                                                             | 154187 | 154198 | 154209 | 154220 | 154231 | 154242 | 154253 | 154272        |
| T4 NC 000866.4         | (153443) | AAAGCAAAAGCTGCTGATACAAATTTATTGGATGGTCTAGATTTCATCTCAGTTCATTTCGTAGGGATATTGCACAGACGGTTAATGGTTCACTAACC |        |        |        |        |        |        |        |               |
| SARS-CoV-2 NC_045512.2 | (29904)  | -----                                                                                              |        |        |        |        |        |        |        |               |
|                        |          |                                                                                                    |        |        |        |        |        |        |        | Section 1608  |
|                        | (154273) | 154273                                                                                             | 154286 | 154297 | 154308 | 154319 | 154330 | 154341 | 154352 | 154368        |
| T4 NC 000866.4         | (153539) | TTAACCCAACAAACGAATCTGAGTGCCCTCTTGTATCATCTAGTACTGGTGAATTTGGTGGTTCATTGGCCGCTAATAGAACATTTACCATCCGT    |        |        |        |        |        |        |        |               |
| SARS-CoV-2 NC_045512.2 | (29904)  | -----                                                                                              |        |        |        |        |        |        |        |               |
|                        |          |                                                                                                    |        |        |        |        |        |        |        | Section 1609  |
|                        | (154369) | 154369                                                                                             | 154374 | 154385 | 154396 | 154407 | 154418 | 154429 | 154440 | 154451 154464 |
| T4 NC 000866.4         | (153635) | AATACAGGAGCCCCGACTAGTATCGTTTTTCGAAAAAGGTCCTGCATCCGGGGCAAATCCTGCACAGTCAATGAGTATTCGTGTATGGGGTAACCAA  |        |        |        |        |        |        |        |               |
| SARS-CoV-2 NC_045512.2 | (29904)  | -----                                                                                              |        |        |        |        |        |        |        |               |
|                        |          |                                                                                                    |        |        |        |        |        |        |        | Section 1610  |
|                        | (154465) | 154465                                                                                             | 154473 | 154484 | 154495 | 154506 | 154517 | 154528 | 154539 | 154560        |
| T4 NC 000866.4         | (153731) | TTTGGCGGCGGTAGTGATACGACCCGTTTCGACAGTGTGTTGAAGTTGGCGATGACACATCTCATCACTTTTATTCTCAACGTAATAAAGACGGTAAT |        |        |        |        |        |        |        |               |
| SARS-CoV-2 NC_045512.2 | (29904)  | -----                                                                                              |        |        |        |        |        |        |        |               |

## SARS-CoV-2 &amp; T4.apr

|                        |          |                                                                                                    |        |        |        |        |        |        |        |               |
|------------------------|----------|----------------------------------------------------------------------------------------------------|--------|--------|--------|--------|--------|--------|--------|---------------|
|                        |          |                                                                                                    |        |        |        |        |        |        |        | Section 1611  |
|                        | (154561) | 154561                                                                                             | 154572 | 154583 | 154594 | 154605 | 154616 | 154627 | 154638 | 154656        |
| T4 NC 000866.4         | (153827) | ATAGCGTTTAAACATTAATGGTACTGTAATGCCAATAAACATTAATGCTTCCGGTTTGATGAATGTGAATGGCACTGCAACATTCGGTCGTTTCAGTT |        |        |        |        |        |        |        |               |
| SARS-CoV-2 NC_045512.2 | (29904)  | -----                                                                                              |        |        |        |        |        |        |        |               |
|                        |          |                                                                                                    |        |        |        |        |        |        |        | Section 1612  |
|                        | (154657) | 154657                                                                                             | 154671 | 154682 | 154693 | 154704 | 154715 | 154726 | 154737 | 154752        |
| T4 NC 000866.4         | (153923) | ACAGCCAATGGTGAATTCATCAGCAAGTCTGCAAATGCTTTTAGAGCAATAAACGGTGATTACGGATTCTTTATTCGTAATGATGCCTCTAATACC   |        |        |        |        |        |        |        |               |
| SARS-CoV-2 NC_045512.2 | (29904)  | -----                                                                                              |        |        |        |        |        |        |        |               |
|                        |          |                                                                                                    |        |        |        |        |        |        |        | Section 1613  |
|                        | (154753) | 154753                                                                                             | 154759 | 154770 | 154781 | 154792 | 154803 | 154814 | 154825 | 154836 154848 |
| T4 NC 000866.4         | (154019) | TATTTTTTGTCTACTGCAGCCGGTGATCAGACTGGTGGTTTTAATGGATTACGCCCATTTAATTAATAATCAATCCGGTCAGATTACAATTGGT     |        |        |        |        |        |        |        |               |
| SARS-CoV-2 NC_045512.2 | (29904)  | -----                                                                                              |        |        |        |        |        |        |        |               |
|                        |          |                                                                                                    |        |        |        |        |        |        |        | Section 1614  |
|                        | (154849) | 154849                                                                                             | 154858 | 154869 | 154880 | 154891 | 154902 | 154913 | 154924 | 154944        |
| T4 NC 000866.4         | (154115) | GAAGGCTTAATCATTGCCAAAGGTGTTACTATAAATTCAGGCGGTTTAACTGTAACTCGAGAATTCGTTCTCAGGGTACTAAAACATCTGATTTA    |        |        |        |        |        |        |        |               |
| SARS-CoV-2 NC_045512.2 | (29904)  | -----                                                                                              |        |        |        |        |        |        |        |               |
|                        |          |                                                                                                    |        |        |        |        |        |        |        | Section 1615  |
|                        | (154945) | 154945                                                                                             | 154957 | 154968 | 154979 | 154990 | 155001 | 155012 | 155023 | 155040        |
| T4 NC 000866.4         | (154211) | TATACCCGTGCGCCAACATCTGATACTGTAGGATTCTGGTCAATCGATATTAATGATTACGCCACTTATAACCAGTTCCCGGGTTATTTTAAATG    |        |        |        |        |        |        |        |               |
| SARS-CoV-2 NC_045512.2 | (29904)  | -----                                                                                              |        |        |        |        |        |        |        |               |
|                        |          |                                                                                                    |        |        |        |        |        |        |        | Section 1616  |
|                        | (155041) | 155041                                                                                             | 155056 | 155067 | 155078 | 155089 | 155100 | 155111 | 155122 | 155136        |
| T4 NC 000866.4         | (154307) | GTTGAAAAAACTAATGAAGTGACTGGGCTTCCATACTTAGAACGTGGCGAAGAAGTTAAATCTCCTGGTACACTGACTCAGTTTGGTAACACACTT   |        |        |        |        |        |        |        |               |
| SARS-CoV-2 NC_045512.2 | (29904)  | -----                                                                                              |        |        |        |        |        |        |        |               |
|                        |          |                                                                                                    |        |        |        |        |        |        |        | Section 1617  |
|                        | (155137) | 155137                                                                                             | 155144 | 155155 | 155166 | 155177 | 155188 | 155199 | 155210 | 155221 155232 |
| T4 NC 000866.4         | (154403) | GATTCGCTTTACCAAGATTGGATTACTTATCCAACGACGCCAGAAGCGGTACCACTCGCTGGACACGTACATGGCAGAAAACCAAAAACCTCTTGG   |        |        |        |        |        |        |        |               |
| SARS-CoV-2 NC_045512.2 | (29904)  | -----                                                                                              |        |        |        |        |        |        |        |               |

## SARS-CoV-2 &amp; T4.apr

|                        |          |                                                                                                    |        |        |        |        |        |        |        |              |        |
|------------------------|----------|----------------------------------------------------------------------------------------------------|--------|--------|--------|--------|--------|--------|--------|--------------|--------|
|                        |          |                                                                                                    |        |        |        |        |        |        |        | Section 1618 |        |
|                        | (155233) | 155233                                                                                             | 155243 | 155254 | 155265 | 155276 | 155287 | 155298 | 155309 | 155328       |        |
| T4 NC 000866.4         | (154499) | TCAAGTTTTGTTTCAGGTATTTGACGGAGGTAACCCTCCTCAACCATCTGATATCGGTGCTTTACCATCTGATAATGCTACAATGGGGAATCTTACT  |        |        |        |        |        |        |        |              |        |
| SARS-CoV-2 NC_045512.2 | (29904)  | -----                                                                                              |        |        |        |        |        |        |        |              |        |
|                        |          |                                                                                                    |        |        |        |        |        |        |        | Section 1619 |        |
|                        | (155329) | 155329                                                                                             | 155342 | 155353 | 155364 | 155375 | 155386 | 155397 | 155408 | 155424       |        |
| T4 NC 000866.4         | (154595) | ATTTCGTGATTTCTTGCGAATTGGTAATGTTTCGCATTGTTCTTGACCCAGTGAATAAAACGGTTAAATTTGAATGGGTTGAATAAGAGGTATTATGG |        |        |        |        |        |        |        |              |        |
| SARS-CoV-2 NC_045512.2 | (29904)  | -----                                                                                              |        |        |        |        |        |        |        |              |        |
|                        |          |                                                                                                    |        |        |        |        |        |        |        | Section 1620 |        |
|                        | (155425) | 155425                                                                                             | 155430 | 155441 | 155452 | 155463 | 155474 | 155485 | 155496 | 155507       | 155520 |
| T4 NC 000866.4         | (154691) | AAAAATTTATGGCCGAGTTTGGACAAGGATATGTCCAAACGCCATTTTTATCGGAAAGTAATTCAGTAAGATATAAAATAAGTATAGCGGGTTCTT   |        |        |        |        |        |        |        |              |        |
| SARS-CoV-2 NC_045512.2 | (29904)  | -----                                                                                              |        |        |        |        |        |        |        |              |        |
|                        |          |                                                                                                    |        |        |        |        |        |        |        | Section 1621 |        |
|                        | (155521) | 155521                                                                                             | 155529 | 155540 | 155551 | 155562 | 155573 | 155584 | 155595 | 155616       |        |
| T4 NC 000866.4         | (154787) | GCCCGCTTTCTACAGCAGGACCATCATATGTTAAATTTTCAGGATAATCCTGTAGGAAGTCAAACATTTAGCGCAGGCCTCCATTTAAGAGTTTTTG  |        |        |        |        |        |        |        |              |        |
| SARS-CoV-2 NC_045512.2 | (29904)  | -----                                                                                              |        |        |        |        |        |        |        |              |        |
|                        |          |                                                                                                    |        |        |        |        |        |        |        | Section 1622 |        |
|                        | (155617) | 155617                                                                                             | 155628 | 155639 | 155650 | 155661 | 155672 | 155683 | 155694 | 155712       |        |
| T4 NC 000866.4         | (154883) | ACCCTTCCACCGGAGCATTAGTTGATAGTAAGTCATATGCCTTTTCGACTTCAAATGATACTACATCAGCTGCTTTTGTTAGTTTCATGAATTCTT   |        |        |        |        |        |        |        |              |        |
| SARS-CoV-2 NC_045512.2 | (29904)  | -----                                                                                              |        |        |        |        |        |        |        |              |        |
|                        |          |                                                                                                    |        |        |        |        |        |        |        | Section 1623 |        |
|                        | (155713) | 155713                                                                                             | 155727 | 155738 | 155749 | 155760 | 155771 | 155782 | 155793 | 155808       |        |
| T4 NC 000866.4         | (154979) | TGACGAATAATCGAATTGTTGCTATATTAAGTAGTGAAAGGTTAATTTTCCTCCTGAAGTAGTATCTTGGTTAAGAACCGCCGGAACGTCTGCCT    |        |        |        |        |        |        |        |              |        |
| SARS-CoV-2 NC_045512.2 | (29904)  | -----                                                                                              |        |        |        |        |        |        |        |              |        |
|                        |          |                                                                                                    |        |        |        |        |        |        |        | Section 1624 |        |
|                        | (155809) | 155809                                                                                             | 155815 | 155826 | 155837 | 155848 | 155859 | 155870 | 155881 | 155892       | 155904 |
| T4 NC 000866.4         | (155075) | TTCCATCTGATTCTATATTGTCAAGATTTGACGTATCATATGCTGCTTTTTTATACTTCTTCTAAAAGAGCTATCGCATTAGAGCATGTTAACTGA   |        |        |        |        |        |        |        |              |        |
| SARS-CoV-2 NC_045512.2 | (29904)  | -----                                                                                              |        |        |        |        |        |        |        |              |        |



## SARS-CoV-2 &amp; T4.apr

|                        |          |                                                                                                   |        |        |        |        |        |        |        |               |
|------------------------|----------|---------------------------------------------------------------------------------------------------|--------|--------|--------|--------|--------|--------|--------|---------------|
|                        |          |                                                                                                   |        |        |        |        |        |        |        | Section 1625  |
|                        | (155905) | 155905                                                                                            | 155914 | 155925 | 155936 | 155947 | 155958 | 155969 | 155980 | 156000        |
| T4 NC_000866.4         | (155171) | GTAATAGAAAAAGCACAGATGATTATCAAACATTTTAGATGTTGTATTTGACAGTTTAGAAGATGTAGGGGCTACCGGGTTTCCAAGAGGAACGT   |        |        |        |        |        |        |        |               |
| SARS-CoV-2 NC_045512.2 | (29904)  | -----                                                                                             |        |        |        |        |        |        |        |               |
|                        |          |                                                                                                   |        |        |        |        |        |        |        | Section 1626  |
|                        | (156001) | 156001                                                                                            | 156013 | 156024 | 156035 | 156046 | 156057 | 156068 | 156079 | 156096        |
| T4 NC_000866.4         | (155267) | ATGAAAGTGTGAGCAATTCATGTCGGCAGTTGGTGGAACATAATGACGAAATTGCGAGATTGCCAACTTCAGCTGCTATAAGTAAATTATCTGATT  |        |        |        |        |        |        |        |               |
| SARS-CoV-2 NC_045512.2 | (29904)  | -----                                                                                             |        |        |        |        |        |        |        |               |
|                        |          |                                                                                                   |        |        |        |        |        |        |        | Section 1627  |
|                        | (156097) | 156097                                                                                            | 156112 | 156123 | 156134 | 156145 | 156156 | 156167 | 156178 | 156192        |
| T4 NC_000866.4         | (155363) | ATAATTTAATTCCTGGAGATGTTCTTTATCTTAAAGCTCAGTTATATGCTGATGCTGATTTACTTGCTCTTGGAACACAAATATATCTATCCGTT   |        |        |        |        |        |        |        |               |
| SARS-CoV-2 NC_045512.2 | (29904)  | -----                                                                                             |        |        |        |        |        |        |        |               |
|                        |          |                                                                                                   |        |        |        |        |        |        |        | Section 1628  |
|                        | (156193) | 156193                                                                                            | 156200 | 156211 | 156222 | 156233 | 156244 | 156255 | 156266 | 156277 156288 |
| T4 NC_000866.4         | (155459) | TTTATAATGCATCTAACGGATATATTTCTTCAACACAAGCTGAATTTACTGGGCAAGCTGGGTCATGGGAATTAAAGGAAGATTATGTAGTTGTTT  |        |        |        |        |        |        |        |               |
| SARS-CoV-2 NC_045512.2 | (29904)  | -----                                                                                             |        |        |        |        |        |        |        |               |
|                        |          |                                                                                                   |        |        |        |        |        |        |        | Section 1629  |
|                        | (156289) | 156289                                                                                            | 156299 | 156310 | 156321 | 156332 | 156343 | 156354 | 156365 | 156384        |
| T4 NC_000866.4         | (155555) | CAGAAAACGCAGTAGGATTTACGATATACGCACAGAGAACTGCACAAGCTGGCCAAGGTGGCATGAGAAATTTAAGCTTTTCTGAAGTATCAAGAA  |        |        |        |        |        |        |        |               |
| SARS-CoV-2 NC_045512.2 | (29904)  | -----                                                                                             |        |        |        |        |        |        |        |               |
|                        |          |                                                                                                   |        |        |        |        |        |        |        | Section 1630  |
|                        | (156385) | 156385                                                                                            | 156398 | 156409 | 156420 | 156431 | 156442 | 156453 | 156464 | 156480        |
| T4 NC_000866.4         | (155651) | ATGGCGGCATTTTCGAAACCTGCTGAATTTGGCGTCAATGGTATTCGTGTTAATTATATCTGCGAATCCGCTTCACCCCCGGATATAATGGTACTTC |        |        |        |        |        |        |        |               |
| SARS-CoV-2 NC_045512.2 | (29904)  | -----                                                                                             |        |        |        |        |        |        |        |               |
|                        |          |                                                                                                   |        |        |        |        |        |        |        | Section 1631  |
|                        | (156481) | 156481                                                                                            | 156486 | 156497 | 156508 | 156519 | 156530 | 156541 | 156552 | 156563 156576 |
| T4 NC_000866.4         | (155747) | CTACGCAAGCATCGTCTAAAACTGGTAAAGTGTGTTGGGCAAGAATTTAGAGAAGTTTAAATTGAGGGACCCTTCGGGTTCCCTTTTTCTTTATAAA |        |        |        |        |        |        |        |               |
| SARS-CoV-2 NC_045512.2 | (29904)  | -----                                                                                             |        |        |        |        |        |        |        |               |

## SARS-CoV-2 &amp; T4.apr

|                        |          |                                                                                                    |        |        |        |        |        |        |        |
|------------------------|----------|----------------------------------------------------------------------------------------------------|--------|--------|--------|--------|--------|--------|--------|
|                        |          | Section 1632                                                                                       |        |        |        |        |        |        |        |
|                        | (156577) | 156577                                                                                             | 156585 | 156596 | 156607 | 156618 | 156629 | 156640 | 156651 |
| T4 NC 000866.4         | (155843) | TACTATTCAAATAAAGGGGCATACAATGGCTGATTTAAAAGTAGGTTCAACAACCTGGAGGCTCTGTCATTTGGCATCAAGGAAATTTTCCATTGAA  |        |        |        |        |        |        |        |
| SARS-CoV-2 NC_045512.2 | (29904)  | -----                                                                                              |        |        |        |        |        |        |        |
|                        |          | Section 1633                                                                                       |        |        |        |        |        |        |        |
|                        | (156673) | 156673                                                                                             | 156684 | 156695 | 156706 | 156717 | 156728 | 156739 | 156750 |
| T4 NC 000866.4         | (155939) | TCCAGCCGGTGACGATGTACTCTATAAATCATTTAAAATATATTTCAGAATATAACAAACCACAAGCTGCTGATAACGATTTTCGTTTCTAAAGCTAA |        |        |        |        |        |        |        |
| SARS-CoV-2 NC_045512.2 | (29904)  | -----                                                                                              |        |        |        |        |        |        |        |
|                        |          | Section 1634                                                                                       |        |        |        |        |        |        |        |
|                        | (156769) | 156769                                                                                             | 156783 | 156794 | 156805 | 156816 | 156827 | 156838 | 156849 |
| T4 NC 000866.4         | (156035) | TGGTGGTACTTATGCATCAAAGGTAACATTTAACGCTGGCATTCAAGTCCCATATGCTCCAAACATCATGAGCCCATGCGGGATTATGGGGGTAA    |        |        |        |        |        |        |        |
| SARS-CoV-2 NC_045512.2 | (29904)  | -----                                                                                              |        |        |        |        |        |        |        |
|                        |          | Section 1635                                                                                       |        |        |        |        |        |        |        |
|                        | (156865) | 156865                                                                                             | 156871 | 156882 | 156893 | 156904 | 156915 | 156926 | 156937 |
| T4 NC 000866.4         | (156131) | CGGTGATGGTGCTACTTTTGATAAAGCAAATATCGATATTGTTTCATGGTATGGCGTAGGATTTAAATCGTCATTTGGTTCAACAGGCCGAACGTGT  |        |        |        |        |        |        |        |
| SARS-CoV-2 NC_045512.2 | (29904)  | -----                                                                                              |        |        |        |        |        |        |        |
|                        |          | Section 1636                                                                                       |        |        |        |        |        |        |        |
|                        | (156961) | 156961                                                                                             | 156970 | 156981 | 156992 | 157003 | 157014 | 157025 | 157036 |
| T4 NC 000866.4         | (156227) | TGTAATTAATACACGCAATGGTGATATTAACACAAAAGGTGTTGTGTGTCGGCAGCTGGTCAAGTAAGAAGTGGTGCGGCTGCTCCTATAGCAGCGAA |        |        |        |        |        |        |        |
| SARS-CoV-2 NC_045512.2 | (29904)  | -----                                                                                              |        |        |        |        |        |        |        |
|                        |          | Section 1637                                                                                       |        |        |        |        |        |        |        |
|                        | (157057) | 157057                                                                                             | 157069 | 157080 | 157091 | 157102 | 157113 | 157124 | 157135 |
| T4 NC 000866.4         | (156323) | TGACCTTACTAGAAAGGACTATGTTGATGGAGCAATAAATACTGTTACTGCAAAATGCAAACTCTAGGGTGCTACGGTCTGGTGACACCATGACAGG  |        |        |        |        |        |        |        |
| SARS-CoV-2 NC_045512.2 | (29904)  | -----                                                                                              |        |        |        |        |        |        |        |
|                        |          | Section 1638                                                                                       |        |        |        |        |        |        |        |
|                        | (157153) | 157153                                                                                             | 157168 | 157179 | 157190 | 157201 | 157212 | 157223 | 157234 |
| T4 NC 000866.4         | (156419) | TAATTTAACAGCGCCAAACTTTTTCTCGCAGAATCCTGCATCTCAACCCTCACACGTTCCACGATTTGACCAAATCGTAATTAAGGATTCTGTTCA   |        |        |        |        |        |        |        |
| SARS-CoV-2 NC_045512.2 | (29904)  | -----                                                                                              |        |        |        |        |        |        |        |

## SARS-CoV-2 &amp; T4.apr

|                        |          |                                                                                                    |        |        |        |        |        |        |        |               |
|------------------------|----------|----------------------------------------------------------------------------------------------------|--------|--------|--------|--------|--------|--------|--------|---------------|
|                        |          |                                                                                                    |        |        |        |        |        |        |        | Section 1639  |
|                        | (157249) | 157249                                                                                             | 157256 | 157267 | 157278 | 157289 | 157300 | 157311 | 157322 | 157333 157344 |
| T4 NC 000866.4         | (156515) | AGATTTTCGGCTATTATTAAGAGGACTTATGGCTACTTTAAAACAAATACAATTTAAAAGAAGCAAAATCGCAGGAACACGTCCTGCTGCTTCAGTA  |        |        |        |        |        |        |        |               |
| SARS-CoV-2 NC_045512.2 | (29904)  | -----                                                                                              |        |        |        |        |        |        |        |               |
|                        |          |                                                                                                    |        |        |        |        |        |        |        | Section 1640  |
|                        | (157345) | 157345                                                                                             | 157355 | 157366 | 157377 | 157388 | 157399 | 157410 | 157421 | 157440        |
| T4 NC 000866.4         | (156611) | TTAGCCGAAGGTGAATTGGCTATAAACTTAAAAGATAGAACAATTTTACTAAAGATGATTTCAGGAAATATCATCGATCTAGGTTTTGCTAAAGGC   |        |        |        |        |        |        |        |               |
| SARS-CoV-2 NC_045512.2 | (29904)  | -----                                                                                              |        |        |        |        |        |        |        |               |
|                        |          |                                                                                                    |        |        |        |        |        |        |        | Section 1641  |
|                        | (157441) | 157441                                                                                             | 157454 | 157465 | 157476 | 157487 | 157498 | 157509 | 157520 | 157536        |
| T4 NC 000866.4         | (156707) | GGGCAAGTTGATGGCAACGTTACTATTAACGGACTTTTGAGATTAAATGGCGATTATGTACAAACAGGTGGAATGACTGTAAACGGACCCATTGGT   |        |        |        |        |        |        |        |               |
| SARS-CoV-2 NC_045512.2 | (29904)  | -----                                                                                              |        |        |        |        |        |        |        |               |
|                        |          |                                                                                                    |        |        |        |        |        |        |        | Section 1642  |
|                        | (157537) | 157537                                                                                             | 157542 | 157553 | 157564 | 157575 | 157586 | 157597 | 157608 | 157619 157632 |
| T4 NC 000866.4         | (156803) | TCTACTGATGGCGTCACTGGAAAAATTTTCAGATCTACACAGGGTTCATTTTATGCAAGAGCAACAAACGATACTTCAAATGCCCATTATGGTTT    |        |        |        |        |        |        |        |               |
| SARS-CoV-2 NC_045512.2 | (29904)  | -----                                                                                              |        |        |        |        |        |        |        |               |
|                        |          |                                                                                                    |        |        |        |        |        |        |        | Section 1643  |
|                        | (157633) | 157633                                                                                             | 157641 | 157652 | 157663 | 157674 | 157685 | 157696 | 157707 | 157728        |
| T4 NC 000866.4         | (156899) | GAAATGCGGATGGCACTGAACGTGGCGTTATATATGCTCGCCCTCAAACACAACTGACGGTGAAATACGCCTTAGGGTTAGACAAGGAACAGGA     |        |        |        |        |        |        |        |               |
| SARS-CoV-2 NC_045512.2 | (29904)  | -----                                                                                              |        |        |        |        |        |        |        |               |
|                        |          |                                                                                                    |        |        |        |        |        |        |        | Section 1644  |
|                        | (157729) | 157729                                                                                             | 157740 | 157751 | 157762 | 157773 | 157784 | 157795 | 157806 | 157824        |
| T4 NC 000866.4         | (156995) | AGCACTGCCAACAGTGAATTCTATTTCCGCTCTATAAATGGAGGCGAATTTTCAGGCTAACCGTATTTTAGCATCAGATTTCGTTAGTAACAAAACGC |        |        |        |        |        |        |        |               |
| SARS-CoV-2 NC_045512.2 | (29904)  | -----                                                                                              |        |        |        |        |        |        |        |               |
|                        |          |                                                                                                    |        |        |        |        |        |        |        | Section 1645  |
|                        | (157825) | 157825                                                                                             | 157839 | 157850 | 157861 | 157872 | 157883 | 157894 | 157905 | 157920        |
| T4 NC 000866.4         | (157091) | ATTGCGGTTGATACCGTTATTCATGATGCCAAAGCATTTGGACAATATGATTCTCACTCTTTGGTTAATTATGTTTATCCTGGAACCGGTGAAACA   |        |        |        |        |        |        |        |               |
| SARS-CoV-2 NC_045512.2 | (29904)  | -----                                                                                              |        |        |        |        |        |        |        |               |

## SARS-CoV-2 &amp; T4.apr

|                        |          |                                                                                                    |        |        |        |        |        |        |        |        |        |
|------------------------|----------|----------------------------------------------------------------------------------------------------|--------|--------|--------|--------|--------|--------|--------|--------|--------|
|                        |          | Section 1646                                                                                       |        |        |        |        |        |        |        |        |        |
|                        | (157921) | 157921                                                                                             | 157927 | 157938 | 157949 | 157960 | 157971 | 157982 | 157993 | 158004 | 158016 |
| T4 NC 000866.4         | (157187) | AATGGTGTAACCTATCTTCGTAAAGTTCGCGCTAAGTCCGGTGGTACAATTTATCATGAAATTGTTACTGCACAAACAGGCCTGGCTGATGAAGTT   |        |        |        |        |        |        |        |        |        |
| SARS-CoV-2 NC_045512.2 | (29904)  | -----                                                                                              |        |        |        |        |        |        |        |        |        |
|                        |          | Section 1647                                                                                       |        |        |        |        |        |        |        |        |        |
|                        | (158017) | 158017                                                                                             | 158026 | 158037 | 158048 | 158059 | 158070 | 158081 | 158092 |        | 158112 |
| T4 NC 000866.4         | (157283) | TCTTGGTGGTCTGGTGATACACCAGTATTTAAACTATACGGTATTCGTGACGATGGCAGAATGATTATCCGTAATAGCCTTGCATTAGGTACATTC   |        |        |        |        |        |        |        |        |        |
| SARS-CoV-2 NC_045512.2 | (29904)  | -----                                                                                              |        |        |        |        |        |        |        |        |        |
|                        |          | Section 1648                                                                                       |        |        |        |        |        |        |        |        |        |
|                        | (158113) | 158113                                                                                             | 158125 | 158136 | 158147 | 158158 | 158169 | 158180 | 158191 |        | 158208 |
| T4 NC 000866.4         | (157379) | ACTACAAATTTCCCGTCTAGTGATTATGGCAACGTCGGTGTAATGGGCGATAAGTATCTTGTTCTCGGCGACACTGTAAGTGGCTTGTGCATACAAA  |        |        |        |        |        |        |        |        |        |
| SARS-CoV-2 NC_045512.2 | (29904)  | -----                                                                                              |        |        |        |        |        |        |        |        |        |
|                        |          | Section 1649                                                                                       |        |        |        |        |        |        |        |        |        |
|                        | (158209) | 158209                                                                                             | 158224 | 158235 | 158246 | 158257 | 158268 | 158279 | 158290 |        | 158304 |
| T4 NC 000866.4         | (157475) | AAACTGGTGTATTTGATCTAGTTGGCGGTGGATATTCTGTTGCTTCTATTACTCCTGACAGTTTCCGTAGTACTCGTAAAGGTATATTTGGTCGT    |        |        |        |        |        |        |        |        |        |
| SARS-CoV-2 NC_045512.2 | (29904)  | -----                                                                                              |        |        |        |        |        |        |        |        |        |
|                        |          | Section 1650                                                                                       |        |        |        |        |        |        |        |        |        |
|                        | (158305) | 158305                                                                                             | 158312 | 158323 | 158334 | 158345 | 158356 | 158367 | 158378 | 158389 | 158400 |
| T4 NC 000866.4         | (157571) | TCTGAGGACCAAGGCGCAACTTGGATAATGCCTGGTACAAATGCTGCTCTCTTGCTGTTCAAACACAAGCTGATAATAACAATGCTGGAGACGGA    |        |        |        |        |        |        |        |        |        |
| SARS-CoV-2 NC_045512.2 | (29904)  | -----                                                                                              |        |        |        |        |        |        |        |        |        |
|                        |          | Section 1651                                                                                       |        |        |        |        |        |        |        |        |        |
|                        | (158401) | 158401                                                                                             | 158411 | 158422 | 158433 | 158444 | 158455 | 158466 | 158477 |        | 158496 |
| T4 NC 000866.4         | (157667) | CAAACCCATATCGGGTACAATGCTGGCGGTAAATGAACCACTATTTCCGTGGTACAGGTCAGATGAATATCAATACCCAACAAGGTATGGAAATT    |        |        |        |        |        |        |        |        |        |
| SARS-CoV-2 NC_045512.2 | (29904)  | -----                                                                                              |        |        |        |        |        |        |        |        |        |
|                        |          | Section 1652                                                                                       |        |        |        |        |        |        |        |        |        |
|                        | (158497) | 158497                                                                                             | 158510 | 158521 | 158532 | 158543 | 158554 | 158565 | 158576 |        | 158592 |
| T4 NC 000866.4         | (157763) | AACC CGGGTATTTTGAAATTGGTAACTGGCTCTAATAATGTACAATTTTACGCTGACGGAAGCTATTTCTTCCATTCAACCTATTAAATTAGATAAC |        |        |        |        |        |        |        |        |        |
| SARS-CoV-2 NC_045512.2 | (29904)  | -----                                                                                              |        |        |        |        |        |        |        |        |        |

## SARS-CoV-2 &amp; T4.apr

|                        |          |                                                                                                  |        |        |        |        |        |        |        |        |        |
|------------------------|----------|--------------------------------------------------------------------------------------------------|--------|--------|--------|--------|--------|--------|--------|--------|--------|
|                        |          | Section 1653                                                                                     |        |        |        |        |        |        |        |        |        |
|                        | (158593) | 158593                                                                                           | 158598 | 158609 | 158620 | 158631 | 158642 | 158653 | 158664 | 158675 | 158688 |
| T4 NC_000866.4         | (157859) | GAGATATTTTAACTAAATCTAATAATACTGCGGGTCTTAAATTTGGAGCTCCTAGCCAAGTTGATGGCACAAAGGACTATCCAATGGAACGGTGGT |        |        |        |        |        |        |        |        |        |
| SARS-CoV-2 NC_045512.2 | (29904)  | -----                                                                                            |        |        |        |        |        |        |        |        |        |
|                        |          | Section 1654                                                                                     |        |        |        |        |        |        |        |        |        |
|                        | (158689) | 158689                                                                                           | 158697 | 158708 | 158719 | 158730 | 158741 | 158752 | 158763 | 158784 |        |
| T4 NC_000866.4         | (157955) | ACTCGCGAAGGACAGAATAAAACTATGTGATTATTAAAGCATGGGGTAACTCATTTAATGCCACTGGTGATAGATCTCGCGAAACGGTTTTTCCAA |        |        |        |        |        |        |        |        |        |
| SARS-CoV-2 NC_045512.2 | (29904)  | -----                                                                                            |        |        |        |        |        |        |        |        |        |
|                        |          | Section 1655                                                                                     |        |        |        |        |        |        |        |        |        |
|                        | (158785) | 158785                                                                                           | 158796 | 158807 | 158818 | 158829 | 158840 | 158851 | 158862 | 158880 |        |
| T4 NC_000866.4         | (158051) | GTATCAGATAGTCAAGGATATTATTTTTATGCTCATCGTAAAGCTCCAACCGGCGACGAAACTATTGGACGTATTGAAGCTCAATTTGCTGGGGAT |        |        |        |        |        |        |        |        |        |
| SARS-CoV-2 NC_045512.2 | (29904)  | -----                                                                                            |        |        |        |        |        |        |        |        |        |
|                        |          | Section 1656                                                                                     |        |        |        |        |        |        |        |        |        |
|                        | (158881) | 158881                                                                                           | 158895 | 158906 | 158917 | 158928 | 158939 | 158950 | 158961 | 158976 |        |
| T4 NC_000866.4         | (158147) | GTTTATGCTAAAGGTATTATTGCCAACGGAAATTTTAGAGTTGTTGGGTCAAGCGCTTTAGCCGGCAATGTTACTATGTCTAACGGTTTGTTTGTC |        |        |        |        |        |        |        |        |        |
| SARS-CoV-2 NC_045512.2 | (29904)  | -----                                                                                            |        |        |        |        |        |        |        |        |        |
|                        |          | Section 1657                                                                                     |        |        |        |        |        |        |        |        |        |
|                        | (158977) | 158977                                                                                           | 158983 | 158994 | 159005 | 159016 | 159027 | 159038 | 159049 | 159060 | 159072 |
| T4 NC_000866.4         | (158243) | CAAGGTGGTTCTTCTATTACTGGACAAGTTAAATTTGGCGGAACAGCAAACGCACTGAGAATTTGGAACGCTGAATATGGTGCTATTTTCCGTCGT |        |        |        |        |        |        |        |        |        |
| SARS-CoV-2 NC_045512.2 | (29904)  | -----                                                                                            |        |        |        |        |        |        |        |        |        |
|                        |          | Section 1658                                                                                     |        |        |        |        |        |        |        |        |        |
|                        | (159073) | 159073                                                                                           | 159082 | 159093 | 159104 | 159115 | 159126 | 159137 | 159148 | 159168 |        |
| T4 NC_000866.4         | (158339) | TCGGAAGTAACTTTTATATTATTCCAACCAATCAAAATGAAGGAGAAAGTGGAGACATTACAGCTCTTTGAGACCTGTGAGAATAGGATTAAAC   |        |        |        |        |        |        |        |        |        |
| SARS-CoV-2 NC_045512.2 | (29904)  | -----                                                                                            |        |        |        |        |        |        |        |        |        |
|                        |          | Section 1659                                                                                     |        |        |        |        |        |        |        |        |        |
|                        | (159169) | 159169                                                                                           | 159181 | 159192 | 159203 | 159214 | 159225 | 159236 | 159247 | 159264 |        |
| T4 NC_000866.4         | (158435) | GATGGCATGGTTGGGTTAGGAAGAGATTCTTTTATAGTAGATCAAAATAATGCTTTAACTACGATAAACAGTAACTCTCGCATTAATGCCAATTT  |        |        |        |        |        |        |        |        |        |
| SARS-CoV-2 NC_045512.2 | (29904)  | -----                                                                                            |        |        |        |        |        |        |        |        |        |

## SARS-CoV-2 &amp; T4.apr

|                        |          |                                                                                                      |        |        |        |        |        |        |        |               |
|------------------------|----------|------------------------------------------------------------------------------------------------------|--------|--------|--------|--------|--------|--------|--------|---------------|
|                        |          |                                                                                                      |        |        |        |        |        |        |        | Section 1660  |
|                        | (159265) | 159265                                                                                               | 159280 | 159291 | 159302 | 159313 | 159324 | 159335 | 159346 | 159360        |
| T4 NC_000866.4         | (158531) | AGAATGCAATTGGGGCAGTCGGCATAACATTGATGCAGAATGTACTGATGCTGTTTCGCCCCGGCGGGTGCAGGTTTCATTTGCTTCCCAGAATAATGAA |        |        |        |        |        |        |        |               |
| SARS-CoV-2 NC_045512.2 | (29904)  | -----                                                                                                |        |        |        |        |        |        |        |               |
|                        |          |                                                                                                      |        |        |        |        |        |        |        | Section 1661  |
|                        | (159361) | 159361                                                                                               | 159368 | 159379 | 159390 | 159401 | 159412 | 159423 | 159434 | 159445 159456 |
| T4 NC_000866.4         | (158627) | GACGTCCGTGCGCCGTTCTATATGAATATTGATAGAACTGATGCTAGTGCATATGTTTCTATTTTGAACAACGTTATGTTCAAGGCAATGGCTGC      |        |        |        |        |        |        |        |               |
| SARS-CoV-2 NC_045512.2 | (29904)  | -----                                                                                                |        |        |        |        |        |        |        |               |
|                        |          |                                                                                                      |        |        |        |        |        |        |        | Section 1662  |
|                        | (159457) | 159457                                                                                               | 159467 | 159478 | 159489 | 159500 | 159511 | 159522 | 159533 | 159552        |
| T4 NC_000866.4         | (158723) | TATTCATTAGGGACTTTAATTAATAATGGTAATTTCCGAGTTCATTACCATGGCGGCGGAGATAACGGTTCACAGGTCCACAGACTGCTGATTTT      |        |        |        |        |        |        |        |               |
| SARS-CoV-2 NC_045512.2 | (29904)  | -----                                                                                                |        |        |        |        |        |        |        |               |
|                        |          |                                                                                                      |        |        |        |        |        |        |        | Section 1663  |
|                        | (159553) | 159553                                                                                               | 159566 | 159577 | 159588 | 159599 | 159610 | 159621 | 159632 | 159648        |
| T4 NC_000866.4         | (158819) | GGATGGGAATTTATTAAAAACGGTGATTTTATTTTACCTCGCGATTTAATAGCAGGCAAAGTCAGATTTGATAGAACTGGTAATATCACTGGTGGT     |        |        |        |        |        |        |        |               |
| SARS-CoV-2 NC_045512.2 | (29904)  | -----                                                                                                |        |        |        |        |        |        |        |               |
|                        |          |                                                                                                      |        |        |        |        |        |        |        | Section 1664  |
|                        | (159649) | 159649                                                                                               | 159654 | 159665 | 159676 | 159687 | 159698 | 159709 | 159720 | 159731 159744 |
| T4 NC_000866.4         | (158915) | TCTGGTAATTTTGCTAACTTAAACAGTACAATTGAATCACTTAAAACTGATATCATGTGCGAGTTACCCAATTGGTGCTCCGATTCTTGCCGAGT      |        |        |        |        |        |        |        |               |
| SARS-CoV-2 NC_045512.2 | (29904)  | -----                                                                                                |        |        |        |        |        |        |        |               |
|                        |          |                                                                                                      |        |        |        |        |        |        |        | Section 1665  |
|                        | (159745) | 159745                                                                                               | 159753 | 159764 | 159775 | 159786 | 159797 | 159808 | 159819 | 159840        |
| T4 NC_000866.4         | (159011) | GATTCAGTTCCTGCTGGATTTGCTTTGATGGAAGGTCAGACCTTTGATAAGTCCGCATATCCAAAGTTAGCTGTTGCATATCCTAGCGGTGTTATT     |        |        |        |        |        |        |        |               |
| SARS-CoV-2 NC_045512.2 | (29904)  | -----                                                                                                |        |        |        |        |        |        |        |               |
|                        |          |                                                                                                      |        |        |        |        |        |        |        | Section 1666  |
|                        | (159841) | 159841                                                                                               | 159852 | 159863 | 159874 | 159885 | 159896 | 159907 | 159918 | 159936        |
| T4 NC_000866.4         | (159107) | CCAGATATGCGCGGGCAAACCTATCAAGGGTAAACCAAGTGGTCGTGCTGTTTTGAGCGCTGAGGCAGATGGTGTTAAGGCTCATAGCCATAGTGCA    |        |        |        |        |        |        |        |               |
| SARS-CoV-2 NC_045512.2 | (29904)  | -----                                                                                                |        |        |        |        |        |        |        |               |

## SARS-CoV-2 &amp; T4.apr

|                        |          |                                                                                                   |        |        |        |        |        |        |        |               |
|------------------------|----------|---------------------------------------------------------------------------------------------------|--------|--------|--------|--------|--------|--------|--------|---------------|
|                        |          |                                                                                                   |        |        |        |        |        |        |        | Section 1667  |
|                        | (159937) | 159937                                                                                            | 159951 | 159962 | 159973 | 159984 | 159995 | 160006 | 160017 | 160032        |
| T4 NC_000866.4         | (159203) | TCGGCTTCAAGTACTGACTTAGGTACTAAAACCACATCAAGCTTTGACTATGGTACGAAGGGAACCTAACAGTACGGGTGGACACACTCACTCTGGT |        |        |        |        |        |        |        |               |
| SARS-CoV-2 NC_045512.2 | (29904)  | -----                                                                                             |        |        |        |        |        |        |        |               |
|                        |          |                                                                                                   |        |        |        |        |        |        |        | Section 1668  |
|                        | (160033) | 160033                                                                                            | 160039 | 160050 | 160061 | 160072 | 160083 | 160094 | 160105 | 160116 160128 |
| T4 NC_000866.4         | (159299) | AGTGGTTCTACTAGCACAAATGGTGAGCACAGCCACTACATCGAGGCATGGAATGGTACTGGTGTAGGTGGTAATAAGATGTCATCATATGCCATA  |        |        |        |        |        |        |        |               |
| SARS-CoV-2 NC_045512.2 | (29904)  | -----                                                                                             |        |        |        |        |        |        |        |               |
|                        |          |                                                                                                   |        |        |        |        |        |        |        | Section 1669  |
|                        | (160129) | 160129                                                                                            | 160138 | 160149 | 160160 | 160171 | 160182 | 160193 | 160204 | 160224        |
| T4 NC_000866.4         | (159395) | TCATACAGGGCGGGTGGGAGTAACACTAATGCAGCAGGGAACCCACAGTCACACTTTCTCTTTTGGGACTAGCAGTGCTGGCGACCATTCCCACTCT |        |        |        |        |        |        |        |               |
| SARS-CoV-2 NC_045512.2 | (29904)  | -----                                                                                             |        |        |        |        |        |        |        |               |
|                        |          |                                                                                                   |        |        |        |        |        |        |        | Section 1670  |
|                        | (160225) | 160225                                                                                            | 160237 | 160248 | 160259 | 160270 | 160281 | 160292 | 160303 | 160320        |
| T4 NC_000866.4         | (159491) | GTAGGTATTGGTGCTCATACCCACACGGTAGCAATTGGATCACATGGTCATACTATCACTGTAAATAGTACAGGTAATACAGAAAACACGGTTAAA  |        |        |        |        |        |        |        |               |
| SARS-CoV-2 NC_045512.2 | (29904)  | -----                                                                                             |        |        |        |        |        |        |        |               |
|                        |          |                                                                                                   |        |        |        |        |        |        |        | Section 1671  |
|                        | (160321) | 160321                                                                                            | 160336 | 160347 | 160358 | 160369 | 160380 | 160391 | 160402 | 160416        |
| T4 NC_000866.4         | (159587) | AACATTGCTTTTAACTATATCGTTCGTTTAGCATAAGGAGAGGGGCTTCGGCCCTTCTAAATATGAAAATATATCATTATTATTTTGACACTAAAG  |        |        |        |        |        |        |        |               |
| SARS-CoV-2 NC_045512.2 | (29904)  | -----                                                                                             |        |        |        |        |        |        |        |               |
|                        |          |                                                                                                   |        |        |        |        |        |        |        | Section 1672  |
|                        | (160417) | 160417                                                                                            | 160424 | 160435 | 160446 | 160457 | 160468 | 160479 | 160490 | 160501 160512 |
| T4 NC_000866.4         | (159683) | AATTTTACAAAGAAGAAAATTACAAACCGGTTAAAGGCCTCGGTCTTCCTGCTCATTCAACAATTAACAAACCTTTAGAACCTAAAGAAGGATACG  |        |        |        |        |        |        |        |               |
| SARS-CoV-2 NC_045512.2 | (29904)  | -----                                                                                             |        |        |        |        |        |        |        |               |
|                        |          |                                                                                                   |        |        |        |        |        |        |        | Section 1673  |
|                        | (160513) | 160513                                                                                            | 160523 | 160534 | 160545 | 160556 | 160567 | 160578 | 160589 | 160608        |
| T4 NC_000866.4         | (159779) | CGGTTGTATTTGATGAACGTACTCAGGATTGGATTATGAAGAAGACCATCGCGGAAAACGCGCATGGACTTTTAATAAAGAAGAAATTTTATAA    |        |        |        |        |        |        |        |               |
| SARS-CoV-2 NC_045512.2 | (29904)  | -----                                                                                             |        |        |        |        |        |        |        |               |

## SARS-CoV-2 &amp; T4.apr

|                        |          |                                                                                                     |        |        |        |        |        |        |        |               |
|------------------------|----------|-----------------------------------------------------------------------------------------------------|--------|--------|--------|--------|--------|--------|--------|---------------|
|                        |          |                                                                                                     |        |        |        |        |        |        |        | Section 1674  |
|                        | (160609) | 160609                                                                                              | 160622 | 160633 | 160644 | 160655 | 160666 | 160677 | 160688 | 160704        |
| T4 NC_000866.4         | (159875) | GTGACATTGGAAGCCCGGTTGGTATAACTTTTCGATGAGCCCGGCGAATTTGATATATGGACTGATGACGGTTGGAAAGAAGACGAAACATATAAGC   |        |        |        |        |        |        |        |               |
| SARS-CoV-2 NC_045512.2 | (29904)  | -----                                                                                               |        |        |        |        |        |        |        |               |
|                        |          |                                                                                                     |        |        |        |        |        |        |        | Section 1675  |
|                        | (160705) | 160705                                                                                              | 160710 | 160721 | 160732 | 160743 | 160754 | 160765 | 160776 | 160787 160800 |
| T4 NC_000866.4         | (159971) | GAGTTTTTAATTTCGTAATAGAAAAATTGAAGAATTATATAAAGAGTTCCAAGTTTTAAATAATATGATTGAAGCTTCTGTGCGCCAATAAAAAGGAAA |        |        |        |        |        |        |        |               |
| SARS-CoV-2 NC_045512.2 | (29904)  | -----                                                                                               |        |        |        |        |        |        |        |               |
|                        |          |                                                                                                     |        |        |        |        |        |        |        | Section 1676  |
|                        | (160801) | 160801                                                                                              | 160809 | 160820 | 160831 | 160842 | 160853 | 160864 | 160875 | 160896        |
| T4 NC_000866.4         | (160067) | AATTCTATTATAAAAAACCTTAAGCGGTTCTTTGCTCTTTTAGAAAAGCATGAGCATTTAGGTGGTGAATTCCCTTCATGGCCTGAAAAAGAACAGA   |        |        |        |        |        |        |        |               |
| SARS-CoV-2 NC_045512.2 | (29904)  | -----                                                                                               |        |        |        |        |        |        |        |               |
|                        |          |                                                                                                     |        |        |        |        |        |        |        | Section 1677  |
|                        | (160897) | 160897                                                                                              | 160908 | 160919 | 160930 | 160941 | 160952 | 160963 | 160974 | 160992        |
| T4 NC_000866.4         | (160163) | AGCCTTGGTATAAGCGTTTATTCAAGCATTACGTATAAATATCTTAAAAGGAGGGTCTATGGCAGCACCTAGAATATCATTTTCGCCCTCTGATAT    |        |        |        |        |        |        |        |               |
| SARS-CoV-2 NC_045512.2 | (29904)  | -----                                                                                               |        |        |        |        |        |        |        |               |
|                        |          |                                                                                                     |        |        |        |        |        |        |        | Section 1678  |
|                        | (160993) | 160993                                                                                              | 161007 | 161018 | 161029 | 161040 | 161051 | 161062 | 161073 | 161088        |
| T4 NC_000866.4         | (160259) | TCTATTTGGTGTTCAGATCGCTTGTTCAAAGATAACGCTACCGGGAAGGTTCTTGCTTCCCGGGTAGCTGTCGTAATTCTTTTGTTTATAATGGC     |        |        |        |        |        |        |        |               |
| SARS-CoV-2 NC_045512.2 | (29904)  | -----                                                                                               |        |        |        |        |        |        |        |               |
|                        |          |                                                                                                     |        |        |        |        |        |        |        | Section 1679  |
|                        | (161089) | 161089                                                                                              | 161095 | 161106 | 161117 | 161128 | 161139 | 161150 | 161161 | 161172 161184 |
| T4 NC_000866.4         | (160355) | GATTGTTTGGTATAGGGGAGATAGTTTCTTTGAGTACTATAAGCAATCAAAGTATGAAACATACAGTGAAATTATTGAAAAGGAAAGAACTGCACG    |        |        |        |        |        |        |        |               |
| SARS-CoV-2 NC_045512.2 | (29904)  | -----                                                                                               |        |        |        |        |        |        |        |               |
|                        |          |                                                                                                     |        |        |        |        |        |        |        | Section 1680  |
|                        | (161185) | 161185                                                                                              | 161194 | 161205 | 161216 | 161227 | 161238 | 161249 | 161260 | 161280        |
| T4 NC_000866.4         | (160451) | CTTTGAATCTGTGCGCCCTGGAACAACTCCAGATAGTTCATATATCATCTGAGGCAGACTTTAGTGCGGTGTATTCTTTCCGCCCTAAAACTTAAA    |        |        |        |        |        |        |        |               |
| SARS-CoV-2 NC_045512.2 | (29904)  | -----                                                                                               |        |        |        |        |        |        |        |               |



## SARS-CoV-2 &amp; T4.apr

|                        |          |                                                                                                   |        |        |        |        |        |        |        |               |
|------------------------|----------|---------------------------------------------------------------------------------------------------|--------|--------|--------|--------|--------|--------|--------|---------------|
| Section 1681           |          |                                                                                                   |        |        |        |        |        |        |        |               |
|                        | (161281) | 161281                                                                                            | 161293 | 161304 | 161315 | 161326 | 161337 | 161348 | 161359 | 161376        |
| T4 NC 000866.4         | (160547) | CTATTTTGTGATATTATAGCATACGAAGGAAAATTACCTTCAACAATAAGTGAAAAATCACTTGGAGGATATCCTGTTGATAAACTATGGATGA    |        |        |        |        |        |        |        |               |
| SARS-CoV-2 NC_045512.2 | (29904)  | -----                                                                                             |        |        |        |        |        |        |        |               |
| Section 1682           |          |                                                                                                   |        |        |        |        |        |        |        |               |
|                        | (161377) | 161377                                                                                            | 161392 | 161403 | 161414 | 161425 | 161436 | 161447 | 161458 | 161472        |
| T4 NC 000866.4         | (160643) | ATATACAGTTCATTTAAATGGACGTCATTATTATTCCAACCTCAAAATTTGCTTTTTTACCAACTAAAAAGCCTACTCCCGAAATAAACTACATGTA |        |        |        |        |        |        |        |               |
| SARS-CoV-2 NC_045512.2 | (29904)  | -----                                                                                             |        |        |        |        |        |        |        |               |
| Section 1683           |          |                                                                                                   |        |        |        |        |        |        |        |               |
|                        | (161473) | 161473                                                                                            | 161480 | 161491 | 161502 | 161513 | 161524 | 161535 | 161546 | 161557 161568 |
| T4 NC 000866.4         | (160739) | CAGTTGTCCATATTTTAAATTTGGATAATATCTATGCTGGAACGATAACCATGTACTGGTATAGAAATGATCATATAAGTAATGACCGCCTTGAATC |        |        |        |        |        |        |        |               |
| SARS-CoV-2 NC_045512.2 | (29904)  | -----                                                                                             |        |        |        |        |        |        |        |               |
| Section 1684           |          |                                                                                                   |        |        |        |        |        |        |        |               |
|                        | (161569) | 161569                                                                                            | 161579 | 161590 | 161601 | 161612 | 161623 | 161634 | 161645 | 161664        |
| T4 NC 000866.4         | (160835) | AATATGTGCTCAGGCGGCCAGAATATTAGGAAGGGCTAAATAATTATTTGTTTCGTATACATCTCTAGATATCGATATACACCCTCAAACCCCTCGT |        |        |        |        |        |        |        |               |
| SARS-CoV-2 NC_045512.2 | (29904)  | -----                                                                                             |        |        |        |        |        |        |        |               |
| Section 1685           |          |                                                                                                   |        |        |        |        |        |        |        |               |
|                        | (161665) | 161665                                                                                            | 161678 | 161689 | 161700 | 161711 | 161722 | 161733 | 161744 | 161760        |
| T4 NC 000866.4         | (160931) | TGAATTCGTCGATGAGGGTTTTCTTATCTTCTTGAGTTAATTCAGAAACAATTTTACGGAATGAATTTTGATTTAACTTTCTACCTTCATGCGTTA  |        |        |        |        |        |        |        |               |
| SARS-CoV-2 NC_045512.2 | (29904)  | -----                                                                                             |        |        |        |        |        |        |        |               |
| Section 1686           |          |                                                                                                   |        |        |        |        |        |        |        |               |
|                        | (161761) | 161761                                                                                            | 161766 | 161777 | 161788 | 161799 | 161810 | 161821 | 161832 | 161843 161856 |
| T4 NC 000866.4         | (161027) | CTCCAATCTCATTTAGAAATGCAATAAAATTAGCACGATTCTCAACAATATCTTCTCTGGAAAATTTAATCAAATAGATGCAACAGTAATAATTT   |        |        |        |        |        |        |        |               |
| SARS-CoV-2 NC_045512.2 | (29904)  | -----                                                                                             |        |        |        |        |        |        |        |               |
| Section 1687           |          |                                                                                                   |        |        |        |        |        |        |        |               |
|                        | (161857) | 161857                                                                                            | 161865 | 161876 | 161887 | 161898 | 161909 | 161920 | 161931 | 161952        |
| T4 NC 000866.4         | (161123) | CACGAACTGTATCAATGTTTTATTCACTTAACCTATACCACTCAATTAGTTGACTTTGTTATAATATCATCAGACGCTTGATTTGTAACTGGTCTG  |        |        |        |        |        |        |        |               |
| SARS-CoV-2 NC_045512.2 | (29904)  | -----                                                                                             |        |        |        |        |        |        |        |               |

## SARS-CoV-2 &amp; T4.apr

|                        |          |                                                                                                  |        |        |        |        |        |        |        |               |
|------------------------|----------|--------------------------------------------------------------------------------------------------|--------|--------|--------|--------|--------|--------|--------|---------------|
|                        |          |                                                                                                  |        |        |        |        |        |        |        | Section 1688  |
|                        | (161953) | 161953                                                                                           | 161964 | 161975 | 161986 | 161997 | 162008 | 162019 | 162030 | 162048        |
| T4 NC 000866.4         | (161219) | TGTAATTTTCTTCAAAAATTTTCTACGAATTCCTTGAACGATTACGTTCTGAGCTACATTATGCTCGATTACCTTTTCAAGATTATGACTCA     |        |        |        |        |        |        |        |               |
| SARS-CoV-2 NC_045512.2 | (29904)  | -----                                                                                            |        |        |        |        |        |        |        |               |
|                        |          |                                                                                                  |        |        |        |        |        |        |        | Section 1689  |
|                        | (162049) | 162049                                                                                           | 162063 | 162074 | 162085 | 162096 | 162107 | 162118 | 162129 | 162144        |
| T4 NC 000866.4         | (161315) | TTCGAAATAATCTTCAATTCATAATCATGGACATAAATCATTATAGTTTTTAATACATCATCAATATTTTTCTGGAGCTGGAATTACGTAAAA    |        |        |        |        |        |        |        |               |
| SARS-CoV-2 NC_045512.2 | (29904)  | -----                                                                                            |        |        |        |        |        |        |        |               |
|                        |          |                                                                                                  |        |        |        |        |        |        |        | Section 1690  |
|                        | (162145) | 162145                                                                                           | 162151 | 162162 | 162173 | 162184 | 162195 | 162206 | 162217 | 162228 162240 |
| T4 NC 000866.4         | (161411) | ATACCCTGCTTTTGAGAGGTCCTTATAAGTTCCAATCAAGAAATCATTATTCTCAAGATGTAACCTCTCAACTAATTCATTGACAATTGAATGGTA |        |        |        |        |        |        |        |               |
| SARS-CoV-2 NC_045512.2 | (29904)  | -----                                                                                            |        |        |        |        |        |        |        |               |
|                        |          |                                                                                                  |        |        |        |        |        |        |        | Section 1691  |
|                        | (162241) | 162241                                                                                           | 162250 | 162261 | 162272 | 162283 | 162294 | 162305 | 162316 | 162336        |
| T4 NC 000866.4         | (161507) | TAGGTTTGGCAGAACTTATATAGCTTTTCTAGAATATCAATTTTGAATGTATATTGAACCACGGACTGAGAATCAATAATCATAGACCTTCCCCT  |        |        |        |        |        |        |        |               |
| SARS-CoV-2 NC_045512.2 | (29904)  | -----                                                                                            |        |        |        |        |        |        |        |               |
|                        |          |                                                                                                  |        |        |        |        |        |        |        | Section 1692  |
|                        | (162337) | 162337                                                                                           | 162349 | 162360 | 162371 | 162382 | 162393 | 162404 | 162415 | 162432        |
| T4 NC 000866.4         | (161603) | TATGTTTCTGTTTGCATTAGATTCTTTAAACGCTTTCTTCTTATCCTTATGAACAGAAGCTTTATTAAAATTATGCTTTGCGACTAAATTGTTCA  |        |        |        |        |        |        |        |               |
| SARS-CoV-2 NC_045512.2 | (29904)  | -----                                                                                            |        |        |        |        |        |        |        |               |
|                        |          |                                                                                                  |        |        |        |        |        |        |        | Section 1693  |
|                        | (162433) | 162433                                                                                           | 162448 | 162459 | 162470 | 162481 | 162492 | 162503 | 162514 | 162528        |
| T4 NC 000866.4         | (161699) | TAGTGCTGAATTACCTCTCTTAAACATTTGCATGTGAATGAAAACCTTTTAGCTACACCACATTCAAATATATGTTCTCTTAAATCGCGTGTATCG |        |        |        |        |        |        |        |               |
| SARS-CoV-2 NC_045512.2 | (29904)  | -----                                                                                            |        |        |        |        |        |        |        |               |
|                        |          |                                                                                                  |        |        |        |        |        |        |        | Section 1694  |
|                        | (162529) | 162529                                                                                           | 162536 | 162547 | 162558 | 162569 | 162580 | 162591 | 162602 | 162613 162624 |
| T4 NC 000866.4         | (161795) | GTATATCCCATCTCAACAATAAAATGCCGTATTAGATTTTTATCTTTATCGTTTAGAGAATTAAATAATCAGATTTTGAATTAATTTCCCTGGCC  |        |        |        |        |        |        |        |               |
| SARS-CoV-2 NC_045512.2 | (29904)  | -----                                                                                            |        |        |        |        |        |        |        |               |

## SARS-CoV-2 &amp; T4.apr

|                        |          |                                                                                                      |        |        |        |        |        |        |        |              |        |
|------------------------|----------|------------------------------------------------------------------------------------------------------|--------|--------|--------|--------|--------|--------|--------|--------------|--------|
|                        |          |                                                                                                      |        |        |        |        |        |        |        | Section 1695 |        |
|                        | (162625) | 162625                                                                                               | 162635 | 162646 | 162657 | 162668 | 162679 | 162690 | 162701 | 162720       |        |
| T4 NC 000866.4         | (161891) | AAATTGAATCACCTTCAGTTGACGTTTTAACTCTTTTATCATCTCTTCGTTTCATCGCAATATAAAGATCGCGTAGAGCAGGTTTTAGCATTCCATT    |        |        |        |        |        |        |        |              |        |
| SARS-CoV-2 NC_045512.2 | (29904)  | -----                                                                                                |        |        |        |        |        |        |        |              |        |
|                        |          |                                                                                                      |        |        |        |        |        |        |        | Section 1696 |        |
|                        | (162721) | 162721                                                                                               | 162734 | 162745 | 162756 | 162767 | 162778 | 162789 | 162800 | 162816       |        |
| T4 NC 000866.4         | (161987) | TACTGGAGAAGCTAAATGGACATACATAATCTTTTCCTACGAGCTTTTGTAGTGAATTCCATATCACAGAAGCTGAAATCCCGGCTCATTGGTATAAAAT |        |        |        |        |        |        |        |              |        |
| SARS-CoV-2 NC_045512.2 | (29904)  | -----                                                                                                |        |        |        |        |        |        |        |              |        |
|                        |          |                                                                                                      |        |        |        |        |        |        |        | Section 1697 |        |
|                        | (162817) | 162817                                                                                               | 162822 | 162833 | 162844 | 162855 | 162866 | 162877 | 162888 | 162899       | 162912 |
| T4 NC 000866.4         | (162083) | TCCCCAATTAGTTGACATCATTTTATTGGCATATTCCAGTGCCTGGATTGTGATTTCATAATTCCATCAATTTGAAACTTTTTAATATTTCATTAGTAA  |        |        |        |        |        |        |        |              |        |
| SARS-CoV-2 NC_045512.2 | (29904)  | -----                                                                                                |        |        |        |        |        |        |        |              |        |
|                        |          |                                                                                                      |        |        |        |        |        |        |        | Section 1698 |        |
|                        | (162913) | 162913                                                                                               | 162921 | 162932 | 162943 | 162954 | 162965 | 162976 | 162987 | 163008       |        |
| T4 NC 000866.4         | (162179) | AGGTCCTCAGAGTAAAGTTCTTTTTCACTACCACGTTCAATACTTACTTGTCCAGCGTAAGTTGCAATAATCATTGCTTCTTCACGTGTCCAATAA     |        |        |        |        |        |        |        |              |        |
| SARS-CoV-2 NC_045512.2 | (29904)  | -----                                                                                                |        |        |        |        |        |        |        |              |        |
|                        |          |                                                                                                      |        |        |        |        |        |        |        | Section 1699 |        |
|                        | (163009) | 163009                                                                                               | 163020 | 163031 | 163042 | 163053 | 163064 | 163075 | 163086 | 163104       |        |
| T4 NC 000866.4         | (162275) | TTACTATATTGGTCAATAAAACCCTTGGTCATCATCACAACTTGCTGAGTAACTAATTGAGGTTTAACTACATCTAAAACCTTCTGCCATATCTTTA    |        |        |        |        |        |        |        |              |        |
| SARS-CoV-2 NC_045512.2 | (29904)  | -----                                                                                                |        |        |        |        |        |        |        |              |        |
|                        |          |                                                                                                      |        |        |        |        |        |        |        | Section 1700 |        |
|                        | (163105) | 163105                                                                                               | 163119 | 163130 | 163141 | 163152 | 163163 | 163174 | 163185 | 163200       |        |
| T4 NC 000866.4         | (162371) | GAATAATGACGAGCACCTGGAATAATAAGAGTTTCGTCCATCTTTTAATTTAAACGTTTGGCTGCGCAAACAATTCGTCGTTGATACTTTTGGTTT     |        |        |        |        |        |        |        |              |        |
| SARS-CoV-2 NC_045512.2 | (29904)  | -----                                                                                                |        |        |        |        |        |        |        |              |        |
|                        |          |                                                                                                      |        |        |        |        |        |        |        | Section 1701 |        |
|                        | (163201) | 163201                                                                                               | 163207 | 163218 | 163229 | 163240 | 163251 | 163262 | 163273 | 163284       | 163296 |
| T4 NC 000866.4         | (162467) | TCATCCCAGTACGCAGTCTGCCAACAGATTTTCAGGAAGTCTTTTCAGAAATATCTTCTTCTGTGCATTTATAACCATGCGCTTTAAATTTTCAACA    |        |        |        |        |        |        |        |              |        |
| SARS-CoV-2 NC_045512.2 | (29904)  | -----                                                                                                |        |        |        |        |        |        |        |              |        |

## SARS-CoV-2 &amp; T4.apr

|                        |          |                                                                                                   |        |        |        |        |        |        |        |               |
|------------------------|----------|---------------------------------------------------------------------------------------------------|--------|--------|--------|--------|--------|--------|--------|---------------|
|                        |          |                                                                                                   |        |        |        |        |        |        |        | Section 1702  |
|                        | (163297) | 163297                                                                                            | 163306 | 163317 | 163328 | 163339 | 163350 | 163361 | 163372 | 163392        |
| T4 NC 000866.4         | (162563) | AGACTTTTCTGGAGTTTCACGAGATAAAGGAACATTCAGCATTTTAAACGATTGATAAATGGGTTTCATTTAAACCATCCTTTAATACGCTGCCACA |        |        |        |        |        |        |        |               |
| SARS-CoV-2 NC_045512.2 | (29904)  | -----                                                                                             |        |        |        |        |        |        |        |               |
|                        |          |                                                                                                   |        |        |        |        |        |        |        | Section 1703  |
|                        | (163393) | 163393                                                                                            | 163405 | 163416 | 163427 | 163438 | 163449 | 163460 | 163471 | 163488        |
| T4 NC 000866.4         | (162659) | AAGTTTTCTGTTGAGCTTTGTTGACGCCAATTGAGCGAATAACCGTTGAGATTCTTGAATTCTTTATAATCAGCAAGGTAAATTTTCGTAAGCTG   |        |        |        |        |        |        |        |               |
| SARS-CoV-2 NC_045512.2 | (29904)  | -----                                                                                             |        |        |        |        |        |        |        |               |
|                        |          |                                                                                                   |        |        |        |        |        |        |        | Section 1704  |
|                        | (163489) | 163489                                                                                            | 163504 | 163515 | 163526 | 163537 | 163548 | 163559 | 163570 | 163584        |
| T4 NC 000866.4         | (162755) | CATCCGTAAATGAACCTTATCGCTGCCATAAAATTATTGCGAATACCTACTGGAGCATCTTTACTTTTACGAATGATCATGTATTTACCAGTCTTAA |        |        |        |        |        |        |        |               |
| SARS-CoV-2 NC_045512.2 | (29904)  | -----                                                                                             |        |        |        |        |        |        |        |               |
|                        |          |                                                                                                   |        |        |        |        |        |        |        | Section 1705  |
|                        | (163585) | 163585                                                                                            | 163592 | 163603 | 163614 | 163625 | 163636 | 163647 | 163658 | 163669 163680 |
| T4 NC 000866.4         | (162851) | TCTTTACGATAGTTCCAAGATAAGCTCCATGGTACCAAATATCCCAACCCTCTTGAGTAGGTTCTGCGCAACGACGAAGTTCATTGACAATTTCTA  |        |        |        |        |        |        |        |               |
| SARS-CoV-2 NC_045512.2 | (29904)  | -----                                                                                             |        |        |        |        |        |        |        |               |
|                        |          |                                                                                                   |        |        |        |        |        |        |        | Section 1706  |
|                        | (163681) | 163681                                                                                            | 163691 | 163702 | 163713 | 163724 | 163735 | 163746 | 163757 | 163776        |
| T4 NC 000866.4         | (162947) | ACTTGTTTATTATTTATTCCTCACAGTTCAGATGCTACAGTGATTACAGCTTCAATGTTTTCTGCCGAGCGTTTAATGTCAAGATACACATTACCG  |        |        |        |        |        |        |        |               |
| SARS-CoV-2 NC_045512.2 | (29904)  | -----                                                                                             |        |        |        |        |        |        |        |               |
|                        |          |                                                                                                   |        |        |        |        |        |        |        | Section 1707  |
|                        | (163777) | 163777                                                                                            | 163790 | 163801 | 163812 | 163823 | 163834 | 163845 | 163856 | 163872        |
| T4 NC 000866.4         | (163043) | TTTTTAGCGATTTTACATGACATTCCGATGTCAGTAAATTTCTGAATATGATGTTCCATCATTTTGTATCCAAAAATTCGCATATTTCCATTGTTA  |        |        |        |        |        |        |        |               |
| SARS-CoV-2 NC_045512.2 | (29904)  | -----                                                                                             |        |        |        |        |        |        |        |               |
|                        |          |                                                                                                   |        |        |        |        |        |        |        | Section 1708  |
|                        | (163873) | 163873                                                                                            | 163878 | 163889 | 163900 | 163911 | 163922 | 163933 | 163944 | 163955 163968 |
| T4 NC 000866.4         | (163139) | TTAATTTCAAAATTACGAATTCGGTTAGTGCGTTTTTCTAAAATAGCAAGATAATTACTACGATAAATTTCAACCTTTTAAAGAACAAATCCATT   |        |        |        |        |        |        |        |               |
| SARS-CoV-2 NC_045512.2 | (29904)  | -----                                                                                             |        |        |        |        |        |        |        |               |

## SARS-CoV-2 &amp; T4.apr

|                        |          |                                                                                                     |        |        |        |        |        |        |        |               |
|------------------------|----------|-----------------------------------------------------------------------------------------------------|--------|--------|--------|--------|--------|--------|--------|---------------|
|                        |          |                                                                                                     |        |        |        |        |        |        |        | Section 1709  |
|                        | (163969) | 163969                                                                                              | 163977 | 163988 | 163999 | 164010 | 164021 | 164032 | 164043 | 164064        |
| T4 NC 000866.4         | (163235) | TTATCTAAAAGTTTAAACATGAGGTCCTTATCTTCTTCCATATCGGAAGTAATCTCGCGAGCTTTACGAGTTGCTCGTTTTTTCAGCAGTTCCGGA    |        |        |        |        |        |        |        |               |
| SARS-CoV-2 NC_045512.2 | (29904)  | -----                                                                                               |        |        |        |        |        |        |        |               |
|                        |          |                                                                                                     |        |        |        |        |        |        |        | Section 1710  |
|                        | (164065) | 164065                                                                                              | 164076 | 164087 | 164098 | 164109 | 164120 | 164131 | 164142 | 164160        |
| T4 NC 000866.4         | (163331) | GCATTTTCTCTGTGCATATAAAGTTGCTGCATTTGAAATAATATCCTGAGCTTCACCAGTAATGATTAATCCATCACCAGATTTCTCCACCAGGCCT   |        |        |        |        |        |        |        |               |
| SARS-CoV-2 NC_045512.2 | (29904)  | -----                                                                                               |        |        |        |        |        |        |        |               |
|                        |          |                                                                                                     |        |        |        |        |        |        |        | Section 1711  |
|                        | (164161) | 164161                                                                                              | 164175 | 164186 | 164197 | 164208 | 164219 | 164230 | 164241 | 164256        |
| T4 NC 000866.4         | (163427) | TTTTTAATCAATACCCCAATATTACTATTAATACTACTGCGTTACCTAAATCTGGATGCACCTCACGAACCTTCTGCAGCTGTAATGAAATCTTTCTTA |        |        |        |        |        |        |        |               |
| SARS-CoV-2 NC_045512.2 | (29904)  | -----                                                                                               |        |        |        |        |        |        |        |               |
|                        |          |                                                                                                     |        |        |        |        |        |        |        | Section 1712  |
|                        | (164257) | 164257                                                                                              | 164263 | 164274 | 164285 | 164296 | 164307 | 164318 | 164329 | 164340 164352 |
| T4 NC 000866.4         | (163523) | GCAATGGTAATTAAAAATCGTAGCAGTTTTTTCATTCAGAACATCGTTAGAAGCTTTGATGATGTAAGTTACTTTAGACATTTTCTAATCTCCGTAA   |        |        |        |        |        |        |        |               |
| SARS-CoV-2 NC_045512.2 | (29904)  | -----                                                                                               |        |        |        |        |        |        |        |               |
|                        |          |                                                                                                     |        |        |        |        |        |        |        | Section 1713  |
|                        | (164353) | 164353                                                                                              | 164362 | 164373 | 164384 | 164395 | 164406 | 164417 | 164428 | 164448        |
| T4 NC 000866.4         | (163619) | TTCTGTATCAGTAGTTGATAGTTGTATAGTACCACAGTATGCTTTGGTTGTAAACCGTTTTGTGAAAAAATTTTAAAAATAAAAAAGGGAGAGCCT    |        |        |        |        |        |        |        |               |
| SARS-CoV-2 NC_045512.2 | (29904)  | -----                                                                                               |        |        |        |        |        |        |        |               |
|                        |          |                                                                                                     |        |        |        |        |        |        |        | Section 1714  |
|                        | (164449) | 164449                                                                                              | 164461 | 164472 | 164483 | 164494 | 164505 | 164516 | 164527 | 164544        |
| T4 NC 000866.4         | (163715) | CGGCTCTCCCTAAAAATTACTGCATGACTGTGATAACTGTCATGATAACACGTTGAATTCCGAACGCAAGAAGACCTCCTGCTACGGCTGGAACAAC   |        |        |        |        |        |        |        |               |
| SARS-CoV-2 NC_045512.2 | (29904)  | -----                                                                                               |        |        |        |        |        |        |        |               |
|                        |          |                                                                                                     |        |        |        |        |        |        |        | Section 1715  |
|                        | (164545) | 164545                                                                                              | 164560 | 164571 | 164582 | 164593 | 164604 | 164615 | 164626 | 164640        |
| T4 NC 000866.4         | (163811) | GCCTAAACCCGCCAGTAAAAATGCTACCAGATACTAATGCAGCGCTTGTAATACCAATGAATGGACTCATTTGATTTCTCTAAATCTTTGGTGTAT    |        |        |        |        |        |        |        |               |
| SARS-CoV-2 NC_045512.2 | (29904)  | -----                                                                                               |        |        |        |        |        |        |        |               |

## SARS-CoV-2 &amp; T4.apr

|                        |          |                                                                                                     |        |        |        |        |        |        |        |               |
|------------------------|----------|-----------------------------------------------------------------------------------------------------|--------|--------|--------|--------|--------|--------|--------|---------------|
|                        |          |                                                                                                     |        |        |        |        |        |        |        | Section 1716  |
|                        | (164641) | 164641                                                                                              | 164648 | 164659 | 164670 | 164681 | 164692 | 164703 | 164714 | 164725 164736 |
| T4 NC 000866.4         | (163907) | TCAGTAACTACATCAGTAGTTTTCCAATATTCGTTTTCTTTCTTTTCTTTAGCTTTAGCTTCTTCAGCAAGTTTCTTTGCTTCATCGGAAGTCATATGA |        |        |        |        |        |        |        |               |
| SARS-CoV-2 NC_045512.2 | (29904)  | -----                                                                                               |        |        |        |        |        |        |        |               |
|                        |          |                                                                                                     |        |        |        |        |        |        |        | Section 1717  |
|                        | (164737) | 164737                                                                                              | 164747 | 164758 | 164769 | 164780 | 164791 | 164802 | 164813 | 164832        |
| T4 NC 000866.4         | (164003) | AAAATATTCATTCCAAGTAGTTTATCAACATAAGAAGAATACATATCGATTTTCGAAAGTTCTTCGGTCAGTTCTTTACGAGTTTTACCCTGTACA    |        |        |        |        |        |        |        |               |
| SARS-CoV-2 NC_045512.2 | (29904)  | -----                                                                                               |        |        |        |        |        |        |        |               |
|                        |          |                                                                                                     |        |        |        |        |        |        |        | Section 1718  |
|                        | (164833) | 164833                                                                                              | 164846 | 164857 | 164868 | 164879 | 164890 | 164901 | 164912 | 164928        |
| T4 NC 000866.4         | (164099) | ACAATTTACCTGAAATTACTTTCTTAATGAAATGTGCTTTGGCAAAGGCTAAACGAAAAGCTGACTCAGTTTCTTTAATTTTGTATCAATTCGT      |        |        |        |        |        |        |        |               |
| SARS-CoV-2 NC_045512.2 | (29904)  | -----                                                                                               |        |        |        |        |        |        |        |               |
|                        |          |                                                                                                     |        |        |        |        |        |        |        | Section 1719  |
|                        | (164929) | 164929                                                                                              | 164934 | 164945 | 164956 | 164967 | 164978 | 164989 | 165000 | 165011 165024 |
| T4 NC 000866.4         | (164195) | TTTTGGACATAAGTTTACGAACCTCAACAAAGTCTTTAATTAAATCAACTACGTTATCGTAAACTTGCAGCTTTCCTTTCTCATTAATAACCGTA     |        |        |        |        |        |        |        |               |
| SARS-CoV-2 NC_045512.2 | (29904)  | -----                                                                                               |        |        |        |        |        |        |        |               |
|                        |          |                                                                                                     |        |        |        |        |        |        |        | Section 1720  |
|                        | (165025) | 165025                                                                                              | 165033 | 165044 | 165055 | 165066 | 165077 | 165088 | 165099 | 165120        |
| T4 NC 000866.4         | (164291) | ATATTCTGGGAACGACGCTCAATCAGTCCGAAGTCTTTCATAATTTTGCATGGCGTTCTTCTTCGTTATCGCTCAAAGAATATTCTTTGCGGAAT     |        |        |        |        |        |        |        |               |
| SARS-CoV-2 NC_045512.2 | (29904)  | -----                                                                                               |        |        |        |        |        |        |        |               |
|                        |          |                                                                                                     |        |        |        |        |        |        |        | Section 1721  |
|                        | (165121) | 165121                                                                                              | 165132 | 165143 | 165154 | 165165 | 165176 | 165187 | 165198 | 165216        |
| T4 NC 000866.4         | (164387) | TTAACTTTGAAGCCAAAACCATGCTCACCACAAGCATCATCCCATGTAATGAAGCCTTTATTTTCAAGTGGGTCTAAGATTTTACTCACATAAGTT    |        |        |        |        |        |        |        |               |
| SARS-CoV-2 NC_045512.2 | (29904)  | -----                                                                                               |        |        |        |        |        |        |        |               |
|                        |          |                                                                                                     |        |        |        |        |        |        |        | Section 1722  |
|                        | (165217) | 165217                                                                                              | 165231 | 165242 | 165253 | 165264 | 165275 | 165286 | 165297 | 165312        |
| T4 NC 000866.4         | (164483) | TCACGATCATACTTATACGGAATCTCAGTGATATGCATTTGAGTTCGTGAAGTAACTTATATGTTCCACGAATTTTATATTGCCCATCAATTTCA     |        |        |        |        |        |        |        |               |
| SARS-CoV-2 NC_045512.2 | (29904)  | -----                                                                                               |        |        |        |        |        |        |        |               |

## SARS-CoV-2 &amp; T4.apr

|                                |                                                                                                   |        |        |        |        |        |        |        |               |
|--------------------------------|---------------------------------------------------------------------------------------------------|--------|--------|--------|--------|--------|--------|--------|---------------|
| Section 1723                   |                                                                                                   |        |        |        |        |        |        |        |               |
| (165313)                       | 165313                                                                                            | 165319 | 165330 | 165341 | 165352 | 165363 | 165374 | 165385 | 165396 165408 |
| T4 NC 000866.4 (164579)        | ACGACTTCACCACGAAATTCTGGGAATTCTACTTTTCGGTTTAGTTACTTTCTTTCTTGAAGAGCTTGCAGTACAGCTTTCTTGACAGAAGAAACA  |        |        |        |        |        |        |        |               |
| SARS-CoV-2 NC_045512.2 (29904) | -----                                                                                             |        |        |        |        |        |        |        |               |
| Section 1724                   |                                                                                                   |        |        |        |        |        |        |        |               |
| (165409)                       | 165409                                                                                            | 165418 | 165429 | 165440 | 165451 | 165462 | 165473 | 165484 | 165504        |
| T4 NC 000866.4 (164675)        | CTATGAGGAAGAATGTAAGTTGCATAACCAGTTGCAATACCGGAAACGCCATTAAGAAGAACAGTAGGAATAATAGGCAAATAGAAAGCAGGCGGA  |        |        |        |        |        |        |        |               |
| SARS-CoV-2 NC_045512.2 (29904) | -----                                                                                             |        |        |        |        |        |        |        |               |
| Section 1725                   |                                                                                                   |        |        |        |        |        |        |        |               |
| (165505)                       | 165505                                                                                            | 165517 | 165528 | 165539 | 165550 | 165561 | 165572 | 165583 | 165600        |
| T4 NC 000866.4 (164771)        | ATGTGTTCTTTATCTTGATGTACCGGAGCATATTCAGTATCTTTATATACGTTATAGAAATTTTTACTTTACACGAGCAAAAATATAACGACTTGCC |        |        |        |        |        |        |        |               |
| SARS-CoV-2 NC_045512.2 (29904) | -----                                                                                             |        |        |        |        |        |        |        |               |
| Section 1726                   |                                                                                                   |        |        |        |        |        |        |        |               |
| (165601)                       | 165601                                                                                            | 165616 | 165627 | 165638 | 165649 | 165660 | 165671 | 165682 | 165696        |
| T4 NC 000866.4 (164867)        | GCTGCCTTTTGGACAGTACGAGAACCAGTTTCCTTGACCATCTAACAGAGGAAAGTTATTATTCCAAGTATTAGCCATCAAAGCACCTGCGTCT    |        |        |        |        |        |        |        |               |
| SARS-CoV-2 NC_045512.2 (29904) | -----                                                                                             |        |        |        |        |        |        |        |               |
| Section 1727                   |                                                                                                   |        |        |        |        |        |        |        |               |
| (165697)                       | 165697                                                                                            | 165704 | 165715 | 165726 | 165737 | 165748 | 165759 | 165770 | 165781 165792 |
| T4 NC 000866.4 (164963)        | TGTGCAGAGTTTTACCATGATGATATCCAAGGTCGCTACACCACCTGCAATAGAAGCGAGTTTGTGAACTTATCTTTATTTCTCGTGCCAAA      |        |        |        |        |        |        |        |               |
| SARS-CoV-2 NC_045512.2 (29904) | -----                                                                                             |        |        |        |        |        |        |        |               |
| Section 1728                   |                                                                                                   |        |        |        |        |        |        |        |               |
| (165793)                       | 165793                                                                                            | 165803 | 165814 | 165825 | 165836 | 165847 | 165858 | 165869 | 165888        |
| T4 NC 000866.4 (165059)        | TCAAGAGCTCGAGCAATAACAAATCGTTGAACTGGCTTAAATCCATCAATCATATTTGGGATAGCACGATTTTCAACCGTGTACATAGCATAAGCC  |        |        |        |        |        |        |        |               |
| SARS-CoV-2 NC_045512.2 (29904) | -----                                                                                             |        |        |        |        |        |        |        |               |
| Section 1729                   |                                                                                                   |        |        |        |        |        |        |        |               |
| (165889)                       | 165889                                                                                            | 165902 | 165913 | 165924 | 165935 | 165946 | 165957 | 165968 | 165984        |
| T4 NC 000866.4 (165155)        | AATGCTTCATTATCAATGATACTTTTTAAATCGCGATTATTTCAGTTGCATAAATTTACCATACTAGTGAATGTAGTGCCATAATAACATCAGAAAT |        |        |        |        |        |        |        |               |
| SARS-CoV-2 NC_045512.2 (29904) | -----                                                                                             |        |        |        |        |        |        |        |               |

## SARS-CoV-2 &amp; T4.apr

|                                |                                                                                                   |        |        |        |        |        |        |        |        |        |
|--------------------------------|---------------------------------------------------------------------------------------------------|--------|--------|--------|--------|--------|--------|--------|--------|--------|
| Section 1730                   |                                                                                                   |        |        |        |        |        |        |        |        |        |
| (165985)                       | 165985                                                                                            | 165990 | 166001 | 166012 | 166023 | 166034 | 166045 | 166056 | 166067 | 166080 |
| T4 NC 000866.4 (165251)        | GAAAAGCACGACTTGAATTAATCCGAACATTACTCCGTAATATAGTGCTACCAATAAAGCAGCAAGGGCTAATGAATAGCCCAAGATTTTCTTAAT  |        |        |        |        |        |        |        |        |        |
| SARS-CoV-2 NC_045512.2 (29904) | -----                                                                                             |        |        |        |        |        |        |        |        |        |
| Section 1731                   |                                                                                                   |        |        |        |        |        |        |        |        |        |
| (166081)                       | 166081                                                                                            | 166089 | 166100 | 166111 | 166122 | 166133 | 166144 | 166155 |        | 166176 |
| T4 NC 000866.4 (165347)        | CATTAGATAACAACACAAATGTTAAATATGCACACATACCCTGGGCTAAAGCTTGTGAAAACACACTGCTAGCATCGATACAGATAGTTAAAACAC  |        |        |        |        |        |        |        |        |        |
| SARS-CoV-2 NC_045512.2 (29904) | -----                                                                                             |        |        |        |        |        |        |        |        |        |
| Section 1732                   |                                                                                                   |        |        |        |        |        |        |        |        |        |
| (166177)                       | 166177                                                                                            | 166188 | 166199 | 166210 | 166221 | 166232 | 166243 | 166254 |        | 166272 |
| T4 NC 000866.4 (165443)        | ATGCTACTATCCAACAAATAAATGAAATAACTCCTAATAATTTTGCAATATTCATATTTTCCTCACTGGCGTCCGAAGACGCCTTTAGTTTTAAGA  |        |        |        |        |        |        |        |        |        |
| SARS-CoV-2 NC_045512.2 (29904) | -----                                                                                             |        |        |        |        |        |        |        |        |        |
| Section 1733                   |                                                                                                   |        |        |        |        |        |        |        |        |        |
| (166273)                       | 166273                                                                                            | 166287 | 166298 | 166309 | 166320 | 166331 | 166342 | 166353 |        | 166368 |
| T4 NC 000866.4 (165539)        | TTGTTACGATAGAACTGCATCACGTGTTTCGTTATGGAAATTACTCATTAATATGCCTGTAAAACAAATTTAAAGTTATCAGCCAACATACGGTTCA |        |        |        |        |        |        |        |        |        |
| SARS-CoV-2 NC_045512.2 (29904) | -----                                                                                             |        |        |        |        |        |        |        |        |        |
| Section 1734                   |                                                                                                   |        |        |        |        |        |        |        |        |        |
| (166369)                       | 166369                                                                                            | 166375 | 166386 | 166397 | 166408 | 166419 | 166430 | 166441 | 166452 | 166464 |
| T4 NC 000866.4 (165635)        | TTTCTTCGAGTGTTTGATACTCAGAATGATGATTACGAGTAAACGCCAAAGCTAGCTGACCTTTTCCAAATCCCGTCGTTAGAGGTTTCATCTTAG  |        |        |        |        |        |        |        |        |        |
| SARS-CoV-2 NC_045512.2 (29904) | -----                                                                                             |        |        |        |        |        |        |        |        |        |
| Section 1735                   |                                                                                                   |        |        |        |        |        |        |        |        |        |
| (166465)                       | 166465                                                                                            | 166474 | 166485 | 166496 | 166507 | 166518 | 166529 | 166540 |        | 166560 |
| T4 NC 000866.4 (165731)        | AAGCAGGCAGATAAAACACTGTGTATGGAACATTGTTATTTGCAATAGTACGCGCAAGTTGAGACCGGCGTTGACGAATATGACTTAAACCGCAC   |        |        |        |        |        |        |        |        |        |
| SARS-CoV-2 NC_045512.2 (29904) | -----                                                                                             |        |        |        |        |        |        |        |        |        |
| Section 1736                   |                                                                                                   |        |        |        |        |        |        |        |        |        |
| (166561)                       | 166561                                                                                            | 166573 | 166584 | 166595 | 166606 | 166617 | 166628 | 166639 |        | 166656 |
| T4 NC 000866.4 (165827)        | TGAATCCTTGCTTAGAACGCTGATTACCTACATAAAATCGTGCGAGATACGCATGGATTACTAAATGGACCACCGAGTTTACTCACTAAAAAGTAAA |        |        |        |        |        |        |        |        |        |
| SARS-CoV-2 NC_045512.2 (29904) | -----                                                                                             |        |        |        |        |        |        |        |        |        |



## SARS-CoV-2 &amp; T4.apr

|                        |          |                                                                                                     |        |        |        |        |        |        |        |               |
|------------------------|----------|-----------------------------------------------------------------------------------------------------|--------|--------|--------|--------|--------|--------|--------|---------------|
|                        |          |                                                                                                     |        |        |        |        |        |        |        | Section 1737  |
|                        | (166657) | 166657                                                                                              | 166672 | 166683 | 166694 | 166705 | 166716 | 166727 | 166738 | 166752        |
| T4 NC 000866.4         | (165923) | ATCCAGGTTT TAGATAAAATATCTTTATGCGGAGTTCTTAAAAACCATTCACCACCCTTGATTGTACCAATAACAGTAGCGCCTGCATCATT CAGAT |        |        |        |        |        |        |        |               |
| SARS-CoV-2 NC_045512.2 | (29904)  | -----                                                                                               |        |        |        |        |        |        |        |               |
|                        |          |                                                                                                     |        |        |        |        |        |        |        | Section 1738  |
|                        | (166753) | 166753                                                                                              | 166760 | 166771 | 166782 | 166793 | 166804 | 166815 | 166826 | 166837 166848 |
| T4 NC 000866.4         | (166019) | CAGTAACAGTCATATATTT CATATTAATTTCTCTAAATTATTTTCTACTCCAAGGCCGCATGAATACACACGCCATTAAATTACTCGTCGCAGT     |        |        |        |        |        |        |        |               |
| SARS-CoV-2 NC_045512.2 | (29904)  | -----                                                                                               |        |        |        |        |        |        |        |               |
|                        |          |                                                                                                     |        |        |        |        |        |        |        | Section 1739  |
|                        | (166849) | 166849                                                                                              | 166859 | 166870 | 166881 | 166892 | 166903 | 166914 | 166925 | 166944        |
| T4 NC 000866.4         | (166115) | CGACGCTCAATTCCCAAACTCTTCTACAGTATAAGTTTCAGTATCATTTCATACAGAAACGTTTATTACTATTATTTGCTAAAGTAGCATTAA       |        |        |        |        |        |        |        |               |
| SARS-CoV-2 NC_045512.2 | (29904)  | -----                                                                                               |        |        |        |        |        |        |        |               |
|                        |          |                                                                                                     |        |        |        |        |        |        |        | Section 1740  |
|                        | (166945) | 166945                                                                                              | 166958 | 166969 | 166980 | 166991 | 167002 | 167013 | 167024 | 167040        |
| T4 NC 000866.4         | (166211) | CTGTCATTTTTTCGCTAGTGCTCTTAAGAGGTGAAATACGAATTAAGTATCACCATTATCTAAACAAAAATTTTACCAACTTTTACATCTTTAA      |        |        |        |        |        |        |        |               |
| SARS-CoV-2 NC_045512.2 | (29904)  | -----                                                                                               |        |        |        |        |        |        |        |               |
|                        |          |                                                                                                     |        |        |        |        |        |        |        | Section 1741  |
|                        | (167041) | 167041                                                                                              | 167046 | 167057 | 167068 | 167079 | 167090 | 167101 | 167112 | 167123 167136 |
| T4 NC 000866.4         | (166307) | AACTTTTTCATAATTCACCTCAAGGAGTATAAAATCCAAATGCAGTTGTTGACCATCCCATCCAATATGGAAAATTTACACCAATGTAAACATAAG    |        |        |        |        |        |        |        |               |
| SARS-CoV-2 NC_045512.2 | (29904)  | -----                                                                                               |        |        |        |        |        |        |        |               |
|                        |          |                                                                                                     |        |        |        |        |        |        |        | Section 1742  |
|                        | (167137) | 167137                                                                                              | 167145 | 167156 | 167167 | 167178 | 167189 | 167200 | 167211 | 167232        |
| T4 NC 000866.4         | (166403) | AATATAAAACCAACCGCTCAGCAAATTCATCATTTTACACCATTCCAAATTGTTTCAACCACGGATTTTAAACCATTTTGATGAATATCCATTTCCT   |        |        |        |        |        |        |        |               |
| SARS-CoV-2 NC_045512.2 | (29904)  | -----                                                                                               |        |        |        |        |        |        |        |               |
|                        |          |                                                                                                     |        |        |        |        |        |        |        | Section 1743  |
|                        | (167233) | 167233                                                                                              | 167244 | 167255 | 167266 | 167277 | 167288 | 167299 | 167310 | 167328        |
| T4 NC 000866.4         | (166499) | ACTACCGCCATCAAATAAATTCCTCACTACAACCTGAACCTAAGGCAAAAATCAGCATGAAAATGAATAAAGCCGAAAAATATTATCGAAAAACCAT   |        |        |        |        |        |        |        |               |
| SARS-CoV-2 NC_045512.2 | (29904)  | -----                                                                                               |        |        |        |        |        |        |        |               |

## SARS-CoV-2 &amp; T4.apr

|                                |                                                                                                   |        |        |        |        |        |        |        |               |
|--------------------------------|---------------------------------------------------------------------------------------------------|--------|--------|--------|--------|--------|--------|--------|---------------|
| Section 1744                   |                                                                                                   |        |        |        |        |        |        |        |               |
| (167329)                       | 167329                                                                                            | 167343 | 167354 | 167365 | 167376 | 167387 | 167398 | 167409 | 167424        |
| T4 NC 000866.4 (166595)        | TCAATAAATGTAAAAGCACTGCGTTTACGTTTCATATTTTCTCACATAAATCCAAAGTAAACGTTTAAATACATCAATCATTAAAACGATTGGGAAT |        |        |        |        |        |        |        |               |
| SARS-CoV-2 NC_045512.2 (29904) | -----                                                                                             |        |        |        |        |        |        |        |               |
| Section 1745                   |                                                                                                   |        |        |        |        |        |        |        |               |
| (167425)                       | 167425                                                                                            | 167431 | 167442 | 167453 | 167464 | 167475 | 167486 | 167497 | 167508 167520 |
| T4 NC 000866.4 (166691)        | ATACTCAAAACTATTAGTATTATAACTACATTCCATATAGCTTTAATAATCTTTTTTCATTTTCTGTTCTCCATAGTTGATAGGGTAATAGTACCA  |        |        |        |        |        |        |        |               |
| SARS-CoV-2 NC_045512.2 (29904) | -----                                                                                             |        |        |        |        |        |        |        |               |
| Section 1746                   |                                                                                                   |        |        |        |        |        |        |        |               |
| (167521)                       | 167521                                                                                            | 167530 | 167541 | 167552 | 167563 | 167574 | 167585 | 167596 | 167616        |
| T4 NC 000866.4 (166787)        | CGGAAGAACAGTCTTGTAACAACCTTTTTTAAAAATATTCGTAATAAATGTGAATACCAACTACTACCGCTGAAACCTGTGCAACCCACCACGCAC  |        |        |        |        |        |        |        |               |
| SARS-CoV-2 NC_045512.2 (29904) | -----                                                                                             |        |        |        |        |        |        |        |               |
| Section 1747                   |                                                                                                   |        |        |        |        |        |        |        |               |
| (167617)                       | 167617                                                                                            | 167629 | 167640 | 167651 | 167662 | 167673 | 167684 | 167695 | 167712        |
| T4 NC 000866.4 (166883)        | AAGCAATAAGTACAGAATTCAAAATTTTCATAATAACCTCATTACAAAAGTAAATGTTAAACAAATTACTGGAATACTAATTAACCAAACAAAACA  |        |        |        |        |        |        |        |               |
| SARS-CoV-2 NC_045512.2 (29904) | -----                                                                                             |        |        |        |        |        |        |        |               |
| Section 1748                   |                                                                                                   |        |        |        |        |        |        |        |               |
| (167713)                       | 167713                                                                                            | 167728 | 167739 | 167750 | 167761 | 167772 | 167783 | 167794 | 167808        |
| T4 NC 000866.4 (166979)        | CCACCATAATGAACTCATAGTTCAATCTCAGCGATTTTCATTTTATTCTCCAAATCCGTATCAGTAGTTGATAGTTGTATAGTACCACGGTCCTTG  |        |        |        |        |        |        |        |               |
| SARS-CoV-2 NC_045512.2 (29904) | -----                                                                                             |        |        |        |        |        |        |        |               |
| Section 1749                   |                                                                                                   |        |        |        |        |        |        |        |               |
| (167809)                       | 167809                                                                                            | 167816 | 167827 | 167838 | 167849 | 167860 | 167871 | 167882 | 167893 167904 |
| T4 NC 000866.4 (167075)        | TGGTATGTAACTGTTTTGTGAAATTTTTTAAATGGAAAGATACCATCCGTTGTAGTTGCTTTTTCTTACAACCTTTACGAAGGTCTTCTCTGTCAC  |        |        |        |        |        |        |        |               |
| SARS-CoV-2 NC_045512.2 (29904) | -----                                                                                             |        |        |        |        |        |        |        |               |
| Section 1750                   |                                                                                                   |        |        |        |        |        |        |        |               |
| (167905)                       | 167905                                                                                            | 167915 | 167926 | 167937 | 167948 | 167959 | 167970 | 167981 | 168000        |
| T4 NC 000866.4 (167171)        | CGATGAACTTCGGAGTGACTGGATGACACCTGGATGAATTTCTTTAGTGTTGAATATAATTATACAGTCAGCGACTTGATGATTTAGAATGGGCC   |        |        |        |        |        |        |        |               |
| SARS-CoV-2 NC_045512.2 (29904) | -----                                                                                             |        |        |        |        |        |        |        |               |

## SARS-CoV-2 &amp; T4.apr

|                        |          |                                                                                                   |        |        |        |        |        |        |        |              |        |
|------------------------|----------|---------------------------------------------------------------------------------------------------|--------|--------|--------|--------|--------|--------|--------|--------------|--------|
|                        |          |                                                                                                   |        |        |        |        |        |        |        | Section 1751 |        |
|                        | (168001) | 168001                                                                                            | 168014 | 168025 | 168036 | 168047 | 168058 | 168069 | 168080 | 168096       |        |
| T4 NC_000866.4         | (167267) | CTAGATTTATTCCAGAACCATATGGATACTCTCCGCTGCATCCCCTTGTTACCGAAATCCAACGTGAGTCAGTTTGATGTGTCTTAACTTCTACAC  |        |        |        |        |        |        |        |              |        |
| SARS-CoV-2 NC_045512.2 | (29904)  | -----                                                                                             |        |        |        |        |        |        |        |              |        |
|                        |          |                                                                                                   |        |        |        |        |        |        |        | Section 1752 |        |
|                        | (168097) | 168097                                                                                            | 168102 | 168113 | 168124 | 168135 | 168146 | 168157 | 168168 | 168179       | 168192 |
| T4 NC_000866.4         | (167363) | GAAGCCCGCAGTATTTTGGATGAGCCAATACATCCCATGCATATGTGTACGGATCATCGACATCCTCTTGGCCTTTATTGACATATCCACTCAACC  |        |        |        |        |        |        |        |              |        |
| SARS-CoV-2 NC_045512.2 | (29904)  | -----                                                                                             |        |        |        |        |        |        |        |              |        |
|                        |          |                                                                                                   |        |        |        |        |        |        |        | Section 1753 |        |
|                        | (168193) | 168193                                                                                            | 168201 | 168212 | 168223 | 168234 | 168245 | 168256 | 168267 | 168288       |        |
| T4 NC_000866.4         | (167459) | AATCTGCCACAAAAAATCTGCGTACACAGCGATACGGCATCTTTCGATAACTTCTGCCTTATCTTGATTTGGGTTTTGTTTTAAAGAGTATCTTG   |        |        |        |        |        |        |        |              |        |
| SARS-CoV-2 NC_045512.2 | (29904)  | -----                                                                                             |        |        |        |        |        |        |        |              |        |
|                        |          |                                                                                                   |        |        |        |        |        |        |        | Section 1754 |        |
|                        | (168289) | 168289                                                                                            | 168300 | 168311 | 168322 | 168333 | 168344 | 168355 | 168366 | 168384       |        |
| T4 NC_000866.4         | (167555) | CAGTATCAGCAATTTTGACCTTCATTTACAGGTCAAGTCACTGTTTCGATAGGGTAAATGTCGGAATCTGAAATAGTCTCTGTAACCCAGGATTCTG |        |        |        |        |        |        |        |              |        |
| SARS-CoV-2 NC_045512.2 | (29904)  | -----                                                                                             |        |        |        |        |        |        |        |              |        |
|                        |          |                                                                                                   |        |        |        |        |        |        |        | Section 1755 |        |
|                        | (168385) | 168385                                                                                            | 168399 | 168410 | 168421 | 168432 | 168443 | 168454 | 168465 | 168480       |        |
| T4 NC_000866.4         | (167651) | TTTTCTGCATTTAAACTTTTCCTTTATGTCGGAATCACCGATATTCATATAAATCATAATTTCTCTTAAACAAAAGGCCGAAGCCCTTTATTTTAC  |        |        |        |        |        |        |        |              |        |
| SARS-CoV-2 NC_045512.2 | (29904)  | -----                                                                                             |        |        |        |        |        |        |        |              |        |
|                        |          |                                                                                                   |        |        |        |        |        |        |        | Section 1756 |        |
|                        | (168481) | 168481                                                                                            | 168487 | 168498 | 168509 | 168520 | 168531 | 168542 | 168553 | 168564       | 168576 |
| T4 NC_000866.4         | (167747) | TTGAATTGTGCAATTCTTTTCTCTAGACATTCAGCATAAGATTTTCATTGAGATGAACTGCGAAAGTAGCAGTTCTTGCTCAACTGCGCTAACTGTT |        |        |        |        |        |        |        |              |        |
| SARS-CoV-2 NC_045512.2 | (29904)  | -----                                                                                             |        |        |        |        |        |        |        |              |        |
|                        |          |                                                                                                   |        |        |        |        |        |        |        | Section 1757 |        |
|                        | (168577) | 168577                                                                                            | 168586 | 168597 | 168608 | 168619 | 168630 | 168641 | 168652 | 168672       |        |
| T4 NC_000866.4         | (167843) | AGAAACTTTGCGCTTTTCTAAAAATTTGCTCAGTGCATTAATTTTGAGCATTAATTGATCGTATTCTTCTTTTACTCGTGCTTGATAAGCTAACATA |        |        |        |        |        |        |        |              |        |
| SARS-CoV-2 NC_045512.2 | (29904)  | -----                                                                                             |        |        |        |        |        |        |        |              |        |

## SARS-CoV-2 &amp; T4.apr

|                        |          |                                                                                                    |        |        |        |        |        |        |        |               |
|------------------------|----------|----------------------------------------------------------------------------------------------------|--------|--------|--------|--------|--------|--------|--------|---------------|
|                        |          |                                                                                                    |        |        |        |        |        |        |        | Section 1758  |
|                        | (168673) | 168673                                                                                             | 168685 | 168696 | 168707 | 168718 | 168729 | 168740 | 168751 | 168768        |
| T4 NC_000866.4         | (167939) | ATTTTCCTTAGTTAAGGGCCGAAGCCTTATTTAAATTGTTTCAGTAACGTCTTCAACTACTTCATATTGGCAGGTACGCATTTTAGCATCGTTGTAA  |        |        |        |        |        |        |        |               |
| SARS-CoV-2 NC_045512.2 | (29904)  | -----                                                                                              |        |        |        |        |        |        |        |               |
|                        |          |                                                                                                    |        |        |        |        |        |        |        | Section 1759  |
|                        | (168769) | 168769                                                                                             | 168784 | 168795 | 168806 | 168817 | 168828 | 168839 | 168850 | 168864        |
| T4 NC_000866.4         | (168035) | TCAATCGGAATTGATACTACATCGCGAGGATGAACCTTTAACTTTTACAACCTCGGCTGGTTGAACTACCAAAGTGACGAATATAAGATTTAGAACAC |        |        |        |        |        |        |        |               |
| SARS-CoV-2 NC_045512.2 | (29904)  | -----                                                                                              |        |        |        |        |        |        |        |               |
|                        |          |                                                                                                    |        |        |        |        |        |        |        | Section 1760  |
|                        | (168865) | 168865                                                                                             | 168872 | 168883 | 168894 | 168905 | 168916 | 168927 | 168938 | 168949 168960 |
| T4 NC_000866.4         | (168131) | ACATGCAAACCACGAGAACAAGTTTGTGTATCATCGTCATTACACAGAGTACGTGGCATTTTAACTACTTTACCCGGACTGTTATCAAAGGTGTTT   |        |        |        |        |        |        |        |               |
| SARS-CoV-2 NC_045512.2 | (29904)  | -----                                                                                              |        |        |        |        |        |        |        |               |
|                        |          |                                                                                                    |        |        |        |        |        |        |        | Section 1761  |
|                        | (168961) | 168961                                                                                             | 168971 | 168982 | 168993 | 169004 | 169015 | 169026 | 169037 | 169056        |
| T4 NC_000866.4         | (168277) | GAGTGACAGTCAAAGTAATTGCTGCGAACTACTTTCCAAGCATAGAAGTAACCATCTTCTGTAATTTCAATATCGTTTGCTACCAAGAAATCAAAG   |        |        |        |        |        |        |        |               |
| SARS-CoV-2 NC_045512.2 | (29904)  | -----                                                                                              |        |        |        |        |        |        |        |               |
|                        |          |                                                                                                    |        |        |        |        |        |        |        | Section 1762  |
|                        | (169057) | 169057                                                                                             | 169070 | 169081 | 169092 | 169103 | 169114 | 169125 | 169136 | 169152        |
| T4 NC_000866.4         | (168323) | AGTCGAGATACCGCTTTTTGGCTTGGGTTTTCCAACAGATTTTCCAAGAACGGAAAATAAAATTCAAAGTTTTCGCCTTTTTCCATCGAGTCAAGA   |        |        |        |        |        |        |        |               |
| SARS-CoV-2 NC_045512.2 | (29904)  | -----                                                                                              |        |        |        |        |        |        |        |               |
|                        |          |                                                                                                    |        |        |        |        |        |        |        | Section 1763  |
|                        | (169153) | 169153 169158                                                                                      | 169169 | 169180 | 169191 | 169202 | 169213 | 169224 | 169235 | 169248        |
| T4 NC_000866.4         | (168419) | ATACGATCAACCAAACAGACCGCAATTCAATATTTGATAGAACAAGCTTCCACCTTCAATTGGAACATCGCCGGAATATATTTTTCAACAGCA      |        |        |        |        |        |        |        |               |
| SARS-CoV-2 NC_045512.2 | (29904)  | -----                                                                                              |        |        |        |        |        |        |        |               |
|                        |          |                                                                                                    |        |        |        |        |        |        |        | Section 1764  |
|                        | (169249) | 169249                                                                                             | 169257 | 169268 | 169279 | 169290 | 169301 | 169312 | 169323 | 169344        |
| T4 NC_000866.4         | (168515) | CGACGAACATTAATTTTTTGTGCCGCTTCTTCCAACCTATCCGCTACAAGCAGATTAAGAATTTCTGGAAGTTTGAATGAGTATTAGGAGTTGCG    |        |        |        |        |        |        |        |               |
| SARS-CoV-2 NC_045512.2 | (29904)  | -----                                                                                              |        |        |        |        |        |        |        |               |

## SARS-CoV-2 &amp; T4.apr

|                        |          |                                                                                                  |        |        |        |        |        |        |        |               |
|------------------------|----------|--------------------------------------------------------------------------------------------------|--------|--------|--------|--------|--------|--------|--------|---------------|
|                        |          |                                                                                                  |        |        |        |        |        |        |        | Section 1765  |
|                        | (169345) | 169345                                                                                           | 169356 | 169367 | 169378 | 169389 | 169400 | 169411 | 169422 | 169440        |
| T4 NC_000866.4         | (168611) | TTATAAGTTACGCCATCAACAGTAATTGAAATGAATTTTTTAGATGCATTCCAAATAATGTCAGATTTAGCAACTGGAGCAATAACTGCATCGCTA |        |        |        |        |        |        |        |               |
| SARS-CoV-2 NC_045512.2 | (29904)  | -----                                                                                            |        |        |        |        |        |        |        |               |
|                        |          |                                                                                                  |        |        |        |        |        |        |        | Section 1766  |
|                        | (169441) | 169441                                                                                           | 169455 | 169466 | 169477 | 169488 | 169499 | 169510 | 169521 | 169536        |
| T4 NC_000866.4         | (168707) | TTAACTTTAACTGTAATATCACCGCTAATAGTAACCTTTAGGGCGTTTAGCTTCTTCAGCATTTTTCAAACACGACGGATTGTGTCAACCGATACA |        |        |        |        |        |        |        |               |
| SARS-CoV-2 NC_045512.2 | (29904)  | -----                                                                                            |        |        |        |        |        |        |        |               |
|                        |          |                                                                                                  |        |        |        |        |        |        |        | Section 1767  |
|                        | (169537) | 169537                                                                                           | 169543 | 169554 | 169565 | 169576 | 169587 | 169598 | 169609 | 169620 169632 |
| T4 NC_000866.4         | (168803) | CCTTGCCAATCAGCCAATTCTGTGGGTGTAATTACCACTTGAATACAGTTTAACAATTTAGCTTGTTCGTTTTTGGTCAGGCATTTAATATTG    |        |        |        |        |        |        |        |               |
| SARS-CoV-2 NC_045512.2 | (29904)  | -----                                                                                            |        |        |        |        |        |        |        |               |
|                        |          |                                                                                                  |        |        |        |        |        |        |        | Section 1768  |
|                        | (169633) | 169633                                                                                           |        |        |        |        |        |        |        |               |
| T4 NC_000866.4         | (168899) | TACAT                                                                                            |        |        |        |        |        |        |        |               |
| SARS-CoV-2 NC_045512.2 | (29904)  | -----                                                                                            |        |        |        |        |        |        |        |               |
