# Supplementary material for: Ubiquitous Micro-Modular Homologies among Genomes from Viruses to Bacteria to Human Mitochondrial DNA: Platforms for Recombination during Evolution?
Source: MDPI journal article supplement (doi:10.3390/v14050885), 2022-04-24
Supplement: s1 [file s1]

| Genomes                                                  | NCBI Nucleotide Accession Number<br><a href="https://www.ncbi.nlm.nih.gov/nucleotide">https://www.ncbi.nlm.nih.gov/nucleotide</a> |
|----------------------------------------------------------|-----------------------------------------------------------------------------------------------------------------------------------|
| <i>Human adenovirus type 2</i>                           | J01917.1                                                                                                                          |
| <i>Human adenovirus type 5</i>                           | AC_000008.1                                                                                                                       |
| <i>Human adenovirus type 12</i>                          | X73487                                                                                                                            |
| <i>Autographa californica Nuclear Polyhedrosis Virus</i> | NC_001623.1                                                                                                                       |
| <i>Hepatitis B Virus</i>                                 | NC_003977.2                                                                                                                       |
| <i>HIV-1 HXB2</i>                                        | K03455.1                                                                                                                          |
| <i>Escherichia virus lambda</i>                          | NC_001416.1                                                                                                                       |
| <i>Escherichia virus Mu</i>                              | NC_000929.1                                                                                                                       |
| <i>Escherichia virus T4</i>                              | NC_000866.4                                                                                                                       |
| <i>Acidianus rod-shaped virus 1</i>                      | NC_009965.1                                                                                                                       |
| <i>Nitrosopumilus spindle-shaped virus isolate NSV1</i>  | NC_048199.1                                                                                                                       |
| <i>Sulfolobus turreted icosahedral virus</i>             | NC_005892                                                                                                                         |
| <i>Alternaria brassicicola endornavirus isolate 1</i>    | NC_026136.1                                                                                                                       |
| <i>Carrot mottle mimic umbravirus (CMoMV) dsRNA1</i>     | NC_001726.1                                                                                                                       |
| <i>Fig badnavirus 1</i>                                  | NC_017830.1                                                                                                                       |
| <i>Candidatus Carsonella ruddii</i> strain BT chromosome | CP024798.1                                                                                                                        |
| <i>Escherichia coli</i> K-12                             | NC_000913.3                                                                                                                       |
| <i>Homo sapiens</i> mitochondrion                        | NC_012920.1                                                                                                                       |
| SARS-CoV-2                                               | NC_045512.2                                                                                                                       |
| SARS-CoV-2 <i>Spike</i> region original: 21,563-25,384nt | NC_045512.2                                                                                                                       |
| SARS-CoV-2 <i>Spike</i> region delta: 21,561-25,376nt*   | MZ437368.1                                                                                                                        |

**Table S1** - NCBI Nucleotide Accession Numbers of nucleotide sequences analyzed in this article.
