# Supplementary material for: Ubiquitous Micro-Modular Homologies among Genomes from Viruses to Bacteria to Human Mitochondrial DNA: Platforms for Recombination during Evolution?
Source: MDPI journal article supplement (doi:10.3390/v14050885), 2022-04-24
Supplement: s1 [file s1]

SARS-CoV-2 & Sulfolobus turreted icosahedral virus.apr

|                                                                                            |       |                                                                                    |     |     |     |     |     |     |     |     |  |
|--------------------------------------------------------------------------------------------|-------|------------------------------------------------------------------------------------|-----|-----|-----|-----|-----|-----|-----|-----|--|
|                                                                                            |       | Section 1                                                                          |     |     |     |     |     |     |     |     |  |
| SARS-CoV-2 Reference Genome NC_045512.2<br>Sulfolobus turreted icosahedral virus NC_005892 | (1)   | 1                                                                                  | 10  | 20  | 30  | 40  | 50  | 60  | 70  | 80  |  |
|                                                                                            | (1)   | ATTAAAGGTTTATACCTTCCCAGGTAACAAACCAACCAACTTTTCGATCTCTTGTAGATCTGTTCTCTAAACGAACCTTTAA |     |     |     |     |     |     |     |     |  |
|                                                                                            | (1)   | -----                                                                              |     |     |     |     |     |     |     |     |  |
|                                                                                            |       | Section 2                                                                          |     |     |     |     |     |     |     |     |  |
| SARS-CoV-2 Reference Genome NC_045512.2<br>Sulfolobus turreted icosahedral virus NC_005892 | (81)  | 81                                                                                 | 90  | 100 | 110 | 120 | 130 | 140 | 150 | 160 |  |
|                                                                                            | (81)  | AATCTGTGTGGCTGTCACTCGGCTGCATGCTTAGTGCACCTCACGCAGTATAATTAATAACTAATTACTGTCGTTGACAGG  |     |     |     |     |     |     |     |     |  |
|                                                                                            | (1)   | -----                                                                              |     |     |     |     |     |     |     |     |  |
|                                                                                            |       | Section 3                                                                          |     |     |     |     |     |     |     |     |  |
| SARS-CoV-2 Reference Genome NC_045512.2<br>Sulfolobus turreted icosahedral virus NC_005892 | (161) | 161                                                                                | 170 | 180 | 190 | 200 | 210 | 220 | 230 | 240 |  |
|                                                                                            | (161) | ACACGAGTAACTCGTCTATCTTCTGCAGGCTGCTTACGGTTTCGTCCGTGTTGCAGCCGATCATCAGCACATCTAGGTTT   |     |     |     |     |     |     |     |     |  |
|                                                                                            | (1)   | -----                                                                              |     |     |     |     |     |     |     |     |  |
|                                                                                            |       | Section 4                                                                          |     |     |     |     |     |     |     |     |  |
| SARS-CoV-2 Reference Genome NC_045512.2<br>Sulfolobus turreted icosahedral virus NC_005892 | (241) | 241                                                                                | 250 | 260 | 270 | 280 | 290 | 300 | 310 | 320 |  |
|                                                                                            | (241) | CGTCCGGGTGTGACCGAAAGGTAAGATGGAGAGCCTTGTCCCTGGTTTCAACGAGAAAACACACGTCCAACCTCAGTTTGC  |     |     |     |     |     |     |     |     |  |
|                                                                                            | (1)   | -----                                                                              |     |     |     |     |     |     |     |     |  |
|                                                                                            |       | Section 5                                                                          |     |     |     |     |     |     |     |     |  |
| SARS-CoV-2 Reference Genome NC_045512.2<br>Sulfolobus turreted icosahedral virus NC_005892 | (321) | 321                                                                                | 330 | 340 | 350 | 360 | 370 | 380 | 390 | 400 |  |
|                                                                                            | (321) | CTGTTTTACAGGTTTCGCGACGTGCTCGTACGTGGCTTTGGAGACTCCGTGGAGGAGGTCTTATCAGAGGCACGTCAACAT  |     |     |     |     |     |     |     |     |  |
|                                                                                            | (1)   | -----                                                                              |     |     |     |     |     |     |     |     |  |
|                                                                                            |       | Section 6                                                                          |     |     |     |     |     |     |     |     |  |
| SARS-CoV-2 Reference Genome NC_045512.2<br>Sulfolobus turreted icosahedral virus NC_005892 | (401) | 401                                                                                | 410 | 420 | 430 | 440 | 450 | 460 | 470 | 480 |  |
|                                                                                            | (401) | CTTAAAGATGGCACTTGTGGCTTAGTAGAAGTTGAAAAAGGCGTTTTGCCTCAACTTGAACAGCCCTATGTGTTTCATCAA  |     |     |     |     |     |     |     |     |  |
|                                                                                            | (1)   | -----                                                                              |     |     |     |     |     |     |     |     |  |
|                                                                                            |       | Section 7                                                                          |     |     |     |     |     |     |     |     |  |
| SARS-CoV-2 Reference Genome NC_045512.2<br>Sulfolobus turreted icosahedral virus NC_005892 | (481) | 481                                                                                | 490 | 500 | 510 | 520 | 530 | 540 | 550 | 560 |  |
|                                                                                            | (481) | ACGTTCCGATGCTCGAACTGCACCTCATGGTCATGTTATGGTTGAGCTGGTAGCAGAACTCGAAGGCATTTCAGTACGGTC  |     |     |     |     |     |     |     |     |  |
|                                                                                            | (1)   | -----                                                                              |     |     |     |     |     |     |     |     |  |

SARS-CoV-2 & Sulfolobus turreted icosahedral virus.apr

|                                         |        |                                                                                    |      |      |      |      |      |      |      |      |  |
|-----------------------------------------|--------|------------------------------------------------------------------------------------|------|------|------|------|------|------|------|------|--|
|                                         |        | Section 8                                                                          |      |      |      |      |      |      |      |      |  |
| SARS-CoV-2 Reference Genome NC_045512.2 | (561)  | 561                                                                                | 570  | 580  | 590  | 600  | 610  | 620  | 630  | 640  |  |
|                                         | (561)  | GTAGTGGTGAGACACTTGGTGTCTTGTCCCTCATGTGGGCGAAATACCAGTGGCTTACCGCAAGGTTCTTCTTCGTAAG    |      |      |      |      |      |      |      |      |  |
|                                         | (1)    | -----                                                                              |      |      |      |      |      |      |      |      |  |
|                                         |        | Section 9                                                                          |      |      |      |      |      |      |      |      |  |
| SARS-CoV-2 Reference Genome NC_045512.2 | (641)  | 641                                                                                | 650  | 660  | 670  | 680  | 690  | 700  | 710  | 720  |  |
|                                         | (641)  | AACGGTAATAAAGGAGCTGGTGGCCATAGTTACGGCGCCGATCTAAAGTCATTTGACTTAGGCGACGAGCTTGGCACTGA   |      |      |      |      |      |      |      |      |  |
|                                         | (1)    | -----                                                                              |      |      |      |      |      |      |      |      |  |
|                                         |        | Section 10                                                                         |      |      |      |      |      |      |      |      |  |
| SARS-CoV-2 Reference Genome NC_045512.2 | (721)  | 721                                                                                | 730  | 740  | 750  | 760  | 770  | 780  | 790  | 800  |  |
|                                         | (721)  | TCCTTATGAAGATTTTCAAGAAAACCTGGAACACTAAACATAGCAGTGGTGTACCCGTGAACCTCATGCGTGAGCTTAACG  |      |      |      |      |      |      |      |      |  |
|                                         | (1)    | -----                                                                              |      |      |      |      |      |      |      |      |  |
|                                         |        | Section 11                                                                         |      |      |      |      |      |      |      |      |  |
| SARS-CoV-2 Reference Genome NC_045512.2 | (801)  | 801                                                                                | 810  | 820  | 830  | 840  | 850  | 860  | 870  | 880  |  |
|                                         | (801)  | GAGGGGCATACACTCGCTATGTCGATAACAACCTTCTGTGGCCCTGATGGCTACCCCTCTTGAGTGCATTAAAGACCTTCTA |      |      |      |      |      |      |      |      |  |
|                                         | (1)    | -----                                                                              |      |      |      |      |      |      |      |      |  |
|                                         |        | Section 12                                                                         |      |      |      |      |      |      |      |      |  |
| SARS-CoV-2 Reference Genome NC_045512.2 | (881)  | 881                                                                                | 890  | 900  | 910  | 920  | 930  | 940  | 950  | 960  |  |
|                                         | (881)  | GCACGTGCTGGTAAAGCTTCATGCACTTTGTCCGAACAACCTGGACTTTATTGACACTAAGAGGGGTGTATACTGCTGCCG  |      |      |      |      |      |      |      |      |  |
|                                         | (1)    | -----                                                                              |      |      |      |      |      |      |      |      |  |
|                                         |        | Section 13                                                                         |      |      |      |      |      |      |      |      |  |
| SARS-CoV-2 Reference Genome NC_045512.2 | (961)  | 961                                                                                | 970  | 980  | 990  | 1000 | 1010 | 1020 | 1030 | 1040 |  |
|                                         | (961)  | TGAACATGAGCATGAAATTGCTTGGTACACGGAACGTTCTGAAAAGAGCTATGAATTGCAGACACCTTTTGAAATTAAAT   |      |      |      |      |      |      |      |      |  |
|                                         | (1)    | -----                                                                              |      |      |      |      |      |      |      |      |  |
|                                         |        | Section 14                                                                         |      |      |      |      |      |      |      |      |  |
| SARS-CoV-2 Reference Genome NC_045512.2 | (1041) | 1041                                                                               | 1050 | 1060 | 1070 | 1080 | 1090 | 1100 | 1110 | 1120 |  |
|                                         | (1041) | TGGCAAAGAAATTTGACACCTTCAATGGGGAATGTCCAAATTTTGATTTCCCTTAAATTCCATAATCAAGACTATTCAA    |      |      |      |      |      |      |      |      |  |
|                                         | (1)    | -----                                                                              |      |      |      |      |      |      |      |      |  |

SARS-CoV-2 & Sulfolobus turreted icosahedral virus.apr

|                                         |        |                                                                                  |      |      |      |      |      |      |      |      |  |
|-----------------------------------------|--------|----------------------------------------------------------------------------------|------|------|------|------|------|------|------|------|--|
|                                         |        | Section 15                                                                       |      |      |      |      |      |      |      |      |  |
| SARS-CoV-2 Reference Genome NC_045512.2 | (1121) | 1121                                                                             | 1130 | 1140 | 1150 | 1160 | 1170 | 1180 | 1190 | 1200 |  |
|                                         | (1121) | CCAAGGGTTGAAAAGAAAAAGCTTGATGGCTTTATGGGTAGAATTGATCTGTCTATCCAGTTGCGTCACCAAATGAATG  |      |      |      |      |      |      |      |      |  |
|                                         | (1)    | -----                                                                            |      |      |      |      |      |      |      |      |  |
|                                         |        | Section 16                                                                       |      |      |      |      |      |      |      |      |  |
| SARS-CoV-2 Reference Genome NC_045512.2 | (1201) | 1201                                                                             | 1210 | 1220 | 1230 | 1240 | 1250 | 1260 | 1270 | 1280 |  |
|                                         | (1201) | CAACCAAATGTGCCTTTCAACTCTCATGAAGTGTGATCATTGTGGTGAACTTCATGGCAGACGGGCGATTTTGTTAAAG  |      |      |      |      |      |      |      |      |  |
|                                         | (1)    | -----                                                                            |      |      |      |      |      |      |      |      |  |
|                                         |        | Section 17                                                                       |      |      |      |      |      |      |      |      |  |
| SARS-CoV-2 Reference Genome NC_045512.2 | (1281) | 1281                                                                             | 1290 | 1300 | 1310 | 1320 | 1330 | 1340 | 1350 | 1360 |  |
|                                         | (1281) | CCACTTGCGAATTTTGTGGCACTGAGAATTTGACTAAAGAAGGTGCCACTACTTGTGGTTACTTACCCCAAATGCTGTT  |      |      |      |      |      |      |      |      |  |
|                                         | (1)    | -----                                                                            |      |      |      |      |      |      |      |      |  |
|                                         |        | Section 18                                                                       |      |      |      |      |      |      |      |      |  |
| SARS-CoV-2 Reference Genome NC_045512.2 | (1361) | 1361                                                                             | 1370 | 1380 | 1390 | 1400 | 1410 | 1420 | 1430 | 1440 |  |
|                                         | (1361) | GTTAAAATTTATTGTCCAGCATGTCACAATTCAGAAGTAGGACCTGAGCATAGTCTTGCCGAATACCATAATGAATCTGG |      |      |      |      |      |      |      |      |  |
|                                         | (1)    | -----                                                                            |      |      |      |      |      |      |      |      |  |
|                                         |        | Section 19                                                                       |      |      |      |      |      |      |      |      |  |
| SARS-CoV-2 Reference Genome NC_045512.2 | (1441) | 1441                                                                             | 1450 | 1460 | 1470 | 1480 | 1490 | 1500 | 1510 | 1520 |  |
|                                         | (1441) | CTTGAAAACCATTCCTTCGTAAGGGTGGTCGCACATTGCCTTTGGAGGCTGTGTGTTCTCTTATGTTGGTTGCCATAACA |      |      |      |      |      |      |      |      |  |
|                                         | (1)    | -----                                                                            |      |      |      |      |      |      |      |      |  |
|                                         |        | Section 20                                                                       |      |      |      |      |      |      |      |      |  |
| SARS-CoV-2 Reference Genome NC_045512.2 | (1521) | 1521                                                                             | 1530 | 1540 | 1550 | 1560 | 1570 | 1580 | 1590 | 1600 |  |
|                                         | (1521) | AGTGTGCCTATTGGGTTCCACGTGCTAGCGCTAACATAGGTTGTAACCATACAGGTGTTGTTGGAGAAGGTTCCGAAGGT |      |      |      |      |      |      |      |      |  |
|                                         | (1)    | -----                                                                            |      |      |      |      |      |      |      |      |  |
|                                         |        | Section 21                                                                       |      |      |      |      |      |      |      |      |  |
| SARS-CoV-2 Reference Genome NC_045512.2 | (1601) | 1601                                                                             | 1610 | 1620 | 1630 | 1640 | 1650 | 1660 | 1670 | 1680 |  |
|                                         | (1601) | CTTAATGACAACCTTCTTGAAATACTCCAAAAAGAGAAAGTCAACATCAATATTGTTGGTGACTTTAACTTAATGAAGA  |      |      |      |      |      |      |      |      |  |
|                                         | (1)    | -----                                                                            |      |      |      |      |      |      |      |      |  |

SARS-CoV-2 & Sulfolobus turreted icosahedral virus.apr

|                                                                                            |        |                                                                                   |      |      |      |      |      |      |           |
|--------------------------------------------------------------------------------------------|--------|-----------------------------------------------------------------------------------|------|------|------|------|------|------|-----------|
|                                                                                            |        | Section 22                                                                        |      |      |      |      |      |      |           |
| SARS-CoV-2 Reference Genome NC_045512.2<br>Sulfolobus turreted icosahedral virus NC_005892 | (1681) | 1681                                                                              | 1690 | 1700 | 1710 | 1720 | 1730 | 1740 | 1750 1760 |
|                                                                                            | (1681) | GATCGCCATTATTTTGGCATCTTTTCTGCTTCCACAAGTGCTTTTGTGGAACTGTGAAAGGTTTGGATTATAAAGCAT    |      |      |      |      |      |      |           |
|                                                                                            | (1)    | -----                                                                             |      |      |      |      |      |      |           |
|                                                                                            |        | Section 23                                                                        |      |      |      |      |      |      |           |
| SARS-CoV-2 Reference Genome NC_045512.2<br>Sulfolobus turreted icosahedral virus NC_005892 | (1761) | 1761                                                                              | 1770 | 1780 | 1790 | 1800 | 1810 | 1820 | 1830 1840 |
|                                                                                            | (1761) | TCAAACAAATTGTTGAATCCTGTGGTAATTTTAAAGTTACAAAAGGAAAAGCTAAAAAAGGTGCCTGGAATATTGGTGAA  |      |      |      |      |      |      |           |
|                                                                                            | (1)    | -----                                                                             |      |      |      |      |      |      |           |
|                                                                                            |        | Section 24                                                                        |      |      |      |      |      |      |           |
| SARS-CoV-2 Reference Genome NC_045512.2<br>Sulfolobus turreted icosahedral virus NC_005892 | (1841) | 1841                                                                              | 1850 | 1860 | 1870 | 1880 | 1890 | 1900 | 1910 1920 |
|                                                                                            | (1841) | CAGAAATCAATACTGAGTCCTCTTTATGCATTTGCATCAGAGGCTGCTCGTGTGTACGATCAATTTTCTCCCGCACTCT   |      |      |      |      |      |      |           |
|                                                                                            | (1)    | -----                                                                             |      |      |      |      |      |      |           |
|                                                                                            |        | Section 25                                                                        |      |      |      |      |      |      |           |
| SARS-CoV-2 Reference Genome NC_045512.2<br>Sulfolobus turreted icosahedral virus NC_005892 | (1921) | 1921                                                                              | 1930 | 1940 | 1950 | 1960 | 1970 | 1980 | 1990 2000 |
|                                                                                            | (1921) | TGAAACTGCTCAAAATTCTGTGCGTGTTTTACAGAAGGCCGCTATAACAATACTAGATGGAATTTACAGTATTTCACTGA  |      |      |      |      |      |      |           |
|                                                                                            | (1)    | -----                                                                             |      |      |      |      |      |      |           |
|                                                                                            |        | Section 26                                                                        |      |      |      |      |      |      |           |
| SARS-CoV-2 Reference Genome NC_045512.2<br>Sulfolobus turreted icosahedral virus NC_005892 | (2001) | 2001                                                                              | 2010 | 2020 | 2030 | 2040 | 2050 | 2060 | 2070 2080 |
|                                                                                            | (2001) | GACTCATTGATGCTATGATGTTACATCTGATTTGGCTACTAACAATCTAGTTGTAATGGCCTACATTACAGGTGGTGTT   |      |      |      |      |      |      |           |
|                                                                                            | (1)    | -----                                                                             |      |      |      |      |      |      |           |
|                                                                                            |        | Section 27                                                                        |      |      |      |      |      |      |           |
| SARS-CoV-2 Reference Genome NC_045512.2<br>Sulfolobus turreted icosahedral virus NC_005892 | (2081) | 2081                                                                              | 2090 | 2100 | 2110 | 2120 | 2130 | 2140 | 2150 2160 |
|                                                                                            | (2081) | GTTTCAGTTGACTTCGCAGTGGCTAACTAACATCTTTGGCACTGTTTATGAAAACTCAAACCCGTCCTTGATTGGCTTGA  |      |      |      |      |      |      |           |
|                                                                                            | (1)    | -----                                                                             |      |      |      |      |      |      |           |
|                                                                                            |        | Section 28                                                                        |      |      |      |      |      |      |           |
| SARS-CoV-2 Reference Genome NC_045512.2<br>Sulfolobus turreted icosahedral virus NC_005892 | (2161) | 2161                                                                              | 2170 | 2180 | 2190 | 2200 | 2210 | 2220 | 2230 2240 |
|                                                                                            | (2161) | AGAGAAGTTTAAAGGAAGGTGTAGAGTTTCTTAGAGACGGTTGGGAAATTGTTAAATTTATCTCAACCTGTGCTTGTGAAA |      |      |      |      |      |      |           |
|                                                                                            | (1)    | -----                                                                             |      |      |      |      |      |      |           |

SARS-CoV-2 & Sulfolobus turreted icosahedral virus.apr

|                                                                                            |        |                                                                                    |      |      |      |      |      |      |      |
|--------------------------------------------------------------------------------------------|--------|------------------------------------------------------------------------------------|------|------|------|------|------|------|------|
|                                                                                            |        | Section 29                                                                         |      |      |      |      |      |      |      |
| SARS-CoV-2 Reference Genome NC_045512.2<br>Sulfolobus turreted icosahedral virus NC_005892 | (2241) | 2241                                                                               | 2250 | 2260 | 2270 | 2280 | 2290 | 2300 | 2310 |
|                                                                                            | (2241) | TTGTCGGTGGACAAATTGTCACCTGTGCAAAGGAAATTAAGGAGAGTGTTTCAGACATTCTTTAAGCTTGTAATAAATTT   |      |      |      |      |      |      |      |
|                                                                                            | (1)    | -----                                                                              |      |      |      |      |      |      |      |
|                                                                                            |        | Section 30                                                                         |      |      |      |      |      |      |      |
| SARS-CoV-2 Reference Genome NC_045512.2<br>Sulfolobus turreted icosahedral virus NC_005892 | (2321) | 2321                                                                               | 2330 | 2340 | 2350 | 2360 | 2370 | 2380 | 2390 |
|                                                                                            | (2321) | TTGGCTTTGTGTGCTGACTCTATCATTATTGGTGGAGCTAAACTTAAAGCCTTGAATTTAGGTGAAACATTTGTCACGCA   |      |      |      |      |      |      |      |
|                                                                                            | (1)    | -----                                                                              |      |      |      |      |      |      |      |
|                                                                                            |        | Section 31                                                                         |      |      |      |      |      |      |      |
| SARS-CoV-2 Reference Genome NC_045512.2<br>Sulfolobus turreted icosahedral virus NC_005892 | (2401) | 2401                                                                               | 2410 | 2420 | 2430 | 2440 | 2450 | 2460 | 2470 |
|                                                                                            | (2401) | CTCAAAGGGATTGTACAGAAAGTGTGTTAAATCCAGAGAAGAACTGGCCTACTCATGCCTCTAAAAGCCCCAAAAGAAA    |      |      |      |      |      |      |      |
|                                                                                            | (1)    | -----                                                                              |      |      |      |      |      |      |      |
|                                                                                            |        | Section 32                                                                         |      |      |      |      |      |      |      |
| SARS-CoV-2 Reference Genome NC_045512.2<br>Sulfolobus turreted icosahedral virus NC_005892 | (2481) | 2481                                                                               | 2490 | 2500 | 2510 | 2520 | 2530 | 2540 | 2550 |
|                                                                                            | (2481) | TTATCTTCTTAGAGGGAGAAACACTTCCCACAGAAGTGTTAACAGAGGAAGTTGTCTTGAAAAGTGGTGATTTACAACCA   |      |      |      |      |      |      |      |
|                                                                                            | (1)    | -----                                                                              |      |      |      |      |      |      |      |
|                                                                                            |        | Section 33                                                                         |      |      |      |      |      |      |      |
| SARS-CoV-2 Reference Genome NC_045512.2<br>Sulfolobus turreted icosahedral virus NC_005892 | (2561) | 2561                                                                               | 2570 | 2580 | 2590 | 2600 | 2610 | 2620 | 2630 |
|                                                                                            | (2561) | TTAGAACAACCTACTAGTGAAGCTGTTGAAGCTCCATTGGTTGGTACACCAGTTTGTATTAACGGGCTTATGTTGCTCGA   |      |      |      |      |      |      |      |
|                                                                                            | (1)    | -----                                                                              |      |      |      |      |      |      |      |
|                                                                                            |        | Section 34                                                                         |      |      |      |      |      |      |      |
| SARS-CoV-2 Reference Genome NC_045512.2<br>Sulfolobus turreted icosahedral virus NC_005892 | (2641) | 2641                                                                               | 2650 | 2660 | 2670 | 2680 | 2690 | 2700 | 2710 |
|                                                                                            | (2641) | AATCAAAGACACAGAAAAGTACTGTGCCCTTGACCTAATATGATGGTAACAAACAATACCTTCACACTCAAAGGCGGTG    |      |      |      |      |      |      |      |
|                                                                                            | (1)    | -----                                                                              |      |      |      |      |      |      |      |
|                                                                                            |        | Section 35                                                                         |      |      |      |      |      |      |      |
| SARS-CoV-2 Reference Genome NC_045512.2<br>Sulfolobus turreted icosahedral virus NC_005892 | (2721) | 2721                                                                               | 2730 | 2740 | 2750 | 2760 | 2770 | 2780 | 2790 |
|                                                                                            | (2721) | CACCAACAAAGGTTACTTTTGGTGATGACACTGTGATAGAAGTGCAAGGTTACAAGAGTGTTGAATATCACTTTTGAACCTT |      |      |      |      |      |      |      |
|                                                                                            | (1)    | -----                                                                              |      |      |      |      |      |      |      |
|                                                                                            |        | 2800                                                                               |      |      |      |      |      |      |      |

SARS-CoV-2 & Sulfolobus turreted icosahedral virus.apr

|                                                                                            |        |                                                                                   |      |      |      |      |      |      |      |      |  |
|--------------------------------------------------------------------------------------------|--------|-----------------------------------------------------------------------------------|------|------|------|------|------|------|------|------|--|
|                                                                                            |        | Section 36                                                                        |      |      |      |      |      |      |      |      |  |
| SARS-CoV-2 Reference Genome NC_045512.2<br>Sulfolobus turreted icosahedral virus NC_005892 | (2801) | 2801                                                                              | 2810 | 2820 | 2830 | 2840 | 2850 | 2860 | 2870 | 2880 |  |
|                                                                                            | (2801) | GATGAAAGGATTGATAAAGTACTTAATGAGAAGTGCTCTGCCTATACAGTTGAACTCGGTACAGAAGTAAATGAGTTCGC  |      |      |      |      |      |      |      |      |  |
|                                                                                            | (1)    | -----                                                                             |      |      |      |      |      |      |      |      |  |
|                                                                                            |        | Section 37                                                                        |      |      |      |      |      |      |      |      |  |
| SARS-CoV-2 Reference Genome NC_045512.2<br>Sulfolobus turreted icosahedral virus NC_005892 | (2881) | 2881                                                                              | 2890 | 2900 | 2910 | 2920 | 2930 | 2940 | 2950 | 2960 |  |
|                                                                                            | (2881) | CTGTGTTGTGGCAGATGCTGTCATAAAAACCTTTGCAACCAGTATCTGAATTACTTACACCACTGGGCATTGATTTAGATG |      |      |      |      |      |      |      |      |  |
|                                                                                            | (1)    | -----                                                                             |      |      |      |      |      |      |      |      |  |
|                                                                                            |        | Section 38                                                                        |      |      |      |      |      |      |      |      |  |
| SARS-CoV-2 Reference Genome NC_045512.2<br>Sulfolobus turreted icosahedral virus NC_005892 | (2961) | 2961                                                                              | 2970 | 2980 | 2990 | 3000 | 3010 | 3020 | 3030 | 3040 |  |
|                                                                                            | (2961) | AGTGGAGTATGGCTACATACTACTTATTTGATGAGTCTGGTGAGTTTAAATTGGCTTCACATATGTATTGTTCTTTCTAC  |      |      |      |      |      |      |      |      |  |
|                                                                                            | (1)    | -----                                                                             |      |      |      |      |      |      |      |      |  |
|                                                                                            |        | Section 39                                                                        |      |      |      |      |      |      |      |      |  |
| SARS-CoV-2 Reference Genome NC_045512.2<br>Sulfolobus turreted icosahedral virus NC_005892 | (3041) | 3041                                                                              | 3050 | 3060 | 3070 | 3080 | 3090 | 3100 | 3110 | 3120 |  |
|                                                                                            | (3041) | CCTCCAGATGAGGATGAAGAAGAAGGTGATTGTGAAGAAGAAGAGTTTGAGCCATCAACTCAATATGAGTATGGTACTGA  |      |      |      |      |      |      |      |      |  |
|                                                                                            | (1)    | -----                                                                             |      |      |      |      |      |      |      |      |  |
|                                                                                            |        | Section 40                                                                        |      |      |      |      |      |      |      |      |  |
| SARS-CoV-2 Reference Genome NC_045512.2<br>Sulfolobus turreted icosahedral virus NC_005892 | (3121) | 3121                                                                              | 3130 | 3140 | 3150 | 3160 | 3170 | 3180 | 3190 | 3200 |  |
|                                                                                            | (3121) | AGATGATTACCAAGGTAAACCTTTGGAATTTGGTGCCACTTCTGCTGCTCTTCAACCTGAAGAAGAGCAAGAAGAAGATT  |      |      |      |      |      |      |      |      |  |
|                                                                                            | (1)    | -----                                                                             |      |      |      |      |      |      |      |      |  |
|                                                                                            |        | Section 41                                                                        |      |      |      |      |      |      |      |      |  |
| SARS-CoV-2 Reference Genome NC_045512.2<br>Sulfolobus turreted icosahedral virus NC_005892 | (3201) | 3201                                                                              | 3210 | 3220 | 3230 | 3240 | 3250 | 3260 | 3270 | 3280 |  |
|                                                                                            | (3201) | GGTTAGATGATGATAGTCAACAACTGTTGGTCAACAAGACGGCAGTGAGGACAATCAGACAACCTACTATTCAAACAATT  |      |      |      |      |      |      |      |      |  |
|                                                                                            | (1)    | -----                                                                             |      |      |      |      |      |      |      |      |  |
|                                                                                            |        | Section 42                                                                        |      |      |      |      |      |      |      |      |  |
| SARS-CoV-2 Reference Genome NC_045512.2<br>Sulfolobus turreted icosahedral virus NC_005892 | (3281) | 3281                                                                              | 3290 | 3300 | 3310 | 3320 | 3330 | 3340 | 3350 | 3360 |  |
|                                                                                            | (3281) | GTTGAGGTTCAACCTCAATTAGAGATGGAACCTACACCAGTTGTTTCAGACTATTGAAGTGAATAGTTTTAGTGGTTATTT |      |      |      |      |      |      |      |      |  |
|                                                                                            | (1)    | -----                                                                             |      |      |      |      |      |      |      |      |  |

SARS-CoV-2 & Sulfolobus turreted icosahedral virus.apr

|                                                                                            |        |                                                                                     |      |      |      |      |      |      |      |      |  |
|--------------------------------------------------------------------------------------------|--------|-------------------------------------------------------------------------------------|------|------|------|------|------|------|------|------|--|
|                                                                                            |        | Section 43                                                                          |      |      |      |      |      |      |      |      |  |
| SARS-CoV-2 Reference Genome NC_045512.2<br>Sulfolobus turreted icosahedral virus NC_005892 | (3361) | 3361                                                                                | 3370 | 3380 | 3390 | 3400 | 3410 | 3420 | 3430 | 3440 |  |
|                                                                                            | (3361) | AAAACCTTACTGACAATGTATACATTAAATGCAGACATTGTGGAGAGAGCTAAAAGGTAAAACCAACAGTGGTTGTTA      |      |      |      |      |      |      |      |      |  |
|                                                                                            | (1)    | -----TAAATATGGGTTTAGGTTTCAGAAATTTGAGAGAT-GTATTAGATGCTTTAAGGAAAAACATAGCAGATAGTTTAG   |      |      |      |      |      |      |      |      |  |
|                                                                                            |        | Section 44                                                                          |      |      |      |      |      |      |      |      |  |
| SARS-CoV-2 Reference Genome NC_045512.2<br>Sulfolobus turreted icosahedral virus NC_005892 | (3441) | 3441                                                                                | 3450 | 3460 | 3470 | 3480 | 3490 | 3500 | 3510 | 3520 |  |
|                                                                                            | (3441) | ATGCAGCCAAATGTTTACCTTAAACATGGAGGAGGTGTTGCAGGAGCCTTAAATAAGGCTACTAACAATGCCATGCAGTT    |      |      |      |      |      |      |      |      |  |
|                                                                                            | (72)   | CAGAAGCTAGAAAGCGTTAGGAAGAGGCAGGAGGAGATGTAGCAGCAGCTAGAGCAGCGGAAGAATTGGCACCCGAAGAAATA |      |      |      |      |      |      |      |      |  |
|                                                                                            |        | Section 45                                                                          |      |      |      |      |      |      |      |      |  |
| SARS-CoV-2 Reference Genome NC_045512.2<br>Sulfolobus turreted icosahedral virus NC_005892 | (3521) | 3521                                                                                | 3530 | 3540 | 3550 | 3560 | 3570 | 3580 | 3590 | 3600 |  |
|                                                                                            | (3521) | GAATCTGATGATTACATAGCTACTAATGGACCACCTTAAAGTGGGTGGTAGTTGTGTTTAAAGCGGACACAATCTTGCTAA   |      |      |      |      |      |      |      |      |  |
|                                                                                            | (152)  | GCAGCTAGACAATTAGACCTAGCAGATTTCTTACGAAGAATTAGAGGAAAGAGAGCTTTAGCGAAGAAATAGCACCTAT     |      |      |      |      |      |      |      |      |  |
|                                                                                            |        | Section 46                                                                          |      |      |      |      |      |      |      |      |  |
| SARS-CoV-2 Reference Genome NC_045512.2<br>Sulfolobus turreted icosahedral virus NC_005892 | (3601) | 3601                                                                                | 3610 | 3620 | 3630 | 3640 | 3650 | 3660 | 3670 | 3680 |  |
|                                                                                            | (3601) | ACACTGTCTTCAATGTTGTCGGGCCCAATGTTAACAAAGGTGAAGACATTCAACTTCTAAGAGTGCTTATGAAAATTTTA    |      |      |      |      |      |      |      |      |  |
|                                                                                            | (232)  | AGCAGATGAAGAAGAAGCATTAAAGAGAGCAGAAATAGCAGATGAAGAAAGAGCGCT-AAGAGAAAGAGTAGGAAAGATTG   |      |      |      |      |      |      |      |      |  |
|                                                                                            |        | Section 47                                                                          |      |      |      |      |      |      |      |      |  |
| SARS-CoV-2 Reference Genome NC_045512.2<br>Sulfolobus turreted icosahedral virus NC_005892 | (3681) | 3681                                                                                | 3690 | 3700 | 3710 | 3720 | 3730 | 3740 | 3750 | 3760 |  |
|                                                                                            | (3681) | ATCAGCACGAAGTTCTACTTGCACCAATTATTAATCAGCTGGTATTTTTGTGCTGACCCTATACATTCCTTAAGAGTTTGT   |      |      |      |      |      |      |      |      |  |
|                                                                                            | (311)  | AGTGGCTTGAAGAAAGCAGCGTTAGCAGGTTTAGGAATTTGAGGCGGCCGCATTAGGTGGATT-AGCATTTATACAGGTTTAC |      |      |      |      |      |      |      |      |  |
|                                                                                            |        | Section 48                                                                          |      |      |      |      |      |      |      |      |  |
| SARS-CoV-2 Reference Genome NC_045512.2<br>Sulfolobus turreted icosahedral virus NC_005892 | (3761) | 3761                                                                                | 3770 | 3780 | 3790 | 3800 | 3810 | 3820 | 3830 | 3840 |  |
|                                                                                            | (3761) | GTAGATACTGTTTCGCACAAATGTCTACTTAGCTGTCCTTTGATAAAATCTCTATGACAACCTTGTTTCAAGCTTTTGA     |      |      |      |      |      |      |      |      |  |
|                                                                                            | (390)  | TTGAATAGAAATCAGCCGGT-TCTCCCTACAATTTCCCAAAATCCAAAGCTCTCCAACCTAACTTTACCCCTCTCTCCAGCC  |      |      |      |      |      |      |      |      |  |
|                                                                                            |        | Section 49                                                                          |      |      |      |      |      |      |      |      |  |
| SARS-CoV-2 Reference Genome NC_045512.2<br>Sulfolobus turreted icosahedral virus NC_005892 | (3841) | 3841                                                                                | 3850 | 3860 | 3870 | 3880 | 3890 | 3900 | 3910 | 3920 |  |
|                                                                                            | (3841) | AATGAAGAGTGAAA--AGCAAGTTGAACAAAGAGATCGGCTGAGAT--TCCTAAAGAGGAAGTTAAGCCATTATTAAGCTGAA |      |      |      |      |      |      |      |      |  |
|                                                                                            | (469)  | CCTACAACCTTCCTCCAACCTAAGTTACCAAACTCTCCGCGCTCTTGGCGCTGTCCCCGGAATCCCTCTAGTCTAGT       |      |      |      |      |      |      |      |      |  |

SARS-CoV-2 & Sulfolobus turreted icosahedral virus.apr

|                                                                                            |        |                                                                                        |      |      |      |      |      |      |      |      |  |
|--------------------------------------------------------------------------------------------|--------|----------------------------------------------------------------------------------------|------|------|------|------|------|------|------|------|--|
|                                                                                            |        | Section 50                                                                             |      |      |      |      |      |      |      |      |  |
| SARS-CoV-2 Reference Genome NC_045512.2<br>Sulfolobus turreted icosahedral virus NC_005892 | (3921) | 3921                                                                                   | 3930 | 3940 | 3950 | 3960 | 3970 | 3980 | 3990 | 4000 |  |
|                                                                                            | (3917) | AGTAAACCTTCAGTTGAACAGAGAAAACAAGATGATAAGAAAATCAAAAGCTTGCTGTGAAGAAAGTTACAAACAACCTCTGGA   |      |      |      |      |      |      |      |      |  |
|                                                                                            | (549)  | AGCCCAAGCTCTCCAGCGGGCGTAGTAGAGGCAGGCCCAATGGCTATGCGAGGCGTAGTACCAAGCCCAAGCAGCCCT-A       |      |      |      |      |      |      |      |      |  |
|                                                                                            |        | Section 51                                                                             |      |      |      |      |      |      |      |      |  |
| SARS-CoV-2 Reference Genome NC_045512.2<br>Sulfolobus turreted icosahedral virus NC_005892 | (4001) | 4001                                                                                   | 4010 | 4020 | 4030 | 4040 | 4050 | 4060 | 4070 | 4080 |  |
|                                                                                            | (3997) | AGAAACTAAGTTCCTCACAGAAAACTTGTTA-----CTTTATATTGACATTAAATGGCAATCTTCATCCAGATTCT--TG       |      |      |      |      |      |      |      |      |  |
|                                                                                            | (628)  | GCTCACCAAGCTCACCAAGTAGTCACTCTCTGGAAGTCTTGAGGCTGACCTAAACAAAAGGTATTTGGTGTTACAGTG         |      |      |      |      |      |      |      |      |  |
|                                                                                            |        | Section 52                                                                             |      |      |      |      |      |      |      |      |  |
| SARS-CoV-2 Reference Genome NC_045512.2<br>Sulfolobus turreted icosahedral virus NC_005892 | (4081) | 4081                                                                                   | 4090 | 4100 | 4110 | 4120 | 4130 | 4140 | 4150 | 4160 |  |
|                                                                                            | (4068) | CCACCTCTTGTTAGTAGACATTGACATCACTTTCTTAAAGAAAGATGCTCCATATATAGTGGGTGATGTTGTTCAAG--AGG     |      |      |      |      |      |      |      |      |  |
|                                                                                            | (708)  | TGGGTTTGATAGTTATAGCGCTAGTGAFCATAGCTTTAGTCAATATATTATATCTATCATAAGAAGCACAAGCACGG          |      |      |      |      |      |      |      |      |  |
|                                                                                            |        | Section 53                                                                             |      |      |      |      |      |      |      |      |  |
| SARS-CoV-2 Reference Genome NC_045512.2<br>Sulfolobus turreted icosahedral virus NC_005892 | (4161) | 4161                                                                                   | 4170 | 4180 | 4190 | 4200 | 4210 | 4220 | 4230 | 4240 |  |
|                                                                                            | (4146) | GTGTTTTAAC TGCTGTGGTTATACCTACTAAAAAGGCTGGTGCACTACTGAAATGCTAGCGAAGCTTTGAGAAAAGTG        |      |      |      |      |      |      |      |      |  |
|                                                                                            | (788)  | GTGAGATAAGATGGCATTAGGAGATGCAATAGGAGACATTTGCTGATGAGATACGAAGTTATTTATCCGATTTATATGGAGG     |      |      |      |      |      |      |      |      |  |
|                                                                                            |        | Section 54                                                                             |      |      |      |      |      |      |      |      |  |
| SARS-CoV-2 Reference Genome NC_045512.2<br>Sulfolobus turreted icosahedral virus NC_005892 | (4241) | 4241                                                                                   | 4250 | 4260 | 4270 | 4280 | 4290 | 4300 | 4310 | 4320 |  |
|                                                                                            | (4226) | CCACACAGACAAATATATAACCACTTACC CGGGTCAAGGTTTAATGGTTACACTGTAGAGGAGGC AAGACAGTCTTTAA      |      |      |      |      |      |      |      |      |  |
|                                                                                            | (868)  | ATTA-AGAAGAGTATATAGC-ACTACG CCGGGTAAATTC TAGCAATAGGAGGAGCTGCAGGGTTAGGCGCTG-GATTTGC     |      |      |      |      |      |      |      |      |  |
|                                                                                            |        | Section 55                                                                             |      |      |      |      |      |      |      |      |  |
| SARS-CoV-2 Reference Genome NC_045512.2<br>Sulfolobus turreted icosahedral virus NC_005892 | (4321) | 4321                                                                                   | 4330 | 4340 | 4350 | 4360 | 4370 | 4380 | 4390 | 4400 |  |
|                                                                                            | (4306) | AAAGTGTAAGTGCCTTTTACATTCTACCATCTATTATCTCTAATGAGAAGCAAGAAATTCCTGGAACTGTTTCTTGGA         |      |      |      |      |      |      |      |      |  |
|                                                                                            | (945)  | TAGGTGCAGGAATTGGCGCCGGAAATACACGGTTTCG-AGATAGGAGAAATATGGAGGGAATCCGTTAAATCCTTTGTAGTA     |      |      |      |      |      |      |      |      |  |
|                                                                                            |        | Section 56                                                                             |      |      |      |      |      |      |      |      |  |
| SARS-CoV-2 Reference Genome NC_045512.2<br>Sulfolobus turreted icosahedral virus NC_005892 | (4401) | 4401                                                                                   | 4410 | 4420 | 4430 | 4440 | 4450 | 4460 | 4470 | 4480 |  |
|                                                                                            | (4386) | A TTTTCGAGAAA TGC TTGCACATGCAGAAAGAAA CACGCAAAATTAATGCCTGTCTGTGTGAAAACTAAAGCCATAGTTTCA |      |      |      |      |      |      |      |      |  |
|                                                                                            | (1024) | C TTTTCGT-ACGTGC CATATTCTCCTTACGCC CAC-CGAATGAAAGAGAACC CCTCAGAAA TTTATAGAAACTACGAG    |      |      |      |      |      |      |      |      |  |



SARS-CoV-2 & Sulfolobus turreted icosahedral virus.apr

|                                                 |        |            |      |         |        |        |         |         |        |         |          |        |        |        |        |        |       |         |           |
|-------------------------------------------------|--------|------------|------|---------|--------|--------|---------|---------|--------|---------|----------|--------|--------|--------|--------|--------|-------|---------|-----------|
|                                                 |        | Section 57 |      |         |        |        |         |         |        |         |          |        |        |        |        |        |       |         |           |
|                                                 |        | (4481)     | 4481 | 4490    | 4500   | 4510   | 4520    | 4530    | 4540   | 4550    | 4560     |        |        |        |        |        |       |         |           |
| SARS-CoV-2 Reference Genome NC_045512.2         | (4466) |            | A    | CTATA   | CAGCGT | TAAATA | TAAGGG  | TATTA   | AAATAC | AAGAGGG | TGTGGTTG | GATTAT | GGTGT  | CATAG  | ATTTT  | ACTTT  | TATAC | CACC    | CAG       |
| Sulfolobus turreted icosahedral virus NC_005892 | (1102) |            | T    | CTTGG   | CGCTT  | TCTT   | TAAATCC | GTTAG   | TAAATT | ACGATA  | ATCATC   | TATC   | ATTG   | GATCAT | AGTGA  | TAGTG  | TTTCT | AAATAG  | CTACGC    |
|                                                 |        | Section 58 |      |         |        |        |         |         |        |         |          |        |        |        |        |        |       |         |           |
|                                                 |        | (4561)     | 4561 | 4570    | 4580   | 4590   | 4600    | 4610    | 4620   | 4630    | 4640     |        |        |        |        |        |       |         |           |
| SARS-CoV-2 Reference Genome NC_045512.2         | (4546) |            | T    | AAACAA  | CTGTAG | CGTCA  | CTTAT   | CAACAC  | ACTTA  | ACGAT   | CTCTAA   | ATGA   | AACTCT | TTGTT  | ACAAT  | GCCACT | TGGCT | ATAGT   | AA        |
| Sulfolobus turreted icosahedral virus NC_005892 | (1182) |            | GG   | AAAGTA  | AGGGG  | GGATGT | AAAT    | GAAACA  | ATTGA  | AGAA    | ATTCAG   | TATG   | AGGAC  | AGCAG  | GAGG   | ATCAG  | GATAC | TCCCG   | -GCTCAA   |
|                                                 |        | Section 59 |      |         |        |        |         |         |        |         |          |        |        |        |        |        |       |         |           |
|                                                 |        | (4641)     | 4641 | 4650    | 4660   | 4670   | 4680    | 4690    | 4700   | 4710    | 4720     |        |        |        |        |        |       |         |           |
| SARS-CoV-2 Reference Genome NC_045512.2         | (4626) |            | C    | ACATGG  | CTTAAT | T-TGG  | AAGAG   | CTGCT   | CGGTAT | ATGAG   | ATCTCA   | AAAGT  | GCCAG  | CTAC   | AGTTT  | CTGT   | TTTCT | TTTCA   | CC        |
| Sulfolobus turreted icosahedral virus NC_005892 | (1261) |            | ACT  | AAAA    | CGTAG  | TAGTTC | AGCAG   | AAATCC  | CAAGT  | T-AT    | TCTG     | GGAT   | TTTCA  | --GTG  | TG-GAT | TATG   | GATTT | ATCA    | TTATATTAG |
|                                                 |        | Section 60 |      |         |        |        |         |         |        |         |          |        |        |        |        |        |       |         |           |
|                                                 |        | (4721)     | 4721 | 4730    | 4740   | 4750   | 4760    | 4770    | 4780   | 4790    | 4800     |        |        |        |        |        |       |         |           |
| SARS-CoV-2 Reference Genome NC_045512.2         | (4705) |            | T    | GATGCT  | GTTAC  | AGCGT  | TATA    | AATGGT  | TATCT  | TACTT   | CTTCT    | TCTAA  | AACAC  | CCT-G  | AAGAAC | ATTTT  | TATT  | GAA     | -CCATCTC  |
| Sulfolobus turreted icosahedral virus NC_005892 | (1337) |            | TG   | CTAAT   | TCTG   | TAGT   | TTTG    | ATAA    | TAAAT  | TGAGG   | TGAA     | ACG-GT | GAGA   | AGATCA | AAGAGG | TGGA   | TTCA  | GAA     | GGCGAT    |
|                                                 |        | Section 61 |      |         |        |        |         |         |        |         |          |        |        |        |        |        |       |         |           |
|                                                 |        | (4801)     | 4801 | 4810    | 4820   | 4830   | 4840    | 4850    | 4860   | 4870    | 4880     |        |        |        |        |        |       |         |           |
| SARS-CoV-2 Reference Genome NC_045512.2         | (4783) |            | A    | CTTGCT  | GGTTCT | TATAAA | GATGGT  | CCTATT  | CTGG   | ACAATCT | ACAACT   | -----  | AGGT   | ATAGA  | ATTTC  | TTA    | AGAG  |         |           |
| Sulfolobus turreted icosahedral virus NC_005892 | (1416) |            | AC   | ATTAC   | GGAG   | CTTTG  | AAAA    | AAATGGT | TGAAG  | AAAG    | ACAATC   | CTGA   | ATTGT  | TGAA   | AGGAA  | ACGG   | CGAA  | ATAG    | CGTTTACA  |
|                                                 |        | Section 62 |      |         |        |        |         |         |        |         |          |        |        |        |        |        |       |         |           |
|                                                 |        | (4881)     | 4881 | 4890    | 4900   | 4910   | 4920    | 4930    | 4940   | 4950    | 4960     |        |        |        |        |        |       |         |           |
| SARS-CoV-2 Reference Genome NC_045512.2         | (4855) |            | A    | GGTGATA | AAAGT  | TGTAT  | ATTAC   | ACATA   | ---G   | TAAATC  | CTAC     | CACAT  | TCCAC  | CTAG   | ATG    | TGAAG  | TTA-- | TACCT   | TTGACA    |
| Sulfolobus turreted icosahedral virus NC_005892 | (1496) |            | A    | ACTTAG  | AGAA   | TTFAT  | GAGAA   | ACATA   | AAGG   | ATGAA   | CTTA     | CAGAT  | -CAC   | CGTA   | -AGC   | GTCAA  | ATTAA | ACTTAG  | CACTTACAT |
|                                                 |        | Section 63 |      |         |        |        |         |         |        |         |          |        |        |        |        |        |       |         |           |
|                                                 |        | (4961)     | 4961 | 4970    | 4980   | 4990   | 5000    | 5010    | 5020   | 5030    | 5040     |        |        |        |        |        |       |         |           |
| SARS-CoV-2 Reference Genome NC_045512.2         | (4930) |            | T    | CTTAA   | GACACT | CTTCT  | TTTGA   | GAGAA   | GTGAG  | GA      | CTA      | TTAAG  | GTGT   | TTACA  | ACAGT  | AGACAA | CATT  | AACTCC  | ACACGC    |
| Sulfolobus turreted icosahedral virus NC_005892 | (1574) |            | TA   | -CA     | TAAAA  | TGGCA  | ATGAGA  | AGGAG   | GAAGA  | AGAA    | AAGTTA   | AGCGT  | GGT--  | ATAGT  | GCAATT | CTTAG  | ACCTG | CACTTGA |           |

SARS-CoV-2 & Sulfolobus turreted icosahedral virus.apr

|                                                                                            |        |            |               |            |             |         |           |           |            |          |            |
|--------------------------------------------------------------------------------------------|--------|------------|---------------|------------|-------------|---------|-----------|-----------|------------|----------|------------|
|                                                                                            |        | Section 64 |               |            |             |         |           |           |            |          |            |
| SARS-CoV-2 Reference Genome NC_045512.2<br>Sulfolobus turreted icosahedral virus NC_005892 | (5041) | 5041       | 5050          | 5060       | 5070        | 5080    | 5090      | 5100      | 5110       | 5120     |            |
|                                                                                            | (5010) | AAGT       | TGTGGACATGT   | CAATGACATA | TGGACAACAGT | TGGTCC  | AAC       | TATTTGGAT | GGAGCTGATG | TTACTAA  | AA-TAA     |
|                                                                                            | (1651) | ACAC       | TGTCCCTTATCA  | CAATCGTAC  | TGGATTGTTCT | TACGAA  | TAT       | CATTTAT   | TCGAAAAT   | ATGAGGAA | AA         |
|                                                                                            |        | Section 65 |               |            |             |         |           |           |            |          |            |
| SARS-CoV-2 Reference Genome NC_045512.2<br>Sulfolobus turreted icosahedral virus NC_005892 | (5121) | 5121       | 5130          | 5140       | 5150        | 5160    | 5170      | 5180      | 5190       | 5200     |            |
|                                                                                            | (5089) | ACCTCAT    | AATTCACATG    | AAGGTAA    | AACATT      | TTATGTT | TTACCT    | AATGATG   | ACACTCT    | ACGTGTT  | TGAGGC     |
|                                                                                            | (1731) | AGGTTAG    | AGGAGAGAAC    | AAGATGGA   | TGGAA       | TACATAA | TAAAGAGAA | GAA       | TTAAAGAA   | TGATA    | AGGCATT    |
|                                                                                            |        | Section 66 |               |            |             |         |           |           |            |          |            |
| SARS-CoV-2 Reference Genome NC_045512.2<br>Sulfolobus turreted icosahedral virus NC_005892 | (5201) | 5201       | 5210          | 5220       | 5230        | 5240    | 5250      | 5260      | 5270       | 5280     |            |
|                                                                                            | (5169) | ACCACACAAC | TGATCTAG      | TTTTCTGG   | GTAGGTAC    | ATGTCAG | CATTAA    | TCACTAA   | AAAGT      | TGAAAT   | ACCCAC     |
|                                                                                            | (1809) | AC         | TTT--CTTTT    | TTCCCA     | TTTGCT--    | GTGGG-G | ATT       | AGTCT     | TTGACT     | TCCTG    | AAAT---    |
|                                                                                            |        | Section 67 |               |            |             |         |           |           |            |          |            |
| SARS-CoV-2 Reference Genome NC_045512.2<br>Sulfolobus turreted icosahedral virus NC_005892 | (5281) | 5281       | 5290          | 5300       | 5310        | 5320    | 5330      | 5340      | 5350       | 5360     |            |
|                                                                                            | (5249) | AATG       | GTTTAACTTCTAT | TAAATGG    | GCAGAT      | AACAAC  | TGTTAT    | CTTGCACT  | GCATTG     | TTAA     | CCTCCAA    |
|                                                                                            | (1880) | AGAC       | GTAAAGAG----  | TGCAAGAT   | GATACAA     | TTATT   | TTATATT   | CTTCTC    | ----       | TTCTCTT  | TATTG      |
|                                                                                            |        | Section 68 |               |            |             |         |           |           |            |          |            |
| SARS-CoV-2 Reference Genome NC_045512.2<br>Sulfolobus turreted icosahedral virus NC_005892 | (5361) | 5361       | 5370          | 5380       | 5390        | 5400    | 5410      | 5420      | 5430       | 5440     |            |
|                                                                                            | (5329) | GAAG       | TTTTAA        | TCCAC      | TGCTC       | -TACAG  | ATG       | C-TTATT   | ACAGAGCA   | AGGG     | CTGG       |
|                                                                                            | (1951) | -T         | AGCAG         | AA         | GAT         | AAC     | GATAC     | TATTT     | AATTC      | TCGATT   | CTGAGAT    |
|                                                                                            |        | Section 69 |               |            |             |         |           |           |            |          |            |
| SARS-CoV-2 Reference Genome NC_045512.2<br>Sulfolobus turreted icosahedral virus NC_005892 | (5441) | 5441       | 5450          | 5460       | 5470        | 5480    | 5490      | 5500      | 5510       | 5520     |            |
|                                                                                            | (5407) | CTT        | AGCT          | TACTGT     | TAA-TA      | AGACA   | GTAGG     | TGA-GT    | TAGGT      | GATG     | TTAGAGAAAC |
|                                                                                            | (2029) | GAA        | AAC           | TACTC      | TTTC        | TGA     | TTTT      | GTTTA     | TAA        | TAA      | TTGT       |
|                                                                                            |        | Section 70 |               |            |             |         |           |           |            |          |            |
| SARS-CoV-2 Reference Genome NC_045512.2<br>Sulfolobus turreted icosahedral virus NC_005892 | (5521) | 5521       | 5530          | 5540       | 5550        | 5560    | 5570      | 5580      | 5590       | 5600     |            |
|                                                                                            | (5485) | T-TT       | AGAT          | TCT        | TGCA-AAA    | AGTCT   | TTGAAC    | GTGGT     | GTGTAA     | AACT     | TGTGGAC    |
|                                                                                            | (2104) | TTAG       | AGTC          | TAA        | TGCA        | AAAA    | ATT       | TTTAA     | AAC        | CTT      | TAG        |

SARS-CoV-2 & Sulfolobus turreted icosahedral virus.apr

|                                                 |        |                        |               |          |           |       |         |        |        |              |                  |            |         |      |                      |        |         |        |         |          |      |      |       |      |        |
|-------------------------------------------------|--------|------------------------|---------------|----------|-----------|-------|---------|--------|--------|--------------|------------------|------------|---------|------|----------------------|--------|---------|--------|---------|----------|------|------|-------|------|--------|
|                                                 |        | Section 71             |               |          |           |       |         |        |        |              |                  |            |         |      |                      |        |         |        |         |          |      |      |       |      |        |
|                                                 |        | (5601)                 | 5601          | 5610     | 5620      | 5630  | 5640    | 5650   | 5660   | 5670         | 5680             |            |         |      |                      |        |         |        |         |          |      |      |       |      |        |
| SARS-CoV-2 Reference Genome NC_045512.2         | (5563) | AGCTGTTATGTACATGGGCACA | CTTCTT        | ATGAA    | CAT       | TTAAG | AAAGGTG | TTCA   | GATACC | TTGT         | ACGTGTGGTAAACAAG |            |         |      |                      |        |         |        |         |          |      |      |       |      |        |
| Sulfolobus turreted icosahedral virus NC_005892 | (2184) | AGATTGTGATCAAAAT       | TCCAAA        | ATGGCAAA | AGGAA     | TTAG  | TTTT    | AA     | TACAC  | TTAA         | -----GTTGAATCA   | GT         | TAA     | AT   | AAGAC                |        |         |        |         |          |      |      |       |      |        |
|                                                 |        | Section 72             |               |          |           |       |         |        |        |              |                  |            |         |      |                      |        |         |        |         |          |      |      |       |      |        |
|                                                 |        | (5681)                 | 5681          | 5690     | 5700      | 5710  | 5720    | 5730   | 5740   | 5750         | 5760             |            |         |      |                      |        |         |        |         |          |      |      |       |      |        |
| SARS-CoV-2 Reference Genome NC_045512.2         | (5643) | CTACA                  | AAATATC       | TAG      | TACAACAGG | AGTC  | ACCTT   | TGTT   | ATGAT  | GTC          | AGCACC           | ACCTGCT    | CAGTATG | AAC  | TTAAGCATGGT          |        |         |        |         |          |      |      |       |      |        |
| Sulfolobus turreted icosahedral virus NC_005892 | (2259) | GGGT                   | AGAGAGG       | TAG      | -----     | ACCT  | AGCTT   | CTTCA  | AA     | ATTC         | GA               | AGAGGA     | ATA     | TGTT | TGTTGTACATGATGAAGTAT |        |         |        |         |          |      |      |       |      |        |
|                                                 |        | Section 73             |               |          |           |       |         |        |        |              |                  |            |         |      |                      |        |         |        |         |          |      |      |       |      |        |
|                                                 |        | (5761)                 | 5761          | 5770     | 5780      | 5790  | 5800    | 5810   | 5820   | 5830         | 5840             |            |         |      |                      |        |         |        |         |          |      |      |       |      |        |
| SARS-CoV-2 Reference Genome NC_045512.2         | (5723) | ACAT                   | TTACTT        | TGTG     | CTAGT     | GAGTA | CAC     | TGGTA  | AT     | TAC          | CA               | GTGT       | GGT     | CA   | CTATAAAC             | ATAT   | AAC     | TTCTAA | AGAA    | ACTTTTGT |      |      |       |      |        |
| Sulfolobus turreted icosahedral virus NC_005892 | (2329) | AT                     | AT            | -----    | TATG      | AGC   | GT      | AAGCA  | AGAT   | TACAC        | GA               | TAC        | TT      | GAAC | GAA                  | CA     | ---     | AGCTA  | AAGA    | A        | TT   | ---  | AG    | ATT  | TAGTA  |
|                                                 |        | Section 74             |               |          |           |       |         |        |        |              |                  |            |         |      |                      |        |         |        |         |          |      |      |       |      |        |
|                                                 |        | (5841)                 | 5841          | 5850     | 5860      | 5870  | 5880    | 5890   | 5900   | 5910         | 5920             |            |         |      |                      |        |         |        |         |          |      |      |       |      |        |
| SARS-CoV-2 Reference Genome NC_045512.2         | (5802) | ATTGCATAG              | CGGTGCTTTACTT | ACAAAG   | TCT       | CAGA  | AT      | CAAAGG | TCCT   | ATT          | ACG              | GATG       | TTTTCT  | ACAA | AGAAAA               | -CAG   |         |        |         |          |      |      |       |      |        |
| Sulfolobus turreted icosahedral virus NC_005892 | (2399) | AGGAGGGG               | GAGA          | -----    | AT        | ATGT  | TT      | CAGT   | GA     | TT           | CAA              | ---        | TTGA    | AAGA | A                    | GAT    | TTGAAG  | AATT   | AGAAAA  | G        | CAG  |      |       |      |        |
|                                                 |        | Section 75             |               |          |           |       |         |        |        |              |                  |            |         |      |                      |        |         |        |         |          |      |      |       |      |        |
|                                                 |        | (5921)                 | 5921          | 5930     | 5940      | 5950  | 5960    | 5970   | 5980   | 5990         | 6000             |            |         |      |                      |        |         |        |         |          |      |      |       |      |        |
| SARS-CoV-2 Reference Genome NC_045512.2         | (5881) | T                      | TACACA        | AC       | ACCATA    | AAA   | CCAG    | TTACTT | AT     | AAATTGG      | ATGGTGT          | TGTTTGTACA | GAAA    | T    | GACC                 | CTAAGT | TGGACAA | TT     |         |          |      |      |       |      |        |
| Sulfolobus turreted icosahedral virus NC_005892 | (2464) | A                      | TAGACA        | GTA      | TAAGGG    | AAA   | AATG    | GGAGC  | AG     | ATTGCAA      | AGCAGCA          | TGAAGAAGAT | GAAAC   | T    | AGGG                 | CTAG   | GC      | TGG    | ----    | TT       |      |      |       |      |        |
|                                                 |        | Section 76             |               |          |           |       |         |        |        |              |                  |            |         |      |                      |        |         |        |         |          |      |      |       |      |        |
|                                                 |        | (6001)                 | 6001          | 6010     | 6020      | 6030  | 6040    | 6050   | 6060   | 6070         | 6080             |            |         |      |                      |        |         |        |         |          |      |      |       |      |        |
| SARS-CoV-2 Reference Genome NC_045512.2         | (5961) | A                      | TTATA         | -AGA     | AA        | GACA  | ATTCTT  | AT     | TT     | CACAGAGCAACC | AAT              | TGA        | TCT     | T    | TAC                  | CAAAC  | CAACC   | AT     | ATCCA   | AA       | CGCA | AGC  | TT    |      |        |
| Sulfolobus turreted icosahedral virus NC_005892 | (2539) | G                      | TAA           | -AT      | AGATC     | G     | TGTGG   | --     | AT     | GA           | -----            | GTT        | ATA     | TGA  | ATA                  | TAT    | TGT     | CAAAC  | GTGAAAC | AGGGT    | AAAG | GAGA | AG    | TT   |        |
|                                                 |        | Section 77             |               |          |           |       |         |        |        |              |                  |            |         |      |                      |        |         |        |         |          |      |      |       |      |        |
|                                                 |        | (6081)                 | 6081          | 6090     | 6100      | 6110  | 6120    | 6130   | 6140   | 6150         | 6160             |            |         |      |                      |        |         |        |         |          |      |      |       |      |        |
| SARS-CoV-2 Reference Genome NC_045512.2         | (6040) | C                      | GATA          | ATTTT    | AA        | GT    | TTG     | TATGT  | G      | ATAAT        | ATCAA            | ATTTG      | CTG     | AT   | GAT                  | TTA    | AACC    | AG     | TTAA    | CT       | GGT  | TAT  | AAGAA | AA   | CTGCTT |
| Sulfolobus turreted icosahedral virus NC_005892 | (2607) | T                      | GATA          | CGGAA    | AA        | AG    | TTG     | -GA    | AG     | TTAAT        | -----            | C          | GAA     | AG   | GATTA                | GCGA   | AT      | TTAA   | TG      | GAATA    | -AAG | AGG  | CAG   | TTCA |        |

SARS-CoV-2 & Sulfolobus turreted icosahedral virus.apr

|                                                 |        |                                                                                            |      |      |      |      |      |      |      |      |      |
|-------------------------------------------------|--------|--------------------------------------------------------------------------------------------|------|------|------|------|------|------|------|------|------|
|                                                 |        | Section 78                                                                                 |      |      |      |      |      |      |      |      |      |
|                                                 |        | (6161)                                                                                     | 6161 | 6170 | 6180 | 6190 | 6200 | 6210 | 6220 | 6230 | 6240 |
| SARS-CoV-2 Reference Genome NC_045512.2         | (6120) | C AAGAGAGC TTAAAGTTACATTTTCCCTGACTTAAATGGTGATGTGGTGGCTATGATTATAAAACCTACACACCCCTCT          |      |      |      |      |      |      |      |      |      |
| Sulfolobus turreted icosahedral virus NC_005892 | (2675) | G AAGA TG GG TTAAAGTTACATTTTCCCTGACTTAAATGGTGATGTGGTGGCTATGATTATAAAACCTACACACCCCTCT        |      |      |      |      |      |      |      |      |      |
|                                                 |        | Section 79                                                                                 |      |      |      |      |      |      |      |      |      |
|                                                 |        | (6241)                                                                                     | 6241 | 6250 | 6260 | 6270 | 6280 | 6290 | 6300 | 6310 | 6320 |
| SARS-CoV-2 Reference Genome NC_045512.2         | (6200) | TTTAAAGAAAGGAGCTAAATGTGTTACATAAAACCTATGTGTTTGGCA GTGTTAACTAAAGCA-ACCTAATAAAGCCACGTATATAAC  |      |      |      |      |      |      |      |      |      |
| Sulfolobus turreted icosahedral virus NC_005892 | (2748) | AA TAAAGAACTGGG-AGACTCTT-TATGAAATTATGTGTTAAACAGAGGAA GAA GCA AAC CCG--GAGCAATGGAGTAAA      |      |      |      |      |      |      |      |      |      |
|                                                 |        | Section 80                                                                                 |      |      |      |      |      |      |      |      |      |
|                                                 |        | (6321)                                                                                     | 6321 | 6330 | 6340 | 6350 | 6360 | 6370 | 6380 | 6390 | 6400 |
| SARS-CoV-2 Reference Genome NC_045512.2         | (6279) | CAAATACCTGGTGTATA CGTTGTC TTTGGAGCA CA AAA CAGT TGAACATCAAATTCGTTTGATGTACTGAA GTCA GAG     |      |      |      |      |      |      |      |      |      |
| Sulfolobus turreted icosahedral virus NC_005892 | (2824) | G AAG--ACT--TTGACG CGTTAA-TATTTGTA CA TTT AAAA CAGT ATTGGGCTATGATGAATCTA--CATAT--CGTCA TTT |      |      |      |      |      |      |      |      |      |
|                                                 |        | Section 81                                                                                 |      |      |      |      |      |      |      |      |      |
|                                                 |        | (6401)                                                                                     | 6401 | 6410 | 6420 | 6430 | 6440 | 6450 | 6460 | 6470 | 6480 |
| SARS-CoV-2 Reference Genome NC_045512.2         | (6359) | GACCGCGCAGGGAATGGATAATCTTGCCTGCGAAGATCTAAACCAAGTCTCTGAA GAAGTAGTGGAA AATCTACCATACA         |      |      |      |      |      |      |      |      |      |
| Sulfolobus turreted icosahedral virus NC_005892 | (2895) | --CGCTACTCACATTAAGATTTTCGAT---AATCAAGATCTGTAAACGAA---TTA AAAAGGATTTCATG CAGGGAA            |      |      |      |      |      |      |      |      |      |
|                                                 |        | Section 82                                                                                 |      |      |      |      |      |      |      |      |      |
|                                                 |        | (6481)                                                                                     | 6481 | 6490 | 6500 | 6510 | 6520 | 6530 | 6540 | 6550 | 6560 |
| SARS-CoV-2 Reference Genome NC_045512.2         | (6439) | GAAAGACGTTCTTGAGTGTAAATGTGAAAACCTACCGAAGTTGTAGGAGACATTATACTAAACCCAGCA AATATAGTTTAA         |      |      |      |      |      |      |      |      |      |
| Sulfolobus turreted icosahedral virus NC_005892 | (2967) | G AAGCA TCC-CGGCAGAAAAAAGAC AAA TCTGCATTATTTATATCCCGAAG AATA TATAAAAG-T CAGCGAGTTCTGTAA    |      |      |      |      |      |      |      |      |      |
|                                                 |        | Section 83                                                                                 |      |      |      |      |      |      |      |      |      |
|                                                 |        | (6561)                                                                                     | 6561 | 6570 | 6580 | 6590 | 6600 | 6610 | 6620 | 6630 | 6640 |
| SARS-CoV-2 Reference Genome NC_045512.2         | (6519) | AAATTACAGAAAGAGGTTGGCCACACAGATCTAAATGCTGCTTATGTAGAC-AATTCTAGTCTTACTATTAA GAAAC---C         |      |      |      |      |      |      |      |      |      |
| Sulfolobus turreted icosahedral virus NC_005892 | (3045) | T AGATTCAAAGAGGAAAAAAAGAGAGATGTAAACGTTTCAATTAACCTACAGCTGCATTTAACGACAA TGAAGCAGGG           |      |      |      |      |      |      |      |      |      |
|                                                 |        | Section 84                                                                                 |      |      |      |      |      |      |      |      |      |
|                                                 |        | (6641)                                                                                     | 6641 | 6650 | 6660 | 6670 | 6680 | 6690 | 6700 | 6710 | 6720 |
| SARS-CoV-2 Reference Genome NC_045512.2         | (6595) | TAATGAATTATCTAGAGTATTAGGT TTGAAAA CCCTTGC TAC TCATGGTTTAGCTGCTGTTAATA GTGTCCCT TGGGATA     |      |      |      |      |      |      |      |      |      |
| Sulfolobus turreted icosahedral virus NC_005892 | (3125) | AAGGGAATCATAAAGACA-----TTGAAAA G-----TACGGTG TAGCTAGTCTTTTCGGTCTGAAA TGGCAAA               |      |      |      |      |      |      |      |      |      |

SARS-CoV-2 & Sulfolobus turreted icosahedral virus.apr

|                                                 |        |            |          |           |          |            |          |        |         |          |         |
|-------------------------------------------------|--------|------------|----------|-----------|----------|------------|----------|--------|---------|----------|---------|
|                                                 |        | Section 85 |          |           |          |            |          |        |         |          |         |
|                                                 |        | (6721)     | 6721     | 6730      | 6740     | 6750       | 6760     | 6770   | 6780    | 6790     | 6800    |
| SARS-CoV-2 Reference Genome NC_045512.2         | (6675) | CT         | ATAGC    | TAATTA    | TGCT     | AAGCCTTTTC | TTAA     | CAAAGT | TGTTAGT | ACAAC    | TACTAA  |
| Sulfolobus turreted icosahedral virus NC_005892 | (3191) | AC         | ATGT     | TGT---    | TGTA     | AAGAGA     | ACGATT   | GTGCTA | TGAGTCA | AAGAC    | GGGA    |
|                                                 |        | Section 86 |          |           |          |            |          |        |         |          |         |
|                                                 |        | (6801)     | 6801     | 6810      | 6820     | 6830       | 6840     | 6850   | 6860    | 6870     | 6880    |
| SARS-CoV-2 Reference Genome NC_045512.2         | (6755) | GTT        | TGTACT   | AATTTATAT | GCCTTATT | TCTTT      | ACTTTATT | GCTAC  | AATTGT  | CTACTTT  | TACTAGA |
| Sulfolobus turreted icosahedral virus NC_005892 | (3264) | AGA        | TCTTCT   | ATTCC     | CTTATT   | GGA-C      | AATCTATT | ---    | ACGATT  | AAGGAGGA | TAGC-GA |
|                                                 |        | Section 87 |          |           |          |            |          |        |         |          |         |
|                                                 |        | (6881)     | 6881     | 6890      | 6900     | 6910       | 6920     | 6930   | 6940    | 6950     | 6960    |
| SARS-CoV-2 Reference Genome NC_045512.2         | (6835) | TAA        | AGC--    | ATCTATG   | CCGACT   | ACTATA     | TAGCAA   | AGAA   | TAC     | TGTT     | AAAGAG  |
| Sulfolobus turreted icosahedral virus NC_005892 | (3338) | AT         | ACGCTAGG | ACTCA     | CATATG   | AGAGTTA    | CAAAGC   | ATGG   | TAAAC   | AGT-TC   | AGCAA   |
|                                                 |        | Section 88 |          |           |          |            |          |        |         |          |         |
|                                                 |        | (6961)     | 6961     | 6970      | 6980     | 6990       | 7000     | 7010   | 7020    | 7030     | 7040    |
| SARS-CoV-2 Reference Genome NC_045512.2         | (6912) | ATT        | ATTTGA   | AGTCAC    | CTAATTTT | CTAAAC     | TGATAA   | AATAT  | TATTA   | AATTG    | GTTT    |
| Sulfolobus turreted icosahedral virus NC_005892 | (3414) | AAG        | AGGGAG   | AGGAAC    | TTAACCC  | CA         | TGATAT   | TCGTAG | ATCTGCC | GCTTAC   | TGTT    |
|                                                 |        | Section 89 |          |           |          |            |          |        |         |          |         |
|                                                 |        | (7041)     | 7041     | 7050      | 7060     | 7070       | 7080     | 7090   | 7100    | 7110     | 7120    |
| SARS-CoV-2 Reference Genome NC_045512.2         | (6991) | TTT        | AATCTA   | CTCAACC   | GCTGCTT  | TAGGT      | GTTT     | TAA    | TGTC    | TAAT     | TAG     |
| Sulfolobus turreted icosahedral virus NC_005892 | (3494) | TTG        | AATCGA   | TAA---    | GC       | GATT       | CGCCG    | GAGG   | TGA     | AAGAT    | TTAG    |
|                                                 |        | Section 90 |          |           |          |            |          |        |         |          |         |
|                                                 |        | (7121)     | 7121     | 7130      | 7140     | 7150       | 7160     | 7170   | 7180    | 7190     | 7200    |
| SARS-CoV-2 Reference Genome NC_045512.2         | (7071) | GCT        | ATTTGA   | ACTCT     | ACTAAT   | GTCACT     | TATTG    | CAACCT | ACT-GT  | ACTG     | GTTCTA  |
| Sulfolobus turreted icosahedral virus NC_005892 | (3560) | A          | CCG---   | AACAC     | ACTCAT   | TTCT       | TATTAC   | GCGTC  | ACTC    | GAAATG   | AGGCTA  |
|                                                 |        | Section 91 |          |           |          |            |          |        |         |          |         |
|                                                 |        | (7201)     | 7201     | 7210      | 7220     | 7230       | 7240     | 7250   | 7260    | 7270     | 7280    |
| SARS-CoV-2 Reference Genome NC_045512.2         | (7150) | AG         | AT       | TCTTTAG   | ACAC     | CCTATCC    | TTC      | TTAGAA | CTAT    | ACAA     | ATTAC   |
| Sulfolobus turreted icosahedral virus NC_005892 | (3629) | AG         | --       | TCTTTAG   | -CT      | CAAGAAT    | TAG      | TTAGAA | CCCGA   | AAAGG    | TC      |

SARS-CoV-2 & Sulfolobus turreted icosahedral virus.apr

|                                                                                            |        |                      |              |              |                  |             |               |            |           |             |              |
|--------------------------------------------------------------------------------------------|--------|----------------------|--------------|--------------|------------------|-------------|---------------|------------|-----------|-------------|--------------|
|                                                                                            |        | Section 92           |              |              |                  |             |               |            |           |             |              |
| SARS-CoV-2 Reference Genome NC_045512.2<br>Sulfolobus turreted icosahedral virus NC_005892 | (7281) | 7281                 | 7290         | 7300         | 7310             | 7320        | 7330          | 7340       | 7350      | 7360        |              |
|                                                                                            | (7230) | GCTTAGTTGCAGAGTGGTTT | TTGGCA       | TATATTCTTT   | CACTAGGTTTTCTATG | TACTTG      | GATTGGC       | TGC        | AATCAT    | GC          |              |
|                                                                                            | (3704) | TTTCTCTTCAAAATTTT    | TATACTTC     | TATTTCTATT   | TAAGTTATG        | GACGCAGTAA  | TACGCGC       | ATTGGC     | ---       | AATGGC      | GC           |
|                                                                                            |        | Section 93           |              |              |                  |             |               |            |           |             |              |
| SARS-CoV-2 Reference Genome NC_045512.2<br>Sulfolobus turreted icosahedral virus NC_005892 | (7361) | 7361                 | 7370         | 7380         | 7390             | 7400        | 7410          | 7420       | 7430      | 7440        |              |
|                                                                                            | (7308) | AATTGTTTTCAGCTATTT   | TTGCAGTACA   | TTTATTAGTAA  | TTCTTGCTTAT      | GTGTTAATA   | ATTATCTT      | GTAC       | AAATG     |             |              |
|                                                                                            | (3781) | TTTTCCTATCGCCTATC    | TGATTATA     | TCCTTCAAATAA | GAAGAGGAGG       | AAAGTAATA   | TCATTATAG     | ---        | AAAT      | -           |              |
|                                                                                            |        | Section 94           |              |              |                  |             |               |            |           |             |              |
| SARS-CoV-2 Reference Genome NC_045512.2<br>Sulfolobus turreted icosahedral virus NC_005892 | (7441) | 7441                 | 7450         | 7460         | 7470             | 7480        | 7490          | 7500       | 7510      | 7520        |              |
|                                                                                            | (7388) | GCCC                 | CGATTTT      | CAGCTATGGTT  | AGAA             | GTACATCTT   | CTTGCATCATTTT | ATTATGTAT  | TGAAAAGTT | TATGTGCAT   | GTGT         |
|                                                                                            | (3856) | ----                 | CTTTT        | TAGACTCTAAG  | ACAA             | GTA         | TTTGTGCTAG    | CAGAATA    | GCATTAG   | AGGATTT     | TAGCAGCTAT   |
|                                                                                            |        | Section 95           |              |              |                  |             |               |            |           |             |              |
| SARS-CoV-2 Reference Genome NC_045512.2<br>Sulfolobus turreted icosahedral virus NC_005892 | (7521) | 7521                 | 7530         | 7540         | 7550             | 7560        | 7570          | 7580       | 7590      | 7600        |              |
|                                                                                            | (7468) | AGACGGTTGTAATTCAT    | CAACTTGTAT   | GATGTGTTACAA | ACGTAAT          | AGAGCAACA   | AGAGTCGA      | ATGTA      | ---       | CAACTATT    | G            |
|                                                                                            | (3929) | AG---                | GCGCTATCTCAG | CA           | GTTCATTAT        | CGCCGAGCAGC | TATCTATA      | ACGAGAA    | GATCAGA   | AATCAG      | GTCA         |
|                                                                                            |        | Section 96           |              |              |                  |             |               |            |           |             |              |
| SARS-CoV-2 Reference Genome NC_045512.2<br>Sulfolobus turreted icosahedral virus NC_005892 | (7601) | 7601                 | 7610         | 7620         | 7630             | 7640        | 7650          | 7660       | 7670      | 7680        |              |
|                                                                                            | (7545) | TTAATGGTGT           | TAGAAGGTC    | CTTTTATG     | TCTATGCTAAT      | GGAGGTAAAG  | CTTTTGCA      | AACTACAC   | AATTGGA   | ATTGTT      |              |
|                                                                                            | (4005) | CAAAAT               | GCTATAGAC    | GCGATGGCG    | AAATCAAC         | ---         | AGTTGTGGCT    | ACAGAAAGT  | TATTAA    | GGACACGACAG | TTACTGGAT    |
|                                                                                            |        | Section 97           |              |              |                  |             |               |            |           |             |              |
| SARS-CoV-2 Reference Genome NC_045512.2<br>Sulfolobus turreted icosahedral virus NC_005892 | (7681) | 7681                 | 7690         | 7700         | 7710             | 7720        | 7730          | 7740       | 7750      | 7760        |              |
|                                                                                            | (7625) | AATGTGATACAT         | TCTGTGCTGG   | TAGTACATTT   | ATTAGTGA         | TGAAGTTG    | CGAGAGAC      | TTGTCACTA  | CAGTTT    | AAAAGACC    |              |
|                                                                                            | (4082) | TAA                  | TGCATTA--G   | TGAATATGG    | ACACTCTCAG       | AGACGTAA    | ACGATTG       | GCAAGT     | CG----    | AAATCTCAAA  | ATCAGCC      |
|                                                                                            |        | Section 98           |              |              |                  |             |               |            |           |             |              |
| SARS-CoV-2 Reference Genome NC_045512.2<br>Sulfolobus turreted icosahedral virus NC_005892 | (7761) | 7761                 | 7770         | 7780         | 7790             | 7800        | 7810          | 7820       | 7830      | 7840        |              |
|                                                                                            | (7705) | AA                   | TAAATCCTACT  | GACCA        | GTCTTCTTACAT     | CGTTGATAGT  | GTACAGTGA     | AGAA       | TGGTTCCAT | CCATCTTT    | TA           |
|                                                                                            | (4155) | GC                   | TA---AA      | AGTAATATC    | TTTTTTTCT        | TGCTCGA     | AGTAA         | TACTT----- | CTTTT     | TGGT---     | ATTTCTTTTATA |

SARS-CoV-2 & Sulfolobus turreted icosahedral virus.apr

|                                                 |        |             |          |          |              |        |        |          |          |          |          |          |         |          |          |             |           |         |         |       |        |         |
|-------------------------------------------------|--------|-------------|----------|----------|--------------|--------|--------|----------|----------|----------|----------|----------|---------|----------|----------|-------------|-----------|---------|---------|-------|--------|---------|
|                                                 |        | Section 99  |          |          |              |        |        |          |          |          |          |          |         |          |          |             |           |         |         |       |        |         |
|                                                 |        | (7841)      | 7841     | 7850     | 7860         | 7870   | 7880   | 7890     | 7900     | 7910     | 7920     |          |         |          |          |             |           |         |         |       |        |         |
| SARS-CoV-2 Reference Genome NC_045512.2         | (7785) | AA          | GCTGG--  | TC       | AAAAGACTTATG | AA     | AGACAT | TCTCTCTC | TC       | ATTTTGT  | TAACTTAG | ACACACCT | TGAGAGC | TA       | ATAACACT | A           |           |         |         |       |        |         |
| Sulfolobus turreted icosahedral virus NC_005892 | (4224) | T           | ACTCTTTC | TC       | TAACTCTAAG   | TT     | AGAGGT | AA       | TATGAAAA | T        | AAAAA    | TA---    | CTTAA   | ATCAG    | ATT      | CGGATATGG   | ATAGAA    |         |         |       |        |         |
|                                                 |        | Section 100 |          |          |              |        |        |          |          |          |          |          |         |          |          |             |           |         |         |       |        |         |
|                                                 |        | (7921)      | 7921     | 7930     | 7940         | 7950   | 7960   | 7970     | 7980     | 7990     | 8000     |          |         |          |          |             |           |         |         |       |        |         |
| SARS-CoV-2 Reference Genome NC_045512.2         | (7863) | AA          | GTTTCAT  | TGCCTA   | ATTAA        | TGTTAT | AGTTT  | TTGATGGT | AAATC    | AAATATGT | G        | AAGAA    | TCATCT  | GCAAAAT  | C        | AGCGTCTGTT  |           |         |         |       |        |         |
| Sulfolobus turreted icosahedral virus NC_005892 | (4300) | AT          | GTCAGAT  | G----    | AGGAA        | CTTTA  | AGTTT  | GT       | CAATA    | AAATC    | TTAGAA   | G        | TGTAA-- | ATAAG    | TATAG    | TGAGAGGAAGC |           |         |         |       |        |         |
|                                                 |        | Section 101 |          |          |              |        |        |          |          |          |          |          |         |          |          |             |           |         |         |       |        |         |
|                                                 |        | (8001)      | 8001     | 8010     | 8020         | 8030   | 8040   | 8050     | 8060     | 8070     | 8080     |          |         |          |          |             |           |         |         |       |        |         |
| SARS-CoV-2 Reference Genome NC_045512.2         | (7943) | T           | ACTACAGT | CAGCTTA  | TGTGT-       | CAACCT | TATAC  | TGTTAC   | TAGATC   | AGGCAT   | TTAG     | TGTCTG   | ATGTTGG | TGA      | TAGT     | GCGGAAG     |           |         |         |       |        |         |
| Sulfolobus turreted icosahedral virus NC_005892 | (4374) | G           | AAA      | AAATGA   | ACGAA        | AAATAT | GCAGAT | TATTT    | TAGG     | ACAAAT   | TC       | TAGGG    | TTGG    | GATAA-   | ATGACAA  | TGAGAA      | TAAATTACA |         |         |       |        |         |
|                                                 |        | Section 102 |          |          |              |        |        |          |          |          |          |          |         |          |          |             |           |         |         |       |        |         |
|                                                 |        | (8081)      | 8081     | 8090     | 8100         | 8110   | 8120   | 8130     | 8140     | 8150     | 8160     |          |         |          |          |             |           |         |         |       |        |         |
| SARS-CoV-2 Reference Genome NC_045512.2         | (8022) | TT          | GCAGTT   | TAAAA    | TGTTTGA      | TGCTTA | CGTTA  | ATACGT   | TTTCAT   | CACTTT   | TAA      | CGTAC    | CAATGG  | AAAAA    | CTCAAA   | ACACTA      |           |         |         |       |        |         |
| Sulfolobus turreted icosahedral virus NC_005892 | (4453) | TT          | TAAGATAG | GAA----  | GAGAAC       | TA--   | TTAGA  | ACATAT   | TAGA     | ---      | AAGATATG | CGTTAC   | CGAT--  | ATAAA    | TAAAGAT  | ATCA        |           |         |         |       |        |         |
|                                                 |        | Section 103 |          |          |              |        |        |          |          |          |          |          |         |          |          |             |           |         |         |       |        |         |
|                                                 |        | (8161)      | 8161     | 8170     | 8180         | 8190   | 8200   | 8210     | 8220     | 8230     | 8240     |          |         |          |          |             |           |         |         |       |        |         |
| SARS-CoV-2 Reference Genome NC_045512.2         | (8102) | G           | TTGCAACT | -GCA     | GAAAGC       | TGAAC  | TTGCA  | AA       | GAAATGT  | GT       | CCTTAGA  | CAATGT   | CCTTAT  | CTACTTTT | TATTT    | CAGCAGCT    | CGGC      |         |         |       |        |         |
| Sulfolobus turreted icosahedral virus NC_005892 | (4522) | G           | AG       | GCAATTAG | GA-AAGC      | A-ATC  | G---   | AGAT-G   | TTAGT    | -        | AAAAGA   | AGAAAT   | TAGAAA  | AAAGAGAC | TGTT     | CCGTAGCT    | ----      |         |         |       |        |         |
|                                                 |        | Section 104 |          |          |              |        |        |          |          |          |          |          |         |          |          |             |           |         |         |       |        |         |
|                                                 |        | (8241)      | 8241     | 8250     | 8260         | 8270   | 8280   | 8290     | 8300     | 8310     | 8320     |          |         |          |          |             |           |         |         |       |        |         |
| SARS-CoV-2 Reference Genome NC_045512.2         | (8181) | AA          | G        | GTTTGTT  | GAT          | TCA    | GATGT  | AGAA     | CTAAAG   | ATGTT    | GGTT     | GAA      | TGTC    | TTAAA    | TTGTCA   | CATCAAT     | CTGACAT   | TAGAGTT |         |       |        |         |
| Sulfolobus turreted icosahedral virus NC_005892 | (4591) | AA          | AG       | TAGAAAA  | GAT          | AATGA  | GAT    | TGTGA    | GCT      | AAAATGA  | ----     | GAA      | C       | GCTTT    | TTTTT    | TTATAC      | CTTC      | GATGGG  | GAGTGTG | AGGC  |        |         |
|                                                 |        | Section 105 |          |          |              |        |        |          |          |          |          |          |         |          |          |             |           |         |         |       |        |         |
|                                                 |        | (8321)      | 8321     | 8330     | 8340         | 8350   | 8360   | 8370     | 8380     | 8390     | 8400     |          |         |          |          |             |           |         |         |       |        |         |
| SARS-CoV-2 Reference Genome NC_045512.2         | (8261) | A           | CTGG     | C        | GATAG        | TT     | GTAAT  | TA       | ACTAT    | ATATG    | TC       | ACCTAT   | AA      | CAAG     | TTG      | AAAAC       | ATGACAC   | CCCGT   | GACCT   | TGGTG | CTTGAT |         |
| Sulfolobus turreted icosahedral virus NC_005892 | (4667) | T           | CCCC     | ----     | TTAT         | --     | TGATTT | TCT      | TG       | TC       | AAAAAT   | GATAT    | AGA     | AATAC    | GTGAT    | TCTGT       | CACGT     | AGAAA   | T       | CA    | TG     | TAGCAGT |

SARS-CoV-2 & Sulfolobus turreted icosahedral virus.apr

|                                                                                            |        |             |           |              |             |           |           |           |           |         |           |
|--------------------------------------------------------------------------------------------|--------|-------------|-----------|--------------|-------------|-----------|-----------|-----------|-----------|---------|-----------|
|                                                                                            |        | Section 106 |           |              |             |           |           |           |           |         |           |
| SARS-CoV-2 Reference Genome NC_045512.2<br>Sulfolobus turreted icosahedral virus NC_005892 | (8401) | 8401        | 8410      | 8420         | 8430        | 8440      | 8450      | 8460      | 8470      | 8480    |           |
|                                                                                            | (8341) | TGACTGTAGT  | GCGCGTC   | ATATTAA      | TGCGCAGGT   | AGCAAAAAG | TCACACAT  | TGCTTTGA  | TATGGA    | ACGTTA  | AAGA      |
|                                                                                            | (8470) | TCA-----    | GAGGGA    | ATAGCGT      | TAGACAT     | GT-----   | TCCTTGA   | AAAGAT    | TATGAC    | ACGTTA  | GCAT      |
|                                                                                            | (4740) |             |           |              |             |           |           |           |           |         |           |
|                                                                                            |        | Section 107 |           |              |             |           |           |           |           |         |           |
| SARS-CoV-2 Reference Genome NC_045512.2<br>Sulfolobus turreted icosahedral virus NC_005892 | (8481) | 8481        | 8490      | 8500         | 8510        | 8520      | 8530      | 8540      | 8550      | 8560    |           |
|                                                                                            | (8421) | TGTATTGTCT  | GAACAAC   | TACGAAAC     | AAATACGTAGT | GCTGCT    | TAAAA     | GAATAA    | CTTACCT   | TTTAA   | GTT       |
|                                                                                            | (4804) | GATGAG----  | GATGTAG   | TACCGAT      | AGATA-----  | GATTTT    | CAAAA     | AGTAGA    | GGCTAAA   | TTTAA   | TGAG      |
|                                                                                            | (4804) |             |           |              |             |           |           |           |           |         |           |
|                                                                                            |        | Section 108 |           |              |             |           |           |           |           |         |           |
| SARS-CoV-2 Reference Genome NC_045512.2<br>Sulfolobus turreted icosahedral virus NC_005892 | (8561) | 8561        | 8570      | 8580         | 8590        | 8600      | 8610      | 8620      | 8630      | 8640    |           |
|                                                                                            | (8501) | ACTAC       | TAGACAA   | GTGTTAA      | TGTTGTAA    | CAACAAAGA | TAGCACTTA | AGGGTGGT  | TAAATTGTT | AAATA   | ATTGGT    |
|                                                                                            | (4873) | GTGTT       | TGTG--    | GCTATTAT     | TATT-TAA    | AGACGCT-- | TAG-AGGCT | ACTCTG    | TTTATA    | AGG---  | AAAGATTGG |
|                                                                                            | (4873) |             |           |              |             |           |           |           |           |         |           |
|                                                                                            |        | Section 109 |           |              |             |           |           |           |           |         |           |
| SARS-CoV-2 Reference Genome NC_045512.2<br>Sulfolobus turreted icosahedral virus NC_005892 | (8641) | 8641        | 8650      | 8660         | 8670        | 8680      | 8690      | 8700      | 8710      | 8720    |           |
|                                                                                            | (8581) | GTTAATTAA   | AGTTAC    | ACTTGTG      | TTCCTTT     | TTGTTGCT  | GCTATTTT  | CTATTAA   | TAAACA    | CCTGTTC | ATGTC     |
|                                                                                            | (4944) | AAATATTGAT  | GGGGAAG   | TAAACGG--    | ATGTTG      | CTAGGT-T  | TCACATTT  | TATTA     | AAAAGA    | GGAATTT | CTGAGA    |
|                                                                                            | (4944) |             |           |              |             |           |           |           |           |         |           |
|                                                                                            |        | Section 110 |           |              |             |           |           |           |           |         |           |
| SARS-CoV-2 Reference Genome NC_045512.2<br>Sulfolobus turreted icosahedral virus NC_005892 | (8721) | 8721        | 8730      | 8740         | 8750        | 8760      | 8770      | 8780      | 8790      | 8800    |           |
|                                                                                            | (8661) | ATAC        | TGACTTTT  | CAAGTGAAATCA | TAGGAT      | TACAAG    | GCTATTGA  | TGGTGGTGT | CAC       | TCGTGAC | ATAC      |
|                                                                                            | (5020) | AGAC        | CAGCATTTC | -----        | TAGCGT      | TTCAAG    | CTATAGA   | A----TCCC | CGCATTG   | GATAG-  | GCGAAG    |
|                                                                                            | (5020) |             |           |              |             |           |           |           |           |         |           |
|                                                                                            |        | Section 111 |           |              |             |           |           |           |           |         |           |
| SARS-CoV-2 Reference Genome NC_045512.2<br>Sulfolobus turreted icosahedral virus NC_005892 | (8801) | 8801        | 8810      | 8820         | 8830        | 8840      | 8850      | 8860      | 8870      | 8880    |           |
|                                                                                            | (8741) | TGTTT       | TGCTAACAA | ACATGCT      | GATTTT      | TGACACAT  | TGGTTT    | AGCCAG    | CGTGTGGT  | TAGTTA  | CTAATGA   |
|                                                                                            | (5084) | T-TTTCT     | CAACGC    | ACAAGC       | CGCGGAC     | TTACGCT   | TTAAGC    | AGTCT     | GAAAG     | CATAT   | CACTT     |
|                                                                                            | (5084) |             |           |              |             |           |           |           |           |         |           |
|                                                                                            |        | Section 112 |           |              |             |           |           |           |           |         |           |
| SARS-CoV-2 Reference Genome NC_045512.2<br>Sulfolobus turreted icosahedral virus NC_005892 | (8881) | 8881        | 8890      | 8900         | 8910        | 8920      | 8930      | 8940      | 8950      | 8960    |           |
|                                                                                            | (8821) | ATTGA       | TTGCTG    | CAGTCA       | TAA         | CAAGAGA   | AGTGGG    | TTTTG     | TCGTG     | CTGCT   | TGCTGGC   |
|                                                                                            | (5162) | ----        | TTTCTC    | CAGAT        | AGAA-----   | AATTAA    | TTTTG     | CAAAA     | C---      | GATCAG  | CTAGC     |
|                                                                                            | (5162) |             |           |              |             |           |           |           |           |         |           |



SARS-CoV-2 & Sulfolobus turreted icosahedral virus.apr

|                                                                                            |        |             |      |      |      |      |      |      |      |      |   |
|--------------------------------------------------------------------------------------------|--------|-------------|------|------|------|------|------|------|------|------|---|
|                                                                                            |        | Section 113 |      |      |      |      |      |      |      |      |   |
| SARS-CoV-2 Reference Genome NC_045512.2<br>Sulfolobus turreted icosahedral virus NC_005892 | (8961) | 8961        | 8970 | 8980 | 8990 | 9000 | 9010 | 9020 | 9030 | 9040 |   |
|                                                                                            | (8901) | G           | T    | G    | A    | C    | T    | T    | T    | T    | T |
|                                                                                            | (5226) | A           | T    | A    | A    | T    | T    | T    | T    | T    | T |
|                                                                                            | (5226) | A           | T    | A    | A    | T    | T    | T    | T    | T    | T |
|                                                                                            |        | Section 114 |      |      |      |      |      |      |      |      |   |
| SARS-CoV-2 Reference Genome NC_045512.2<br>Sulfolobus turreted icosahedral virus NC_005892 | (9041) | 9041        | 9050 | 9060 | 9070 | 9080 | 9090 | 9100 | 9110 | 9120 |   |
|                                                                                            | (8980) | C           | A    | --   | C    | T    | G    | A    | C    | T    | T |
|                                                                                            | (5304) | C           | A    | A    | G    | T    | T    | G    | A    | C    | T |
|                                                                                            | (5304) | C           | A    | A    | G    | T    | T    | G    | A    | C    | T |
|                                                                                            |        | Section 115 |      |      |      |      |      |      |      |      |   |
| SARS-CoV-2 Reference Genome NC_045512.2<br>Sulfolobus turreted icosahedral virus NC_005892 | (9121) | 9121        | 9130 | 9140 | 9150 | 9160 | 9170 | 9180 | 9190 | 9200 |   |
|                                                                                            | (9057) | C           | A    | T    | A    | T    | T    | G    | T    | A    | T |
|                                                                                            | (5384) | G           | A    | A    | T    | T    | C    | G    | T    | T    | T |
|                                                                                            | (5384) | G           | A    | A    | T    | T    | C    | G    | T    | T    | T |
|                                                                                            |        | Section 116 |      |      |      |      |      |      |      |      |   |
| SARS-CoV-2 Reference Genome NC_045512.2<br>Sulfolobus turreted icosahedral virus NC_005892 | (9201) | 9201        | 9210 | 9220 | 9230 | 9240 | 9250 | 9260 | 9270 | 9280 |   |
|                                                                                            | (9135) | T           | G    | A    | T    | G    | C    | T    | A    | T    | T |
|                                                                                            | (5457) | C           | G    | A    | G    | A    | C    | T    | A    | A    | G |
|                                                                                            | (5457) | C           | G    | A    | G    | A    | C    | T    | A    | A    | G |
|                                                                                            |        | Section 117 |      |      |      |      |      |      |      |      |   |
| SARS-CoV-2 Reference Genome NC_045512.2<br>Sulfolobus turreted icosahedral virus NC_005892 | (9281) | 9281        | 9290 | 9300 | 9310 | 9320 | 9330 | 9340 | 9350 | 9360 |   |
|                                                                                            | (9215) | T           | G    | T    | A    | G    | G    | C    | A    | C    | T |
|                                                                                            | (5532) | C           | G    | T    | A    | C    | C    | A    | A    | T    | T |
|                                                                                            | (5532) | C           | G    | T    | A    | C    | C    | A    | A    | T    | T |
|                                                                                            |        | Section 118 |      |      |      |      |      |      |      |      |   |
| SARS-CoV-2 Reference Genome NC_045512.2<br>Sulfolobus turreted icosahedral virus NC_005892 | (9361) | 9361        | 9370 | 9380 | 9390 | 9400 | 9410 | 9420 | 9430 | 9440 |   |
|                                                                                            | (9295) | --          | T    | T    | A    | C    | A    | G    | A    | T    | C |
|                                                                                            | (5601) | G           | C    | T    | G    | A    | A    | G    | G    | A    | C |
|                                                                                            | (5601) | G           | C    | T    | G    | A    | A    | G    | G    | A    | C |
|                                                                                            |        | Section 119 |      |      |      |      |      |      |      |      |   |
| SARS-CoV-2 Reference Genome NC_045512.2<br>Sulfolobus turreted icosahedral virus NC_005892 | (9441) | 9441        | 9450 | 9460 | 9470 | 9480 | 9490 | 9500 | 9510 | 9520 |   |
|                                                                                            | (9373) | A           | C    | C    | T    | A    | T    | T    | G    | G    | T |
|                                                                                            | (5674) | A           | A    | C    | T    | A    | T    | T    | G    | G    | T |
|                                                                                            | (5674) | A           | A    | C    | T    | A    | T    | T    | G    | G    | T |

SARS-CoV-2 & Sulfolobus turreted icosahedral virus.apr

|                                                                                            |         |                     |               |                  |                     |              |              |            |            |              |                  |
|--------------------------------------------------------------------------------------------|---------|---------------------|---------------|------------------|---------------------|--------------|--------------|------------|------------|--------------|------------------|
|                                                                                            |         | Section 120         |               |                  |                     |              |              |            |            |              |                  |
| SARS-CoV-2 Reference Genome NC_045512.2<br>Sulfolobus turreted icosahedral virus NC_005892 | (9521)  | 9521                | 9530          | 9540             | 9550                | 9560         | 9570         | 9580       | 9590       | 9600         |                  |
|                                                                                            | (9453)  | ATTTTATGAGGTTT      | TAGAAAGAGCTTT | TGGTGAAACAGTCATG | TAGTTGCCTTTAATACTTT | ACTATTCTATGT | CATTCT       |            |            |              |                  |
|                                                                                            | (5743)  | TAAATAATAGCATA      | ACGACACATC    | ---AACAG-GCAAT   | TAGGTC              | AAATACTGAC   | AATCGG       | CAGTACAA   | CAATG      |              |                  |
|                                                                                            |         | Section 121         |               |                  |                     |              |              |            |            |              |                  |
| SARS-CoV-2 Reference Genome NC_045512.2<br>Sulfolobus turreted icosahedral virus NC_005892 | (9601)  | 9601                | 9610          | 9620             | 9630                | 9640         | 9650         | 9660       | 9670       | 9680         |                  |
|                                                                                            | (9533)  | ACTGTACTCTGTTT      | ACACCAGTTT    | ACTCATCTTACC     | TGGTGTTTATCTGTT     | ATTTACTTGT   | ACTTGAC      | ATTTTATCT  |            |              |                  |
|                                                                                            | (5818)  | ACTTTTAACTACAG      | ACAGGAGAGA    | ATAAATTTCC       | AGTT-----           | ATCGCGGA     | ---ACACAA    | TAACG      | ---AATCTGA | CT           |                  |
|                                                                                            |         | Section 122         |               |                  |                     |              |              |            |            |              |                  |
| SARS-CoV-2 Reference Genome NC_045512.2<br>Sulfolobus turreted icosahedral virus NC_005892 | (9681)  | 9681                | 9690          | 9700             | 9710                | 9720         | 9730         | 9740       | 9750       | 9760         |                  |
|                                                                                            | (9613)  | TACTAATGATGTT       | TCTTTT        | TTAGCACATATTC    | AGTGATG             | GTATG        | TTCACACCT    | TTAGTACCTT | TCTGGAT    | AACAATTG     |                  |
|                                                                                            | (5887)  | TTAACAGCTCGT        | CAGCAA        | TATTATATATGA     | AGAG-----           | GTGATAT      | AATGAGTG     | TTAC       | TACATTG    | ---GGA       | CAAGTTT          |
|                                                                                            |         | Section 123         |               |                  |                     |              |              |            |            |              |                  |
| SARS-CoV-2 Reference Genome NC_045512.2<br>Sulfolobus turreted icosahedral virus NC_005892 | (9761)  | 9761                | 9770          | 9780             | 9790                | 9800         | 9810         | 9820       | 9830       | 9840         |                  |
|                                                                                            | (9693)  | C-----T             | TATATCATTTGT  | ATTTCCACAAAGCA   | TTTC                | TATTGGTTC    | TTTAGTA      | TTACCTTAA  | AGAGCG     | TGTAGTCTTT   |                  |
|                                                                                            | (5961)  | CAGCTAA             | TGCAAAAGTGAA  | ATATTTACT        | CAAAAC              | TTTCAGAG     | -----        | AAGCAAG    | ATTAG      | CGCGTTTGTAA  | AC---            |
|                                                                                            |         | Section 124         |               |                  |                     |              |              |            |            |              |                  |
| SARS-CoV-2 Reference Genome NC_045512.2<br>Sulfolobus turreted icosahedral virus NC_005892 | (9841)  | 9841                | 9850          | 9860             | 9870                | 9880         | 9890         | 9900       | 9910       | 9920         |                  |
|                                                                                            | (9767)  | AATGGTGTTCCTTT      | AGTACTTTTGA   | AGAAAGCTGCGC     | TGTGCACCT           | TTTGT        | TAAATA       | AGAAA      | TGTA       | TCTAAGTTGCG  |                  |
|                                                                                            | (6030)  | AGTATATTTGTAGGG     | AGCTATAAATT   | A-AAACAAATA      | T                   | CGTATTTA     | TTGTATGGG    | ACACAAA    | ATAG       | TCTCAGCTCCAG |                  |
|                                                                                            |         | Section 125         |               |                  |                     |              |              |            |            |              |                  |
| SARS-CoV-2 Reference Genome NC_045512.2<br>Sulfolobus turreted icosahedral virus NC_005892 | (9921)  | 9921                | 9930          | 9940             | 9950                | 9960         | 9970         | 9980       | 9990       | 10000        |                  |
|                                                                                            | (9847)  | TAGTGATGTGCTATTACCT | CTTACGC       | AAATATATAGAT     | ACTT                | AGCTCTT      | TATAATAAGTAC | AGTATTT    | TAGTG      | GAGCAA       |                  |
|                                                                                            | (6109)  | TCGTGCCTTTGGGGCCAA  | CGCATCA       | ATATATATAGACG    | AGCT---             | TCAAGAGG     | ACTA--       | TATTTA     | ATTCGT---  |              |                  |
|                                                                                            |         | Section 126         |               |                  |                     |              |              |            |            |              |                  |
| SARS-CoV-2 Reference Genome NC_045512.2<br>Sulfolobus turreted icosahedral virus NC_005892 | (10001) | 10001               | 10010         | 10020            | 10030               | 10040        | 10050        | 10060      | 10070      | 10080        |                  |
|                                                                                            | (9927)  | TGGATACAACTAGC      | TACAGAG       | AAAGCTGC         | TTGT                | TGTCA        | TCTCGCA      | AGGCTCT    | CAATGA     | CTTCA        | GTAACTCAGGTCTGAT |
|                                                                                            | (6180)  | ---ATAAAAGTATA      | TATAACA       | AAATTCAT         | TTTC                | TGTCA        | CAGTAAC      | ACCATTT    | TCAATA     | ----ATAA     | TAATAACAATGACAT  |

SARS-CoV-2 & Sulfolobus turreted icosahedral virus.apr

|                                                 |         |                                                                                       |       |       |       |       |       |       |       |       |       |
|-------------------------------------------------|---------|---------------------------------------------------------------------------------------|-------|-------|-------|-------|-------|-------|-------|-------|-------|
|                                                 |         | Section 127                                                                           |       |       |       |       |       |       |       |       |       |
|                                                 |         | (10081)                                                                               | 10081 | 10090 | 10100 | 10110 | 10120 | 10130 | 10140 | 10150 | 10160 |
| SARS-CoV-2 Reference Genome NC_045512.2         | (10007) | GTTCTTTACCAACCAACCAAAACCCTATCACCTCAGCTGTTTGCAGAGTGGTTTTAGAAAATGGCATTCCCATCTGG         |       |       |       |       |       |       |       |       |       |
| Sulfolobus turreted icosahedral virus NC_005892 | (6253)  | ATTCTATTGGAGCAAAATTCAAGAGTCGAG-ATTTATGATATATTACAAAGAACCAAGGAAATATC-TATTACATTCAGC      |       |       |       |       |       |       |       |       |       |
|                                                 |         | Section 128                                                                           |       |       |       |       |       |       |       |       |       |
|                                                 |         | (10161)                                                                               | 10161 | 10170 | 10180 | 10190 | 10200 | 10210 | 10220 | 10230 | 10240 |
| SARS-CoV-2 Reference Genome NC_045512.2         | (10087) | TAAAGTTGAGGGTTGTATGGTACAAGTAACCTTGTGGTACAACTACACTTAACGGTCCTTGGCTTGATGACGTAG--TTTA     |       |       |       |       |       |       |       |       |       |
| Sulfolobus turreted icosahedral virus NC_005892 | (6331)  | TTCCTCCCGGTTTAGCAA--TACTAG-----AATTCTCGTTAGAGAGAGTFTTCGAAAAAGGAATAGAAATT-A            |       |       |       |       |       |       |       |       |       |
|                                                 |         | Section 129                                                                           |       |       |       |       |       |       |       |       |       |
|                                                 |         | (10241)                                                                               | 10241 | 10250 | 10260 | 10270 | 10280 | 10290 | 10300 | 10310 | 10320 |
| SARS-CoV-2 Reference Genome NC_045512.2         | (10165) | CTGTCCAAGACATGTGATCTGCACCTCTGAAAGACATGCTTAACTTAAATTAAGAAGATTTACTCATTCGTAAGTCTAATC     |       |       |       |       |       |       |       |       |       |
| Sulfolobus turreted icosahedral virus NC_005892 | (6397)  | ATATTCCAATAATTATTCAACAAGCGGAATGGATATAFAAGTTTCGATAGAAGAGAGGGAAGCTT-----ATGCAATA        |       |       |       |       |       |       |       |       |       |
|                                                 |         | Section 130                                                                           |       |       |       |       |       |       |       |       |       |
|                                                 |         | (10321)                                                                               | 10321 | 10330 | 10340 | 10350 | 10360 | 10370 | 10380 | 10390 | 10400 |
| SARS-CoV-2 Reference Genome NC_045512.2         | (10245) | ATAATTTCTTGGTACAGGCTGGTAATGTTCAACTCAAGGTTATTTGGACAATCTATGCAAATTTGTGTACTTAAGCTTAAG     |       |       |       |       |       |       |       |       |       |
| Sulfolobus turreted icosahedral virus NC_005892 | (6471)  | AAAATGCTT--ACAGTTATAATA-ATACTACTTCACTA-CCTTTACA---ATTTTCAATTCGGGACT--ATATCAAC         |       |       |       |       |       |       |       |       |       |
|                                                 |         | Section 131                                                                           |       |       |       |       |       |       |       |       |       |
|                                                 |         | (10401)                                                                               | 10401 | 10410 | 10420 | 10430 | 10440 | 10450 | 10460 | 10470 | 10480 |
| SARS-CoV-2 Reference Genome NC_045512.2         | (10325) | GT-TGATACAGCCAAATCCTAAGACACCTAAGTATAAGTTTGTTGCATTCAAACAGGACAGACTTTTTCAGTGTAGCTT       |       |       |       |       |       |       |       |       |       |
| Sulfolobus turreted icosahedral virus NC_005892 | (6542)  | TCTGTAGCTA-CATCCATTGGTAAATAAGTTCGATACCAG-CTAATGGAAAGCGTTAGGAACTTTCTTAGGTT---TA        |       |       |       |       |       |       |       |       |       |
|                                                 |         | Section 132                                                                           |       |       |       |       |       |       |       |       |       |
|                                                 |         | (10481)                                                                               | 10481 | 10490 | 10500 | 10510 | 10520 | 10530 | 10540 | 10550 | 10560 |
| SARS-CoV-2 Reference Genome NC_045512.2         | (10404) | GTTAACAATGGTTTACCATCTGGTGTTTTACCAGTGTGCTATGAGGGCCAAATTTCACTATTAAAGGTTTCACTCTCTTAATGGT |       |       |       |       |       |       |       |       |       |
| Sulfolobus turreted icosahedral virus NC_005892 | (6617)  | TTTAAAGATTACGGGCATATATGAAGATGTAAAGTTTAGTGTGACATACGGTGGTGGTTTAGGCGT--TCCTTTTACATT      |       |       |       |       |       |       |       |       |       |
|                                                 |         | Section 133                                                                           |       |       |       |       |       |       |       |       |       |
|                                                 |         | (10561)                                                                               | 10561 | 10570 | 10580 | 10590 | 10600 | 10610 | 10620 | 10630 | 10640 |
| SARS-CoV-2 Reference Genome NC_045512.2         | (10484) | TCATGTGGTAGTGTTGGTTTAAACATAGATTATGACTGTGTCTCTTTTGTGTACATGCACCATATGGAAATACCAACTGG      |       |       |       |       |       |       |       |       |       |
| Sulfolobus turreted icosahedral virus NC_005892 | (6695)  | TGGACTGGAGTAGAAGAAATAATGAGTTAGTG-----GAAAAATCTAATTTCGTAACTCAAAGCGTAACCTCTCAGT         |       |       |       |       |       |       |       |       |       |

SARS-CoV-2 & Sulfolobus turreted icosahedral virus.apr

|                                                 |         |             |       |       |       |        |        |       |       |        |        |
|-------------------------------------------------|---------|-------------|-------|-------|-------|--------|--------|-------|-------|--------|--------|
|                                                 |         | Section 134 |       |       |       |        |        |       |       |        |        |
|                                                 | (10641) | 10641       | 10650 | 10660 | 10670 | 10680  | 10690  | 10700 | 10710 | 10720  |        |
| SARS-CoV-2 Reference Genome NC_045512.2         | (10564) | A           | GTT   | CAT   | GC    | TGG    | CACA   | GAG   | CTTA  | GAA    | AGGT   |
| Sulfolobus turreted icosahedral virus NC_005892 | (6768)  | G           | GTT   | C     | TCA   | AGTAA  | CTCA   | AGATA | CTA   | ---    | AAC    |
|                                                 |         | Section 135 |       |       |       |        |        |       |       |        |        |
|                                                 | (10721) | 10721       | 10730 | 10740 | 10750 | 10760  | 10770  | 10780 | 10790 | 10800  |        |
| SARS-CoV-2 Reference Genome NC_045512.2         | (10642) | G           | GAC   | ACA   | AAC   | TAT    | TAC    | AGT   | TAA   | TG     | TTT    |
| Sulfolobus turreted icosahedral virus NC_005892 | (6845)  | C           | GGG   | CTAAC | CACT  | GCG    | CTAA   | --CT  | CAGT  | G      | TCAG   |
|                                                 |         | Section 136 |       |       |       |        |        |       |       |        |        |
|                                                 | (10801) | 10801       | 10810 | 10820 | 10830 | 10840  | 10850  | 10860 | 10870 | 10880  |        |
| SARS-CoV-2 Reference Genome NC_045512.2         | (10722) | TTAC        | CA    | CA    | ACT   | CTTA   | ATGACT | TTAA  | CTTGT | GGCT   | ATGA   |
| Sulfolobus turreted icosahedral virus NC_005892 | (6911)  | --TT        | CA    | CA    | AGT   | A--TGG | GACTT  | CAT   | AGCA  | GGGG   | --AAGT |
|                                                 |         | Section 137 |       |       |       |        |        |       |       |        |        |
|                                                 | (10881) | 10881       | 10890 | 10900 | 10910 | 10920  | 10930  | 10940 | 10950 | 10960  |        |
| SARS-CoV-2 Reference Genome NC_045512.2         | (10802) | C           | TAG   | GAC   | CTC   | TTCT   | GTG    | CTCAA | ACTG  | GA     | ATTG   |
| Sulfolobus turreted icosahedral virus NC_005892 | (6984)  | A           | TTCA  | GC    | TGG   | TAG    | CAAA   | TGGT  | GTTCA | TCAA   | CATCA  |
|                                                 |         | Section 138 |       |       |       |        |        |       |       |        |        |
|                                                 | (10961) | 10961       | 10970 | 10980 | 10990 | 11000  | 11010  | 11020 | 11030 | 11040  |        |
| SARS-CoV-2 Reference Genome NC_045512.2         | (10882) | GAA         | TGG   | AC    | G     | TAC    | CA     | CTTT  | TAT   | GTG    | TTG    |
| Sulfolobus turreted icosahedral virus NC_005892 | (7064)  | AGA         | AACT  | AG    | CTA   | --ATT  | TTCCCC | CGTAC | CCCC  | CGGCGG | --GAAT |
|                                                 |         | Section 139 |       |       |       |        |        |       |       |        |        |
|                                                 | (11041) | 11041       | 11050 | 11060 | 11070 | 11080  | 11090  | 11100 | 11110 | 11120  |        |
| SARS-CoV-2 Reference Genome NC_045512.2         | (10961) | G           | T     | TAC   | TT    | TCC    | AAAGT  | G     | CAGT  | G      | AAAA   |
| Sulfolobus turreted icosahedral virus NC_005892 | (7138)  | G           | ATTA  | TT    | GC    | ----   | G      | ATT   | TAAAA | ATAC   | TG     |
|                                                 |         | Section 140 |       |       |       |        |        |       |       |        |        |
|                                                 | (11121) | 11121       | 11130 | 11140 | 11150 | 11160  | 11170  | 11180 | 11190 | 11200  |        |
| SARS-CoV-2 Reference Genome NC_045512.2         | (11041) | A           | G     | TTT   | TTAG  | TCC    | AGA    | GTA   | CTC   | --AA   | TGG    |
| Sulfolobus turreted icosahedral virus NC_005892 | (7210)  | T           | GAA   | TTAG  | GA    | ATAC   | GTA    | ATT   | AA    | GGG    | GAT    |

SARS-CoV-2 & Sulfolobus turreted icosahedral virus.apr

|                                                 |         |             |       |       |       |       |           |       |        |       |      |        |         |        |        |        |       |        |        |          |          |      |      |       |       |       |     |     |      |      |     |      |     |
|-------------------------------------------------|---------|-------------|-------|-------|-------|-------|-----------|-------|--------|-------|------|--------|---------|--------|--------|--------|-------|--------|--------|----------|----------|------|------|-------|-------|-------|-----|-----|------|------|-----|------|-----|
|                                                 |         | Section 141 |       |       |       |       |           |       |        |       |      |        |         |        |        |        |       |        |        |          |          |      |      |       |       |       |     |     |      |      |     |      |     |
|                                                 | (11201) | 11201       | 11210 | 11220 | 11230 | 11240 | 11250     | 11260 | 11270  | 11280 |      |        |         |        |        |        |       |        |        |          |          |      |      |       |       |       |     |     |      |      |     |      |     |
| SARS-CoV-2 Reference Genome NC_045512.2         | (11117) | AT          | TA    | TTGCT | ATGTC | TG    | CTTTTGCAA | TGAT  | GTTT   | GT    | CAAA | CAT    | AAG     | CATG   | CAT    | TTC    | TCTGT | TTGTTT | TTG    | TTACCTTC | TCT      |      |      |       |       |       |     |     |      |      |     |      |     |
| Sulfolobus turreted icosahedral virus NC_005892 | (7290)  | TC          | TA    | AGTTA | AAACG | TG    | GAAAGTTTC | TGA   | AGTT   | --    | CAT  | TT     | CT      | T--C   | CATG   | AA     | TCT   | TTCAA  | TTATT  | GTTG     | GATTGCGG | TGA  |      |       |       |       |     |     |      |      |     |      |     |
|                                                 |         | Section 142 |       |       |       |       |           |       |        |       |      |        |         |        |        |        |       |        |        |          |          |      |      |       |       |       |     |     |      |      |     |      |     |
|                                                 | (11281) | 11281       | 11290 | 11300 | 11310 | 11320 | 11330     | 11340 | 11350  | 11360 |      |        |         |        |        |        |       |        |        |          |          |      |      |       |       |       |     |     |      |      |     |      |     |
| SARS-CoV-2 Reference Genome NC_045512.2         | (11197) | TGC         | CACTG | TAGCT | TATT  | TTAA  | TAT       | GGTC  | TATAT  | GC    | CTGC | TAGTT  | GGGTGAT | GC     | GAT    | TA     | ---   | T---   | GAC    | ATG      | GTT      | GG   | A    | T     |       |       |     |     |      |      |     |      |     |
| Sulfolobus turreted icosahedral virus NC_005892 | (7366)  | AAA         | CACTG | AAATA | TATT  | CA    | AA        | ATG   | GGGG   | TATAT | --   | CAGC   | CAGCC   | G      | AAACCA | GC     | CGTC  | TA     | GTAT   | TTGGA    | AA       | AT   | AGTT | TC    | AAT   |       |     |     |      |      |     |      |     |
|                                                 |         | Section 143 |       |       |       |       |           |       |        |       |      |        |         |        |        |        |       |        |        |          |          |      |      |       |       |       |     |     |      |      |     |      |     |
|                                                 | (11361) | 11361       | 11370 | 11380 | 11390 | 11400 | 11410     | 11420 | 11430  | 11440 |      |        |         |        |        |        |       |        |        |          |          |      |      |       |       |       |     |     |      |      |     |      |     |
| SARS-CoV-2 Reference Genome NC_045512.2         | (11270) | A           | TGGT  | TGAT  | TACT  | AGTTT | GTCT      | GGTT  | TTA    | AGCT  | AAA  | AG     | AC      | TGTGT  | TAT    | GT     | AT    | GCAT   | CAGCTG | TAGTGTT  | ACT      | AATC | TT   | A     | T     |       |     |     |      |      |     |      |     |
| Sulfolobus turreted icosahedral virus NC_005892 | (7444)  | T           | TATC  | TTG   | TGAT  | TGGGG | GAGG      | GGTT  | --     | G     | ACTG | AAA    | GT      | AT     | TCACG  | TTT    | --    | ATTTTA | CAA    | --       | TT       | CAGC | --   | AGG   | AG    | ATAG  | AA  |     |      |      |     |      |     |
|                                                 |         | Section 144 |       |       |       |       |           |       |        |       |      |        |         |        |        |        |       |        |        |          |          |      |      |       |       |       |     |     |      |      |     |      |     |
|                                                 | (11441) | 11441       | 11450 | 11460 | 11470 | 11480 | 11490     | 11500 | 11510  | 11520 |      |        |         |        |        |        |       |        |        |          |          |      |      |       |       |       |     |     |      |      |     |      |     |
| SARS-CoV-2 Reference Genome NC_045512.2         | (11350) | G           | ACAGC | AAG   | AAC   | TGT   | TAT       | GA    | --     | TG    | GT   | GC     | -       | TAGGAG | AG     | TG     | TG    | GA     | CAC    | TT       | AT       | GA   | AT   | GT    | CT    | TG    | AC  | -   | TC   | GTT  | TAT | AAA  |     |
| Sulfolobus turreted icosahedral virus NC_005892 | (7516)  | A           | ATTCA | AAAA  | -     | G     | TAT       | T     | GGAA   | A     | G    | GGC    | TG      | AG     | GCT    | TTTTCT | AG    | GA     | TG     | TA       | ACACA    | AT   | AAAT | ---   | TGA   | AA    | AG  | TC  | ACG  | TA   | AAA |      |     |
|                                                 |         | Section 145 |       |       |       |       |           |       |        |       |      |        |         |        |        |        |       |        |        |          |          |      |      |       |       |       |     |     |      |      |     |      |     |
|                                                 | (11521) | 11521       | 11530 | 11540 | 11550 | 11560 | 11570     | 11580 | 11590  | 11600 |      |        |         |        |        |        |       |        |        |          |          |      |      |       |       |       |     |     |      |      |     |      |     |
| SARS-CoV-2 Reference Genome NC_045512.2         | (11426) | G           | TTTAT | TAT   | GGTAA | TG    | CTT       | AT    | AGATC  | AAGCC | ATT  | CCA    | TGTG    | GGC    | TCTT   | AT     | TAAT  | CTCT   | GTTACT | TCT      | AAC      | T    | ACT  | CAG   | G     | TGT   |     |     |      |      |     |      |     |
| Sulfolobus turreted icosahedral virus NC_005892 | (7590)  | G           | CACG  | T     | CAT   | TTACG | TG        | T     | AC     | AA    | ATC  | G      | ATTTT   | TT     | G      | CCA    | ---   | A      | GG     | T        | CTT      | G    | T    | ----- | GTTAC | AT    | TC  | ATG | T    | -    | TA  | CACG | --- |
|                                                 |         | Section 146 |       |       |       |       |           |       |        |       |      |        |         |        |        |        |       |        |        |          |          |      |      |       |       |       |     |     |      |      |     |      |     |
|                                                 | (11601) | 11601       | 11610 | 11620 | 11630 | 11640 | 11650     | 11660 | 11670  | 11680 |      |        |         |        |        |        |       |        |        |          |          |      |      |       |       |       |     |     |      |      |     |      |     |
| SARS-CoV-2 Reference Genome NC_045512.2         | (11506) | A           | GTT   | ACAA  | TGT   | CA    | TGTTTTT   | TGGCC | AG     | AG    | GTA  | TTGTTT | T       | TAT    | G      | TGTGT  | TGA   | GT     | AT     | TGC      | CCT      | ATT  | TT   | CTT   | CA    | TAA   | CT  | G   | GTA  |      |     |      |     |
| Sulfolobus turreted icosahedral virus NC_005892 | (7656)  | -           | G     | TAA   | AAAT  | TGT   | AA        | -     | CGACC  | ACAA  | AA   | AT     | GTA     | ACACAA | TACA   | G      | CTAC  | AAA    | AA     | TGT      | GGC      | ATA  | AC   | ATT   | TTT   | AA    | CA  | T   | CAG  | ACT  |     |      |     |
|                                                 |         | Section 147 |       |       |       |       |           |       |        |       |      |        |         |        |        |        |       |        |        |          |          |      |      |       |       |       |     |     |      |      |     |      |     |
|                                                 | (11681) | 11681       | 11690 | 11700 | 11710 | 11720 | 11730     | 11740 | 11750  | 11760 |      |        |         |        |        |        |       |        |        |          |          |      |      |       |       |       |     |     |      |      |     |      |     |
| SARS-CoV-2 Reference Genome NC_045512.2         | (11586) | A           | TAC   | ACTT  | CA    | GT    | GTATA     | TG    | CTAG   | TT    | AT   | TGT    | TTCT    | TA     | GGCT   | A      | TTTTT | G      | T      | ACTT     | G        | TTA  | CT   | TT    | GGC   | T     | CTT | TT  | GTTT | A    | CTC |      |     |
| Sulfolobus turreted icosahedral virus NC_005892 | (7734)  | C           | TA    | -     | AGTTA | -     | GAGTATA   | -     | TGAGGA | TAA   | AT   | GTA    | TATC    | TA     | AAATA  | A      | GAAA  | -      | G      | AA       | GAA      | G    | AGAA | TT    | AAAC  | AAGAT | TT  | TGC | -    | AAAA |     |      |     |

SARS-CoV-2 & Sulfolobus turreted icosahedral virus.apr

|                                                 |         |              |            |             |            |            |            |            |            |                  |              |
|-------------------------------------------------|---------|--------------|------------|-------------|------------|------------|------------|------------|------------|------------------|--------------|
|                                                 |         | Section 148  |            |             |            |            |            |            |            |                  |              |
|                                                 | (11761) | 11761        | 11770      | 11780       | 11790      | 11800      | 11810      | 11820      | 11830      | 11840            |              |
| SARS-CoV-2 Reference Genome NC_045512.2         | (11666) | AACCGCT      | ACTTTAGACT | GACT-CTTGGT | GTTTATGATT | ACTTAGTT   | CTACACAGG  | AGTTTAGAT  | TATATGAATT | CACAGG           |              |
| Sulfolobus turreted icosahedral virus NC_005892 | (7809)  | ATTTTAAATCAA | AAAGC      | GATG        | CATAAAG    | ATATTGAAG  | AATAT-GA   | GAATTGTGT  | AACAC      | TGATGAATT        | AATACT       |
|                                                 |         | Section 149  |            |             |            |            |            |            |            |                  |              |
|                                                 | (11841) | 11841        | 11850      | 11860       | 11870      | 11880      | 11890      | 11900      | 11910      | 11920            |              |
| SARS-CoV-2 Reference Genome NC_045512.2         | (11745) | GACTACT      | CCCA       | CCCAAGAA    | TAGCAT     | AGATGCCTTC | AAAC       | TCACACATTA | AATGT      | TTGGGTGTTTGGTGGC | AAACCTTGTATC |
| Sulfolobus turreted icosahedral virus NC_005892 | (7888)  | AACACT       | TTCTT      | CATTAGAA    | --GAA      | AGAT-AGACT | ATATTAG    | CAAGAAATAG | ACGGG      | CAA-----         | AAACATTTAAT  |
|                                                 |         | Section 150  |            |             |            |            |            |            |            |                  |              |
|                                                 | (11921) | 11921        | 11930      | 11940       | 11950      | 11960      | 11970      | 11980      | 11990      | 12000            |              |
| SARS-CoV-2 Reference Genome NC_045512.2         | (11825) | AAAGTAG      | CCACTGTAC  | AGTCT       | AAAAATGTCA | GATGTAAAG  | TGCACAT    | CAGTAGT    | CTTACTCT   | CAGTTTTT         | GCAACAAC     |
| Sulfolobus turreted icosahedral virus NC_005892 | (7958)  | AGAGT--CT    | AAGTTAG    | AGTTT       | AAATAGAG   | GGA        | TAAATG     | GGTAAG---  | GTATTC     | CTCAG-----       | GAA          |
|                                                 |         | Section 151  |            |             |            |            |            |            |            |                  |              |
|                                                 | (12001) | 12001        | 12010      | 12020       | 12030      | 12040      | 12050      | 12060      | 12070      | 12080            |              |
| SARS-CoV-2 Reference Genome NC_045512.2         | (11905) | AGTAGAATCAT  | CTATCTA    | AATTGTGGG   | CTCAATGTG  | TCCAGTT    | TACACAA    | -TGACAT    | TCTCTT     | AGCTA            | AGATTA       |
| Sulfolobus turreted icosahedral virus NC_005892 | (8026)  | CATAAATATG   | TAAAAG     | AATTC---    | CTACGACAA  | TACGATAGAT | TAAGTTAGAT | GA----     | AGAAGAC--  | TTCTGT           | TAA          |
|                                                 |         | Section 152  |            |             |            |            |            |            |            |                  |              |
|                                                 | (12081) | 12081        | 12090      | 12100       | 12110      | 12120      | 12130      | 12140      | 12150      | 12160            |              |
| SARS-CoV-2 Reference Genome NC_045512.2         | (11984) | GCCTTT       | GAAAAAAT   | GTTTCACT    | ACTTTC     | TGTTT      | TTGCTT     | TCATG      | CAGG       | GTGCTGTAGACAT    | TAACAAAG     |
| Sulfolobus turreted icosahedral virus NC_005892 | (8097)  | AGCTA-G      | AGTTAAG    | --CTCG      | -AAGATGG   | TACATTAA   | TTAA       | CGC-G      | -ATAG---   | GCATGAT          | TCAACAA      |
|                                                 |         | Section 153  |            |             |            |            |            |            |            |                  |              |
|                                                 | (12161) | 12161        | 12170      | 12180       | 12190      | 12200      | 12210      | 12220      | 12230      | 12240            |              |
| SARS-CoV-2 Reference Genome NC_045512.2         | (12064) | AATGCTGG     | ACAA       | CAGGG       | CAACCT     | TACAA      | GCTATAGCCT | CAGAGTT    | TAGTT      | CCCTTC-CAT       | CATATGC      |
| Sulfolobus turreted icosahedral virus NC_005892 | (8168)  | AATACGCTA    | -TGCGAA    | C           | TCAAC      | TACAA      | -----      | AAGAA      | CAGAGTT    | GAGGTTAAGATGA    | ATGAAGG      |
|                                                 |         | Section 154  |            |             |            |            |            |            |            |                  |              |
|                                                 | (12241) | 12241        | 12250      | 12260       | 12270      | 12280      | 12290      | 12300      | 12310      | 12320            |              |
| SARS-CoV-2 Reference Genome NC_045512.2         | (12143) | GCTCAAGA     | AGCTTAT    | GAGCA-      | GGCTGTT    | GCTAAT     | G          | GTGAT      | TTCTGA     | AGTTG            | TTC          |
| Sulfolobus turreted icosahedral virus NC_005892 | (8242)  | AAATAATGA    | TAAAGTCA   | GAGACT      | GGAA       | GAGGG      | AAAG       | CTGCT      | TTCTGA     | CAAAG            | AGATTAA      |

SARS-CoV-2 & Sulfolobus turreted icosahedral virus.apr

|                                                 |         |             |         |        |        |         |         |           |                                          |
|-------------------------------------------------|---------|-------------|---------|--------|--------|---------|---------|-----------|------------------------------------------|
|                                                 |         | Section 155 |         |        |        |         |         |           |                                          |
|                                                 | (12321) | 12321       | 12330   | 12340  | 12350  | 12360   | 12370   | 12380     | 12390 12400                              |
| SARS-CoV-2 Reference Genome NC_045512.2         | (12222) | TGGCTA      | AATCTGA | TTTGA  | CCGTG  | ATGCA   | GCCATGC | AACGTAA   | GTGGAA-AAGATGGCTGATCAAGCTATGACCCAAAT     |
| Sulfolobus turreted icosahedral virus NC_005892 | (8320)  | -----       | AATCTCA | -TTT   | TATG-A | GGTGTG  | GTG---- | ATG--AA   | AGTGGAAAGAAAGTAGATGA                     |
|                                                 |         | Section 156 |         |        |        |         |         |           |                                          |
|                                                 | (12401) | 12401       | 12410   | 12420  | 12430  | 12440   | 12450   | 12460     | 12470 12480                              |
| SARS-CoV-2 Reference Genome NC_045512.2         | (12301) | GTAT        | AAACAG  | GCTAG  | ATCTG  | AGGACA  | AGAGGGC | AAAAGTTAC | TAGTGCTATGACACAAATGCTT--TTCAC            |
| Sulfolobus turreted icosahedral virus NC_005892 | (8386)  | GAA         | GAAAGT  | AGATG  | AGATT  | TGCA    | GTAGAG  | TAACGTG   | CGAAGATTGCGTAGCTGAA--ATCTGCGGGAGATCTTTCG |
|                                                 |         | Section 157 |         |        |        |         |         |           |                                          |
|                                                 | (12481) | 12481       | 12490   | 12500  | 12510  | 12520   | 12530   | 12540     | 12550 12560                              |
| SARS-CoV-2 Reference Genome NC_045512.2         | (12379) | AAAG        | TTGGAT  | AAATG  | ATGCA  | CTCAACA | ACATT-- | ATCAACA   | ATGCAGAGATG-GTGTGTGTTCCCTTGAA            |
| Sulfolobus turreted icosahedral virus NC_005892 | (8461)  | ATCC        | TTTGTG  | AAAGAG | -A     | ACAGG   | ACCTTA  | ATGGAGG   | AGGTGGAATAAGATGAGTGAAGCTGAAGT            |
|                                                 |         | Section 158 |         |        |        |         |         |           |                                          |
|                                                 | (12561) | 12561       | 12570   | 12580  | 12590  | 12600   | 12610   | 12620     | 12630 12640                              |
| SARS-CoV-2 Reference Genome NC_045512.2         | (12457) | TACAA       | CAGCAG  | CCAACT | AATGG  | TTGTCA  | TACCA   | GACTAT    | AAACA                                    |
| Sulfolobus turreted icosahedral virus NC_005892 | (8540)  | ATCAA       | TGAAAG  | ATAAA  | GAACT  | AGTAG   | CA      | GATCT     | GATA----CGATCGCATATAA                    |
|                                                 |         | Section 159 |         |        |        |         |         |           |                                          |
|                                                 | (12641) | 12641       | 12650   | 12660  | 12670  | 12680   | 12690   | 12700     | 12710 12720                              |
| SARS-CoV-2 Reference Genome NC_045512.2         | (12537) | ATGC        | ATCAGC  | ATTGT  | GGGA   | AATCCA  | ACAGGT  | TGTAG     | GATGCAGATAGTAAAT                         |
| Sulfolobus turreted icosahedral virus NC_005892 | (8616)  | ATAA        | TGGCAA  | AGCTA  | GGGAT  | GA      | CTATAG  | G--TGAG   | GGGAAAGTAAACGC                           |
|                                                 |         | Section 160 |         |        |        |         |         |           |                                          |
|                                                 | (12721) | 12721       | 12730   | 12740  | 12750  | 12760   | 12770   | 12780     | 12790 12800                              |
| SARS-CoV-2 Reference Genome NC_045512.2         | (12617) | AAAT        | CACCTA  | ATTTAG | CATGG  | CTCT    | TTATT   | GTAAC     | AGCTTTAAAGGCCAAT                         |
| Sulfolobus turreted icosahedral virus NC_005892 | (8693)  | AA          | GAGGGT  | TAGT   | GTTT   | CAAAA   | CATC    | GGAGG     | GATATAA                                  |
|                                                 |         | Section 161 |         |        |        |         |         |           |                                          |
|                                                 | (12801) | 12801       | 12810   | 12820  | 12830  | 12840   | 12850   | 12860     | 12870 12880                              |
| SARS-CoV-2 Reference Genome NC_045512.2         | (12696) | TTAG        | TCCTGT  | TGCA   | ACTACG | ACAGAT  | GTCTT   | GTGCT     | GCGGTACTACACAA                           |
| Sulfolobus turreted icosahedral virus NC_005892 | (8771)  | TAA         | TTGAAT  | GAAATA | AGAA   | ATAGAA  | --CTAG  | CTCAGC    | ----AGATATGATAGTAT                       |

SARS-CoV-2 & Sulfolobus turreted icosahedral virus.apr

|                                                 |         |              |        |        |         |       |          |        |       |          |                |
|-------------------------------------------------|---------|--------------|--------|--------|---------|-------|----------|--------|-------|----------|----------------|
|                                                 |         | Section 162  |        |        |         |       |          |        |       |          |                |
|                                                 | (12881) | 12881        | 12890  | 12900  | 12910   | 12920 | 12930    | 12940  | 12950 | 12960    |                |
| SARS-CoV-2 Reference Genome NC_045512.2         | (12776) | TACTACAAC    | ACAA   | AAAG   | GGAGG   | TAG   | GT       | TGT    | AA    | CTTGCACT | GT             |
| Sulfolobus turreted icosahedral virus NC_005892 | (8842)  | AACAAATG     | AGAA   | AAAG   | ATTAA   | TTT   | GT       | ATA    | ATG   | CTATTG   | CGGATATC       |
|                                                 |         | Section 163  |        |        |         |       |          |        |       |          |                |
|                                                 | (12961) | 12961        | 12970  | 12980  | 12990   | 13000 | 13010    | 13020  | 13030 | 13040    |                |
| SARS-CoV-2 Reference Genome NC_045512.2         | (12850) | ATTCCCTAAGAG | TGAT   | GAA    | CTGGTAC | TATC  | TATAC    | AGA    | ACTG  | GAA      | CC             |
| Sulfolobus turreted icosahedral virus NC_005892 | (8922)  | TTACAG       | AAGCAT | TAT    | GAA     | GAGT  | T        | TGAGG  | AGA   | TAAA     | GAA            |
|                                                 |         | Section 164  |        |        |         |       |          |        |       |          |                |
|                                                 | (13041) | 13041        | 13050  | 13060  | 13070   | 13080 | 13090    | 13100  | 13110 | 13120    |                |
| SARS-CoV-2 Reference Genome NC_045512.2         | (12930) | GTCC         | AAAG   | TGAAGT | ATT     | TATAC | TTTATTAA | AGGAT  | TAA   | AC       | AA             |
| Sulfolobus turreted icosahedral virus NC_005892 | (8998)  | GAGAG        | AAAG   | AGTGT  | ATT     | GAT   | TAATAAGG | AGG    | CG    | TT       | AGGA           |
|                                                 |         | Section 165  |        |        |         |       |          |        |       |          |                |
|                                                 | (13121) | 13121        | 13130  | 13140  | 13150   | 13160 | 13170    | 13180  | 13190 | 13200    |                |
| SARS-CoV-2 Reference Genome NC_045512.2         | (13010) | ACAGT        | ACGTCT | ACAAGC | TG      | GTA   | ATGC     | AA     | CAGAA | GTG      | CCT            |
| Sulfolobus turreted icosahedral virus NC_005892 | (9071)  | C            | AGT    | TAAATA | AGAAGC  | AA    | GCT      | ATA    | AA    | AT       | ATGATC         |
|                                                 |         | Section 166  |        |        |         |       |          |        |       |          |                |
|                                                 | (13201) | 13201        | 13210  | 13220  | 13230   | 13240 | 13250    | 13260  | 13270 | 13280    |                |
| SARS-CoV-2 Reference Genome NC_045512.2         | (13090) | TGCT         | TGCT   | TAAAGC | TACAA   | AAGAT | TATCT    | AGCTAG | TGGG  | GG       | ACAACCAATCACTA |
| Sulfolobus turreted icosahedral virus NC_005892 | (9145)  | TTAT         | TGTT   | CAATA  | TAAT    | ATCCG | TCTG     | AT     | CTAT  | TAAA     | GGT            |
|                                                 |         | Section 167  |        |        |         |       |          |        |       |          |                |
|                                                 | (13281) | 13281        | 13290  | 13300  | 13310   | 13320 | 13330    | 13340  | 13350 | 13360    |                |
| SARS-CoV-2 Reference Genome NC_045512.2         | (13170) | CTGT         | GTACT  | TGGT   | CAGGCA  | AT    | ACAGTTAC | ACCG   | GAA   | GC       | CAATAT         |
| Sulfolobus turreted icosahedral virus NC_005892 | (9211)  | TGT          | GGAAT  | ---    | CGATTG  | ATT   | ACGTAATT | ACAG   | AAAT  | CA       | CAATAT         |
|                                                 |         | Section 168  |        |        |         |       |          |        |       |          |                |
|                                                 | (13361) | 13361        | 13370  | 13380  | 13390   | 13400 | 13410    | 13420  | 13430 | 13440    |                |
| SARS-CoV-2 Reference Genome NC_045512.2         | (13249) | GTACTGCC     | GT     | TGCC   | ACAT    | AG    | ATCATC   | CAA    | ATCC  | TAAA     | GAT            |
| Sulfolobus turreted icosahedral virus NC_005892 | (9287)  | AATGGATT     | GATAT  | ACTC   | A       | ATT   | AGACTG   | AGAT   | TAAA  | GAT      | GAT            |



SARS-CoV-2 & Sulfolobus turreted icosahedral virus.apr

|                                                 |         |             |                                                                                     |       |       |       |       |       |       |       |       |  |
|-------------------------------------------------|---------|-------------|-------------------------------------------------------------------------------------|-------|-------|-------|-------|-------|-------|-------|-------|--|
|                                                 |         | Section 169 |                                                                                     |       |       |       |       |       |       |       |       |  |
|                                                 |         | (13441)     | 13441                                                                               | 13450 | 13460 | 13470 | 13480 | 13490 | 13500 | 13510 | 13520 |  |
| SARS-CoV-2 Reference Genome NC_045512.2         | (13329) | C           | TTGTGCTAATGACCTGTGGGTTTACACTTAAAAACACAGTCTGTACCGTCTGCG-GTATGTGGAAAGGTTATGGCTG       |       |       |       |       |       |       |       |       |  |
| Sulfolobus turreted icosahedral virus NC_005892 | (9353)  | A           | TTTATTTTGATAGCTCCAAT--TTGAAGGGGGAGAGAGAGAATATGTAAATATGAAAAATATATACAAATATATATATAGTG  |       |       |       |       |       |       |       |       |  |
|                                                 |         | Section 170 |                                                                                     |       |       |       |       |       |       |       |       |  |
|                                                 |         | (13521)     | 13521                                                                               | 13530 | 13540 | 13550 | 13560 | 13570 | 13580 | 13590 | 13600 |  |
| SARS-CoV-2 Reference Genome NC_045512.2         | (13408) | T           | AGTTGTGATCAACTCCGCGAACCCATGCTTCAGTCAGCTGATGCACAAATGTTTAAACGGGTTTGGCGGTGAAGTTGC      |       |       |       |       |       |       |       |       |  |
| Sulfolobus turreted icosahedral virus NC_005892 | (9431)  | C           | AAATTGTG-----GATTTA-----GACAAATGATTTTATAC---AATTCTTTTGAACATTT                       |       |       |       |       |       |       |       |       |  |
|                                                 |         | Section 171 |                                                                                     |       |       |       |       |       |       |       |       |  |
|                                                 |         | (13601)     | 13601                                                                               | 13610 | 13620 | 13630 | 13640 | 13650 | 13660 | 13670 | 13680 |  |
| SARS-CoV-2 Reference Genome NC_045512.2         | (13488) | A           | GCCCGTCTACACCGTGCGGCACAGGCACTAGTACTGATGTCGTATACAGGGCTTTTGACATCTACAAATGATAAAGTAG     |       |       |       |       |       |       |       |       |  |
| Sulfolobus turreted icosahedral virus NC_005892 | (9479)  | C           | TTAAAATCATTAAGGAAATCGAGACAC---GATATGATCAAT---TAAAGAGAGGAAATTT---AG---AATAAATTAAGGAG |       |       |       |       |       |       |       |       |  |
|                                                 |         | Section 172 |                                                                                     |       |       |       |       |       |       |       |       |  |
|                                                 |         | (13681)     | 13681                                                                               | 13690 | 13700 | 13710 | 13720 | 13730 | 13740 | 13750 | 13760 |  |
| SARS-CoV-2 Reference Genome NC_045512.2         | (13568) | C           | TGGTTTTGCTAAATTCCTAAAACTAATTGTTGTCGCTTCCAAGAAAGGACGAAAGATGACAAATTTAATTGATTCTTAC     |       |       |       |       |       |       |       |       |  |
| Sulfolobus turreted icosahedral virus NC_005892 | (9546)  | G           | AGG---GAAGACTTGGCCAAATG---ACGTATTCGTTTGGGAGAACGTCTTCAAAAGACACTTTCAAGAAATT---GCA     |       |       |       |       |       |       |       |       |  |
|                                                 |         | Section 173 |                                                                                     |       |       |       |       |       |       |       |       |  |
|                                                 |         | (13761)     | 13761                                                                               | 13770 | 13780 | 13790 | 13800 | 13810 | 13820 | 13830 | 13840 |  |
| SARS-CoV-2 Reference Genome NC_045512.2         | (13648) | T           | TTTGTAGTTAAAGAGACACACTTCTCTAACTACCAACATGAAGAAACAATTTATATTTACTTAAAGGATTGTC-AGCTG     |       |       |       |       |       |       |       |       |  |
| Sulfolobus turreted icosahedral virus NC_005892 | (9616)  | T           | TTTACAAAATAATAT-----TACAAGAAAGGAG-AACCAAGATC-----TTAAGAGTACCATAACATTTCTCATAGAGA     |       |       |       |       |       |       |       |       |  |
|                                                 |         | Section 174 |                                                                                     |       |       |       |       |       |       |       |       |  |
|                                                 |         | (13841)     | 13841                                                                               | 13850 | 13860 | 13870 | 13880 | 13890 | 13900 | 13910 | 13920 |  |
| SARS-CoV-2 Reference Genome NC_045512.2         | (13727) | T           | TGCTTAAACATGACTTCCTTAAAGTTTAGAATAGACGGTGTACATGGTACCACATATATCACGTCAACGTCCTTACTAAATAC |       |       |       |       |       |       |       |       |  |
| Sulfolobus turreted icosahedral virus NC_005892 | (9683)  | G           | ATAAGGCA--AGCTCAGAAAGAAGC-AGTAA--GAAAGAGCGATCACATTAAAGAG--ATATATAACAAATAAC          |       |       |       |       |       |       |       |       |  |
|                                                 |         | Section 175 |                                                                                     |       |       |       |       |       |       |       |       |  |
|                                                 |         | (13921)     | 13921                                                                               | 13930 | 13940 | 13950 | 13960 | 13970 | 13980 | 13990 | 14000 |  |
| SARS-CoV-2 Reference Genome NC_045512.2         | (13807) | A           | CAATGGCAGACCTCGTCTATGCTTAAAGGCATTTTGTATGAAGGTAAATTTGTGACACATTAAAGAAATACTTGTCA       |       |       |       |       |       |       |       |       |  |
| Sulfolobus turreted icosahedral virus NC_005892 | (9755)  | A           | AGGAGCTAAGTGCATTCAATGTAAATAAACGATACGATTAGGAGAAATTTGTTACTTCGATCCAGAAAT-----CATA      |       |       |       |       |       |       |       |       |  |

SARS-CoV-2 & Sulfolobus turreted icosahedral virus.apr

|                                                 |         |                                                                                      |       |       |       |       |       |       |       |       |       |
|-------------------------------------------------|---------|--------------------------------------------------------------------------------------|-------|-------|-------|-------|-------|-------|-------|-------|-------|
|                                                 |         | Section 176                                                                          |       |       |       |       |       |       |       |       |       |
|                                                 |         | (14001)                                                                              | 14001 | 14010 | 14020 | 14030 | 14040 | 14050 | 14060 | 14070 | 14080 |
| SARS-CoV-2 Reference Genome NC_045512.2         | (13887) | CAATTGTTGTGATGATTAATTTCAATAAAAAAGGACTGTTATGATTTGTAGAAAACCCAGATATAATTACGCGTA--TA      |       |       |       |       |       |       |       |       |       |
| Sulfolobus turreted icosahedral virus NC_005892 | (9830)  | AAGTTCTATG--TGCTAAATGTTTCGTAAAGAAATACAGTCAAGAGATCATGACAGAAGAAGCGATAAAGCAGAACTTA      |       |       |       |       |       |       |       |       |       |
|                                                 |         | Section 177                                                                          |       |       |       |       |       |       |       |       |       |
|                                                 |         | (14081)                                                                              | 14081 | 14090 | 14100 | 14110 | 14120 | 14130 | 14140 | 14150 | 14160 |
| SARS-CoV-2 Reference Genome NC_045512.2         | (13965) | CGCCAACTTAGGTGAACGTGTACGCACAGCTTTGTTAAAAACAGTACAAATCTGTGATGCCATGCGAAATGCTGGTATTG     |       |       |       |       |       |       |       |       |       |
| Sulfolobus turreted icosahedral virus NC_005892 | (9908)  | AGTTAGCTAGGCTGAAGGAAGAGATCAGAGCGTTAGAAATCAGAGAGAAAAAATATGAA--TGAAATGAAAGACTGCA       |       |       |       |       |       |       |       |       |       |
|                                                 |         | Section 178                                                                          |       |       |       |       |       |       |       |       |       |
|                                                 |         | (14161)                                                                              | 14161 | 14170 | 14180 | 14190 | 14200 | 14210 | 14220 | 14230 | 14240 |
| SARS-CoV-2 Reference Genome NC_045512.2         | (14045) | TTGGTGTACTGACATTAGATAATCAAGATCTCAAATGGTAACCTGGTATGATTTTCGGTGATTTCTATACAAACCCAGCCAGGT |       |       |       |       |       |       |       |       |       |
| Sulfolobus turreted icosahedral virus NC_005892 | (9985)  | CAAAATATACGAAGAGATGAATGAAAGAGCTCAGCTCTTACTCAAAATATAGAC---GA---AATGAAAAAATTCT--TT     |       |       |       |       |       |       |       |       |       |
|                                                 |         | Section 179                                                                          |       |       |       |       |       |       |       |       |       |
|                                                 |         | (14241)                                                                              | 14241 | 14250 | 14260 | 14270 | 14280 | 14290 | 14300 | 14310 | 14320 |
| SARS-CoV-2 Reference Genome NC_045512.2         | (14125) | AGTGGAGTTCTCTGTGTAGATTCCTATTATTTCATTGTTAATGCCTATATTAACCTTGACCAAGGGCTTTAACTGCAGAGTC   |       |       |       |       |       |       |       |       |       |
| Sulfolobus turreted icosahedral virus NC_005892 | (10057) | ATGGAAATAC---GTAAATATAGTAACCCA-AACGAAGACGAGAAATCTACTGAAACAATAAATAGATGAAATGGT         |       |       |       |       |       |       |       |       |       |
|                                                 |         | Section 180                                                                          |       |       |       |       |       |       |       |       |       |
|                                                 |         | (14321)                                                                              | 14321 | 14330 | 14340 | 14350 | 14360 | 14370 | 14380 | 14390 | 14400 |
| SARS-CoV-2 Reference Genome NC_045512.2         | (14205) | ACATGTTGACACTGACTTAACAAAGCCCTTACATTAAGTGGGAT-----TTGTTAAAATATGACTTCACGGAAAGAGGT      |       |       |       |       |       |       |       |       |       |
| Sulfolobus turreted icosahedral virus NC_005892 | (10131) | AGAAATAGAGAAAGAGATCGCAGAGAGTTTTTAACTACTTCTAAAGCAATGTTTGAAGAGGGTTAAGAAATGGAAGAG       |       |       |       |       |       |       |       |       |       |
|                                                 |         | Section 181                                                                          |       |       |       |       |       |       |       |       |       |
|                                                 |         | (14401)                                                                              | 14401 | 14410 | 14420 | 14430 | 14440 | 14450 | 14460 | 14470 | 14480 |
| SARS-CoV-2 Reference Genome NC_045512.2         | (14279) | TAAAACCTCTTTGACCGTTATTTTAAATATTGTTGGG-ATCAGACATACCAACCAAAATTGTTTAACTGTTTGGG--TGACAGA |       |       |       |       |       |       |       |       |       |
| Sulfolobus turreted icosahedral virus NC_005892 | (10211) | TAAACTCTTTATACCTCAGAGCTTAACATGGAGGTTAAAGAAATGAAAACGCATCTCCTCTTCAAAAATGTAGAGA         |       |       |       |       |       |       |       |       |       |
|                                                 |         | Section 182                                                                          |       |       |       |       |       |       |       |       |       |
|                                                 |         | (14481)                                                                              | 14481 | 14490 | 14500 | 14510 | 14520 | 14530 | 14540 | 14550 | 14560 |
| SARS-CoV-2 Reference Genome NC_045512.2         | (14356) | TGCA-TTCTGCATT---GTGCAAACTTTAATGTTTATTCTCTACAGTGTTCACACCTAACAGTTTTTGGACCACTAGTGA     |       |       |       |       |       |       |       |       |       |
| Sulfolobus turreted icosahedral virus NC_005892 | (10291) | AAAGTATCTCAACAGAGTTTGA-AAATAGAAATAGACTGGACTGTACAGTCTCGTTTAAAGATAAAAAACGAAATACT--     |       |       |       |       |       |       |       |       |       |

SARS-CoV-2 & Sulfolobus turreted icosahedral virus.apr

|                                                         |         |             |                                 |                         |                                       |                         |                        |            |                  |             |        |      |    |      |           |
|---------------------------------------------------------|---------|-------------|---------------------------------|-------------------------|---------------------------------------|-------------------------|------------------------|------------|------------------|-------------|--------|------|----|------|-----------|
|                                                         |         | Section 183 |                                 |                         |                                       |                         |                        |            |                  |             |        |      |    |      |           |
|                                                         | (14561) | 14561       | 14570                           | 14580                   | 14590                                 | 14600                   | 14610                  | 14620      | 14630            | 14640       |        |      |    |      |           |
| SARS-CoV-2 Reference Genome NC_045512.2 (14432)         |         | GAAA        | AATATTTGTTGATGGTGTTC            | ATTTGTA-GTTTC           | AACTGGATACCACTTCAGAGAGCTAGGTGTTGTACAT | AATCA                   |                        |            |                  |             |        |      |    |      |           |
| Sulfolobus turreted icosahedral virus NC_005892 (10368) |         | -AAA        | GATCATAGAGGAGATAGCT-A           | AGAA                    | GCAAGGAAA                             | AAATAAATCTG             | AAGTGATA-AGAGAGGCATTAA | AAGA       | A                | GAAA        |        |      |    |      |           |
|                                                         |         | Section 184 |                                 |                         |                                       |                         |                        |            |                  |             |        |      |    |      |           |
|                                                         | (14641) | 14641       | 14650                           | 14660                   | 14670                                 | 14680                   | 14690                  | 14700      | 14710            | 14720       |        |      |    |      |           |
| SARS-CoV-2 Reference Genome NC_045512.2 (14511)         |         | GGATGT      | AAA                             | CTTACATAGCTCTAGACTTAG   | TTTTTA-AGGAATTACTTTGTGTATGCTGCTG      | ACCC                    | TGCTAT                 | ATGC       | ACGCTGCT         |             |        |      |    |      |           |
| Sulfolobus turreted icosahedral virus NC_005892 (10445) |         | TTGATG      | AAA                             | --TAAAGAATTTAGGAGTGG    | AAGAGT                                | AGTAAGTTTTCGAGCAAAAT    | ----                   | ATAATGAAAT | TGA-G            | --ATG       |        |      |    |      |           |
|                                                         |         | Section 185 |                                 |                         |                                       |                         |                        |            |                  |             |        |      |    |      |           |
|                                                         | (14721) | 14721       | 14730                           | 14740                   | 14750                                 | 14760                   | 14770                  | 14780      | 14790            | 14800       |        |      |    |      |           |
| SARS-CoV-2 Reference Genome NC_045512.2 (14590)         |         | TCT         | GGTAATCTATTACTAGATAAACGC        | ACTACGTGCTTTTCAGTAGCTGC | ACTTACTAA                             | CAATGTTGCTTTTCAAACTGT   |                        |            |                  |             |        |      |    |      |           |
| Sulfolobus turreted icosahedral virus NC_005892 (10516) |         | ATA         | GATAATATAGCTAAACA-AAAAGGAGTAAGT | AGAAC                   | TGATATAATTTCA                         | TCTAA                   | AAATAGCTAAATA          | TCTTG      | AAAAG            | G           |        |      |    |      |           |
|                                                         |         | Section 186 |                                 |                         |                                       |                         |                        |            |                  |             |        |      |    |      |           |
|                                                         | (14801) | 14801       | 14810                           | 14820                   | 14830                                 | 14840                   | 14850                  | 14860      | 14870            | 14880       |        |      |    |      |           |
| SARS-CoV-2 Reference Genome NC_045512.2 (14670)         |         | CAAACCCGGT  | AATT                            | T--TAA                  | CAAGA                                 | CTTC                    | TATGACTTTGCTGTG        | TCTAAGG    | GTTCTTTAAGGAAGG  | AGTTC       | TGTT-G |      |    |      |           |
| Sulfolobus turreted icosahedral virus NC_005892 (10595) |         | AGGGGATAA   | TGATT                           | G                       | TAA                                   | CAAGTCTTC               | ATGCCAGCAGAA           | GTGATAG    | AAGAGATTTACAGAAG | AAACGGAAGT  | TATTG  |      |    |      |           |
|                                                         |         | Section 187 |                                 |                         |                                       |                         |                        |            |                  |             |        |      |    |      |           |
|                                                         | (14881) | 14881       | 14890                           | 14900                   | 14910                                 | 14920                   | 14930                  | 14940      | 14950            | 14960       |        |      |    |      |           |
| SARS-CoV-2 Reference Genome NC_045512.2 (14747)         |         | AA          | TAAAA                           | C                       | ACTTCTTCTTTGCTCAGG                    | ATGGTAATGCTGCTATCAGC    | GA--TTATGACTACTATC--GT | TATAA      | CTAC             |             |        |      |    |      |           |
| Sulfolobus turreted icosahedral virus NC_005892 (10675) |         | AA          | TAAAA                           | G                       | AGATGCTCT                             | GCATTTGGCAATTT          | CATCTTGT               | TAGAT-GAGG | TTGAGAGGCGAAC    | GAAATAGAACT | TATT   |      |    |      |           |
|                                                         |         | Section 188 |                                 |                         |                                       |                         |                        |            |                  |             |        |      |    |      |           |
|                                                         | (14961) | 14961       | 14970                           | 14980                   | 14990                                 | 15000                   | 15010                  | 15020      | 15030            | 15040       |        |      |    |      |           |
| SARS-CoV-2 Reference Genome NC_045512.2 (14823)         |         | AAC         | AAT                             | GTGTGATATCAGAC-AACT     | ACTATTTGTAGTTGAAGTTG-TTGA             | TAAGTACTTTGATTGTTACGATG | GTGGCT                 | G          |                  |             |        |      |    |      |           |
| Sulfolobus turreted icosahedral virus NC_005892 (10754) |         | TGG         | AAT                             | A-AGAAGTTTGGCTAGGA      | AAAGTGTATGTCA                         | GAGATAGTAAGT            | TAGAGAGGTTAAGG         | GTT-TTGGC  | G                | CAAAAG      |        |      |    |      |           |
|                                                         |         | Section 189 |                                 |                         |                                       |                         |                        |            |                  |             |        |      |    |      |           |
|                                                         | (15041) | 15041       | 15050                           | 15060                   | 15070                                 | 15080                   | 15090                  | 15100      | 15110            | 15120       |        |      |    |      |           |
| SARS-CoV-2 Reference Genome NC_045512.2 (14901)         |         | TATTA       | ATGCTAACCAAGT                   | CATCGTCAACAACC          | TAGACAAATCAGCTGGT                     | TTTCCATTTAAT            | AAATG                  | GGGGT      | AAGG             | CTAGAC      |        |      |    |      |           |
| Sulfolobus turreted icosahedral virus NC_005892 (10832) |         | TATA        | AC                              | TGC-----AGT             | TATGGTAG---                           | AGTTT                   | TAC---                 | T          | AGCT             | TATA        | TTATC  | AAAA | AG | AAAG | AAGGA-ATA |

SARS-CoV-2 & Sulfolobus turreted icosahedral virus.apr

|                                                         |         |             |             |            |            |            |          |              |                                   |
|---------------------------------------------------------|---------|-------------|-------------|------------|------------|------------|----------|--------------|-----------------------------------|
|                                                         |         | Section 190 |             |            |            |            |          |              |                                   |
|                                                         | (15121) | 15121       | 15130       | 15140      | 15150      | 15160      | 15170    | 15180        | 15190 15200                       |
| SARS-CoV-2 Reference Genome NC_045512.2 (14981)         |         | TTTAT       | TATGATTC-AA | TGAGTTATG  | AGGATCAAGA | TGCAC      | TTTTCGCA | TATACAAAACG  | TAATGTCATCCCTACTATAAC             |
| Sulfolobus turreted icosahedral virus NC_005892 (10899) |         | TGGCATGGG   | TGGGAA      | GTATGGCA   | AAGGTAA    | AGGTT      | TATAAAAC | TTTCCT---    | TAGATGAAGAAACATTTC                |
|                                                         |         | Section 191 |             |            |            |            |          |              |                                   |
|                                                         | (15201) | 15201       | 15210       | 15220      | 15230      | 15240      | 15250    | 15260        | 15270 15280                       |
| SARS-CoV-2 Reference Genome NC_045512.2 (15060)         |         | TCAAATGAAT  | TCTTAA      | GTATGCCATT | AGTGC      | AAAGAA     | TAGAGC   | TC-GCACC     | GTAGCTGGTGTCTCTATCTGTAGTACTATG    |
| Sulfolobus turreted icosahedral virus NC_005892 (10976) |         | T---ATTAG   | TAAAGC      | ACAAGAGA   | AGGCG      | AAAGAA     | AAG---   | TATGGA       | ATAGACACAAAGCTTGGAACAATAAAATT     |
|                                                         |         | Section 192 |             |            |            |            |          |              |                                   |
|                                                         | (15281) | 15281       | 15290       | 15300      | 15310      | 15320      | 15330    | 15340        | 15350 15360                       |
| SARS-CoV-2 Reference Genome NC_045512.2 (15139)         |         | ACCAATAGAC  | AGTTTC      | ATCAAAAATT | ATTGAAAT   | CAATAGCC   | GCCACT   | AGAGGAGCTACT | TGTAGTAATTTGGAACAAGCAA            |
| Sulfolobus turreted icosahedral virus NC_005892 (11046) |         | AGCTTTAAAG  | AGGCTA      | ATCGAAGAT  | GA---GAAT  | TGATA-TA   | GA-AGG   | AGAGAAAGTTAG | TAGCTGAGATTGAACGGA---             |
|                                                         |         | Section 193 |             |            |            |            |          |              |                                   |
|                                                         | (15361) | 15361       | 15370       | 15380      | 15390      | 15400      | 15410    | 15420        | 15430 15440                       |
| SARS-CoV-2 Reference Genome NC_045512.2 (15219)         |         | ATTCTATGG   | TGGTTGG     | CACACAT    | TGTAA      | AAACTGTTTA | TAGTGATG | TAGAAA       | CCCTCACCTTTATGGTTGGGATTATC        |
| Sulfolobus turreted icosahedral virus NC_005892 (11118) |         | ----TACGT   | TCAATAA     | CAGGAC     | TGTCTC     | AAAAGCAAGT | TA-----  | CTGA         | ACTTCTTTAAATTATGCGTTAAGA--ATT     |
|                                                         |         | Section 194 |             |            |            |            |          |              |                                   |
|                                                         | (15441) | 15441       | 15450       | 15460      | 15470      | 15480      | 15490    | 15500        | 15510 15520                       |
| SARS-CoV-2 Reference Genome NC_045512.2 (15299)         |         | CTAAATGTG   | ATAGAGCC    | ATGCCT     | AACATGCTT  | AGAAT      | TATGGCC  | CACTFG       | TTCTTGCTCGCAACAATACAACTGTTTGT     |
| Sulfolobus turreted icosahedral virus NC_005892 (11186) |         | CC-AGTGTG   | CAATATT     | ATGTAG     | AAAAC----  | AGATG      | TATTATT  | TAAATG       | -----AACAA-AAAACCTTTGTG           |
|                                                         |         | Section 195 |             |            |            |            |          |              |                                   |
|                                                         | (15521) | 15521       | 15530       | 15540      | 15550      | 15560      | 15570    | 15580        | 15590 15600                       |
| SARS-CoV-2 Reference Genome NC_045512.2 (15379)         |         | AGCTTGTCA   | CACCGTTTC   | TATAGAT    | TAGCTAA    | TGAGTGT    | GCTCAA   | GTATTG       | AGTGAAATGGTCA                     |
| Sulfolobus turreted icosahedral virus NC_005892 (11248) |         | TCTTTT      | TGCAAC      | TTCGT----- | TAGCAT     | ACTATTT    | TTT      | TGAAA        | AAATTATGTAACTCTTCAAACTCTTTATGCCCT |
|                                                         |         | Section 196 |             |            |            |            |          |              |                                   |
|                                                         | (15601) | 15601       | 15610       | 15620      | 15630      | 15640      | 15650    | 15660        | 15670 15680                       |
| SARS-CoV-2 Reference Genome NC_045512.2 (15458)         |         | TATATGT     | TAAACC      | AGGTGGA    | ACCTCAT    | CAGGAGAT   | GCCACAA  | CTGCTT       | ATGCTAATAGTGTTTTAACATTTGTCAAGCT   |
| Sulfolobus turreted icosahedral virus NC_005892 (11322) |         | TCTCTGT     | -----       | AAGAAAT    | AAAACT     | TTTCCA     | TCCGCG   | CTTCTT       | CCCTAGATATT-TTATCATCAATT-----     |

SARS-CoV-2 & Sulfolobus turreted icosahedral virus.apr

|                                                         |         |        |       |         |        |        |          |         |       |        |        |        |          |         |             |        |         |       |       |       |     |       |     |     |     |   |   |   |
|---------------------------------------------------------|---------|--------|-------|---------|--------|--------|----------|---------|-------|--------|--------|--------|----------|---------|-------------|--------|---------|-------|-------|-------|-----|-------|-----|-----|-----|---|---|---|
|                                                         |         |        |       |         |        |        |          |         |       |        |        |        |          |         | Section 197 |        |         |       |       |       |     |       |     |     |     |   |   |   |
|                                                         | (15681) | 15681  | 15690 | 15700   | 15710  | 15720  | 15730    | 15740   | 15750 | 15760  |        |        |          |         |             |        |         |       |       |       |     |       |     |     |     |   |   |   |
| SARS-CoV-2 Reference Genome NC_045512.2 (15538)         | GTC     | ACG    | GCCAA | TGTTAA  | TGCACT | TTTAT  | CTACTGAT | GGTAA   | CAAAA | ATTG   | CCGAT  | AAGT   | ATGTC    | CGCAAT  | TTACAA      | CACAG  |         |       |       |       |     |       |     |     |     |   |   |   |
| Sulfolobus turreted icosahedral virus NC_005892 (11387) | ---     | AAT    | GAATC | TATTAAG | GATATA | TAATA  | CACCATCA | GAAAT   | TGTCT | AT     | -----  | ATCAA  | ATCTC    | TTCAAT  | A--TCT      | CGCTT  |         |       |       |       |     |       |     |     |     |   |   |   |
|                                                         |         |        |       |         |        |        |          |         |       |        |        |        |          |         |             |        |         |       |       |       |     |       |     |     |     |   |   |   |
|                                                         |         |        |       |         |        |        |          |         |       |        |        |        |          |         | Section 198 |        |         |       |       |       |     |       |     |     |     |   |   |   |
|                                                         | (15761) | 15761  | 15770 | 15780   | 15790  | 15800  | 15810    | 15820   | 15830 | 15840  |        |        |          |         |             |        |         |       |       |       |     |       |     |     |     |   |   |   |
| SARS-CoV-2 Reference Genome NC_045512.2 (15618)         | AC      | TTTAT  | GAGT  | GTCTC   | TATAG  | --AA   | TAGAG    | GAT     | TGT   | TGAC   | ACAG   | ACTTT  | GTGAAT   | GAGT    | TTTAC       | GCA    | TAT     | TTG   | CGT   | AAACA |     |       |     |     |     |   |   |   |
| Sulfolobus turreted icosahedral virus NC_005892 (11456) | CT      | TAGTC  | GTTT  | CTC     | -TCA   | AGTCT  | ACTTCC   | GTTT    | TATTT | TACCA  | TACTTT | CA     | GAATA    | ATG     | TAGTAG      | GTT    | TAT     | --C   | CTC   | ATATA |     |       |     |     |     |   |   |   |
|                                                         |         |        |       |         |        |        |          |         |       |        |        |        |          |         |             |        |         |       |       |       |     |       |     |     |     |   |   |   |
|                                                         |         |        |       |         |        |        |          |         |       |        |        |        |          |         | Section 199 |        |         |       |       |       |     |       |     |     |     |   |   |   |
|                                                         | (15841) | 15841  | 15850 | 15860   | 15870  | 15880  | 15890    | 15900   | 15910 | 15920  |        |        |          |         |             |        |         |       |       |       |     |       |     |     |     |   |   |   |
| SARS-CoV-2 Reference Genome NC_045512.2 (15696)         | T       | TTCTCA | ATGAT | GATACT  | CCTC   | TGACG  | ATGCT    | GT      | TGTG  | TTTCAA | TAGC   | ACT-TA | ---      | TGCATCT | CAAGG       | TCTA   | -GTGG   | C     |       |       |     |       |     |     |     |   |   |   |
| Sulfolobus turreted icosahedral virus NC_005892 (11533) | C       | TTTCTG | ATTTT | CATACT  | TTCA   | GTTA   | ACTCTGT  | -GT     | AGT   | TTTTAA | GTCT   | ACGC   | TAGAC    | TCTATCT | TATAA       | TC     | CAAGTGG | G     |       |       |     |       |     |     |     |   |   |   |
|                                                         |         |        |       |         |        |        |          |         |       |        |        |        |          |         |             |        |         |       |       |       |     |       |     |     |     |   |   |   |
|                                                         |         |        |       |         |        |        |          |         |       |        |        |        |          |         | Section 200 |        |         |       |       |       |     |       |     |     |     |   |   |   |
|                                                         | (15921) | 15921  | 15930 | 15940   | 15950  | 15960  | 15970    | 15980   | 15990 | 16000  |        |        |          |         |             |        |         |       |       |       |     |       |     |     |     |   |   |   |
| SARS-CoV-2 Reference Genome NC_045512.2 (15771)         | T       | AGCAT  | AAA   | GAAC    | TTTAA  | GT     | CAGT     | TTCT    | TATTA | TC     | AAA    | AACA   | ATG      | TTTAT   | GTCT        | GAAG   | --C     | AAAAT | GT    | TGG   | ACT | GAGAC |     |     |     |   |   |   |
| Sulfolobus turreted icosahedral virus NC_005892 (11612) | A       | AA     | CAT   | ---     | GAAC   | GATAA  | TAC--    | TTATATA | CTTCT | -AACA  | CAGAG  | CTC    | TAGAGATA | GAGG    | GTA         | AAAAAT | AT      | GAAA  | AGC   | GAAAG |     |       |     |     |     |   |   |   |
|                                                         |         |        |       |         |        |        |          |         |       |        |        |        |          |         |             |        |         |       |       |       |     |       |     |     |     |   |   |   |
|                                                         |         |        |       |         |        |        |          |         |       |        |        |        |          |         | Section 201 |        |         |       |       |       |     |       |     |     |     |   |   |   |
|                                                         | (16001) | 16001  | 16010 | 16020   | 16030  | 16040  | 16050    | 16060   | 16070 | 16080  |        |        |          |         |             |        |         |       |       |       |     |       |     |     |     |   |   |   |
| SARS-CoV-2 Reference Genome NC_045512.2 (15849)         | TGA     | CCTT   | ACT   | AAAG    | GACCT  | -CATG  | AA       | TTTGC   | TCTCA | ACAT   | ACAA   | TGC    | TAG      | TTAA    | CAG         | GGTGA  | TGATTAT | GTGT  | AC    | CTT   |     |       |     |     |     |   |   |   |
| Sulfolobus turreted icosahedral virus NC_005892 (11686) | AAG     | CAAG   | AGA   | AAAG    | TATCT  | TG     | CAA      | AACTTT  | AT    | TCTAT  | ACAA   | AGAA   | ATT      | TAG     | GAGAA       | GC-G   | CTCAC   | ----  | AGAGG | AGCAG |     |       |     |     |     |   |   |   |
|                                                         |         |        |       |         |        |        |          |         |       |        |        |        |          |         |             |        |         |       |       |       |     |       |     |     |     |   |   |   |
|                                                         |         |        |       |         |        |        |          |         |       |        |        |        |          |         | Section 202 |        |         |       |       |       |     |       |     |     |     |   |   |   |
|                                                         | (16081) | 16081  | 16090 | 16100   | 16110  | 16120  | 16130    | 16140   | 16150 | 16160  |        |        |          |         |             |        |         |       |       |       |     |       |     |     |     |   |   |   |
| SARS-CoV-2 Reference Genome NC_045512.2 (15928)         | C       | CTT    | ACCC  | AGAT    | TC     | CATCAA | GATC     | CCT     | AGG   | GG     | CGGCT  | GTTT   | TG       | TAGAT   | GAT         | ATCGT  | AAAAA   | ACA   | GAT   | GG    | TAC | ACT   | TAT | GAT |     |   |   |   |
| Sulfolobus turreted icosahedral virus NC_005892 (11760) | C       | GAAA   | AGT   | AGA     | G      | CAGG   | GCG      | G       | A     | ---    | AAAG   | T      | CAATAG   | ---     | ATG         | CATAT  | TAT     | TATA  | -CTGT | AAG   | GAT | --TAG | GGC | TAT | TTT |   |   |   |
|                                                         |         |        |       |         |        |        |          |         |       |        |        |        |          |         |             |        |         |       |       |       |     |       |     |     |     |   |   |   |
|                                                         |         |        |       |         |        |        |          |         |       |        |        |        |          |         | Section 203 |        |         |       |       |       |     |       |     |     |     |   |   |   |
|                                                         | (16161) | 16161  | 16170 | 16180   | 16190  | 16200  | 16210    | 16220   | 16230 | 16240  |        |        |          |         |             |        |         |       |       |       |     |       |     |     |     |   |   |   |
| SARS-CoV-2 Reference Genome NC_045512.2 (16008)         | TG      | A      | ACG   | G       | T      | CGT    | G        | T       | C     | T      | T      | T      | A        | G       | C           | T      | A       | T     | A     | G     | A   | T     | C   | T   | A   | A | T |   |
| Sulfolobus turreted icosahedral virus NC_005892 (11831) | G       | A      | T     | G       | A      | G      | T        | A       | A     | ---    | C      | G      | A        | A       | G           | T      | A       | T     | A     | G     | A   | G     | C   | T   | T   | A | A | A |

SARS-CoV-2 & Sulfolobus turreted icosahedral virus.apr

|                                                         |         |                                                                                        |       |       |       |       |       |       |       |             |
|---------------------------------------------------------|---------|----------------------------------------------------------------------------------------|-------|-------|-------|-------|-------|-------|-------|-------------|
|                                                         |         |                                                                                        |       |       |       |       |       |       |       | Section 204 |
|                                                         | (16241) | 16241                                                                                  | 16250 | 16260 | 16270 | 16280 | 16290 | 16300 | 16310 | 16320       |
| SARS-CoV-2 Reference Genome NC_045512.2 (16088)         |         | TGTACTTACAAATACATAAGAAAGCTACATGATGAGTTACAAGGACACATGTTAGAC-ATGTATTCGTGTTATGCTTACTAA     |       |       |       |       |       |       |       |             |
| Sulfolobus turreted icosahedral virus NC_005892 (11908) |         | TGAAACTTAGAGTGATAAGAGAAGATAAGCAAGACACCAATTGGCGATTTTATATGAGCAAGATAACGATTAATATAA         |       |       |       |       |       |       |       |             |
|                                                         |         |                                                                                        |       |       |       |       |       |       |       | Section 205 |
|                                                         | (16321) | 16321                                                                                  | 16330 | 16340 | 16350 | 16360 | 16370 | 16380 | 16390 | 16400       |
| SARS-CoV-2 Reference Genome NC_045512.2 (16167)         |         | TGATAACACTTTCAGGTATGGAACCTGAG---TTTATGAGGCTATGTACA-CACCGCATACAGTCTTACAGGCTGTT          |       |       |       |       |       |       |       |             |
| Sulfolobus turreted icosahedral virus NC_005892 (11988) |         | AGATAATACA--ATAGAAATACGGACACAAAGAAATTTGTGCTAAGTAATTACACAAGAGATATAAAAAATTGGCAGAAA       |       |       |       |       |       |       |       |             |
|                                                         |         |                                                                                        |       |       |       |       |       |       |       | Section 206 |
|                                                         | (16401) | 16401                                                                                  | 16410 | 16420 | 16430 | 16440 | 16450 | 16460 | 16470 | 16480       |
| SARS-CoV-2 Reference Genome NC_045512.2 (16243)         |         | GGGGCTTGTGTTCTTTGCG--AATTCACAGACTTCATTAAAGATGTGTGCTTGCAACGTAGACCATTTCTATGTTGTAA        |       |       |       |       |       |       |       |             |
| Sulfolobus turreted icosahedral virus NC_005892 (12066) |         | AGTTTATCA GTTAGCTAAGTTAATAGAAAGCTTAGTCAATACGAAGAAGAG--TAGATACAGAAATTATA-----TAA        |       |       |       |       |       |       |       |             |
|                                                         |         |                                                                                        |       |       |       |       |       |       |       | Section 207 |
|                                                         | (16481) | 16481                                                                                  | 16490 | 16500 | 16510 | 16520 | 16530 | 16540 | 16550 | 16560       |
| SARS-CoV-2 Reference Genome NC_045512.2 (16320)         |         | ATGCTGTTACGACCATGTCATATCAACATCACATAAATTAGTCTTGCTGTTAAT-CCGTATGTTTGAATGCTCCAGGT         |       |       |       |       |       |       |       |             |
| Sulfolobus turreted icosahedral virus NC_005892 (12138) |         | TTTATTACACGAGTATGCAATATATCTAGCTGGAGCCACA TCTCTCTTTATTGATCTGTAAATTAAGTAATACTCATGAT      |       |       |       |       |       |       |       |             |
|                                                         |         |                                                                                        |       |       |       |       |       |       |       | Section 208 |
|                                                         | (16561) | 16561                                                                                  | 16570 | 16580 | 16590 | 16600 | 16610 | 16620 | 16630 | 16640       |
| SARS-CoV-2 Reference Genome NC_045512.2 (16399)         |         | TGTGATGTCACAGATGTGACTCAACTT-TACTTAGGAGGTATGAGCTATTATTGTAAATCACATAAACCAACCATTAAGTT      |       |       |       |       |       |       |       |             |
| Sulfolobus turreted icosahedral virus NC_005892 (12218) |         | TTTTTTTAAACTCTTTTTCTGAGTCTAAATATTGATGAGTTC--AAGCTTCT---GAAAAAGAAAGAAAGAACACAGCAAA--    |       |       |       |       |       |       |       |             |
|                                                         |         |                                                                                        |       |       |       |       |       |       |       | Section 209 |
|                                                         | (16641) | 16641                                                                                  | 16650 | 16660 | 16670 | 16680 | 16690 | 16700 | 16710 | 16720       |
| SARS-CoV-2 Reference Genome NC_045512.2 (16478)         |         | TTCCATTGTTGTGCTAATGACAAAGTTTTTGGTTTATATAAAATAACATGTGTTGGTAGCGATAAATGTTACTGACTTTAA      |       |       |       |       |       |       |       |             |
| Sulfolobus turreted icosahedral virus NC_005892 (12291) |         | -AACAGAAAGAGAAAGAAAAGAGAACAAAAAGACAGAGAAAGAAAGGACGAAAAAGTAGAAGAGAGAAAGAGAA-GAGAGAACAAA |       |       |       |       |       |       |       |             |
|                                                         |         |                                                                                        |       |       |       |       |       |       |       | Section 210 |
|                                                         | (16721) | 16721                                                                                  | 16730 | 16740 | 16750 | 16760 | 16770 | 16780 | 16790 | 16800       |
| SARS-CoV-2 Reference Genome NC_045512.2 (16558)         |         | GCAAATTGCAACATGTGACTGGACAAATGCTGGTGATTACATTTTATGCTAACACCTGTACTGAAAGACTCAAGCTTTTTGC     |       |       |       |       |       |       |       |             |
| Sulfolobus turreted icosahedral virus NC_005892 (12369) |         | AGAAAGG--AACAGGCTGAAAAACAAAGAGGCCAAGAAAGAGAGAAAGAGGA---GAAAGAAAGAA-----GT              |       |       |       |       |       |       |       |             |

SARS-CoV-2 & Sulfolobus turreted icosahedral virus.apr

|                                                         |         |             |            |             |             |          |          |           |                                        |
|---------------------------------------------------------|---------|-------------|------------|-------------|-------------|----------|----------|-----------|----------------------------------------|
|                                                         |         | Section 211 |            |             |             |          |          |           |                                        |
|                                                         | (16801) | 16801       | 16810      | 16820       | 16830       | 16840    | 16850    | 16860     | 16870 16880                            |
| SARS-CoV-2 Reference Genome NC_045512.2 (16638)         |         | AGCAGAA     | ACGCTCA    | AAGCT       | ACTGAGGA    | GACATTT  | AACT     | GTCTTATG  | TAATTGCTACTGTACGTGAAGTGCTGTCTGACA      |
| Sulfolobus turreted icosahedral virus NC_005892 (12439) |         | AGCAGAG     | AAGAAG     | AGAAG       | AAAAAGGA    | --ACAAA  | GAAG     | GAAAGAGAA | GAAGAACAAGAAAGAAAGTGTATAAAGCA          |
|                                                         |         | Section 212 |            |             |             |          |          |           |                                        |
|                                                         | (16881) | 16881       | 16890      | 16900       | 16910       | 16920    | 16930    | 16940     | 16950 16960                            |
| SARS-CoV-2 Reference Genome NC_045512.2 (16718)         |         | GAGAA       | TTAC       | ATCTTTCA    | TGGGAAGTT   | GGTAAACC | TAGACC   | ACCAC     | TTAAACGAAATTATGTCTTACTGGTTATCGTG-T     |
| Sulfolobus turreted icosahedral virus NC_005892 (12517) |         | GAGAA       | AGAG       | AGAGGAAG    | TTAGTTACG   | GT-TAAT  | TGATTAG  | -GTTGG    | CATTCTTAAATCATGCTGAT                   |
|                                                         |         | Section 213 |            |             |             |          |          |           |                                        |
|                                                         | (16961) | 16961       | 16970      | 16980       | 16990       | 17000    | 17010    | 17020     | 17030 17040                            |
| SARS-CoV-2 Reference Genome NC_045512.2 (16797)         |         | AAC         | TAAA       | AACAGTAAAGT | ACAAA       | TAGGAGA  | GTAC     | ACCTTT    | GAAAAGGTACTATGGTGATGCTGTTGTTTACCGAGGTA |
| Sulfolobus turreted icosahedral virus NC_005892 (12595) |         | TAT         | TTCC       | ATTTGG      | ----AAAGG   | TGAAGA   | AATGA    | -----GGA  | -AAGAGCAATTGAGGATTTAGAA-GAAGGCATGGTA   |
|                                                         |         | Section 214 |            |             |             |          |          |           |                                        |
|                                                         | (17041) | 17041       | 17050      | 17060       | 17070       | 17080    | 17090    | 17100     | 17110 17120                            |
| SARS-CoV-2 Reference Genome NC_045512.2 (16877)         |         | CAAC        | AAC        | T-TAC       | AAATTAAAT   | GTGGT    | ATTATTTT | GTGCT     | GACATCACA                              |
| Sulfolobus turreted icosahedral virus NC_005892 (12664) |         | GTAG        | AGAT       | TTTTAC      | AGGAAATATAG | ---      | ATTTC    | ---       | GTAGGAGACGT---TACGAGAAATCACA           |
|                                                         |         | Section 215 |            |             |             |          |          |           |                                        |
|                                                         | (17121) | 17121       | 17130      | 17140       | 17150       | 17160    | 17170    | 17180     | 17190 17200                            |
| SARS-CoV-2 Reference Genome NC_045512.2 (16956)         |         | AGTG        | CCACA      | AGAGCACT    | ATGT        | TAGAA    | TACTGG   | CTTA      | TACCCAA                                |
| Sulfolobus turreted icosahedral virus NC_005892 (12732) |         | ATG         | -----      | ATCA        | TACAA       | TAC      | ---      | CTCT      | TATGAAATCAAGTAAA-AGAGGTAAAT            |
|                                                         |         | Section 216 |            |             |             |          |          |           |                                        |
|                                                         | (17201) | 17201       | 17210      | 17220       | 17230       | 17240    | 17250    | 17260     | 17270 17280                            |
| SARS-CoV-2 Reference Genome NC_045512.2 (17036)         |         | CAAAT       | TATC       | AAAAGGT     | TGGT        | ATGCA    | AAAGTAT  | TCACACT   | CCAGGGA                                |
| Sulfolobus turreted icosahedral virus NC_005892 (12794) |         | A---        | TCTC       | GTGAGT      | ATTG        | -ACGCT   | ATCA     | TAA       | TCATAGTGGC                             |
|                                                         |         | Section 217 |            |             |             |          |          |           |                                        |
|                                                         | (17281) | 17281       | 17290      | 17300       | 17310       | 17320    | 17330    | 17340     | 17350 17360                            |
| SARS-CoV-2 Reference Genome NC_045512.2 (17116)         |         | GGCCT       | AGCTCTCTAC | TACC        | CTTCTG      | CTCG     | CATAG    | TGTA      | TACAGCT                                |
| Sulfolobus turreted icosahedral virus NC_005892 (12866) |         | --CCT       | CAACAGGACT | TAACT       | TAAGAT      | CTGT     | CAATC    | TG-       | AGTTCTT                                |

SARS-CoV-2 & Sulfolobus turreted icosahedral virus.apr

|                                                         |         |               |          |              |              |             |               |               |          |             |          |          |          |                  |               |       |
|---------------------------------------------------------|---------|---------------|----------|--------------|--------------|-------------|---------------|---------------|----------|-------------|----------|----------|----------|------------------|---------------|-------|
|                                                         |         | Section 218   |          |              |              |             |               |               |          |             |          |          |          |                  |               |       |
|                                                         | (17361) | 17361         | 17370    | 17380        | 17390        | 17400       | 17410         | 17420         | 17430    | 17440       |          |          |          |                  |               |       |
| SARS-CoV-2 Reference Genome NC_045512.2 (17195)         |         | AGGCATTAA     | AATAATTT | GCTATAGATAAA | ATGTAGTAGAAT | TATACCTGCAC | TGCTCGTGTAGAG | TGTTTT        | TGATAA   | AATTC       |          |          |          |                  |               |       |
| Sulfolobus turreted icosahedral virus NC_005892 (12943) |         | AGAGATTATAATA | AAAAG    | GACGCAAA     | AGGATGGA     | CATTATTAA   | AGGATTGTT     | GAGCGCGGTATAG | ----     | ATGAGAAATGT |          |          |          |                  |               |       |
|                                                         |         | Section 219   |          |              |              |             |               |               |          |             |          |          |          |                  |               |       |
|                                                         | (17441) | 17441         | 17450    | 17460        | 17470        | 17480       | 17490         | 17500         | 17510    | 17520       |          |          |          |                  |               |       |
| SARS-CoV-2 Reference Genome NC_045512.2 (17275)         |         | AAAGTGA       | ATTCAAC  | ATTAGAAC     | GTATG        | TCTTTTGT    | ACTGTAAAT     | GCATTGCC      | TGAGAC   | GACAGCAGAT  | ATAGTT   | GTCTT    |          |                  |               |       |
| Sulfolobus turreted icosahedral virus NC_005892 (13019) |         | ATAGTGA       | --AGGGG  | ATAGA        | ATCATGG      | TGGAATA     | AGCATCCGA     | GAGAATAT      | TTAAGG   | GCAATCAAAT  | CAAA--   | GCTTA    |          |                  |               |       |
|                                                         |         | Section 220   |          |              |              |             |               |               |          |             |          |          |          |                  |               |       |
|                                                         | (17521) | 17521         | 17530    | 17540        | 17550        | 17560       | 17570         | 17580         | 17590    | 17600       |          |          |          |                  |               |       |
| SARS-CoV-2 Reference Genome NC_045512.2 (17355)         |         | TGATGAAA      | TTTCAA   | TGGCAC       | CAAAAT       | TGATG       | CTTCAATG      | CAGATTAC      | GTGCTAA  | GCACTAT     | GTGTAC   | ATTG     |          |                  |               |       |
| Sulfolobus turreted icosahedral virus NC_005892 (13095) |         | AAC           | TCAAA    | G---AA       | GCAG         | CACAAA      | --ATGA        | GCAA          | AAAGTAG  | ATGATG      | AGTGGTT  | AAACTA   | ---AA    | CGTAGAAGAGGAAAGA |               |       |
|                                                         |         | Section 221   |          |              |              |             |               |               |          |             |          |          |          |                  |               |       |
|                                                         | (17601) | 17601         | 17610    | 17620        | 17630        | 17640       | 17650         | 17660         | 17670    | 17680       |          |          |          |                  |               |       |
| SARS-CoV-2 Reference Genome NC_045512.2 (17435)         |         | GC            | GACCCCT  | GCTCAATT     | ACCTGC       | ACCACGCA    | CATTGCT       | AACTA         | AGGGCAC  | ACTAGAAC    | CAGAAT   | ATTTCAAT | TCAGTGT  | GT               |               |       |
| Sulfolobus turreted icosahedral virus NC_005892 (13167) |         | AG            | GAGAGAA  | GAGAGAC      | AGAA         | GAGAGAA     | GAAGCA        | -----         | AAGT-AGG | -----       | AGGAGAAC | TTCCGG   | AGCTAACT | G                |               |       |
|                                                         |         | Section 222   |          |              |              |             |               |               |          |             |          |          |          |                  |               |       |
|                                                         | (17681) | 17681         | 17690    | 17700        | 17710        | 17720       | 17730         | 17740         | 17750    | 17760       |          |          |          |                  |               |       |
| SARS-CoV-2 Reference Genome NC_045512.2 (17515)         |         | AG            | ACTTATG  | AAA          | ACTATAGG     | TCCAGAC     | ATGTCCT       | CGGAAC        | TTGT     | CGGCG       | TTGTC    | TGCTG    | AAATTTGT | TGAC---          | ACTGT         |       |
| Sulfolobus turreted icosahedral virus NC_005892 (13238) |         | CA            | AAAGCCT  | ATAGAG       | ATCAC        | TGAG        | GAGTTG        | TAGC          | CCTAGC   | -CTACGG     | GCGCTC   | TGTG     | --GAGC   | TTGTAGT          | CAGATTCT      |       |
|                                                         |         | Section 223   |          |              |              |             |               |               |          |             |          |          |          |                  |               |       |
|                                                         | (17761) | 17761         | 17770    | 17780        | 17790        | 17800       | 17810         | 17820         | 17830    | 17840       |          |          |          |                  |               |       |
| SARS-CoV-2 Reference Genome NC_045512.2 (17592)         |         | GAGT          | GCTTTT   | GTTTTATG     | ATAATAA      | GC--T       | TAAAGC        | ACATAA        | A----    | GACAAA      | TCAGCT   | CAATG    | CTTTA--  | AAATGTT          | -TT           |       |
| Sulfolobus turreted icosahedral virus NC_005892 (13315) |         | GTCG          | GCTAG    | ATACA        | AGAAG        | ACGT        | GGAAC         | TAAACG        | ACATAA   | TTCCC       | GACGAA   | AGAA     | ATTAA    | CAACACGGG        | AAATATTACT    |       |
|                                                         |         | Section 224   |          |              |              |             |               |               |          |             |          |          |          |                  |               |       |
|                                                         | (17841) | 17841         | 17850    | 17860        | 17870        | 17880       | 17890         | 17900         | 17910    | 17920       |          |          |          |                  |               |       |
| SARS-CoV-2 Reference Genome NC_045512.2 (17663)         |         | ATA           | AGGGTG   | TTATC        | ACG          | CATG        | ATGTTT        | CACTC         | GCAATT   | ACAG        | CCAC     | AAATAG   | GGCGT    | GGTA             | GAAATTCCTTA   | CACGT |
| Sulfolobus turreted icosahedral virus NC_005892 (13395) |         | ATCA          | AACTCT   | TAGAC        | GCTCT        | TGGTC       | TTTT          | TAAC          | GAAA--   | GATAT       | GTTC     | AGTAT    | TCGT     | TCTAG            | GGAATCGGAAGCG | CGGC  |



SARS-CoV-2 & Sulfolobus turreted icosahedral virus.apr

|                                                         |         |             |        |        |       |        |        |       |        |       |          |        |        |       |       |       |        |        |      |        |       |       |      |      |      |       |      |      |     |     |     |     |    |    |    |   |
|---------------------------------------------------------|---------|-------------|--------|--------|-------|--------|--------|-------|--------|-------|----------|--------|--------|-------|-------|-------|--------|--------|------|--------|-------|-------|------|------|------|-------|------|------|-----|-----|-----|-----|----|----|----|---|
|                                                         |         | Section 225 |        |        |       |        |        |       |        |       |          |        |        |       |       |       |        |        |      |        |       |       |      |      |      |       |      |      |     |     |     |     |    |    |    |   |
|                                                         | (17921) | 17921       | 17930  | 17940  | 17950 | 17960  | 17970  | 17980 | 17990  | 18000 |          |        |        |       |       |       |        |        |      |        |       |       |      |      |      |       |      |      |     |     |     |     |    |    |    |   |
| SARS-CoV-2 Reference Genome NC_045512.2 (17743)         |         | AACC        | CTGCTT | GGAGA  | AAAG  | CTGTCT | TTATTT | CACCT | TA     | TAA   | TCACAGAA | TGCTGT | AGCCTC | AAAG  | -ATTT | TGG   | GA     | CT     | AC   |        |       |       |      |      |      |       |      |      |     |     |     |     |    |    |    |   |
| Sulfolobus turreted icosahedral virus NC_005892 (13472) |         | GCTG        | CGGCTT | CAGAT  | ATAG  | TGCGA  | TTGT   | TAA   | CTTAC  | TT    | TAA      | GTC    | CA     | AG    | AAGAG | GA    | AGAAGA | AAAG   | AAGA | T      | CA    | GA    | AA   | AA   |      |       |      |      |     |     |     |     |    |    |    |   |
|                                                         |         | Section 226 |        |        |       |        |        |       |        |       |          |        |        |       |       |       |        |        |      |        |       |       |      |      |      |       |      |      |     |     |     |     |    |    |    |   |
|                                                         | (18001) | 18001       | 18010  | 18020  | 18030 | 18040  | 18050  | 18060 | 18070  | 18080 |          |        |        |       |       |       |        |        |      |        |       |       |      |      |      |       |      |      |     |     |     |     |    |    |    |   |
| SARS-CoV-2 Reference Genome NC_045512.2 (17822)         |         | CAAC        | TCAAA  | CTGTTG | ATTC  | A-TC   | ACAGG  | GC    | TCAGAA | TAT   | GACT     | AT     | GT     | CAT   | AT    | TCAC  | T      | CAAA   | CAC  | TGAAAC | AG    | CT    | CAC  | TC   |      |       |      |      |     |     |     |     |    |    |    |   |
| Sulfolobus turreted icosahedral virus NC_005892 (13552) |         | ACAA        | TGGAA  | GGGAGA | AGGGA | ATA    | AGAG   | C     | GATTT  | GAGT  | --       | GAAA   | AG     | G     | ----  | AT    | AAGG   | T      | GAAA | T      | CAC   | ----- | AA   | CT   | AA   | CG    |      |      |     |     |     |     |    |    |    |   |
|                                                         |         | Section 227 |        |        |       |        |        |       |        |       |          |        |        |       |       |       |        |        |      |        |       |       |      |      |      |       |      |      |     |     |     |     |    |    |    |   |
|                                                         | (18081) | 18081       | 18090  | 18100  | 18110 | 18120  | 18130  | 18140 | 18150  | 18160 |          |        |        |       |       |       |        |        |      |        |       |       |      |      |      |       |      |      |     |     |     |     |    |    |    |   |
| SARS-CoV-2 Reference Genome NC_045512.2 (17901)         |         | TTG         | TAA    | TG     | TAA   | CAG    | ATT    | TA    | ATGTT  | G     | TAT      | TAC    | CAG    | AGCA  | AA    | AGT   | AGG    | CA     | TACT | TT     | GCATA | AT    | GT   | CT   | GAT  | AG    | AG   | CT   | TT  |     |     |     |    |    |    |   |
| Sulfolobus turreted icosahedral virus NC_005892 (13620) |         | TAA         | TGGAG  | G      | AAAT  | G      | GA     | GA    | TA     | TGAAA | G        | T      | CC     | TA    | G     | CAG   | CAT    | G      | AT   | AGT    | CAAT  | C     | TA   | AAG  | TCAG | AT    | AG   | CG   | GA  | AA  | AT  | GG  | -- | TT |    |   |
|                                                         |         | Section 228 |        |        |       |        |        |       |        |       |          |        |        |       |       |       |        |        |      |        |       |       |      |      |      |       |      |      |     |     |     |     |    |    |    |   |
|                                                         | (18161) | 18161       | 18170  | 18180  | 18190 | 18200  | 18210  | 18220 | 18230  | 18240 |          |        |        |       |       |       |        |        |      |        |       |       |      |      |      |       |      |      |     |     |     |     |    |    |    |   |
| SARS-CoV-2 Reference Genome NC_045512.2 (17981)         |         | ATGA        | CAAGTT | GCAA   | TTTT  | ACA    | AGT    | C     | TTGA   | -AATT | CC       | AC     | GT     | AGGAA | TG    | TGG   | CAA    | -      | CTT  | TAC    | AG    | CT    | GA   | AAAT | TG   | ---   | TAAC | AG   |     |     |     |     |    |    |    |   |
| Sulfolobus turreted icosahedral virus NC_005892 (13698) |         | AGAC        | CAGAAA | GCAA   | AAG   | A      | AT     | A     | CTTAAA | A     | CAATT    | AA     | A      | GA    | AGGAA | AA    | GTT    | CA     | GC   | C      | ACGTT | AT    | GAA  | GA   | GTG  | T     | CAAG | TAAC | GA  |     |     |     |    |    |    |   |
|                                                         |         | Section 229 |        |        |       |        |        |       |        |       |          |        |        |       |       |       |        |        |      |        |       |       |      |      |      |       |      |      |     |     |     |     |    |    |    |   |
|                                                         | (18241) | 18241       | 18250  | 18260  | 18270 | 18280  | 18290  | 18300 | 18310  | 18320 |          |        |        |       |       |       |        |        |      |        |       |       |      |      |      |       |      |      |     |     |     |     |    |    |    |   |
| SARS-CoV-2 Reference Genome NC_045512.2 (18056)         |         | GAC         | TC     | TT     | TAA   | AGA    | ----   | T     | GTA    | G     | TAA      | GG     | TAAT   | CA    | CTGGG | T     | ACA    | TCCTAC | A    | CAG    | GC    | CC    | T    | ACAC | AC   | CT    | CA   | GT   | GT  | TGA | CAC |     |    |    |    |   |
| Sulfolobus turreted icosahedral virus NC_005892 (13778) |         | AAAT        | TTT    | CTT    | AGA   | CGGGA  | TAAC   | GA    | AAG    | C     | TA       | CTAA   | TAAAT  | TC    | AA    | GA    | ----   | AG     | CA   | GC     | CC    | T     | -TTA | AG   | -GG  | GT    | CT   | CTT  | CA  | -   |     |     |    |    |    |   |
|                                                         |         | Section 230 |        |        |       |        |        |       |        |       |          |        |        |       |       |       |        |        |      |        |       |       |      |      |      |       |      |      |     |     |     |     |    |    |    |   |
|                                                         | (18321) | 18321       | 18330  | 18340  | 18350 | 18360  | 18370  | 18380 | 18390  | 18400 |          |        |        |       |       |       |        |        |      |        |       |       |      |      |      |       |      |      |     |     |     |     |    |    |    |   |
| SARS-CoV-2 Reference Genome NC_045512.2 (18132)         |         | TAAA        | TTC    | AA     | AACT  | G      | AG     | TTT   | ---    | A     | TGT      | G      | TT     | GACA  | T     | ACCTG | G      | CAT    | AC   | CT     | AAG   | -     | GA   | CAT  | G    | ACCT  | A    | T    | -   | GA  | AG  | ACT | CA | T  | CT | C |
| Sulfolobus turreted icosahedral virus NC_005892 (13851) |         | ATTC        | TTC    | T      | A     | AT     | TTT    | AG    | TTT    | GGCG  | TGTG     | -      | A      | GACA  | AA    | TGAA  | GAAT   | TC     | AG   | AAG    | AGA   | GT    | TA   | ATAG | AAAT | GT    | AT   | AT   | CA  | ACT | T   |     |    |    |    |   |
|                                                         |         | Section 231 |        |        |       |        |        |       |        |       |          |        |        |       |       |       |        |        |      |        |       |       |      |      |      |       |      |      |     |     |     |     |    |    |    |   |
|                                                         | (18401) | 18401       | 18410  | 18420  | 18430 | 18440  | 18450  | 18460 | 18470  | 18480 |          |        |        |       |       |       |        |        |      |        |       |       |      |      |      |       |      |      |     |     |     |     |    |    |    |   |
| SARS-CoV-2 Reference Genome NC_045512.2 (18207)         |         | TAT         | GAT    | GGG    | TTT   | TAA    | AAAT   | GAAT  | TATC   | AA    | GT       | T      | AAT    | GG    | T     | AC    | CC     | TA     | ACAT | TG     | T     | TTAT  | CA   | CCC  | G    | CGA   | AGA  | AG   | CT  | ATA | AG  | AC  | AT | G  |    |   |
| Sulfolobus turreted icosahedral virus NC_005892 (13930) |         | GAG         | GAT    | TTT    | TT    | CCT    | AGCC   | GGA   | TAGA   | AAAT  | G        | AAT    | CC     | T     | G     | AC    | GA     | TA     | TG   | TG     | G     | TTAT  | TA   | TTGG | T    | ----- | AG   | --   | AAA | -   | GCG | AAG |    |    |    |   |

SARS-CoV-2 & Sulfolobus turreted icosahedral virus.apr

|                                                 |         |             |               |           |               |          |             |               |            |                        |  |
|-------------------------------------------------|---------|-------------|---------------|-----------|---------------|----------|-------------|---------------|------------|------------------------|--|
|                                                 |         | Section 232 |               |           |               |          |             |               |            |                        |  |
|                                                 | (18481) | 18481       | 18490         | 18500     | 18510         | 18520    | 18530       | 18540         | 18550      | 18560                  |  |
| SARS-CoV-2 Reference Genome NC_045512.2         | (18287) | TAC         | GTGCATGGATTGG | CTT       | CGATGTC       | GAGGGGTG | TCATGCTACT  | TAGAGAAGCTGTT | GGTACCAA   | TTTACCTTTACAGCTA       |  |
| Sulfolobus turreted icosahedral virus NC_005892 | (14002) | CG          | GTAAAGA-GCTAC | -CTT--AT  | TAAAGCATTACT  | TTATTC   | AGTTCCTTAAG | -----GCTCA    | CAAATCTCT  | CTT-ACATAAT            |  |
|                                                 |         | Section 233 |               |           |               |          |             |               |            |                        |  |
|                                                 | (18561) | 18561       | 18570         | 18580     | 18590         | 18600    | 18610       | 18620         | 18630      | 18640                  |  |
| SARS-CoV-2 Reference Genome NC_045512.2         | (18367) | G           | GTTTTCTACAGG  | TGTAA     | CCTAGT        | TCTGTACC | TACAGGTTAT  | GTTGATAC      | ACCTAA     | TAA                    |  |
| Sulfolobus turreted icosahedral virus NC_005892 | (14071) | A           | GTGACATAA     | TCTTCTAA  | GA-AGT        | GTTT     | CAGAA       | TAC           | TCAAA      | ATTCGGGTATAA-TGT       |  |
|                                                 |         | Section 234 |               |           |               |          |             |               |            |                        |  |
|                                                 | (18641) | 18641       | 18650         | 18660     | 18670         | 18680    | 18690       | 18700         | 18710      | 18720                  |  |
| SARS-CoV-2 Reference Genome NC_045512.2         | (18447) | TAG         | TG-CTAAAC     | CAACCGCC  | TGGAGATCA     | ATTTAA   | ACACCTCA    | TACCACT       | TATGTACAA  | AGGACTT                |  |
| Sulfolobus turreted icosahedral virus NC_005892 | (14145) | TAG         | TTTCCAAAC     | AAATA-TG  | TTGTTCG       | TGTAT    | GATAGAGAAAA | AAATGATG      | TATTTTTTG  | AAAATT--ATGGAATG       |  |
|                                                 |         | Section 235 |               |           |               |          |             |               |            |                        |  |
|                                                 | (18721) | 18721       | 18730         | 18740     | 18750         | 18760    | 18770       | 18780         | 18790      | 18800                  |  |
| SARS-CoV-2 Reference Genome NC_045512.2         | (18526) | CGTA        | TAAAGATTGTAC  | AAATGTTAA | GTTGACAC      | ACTTAA   | AAATCTCTCT  | GACAGAGTCG    | TATTTGTCT  | TATGGGCACATGG          |  |
| Sulfolobus turreted icosahedral virus NC_005892 | (14222) | AAAT        | TACACGCCAAGA  | AAATG     | GGGAACT-AGTGT | CTCA     | TTATA----   | GATGAAGCT-    | TACTATCACT | TTAAGTATA-GG           |  |
|                                                 |         | Section 236 |               |           |               |          |             |               |            |                        |  |
|                                                 | (18801) | 18801       | 18810         | 18820     | 18830         | 18840    | 18850       | 18860         | 18870      | 18880                  |  |
| SARS-CoV-2 Reference Genome NC_045512.2         | (18606) | C           | TTTGAGT       | TGACAT    | CTATGA        | AGTAT    | TTTGTG      | AAAAATAGGA    | ACCTGAGC   | GCACCTGTTGTCTATGT      |  |
| Sulfolobus turreted icosahedral virus NC_005892 | (14294) | C           | AGAAAGTA-AC   | GCGGCA    | ATCGAT        | GAGGC    | -----A-CT   | ACATGC        | GAATCGACA  | CGCAGGGATAGGGCTTATATTA |  |
|                                                 |         | Section 237 |               |           |               |          |             |               |            |                        |  |
|                                                 | (18881) | 18881       | 18890         | 18900     | 18910         | 18920    | 18930       | 18940         | 18950      | 18960                  |  |
| SARS-CoV-2 Reference Genome NC_045512.2         | (18685) | T           | GCTTTTCC      | ACTGCTT   | CAGACA        | CTTATGCC | TGTTGG      | CATCATT       | CTATTG     | GATTTGATTACGTCTATAAT   |  |
| Sulfolobus turreted icosahedral virus NC_005892 | (14363) | A           | GTACACAGA     | GAGTCT    | -ATGAT        | CTAATGCC | GATTGT      | CTACA         | ACAAGCA    | GATCTCATTA             |  |
|                                                 |         | Section 238 |               |           |               |          |             |               |            |                        |  |
|                                                 | (18961) | 18961       | 18970         | 18980     | 18990         | 19000    | 19010       | 19020         | 19030      | 19040                  |  |
| SARS-CoV-2 Reference Genome NC_045512.2         | (18765) | T           | GATGTTCA      | ACAAAT    | TGGGT         | TTTACAG  | GTAACC      | TACAAAG       | CAACCAT    | GATCTGTAT              |  |
| Sulfolobus turreted icosahedral virus NC_005892 | (14442) | T           | AATGA--ACT    | AAAGT     | GGATCT        | CAAA     | GTA         | CATTAG        | CACGGAAG   | CAGCAGAGAAAGTGAA       |  |

SARS-CoV-2 & Sulfolobus turreted icosahedral virus.apr

|                                                         |         |             |         |         |         |       |        |           |             |       |          |        |          |         |        |          |        |      |     |    |    |     |    |   |   |   |   |   |   |    |      |   |   |   |   |   |   |     |   |
|---------------------------------------------------------|---------|-------------|---------|---------|---------|-------|--------|-----------|-------------|-------|----------|--------|----------|---------|--------|----------|--------|------|-----|----|----|-----|----|---|---|---|---|---|---|----|------|---|---|---|---|---|---|-----|---|
|                                                         |         | Section 239 |         |         |         |       |        |           |             |       |          |        |          |         |        |          |        |      |     |    |    |     |    |   |   |   |   |   |   |    |      |   |   |   |   |   |   |     |   |
|                                                         | (19041) | 19041       | 19050   | 19060   | 19070   | 19080 | 19090  | 19100     | 19110       | 19120 |          |        |          |         |        |          |        |      |     |    |    |     |    |   |   |   |   |   |   |    |      |   |   |   |   |   |   |     |   |
| SARS-CoV-2 Reference Genome NC_045512.2 (18845)         |         | TAGCTAGT    | TGTGAT  | GCAATC  | ATGAC   | TAG   | GTGTC  | TAG       | CTGTCCACG   | AGTGC | TTTGT    | TAAAG  | CG-TG    | TTGACT  | GGACT  | ATT      | GA     |      |     |    |    |     |    |   |   |   |   |   |   |    |      |   |   |   |   |   |   |     |   |
| Sulfolobus turreted icosahedral virus NC_005892 (14515) |         | TACTT       | TTTGAT  | ----    | TATGAC  | ---   | GTGAA  | TAG       | TCAAATGAT   | AAAAA | TACATA   | AAGC   | CGAT     | TTGA    | --     | GAAAA    | ATT    | TT   |     |    |    |     |    |   |   |   |   |   |   |    |      |   |   |   |   |   |   |     |   |
|                                                         |         | Section 240 |         |         |         |       |        |           |             |       |          |        |          |         |        |          |        |      |     |    |    |     |    |   |   |   |   |   |   |    |      |   |   |   |   |   |   |     |   |
|                                                         | (19121) | 19121       | 19130   | 19140   | 19150   | 19160 | 19170  | 19180     | 19190       | 19200 |          |        |          |         |        |          |        |      |     |    |    |     |    |   |   |   |   |   |   |    |      |   |   |   |   |   |   |     |   |
| SARS-CoV-2 Reference Genome NC_045512.2 (18924)         |         | ATATCC      | TAT     | AATTG   | GTGATG  | AAC   | TGAAG  | ATTAA     | TGCGG       | CTTG  | TAGAAAGG | TTCAAC | ACAT     | TGGTTGT | T      | AAAGCTGC | ATTAT  | T    |     |    |    |     |    |   |   |   |   |   |   |    |      |   |   |   |   |   |   |     |   |
| Sulfolobus turreted icosahedral virus NC_005892 (14582) |         | TAAAGA      | TAGA    | ----    | GAGA    | G-AA  | TATCC  | ATGGT     | TGTAT       | CCCC  | TCTCCTTT | TTT    | TTTG     | ACT     | TCTGAT | TGAA     | CCGCTT | AGGC | T   |    |    |     |    |   |   |   |   |   |   |    |      |   |   |   |   |   |   |     |   |
|                                                         |         | Section 241 |         |         |         |       |        |           |             |       |          |        |          |         |        |          |        |      |     |    |    |     |    |   |   |   |   |   |   |    |      |   |   |   |   |   |   |     |   |
|                                                         | (19201) | 19201       | 19210   | 19220   | 19230   | 19240 | 19250  | 19260     | 19270       | 19280 |          |        |          |         |        |          |        |      |     |    |    |     |    |   |   |   |   |   |   |    |      |   |   |   |   |   |   |     |   |
| SARS-CoV-2 Reference Genome NC_045512.2 (19004)         |         | TAGCAG      | ACAAATT | CC      | CAGTTCT | TACG  | ACATTG | GT        | AAC         | CC    | TAAAGC   | TATTA  | AGTGTGTA | CCTC    | --     | AAGC     | TGATGT | TAG  | AAT |    |    |     |    |   |   |   |   |   |   |    |      |   |   |   |   |   |   |     |   |
| Sulfolobus turreted icosahedral virus NC_005892 (14657) |         | GAGTTC      | ATAAATT | TT      | CTGAAAC | TCTC  | ATATTG | AA        | AAC         | --    | TTGT     | TTTCAT | AGCAGAAT | CCAC    | GTTTTT | TG       | TCC    | TCA  | AAT |    |    |     |    |   |   |   |   |   |   |    |      |   |   |   |   |   |   |     |   |
|                                                         |         | Section 242 |         |         |         |       |        |           |             |       |          |        |          |         |        |          |        |      |     |    |    |     |    |   |   |   |   |   |   |    |      |   |   |   |   |   |   |     |   |
|                                                         | (19281) | 19281       | 19290   | 19300   | 19310   | 19320 | 19330  | 19340     | 19350       | 19360 |          |        |          |         |        |          |        |      |     |    |    |     |    |   |   |   |   |   |   |    |      |   |   |   |   |   |   |     |   |
| SARS-CoV-2 Reference Genome NC_045512.2 (19082)         |         | GGAA        | GTTCT   | ATGAT   | GCA     | AGCC  | TT     | GT        | AGTGACAAAGC | TT    | A        | TAA    | A        | TAG     | A      | GAA      | TTA    | TT   | C   | T  | A  | T   | T  | C | T | A | T | G | C | A  | C    | A | T | T | C | T |   |     |   |
| Sulfolobus turreted icosahedral virus NC_005892 (14735) |         | GT          | AAA     | --AA    | AAC     | ATAG  | AA     | ATTT      | TAG         | AA    | ATTT     | TGTT   | --       | TT      | C      | T        | CA     | TAT  | G   | AT | AA | GGT | TT | A | T | A | G | C | G | AA | AAAA | C | T | A | C | A | T | --- |   |
|                                                         |         | Section 243 |         |         |         |       |        |           |             |       |          |        |          |         |        |          |        |      |     |    |    |     |    |   |   |   |   |   |   |    |      |   |   |   |   |   |   |     |   |
|                                                         | (19361) | 19361       | 19370   | 19380   | 19390   | 19400 | 19410  | 19420     | 19430       | 19440 |          |        |          |         |        |          |        |      |     |    |    |     |    |   |   |   |   |   |   |    |      |   |   |   |   |   |   |     |   |
| SARS-CoV-2 Reference Genome NC_045512.2 (19162)         |         | GACA        | AATT    | CACAGAT | GGT     | GT    | AT     | GCCTATTTT | G           | GA    | ATT      | GC     | ATG      | TCGATA  | GAT    | AT       | CC     | TG   | C   | T  | A  | T   | T  | C | C | A | T | T | G | T  | T    | G | T | A | G | A | T | T   |   |
| Sulfolobus turreted icosahedral virus NC_005892 (14808) |         | --AG        | A       | TT      | TTTTTT  | G     | A      | G         | A           | A     | A        | A      | A        | A       | A      | A        | A      | A    | A   | A  | A  | A   | A  | A | A | A | A | A | A | A  | A    | A | A | A | A | A | A |     |   |
|                                                         |         | Section 244 |         |         |         |       |        |           |             |       |          |        |          |         |        |          |        |      |     |    |    |     |    |   |   |   |   |   |   |    |      |   |   |   |   |   |   |     |   |
|                                                         | (19441) | 19441       | 19450   | 19460   | 19470   | 19480 | 19490  | 19500     | 19510       | 19520 |          |        |          |         |        |          |        |      |     |    |    |     |    |   |   |   |   |   |   |    |      |   |   |   |   |   |   |     |   |
| SARS-CoV-2 Reference Genome NC_045512.2 (19242)         |         | TGACAC      | TAG     | GTGCTAT | CTAAC   | CT    | TA     | ACT       | TGCCTGG     | TT    | GT       | GA     | TGGT     | GGC     | A      | GTTT     | GT     | ATGT | AAA | T  | AA | ACA | -T | G | C | A | T | C | A | C  | A    | C | A | C | A | C |   |     |   |
| Sulfolobus turreted icosahedral virus NC_005892 (14880) |         | TCGGTG      | TA      | TG      | G       | C     | A      | G         | G           | A     | CTAAC    | T      | C        | TA      | ---    | T        | A      | T    | A   | A  | A  | T   | C  | G | T | A | A | A | C | T  | A    | T | G | A | A | A | A | A   |   |
|                                                         |         | Section 245 |         |         |         |       |        |           |             |       |          |        |          |         |        |          |        |      |     |    |    |     |    |   |   |   |   |   |   |    |      |   |   |   |   |   |   |     |   |
|                                                         | (19521) | 19521       | 19530   | 19540   | 19550   | 19560 | 19570  | 19580     | 19590       | 19600 |          |        |          |         |        |          |        |      |     |    |    |     |    |   |   |   |   |   |   |    |      |   |   |   |   |   |   |     |   |
| SARS-CoV-2 Reference Genome NC_045512.2 (19321)         |         | ACA         | CCAG    | C       | T       | T     | T      | G         | A           | T     | A        | A      | A        | G       | T      | G        | C      | T    | T   | T  | G  | T   | A  | A | T | T | A | A | A | A  | A    | A | A | A | A | A | A | A   |   |
| Sulfolobus turreted icosahedral virus NC_005892 (14957) |         | ACA         | G       | A       | G       | A     | C      | A         | T           | T     | -        | -      | A        | C       | A      | A        | C      | A    | G   | A  | -  | C   | T  | T | A | - | T | G | C | G  | T    | G | A | C | T | G | A | C   | T |

SARS-CoV-2 & Sulfolobus turreted icosahedral virus.apr

|                                                         |         |          |          |          |           |             |                                           |                                          |                                               |
|---------------------------------------------------------|---------|----------|----------|----------|-----------|-------------|-------------------------------------------|------------------------------------------|-----------------------------------------------|
| Section 246                                             |         |          |          |          |           |             |                                           |                                          |                                               |
|                                                         | (19601) | 19601    | 19610    | 19620    | 19630     | 19640       | 19650                                     | 19660                                    | 19670 19680                                   |
| SARS-CoV-2 Reference Genome NC_045512.2 (19400)         | CTC     | ATGGAA   | AAAC     | AAGTA    | GTG       | TCAG        | ATATAGATT                                 | ATG                                      | TACCACTAAAGTCTGCTACGTGTATTAACACGTTCGAATTAGGT  |
| Sulfolobus turreted icosahedral virus NC_005892 (15031) | --T     | ATCAG    | AAA      | GAATTAG  | GGT       | TCAG        | CTAATAGG--ATCTATTTCTAA                    | TAGCGGTACTGCCGCTGTAACTCTTCATCAGCGC       |                                               |
| Section 247                                             |         |          |          |          |           |             |                                           |                                          |                                               |
|                                                         | (19681) | 19681    | 19690    | 19700    | 19710     | 19720       | 19730                                     | 19740                                    | 19750 19760                                   |
| SARS-CoV-2 Reference Genome NC_045512.2 (19480)         | GGTGC   | TGT      | CTGTAG   | ACATCA   | TGCTAAT   | GAGTACAGATT | G-TATCTCGATGCTTATAACATGATGATCTCAGCTGGCTTT |                                          |                                               |
| Sulfolobus turreted icosahedral virus NC_005892 (15108) | CT--    | TTC      | CCATACA  | AATT     | TAGTGC    | AGACGTT     | TAACCTTGA                                 | GC                                       | TATGAAGG-CTCAAAGACTCTTTATTCAGTCTCGGTTAC       |
| Section 248                                             |         |          |          |          |           |             |                                           |                                          |                                               |
|                                                         | (19761) | 19761    | 19770    | 19780    | 19790     | 19800       | 19810                                     | 19820                                    | 19830 19840                                   |
| SARS-CoV-2 Reference Genome NC_045512.2 (19558)         | AGCT    | TGTGG    | GT       | TTACAA-- | ACAAT--   | TTGAT       | ACTTATA                                   | AACCTCTGGAACACTTTTACAAGACTTCA            | GAGTTTAGAAAAT                                 |
| Sulfolobus turreted icosahedral virus NC_005892 (15184) | AGG     | TCTGG    | CA       | TTTTAA   | TGT       | ACT         | ATAC                                      | TACAAAGGACAGAA                           | TCAGCATACCCC                                  |
| Section 249                                             |         |          |          |          |           |             |                                           |                                          |                                               |
|                                                         | (19841) | 19841    | 19850    | 19860    | 19870     | 19880       | 19890                                     | 19900                                    | 19910 19920                                   |
| SARS-CoV-2 Reference Genome NC_045512.2 (19633)         | G       | TGGCTTT  | AATG     | TTGTAA   | TAAGGG    | ACAC        | TTTGA                                     | TGGACAA                                  | CAGGGTGAAGTACCACTTTCTATCATTAATAACACTGT        |
| Sulfolobus turreted icosahedral virus NC_005892 (15264) | C       | TGG--TT  | AGTGA    | AAT--CT  | TAA       | CTAATG      | TGGGA                                     | ATTTCGATCTAGCTAGATTCCCTGCTACAAATGGT-TCAA | AAATATTT                                      |
| Section 250                                             |         |          |          |          |           |             |                                           |                                          |                                               |
|                                                         | (19921) | 19921    | 19930    | 19940    | 19950     | 19960       | 19970                                     | 19980                                    | 19990 20000                                   |
| SARS-CoV-2 Reference Genome NC_045512.2 (19713)         | T       | TACACAAA | AGTT--G  | AT       | GGTGTGATG | TAGAAT      | TGT                                       | TTGAAAA                                  | TAAACACAT-TACCTGTTAATGTAGCATTTGAG             |
| Sulfolobus turreted icosahedral virus NC_005892 (15338) | A       | TACT     | CAGCATTT | TGAC     | AG        | GACAGGCGCC  | TAG                                       | CGGTGTCTCCATAA                           | ACGCTAGTTCTTACATAAACAAATACATATGAAAG           |
| Section 251                                             |         |          |          |          |           |             |                                           |                                          |                                               |
|                                                         | (20001) | 20001    | 20010    | 20020    | 20030     | 20040       | 20050                                     | 20060                                    | 20070 20080                                   |
| SARS-CoV-2 Reference Genome NC_045512.2 (19789)         | CT      | TGGGCT   | AAGC     | GAA      | CAATTA    | AAACC       | AGTACCA                                   | GAGGT                                    | GAAAAATAC                                     |
| Sulfolobus turreted icosahedral virus NC_005892 (15418) | AG      | TAA      | CAGC     | ACAG     | GAA       | ATTA        | AGT                                       | AGGGAGG                                  | GTTAGCGCAGACGGTGAATGCC--TCTCGCTACGGTCTTACCGAA |
| Section 252                                             |         |          |          |          |           |             |                                           |                                          |                                               |
|                                                         | (20081) | 20081    | 20090    | 20100    | 20110     | 20120       | 20130                                     | 20140                                    | 20150 20160                                   |
| SARS-CoV-2 Reference Genome NC_045512.2 (19869)         | T       | GTGATC   | TGG      | ACTAC    | AAAGAG    | ATGCT       | CCAG                                      | CACATAT-ATCTACTAT                        | TGGTGTGTTCTATGACTGACATAGCCAG                  |
| Sulfolobus turreted icosahedral virus NC_005892 (15496) | G       | GT       | ATC      | GAG-AT   | CTCA      | ATTT        | AACG                                      | TACCG                                    | CTAGC                                         |

SARS-CoV-2 & Sulfolobus turreted icosahedral virus.apr

|                                                         |           |           |             |            |              |            |          |           |           |
|---------------------------------------------------------|-----------|-----------|-------------|------------|--------------|------------|----------|-----------|-----------|
| Section 253                                             |           |           |             |            |              |            |          |           |           |
| (20161)                                                 | 20161     | 20170     | 20180       | 20190      | 20200        | 20210      | 20220    | 20230     | 20240     |
| SARS-CoV-2 Reference Genome NC_045512.2 (19948)         | AAACCAACT | GAAACGA   | -TTTGTGCACC | ACTCAGTGT  | CTTTTTTGATGG | TAGAGTTGAT | GGTCAAGT | TAGACTTAT | TAGAA     |
| Sulfolobus turreted icosahedral virus NC_005892 (15574) | ATAAAGAG  | GCAAGTTAG | TTTATGTGAT  | AAACAGTAC  | CTCAGGAATCAA | TACACAGAT  | CCAACCGA | ATATGAGC  | TAAAA     |
| Section 254                                             |           |           |             |            |              |            |          |           |           |
| (20241)                                                 | 20241     | 20250     | 20260       | 20270      | 20280        | 20290      | 20300    | 20310     | 20320     |
| SARS-CoV-2 Reference Genome NC_045512.2 (20027)         | ATGCCCCG  | TAATGGTGT | CTTA-TTACAG | AAAGGTAG   | TGTTAAAGG    | TTACA--AC  | CATCTGT  | TAGGTCCC  | AAACAAGCT |
| Sulfolobus turreted icosahedral virus NC_005892 (15654) | TGT---TA  | GAGGTGTAC | CAACTGACA   | AAATCAAG   | GTAAGTTGG    | GCTGCTCTT  | CAGGCAGA | -----G    | AAACAAGCT |
| Section 255                                             |           |           |             |            |              |            |          |           |           |
| (20321)                                                 | 20321     | 20330     | 20340       | 20350      | 20360        | 20370      | 20380    | 20390     | 20400     |
| SARS-CoV-2 Reference Genome NC_045512.2 (20104)         | CTTAATG   | GAGTCAC   | -ATTAA      | TGGAGAAG   | CCGTAA       | AAACACAG   | TTCAATTA | TATAAG    | AAAGTTGAT |
| Sulfolobus turreted icosahedral virus NC_005892 (15725) | TATCA-A   | GTAGCAC   | ATATAG      | TGGAGCTT   | CCGCCATC     | ATTGAC     | TTTAGGAA | ATATTTT   | AAATGGC   |
| Section 256                                             |           |           |             |            |              |            |          |           |           |
| (20401)                                                 | 20401     | 20410     | 20420       | 20430      | 20440        | 20450      | 20460    | 20470     | 20480     |
| SARS-CoV-2 Reference Genome NC_045512.2 (20183)         | AATTACCT  | GAACTTAC  | CTTTACTC    | AGAGTAGA   | AAATTTACA    | AGAATTAA   | ACCAAGG  | AG--TC    | ---AATG   |
| Sulfolobus turreted icosahedral virus NC_005892 (15804) | ACGCTCC   | GTCAGATAG | CATAGAAT    | ACGATCT    | AGCTTTACA    | -GAATCA    | AGACAA   | TGTATAC   | TCCTCTAT  |
| Section 257                                             |           |           |             |            |              |            |          |           |           |
| (20481)                                                 | 20481     | 20490     | 20500       | 20510      | 20520        | 20530      | 20540    | 20550     | 20560     |
| SARS-CoV-2 Reference Genome NC_045512.2 (20258)         | TCTTAGA   | AATTAGC   | TATGGAT     | GAATTCAT   | TGAACGG      | TATAAAT    | TAGAGGC  | TATGCTT   | CGAACAT   |
| Sulfolobus turreted icosahedral virus NC_005892 (15883) | GCTTCC    | AATACTA   | CATCA       | ACTCGCAGCG | TTACCTG      | CTCAAG     | TAGCAGCA | ATAGTAC   | AAC-AA    |
| Section 258                                             |           |           |             |            |              |            |          |           |           |
| (20561)                                                 | 20561     | 20570     | 20580       | 20590      | 20600        | 20610      | 20620    | 20630     | 20640     |
| SARS-CoV-2 Reference Genome NC_045512.2 (20338)         | TTTAGTCAT | AGTCAGT   | TAGGTG      | GTTTAC     | ATCTACT      | GATTTGGAC  | TAGCTAA  | CGTTTAA   | GGAATCA   |
| Sulfolobus turreted icosahedral virus NC_005892 (15962) | AGAAGGATA | AAG-AGA   | TAGATG      | AGGTA      | -AGAT---     | GTC        | TTTTTT   | TTTGAGGA  | TTGTTTAA  |
| Section 259                                             |           |           |             |            |              |            |          |           |           |
| (20641)                                                 | 20641     | 20650     | 20660       | 20670      | 20680        | 20690      | 20700    | 20710     | 20720     |
| SARS-CoV-2 Reference Genome NC_045512.2 (20418)         | AGATTTTAT | TCCTATGGA | CAGTACAG    | TTAAAACT   | ATTTCTA      | TAAAGAT    | GCGCAAA  | CAGGTTC   | ATCTAA    |
| Sulfolobus turreted icosahedral virus NC_005892 (16037) | TAATTTTAC | T-AAACAAG | CTAA        | AAAAATC    | AAATTT       | CTGACGT    | AGAAA    | A-GTAATC  | --CAGAAAG |

SARS-CoV-2 & Sulfolobus turreted icosahedral virus.apr

|                                                 |         |             |        |        |       |       |       |       |        |       |      |
|-------------------------------------------------|---------|-------------|--------|--------|-------|-------|-------|-------|--------|-------|------|
|                                                 |         | Section 260 |        |        |       |       |       |       |        |       |      |
|                                                 | (20721) | 20721       | 20730  | 20740  | 20750 | 20760 | 20770 | 20780 | 20790  | 20800 |      |
| SARS-CoV-2 Reference Genome NC_045512.2         | (20498) | CTGT        | TATTG  | ATTATT | ACTTG | ATGAT | TTTGT | TGA   | AAATA  | ATAAA | ATCC |
| Sulfolobus turreted icosahedral virus NC_005892 | (16112) | GAAAT       | -TTT   | ACC    | TACC  | AC    | TGT   | -CCA  | TCT    | ACC   | AA   |
|                                                 |         | Section 261 |        |        |       |       |       |       |        |       |      |
|                                                 | (20801) | 20801       | 20810  | 20820  | 20830 | 20840 | 20850 | 20860 | 20870  | 20880 |      |
| SARS-CoV-2 Reference Genome NC_045512.2         | (20578) | GTG         | ACTATT | GACT   | ATAC  | AG    | AAATT | TC    | ATTTAT | GCTTT | GGTG |
| Sulfolobus turreted icosahedral virus NC_005892 | (16185) | GTAA        | TCCAGA | AAG    | ATA   | T     | -ACT  | CA    | TC     | ACC   | GAAA |
|                                                 |         | Section 262 |        |        |       |       |       |       |        |       |      |
|                                                 | (20881) | 20881       | 20890  | 20900  | 20910 | 20920 | 20930 | 20940 | 20950  | 20960 |      |
| SARS-CoV-2 Reference Genome NC_045512.2         | (20658) | ATCT        | AGTC   | AAGC   | G     | TGCA  | ACCG  | GGT   | GT     | TGCT  | ATG  |
| Sulfolobus turreted icosahedral virus NC_005892 | (16253) | TCAA        | ATCG   | AAGC   | AG    | GAAT  | AGG   | T     | -ACG   | TAGA  | AAA  |
|                                                 |         | Section 263 |        |        |       |       |       |       |        |       |      |
|                                                 | (20961) | 20961       | 20970  | 20980  | 20990 | 21000 | 21010 | 21020 | 21030  | 21040 |      |
| SARS-CoV-2 Reference Genome NC_045512.2         | (20738) | TTCA        | AAAT   | TAT    | GGT   | G     | ATAG  | TG    | CAAC   | AT    | TAC  |
| Sulfolobus turreted icosahedral virus NC_005892 | (16327) | TAC         | ACC    | T      | -GT   | CC    | AT    | CT    | AC     | CAA   | ATA  |
|                                                 |         | Section 264 |        |        |       |       |       |       |        |       |      |
|                                                 | (21041) | 21041       | 21050  | 21060  | 21070 | 21080 | 21090 | 21100 | 21110  | 21120 |      |
| SARS-CoV-2 Reference Genome NC_045512.2         | (20818) | TTAA        | AC     | CAT    | TAA   | CA    | TTAG  | CT    | GTAC   | CC    | TAT  |
| Sulfolobus turreted icosahedral virus NC_005892 | (16395) | TTAA        | AC     | GAT    | G     | T     | -G    | CA    | AA     | AG    | GCT  |
|                                                 |         | Section 265 |        |        |       |       |       |       |        |       |      |
|                                                 | (21121) | 21121       | 21130  | 21140  | 21150 | 21160 | 21170 | 21180 | 21190  | 21200 |      |
| SARS-CoV-2 Reference Genome NC_045512.2         | (20898) | AGG         | TAC    | GAG    | CT    | TTTA  | AG    | AC    | AGT    | GG    | TT   |
| Sulfolobus turreted icosahedral virus NC_005892 | (16467) | -GGT        | G      | CAG    | C     | -     | -     | -     | -      | -     | -    |
|                                                 |         | Section 266 |        |        |       |       |       |       |        |       |      |
|                                                 | (21201) | 21201       | 21210  | 21220  | 21230 | 21240 | 21250 | 21260 | 21270  | 21280 |      |
| SARS-CoV-2 Reference Genome NC_045512.2         | (20978) | CAG         | ATT    | CA     | ACT   | TG    | ATT   | GT    | G      | CA    | CT   |
| Sulfolobus turreted icosahedral virus NC_005892 | (16537) | CAG         | TAGA   | A      | CA    | AG    | T     | AG    | AA     | T     | CA   |

SARS-CoV-2 & Sulfolobus turreted icosahedral virus.apr

|                                                         |         |         |       |       |        |        |       |        |               |         |     |       |       |       |        |      |     |     |     |      |      |     |      |     |    |     |     |    |      |      |     |     |     |    |      |      |     |   |    |   |    |   |     |     |    |     |   |   |   |    |   |     |    |   |   |   |   |   |   |   |   |   |   |   |   |   |   |   |   |   |   |   |   |   |   |   |   |   |   |   |   |   |   |   |   |   |   |   |   |   |   |   |   |   |   |   |   |   |   |   |   |   |   |   |   |   |   |   |   |   |   |   |   |   |   |   |   |   |   |   |   |   |   |   |   |   |   |   |   |   |   |   |   |   |   |   |   |   |   |   |   |   |   |   |   |   |   |   |   |   |   |   |   |   |   |   |   |   |   |   |   |   |   |   |   |   |   |   |   |   |   |   |   |   |   |   |   |   |   |   |   |   |   |   |   |   |   |   |   |   |   |   |   |   |   |   |   |   |   |   |   |   |   |   |   |   |   |   |   |   |   |   |   |   |   |   |   |   |   |   |   |   |   |   |   |   |   |   |   |   |   |   |   |   |   |   |   |   |   |   |   |   |   |   |   |   |   |   |   |   |   |   |   |   |   |   |   |   |   |   |   |   |   |   |   |   |   |   |   |   |   |   |   |   |   |   |   |   |   |   |   |   |   |   |   |   |   |   |   |   |   |   |   |   |   |   |   |   |   |   |   |   |   |   |   |   |   |   |   |   |   |   |   |   |   |   |   |   |   |   |   |   |   |   |   |   |   |   |   |   |   |   |   |   |   |   |   |   |   |   |   |   |   |   |   |   |   |   |   |   |   |   |   |   |   |   |   |   |   |   |   |   |   |   |   |   |   |   |   |   |   |   |   |   |   |   |   |   |   |   |   |   |   |   |   |   |   |   |   |   |   |   |   |   |   |   |   |   |   |   |   |   |   |   |   |   |   |   |   |   |   |   |   |   |   |   |   |   |   |   |   |   |   |   |   |   |   |   |   |   |   |   |   |   |   |   |   |   |   |   |   |   |   |   |   |   |   |   |   |   |   |   |   |   |   |   |   |   |   |   |   |   |   |   |   |   |   |   |   |   |   |   |   |   |   |   |   |   |   |   |   |   |   |   |   |   |   |   |   |   |   |   |   |   |   |   |   |   |   |   |   |   |   |   |   |   |   |   |   |   |   |   |   |   |   |   |   |   |   |   |   |   |   |   |   |   |   |   |   |   |   |   |   |   |   |   |   |   |   |   |   |   |   |   |   |   |   |   |   |   |   |   |   |   |   |   |   |   |   |   |   |   |   |   |   |   |   |   |   |   |   |   |   |   |   |   |   |   |   |   |   |   |   |   |   |   |   |   |   |   |   |   |   |   |   |   |   |   |   |   |   |   |   |   |   |   |   |   |   |   |   |   |   |   |   |   |   |   |   |   |   |   |   |   |   |   |   |   |   |   |   |   |   |   |   |   |   |   |   |   |   |   |   |   |   |   |   |   |   |   |   |   |   |   |   |   |   |   |   |   |   |   |   |   |   |   |   |   |   |   |   |   |   |   |   |   |   |   |   |   |   |   |   |   |   |   |   |   |   |   |   |   |   |   |   |   |   |   |   |   |   |   |   |   |   |   |   |   |   |   |   |   |   |   |   |   |   |   |   |   |   |   |   |   |   |   |   |   |   |   |   |   |   |   |   |   |   |   |   |   |   |   |   |   |   |   |   |   |   |   |   |   |   |   |   |   |   |   |   |   |   |   |   |   |   |   |   |   |   |   |   |
|---------------------------------------------------------|---------|---------|-------|-------|--------|--------|-------|--------|---------------|---------|-----|-------|-------|-------|--------|------|-----|-----|-----|------|------|-----|------|-----|----|-----|-----|----|------|------|-----|-----|-----|----|------|------|-----|---|----|---|----|---|-----|-----|----|-----|---|---|---|----|---|-----|----|---|---|---|---|---|---|---|---|---|---|---|---|---|---|---|---|---|---|---|---|---|---|---|---|---|---|---|---|---|---|---|---|---|---|---|---|---|---|---|---|---|---|---|---|---|---|---|---|---|---|---|---|---|---|---|---|---|---|---|---|---|---|---|---|---|---|---|---|---|---|---|---|---|---|---|---|---|---|---|---|---|---|---|---|---|---|---|---|---|---|---|---|---|---|---|---|---|---|---|---|---|---|---|---|---|---|---|---|---|---|---|---|---|---|---|---|---|---|---|---|---|---|---|---|---|---|---|---|---|---|---|---|---|---|---|---|---|---|---|---|---|---|---|---|---|---|---|---|---|---|---|---|---|---|---|---|---|---|---|---|---|---|---|---|---|---|---|---|---|---|---|---|---|---|---|---|---|---|---|---|---|---|---|---|---|---|---|---|---|---|---|---|---|---|---|---|---|---|---|---|---|---|---|---|---|---|---|---|---|---|---|---|---|---|---|---|---|---|---|---|---|---|---|---|---|---|---|---|---|---|---|---|---|---|---|---|---|---|---|---|---|---|---|---|---|---|---|---|---|---|---|---|---|---|---|---|---|---|---|---|---|---|---|---|---|---|---|---|---|---|---|---|---|---|---|---|---|---|---|---|---|---|---|---|---|---|---|---|---|---|---|---|---|---|---|---|---|---|---|---|---|---|---|---|---|---|---|---|---|---|---|---|---|---|---|---|---|---|---|---|---|---|---|---|---|---|---|---|---|---|---|---|---|---|---|---|---|---|---|---|---|---|---|---|---|---|---|---|---|---|---|---|---|---|---|---|---|---|---|---|---|---|---|---|---|---|---|---|---|---|---|---|---|---|---|---|---|---|---|---|---|---|---|---|---|---|---|---|---|---|---|---|---|---|---|---|---|---|---|---|---|---|---|---|---|---|---|---|---|---|---|---|---|---|---|---|---|---|---|---|---|---|---|---|---|---|---|---|---|---|---|---|---|---|---|---|---|---|---|---|---|---|---|---|---|---|---|---|---|---|---|---|---|---|---|---|---|---|---|---|---|---|---|---|---|---|---|---|---|---|---|---|---|---|---|---|---|---|---|---|---|---|---|---|---|---|---|---|---|---|---|---|---|---|---|---|---|---|---|---|---|---|---|---|---|---|---|---|---|---|---|---|---|---|---|---|---|---|---|---|---|---|---|---|---|---|---|---|---|---|---|---|---|---|---|---|---|---|---|---|---|---|---|---|---|---|---|---|---|---|---|---|---|---|---|---|---|---|---|---|---|---|---|---|---|---|---|---|---|---|---|---|---|---|---|---|---|---|---|---|---|---|---|---|---|---|---|---|---|---|---|---|---|---|---|---|---|---|---|---|---|---|---|---|---|---|---|---|---|---|---|---|---|---|---|---|---|---|---|---|---|---|---|---|---|---|---|---|---|---|---|---|---|---|---|---|---|---|---|---|---|---|---|---|---|---|---|---|---|---|---|---|---|---|---|---|---|---|---|---|---|---|---|---|---|---|---|---|---|---|---|---|---|---|---|---|---|---|---|---|---|---|---|---|---|---|---|---|---|---|---|---|---|---|---|---|---|---|---|---|---|---|---|---|---|---|---|---|---|---|---|---|---|---|---|---|---|---|
| Section 267                                             |         |         |       |       |        |        |       |        |               |         |     |       |       |       |        |      |     |     |     |      |      |     |      |     |    |     |     |    |      |      |     |     |     |    |      |      |     |   |    |   |    |   |     |     |    |     |   |   |   |    |   |     |    |   |   |   |   |   |   |   |   |   |   |   |   |   |   |   |   |   |   |   |   |   |   |   |   |   |   |   |   |   |   |   |   |   |   |   |   |   |   |   |   |   |   |   |   |   |   |   |   |   |   |   |   |   |   |   |   |   |   |   |   |   |   |   |   |   |   |   |   |   |   |   |   |   |   |   |   |   |   |   |   |   |   |   |   |   |   |   |   |   |   |   |   |   |   |   |   |   |   |   |   |   |   |   |   |   |   |   |   |   |   |   |   |   |   |   |   |   |   |   |   |   |   |   |   |   |   |   |   |   |   |   |   |   |   |   |   |   |   |   |   |   |   |   |   |   |   |   |   |   |   |   |   |   |   |   |   |   |   |   |   |   |   |   |   |   |   |   |   |   |   |   |   |   |   |   |   |   |   |   |   |   |   |   |   |   |   |   |   |   |   |   |   |   |   |   |   |   |   |   |   |   |   |   |   |   |   |   |   |   |   |   |   |   |   |   |   |   |   |   |   |   |   |   |   |   |   |   |   |   |   |   |   |   |   |   |   |   |   |   |   |   |   |   |   |   |   |   |   |   |   |   |   |   |   |   |   |   |   |   |   |   |   |   |   |   |   |   |   |   |   |   |   |   |   |   |   |   |   |   |   |   |   |   |   |   |   |   |   |   |   |   |   |   |   |   |   |   |   |   |   |   |   |   |   |   |   |   |   |   |   |   |   |   |   |   |   |   |   |   |   |   |   |   |   |   |   |   |   |   |   |   |   |   |   |   |   |   |   |   |   |   |   |   |   |   |   |   |   |   |   |   |   |   |   |   |   |   |   |   |   |   |   |   |   |   |   |   |   |   |   |   |   |   |   |   |   |   |   |   |   |   |   |   |   |   |   |   |   |   |   |   |   |   |   |   |   |   |   |   |   |   |   |   |   |   |   |   |   |   |   |   |   |   |   |   |   |   |   |   |   |   |   |   |   |   |   |   |   |   |   |   |   |   |   |   |   |   |   |   |   |   |   |   |   |   |   |   |   |   |   |   |   |   |   |   |   |   |   |   |   |   |   |   |   |   |   |   |   |   |   |   |   |   |   |   |   |   |   |   |   |   |   |   |   |   |   |   |   |   |   |   |   |   |   |   |   |   |   |   |   |   |   |   |   |   |   |   |   |   |   |   |   |   |   |   |   |   |   |   |   |   |   |   |   |   |   |   |   |   |   |   |   |   |   |   |   |   |   |   |   |   |   |   |   |   |   |   |   |   |   |   |   |   |   |   |   |   |   |   |   |   |   |   |   |   |   |   |   |   |   |   |   |   |   |   |   |   |   |   |   |   |   |   |   |   |   |   |   |   |   |   |   |   |   |   |   |   |   |   |   |   |   |   |   |   |   |   |   |   |   |   |   |   |   |   |   |   |   |   |   |   |   |   |   |   |   |   |   |   |   |   |   |   |   |   |   |   |   |   |   |   |   |   |   |   |   |   |   |   |   |   |   |   |   |   |   |   |   |   |   |   |   |   |   |   |   |   |   |   |   |   |   |   |   |   |   |   |   |   |   |   |   |   |   |   |   |   |   |   |   |   |   |   |   |   |   |   |   |   |   |   |   |   |   |   |   |   |   |   |   |   |   |   |   |   |   |   |   |
|                                                         | (21281) | 21281   | 21290 | 21300 | 21310  | 21320  | 21330 | 21340  | 21350 21360   |         |     |       |       |       |        |      |     |     |     |      |      |     |      |     |    |     |     |    |      |      |     |     |     |    |      |      |     |   |    |   |    |   |     |     |    |     |   |   |   |    |   |     |    |   |   |   |   |   |   |   |   |   |   |   |   |   |   |   |   |   |   |   |   |   |   |   |   |   |   |   |   |   |   |   |   |   |   |   |   |   |   |   |   |   |   |   |   |   |   |   |   |   |   |   |   |   |   |   |   |   |   |   |   |   |   |   |   |   |   |   |   |   |   |   |   |   |   |   |   |   |   |   |   |   |   |   |   |   |   |   |   |   |   |   |   |   |   |   |   |   |   |   |   |   |   |   |   |   |   |   |   |   |   |   |   |   |   |   |   |   |   |   |   |   |   |   |   |   |   |   |   |   |   |   |   |   |   |   |   |   |   |   |   |   |   |   |   |   |   |   |   |   |   |   |   |   |   |   |   |   |   |   |   |   |   |   |   |   |   |   |   |   |   |   |   |   |   |   |   |   |   |   |   |   |   |   |   |   |   |   |   |   |   |   |   |   |   |   |   |   |   |   |   |   |   |   |   |   |   |   |   |   |   |   |   |   |   |   |   |   |   |   |   |   |   |   |   |   |   |   |   |   |   |   |   |   |   |   |   |   |   |   |   |   |   |   |   |   |   |   |   |   |   |   |   |   |   |   |   |   |   |   |   |   |   |   |   |   |   |   |   |   |   |   |   |   |   |   |   |   |   |   |   |   |   |   |   |   |   |   |   |   |   |   |   |   |   |   |   |   |   |   |   |   |   |   |   |   |   |   |   |   |   |   |   |   |   |   |   |   |   |   |   |   |   |   |   |   |   |   |   |   |   |   |   |   |   |   |   |   |   |   |   |   |   |   |   |   |   |   |   |   |   |   |   |   |   |   |   |   |   |   |   |   |   |   |   |   |   |   |   |   |   |   |   |   |   |   |   |   |   |   |   |   |   |   |   |   |   |   |   |   |   |   |   |   |   |   |   |   |   |   |   |   |   |   |   |   |   |   |   |   |   |   |   |   |   |   |   |   |   |   |   |   |   |   |   |   |   |   |   |   |   |   |   |   |   |   |   |   |   |   |   |   |   |   |   |   |   |   |   |   |   |   |   |   |   |   |   |   |   |   |   |   |   |   |   |   |   |   |   |   |   |   |   |   |   |   |   |   |   |   |   |   |   |   |   |   |   |   |   |   |   |   |   |   |   |   |   |   |   |   |   |   |   |   |   |   |   |   |   |   |   |   |   |   |   |   |   |   |   |   |   |   |   |   |   |   |   |   |   |   |   |   |   |   |   |   |   |   |   |   |   |   |   |   |   |   |   |   |   |   |   |   |   |   |   |   |   |   |   |   |   |   |   |   |   |   |   |   |   |   |   |   |   |   |   |   |   |   |   |   |   |   |   |   |   |   |   |   |   |   |   |   |   |   |   |   |   |   |   |   |   |   |   |   |   |   |   |   |   |   |   |   |   |   |   |   |   |   |   |   |   |   |   |   |   |   |   |   |   |   |   |   |   |   |   |   |   |   |   |   |   |   |   |   |   |   |   |   |   |   |   |   |   |   |   |   |   |   |   |   |   |   |   |   |   |   |   |   |   |   |   |   |   |   |   |   |   |   |   |   |   |   |   |   |   |   |   |   |   |   |   |   |   |   |   |   |   |   |   |   |   |   |   |   |   |   |   |   |   |   |   |   |   |   |   |   |   |   |   |
| SARS-CoV-2 Reference Genome NC_045512.2 (21057)         | CC      | CTAA    | GACTA | --AAA | ATGTTA | CAAAA  | GAAAT | TGA    | CTCTAAAGAGGGT | TTTTTTT | CAC | T     | TAC   | ATTT  | G      | TGGG | TTT | AT  | ACA | ACA  |      |     |      |     |    |     |     |    |      |      |     |     |     |    |      |      |     |   |    |   |    |   |     |     |    |     |   |   |   |    |   |     |    |   |   |   |   |   |   |   |   |   |   |   |   |   |   |   |   |   |   |   |   |   |   |   |   |   |   |   |   |   |   |   |   |   |   |   |   |   |   |   |   |   |   |   |   |   |   |   |   |   |   |   |   |   |   |   |   |   |   |   |   |   |   |   |   |   |   |   |   |   |   |   |   |   |   |   |   |   |   |   |   |   |   |   |   |   |   |   |   |   |   |   |   |   |   |   |   |   |   |   |   |   |   |   |   |   |   |   |   |   |   |   |   |   |   |   |   |   |   |   |   |   |   |   |   |   |   |   |   |   |   |   |   |   |   |   |   |   |   |   |   |   |   |   |   |   |   |   |   |   |   |   |   |   |   |   |   |   |   |   |   |   |   |   |   |   |   |   |   |   |   |   |   |   |   |   |   |   |   |   |   |   |   |   |   |   |   |   |   |   |   |   |   |   |   |   |   |   |   |   |   |   |   |   |   |   |   |   |   |   |   |   |   |   |   |   |   |   |   |   |   |   |   |   |   |   |   |   |   |   |   |   |   |   |   |   |   |   |   |   |   |   |   |   |   |   |   |   |   |   |   |   |   |   |   |   |   |   |   |   |   |   |   |   |   |   |   |   |   |   |   |   |   |   |   |   |   |   |   |   |   |   |   |   |   |   |   |   |   |   |   |   |   |   |   |   |   |   |   |   |   |   |   |   |   |   |   |   |   |   |   |   |   |   |   |   |   |   |   |   |   |   |   |   |   |   |   |   |   |   |   |   |   |   |   |   |   |   |   |   |   |   |   |   |   |   |   |   |   |   |   |   |   |   |   |   |   |   |   |   |   |   |   |   |   |   |   |   |   |   |   |   |   |   |   |   |   |   |   |   |   |   |   |   |   |   |   |   |   |   |   |   |   |   |   |   |   |   |   |   |   |   |   |   |   |   |   |   |   |   |   |   |   |   |   |   |   |   |   |   |   |   |   |   |   |   |   |   |   |   |   |   |   |   |   |   |   |   |   |   |   |   |   |   |   |   |   |   |   |   |   |   |   |   |   |   |   |   |   |   |   |   |   |   |   |   |   |   |   |   |   |   |   |   |   |   |   |   |   |   |   |   |   |   |   |   |   |   |   |   |   |   |   |   |   |   |   |   |   |   |   |   |   |   |   |   |   |   |   |   |   |   |   |   |   |   |   |   |   |   |   |   |   |   |   |   |   |   |   |   |   |   |   |   |   |   |   |   |   |   |   |   |   |   |   |   |   |   |   |   |   |   |   |   |   |   |   |   |   |   |   |   |   |   |   |   |   |   |   |   |   |   |   |   |   |   |   |   |   |   |   |   |   |   |   |   |   |   |   |   |   |   |   |   |   |   |   |   |   |   |   |   |   |   |   |   |   |   |   |   |   |   |   |   |   |   |   |   |   |   |   |   |   |   |   |   |   |   |   |   |   |   |   |   |   |   |   |   |   |   |   |   |   |   |   |   |   |   |   |   |   |   |   |   |   |   |   |   |   |   |   |   |   |   |   |   |   |   |   |   |   |   |   |   |   |   |   |   |   |   |   |   |   |   |   |   |   |   |   |   |   |   |   |   |   |   |   |   |   |   |   |   |   |   |   |   |   |   |   |   |   |   |   |   |   |   |   |   |   |
| Sulfolobus turreted icosahedral virus NC_005892 (16616) | GT      | CTCA    | -ACTA | TTT   | AA     | TGCCGA | A--TC | GCAAT  | TAG           | CTG     | CG  | AA    | CA    | ---   | T      | CAT  | TAC | CCG | T   | GAC  | GG-- | G   | GACT | TTT | GG | ACA | CTT |    |      |      |     |     |     |    |      |      |     |   |    |   |    |   |     |     |    |     |   |   |   |    |   |     |    |   |   |   |   |   |   |   |   |   |   |   |   |   |   |   |   |   |   |   |   |   |   |   |   |   |   |   |   |   |   |   |   |   |   |   |   |   |   |   |   |   |   |   |   |   |   |   |   |   |   |   |   |   |   |   |   |   |   |   |   |   |   |   |   |   |   |   |   |   |   |   |   |   |   |   |   |   |   |   |   |   |   |   |   |   |   |   |   |   |   |   |   |   |   |   |   |   |   |   |   |   |   |   |   |   |   |   |   |   |   |   |   |   |   |   |   |   |   |   |   |   |   |   |   |   |   |   |   |   |   |   |   |   |   |   |   |   |   |   |   |   |   |   |   |   |   |   |   |   |   |   |   |   |   |   |   |   |   |   |   |   |   |   |   |   |   |   |   |   |   |   |   |   |   |   |   |   |   |   |   |   |   |   |   |   |   |   |   |   |   |   |   |   |   |   |   |   |   |   |   |   |   |   |   |   |   |   |   |   |   |   |   |   |   |   |   |   |   |   |   |   |   |   |   |   |   |   |   |   |   |   |   |   |   |   |   |   |   |   |   |   |   |   |   |   |   |   |   |   |   |   |   |   |   |   |   |   |   |   |   |   |   |   |   |   |   |   |   |   |   |   |   |   |   |   |   |   |   |   |   |   |   |   |   |   |   |   |   |   |   |   |   |   |   |   |   |   |   |   |   |   |   |   |   |   |   |   |   |   |   |   |   |   |   |   |   |   |   |   |   |   |   |   |   |   |   |   |   |   |   |   |   |   |   |   |   |   |   |   |   |   |   |   |   |   |   |   |   |   |   |   |   |   |   |   |   |   |   |   |   |   |   |   |   |   |   |   |   |   |   |   |   |   |   |   |   |   |   |   |   |   |   |   |   |   |   |   |   |   |   |   |   |   |   |   |   |   |   |   |   |   |   |   |   |   |   |   |   |   |   |   |   |   |   |   |   |   |   |   |   |   |   |   |   |   |   |   |   |   |   |   |   |   |   |   |   |   |   |   |   |   |   |   |   |   |   |   |   |   |   |   |   |   |   |   |   |   |   |   |   |   |   |   |   |   |   |   |   |   |   |   |   |   |   |   |   |   |   |   |   |   |   |   |   |   |   |   |   |   |   |   |   |   |   |   |   |   |   |   |   |   |   |   |   |   |   |   |   |   |   |   |   |   |   |   |   |   |   |   |   |   |   |   |   |   |   |   |   |   |   |   |   |   |   |   |   |   |   |   |   |   |   |   |   |   |   |   |   |   |   |   |   |   |   |   |   |   |   |   |   |   |   |   |   |   |   |   |   |   |   |   |   |   |   |   |   |   |   |   |   |   |   |   |   |   |   |   |   |   |   |   |   |   |   |   |   |   |   |   |   |   |   |   |   |   |   |   |   |   |   |   |   |   |   |   |   |   |   |   |   |   |   |   |   |   |   |   |   |   |   |   |   |   |   |   |   |   |   |   |   |   |   |   |   |   |   |   |   |   |   |   |   |   |   |   |   |   |   |   |   |   |   |   |   |   |   |   |   |   |   |   |   |   |   |   |   |   |   |   |   |   |   |   |   |   |   |   |   |   |   |   |   |   |   |   |   |   |   |   |   |   |   |   |   |   |   |   |   |   |   |   |   |   |   |   |   |   |   |
| Section 268                                             |         |         |       |       |        |        |       |        |               |         |     |       |       |       |        |      |     |     |     |      |      |     |      |     |    |     |     |    |      |      |     |     |     |    |      |      |     |   |    |   |    |   |     |     |    |     |   |   |   |    |   |     |    |   |   |   |   |   |   |   |   |   |   |   |   |   |   |   |   |   |   |   |   |   |   |   |   |   |   |   |   |   |   |   |   |   |   |   |   |   |   |   |   |   |   |   |   |   |   |   |   |   |   |   |   |   |   |   |   |   |   |   |   |   |   |   |   |   |   |   |   |   |   |   |   |   |   |   |   |   |   |   |   |   |   |   |   |   |   |   |   |   |   |   |   |   |   |   |   |   |   |   |   |   |   |   |   |   |   |   |   |   |   |   |   |   |   |   |   |   |   |   |   |   |   |   |   |   |   |   |   |   |   |   |   |   |   |   |   |   |   |   |   |   |   |   |   |   |   |   |   |   |   |   |   |   |   |   |   |   |   |   |   |   |   |   |   |   |   |   |   |   |   |   |   |   |   |   |   |   |   |   |   |   |   |   |   |   |   |   |   |   |   |   |   |   |   |   |   |   |   |   |   |   |   |   |   |   |   |   |   |   |   |   |   |   |   |   |   |   |   |   |   |   |   |   |   |   |   |   |   |   |   |   |   |   |   |   |   |   |   |   |   |   |   |   |   |   |   |   |   |   |   |   |   |   |   |   |   |   |   |   |   |   |   |   |   |   |   |   |   |   |   |   |   |   |   |   |   |   |   |   |   |   |   |   |   |   |   |   |   |   |   |   |   |   |   |   |   |   |   |   |   |   |   |   |   |   |   |   |   |   |   |   |   |   |   |   |   |   |   |   |   |   |   |   |   |   |   |   |   |   |   |   |   |   |   |   |   |   |   |   |   |   |   |   |   |   |   |   |   |   |   |   |   |   |   |   |   |   |   |   |   |   |   |   |   |   |   |   |   |   |   |   |   |   |   |   |   |   |   |   |   |   |   |   |   |   |   |   |   |   |   |   |   |   |   |   |   |   |   |   |   |   |   |   |   |   |   |   |   |   |   |   |   |   |   |   |   |   |   |   |   |   |   |   |   |   |   |   |   |   |   |   |   |   |   |   |   |   |   |   |   |   |   |   |   |   |   |   |   |   |   |   |   |   |   |   |   |   |   |   |   |   |   |   |   |   |   |   |   |   |   |   |   |   |   |   |   |   |   |   |   |   |   |   |   |   |   |   |   |   |   |   |   |   |   |   |   |   |   |   |   |   |   |   |   |   |   |   |   |   |   |   |   |   |   |   |   |   |   |   |   |   |   |   |   |   |   |   |   |   |   |   |   |   |   |   |   |   |   |   |   |   |   |   |   |   |   |   |   |   |   |   |   |   |   |   |   |   |   |   |   |   |   |   |   |   |   |   |   |   |   |   |   |   |   |   |   |   |   |   |   |   |   |   |   |   |   |   |   |   |   |   |   |   |   |   |   |   |   |   |   |   |   |   |   |   |   |   |   |   |   |   |   |   |   |   |   |   |   |   |   |   |   |   |   |   |   |   |   |   |   |   |   |   |   |   |   |   |   |   |   |   |   |   |   |   |   |   |   |   |   |   |   |   |   |   |   |   |   |   |   |   |   |   |   |   |   |   |   |   |   |   |   |   |   |   |   |   |   |   |   |   |   |   |   |   |   |   |   |   |   |   |   |   |   |   |   |   |   |   |   |   |   |   |   |   |   |   |   |   |   |   |   |   |   |   |   |   |   |
|                                                         | (21361) | 21361   | 21370 | 21380 | 21390  | 21400  | 21410 | 21420  | 21430 21440   |         |     |       |       |       |        |      |     |     |     |      |      |     |      |     |    |     |     |    |      |      |     |     |     |    |      |      |     |   |    |   |    |   |     |     |    |     |   |   |   |    |   |     |    |   |   |   |   |   |   |   |   |   |   |   |   |   |   |   |   |   |   |   |   |   |   |   |   |   |   |   |   |   |   |   |   |   |   |   |   |   |   |   |   |   |   |   |   |   |   |   |   |   |   |   |   |   |   |   |   |   |   |   |   |   |   |   |   |   |   |   |   |   |   |   |   |   |   |   |   |   |   |   |   |   |   |   |   |   |   |   |   |   |   |   |   |   |   |   |   |   |   |   |   |   |   |   |   |   |   |   |   |   |   |   |   |   |   |   |   |   |   |   |   |   |   |   |   |   |   |   |   |   |   |   |   |   |   |   |   |   |   |   |   |   |   |   |   |   |   |   |   |   |   |   |   |   |   |   |   |   |   |   |   |   |   |   |   |   |   |   |   |   |   |   |   |   |   |   |   |   |   |   |   |   |   |   |   |   |   |   |   |   |   |   |   |   |   |   |   |   |   |   |   |   |   |   |   |   |   |   |   |   |   |   |   |   |   |   |   |   |   |   |   |   |   |   |   |   |   |   |   |   |   |   |   |   |   |   |   |   |   |   |   |   |   |   |   |   |   |   |   |   |   |   |   |   |   |   |   |   |   |   |   |   |   |   |   |   |   |   |   |   |   |   |   |   |   |   |   |   |   |   |   |   |   |   |   |   |   |   |   |   |   |   |   |   |   |   |   |   |   |   |   |   |   |   |   |   |   |   |   |   |   |   |   |   |   |   |   |   |   |   |   |   |   |   |   |   |   |   |   |   |   |   |   |   |   |   |   |   |   |   |   |   |   |   |   |   |   |   |   |   |   |   |   |   |   |   |   |   |   |   |   |   |   |   |   |   |   |   |   |   |   |   |   |   |   |   |   |   |   |   |   |   |   |   |   |   |   |   |   |   |   |   |   |   |   |   |   |   |   |   |   |   |   |   |   |   |   |   |   |   |   |   |   |   |   |   |   |   |   |   |   |   |   |   |   |   |   |   |   |   |   |   |   |   |   |   |   |   |   |   |   |   |   |   |   |   |   |   |   |   |   |   |   |   |   |   |   |   |   |   |   |   |   |   |   |   |   |   |   |   |   |   |   |   |   |   |   |   |   |   |   |   |   |   |   |   |   |   |   |   |   |   |   |   |   |   |   |   |   |   |   |   |   |   |   |   |   |   |   |   |   |   |   |   |   |   |   |   |   |   |   |   |   |   |   |   |   |   |   |   |   |   |   |   |   |   |   |   |   |   |   |   |   |   |   |   |   |   |   |   |   |   |   |   |   |   |   |   |   |   |   |   |   |   |   |   |   |   |   |   |   |   |   |   |   |   |   |   |   |   |   |   |   |   |   |   |   |   |   |   |   |   |   |   |   |   |   |   |   |   |   |   |   |   |   |   |   |   |   |   |   |   |   |   |   |   |   |   |   |   |   |   |   |   |   |   |   |   |   |   |   |   |   |   |   |   |   |   |   |   |   |   |   |   |   |   |   |   |   |   |   |   |   |   |   |   |   |   |   |   |   |   |   |   |   |   |   |   |   |   |   |   |   |   |   |   |   |   |   |   |   |   |   |   |   |   |   |   |   |   |   |   |   |   |   |   |   |   |   |   |   |   |   |   |   |   |   |   |   |   |   |   |   |   |   |   |   |   |   |
| SARS-CoV-2 Reference Genome NC_045512.2 (21135)         | AA      | AGCTAGC | TC    | TT    | GGAG   | GT     | TC    | CG     | TGG           | CT      | ATA | AAGAT | AACAG | AACAT | T      | CT   | T   | GGA | AT  | TGC- | T    | GAT | CT   | T   | T  | ATA | G   | CT | CAT  | GGG  | A   |     |     |    |      |      |     |   |    |   |    |   |     |     |    |     |   |   |   |    |   |     |    |   |   |   |   |   |   |   |   |   |   |   |   |   |   |   |   |   |   |   |   |   |   |   |   |   |   |   |   |   |   |   |   |   |   |   |   |   |   |   |   |   |   |   |   |   |   |   |   |   |   |   |   |   |   |   |   |   |   |   |   |   |   |   |   |   |   |   |   |   |   |   |   |   |   |   |   |   |   |   |   |   |   |   |   |   |   |   |   |   |   |   |   |   |   |   |   |   |   |   |   |   |   |   |   |   |   |   |   |   |   |   |   |   |   |   |   |   |   |   |   |   |   |   |   |   |   |   |   |   |   |   |   |   |   |   |   |   |   |   |   |   |   |   |   |   |   |   |   |   |   |   |   |   |   |   |   |   |   |   |   |   |   |   |   |   |   |   |   |   |   |   |   |   |   |   |   |   |   |   |   |   |   |   |   |   |   |   |   |   |   |   |   |   |   |   |   |   |   |   |   |   |   |   |   |   |   |   |   |   |   |   |   |   |   |   |   |   |   |   |   |   |   |   |   |   |   |   |   |   |   |   |   |   |   |   |   |   |   |   |   |   |   |   |   |   |   |   |   |   |   |   |   |   |   |   |   |   |   |   |   |   |   |   |   |   |   |   |   |   |   |   |   |   |   |   |   |   |   |   |   |   |   |   |   |   |   |   |   |   |   |   |   |   |   |   |   |   |   |   |   |   |   |   |   |   |   |   |   |   |   |   |   |   |   |   |   |   |   |   |   |   |   |   |   |   |   |   |   |   |   |   |   |   |   |   |   |   |   |   |   |   |   |   |   |   |   |   |   |   |   |   |   |   |   |   |   |   |   |   |   |   |   |   |   |   |   |   |   |   |   |   |   |   |   |   |   |   |   |   |   |   |   |   |   |   |   |   |   |   |   |   |   |   |   |   |   |   |   |   |   |   |   |   |   |   |   |   |   |   |   |   |   |   |   |   |   |   |   |   |   |   |   |   |   |   |   |   |   |   |   |   |   |   |   |   |   |   |   |   |   |   |   |   |   |   |   |   |   |   |   |   |   |   |   |   |   |   |   |   |   |   |   |   |   |   |   |   |   |   |   |   |   |   |   |   |   |   |   |   |   |   |   |   |   |   |   |   |   |   |   |   |   |   |   |   |   |   |   |   |   |   |   |   |   |   |   |   |   |   |   |   |   |   |   |   |   |   |   |   |   |   |   |   |   |   |   |   |   |   |   |   |   |   |   |   |   |   |   |   |   |   |   |   |   |   |   |   |   |   |   |   |   |   |   |   |   |   |   |   |   |   |   |   |   |   |   |   |   |   |   |   |   |   |   |   |   |   |   |   |   |   |   |   |   |   |   |   |   |   |   |   |   |   |   |   |   |   |   |   |   |   |   |   |   |   |   |   |   |   |   |   |   |   |   |   |   |   |   |   |   |   |   |   |   |   |   |   |   |   |   |   |   |   |   |   |   |   |   |   |   |   |   |   |   |   |   |   |   |   |   |   |   |   |   |   |   |   |   |   |   |   |   |   |   |   |   |   |   |   |   |   |   |   |   |   |   |   |   |   |   |   |   |   |   |   |   |   |   |   |   |   |   |   |   |   |   |   |   |   |   |   |   |   |   |   |   |   |   |   |   |   |   |   |   |   |   |   |   |
| Sulfolobus turreted icosahedral virus NC_005892 (16688) | GG      | CAGCGCA | TC    | CG    | GGAG   | AA     | TC    | AT     | TGG           | GGA     | GT  | AAGAT | T---- | AG    | TGA    | T    | A   | G   | CA  | T    | TGG  | T   | A    | TAG | C  | T   | G   | A  | CT   | G    | CT  | TCC | GGG | G  |      |      |     |   |    |   |    |   |     |     |    |     |   |   |   |    |   |     |    |   |   |   |   |   |   |   |   |   |   |   |   |   |   |   |   |   |   |   |   |   |   |   |   |   |   |   |   |   |   |   |   |   |   |   |   |   |   |   |   |   |   |   |   |   |   |   |   |   |   |   |   |   |   |   |   |   |   |   |   |   |   |   |   |   |   |   |   |   |   |   |   |   |   |   |   |   |   |   |   |   |   |   |   |   |   |   |   |   |   |   |   |   |   |   |   |   |   |   |   |   |   |   |   |   |   |   |   |   |   |   |   |   |   |   |   |   |   |   |   |   |   |   |   |   |   |   |   |   |   |   |   |   |   |   |   |   |   |   |   |   |   |   |   |   |   |   |   |   |   |   |   |   |   |   |   |   |   |   |   |   |   |   |   |   |   |   |   |   |   |   |   |   |   |   |   |   |   |   |   |   |   |   |   |   |   |   |   |   |   |   |   |   |   |   |   |   |   |   |   |   |   |   |   |   |   |   |   |   |   |   |   |   |   |   |   |   |   |   |   |   |   |   |   |   |   |   |   |   |   |   |   |   |   |   |   |   |   |   |   |   |   |   |   |   |   |   |   |   |   |   |   |   |   |   |   |   |   |   |   |   |   |   |   |   |   |   |   |   |   |   |   |   |   |   |   |   |   |   |   |   |   |   |   |   |   |   |   |   |   |   |   |   |   |   |   |   |   |   |   |   |   |   |   |   |   |   |   |   |   |   |   |   |   |   |   |   |   |   |   |   |   |   |   |   |   |   |   |   |   |   |   |   |   |   |   |   |   |   |   |   |   |   |   |   |   |   |   |   |   |   |   |   |   |   |   |   |   |   |   |   |   |   |   |   |   |   |   |   |   |   |   |   |   |   |   |   |   |   |   |   |   |   |   |   |   |   |   |   |   |   |   |   |   |   |   |   |   |   |   |   |   |   |   |   |   |   |   |   |   |   |   |   |   |   |   |   |   |   |   |   |   |   |   |   |   |   |   |   |   |   |   |   |   |   |   |   |   |   |   |   |   |   |   |   |   |   |   |   |   |   |   |   |   |   |   |   |   |   |   |   |   |   |   |   |   |   |   |   |   |   |   |   |   |   |   |   |   |   |   |   |   |   |   |   |   |   |   |   |   |   |   |   |   |   |   |   |   |   |   |   |   |   |   |   |   |   |   |   |   |   |   |   |   |   |   |   |   |   |   |   |   |   |   |   |   |   |   |   |   |   |   |   |   |   |   |   |   |   |   |   |   |   |   |   |   |   |   |   |   |   |   |   |   |   |   |   |   |   |   |   |   |   |   |   |   |   |   |   |   |   |   |   |   |   |   |   |   |   |   |   |   |   |   |   |   |   |   |   |   |   |   |   |   |   |   |   |   |   |   |   |   |   |   |   |   |   |   |   |   |   |   |   |   |   |   |   |   |   |   |   |   |   |   |   |   |   |   |   |   |   |   |   |   |   |   |   |   |   |   |   |   |   |   |   |   |   |   |   |   |   |   |   |   |   |   |   |   |   |   |   |   |   |   |   |   |   |   |   |   |   |   |   |   |   |   |   |   |   |   |   |   |   |   |   |   |   |   |   |   |   |   |   |   |   |   |   |   |   |   |   |   |   |   |   |   |   |   |   |   |   |   |   |   |   |   |   |   |
| Section 269                                             |         |         |       |       |        |        |       |        |               |         |     |       |       |       |        |      |     |     |     |      |      |     |      |     |    |     |     |    |      |      |     |     |     |    |      |      |     |   |    |   |    |   |     |     |    |     |   |   |   |    |   |     |    |   |   |   |   |   |   |   |   |   |   |   |   |   |   |   |   |   |   |   |   |   |   |   |   |   |   |   |   |   |   |   |   |   |   |   |   |   |   |   |   |   |   |   |   |   |   |   |   |   |   |   |   |   |   |   |   |   |   |   |   |   |   |   |   |   |   |   |   |   |   |   |   |   |   |   |   |   |   |   |   |   |   |   |   |   |   |   |   |   |   |   |   |   |   |   |   |   |   |   |   |   |   |   |   |   |   |   |   |   |   |   |   |   |   |   |   |   |   |   |   |   |   |   |   |   |   |   |   |   |   |   |   |   |   |   |   |   |   |   |   |   |   |   |   |   |   |   |   |   |   |   |   |   |   |   |   |   |   |   |   |   |   |   |   |   |   |   |   |   |   |   |   |   |   |   |   |   |   |   |   |   |   |   |   |   |   |   |   |   |   |   |   |   |   |   |   |   |   |   |   |   |   |   |   |   |   |   |   |   |   |   |   |   |   |   |   |   |   |   |   |   |   |   |   |   |   |   |   |   |   |   |   |   |   |   |   |   |   |   |   |   |   |   |   |   |   |   |   |   |   |   |   |   |   |   |   |   |   |   |   |   |   |   |   |   |   |   |   |   |   |   |   |   |   |   |   |   |   |   |   |   |   |   |   |   |   |   |   |   |   |   |   |   |   |   |   |   |   |   |   |   |   |   |   |   |   |   |   |   |   |   |   |   |   |   |   |   |   |   |   |   |   |   |   |   |   |   |   |   |   |   |   |   |   |   |   |   |   |   |   |   |   |   |   |   |   |   |   |   |   |   |   |   |   |   |   |   |   |   |   |   |   |   |   |   |   |   |   |   |   |   |   |   |   |   |   |   |   |   |   |   |   |   |   |   |   |   |   |   |   |   |   |   |   |   |   |   |   |   |   |   |   |   |   |   |   |   |   |   |   |   |   |   |   |   |   |   |   |   |   |   |   |   |   |   |   |   |   |   |   |   |   |   |   |   |   |   |   |   |   |   |   |   |   |   |   |   |   |   |   |   |   |   |   |   |   |   |   |   |   |   |   |   |   |   |   |   |   |   |   |   |   |   |   |   |   |   |   |   |   |   |   |   |   |   |   |   |   |   |   |   |   |   |   |   |   |   |   |   |   |   |   |   |   |   |   |   |   |   |   |   |   |   |   |   |   |   |   |   |   |   |   |   |   |   |   |   |   |   |   |   |   |   |   |   |   |   |   |   |   |   |   |   |   |   |   |   |   |   |   |   |   |   |   |   |   |   |   |   |   |   |   |   |   |   |   |   |   |   |   |   |   |   |   |   |   |   |   |   |   |   |   |   |   |   |   |   |   |   |   |   |   |   |   |   |   |   |   |   |   |   |   |   |   |   |   |   |   |   |   |   |   |   |   |   |   |   |   |   |   |   |   |   |   |   |   |   |   |   |   |   |   |   |   |   |   |   |   |   |   |   |   |   |   |   |   |   |   |   |   |   |   |   |   |   |   |   |   |   |   |   |   |   |   |   |   |   |   |   |   |   |   |   |   |   |   |   |   |   |   |   |   |   |   |   |   |   |   |   |   |   |   |   |   |   |   |   |   |   |   |   |   |   |   |   |   |   |   |   |   |   |   |   |   |   |   |   |   |
|                                                         | (21441) | 21441   | 21450 | 21460 | 21470  | 21480  | 21490 | 21500  | 21510 21520   |         |     |       |       |       |        |      |     |     |     |      |      |     |      |     |    |     |     |    |      |      |     |     |     |    |      |      |     |   |    |   |    |   |     |     |    |     |   |   |   |    |   |     |    |   |   |   |   |   |   |   |   |   |   |   |   |   |   |   |   |   |   |   |   |   |   |   |   |   |   |   |   |   |   |   |   |   |   |   |   |   |   |   |   |   |   |   |   |   |   |   |   |   |   |   |   |   |   |   |   |   |   |   |   |   |   |   |   |   |   |   |   |   |   |   |   |   |   |   |   |   |   |   |   |   |   |   |   |   |   |   |   |   |   |   |   |   |   |   |   |   |   |   |   |   |   |   |   |   |   |   |   |   |   |   |   |   |   |   |   |   |   |   |   |   |   |   |   |   |   |   |   |   |   |   |   |   |   |   |   |   |   |   |   |   |   |   |   |   |   |   |   |   |   |   |   |   |   |   |   |   |   |   |   |   |   |   |   |   |   |   |   |   |   |   |   |   |   |   |   |   |   |   |   |   |   |   |   |   |   |   |   |   |   |   |   |   |   |   |   |   |   |   |   |   |   |   |   |   |   |   |   |   |   |   |   |   |   |   |   |   |   |   |   |   |   |   |   |   |   |   |   |   |   |   |   |   |   |   |   |   |   |   |   |   |   |   |   |   |   |   |   |   |   |   |   |   |   |   |   |   |   |   |   |   |   |   |   |   |   |   |   |   |   |   |   |   |   |   |   |   |   |   |   |   |   |   |   |   |   |   |   |   |   |   |   |   |   |   |   |   |   |   |   |   |   |   |   |   |   |   |   |   |   |   |   |   |   |   |   |   |   |   |   |   |   |   |   |   |   |   |   |   |   |   |   |   |   |   |   |   |   |   |   |   |   |   |   |   |   |   |   |   |   |   |   |   |   |   |   |   |   |   |   |   |   |   |   |   |   |   |   |   |   |   |   |   |   |   |   |   |   |   |   |   |   |   |   |   |   |   |   |   |   |   |   |   |   |   |   |   |   |   |   |   |   |   |   |   |   |   |   |   |   |   |   |   |   |   |   |   |   |   |   |   |   |   |   |   |   |   |   |   |   |   |   |   |   |   |   |   |   |   |   |   |   |   |   |   |   |   |   |   |   |   |   |   |   |   |   |   |   |   |   |   |   |   |   |   |   |   |   |   |   |   |   |   |   |   |   |   |   |   |   |   |   |   |   |   |   |   |   |   |   |   |   |   |   |   |   |   |   |   |   |   |   |   |   |   |   |   |   |   |   |   |   |   |   |   |   |   |   |   |   |   |   |   |   |   |   |   |   |   |   |   |   |   |   |   |   |   |   |   |   |   |   |   |   |   |   |   |   |   |   |   |   |   |   |   |   |   |   |   |   |   |   |   |   |   |   |   |   |   |   |   |   |   |   |   |   |   |   |   |   |   |   |   |   |   |   |   |   |   |   |   |   |   |   |   |   |   |   |   |   |   |   |   |   |   |   |   |   |   |   |   |   |   |   |   |   |   |   |   |   |   |   |   |   |   |   |   |   |   |   |   |   |   |   |   |   |   |   |   |   |   |   |   |   |   |   |   |   |   |   |   |   |   |   |   |   |   |   |   |   |   |   |   |   |   |   |   |   |   |   |   |   |   |   |   |   |   |   |   |   |   |   |   |   |   |   |   |   |   |   |   |   |   |   |   |   |   |   |   |   |   |   |   |   |   |   |   |   |   |   |   |   |   |   |   |   |   |   |
| SARS-CoV-2 Reference Genome NC_045512.2 (21214)         | CAC     | T       | TCGC  | AT    | G      | T      | G     | GACAGC | CT            | T       | T   | G     | T     | TAC   | TAATGT | G    | A   | T   | G   | CGT  | C    | A   | T    | C   | A  | T   | CT  | G  | AAGC | ATTT | TTA | ATT | GGA | TG | TA   | ATT  | A   | T | C  | T |    |   |     |     |    |     |   |   |   |    |   |     |    |   |   |   |   |   |   |   |   |   |   |   |   |   |   |   |   |   |   |   |   |   |   |   |   |   |   |   |   |   |   |   |   |   |   |   |   |   |   |   |   |   |   |   |   |   |   |   |   |   |   |   |   |   |   |   |   |   |   |   |   |   |   |   |   |   |   |   |   |   |   |   |   |   |   |   |   |   |   |   |   |   |   |   |   |   |   |   |   |   |   |   |   |   |   |   |   |   |   |   |   |   |   |   |   |   |   |   |   |   |   |   |   |   |   |   |   |   |   |   |   |   |   |   |   |   |   |   |   |   |   |   |   |   |   |   |   |   |   |   |   |   |   |   |   |   |   |   |   |   |   |   |   |   |   |   |   |   |   |   |   |   |   |   |   |   |   |   |   |   |   |   |   |   |   |   |   |   |   |   |   |   |   |   |   |   |   |   |   |   |   |   |   |   |   |   |   |   |   |   |   |   |   |   |   |   |   |   |   |   |   |   |   |   |   |   |   |   |   |   |   |   |   |   |   |   |   |   |   |   |   |   |   |   |   |   |   |   |   |   |   |   |   |   |   |   |   |   |   |   |   |   |   |   |   |   |   |   |   |   |   |   |   |   |   |   |   |   |   |   |   |   |   |   |   |   |   |   |   |   |   |   |   |   |   |   |   |   |   |   |   |   |   |   |   |   |   |   |   |   |   |   |   |   |   |   |   |   |   |   |   |   |   |   |   |   |   |   |   |   |   |   |   |   |   |   |   |   |   |   |   |   |   |   |   |   |   |   |   |   |   |   |   |   |   |   |   |   |   |   |   |   |   |   |   |   |   |   |   |   |   |   |   |   |   |   |   |   |   |   |   |   |   |   |   |   |   |   |   |   |   |   |   |   |   |   |   |   |   |   |   |   |   |   |   |   |   |   |   |   |   |   |   |   |   |   |   |   |   |   |   |   |   |   |   |   |   |   |   |   |   |   |   |   |   |   |   |   |   |   |   |   |   |   |   |   |   |   |   |   |   |   |   |   |   |   |   |   |   |   |   |   |   |   |   |   |   |   |   |   |   |   |   |   |   |   |   |   |   |   |   |   |   |   |   |   |   |   |   |   |   |   |   |   |   |   |   |   |   |   |   |   |   |   |   |   |   |   |   |   |   |   |   |   |   |   |   |   |   |   |   |   |   |   |   |   |   |   |   |   |   |   |   |   |   |   |   |   |   |   |   |   |   |   |   |   |   |   |   |   |   |   |   |   |   |   |   |   |   |   |   |   |   |   |   |   |   |   |   |   |   |   |   |   |   |   |   |   |   |   |   |   |   |   |   |   |   |   |   |   |   |   |   |   |   |   |   |   |   |   |   |   |   |   |   |   |   |   |   |   |   |   |   |   |   |   |   |   |   |   |   |   |   |   |   |   |   |   |   |   |   |   |   |   |   |   |   |   |   |   |   |   |   |   |   |   |   |   |   |   |   |   |   |   |   |   |   |   |   |   |   |   |   |   |   |   |   |   |   |   |   |   |   |   |   |   |   |   |   |   |   |   |   |   |   |   |   |   |   |   |   |   |   |   |   |   |   |   |   |   |   |   |   |   |   |   |   |   |   |   |   |   |   |   |   |   |   |   |   |   |   |   |   |   |   |   |   |   |   |
| Sulfolobus turreted icosahedral virus NC_005892 (16764) | T--     | T       | AGAT  | AT    | A      | G      | C     | G      | T             | C       | T   | T     | --    | CT    | C      | T    | C   | T   | TAC | G    | C    | C   | C    | --  | G  | C   | A   | G  | CGT  | -    | AGG | AG  | CT  | G  | AAGC | CGCG | TTA | G | C  | C | GG | A | G   | C   | TA | G   | A | G | C | TT | T |     |    |   |   |   |   |   |   |   |   |   |   |   |   |   |   |   |   |   |   |   |   |   |   |   |   |   |   |   |   |   |   |   |   |   |   |   |   |   |   |   |   |   |   |   |   |   |   |   |   |   |   |   |   |   |   |   |   |   |   |   |   |   |   |   |   |   |   |   |   |   |   |   |   |   |   |   |   |   |   |   |   |   |   |   |   |   |   |   |   |   |   |   |   |   |   |   |   |   |   |   |   |   |   |   |   |   |   |   |   |   |   |   |   |   |   |   |   |   |   |   |   |   |   |   |   |   |   |   |   |   |   |   |   |   |   |   |   |   |   |   |   |   |   |   |   |   |   |   |   |   |   |   |   |   |   |   |   |   |   |   |   |   |   |   |   |   |   |   |   |   |   |   |   |   |   |   |   |   |   |   |   |   |   |   |   |   |   |   |   |   |   |   |   |   |   |   |   |   |   |   |   |   |   |   |   |   |   |   |   |   |   |   |   |   |   |   |   |   |   |   |   |   |   |   |   |   |   |   |   |   |   |   |   |   |   |   |   |   |   |   |   |   |   |   |   |   |   |   |   |   |   |   |   |   |   |   |   |   |   |   |   |   |   |   |   |   |   |   |   |   |   |   |   |   |   |   |   |   |   |   |   |   |   |   |   |   |   |   |   |   |   |   |   |   |   |   |   |   |   |   |   |   |   |   |   |   |   |   |   |   |   |   |   |   |   |   |   |   |   |   |   |   |   |   |   |   |   |   |   |   |   |   |   |   |   |   |   |   |   |   |   |   |   |   |   |   |   |   |   |   |   |   |   |   |   |   |   |   |   |   |   |   |   |   |   |   |   |   |   |   |   |   |   |   |   |   |   |   |   |   |   |   |   |   |   |   |   |   |   |   |   |   |   |   |   |   |   |   |   |   |   |   |   |   |   |   |   |   |   |   |   |   |   |   |   |   |   |   |   |   |   |   |   |   |   |   |   |   |   |   |   |   |   |   |   |   |   |   |   |   |   |   |   |   |   |   |   |   |   |   |   |   |   |   |   |   |   |   |   |   |   |   |   |   |   |   |   |   |   |   |   |   |   |   |   |   |   |   |   |   |   |   |   |   |   |   |   |   |   |   |   |   |   |   |   |   |   |   |   |   |   |   |   |   |   |   |   |   |   |   |   |   |   |   |   |   |   |   |   |   |   |   |   |   |   |   |   |   |   |   |   |   |   |   |   |   |   |   |   |   |   |   |   |   |   |   |   |   |   |   |   |   |   |   |   |   |   |   |   |   |   |   |   |   |   |   |   |   |   |   |   |   |   |   |   |   |   |   |   |   |   |   |   |   |   |   |   |   |   |   |   |   |   |   |   |   |   |   |   |   |   |   |   |   |   |   |   |   |   |   |   |   |   |   |   |   |   |   |   |   |   |   |   |   |   |   |   |   |   |   |   |   |   |   |   |   |   |   |   |   |   |   |   |   |   |   |   |   |   |   |   |   |   |   |   |   |   |   |   |   |   |   |   |   |   |   |   |   |   |   |   |   |   |   |   |   |   |   |   |   |   |   |   |   |   |   |   |   |   |   |   |   |   |   |   |   |   |   |   |   |   |   |   |   |   |   |   |   |   |   |   |   |   |   |   |   |   |   |   |
| Section 270                                             |         |         |       |       |        |        |       |        |               |         |     |       |       |       |        |      |     |     |     |      |      |     |      |     |    |     |     |    |      |      |     |     |     |    |      |      |     |   |    |   |    |   |     |     |    |     |   |   |   |    |   |     |    |   |   |   |   |   |   |   |   |   |   |   |   |   |   |   |   |   |   |   |   |   |   |   |   |   |   |   |   |   |   |   |   |   |   |   |   |   |   |   |   |   |   |   |   |   |   |   |   |   |   |   |   |   |   |   |   |   |   |   |   |   |   |   |   |   |   |   |   |   |   |   |   |   |   |   |   |   |   |   |   |   |   |   |   |   |   |   |   |   |   |   |   |   |   |   |   |   |   |   |   |   |   |   |   |   |   |   |   |   |   |   |   |   |   |   |   |   |   |   |   |   |   |   |   |   |   |   |   |   |   |   |   |   |   |   |   |   |   |   |   |   |   |   |   |   |   |   |   |   |   |   |   |   |   |   |   |   |   |   |   |   |   |   |   |   |   |   |   |   |   |   |   |   |   |   |   |   |   |   |   |   |   |   |   |   |   |   |   |   |   |   |   |   |   |   |   |   |   |   |   |   |   |   |   |   |   |   |   |   |   |   |   |   |   |   |   |   |   |   |   |   |   |   |   |   |   |   |   |   |   |   |   |   |   |   |   |   |   |   |   |   |   |   |   |   |   |   |   |   |   |   |   |   |   |   |   |   |   |   |   |   |   |   |   |   |   |   |   |   |   |   |   |   |   |   |   |   |   |   |   |   |   |   |   |   |   |   |   |   |   |   |   |   |   |   |   |   |   |   |   |   |   |   |   |   |   |   |   |   |   |   |   |   |   |   |   |   |   |   |   |   |   |   |   |   |   |   |   |   |   |   |   |   |   |   |   |   |   |   |   |   |   |   |   |   |   |   |   |   |   |   |   |   |   |   |   |   |   |   |   |   |   |   |   |   |   |   |   |   |   |   |   |   |   |   |   |   |   |   |   |   |   |   |   |   |   |   |   |   |   |   |   |   |   |   |   |   |   |   |   |   |   |   |   |   |   |   |   |   |   |   |   |   |   |   |   |   |   |   |   |   |   |   |   |   |   |   |   |   |   |   |   |   |   |   |   |   |   |   |   |   |   |   |   |   |   |   |   |   |   |   |   |   |   |   |   |   |   |   |   |   |   |   |   |   |   |   |   |   |   |   |   |   |   |   |   |   |   |   |   |   |   |   |   |   |   |   |   |   |   |   |   |   |   |   |   |   |   |   |   |   |   |   |   |   |   |   |   |   |   |   |   |   |   |   |   |   |   |   |   |   |   |   |   |   |   |   |   |   |   |   |   |   |   |   |   |   |   |   |   |   |   |   |   |   |   |   |   |   |   |   |   |   |   |   |   |   |   |   |   |   |   |   |   |   |   |   |   |   |   |   |   |   |   |   |   |   |   |   |   |   |   |   |   |   |   |   |   |   |   |   |   |   |   |   |   |   |   |   |   |   |   |   |   |   |   |   |   |   |   |   |   |   |   |   |   |   |   |   |   |   |   |   |   |   |   |   |   |   |   |   |   |   |   |   |   |   |   |   |   |   |   |   |   |   |   |   |   |   |   |   |   |   |   |   |   |   |   |   |   |   |   |   |   |   |   |   |   |   |   |   |   |   |   |   |   |   |   |   |   |   |   |   |   |   |   |   |   |   |   |   |   |   |   |   |   |   |   |   |   |   |   |   |   |   |   |   |   |   |   |   |   |   |   |   |   |   |   |
|                                                         | (21521) | 21521   | 21530 | 21540 | 21550  | 21560  | 21570 | 21580  | 21590 21600   |         |     |       |       |       |        |      |     |     |     |      |      |     |      |     |    |     |     |    |      |      |     |     |     |    |      |      |     |   |    |   |    |   |     |     |    |     |   |   |   |    |   |     |    |   |   |   |   |   |   |   |   |   |   |   |   |   |   |   |   |   |   |   |   |   |   |   |   |   |   |   |   |   |   |   |   |   |   |   |   |   |   |   |   |   |   |   |   |   |   |   |   |   |   |   |   |   |   |   |   |   |   |   |   |   |   |   |   |   |   |   |   |   |   |   |   |   |   |   |   |   |   |   |   |   |   |   |   |   |   |   |   |   |   |   |   |   |   |   |   |   |   |   |   |   |   |   |   |   |   |   |   |   |   |   |   |   |   |   |   |   |   |   |   |   |   |   |   |   |   |   |   |   |   |   |   |   |   |   |   |   |   |   |   |   |   |   |   |   |   |   |   |   |   |   |   |   |   |   |   |   |   |   |   |   |   |   |   |   |   |   |   |   |   |   |   |   |   |   |   |   |   |   |   |   |   |   |   |   |   |   |   |   |   |   |   |   |   |   |   |   |   |   |   |   |   |   |   |   |   |   |   |   |   |   |   |   |   |   |   |   |   |   |   |   |   |   |   |   |   |   |   |   |   |   |   |   |   |   |   |   |   |   |   |   |   |   |   |   |   |   |   |   |   |   |   |   |   |   |   |   |   |   |   |   |   |   |   |   |   |   |   |   |   |   |   |   |   |   |   |   |   |   |   |   |   |   |   |   |   |   |   |   |   |   |   |   |   |   |   |   |   |   |   |   |   |   |   |   |   |   |   |   |   |   |   |   |   |   |   |   |   |   |   |   |   |   |   |   |   |   |   |   |   |   |   |   |   |   |   |   |   |   |   |   |   |   |   |   |   |   |   |   |   |   |   |   |   |   |   |   |   |   |   |   |   |   |   |   |   |   |   |   |   |   |   |   |   |   |   |   |   |   |   |   |   |   |   |   |   |   |   |   |   |   |   |   |   |   |   |   |   |   |   |   |   |   |   |   |   |   |   |   |   |   |   |   |   |   |   |   |   |   |   |   |   |   |   |   |   |   |   |   |   |   |   |   |   |   |   |   |   |   |   |   |   |   |   |   |   |   |   |   |   |   |   |   |   |   |   |   |   |   |   |   |   |   |   |   |   |   |   |   |   |   |   |   |   |   |   |   |   |   |   |   |   |   |   |   |   |   |   |   |   |   |   |   |   |   |   |   |   |   |   |   |   |   |   |   |   |   |   |   |   |   |   |   |   |   |   |   |   |   |   |   |   |   |   |   |   |   |   |   |   |   |   |   |   |   |   |   |   |   |   |   |   |   |   |   |   |   |   |   |   |   |   |   |   |   |   |   |   |   |   |   |   |   |   |   |   |   |   |   |   |   |   |   |   |   |   |   |   |   |   |   |   |   |   |   |   |   |   |   |   |   |   |   |   |   |   |   |   |   |   |   |   |   |   |   |   |   |   |   |   |   |   |   |   |   |   |   |   |   |   |   |   |   |   |   |   |   |   |   |   |   |   |   |   |   |   |   |   |   |   |   |   |   |   |   |   |   |   |   |   |   |   |   |   |   |   |   |   |   |   |   |   |   |   |   |   |   |   |   |   |   |   |   |   |   |   |   |   |   |   |   |   |   |   |   |   |   |   |   |   |   |   |   |   |   |   |   |   |   |   |   |   |   |   |   |   |   |   |   |   |   |   |   |   |   |   |   |   |
| SARS-CoV-2 Reference Genome NC_045512.2 (21294)         | T       | G       | G     | CA    | AA     | C      | C     | G      | C             | G       | AA  | CAAA  | TAGAT | TGGTT | AT     | G    | T   | C   | A   | T    | G    | C   | A    | T   | G  | C   | AA  | A  | T    | TAC  | A   | T   | A   | T  | T    | T    | G   | G | A  | G | A  | A | TAC | AAA | TC | C   | A | A | T | T  | C | A   | G  | T |   |   |   |   |   |   |   |   |   |   |   |   |   |   |   |   |   |   |   |   |   |   |   |   |   |   |   |   |   |   |   |   |   |   |   |   |   |   |   |   |   |   |   |   |   |   |   |   |   |   |   |   |   |   |   |   |   |   |   |   |   |   |   |   |   |   |   |   |   |   |   |   |   |   |   |   |   |   |   |   |   |   |   |   |   |   |   |   |   |   |   |   |   |   |   |   |   |   |   |   |   |   |   |   |   |   |   |   |   |   |   |   |   |   |   |   |   |   |   |   |   |   |   |   |   |   |   |   |   |   |   |   |   |   |   |   |   |   |   |   |   |   |   |   |   |   |   |   |   |   |   |   |   |   |   |   |   |   |   |   |   |   |   |   |   |   |   |   |   |   |   |   |   |   |   |   |   |   |   |   |   |   |   |   |   |   |   |   |   |   |   |   |   |   |   |   |   |   |   |   |   |   |   |   |   |   |   |   |   |   |   |   |   |   |   |   |   |   |   |   |   |   |   |   |   |   |   |   |   |   |   |   |   |   |   |   |   |   |   |   |   |   |   |   |   |   |   |   |   |   |   |   |   |   |   |   |   |   |   |   |   |   |   |   |   |   |   |   |   |   |   |   |   |   |   |   |   |   |   |   |   |   |   |   |   |   |   |   |   |   |   |   |   |   |   |   |   |   |   |   |   |   |   |   |   |   |   |   |   |   |   |   |   |   |   |   |   |   |   |   |   |   |   |   |   |   |   |   |   |   |   |   |   |   |   |   |   |   |   |   |   |   |   |   |   |   |   |   |   |   |   |   |   |   |   |   |   |   |   |   |   |   |   |   |   |   |   |   |   |   |   |   |   |   |   |   |   |   |   |   |   |   |   |   |   |   |   |   |   |   |   |   |   |   |   |   |   |   |   |   |   |   |   |   |   |   |   |   |   |   |   |   |   |   |   |   |   |   |   |   |   |   |   |   |   |   |   |   |   |   |   |   |   |   |   |   |   |   |   |   |   |   |   |   |   |   |   |   |   |   |   |   |   |   |   |   |   |   |   |   |   |   |   |   |   |   |   |   |   |   |   |   |   |   |   |   |   |   |   |   |   |   |   |   |   |   |   |   |   |   |   |   |   |   |   |   |   |   |   |   |   |   |   |   |   |   |   |   |   |   |   |   |   |   |   |   |   |   |   |   |   |   |   |   |   |   |   |   |   |   |   |   |   |   |   |   |   |   |   |   |   |   |   |   |   |   |   |   |   |   |   |   |   |   |   |   |   |   |   |   |   |   |   |   |   |   |   |   |   |   |   |   |   |   |   |   |   |   |   |   |   |   |   |   |   |   |   |   |   |   |   |   |   |   |   |   |   |   |   |   |   |   |   |   |   |   |   |   |   |   |   |   |   |   |   |   |   |   |   |   |   |   |   |   |   |   |   |   |   |   |   |   |   |   |   |   |   |   |   |   |   |   |   |   |   |   |   |   |   |   |   |   |   |   |   |   |   |   |   |   |   |   |   |   |   |   |   |   |   |   |   |   |   |   |   |   |   |   |   |   |   |   |   |   |   |   |   |   |   |   |   |   |   |   |   |   |   |   |   |   |   |   |   |   |   |   |   |   |   |   |   |   |   |   |   |   |   |
| Sulfolobus turreted icosahedral virus NC_005892 (16838) | A       | G       | ---   | AA    | A      | C      | A     | G      | A             | G       | A   | G     | AAA   | C     | A      | G    | C   | T   | A   | C    | A    | G   | A    | T   | C  | T   | A   | T  | AA   | A    | T   | C   | T   | C  | T    | G    | C   | G | AA | A | G  | A | T   | T   | -  | AGG | A | A | G | T  | G | AAA | -- | C | T | A | C | T | A | G | A | T |   |   |   |   |   |   |   |   |   |   |   |   |   |   |   |   |   |   |   |   |   |   |   |   |   |   |   |   |   |   |   |   |   |   |   |   |   |   |   |   |   |   |   |   |   |   |   |   |   |   |   |   |   |   |   |   |   |   |   |   |   |   |   |   |   |   |   |   |   |   |   |   |   |   |   |   |   |   |   |   |   |   |   |   |   |   |   |   |   |   |   |   |   |   |   |   |   |   |   |   |   |   |   |   |   |   |   |   |   |   |   |   |   |   |   |   |   |   |   |   |   |   |   |   |   |   |   |   |   |   |   |   |   |   |   |   |   |   |   |   |   |   |   |   |   |   |   |   |   |   |   |   |   |   |   |   |   |   |   |   |   |   |   |   |   |   |   |   |   |   |   |   |   |   |   |   |   |   |   |   |   |   |   |   |   |   |   |   |   |   |   |   |   |   |   |   |   |   |   |   |   |   |   |   |   |   |   |   |   |   |   |   |   |   |   |   |   |   |   |   |   |   |   |   |   |   |   |   |   |   |   |   |   |   |   |   |   |   |   |   |   |   |   |   |   |   |   |   |   |   |   |   |   |   |   |   |   |   |   |   |   |   |   |   |   |   |   |   |   |   |   |   |   |   |   |   |   |   |   |   |   |   |   |   |   |   |   |   |   |   |   |   |   |   |   |   |   |   |   |   |   |   |   |   |   |   |   |   |   |   |   |   |   |   |   |   |   |   |   |   |   |   |   |   |   |   |   |   |   |   |   |   |   |   |   |   |   |   |   |   |   |   |   |   |   |   |   |   |   |   |   |   |   |   |   |   |   |   |   |   |   |   |   |   |   |   |   |   |   |   |   |   |   |   |   |   |   |   |   |   |   |   |   |   |   |   |   |   |   |   |   |   |   |   |   |   |   |   |   |   |   |   |   |   |   |   |   |   |   |   |   |   |   |   |   |   |   |   |   |   |   |   |   |   |   |   |   |   |   |   |   |   |   |   |   |   |   |   |   |   |   |   |   |   |   |   |   |   |   |   |   |   |   |   |   |   |   |   |   |   |   |   |   |   |   |   |   |   |   |   |   |   |   |   |   |   |   |   |   |   |   |   |   |   |   |   |   |   |   |   |   |   |   |   |   |   |   |   |   |   |   |   |   |   |   |   |   |   |   |   |   |   |   |   |   |   |   |   |   |   |   |   |   |   |   |   |   |   |   |   |   |   |   |   |   |   |   |   |   |   |   |   |   |   |   |   |   |   |   |   |   |   |   |   |   |   |   |   |   |   |   |   |   |   |   |   |   |   |   |   |   |   |   |   |   |   |   |   |   |   |   |   |   |   |   |   |   |   |   |   |   |   |   |   |   |   |   |   |   |   |   |   |   |   |   |   |   |   |   |   |   |   |   |   |   |   |   |   |   |   |   |   |   |   |   |   |   |   |   |   |   |   |   |   |   |   |   |   |   |   |   |   |   |   |   |   |   |   |   |   |   |   |   |   |   |   |   |   |   |   |   |   |   |   |   |   |   |   |   |   |   |   |   |   |   |   |   |   |   |   |   |   |   |   |   |   |   |   |   |   |   |   |   |   |   |   |   |   |   |   |   |   |   |   |   |   |   |   |   |
| Section 271                                             |         |         |       |       |        |        |       |        |               |         |     |       |       |       |        |      |     |     |     |      |      |     |      |     |    |     |     |    |      |      |     |     |     |    |      |      |     |   |    |   |    |   |     |     |    |     |   |   |   |    |   |     |    |   |   |   |   |   |   |   |   |   |   |   |   |   |   |   |   |   |   |   |   |   |   |   |   |   |   |   |   |   |   |   |   |   |   |   |   |   |   |   |   |   |   |   |   |   |   |   |   |   |   |   |   |   |   |   |   |   |   |   |   |   |   |   |   |   |   |   |   |   |   |   |   |   |   |   |   |   |   |   |   |   |   |   |   |   |   |   |   |   |   |   |   |   |   |   |   |   |   |   |   |   |   |   |   |   |   |   |   |   |   |   |   |   |   |   |   |   |   |   |   |   |   |   |   |   |   |   |   |   |   |   |   |   |   |   |   |   |   |   |   |   |   |   |   |   |   |   |   |   |   |   |   |   |   |   |   |   |   |   |   |   |   |   |   |   |   |   |   |   |   |   |   |   |   |   |   |   |   |   |   |   |   |   |   |   |   |   |   |   |   |   |   |   |   |   |   |   |   |   |   |   |   |   |   |   |   |   |   |   |   |   |   |   |   |   |   |   |   |   |   |   |   |   |   |   |   |   |   |   |   |   |   |   |   |   |   |   |   |   |   |   |   |   |   |   |   |   |   |   |   |   |   |   |   |   |   |   |   |   |   |   |   |   |   |   |   |   |   |   |   |   |   |   |   |   |   |   |   |   |   |   |   |   |   |   |   |   |   |   |   |   |   |   |   |   |   |   |   |   |   |   |   |   |   |   |   |   |   |   |   |   |   |   |   |   |   |   |   |   |   |   |   |   |   |   |   |   |   |   |   |   |   |   |   |   |   |   |   |   |   |   |   |   |   |   |   |   |   |   |   |   |   |   |   |   |   |   |   |   |   |   |   |   |   |   |   |   |   |   |   |   |   |   |   |   |   |   |   |   |   |   |   |   |   |   |   |   |   |   |   |   |   |   |   |   |   |   |   |   |   |   |   |   |   |   |   |   |   |   |   |   |   |   |   |   |   |   |   |   |   |   |   |   |   |   |   |   |   |   |   |   |   |   |   |   |   |   |   |   |   |   |   |   |   |   |   |   |   |   |   |   |   |   |   |   |   |   |   |   |   |   |   |   |   |   |   |   |   |   |   |   |   |   |   |   |   |   |   |   |   |   |   |   |   |   |   |   |   |   |   |   |   |   |   |   |   |   |   |   |   |   |   |   |   |   |   |   |   |   |   |   |   |   |   |   |   |   |   |   |   |   |   |   |   |   |   |   |   |   |   |   |   |   |   |   |   |   |   |   |   |   |   |   |   |   |   |   |   |   |   |   |   |   |   |   |   |   |   |   |   |   |   |   |   |   |   |   |   |   |   |   |   |   |   |   |   |   |   |   |   |   |   |   |   |   |   |   |   |   |   |   |   |   |   |   |   |   |   |   |   |   |   |   |   |   |   |   |   |   |   |   |   |   |   |   |   |   |   |   |   |   |   |   |   |   |   |   |   |   |   |   |   |   |   |   |   |   |   |   |   |   |   |   |   |   |   |   |   |   |   |   |   |   |   |   |   |   |   |   |   |   |   |   |   |   |   |   |   |   |   |   |   |   |   |   |   |   |   |   |   |   |   |   |   |   |   |   |   |   |   |   |   |   |   |   |   |   |   |   |   |   |   |   |   |   |   |   |   |   |   |   |   |   |   |   |   |   |   |
|                                                         | (21601) | 21601   | 21610 | 21620 | 21630  | 21640  | 21650 | 21660  | 21670 21680   |         |     |       |       |       |        |      |     |     |     |      |      |     |      |     |    |     |     |    |      |      |     |     |     |    |      |      |     |   |    |   |    |   |     |     |    |     |   |   |   |    |   |     |    |   |   |   |   |   |   |   |   |   |   |   |   |   |   |   |   |   |   |   |   |   |   |   |   |   |   |   |   |   |   |   |   |   |   |   |   |   |   |   |   |   |   |   |   |   |   |   |   |   |   |   |   |   |   |   |   |   |   |   |   |   |   |   |   |   |   |   |   |   |   |   |   |   |   |   |   |   |   |   |   |   |   |   |   |   |   |   |   |   |   |   |   |   |   |   |   |   |   |   |   |   |   |   |   |   |   |   |   |   |   |   |   |   |   |   |   |   |   |   |   |   |   |   |   |   |   |   |   |   |   |   |   |   |   |   |   |   |   |   |   |   |   |   |   |   |   |   |   |   |   |   |   |   |   |   |   |   |   |   |   |   |   |   |   |   |   |   |   |   |   |   |   |   |   |   |   |   |   |   |   |   |   |   |   |   |   |   |   |   |   |   |   |   |   |   |   |   |   |   |   |   |   |   |   |   |   |   |   |   |   |   |   |   |   |   |   |   |   |   |   |   |   |   |   |   |   |   |   |   |   |   |   |   |   |   |   |   |   |   |   |   |   |   |   |   |   |   |   |   |   |   |   |   |   |   |   |   |   |   |   |   |   |   |   |   |   |   |   |   |   |   |   |   |   |   |   |   |   |   |   |   |   |   |   |   |   |   |   |   |   |   |   |   |   |   |   |   |   |   |   |   |   |   |   |   |   |   |   |   |   |   |   |   |   |   |   |   |   |   |   |   |   |   |   |   |   |   |   |   |   |   |   |   |   |   |   |   |   |   |   |   |   |   |   |   |   |   |   |   |   |   |   |   |   |   |   |   |   |   |   |   |   |   |   |   |   |   |   |   |   |   |   |   |   |   |   |   |   |   |   |   |   |   |   |   |   |   |   |   |   |   |   |   |   |   |   |   |   |   |   |   |   |   |   |   |   |   |   |   |   |   |   |   |   |   |   |   |   |   |   |   |   |   |   |   |   |   |   |   |   |   |   |   |   |   |   |   |   |   |   |   |   |   |   |   |   |   |   |   |   |   |   |   |   |   |   |   |   |   |   |   |   |   |   |   |   |   |   |   |   |   |   |   |   |   |   |   |   |   |   |   |   |   |   |   |   |   |   |   |   |   |   |   |   |   |   |   |   |   |   |   |   |   |   |   |   |   |   |   |   |   |   |   |   |   |   |   |   |   |   |   |   |   |   |   |   |   |   |   |   |   |   |   |   |   |   |   |   |   |   |   |   |   |   |   |   |   |   |   |   |   |   |   |   |   |   |   |   |   |   |   |   |   |   |   |   |   |   |   |   |   |   |   |   |   |   |   |   |   |   |   |   |   |   |   |   |   |   |   |   |   |   |   |   |   |   |   |   |   |   |   |   |   |   |   |   |   |   |   |   |   |   |   |   |   |   |   |   |   |   |   |   |   |   |   |   |   |   |   |   |   |   |   |   |   |   |   |   |   |   |   |   |   |   |   |   |   |   |   |   |   |   |   |   |   |   |   |   |   |   |   |   |   |   |   |   |   |   |   |   |   |   |   |   |   |   |   |   |   |   |   |   |   |   |   |   |   |   |   |   |   |   |   |   |   |   |   |   |   |   |   |   |   |   |   |   |   |   |   |   |   |   |   |   |   |   |   |   |
| SARS-CoV-2 Reference Genome NC_045512.2 (21374)         | T       | G       | T     | C     | T      | C      | C     | T      | A             | T       | C   | T     | T     | T     | A      | T    | T   | T   | G   | A    | C    | A   | T    | G   | A  | T   | T   | T  | C    | C    | C   | T   | T   | A  | A    | T    | T   | A | A  | G | G  | G | T   | A   | A  | A   | A | G | A | G  | T |     |    |   |   |   |   |   |   |   |   |   |   |   |   |   |   |   |   |   |   |   |   |   |   |   |   |   |   |   |   |   |   |   |   |   |   |   |   |   |   |   |   |   |   |   |   |   |   |   |   |   |   |   |   |   |   |   |   |   |   |   |   |   |   |   |   |   |   |   |   |   |   |   |   |   |   |   |   |   |   |   |   |   |   |   |   |   |   |   |   |   |   |   |   |   |   |   |   |   |   |   |   |   |   |   |   |   |   |   |   |   |   |   |   |   |   |   |   |   |   |   |   |   |   |   |   |   |   |   |   |   |   |   |   |   |   |   |   |   |   |   |   |   |   |   |   |   |   |   |   |   |   |   |   |   |   |   |   |   |   |   |   |   |   |   |   |   |   |   |   |   |   |   |   |   |   |   |   |   |   |   |   |   |   |   |   |   |   |   |   |   |   |   |   |   |   |   |   |   |   |   |   |   |   |   |   |   |   |   |   |   |   |   |   |   |   |   |   |   |   |   |   |   |   |   |   |   |   |   |   |   |   |   |   |   |   |   |   |   |   |   |   |   |   |   |   |   |   |   |   |   |   |   |   |   |   |   |   |   |   |   |   |   |   |   |   |   |   |   |   |   |   |   |   |   |   |   |   |   |   |   |   |   |   |   |   |   |   |   |   |   |   |   |   |   |   |   |   |   |   |   |   |   |   |   |   |   |   |   |   |   |   |   |   |   |   |   |   |   |   |   |   |   |   |   |   |   |   |   |   |   |   |   |   |   |   |   |   |   |   |   |   |   |   |   |   |   |   |   |   |   |   |   |   |   |   |   |   |   |   |   |   |   |   |   |   |   |   |   |   |   |   |   |   |   |   |   |   |   |   |   |   |   |   |   |   |   |   |   |   |   |   |   |   |   |   |   |   |   |   |   |   |   |   |   |   |   |   |   |   |   |   |   |   |   |   |   |   |   |   |   |   |   |   |   |   |   |   |   |   |   |   |   |   |   |   |   |   |   |   |   |   |   |   |   |   |   |   |   |   |   |   |   |   |   |   |   |   |   |   |   |   |   |   |   |   |   |   |   |   |   |   |   |   |   |   |   |   |   |   |   |   |   |   |   |   |   |   |   |   |   |   |   |   |   |   |   |   |   |   |   |   |   |   |   |   |   |   |   |   |   |   |   |   |   |   |   |   |   |   |   |   |   |   |   |   |   |   |   |   |   |   |   |   |   |   |   |   |   |   |   |   |   |   |   |   |   |   |   |   |   |   |   |   |   |   |   |   |   |   |   |   |   |   |   |   |   |   |   |   |   |   |   |   |   |   |   |   |   |   |   |   |   |   |   |   |   |   |   |   |   |   |   |   |   |   |   |   |   |   |   |   |   |   |   |   |   |   |   |   |   |   |   |   |   |   |   |   |   |   |   |   |   |   |   |   |   |   |   |   |   |   |   |   |   |   |   |   |   |   |   |   |   |   |   |   |   |   |   |   |   |   |   |   |   |   |   |   |   |   |   |   |   |   |   |   |   |   |   |   |   |   |   |   |   |   |   |   |   |   |   |   |   |   |   |   |   |   |   |   |   |   |   |   |   |   |   |   |   |   |   |   |   |   |   |   |   |   |   |   |   |   |   |   |   |   |   |   |   |   |
| Sulfolobus turreted icosahedral virus NC_005892 (16912) | T       | G       | A     | C     | T      | A      | ---   | A      | T             | C       | G   | G     | T     | A     | G      | A    | G   | A   | G   | G    | G    | A   | T    | A   | T  | T   | T   | A  | G    | A    | T   | T   | T   | A  | G    | A    | T   | G | A  | A | T  | T | A   | G   | A  | A   | A | G | A | A  | A | A   | A  | A | A | A | A | A | A | A | A | A | A | A | A | A | A | A | A | A | A | A | A | A | A | A | A | A | A | A | A | A | A | A | A | A | A | A | A | A | A | A | A | A | A | A | A | A | A | A | A | A | A | A | A | A | A | A | A | A | A | A | A | A | A | A | A | A | A | A | A | A | A | A | A | A | A | A | A | A | A | A | A | A | A | A | A | A | A | A | A | A | A | A | A | A | A | A | A | A | A | A | A | A | A | A | A | A | A | A | A | A | A | A | A | A | A | A | A | A | A | A | A | A | A | A | A | A | A | A | A | A | A | A | A | A | A | A | A | A | A | A | A | A | A | A | A | A | A | A | A | A | A | A | A | A | A | A | A | A | A | A | A | A | A | A | A | A | A | A | A | A | A | A | A | A | A | A | A | A | A | A | A | A | A | A | A | A | A | A | A | A | A | A | A | A | A | A | A | A | A | A | A | A | A | A | A | A | A | A | A | A | A | A | A | A | A | A | A | A | A | A | A | A | A | A | A | A | A | A | A | A | A | A | A | A | A | A | A | A | A | A | A | A | A | A | A | A | A | A | A | A | A | A | A | A | A | A | A | A | A | A | A | A | A | A | A | A | A | A | A | A | A | A | A | A | A | A | A | A | A | A | A | A | A | A | A | A | A | A | A | A | A | A | A | A | A | A | A | A | A | A | A | A | A | A | A | A | A | A | A | A | A | A | A | A | A | A | A | A | A | A | A | A | A | A | A | A | A | A | A | A | A | A | A | A | A | A | A | A | A | A | A | A | A | A | A | A | A | A | A | A | A | A | A | A | A | A | A | A | A | A | A | A | A | A | A | A | A | A | A | A | A | A | A | A | A | A | A | A | A | A | A | A | A | A | A | A | A | A | A | A | A | A | A | A | A | A | A | A | A | A | A | A | A | A | A | A | A | A | A | A | A | A | A | A | A | A | A | A | A | A | A | A | A | A | A | A | A | A | A | A | A | A | A | A | A | A | A | A | A | A | A | A | A | A | A | A | A | A | A | A | A | A | A | A | A | A | A | A | A | A | A | A | A | A | A | A | A | A | A | A | A | A | A | A | A | A | A | A | A | A | A | A | A | A | A | A | A | A | A | A | A | A | A | A | A | A | A | A | A | A | A | A | A | A | A | A | A | A | A | A | A | A | A | A | A | A | A | A | A | A | A | A | A | A | A | A | A | A | A | A | A | A | A | A | A | A | A | A | A | A | A | A | A | A | A | A | A | A | A | A | A | A | A | A | A | A | A | A | A | A | A | A | A | A | A | A | A | A | A | A | A | A | A | A | A | A | A | A | A | A | A | A | A | A | A | A | A | A | A | A | A | A | A | A | A | A | A | A | A | A | A | A | A | A | A | A | A | A | A | A | A | A | A | A | A | A | A | A | A | A | A | A | A | A | A | A | A | A | A | A | A | A | A | A | A | A | A | A | A | A | A | A | A | A | A | A | A | A | A | A | A | A | A | A | A | A | A | A | A | A | A | A | A | A | A | A | A | A | A | A | A | A | A | A | A | A | A | A | A | A | A | A | A | A | A | A | A | A | A | A | A | A | A | A | A | A | A | A | A | A | A | A | A | A | A | A | A | A | A | A | A | A | A | A | A | A | A | A | A |

SARS-CoV-2 & Sulfolobus turreted icosahedral virus.apr

|                                                         |         |       |       |       |       |       |       |       |       |       |   |     |     |   |   |   |   |   |   |   |   |   |   |   |   |   |   |   |   |   |   |   |   |   |   |   |   |   |   |   |   |   |   |   |   |   |   |   |   |   |   |   |   |   |   |   |   |   |   |   |   |   |   |   |   |   |   |   |   |   |   |   |   |   |   |   |   |   |   |   |   |   |   |   |   |   |   |   |   |   |   |   |   |   |   |   |   |   |   |   |   |   |   |   |   |   |   |   |   |   |   |   |   |   |   |   |   |   |   |   |   |   |   |   |   |   |   |   |   |   |   |   |   |   |   |   |   |   |   |   |   |   |   |   |   |   |   |   |   |   |   |   |   |   |   |   |   |   |   |   |   |   |   |   |   |   |   |   |   |   |   |   |   |   |   |   |   |   |   |   |   |   |   |   |   |   |   |   |   |   |   |   |   |   |   |   |   |   |   |   |   |   |   |   |   |   |   |   |   |   |   |   |   |   |   |   |   |   |   |   |   |   |   |   |   |   |   |   |   |   |   |   |   |   |   |   |   |   |   |   |   |   |   |   |   |   |   |   |   |   |   |   |   |   |   |   |   |   |   |   |   |   |   |   |   |   |   |   |   |   |   |   |   |   |   |   |   |   |   |   |   |   |   |   |   |   |   |   |   |   |   |   |   |   |   |   |   |   |   |   |   |   |   |   |   |   |   |   |   |   |   |   |   |   |   |   |   |   |   |   |   |   |   |   |   |   |   |   |   |   |   |   |   |   |   |   |   |   |   |   |   |   |   |   |   |   |   |   |   |   |   |   |   |   |   |   |   |   |   |   |   |   |   |   |   |   |   |   |   |   |   |   |   |   |   |   |   |   |   |   |   |   |   |   |   |   |   |   |   |   |   |   |   |   |   |   |   |   |   |   |   |   |   |   |   |   |   |   |   |   |   |   |   |   |   |   |   |   |   |   |   |   |   |   |   |   |   |   |   |   |   |   |   |   |   |   |   |   |   |   |   |   |   |   |   |   |   |   |   |   |   |   |   |   |   |   |   |   |   |   |   |   |   |   |   |   |   |   |   |   |   |   |   |   |   |   |   |   |   |   |   |   |   |   |   |   |   |   |   |   |   |   |   |   |   |   |   |   |   |   |   |   |   |   |   |   |   |   |   |   |   |   |   |   |   |   |   |   |   |   |   |   |   |   |   |   |   |   |   |   |   |   |   |   |   |   |   |   |   |   |   |   |   |   |   |   |   |   |   |   |   |   |   |   |   |   |   |   |   |   |   |   |   |   |   |   |   |   |   |   |   |   |   |   |   |   |   |   |   |   |   |   |   |   |   |   |   |   |   |   |   |   |   |   |   |   |   |   |   |   |   |   |   |   |   |   |   |   |   |   |   |   |   |   |   |   |   |   |   |   |   |   |   |   |   |   |   |   |   |   |   |   |   |   |   |   |   |   |   |   |   |   |   |   |   |   |   |   |   |   |   |   |   |   |   |   |   |   |   |   |   |   |   |   |   |   |   |   |   |   |   |   |   |   |   |   |   |   |   |   |   |   |   |   |   |   |   |   |   |   |   |   |   |   |   |   |   |   |   |   |   |   |   |   |   |   |   |   |   |   |   |   |   |   |   |   |   |   |   |   |   |   |   |   |   |   |   |   |   |   |   |   |   |   |   |   |   |   |   |   |   |   |   |   |   |   |   |   |   |   |   |   |   |   |   |   |   |   |   |   |   |   |   |   |   |   |   |   |   |   |   |   |   |   |   |   |   |   |   |   |   |   |   |   |   |   |   |   |   |   |   |   |   |   |   |   |   |   |   |   |   |   |   |   |   |   |   |   |   |   |   |   |   |   |   |   |   |   |   |   |   |   |   |   |   |   |   |   |   |   |   |   |   |   |   |   |   |   |   |   |   |   |   |   |   |   |   |   |   |   |   |   |   |   |   |   |   |   |   |   |   |   |   |   |   |   |   |   |   |   |   |   |   |   |   |   |   |   |   |   |   |   |   |   |   |   |   |   |   |   |   |   |   |   |   |   |   |   |   |   |   |   |   |   |   |   |   |   |   |   |   |   |   |   |   |   |   |   |   |   |   |   |   |   |   |   |   |   |   |   |   |   |   |   |   |   |   |   |   |   |   |   |   |   |   |   |   |   |   |   |   |   |   |   |   |   |   |   |   |   |   |   |   |   |   |   |   |   |   |   |   |   |   |   |   |   |   |   |   |   |   |   |   |   |   |   |   |   |   |   |   |   |   |   |   |   |   |   |   |   |   |   |   |   |   |   |   |   |   |   |   |   |   |   |   |   |   |   |   |   |   |   |   |   |   |   |   |   |   |   |   |   |   |   |   |   |   |   |   |   |   |   |   |   |   |   |   |   |   |   |   |   |   |   |   |   |   |   |   |   |   |   |   |   |   |   |   |   |   |   |   |   |   |   |   |   |   |   |   |   |   |   |   |   |   |   |   |   |   |   |   |   |   |   |   |   |   |   |   |   |   |   |   |   |   |   |   |   |   |   |   |   |   |   |   |   |   |   |   |   |   |   |   |   |   |   |   |   |   |   |   |   |   |   |   |   |   |   |   |   |   |   |   |   |   |   |   |   |   |   |   |   |   |   |   |   |   |   |   |   |   |   |   |   |   |   |   |   |   |   |   |   |   |   |   |   |   |   |   |   |   |   |   |   |   |   |   |   |   |   |   |   |   |   |   |   |   |   |   |   |   |   |   |   |   |   |   |   |   |   |   |   |   |   |   |   |   |   |   |   |   |   |   |   |   |   |   |   |   |   |   |   |   |   |   |   |   |   |   |   |   |   |   |   |   |   |   |   |   |   |   |   |   |   |   |   |   |   |   |   |   |   |   |   |   |   |   |   |   |   |   |   |   |   |   |   |   |   |   |   |   |   |   |   |   |   |   |   |   |   |   |   |   |   |   |   |   |   |   |   |   |   |   |   |   |   |   |   |   |   |   |   |   |   |   |   |   |   |   |   |   |   |   |   |   |   |   |   |   |   |   |   |   |   |   |   |   |   |   |   |   |   |   |   |   |   |   |
|---------------------------------------------------------|---------|-------|-------|-------|-------|-------|-------|-------|-------|-------|---|-----|-----|---|---|---|---|---|---|---|---|---|---|---|---|---|---|---|---|---|---|---|---|---|---|---|---|---|---|---|---|---|---|---|---|---|---|---|---|---|---|---|---|---|---|---|---|---|---|---|---|---|---|---|---|---|---|---|---|---|---|---|---|---|---|---|---|---|---|---|---|---|---|---|---|---|---|---|---|---|---|---|---|---|---|---|---|---|---|---|---|---|---|---|---|---|---|---|---|---|---|---|---|---|---|---|---|---|---|---|---|---|---|---|---|---|---|---|---|---|---|---|---|---|---|---|---|---|---|---|---|---|---|---|---|---|---|---|---|---|---|---|---|---|---|---|---|---|---|---|---|---|---|---|---|---|---|---|---|---|---|---|---|---|---|---|---|---|---|---|---|---|---|---|---|---|---|---|---|---|---|---|---|---|---|---|---|---|---|---|---|---|---|---|---|---|---|---|---|---|---|---|---|---|---|---|---|---|---|---|---|---|---|---|---|---|---|---|---|---|---|---|---|---|---|---|---|---|---|---|---|---|---|---|---|---|---|---|---|---|---|---|---|---|---|---|---|---|---|---|---|---|---|---|---|---|---|---|---|---|---|---|---|---|---|---|---|---|---|---|---|---|---|---|---|---|---|---|---|---|---|---|---|---|---|---|---|---|---|---|---|---|---|---|---|---|---|---|---|---|---|---|---|---|---|---|---|---|---|---|---|---|---|---|---|---|---|---|---|---|---|---|---|---|---|---|---|---|---|---|---|---|---|---|---|---|---|---|---|---|---|---|---|---|---|---|---|---|---|---|---|---|---|---|---|---|---|---|---|---|---|---|---|---|---|---|---|---|---|---|---|---|---|---|---|---|---|---|---|---|---|---|---|---|---|---|---|---|---|---|---|---|---|---|---|---|---|---|---|---|---|---|---|---|---|---|---|---|---|---|---|---|---|---|---|---|---|---|---|---|---|---|---|---|---|---|---|---|---|---|---|---|---|---|---|---|---|---|---|---|---|---|---|---|---|---|---|---|---|---|---|---|---|---|---|---|---|---|---|---|---|---|---|---|---|---|---|---|---|---|---|---|---|---|---|---|---|---|---|---|---|---|---|---|---|---|---|---|---|---|---|---|---|---|---|---|---|---|---|---|---|---|---|---|---|---|---|---|---|---|---|---|---|---|---|---|---|---|---|---|---|---|---|---|---|---|---|---|---|---|---|---|---|---|---|---|---|---|---|---|---|---|---|---|---|---|---|---|---|---|---|---|---|---|---|---|---|---|---|---|---|---|---|---|---|---|---|---|---|---|---|---|---|---|---|---|---|---|---|---|---|---|---|---|---|---|---|---|---|---|---|---|---|---|---|---|---|---|---|---|---|---|---|---|---|---|---|---|---|---|---|---|---|---|---|---|---|---|---|---|---|---|---|---|---|---|---|---|---|---|---|---|---|---|---|---|---|---|---|---|---|---|---|---|---|---|---|---|---|---|---|---|---|---|---|---|---|---|---|---|---|---|---|---|---|---|---|---|---|---|---|---|---|---|---|---|---|---|---|---|---|---|---|---|---|---|---|---|---|---|---|---|---|---|---|---|---|---|---|---|---|---|---|---|---|---|---|---|---|---|---|---|---|---|---|---|---|---|---|---|---|---|---|---|---|---|---|---|---|---|---|---|---|---|---|---|---|---|---|---|---|---|---|---|---|---|---|---|---|---|---|---|---|---|---|---|---|---|---|---|---|---|---|---|---|---|---|---|---|---|---|---|---|---|---|---|---|---|---|---|---|---|---|---|---|---|---|---|---|---|---|---|---|---|---|---|---|---|---|---|---|---|---|---|---|---|---|---|---|---|---|---|---|---|---|---|---|---|---|---|---|---|---|---|---|---|---|---|---|---|---|---|---|---|---|---|---|---|---|---|---|---|---|---|---|---|---|---|---|---|---|---|---|---|---|---|---|---|---|---|---|---|---|---|---|---|---|---|---|---|---|---|---|---|---|---|---|---|---|---|---|---|---|---|---|---|---|---|---|---|---|---|---|---|---|---|---|---|---|---|---|---|---|---|---|---|---|---|---|---|---|---|---|---|---|---|---|---|---|---|---|---|---|---|---|---|---|---|---|---|---|---|---|---|---|---|---|---|---|---|---|---|---|---|---|---|---|---|---|---|---|---|---|---|---|---|---|---|---|---|---|---|---|---|---|---|---|---|---|---|---|---|---|---|---|---|---|---|---|---|---|---|---|---|---|---|---|---|---|---|---|---|---|---|---|---|---|---|---|---|---|---|---|---|---|---|---|---|---|---|---|---|---|---|---|---|---|---|---|---|---|---|---|---|---|---|---|---|---|---|---|---|---|---|---|---|---|---|---|---|---|---|---|---|---|---|---|---|---|---|---|---|---|---|---|---|---|---|---|---|---|---|---|---|---|---|---|---|---|---|---|---|---|---|---|---|---|---|---|---|---|---|---|---|---|---|---|---|---|---|---|---|---|---|---|---|---|---|---|---|---|---|---|---|---|---|---|---|---|---|---|---|---|---|---|---|---|---|---|---|---|---|---|---|---|---|---|---|---|---|---|---|---|---|---|---|---|---|---|---|---|---|---|---|---|---|---|---|---|---|---|---|---|---|---|---|---|---|---|---|---|---|---|---|---|---|---|---|---|---|---|---|---|---|---|---|---|---|---|---|---|---|---|---|---|---|---|---|---|---|---|---|---|---|---|---|---|---|---|---|---|---|---|---|---|---|---|---|---|---|---|---|---|---|---|---|---|---|---|---|---|---|---|---|---|---|---|---|---|---|---|---|---|---|---|---|---|---|---|---|---|---|---|---|---|---|---|---|---|---|---|---|---|---|---|---|---|---|---|---|---|---|---|---|---|---|---|---|---|---|---|---|---|---|---|---|---|---|---|---|---|---|---|---|---|---|---|---|---|---|---|---|---|---|---|---|---|---|---|---|---|---|---|---|---|---|---|---|---|---|---|---|---|---|---|---|---|---|---|---|---|---|---|---|---|---|---|---|---|---|---|---|---|---|---|---|---|
| Section 274                                             |         |       |       |       |       |       |       |       |       |       |   |     |     |   |   |   |   |   |   |   |   |   |   |   |   |   |   |   |   |   |   |   |   |   |   |   |   |   |   |   |   |   |   |   |   |   |   |   |   |   |   |   |   |   |   |   |   |   |   |   |   |   |   |   |   |   |   |   |   |   |   |   |   |   |   |   |   |   |   |   |   |   |   |   |   |   |   |   |   |   |   |   |   |   |   |   |   |   |   |   |   |   |   |   |   |   |   |   |   |   |   |   |   |   |   |   |   |   |   |   |   |   |   |   |   |   |   |   |   |   |   |   |   |   |   |   |   |   |   |   |   |   |   |   |   |   |   |   |   |   |   |   |   |   |   |   |   |   |   |   |   |   |   |   |   |   |   |   |   |   |   |   |   |   |   |   |   |   |   |   |   |   |   |   |   |   |   |   |   |   |   |   |   |   |   |   |   |   |   |   |   |   |   |   |   |   |   |   |   |   |   |   |   |   |   |   |   |   |   |   |   |   |   |   |   |   |   |   |   |   |   |   |   |   |   |   |   |   |   |   |   |   |   |   |   |   |   |   |   |   |   |   |   |   |   |   |   |   |   |   |   |   |   |   |   |   |   |   |   |   |   |   |   |   |   |   |   |   |   |   |   |   |   |   |   |   |   |   |   |   |   |   |   |   |   |   |   |   |   |   |   |   |   |   |   |   |   |   |   |   |   |   |   |   |   |   |   |   |   |   |   |   |   |   |   |   |   |   |   |   |   |   |   |   |   |   |   |   |   |   |   |   |   |   |   |   |   |   |   |   |   |   |   |   |   |   |   |   |   |   |   |   |   |   |   |   |   |   |   |   |   |   |   |   |   |   |   |   |   |   |   |   |   |   |   |   |   |   |   |   |   |   |   |   |   |   |   |   |   |   |   |   |   |   |   |   |   |   |   |   |   |   |   |   |   |   |   |   |   |   |   |   |   |   |   |   |   |   |   |   |   |   |   |   |   |   |   |   |   |   |   |   |   |   |   |   |   |   |   |   |   |   |   |   |   |   |   |   |   |   |   |   |   |   |   |   |   |   |   |   |   |   |   |   |   |   |   |   |   |   |   |   |   |   |   |   |   |   |   |   |   |   |   |   |   |   |   |   |   |   |   |   |   |   |   |   |   |   |   |   |   |   |   |   |   |   |   |   |   |   |   |   |   |   |   |   |   |   |   |   |   |   |   |   |   |   |   |   |   |   |   |   |   |   |   |   |   |   |   |   |   |   |   |   |   |   |   |   |   |   |   |   |   |   |   |   |   |   |   |   |   |   |   |   |   |   |   |   |   |   |   |   |   |   |   |   |   |   |   |   |   |   |   |   |   |   |   |   |   |   |   |   |   |   |   |   |   |   |   |   |   |   |   |   |   |   |   |   |   |   |   |   |   |   |   |   |   |   |   |   |   |   |   |   |   |   |   |   |   |   |   |   |   |   |   |   |   |   |   |   |   |   |   |   |   |   |   |   |   |   |   |   |   |   |   |   |   |   |   |   |   |   |   |   |   |   |   |   |   |   |   |   |   |   |   |   |   |   |   |   |   |   |   |   |   |   |   |   |   |   |   |   |   |   |   |   |   |   |   |   |   |   |   |   |   |   |   |   |   |   |   |   |   |   |   |   |   |   |   |   |   |   |   |   |   |   |   |   |   |   |   |   |   |   |   |   |   |   |   |   |   |   |   |   |   |   |   |   |   |   |   |   |   |   |   |   |   |   |   |   |   |   |   |   |   |   |   |   |   |   |   |   |   |   |   |   |   |   |   |   |   |   |   |   |   |   |   |   |   |   |   |   |   |   |   |   |   |   |   |   |   |   |   |   |   |   |   |   |   |   |   |   |   |   |   |   |   |   |   |   |   |   |   |   |   |   |   |   |   |   |   |   |   |   |   |   |   |   |   |   |   |   |   |   |   |   |   |   |   |   |   |   |   |   |   |   |   |   |   |   |   |   |   |   |   |   |   |   |   |   |   |   |   |   |   |   |   |   |   |   |   |   |   |   |   |   |   |   |   |   |   |   |   |   |   |   |   |   |   |   |   |   |   |   |   |   |   |   |   |   |   |   |   |   |   |   |   |   |   |   |   |   |   |   |   |   |   |   |   |   |   |   |   |   |   |   |   |   |   |   |   |   |   |   |   |   |   |   |   |   |   |   |   |   |   |   |   |   |   |   |   |   |   |   |   |   |   |   |   |   |   |   |   |   |   |   |   |   |   |   |   |   |   |   |   |   |   |   |   |   |   |   |   |   |   |   |   |   |   |   |   |   |   |   |   |   |   |   |   |   |   |   |   |   |   |   |   |   |   |   |   |   |   |   |   |   |   |   |   |   |   |   |   |   |   |   |   |   |   |   |   |   |   |   |   |   |   |   |   |   |   |   |   |   |   |   |   |   |   |   |   |   |   |   |   |   |   |   |   |   |   |   |   |   |   |   |   |   |   |   |   |   |   |   |   |   |   |   |   |   |   |   |   |   |   |   |   |   |   |   |   |   |   |   |   |   |   |   |   |   |   |   |   |   |   |   |   |   |   |   |   |   |   |   |   |   |   |   |   |   |   |   |   |   |   |   |   |   |   |   |   |   |   |   |   |   |   |   |   |   |   |   |   |   |   |   |   |   |   |   |   |   |   |   |   |   |   |   |   |   |   |   |   |   |   |   |   |   |   |   |   |   |   |   |   |   |   |   |   |   |   |   |   |   |   |   |   |   |   |   |   |   |   |   |   |   |   |   |   |   |   |   |   |   |   |   |   |   |   |   |   |   |   |   |   |   |   |   |   |   |   |   |   |   |   |   |   |   |   |   |   |   |   |   |   |   |   |   |   |   |   |   |   |   |   |   |   |   |   |   |   |   |   |   |   |   |   |   |   |   |   |   |   |   |   |   |   |   |   |   |   |   |   |   |   |   |   |   |   |   |   |   |   |   |   |   |   |   |   |   |   |   |   |   |   |   |   |   |   |   |   |   |   |   |   |   |   |   |   |   |   |   |   |   |   |   |   |   |   |   |   |   |   |   |   |   |   |
|                                                         | (21841) | 21841 | 21850 | 21860 | 21870 | 21880 | 21890 | 21900 | 21910 | 21920 |   |     |     |   |   |   |   |   |   |   |   |   |   |   |   |   |   |   |   |   |   |   |   |   |   |   |   |   |   |   |   |   |   |   |   |   |   |   |   |   |   |   |   |   |   |   |   |   |   |   |   |   |   |   |   |   |   |   |   |   |   |   |   |   |   |   |   |   |   |   |   |   |   |   |   |   |   |   |   |   |   |   |   |   |   |   |   |   |   |   |   |   |   |   |   |   |   |   |   |   |   |   |   |   |   |   |   |   |   |   |   |   |   |   |   |   |   |   |   |   |   |   |   |   |   |   |   |   |   |   |   |   |   |   |   |   |   |   |   |   |   |   |   |   |   |   |   |   |   |   |   |   |   |   |   |   |   |   |   |   |   |   |   |   |   |   |   |   |   |   |   |   |   |   |   |   |   |   |   |   |   |   |   |   |   |   |   |   |   |   |   |   |   |   |   |   |   |   |   |   |   |   |   |   |   |   |   |   |   |   |   |   |   |   |   |   |   |   |   |   |   |   |   |   |   |   |   |   |   |   |   |   |   |   |   |   |   |   |   |   |   |   |   |   |   |   |   |   |   |   |   |   |   |   |   |   |   |   |   |   |   |   |   |   |   |   |   |   |   |   |   |   |   |   |   |   |   |   |   |   |   |   |   |   |   |   |   |   |   |   |   |   |   |   |   |   |   |   |   |   |   |   |   |   |   |   |   |   |   |   |   |   |   |   |   |   |   |   |   |   |   |   |   |   |   |   |   |   |   |   |   |   |   |   |   |   |   |   |   |   |   |   |   |   |   |   |   |   |   |   |   |   |   |   |   |   |   |   |   |   |   |   |   |   |   |   |   |   |   |   |   |   |   |   |   |   |   |   |   |   |   |   |   |   |   |   |   |   |   |   |   |   |   |   |   |   |   |   |   |   |   |   |   |   |   |   |   |   |   |   |   |   |   |   |   |   |   |   |   |   |   |   |   |   |   |   |   |   |   |   |   |   |   |   |   |   |   |   |   |   |   |   |   |   |   |   |   |   |   |   |   |   |   |   |   |   |   |   |   |   |   |   |   |   |   |   |   |   |   |   |   |   |   |   |   |   |   |   |   |   |   |   |   |   |   |   |   |   |   |   |   |   |   |   |   |   |   |   |   |   |   |   |   |   |   |   |   |   |   |   |   |   |   |   |   |   |   |   |   |   |   |   |   |   |   |   |   |   |   |   |   |   |   |   |   |   |   |   |   |   |   |   |   |   |   |   |   |   |   |   |   |   |   |   |   |   |   |   |   |   |   |   |   |   |   |   |   |   |   |   |   |   |   |   |   |   |   |   |   |   |   |   |   |   |   |   |   |   |   |   |   |   |   |   |   |   |   |   |   |   |   |   |   |   |   |   |   |   |   |   |   |   |   |   |   |   |   |   |   |   |   |   |   |   |   |   |   |   |   |   |   |   |   |   |   |   |   |   |   |   |   |   |   |   |   |   |   |   |   |   |   |   |   |   |   |   |   |   |   |   |   |   |   |   |   |   |   |   |   |   |   |   |   |   |   |   |   |   |   |   |   |   |   |   |   |   |   |   |   |   |   |   |   |   |   |   |   |   |   |   |   |   |   |   |   |   |   |   |   |   |   |   |   |   |   |   |   |   |   |   |   |   |   |   |   |   |   |   |   |   |   |   |   |   |   |   |   |   |   |   |   |   |   |   |   |   |   |   |   |   |   |   |   |   |   |   |   |   |   |   |   |   |   |   |   |   |   |   |   |   |   |   |   |   |   |   |   |   |   |   |   |   |   |   |   |   |   |   |   |   |   |   |   |   |   |   |   |   |   |   |   |   |   |   |   |   |   |   |   |   |   |   |   |   |   |   |   |   |   |   |   |   |   |   |   |   |   |   |   |   |   |   |   |   |   |   |   |   |   |   |   |   |   |   |   |   |   |   |   |   |   |   |   |   |   |   |   |   |   |   |   |   |   |   |   |   |   |   |   |   |   |   |   |   |   |   |   |   |   |   |   |   |   |   |   |   |   |   |   |   |   |   |   |   |   |   |   |   |   |   |   |   |   |   |   |   |   |   |   |   |   |   |   |   |   |   |   |   |   |   |   |   |   |   |   |   |   |   |   |   |   |   |   |   |   |   |   |   |   |   |   |   |   |   |   |   |   |   |   |   |   |   |   |   |   |   |   |   |   |   |   |   |   |   |   |   |   |   |   |   |   |   |   |   |   |   |   |   |   |   |   |   |   |   |   |   |   |   |   |   |   |   |   |   |   |   |   |   |   |   |   |   |   |   |   |   |   |   |   |   |   |   |   |   |   |   |   |   |   |   |   |   |   |   |   |   |   |   |   |   |   |   |   |   |   |   |   |   |   |   |   |   |   |   |   |   |   |   |   |   |   |   |   |   |   |   |   |   |   |   |   |   |   |   |   |   |   |   |   |   |   |   |   |   |   |   |   |   |   |   |   |   |   |   |   |   |   |   |   |   |   |   |   |   |   |   |   |   |   |   |   |   |   |   |   |   |   |   |   |   |   |   |   |   |   |   |   |   |   |   |   |   |   |   |   |   |   |   |   |   |   |   |   |   |   |   |   |   |   |   |   |   |   |   |   |   |   |   |   |   |   |   |   |   |   |   |   |   |   |   |   |   |   |   |   |   |   |   |   |   |   |   |   |   |   |   |   |   |   |   |   |   |   |   |   |   |   |   |   |   |   |   |   |   |   |   |   |   |   |   |   |   |   |   |   |   |   |   |   |   |   |   |   |   |   |   |   |   |   |   |   |   |   |   |   |   |   |   |   |   |   |   |   |   |   |   |   |   |   |   |   |   |   |   |   |   |   |   |   |   |   |   |   |   |   |   |   |   |   |   |   |   |   |   |   |   |   |   |   |   |   |   |   |   |   |   |   |   |   |   |   |   |   |   |   |   |   |   |   |   |   |   |   |   |   |   |   |   |   |   |   |   |   |   |   |   |   |   |   |   |   |   |   |   |   |   |   |   |   |   |   |   |   |   |   |   |   |   |   |   |   |   |   |   |   |   |   |
| SARS-CoV-2 Reference Genome NC_045512.2 (21613)         |         | TC    | T     | T     | A     | CA    | ACC   | A     | G     | A     | A | CTC | --- | A | A | T | T | A | C | C | C | C | T | G | C | A | T | A | C | A | C | T | G | A | C | A | A | G | T |   |   |   |   |   |   |   |   |   |   |   |   |   |   |   |   |   |   |   |   |   |   |   |   |   |   |   |   |   |   |   |   |   |   |   |   |   |   |   |   |   |   |   |   |   |   |   |   |   |   |   |   |   |   |   |   |   |   |   |   |   |   |   |   |   |   |   |   |   |   |   |   |   |   |   |   |   |   |   |   |   |   |   |   |   |   |   |   |   |   |   |   |   |   |   |   |   |   |   |   |   |   |   |   |   |   |   |   |   |   |   |   |   |   |   |   |   |   |   |   |   |   |   |   |   |   |   |   |   |   |   |   |   |   |   |   |   |   |   |   |   |   |   |   |   |   |   |   |   |   |   |   |   |   |   |   |   |   |   |   |   |   |   |   |   |   |   |   |   |   |   |   |   |   |   |   |   |   |   |   |   |   |   |   |   |   |   |   |   |   |   |   |   |   |   |   |   |   |   |   |   |   |   |   |   |   |   |   |   |   |   |   |   |   |   |   |   |   |   |   |   |   |   |   |   |   |   |   |   |   |   |   |   |   |   |   |   |   |   |   |   |   |   |   |   |   |   |   |   |   |   |   |   |   |   |   |   |   |   |   |   |   |   |   |   |   |   |   |   |   |   |   |   |   |   |   |   |   |   |   |   |   |   |   |   |   |   |   |   |   |   |   |   |   |   |   |   |   |   |   |   |   |   |   |   |   |   |   |   |   |   |   |   |   |   |   |   |   |   |   |   |   |   |   |   |   |   |   |   |   |   |   |   |   |   |   |   |   |   |   |   |   |   |   |   |   |   |   |   |   |   |   |   |   |   |   |   |   |   |   |   |   |   |   |   |   |   |   |   |   |   |   |   |   |   |   |   |   |   |   |   |   |   |   |   |   |   |   |   |   |   |   |   |   |   |   |   |   |   |   |   |   |   |   |   |   |   |   |   |   |   |   |   |   |   |   |   |   |   |   |   |   |   |   |   |   |   |   |   |   |   |   |   |   |   |   |   |   |   |   |   |   |   |   |   |   |   |   |   |   |   |   |   |   |   |   |   |   |   |   |   |   |   |   |   |   |   |   |   |   |   |   |   |   |   |   |   |   |   |   |   |   |   |   |   |   |   |   |   |   |   |   |   |   |   |   |   |   |   |   |   |   |   |   |   |   |   |   |   |   |   |   |   |   |   |   |   |   |   |   |   |   |   |   |   |   |   |   |   |   |   |   |   |   |   |   |   |   |   |   |   |   |   |   |   |   |   |   |   |   |   |   |   |   |   |   |   |   |   |   |   |   |   |   |   |   |   |   |   |   |   |   |   |   |   |   |   |   |   |   |   |   |   |   |   |   |   |   |   |   |   |   |   |   |   |   |   |   |   |   |   |   |   |   |   |   |   |   |   |   |   |   |   |   |   |   |   |   |   |   |   |   |   |   |   |   |   |   |   |   |   |   |   |   |   |   |   |   |   |   |   |   |   |   |   |   |   |   |   |   |   |   |   |   |   |   |   |   |   |   |   |   |   |   |   |   |   |   |   |   |   |   |   |   |   |   |   |   |   |   |   |   |   |   |   |   |   |   |   |   |   |   |   |   |   |   |   |   |   |   |   |   |   |   |   |   |   |   |   |   |   |   |   |   |   |   |   |   |   |   |   |   |   |   |   |   |   |   |   |   |   |   |   |   |   |   |   |   |   |   |   |   |   |   |   |   |   |   |   |   |   |   |   |   |   |   |   |   |   |   |   |   |   |   |   |   |   |   |   |   |   |   |   |   |   |   |   |   |   |   |   |   |   |   |   |   |   |   |   |   |   |   |   |   |   |   |   |   |   |   |   |   |   |   |   |   |   |   |   |   |   |   |   |   |   |   |   |   |   |   |   |   |   |   |   |   |   |   |   |   |   |   |   |   |   |   |   |   |   |   |   |   |   |   |   |   |   |   |   |   |   |   |   |   |   |   |   |   |   |   |   |   |   |   |   |   |   |   |   |   |   |   |   |   |   |   |   |   |   |   |   |   |   |   |   |   |   |   |   |   |   |   |   |   |   |   |   |   |   |   |   |   |   |   |   |   |   |   |   |   |   |   |   |   |   |   |   |   |   |   |   |   |   |   |   |   |   |   |   |   |   |   |   |   |   |   |   |   |   |   |   |   |   |   |   |   |   |   |   |   |   |   |   |   |   |   |   |   |   |   |   |   |   |   |   |   |   |   |   |   |   |   |   |   |   |   |   |   |   |   |   |   |   |   |   |   |   |   |   |   |   |   |   |   |   |   |   |   |   |   |   |   |   |   |   |   |   |   |   |   |   |   |   |   |   |   |   |   |   |   |   |   |   |   |   |   |   |   |   |   |   |   |   |   |   |   |   |   |   |   |   |   |   |   |   |   |   |   |   |   |   |   |   |   |   |   |   |   |   |   |   |   |   |   |   |   |   |   |   |   |   |   |   |   |   |   |   |   |   |   |   |   |   |   |   |   |   |   |   |   |   |   |   |   |   |   |   |   |   |   |   |   |   |   |   |   |   |   |   |   |   |   |   |   |   |   |   |   |   |   |   |   |   |   |   |   |   |   |   |   |   |   |   |   |   |   |   |   |   |   |   |   |   |   |   |   |   |   |   |   |   |   |   |   |   |   |   |   |   |   |   |   |   |   |   |   |   |   |   |   |   |   |   |   |   |   |   |   |   |   |   |   |   |   |   |   |   |   |   |   |   |   |   |   |   |   |   |   |   |   |   |   |   |   |   |   |   |   |   |   |   |   |   |   |   |   |   |   |   |   |   |   |   |   |   |   |   |   |   |   |   |   |   |   |   |   |   |   |   |   |   |   |   |   |   |   |   |   |   |   |   |   |   |   |   |   |   |   |   |   |   |   |   |   |   |   |   |   |   |   |   |   |   |   |   |   |   |   |   |   |   |   |   |   |   |   |   |   |   |   |   |   |   |   |   |   |   |   |   |   |   |   |   |   |   |   |   |   |
| Sulfolobus turreted icosahedral virus NC_005892 (17137) |         | TC    | G     | G     | A     | G     | G     | C     | G     | A     | A | A   | A   | A | A | A | A | G | G | A | A | A | A | A | A | A | A | A | A | A | A | A | A | A | A | A | A | A | A | A | A | A | A | A | A | A | A | A | A | A | A | A | A | A | A | A | A | A | A | A | A | A | A | A | A | A | A | A | A | A | A | A | A | A | A | A | A | A | A | A | A | A | A | A | A | A | A | A | A | A | A | A | A | A | A | A | A | A | A | A | A | A | A | A | A | A | A | A | A | A | A | A | A | A | A | A | A | A | A | A | A | A | A | A | A | A | A | A | A | A | A | A | A | A | A | A | A | A | A | A | A | A | A | A | A | A | A | A | A | A | A | A | A | A | A | A | A | A | A | A | A | A | A | A | A | A | A | A | A | A | A | A | A | A | A | A | A | A | A | A | A | A | A | A | A | A | A | A | A | A | A | A | A | A | A | A | A | A | A | A | A | A | A | A | A | A | A | A | A | A | A | A | A | A | A | A | A | A | A | A | A | A | A | A | A | A | A | A | A | A | A | A | A | A | A | A | A | A | A | A | A | A | A | A | A | A | A | A | A | A | A | A | A | A | A | A | A | A | A | A | A | A | A | A | A | A | A | A | A | A | A | A | A | A | A | A | A | A | A | A | A | A | A | A | A | A | A | A | A | A | A | A | A | A | A | A | A | A | A | A | A | A | A | A | A | A | A | A | A | A | A | A | A | A | A | A | A | A | A | A | A | A | A | A | A | A | A | A | A | A | A | A | A | A | A | A | A | A | A | A | A | A | A | A | A | A | A | A | A | A | A | A | A | A | A | A | A | A | A | A | A | A | A | A | A | A | A | A | A | A | A | A | A | A | A | A | A | A | A | A | A | A | A | A | A | A | A | A | A | A | A | A | A | A | A | A | A | A | A | A | A | A | A | A | A | A | A | A | A | A | A | A | A | A | A | A | A | A | A | A | A | A | A | A | A | A | A | A | A | A | A | A | A | A | A | A | A | A | A | A | A | A | A | A | A | A | A | A | A | A | A | A | A | A | A | A | A | A | A | A | A | A | A | A | A | A | A | A | A | A | A | A | A | A | A | A | A | A | A | A | A | A | A | A | A | A | A | A | A | A | A | A | A | A | A | A | A | A | A | A | A | A | A | A | A | A | A | A | A | A | A | A | A | A | A | A | A | A | A | A | A | A | A | A | A | A | A | A | A | A | A | A | A | A | A | A | A | A | A | A | A | A | A | A | A | A | A | A | A | A | A | A | A | A | A | A | A | A | A | A | A | A | A | A | A | A | A | A | A | A | A | A | A | A | A | A | A | A | A | A | A | A | A | A | A | A | A | A | A | A | A | A | A | A | A | A | A | A | A | A | A | A | A | A | A | A | A | A | A | A | A | A | A | A | A | A | A | A | A | A | A | A | A | A | A | A | A | A | A | A | A | A | A | A | A | A | A | A | A | A | A | A | A | A | A | A | A | A | A | A | A | A | A | A | A | A | A | A | A | A | A | A | A | A | A | A | A | A | A | A | A | A | A | A | A | A | A | A | A | A | A | A | A | A | A | A | A | A | A | A | A | A | A | A | A | A | A | A | A | A | A | A | A | A | A | A | A | A | A | A | A | A | A | A | A | A | A | A | A | A | A | A | A | A | A | A | A | A | A | A | A | A | A | A | A | A | A | A | A | A | A | A | A | A | A | A | A | A | A | A | A | A | A | A | A | A | A | A | A | A | A | A | A | A | A | A | A | A | A | A | A | A | A | A | A | A | A | A | A | A | A | A | A | A | A | A | A | A | A | A | A | A | A | A | A | A | A | A | A | A | A | A | A | A | A | A | A | A | A | A | A | A | A | A | A | A | A | A | A | A | A | A | A | A | A | A | A | A | A | A | A | A | A | A | A | A | A | A | A | A | A | A | A | A | A | A | A | A | A | A | A | A | A | A | A | A | A | A | A | A | A | A | A | A | A | A | A | A | A | A | A | A | A | A | A | A | A | A | A | A | A | A | A | A | A | A | A | A | A | A | A | A | A | A | A | A | A | A | A | A | A | A | A | A | A | A | A | A | A | A | A | A | A | A | A | A | A | A | A | A | A | A | A | A | A | A | A | A | A | A | A | A | A | A | A | A | A | A | A | A | A | A | A | A | A | A | A | A | A | A | A | A | A | A | A | A | A | A | A | A | A | A | A | A | A | A | A | A | A | A | A | A | A | A | A | A | A | A | A | A | A | A | A | A | A | A | A | A | A | A | A | A | A | A | A | A | A | A | A | A | A | A | A | A | A | A | A | A | A | A | A | A | A | A | A | A | A | A | A | A | A | A | A | A | A | A | A | A | A | A | A | A | A | A | A | A | A | A | A | A | A | A | A | A | A | A | A | A | A | A | A | A | A | A | A | A | A | A | A | A | A | A | A | A | A | A | A | A | A | A | A | A | A | A | A | A | A | A | A | A | A | A | A | A | A | A | A | A | A | A | A | A | A | A | A | A | A | A | A | A | A | A | A | A | A | A | A | A | A | A | A | A | A | A | A | A | A | A | A | A | A | A | A | A | A | A | A | A | A | A | A | A | A | A | A | A | A | A | A | A | A | A | A | A | A | A | A | A | A | A | A | A | A | A | A | A | A | A | A | A | A | A | A | A | A | A | A | A | A | A | A | A | A | A | A | A | A | A | A | A | A | A | A | A | A | A | A | A | A | A | A | A | A | A | A | A | A | A | A | A | A | A | A | A | A | A | A | A | A | A | A | A | A | A | A | A | A | A | A | A | A | A | A | A | A | A | A | A | A | A | A | A | A | A | A | A | A | A | A | A | A | A | A | A | A | A | A | A | A | A | A | A | A | A | A | A | A | A | A | A | A | A | A | A | A | A | A | A | A | A | A | A | A | A | A | A | A | A | A | A | A | A | A | A | A | A | A | A | A | A | A | A | A | A | A | A | A | A | A | A | A | A | A | A | A | A | A | A | A | A | A | A | A | A | A | A | A | A | A | A | A | A | A | A | A | A | A | A | A | A | A | A | A | A | A | A | A | A | A | A | A | A | A | A | A | A | A |



SARS-CoV-2 & Sulfolobus turreted icosahedral virus.apr

|                                                 |         |                                                                                   |                       |                       |                       |                       |                       |                       |                                             |
|-------------------------------------------------|---------|-----------------------------------------------------------------------------------|-----------------------|-----------------------|-----------------------|-----------------------|-----------------------|-----------------------|---------------------------------------------|
|                                                 |         | Section 281                                                                       |                       |                       |                       |                       |                       |                       |                                             |
|                                                 | (22401) | <a href="#">22401</a>                                                             | <a href="#">22410</a> | <a href="#">22420</a> | <a href="#">22430</a> | <a href="#">22440</a> | <a href="#">22450</a> | <a href="#">22460</a> | <a href="#">22470</a> <a href="#">22480</a> |
| SARS-CoV-2 Reference Genome NC_045512.2         | (22165) | TAAAAATATATTCTAAGCACACGCCTATTAATTTAGTGCCTGATCTCCCTCAGGGTTTTTCGGCTTTAGAACCATTGGTAG |                       |                       |                       |                       |                       |                       |                                             |
| Sulfolobus turreted icosahedral virus NC_005892 | (17664) | -----                                                                             |                       |                       |                       |                       |                       |                       |                                             |
|                                                 |         | Section 282                                                                       |                       |                       |                       |                       |                       |                       |                                             |
|                                                 | (22481) | <a href="#">22481</a>                                                             | <a href="#">22490</a> | <a href="#">22500</a> | <a href="#">22510</a> | <a href="#">22520</a> | <a href="#">22530</a> | <a href="#">22540</a> | <a href="#">22550</a> <a href="#">22560</a> |
| SARS-CoV-2 Reference Genome NC_045512.2         | (22245) | ATTTGCCAATAGGTATTAACATCACTAGGTTTTCAAACCTTACTTGCTTTACATAGAAGTTATTTGACTCCTGGTGATTCT |                       |                       |                       |                       |                       |                       |                                             |
| Sulfolobus turreted icosahedral virus NC_005892 | (17664) | -----                                                                             |                       |                       |                       |                       |                       |                       |                                             |
|                                                 |         | Section 283                                                                       |                       |                       |                       |                       |                       |                       |                                             |
|                                                 | (22561) | <a href="#">22561</a>                                                             | <a href="#">22570</a> | <a href="#">22580</a> | <a href="#">22590</a> | <a href="#">22600</a> | <a href="#">22610</a> | <a href="#">22620</a> | <a href="#">22630</a> <a href="#">22640</a> |
| SARS-CoV-2 Reference Genome NC_045512.2         | (22325) | TCTTCAGGTTGGACAGCTGGTGCTGCAGCTTATTATGTGGGTTATCTTCAACCTAGGACTTTTCTATTAAAAATATAATGA |                       |                       |                       |                       |                       |                       |                                             |
| Sulfolobus turreted icosahedral virus NC_005892 | (17664) | -----                                                                             |                       |                       |                       |                       |                       |                       |                                             |
|                                                 |         | Section 284                                                                       |                       |                       |                       |                       |                       |                       |                                             |
|                                                 | (22641) | <a href="#">22641</a>                                                             | <a href="#">22650</a> | <a href="#">22660</a> | <a href="#">22670</a> | <a href="#">22680</a> | <a href="#">22690</a> | <a href="#">22700</a> | <a href="#">22710</a> <a href="#">22720</a> |
| SARS-CoV-2 Reference Genome NC_045512.2         | (22405) | AAATGGAACCATTACAGATGCTGTAGACTGTGCACCTTGACCCTCTCTCAGAAACAAAGTGACGTTGAAATCCTTCACTG  |                       |                       |                       |                       |                       |                       |                                             |
| Sulfolobus turreted icosahedral virus NC_005892 | (17664) | -----                                                                             |                       |                       |                       |                       |                       |                       |                                             |
|                                                 |         | Section 285                                                                       |                       |                       |                       |                       |                       |                       |                                             |
|                                                 | (22721) | <a href="#">22721</a>                                                             | <a href="#">22730</a> | <a href="#">22740</a> | <a href="#">22750</a> | <a href="#">22760</a> | <a href="#">22770</a> | <a href="#">22780</a> | <a href="#">22790</a> <a href="#">22800</a> |
| SARS-CoV-2 Reference Genome NC_045512.2         | (22485) | TAGAAAAAGGAATCTATCAAACCTCTAACTTTAGAGTCCAACCAACAGAATCTATTGTTAGATTTCTAATATTACAAAC   |                       |                       |                       |                       |                       |                       |                                             |
| Sulfolobus turreted icosahedral virus NC_005892 | (17664) | -----                                                                             |                       |                       |                       |                       |                       |                       |                                             |
|                                                 |         | Section 286                                                                       |                       |                       |                       |                       |                       |                       |                                             |
|                                                 | (22801) | <a href="#">22801</a>                                                             | <a href="#">22810</a> | <a href="#">22820</a> | <a href="#">22830</a> | <a href="#">22840</a> | <a href="#">22850</a> | <a href="#">22860</a> | <a href="#">22870</a> <a href="#">22880</a> |
| SARS-CoV-2 Reference Genome NC_045512.2         | (22565) | TTGTGCCCTTTTGGTGAAGTTTTTAAACGCCACCAGATTTGCATCTGTTTATGCTTGGAACAGGAAGAGAATCAGCAACTG |                       |                       |                       |                       |                       |                       |                                             |
| Sulfolobus turreted icosahedral virus NC_005892 | (17664) | -----                                                                             |                       |                       |                       |                       |                       |                       |                                             |
|                                                 |         | Section 287                                                                       |                       |                       |                       |                       |                       |                       |                                             |
|                                                 | (22881) | <a href="#">22881</a>                                                             | <a href="#">22890</a> | <a href="#">22900</a> | <a href="#">22910</a> | <a href="#">22920</a> | <a href="#">22930</a> | <a href="#">22940</a> | <a href="#">22950</a> <a href="#">22960</a> |
| SARS-CoV-2 Reference Genome NC_045512.2         | (22645) | TGTTGCTGATTATTCTGTCCTATATAATTCCGCATCATTTTCCACTTTTAAGTGTTATGGAGTGCTCCTACTAAATTAA   |                       |                       |                       |                       |                       |                       |                                             |
| Sulfolobus turreted icosahedral virus NC_005892 | (17664) | -----                                                                             |                       |                       |                       |                       |                       |                       |                                             |

SARS-CoV-2 & Sulfolobus turreted icosahedral virus.apr

|                                                 |         |                                                                                   |                       |                       |                       |                       |                       |                       |                                             |
|-------------------------------------------------|---------|-----------------------------------------------------------------------------------|-----------------------|-----------------------|-----------------------|-----------------------|-----------------------|-----------------------|---------------------------------------------|
|                                                 |         | Section 288                                                                       |                       |                       |                       |                       |                       |                       |                                             |
|                                                 | (22961) | <a href="#">22961</a>                                                             | <a href="#">22970</a> | <a href="#">22980</a> | <a href="#">22990</a> | <a href="#">23000</a> | <a href="#">23010</a> | <a href="#">23020</a> | <a href="#">23030</a> <a href="#">23040</a> |
| SARS-CoV-2 Reference Genome NC_045512.2         | (22725) | ATGATCTCTGCTTTACTAATGTCTATGCAGATTCATTTGTAATTAGAGGTGATGAAGTCAGACAAATCGCTCCAGGGCAA  |                       |                       |                       |                       |                       |                       |                                             |
| Sulfolobus turreted icosahedral virus NC_005892 | (17664) | -----                                                                             |                       |                       |                       |                       |                       |                       |                                             |
|                                                 |         | Section 289                                                                       |                       |                       |                       |                       |                       |                       |                                             |
|                                                 | (23041) | <a href="#">23041</a>                                                             | <a href="#">23050</a> | <a href="#">23060</a> | <a href="#">23070</a> | <a href="#">23080</a> | <a href="#">23090</a> | <a href="#">23100</a> | <a href="#">23110</a> <a href="#">23120</a> |
| SARS-CoV-2 Reference Genome NC_045512.2         | (22805) | ACTGGAAAGATTGCTGATTATAATTATAAATTACCAGATGATTTTACAGGCTGCGTTATAGCTTGGAATTCTAACAATCT  |                       |                       |                       |                       |                       |                       |                                             |
| Sulfolobus turreted icosahedral virus NC_005892 | (17664) | -----                                                                             |                       |                       |                       |                       |                       |                       |                                             |
|                                                 |         | Section 290                                                                       |                       |                       |                       |                       |                       |                       |                                             |
|                                                 | (23121) | <a href="#">23121</a>                                                             | <a href="#">23130</a> | <a href="#">23140</a> | <a href="#">23150</a> | <a href="#">23160</a> | <a href="#">23170</a> | <a href="#">23180</a> | <a href="#">23190</a> <a href="#">23200</a> |
| SARS-CoV-2 Reference Genome NC_045512.2         | (22885) | TGATTCTAAGGTTGGTGGTAATTATAATTACCTGTATAGATTGTTTAGGAAGTCTAATCTCAAACCTTTTGAGAGAGATA  |                       |                       |                       |                       |                       |                       |                                             |
| Sulfolobus turreted icosahedral virus NC_005892 | (17664) | -----                                                                             |                       |                       |                       |                       |                       |                       |                                             |
|                                                 |         | Section 291                                                                       |                       |                       |                       |                       |                       |                       |                                             |
|                                                 | (23201) | <a href="#">23201</a>                                                             | <a href="#">23210</a> | <a href="#">23220</a> | <a href="#">23230</a> | <a href="#">23240</a> | <a href="#">23250</a> | <a href="#">23260</a> | <a href="#">23270</a> <a href="#">23280</a> |
| SARS-CoV-2 Reference Genome NC_045512.2         | (22965) | TTTCAACTGAAATCTATCAGGCCGGTAGCACACCTTGTAATGGTGTTGAAGGTTTAAATTGTTACTTTCTTTTACAATCA  |                       |                       |                       |                       |                       |                       |                                             |
| Sulfolobus turreted icosahedral virus NC_005892 | (17664) | -----                                                                             |                       |                       |                       |                       |                       |                       |                                             |
|                                                 |         | Section 292                                                                       |                       |                       |                       |                       |                       |                       |                                             |
|                                                 | (23281) | <a href="#">23281</a>                                                             | <a href="#">23290</a> | <a href="#">23300</a> | <a href="#">23310</a> | <a href="#">23320</a> | <a href="#">23330</a> | <a href="#">23340</a> | <a href="#">23350</a> <a href="#">23360</a> |
| SARS-CoV-2 Reference Genome NC_045512.2         | (23045) | TATGGTTTCCAACCCACTAATGGTGTGGTTACCAACCATACAGAGTAGTAGTACTTTCTTTTGAAGTTCTACATGCACC   |                       |                       |                       |                       |                       |                       |                                             |
| Sulfolobus turreted icosahedral virus NC_005892 | (17664) | -----                                                                             |                       |                       |                       |                       |                       |                       |                                             |
|                                                 |         | Section 293                                                                       |                       |                       |                       |                       |                       |                       |                                             |
|                                                 | (23361) | <a href="#">23361</a>                                                             | <a href="#">23370</a> | <a href="#">23380</a> | <a href="#">23390</a> | <a href="#">23400</a> | <a href="#">23410</a> | <a href="#">23420</a> | <a href="#">23430</a> <a href="#">23440</a> |
| SARS-CoV-2 Reference Genome NC_045512.2         | (23125) | AGCAACTGTTTGTGGACCTAAAAAGTCTACTAATTTGGTTAAAAACAAATGTGTCAATTTCAACTTCAATGGTTTAAACAG |                       |                       |                       |                       |                       |                       |                                             |
| Sulfolobus turreted icosahedral virus NC_005892 | (17664) | -----                                                                             |                       |                       |                       |                       |                       |                       |                                             |
|                                                 |         | Section 294                                                                       |                       |                       |                       |                       |                       |                       |                                             |
|                                                 | (23441) | <a href="#">23441</a>                                                             | <a href="#">23450</a> | <a href="#">23460</a> | <a href="#">23470</a> | <a href="#">23480</a> | <a href="#">23490</a> | <a href="#">23500</a> | <a href="#">23510</a> <a href="#">23520</a> |
| SARS-CoV-2 Reference Genome NC_045512.2         | (23205) | GCACAGGTGTTCTTACTGAGTCTAACAAAAAGTTTCTGCCTTTCCAACAATTTGGCAGAGACATTGCTGACACTACTGAT  |                       |                       |                       |                       |                       |                       |                                             |
| Sulfolobus turreted icosahedral virus NC_005892 | (17664) | -----                                                                             |                       |                       |                       |                       |                       |                       |                                             |

SARS-CoV-2 & Sulfolobus turreted icosahedral virus.apr

|                                                 |         |                                                                                   |                       |                       |                       |                       |                       |                       |                                             |
|-------------------------------------------------|---------|-----------------------------------------------------------------------------------|-----------------------|-----------------------|-----------------------|-----------------------|-----------------------|-----------------------|---------------------------------------------|
|                                                 |         | Section 295                                                                       |                       |                       |                       |                       |                       |                       |                                             |
|                                                 | (23521) | <a href="#">23521</a>                                                             | <a href="#">23530</a> | <a href="#">23540</a> | <a href="#">23550</a> | <a href="#">23560</a> | <a href="#">23570</a> | <a href="#">23580</a> | <a href="#">23590</a> <a href="#">23600</a> |
| SARS-CoV-2 Reference Genome NC_045512.2         | (23285) | GCTGTCCGTGATCCACAGACACTTGAGATTCTTGACATTACACCATGTTCTTTTGGTGGTGTTCAGTGTTATAACACCAGG |                       |                       |                       |                       |                       |                       |                                             |
| Sulfolobus turreted icosahedral virus NC_005892 | (17664) | -----                                                                             |                       |                       |                       |                       |                       |                       |                                             |
|                                                 |         | Section 296                                                                       |                       |                       |                       |                       |                       |                       |                                             |
|                                                 | (23601) | <a href="#">23601</a>                                                             | <a href="#">23610</a> | <a href="#">23620</a> | <a href="#">23630</a> | <a href="#">23640</a> | <a href="#">23650</a> | <a href="#">23660</a> | <a href="#">23670</a> <a href="#">23680</a> |
| SARS-CoV-2 Reference Genome NC_045512.2         | (23365) | AACAAATACTTCTAACCAGGTTGCTGTTCTTTATCAGGATGTTAACTGCACAGAAGTCCCTGTTGCTATTTCATGCAGATC |                       |                       |                       |                       |                       |                       |                                             |
| Sulfolobus turreted icosahedral virus NC_005892 | (17664) | -----                                                                             |                       |                       |                       |                       |                       |                       |                                             |
|                                                 |         | Section 297                                                                       |                       |                       |                       |                       |                       |                       |                                             |
|                                                 | (23681) | <a href="#">23681</a>                                                             | <a href="#">23690</a> | <a href="#">23700</a> | <a href="#">23710</a> | <a href="#">23720</a> | <a href="#">23730</a> | <a href="#">23740</a> | <a href="#">23750</a> <a href="#">23760</a> |
| SARS-CoV-2 Reference Genome NC_045512.2         | (23445) | AACTTACTCCTACTTGGCGTGTTTATTCTACAGGTTCTAATGTTTTTCAAACACGTGCAGGCTGTTTAATAGGGGCTGAA  |                       |                       |                       |                       |                       |                       |                                             |
| Sulfolobus turreted icosahedral virus NC_005892 | (17664) | -----                                                                             |                       |                       |                       |                       |                       |                       |                                             |
|                                                 |         | Section 298                                                                       |                       |                       |                       |                       |                       |                       |                                             |
|                                                 | (23761) | <a href="#">23761</a>                                                             | <a href="#">23770</a> | <a href="#">23780</a> | <a href="#">23790</a> | <a href="#">23800</a> | <a href="#">23810</a> | <a href="#">23820</a> | <a href="#">23830</a> <a href="#">23840</a> |
| SARS-CoV-2 Reference Genome NC_045512.2         | (23525) | CATGTCAACAACATCATATGAGTGTGACATACCCATTGGTGCAGGTATATGCGCTAGTTATCAGACTCAGACTAATTCTCC |                       |                       |                       |                       |                       |                       |                                             |
| Sulfolobus turreted icosahedral virus NC_005892 | (17664) | -----                                                                             |                       |                       |                       |                       |                       |                       |                                             |
|                                                 |         | Section 299                                                                       |                       |                       |                       |                       |                       |                       |                                             |
|                                                 | (23841) | <a href="#">23841</a>                                                             | <a href="#">23850</a> | <a href="#">23860</a> | <a href="#">23870</a> | <a href="#">23880</a> | <a href="#">23890</a> | <a href="#">23900</a> | <a href="#">23910</a> <a href="#">23920</a> |
| SARS-CoV-2 Reference Genome NC_045512.2         | (23605) | TCGGCGGGCAGTAGTGTAGCTAGTCAATCCATCATTGCCTACACTATGTCACTTGGTGCAGAAAATTTCAGTTGCTTACT  |                       |                       |                       |                       |                       |                       |                                             |
| Sulfolobus turreted icosahedral virus NC_005892 | (17664) | -----                                                                             |                       |                       |                       |                       |                       |                       |                                             |
|                                                 |         | Section 300                                                                       |                       |                       |                       |                       |                       |                       |                                             |
|                                                 | (23921) | <a href="#">23921</a>                                                             | <a href="#">23930</a> | <a href="#">23940</a> | <a href="#">23950</a> | <a href="#">23960</a> | <a href="#">23970</a> | <a href="#">23980</a> | <a href="#">23990</a> <a href="#">24000</a> |
| SARS-CoV-2 Reference Genome NC_045512.2         | (23685) | CTAATAACTCTATTGCCATACCCACAAATTTTACTATTAGTGTACCACAGAAATTCACCAGTGTCTATGACCAAGACA    |                       |                       |                       |                       |                       |                       |                                             |
| Sulfolobus turreted icosahedral virus NC_005892 | (17664) | -----                                                                             |                       |                       |                       |                       |                       |                       |                                             |
|                                                 |         | Section 301                                                                       |                       |                       |                       |                       |                       |                       |                                             |
|                                                 | (24001) | <a href="#">24001</a>                                                             | <a href="#">24010</a> | <a href="#">24020</a> | <a href="#">24030</a> | <a href="#">24040</a> | <a href="#">24050</a> | <a href="#">24060</a> | <a href="#">24070</a> <a href="#">24080</a> |
| SARS-CoV-2 Reference Genome NC_045512.2         | (23765) | TCAGTAGATTGTACAATGTACATTTGTGGTGATTCAACTGAATGCAGCAATCTTTTGTGCAATATGGCAGTTTTTGTAC   |                       |                       |                       |                       |                       |                       |                                             |
| Sulfolobus turreted icosahedral virus NC_005892 | (17664) | -----                                                                             |                       |                       |                       |                       |                       |                       |                                             |

SARS-CoV-2 & Sulfolobus turreted icosahedral virus.apr

|                                                         |                                                                                   |                       |                       |                       |                       |                       |                       |                       |                       |
|---------------------------------------------------------|-----------------------------------------------------------------------------------|-----------------------|-----------------------|-----------------------|-----------------------|-----------------------|-----------------------|-----------------------|-----------------------|
| Section 302                                             |                                                                                   |                       |                       |                       |                       |                       |                       |                       |                       |
| (24081)                                                 | <a href="#">24081</a>                                                             | <a href="#">24090</a> | <a href="#">24100</a> | <a href="#">24110</a> | <a href="#">24120</a> | <a href="#">24130</a> | <a href="#">24140</a> | <a href="#">24150</a> | <a href="#">24160</a> |
| SARS-CoV-2 Reference Genome NC_045512.2 (23845)         | ACAATTAAACCGTGCTTTAACTGGAATAGCTGTTGAACAAGACAAAAACACCCAAGAAGTTTTTGCACAAGTCAAACAAA  |                       |                       |                       |                       |                       |                       |                       |                       |
| Sulfolobus turreted icosahedral virus NC_005892 (17664) | -----                                                                             |                       |                       |                       |                       |                       |                       |                       |                       |
| Section 303                                             |                                                                                   |                       |                       |                       |                       |                       |                       |                       |                       |
| (24161)                                                 | <a href="#">24161</a>                                                             | <a href="#">24170</a> | <a href="#">24180</a> | <a href="#">24190</a> | <a href="#">24200</a> | <a href="#">24210</a> | <a href="#">24220</a> | <a href="#">24230</a> | <a href="#">24240</a> |
| SARS-CoV-2 Reference Genome NC_045512.2 (23925)         | TTTACAAAACACCACCAATTAAAGATTTTGGTGGTTTTAATTTTTCACAAATATTACCAGATCCATCAAAACCAAGCAAG  |                       |                       |                       |                       |                       |                       |                       |                       |
| Sulfolobus turreted icosahedral virus NC_005892 (17664) | -----                                                                             |                       |                       |                       |                       |                       |                       |                       |                       |
| Section 304                                             |                                                                                   |                       |                       |                       |                       |                       |                       |                       |                       |
| (24241)                                                 | <a href="#">24241</a>                                                             | <a href="#">24250</a> | <a href="#">24260</a> | <a href="#">24270</a> | <a href="#">24280</a> | <a href="#">24290</a> | <a href="#">24300</a> | <a href="#">24310</a> | <a href="#">24320</a> |
| SARS-CoV-2 Reference Genome NC_045512.2 (24005)         | AGGTCATTTATTGAAGATCTACTTTTCAACAAAGTGACACTTGCAGATGCTGGCTTCATCAAAACAATATGGTGATTGCCT |                       |                       |                       |                       |                       |                       |                       |                       |
| Sulfolobus turreted icosahedral virus NC_005892 (17664) | -----                                                                             |                       |                       |                       |                       |                       |                       |                       |                       |
| Section 305                                             |                                                                                   |                       |                       |                       |                       |                       |                       |                       |                       |
| (24321)                                                 | <a href="#">24321</a>                                                             | <a href="#">24330</a> | <a href="#">24340</a> | <a href="#">24350</a> | <a href="#">24360</a> | <a href="#">24370</a> | <a href="#">24380</a> | <a href="#">24390</a> | <a href="#">24400</a> |
| SARS-CoV-2 Reference Genome NC_045512.2 (24085)         | TGGTGATATTGCTGCTAGAGACCTCATTTGTGCACAAAAGTTTAACGGCCTTACTGTTTTGCCACCTTTGCTCACAGATG  |                       |                       |                       |                       |                       |                       |                       |                       |
| Sulfolobus turreted icosahedral virus NC_005892 (17664) | -----                                                                             |                       |                       |                       |                       |                       |                       |                       |                       |
| Section 306                                             |                                                                                   |                       |                       |                       |                       |                       |                       |                       |                       |
| (24401)                                                 | <a href="#">24401</a>                                                             | <a href="#">24410</a> | <a href="#">24420</a> | <a href="#">24430</a> | <a href="#">24440</a> | <a href="#">24450</a> | <a href="#">24460</a> | <a href="#">24470</a> | <a href="#">24480</a> |
| SARS-CoV-2 Reference Genome NC_045512.2 (24165)         | AAATGATTGCTCAATACACTTCTGCACTGTTAGCGGGTACAATCACTTCTGGTTGGACCTTTGGTGCAGGTGCTGCATTA  |                       |                       |                       |                       |                       |                       |                       |                       |
| Sulfolobus turreted icosahedral virus NC_005892 (17664) | -----                                                                             |                       |                       |                       |                       |                       |                       |                       |                       |
| Section 307                                             |                                                                                   |                       |                       |                       |                       |                       |                       |                       |                       |
| (24481)                                                 | <a href="#">24481</a>                                                             | <a href="#">24490</a> | <a href="#">24500</a> | <a href="#">24510</a> | <a href="#">24520</a> | <a href="#">24530</a> | <a href="#">24540</a> | <a href="#">24550</a> | <a href="#">24560</a> |
| SARS-CoV-2 Reference Genome NC_045512.2 (24245)         | CAAATACCATTGCTATGCAAAATGGCTTATAGGTTTAATGGTATTGGAGTTACACAGAATGTTCTCTATGAGAACCAAAA  |                       |                       |                       |                       |                       |                       |                       |                       |
| Sulfolobus turreted icosahedral virus NC_005892 (17664) | -----                                                                             |                       |                       |                       |                       |                       |                       |                       |                       |
| Section 308                                             |                                                                                   |                       |                       |                       |                       |                       |                       |                       |                       |
| (24561)                                                 | <a href="#">24561</a>                                                             | <a href="#">24570</a> | <a href="#">24580</a> | <a href="#">24590</a> | <a href="#">24600</a> | <a href="#">24610</a> | <a href="#">24620</a> | <a href="#">24630</a> | <a href="#">24640</a> |
| SARS-CoV-2 Reference Genome NC_045512.2 (24325)         | ATTGATTGCCAACCAATTTAATAGTGCTATTGGCAAAATTCAAGACTCACTTCTTCCACAGCAAGTGCACTTGGAAAAC   |                       |                       |                       |                       |                       |                       |                       |                       |
| Sulfolobus turreted icosahedral virus NC_005892 (17664) | -----                                                                             |                       |                       |                       |                       |                       |                       |                       |                       |

## SARS-CoV-2 &amp; Sulfolobus turreted icosahedral virus.apr

|                                                 |         |                                                                                   |                       |                       |                       |                       |                       |                       |                       |                       |
|-------------------------------------------------|---------|-----------------------------------------------------------------------------------|-----------------------|-----------------------|-----------------------|-----------------------|-----------------------|-----------------------|-----------------------|-----------------------|
| Section 309                                     |         |                                                                                   |                       |                       |                       |                       |                       |                       |                       |                       |
|                                                 | (24641) | <a href="#">24641</a>                                                             | <a href="#">24650</a> | <a href="#">24660</a> | <a href="#">24670</a> | <a href="#">24680</a> | <a href="#">24690</a> | <a href="#">24700</a> | <a href="#">24710</a> | <a href="#">24720</a> |
| SARS-CoV-2 Reference Genome NC_045512.2         | (24405) | TTCAAGATGTGGTCAACCAAAATGCACAAGCTTTAAACACGCTTGTTAAACAACCTTAGCTCCAATTTTGGTGCAATTTCA |                       |                       |                       |                       |                       |                       |                       |                       |
| Sulfolobus turreted icosahedral virus NC_005892 | (17664) | -----                                                                             |                       |                       |                       |                       |                       |                       |                       |                       |
| Section 310                                     |         |                                                                                   |                       |                       |                       |                       |                       |                       |                       |                       |
|                                                 | (24721) | <a href="#">24721</a>                                                             | <a href="#">24730</a> | <a href="#">24740</a> | <a href="#">24750</a> | <a href="#">24760</a> | <a href="#">24770</a> | <a href="#">24780</a> | <a href="#">24790</a> | <a href="#">24800</a> |
| SARS-CoV-2 Reference Genome NC_045512.2         | (24485) | AGTGTTTTAAATGATATCCTTTACGCTCTTGACAAAGTTGAGGCTGAAGTGCAAATTGATAGGTTGATCACAGGCAGACT  |                       |                       |                       |                       |                       |                       |                       |                       |
| Sulfolobus turreted icosahedral virus NC_005892 | (17664) | -----                                                                             |                       |                       |                       |                       |                       |                       |                       |                       |
| Section 311                                     |         |                                                                                   |                       |                       |                       |                       |                       |                       |                       |                       |
|                                                 | (24801) | <a href="#">24801</a>                                                             | <a href="#">24810</a> | <a href="#">24820</a> | <a href="#">24830</a> | <a href="#">24840</a> | <a href="#">24850</a> | <a href="#">24860</a> | <a href="#">24870</a> | <a href="#">24880</a> |
| SARS-CoV-2 Reference Genome NC_045512.2         | (24565) | TCAAAGTTTGCAGACATATGTGACTCAACAATTAATTAGAGCTGCAGAAATCAGAGCTTCTGCTAATCTTGCTGCTACTA  |                       |                       |                       |                       |                       |                       |                       |                       |
| Sulfolobus turreted icosahedral virus NC_005892 | (17664) | -----                                                                             |                       |                       |                       |                       |                       |                       |                       |                       |
| Section 312                                     |         |                                                                                   |                       |                       |                       |                       |                       |                       |                       |                       |
|                                                 | (24881) | <a href="#">24881</a>                                                             | <a href="#">24890</a> | <a href="#">24900</a> | <a href="#">24910</a> | <a href="#">24920</a> | <a href="#">24930</a> | <a href="#">24940</a> | <a href="#">24950</a> | <a href="#">24960</a> |
| SARS-CoV-2 Reference Genome NC_045512.2         | (24645) | AAATGTCAGAGTGTGTACTTGGACAATCAAAAAGAGTTGATTTTTGTGGAAAGGGCTATCATCTTATGTCCTTCCCTCAG  |                       |                       |                       |                       |                       |                       |                       |                       |
| Sulfolobus turreted icosahedral virus NC_005892 | (17664) | -----                                                                             |                       |                       |                       |                       |                       |                       |                       |                       |
| Section 313                                     |         |                                                                                   |                       |                       |                       |                       |                       |                       |                       |                       |
|                                                 | (24961) | <a href="#">24961</a>                                                             | <a href="#">24970</a> | <a href="#">24980</a> | <a href="#">24990</a> | <a href="#">25000</a> | <a href="#">25010</a> | <a href="#">25020</a> | <a href="#">25030</a> | <a href="#">25040</a> |
| SARS-CoV-2 Reference Genome NC_045512.2         | (24725) | TCAGCACCTCATGGTGTAGTCTTCTTGCATGTGACTTATGTCCCTGCACAAGAAAAGAACTTCACAACCTGCTCCTGCCAT |                       |                       |                       |                       |                       |                       |                       |                       |
| Sulfolobus turreted icosahedral virus NC_005892 | (17664) | -----                                                                             |                       |                       |                       |                       |                       |                       |                       |                       |
| Section 314                                     |         |                                                                                   |                       |                       |                       |                       |                       |                       |                       |                       |
|                                                 | (25041) | <a href="#">25041</a>                                                             | <a href="#">25050</a> | <a href="#">25060</a> | <a href="#">25070</a> | <a href="#">25080</a> | <a href="#">25090</a> | <a href="#">25100</a> | <a href="#">25110</a> | <a href="#">25120</a> |
| SARS-CoV-2 Reference Genome NC_045512.2         | (24805) | TTGTCATGATGGAAAAGCACACTTTCCTCGTGAAGGTGTCTTTGTTTCAAATGGCACACACTGGTTTGTAACACAAAGGA  |                       |                       |                       |                       |                       |                       |                       |                       |
| Sulfolobus turreted icosahedral virus NC_005892 | (17664) | -----                                                                             |                       |                       |                       |                       |                       |                       |                       |                       |
| Section 315                                     |         |                                                                                   |                       |                       |                       |                       |                       |                       |                       |                       |
|                                                 | (25121) | <a href="#">25121</a>                                                             | <a href="#">25130</a> | <a href="#">25140</a> | <a href="#">25150</a> | <a href="#">25160</a> | <a href="#">25170</a> | <a href="#">25180</a> | <a href="#">25190</a> | <a href="#">25200</a> |
| SARS-CoV-2 Reference Genome NC_045512.2         | (24885) | ATTTTTATGAACCACAAATCATTACTACAGACAACACATTTGTGTCTGGTAACTGTGATGTTGTAATAGGAATTGTCAAC  |                       |                       |                       |                       |                       |                       |                       |                       |
| Sulfolobus turreted icosahedral virus NC_005892 | (17664) | -----                                                                             |                       |                       |                       |                       |                       |                       |                       |                       |

SARS-CoV-2 & Sulfolobus turreted icosahedral virus.apr

|                                                 |         |                                                                                    |                       |                       |                       |                       |                       |                       |                                             |
|-------------------------------------------------|---------|------------------------------------------------------------------------------------|-----------------------|-----------------------|-----------------------|-----------------------|-----------------------|-----------------------|---------------------------------------------|
|                                                 |         | Section 316                                                                        |                       |                       |                       |                       |                       |                       |                                             |
|                                                 | (25201) | <a href="#">25201</a>                                                              | <a href="#">25210</a> | <a href="#">25220</a> | <a href="#">25230</a> | <a href="#">25240</a> | <a href="#">25250</a> | <a href="#">25260</a> | <a href="#">25270</a> <a href="#">25280</a> |
| SARS-CoV-2 Reference Genome NC_045512.2         | (24965) | AACACAGTTTATGATCCTTTGCAACCTGAATTAGACTCATTCAAGGAGGAGTTAGATAAAATATTTTAAGAATCATACATC  |                       |                       |                       |                       |                       |                       |                                             |
| Sulfolobus turreted icosahedral virus NC_005892 | (17664) | -----                                                                              |                       |                       |                       |                       |                       |                       |                                             |
|                                                 |         | Section 317                                                                        |                       |                       |                       |                       |                       |                       |                                             |
|                                                 | (25281) | <a href="#">25281</a>                                                              | <a href="#">25290</a> | <a href="#">25300</a> | <a href="#">25310</a> | <a href="#">25320</a> | <a href="#">25330</a> | <a href="#">25340</a> | <a href="#">25350</a> <a href="#">25360</a> |
| SARS-CoV-2 Reference Genome NC_045512.2         | (25045) | ACCAGATGTTGATTTAGGTGACATCTCTGGCATTAAATGCTTCAGTTGTAAACATTCAAAAAGAAATTGACCGCCTCAATG  |                       |                       |                       |                       |                       |                       |                                             |
| Sulfolobus turreted icosahedral virus NC_005892 | (17664) | -----                                                                              |                       |                       |                       |                       |                       |                       |                                             |
|                                                 |         | Section 318                                                                        |                       |                       |                       |                       |                       |                       |                                             |
|                                                 | (25361) | <a href="#">25361</a>                                                              | <a href="#">25370</a> | <a href="#">25380</a> | <a href="#">25390</a> | <a href="#">25400</a> | <a href="#">25410</a> | <a href="#">25420</a> | <a href="#">25430</a> <a href="#">25440</a> |
| SARS-CoV-2 Reference Genome NC_045512.2         | (25125) | AGGTTGCCAAGAATTTAAATGAATCTCTCATCGATCTCCAAGAACTTGGAAGTATGAGCAGTATATAAAATGGCCATGG    |                       |                       |                       |                       |                       |                       |                                             |
| Sulfolobus turreted icosahedral virus NC_005892 | (17664) | -----                                                                              |                       |                       |                       |                       |                       |                       |                                             |
|                                                 |         | Section 319                                                                        |                       |                       |                       |                       |                       |                       |                                             |
|                                                 | (25441) | <a href="#">25441</a>                                                              | <a href="#">25450</a> | <a href="#">25460</a> | <a href="#">25470</a> | <a href="#">25480</a> | <a href="#">25490</a> | <a href="#">25500</a> | <a href="#">25510</a> <a href="#">25520</a> |
| SARS-CoV-2 Reference Genome NC_045512.2         | (25205) | TACATTTGGCTAGGTTTTATAGCTGGCTTGATTGCCATAGTAATGGTGACAATTATGCTTTGCTGTATGACCAGTTGCTG   |                       |                       |                       |                       |                       |                       |                                             |
| Sulfolobus turreted icosahedral virus NC_005892 | (17664) | -----                                                                              |                       |                       |                       |                       |                       |                       |                                             |
|                                                 |         | Section 320                                                                        |                       |                       |                       |                       |                       |                       |                                             |
|                                                 | (25521) | <a href="#">25521</a>                                                              | <a href="#">25530</a> | <a href="#">25540</a> | <a href="#">25550</a> | <a href="#">25560</a> | <a href="#">25570</a> | <a href="#">25580</a> | <a href="#">25590</a> <a href="#">25600</a> |
| SARS-CoV-2 Reference Genome NC_045512.2         | (25285) | TAGTTGTCTCAAGGGCTGTTGTTCTTGTGGATCCTGCTGCAAATTTGATGAAGACGACTCTGAGCCAGTGCTCAAAGGAG   |                       |                       |                       |                       |                       |                       |                                             |
| Sulfolobus turreted icosahedral virus NC_005892 | (17664) | -----                                                                              |                       |                       |                       |                       |                       |                       |                                             |
|                                                 |         | Section 321                                                                        |                       |                       |                       |                       |                       |                       |                                             |
|                                                 | (25601) | <a href="#">25601</a>                                                              | <a href="#">25610</a> | <a href="#">25620</a> | <a href="#">25630</a> | <a href="#">25640</a> | <a href="#">25650</a> | <a href="#">25660</a> | <a href="#">25670</a> <a href="#">25680</a> |
| SARS-CoV-2 Reference Genome NC_045512.2         | (25365) | TCAAATTACATTACACATAAACGAACCTTATGGATTTGTTTATGAGAATCTTCACAATTGGAACGTAACTTTGAAGCAAG   |                       |                       |                       |                       |                       |                       |                                             |
| Sulfolobus turreted icosahedral virus NC_005892 | (17664) | -----                                                                              |                       |                       |                       |                       |                       |                       |                                             |
|                                                 |         | Section 322                                                                        |                       |                       |                       |                       |                       |                       |                                             |
|                                                 | (25681) | <a href="#">25681</a>                                                              | <a href="#">25690</a> | <a href="#">25700</a> | <a href="#">25710</a> | <a href="#">25720</a> | <a href="#">25730</a> | <a href="#">25740</a> | <a href="#">25750</a> <a href="#">25760</a> |
| SARS-CoV-2 Reference Genome NC_045512.2         | (25445) | GTGAAATCAAGGATGCTACTCCTTCAGATTTTGTTTCGCGCTACTGCAACGATACCGATACAAGCCTCACTCCCTTTTCGGA |                       |                       |                       |                       |                       |                       |                                             |
| Sulfolobus turreted icosahedral virus NC_005892 | (17664) | -----                                                                              |                       |                       |                       |                       |                       |                       |                                             |

SARS-CoV-2 & Sulfolobus turreted icosahedral virus.apr

|                                                 |         |                                                                                   |                       |                       |                       |                       |                       |                       |                                             |
|-------------------------------------------------|---------|-----------------------------------------------------------------------------------|-----------------------|-----------------------|-----------------------|-----------------------|-----------------------|-----------------------|---------------------------------------------|
|                                                 |         | Section 323                                                                       |                       |                       |                       |                       |                       |                       |                                             |
|                                                 | (25761) | <a href="#">25761</a>                                                             | <a href="#">25770</a> | <a href="#">25780</a> | <a href="#">25790</a> | <a href="#">25800</a> | <a href="#">25810</a> | <a href="#">25820</a> | <a href="#">25830</a> <a href="#">25840</a> |
| SARS-CoV-2 Reference Genome NC_045512.2         | (25525) | TGGCTTATTGTTGGCGTTGCACTTCTTGCTGTTTTTCAGAGCGCTTCCAAAATCATAACCCTCAAAAAGAGATGGCAACT  |                       |                       |                       |                       |                       |                       |                                             |
| Sulfolobus turreted icosahedral virus NC_005892 | (17664) | -----                                                                             |                       |                       |                       |                       |                       |                       |                                             |
|                                                 |         | Section 324                                                                       |                       |                       |                       |                       |                       |                       |                                             |
|                                                 | (25841) | <a href="#">25841</a>                                                             | <a href="#">25850</a> | <a href="#">25860</a> | <a href="#">25870</a> | <a href="#">25880</a> | <a href="#">25890</a> | <a href="#">25900</a> | <a href="#">25910</a> <a href="#">25920</a> |
| SARS-CoV-2 Reference Genome NC_045512.2         | (25605) | AGCACTCTCCAAGGGTGTTCACCTTTGTTTGCAACTTGCTGTTGTTGTTGTAAACAGTTTACTCACACCTTTTGCTCGTTG |                       |                       |                       |                       |                       |                       |                                             |
| Sulfolobus turreted icosahedral virus NC_005892 | (17664) | -----                                                                             |                       |                       |                       |                       |                       |                       |                                             |
|                                                 |         | Section 325                                                                       |                       |                       |                       |                       |                       |                       |                                             |
|                                                 | (25921) | <a href="#">25921</a>                                                             | <a href="#">25930</a> | <a href="#">25940</a> | <a href="#">25950</a> | <a href="#">25960</a> | <a href="#">25970</a> | <a href="#">25980</a> | <a href="#">25990</a> <a href="#">26000</a> |
| SARS-CoV-2 Reference Genome NC_045512.2         | (25685) | CTGCTGGCCTTGAAGCCCCTTTTCTCTATCTTTATGCTTTAGTCTACTTCTTGCAGAGTATAAACTTTGTAAGAATAATA  |                       |                       |                       |                       |                       |                       |                                             |
| Sulfolobus turreted icosahedral virus NC_005892 | (17664) | -----                                                                             |                       |                       |                       |                       |                       |                       |                                             |
|                                                 |         | Section 326                                                                       |                       |                       |                       |                       |                       |                       |                                             |
|                                                 | (26001) | <a href="#">26001</a>                                                             | <a href="#">26010</a> | <a href="#">26020</a> | <a href="#">26030</a> | <a href="#">26040</a> | <a href="#">26050</a> | <a href="#">26060</a> | <a href="#">26070</a> <a href="#">26080</a> |
| SARS-CoV-2 Reference Genome NC_045512.2         | (25765) | ATGAGGCTTTGGCTTTGCTGGAAATGCCGTTCCAAAACCCATTACTTTATGATGCCAACTATTTCTTTGCTGGCATACT   |                       |                       |                       |                       |                       |                       |                                             |
| Sulfolobus turreted icosahedral virus NC_005892 | (17664) | -----                                                                             |                       |                       |                       |                       |                       |                       |                                             |
|                                                 |         | Section 327                                                                       |                       |                       |                       |                       |                       |                       |                                             |
|                                                 | (26081) | <a href="#">26081</a>                                                             | <a href="#">26090</a> | <a href="#">26100</a> | <a href="#">26110</a> | <a href="#">26120</a> | <a href="#">26130</a> | <a href="#">26140</a> | <a href="#">26150</a> <a href="#">26160</a> |
| SARS-CoV-2 Reference Genome NC_045512.2         | (25845) | TAATTGTTACGACTATTGTATACCTTACAATAGTGTAACCTTCTCAATTGTCATTACTTCAGGTGATGGCACAACAAGTC  |                       |                       |                       |                       |                       |                       |                                             |
| Sulfolobus turreted icosahedral virus NC_005892 | (17664) | -----                                                                             |                       |                       |                       |                       |                       |                       |                                             |
|                                                 |         | Section 328                                                                       |                       |                       |                       |                       |                       |                       |                                             |
|                                                 | (26161) | <a href="#">26161</a>                                                             | <a href="#">26170</a> | <a href="#">26180</a> | <a href="#">26190</a> | <a href="#">26200</a> | <a href="#">26210</a> | <a href="#">26220</a> | <a href="#">26230</a> <a href="#">26240</a> |
| SARS-CoV-2 Reference Genome NC_045512.2         | (25925) | CTATTTCTGAACATGACTACCAGATTGGTGGTTATACTGAAAAATGGGAATCTGGAGTAAAAGACTGTGTTGTATTACAC  |                       |                       |                       |                       |                       |                       |                                             |
| Sulfolobus turreted icosahedral virus NC_005892 | (17664) | -----                                                                             |                       |                       |                       |                       |                       |                       |                                             |
|                                                 |         | Section 329                                                                       |                       |                       |                       |                       |                       |                       |                                             |
|                                                 | (26241) | <a href="#">26241</a>                                                             | <a href="#">26250</a> | <a href="#">26260</a> | <a href="#">26270</a> | <a href="#">26280</a> | <a href="#">26290</a> | <a href="#">26300</a> | <a href="#">26310</a> <a href="#">26320</a> |
| SARS-CoV-2 Reference Genome NC_045512.2         | (26005) | AGTTACTTCACTTCAGACTATTACCAGCTGTACTCAACTCAATTGAGTACAGACACTGGTGTGAACATGTTACCTTCTT   |                       |                       |                       |                       |                       |                       |                                             |
| Sulfolobus turreted icosahedral virus NC_005892 | (17664) | -----                                                                             |                       |                       |                       |                       |                       |                       |                                             |

SARS-CoV-2 & Sulfolobus turreted icosahedral virus.apr

|                                                 |         |                                                                                    |                       |                       |                       |                       |                       |                       |                                             |
|-------------------------------------------------|---------|------------------------------------------------------------------------------------|-----------------------|-----------------------|-----------------------|-----------------------|-----------------------|-----------------------|---------------------------------------------|
|                                                 |         | Section 330                                                                        |                       |                       |                       |                       |                       |                       |                                             |
|                                                 | (26321) | <a href="#">26321</a>                                                              | <a href="#">26330</a> | <a href="#">26340</a> | <a href="#">26350</a> | <a href="#">26360</a> | <a href="#">26370</a> | <a href="#">26380</a> | <a href="#">26390</a> <a href="#">26400</a> |
| SARS-CoV-2 Reference Genome NC_045512.2         | (26085) | CATCTACAATAAAATTGTTGATGAGCCTGAAGAACATGTCCAAATTCACACAATCGACGGTTCATCCGGAGTTGTTAATC   |                       |                       |                       |                       |                       |                       |                                             |
| Sulfolobus turreted icosahedral virus NC_005892 | (17664) | -----                                                                              |                       |                       |                       |                       |                       |                       |                                             |
|                                                 |         | Section 331                                                                        |                       |                       |                       |                       |                       |                       |                                             |
|                                                 | (26401) | <a href="#">26401</a>                                                              | <a href="#">26410</a> | <a href="#">26420</a> | <a href="#">26430</a> | <a href="#">26440</a> | <a href="#">26450</a> | <a href="#">26460</a> | <a href="#">26470</a> <a href="#">26480</a> |
| SARS-CoV-2 Reference Genome NC_045512.2         | (26165) | CAGTAATGGAACCAATTTATGATGAACCGACGACGACTACTAGCGTGCCTTTGTAAGCACAAGCTGATGAGTACGAACCTT  |                       |                       |                       |                       |                       |                       |                                             |
| Sulfolobus turreted icosahedral virus NC_005892 | (17664) | -----                                                                              |                       |                       |                       |                       |                       |                       |                                             |
|                                                 |         | Section 332                                                                        |                       |                       |                       |                       |                       |                       |                                             |
|                                                 | (26481) | <a href="#">26481</a>                                                              | <a href="#">26490</a> | <a href="#">26500</a> | <a href="#">26510</a> | <a href="#">26520</a> | <a href="#">26530</a> | <a href="#">26540</a> | <a href="#">26550</a> <a href="#">26560</a> |
| SARS-CoV-2 Reference Genome NC_045512.2         | (26245) | ATGTACTCATTTCGTTTCGGAAGAGACAGGTACGTTAATAGTTAATAGCGTACTTCTTTTTCTTGCTTTTCGTGGTATTCTT |                       |                       |                       |                       |                       |                       |                                             |
| Sulfolobus turreted icosahedral virus NC_005892 | (17664) | -----                                                                              |                       |                       |                       |                       |                       |                       |                                             |
|                                                 |         | Section 333                                                                        |                       |                       |                       |                       |                       |                       |                                             |
|                                                 | (26561) | <a href="#">26561</a>                                                              | <a href="#">26570</a> | <a href="#">26580</a> | <a href="#">26590</a> | <a href="#">26600</a> | <a href="#">26610</a> | <a href="#">26620</a> | <a href="#">26630</a> <a href="#">26640</a> |
| SARS-CoV-2 Reference Genome NC_045512.2         | (26325) | GCTAGTTTACACTAGCCATCCTTACTGCGCTTCGATTGTGTGCGTACTGCTGCAATATTGTTAACGTGAGTCTTGTAAGAAC |                       |                       |                       |                       |                       |                       |                                             |
| Sulfolobus turreted icosahedral virus NC_005892 | (17664) | -----                                                                              |                       |                       |                       |                       |                       |                       |                                             |
|                                                 |         | Section 334                                                                        |                       |                       |                       |                       |                       |                       |                                             |
|                                                 | (26641) | <a href="#">26641</a>                                                              | <a href="#">26650</a> | <a href="#">26660</a> | <a href="#">26670</a> | <a href="#">26680</a> | <a href="#">26690</a> | <a href="#">26700</a> | <a href="#">26710</a> <a href="#">26720</a> |
| SARS-CoV-2 Reference Genome NC_045512.2         | (26405) | CTTCTTTTTTACGTTTACTCTCGTGTTAAAAATCTGAATTCTTCTAGAGTTCCTGATCTTCTGGTCTAAACGAACATAAATA |                       |                       |                       |                       |                       |                       |                                             |
| Sulfolobus turreted icosahedral virus NC_005892 | (17664) | -----                                                                              |                       |                       |                       |                       |                       |                       |                                             |
|                                                 |         | Section 335                                                                        |                       |                       |                       |                       |                       |                       |                                             |
|                                                 | (26721) | <a href="#">26721</a>                                                              | <a href="#">26730</a> | <a href="#">26740</a> | <a href="#">26750</a> | <a href="#">26760</a> | <a href="#">26770</a> | <a href="#">26780</a> | <a href="#">26790</a> <a href="#">26800</a> |
| SARS-CoV-2 Reference Genome NC_045512.2         | (26485) | TTATATTAGTTTTTCTGTTTGGAACCTTAATTTTAGCCATGGCAGATTCCAACGGTACTATTACCGTTGAAGAGCTTAA    |                       |                       |                       |                       |                       |                       |                                             |
| Sulfolobus turreted icosahedral virus NC_005892 | (17664) | -----                                                                              |                       |                       |                       |                       |                       |                       |                                             |
|                                                 |         | Section 336                                                                        |                       |                       |                       |                       |                       |                       |                                             |
|                                                 | (26801) | <a href="#">26801</a>                                                              | <a href="#">26810</a> | <a href="#">26820</a> | <a href="#">26830</a> | <a href="#">26840</a> | <a href="#">26850</a> | <a href="#">26860</a> | <a href="#">26870</a> <a href="#">26880</a> |
| SARS-CoV-2 Reference Genome NC_045512.2         | (26565) | AAGCTCCTTGAACAATGGAACCTAGTAATAGGTTTCCTATTCTTACATGGATTTGTCTTCTACAATTTGCCTATGCCAA    |                       |                       |                       |                       |                       |                       |                                             |
| Sulfolobus turreted icosahedral virus NC_005892 | (17664) | -----                                                                              |                       |                       |                       |                       |                       |                       |                                             |



SARS-CoV-2 & Sulfolobus turreted icosahedral virus.apr

|                                                 |         |                                                                                     |                       |                       |                       |                       |                       |                       |                                             |
|-------------------------------------------------|---------|-------------------------------------------------------------------------------------|-----------------------|-----------------------|-----------------------|-----------------------|-----------------------|-----------------------|---------------------------------------------|
|                                                 |         | Section 337                                                                         |                       |                       |                       |                       |                       |                       |                                             |
|                                                 | (26881) | <a href="#">26881</a>                                                               | <a href="#">26890</a> | <a href="#">26900</a> | <a href="#">26910</a> | <a href="#">26920</a> | <a href="#">26930</a> | <a href="#">26940</a> | <a href="#">26950</a> <a href="#">26960</a> |
| SARS-CoV-2 Reference Genome NC_045512.2         | (26645) | CAGGAATAGGTTTTTGTATATAATTAAGTTAATTTTCTCTGGCTGTTATGGCCAGTAACTTTAGCTTGTTTTGTGCTTG     |                       |                       |                       |                       |                       |                       |                                             |
| Sulfolobus turreted icosahedral virus NC_005892 | (17664) | -----                                                                               |                       |                       |                       |                       |                       |                       |                                             |
|                                                 |         | Section 338                                                                         |                       |                       |                       |                       |                       |                       |                                             |
|                                                 | (26961) | <a href="#">26961</a>                                                               | <a href="#">26970</a> | <a href="#">26980</a> | <a href="#">26990</a> | <a href="#">27000</a> | <a href="#">27010</a> | <a href="#">27020</a> | <a href="#">27030</a> <a href="#">27040</a> |
| SARS-CoV-2 Reference Genome NC_045512.2         | (26725) | CTGCTGTTTACAGAATAAATTGGATCACCGGTGGAATTGCTATCGCAATGGCTTGCTTGTAGGCTTGATGTGGCTCAGC     |                       |                       |                       |                       |                       |                       |                                             |
| Sulfolobus turreted icosahedral virus NC_005892 | (17664) | -----                                                                               |                       |                       |                       |                       |                       |                       |                                             |
|                                                 |         | Section 339                                                                         |                       |                       |                       |                       |                       |                       |                                             |
|                                                 | (27041) | <a href="#">27041</a>                                                               | <a href="#">27050</a> | <a href="#">27060</a> | <a href="#">27070</a> | <a href="#">27080</a> | <a href="#">27090</a> | <a href="#">27100</a> | <a href="#">27110</a> <a href="#">27120</a> |
| SARS-CoV-2 Reference Genome NC_045512.2         | (26805) | TACTTCATTGCTTCTTTTCTGAGACTGTTTTCGCGGTACGCGTTCCATGTGGTCATTCAATCCAGAACTAACATTCTTCTCAA |                       |                       |                       |                       |                       |                       |                                             |
| Sulfolobus turreted icosahedral virus NC_005892 | (17664) | -----                                                                               |                       |                       |                       |                       |                       |                       |                                             |
|                                                 |         | Section 340                                                                         |                       |                       |                       |                       |                       |                       |                                             |
|                                                 | (27121) | <a href="#">27121</a>                                                               | <a href="#">27130</a> | <a href="#">27140</a> | <a href="#">27150</a> | <a href="#">27160</a> | <a href="#">27170</a> | <a href="#">27180</a> | <a href="#">27190</a> <a href="#">27200</a> |
| SARS-CoV-2 Reference Genome NC_045512.2         | (26885) | CGTGCCACTCCATGGCACTATTCTGACCAGACCGCTTCTAGAAAGTGAACCTCGTAATCGGAGCTGTGATCCTTCGTGGAC   |                       |                       |                       |                       |                       |                       |                                             |
| Sulfolobus turreted icosahedral virus NC_005892 | (17664) | -----                                                                               |                       |                       |                       |                       |                       |                       |                                             |
|                                                 |         | Section 341                                                                         |                       |                       |                       |                       |                       |                       |                                             |
|                                                 | (27201) | <a href="#">27201</a>                                                               | <a href="#">27210</a> | <a href="#">27220</a> | <a href="#">27230</a> | <a href="#">27240</a> | <a href="#">27250</a> | <a href="#">27260</a> | <a href="#">27270</a> <a href="#">27280</a> |
| SARS-CoV-2 Reference Genome NC_045512.2         | (26965) | ATCTTCGTATTGCTGGACACCATCTAGGACGCTGTGACATCAAGGACCTGCCTAAAGAAATCACTGTTGCTACATCACGA    |                       |                       |                       |                       |                       |                       |                                             |
| Sulfolobus turreted icosahedral virus NC_005892 | (17664) | -----                                                                               |                       |                       |                       |                       |                       |                       |                                             |
|                                                 |         | Section 342                                                                         |                       |                       |                       |                       |                       |                       |                                             |
|                                                 | (27281) | <a href="#">27281</a>                                                               | <a href="#">27290</a> | <a href="#">27300</a> | <a href="#">27310</a> | <a href="#">27320</a> | <a href="#">27330</a> | <a href="#">27340</a> | <a href="#">27350</a> <a href="#">27360</a> |
| SARS-CoV-2 Reference Genome NC_045512.2         | (27045) | ACGCTTTCTTATTACAAATTGGGAGCTTCGCAGCGTGTAGCAGGTGACTCAGGTTTGTGTCATACAGTCGCTACAGGAT     |                       |                       |                       |                       |                       |                       |                                             |
| Sulfolobus turreted icosahedral virus NC_005892 | (17664) | -----                                                                               |                       |                       |                       |                       |                       |                       |                                             |
|                                                 |         | Section 343                                                                         |                       |                       |                       |                       |                       |                       |                                             |
|                                                 | (27361) | <a href="#">27361</a>                                                               | <a href="#">27370</a> | <a href="#">27380</a> | <a href="#">27390</a> | <a href="#">27400</a> | <a href="#">27410</a> | <a href="#">27420</a> | <a href="#">27430</a> <a href="#">27440</a> |
| SARS-CoV-2 Reference Genome NC_045512.2         | (27125) | TGGCAACTATAAATTAAACACAGACCATTCCAGTAGCAGTGACAATATTGCTTTGCTTGTACAGTAAGTGACAACAGATG    |                       |                       |                       |                       |                       |                       |                                             |
| Sulfolobus turreted icosahedral virus NC_005892 | (17664) | -----                                                                               |                       |                       |                       |                       |                       |                       |                                             |

SARS-CoV-2 & Sulfolobus turreted icosahedral virus.apr

|                                                         |                                                                                   |                       |                       |                       |                       |                       |                       |                       |                       |
|---------------------------------------------------------|-----------------------------------------------------------------------------------|-----------------------|-----------------------|-----------------------|-----------------------|-----------------------|-----------------------|-----------------------|-----------------------|
| Section 344                                             |                                                                                   |                       |                       |                       |                       |                       |                       |                       |                       |
| (27441)                                                 | <a href="#">27441</a>                                                             | <a href="#">27450</a> | <a href="#">27460</a> | <a href="#">27470</a> | <a href="#">27480</a> | <a href="#">27490</a> | <a href="#">27500</a> | <a href="#">27510</a> | <a href="#">27520</a> |
| SARS-CoV-2 Reference Genome NC_045512.2 (27205)         | TTTCATCTCGTTGACTTTCAGGTTACTATAGCAGAGATATTACTAATTATTATGAGGACTTTTAAAGTTTCCATTGGAA   |                       |                       |                       |                       |                       |                       |                       |                       |
| Sulfolobus turreted icosahedral virus NC_005892 (17664) | -----                                                                             |                       |                       |                       |                       |                       |                       |                       |                       |
| Section 345                                             |                                                                                   |                       |                       |                       |                       |                       |                       |                       |                       |
| (27521)                                                 | <a href="#">27521</a>                                                             | <a href="#">27530</a> | <a href="#">27540</a> | <a href="#">27550</a> | <a href="#">27560</a> | <a href="#">27570</a> | <a href="#">27580</a> | <a href="#">27590</a> | <a href="#">27600</a> |
| SARS-CoV-2 Reference Genome NC_045512.2 (27285)         | TCTTGATTACATCATAAACCTCATAATTAAAAATTTATCTAAGTCACTAACTGAGAATAAATATTCTCAATTAGATGAAG  |                       |                       |                       |                       |                       |                       |                       |                       |
| Sulfolobus turreted icosahedral virus NC_005892 (17664) | -----                                                                             |                       |                       |                       |                       |                       |                       |                       |                       |
| Section 346                                             |                                                                                   |                       |                       |                       |                       |                       |                       |                       |                       |
| (27601)                                                 | <a href="#">27601</a>                                                             | <a href="#">27610</a> | <a href="#">27620</a> | <a href="#">27630</a> | <a href="#">27640</a> | <a href="#">27650</a> | <a href="#">27660</a> | <a href="#">27670</a> | <a href="#">27680</a> |
| SARS-CoV-2 Reference Genome NC_045512.2 (27365)         | AGCAACCAATGGAGATTGATTAAACGAACATGAAAATTATTCTTTTCTTGGCACTGATAACACTCGCTACTTGTGAGCTT  |                       |                       |                       |                       |                       |                       |                       |                       |
| Sulfolobus turreted icosahedral virus NC_005892 (17664) | -----                                                                             |                       |                       |                       |                       |                       |                       |                       |                       |
| Section 347                                             |                                                                                   |                       |                       |                       |                       |                       |                       |                       |                       |
| (27681)                                                 | <a href="#">27681</a>                                                             | <a href="#">27690</a> | <a href="#">27700</a> | <a href="#">27710</a> | <a href="#">27720</a> | <a href="#">27730</a> | <a href="#">27740</a> | <a href="#">27750</a> | <a href="#">27760</a> |
| SARS-CoV-2 Reference Genome NC_045512.2 (27445)         | TATCACTACCAAGAGTGTGTTAGAGGTACAACAGTACTTTTAAAGAACCTTGCTCTTCTGGAACATACGAGGGCAATTC   |                       |                       |                       |                       |                       |                       |                       |                       |
| Sulfolobus turreted icosahedral virus NC_005892 (17664) | -----                                                                             |                       |                       |                       |                       |                       |                       |                       |                       |
| Section 348                                             |                                                                                   |                       |                       |                       |                       |                       |                       |                       |                       |
| (27761)                                                 | <a href="#">27761</a>                                                             | <a href="#">27770</a> | <a href="#">27780</a> | <a href="#">27790</a> | <a href="#">27800</a> | <a href="#">27810</a> | <a href="#">27820</a> | <a href="#">27830</a> | <a href="#">27840</a> |
| SARS-CoV-2 Reference Genome NC_045512.2 (27525)         | ACCATTTTCATCCTCTAGCTGATAACAAATTTGCACCTGACTTGCTTTAGCACTCAATTTGCTTTTGCTTGTCTGACGGCG |                       |                       |                       |                       |                       |                       |                       |                       |
| Sulfolobus turreted icosahedral virus NC_005892 (17664) | -----                                                                             |                       |                       |                       |                       |                       |                       |                       |                       |
| Section 349                                             |                                                                                   |                       |                       |                       |                       |                       |                       |                       |                       |
| (27841)                                                 | <a href="#">27841</a>                                                             | <a href="#">27850</a> | <a href="#">27860</a> | <a href="#">27870</a> | <a href="#">27880</a> | <a href="#">27890</a> | <a href="#">27900</a> | <a href="#">27910</a> | <a href="#">27920</a> |
| SARS-CoV-2 Reference Genome NC_045512.2 (27605)         | TAAAACACGTCTATCAGTTACGTGCCAGATCAGTTTCACCTAAACTGTTTCATCAGACAAGAGGAAGTTCAAGAACTTTAC |                       |                       |                       |                       |                       |                       |                       |                       |
| Sulfolobus turreted icosahedral virus NC_005892 (17664) | -----                                                                             |                       |                       |                       |                       |                       |                       |                       |                       |
| Section 350                                             |                                                                                   |                       |                       |                       |                       |                       |                       |                       |                       |
| (27921)                                                 | <a href="#">27921</a>                                                             | <a href="#">27930</a> | <a href="#">27940</a> | <a href="#">27950</a> | <a href="#">27960</a> | <a href="#">27970</a> | <a href="#">27980</a> | <a href="#">27990</a> | <a href="#">28000</a> |
| SARS-CoV-2 Reference Genome NC_045512.2 (27685)         | TCTCCAATTTTCTTATTGTTGCGGCAATAGTGTTTATAACACTTTGCTTCACACTCAAAAGAAAGACAGAATGATTGAA   |                       |                       |                       |                       |                       |                       |                       |                       |
| Sulfolobus turreted icosahedral virus NC_005892 (17664) | -----                                                                             |                       |                       |                       |                       |                       |                       |                       |                       |

SARS-CoV-2 & Sulfolobus turreted icosahedral virus.apr

|                                                 |         |                                                                                     |       |       |       |       |       |       |             |
|-------------------------------------------------|---------|-------------------------------------------------------------------------------------|-------|-------|-------|-------|-------|-------|-------------|
|                                                 |         | Section 351                                                                         |       |       |       |       |       |       |             |
|                                                 | (28001) | 28001                                                                               | 28010 | 28020 | 28030 | 28040 | 28050 | 28060 | 28070 28080 |
| SARS-CoV-2 Reference Genome NC_045512.2         | (27765) | CTTTCATTAATTGACTTCTATTTGTGCTTTTGTAGCCTTTCTGCTATTCTTGTGTTTAAATTATGCTTATTATCTTTTGGTT  |       |       |       |       |       |       |             |
| Sulfolobus turreted icosahedral virus NC_005892 | (17664) | -----                                                                               |       |       |       |       |       |       |             |
|                                                 |         | Section 352                                                                         |       |       |       |       |       |       |             |
|                                                 | (28081) | 28081                                                                               | 28090 | 28100 | 28110 | 28120 | 28130 | 28140 | 28150 28160 |
| SARS-CoV-2 Reference Genome NC_045512.2         | (27845) | CTCACTTGAAGTCAAGATCATAATGAACTTGTACGCCTAAACGAACATGAAATTTCTTGTCTTTCTTAGGAATCATCA      |       |       |       |       |       |       |             |
| Sulfolobus turreted icosahedral virus NC_005892 | (17664) | -----                                                                               |       |       |       |       |       |       |             |
|                                                 |         | Section 353                                                                         |       |       |       |       |       |       |             |
|                                                 | (28161) | 28161                                                                               | 28170 | 28180 | 28190 | 28200 | 28210 | 28220 | 28230 28240 |
| SARS-CoV-2 Reference Genome NC_045512.2         | (27925) | CAACTGTAGCTGCATTTACCAAGAATGTAGTTTACAGTCATGTACTCAACATCAACCATATGTAGTTGATGACCCGTGT     |       |       |       |       |       |       |             |
| Sulfolobus turreted icosahedral virus NC_005892 | (17664) | -----                                                                               |       |       |       |       |       |       |             |
|                                                 |         | Section 354                                                                         |       |       |       |       |       |       |             |
|                                                 | (28241) | 28241                                                                               | 28250 | 28260 | 28270 | 28280 | 28290 | 28300 | 28310 28320 |
| SARS-CoV-2 Reference Genome NC_045512.2         | (28005) | CCTATTCACTTCTATTCTAAATGGTATATTAGAGTAGGAGCTAGAAAAATCAGCACCTTTAATTGAATTGTGCGTGGATGA   |       |       |       |       |       |       |             |
| Sulfolobus turreted icosahedral virus NC_005892 | (17664) | -----                                                                               |       |       |       |       |       |       |             |
|                                                 |         | Section 355                                                                         |       |       |       |       |       |       |             |
|                                                 | (28321) | 28321                                                                               | 28330 | 28340 | 28350 | 28360 | 28370 | 28380 | 28390 28400 |
| SARS-CoV-2 Reference Genome NC_045512.2         | (28085) | GGCTGGTTCTAAATCACCCATTCAGTACATCGATATCGGTAATTATACAGTTTCCTGTTTACCTTTTACAATTAATTGCC    |       |       |       |       |       |       |             |
| Sulfolobus turreted icosahedral virus NC_005892 | (17664) | -----                                                                               |       |       |       |       |       |       |             |
|                                                 |         | Section 356                                                                         |       |       |       |       |       |       |             |
|                                                 | (28401) | 28401                                                                               | 28410 | 28420 | 28430 | 28440 | 28450 | 28460 | 28470 28480 |
| SARS-CoV-2 Reference Genome NC_045512.2         | (28165) | AGGAACCTAAATTGGGTAGTCTTGTAGTGCGTTGTTCTGTTCTATGAAGACTTTTGTAGAGTATCATGACGTTTCGTGTTGTT |       |       |       |       |       |       |             |
| Sulfolobus turreted icosahedral virus NC_005892 | (17664) | -----                                                                               |       |       |       |       |       |       |             |
|                                                 |         | Section 357                                                                         |       |       |       |       |       |       |             |
|                                                 | (28481) | 28481                                                                               | 28490 | 28500 | 28510 | 28520 | 28530 | 28540 | 28550 28560 |
| SARS-CoV-2 Reference Genome NC_045512.2         | (28245) | TTAGATTTTCATCTAAACGAACAACTAAAATGTCTGATAATGGACCCCAAAATCAGCGAAATGCACCCCGCATTACGTTT    |       |       |       |       |       |       |             |
| Sulfolobus turreted icosahedral virus NC_005892 | (17664) | -----                                                                               |       |       |       |       |       |       |             |

SARS-CoV-2 & Sulfolobus turreted icosahedral virus.apr

|                                                 |         |                                                                                   |                       |                       |                       |                       |                       |                       |                                             |
|-------------------------------------------------|---------|-----------------------------------------------------------------------------------|-----------------------|-----------------------|-----------------------|-----------------------|-----------------------|-----------------------|---------------------------------------------|
|                                                 |         | Section 358                                                                       |                       |                       |                       |                       |                       |                       |                                             |
|                                                 | (28561) | <a href="#">28561</a>                                                             | <a href="#">28570</a> | <a href="#">28580</a> | <a href="#">28590</a> | <a href="#">28600</a> | <a href="#">28610</a> | <a href="#">28620</a> | <a href="#">28630</a> <a href="#">28640</a> |
| SARS-CoV-2 Reference Genome NC_045512.2         | (28325) | GGTGGACCCTCAGATTCAACTGGCAGTAACCAGAATGGAGAACGCAGTGGGGCGCGATCAAAACAACGTCGGCCCCAAGG  |                       |                       |                       |                       |                       |                       |                                             |
| Sulfolobus turreted icosahedral virus NC_005892 | (17664) | -----                                                                             |                       |                       |                       |                       |                       |                       |                                             |
|                                                 |         | Section 359                                                                       |                       |                       |                       |                       |                       |                       |                                             |
|                                                 | (28641) | <a href="#">28641</a>                                                             | <a href="#">28650</a> | <a href="#">28660</a> | <a href="#">28670</a> | <a href="#">28680</a> | <a href="#">28690</a> | <a href="#">28700</a> | <a href="#">28710</a> <a href="#">28720</a> |
| SARS-CoV-2 Reference Genome NC_045512.2         | (28405) | TTTACCCAATAATACTGCGTCTTGTTTCACCGCTCTCACTCAACATGGCAAGGAAGACCTTAAATTCCCTCGAGGACAAG  |                       |                       |                       |                       |                       |                       |                                             |
| Sulfolobus turreted icosahedral virus NC_005892 | (17664) | -----                                                                             |                       |                       |                       |                       |                       |                       |                                             |
|                                                 |         | Section 360                                                                       |                       |                       |                       |                       |                       |                       |                                             |
|                                                 | (28721) | <a href="#">28721</a>                                                             | <a href="#">28730</a> | <a href="#">28740</a> | <a href="#">28750</a> | <a href="#">28760</a> | <a href="#">28770</a> | <a href="#">28780</a> | <a href="#">28790</a> <a href="#">28800</a> |
| SARS-CoV-2 Reference Genome NC_045512.2         | (28485) | GCGTTCCAATTAACACCAATAGCAGTCCAGATGACCAAATTGGCTACTACCGAAGAGCTACCAGACGAATTCGTGGTGGT  |                       |                       |                       |                       |                       |                       |                                             |
| Sulfolobus turreted icosahedral virus NC_005892 | (17664) | -----                                                                             |                       |                       |                       |                       |                       |                       |                                             |
|                                                 |         | Section 361                                                                       |                       |                       |                       |                       |                       |                       |                                             |
|                                                 | (28801) | <a href="#">28801</a>                                                             | <a href="#">28810</a> | <a href="#">28820</a> | <a href="#">28830</a> | <a href="#">28840</a> | <a href="#">28850</a> | <a href="#">28860</a> | <a href="#">28870</a> <a href="#">28880</a> |
| SARS-CoV-2 Reference Genome NC_045512.2         | (28565) | GACGGTAAATGAAAGATCTCAGTCCAAGATGGTATTTCTACTACCTAGGAAGCTGGGCCAGAAGCTGGACTTCCCTATGG  |                       |                       |                       |                       |                       |                       |                                             |
| Sulfolobus turreted icosahedral virus NC_005892 | (17664) | -----                                                                             |                       |                       |                       |                       |                       |                       |                                             |
|                                                 |         | Section 362                                                                       |                       |                       |                       |                       |                       |                       |                                             |
|                                                 | (28881) | <a href="#">28881</a>                                                             | <a href="#">28890</a> | <a href="#">28900</a> | <a href="#">28910</a> | <a href="#">28920</a> | <a href="#">28930</a> | <a href="#">28940</a> | <a href="#">28950</a> <a href="#">28960</a> |
| SARS-CoV-2 Reference Genome NC_045512.2         | (28645) | TGCTAACAAAGACGGCATCATATGGGTTGCAACTGAGGGAGCCTTGAATACACCAAAAGATCACATTGGCACCCGCAATC  |                       |                       |                       |                       |                       |                       |                                             |
| Sulfolobus turreted icosahedral virus NC_005892 | (17664) | -----                                                                             |                       |                       |                       |                       |                       |                       |                                             |
|                                                 |         | Section 363                                                                       |                       |                       |                       |                       |                       |                       |                                             |
|                                                 | (28961) | <a href="#">28961</a>                                                             | <a href="#">28970</a> | <a href="#">28980</a> | <a href="#">28990</a> | <a href="#">29000</a> | <a href="#">29010</a> | <a href="#">29020</a> | <a href="#">29030</a> <a href="#">29040</a> |
| SARS-CoV-2 Reference Genome NC_045512.2         | (28725) | CTGCTAACAATGCTGCAATCGTGCTACAACCTTCTCAAGGAACAACATTGCCAAAAGGCTTCTACGCAGAAGGGAGCAGA  |                       |                       |                       |                       |                       |                       |                                             |
| Sulfolobus turreted icosahedral virus NC_005892 | (17664) | -----                                                                             |                       |                       |                       |                       |                       |                       |                                             |
|                                                 |         | Section 364                                                                       |                       |                       |                       |                       |                       |                       |                                             |
|                                                 | (29041) | <a href="#">29041</a>                                                             | <a href="#">29050</a> | <a href="#">29060</a> | <a href="#">29070</a> | <a href="#">29080</a> | <a href="#">29090</a> | <a href="#">29100</a> | <a href="#">29110</a> <a href="#">29120</a> |
| SARS-CoV-2 Reference Genome NC_045512.2         | (28805) | GGCGGCAGTCAAGCCTCTTCTCGTTTCCTCATCACGTAGTCGCAACAGTTCAAGAAATTCAACTCCAGGCAGCAGTAGGGG |                       |                       |                       |                       |                       |                       |                                             |
| Sulfolobus turreted icosahedral virus NC_005892 | (17664) | -----                                                                             |                       |                       |                       |                       |                       |                       |                                             |

SARS-CoV-2 & Sulfolobus turreted icosahedral virus.apr

|                                                 |         |                                                                                      |                       |                       |                       |                       |                       |                       |                                             |
|-------------------------------------------------|---------|--------------------------------------------------------------------------------------|-----------------------|-----------------------|-----------------------|-----------------------|-----------------------|-----------------------|---------------------------------------------|
|                                                 |         | Section 365                                                                          |                       |                       |                       |                       |                       |                       |                                             |
|                                                 | (29121) | <a href="#">29121</a>                                                                | <a href="#">29130</a> | <a href="#">29140</a> | <a href="#">29150</a> | <a href="#">29160</a> | <a href="#">29170</a> | <a href="#">29180</a> | <a href="#">29190</a> <a href="#">29200</a> |
| SARS-CoV-2 Reference Genome NC_045512.2         | (28885) | AACTTCTCCTGCTAGAATGGCTGGCAATGGCGGTGATGCTGCTCTTGCTTTGCTGCTGCTTGACAGATTGAACCAGCTTG     |                       |                       |                       |                       |                       |                       |                                             |
| Sulfolobus turreted icosahedral virus NC_005892 | (17664) | -----                                                                                |                       |                       |                       |                       |                       |                       |                                             |
|                                                 |         | Section 366                                                                          |                       |                       |                       |                       |                       |                       |                                             |
|                                                 | (29201) | <a href="#">29201</a>                                                                | <a href="#">29210</a> | <a href="#">29220</a> | <a href="#">29230</a> | <a href="#">29240</a> | <a href="#">29250</a> | <a href="#">29260</a> | <a href="#">29270</a> <a href="#">29280</a> |
| SARS-CoV-2 Reference Genome NC_045512.2         | (28965) | AGAGCAAAATGTCTGGTAAAGGCCAACAACAACAAGGCCAAACTGTCACCTAAGAAATCTGCTGCTGAGGCTTCTAAGAAG    |                       |                       |                       |                       |                       |                       |                                             |
| Sulfolobus turreted icosahedral virus NC_005892 | (17664) | -----                                                                                |                       |                       |                       |                       |                       |                       |                                             |
|                                                 |         | Section 367                                                                          |                       |                       |                       |                       |                       |                       |                                             |
|                                                 | (29281) | <a href="#">29281</a>                                                                | <a href="#">29290</a> | <a href="#">29300</a> | <a href="#">29310</a> | <a href="#">29320</a> | <a href="#">29330</a> | <a href="#">29340</a> | <a href="#">29350</a> <a href="#">29360</a> |
| SARS-CoV-2 Reference Genome NC_045512.2         | (29045) | CCTCGGCCAAAAACGTACTGCCACTAAAGCATACAAATGTAACACAAAGCTTTCGGCAGACGTGGTCCAGAACAAACCCCAAGG |                       |                       |                       |                       |                       |                       |                                             |
| Sulfolobus turreted icosahedral virus NC_005892 | (17664) | -----                                                                                |                       |                       |                       |                       |                       |                       |                                             |
|                                                 |         | Section 368                                                                          |                       |                       |                       |                       |                       |                       |                                             |
|                                                 | (29361) | <a href="#">29361</a>                                                                | <a href="#">29370</a> | <a href="#">29380</a> | <a href="#">29390</a> | <a href="#">29400</a> | <a href="#">29410</a> | <a href="#">29420</a> | <a href="#">29430</a> <a href="#">29440</a> |
| SARS-CoV-2 Reference Genome NC_045512.2         | (29175) | AAATTTTGGGGACCAGGAACCTAATCAGACAAGGAACCTGATTACAAACATTGGCCGCAAATTGCACAATTTGCCCCAGCG    |                       |                       |                       |                       |                       |                       |                                             |
| Sulfolobus turreted icosahedral virus NC_005892 | (17664) | -----                                                                                |                       |                       |                       |                       |                       |                       |                                             |
|                                                 |         | Section 369                                                                          |                       |                       |                       |                       |                       |                       |                                             |
|                                                 | (29441) | <a href="#">29441</a>                                                                | <a href="#">29450</a> | <a href="#">29460</a> | <a href="#">29470</a> | <a href="#">29480</a> | <a href="#">29490</a> | <a href="#">29500</a> | <a href="#">29510</a> <a href="#">29520</a> |
| SARS-CoV-2 Reference Genome NC_045512.2         | (29205) | CTTCAGCGTTCTTCGGAATGTCGCGCATTGGCATGGAAGTCACACCTTCGGGAACGTGGTTGACCTACACAGGTGCCATC     |                       |                       |                       |                       |                       |                       |                                             |
| Sulfolobus turreted icosahedral virus NC_005892 | (17664) | -----                                                                                |                       |                       |                       |                       |                       |                       |                                             |
|                                                 |         | Section 370                                                                          |                       |                       |                       |                       |                       |                       |                                             |
|                                                 | (29521) | <a href="#">29521</a>                                                                | <a href="#">29530</a> | <a href="#">29540</a> | <a href="#">29550</a> | <a href="#">29560</a> | <a href="#">29570</a> | <a href="#">29580</a> | <a href="#">29590</a> <a href="#">29600</a> |
| SARS-CoV-2 Reference Genome NC_045512.2         | (29285) | AAATTGGATGACAAAGATCCAAATTTCAAAGATCAAGTCATTTTGCTGAATAAGCATATTGACGCATACAAAACATTCCC     |                       |                       |                       |                       |                       |                       |                                             |
| Sulfolobus turreted icosahedral virus NC_005892 | (17664) | -----                                                                                |                       |                       |                       |                       |                       |                       |                                             |
|                                                 |         | Section 371                                                                          |                       |                       |                       |                       |                       |                       |                                             |
|                                                 | (29601) | <a href="#">29601</a>                                                                | <a href="#">29610</a> | <a href="#">29620</a> | <a href="#">29630</a> | <a href="#">29640</a> | <a href="#">29650</a> | <a href="#">29660</a> | <a href="#">29670</a> <a href="#">29680</a> |
| SARS-CoV-2 Reference Genome NC_045512.2         | (29365) | ACCAACAGAGCCTAAAAAGGACAAAAAGAAGAAGGCTGATGAACTCAAGCCTTACCGCAGAGACAGAAGAAACAGCAAA      |                       |                       |                       |                       |                       |                       |                                             |
| Sulfolobus turreted icosahedral virus NC_005892 | (17664) | -----                                                                                |                       |                       |                       |                       |                       |                       |                                             |

SARS-CoV-2 & Sulfolobus turreted icosahedral virus.apr

|                                                         |                                                                                   |       |       |       |       |       |       |       |       |
|---------------------------------------------------------|-----------------------------------------------------------------------------------|-------|-------|-------|-------|-------|-------|-------|-------|
| Section 372                                             |                                                                                   |       |       |       |       |       |       |       |       |
| (29681)                                                 | 29681                                                                             | 29690 | 29700 | 29710 | 29720 | 29730 | 29740 | 29750 | 29760 |
| SARS-CoV-2 Reference Genome NC_045512.2 (29445)         | CTGTGACTCTTCTTCCTGCTGCAGATTTGGATGATTTCTCCAAACAATTGCAACAATCCATGAGCAGTGCTGACTCAACT  |       |       |       |       |       |       |       |       |
| Sulfolobus turreted icosahedral virus NC_005892 (17664) | -----                                                                             |       |       |       |       |       |       |       |       |
| Section 373                                             |                                                                                   |       |       |       |       |       |       |       |       |
| (29761)                                                 | 29761                                                                             | 29770 | 29780 | 29790 | 29800 | 29810 | 29820 | 29830 | 29840 |
| SARS-CoV-2 Reference Genome NC_045512.2 (29525)         | CAGGCCTAAACTCATGCAGACCACACAAGGCAGATGGGCTATATAAACGTTTTTCGCTTTTCCGTTTACGATATATAGTCT |       |       |       |       |       |       |       |       |
| Sulfolobus turreted icosahedral virus NC_005892 (17664) | -----                                                                             |       |       |       |       |       |       |       |       |
| Section 374                                             |                                                                                   |       |       |       |       |       |       |       |       |
| (29841)                                                 | 29841                                                                             | 29850 | 29860 | 29870 | 29880 | 29890 | 29900 | 29910 | 29920 |
| SARS-CoV-2 Reference Genome NC_045512.2 (29605)         | ACTCTTGTGCAGAATGAATTCTCGTAACTACATAGCACAAAGTAGATGTAGTTAACTTTAATCTCACATAGCAATCTTTAA |       |       |       |       |       |       |       |       |
| Sulfolobus turreted icosahedral virus NC_005892 (17664) | -----                                                                             |       |       |       |       |       |       |       |       |
| Section 375                                             |                                                                                   |       |       |       |       |       |       |       |       |
| (29921)                                                 | 29921                                                                             | 29930 | 29940 | 29950 | 29960 | 29970 | 29980 | 29990 | 30000 |
| SARS-CoV-2 Reference Genome NC_045512.2 (29685)         | TCAGTGTGTAACATTAGGGAGGACTTGAAAGAGCCACCACATTTTCACCGAGGCCACGCGGAGTACGATCGAGTGTACAG  |       |       |       |       |       |       |       |       |
| Sulfolobus turreted icosahedral virus NC_005892 (17664) | -----                                                                             |       |       |       |       |       |       |       |       |
| Section 376                                             |                                                                                   |       |       |       |       |       |       |       |       |
| (30001)                                                 | 30001                                                                             | 30010 | 30020 | 30030 | 30040 | 30050 | 30060 | 30070 | 30080 |
| SARS-CoV-2 Reference Genome NC_045512.2 (29765)         | TGAACAATGCTAGGGAGAGCTGCCTATATGGAAGAGCCCTAATGTGTAAAATTAATTTTAGTAGTGCTATCCCCATGTGA  |       |       |       |       |       |       |       |       |
| Sulfolobus turreted icosahedral virus NC_005892 (17664) | -----                                                                             |       |       |       |       |       |       |       |       |
| Section 377                                             |                                                                                   |       |       |       |       |       |       |       |       |
| (30081)                                                 | 30081                                                                             | 30090 | 30100 | 30110 | 30120 | 30139 |       |       |       |
| SARS-CoV-2 Reference Genome NC_045512.2 (29845)         | TTTTAATAGCTTCTTAGGAGAATGACAAAAAAAAAAAAAAAAAAAAAAAAAAAAAAAAAAAAA                   |       |       |       |       |       |       |       |       |
| Sulfolobus turreted icosahedral virus NC_005892 (17664) | -----                                                                             |       |       |       |       |       |       |       |       |
