# Supplementary material for: Ubiquitous Micro-Modular Homologies among Genomes from Viruses to Bacteria to Human Mitochondrial DNA: Platforms for Recombination during Evolution?
Source: MDPI journal article supplement (doi:10.3390/v14050885), 2022-04-24
Supplement: s1 [file s1]

## SARS-CoV-2 &amp; Bakterien.apr

|                                                      |       |                                                                                 |     |     |     |     |     |     |     |     |  |
|------------------------------------------------------|-------|---------------------------------------------------------------------------------|-----|-----|-----|-----|-----|-----|-----|-----|--|
|                                                      |       | Section 1                                                                       |     |     |     |     |     |     |     |     |  |
|                                                      |       | (1)                                                                             | 1   | 11  | 22  | 33  | 44  | 55  | 66  | 77  |  |
| Candidatus Carsonella ruddii strain BT chromosome... | (1)   | AAATAATTAATATTAAAGAAATAATTAATATTAAAAAATACATAATGTAATTTCTTATATTAATAAAATTTTAATT    |     |     |     |     |     |     |     |     |  |
| Candidatus Carsonella 135557 - 167442nt              | (1)   | -----                                                                           |     |     |     |     |     |     |     |     |  |
| SARS-CoV-2 Reference Genome NC_045512.2              | (1)   | -----                                                                           |     |     |     |     |     |     |     |     |  |
|                                                      |       | Section 2                                                                       |     |     |     |     |     |     |     |     |  |
|                                                      |       | (78)                                                                            | 78  | 88  | 99  | 110 | 121 | 132 | 143 | 154 |  |
| Candidatus Carsonella ruddii strain BT chromosome... | (78)  | TATAATAATTCAATAAAACAAATAGAAAATATTATTTTTTGGTTGTTTCCAATTATACCAAATATTTCTAAAATTTT   |     |     |     |     |     |     |     |     |  |
| Candidatus Carsonella 135557 - 167442nt              | (1)   | -----                                                                           |     |     |     |     |     |     |     |     |  |
| SARS-CoV-2 Reference Genome NC_045512.2              | (1)   | -----                                                                           |     |     |     |     |     |     |     |     |  |
|                                                      |       | Section 3                                                                       |     |     |     |     |     |     |     |     |  |
|                                                      |       | (155)                                                                           | 155 | 165 | 176 | 187 | 198 | 209 | 220 | 231 |  |
| Candidatus Carsonella ruddii strain BT chromosome... | (155) | TTGGTTTAAAAATTGGAAATTTATTTCCAATTGAAAAATTTAAAAATCAAAATTTAATATTAAAAAAATTTAAATTT   |     |     |     |     |     |     |     |     |  |
| Candidatus Carsonella 135557 - 167442nt              | (1)   | -----                                                                           |     |     |     |     |     |     |     |     |  |
| SARS-CoV-2 Reference Genome NC_045512.2              | (1)   | -----                                                                           |     |     |     |     |     |     |     |     |  |
|                                                      |       | Section 4                                                                       |     |     |     |     |     |     |     |     |  |
|                                                      |       | (232)                                                                           | 232 | 242 | 253 | 264 | 275 | 286 | 297 | 308 |  |
| Candidatus Carsonella ruddii strain BT chromosome... | (232) | ATTATAAACAAAAATTTATTAAGTCTATTAATAATATAGAAATAAAAAATAATTTCTAATAAAAAATATTTATATTCAA |     |     |     |     |     |     |     |     |  |
| Candidatus Carsonella 135557 - 167442nt              | (1)   | -----                                                                           |     |     |     |     |     |     |     |     |  |
| SARS-CoV-2 Reference Genome NC_045512.2              | (1)   | -----                                                                           |     |     |     |     |     |     |     |     |  |
|                                                      |       | Section 5                                                                       |     |     |     |     |     |     |     |     |  |
|                                                      |       | (309)                                                                           | 309 | 319 | 330 | 341 | 352 | 363 | 374 | 385 |  |
| Candidatus Carsonella ruddii strain BT chromosome... | (309) | AAAATTATATTTTCAATGGATAAAATTTCTATTTTAATAGAAATAATATCTTCTAAATTATTAAAAATTTAAATTTT   |     |     |     |     |     |     |     |     |  |
| Candidatus Carsonella 135557 - 167442nt              | (1)   | -----                                                                           |     |     |     |     |     |     |     |     |  |
| SARS-CoV-2 Reference Genome NC_045512.2              | (1)   | -----                                                                           |     |     |     |     |     |     |     |     |  |
|                                                      |       | Section 6                                                                       |     |     |     |     |     |     |     |     |  |
|                                                      |       | (386)                                                                           | 386 | 396 | 407 | 418 | 429 | 440 | 451 | 462 |  |
| Candidatus Carsonella ruddii strain BT chromosome... | (386) | TTTTTTATTTTTTTAATTTTTTGTAAATATATCATTATTTTTATTATTTATAGCTCCAGCATGCCCCATAATTTTTTC  |     |     |     |     |     |     |     |     |  |
| Candidatus Carsonella 135557 - 167442nt              | (1)   | -----                                                                           |     |     |     |     |     |     |     |     |  |
| SARS-CoV-2 Reference Genome NC_045512.2              | (1)   | -----                                                                           |     |     |     |     |     |     |     |     |  |

## SARS-CoV-2 &amp; Bakterien.apr

|                                                      |       |                                                                                |     |     |     |     |     |     |     |
|------------------------------------------------------|-------|--------------------------------------------------------------------------------|-----|-----|-----|-----|-----|-----|-----|
|                                                      |       | Section 7                                                                      |     |     |     |     |     |     |     |
| Candidatus Carsonella ruddii strain BT chromosome... | (463) | 463                                                                            | 473 | 484 | 495 | 506 | 517 | 528 | 539 |
|                                                      | (463) | TAATGGAGAAAAACACCAGAAATAAAAAAACATTGGTTTTTTTTTAAATTTTGAAAAATAAAATTTCTATATTTTC   |     |     |     |     |     |     |     |
|                                                      | (1)   | -----                                                                          |     |     |     |     |     |     |     |
|                                                      | (1)   | -----                                                                          |     |     |     |     |     |     |     |
|                                                      |       | Section 8                                                                      |     |     |     |     |     |     |     |
| Candidatus Carsonella ruddii strain BT chromosome... | (540) | 540                                                                            | 550 | 561 | 572 | 583 | 594 | 605 | 616 |
|                                                      | (540) | CTCCAATTTCTCCTATTATTAAATTTTTTTGTAAAAATTAACTAAATAATGGTAAAAATTTTTTAAATTAATA      |     |     |     |     |     |     |     |
|                                                      | (1)   | -----                                                                          |     |     |     |     |     |     |     |
|                                                      | (1)   | -----                                                                          |     |     |     |     |     |     |     |
|                                                      |       | Section 9                                                                      |     |     |     |     |     |     |     |
| Candidatus Carsonella ruddii strain BT chromosome... | (617) | 617                                                                            | 627 | 638 | 649 | 660 | 671 | 682 | 693 |
|                                                      | (617) | TTTATGACTACATCACCTCCTATTTCCTAAACATAAAGATTGACCTATATTTAATTTATTAGATATTTTTATAGCTTC |     |     |     |     |     |     |     |
|                                                      | (1)   | -----                                                                          |     |     |     |     |     |     |     |
|                                                      | (1)   | -----                                                                          |     |     |     |     |     |     |     |
|                                                      |       | Section 10                                                                     |     |     |     |     |     |     |     |
| Candidatus Carsonella ruddii strain BT chromosome... | (694) | 694                                                                            | 704 | 715 | 726 | 737 | 748 | 759 | 770 |
|                                                      | (694) | ATATGTTAAAGTTCCAGATCTTGAAATAATTGCTAAATATCCTTTTTTATATATTTTAAAGGAAAAATACCAAGTC   |     |     |     |     |     |     |     |
|                                                      | (1)   | -----                                                                          |     |     |     |     |     |     |     |
|                                                      | (1)   | -----                                                                          |     |     |     |     |     |     |     |
|                                                      |       | Section 11                                                                     |     |     |     |     |     |     |     |
| Candidatus Carsonella ruddii strain BT chromosome... | (771) | 771                                                                            | 781 | 792 | 803 | 814 | 825 | 836 | 847 |
|                                                      | (771) | TAATATTAAATATGGTAAATAATTCTGGAGAATTAGGACCTATAAATATTATGTTATATTTATTACAATAATAT     |     |     |     |     |     |     |     |
|                                                      | (1)   | -----                                                                          |     |     |     |     |     |     |     |
|                                                      | (1)   | -----                                                                          |     |     |     |     |     |     |     |
|                                                      |       | Section 12                                                                     |     |     |     |     |     |     |     |
| Candidatus Carsonella ruddii strain BT chromosome... | (848) | 848                                                                            | 858 | 869 | 880 | 891 | 902 | 913 | 924 |
|                                                      | (848) | TTTATTTTTTAAATATCAAAAATTGATATATTTTCAGTTATGCATATTATAATTTTTATACCTGAAAATATATTTTC  |     |     |     |     |     |     |     |
|                                                      | (1)   | -----                                                                          |     |     |     |     |     |     |     |
|                                                      | (1)   | -----                                                                          |     |     |     |     |     |     |     |

## SARS-CoV-2 &amp; Bakterien.apr

|                                                      |        |                                                                                 |      |      |      |      |      |      |      |
|------------------------------------------------------|--------|---------------------------------------------------------------------------------|------|------|------|------|------|------|------|
|                                                      |        | Section 13                                                                      |      |      |      |      |      |      |      |
| Candidatus Carsonella ruddii strain BT chromosome... | (925)  | 925                                                                             | 935  | 946  | 957  | 968  | 979  | 990  | 1001 |
|                                                      | (925)  | TAATATAATGTTTTTACAAAATAAAAACGGAACAAATATAATTGAAATTTTACATTTAGTTATTTTTAAAGCTTTTA   |      |      |      |      |      |      |      |
|                                                      | (1)    | -----                                                                           |      |      |      |      |      |      |      |
|                                                      | (1)    | -----                                                                           |      |      |      |      |      |      |      |
|                                                      |        | Section 14                                                                      |      |      |      |      |      |      |      |
| Candidatus Carsonella ruddii strain BT chromosome... | (1002) | 1002                                                                            | 1012 | 1023 | 1034 | 1045 | 1056 | 1067 | 1078 |
|                                                      | (1002) | AACTAGAAGAAAAAATTGGTAAATTTAAAATTAAATAACCCCTTTTTTTTATAATTTAAACCACAAGAAAAAATGTT   |      |      |      |      |      |      |      |
|                                                      | (1)    | -----                                                                           |      |      |      |      |      |      |      |
|                                                      | (1)    | -----                                                                           |      |      |      |      |      |      |      |
|                                                      |        | Section 15                                                                      |      |      |      |      |      |      |      |
| Candidatus Carsonella ruddii strain BT chromosome... | (1079) | 1079                                                                            | 1089 | 1100 | 1111 | 1122 | 1133 | 1144 | 1155 |
|                                                      | (1079) | CCATAATTAATAGAAATTTTAGTATGAAAAAACCAAATTTACCAGTTAAACCACAAGATAAAATTTTTTTATTTAA    |      |      |      |      |      |      |      |
|                                                      | (1)    | -----                                                                           |      |      |      |      |      |      |      |
|                                                      | (1)    | -----                                                                           |      |      |      |      |      |      |      |
|                                                      |        | Section 16                                                                      |      |      |      |      |      |      |      |
| Candidatus Carsonella ruddii strain BT chromosome... | (1156) | 1156                                                                            | 1166 | 1177 | 1188 | 1199 | 1210 | 1221 | 1232 |
|                                                      | (1156) | CATTTGATAAAATTATACATTTTTTAATACAATTATTTAAATTTTCGATAATTATTAAATTTTTTAAATTTTATTAAT  |      |      |      |      |      |      |      |
|                                                      | (1)    | -----                                                                           |      |      |      |      |      |      |      |
|                                                      | (1)    | -----                                                                           |      |      |      |      |      |      |      |
|                                                      |        | Section 17                                                                      |      |      |      |      |      |      |      |
| Candidatus Carsonella ruddii strain BT chromosome... | (1233) | 1233                                                                            | 1243 | 1254 | 1265 | 1276 | 1287 | 1298 | 1309 |
|                                                      | (1233) | TTTTTTTTAGAATAATTAGAAAAAGCTCCATCTAATCTAATTATTATTTTATGATTAAAAATCAAATACATATAATT   |      |      |      |      |      |      |      |
|                                                      | (1)    | -----                                                                           |      |      |      |      |      |      |      |
|                                                      | (1)    | -----                                                                           |      |      |      |      |      |      |      |
|                                                      |        | Section 18                                                                      |      |      |      |      |      |      |      |
| Candidatus Carsonella ruddii strain BT chromosome... | (1310) | 1310                                                                            | 1320 | 1331 | 1342 | 1353 | 1364 | 1375 | 1386 |
|                                                      | (1310) | TAATAAAGAGTTTAAATATTTTTTTACAAGAACTATTCCTCCAAATAAATTTATAAACAAAATTTTAAATATTTTATAG |      |      |      |      |      |      |      |
|                                                      | (1)    | -----                                                                           |      |      |      |      |      |      |      |
|                                                      | (1)    | -----                                                                           |      |      |      |      |      |      |      |

## SARS-CoV-2 &amp; Bakterien.apr

|                                                      |        |                                                                                |      |      |      |      |      |      |      |
|------------------------------------------------------|--------|--------------------------------------------------------------------------------|------|------|------|------|------|------|------|
|                                                      |        | Section 19                                                                     |      |      |      |      |      |      |      |
| Candidatus Carsonella ruddii strain BT chromosome... | (1387) | 1387                                                                           | 1397 | 1408 | 1419 | 1430 | 1441 | 1452 | 1463 |
|                                                      | (1387) | TTAAAACAAAATTAAATAAATTATTTATTTGCAAATCTTTAATTTGACCGCTTAAATCTATAAAATTAAAACATTTA  |      |      |      |      |      |      |      |
|                                                      | (1)    | -----                                                                          |      |      |      |      |      |      |      |
|                                                      | (1)    | -----                                                                          |      |      |      |      |      |      |      |
|                                                      |        | Section 20                                                                     |      |      |      |      |      |      |      |
| Candidatus Carsonella ruddii strain BT chromosome... | (1464) | 1464                                                                           | 1474 | 1485 | 1496 | 1507 | 1518 | 1529 | 1540 |
|                                                      | (1464) | GAATTATTATAACAAAAAAATCTAAAGTTTTTAAAGCTAAACCTGCTCCATTTACTATACAACAAATTTTACCTTT   |      |      |      |      |      |      |      |
|                                                      | (1)    | -----                                                                          |      |      |      |      |      |      |      |
|                                                      | (1)    | -----                                                                          |      |      |      |      |      |      |      |
|                                                      |        | Section 21                                                                     |      |      |      |      |      |      |      |
| Candidatus Carsonella ruddii strain BT chromosome... | (1541) | 1541                                                                           | 1551 | 1562 | 1573 | 1584 | 1595 | 1606 | 1617 |
|                                                      | (1541) | TAATTGAATATAATTTATTTTTAATAAATTTGAAATTTTTTCAGAAAAATTTAAATACTTTTTTTTTTCAATAACAA  |      |      |      |      |      |      |      |
|                                                      | (1)    | -----                                                                          |      |      |      |      |      |      |      |
|                                                      | (1)    | -----                                                                          |      |      |      |      |      |      |      |
|                                                      |        | Section 22                                                                     |      |      |      |      |      |      |      |
| Candidatus Carsonella ruddii strain BT chromosome... | (1618) | 1618                                                                           | 1628 | 1639 | 1650 | 1661 | 1672 | 1683 | 1694 |
|                                                      | (1618) | TTTTACAATCTAATATATAAATATTGTTATTATTTATTATTAAAGGATTAATTTCTATTAATAAAATATTTTTTATA  |      |      |      |      |      |      |      |
|                                                      | (1)    | -----                                                                          |      |      |      |      |      |      |      |
|                                                      | (1)    | -----                                                                          |      |      |      |      |      |      |      |
|                                                      |        | Section 23                                                                     |      |      |      |      |      |      |      |
| Candidatus Carsonella ruddii strain BT chromosome... | (1695) | 1695                                                                           | 1705 | 1716 | 1727 | 1738 | 1749 | 1760 | 1771 |
|                                                      | (1695) | AATAAAATTTTGTATATATTATAAATTATATTAATAATTTTTTTTATAGAATTATTATTAAATAACAATTTGATAA   |      |      |      |      |      |      |      |
|                                                      | (1)    | -----                                                                          |      |      |      |      |      |      |      |
|                                                      | (1)    | -----                                                                          |      |      |      |      |      |      |      |
|                                                      |        | Section 24                                                                     |      |      |      |      |      |      |      |
| Candidatus Carsonella ruddii strain BT chromosome... | (1772) | 1772                                                                           | 1782 | 1793 | 1804 | 1815 | 1826 | 1837 | 1848 |
|                                                      | (1772) | ATAATCAAAAATAGAAAAATTAATAATTAATAAATTTATTTTAAATTTTAAAAAATTAATTTTTTTTTTGTAGTTCTA |      |      |      |      |      |      |      |
|                                                      | (1)    | -----                                                                          |      |      |      |      |      |      |      |
|                                                      | (1)    | -----                                                                          |      |      |      |      |      |      |      |

## SARS-CoV-2 &amp; Bakterien.apr

|                                                                                                                                            |        |                                                                                |      |      |      |      |      |      |      |
|--------------------------------------------------------------------------------------------------------------------------------------------|--------|--------------------------------------------------------------------------------|------|------|------|------|------|------|------|
| Section 25                                                                                                                                 |        |                                                                                |      |      |      |      |      |      |      |
| Candidatus Carsonella ruddii strain BT chromosome...<br>Candidatus Carsonella 135557 - 167442nt<br>SARS-CoV-2 Reference Genome NC_045512.2 | (1849) | 1849                                                                           | 1859 | 1870 | 1881 | 1892 | 1903 | 1914 | 1925 |
|                                                                                                                                            | (1849) | TATTTATACCACCTTTTTCTGATAAAATAAAAAATTAAAAAATTATTATTAAAAAAAACGAAATATATAATTCATTT  |      |      |      |      |      |      |      |
|                                                                                                                                            | (1)    | -----                                                                          |      |      |      |      |      |      |      |
|                                                                                                                                            | (1)    | -----                                                                          |      |      |      |      |      |      |      |
| Section 26                                                                                                                                 |        |                                                                                |      |      |      |      |      |      |      |
| Candidatus Carsonella ruddii strain BT chromosome...<br>Candidatus Carsonella 135557 - 167442nt<br>SARS-CoV-2 Reference Genome NC_045512.2 | (1926) | 1926                                                                           | 1936 | 1947 | 1958 | 1969 | 1980 | 1991 | 2002 |
|                                                                                                                                            | (1926) | TCTATTAAAAATATAATTTTCAATTAAAAAATTTTAAATTTTTTTTTTAAATAAAAAAGAATTTTCCATTTTTTAA   |      |      |      |      |      |      |      |
|                                                                                                                                            | (1)    | -----                                                                          |      |      |      |      |      |      |      |
|                                                                                                                                            | (1)    | -----                                                                          |      |      |      |      |      |      |      |
| Section 27                                                                                                                                 |        |                                                                                |      |      |      |      |      |      |      |
| Candidatus Carsonella ruddii strain BT chromosome...<br>Candidatus Carsonella 135557 - 167442nt<br>SARS-CoV-2 Reference Genome NC_045512.2 | (2003) | 2003                                                                           | 2013 | 2024 | 2035 | 2046 | 2057 | 2068 | 2079 |
|                                                                                                                                            | (2003) | AAACGATAAACAATATTTAAAAGTGTTTATTAATAATTACACCATTATTTTTTTTCTATATCCGCTATGAACTTGTA  |      |      |      |      |      |      |      |
|                                                                                                                                            | (1)    | -----                                                                          |      |      |      |      |      |      |      |
|                                                                                                                                            | (1)    | -----                                                                          |      |      |      |      |      |      |      |
| Section 28                                                                                                                                 |        |                                                                                |      |      |      |      |      |      |      |
| Candidatus Carsonella ruddii strain BT chromosome...<br>Candidatus Carsonella 135557 - 167442nt<br>SARS-CoV-2 Reference Genome NC_045512.2 | (2080) | 2080                                                                           | 2090 | 2101 | 2112 | 2123 | 2134 | 2145 | 2156 |
|                                                                                                                                            | (2080) | TTTTATATATTTTGTTTTTAAAAAATAAATTTAACTAAATAAGAATTTAAATTTAAAAATTAATTTTCTT         |      |      |      |      |      |      |      |
|                                                                                                                                            | (1)    | -----                                                                          |      |      |      |      |      |      |      |
|                                                                                                                                            | (1)    | -----                                                                          |      |      |      |      |      |      |      |
| Section 29                                                                                                                                 |        |                                                                                |      |      |      |      |      |      |      |
| Candidatus Carsonella ruddii strain BT chromosome...<br>Candidatus Carsonella 135557 - 167442nt<br>SARS-CoV-2 Reference Genome NC_045512.2 | (2157) | 2157                                                                           | 2167 | 2178 | 2189 | 2200 | 2211 | 2222 | 2233 |
|                                                                                                                                            | (2157) | AAAATTTTTTTAGCTTCGTATTCATATAAATTCATATTTTTTTATTTTTAAAAATTAAAAATTTTCATTTTTTGAAAA |      |      |      |      |      |      |      |
|                                                                                                                                            | (1)    | -----                                                                          |      |      |      |      |      |      |      |
|                                                                                                                                            | (1)    | -----                                                                          |      |      |      |      |      |      |      |
| Section 30                                                                                                                                 |        |                                                                                |      |      |      |      |      |      |      |
| Candidatus Carsonella ruddii strain BT chromosome...<br>Candidatus Carsonella 135557 - 167442nt<br>SARS-CoV-2 Reference Genome NC_045512.2 | (2234) | 2234                                                                           | 2244 | 2255 | 2266 | 2277 | 2288 | 2299 | 2310 |
|                                                                                                                                            | (2234) | AAAAAATATTTTTTAATATTTTTTTAATATTTTTTGAAAAAATTTAAATTTGAAAAATCAATATTTAATTGTCTAAAA |      |      |      |      |      |      |      |
|                                                                                                                                            | (1)    | -----                                                                          |      |      |      |      |      |      |      |
|                                                                                                                                            | (1)    | -----                                                                          |      |      |      |      |      |      |      |

## SARS-CoV-2 &amp; Bakterien.apr

|                                                                                                                                            |        |                                                                                    |                      |                      |                      |                      |                      |                      |                      |
|--------------------------------------------------------------------------------------------------------------------------------------------|--------|------------------------------------------------------------------------------------|----------------------|----------------------|----------------------|----------------------|----------------------|----------------------|----------------------|
|                                                                                                                                            |        |                                                                                    |                      |                      |                      |                      |                      | Section 31           |                      |
| Candidatus Carsonella ruddii strain BT chromosome...<br>Candidatus Carsonella 135557 - 167442nt<br>SARS-CoV-2 Reference Genome NC_045512.2 | (2311) | <a href="#">2311</a>                                                               | <a href="#">2321</a> | <a href="#">2332</a> | <a href="#">2343</a> | <a href="#">2354</a> | <a href="#">2365</a> | <a href="#">2376</a> | <a href="#">2387</a> |
|                                                                                                                                            | (2311) | TGTTTTAAAAAATTTATTTTTTAATGAAATTAAATTATAAATTTCTTTAAAATTAGTATTTTTTAATTAAATAAATTAA    |                      |                      |                      |                      |                      |                      |                      |
|                                                                                                                                            | (1)    | -----                                                                              |                      |                      |                      |                      |                      |                      |                      |
|                                                                                                                                            | (1)    | -----                                                                              |                      |                      |                      |                      |                      |                      |                      |
|                                                                                                                                            |        |                                                                                    |                      |                      |                      |                      |                      | Section 32           |                      |
| Candidatus Carsonella ruddii strain BT chromosome...<br>Candidatus Carsonella 135557 - 167442nt<br>SARS-CoV-2 Reference Genome NC_045512.2 | (2388) | <a href="#">2388</a>                                                               | <a href="#">2398</a> | <a href="#">2409</a> | <a href="#">2420</a> | <a href="#">2431</a> | <a href="#">2442</a> | <a href="#">2453</a> | <a href="#">2464</a> |
|                                                                                                                                            | (2388) | ATTTATCATAATATAGTTATTTATTTTTTTAATATATTTCTTTTTTTTTCTATTATTAAATACTTTATATCTTTTA       |                      |                      |                      |                      |                      |                      |                      |
|                                                                                                                                            | (1)    | -----                                                                              |                      |                      |                      |                      |                      |                      |                      |
|                                                                                                                                            | (1)    | -----                                                                              |                      |                      |                      |                      |                      |                      |                      |
|                                                                                                                                            |        |                                                                                    |                      |                      |                      |                      |                      | Section 33           |                      |
| Candidatus Carsonella ruddii strain BT chromosome...<br>Candidatus Carsonella 135557 - 167442nt<br>SARS-CoV-2 Reference Genome NC_045512.2 | (2465) | <a href="#">2465</a>                                                               | <a href="#">2475</a> | <a href="#">2486</a> | <a href="#">2497</a> | <a href="#">2508</a> | <a href="#">2519</a> | <a href="#">2530</a> | <a href="#">2541</a> |
|                                                                                                                                            | (2465) | TACTATTTTAAAATTTTTTTTATTTTTTTAAAAAAAAAAAAAAAAATATTAATATTATTTATTAAATAAAAAATTTCTTTTT |                      |                      |                      |                      |                      |                      |                      |
|                                                                                                                                            | (1)    | -----                                                                              |                      |                      |                      |                      |                      |                      |                      |
|                                                                                                                                            | (1)    | -----                                                                              |                      |                      |                      |                      |                      |                      |                      |
|                                                                                                                                            |        |                                                                                    |                      |                      |                      |                      |                      | Section 34           |                      |
| Candidatus Carsonella ruddii strain BT chromosome...<br>Candidatus Carsonella 135557 - 167442nt<br>SARS-CoV-2 Reference Genome NC_045512.2 | (2542) | <a href="#">2542</a>                                                               | <a href="#">2552</a> | <a href="#">2563</a> | <a href="#">2574</a> | <a href="#">2585</a> | <a href="#">2596</a> | <a href="#">2607</a> | <a href="#">2618</a> |
|                                                                                                                                            | (2542) | GATAATTTTTTACCATTTAAATAATTAATGTTAGGTAAATGATTAAAAATTGAAAAAAAAATTATATTTTTTACATAA     |                      |                      |                      |                      |                      |                      |                      |
|                                                                                                                                            | (1)    | -----                                                                              |                      |                      |                      |                      |                      |                      |                      |
|                                                                                                                                            | (1)    | -----                                                                              |                      |                      |                      |                      |                      |                      |                      |
|                                                                                                                                            |        |                                                                                    |                      |                      |                      |                      |                      | Section 35           |                      |
| Candidatus Carsonella ruddii strain BT chromosome...<br>Candidatus Carsonella 135557 - 167442nt<br>SARS-CoV-2 Reference Genome NC_045512.2 | (2619) | <a href="#">2619</a>                                                               | <a href="#">2629</a> | <a href="#">2640</a> | <a href="#">2651</a> | <a href="#">2662</a> | <a href="#">2673</a> | <a href="#">2684</a> | <a href="#">2695</a> |
|                                                                                                                                            | (2619) | AAATAATTGAAAAGGAATTTGATTTAACCATTCTTTACCCCTTATAATAATAAGAGTATTATTATAATAATCATTA       |                      |                      |                      |                      |                      |                      |                      |
|                                                                                                                                            | (1)    | -----                                                                              |                      |                      |                      |                      |                      |                      |                      |
|                                                                                                                                            | (1)    | -----                                                                              |                      |                      |                      |                      |                      |                      |                      |
|                                                                                                                                            |        |                                                                                    |                      |                      |                      |                      |                      | Section 36           |                      |
| Candidatus Carsonella ruddii strain BT chromosome...<br>Candidatus Carsonella 135557 - 167442nt<br>SARS-CoV-2 Reference Genome NC_045512.2 | (2696) | <a href="#">2696</a>                                                               | <a href="#">2706</a> | <a href="#">2717</a> | <a href="#">2728</a> | <a href="#">2739</a> | <a href="#">2750</a> | <a href="#">2761</a> | <a href="#">2772</a> |
|                                                                                                                                            | (2696) | ATAATGTAGAAAAATTATATGTAGGTATACCTATTTTTTTAATTAAATTTGTTTTTCTAATTGTATTTTATAATTT       |                      |                      |                      |                      |                      |                      |                      |
|                                                                                                                                            | (1)    | -----                                                                              |                      |                      |                      |                      |                      |                      |                      |
|                                                                                                                                            | (1)    | -----                                                                              |                      |                      |                      |                      |                      |                      |                      |

## SARS-CoV-2 &amp; Bakterien.apr

|                                                                                                                                            |        |                                                                                 |             |             |             |             |             |             |             |
|--------------------------------------------------------------------------------------------------------------------------------------------|--------|---------------------------------------------------------------------------------|-------------|-------------|-------------|-------------|-------------|-------------|-------------|
|                                                                                                                                            |        |                                                                                 |             |             |             |             |             | Section 37  |             |
| Candidatus Carsonella ruddii strain BT chromosome...<br>Candidatus Carsonella 135557 - 167442nt<br>SARS-CoV-2 Reference Genome NC_045512.2 | (2773) | <u>2773</u>                                                                     | <u>2783</u> | <u>2794</u> | <u>2805</u> | <u>2816</u> | <u>2827</u> | <u>2838</u> | <u>2849</u> |
|                                                                                                                                            | (2773) | AATAAACCATTAATTATTATCAAAATAATTAATTTTACAATTTTTTTAAAATTATAAAAAAGAATAATTAATGTTTTT  |             |             |             |             |             |             |             |
|                                                                                                                                            | (1)    | -----                                                                           |             |             |             |             |             |             |             |
|                                                                                                                                            | (1)    | -----                                                                           |             |             |             |             |             |             |             |
|                                                                                                                                            |        |                                                                                 |             |             |             |             |             | Section 38  |             |
| Candidatus Carsonella ruddii strain BT chromosome...<br>Candidatus Carsonella 135557 - 167442nt<br>SARS-CoV-2 Reference Genome NC_045512.2 | (2850) | <u>2850</u>                                                                     | <u>2860</u> | <u>2871</u> | <u>2882</u> | <u>2893</u> | <u>2904</u> | <u>2915</u> | <u>2926</u> |
|                                                                                                                                            | (2850) | ATTTTTTATTTTATTGTTAAAAAATATTTTTTTTAAACTATTTTTTTTTTAAAATTAATAATATTTTTTATATATAAAC |             |             |             |             |             |             |             |
|                                                                                                                                            | (1)    | -----                                                                           |             |             |             |             |             |             |             |
|                                                                                                                                            | (1)    | -----                                                                           |             |             |             |             |             |             |             |
|                                                                                                                                            |        |                                                                                 |             |             |             |             |             | Section 39  |             |
| Candidatus Carsonella ruddii strain BT chromosome...<br>Candidatus Carsonella 135557 - 167442nt<br>SARS-CoV-2 Reference Genome NC_045512.2 | (2927) | <u>2927</u>                                                                     | <u>2937</u> | <u>2948</u> | <u>2959</u> | <u>2970</u> | <u>2981</u> | <u>2992</u> | <u>3003</u> |
|                                                                                                                                            | (2927) | TATTAAAATCTGTTTGCTTTTTTATTTTTTTAATAAAAAATACCATTATTTTTTAAATTTTTTAAATATAAAATTTA   |             |             |             |             |             |             |             |
|                                                                                                                                            | (1)    | -----                                                                           |             |             |             |             |             |             |             |
|                                                                                                                                            | (1)    | -----                                                                           |             |             |             |             |             |             |             |
|                                                                                                                                            |        |                                                                                 |             |             |             |             |             | Section 40  |             |
| Candidatus Carsonella ruddii strain BT chromosome...<br>Candidatus Carsonella 135557 - 167442nt<br>SARS-CoV-2 Reference Genome NC_045512.2 | (3004) | <u>3004</u>                                                                     | <u>3014</u> | <u>3025</u> | <u>3036</u> | <u>3047</u> | <u>3058</u> | <u>3069</u> | <u>3080</u> |
|                                                                                                                                            | (3004) | TTTATTAATTTATTTTTTTTTTTCATTTGTGTTATCAAATCTTAAAGTTATATTACCGATAATTTTATTTTTTAAAT   |             |             |             |             |             |             |             |
|                                                                                                                                            | (1)    | -----                                                                           |             |             |             |             |             |             |             |
|                                                                                                                                            | (1)    | -----                                                                           |             |             |             |             |             |             |             |
|                                                                                                                                            |        |                                                                                 |             |             |             |             |             | Section 41  |             |
| Candidatus Carsonella ruddii strain BT chromosome...<br>Candidatus Carsonella 135557 - 167442nt<br>SARS-CoV-2 Reference Genome NC_045512.2 | (3081) | <u>3081</u>                                                                     | <u>3091</u> | <u>3102</u> | <u>3113</u> | <u>3124</u> | <u>3135</u> | <u>3146</u> | <u>3157</u> |
|                                                                                                                                            | (3081) | ATAATTTGTTAATAACACATATATATTACCTATATGTGGTACTCCACTTGGAGTTATAGCAATTCTAAATTATACA    |             |             |             |             |             |             |             |
|                                                                                                                                            | (1)    | -----                                                                           |             |             |             |             |             |             |             |
|                                                                                                                                            | (1)    | -----                                                                           |             |             |             |             |             |             |             |
|                                                                                                                                            |        |                                                                                 |             |             |             |             |             | Section 42  |             |
| Candidatus Carsonella ruddii strain BT chromosome...<br>Candidatus Carsonella 135557 - 167442nt<br>SARS-CoV-2 Reference Genome NC_045512.2 | (3158) | <u>3158</u>                                                                     | <u>3168</u> | <u>3179</u> | <u>3190</u> | <u>3201</u> | <u>3212</u> | <u>3223</u> | <u>3234</u> |
|                                                                                                                                            | (3158) | TTTTTTTTTTTTTAAAAAATGGGTTTAGTAGGACTTGAACCTACAACCTAGAGGATTATGAGTCCTATACTCTAACCAA |             |             |             |             |             |             |             |
|                                                                                                                                            | (1)    | -----                                                                           |             |             |             |             |             |             |             |
|                                                                                                                                            | (1)    | -----                                                                           |             |             |             |             |             |             |             |

## SARS-CoV-2 &amp; Bakterien.apr

|                                                                                                                                            |        |                                                                                |      |      |      |      |      |            |      |
|--------------------------------------------------------------------------------------------------------------------------------------------|--------|--------------------------------------------------------------------------------|------|------|------|------|------|------------|------|
|                                                                                                                                            |        |                                                                                |      |      |      |      |      | Section 43 |      |
| Candidatus Carsonella ruddii strain BT chromosome...<br>Candidatus Carsonella 135557 - 167442nt<br>SARS-CoV-2 Reference Genome NC_045512.2 | (3235) | 3235                                                                           | 3245 | 3256 | 3267 | 3278 | 3289 | 3300       | 3311 |
|                                                                                                                                            | (3235) | TTGAGTTATAAACCCCTTTATAAATTTAATTTTTTAATAAATAATATTATTAAACAAAAAAATTAAATCATTGTTATC |      |      |      |      |      |            |      |
|                                                                                                                                            | (1)    | -----                                                                          |      |      |      |      |      |            |      |
|                                                                                                                                            | (1)    | -----                                                                          |      |      |      |      |      |            |      |
|                                                                                                                                            |        |                                                                                |      |      |      |      |      | Section 44 |      |
| Candidatus Carsonella ruddii strain BT chromosome...<br>Candidatus Carsonella 135557 - 167442nt<br>SARS-CoV-2 Reference Genome NC_045512.2 | (3312) | 3312                                                                           | 3322 | 3333 | 3344 | 3355 | 3366 | 3377       | 3388 |
|                                                                                                                                            | (3312) | ATAAATAATATAATATATATGAAAAAATTTTAATAACAACAGCTTTACCATATATTAATGGAGTTATACATATTGG   |      |      |      |      |      |            |      |
|                                                                                                                                            | (1)    | -----                                                                          |      |      |      |      |      |            |      |
|                                                                                                                                            | (1)    | -----                                                                          |      |      |      |      |      |            |      |
|                                                                                                                                            |        |                                                                                |      |      |      |      |      | Section 45 |      |
| Candidatus Carsonella ruddii strain BT chromosome...<br>Candidatus Carsonella 135557 - 167442nt<br>SARS-CoV-2 Reference Genome NC_045512.2 | (3389) | 3389                                                                           | 3399 | 3410 | 3421 | 3432 | 3443 | 3454       | 3465 |
|                                                                                                                                            | (3389) | GCATATTTATGAAATGTATATATCTAATATGTATTATTTATTATAAAAAAATATTATAATTGTAAAAATTTTTCTG   |      |      |      |      |      |            |      |
|                                                                                                                                            | (1)    | -----                                                                          |      |      |      |      |      |            |      |
|                                                                                                                                            | (1)    | -----                                                                          |      |      |      |      |      |            |      |
|                                                                                                                                            |        |                                                                                |      |      |      |      |      | Section 46 |      |
| Candidatus Carsonella ruddii strain BT chromosome...<br>Candidatus Carsonella 135557 - 167442nt<br>SARS-CoV-2 Reference Genome NC_045512.2 | (3466) | 3466                                                                           | 3476 | 3487 | 3498 | 3509 | 3520 | 3531       | 3542 |
|                                                                                                                                            | (3466) | GTTTAGATTGTCATGGTTTAATTAAAAATAATAATTTATTAAAAATTGAATTTTTTAATAAAAAAAAAAATTTTTTTT |      |      |      |      |      |            |      |
|                                                                                                                                            | (1)    | -----                                                                          |      |      |      |      |      |            |      |
|                                                                                                                                            | (1)    | -----                                                                          |      |      |      |      |      |            |      |
|                                                                                                                                            |        |                                                                                |      |      |      |      |      | Section 47 |      |
| Candidatus Carsonella ruddii strain BT chromosome...<br>Candidatus Carsonella 135557 - 167442nt<br>SARS-CoV-2 Reference Genome NC_045512.2 | (3543) | 3543                                                                           | 3553 | 3564 | 3575 | 3586 | 3597 | 3608       | 3619 |
|                                                                                                                                            | (3543) | TATAATTTAAATTAATCAAAAAAACTATTTCTTTTATTAATAAAAGATTTTGTAATTGGGTTTTTATATTATT      |      |      |      |      |      |            |      |
|                                                                                                                                            | (1)    | -----                                                                          |      |      |      |      |      |            |      |
|                                                                                                                                            | (1)    | -----                                                                          |      |      |      |      |      |            |      |
|                                                                                                                                            |        |                                                                                |      |      |      |      |      | Section 48 |      |
| Candidatus Carsonella ruddii strain BT chromosome...<br>Candidatus Carsonella 135557 - 167442nt<br>SARS-CoV-2 Reference Genome NC_045512.2 | (3620) | 3620                                                                           | 3630 | 3641 | 3652 | 3663 | 3674 | 3685       | 3696 |
|                                                                                                                                            | (3620) | ATCAGATAAAAATAAAATATTTAGTAAATTACTTATAAATTTTTTAATAAAAAAAAAAATTTTTTTATACCTGATA   |      |      |      |      |      |            |      |
|                                                                                                                                            | (1)    | -----                                                                          |      |      |      |      |      |            |      |
|                                                                                                                                            | (1)    | -----                                                                          |      |      |      |      |      |            |      |



## SARS-CoV-2 &amp; Bakterien.apr

|                                                                                                                                            |        |                                                                                 |      |      |      |      |      |      |            |
|--------------------------------------------------------------------------------------------------------------------------------------------|--------|---------------------------------------------------------------------------------|------|------|------|------|------|------|------------|
|                                                                                                                                            |        |                                                                                 |      |      |      |      |      |      | Section 49 |
| Candidatus Carsonella ruddii strain BT chromosome...<br>Candidatus Carsonella 135557 - 167442nt<br>SARS-CoV-2 Reference Genome NC_045512.2 | (3697) | 3697                                                                            | 3707 | 3718 | 3729 | 3740 | 3751 | 3762 | 3773       |
|                                                                                                                                            | (3697) | AATATATAAAAAATATTATGTAAAAAATGTAATTTTGAAATGGAAAATTTTTATTGTACAAATTGTTTATATTATAAA  |      |      |      |      |      |      |            |
|                                                                                                                                            | (1)    | -----                                                                           |      |      |      |      |      |      |            |
|                                                                                                                                            | (1)    | -----                                                                           |      |      |      |      |      |      |            |
|                                                                                                                                            |        |                                                                                 |      |      |      |      |      |      | Section 50 |
| Candidatus Carsonella ruddii strain BT chromosome...<br>Candidatus Carsonella 135557 - 167442nt<br>SARS-CoV-2 Reference Genome NC_045512.2 | (3774) | 3774                                                                            | 3784 | 3795 | 3806 | 3817 | 3828 | 3839 | 3850       |
|                                                                                                                                            | (3774) | AAATTTTATATTGTTTCAAAATTTAAAAAAAAAAAAATATAAAATTAAAAAAAAATAATAGCATTTTTTTAAAAAATTA |      |      |      |      |      |      |            |
|                                                                                                                                            | (1)    | -----                                                                           |      |      |      |      |      |      |            |
|                                                                                                                                            | (1)    | -----                                                                           |      |      |      |      |      |      |            |
|                                                                                                                                            |        |                                                                                 |      |      |      |      |      |      | Section 51 |
| Candidatus Carsonella ruddii strain BT chromosome...<br>Candidatus Carsonella 135557 - 167442nt<br>SARS-CoV-2 Reference Genome NC_045512.2 | (3851) | 3851                                                                            | 3861 | 3872 | 3883 | 3894 | 3905 | 3916 | 3927       |
|                                                                                                                                            | (3851) | TATTTTTAAAGATTGGGATATTTCAAGATATAAAAAATATAATGGTTTTAAATTTATATCAAAAAAAAAAATTTTTT   |      |      |      |      |      |      |            |
|                                                                                                                                            | (1)    | -----                                                                           |      |      |      |      |      |      |            |
|                                                                                                                                            | (1)    | -----                                                                           |      |      |      |      |      |      |            |
|                                                                                                                                            |        |                                                                                 |      |      |      |      |      |      | Section 52 |
| Candidatus Carsonella ruddii strain BT chromosome...<br>Candidatus Carsonella 135557 - 167442nt<br>SARS-CoV-2 Reference Genome NC_045512.2 | (3928) | 3928                                                                            | 3938 | 3949 | 3960 | 3971 | 3982 | 3993 | 4004       |
|                                                                                                                                            | (3928) | TTTATGTTTGGTATGATGCTATTATAAGTTATATTTCTAATAATTTAAATTTTATAAAAAATAATTTTTATAATTTT   |      |      |      |      |      |      |            |
|                                                                                                                                            | (1)    | -----                                                                           |      |      |      |      |      |      |            |
|                                                                                                                                            | (1)    | -----                                                                           |      |      |      |      |      |      |            |
|                                                                                                                                            |        |                                                                                 |      |      |      |      |      |      | Section 53 |
| Candidatus Carsonella ruddii strain BT chromosome...<br>Candidatus Carsonella 135557 - 167442nt<br>SARS-CoV-2 Reference Genome NC_045512.2 | (4005) | 4005                                                                            | 4015 | 4026 | 4037 | 4048 | 4059 | 4070 | 4081       |
|                                                                                                                                            | (4005) | GTTTTTTTCCAAATTATTGGTAAAGATATTATTTATTTTCATAAATTATTTTATATAATTTTAAAAATTTTAAATTT   |      |      |      |      |      |      |            |
|                                                                                                                                            | (1)    | -----                                                                           |      |      |      |      |      |      |            |
|                                                                                                                                            | (1)    | -----                                                                           |      |      |      |      |      |      |            |
|                                                                                                                                            |        |                                                                                 |      |      |      |      |      |      | Section 54 |
| Candidatus Carsonella ruddii strain BT chromosome...<br>Candidatus Carsonella 135557 - 167442nt<br>SARS-CoV-2 Reference Genome NC_045512.2 | (4082) | 4082                                                                            | 4092 | 4103 | 4114 | 4125 | 4136 | 4147 | 4158       |
|                                                                                                                                            | (4082) | TAAAAAATATAATTTTTTAATTCATGGTTTTATTTTTTATAATAACAAAATTTCTAAATCTAAAATAATTAAATTA    |      |      |      |      |      |      |            |
|                                                                                                                                            | (1)    | -----                                                                           |      |      |      |      |      |      |            |
|                                                                                                                                            | (1)    | -----                                                                           |      |      |      |      |      |      |            |

## SARS-CoV-2 &amp; Bakterien.apr

|                                                                                                                                            |        |                                                                                    |      |      |      |      |      |            |      |
|--------------------------------------------------------------------------------------------------------------------------------------------|--------|------------------------------------------------------------------------------------|------|------|------|------|------|------------|------|
|                                                                                                                                            |        |                                                                                    |      |      |      |      |      | Section 55 |      |
| Candidatus Carsonella ruddii strain BT chromosome...<br>Candidatus Carsonella 135557 - 167442nt<br>SARS-CoV-2 Reference Genome NC_045512.2 | (4159) | 4159                                                                               | 4169 | 4180 | 4191 | 4202 | 4213 | 4224       | 4235 |
|                                                                                                                                            | (4159) | AGAAAAATAAAAAAAAAATAAATTGTTATTTTTTTTTTTTAAATTAATAATAAAAAATTATAAAGAAGATATACATTATGAT |      |      |      |      |      |            |      |
|                                                                                                                                            | (1)    | -----                                                                              |      |      |      |      |      |            |      |
|                                                                                                                                            | (1)    | -----                                                                              |      |      |      |      |      |            |      |
|                                                                                                                                            |        |                                                                                    |      |      |      |      |      | Section 56 |      |
| Candidatus Carsonella ruddii strain BT chromosome...<br>Candidatus Carsonella 135557 - 167442nt<br>SARS-CoV-2 Reference Genome NC_045512.2 | (4236) | 4236                                                                               | 4246 | 4257 | 4268 | 4279 | 4290 | 4301       | 4312 |
|                                                                                                                                            | (4236) | TATCTATTAATTAATAATTATTATAAAAAAATTTTTTTTAAATAAAATTTTAAATTTATTTTTTTAGAATAAGAACAAT    |      |      |      |      |      |            |      |
|                                                                                                                                            | (1)    | -----                                                                              |      |      |      |      |      |            |      |
|                                                                                                                                            | (1)    | -----                                                                              |      |      |      |      |      |            |      |
|                                                                                                                                            |        |                                                                                    |      |      |      |      |      | Section 57 |      |
| Candidatus Carsonella ruddii strain BT chromosome...<br>Candidatus Carsonella 135557 - 167442nt<br>SARS-CoV-2 Reference Genome NC_045512.2 | (4313) | 4313                                                                               | 4323 | 4334 | 4345 | 4356 | 4367 | 4378       | 4389 |
|                                                                                                                                            | (4313) | TTTAAAAAATATGATAATAAAATTATTGATTTTTTTTAAATTTAAAAAATCATTTTTATGAATTTAATTTTTTAA        |      |      |      |      |      |            |      |
|                                                                                                                                            | (1)    | -----                                                                              |      |      |      |      |      |            |      |
|                                                                                                                                            | (1)    | -----                                                                              |      |      |      |      |      |            |      |
|                                                                                                                                            |        |                                                                                    |      |      |      |      |      | Section 58 |      |
| Candidatus Carsonella ruddii strain BT chromosome...<br>Candidatus Carsonella 135557 - 167442nt<br>SARS-CoV-2 Reference Genome NC_045512.2 | (4390) | 4390                                                                               | 4400 | 4411 | 4422 | 4433 | 4444 | 4455       | 4466 |
|                                                                                                                                            | (4390) | AAAAAAAAAATTAAACAATTTTTATTATAAAAAAATAAAAAATATATTAAATATAAACAAAAATATAAATAAAAAAT      |      |      |      |      |      |            |      |
|                                                                                                                                            | (1)    | -----                                                                              |      |      |      |      |      |            |      |
|                                                                                                                                            | (1)    | -----                                                                              |      |      |      |      |      |            |      |
|                                                                                                                                            |        |                                                                                    |      |      |      |      |      | Section 59 |      |
| Candidatus Carsonella ruddii strain BT chromosome...<br>Candidatus Carsonella 135557 - 167442nt<br>SARS-CoV-2 Reference Genome NC_045512.2 | (4467) | 4467                                                                               | 4477 | 4488 | 4499 | 4510 | 4521 | 4532       | 4543 |
|                                                                                                                                            | (4467) | AAATTTTGGAAAAAAAAAATAATTTTTTAAATTCATTTTTATTATTCAAAAAATATTTTTTTTTTATATAAAAAATTT     |      |      |      |      |      |            |      |
|                                                                                                                                            | (1)    | -----                                                                              |      |      |      |      |      |            |      |
|                                                                                                                                            | (1)    | -----                                                                              |      |      |      |      |      |            |      |
|                                                                                                                                            |        |                                                                                    |      |      |      |      |      | Section 60 |      |
| Candidatus Carsonella ruddii strain BT chromosome...<br>Candidatus Carsonella 135557 - 167442nt<br>SARS-CoV-2 Reference Genome NC_045512.2 | (4544) | 4544                                                                               | 4554 | 4565 | 4576 | 4587 | 4598 | 4609       | 4620 |
|                                                                                                                                            | (4544) | AAATATTTTAAATTGAAATAATTAACAATAAAATTATTAAAAACAATTTATATAAAAAATTGTAAATATTTAATTTAA     |      |      |      |      |      |            |      |
|                                                                                                                                            | (1)    | -----                                                                              |      |      |      |      |      |            |      |
|                                                                                                                                            | (1)    | -----                                                                              |      |      |      |      |      |            |      |

## SARS-CoV-2 &amp; Bakterien.apr

|                                                      |        |                                                                                |      |      |      |      |      |      |      |
|------------------------------------------------------|--------|--------------------------------------------------------------------------------|------|------|------|------|------|------|------|
|                                                      |        | Section 61                                                                     |      |      |      |      |      |      |      |
| Candidatus Carsonella ruddii strain BT chromosome... | (4621) | 4621                                                                           | 4631 | 4642 | 4653 | 4664 | 4675 | 4686 | 4697 |
|                                                      | (4621) | AAAAAATTAATGAAATTTAAAAATTTTATTTTATATAATATTAAAAAAATATTAAAACTGTATAAATTGTAATTT    |      |      |      |      |      |      |      |
|                                                      | (1)    | -----                                                                          |      |      |      |      |      |      |      |
|                                                      | (1)    | -----                                                                          |      |      |      |      |      |      |      |
|                                                      |        | Section 62                                                                     |      |      |      |      |      |      |      |
| Candidatus Carsonella ruddii strain BT chromosome... | (4698) | 4698                                                                           | 4708 | 4719 | 4730 | 4741 | 4752 | 4763 | 4774 |
|                                                      | (4698) | TTGTATATTTTTTTGTCCAAAATTTAAATTAACAAAAAAAAAATAAAATAAAATTAATAATTTTGTAT           |      |      |      |      |      |      |      |
|                                                      | (1)    | -----                                                                          |      |      |      |      |      |      |      |
|                                                      | (1)    | -----                                                                          |      |      |      |      |      |      |      |
|                                                      |        | Section 63                                                                     |      |      |      |      |      |      |      |
| Candidatus Carsonella ruddii strain BT chromosome... | (4775) | 4775                                                                           | 4785 | 4796 | 4807 | 4818 | 4829 | 4840 | 4851 |
|                                                      | (4775) | ATTATTGTAATATTTTTTTGTAAAATTAATTGTATTAAATAATTAATCTTAACTATTAATATTTATAAAACCTTGAG  |      |      |      |      |      |      |      |
|                                                      | (1)    | -----                                                                          |      |      |      |      |      |      |      |
|                                                      | (1)    | -----                                                                          |      |      |      |      |      |      |      |
|                                                      |        | Section 64                                                                     |      |      |      |      |      |      |      |
| Candidatus Carsonella ruddii strain BT chromosome... | (4852) | 4852                                                                           | 4862 | 4873 | 4884 | 4895 | 4906 | 4917 | 4928 |
|                                                      | (4852) | AATCAATTTGTTCAAATTTTTTGCTAATTTTCATCAAAAGAAGAATTTTTTTTATCATATAAAGAATTAAAAGAATAT |      |      |      |      |      |      |      |
|                                                      | (1)    | -----                                                                          |      |      |      |      |      |      |      |
|                                                      | (1)    | -----                                                                          |      |      |      |      |      |      |      |
|                                                      |        | Section 65                                                                     |      |      |      |      |      |      |      |
| Candidatus Carsonella ruddii strain BT chromosome... | (4929) | 4929                                                                           | 4939 | 4950 | 4961 | 4972 | 4983 | 4994 | 5005 |
|                                                      | (4929) | CTATTTACAATAGTAATACATCCTTTATAAATTTTTATTTTAATAATACCATTTAAATATTTTTGTATATTATTAT   |      |      |      |      |      |      |      |
|                                                      | (1)    | -----                                                                          |      |      |      |      |      |      |      |
|                                                      | (1)    | -----                                                                          |      |      |      |      |      |      |      |
|                                                      |        | Section 66                                                                     |      |      |      |      |      |      |      |
| Candidatus Carsonella ruddii strain BT chromosome... | (5006) | 5006                                                                           | 5016 | 5027 | 5038 | 5049 | 5060 | 5071 | 5082 |
|                                                      | (5006) | AATATTTTGAATTAAATTCCTTTAGGCGACCACCAATAACCATTGTAACTAAATTTGTATATTTTATTGATAAAG    |      |      |      |      |      |      |      |
|                                                      | (1)    | -----                                                                          |      |      |      |      |      |      |      |
|                                                      | (1)    | -----                                                                          |      |      |      |      |      |      |      |

## SARS-CoV-2 &amp; Bakterien.apr

|                                                      |        |                                                                                  |      |      |      |      |      |      |            |
|------------------------------------------------------|--------|----------------------------------------------------------------------------------|------|------|------|------|------|------|------------|
|                                                      |        |                                                                                  |      |      |      |      |      |      | Section 67 |
|                                                      | (5083) | 5083                                                                             | 5093 | 5104 | 5115 | 5126 | 5137 | 5148 | 5159       |
| Candidatus Carsonella ruddii strain BT chromosome... | (5083) | ATTCTTTAAAAAAAATATTTCTTTATCTAATACAAAACCTTTCTAAATGTTTTCTAGAAAACATTATTATTGTTGCA    |      |      |      |      |      |      |            |
| Candidatus Carsonella 135557 - 167442nt              | (1)    | -----                                                                            |      |      |      |      |      |      |            |
| SARS-CoV-2 Reference Genome NC_045512.2              | (1)    | -----                                                                            |      |      |      |      |      |      |            |
|                                                      |        |                                                                                  |      |      |      |      |      |      | Section 68 |
|                                                      | (5160) | 5160                                                                             | 5170 | 5181 | 5192 | 5203 | 5214 | 5225 | 5236       |
| Candidatus Carsonella ruddii strain BT chromosome... | (5160) | CCTGGTGATTTCATAACATCCTCTAGATTTTATTCCTATATATCTATTTTCTATTATATCTATTCTACCAATACCACA   |      |      |      |      |      |      |            |
| Candidatus Carsonella 135557 - 167442nt              | (1)    | -----                                                                            |      |      |      |      |      |      |            |
| SARS-CoV-2 Reference Genome NC_045512.2              | (1)    | -----                                                                            |      |      |      |      |      |      |            |
|                                                      |        |                                                                                  |      |      |      |      |      |      | Section 69 |
|                                                      | (5237) | 5237                                                                             | 5247 | 5258 | 5269 | 5280 | 5291 | 5302 | 5313       |
| Candidatus Carsonella ruddii strain BT chromosome... | (5237) | AATTGATCCAATTTTATTTAATTTTAAAAATAAAATTTTCATTATTATAAAAAATTATTATTTATTTTAATTGGATCAC  |      |      |      |      |      |      |            |
| Candidatus Carsonella 135557 - 167442nt              | (1)    | -----                                                                            |      |      |      |      |      |      |            |
| SARS-CoV-2 Reference Genome NC_045512.2              | (1)    | -----                                                                            |      |      |      |      |      |      |            |
|                                                      |        |                                                                                  |      |      |      |      |      |      | Section 70 |
|                                                      | (5314) | 5314                                                                             | 5324 | 5335 | 5346 | 5357 | 5368 | 5379 | 5390       |
| Candidatus Carsonella ruddii strain BT chromosome... | (5314) | CATTTTTTAAAAGTTATAGATAAAATAAATTGGATAATCAATACTAATTTTCATTACTTAAAGTATTTTCCCACATATTT |      |      |      |      |      |      |            |
| Candidatus Carsonella 135557 - 167442nt              | (1)    | -----                                                                            |      |      |      |      |      |      |            |
| SARS-CoV-2 Reference Genome NC_045512.2              | (1)    | -----                                                                            |      |      |      |      |      |      |            |
|                                                      |        |                                                                                  |      |      |      |      |      |      | Section 71 |
|                                                      | (5391) | 5391                                                                             | 5401 | 5412 | 5423 | 5434 | 5445 | 5456 | 5467       |
| Candidatus Carsonella ruddii strain BT chromosome... | (5391) | TCTTCAGCTTCAAATAATAAATTATCCAATTCACCTCCTTCATAAGAATTATGAAATAAATTTTATCTATAGAATA     |      |      |      |      |      |      |            |
| Candidatus Carsonella 135557 - 167442nt              | (1)    | -----                                                                            |      |      |      |      |      |      |            |
| SARS-CoV-2 Reference Genome NC_045512.2              | (1)    | -----                                                                            |      |      |      |      |      |      |            |
|                                                      |        |                                                                                  |      |      |      |      |      |      | Section 72 |
|                                                      | (5468) | 5468                                                                             | 5478 | 5489 | 5500 | 5511 | 5522 | 5533 | 5544       |
| Candidatus Carsonella ruddii strain BT chromosome... | (5468) | TTTTTTTGTTTTTTTATTAATTTTAAATATTATTTTAAATACAAAATCTAATAATTTATTTCTTGAATTTAAATCCC    |      |      |      |      |      |      |            |
| Candidatus Carsonella 135557 - 167442nt              | (1)    | -----                                                                            |      |      |      |      |      |      |            |
| SARS-CoV-2 Reference Genome NC_045512.2              | (1)    | -----                                                                            |      |      |      |      |      |      |            |

## SARS-CoV-2 &amp; Bakterien.apr

|                                                      |        |                                                                                   |      |      |      |      |      |            |      |
|------------------------------------------------------|--------|-----------------------------------------------------------------------------------|------|------|------|------|------|------------|------|
|                                                      |        |                                                                                   |      |      |      |      |      | Section 73 |      |
|                                                      | (5545) | 5545                                                                              | 5555 | 5566 | 5577 | 5588 | 5599 | 5610       | 5621 |
| Candidatus Carsonella ruddii strain BT chromosome... | (5545) | AAATTCTCCATGGTGCTATAACTTTAATATTTGAATTAAAATATTTAAAACCTAATTCAAACGAATTTGGTCATTT      |      |      |      |      |      |            |      |
| Candidatus Carsonella 135557 - 167442nt              | (1)    | -----                                                                             |      |      |      |      |      |            |      |
| SARS-CoV-2 Reference Genome NC_045512.2              | (1)    | -----                                                                             |      |      |      |      |      |            |      |
|                                                      |        |                                                                                   |      |      |      |      |      | Section 74 |      |
|                                                      | (5622) | 5622                                                                              | 5632 | 5643 | 5654 | 5665 | 5676 | 5687       | 5698 |
| Candidatus Carsonella ruddii strain BT chromosome... | (5622) | CCCTTTCCTGTTGCTCCATGTGCAACGTAATTAGAATTAGTATAATAAGCAATTTTCATAATTTCTTTAGAAATTAA     |      |      |      |      |      |            |      |
| Candidatus Carsonella 135557 - 167442nt              | (1)    | -----                                                                             |      |      |      |      |      |            |      |
| SARS-CoV-2 Reference Genome NC_045512.2              | (1)    | -----                                                                             |      |      |      |      |      |            |      |
|                                                      |        |                                                                                   |      |      |      |      |      | Section 75 |      |
|                                                      | (5699) | 5699                                                                              | 5709 | 5720 | 5731 | 5742 | 5753 | 5764       | 5775 |
| Candidatus Carsonella ruddii strain BT chromosome... | (5699) | AGGTCTAGCAATTGCTGTACCTAATAAATAAAAAATTTTCATATAAAAAACTAGATCTTAAATATGGAAAAACGTAAT    |      |      |      |      |      |            |      |
| Candidatus Carsonella 135557 - 167442nt              | (1)    | -----                                                                             |      |      |      |      |      |            |      |
| SARS-CoV-2 Reference Genome NC_045512.2              | (1)    | -----                                                                             |      |      |      |      |      |            |      |
|                                                      |        |                                                                                   |      |      |      |      |      | Section 76 |      |
|                                                      | (5776) | 5776                                                                              | 5786 | 5797 | 5808 | 5819 | 5830 | 5841       | 5852 |
| Candidatus Carsonella ruddii strain BT chromosome... | (5776) | TTTTAATAAATTCATTTTTTTAAATTTTTTAATAAAAAATATTTTTTAACATTTAATTTTTTTGCTCTTTCTTTAGCAATT |      |      |      |      |      |            |      |
| Candidatus Carsonella 135557 - 167442nt              | (1)    | -----                                                                             |      |      |      |      |      |            |      |
| SARS-CoV-2 Reference Genome NC_045512.2              | (1)    | -----                                                                             |      |      |      |      |      |            |      |
|                                                      |        |                                                                                   |      |      |      |      |      | Section 77 |      |
|                                                      | (5853) | 5853                                                                              | 5863 | 5874 | 5885 | 5896 | 5907 | 5918       | 5929 |
| Candidatus Carsonella ruddii strain BT chromosome... | (5853) | TTAATTTTCGTCTCCTTGACCTATATCAGCAGTAAATGTTATAACTTCAAATTTTGTTCCTTGTAACCATTTAATTAT    |      |      |      |      |      |            |      |
| Candidatus Carsonella 135557 - 167442nt              | (1)    | -----                                                                             |      |      |      |      |      |            |      |
| SARS-CoV-2 Reference Genome NC_045512.2              | (1)    | -----                                                                             |      |      |      |      |      |            |      |
|                                                      |        |                                                                                   |      |      |      |      |      | Section 78 |      |
|                                                      | (5930) | 5930                                                                              | 5940 | 5951 | 5962 | 5973 | 5984 | 5995       | 6006 |
| Candidatus Carsonella ruddii strain BT chromosome... | (5930) | AACTGAAGTATCTAATCCTCCAGAATAAGCTAATACAATTTTTTTTTTTTATCATATTGACATTTATATATAATAATA    |      |      |      |      |      |            |      |
| Candidatus Carsonella 135557 - 167442nt              | (1)    | -----                                                                             |      |      |      |      |      |            |      |
| SARS-CoV-2 Reference Genome NC_045512.2              | (1)    | -----                                                                             |      |      |      |      |      |            |      |

## SARS-CoV-2 &amp; Bakterien.apr

|                                                      |        |                                                                                 |      |      |      |      |      |            |      |
|------------------------------------------------------|--------|---------------------------------------------------------------------------------|------|------|------|------|------|------------|------|
|                                                      |        |                                                                                 |      |      |      |      |      | Section 79 |      |
|                                                      | (6007) | 6007                                                                            | 6017 | 6028 | 6039 | 6050 | 6061 | 6072       | 6083 |
| Candidatus Carsonella ruddii strain BT chromosome... | (6007) | TAAAATAATTAGGCTAAATAACATATTGGATATGTAATGGGTTGCAAACCCGTATAAACTGGTTCGATTCCAGTTTT   |      |      |      |      |      |            |      |
| Candidatus Carsonella 135557 - 167442nt              | (1)    | -----                                                                           |      |      |      |      |      |            |      |
| SARS-CoV-2 Reference Genome NC_045512.2              | (1)    | -----                                                                           |      |      |      |      |      |            |      |
|                                                      |        |                                                                                 |      |      |      |      |      | Section 80 |      |
|                                                      | (6084) | 6084                                                                            | 6094 | 6105 | 6116 | 6127 | 6138 | 6149       | 6160 |
| Candidatus Carsonella ruddii strain BT chromosome... | (6084) | AGCTTAATAAAAAATGCCCATATGGCGGAATGGTAGACGCAAGGGACTTAAAAATCCCTAGTTGAAAAACGTGTCAGTT |      |      |      |      |      |            |      |
| Candidatus Carsonella 135557 - 167442nt              | (1)    | -----                                                                           |      |      |      |      |      |            |      |
| SARS-CoV-2 Reference Genome NC_045512.2              | (1)    | -----                                                                           |      |      |      |      |      |            |      |
|                                                      |        |                                                                                 |      |      |      |      |      | Section 81 |      |
|                                                      | (6161) | 6161                                                                            | 6171 | 6182 | 6193 | 6204 | 6215 | 6226       | 6237 |
| Candidatus Carsonella ruddii strain BT chromosome... | (6161) | CAAGTCTGACTTTGGGTAAAGTAAAATTTTTCTACACCAAATAATAATGAATTAAAAATTCCTTTTATTAAAAAAC    |      |      |      |      |      |            |      |
| Candidatus Carsonella 135557 - 167442nt              | (1)    | -----                                                                           |      |      |      |      |      |            |      |
| SARS-CoV-2 Reference Genome NC_045512.2              | (1)    | -----                                                                           |      |      |      |      |      |            |      |
|                                                      |        |                                                                                 |      |      |      |      |      | Section 82 |      |
|                                                      | (6238) | 6238                                                                            | 6248 | 6259 | 6270 | 6281 | 6292 | 6303       | 6314 |
| Candidatus Carsonella ruddii strain BT chromosome... | (6238) | TTTGTTATAAAAAAATTTTATCAAAATAGGATTAATATGAAAATTTAATTTATTAATTAAAAAATTTAATTTTTTGT   |      |      |      |      |      |            |      |
| Candidatus Carsonella 135557 - 167442nt              | (1)    | -----                                                                           |      |      |      |      |      |            |      |
| SARS-CoV-2 Reference Genome NC_045512.2              | (1)    | -----                                                                           |      |      |      |      |      |            |      |
|                                                      |        |                                                                                 |      |      |      |      |      | Section 83 |      |
|                                                      | (6315) | 6315                                                                            | 6325 | 6336 | 6347 | 6358 | 6369 | 6380       | 6391 |
| Candidatus Carsonella ruddii strain BT chromosome... | (6315) | TTATAAAAAAATTTCTAGGTATAATATTGTTAAAAACAGATATTGTACCATAATAATTATTTTTTAAACAAAAT      |      |      |      |      |      |            |      |
| Candidatus Carsonella 135557 - 167442nt              | (1)    | -----                                                                           |      |      |      |      |      |            |      |
| SARS-CoV-2 Reference Genome NC_045512.2              | (1)    | -----                                                                           |      |      |      |      |      |            |      |
|                                                      |        |                                                                                 |      |      |      |      |      | Section 84 |      |
|                                                      | (6392) | 6392                                                                            | 6402 | 6413 | 6424 | 6435 | 6446 | 6457       | 6468 |
| Candidatus Carsonella ruddii strain BT chromosome... | (6392) | AATAAATTTTTATCTTCTCCAGAAAATAAAATTATATTTTTATTTTTATATATCAAAGTGTTTTTAATATTATTAT    |      |      |      |      |      |            |      |
| Candidatus Carsonella 135557 - 167442nt              | (1)    | -----                                                                           |      |      |      |      |      |            |      |
| SARS-CoV-2 Reference Genome NC_045512.2              | (1)    | -----                                                                           |      |      |      |      |      |            |      |

|                                                                                                                                            |        |                                                                                  |      |      |      |      |      |      |            |
|--------------------------------------------------------------------------------------------------------------------------------------------|--------|----------------------------------------------------------------------------------|------|------|------|------|------|------|------------|
|                                                                                                                                            |        |                                                                                  |      |      |      |      |      |      | Section 85 |
| Candidatus Carsonella ruddii strain BT chromosome...<br>Candidatus Carsonella 135557 - 167442nt<br>SARS-CoV-2 Reference Genome NC_045512.2 | (6469) | 6469                                                                             | 6479 | 6490 | 6501 | 6512 | 6523 | 6534 | 6545       |
|                                                                                                                                            | (6469) | AGAATTTTTCATATAAAATTAAAAAATTTTTTTTAAATAATTTATTAATAATATTATAATTTAAAAATAATATTATTTTC |      |      |      |      |      |      |            |
|                                                                                                                                            | (1)    | -----                                                                            |      |      |      |      |      |      |            |
|                                                                                                                                            | (1)    | -----                                                                            |      |      |      |      |      |      |            |
|                                                                                                                                            |        |                                                                                  |      |      |      |      |      |      | Section 86 |
| Candidatus Carsonella ruddii strain BT chromosome...<br>Candidatus Carsonella 135557 - 167442nt<br>SARS-CoV-2 Reference Genome NC_045512.2 | (6546) | 6546                                                                             | 6556 | 6567 | 6578 | 6589 | 6600 | 6611 | 6622       |
|                                                                                                                                            | (6546) | TTTTTGGTATATTATATAATATATTTTTTTAAACCAAATTTATTAATTTATTTTAAAAATATTTAAATAAATTTAAATTA |      |      |      |      |      |      |            |
|                                                                                                                                            | (1)    | -----                                                                            |      |      |      |      |      |      |            |
|                                                                                                                                            | (1)    | -----                                                                            |      |      |      |      |      |      |            |
|                                                                                                                                            |        |                                                                                  |      |      |      |      |      |      | Section 87 |
| Candidatus Carsonella ruddii strain BT chromosome...<br>Candidatus Carsonella 135557 - 167442nt<br>SARS-CoV-2 Reference Genome NC_045512.2 | (6623) | 6623                                                                             | 6633 | 6644 | 6655 | 6666 | 6677 | 6688 | 6699       |
|                                                                                                                                            | (6623) | TTAATTAAAAATATAATTTGGTATATTAATTAATACTTTAATATTATTATTTATTTTAAATAAAAAAATAAATAAAA    |      |      |      |      |      |      |            |
|                                                                                                                                            | (1)    | -----                                                                            |      |      |      |      |      |      |            |
|                                                                                                                                            | (1)    | -----                                                                            |      |      |      |      |      |      |            |
|                                                                                                                                            |        |                                                                                  |      |      |      |      |      |      | Section 88 |
| Candidatus Carsonella ruddii strain BT chromosome...<br>Candidatus Carsonella 135557 - 167442nt<br>SARS-CoV-2 Reference Genome NC_045512.2 | (6700) | 6700                                                                             | 6710 | 6721 | 6732 | 6743 | 6754 | 6765 | 6776       |
|                                                                                                                                            | (6700) | AATTTTTTTTAATGTTAATTTTATTTATATTAAAAAATTTAATATTATATTTTTTTAATATATAATAAGATATTTA     |      |      |      |      |      |      |            |
|                                                                                                                                            | (1)    | -----                                                                            |      |      |      |      |      |      |            |
|                                                                                                                                            | (1)    | -----                                                                            |      |      |      |      |      |      |            |
|                                                                                                                                            |        |                                                                                  |      |      |      |      |      |      | Section 89 |
| Candidatus Carsonella ruddii strain BT chromosome...<br>Candidatus Carsonella 135557 - 167442nt<br>SARS-CoV-2 Reference Genome NC_045512.2 | (6777) | 6777                                                                             | 6787 | 6798 | 6809 | 6820 | 6831 | 6842 | 6853       |
|                                                                                                                                            | (6777) | TATAATCTTTTGTTTTAAATTTATGAGATTCACCTGTTGTACCTAAAAATAAAAAATTTTAAATTTTGTTAAAAATA    |      |      |      |      |      |      |            |
|                                                                                                                                            | (1)    | -----                                                                            |      |      |      |      |      |      |            |
|                                                                                                                                            | (1)    | -----                                                                            |      |      |      |      |      |      |            |
|                                                                                                                                            |        |                                                                                  |      |      |      |      |      |      | Section 90 |
| Candidatus Carsonella ruddii strain BT chromosome...<br>Candidatus Carsonella 135557 - 167442nt<br>SARS-CoV-2 Reference Genome NC_045512.2 | (6854) | 6854                                                                             | 6864 | 6875 | 6886 | 6897 | 6908 | 6919 | 6930       |
|                                                                                                                                            | (6854) | TAAAAATTTATTAAAAAATTTAAATTTAACCAATTTATTTTTCCGTTTTTTTTTAAAAGGAGTAACAATTGCAATTGT   |      |      |      |      |      |      |            |
|                                                                                                                                            | (1)    | -----                                                                            |      |      |      |      |      |      |            |
|                                                                                                                                            | (1)    | -----                                                                            |      |      |      |      |      |      |            |

## SARS-CoV-2 &amp; Bakterien.apr

|                                                      |        |                                                                                 |      |      |      |      |      |      |      |
|------------------------------------------------------|--------|---------------------------------------------------------------------------------|------|------|------|------|------|------|------|
|                                                      |        | Section 91                                                                      |      |      |      |      |      |      |      |
| Candidatus Carsonella ruddii strain BT chromosome... | (6931) | 6931                                                                            | 6941 | 6952 | 6963 | 6974 | 6985 | 6996 | 7007 |
|                                                      | (6931) | ATTGTACATTTTAAATATATATAAAATATTGAGTTGTGTAGGATTTGAACCTACGACCAATTGGTTAAAAGCCAATTGC |      |      |      |      |      |      |      |
|                                                      | (1)    | -----                                                                           |      |      |      |      |      |      |      |
|                                                      | (1)    | -----                                                                           |      |      |      |      |      |      |      |
|                                                      |        | Section 92                                                                      |      |      |      |      |      |      |      |
| Candidatus Carsonella ruddii strain BT chromosome... | (7008) | 7008                                                                            | 7018 | 7029 | 7040 | 7051 | 7062 | 7073 | 7084 |
|                                                      | (7008) | TCTACCTGTCTGAGCTAACAACCCATTTTATTGTTTAAACAATAATATTAATTCTATTTTAAAAAAAATCAATTTT    |      |      |      |      |      |      |      |
|                                                      | (1)    | -----                                                                           |      |      |      |      |      |      |      |
|                                                      | (1)    | -----                                                                           |      |      |      |      |      |      |      |
|                                                      |        | Section 93                                                                      |      |      |      |      |      |      |      |
| Candidatus Carsonella ruddii strain BT chromosome... | (7085) | 7085                                                                            | 7095 | 7106 | 7117 | 7128 | 7139 | 7150 | 7161 |
|                                                      | (7085) | TTTATTTTAAAAAATGTTTAAACATTTCTATAATTGGTGCTGGTGTTATTAGTGCTATAACAAGTTTAAATGATAAAT  |      |      |      |      |      |      |      |
|                                                      | (1)    | -----                                                                           |      |      |      |      |      |      |      |
|                                                      | (1)    | -----                                                                           |      |      |      |      |      |      |      |
|                                                      |        | Section 94                                                                      |      |      |      |      |      |      |      |
| Candidatus Carsonella ruddii strain BT chromosome... | (7162) | 7162                                                                            | 7172 | 7183 | 7194 | 7205 | 7216 | 7227 | 7238 |
|                                                      | (7162) | TTAATTAATCAAAAATTAAAAATATTTATTTTGAATTAACAATAAAGTTGCAATAGAAAATTCTAAAGCAACAAA     |      |      |      |      |      |      |      |
|                                                      | (1)    | -----                                                                           |      |      |      |      |      |      |      |
|                                                      | (1)    | -----                                                                           |      |      |      |      |      |      |      |
|                                                      |        | Section 95                                                                      |      |      |      |      |      |      |      |
| Candidatus Carsonella ruddii strain BT chromosome... | (7239) | 7239                                                                            | 7249 | 7260 | 7271 | 7282 | 7293 | 7304 | 7315 |
|                                                      | (7239) | CAATGCTGGTACAGGTCATGAAGGAATGTGTGAAAAATAATTATGTTAAACTATTAAATAAAAAATTATTATATTAATA |      |      |      |      |      |      |      |
|                                                      | (1)    | -----                                                                           |      |      |      |      |      |      |      |
|                                                      | (1)    | -----                                                                           |      |      |      |      |      |      |      |
|                                                      |        | Section 96                                                                      |      |      |      |      |      |      |      |
| Candidatus Carsonella ruddii strain BT chromosome... | (7316) | 7316                                                                            | 7326 | 7337 | 7348 | 7359 | 7370 | 7381 | 7392 |
|                                                      | (7316) | AAAATATAAATATTTATTTTAAATTTAATTTAACAAAAAATTTTTTTCATGGATTAAATTTTAAATATATTTAAT     |      |      |      |      |      |      |      |
|                                                      | (1)    | -----                                                                           |      |      |      |      |      |      |      |
|                                                      | (1)    | -----                                                                           |      |      |      |      |      |      |      |



## SARS-CoV-2 &amp; Bakterien.apr

|                                                                                                                                            |        |                                                                                   |      |      |      |      |      |             |      |
|--------------------------------------------------------------------------------------------------------------------------------------------|--------|-----------------------------------------------------------------------------------|------|------|------|------|------|-------------|------|
|                                                                                                                                            |        |                                                                                   |      |      |      |      |      | Section 97  |      |
| Candidatus Carsonella ruddii strain BT chromosome...<br>Candidatus Carsonella 135557 - 167442nt<br>SARS-CoV-2 Reference Genome NC_045512.2 | (7393) | 7393                                                                              | 7403 | 7414 | 7425 | 7436 | 7447 | 7458        | 7469 |
|                                                                                                                                            | (7393) | TTTAAAAAAGTTATTTCTAAAACTCCACATGTTTCTTTTTTTTTTTTTTAAAAATAATATAAAGTTAAAAAAAATTTT    |      |      |      |      |      |             |      |
|                                                                                                                                            | (1)    | -----                                                                             |      |      |      |      |      |             |      |
|                                                                                                                                            | (1)    | -----                                                                             |      |      |      |      |      |             |      |
|                                                                                                                                            |        |                                                                                   |      |      |      |      |      | Section 98  |      |
| Candidatus Carsonella ruddii strain BT chromosome...<br>Candidatus Carsonella 135557 - 167442nt<br>SARS-CoV-2 Reference Genome NC_045512.2 | (7470) | 7470                                                                              | 7480 | 7491 | 7502 | 7513 | 7524 | 7535        | 7546 |
|                                                                                                                                            | (7470) | TAATAAAATTAGAATTTTAAATAAATCTATAAAATTTACTAATAATAATTTTTTTTAAATAAATTTTCATTGATAA      |      |      |      |      |      |             |      |
|                                                                                                                                            | (1)    | -----                                                                             |      |      |      |      |      |             |      |
|                                                                                                                                            | (1)    | -----                                                                             |      |      |      |      |      |             |      |
|                                                                                                                                            |        |                                                                                   |      |      |      |      |      | Section 99  |      |
| Candidatus Carsonella ruddii strain BT chromosome...<br>Candidatus Carsonella 135557 - 167442nt<br>SARS-CoV-2 Reference Genome NC_045512.2 | (7547) | 7547                                                                              | 7557 | 7568 | 7579 | 7590 | 7601 | 7612        | 7623 |
|                                                                                                                                            | (7547) | TTAAAAAAAAAAAAAAAAATAAAAAAAAAATTTAGTATAACATATTACAAATATGGTTTTGATATAAATTACCAATATTTA |      |      |      |      |      |             |      |
|                                                                                                                                            | (1)    | -----                                                                             |      |      |      |      |      |             |      |
|                                                                                                                                            | (1)    | -----                                                                             |      |      |      |      |      |             |      |
|                                                                                                                                            |        |                                                                                   |      |      |      |      |      | Section 100 |      |
| Candidatus Carsonella ruddii strain BT chromosome...<br>Candidatus Carsonella 135557 - 167442nt<br>SARS-CoV-2 Reference Genome NC_045512.2 | (7624) | 7624                                                                              | 7634 | 7645 | 7656 | 7667 | 7678 | 7689        | 7700 |
|                                                                                                                                            | (7624) | TCTTTGAAAATTTTTCATTATTTAACAAAAAAAAATAAAATAAATTTATTTTTATCTTGTAATAATTATTAAATTA      |      |      |      |      |      |             |      |
|                                                                                                                                            | (1)    | -----                                                                             |      |      |      |      |      |             |      |
|                                                                                                                                            | (1)    | -----                                                                             |      |      |      |      |      |             |      |
|                                                                                                                                            |        |                                                                                   |      |      |      |      |      | Section 101 |      |
| Candidatus Carsonella ruddii strain BT chromosome...<br>Candidatus Carsonella 135557 - 167442nt<br>SARS-CoV-2 Reference Genome NC_045512.2 | (7701) | 7701                                                                              | 7711 | 7722 | 7733 | 7744 | 7755 | 7766        | 7777 |
|                                                                                                                                            | (7701) | AAATTACAAAAACAATTTATTTTAACATTATTTAAAAAAAAATTTTTTAGAATATTAAGTATTGTTTTGTTT          |      |      |      |      |      |             |      |
|                                                                                                                                            | (1)    | -----                                                                             |      |      |      |      |      |             |      |
|                                                                                                                                            | (1)    | -----                                                                             |      |      |      |      |      |             |      |
|                                                                                                                                            |        |                                                                                   |      |      |      |      |      | Section 102 |      |
| Candidatus Carsonella ruddii strain BT chromosome...<br>Candidatus Carsonella 135557 - 167442nt<br>SARS-CoV-2 Reference Genome NC_045512.2 | (7778) | 7778                                                                              | 7788 | 7799 | 7810 | 7821 | 7832 | 7843        | 7854 |
|                                                                                                                                            | (7778) | GTGCAGGTGGTAGTAGTTTAAGTATATTAAAAAAATTTAATAAAAAAATTTCAAAAAATTATTTGAATTACCAATA      |      |      |      |      |      |             |      |
|                                                                                                                                            | (1)    | -----                                                                             |      |      |      |      |      |             |      |
|                                                                                                                                            | (1)    | -----                                                                             |      |      |      |      |      |             |      |

## SARS-CoV-2 &amp; Bakterien.apr

|                                                      |        |                                                                                |      |      |      |      |      |      |      |
|------------------------------------------------------|--------|--------------------------------------------------------------------------------|------|------|------|------|------|------|------|
|                                                      |        | Section 103                                                                    |      |      |      |      |      |      |      |
| Candidatus Carsonella ruddii strain BT chromosome... | (7855) | 7855                                                                           | 7865 | 7876 | 7887 | 7898 | 7909 | 7920 | 7931 |
|                                                      | (7855) | AATGGAACATGGTTAATTTCTGAAGAAAAAATATTATTAAAAAACATAATTTAAAAATTTATAGTGAAACGATAAA   |      |      |      |      |      |      |      |
|                                                      | (1)    | -----                                                                          |      |      |      |      |      |      |      |
|                                                      | (1)    | -----                                                                          |      |      |      |      |      |      |      |
|                                                      |        | Section 104                                                                    |      |      |      |      |      |      |      |
| Candidatus Carsonella ruddii strain BT chromosome... | (7932) | 7932                                                                           | 7942 | 7953 | 7964 | 7975 | 7986 | 7997 | 8008 |
|                                                      | (7932) | AGGTAACCCACCAATGAGTATTCCTCATTTAGATATGAGAACAATTTTAAATGAGAAAAAATATTTTTTGGTCCTT   |      |      |      |      |      |      |      |
|                                                      | (1)    | -----                                                                          |      |      |      |      |      |      |      |
|                                                      | (1)    | -----                                                                          |      |      |      |      |      |      |      |
|                                                      |        | Section 105                                                                    |      |      |      |      |      |      |      |
| Candidatus Carsonella ruddii strain BT chromosome... | (8009) | 8009                                                                           | 8019 | 8030 | 8041 | 8052 | 8063 | 8074 | 8085 |
|                                                      | (8009) | TTGCTGGATTAACTTTTAAATTTTAATAAACACTAAAAAAATATAATAGAAAGTATTAATTTAAACATTTTATT     |      |      |      |      |      |      |      |
|                                                      | (1)    | -----                                                                          |      |      |      |      |      |      |      |
|                                                      | (1)    | -----                                                                          |      |      |      |      |      |      |      |
|                                                      |        | Section 106                                                                    |      |      |      |      |      |      |      |
| Candidatus Carsonella ruddii strain BT chromosome... | (8086) | 8086                                                                           | 8096 | 8107 | 8118 | 8129 | 8140 | 8151 | 8162 |
|                                                      | (8086) | AATTTAATTATTTTTTCATATGAAAACAGGTATATTATTAATTATTTAATAAATGAAAATTTAAAACTAAAAAAA    |      |      |      |      |      |      |      |
|                                                      | (1)    | -----                                                                          |      |      |      |      |      |      |      |
|                                                      | (1)    | -----                                                                          |      |      |      |      |      |      |      |
|                                                      |        | Section 107                                                                    |      |      |      |      |      |      |      |
| Candidatus Carsonella ruddii strain BT chromosome... | (8163) | 8163                                                                           | 8173 | 8184 | 8195 | 8206 | 8217 | 8228 | 8239 |
|                                                      | (8163) | AAAAATATTTGATATGTTTCCTTTTTGTAAAGTTATAAAAAATACTTATTGTAAAAATAGCAGGAAAAAGATTGCAAA |      |      |      |      |      |      |      |
|                                                      | (1)    | -----                                                                          |      |      |      |      |      |      |      |
|                                                      | (1)    | -----                                                                          |      |      |      |      |      |      |      |
|                                                      |        | Section 108                                                                    |      |      |      |      |      |      |      |
| Candidatus Carsonella ruddii strain BT chromosome... | (8240) | 8240                                                                           | 8250 | 8261 | 8272 | 8283 | 8294 | 8305 | 8316 |
|                                                      | (8240) | TTTTAAAAAATAAAACAAAAATTAAATTAAATTTTGGTACAAAATTAATTTTAAATAAAAAATAAAATTTTGCA     |      |      |      |      |      |      |      |
|                                                      | (1)    | -----                                                                          |      |      |      |      |      |      |      |
|                                                      | (1)    | -----                                                                          |      |      |      |      |      |      |      |

## SARS-CoV-2 &amp; Bakterien.apr

|                                                      |        |                                                                                |      |      |      |      |      |      |      |
|------------------------------------------------------|--------|--------------------------------------------------------------------------------|------|------|------|------|------|------|------|
| Section 109                                          |        |                                                                                |      |      |      |      |      |      |      |
| Candidatus Carsonella ruddii strain BT chromosome... | (8317) | 8317                                                                           | 8327 | 8338 | 8349 | 8360 | 8371 | 8382 | 8393 |
| Candidatus Carsonella 135557 - 167442nt              | (8317) | ACATTATTAGGAGCATCGCCTGGAGCTTCTATTTCTGTAAATATTGCTAAAAATTTAATTAAAAAGTGGTTTTTTTTT |      |      |      |      |      |      |      |
| SARS-CoV-2 Reference Genome NC_045512.2              | (1)    | -----                                                                          |      |      |      |      |      |      |      |
|                                                      | (1)    | -----                                                                          |      |      |      |      |      |      |      |
| Section 110                                          |        |                                                                                |      |      |      |      |      |      |      |
| Candidatus Carsonella ruddii strain BT chromosome... | (8394) | 8394                                                                           | 8404 | 8415 | 8426 | 8437 | 8448 | 8459 | 8470 |
| Candidatus Carsonella 135557 - 167442nt              | (8394) | TCCTAAAAAATTTTTATTTAATTATAAAAAAATAATAAAAAATCTAAAAATTTAATTTTTTTATTGTATTGAAAG    |      |      |      |      |      |      |      |
| SARS-CoV-2 Reference Genome NC_045512.2              | (1)    | -----                                                                          |      |      |      |      |      |      |      |
|                                                      | (1)    | -----                                                                          |      |      |      |      |      |      |      |
| Section 111                                          |        |                                                                                |      |      |      |      |      |      |      |
| Candidatus Carsonella ruddii strain BT chromosome... | (8471) | 8471                                                                           | 8481 | 8492 | 8503 | 8514 | 8525 | 8536 | 8547 |
| Candidatus Carsonella 135557 - 167442nt              | (8471) | GAATTGAACCTTTTACTGTTTGATTTCGTAATCAAAAACTCTATCCGATGAGTTACAAATACTTAAAAATAGAGAAAG |      |      |      |      |      |      |      |
| SARS-CoV-2 Reference Genome NC_045512.2              | (1)    | -----                                                                          |      |      |      |      |      |      |      |
|                                                      | (1)    | -----                                                                          |      |      |      |      |      |      |      |
| Section 112                                          |        |                                                                                |      |      |      |      |      |      |      |
| Candidatus Carsonella ruddii strain BT chromosome... | (8548) | 8548                                                                           | 8558 | 8569 | 8580 | 8591 | 8602 | 8613 | 8624 |
| Candidatus Carsonella 135557 - 167442nt              | (8548) | TAGGATTTCGAACCTACGATAATAAATATACTCCTTTAGCAGAGGAGTGTCTTAAGCCACTCGACCATTTCTCCTAAA |      |      |      |      |      |      |      |
| SARS-CoV-2 Reference Genome NC_045512.2              | (1)    | -----                                                                          |      |      |      |      |      |      |      |
|                                                      | (1)    | -----                                                                          |      |      |      |      |      |      |      |
| Section 113                                          |        |                                                                                |      |      |      |      |      |      |      |
| Candidatus Carsonella ruddii strain BT chromosome... | (8625) | 8625                                                                           | 8635 | 8646 | 8657 | 8668 | 8679 | 8690 | 8701 |
| Candidatus Carsonella 135557 - 167442nt              | (8625) | CATAAAATTTTTATTAAACATTAAATATAATTCTTTAATAGTTTTTATGGTATCTTTATCTTTAATAACTACAGATA  |      |      |      |      |      |      |      |
| SARS-CoV-2 Reference Genome NC_045512.2              | (1)    | -----                                                                          |      |      |      |      |      |      |      |
|                                                      | (1)    | -----                                                                          |      |      |      |      |      |      |      |
| Section 114                                          |        |                                                                                |      |      |      |      |      |      |      |
| Candidatus Carsonella ruddii strain BT chromosome... | (8702) | 8702                                                                           | 8712 | 8723 | 8734 | 8745 | 8756 | 8767 | 8778 |
| Candidatus Carsonella 135557 - 167442nt              | (8702) | TTTTTGTTTCTGAAGTAGAAATTAAATAATATTTATTTTTAATTTAGACATGCAATATAATATTTTGTCTATAATA   |      |      |      |      |      |      |      |
| SARS-CoV-2 Reference Genome NC_045512.2              | (1)    | -----                                                                          |      |      |      |      |      |      |      |
|                                                      | (1)    | -----                                                                          |      |      |      |      |      |      |      |

## SARS-CoV-2 &amp; Bakterien.apr

|                                                      |        |                                                                                 |      |      |      |      |      |      |      |
|------------------------------------------------------|--------|---------------------------------------------------------------------------------|------|------|------|------|------|------|------|
| Section 115                                          |        |                                                                                 |      |      |      |      |      |      |      |
| Candidatus Carsonella ruddii strain BT chromosome... | (8779) | 8779                                                                            | 8789 | 8800 | 8811 | 8822 | 8833 | 8844 | 8855 |
| Candidatus Carsonella 135557 - 167442nt              | (8779) | TTATTATGAGTTCTTAATCCTATACCAACAACAGAAATTTTGTATATTTAATTCATATTCTACTATTCCTCCTAA     |      |      |      |      |      |      |      |
| SARS-CoV-2 Reference Genome NC_045512.2              | (1)    | -----                                                                           |      |      |      |      |      |      |      |
|                                                      | (1)    | -----                                                                           |      |      |      |      |      |      |      |
| Section 116                                          |        |                                                                                 |      |      |      |      |      |      |      |
| Candidatus Carsonella ruddii strain BT chromosome... | (8856) | 8856                                                                            | 8866 | 8877 | 8888 | 8899 | 8910 | 8921 | 8932 |
| Candidatus Carsonella 135557 - 167442nt              | (8856) | TTTAGGAATAATATATTTATTTATTTAAATATTTAGTTTTTTTACAAAATTTATTTTCAACTAAAAAAGTAAAATTTG  |      |      |      |      |      |      |      |
| SARS-CoV-2 Reference Genome NC_045512.2              | (1)    | -----                                                                           |      |      |      |      |      |      |      |
|                                                      | (1)    | -----                                                                           |      |      |      |      |      |      |      |
| Section 117                                          |        |                                                                                 |      |      |      |      |      |      |      |
| Candidatus Carsonella ruddii strain BT chromosome... | (8933) | 8933                                                                            | 8943 | 8954 | 8965 | 8976 | 8987 | 8998 | 9009 |
| Candidatus Carsonella 135557 - 167442nt              | (8933) | TATTTTTTGCATTAATAATAGAAATTTTGAATAACCATATCTACACATATATTATTACATATAAATAGGTCCTAAAATT |      |      |      |      |      |      |      |
| SARS-CoV-2 Reference Genome NC_045512.2              | (1)    | -----                                                                           |      |      |      |      |      |      |      |
|                                                      | (1)    | -----                                                                           |      |      |      |      |      |      |      |
| Section 118                                          |        |                                                                                 |      |      |      |      |      |      |      |
| Candidatus Carsonella ruddii strain BT chromosome... | (9010) | 9010                                                                            | 9020 | 9031 | 9042 | 9053 | 9064 | 9075 | 9086 |
| Candidatus Carsonella 135557 - 167442nt              | (9010) | TTCGATGCTACTCCTGCTGTATTTGGCAAATTTTACAGTAATTTTGTCTTCATTATTAGAAATGAGTTATACCAGA    |      |      |      |      |      |      |      |
| SARS-CoV-2 Reference Genome NC_045512.2              | (1)    | -----                                                                           |      |      |      |      |      |      |      |
|                                                      | (1)    | -----                                                                           |      |      |      |      |      |      |      |
| Section 119                                          |        |                                                                                 |      |      |      |      |      |      |      |
| Candidatus Carsonella ruddii strain BT chromosome... | (9087) | 9087                                                                            | 9097 | 9108 | 9119 | 9130 | 9141 | 9152 | 9163 |
| Candidatus Carsonella 135557 - 167442nt              | (9087) | AATCATTATACGTTCCATAGAATTAGAAAATTTTTTTTATTTGAAATTAATGTTTCCTTTATTTTAAAGAAAAGAAG   |      |      |      |      |      |      |      |
| SARS-CoV-2 Reference Genome NC_045512.2              | (1)    | -----                                                                           |      |      |      |      |      |      |      |
|                                                      | (1)    | -----                                                                           |      |      |      |      |      |      |      |
| Section 120                                          |        |                                                                                 |      |      |      |      |      |      |      |
| Candidatus Carsonella ruddii strain BT chromosome... | (9164) | 9164                                                                            | 9174 | 9185 | 9196 | 9207 | 9218 | 9229 | 9240 |
| Candidatus Carsonella 135557 - 167442nt              | (9164) | ATAAAATTCTAATGTTAACATTATATTTTATTGCTATTTCAATTGATCTAACATATAAACTTTTGAACCAGAACTA    |      |      |      |      |      |      |      |
| SARS-CoV-2 Reference Genome NC_045512.2              | (1)    | -----                                                                           |      |      |      |      |      |      |      |
|                                                      | (1)    | -----                                                                           |      |      |      |      |      |      |      |

## SARS-CoV-2 &amp; Bakterien.apr

|                                                      |        |                                                                              |      |      |      |      |      |      |      |
|------------------------------------------------------|--------|------------------------------------------------------------------------------|------|------|------|------|------|------|------|
|                                                      |        | Section 121                                                                  |      |      |      |      |      |      |      |
| Candidatus Carsonella ruddii strain BT chromosome... | (9241) | 9241                                                                         | 9251 | 9262 | 9273 | 9284 | 9295 | 9306 | 9317 |
|                                                      | (9241) | GATAATTCTAAAATATTTTCAAAGGAACAAATTCAATTTTAAATTTTACAAATTCTTGGATCAGAAAAAAAAT    |      |      |      |      |      |      |      |
|                                                      | (1)    | -----                                                                        |      |      |      |      |      |      |      |
|                                                      | (1)    | -----                                                                        |      |      |      |      |      |      |      |
|                                                      |        | Section 122                                                                  |      |      |      |      |      |      |      |
| Candidatus Carsonella ruddii strain BT chromosome... | (9318) | 9318                                                                         | 9328 | 9339 | 9350 | 9361 | 9372 | 9383 | 9394 |
|                                                      | (9318) | TGAATCAACATCAGTATAAATTTGACATTCTTTGCTTTTAAACATACTGCAATTGAAATAGCAGTTGTATCTGAAC |      |      |      |      |      |      |      |
|                                                      | (1)    | -----                                                                        |      |      |      |      |      |      |      |
|                                                      | (1)    | -----                                                                        |      |      |      |      |      |      |      |
|                                                      |        | Section 123                                                                  |      |      |      |      |      |      |      |
| Candidatus Carsonella ruddii strain BT chromosome... | (9395) | 9395                                                                         | 9405 | 9416 | 9427 | 9438 | 9449 | 9460 | 9471 |
|                                                      | (9395) | CACCTCTTCCTAAAGTAGTAAATTTCCAGATTTTGTAATTCCTTGAAAACCTGCTAAAATTGGAATTTTACCTTTT |      |      |      |      |      |      |      |
|                                                      | (1)    | -----                                                                        |      |      |      |      |      |      |      |
|                                                      | (1)    | -----                                                                        |      |      |      |      |      |      |      |
|                                                      |        | Section 124                                                                  |      |      |      |      |      |      |      |
| Candidatus Carsonella ruddii strain BT chromosome... | (9472) | 9472                                                                         | 9482 | 9493 | 9504 | 9515 | 9526 | 9537 | 9548 |
|                                                      | (9472) | AATAAATTTTTTTTTATAATAAAATAATTTTAAATTTTATTATTCTAGCATTATTATATTCTTTATTTGTTATTAA |      |      |      |      |      |      |      |
|                                                      | (1)    | -----                                                                        |      |      |      |      |      |      |      |
|                                                      | (1)    | -----                                                                        |      |      |      |      |      |      |      |
|                                                      |        | Section 125                                                                  |      |      |      |      |      |      |      |
| Candidatus Carsonella ruddii strain BT chromosome... | (9549) | 9549                                                                         | 9559 | 9570 | 9581 | 9592 | 9603 | 9614 | 9625 |
|                                                      | (9549) | ACCTATTTGTATACTAGTTAAAGATTTTGATTTTATTTTATACTATTTAACAAAATACTAAATAAAGAAACACTCA |      |      |      |      |      |      |      |
|                                                      | (1)    | -----                                                                        |      |      |      |      |      |      |      |
|                                                      | (1)    | -----                                                                        |      |      |      |      |      |      |      |
|                                                      |        | Section 126                                                                  |      |      |      |      |      |      |      |
| Candidatus Carsonella ruddii strain BT chromosome... | (9626) | 9626                                                                         | 9636 | 9647 | 9658 | 9669 | 9680 | 9691 | 9702 |
|                                                      | (9626) | TTTGCTCTCCTATACATAATAACAATCTAATTCCTTTTAAATTTTAAAGAAAAATATTTGGCTAATCTTATCATT  |      |      |      |      |      |      |      |
|                                                      | (1)    | -----                                                                        |      |      |      |      |      |      |      |
|                                                      | (1)    | -----                                                                        |      |      |      |      |      |      |      |

## SARS-CoV-2 &amp; Bakterien.apr

|                                                      |         |                                                                                |       |       |       |       |       |       |       |
|------------------------------------------------------|---------|--------------------------------------------------------------------------------|-------|-------|-------|-------|-------|-------|-------|
|                                                      |         | Section 127                                                                    |       |       |       |       |       |       |       |
| Candidatus Carsonella ruddii strain BT chromosome... | (9703)  | 9703                                                                           | 9713  | 9724  | 9735  | 9746  | 9757  | 9768  | 9779  |
|                                                      | (9703)  | TTAGTTGTTTCTCCACTCATTGCAGATAATATCATTACTGTATAAAATTTTAAATTTTTTATATTTTTTTATTATATT |       |       |       |       |       |       |       |
|                                                      | (1)     | -----                                                                          |       |       |       |       |       |       |       |
|                                                      | (1)     | -----                                                                          |       |       |       |       |       |       |       |
|                                                      |         | Section 128                                                                    |       |       |       |       |       |       |       |
| Candidatus Carsonella ruddii strain BT chromosome... | (9780)  | 9780                                                                           | 9790  | 9801  | 9812  | 9823  | 9834  | 9845  | 9856  |
|                                                      | (9780)  | TTTAAGAAATTTAATTCTTTTTTTAGAACCAATTGAAGTACCTCCAAATTTTGAATTATTATCATTATATAAATATT  |       |       |       |       |       |       |       |
|                                                      | (1)     | -----                                                                          |       |       |       |       |       |       |       |
|                                                      | (1)     | -----                                                                          |       |       |       |       |       |       |       |
|                                                      |         | Section 129                                                                    |       |       |       |       |       |       |       |
| Candidatus Carsonella ruddii strain BT chromosome... | (9857)  | 9857                                                                           | 9867  | 9878  | 9889  | 9900  | 9911  | 9922  | 9933  |
|                                                      | (9857)  | TTTAATTATTAAATATATTATTTTATATGATATTCCAAATGTTTCAAAAAAAAAATTCATTTGTATTAAATTTATTT  |       |       |       |       |       |       |       |
|                                                      | (1)     | -----                                                                          |       |       |       |       |       |       |       |
|                                                      | (1)     | -----                                                                          |       |       |       |       |       |       |       |
|                                                      |         | Section 130                                                                    |       |       |       |       |       |       |       |
| Candidatus Carsonella ruddii strain BT chromosome... | (9934)  | 9934                                                                           | 9944  | 9955  | 9966  | 9977  | 9988  | 9999  | 10010 |
|                                                      | (9934)  | TTTTTAATTTTATTTTTTTTAAATCAAAAAAAAAACTATATTCTTTTTTTATTAAAAAAATAAAAAATTTTAAACA   |       |       |       |       |       |       |       |
|                                                      | (1)     | -----                                                                          |       |       |       |       |       |       |       |
|                                                      | (1)     | -----                                                                          |       |       |       |       |       |       |       |
|                                                      |         | Section 131                                                                    |       |       |       |       |       |       |       |
| Candidatus Carsonella ruddii strain BT chromosome... | (10011) | 10011                                                                          | 10021 | 10032 | 10043 | 10054 | 10065 | 10076 | 10087 |
|                                                      | (10011) | TTATTTTTTAAATAAATTTTTTATTTTTTTTAAAAAAAAAATAAATATATTAAATATATTTATTTTTTTTTTAA     |       |       |       |       |       |       |       |
|                                                      | (1)     | -----                                                                          |       |       |       |       |       |       |       |
|                                                      | (1)     | -----                                                                          |       |       |       |       |       |       |       |
|                                                      |         | Section 132                                                                    |       |       |       |       |       |       |       |
| Candidatus Carsonella ruddii strain BT chromosome... | (10088) | 10088                                                                          | 10098 | 10109 | 10120 | 10131 | 10142 | 10153 | 10164 |
|                                                      | (10088) | AATTAAATTTAAATTTATTTTAAATAATTTATTTAATATAAAATTATGATATTTTGTAATTTAAATTAACGTTAT    |       |       |       |       |       |       |       |
|                                                      | (1)     | -----                                                                          |       |       |       |       |       |       |       |
|                                                      | (1)     | -----                                                                          |       |       |       |       |       |       |       |

## SARS-CoV-2 &amp; Bakterien.apr

|                                                      |         |                                                                               |       |       |       |       |       |             |       |
|------------------------------------------------------|---------|-------------------------------------------------------------------------------|-------|-------|-------|-------|-------|-------------|-------|
|                                                      |         |                                                                               |       |       |       |       |       | Section 133 |       |
| Candidatus Carsonella ruddii strain BT chromosome... | (10165) | 10165                                                                         | 10175 | 10186 | 10197 | 10208 | 10219 | 10230       | 10241 |
| Candidatus Carsonella 135557 - 167442nt              | (10165) | TTTTTATTAAAAATATTGAATTGCACAAATCATTTAATTTTAAATTTTTTTTAAAAAATAAAAAATTTAACCTATCA |       |       |       |       |       |             |       |
| SARS-CoV-2 Reference Genome NC_045512.2              | (1)     | -----                                                                         |       |       |       |       |       |             |       |
|                                                      | (1)     | -----                                                                         |       |       |       |       |       |             |       |
|                                                      |         |                                                                               |       |       |       |       |       | Section 134 |       |
| Candidatus Carsonella ruddii strain BT chromosome... | (10242) | 10242                                                                         | 10252 | 10263 | 10274 | 10285 | 10296 | 10307       | 10318 |
| Candidatus Carsonella 135557 - 167442nt              | (10242) | TATCCTAAACCTGAATCTATTATATTATTTTTTAATTTAATAACTTTTTTATTATTTTTATAATATTTAATATTAAC |       |       |       |       |       |             |       |
| SARS-CoV-2 Reference Genome NC_045512.2              | (1)     | -----                                                                         |       |       |       |       |       |             |       |
|                                                      | (1)     | -----                                                                         |       |       |       |       |       |             |       |
|                                                      |         |                                                                               |       |       |       |       |       | Section 135 |       |
| Candidatus Carsonella ruddii strain BT chromosome... | (10319) | 10319                                                                         | 10329 | 10340 | 10351 | 10362 | 10373 | 10384       | 10395 |
| Candidatus Carsonella 135557 - 167442nt              | (10319) | AATATTCCATATTTCTAACATAATATTTTTAAAAAATAATATATTTCTAAACAAAAACCTAAAAATCCATTTTTAT  |       |       |       |       |       |             |       |
| SARS-CoV-2 Reference Genome NC_045512.2              | (1)     | -----                                                                         |       |       |       |       |       |             |       |
|                                                      | (1)     | -----                                                                         |       |       |       |       |       |             |       |
|                                                      |         |                                                                               |       |       |       |       |       | Section 136 |       |
| Candidatus Carsonella ruddii strain BT chromosome... | (10396) | 10396                                                                         | 10406 | 10417 | 10428 | 10439 | 10450 | 10461       | 10472 |
| Candidatus Carsonella 135557 - 167442nt              | (10396) | TAATTTTCCAAATATTTTTTTTTGTAAAAATTATATTTTAAATATTTATTTTAAATATTAAACATTAAATATAGTT  |       |       |       |       |       |             |       |
| SARS-CoV-2 Reference Genome NC_045512.2              | (1)     | -----                                                                         |       |       |       |       |       |             |       |
|                                                      | (1)     | -----                                                                         |       |       |       |       |       |             |       |
|                                                      |         |                                                                               |       |       |       |       |       | Section 137 |       |
| Candidatus Carsonella ruddii strain BT chromosome... | (10473) | 10473                                                                         | 10483 | 10494 | 10505 | 10516 | 10527 | 10538       | 10549 |
| Candidatus Carsonella 135557 - 167442nt              | (10473) | AAAAAATCAACAATATTTAAAGAAAAAATTTTTTTTTTATTTAATTTCTTAAAAATAAAATAAATATTGTATAGA   |       |       |       |       |       |             |       |
| SARS-CoV-2 Reference Genome NC_045512.2              | (1)     | -----                                                                         |       |       |       |       |       |             |       |
|                                                      | (1)     | -----                                                                         |       |       |       |       |       |             |       |
|                                                      |         |                                                                               |       |       |       |       |       | Section 138 |       |
| Candidatus Carsonella ruddii strain BT chromosome... | (10550) | 10550                                                                         | 10560 | 10571 | 10582 | 10593 | 10604 | 10615       | 10626 |
| Candidatus Carsonella 135557 - 167442nt              | (10550) | TATATTTAATAAAAAAATGTTTGTTTTACTTAAAAAATTACCTAACATTATAAATGAAGTTTTATGTATACCAT    |       |       |       |       |       |             |       |
| SARS-CoV-2 Reference Genome NC_045512.2              | (1)     | -----                                                                         |       |       |       |       |       |             |       |
|                                                      | (1)     | -----                                                                         |       |       |       |       |       |             |       |

## SARS-CoV-2 &amp; Bakterien.apr

|                                                      |         |                                                                                 |       |       |       |       |       |             |       |
|------------------------------------------------------|---------|---------------------------------------------------------------------------------|-------|-------|-------|-------|-------|-------------|-------|
|                                                      |         |                                                                                 |       |       |       |       |       | Section 139 |       |
| Candidatus Carsonella ruddii strain BT chromosome... | (10627) | 10627                                                                           | 10637 | 10648 | 10659 | 10670 | 10681 | 10692       | 10703 |
| Candidatus Carsonella 135557 - 167442nt              | (10627) | CATTATTTAAATTTAAATCATTAAAAATACCTTTTAATCTTACACAATATTGAAAAGAGCAAAAATTATTTTTAAAT   |       |       |       |       |       |             |       |
| SARS-CoV-2 Reference Genome NC_045512.2              | (1)     | -----                                                                           |       |       |       |       |       |             |       |
|                                                      | (1)     | -----                                                                           |       |       |       |       |       |             |       |
|                                                      |         |                                                                                 |       |       |       |       |       | Section 140 |       |
| Candidatus Carsonella ruddii strain BT chromosome... | (10704) | 10704                                                                           | 10714 | 10725 | 10736 | 10747 | 10758 | 10769       | 10780 |
| Candidatus Carsonella 135557 - 167442nt              | (10704) | GAATTTAGAATTATTTTTTTTAATTGATGAAAAACCAGAATTGTTAAACAATAAAGTTTTACAATTTGAAATAATATT  |       |       |       |       |       |             |       |
| SARS-CoV-2 Reference Genome NC_045512.2              | (1)     | -----                                                                           |       |       |       |       |       |             |       |
|                                                      | (1)     | -----                                                                           |       |       |       |       |       |             |       |
|                                                      |         |                                                                                 |       |       |       |       |       | Section 141 |       |
| Candidatus Carsonella ruddii strain BT chromosome... | (10781) | 10781                                                                           | 10791 | 10802 | 10813 | 10824 | 10835 | 10846       | 10857 |
| Candidatus Carsonella 135557 - 167442nt              | (10781) | TTGTGTTCCCTAATATTTTAAAATTATAAATATTATAATATTTTAAATAATTAATCATATTTTTTAATTAAATTTCT   |       |       |       |       |       |             |       |
| SARS-CoV-2 Reference Genome NC_045512.2              | (1)     | -----                                                                           |       |       |       |       |       |             |       |
|                                                      | (1)     | -----                                                                           |       |       |       |       |       |             |       |
|                                                      |         |                                                                                 |       |       |       |       |       | Section 142 |       |
| Candidatus Carsonella ruddii strain BT chromosome... | (10858) | 10858                                                                           | 10868 | 10879 | 10890 | 10901 | 10912 | 10923       | 10934 |
| Candidatus Carsonella 135557 - 167442nt              | (10858) | ATATTTTTTTAAAAATTTTTTTTCAAAGACATTTTTTTTAATTAATTCATTTTTCTCATATAATTTTTTGATTAAATAA |       |       |       |       |       |             |       |
| SARS-CoV-2 Reference Genome NC_045512.2              | (1)     | -----                                                                           |       |       |       |       |       |             |       |
|                                                      | (1)     | -----                                                                           |       |       |       |       |       |             |       |
|                                                      |         |                                                                                 |       |       |       |       |       | Section 143 |       |
| Candidatus Carsonella ruddii strain BT chromosome... | (10935) | 10935                                                                           | 10945 | 10956 | 10967 | 10978 | 10989 | 11000       | 11011 |
| Candidatus Carsonella 135557 - 167442nt              | (10935) | AAATTTATTTTTTTTTTTTTTCAAATATTTTAAATTTAATTGAAAAATTAAAAATTCATTAATTTTATAAATTCCAT   |       |       |       |       |       |             |       |
| SARS-CoV-2 Reference Genome NC_045512.2              | (1)     | -----                                                                           |       |       |       |       |       |             |       |
|                                                      | (1)     | -----                                                                           |       |       |       |       |       |             |       |
|                                                      |         |                                                                                 |       |       |       |       |       | Section 144 |       |
| Candidatus Carsonella ruddii strain BT chromosome... | (11012) | 11012                                                                           | 11022 | 11033 | 11044 | 11055 | 11066 | 11077       | 11088 |
| Candidatus Carsonella 135557 - 167442nt              | (11012) | ATCCAAAAATTAATTGTATTTTAGTTTCTCTGTAAGGTTTTGATAATTTATTTTTTAAATTAACCTTTAATTCT      |       |       |       |       |       |             |       |
| SARS-CoV-2 Reference Genome NC_045512.2              | (1)     | -----                                                                           |       |       |       |       |       |             |       |
|                                                      | (1)     | -----                                                                           |       |       |       |       |       |             |       |



## SARS-CoV-2 &amp; Bakterien.apr

|                                                      |         |                                                                                |       |       |       |       |       |       |       |
|------------------------------------------------------|---------|--------------------------------------------------------------------------------|-------|-------|-------|-------|-------|-------|-------|
|                                                      |         | Section 145                                                                    |       |       |       |       |       |       |       |
| Candidatus Carsonella ruddii strain BT chromosome... | (11089) | 11089                                                                          | 11099 | 11110 | 11121 | 11132 | 11143 | 11154 | 11165 |
|                                                      | (11089) | TGACCAATAATATTATTTTTACTTTTTAAAAAACCAATTCTTTTAATTCTATTCTTATAGAAGAATAAAATTTAAC   |       |       |       |       |       |       |       |
|                                                      | (1)     | -----                                                                          |       |       |       |       |       |       |       |
| Candidatus Carsonella 135557 - 167442nt              | (1)     | -----                                                                          |       |       |       |       |       |       |       |
| SARS-CoV-2 Reference Genome NC_045512.2              | (1)     | -----                                                                          |       |       |       |       |       |       |       |
|                                                      |         | Section 146                                                                    |       |       |       |       |       |       |       |
| Candidatus Carsonella ruddii strain BT chromosome... | (11166) | 11166                                                                          | 11176 | 11187 | 11198 | 11209 | 11220 | 11231 | 11242 |
|                                                      | (11166) | AGAATTTCCACCTGTAGAAATTTCTTTGAAAAAAATTAGAAATTTTAACTCTTACTTGATTAATTAATATAAATA    |       |       |       |       |       |       |       |
|                                                      | (1)     | -----                                                                          |       |       |       |       |       |       |       |
| Candidatus Carsonella 135557 - 167442nt              | (1)     | -----                                                                          |       |       |       |       |       |       |       |
| SARS-CoV-2 Reference Genome NC_045512.2              | (1)     | -----                                                                          |       |       |       |       |       |       |       |
|                                                      |         | Section 147                                                                    |       |       |       |       |       |       |       |
| Candidatus Carsonella ruddii strain BT chromosome... | (11243) | 11243                                                                          | 11253 | 11264 | 11275 | 11286 | 11297 | 11308 | 11319 |
|                                                      | (11243) | AAATATTATTTTTCTTATATTAGGTATAATTTTTTTTAACTTTTGAAATTAATCTAGCATGACAACCTATTAAA     |       |       |       |       |       |       |       |
|                                                      | (1)     | -----                                                                          |       |       |       |       |       |       |       |
| Candidatus Carsonella 135557 - 167442nt              | (1)     | -----                                                                          |       |       |       |       |       |       |       |
| SARS-CoV-2 Reference Genome NC_045512.2              | (1)     | -----                                                                          |       |       |       |       |       |       |       |
|                                                      |         | Section 148                                                                    |       |       |       |       |       |       |       |
| Candidatus Carsonella ruddii strain BT chromosome... | (11320) | 11320                                                                          | 11330 | 11341 | 11352 | 11363 | 11374 | 11385 | 11396 |
|                                                      | (11320) | TTATCTTGAGATATTATTTTCATTTTGAGATACAATTGCTGCTATTGAATCAATTATAATAACATTTACTAATTTTGT |       |       |       |       |       |       |       |
|                                                      | (1)     | -----                                                                          |       |       |       |       |       |       |       |
| Candidatus Carsonella 135557 - 167442nt              | (1)     | -----                                                                          |       |       |       |       |       |       |       |
| SARS-CoV-2 Reference Genome NC_045512.2              | (1)     | -----                                                                          |       |       |       |       |       |       |       |
|                                                      |         | Section 149                                                                    |       |       |       |       |       |       |       |
| Candidatus Carsonella ruddii strain BT chromosome... | (11397) | 11397                                                                          | 11407 | 11418 | 11429 | 11440 | 11451 | 11462 | 11473 |
|                                                      | (11397) | ATTTATTAATTTAAAACATATTTCAAATACATTTTCACCATTATTTGGTTGAAATATTAATAATTTAGAAATGTTTA  |       |       |       |       |       |       |       |
|                                                      | (1)     | -----                                                                          |       |       |       |       |       |       |       |
| Candidatus Carsonella 135557 - 167442nt              | (1)     | -----                                                                          |       |       |       |       |       |       |       |
| SARS-CoV-2 Reference Genome NC_045512.2              | (1)     | -----                                                                          |       |       |       |       |       |       |       |
|                                                      |         | Section 150                                                                    |       |       |       |       |       |       |       |
| Candidatus Carsonella ruddii strain BT chromosome... | (11474) | 11474                                                                          | 11484 | 11495 | 11506 | 11517 | 11528 | 11539 | 11550 |
|                                                      | (11474) | TCCCCAAATTTTCTAAGTAATTTACATCTATACAATGTTCAACATCTATATACGCACAAATATCTCCAACCTTTTGT  |       |       |       |       |       |       |       |
|                                                      | (1)     | -----                                                                          |       |       |       |       |       |       |       |
| Candidatus Carsonella 135557 - 167442nt              | (1)     | -----                                                                          |       |       |       |       |       |       |       |
| SARS-CoV-2 Reference Genome NC_045512.2              | (1)     | -----                                                                          |       |       |       |       |       |       |       |

|                                                      |         |                                                                                |       |       |       |       |       |       |       |
|------------------------------------------------------|---------|--------------------------------------------------------------------------------|-------|-------|-------|-------|-------|-------|-------|
|                                                      |         | Section 151                                                                    |       |       |       |       |       |       |       |
| Candidatus Carsonella ruddii strain BT chromosome... | (11551) | 11551                                                                          | 11561 | 11572 | 11583 | 11594 | 11605 | 11616 | 11627 |
|                                                      | (11551) | GCTTCTTTAATTATCGATAAAGATAAAGTTGTTTTCTCTGATGATTCTTGACCAAATATTTCAATAATTCTACCATA  |       |       |       |       |       |       |       |
|                                                      | (1)     | -----                                                                          |       |       |       |       |       |       |       |
| Candidatus Carsonella 135557 - 167442nt              | (1)     | -----                                                                          |       |       |       |       |       |       |       |
| SARS-CoV-2 Reference Genome NC_045512.2              | (1)     | -----                                                                          |       |       |       |       |       |       |       |
|                                                      |         | Section 152                                                                    |       |       |       |       |       |       |       |
| Candidatus Carsonella ruddii strain BT chromosome... | (11628) | 11628                                                                          | 11638 | 11649 | 11660 | 11671 | 11682 | 11693 | 11704 |
|                                                      | (11628) | AGGTAATCCACCGATACCCAAAATATTATCTATGTTTAAAGAACCAGTTGATAAACATTCAATTTTTCTAAGATGAT  |       |       |       |       |       |       |       |
|                                                      | (1)     | -----                                                                          |       |       |       |       |       |       |       |
| Candidatus Carsonella 135557 - 167442nt              | (1)     | -----                                                                          |       |       |       |       |       |       |       |
| SARS-CoV-2 Reference Genome NC_045512.2              | (1)     | -----                                                                          |       |       |       |       |       |       |       |
|                                                      |         | Section 153                                                                    |       |       |       |       |       |       |       |
| Candidatus Carsonella ruddii strain BT chromosome... | (11705) | 11705                                                                          | 11715 | 11726 | 11737 | 11748 | 11759 | 11770 | 11781 |
|                                                      | (11705) | CAAAATTCATATTTTTTTTAAAAAAAAAATTATTTTTTATAATTTTACCACCTCCAAATATTACAGGAGAAATGCATA |       |       |       |       |       |       |       |
|                                                      | (1)     | -----                                                                          |       |       |       |       |       |       |       |
| Candidatus Carsonella 135557 - 167442nt              | (1)     | -----                                                                          |       |       |       |       |       |       |       |
| SARS-CoV-2 Reference Genome NC_045512.2              | (1)     | -----                                                                          |       |       |       |       |       |       |       |
|                                                      |         | Section 154                                                                    |       |       |       |       |       |       |       |
| Candidatus Carsonella ruddii strain BT chromosome... | (11782) | 11782                                                                          | 11792 | 11803 | 11814 | 11825 | 11836 | 11847 | 11858 |
|                                                      | (11782) | TAGGTCATTTTTTTCAATATTTTATTATAGATATAATAATAAAATGGAAAATTTTACAAGAATATAAAATTAATTAT  |       |       |       |       |       |       |       |
|                                                      | (1)     | -----                                                                          |       |       |       |       |       |       |       |
| Candidatus Carsonella 135557 - 167442nt              | (1)     | -----                                                                          |       |       |       |       |       |       |       |
| SARS-CoV-2 Reference Genome NC_045512.2              | (1)     | -----                                                                          |       |       |       |       |       |       |       |
|                                                      |         | Section 155                                                                    |       |       |       |       |       |       |       |
| Candidatus Carsonella ruddii strain BT chromosome... | (11859) | 11859                                                                          | 11869 | 11880 | 11891 | 11902 | 11913 | 11924 | 11935 |
|                                                      | (11859) | ATTTTTGGTTTAGATCATGCTGGAATTTTCAGCAATTATAAAATTTAAAAATATTAAAAACATAATTAAAAA       |       |       |       |       |       |       |       |
|                                                      | (1)     | -----                                                                          |       |       |       |       |       |       |       |
| Candidatus Carsonella 135557 - 167442nt              | (1)     | -----                                                                          |       |       |       |       |       |       |       |
| SARS-CoV-2 Reference Genome NC_045512.2              | (1)     | -----                                                                          |       |       |       |       |       |       |       |
|                                                      |         | Section 156                                                                    |       |       |       |       |       |       |       |
| Candidatus Carsonella ruddii strain BT chromosome... | (11936) | 11936                                                                          | 11946 | 11957 | 11968 | 11979 | 11990 | 12001 | 12012 |
|                                                      | (11936) | ACAAATAATTATTAATTTTTTAAATCAATTAAAAATATATAAACTTTTTTATAATAAATAAAAAAATATTATTTACAT |       |       |       |       |       |       |       |
|                                                      | (1)     | -----                                                                          |       |       |       |       |       |       |       |
| Candidatus Carsonella 135557 - 167442nt              | (1)     | -----                                                                          |       |       |       |       |       |       |       |
| SARS-CoV-2 Reference Genome NC_045512.2              | (1)     | -----                                                                          |       |       |       |       |       |       |       |

## SARS-CoV-2 &amp; Bakterien.apr

|                                                      |         |                                                                                |       |       |       |       |       |       |       |
|------------------------------------------------------|---------|--------------------------------------------------------------------------------|-------|-------|-------|-------|-------|-------|-------|
|                                                      |         | Section 157                                                                    |       |       |       |       |       |       |       |
| Candidatus Carsonella ruddii strain BT chromosome... | (12013) | 12013                                                                          | 12023 | 12034 | 12045 | 12056 | 12067 | 12078 | 12089 |
|                                                      | (12013) | TAAATAATAAATATTCTAATTTTATAAAAAAAAAAATTTATATTTTTTATAAAAAAAAAATTTATATATATAGATAAA |       |       |       |       |       |       |       |
|                                                      | (1)     | -----                                                                          |       |       |       |       |       |       |       |
|                                                      | (1)     | -----                                                                          |       |       |       |       |       |       |       |
|                                                      |         | Section 158                                                                    |       |       |       |       |       |       |       |
| Candidatus Carsonella ruddii strain BT chromosome... | (12090) | 12090                                                                          | 12100 | 12111 | 12122 | 12133 | 12144 | 12155 | 12166 |
|                                                      | (12090) | AAAATTTTAAATTTTAATAAAAAATAATATAATTTTCAGATTTTGAAATTTTAAAAAAAAATATAATAAATATTTTAA |       |       |       |       |       |       |       |
|                                                      | (1)     | -----                                                                          |       |       |       |       |       |       |       |
|                                                      | (1)     | -----                                                                          |       |       |       |       |       |       |       |
|                                                      |         | Section 159                                                                    |       |       |       |       |       |       |       |
| Candidatus Carsonella ruddii strain BT chromosome... | (12167) | 12167                                                                          | 12177 | 12188 | 12199 | 12210 | 12221 | 12232 | 12243 |
|                                                      | (12167) | TTATATAAAATATAAAAAATAAAAAAATTTTATAATTTCAACTTCAAATTTAAATCTTTATTATATAATACTTTTT   |       |       |       |       |       |       |       |
|                                                      | (1)     | -----                                                                          |       |       |       |       |       |       |       |
|                                                      | (1)     | -----                                                                          |       |       |       |       |       |       |       |
|                                                      |         | Section 160                                                                    |       |       |       |       |       |       |       |
| Candidatus Carsonella ruddii strain BT chromosome... | (12244) | 12244                                                                          | 12254 | 12265 | 12276 | 12287 | 12298 | 12309 | 12320 |
|                                                      | (12244) | GTTGTTTAAATTTTAAATTTTATAATAAAAAATAAAATCTCCTTTTAAATTTAAACTTATATTTATTATTTTAAAA   |       |       |       |       |       |       |       |
|                                                      | (1)     | -----                                                                          |       |       |       |       |       |       |       |
|                                                      | (1)     | -----                                                                          |       |       |       |       |       |       |       |
|                                                      |         | Section 161                                                                    |       |       |       |       |       |       |       |
| Candidatus Carsonella ruddii strain BT chromosome... | (12321) | 12321                                                                          | 12331 | 12342 | 12353 | 12364 | 12375 | 12386 | 12397 |
|                                                      | (12321) | AAAAAATTAATAATTTTCAAAAAATAAAAAATTATCACCAAATATAAATAATTATGATTATTTAATTTGTGATAA    |       |       |       |       |       |       |       |
|                                                      | (1)     | -----                                                                          |       |       |       |       |       |       |       |
|                                                      | (1)     | -----                                                                          |       |       |       |       |       |       |       |
|                                                      |         | Section 162                                                                    |       |       |       |       |       |       |       |
| Candidatus Carsonella ruddii strain BT chromosome... | (12398) | 12398                                                                          | 12408 | 12419 | 12430 | 12441 | 12452 | 12463 | 12474 |
|                                                      | (12398) | AATAAAAGAAAATATATTTTTAAAAAATAAAAAAATATTTTTTGTATAAAATTAATAATTTTCATAAAAAAATTA    |       |       |       |       |       |       |       |
|                                                      | (1)     | -----                                                                          |       |       |       |       |       |       |       |
|                                                      | (1)     | -----                                                                          |       |       |       |       |       |       |       |

## SARS-CoV-2 &amp; Bakterien.apr

|                                                      |         |                                                                               |       |       |       |       |       |       |       |
|------------------------------------------------------|---------|-------------------------------------------------------------------------------|-------|-------|-------|-------|-------|-------|-------|
|                                                      |         | Section 163                                                                   |       |       |       |       |       |       |       |
| Candidatus Carsonella ruddii strain BT chromosome... | (12475) | 12475                                                                         | 12485 | 12496 | 12507 | 12518 | 12529 | 12540 | 12551 |
|                                                      | (12475) | AAAAAGTATTTTTTTTATAATAAAATTAATATTAATAATATTTTTTTTTTTTAAAAAAAACAATTATATTATTTGT  |       |       |       |       |       |       |       |
|                                                      | (1)     | -----                                                                         |       |       |       |       |       |       |       |
| Candidatus Carsonella 135557 - 167442nt              | (1)     | -----                                                                         |       |       |       |       |       |       |       |
| SARS-CoV-2 Reference Genome NC_045512.2              | (1)     | -----                                                                         |       |       |       |       |       |       |       |
|                                                      |         | Section 164                                                                   |       |       |       |       |       |       |       |
| Candidatus Carsonella ruddii strain BT chromosome... | (12552) | 12552                                                                         | 12562 | 12573 | 12584 | 12595 | 12606 | 12617 | 12628 |
|                                                      | (12552) | ATTAAAAATATAAATCTTTTAAAAATTTACATAAATTTAAAAATTTAGAAATTAAAAATCTATATTTGATCAATG   |       |       |       |       |       |       |       |
|                                                      | (1)     | -----                                                                         |       |       |       |       |       |       |       |
| Candidatus Carsonella 135557 - 167442nt              | (1)     | -----                                                                         |       |       |       |       |       |       |       |
| SARS-CoV-2 Reference Genome NC_045512.2              | (1)     | -----                                                                         |       |       |       |       |       |       |       |
|                                                      |         | Section 165                                                                   |       |       |       |       |       |       |       |
| Candidatus Carsonella ruddii strain BT chromosome... | (12629) | 12629                                                                         | 12639 | 12650 | 12661 | 12672 | 12683 | 12694 | 12705 |
|                                                      | (12629) | GTTTTTAAAAATTAAAAAATAATATATTTTAAAAAATAATTAATTCAATTAAATATTAAACCAGATAAATATAAAA  |       |       |       |       |       |       |       |
|                                                      | (1)     | -----                                                                         |       |       |       |       |       |       |       |
| Candidatus Carsonella 135557 - 167442nt              | (1)     | -----                                                                         |       |       |       |       |       |       |       |
| SARS-CoV-2 Reference Genome NC_045512.2              | (1)     | -----                                                                         |       |       |       |       |       |       |       |
|                                                      |         | Section 166                                                                   |       |       |       |       |       |       |       |
| Candidatus Carsonella ruddii strain BT chromosome... | (12706) | 12706                                                                         | 12716 | 12727 | 12738 | 12749 | 12760 | 12771 | 12782 |
|                                                      | (12706) | AAATATTTTTAATTTGGATAAAAAATATGTCAAATTGGTGTATTTCAAGAAAAATTAAATGGGGAACAAAAATACCA |       |       |       |       |       |       |       |
|                                                      | (1)     | -----                                                                         |       |       |       |       |       |       |       |
| Candidatus Carsonella 135557 - 167442nt              | (1)     | -----                                                                         |       |       |       |       |       |       |       |
| SARS-CoV-2 Reference Genome NC_045512.2              | (1)     | -----                                                                         |       |       |       |       |       |       |       |
|                                                      |         | Section 167                                                                   |       |       |       |       |       |       |       |
| Candidatus Carsonella ruddii strain BT chromosome... | (12783) | 12783                                                                         | 12793 | 12804 | 12815 | 12826 | 12837 | 12848 | 12859 |
|                                                      | (12783) | ATTTTTTATGATAAAGAAAAAATTTATTTTTTAAAAAAAAAATTTAGATTTTTTAAATATTACAAATTATTTGAAGT |       |       |       |       |       |       |       |
|                                                      | (1)     | -----                                                                         |       |       |       |       |       |       |       |
| Candidatus Carsonella 135557 - 167442nt              | (1)     | -----                                                                         |       |       |       |       |       |       |       |
| SARS-CoV-2 Reference Genome NC_045512.2              | (1)     | -----                                                                         |       |       |       |       |       |       |       |
|                                                      |         | Section 168                                                                   |       |       |       |       |       |       |       |
| Candidatus Carsonella ruddii strain BT chromosome... | (12860) | 12860                                                                         | 12870 | 12881 | 12892 | 12903 | 12914 | 12925 | 12936 |
|                                                      | (12860) | TTTTGATACTTGGTTTAATTCATCTTTTTGGATATTATTTTTATATTATAAATATAAAAAATTCCAAGATATTATTT |       |       |       |       |       |       |       |
|                                                      | (1)     | -----                                                                         |       |       |       |       |       |       |       |
| Candidatus Carsonella 135557 - 167442nt              | (1)     | -----                                                                         |       |       |       |       |       |       |       |
| SARS-CoV-2 Reference Genome NC_045512.2              | (1)     | -----                                                                         |       |       |       |       |       |       |       |

## SARS-CoV-2 &amp; Bakterien.apr

|                                                      |         |                                                                               |       |       |       |       |       |       |       |
|------------------------------------------------------|---------|-------------------------------------------------------------------------------|-------|-------|-------|-------|-------|-------|-------|
|                                                      |         | Section 169                                                                   |       |       |       |       |       |       |       |
| Candidatus Carsonella ruddii strain BT chromosome... | (12937) | 12937                                                                         | 12947 | 12958 | 12969 | 12980 | 12991 | 13002 | 13013 |
|                                                      | (12937) | TATCTGGTTTTGATATTATTTTTTTATTGGATAATAAAAAATGATTATTAATAATATTTTTTTTAAAAAAAATATTA |       |       |       |       |       |       |       |
|                                                      | (1)     | -----                                                                         |       |       |       |       |       |       |       |
| Candidatus Carsonella 135557 - 167442nt              | (1)     | -----                                                                         |       |       |       |       |       |       |       |
| SARS-CoV-2 Reference Genome NC_045512.2              | (1)     | -----                                                                         |       |       |       |       |       |       |       |
|                                                      |         | Section 170                                                                   |       |       |       |       |       |       |       |
| Candidatus Carsonella ruddii strain BT chromosome... | (13014) | 13014                                                                         | 13024 | 13035 | 13046 | 13057 | 13068 | 13079 | 13090 |
|                                                      | (13014) | ATTAAAAAATAATAATTCATGGAATATTAAGAGATAATAATAAAAAAATATCAAAAACAATAATAATGTAAT      |       |       |       |       |       |       |       |
|                                                      | (1)     | -----                                                                         |       |       |       |       |       |       |       |
| Candidatus Carsonella 135557 - 167442nt              | (1)     | -----                                                                         |       |       |       |       |       |       |       |
| SARS-CoV-2 Reference Genome NC_045512.2              | (1)     | -----                                                                         |       |       |       |       |       |       |       |
|                                                      |         | Section 171                                                                   |       |       |       |       |       |       |       |
| Candidatus Carsonella ruddii strain BT chromosome... | (13091) | 13091                                                                         | 13101 | 13112 | 13123 | 13134 | 13145 | 13156 | 13167 |
|                                                      | (13091) | AAATTTTATACATATTAAAAAAACATAAATAAAATAAAATTATGTTATTAAATAATATTTTTGATGATAATGATT   |       |       |       |       |       |       |       |
|                                                      | (1)     | -----                                                                         |       |       |       |       |       |       |       |
| Candidatus Carsonella 135557 - 167442nt              | (1)     | -----                                                                         |       |       |       |       |       |       |       |
| SARS-CoV-2 Reference Genome NC_045512.2              | (1)     | -----                                                                         |       |       |       |       |       |       |       |
|                                                      |         | Section 172                                                                   |       |       |       |       |       |       |       |
| Candidatus Carsonella ruddii strain BT chromosome... | (13168) | 13168                                                                         | 13178 | 13189 | 13200 | 13211 | 13222 | 13233 | 13244 |
|                                                      | (13168) | TAAAAAATATTAATTTTTTTTTTAAAAAAAATATTTATTAAAAAATACAAATAAAATTAATATAATTTTTCAAATT  |       |       |       |       |       |       |       |
|                                                      | (1)     | -----                                                                         |       |       |       |       |       |       |       |
| Candidatus Carsonella 135557 - 167442nt              | (1)     | -----                                                                         |       |       |       |       |       |       |       |
| SARS-CoV-2 Reference Genome NC_045512.2              | (1)     | -----                                                                         |       |       |       |       |       |       |       |
|                                                      |         | Section 173                                                                   |       |       |       |       |       |       |       |
| Candidatus Carsonella ruddii strain BT chromosome... | (13245) | 13245                                                                         | 13255 | 13266 | 13277 | 13288 | 13299 | 13310 | 13321 |
|                                                      | (13245) | TTTTTATTTTATAAAATTAAAAACAATATATATTGAAATTTAATAATAATAATTATATAAATAATGTAAATTTTTT  |       |       |       |       |       |       |       |
|                                                      | (1)     | -----                                                                         |       |       |       |       |       |       |       |
| Candidatus Carsonella 135557 - 167442nt              | (1)     | -----                                                                         |       |       |       |       |       |       |       |
| SARS-CoV-2 Reference Genome NC_045512.2              | (1)     | -----                                                                         |       |       |       |       |       |       |       |
|                                                      |         | Section 174                                                                   |       |       |       |       |       |       |       |
| Candidatus Carsonella ruddii strain BT chromosome... | (13322) | 13322                                                                         | 13332 | 13343 | 13354 | 13365 | 13376 | 13387 | 13398 |
|                                                      | (13322) | TTTAAAAAAAATAACCTATCAAAAAAATTTATATATTATTAATTAAATTTTTTATCCTAAAAAATGTTTTTAA     |       |       |       |       |       |       |       |
|                                                      | (1)     | -----                                                                         |       |       |       |       |       |       |       |
| Candidatus Carsonella 135557 - 167442nt              | (1)     | -----                                                                         |       |       |       |       |       |       |       |
| SARS-CoV-2 Reference Genome NC_045512.2              | (1)     | -----                                                                         |       |       |       |       |       |       |       |

|                                                      |         |                                                                                  |       |       |       |       |       |       |       |
|------------------------------------------------------|---------|----------------------------------------------------------------------------------|-------|-------|-------|-------|-------|-------|-------|
|                                                      |         | Section 175                                                                      |       |       |       |       |       |       |       |
| Candidatus Carsonella ruddii strain BT chromosome... | (13399) | 13399                                                                            | 13409 | 13420 | 13431 | 13442 | 13453 | 13464 | 13475 |
|                                                      | (13399) | ATGTTAAAAATTGGAATTTTTCAATTAATAATTATGTTTATAAAATTAAATTTAATTATTTTTTTATTAATAAAAAATT  |       |       |       |       |       |       |       |
|                                                      | (1)     | -----                                                                            |       |       |       |       |       |       |       |
| Candidatus Carsonella 135557 - 167442nt              | (1)     | -----                                                                            |       |       |       |       |       |       |       |
| SARS-CoV-2 Reference Genome NC_045512.2              | (1)     | -----                                                                            |       |       |       |       |       |       |       |
|                                                      |         | Section 176                                                                      |       |       |       |       |       |       |       |
| Candidatus Carsonella ruddii strain BT chromosome... | (13476) | 13476                                                                            | 13486 | 13497 | 13508 | 13519 | 13530 | 13541 | 13552 |
|                                                      | (13476) | AAAAAAAAAAGCTTTCTTAATTAAAAAAATTTTTTTTTTAAATTTATTTTGAAATATTATATAATATAAAAAATAATATT |       |       |       |       |       |       |       |
|                                                      | (1)     | -----                                                                            |       |       |       |       |       |       |       |
| Candidatus Carsonella 135557 - 167442nt              | (1)     | -----                                                                            |       |       |       |       |       |       |       |
| SARS-CoV-2 Reference Genome NC_045512.2              | (1)     | -----                                                                            |       |       |       |       |       |       |       |
|                                                      |         | Section 177                                                                      |       |       |       |       |       |       |       |
| Candidatus Carsonella ruddii strain BT chromosome... | (13553) | 13553                                                                            | 13563 | 13574 | 13585 | 13596 | 13607 | 13618 | 13629 |
|                                                      | (13553) | TTATGTTAAATACAAGAATAAAACCTTTTAAATCAATAGCTTATTTTGAAAAAAATTTTTTGAAATAAATGAAAAA     |       |       |       |       |       |       |       |
|                                                      | (1)     | -----                                                                            |       |       |       |       |       |       |       |
| Candidatus Carsonella 135557 - 167442nt              | (1)     | -----                                                                            |       |       |       |       |       |       |       |
| SARS-CoV-2 Reference Genome NC_045512.2              | (1)     | -----                                                                            |       |       |       |       |       |       |       |
|                                                      |         | Section 178                                                                      |       |       |       |       |       |       |       |
| Candidatus Carsonella ruddii strain BT chromosome... | (13630) | 13630                                                                            | 13640 | 13651 | 13662 | 13673 | 13684 | 13695 | 13706 |
|                                                      | (13630) | TATTTAAAAAATAAATGGAATGTTTTGTTTTTTTTTCCTTATTCATACTCGTTTATTTGTCTACAGAATTAAAAGA     |       |       |       |       |       |       |       |
|                                                      | (1)     | -----                                                                            |       |       |       |       |       |       |       |
| Candidatus Carsonella 135557 - 167442nt              | (1)     | -----                                                                            |       |       |       |       |       |       |       |
| SARS-CoV-2 Reference Genome NC_045512.2              | (1)     | -----                                                                            |       |       |       |       |       |       |       |
|                                                      |         | Section 179                                                                      |       |       |       |       |       |       |       |
| Candidatus Carsonella ruddii strain BT chromosome... | (13707) | 13707                                                                            | 13717 | 13728 | 13739 | 13750 | 13761 | 13772 | 13783 |
|                                                      | (13707) | TATTTCAAATAATATTTATAATTTTAATAAAAAATAATATAAATATTTATGCAATATCAACTGATAGTCATTTTTTCAC  |       |       |       |       |       |       |       |
|                                                      | (1)     | -----                                                                            |       |       |       |       |       |       |       |
| Candidatus Carsonella 135557 - 167442nt              | (1)     | -----                                                                            |       |       |       |       |       |       |       |
| SARS-CoV-2 Reference Genome NC_045512.2              | (1)     | -----                                                                            |       |       |       |       |       |       |       |
|                                                      |         | Section 180                                                                      |       |       |       |       |       |       |       |
| Candidatus Carsonella ruddii strain BT chromosome... | (13784) | 13784                                                                            | 13794 | 13805 | 13816 | 13827 | 13838 | 13849 | 13860 |
|                                                      | (13784) | AAAAAATTGGATTGAACAAAAATTAACTTCATAAATTTTCCATTTATATCAGATTTTAATCATCAAATTTCTAAA      |       |       |       |       |       |       |       |
|                                                      | (1)     | -----                                                                            |       |       |       |       |       |       |       |
| Candidatus Carsonella 135557 - 167442nt              | (1)     | -----                                                                            |       |       |       |       |       |       |       |
| SARS-CoV-2 Reference Genome NC_045512.2              | (1)     | -----                                                                            |       |       |       |       |       |       |       |

## SARS-CoV-2 &amp; Bakterien.apr

|                                                      |         |                                                                                |       |       |       |       |       |       |       |
|------------------------------------------------------|---------|--------------------------------------------------------------------------------|-------|-------|-------|-------|-------|-------|-------|
|                                                      |         | Section 181                                                                    |       |       |       |       |       |       |       |
| Candidatus Carsonella ruddii strain BT chromosome... | (13861) | 13861                                                                          | 13871 | 13882 | 13893 | 13904 | 13915 | 13926 | 13937 |
|                                                      | (13861) | AATTTAAATATTTTAAATAAAAAAGATGGAAACTGTTTATAGATCAACAATAATTTTAGATCCAAATTTAATTATAAA |       |       |       |       |       |       |       |
|                                                      | (1)     | -----                                                                          |       |       |       |       |       |       |       |
| Candidatus Carsonella 135557 - 167442nt              | (1)     | -----                                                                          |       |       |       |       |       |       |       |
| SARS-CoV-2 Reference Genome NC_045512.2              | (1)     | -----                                                                          |       |       |       |       |       |       |       |
|                                                      |         | Section 182                                                                    |       |       |       |       |       |       |       |
| Candidatus Carsonella ruddii strain BT chromosome... | (13938) | 13938                                                                          | 13948 | 13959 | 13970 | 13981 | 13992 | 14003 | 14014 |
|                                                      | (13938) | ATCAATAGATATTATTGATTCAAATATTTCTAGATGTATAAAAAATATATTGGAAAGATTAAATATGTTAATTTATA  |       |       |       |       |       |       |       |
|                                                      | (1)     | -----                                                                          |       |       |       |       |       |       |       |
| Candidatus Carsonella 135557 - 167442nt              | (1)     | -----                                                                          |       |       |       |       |       |       |       |
| SARS-CoV-2 Reference Genome NC_045512.2              | (1)     | -----                                                                          |       |       |       |       |       |       |       |
|                                                      |         | Section 183                                                                    |       |       |       |       |       |       |       |
| Candidatus Carsonella ruddii strain BT chromosome... | (14015) | 14015                                                                          | 14025 | 14036 | 14047 | 14058 | 14069 | 14080 | 14091 |
|                                                      | (14015) | CTAATTTAAAAACAATGAATTATGTCCTTATAGTTGGAATAACGACAAAATTAGTATTAAAATTGATATTTAAAAA   |       |       |       |       |       |       |       |
|                                                      | (1)     | -----                                                                          |       |       |       |       |       |       |       |
| Candidatus Carsonella 135557 - 167442nt              | (1)     | -----                                                                          |       |       |       |       |       |       |       |
| SARS-CoV-2 Reference Genome NC_045512.2              | (1)     | -----                                                                          |       |       |       |       |       |       |       |
|                                                      |         | Section 184                                                                    |       |       |       |       |       |       |       |
| Candidatus Carsonella ruddii strain BT chromosome... | (14092) | 14092                                                                          | 14102 | 14113 | 14124 | 14135 | 14146 | 14157 | 14168 |
|                                                      | (14092) | TTATTAATTATTAAAGATAATAAATTTATTAAATTATTATGATCTTTTCAAATTGTTTAATTCCATTAAATAATAA   |       |       |       |       |       |       |       |
|                                                      | (1)     | -----                                                                          |       |       |       |       |       |       |       |
| Candidatus Carsonella 135557 - 167442nt              | (1)     | -----                                                                          |       |       |       |       |       |       |       |
| SARS-CoV-2 Reference Genome NC_045512.2              | (1)     | -----                                                                          |       |       |       |       |       |       |       |
|                                                      |         | Section 185                                                                    |       |       |       |       |       |       |       |
| Candidatus Carsonella ruddii strain BT chromosome... | (14169) | 14169                                                                          | 14179 | 14190 | 14201 | 14212 | 14223 | 14234 | 14245 |
|                                                      | (14169) | TATATGAGAAATATTGTTTAATATACTAAAAATAAAAATTTTAAAAAATATTTTTTTTTTATAAATATTATAATTAA  |       |       |       |       |       |       |       |
|                                                      | (1)     | -----                                                                          |       |       |       |       |       |       |       |
| Candidatus Carsonella 135557 - 167442nt              | (1)     | -----                                                                          |       |       |       |       |       |       |       |
| SARS-CoV-2 Reference Genome NC_045512.2              | (1)     | -----                                                                          |       |       |       |       |       |       |       |
|                                                      |         | Section 186                                                                    |       |       |       |       |       |       |       |
| Candidatus Carsonella ruddii strain BT chromosome... | (14246) | 14246                                                                          | 14256 | 14267 | 14278 | 14289 | 14300 | 14311 | 14322 |
|                                                      | (14246) | TATTTTTTTTTTAAAGTTCATCAAAAAAGATGGAGAAATTGTTAAATAATCACAAAAAATAAATTTAAATTTGA     |       |       |       |       |       |       |       |
|                                                      | (1)     | -----                                                                          |       |       |       |       |       |       |       |
| Candidatus Carsonella 135557 - 167442nt              | (1)     | -----                                                                          |       |       |       |       |       |       |       |
| SARS-CoV-2 Reference Genome NC_045512.2              | (1)     | -----                                                                          |       |       |       |       |       |       |       |

## SARS-CoV-2 &amp; Bakterien.apr

|                                                      |         |                                                                                |       |       |       |       |       |       |       |
|------------------------------------------------------|---------|--------------------------------------------------------------------------------|-------|-------|-------|-------|-------|-------|-------|
|                                                      |         | Section 187                                                                    |       |       |       |       |       |       |       |
| Candidatus Carsonella ruddii strain BT chromosome... | (14323) | 14323                                                                          | 14333 | 14344 | 14355 | 14366 | 14377 | 14388 | 14399 |
|                                                      | (14323) | TTTATATTTCTAAAACTTGCTGCCATTATTTTGTTTTAAAAATGAAAAGATTGTTTATAATCATAAATATTTTAAAC  |       |       |       |       |       |       |       |
|                                                      | (1)     | -----                                                                          |       |       |       |       |       |       |       |
| Candidatus Carsonella 135557 - 167442nt              | (1)     | -----                                                                          |       |       |       |       |       |       |       |
| SARS-CoV-2 Reference Genome NC_045512.2              | (1)     | -----                                                                          |       |       |       |       |       |       |       |
|                                                      |         | Section 188                                                                    |       |       |       |       |       |       |       |
| Candidatus Carsonella ruddii strain BT chromosome... | (14400) | 14400                                                                          | 14410 | 14421 | 14432 | 14443 | 14454 | 14465 | 14476 |
|                                                      | (14400) | AAAATTAACTCCAGAATCTAATTTACAAAAATTTTATCACTTATTCTTCCTACAAATGGAGATATTAAATATATGC   |       |       |       |       |       |       |       |
|                                                      | (1)     | -----                                                                          |       |       |       |       |       |       |       |
| Candidatus Carsonella 135557 - 167442nt              | (1)     | -----                                                                          |       |       |       |       |       |       |       |
| SARS-CoV-2 Reference Genome NC_045512.2              | (1)     | -----                                                                          |       |       |       |       |       |       |       |
|                                                      |         | Section 189                                                                    |       |       |       |       |       |       |       |
| Candidatus Carsonella ruddii strain BT chromosome... | (14477) | 14477                                                                          | 14487 | 14498 | 14509 | 14520 | 14531 | 14542 | 14553 |
|                                                      | (14477) | CATTATCGAAACATTTTTTAACTTGATTTCATATCAAAAAATTAATGTTAAATTACATTCTATACCAAATTTTTTAAT |       |       |       |       |       |       |       |
|                                                      | (1)     | -----                                                                          |       |       |       |       |       |       |       |
| Candidatus Carsonella 135557 - 167442nt              | (1)     | -----                                                                          |       |       |       |       |       |       |       |
| SARS-CoV-2 Reference Genome NC_045512.2              | (1)     | -----                                                                          |       |       |       |       |       |       |       |
|                                                      |         | Section 190                                                                    |       |       |       |       |       |       |       |
| Candidatus Carsonella ruddii strain BT chromosome... | (14554) | 14554                                                                          | 14564 | 14575 | 14586 | 14597 | 14608 | 14619 | 14630 |
|                                                      | (14554) | TTACTAGCAGCAATAATACCTGAATCTGTTGCAGGAATTTTAATTAATATTTTTTTATTATTTAAACCAAATAAATT  |       |       |       |       |       |       |       |
|                                                      | (1)     | -----                                                                          |       |       |       |       |       |       |       |
| Candidatus Carsonella 135557 - 167442nt              | (1)     | -----                                                                          |       |       |       |       |       |       |       |
| SARS-CoV-2 Reference Genome NC_045512.2              | (1)     | -----                                                                          |       |       |       |       |       |       |       |
|                                                      |         | Section 191                                                                    |       |       |       |       |       |       |       |
| Candidatus Carsonella ruddii strain BT chromosome... | (14631) | 14631                                                                          | 14641 | 14652 | 14663 | 14674 | 14685 | 14696 | 14707 |
|                                                      | (14631) | ACATAAATAAATCAATTTTTTAGAATAAATTATAATTTTTTTATAATTATAAGATATTCTTGCTGGAATTTCTAAAG  |       |       |       |       |       |       |       |
|                                                      | (1)     | -----                                                                          |       |       |       |       |       |       |       |
| Candidatus Carsonella 135557 - 167442nt              | (1)     | -----                                                                          |       |       |       |       |       |       |       |
| SARS-CoV-2 Reference Genome NC_045512.2              | (1)     | -----                                                                          |       |       |       |       |       |       |       |
|                                                      |         | Section 192                                                                    |       |       |       |       |       |       |       |
| Candidatus Carsonella ruddii strain BT chromosome... | (14708) | 14708                                                                          | 14718 | 14729 | 14740 | 14751 | 14762 | 14773 | 14784 |
|                                                      | (14708) | AAATTTTATCTTTAATAAAAAGGAATTAAATTCCTGCAATAAAAATTAATAAATTATCATAAAACTAATTTCTTCA   |       |       |       |       |       |       |       |
|                                                      | (1)     | -----                                                                          |       |       |       |       |       |       |       |
| Candidatus Carsonella 135557 - 167442nt              | (1)     | -----                                                                          |       |       |       |       |       |       |       |
| SARS-CoV-2 Reference Genome NC_045512.2              | (1)     | -----                                                                          |       |       |       |       |       |       |       |



## SARS-CoV-2 &amp; Bakterien.apr

|                                                      |         |                                                                               |       |       |       |       |       |       |       |
|------------------------------------------------------|---------|-------------------------------------------------------------------------------|-------|-------|-------|-------|-------|-------|-------|
|                                                      |         | Section 193                                                                   |       |       |       |       |       |       |       |
| Candidatus Carsonella ruddii strain BT chromosome... | (14785) | 14785                                                                         | 14795 | 14806 | 14817 | 14828 | 14839 | 14850 | 14861 |
|                                                      | (14785) | TCTGAATCTAATTTTATATTTTATTAAATTTTAAAAAAATTTATTAAATTTTATCATAAGATTTATTTATAAT     |       |       |       |       |       |       |       |
|                                                      | (1)     | -----                                                                         |       |       |       |       |       |       |       |
| Candidatus Carsonella 135557 - 167442nt              | (1)     | -----                                                                         |       |       |       |       |       |       |       |
| SARS-CoV-2 Reference Genome NC_045512.2              | (1)     | -----                                                                         |       |       |       |       |       |       |       |
|                                                      |         | Section 194                                                                   |       |       |       |       |       |       |       |
| Candidatus Carsonella ruddii strain BT chromosome... | (14862) | 14862                                                                         | 14872 | 14883 | 14894 | 14905 | 14916 | 14927 | 14938 |
|                                                      | (14862) | TGAAGATAAAATTAACTTGGATTACTTGTTAAAGAATCAAAATTATACATTTTAAACAAAATTAATGTTTGCGCTAT |       |       |       |       |       |       |       |
|                                                      | (1)     | -----                                                                         |       |       |       |       |       |       |       |
| Candidatus Carsonella 135557 - 167442nt              | (1)     | -----                                                                         |       |       |       |       |       |       |       |
| SARS-CoV-2 Reference Genome NC_045512.2              | (1)     | -----                                                                         |       |       |       |       |       |       |       |
|                                                      |         | Section 195                                                                   |       |       |       |       |       |       |       |
| Candidatus Carsonella ruddii strain BT chromosome... | (14939) | 14939                                                                         | 14949 | 14960 | 14971 | 14982 | 14993 | 15004 | 15015 |
|                                                      | (14939) | CTATTGATATTTTGTATTTTTTTTTTAAAAAATTAAATAAATTCATTTATATTTTAATAATAATTGATATTAATTTG |       |       |       |       |       |       |       |
|                                                      | (1)     | -----                                                                         |       |       |       |       |       |       |       |
| Candidatus Carsonella 135557 - 167442nt              | (1)     | -----                                                                         |       |       |       |       |       |       |       |
| SARS-CoV-2 Reference Genome NC_045512.2              | (1)     | -----                                                                         |       |       |       |       |       |       |       |
|                                                      |         | Section 196                                                                   |       |       |       |       |       |       |       |
| Candidatus Carsonella ruddii strain BT chromosome... | (15016) | 15016                                                                         | 15026 | 15037 | 15048 | 15059 | 15070 | 15081 | 15092 |
|                                                      | (15016) | ATAATTTTAAAAATTTTTTATAATTATAATAATTTTATTTATTAAATAAATAATAAACTTCCGATAACAAAATT    |       |       |       |       |       |       |       |
|                                                      | (1)     | -----                                                                         |       |       |       |       |       |       |       |
| Candidatus Carsonella 135557 - 167442nt              | (1)     | -----                                                                         |       |       |       |       |       |       |       |
| SARS-CoV-2 Reference Genome NC_045512.2              | (1)     | -----                                                                         |       |       |       |       |       |       |       |
|                                                      |         | Section 197                                                                   |       |       |       |       |       |       |       |
| Candidatus Carsonella ruddii strain BT chromosome... | (15093) | 15093                                                                         | 15103 | 15114 | 15125 | 15136 | 15147 | 15158 | 15169 |
|                                                      | (15093) | TTTTACTTTTTTAACATATATTAATAATTTAATATTAGACAAACCAATCCAAATATAAAATTATTTTTAATTTAT   |       |       |       |       |       |       |       |
|                                                      | (1)     | -----                                                                         |       |       |       |       |       |       |       |
| Candidatus Carsonella 135557 - 167442nt              | (1)     | -----                                                                         |       |       |       |       |       |       |       |
| SARS-CoV-2 Reference Genome NC_045512.2              | (1)     | -----                                                                         |       |       |       |       |       |       |       |
|                                                      |         | Section 198                                                                   |       |       |       |       |       |       |       |
| Candidatus Carsonella ruddii strain BT chromosome... | (15170) | 15170                                                                         | 15180 | 15191 | 15202 | 15213 | 15224 | 15235 | 15246 |
|                                                      | (15170) | TTAAATATTTATTTAAATATTTAATATTAATTTTTTATCTCCAGTAATTCCTTTTATATATGAAAAATAATTGTAT  |       |       |       |       |       |       |       |
|                                                      | (1)     | -----                                                                         |       |       |       |       |       |       |       |
| Candidatus Carsonella 135557 - 167442nt              | (1)     | -----                                                                         |       |       |       |       |       |       |       |
| SARS-CoV-2 Reference Genome NC_045512.2              | (1)     | -----                                                                         |       |       |       |       |       |       |       |

## SARS-CoV-2 &amp; Bakterien.apr

|                                                      |         |                                                                              |       |       |       |       |       |       |       |
|------------------------------------------------------|---------|------------------------------------------------------------------------------|-------|-------|-------|-------|-------|-------|-------|
|                                                      |         | Section 199                                                                  |       |       |       |       |       |       |       |
| Candidatus Carsonella ruddii strain BT chromosome... | (15247) | 15247                                                                        | 15257 | 15268 | 15279 | 15290 | 15301 | 15312 | 15323 |
|                                                      | (15247) | TTTATAAAAAAATTATTTAAAAAATATTTTTATTATTGAAATATTGCTAGTTATAAAATTAATAAAATTTATATT  |       |       |       |       |       |       |       |
|                                                      | (1)     | -----                                                                        |       |       |       |       |       |       |       |
| Candidatus Carsonella 135557 - 167442nt              | (1)     | -----                                                                        |       |       |       |       |       |       |       |
| SARS-CoV-2 Reference Genome NC_045512.2              | (1)     | -----                                                                        |       |       |       |       |       |       |       |
|                                                      |         | Section 200                                                                  |       |       |       |       |       |       |       |
| Candidatus Carsonella ruddii strain BT chromosome... | (15324) | 15324                                                                        | 15334 | 15345 | 15356 | 15367 | 15378 | 15389 | 15400 |
|                                                      | (15324) | TTTATTTTTAATTAAAAAATAAATTATAATTACATTCTAAATTATAATCTATTAATAAAATTGAATCAATTTTAA  |       |       |       |       |       |       |       |
|                                                      | (1)     | -----                                                                        |       |       |       |       |       |       |       |
| Candidatus Carsonella 135557 - 167442nt              | (1)     | -----                                                                        |       |       |       |       |       |       |       |
| SARS-CoV-2 Reference Genome NC_045512.2              | (1)     | -----                                                                        |       |       |       |       |       |       |       |
|                                                      |         | Section 201                                                                  |       |       |       |       |       |       |       |
| Candidatus Carsonella ruddii strain BT chromosome... | (15401) | 15401                                                                        | 15411 | 15422 | 15433 | 15444 | 15455 | 15466 | 15477 |
|                                                      | (15401) | CTATATTTAATAAATAAGAAAAATTGAATTCTCCATATTTTAAATAGAATTATAATAACTCATTAATATTAATAAA |       |       |       |       |       |       |       |
|                                                      | (1)     | -----                                                                        |       |       |       |       |       |       |       |
| Candidatus Carsonella 135557 - 167442nt              | (1)     | -----                                                                        |       |       |       |       |       |       |       |
| SARS-CoV-2 Reference Genome NC_045512.2              | (1)     | -----                                                                        |       |       |       |       |       |       |       |
|                                                      |         | Section 202                                                                  |       |       |       |       |       |       |       |
| Candidatus Carsonella ruddii strain BT chromosome... | (15478) | 15478                                                                        | 15488 | 15499 | 15510 | 15521 | 15532 | 15543 | 15554 |
|                                                      | (15478) | CTTGCATTATTTAATAATTTAAAATTAAAAATATTATTTAAATATTTTCAATATTATAATTTTTATTATATATTT  |       |       |       |       |       |       |       |
|                                                      | (1)     | -----                                                                        |       |       |       |       |       |       |       |
| Candidatus Carsonella 135557 - 167442nt              | (1)     | -----                                                                        |       |       |       |       |       |       |       |
| SARS-CoV-2 Reference Genome NC_045512.2              | (1)     | -----                                                                        |       |       |       |       |       |       |       |
|                                                      |         | Section 203                                                                  |       |       |       |       |       |       |       |
| Candidatus Carsonella ruddii strain BT chromosome... | (15555) | 15555                                                                        | 15565 | 15576 | 15587 | 15598 | 15609 | 15620 | 15631 |
|                                                      | (15555) | ATTACTATCATAAATAATATTTCCATCTGCAATTGAATCAACATTGGGTAAACCTACTTCAATAGAACTATTCCAT |       |       |       |       |       |       |       |
|                                                      | (1)     | -----                                                                        |       |       |       |       |       |       |       |
| Candidatus Carsonella 135557 - 167442nt              | (1)     | -----                                                                        |       |       |       |       |       |       |       |
| SARS-CoV-2 Reference Genome NC_045512.2              | (1)     | -----                                                                        |       |       |       |       |       |       |       |
|                                                      |         | Section 204                                                                  |       |       |       |       |       |       |       |
| Candidatus Carsonella ruddii strain BT chromosome... | (15632) | 15632                                                                        | 15642 | 15653 | 15664 | 15675 | 15686 | 15697 | 15708 |
|                                                      | (15632) | ATTTAAAAATTTTTTAAATAAAATTAAAAAATAATTTATTAGGATAATTTAAAGGTAAAAATAAAATTTTTTT    |       |       |       |       |       |       |       |
|                                                      | (1)     | -----                                                                        |       |       |       |       |       |       |       |
| Candidatus Carsonella 135557 - 167442nt              | (1)     | -----                                                                        |       |       |       |       |       |       |       |
| SARS-CoV-2 Reference Genome NC_045512.2              | (1)     | -----                                                                        |       |       |       |       |       |       |       |

## SARS-CoV-2 &amp; Bakterien.apr

|                                                      |         |                                                                                 |       |       |       |       |       |       |       |
|------------------------------------------------------|---------|---------------------------------------------------------------------------------|-------|-------|-------|-------|-------|-------|-------|
|                                                      |         | Section 205                                                                     |       |       |       |       |       |       |       |
| Candidatus Carsonella ruddii strain BT chromosome... | (15709) | 15709                                                                           | 15719 | 15730 | 15741 | 15752 | 15763 | 15774 | 15785 |
|                                                      | (15709) | TTCATAAATCTTTATCTCCTCTTCCACTCATATTAAATTAAAAATTAAATCTTTATAATTTAAAAATTTAGAAAGTTTA |       |       |       |       |       |       |       |
|                                                      | (1)     | -----                                                                           |       |       |       |       |       |       |       |
| Candidatus Carsonella 135557 - 167442nt              | (1)     | -----                                                                           |       |       |       |       |       |       |       |
| SARS-CoV-2 Reference Genome NC_045512.2              | (1)     | -----                                                                           |       |       |       |       |       |       |       |
|                                                      |         | Section 206                                                                     |       |       |       |       |       |       |       |
| Candidatus Carsonella ruddii strain BT chromosome... | (15786) | 15786                                                                           | 15796 | 15807 | 15818 | 15829 | 15840 | 15851 | 15862 |
|                                                      | (15786) | AAAGATAAAAAATAATGAATGAGAAGTTTCTAAAGCAGGAATTATTCCTTCTATTTTTGAAAAAAATTTAAATATATA  |       |       |       |       |       |       |       |
|                                                      | (1)     | -----                                                                           |       |       |       |       |       |       |       |
| Candidatus Carsonella 135557 - 167442nt              | (1)     | -----                                                                           |       |       |       |       |       |       |       |
| SARS-CoV-2 Reference Genome NC_045512.2              | (1)     | -----                                                                           |       |       |       |       |       |       |       |
|                                                      |         | Section 207                                                                     |       |       |       |       |       |       |       |
| Candidatus Carsonella ruddii strain BT chromosome... | (15863) | 15863                                                                           | 15873 | 15884 | 15895 | 15906 | 15917 | 15928 | 15939 |
|                                                      | (15863) | TAAAACTTCATTATTAAAAATAGGAATAAAAAATATTTTATTTTATAGAAAATAAAAAAGAAATTTCTGGACCAATTC  |       |       |       |       |       |       |       |
|                                                      | (1)     | -----                                                                           |       |       |       |       |       |       |       |
| Candidatus Carsonella 135557 - 167442nt              | (1)     | -----                                                                           |       |       |       |       |       |       |       |
| SARS-CoV-2 Reference Genome NC_045512.2              | (1)     | -----                                                                           |       |       |       |       |       |       |       |
|                                                      |         | Section 208                                                                     |       |       |       |       |       |       |       |
| Candidatus Carsonella ruddii strain BT chromosome... | (15940) | 15940                                                                           | 15950 | 15961 | 15972 | 15983 | 15994 | 16005 | 16016 |
|                                                      | (15940) | CTGGATAATCTAAACCAGCAGAAATAGAATTGGTTTTTTTTTATATTTCCATATTTATCTTGTAATAATATAACTATAA |       |       |       |       |       |       |       |
|                                                      | (1)     | -----                                                                           |       |       |       |       |       |       |       |
| Candidatus Carsonella 135557 - 167442nt              | (1)     | -----                                                                           |       |       |       |       |       |       |       |
| SARS-CoV-2 Reference Genome NC_045512.2              | (1)     | -----                                                                           |       |       |       |       |       |       |       |
|                                                      |         | Section 209                                                                     |       |       |       |       |       |       |       |
| Candidatus Carsonella ruddii strain BT chromosome... | (16017) | 16017                                                                           | 16027 | 16038 | 16049 | 16060 | 16071 | 16082 | 16093 |
|                                                      | (16017) | TTACCATGTAATATACCAATGTTTCCAAAAAATACTAGAAAGCTGTTTTTTTTTGTGAAATTCCTCCAGATTCTAC    |       |       |       |       |       |       |       |
|                                                      | (1)     | -----                                                                           |       |       |       |       |       |       |       |
| Candidatus Carsonella 135557 - 167442nt              | (1)     | -----                                                                           |       |       |       |       |       |       |       |
| SARS-CoV-2 Reference Genome NC_045512.2              | (1)     | -----                                                                           |       |       |       |       |       |       |       |
|                                                      |         | Section 210                                                                     |       |       |       |       |       |       |       |
| Candidatus Carsonella ruddii strain BT chromosome... | (16094) | 16094                                                                           | 16104 | 16115 | 16126 | 16137 | 16148 | 16159 | 16170 |
|                                                      | (16094) | AGCTAATAATTTAAATTTTGTATTTATAAAAGGAAAAAAAAATCCTAAACAATTAGAACCACCACCAACACATGCAA   |       |       |       |       |       |       |       |
|                                                      | (1)     | -----                                                                           |       |       |       |       |       |       |       |
| Candidatus Carsonella 135557 - 167442nt              | (1)     | -----                                                                           |       |       |       |       |       |       |       |
| SARS-CoV-2 Reference Genome NC_045512.2              | (1)     | -----                                                                           |       |       |       |       |       |       |       |

|                                                      |         |                                                                                 |       |       |       |       |       |       |             |
|------------------------------------------------------|---------|---------------------------------------------------------------------------------|-------|-------|-------|-------|-------|-------|-------------|
|                                                      |         |                                                                                 |       |       |       |       |       |       | Section 211 |
| Candidatus Carsonella ruddii strain BT chromosome... | (16171) | 16171                                                                           | 16181 | 16192 | 16203 | 16214 | 16225 | 16236 | 16247       |
| Candidatus Carsonella 135557 - 167442nt              | (16171) | TTAAAAATTTTTTTTTTATAAAATTTAAATTAATTTGTTGAAAAATTTTCATATCCTATAATAGATTGAAAATCTCTTT |       |       |       |       |       |       |             |
| SARS-CoV-2 Reference Genome NC_045512.2              | (1)     | -----                                                                           |       |       |       |       |       |       |             |
|                                                      | (1)     | -----                                                                           |       |       |       |       |       |       |             |
|                                                      |         |                                                                                 |       |       |       |       |       |       | Section 212 |
| Candidatus Carsonella ruddii strain BT chromosome... | (16248) | 16248                                                                           | 16258 | 16269 | 16280 | 16291 | 16302 | 16313 | 16324       |
| Candidatus Carsonella 135557 - 167442nt              | (16248) | ACAATTAAAGGATATGGGTGTGGACCCGAAGCTGTTCCAATTAAATAATATGAACTATTTATATTGTTGCACCAATC   |       |       |       |       |       |       |             |
| SARS-CoV-2 Reference Genome NC_045512.2              | (1)     | -----                                                                           |       |       |       |       |       |       |             |
|                                                      | (1)     | -----                                                                           |       |       |       |       |       |       |             |
|                                                      |         |                                                                                 |       |       |       |       |       |       | Section 213 |
| Candidatus Carsonella ruddii strain BT chromosome... | (16325) | 16325                                                                           | 16335 | 16346 | 16357 | 16368 | 16379 | 16390 | 16401       |
| Candidatus Carsonella 135557 - 167442nt              | (16325) | TTTTATTGCTTCATTCATTGCTTCTTTTAAATTTCCATTTGAAATAAGAAAAATTTTACCTCCTAAAAGTTTAATTT   |       |       |       |       |       |       |             |
| SARS-CoV-2 Reference Genome NC_045512.2              | (1)     | -----                                                                           |       |       |       |       |       |       |             |
|                                                      | (1)     | -----                                                                           |       |       |       |       |       |       |             |
|                                                      |         |                                                                                 |       |       |       |       |       |       | Section 214 |
| Candidatus Carsonella ruddii strain BT chromosome... | (16402) | 16402                                                                           | 16412 | 16423 | 16434 | 16445 | 16456 | 16467 | 16478       |
| Candidatus Carsonella 135557 - 167442nt              | (16402) | TTTTAACATTTTATATTTTGTCTTTTATAATCATTTTCTCCCATATATATTATTGATTCTAAATTAAACAAAGAACAT  |       |       |       |       |       |       |             |
| SARS-CoV-2 Reference Genome NC_045512.2              | (1)     | -----                                                                           |       |       |       |       |       |       |             |
|                                                      | (1)     | -----                                                                           |       |       |       |       |       |       |             |
|                                                      |         |                                                                                 |       |       |       |       |       |       | Section 215 |
| Candidatus Carsonella ruddii strain BT chromosome... | (16479) | 16479                                                                           | 16489 | 16500 | 16511 | 16522 | 16533 | 16544 | 16555       |
| Candidatus Carsonella 135557 - 167442nt              | (16479) | GAAGTAGAAGTTGCAACACCGTGCATTCCAGCACCAAGTTTCACATATAATTCTTTTTTTTTTTAAGAAATTTAGCTAA |       |       |       |       |       |       |             |
| SARS-CoV-2 Reference Genome NC_045512.2              | (1)     | -----                                                                           |       |       |       |       |       |       |             |
|                                                      | (1)     | -----                                                                           |       |       |       |       |       |       |             |
|                                                      |         |                                                                                 |       |       |       |       |       |       | Section 216 |
| Candidatus Carsonella ruddii strain BT chromosome... | (16556) | 16556                                                                           | 16566 | 16577 | 16588 | 16599 | 16610 | 16621 | 16632       |
| Candidatus Carsonella 135557 - 167442nt              | (16556) | TAAATTTGTCTCTATTGAATTATTTATTTTATGAGCTCCAGTAAATTTAAATCTTCTCTTTTAAATAAAATTTTGT    |       |       |       |       |       |       |             |
| SARS-CoV-2 Reference Genome NC_045512.2              | (1)     | -----                                                                           |       |       |       |       |       |       |             |
|                                                      | (1)     | -----                                                                           |       |       |       |       |       |       |             |

## SARS-CoV-2 &amp; Bakterien.apr

|                                                      |         |                                                                                 |       |       |       |       |       |       |             |
|------------------------------------------------------|---------|---------------------------------------------------------------------------------|-------|-------|-------|-------|-------|-------|-------------|
|                                                      |         | Section 217                                                                     |       |       |       |       |       |       |             |
|                                                      |         | (16633)                                                                         | 16633 | 16643 | 16654 | 16665 | 16676 | 16687 | 16698 16709 |
| Candidatus Carsonella ruddii strain BT chromosome... | (16633) | ATCCTTTTAATATATTAGAAATATTTTTACAATAATAAATAGGTGTTGGTCTTCCAATAAATAAATTAAAAAATTTT   |       |       |       |       |       |       |             |
| Candidatus Carsonella 135557 - 167442nt              | (1)     | -----                                                                           |       |       |       |       |       |       |             |
| SARS-CoV-2 Reference Genome NC_045512.2              | (1)     | -----                                                                           |       |       |       |       |       |       |             |
|                                                      |         | Section 218                                                                     |       |       |       |       |       |       |             |
|                                                      |         | (16710)                                                                         | 16710 | 16720 | 16731 | 16742 | 16753 | 16764 | 16775 16786 |
| Candidatus Carsonella ruddii strain BT chromosome... | (16710) | AAAATTTCTATTTTAAATTTTTTTTTTTTTTTTATTATTTTAAATAAATTTTAAATAAAGAATTTAATAATGGTTGTAA |       |       |       |       |       |       |             |
| Candidatus Carsonella 135557 - 167442nt              | (1)     | -----                                                                           |       |       |       |       |       |       |             |
| SARS-CoV-2 Reference Genome NC_045512.2              | (1)     | -----                                                                           |       |       |       |       |       |       |             |
|                                                      |         | Section 219                                                                     |       |       |       |       |       |       |             |
|                                                      |         | (16787)                                                                         | 16787 | 16797 | 16808 | 16819 | 16830 | 16841 | 16852 16863 |
| Candidatus Carsonella ruddii strain BT chromosome... | (16787) | CAATTCTGGTAAATATTTACCTCCAAAAATATTAAACATTCTAAATTATTTGGATAAATCATAATAAATTATCTAA    |       |       |       |       |       |       |             |
| Candidatus Carsonella 135557 - 167442nt              | (1)     | -----                                                                           |       |       |       |       |       |       |             |
| SARS-CoV-2 Reference Genome NC_045512.2              | (1)     | -----                                                                           |       |       |       |       |       |       |             |
|                                                      |         | Section 220                                                                     |       |       |       |       |       |       |             |
|                                                      |         | (16864)                                                                         | 16864 | 16874 | 16885 | 16896 | 16907 | 16918 | 16929 16940 |
| Candidatus Carsonella ruddii strain BT chromosome... | (16864) | TTACAACCTTATTCTCACATAAAATGCTACCATAAGTATTAAATAGTTTCACTTTTGAGTTCGGAAAGAGATCATGTG  |       |       |       |       |       |       |             |
| Candidatus Carsonella 135557 - 167442nt              | (1)     | -----                                                                           |       |       |       |       |       |       |             |
| SARS-CoV-2 Reference Genome NC_045512.2              | (1)     | -----                                                                           |       |       |       |       |       |       |             |
|                                                      |         | Section 221                                                                     |       |       |       |       |       |       |             |
|                                                      |         | (16941)                                                                         | 16941 | 16951 | 16962 | 16973 | 16984 | 16995 | 17006 17017 |
| Candidatus Carsonella ruddii strain BT chromosome... | (16941) | TTTCCTATTTATTAAATAATTAGATTATAATTATTAAAAATTTATAGATTAAAACTCACGATAAATTAGTATACATT   |       |       |       |       |       |       |             |
| Candidatus Carsonella 135557 - 167442nt              | (1)     | -----                                                                           |       |       |       |       |       |       |             |
| SARS-CoV-2 Reference Genome NC_045512.2              | (1)     | -----                                                                           |       |       |       |       |       |       |             |
|                                                      |         | Section 222                                                                     |       |       |       |       |       |       |             |
|                                                      |         | (17018)                                                                         | 17018 | 17028 | 17039 | 17050 | 17061 | 17072 | 17083 17094 |
| Candidatus Carsonella ruddii strain BT chromosome... | (17018) | AGCTAAAATATTACTATTTTTACACATTGTATCTATTAACTTATTATATTTAAGTTATCTTAAGAAGAGCAACAAA    |       |       |       |       |       |       |             |
| Candidatus Carsonella 135557 - 167442nt              | (1)     | -----                                                                           |       |       |       |       |       |       |             |
| SARS-CoV-2 Reference Genome NC_045512.2              | (1)     | -----                                                                           |       |       |       |       |       |       |             |

## SARS-CoV-2 &amp; Bakterien.apr

|                                                      |         |                                                                               |       |       |       |       |       |       |       |
|------------------------------------------------------|---------|-------------------------------------------------------------------------------|-------|-------|-------|-------|-------|-------|-------|
|                                                      |         | Section 223                                                                   |       |       |       |       |       |       |       |
| Candidatus Carsonella ruddii strain BT chromosome... | (17095) | 17095                                                                         | 17105 | 17116 | 17127 | 17138 | 17149 | 17160 | 17171 |
|                                                      | (17095) | CTCTTTGGAGATTTTTTTTAAGATATGTTTCCTACTTATATGCTTTCAGTAGTTATCATTTAAACTTAGCTAACCG  |       |       |       |       |       |       |       |
|                                                      | (1)     | -----                                                                         |       |       |       |       |       |       |       |
| Candidatus Carsonella 135557 - 167442nt              | (1)     | -----                                                                         |       |       |       |       |       |       |       |
| SARS-CoV-2 Reference Genome NC_045512.2              | (1)     | -----                                                                         |       |       |       |       |       |       |       |
|                                                      |         | Section 224                                                                   |       |       |       |       |       |       |       |
| Candidatus Carsonella ruddii strain BT chromosome... | (17172) | 17172                                                                         | 17182 | 17193 | 17204 | 17215 | 17226 | 17237 | 17248 |
|                                                      | (17172) | ACTATGCTATTGGTATAACAATCGGAACACCATTGGTTTTACCATCTTGGTCCTCTCGTACTAAAGATAGATTCTTT |       |       |       |       |       |       |       |
|                                                      | (1)     | -----                                                                         |       |       |       |       |       |       |       |
| Candidatus Carsonella 135557 - 167442nt              | (1)     | -----                                                                         |       |       |       |       |       |       |       |
| SARS-CoV-2 Reference Genome NC_045512.2              | (1)     | -----                                                                         |       |       |       |       |       |       |       |
|                                                      |         | Section 225                                                                   |       |       |       |       |       |       |       |
| Candidatus Carsonella ruddii strain BT chromosome... | (17249) | 17249                                                                         | 17259 | 17270 | 17281 | 17292 | 17303 | 17314 | 17325 |
|                                                      | (17249) | CAAAATCTCTACATTTACGGTAGATAGGGACCGAACTGTCTCACGACGTTCTAAACCCAGCTCGCGTACCACTTTAA |       |       |       |       |       |       |       |
|                                                      | (1)     | -----                                                                         |       |       |       |       |       |       |       |
| Candidatus Carsonella 135557 - 167442nt              | (1)     | -----                                                                         |       |       |       |       |       |       |       |
| SARS-CoV-2 Reference Genome NC_045512.2              | (1)     | -----                                                                         |       |       |       |       |       |       |       |
|                                                      |         | Section 226                                                                   |       |       |       |       |       |       |       |
| Candidatus Carsonella ruddii strain BT chromosome... | (17326) | 17326                                                                         | 17336 | 17347 | 17358 | 17369 | 17380 | 17391 | 17402 |
|                                                      | (17326) | ATGGCGAACAGCCATACCCTTGGGACCAACTCCAGCCCCAGGATGTGATGAGCCGACATCGAGGTGCCAAACACTGC |       |       |       |       |       |       |       |
|                                                      | (1)     | -----                                                                         |       |       |       |       |       |       |       |
| Candidatus Carsonella 135557 - 167442nt              | (1)     | -----                                                                         |       |       |       |       |       |       |       |
| SARS-CoV-2 Reference Genome NC_045512.2              | (1)     | -----                                                                         |       |       |       |       |       |       |       |
|                                                      |         | Section 227                                                                   |       |       |       |       |       |       |       |
| Candidatus Carsonella ruddii strain BT chromosome... | (17403) | 17403                                                                         | 17413 | 17424 | 17435 | 17446 | 17457 | 17468 | 17479 |
|                                                      | (17403) | CGTCGATATGGACTCTTGGGCAGTATTAGCCTGTTATCCCCGGAGTACCTTTTATTCGTTGAGCGATAACCTTTCCA |       |       |       |       |       |       |       |
|                                                      | (1)     | -----                                                                         |       |       |       |       |       |       |       |
| Candidatus Carsonella 135557 - 167442nt              | (1)     | -----                                                                         |       |       |       |       |       |       |       |
| SARS-CoV-2 Reference Genome NC_045512.2              | (1)     | -----                                                                         |       |       |       |       |       |       |       |
|                                                      |         | Section 228                                                                   |       |       |       |       |       |       |       |
| Candidatus Carsonella ruddii strain BT chromosome... | (17480) | 17480                                                                         | 17490 | 17501 | 17512 | 17523 | 17534 | 17545 | 17556 |
|                                                      | (17480) | TACAGAATTATCGGATCACTAGAACCTACTTTCGTATCTGTTTGATATGTCTATCTTACAGTTAAGCACTCATATGC |       |       |       |       |       |       |       |
|                                                      | (1)     | -----                                                                         |       |       |       |       |       |       |       |
| Candidatus Carsonella 135557 - 167442nt              | (1)     | -----                                                                         |       |       |       |       |       |       |       |
| SARS-CoV-2 Reference Genome NC_045512.2              | (1)     | -----                                                                         |       |       |       |       |       |       |       |

|                                                      |         |                                                                                 |       |       |       |       |       |             |       |
|------------------------------------------------------|---------|---------------------------------------------------------------------------------|-------|-------|-------|-------|-------|-------------|-------|
|                                                      |         |                                                                                 |       |       |       |       |       | Section 229 |       |
|                                                      | (17557) | 17557                                                                           | 17567 | 17578 | 17589 | 17600 | 17611 | 17622       | 17633 |
| Candidatus Carsonella ruddii strain BT chromosome... | (17557) | TCTTATGCTCAACATACGTTTTCCAAACGTATTGAGAGTACCTTTGTACTCCTCCGTTACTTTTTAGGAGGAGACCG   |       |       |       |       |       |             |       |
| Candidatus Carsonella 135557 - 167442nt              | (1)     | -----                                                                           | ----- | ----- | ----- | ----- | ----- | -----       | ----- |
| SARS-CoV-2 Reference Genome NC_045512.2              | (1)     | -----                                                                           | ----- | ----- | ----- | ----- | ----- | -----       | ----- |
|                                                      |         |                                                                                 |       |       |       |       |       | Section 230 |       |
|                                                      | (17634) | 17634                                                                           | 17644 | 17655 | 17666 | 17677 | 17688 | 17699       | 17710 |
| Candidatus Carsonella ruddii strain BT chromosome... | (17634) | CCCCAGTCAAACCTACCCACCACACATTTTTTATATAATGGATTACAAAAAATATATATTAGAATATCAAAAATTTTA  |       |       |       |       |       |             |       |
| Candidatus Carsonella 135557 - 167442nt              | (1)     | -----                                                                           | ----- | ----- | ----- | ----- | ----- | -----       | ----- |
| SARS-CoV-2 Reference Genome NC_045512.2              | (1)     | -----                                                                           | ----- | ----- | ----- | ----- | ----- | -----       | ----- |
|                                                      |         |                                                                                 |       |       |       |       |       | Section 231 |       |
|                                                      | (17711) | 17711                                                                           | 17721 | 17732 | 17743 | 17754 | 17765 | 17776       | 17787 |
| Candidatus Carsonella ruddii strain BT chromosome... | (17711) | GACTGGTATTTCAAGGTCGACTACTTATAAACTTGGATTTATAGATTAAACATCTCCCAGTTATCCTACACAAAAATT  |       |       |       |       |       |             |       |
| Candidatus Carsonella 135557 - 167442nt              | (1)     | -----                                                                           | ----- | ----- | ----- | ----- | ----- | -----       | ----- |
| SARS-CoV-2 Reference Genome NC_045512.2              | (1)     | -----                                                                           | ----- | ----- | ----- | ----- | ----- | -----       | ----- |
|                                                      |         |                                                                                 |       |       |       |       |       | Section 232 |       |
|                                                      | (17788) | 17788                                                                           | 17798 | 17809 | 17820 | 17831 | 17842 | 17853       | 17864 |
| Candidatus Carsonella ruddii strain BT chromosome... | (17788) | TCCAATATTCAATGTGAAGTTATAGTAAAGGTTACACGGGGTCTTTCCGTCTAGCCGTAAATACACTGCATCTTCACA  |       |       |       |       |       |             |       |
| Candidatus Carsonella 135557 - 167442nt              | (1)     | -----                                                                           | ----- | ----- | ----- | ----- | ----- | -----       | ----- |
| SARS-CoV-2 Reference Genome NC_045512.2              | (1)     | -----                                                                           | ----- | ----- | ----- | ----- | ----- | -----       | ----- |
|                                                      |         |                                                                                 |       |       |       |       |       | Section 233 |       |
|                                                      | (17865) | 17865                                                                           | 17875 | 17886 | 17897 | 17908 | 17919 | 17930       | 17941 |
| Candidatus Carsonella ruddii strain BT chromosome... | (17865) | GCAAATTCAATTTCACTGAGTTCTAAATGGAGACAGCGTGACCATCATTACGCCATTTCGTGCAGGTCGGAACCTTACC |       |       |       |       |       |             |       |
| Candidatus Carsonella 135557 - 167442nt              | (1)     | -----                                                                           | ----- | ----- | ----- | ----- | ----- | -----       | ----- |
| SARS-CoV-2 Reference Genome NC_045512.2              | (1)     | -----                                                                           | ----- | ----- | ----- | ----- | ----- | -----       | ----- |
|                                                      |         |                                                                                 |       |       |       |       |       | Section 234 |       |
|                                                      | (17942) | 17942                                                                           | 17952 | 17963 | 17974 | 17985 | 17996 | 18007       | 18018 |
| Candidatus Carsonella ruddii strain BT chromosome... | (17942) | CGACAAGGAATTTTCGCTACCTTTGGACCGTTATAGTTACGGCCGCCGTTTACTGGGGCTTTTATTAAATGCTTCATT  |       |       |       |       |       |             |       |
| Candidatus Carsonella 135557 - 167442nt              | (1)     | -----                                                                           | ----- | ----- | ----- | ----- | ----- | -----       | ----- |
| SARS-CoV-2 Reference Genome NC_045512.2              | (1)     | -----                                                                           | ----- | ----- | ----- | ----- | ----- | -----       | ----- |

## SARS-CoV-2 &amp; Bakterien.apr

|                                                      |         |                                                                                  |       |       |       |       |       |       |       |
|------------------------------------------------------|---------|----------------------------------------------------------------------------------|-------|-------|-------|-------|-------|-------|-------|
|                                                      |         | Section 235                                                                      |       |       |       |       |       |       |       |
| Candidatus Carsonella ruddii strain BT chromosome... | (18019) | 18019                                                                            | 18029 | 18040 | 18051 | 18062 | 18073 | 18084 | 18095 |
|                                                      | (18019) | TTTATATTAACATTCTCAATTAACCTACCAGCACCGGGCAGGCGTCACACCCCTATACATCCGTTTGACGTTAGCAG    |       |       |       |       |       |       |       |
|                                                      | (1)     | -----                                                                            |       |       |       |       |       |       |       |
| Candidatus Carsonella 135557 - 167442nt              | (1)     | -----                                                                            |       |       |       |       |       |       |       |
| SARS-CoV-2 Reference Genome NC_045512.2              | (1)     | -----                                                                            |       |       |       |       |       |       |       |
|                                                      |         | Section 236                                                                      |       |       |       |       |       |       |       |
| Candidatus Carsonella ruddii strain BT chromosome... | (18096) | 18096                                                                            | 18106 | 18117 | 18128 | 18139 | 18150 | 18161 | 18172 |
|                                                      | (18096) | AGTGCTGTGTTTTTAATAAACAGTTGCAGTCACCTTACCTCTTAGACTAGTTCTTTATAAAAAAATTTACAAATATT    |       |       |       |       |       |       |       |
|                                                      | (1)     | -----                                                                            |       |       |       |       |       |       |       |
| Candidatus Carsonella 135557 - 167442nt              | (1)     | -----                                                                            |       |       |       |       |       |       |       |
| SARS-CoV-2 Reference Genome NC_045512.2              | (1)     | -----                                                                            |       |       |       |       |       |       |       |
|                                                      |         | Section 237                                                                      |       |       |       |       |       |       |       |
| Candidatus Carsonella ruddii strain BT chromosome... | (18173) | 18173                                                                            | 18183 | 18194 | 18205 | 18216 | 18227 | 18238 | 18249 |
|                                                      | (18173) | CTAGTGTATCTTCTCCAAAAGTTACGATACTATTTTGCCTAGTTCCTTCATTTAGATTATCTCATACGCCTTAGTAT    |       |       |       |       |       |       |       |
|                                                      | (1)     | -----                                                                            |       |       |       |       |       |       |       |
| Candidatus Carsonella 135557 - 167442nt              | (1)     | -----                                                                            |       |       |       |       |       |       |       |
| SARS-CoV-2 Reference Genome NC_045512.2              | (1)     | -----                                                                            |       |       |       |       |       |       |       |
|                                                      |         | Section 238                                                                      |       |       |       |       |       |       |       |
| Candidatus Carsonella ruddii strain BT chromosome... | (18250) | 18250                                                                            | 18260 | 18271 | 18282 | 18293 | 18304 | 18315 | 18326 |
|                                                      | (18250) | ACTCTACTTAATTACCTGTGTCGGTTTACGGTACGTACATTAATATGTATTATATTAGAAATTTTCTTGTTAATTT     |       |       |       |       |       |       |       |
|                                                      | (1)     | -----                                                                            |       |       |       |       |       |       |       |
| Candidatus Carsonella 135557 - 167442nt              | (1)     | -----                                                                            |       |       |       |       |       |       |       |
| SARS-CoV-2 Reference Genome NC_045512.2              | (1)     | -----                                                                            |       |       |       |       |       |       |       |
|                                                      |         | Section 239                                                                      |       |       |       |       |       |       |       |
| Candidatus Carsonella ruddii strain BT chromosome... | (18327) | 18327                                                                            | 18337 | 18348 | 18359 | 18370 | 18381 | 18392 | 18403 |
|                                                      | (18327) | AATTTTATTGATTTTTTTTTTATTAATTAATAAAATTAAGTACTAGATTTACTTGGTTAATTATTCCTTTAATTTTAAAC |       |       |       |       |       |       |       |
|                                                      | (1)     | -----                                                                            |       |       |       |       |       |       |       |
| Candidatus Carsonella 135557 - 167442nt              | (1)     | -----                                                                            |       |       |       |       |       |       |       |
| SARS-CoV-2 Reference Genome NC_045512.2              | (1)     | -----                                                                            |       |       |       |       |       |       |       |
|                                                      |         | Section 240                                                                      |       |       |       |       |       |       |       |
| Candidatus Carsonella ruddii strain BT chromosome... | (18404) | 18404                                                                            | 18414 | 18425 | 18436 | 18447 | 18458 | 18469 | 18480 |
|                                                      | (18404) | CTAATATTCCTTTTTTAGGATCAAAAAACAAATTAAGACATTCCATAATTAATATTAATGGTAAAGAAATATTAATC    |       |       |       |       |       |       |       |
|                                                      | (1)     | -----                                                                            |       |       |       |       |       |       |       |
| Candidatus Carsonella 135557 - 167442nt              | (1)     | -----                                                                            |       |       |       |       |       |       |       |
| SARS-CoV-2 Reference Genome NC_045512.2              | (1)     | -----                                                                            |       |       |       |       |       |       |       |



## SARS-CoV-2 &amp; Bakterien.apr

|                                                      |         |                                                                                 |       |       |       |       |       |       |       |
|------------------------------------------------------|---------|---------------------------------------------------------------------------------|-------|-------|-------|-------|-------|-------|-------|
|                                                      |         | Section 241                                                                     |       |       |       |       |       |       |       |
| Candidatus Carsonella ruddii strain BT chromosome... | (18481) | 18481                                                                           | 18491 | 18502 | 18513 | 18524 | 18535 | 18546 | 18557 |
|                                                      | (18481) | TTTTTTCCATCGACTACGTTTTTCAACCTCATCTTAGGTTACGACTAACTCTATTTTCGATCATCGTTGAATAGAAAA  |       |       |       |       |       |       |       |
|                                                      | (1)     | -----                                                                           |       |       |       |       |       |       |       |
| Candidatus Carsonella 135557 - 167442nt              | (1)     | -----                                                                           |       |       |       |       |       |       |       |
| SARS-CoV-2 Reference Genome NC_045512.2              | (1)     | -----                                                                           |       |       |       |       |       |       |       |
|                                                      |         | Section 242                                                                     |       |       |       |       |       |       |       |
| Candidatus Carsonella ruddii strain BT chromosome... | (18558) | 18558                                                                           | 18568 | 18579 | 18590 | 18601 | 18612 | 18623 | 18634 |
|                                                      | (18558) | CCTTAATTTTTTCGGCGGAAATGATTTTCACATTTTCATTTTGTTACTTATGTCAGCATTCGCACTTGTGATGTTTCCA |       |       |       |       |       |       |       |
|                                                      | (1)     | -----                                                                           |       |       |       |       |       |       |       |
| Candidatus Carsonella 135557 - 167442nt              | (1)     | -----                                                                           |       |       |       |       |       |       |       |
| SARS-CoV-2 Reference Genome NC_045512.2              | (1)     | -----                                                                           |       |       |       |       |       |       |       |
|                                                      |         | Section 243                                                                     |       |       |       |       |       |       |       |
| Candidatus Carsonella ruddii strain BT chromosome... | (18635) | 18635                                                                           | 18645 | 18656 | 18667 | 18678 | 18689 | 18700 | 18711 |
|                                                      | (18635) | ATTTATTTTAAATAAATCTTCTTTAACTTACACAACGCTCCTCTACCACAATAATAATGTCCATAATTTCTGGTACT   |       |       |       |       |       |       |       |
|                                                      | (1)     | -----                                                                           |       |       |       |       |       |       |       |
| Candidatus Carsonella 135557 - 167442nt              | (1)     | -----                                                                           |       |       |       |       |       |       |       |
| SARS-CoV-2 Reference Genome NC_045512.2              | (1)     | -----                                                                           |       |       |       |       |       |       |       |
|                                                      |         | Section 244                                                                     |       |       |       |       |       |       |       |
| Candidatus Carsonella ruddii strain BT chromosome... | (18712) | 18712                                                                           | 18722 | 18733 | 18744 | 18755 | 18766 | 18777 | 18788 |
|                                                      | (18712) | TATTTTAGCCCCGTTAAATTTTACGAATAAATCATCTATATCAATGAGCTATTACGCTTTCTTTAAAGGATGGCTGC   |       |       |       |       |       |       |       |
|                                                      | (1)     | -----                                                                           |       |       |       |       |       |       |       |
| Candidatus Carsonella 135557 - 167442nt              | (1)     | -----                                                                           |       |       |       |       |       |       |       |
| SARS-CoV-2 Reference Genome NC_045512.2              | (1)     | -----                                                                           |       |       |       |       |       |       |       |
|                                                      |         | Section 245                                                                     |       |       |       |       |       |       |       |
| Candidatus Carsonella ruddii strain BT chromosome... | (18789) | 18789                                                                           | 18799 | 18810 | 18821 | 18832 | 18843 | 18854 | 18865 |
|                                                      | (18789) | TTCTAAGCCCACCTTTTGATTGTCAAAGATTATTAAATTCATTTTCCACTTAAATAAGATTTAGGGACCTTAATTTA   |       |       |       |       |       |       |       |
|                                                      | (1)     | -----                                                                           |       |       |       |       |       |       |       |
| Candidatus Carsonella 135557 - 167442nt              | (1)     | -----                                                                           |       |       |       |       |       |       |       |
| SARS-CoV-2 Reference Genome NC_045512.2              | (1)     | -----                                                                           |       |       |       |       |       |       |       |
|                                                      |         | Section 246                                                                     |       |       |       |       |       |       |       |
| Candidatus Carsonella ruddii strain BT chromosome... | (18866) | 18866                                                                           | 18876 | 18887 | 18898 | 18909 | 18920 | 18931 | 18942 |
|                                                      | (18866) | TGGTCTGGGTTGTTTCCCTTTTCACTATGGATGTTATCACCCATAGTGTGTCTCCTATAATAAAAAAATTAATATTC   |       |       |       |       |       |       |       |
|                                                      | (1)     | -----                                                                           |       |       |       |       |       |       |       |
| Candidatus Carsonella 135557 - 167442nt              | (1)     | -----                                                                           |       |       |       |       |       |       |       |
| SARS-CoV-2 Reference Genome NC_045512.2              | (1)     | -----                                                                           |       |       |       |       |       |       |       |

## SARS-CoV-2 &amp; Bakterien.apr

|                                                      |         |                                                                                |       |       |       |       |       |       |       |
|------------------------------------------------------|---------|--------------------------------------------------------------------------------|-------|-------|-------|-------|-------|-------|-------|
|                                                      |         | Section 247                                                                    |       |       |       |       |       |       |       |
| Candidatus Carsonella ruddii strain BT chromosome... | (18943) | 18943                                                                          | 18953 | 18964 | 18975 | 18986 | 18997 | 19008 | 19019 |
|                                                      | (18943) | ATAGTTTGTTATGATTCAGAATAATCTTATTCAAAACAGTGCTTTACCATTAATTTTTACTTATAAGGCGCTACCTA  |       |       |       |       |       |       |       |
|                                                      | (1)     | -----                                                                          |       |       |       |       |       |       |       |
| Candidatus Carsonella 135557 - 167442nt              | (1)     | -----                                                                          |       |       |       |       |       |       |       |
| SARS-CoV-2 Reference Genome NC_045512.2              | (1)     | -----                                                                          |       |       |       |       |       |       |       |
|                                                      |         | Section 248                                                                    |       |       |       |       |       |       |       |
| Candidatus Carsonella ruddii strain BT chromosome... | (19020) | 19020                                                                          | 19030 | 19041 | 19052 | 19063 | 19074 | 19085 | 19096 |
|                                                      | (19020) | AATAGCTTTTCGAGGAGAACCAGCTATCTCCGAGCTTGATTAGCCTTTCACCCCTATCCACAAATCATCTGAATCTTT |       |       |       |       |       |       |       |
|                                                      | (1)     | -----                                                                          |       |       |       |       |       |       |       |
| Candidatus Carsonella 135557 - 167442nt              | (1)     | -----                                                                          |       |       |       |       |       |       |       |
| SARS-CoV-2 Reference Genome NC_045512.2              | (1)     | -----                                                                          |       |       |       |       |       |       |       |
|                                                      |         | Section 249                                                                    |       |       |       |       |       |       |       |
| Candidatus Carsonella ruddii strain BT chromosome... | (19097) | 19097                                                                          | 19107 | 19118 | 19129 | 19140 | 19151 | 19162 | 19173 |
|                                                      | (19097) | TGCAACAGATACCAGTTCGGTCCTTCAGTAATTTTTACTTTACCTTCAACCTGTTTATAGATAGATCGCTCGGTTTC  |       |       |       |       |       |       |       |
|                                                      | (1)     | -----                                                                          |       |       |       |       |       |       |       |
| Candidatus Carsonella 135557 - 167442nt              | (1)     | -----                                                                          |       |       |       |       |       |       |       |
| SARS-CoV-2 Reference Genome NC_045512.2              | (1)     | -----                                                                          |       |       |       |       |       |       |       |
|                                                      |         | Section 250                                                                    |       |       |       |       |       |       |       |
| Candidatus Carsonella ruddii strain BT chromosome... | (19174) | 19174                                                                          | 19184 | 19195 | 19206 | 19217 | 19228 | 19239 | 19250 |
|                                                      | (19174) | GGGTCTATTTTTTATAACTTTTCGCCCTTTCAGACTAGATTTCTCTGCGCCTACTTTAAATTAAGCTTGCTAAAAAAA |       |       |       |       |       |       |       |
|                                                      | (1)     | -----                                                                          |       |       |       |       |       |       |       |
| Candidatus Carsonella 135557 - 167442nt              | (1)     | -----                                                                          |       |       |       |       |       |       |       |
| SARS-CoV-2 Reference Genome NC_045512.2              | (1)     | -----                                                                          |       |       |       |       |       |       |       |
|                                                      |         | Section 251                                                                    |       |       |       |       |       |       |       |
| Candidatus Carsonella ruddii strain BT chromosome... | (19251) | 19251                                                                          | 19261 | 19272 | 19283 | 19294 | 19305 | 19316 | 19327 |
|                                                      | (19251) | ATAAGTCGCTGACCCATTATACAAAAGGTATATAGTTACTTTTCAGTTTCTATTGCTTTTACGTATATAATTTTCAGG |       |       |       |       |       |       |       |
|                                                      | (1)     | -----                                                                          |       |       |       |       |       |       |       |
| Candidatus Carsonella 135557 - 167442nt              | (1)     | -----                                                                          |       |       |       |       |       |       |       |
| SARS-CoV-2 Reference Genome NC_045512.2              | (1)     | -----                                                                          |       |       |       |       |       |       |       |
|                                                      |         | Section 252                                                                    |       |       |       |       |       |       |       |
| Candidatus Carsonella ruddii strain BT chromosome... | (19328) | 19328                                                                          | 19338 | 19349 | 19360 | 19371 | 19382 | 19393 | 19404 |
|                                                      | (19328) | TTCTATTTCACTCCTATTTAAAGGTTCTATTTTCATCTTTCCCTCACGGTACTAGTTCACTATCGGTTAATTATTAGT |       |       |       |       |       |       |       |
|                                                      | (1)     | -----                                                                          |       |       |       |       |       |       |       |
| Candidatus Carsonella 135557 - 167442nt              | (1)     | -----                                                                          |       |       |       |       |       |       |       |
| SARS-CoV-2 Reference Genome NC_045512.2              | (1)     | -----                                                                          |       |       |       |       |       |       |       |

## SARS-CoV-2 &amp; Bakterien.apr

|                                                      |         |                                                                                |       |       |       |       |       |       |       |
|------------------------------------------------------|---------|--------------------------------------------------------------------------------|-------|-------|-------|-------|-------|-------|-------|
|                                                      |         | Section 253                                                                    |       |       |       |       |       |       |       |
| Candidatus Carsonella ruddii strain BT chromosome... | (19405) | 19405                                                                          | 19415 | 19426 | 19437 | 19448 | 19459 | 19470 | 19481 |
|                                                      | (19405) | ATTTAGCCTTAGAGGATGGTCCCCCTTTATTCTGTTAAGATTTCACGTGTCTAAACATACTCATAAATAAAAAATA   |       |       |       |       |       |       |       |
|                                                      | (1)     | -----                                                                          |       |       |       |       |       |       |       |
| Candidatus Carsonella 135557 - 167442nt              | (1)     | -----                                                                          |       |       |       |       |       |       |       |
| SARS-CoV-2 Reference Genome NC_045512.2              | (1)     | -----                                                                          |       |       |       |       |       |       |       |
|                                                      |         | Section 254                                                                    |       |       |       |       |       |       |       |
| Candidatus Carsonella ruddii strain BT chromosome... | (19482) | 19482                                                                          | 19492 | 19503 | 19514 | 19525 | 19536 | 19547 | 19558 |
|                                                      | (19482) | AAAAATTATTTAAATAAAAGACTATTACTTTTTATGTTAATTATTCAAAATTATTTAAAGTTTTATTTTTTTTTTT   |       |       |       |       |       |       |       |
|                                                      | (1)     | -----                                                                          |       |       |       |       |       |       |       |
| Candidatus Carsonella 135557 - 167442nt              | (1)     | -----                                                                          |       |       |       |       |       |       |       |
| SARS-CoV-2 Reference Genome NC_045512.2              | (1)     | -----                                                                          |       |       |       |       |       |       |       |
|                                                      |         | Section 255                                                                    |       |       |       |       |       |       |       |
| Candidatus Carsonella ruddii strain BT chromosome... | (19559) | 19559                                                                          | 19569 | 19580 | 19591 | 19602 | 19613 | 19624 | 19635 |
|                                                      | (19559) | GGGCTTTTCTCATTTTCGCTCGCCACTACTATGAGAATCTCATTTGATTTCTTTTCCTTGGATTACTTAGATGTTTCA |       |       |       |       |       |       |       |
|                                                      | (1)     | -----                                                                          |       |       |       |       |       |       |       |
| Candidatus Carsonella 135557 - 167442nt              | (1)     | -----                                                                          |       |       |       |       |       |       |       |
| SARS-CoV-2 Reference Genome NC_045512.2              | (1)     | -----                                                                          |       |       |       |       |       |       |       |
|                                                      |         | Section 256                                                                    |       |       |       |       |       |       |       |
| Candidatus Carsonella ruddii strain BT chromosome... | (19636) | 19636                                                                          | 19646 | 19657 | 19668 | 19679 | 19690 | 19701 | 19712 |
|                                                      | (19636) | GTTTCATCCAGTTTGCGTATTATATACACTAATTTTAATTAGTAGGTTTCCCTATTAAGATACCTTAAAAGATTATCG |       |       |       |       |       |       |       |
|                                                      | (1)     | -----                                                                          |       |       |       |       |       |       |       |
| Candidatus Carsonella 135557 - 167442nt              | (1)     | -----                                                                          |       |       |       |       |       |       |       |
| SARS-CoV-2 Reference Genome NC_045512.2              | (1)     | -----                                                                          |       |       |       |       |       |       |       |
|                                                      |         | Section 257                                                                    |       |       |       |       |       |       |       |
| Candidatus Carsonella ruddii strain BT chromosome... | (19713) | 19713                                                                          | 19723 | 19734 | 19745 | 19756 | 19767 | 19778 | 19789 |
|                                                      | (19713) | CATTTTAGCGTCTGTCATCGCCTATAATTACCTAGACATCCTTTATATACGTTTATTTATTTAATCTATAAATTAA   |       |       |       |       |       |       |       |
|                                                      | (1)     | -----                                                                          |       |       |       |       |       |       |       |
| Candidatus Carsonella 135557 - 167442nt              | (1)     | -----                                                                          |       |       |       |       |       |       |       |
| SARS-CoV-2 Reference Genome NC_045512.2              | (1)     | -----                                                                          |       |       |       |       |       |       |       |
|                                                      |         | Section 258                                                                    |       |       |       |       |       |       |       |
| Candidatus Carsonella ruddii strain BT chromosome... | (19790) | 19790                                                                          | 19800 | 19811 | 19822 | 19833 | 19844 | 19855 | 19866 |
|                                                      | (19790) | TTTTATCATTAATAAAATTTAAAAATATATTTATATATCCAGCCACAGGTTCCCTACAGCTACCTTGTTACGACTT   |       |       |       |       |       |       |       |
|                                                      | (1)     | -----                                                                          |       |       |       |       |       |       |       |
| Candidatus Carsonella 135557 - 167442nt              | (1)     | -----                                                                          |       |       |       |       |       |       |       |
| SARS-CoV-2 Reference Genome NC_045512.2              | (1)     | -----                                                                          |       |       |       |       |       |       |       |

|                                                      |         |                                                                                 |       |       |       |       |       |       |       |
|------------------------------------------------------|---------|---------------------------------------------------------------------------------|-------|-------|-------|-------|-------|-------|-------|
|                                                      |         | Section 259                                                                     |       |       |       |       |       |       |       |
| Candidatus Carsonella ruddii strain BT chromosome... | (19867) | 19867                                                                           | 19877 | 19888 | 19899 | 19910 | 19921 | 19932 | 19943 |
|                                                      | (19867) | CACCCCAGTTACAAATCATACCGTTATAATAATGAAATTATTTATGATACAATTTACTTCCATGGTGTGACGGGCGG   |       |       |       |       |       |       |       |
|                                                      | (1)     | -----                                                                           |       |       |       |       |       |       |       |
| Candidatus Carsonella 135557 - 167442nt              | (1)     | -----                                                                           |       |       |       |       |       |       |       |
| SARS-CoV-2 Reference Genome NC_045512.2              | (1)     | -----                                                                           |       |       |       |       |       |       |       |
|                                                      |         | Section 260                                                                     |       |       |       |       |       |       |       |
| Candidatus Carsonella ruddii strain BT chromosome... | (19944) | 19944                                                                           | 19954 | 19965 | 19976 | 19987 | 19998 | 20009 | 20020 |
|                                                      | (19944) | TGTGTACAAGGCTCGAGAACGTATTCACCGTAACATTCTGATTTACGATTACTAGCGATTCCAACCTTCATAAAATCG  |       |       |       |       |       |       |       |
|                                                      | (1)     | -----                                                                           |       |       |       |       |       |       |       |
| Candidatus Carsonella 135557 - 167442nt              | (1)     | -----                                                                           |       |       |       |       |       |       |       |
| SARS-CoV-2 Reference Genome NC_045512.2              | (1)     | -----                                                                           |       |       |       |       |       |       |       |
|                                                      |         | Section 261                                                                     |       |       |       |       |       |       |       |
| Candidatus Carsonella ruddii strain BT chromosome... | (20021) | 20021                                                                           | 20031 | 20042 | 20053 | 20064 | 20075 | 20086 | 20097 |
|                                                      | (20021) | AGTTACAGATTTTAAATCCGAACCTAAGAGTATGTTTTAAGATTAGCATTATGTTACCATATAGCACAACTTTTTGTTT |       |       |       |       |       |       |       |
|                                                      | (1)     | -----                                                                           |       |       |       |       |       |       |       |
| Candidatus Carsonella 135557 - 167442nt              | (1)     | -----                                                                           |       |       |       |       |       |       |       |
| SARS-CoV-2 Reference Genome NC_045512.2              | (1)     | -----                                                                           |       |       |       |       |       |       |       |
|                                                      |         | Section 262                                                                     |       |       |       |       |       |       |       |
| Candidatus Carsonella ruddii strain BT chromosome... | (20098) | 20098                                                                           | 20108 | 20119 | 20130 | 20141 | 20152 | 20163 | 20174 |
|                                                      | (20098) | TACTCATTGTAGCACGTGTGTAGCCCTACTCATAAGGGCCATGATGACTTGACGTCGTCCTCACCTTCCTCCAATTT   |       |       |       |       |       |       |       |
|                                                      | (1)     | -----                                                                           |       |       |       |       |       |       |       |
| Candidatus Carsonella 135557 - 167442nt              | (1)     | -----                                                                           |       |       |       |       |       |       |       |
| SARS-CoV-2 Reference Genome NC_045512.2              | (1)     | -----                                                                           |       |       |       |       |       |       |       |
|                                                      |         | Section 263                                                                     |       |       |       |       |       |       |       |
| Candidatus Carsonella ruddii strain BT chromosome... | (20175) | 20175                                                                           | 20185 | 20196 | 20207 | 20218 | 20229 | 20240 | 20251 |
|                                                      | (20175) | ATCATAGGCAGTCTCTTATTAGTTCTAAGATTATTTTAGTAATATAAGATAAGGGTTGCGCTCGTTATAGGACTTAA   |       |       |       |       |       |       |       |
|                                                      | (1)     | -----                                                                           |       |       |       |       |       |       |       |
| Candidatus Carsonella 135557 - 167442nt              | (1)     | -----                                                                           |       |       |       |       |       |       |       |
| SARS-CoV-2 Reference Genome NC_045512.2              | (1)     | -----                                                                           |       |       |       |       |       |       |       |
|                                                      |         | Section 264                                                                     |       |       |       |       |       |       |       |
| Candidatus Carsonella ruddii strain BT chromosome... | (20252) | 20252                                                                           | 20262 | 20273 | 20284 | 20295 | 20306 | 20317 | 20328 |
|                                                      | (20252) | CCCAACATTTACAAACACGAGCTGACGACAGCCATGCAGCACCTGTCTCAAAGCTTAAAAGCTTTACTATTTCTAGT   |       |       |       |       |       |       |       |
|                                                      | (1)     | -----                                                                           |       |       |       |       |       |       |       |
| Candidatus Carsonella 135557 - 167442nt              | (1)     | -----                                                                           |       |       |       |       |       |       |       |
| SARS-CoV-2 Reference Genome NC_045512.2              | (1)     | -----                                                                           |       |       |       |       |       |       |       |

## SARS-CoV-2 &amp; Bakterien.apr

|                                                      |         |                                                                                |                       |                       |                       |                       |                       |                       |                       |
|------------------------------------------------------|---------|--------------------------------------------------------------------------------|-----------------------|-----------------------|-----------------------|-----------------------|-----------------------|-----------------------|-----------------------|
|                                                      |         | Section 265                                                                    |                       |                       |                       |                       |                       |                       |                       |
| Candidatus Carsonella ruddii strain BT chromosome... | (20329) | <a href="#">20329</a>                                                          | <a href="#">20339</a> | <a href="#">20350</a> | <a href="#">20361</a> | <a href="#">20372</a> | <a href="#">20383</a> | <a href="#">20394</a> | <a href="#">20405</a> |
|                                                      | (20329) | AAATTCTTTGGATGTCAAGAGTAGGTAAGATTTTTCGTGTTGTATCGAATTAAACCACATGCTCCACCGCTTGTGCG  |                       |                       |                       |                       |                       |                       |                       |
|                                                      | (1)     | -----                                                                          |                       |                       |                       |                       |                       |                       |                       |
| Candidatus Carsonella 135557 - 167442nt              | (1)     | -----                                                                          |                       |                       |                       |                       |                       |                       |                       |
| SARS-CoV-2 Reference Genome NC_045512.2              | (1)     | -----                                                                          |                       |                       |                       |                       |                       |                       |                       |
|                                                      |         | Section 266                                                                    |                       |                       |                       |                       |                       |                       |                       |
| Candidatus Carsonella ruddii strain BT chromosome... | (20406) | <a href="#">20406</a>                                                          | <a href="#">20416</a> | <a href="#">20427</a> | <a href="#">20438</a> | <a href="#">20449</a> | <a href="#">20460</a> | <a href="#">20471</a> | <a href="#">20482</a> |
|                                                      | (20406) | AGCCCCCGTCAATTCATTTGAGTTTTAACCTTGCGGTCGTAATCCCCAGGCGGTCAACTTAACGCGTTAGCTTTTTTC |                       |                       |                       |                       |                       |                       |                       |
|                                                      | (1)     | -----                                                                          |                       |                       |                       |                       |                       |                       |                       |
| Candidatus Carsonella 135557 - 167442nt              | (1)     | -----                                                                          |                       |                       |                       |                       |                       |                       |                       |
| SARS-CoV-2 Reference Genome NC_045512.2              | (1)     | -----                                                                          |                       |                       |                       |                       |                       |                       |                       |
|                                                      |         | Section 267                                                                    |                       |                       |                       |                       |                       |                       |                       |
| Candidatus Carsonella ruddii strain BT chromosome... | (20483) | <a href="#">20483</a>                                                          | <a href="#">20493</a> | <a href="#">20504</a> | <a href="#">20515</a> | <a href="#">20526</a> | <a href="#">20537</a> | <a href="#">20548</a> | <a href="#">20559</a> |
|                                                      | (20483) | ACTAAAAATACATTTTTGAATTAAAAATATTTTTCAAAATATGTTATTTAATAAATAGTTGACATCGTTTACTGCGT  |                       |                       |                       |                       |                       |                       |                       |
|                                                      | (1)     | -----                                                                          |                       |                       |                       |                       |                       |                       |                       |
| Candidatus Carsonella 135557 - 167442nt              | (1)     | -----                                                                          |                       |                       |                       |                       |                       |                       |                       |
| SARS-CoV-2 Reference Genome NC_045512.2              | (1)     | -----                                                                          |                       |                       |                       |                       |                       |                       |                       |
|                                                      |         | Section 268                                                                    |                       |                       |                       |                       |                       |                       |                       |
| Candidatus Carsonella ruddii strain BT chromosome... | (20560) | <a href="#">20560</a>                                                          | <a href="#">20570</a> | <a href="#">20581</a> | <a href="#">20592</a> | <a href="#">20603</a> | <a href="#">20614</a> | <a href="#">20625</a> | <a href="#">20636</a> |
|                                                      | (20560) | GGACTACCAGGGTATCTAATCCTGTTTGCTCCCCACGCTTTCGTGTATCAGTGTCAGTATTAAATAGAAAAACGCC   |                       |                       |                       |                       |                       |                       |                       |
|                                                      | (1)     | -----                                                                          |                       |                       |                       |                       |                       |                       |                       |
| Candidatus Carsonella 135557 - 167442nt              | (1)     | -----                                                                          |                       |                       |                       |                       |                       |                       |                       |
| SARS-CoV-2 Reference Genome NC_045512.2              | (1)     | -----                                                                          |                       |                       |                       |                       |                       |                       |                       |
|                                                      |         | Section 269                                                                    |                       |                       |                       |                       |                       |                       |                       |
| Candidatus Carsonella ruddii strain BT chromosome... | (20637) | <a href="#">20637</a>                                                          | <a href="#">20647</a> | <a href="#">20658</a> | <a href="#">20669</a> | <a href="#">20680</a> | <a href="#">20691</a> | <a href="#">20702</a> | <a href="#">20713</a> |
|                                                      | (20637) | TTCGCCACTAGTATTCTTTTCAGATATCTGAGCATTTCAGTCTACTCCCGAAATTCTAATTTCTTCTTTTATACTCA  |                       |                       |                       |                       |                       |                       |                       |
|                                                      | (1)     | -----                                                                          |                       |                       |                       |                       |                       |                       |                       |
| Candidatus Carsonella 135557 - 167442nt              | (1)     | -----                                                                          |                       |                       |                       |                       |                       |                       |                       |
| SARS-CoV-2 Reference Genome NC_045512.2              | (1)     | -----                                                                          |                       |                       |                       |                       |                       |                       |                       |
|                                                      |         | Section 270                                                                    |                       |                       |                       |                       |                       |                       |                       |
| Candidatus Carsonella ruddii strain BT chromosome... | (20714) | <a href="#">20714</a>                                                          | <a href="#">20724</a> | <a href="#">20735</a> | <a href="#">20746</a> | <a href="#">20757</a> | <a href="#">20768</a> | <a href="#">20779</a> | <a href="#">20790</a> |
|                                                      | (20714) | AGTTTATTAGTATTAATTGCTTTATTAAATTACTTTAATAATTTTAACAAAATTAACCTTTTATAACAACCTACACA  |                       |                       |                       |                       |                       |                       |                       |
|                                                      | (1)     | -----                                                                          |                       |                       |                       |                       |                       |                       |                       |
| Candidatus Carsonella 135557 - 167442nt              | (1)     | -----                                                                          |                       |                       |                       |                       |                       |                       |                       |
| SARS-CoV-2 Reference Genome NC_045512.2              | (1)     | -----                                                                          |                       |                       |                       |                       |                       |                       |                       |

## SARS-CoV-2 &amp; Bakterien.apr

|                                                      |         |                                                                                 |       |       |       |       |       |
|------------------------------------------------------|---------|---------------------------------------------------------------------------------|-------|-------|-------|-------|-------|
| Section 271                                          |         |                                                                                 |       |       |       |       |       |
| Candidatus Carsonella ruddii strain BT chromosome... | (20791) | 20791                                                                           | 20801 | 20812 | 20823 | 20834 | 20845 |
| Candidatus Carsonella 135557 - 167442nt              | (20791) | CCCTTTACGCCCAATAATTTTCGATTAAACGCTTGCACCCCTCGTATTACCGCGGCTGCTGGCACGAAGTTAGCCGGTG |       |       |       |       |       |
| SARS-CoV-2 Reference Genome NC_045512.2              | (1)     | -----                                                                           |       |       |       |       |       |
|                                                      | (1)     | -----                                                                           |       |       |       |       |       |
| Section 272                                          |         |                                                                                 |       |       |       |       |       |
| Candidatus Carsonella ruddii strain BT chromosome... | (20868) | 20868                                                                           | 20878 | 20889 | 20900 | 20911 | 20922 |
| Candidatus Carsonella 135557 - 167442nt              | (20868) | CTTCTTTTACAAATATCGTCAAAAAAAAAAATTTTTTAAATTTTTTATTCTTCTTTCATTGTTGAAAGTGTTTTACA   |       |       |       |       |       |
| SARS-CoV-2 Reference Genome NC_045512.2              | (1)     | -----                                                                           |       |       |       |       |       |
|                                                      | (1)     | -----                                                                           |       |       |       |       |       |
| Section 273                                          |         |                                                                                 |       |       |       |       |       |
| Candidatus Carsonella ruddii strain BT chromosome... | (20945) | 20945                                                                           | 20955 | 20966 | 20977 | 20988 | 20999 |
| Candidatus Carsonella 135557 - 167442nt              | (20945) | ACCCTAAGGCCTTCTTCACACACGCGACATAGCTGGATCAAGCTTTCGCTCATTGTCCAATATTCCTCCACTGCTGCC  |       |       |       |       |       |
| SARS-CoV-2 Reference Genome NC_045512.2              | (1)     | -----                                                                           |       |       |       |       |       |
|                                                      | (1)     | -----                                                                           |       |       |       |       |       |
| Section 274                                          |         |                                                                                 |       |       |       |       |       |
| Candidatus Carsonella ruddii strain BT chromosome... | (21022) | 21022                                                                           | 21032 | 21043 | 21054 | 21065 | 21076 |
| Candidatus Carsonella 135557 - 167442nt              | (21022) | TTCTTTAGAAGTTTGGGCCGTGTCTCAGTCCCAATGTGGTTGTTTCATCCTCTAAGATCAACTACGGATCATAGTCTT  |       |       |       |       |       |
| SARS-CoV-2 Reference Genome NC_045512.2              | (1)     | -----                                                                           |       |       |       |       |       |
|                                                      | (1)     | -----                                                                           |       |       |       |       |       |
| Section 275                                          |         |                                                                                 |       |       |       |       |       |
| Candidatus Carsonella ruddii strain BT chromosome... | (21099) | 21099                                                                           | 21109 | 21120 | 21131 | 21142 | 21153 |
| Candidatus Carsonella 135557 - 167442nt              | (21099) | GTTAAACCTTTACTTTTAAACAATACTAATCCGATACAAGCTCTTCTTTTAGCATATGACTATCTCATACTTTATCC   |       |       |       |       |       |
| SARS-CoV-2 Reference Genome NC_045512.2              | (1)     | -----                                                                           |       |       |       |       |       |
|                                                      | (1)     | -----                                                                           |       |       |       |       |       |
| Section 276                                          |         |                                                                                 |       |       |       |       |       |
| Candidatus Carsonella ruddii strain BT chromosome... | (21176) | 21176                                                                           | 21186 | 21197 | 21208 | 21219 | 21230 |
| Candidatus Carsonella 135557 - 167442nt              | (21176) | ATTAGGATTTATATCGAATTACTATACATTTCTATATACTTTTCGTTACTAAAAGGCAGATTCTTGCAATATTACTCA  |       |       |       |       |       |
| SARS-CoV-2 Reference Genome NC_045512.2              | (1)     | -----                                                                           |       |       |       |       |       |
|                                                      | (1)     | -----                                                                           |       |       |       |       |       |

## SARS-CoV-2 &amp; Bakterien.apr

|                                                      |         |                                                                                 |       |       |       |       |       |       |       |
|------------------------------------------------------|---------|---------------------------------------------------------------------------------|-------|-------|-------|-------|-------|-------|-------|
| Section 277                                          |         |                                                                                 |       |       |       |       |       |       |       |
| Candidatus Carsonella ruddii strain BT chromosome... | (21253) | 21253                                                                           | 21263 | 21274 | 21285 | 21296 | 21307 | 21318 | 21329 |
| Candidatus Carsonella 135557 - 167442nt              | (21253) | CCCGTTTCGCTGCTAATATTTAAATTTCGCACAACTTGCATGTGTTAAGCTTGTCGCCAGCGTTTAATCTGAGCTATGA |       |       |       |       |       |       |       |
| SARS-CoV-2 Reference Genome NC_045512.2              | (1)     | -----                                                                           |       |       |       |       |       |       |       |
|                                                      | (1)     | -----                                                                           |       |       |       |       |       |       |       |
| Section 278                                          |         |                                                                                 |       |       |       |       |       |       |       |
| Candidatus Carsonella ruddii strain BT chromosome... | (21330) | 21330                                                                           | 21340 | 21351 | 21362 | 21373 | 21384 | 21395 | 21406 |
| Candidatus Carsonella 135557 - 167442nt              | (21330) | TCAAACCTCGTAAAACTTTTTTATTATTTAAAAAAATTATTTTAATAAAAAATTTATTTATTAAAAAATTCCTTATAAA |       |       |       |       |       |       |       |
| SARS-CoV-2 Reference Genome NC_045512.2              | (1)     | -----                                                                           |       |       |       |       |       |       |       |
|                                                      | (1)     | -----                                                                           |       |       |       |       |       |       |       |
| Section 279                                          |         |                                                                                 |       |       |       |       |       |       |       |
| Candidatus Carsonella ruddii strain BT chromosome... | (21407) | 21407                                                                           | 21417 | 21428 | 21439 | 21450 | 21461 | 21472 | 21483 |
| Candidatus Carsonella 135557 - 167442nt              | (21407) | GTTAACATTATAAGTTAAAAATTTTAAATAAAATTAAAAATATTATTGTTAATAATATTTTTATAATAATTATTGTTT  |       |       |       |       |       |       |       |
| SARS-CoV-2 Reference Genome NC_045512.2              | (1)     | -----                                                                           |       |       |       |       |       |       |       |
|                                                      | (1)     | -----                                                                           |       |       |       |       |       |       |       |
| Section 280                                          |         |                                                                                 |       |       |       |       |       |       |       |
| Candidatus Carsonella ruddii strain BT chromosome... | (21484) | 21484                                                                           | 21494 | 21505 | 21516 | 21527 | 21538 | 21549 | 21560 |
| Candidatus Carsonella 135557 - 167442nt              | (21484) | AAATTTAATTTTAATATTAACTATCAATATTACTTAAATTAAAAATAAAATTTTTTTTTTGAAAAATAAAAAATTTAGT |       |       |       |       |       |       |       |
| SARS-CoV-2 Reference Genome NC_045512.2              | (1)     | -----                                                                           |       |       |       |       |       |       |       |
|                                                      | (1)     | -----                                                                           |       |       |       |       |       |       |       |
| Section 281                                          |         |                                                                                 |       |       |       |       |       |       |       |
| Candidatus Carsonella ruddii strain BT chromosome... | (21561) | 21561                                                                           | 21571 | 21582 | 21593 | 21604 | 21615 | 21626 | 21637 |
| Candidatus Carsonella 135557 - 167442nt              | (21561) | ATATATTAATTCAGAAATATTAAAAATAAAATTTATTTTGTTTTAAATTAAAAACATTTTTTTTTTATTATAATATTAT |       |       |       |       |       |       |       |
| SARS-CoV-2 Reference Genome NC_045512.2              | (1)     | -----                                                                           |       |       |       |       |       |       |       |
|                                                      | (1)     | -----                                                                           |       |       |       |       |       |       |       |
| Section 282                                          |         |                                                                                 |       |       |       |       |       |       |       |
| Candidatus Carsonella ruddii strain BT chromosome... | (21638) | 21638                                                                           | 21648 | 21659 | 21670 | 21681 | 21692 | 21703 | 21714 |
| Candidatus Carsonella 135557 - 167442nt              | (21638) | TTAAAAATATTAATTGAAAAATTTAATAAAGATTTCTTTTTTTTTTTTGTAATTTAAATTTTTTTAAAAA          |       |       |       |       |       |       |       |
| SARS-CoV-2 Reference Genome NC_045512.2              | (1)     | -----                                                                           |       |       |       |       |       |       |       |
|                                                      | (1)     | -----                                                                           |       |       |       |       |       |       |       |

|                                                      |         |                                                                                |       |       |       |       |       |             |
|------------------------------------------------------|---------|--------------------------------------------------------------------------------|-------|-------|-------|-------|-------|-------------|
|                                                      |         | Section 283                                                                    |       |       |       |       |       |             |
| Candidatus Carsonella ruddii strain BT chromosome... | (21715) | 21715                                                                          | 21725 | 21736 | 21747 | 21758 | 21769 | 21780 21791 |
|                                                      | (21715) | ATTTTTTTTAAAATTAGAAAAAATAAATAAATCATTTTTATTTGTCTTAGACATTTTTTTTTTATTAAAACTATATAA |       |       |       |       |       |             |
|                                                      | (1)     | -----                                                                          |       |       |       |       |       |             |
| Candidatus Carsonella 135557 - 167442nt              | (1)     | -----                                                                          |       |       |       |       |       |             |
| SARS-CoV-2 Reference Genome NC_045512.2              | (1)     | -----                                                                          |       |       |       |       |       |             |
|                                                      |         | Section 284                                                                    |       |       |       |       |       |             |
| Candidatus Carsonella ruddii strain BT chromosome... | (21792) | 21792                                                                          | 21802 | 21813 | 21824 | 21835 | 21846 | 21857 21868 |
|                                                      | (21792) | AATATTGTTATTTATAATAAAATTAGAATTTTAAATTATTTTAAAAATTAATAAATAATTAATTTTGTTTTAAATTT  |       |       |       |       |       |             |
|                                                      | (1)     | -----                                                                          |       |       |       |       |       |             |
| Candidatus Carsonella 135557 - 167442nt              | (1)     | -----                                                                          |       |       |       |       |       |             |
| SARS-CoV-2 Reference Genome NC_045512.2              | (1)     | -----                                                                          |       |       |       |       |       |             |
|                                                      |         | Section 285                                                                    |       |       |       |       |       |             |
| Candidatus Carsonella ruddii strain BT chromosome... | (21869) | 21869                                                                          | 21879 | 21890 | 21901 | 21912 | 21923 | 21934 21945 |
|                                                      | (21869) | TTTTATATAATTCAATATGTTGCAATTGATCTATACCTACAAAAATATATTTGTTGTTATTACAAATAATATCTGAA  |       |       |       |       |       |             |
|                                                      | (1)     | -----                                                                          |       |       |       |       |       |             |
| Candidatus Carsonella 135557 - 167442nt              | (1)     | -----                                                                          |       |       |       |       |       |             |
| SARS-CoV-2 Reference Genome NC_045512.2              | (1)     | -----                                                                          |       |       |       |       |       |             |
|                                                      |         | Section 286                                                                    |       |       |       |       |       |             |
| Candidatus Carsonella ruddii strain BT chromosome... | (21946) | 21946                                                                          | 21956 | 21967 | 21978 | 21989 | 22000 | 22011 22022 |
|                                                      | (21946) | CACATTAAAATAGGATAACAAATTTTACCAAATGAAATTATTTTTTTTTTATATAATGAATGAAAAATTTTCATTTT  |       |       |       |       |       |             |
|                                                      | (1)     | -----                                                                          |       |       |       |       |       |             |
| Candidatus Carsonella 135557 - 167442nt              | (1)     | -----                                                                          |       |       |       |       |       |             |
| SARS-CoV-2 Reference Genome NC_045512.2              | (1)     | -----                                                                          |       |       |       |       |       |             |
|                                                      |         | Section 287                                                                    |       |       |       |       |       |             |
| Candidatus Carsonella ruddii strain BT chromosome... | (22023) | 22023                                                                          | 22033 | 22044 | 22055 | 22066 | 22077 | 22088 22099 |
|                                                      | (22023) | ATTTTTATTATAAATACATAATAATAACCAAAAAAATTTAAAAATTTTTCATTAAAAAGATTGATAAAAAATATAAAT |       |       |       |       |       |             |
|                                                      | (1)     | -----                                                                          |       |       |       |       |       |             |
| Candidatus Carsonella 135557 - 167442nt              | (1)     | -----                                                                          |       |       |       |       |       |             |
| SARS-CoV-2 Reference Genome NC_045512.2              | (1)     | -----                                                                          |       |       |       |       |       |             |
|                                                      |         | Section 288                                                                    |       |       |       |       |       |             |
| Candidatus Carsonella ruddii strain BT chromosome... | (22100) | 22100                                                                          | 22110 | 22121 | 22132 | 22143 | 22154 | 22165 22176 |
|                                                      | (22100) | TTTTAAAAAAGATAAAAAAATAGAAATTAATATTATTTTATTTTAAATATATTTAAATAGATATGTTTTTTGAT     |       |       |       |       |       |             |
|                                                      | (1)     | -----                                                                          |       |       |       |       |       |             |
| Candidatus Carsonella 135557 - 167442nt              | (1)     | -----                                                                          |       |       |       |       |       |             |
| SARS-CoV-2 Reference Genome NC_045512.2              | (1)     | -----                                                                          |       |       |       |       |       |             |



## SARS-CoV-2 &amp; Bakterien.apr

|                                                      |         |                                                                                |                       |                       |                       |                       |                       |                       |                       |
|------------------------------------------------------|---------|--------------------------------------------------------------------------------|-----------------------|-----------------------|-----------------------|-----------------------|-----------------------|-----------------------|-----------------------|
|                                                      |         | Section 289                                                                    |                       |                       |                       |                       |                       |                       |                       |
| Candidatus Carsonella ruddii strain BT chromosome... | (22177) | <a href="#">22177</a>                                                          | <a href="#">22187</a> | <a href="#">22198</a> | <a href="#">22209</a> | <a href="#">22220</a> | <a href="#">22231</a> | <a href="#">22242</a> | <a href="#">22253</a> |
|                                                      | (22177) | AAACTATGTAAATCTGCTATAAAAAATATTTCTATTTTAAAAAATAAGGTTTAATAATACTTAAATAATTTCC      |                       |                       |                       |                       |                       |                       |                       |
|                                                      | (1)     | -----                                                                          |                       |                       |                       |                       |                       |                       |                       |
| Candidatus Carsonella 135557 - 167442nt              | (1)     | -----                                                                          |                       |                       |                       |                       |                       |                       |                       |
| SARS-CoV-2 Reference Genome NC_045512.2              | (1)     | -----                                                                          |                       |                       |                       |                       |                       |                       |                       |
|                                                      |         | Section 290                                                                    |                       |                       |                       |                       |                       |                       |                       |
| Candidatus Carsonella ruddii strain BT chromosome... | (22254) | <a href="#">22254</a>                                                          | <a href="#">22264</a> | <a href="#">22275</a> | <a href="#">22286</a> | <a href="#">22297</a> | <a href="#">22308</a> | <a href="#">22319</a> | <a href="#">22330</a> |
|                                                      | (22254) | AAAGTGTAATAAACCACTTGAATTTATTCCTACAAAAATCATAATTTTCTTCTATAAATAAACTTTTTTTTTTAT    |                       |                       |                       |                       |                       |                       |                       |
|                                                      | (1)     | -----                                                                          |                       |                       |                       |                       |                       |                       |                       |
| Candidatus Carsonella 135557 - 167442nt              | (1)     | -----                                                                          |                       |                       |                       |                       |                       |                       |                       |
| SARS-CoV-2 Reference Genome NC_045512.2              | (1)     | -----                                                                          |                       |                       |                       |                       |                       |                       |                       |
|                                                      |         | Section 291                                                                    |                       |                       |                       |                       |                       |                       |                       |
| Candidatus Carsonella ruddii strain BT chromosome... | (22331) | <a href="#">22331</a>                                                          | <a href="#">22341</a> | <a href="#">22352</a> | <a href="#">22363</a> | <a href="#">22374</a> | <a href="#">22385</a> | <a href="#">22396</a> | <a href="#">22407</a> |
|                                                      | (22331) | AATTGGATCAAATTTAATAATTTTAATTTTTTATTATTTTTTTTATTTTTTTTTTAAATATAAAAAATAACAACCTTA |                       |                       |                       |                       |                       |                       |                       |
|                                                      | (1)     | -----                                                                          |                       |                       |                       |                       |                       |                       |                       |
| Candidatus Carsonella 135557 - 167442nt              | (1)     | -----                                                                          |                       |                       |                       |                       |                       |                       |                       |
| SARS-CoV-2 Reference Genome NC_045512.2              | (1)     | -----                                                                          |                       |                       |                       |                       |                       |                       |                       |
|                                                      |         | Section 292                                                                    |                       |                       |                       |                       |                       |                       |                       |
| Candidatus Carsonella ruddii strain BT chromosome... | (22408) | <a href="#">22408</a>                                                          | <a href="#">22418</a> | <a href="#">22429</a> | <a href="#">22440</a> | <a href="#">22451</a> | <a href="#">22462</a> | <a href="#">22473</a> | <a href="#">22484</a> |
|                                                      | (22408) | AACTACTTTTCAATTTTATTAAATATACATTTTTTAATTATTTTTATTGATTTAGAAGAAATTTAATTTTGTTAA    |                       |                       |                       |                       |                       |                       |                       |
|                                                      | (1)     | -----                                                                          |                       |                       |                       |                       |                       |                       |                       |
| Candidatus Carsonella 135557 - 167442nt              | (1)     | -----                                                                          |                       |                       |                       |                       |                       |                       |                       |
| SARS-CoV-2 Reference Genome NC_045512.2              | (1)     | -----                                                                          |                       |                       |                       |                       |                       |                       |                       |
|                                                      |         | Section 293                                                                    |                       |                       |                       |                       |                       |                       |                       |
| Candidatus Carsonella ruddii strain BT chromosome... | (22485) | <a href="#">22485</a>                                                          | <a href="#">22495</a> | <a href="#">22506</a> | <a href="#">22517</a> | <a href="#">22528</a> | <a href="#">22539</a> | <a href="#">22550</a> | <a href="#">22561</a> |
|                                                      | (22485) | ATTTATTTTTTACCCAAATAATTTGTTTGTTAAATTAATTTTAGAAAAACATTTATTTTAAATATTAGAATGAGAA   |                       |                       |                       |                       |                       |                       |                       |
|                                                      | (1)     | -----                                                                          |                       |                       |                       |                       |                       |                       |                       |
| Candidatus Carsonella 135557 - 167442nt              | (1)     | -----                                                                          |                       |                       |                       |                       |                       |                       |                       |
| SARS-CoV-2 Reference Genome NC_045512.2              | (1)     | -----                                                                          |                       |                       |                       |                       |                       |                       |                       |
|                                                      |         | Section 294                                                                    |                       |                       |                       |                       |                       |                       |                       |
| Candidatus Carsonella ruddii strain BT chromosome... | (22562) | <a href="#">22562</a>                                                          | <a href="#">22572</a> | <a href="#">22583</a> | <a href="#">22594</a> | <a href="#">22605</a> | <a href="#">22616</a> | <a href="#">22627</a> | <a href="#">22638</a> |
|                                                      | (22562) | ACTTTACATTTTGTAATTTTTTTTTTTTTTTGTTAAATACAAATATTAGACATTTTTTTTTTTTTTAATTCTTATTT  |                       |                       |                       |                       |                       |                       |                       |
|                                                      | (1)     | -----                                                                          |                       |                       |                       |                       |                       |                       |                       |
| Candidatus Carsonella 135557 - 167442nt              | (1)     | -----                                                                          |                       |                       |                       |                       |                       |                       |                       |
| SARS-CoV-2 Reference Genome NC_045512.2              | (1)     | -----                                                                          |                       |                       |                       |                       |                       |                       |                       |

## SARS-CoV-2 &amp; Bakterien.apr

|                                                      |         |                                                                                   |                       |                       |                       |                       |                       |                       |                       |
|------------------------------------------------------|---------|-----------------------------------------------------------------------------------|-----------------------|-----------------------|-----------------------|-----------------------|-----------------------|-----------------------|-----------------------|
| Section 295                                          |         |                                                                                   |                       |                       |                       |                       |                       |                       |                       |
| Candidatus Carsonella ruddii strain BT chromosome... | (22639) | <a href="#">22639</a>                                                             | <a href="#">22649</a> | <a href="#">22660</a> | <a href="#">22671</a> | <a href="#">22682</a> | <a href="#">22693</a> | <a href="#">22704</a> | <a href="#">22715</a> |
| Candidatus Carsonella 135557 - 167442nt              | (22639) | TTTCTATAGACATATTAAAAATATAACTTAATTCTTTATATGGAATTTTATATTCTTTAAAAATTTCTGTATAAAAAA    |                       |                       |                       |                       |                       |                       |                       |
| SARS-CoV-2 Reference Genome NC_045512.2              | (1)     | -----                                                                             |                       |                       |                       |                       |                       |                       |                       |
|                                                      | (1)     | -----                                                                             |                       |                       |                       |                       |                       |                       |                       |
| Section 296                                          |         |                                                                                   |                       |                       |                       |                       |                       |                       |                       |
| Candidatus Carsonella ruddii strain BT chromosome... | (22716) | <a href="#">22716</a>                                                             | <a href="#">22726</a> | <a href="#">22737</a> | <a href="#">22748</a> | <a href="#">22759</a> | <a href="#">22770</a> | <a href="#">22781</a> | <a href="#">22792</a> |
| Candidatus Carsonella 135557 - 167442nt              | (22716) | ACTTCTTTTTCAAATTTAAATACTTTTTTTTTTATTAAAAATAATTTTTTGTTTTATTAAAAATAATTTTTTATTTTATC  |                       |                       |                       |                       |                       |                       |                       |
| SARS-CoV-2 Reference Genome NC_045512.2              | (1)     | -----                                                                             |                       |                       |                       |                       |                       |                       |                       |
|                                                      | (1)     | -----                                                                             |                       |                       |                       |                       |                       |                       |                       |
| Section 297                                          |         |                                                                                   |                       |                       |                       |                       |                       |                       |                       |
| Candidatus Carsonella ruddii strain BT chromosome... | (22793) | <a href="#">22793</a>                                                             | <a href="#">22803</a> | <a href="#">22814</a> | <a href="#">22825</a> | <a href="#">22836</a> | <a href="#">22847</a> | <a href="#">22858</a> | <a href="#">22869</a> |
| Candidatus Carsonella 135557 - 167442nt              | (22793) | AAAAAAAGTATTTATTTTATTCCATAAAATGGATTAAAAATAATTTAACGATTTTTTAAAAATTGTTATAATAATTTA    |                       |                       |                       |                       |                       |                       |                       |
| SARS-CoV-2 Reference Genome NC_045512.2              | (1)     | -----                                                                             |                       |                       |                       |                       |                       |                       |                       |
|                                                      | (1)     | -----                                                                             |                       |                       |                       |                       |                       |                       |                       |
| Section 298                                          |         |                                                                                   |                       |                       |                       |                       |                       |                       |                       |
| Candidatus Carsonella ruddii strain BT chromosome... | (22870) | <a href="#">22870</a>                                                             | <a href="#">22880</a> | <a href="#">22891</a> | <a href="#">22902</a> | <a href="#">22913</a> | <a href="#">22924</a> | <a href="#">22935</a> | <a href="#">22946</a> |
| Candidatus Carsonella 135557 - 167442nt              | (22870) | AAATATCTATTTTTTTCATTTTTTAATATTTTTTAAATTTTTTCGTATATAATTTTGTTAAAAAAATTTTATTTTTTAAAT |                       |                       |                       |                       |                       |                       |                       |
| SARS-CoV-2 Reference Genome NC_045512.2              | (1)     | -----                                                                             |                       |                       |                       |                       |                       |                       |                       |
|                                                      | (1)     | -----                                                                             |                       |                       |                       |                       |                       |                       |                       |
| Section 299                                          |         |                                                                                   |                       |                       |                       |                       |                       |                       |                       |
| Candidatus Carsonella ruddii strain BT chromosome... | (22947) | <a href="#">22947</a>                                                             | <a href="#">22957</a> | <a href="#">22968</a> | <a href="#">22979</a> | <a href="#">22990</a> | <a href="#">23001</a> | <a href="#">23012</a> | <a href="#">23023</a> |
| Candidatus Carsonella 135557 - 167442nt              | (22947) | AAATAAAAAATTTAAATTTAATAAATATTCATTATATTTTCATAAAATTTTTTAAATATGTTTTATTTTAAATAAAATC   |                       |                       |                       |                       |                       |                       |                       |
| SARS-CoV-2 Reference Genome NC_045512.2              | (1)     | -----                                                                             |                       |                       |                       |                       |                       |                       |                       |
|                                                      | (1)     | -----                                                                             |                       |                       |                       |                       |                       |                       |                       |
| Section 300                                          |         |                                                                                   |                       |                       |                       |                       |                       |                       |                       |
| Candidatus Carsonella ruddii strain BT chromosome... | (23024) | <a href="#">23024</a>                                                             | <a href="#">23034</a> | <a href="#">23045</a> | <a href="#">23056</a> | <a href="#">23067</a> | <a href="#">23078</a> | <a href="#">23089</a> | <a href="#">23100</a> |
| Candidatus Carsonella 135557 - 167442nt              | (23024) | ATAATAATTCTATCGATTCCCACACCAACTCCATTAGTATTATATAAACAATTTTTTAAATTTAATTAAAAAATCTTT    |                       |                       |                       |                       |                       |                       |                       |
| SARS-CoV-2 Reference Genome NC_045512.2              | (1)     | -----                                                                             |                       |                       |                       |                       |                       |                       |                       |
|                                                      | (1)     | -----                                                                             |                       |                       |                       |                       |                       |                       |                       |

|                                                      |         |                                                                                 |                       |                       |                       |                       |                       |                       |                       |
|------------------------------------------------------|---------|---------------------------------------------------------------------------------|-----------------------|-----------------------|-----------------------|-----------------------|-----------------------|-----------------------|-----------------------|
| Section 301                                          |         |                                                                                 |                       |                       |                       |                       |                       |                       |                       |
| Candidatus Carsonella ruddii strain BT chromosome... | (23101) | <a href="#">23101</a>                                                           | <a href="#">23111</a> | <a href="#">23122</a> | <a href="#">23133</a> | <a href="#">23144</a> | <a href="#">23155</a> | <a href="#">23166</a> | <a href="#">23177</a> |
| Candidatus Carsonella 135557 - 167442nt              | (23101) | ATTTTTTTTAAATAAAATTTTTTTTTTGTATATAATAATCATTTAATTCATCAAATCCATTAGAAATTTCTATTTCCTG |                       |                       |                       |                       |                       |                       |                       |
| SARS-CoV-2 Reference Genome NC_045512.2              | (1)     | -----                                                                           |                       |                       |                       |                       |                       |                       |                       |
|                                                      | (1)     | -----                                                                           |                       |                       |                       |                       |                       |                       |                       |
| Section 302                                          |         |                                                                                 |                       |                       |                       |                       |                       |                       |                       |
| Candidatus Carsonella ruddii strain BT chromosome... | (23178) | <a href="#">23178</a>                                                           | <a href="#">23188</a> | <a href="#">23199</a> | <a href="#">23210</a> | <a href="#">23221</a> | <a href="#">23232</a> | <a href="#">23243</a> | <a href="#">23254</a> |
| Candidatus Carsonella 135557 - 167442nt              | (23178) | AAATAAATAATTCAAATCTTTTTGAATAATTTAAATTTGTTATAATATTTTTTGTAAAGGACTACTTTTTGTAGGA    |                       |                       |                       |                       |                       |                       |                       |
| SARS-CoV-2 Reference Genome NC_045512.2              | (1)     | -----                                                                           |                       |                       |                       |                       |                       |                       |                       |
|                                                      | (1)     | -----                                                                           |                       |                       |                       |                       |                       |                       |                       |
| Section 303                                          |         |                                                                                 |                       |                       |                       |                       |                       |                       |                       |
| Candidatus Carsonella ruddii strain BT chromosome... | (23255) | <a href="#">23255</a>                                                           | <a href="#">23265</a> | <a href="#">23276</a> | <a href="#">23287</a> | <a href="#">23298</a> | <a href="#">23309</a> | <a href="#">23320</a> | <a href="#">23331</a> |
| Candidatus Carsonella 135557 - 167442nt              | (23255) | AAAAATTTAATAAAAAATAGGAAAAATTAATTTTTTTTTTATTTTATCATCAAAAAATTTTAAATAAAATATCACTTAA |                       |                       |                       |                       |                       |                       |                       |
| SARS-CoV-2 Reference Genome NC_045512.2              | (1)     | -----                                                                           |                       |                       |                       |                       |                       |                       |                       |
|                                                      | (1)     | -----                                                                           |                       |                       |                       |                       |                       |                       |                       |
| Section 304                                          |         |                                                                                 |                       |                       |                       |                       |                       |                       |                       |
| Candidatus Carsonella ruddii strain BT chromosome... | (23332) | <a href="#">23332</a>                                                           | <a href="#">23342</a> | <a href="#">23353</a> | <a href="#">23364</a> | <a href="#">23375</a> | <a href="#">23386</a> | <a href="#">23397</a> | <a href="#">23408</a> |
| Candidatus Carsonella 135557 - 167442nt              | (23332) | AAAATAATTTTTTATATTGTTTATTCCTTTATAATAACAAAAATAAAAAAATTTTTTTTTTATTTATTAAAAAAAATT  |                       |                       |                       |                       |                       |                       |                       |
| SARS-CoV-2 Reference Genome NC_045512.2              | (1)     | -----                                                                           |                       |                       |                       |                       |                       |                       |                       |
|                                                      | (1)     | -----                                                                           |                       |                       |                       |                       |                       |                       |                       |
| Section 305                                          |         |                                                                                 |                       |                       |                       |                       |                       |                       |                       |
| Candidatus Carsonella ruddii strain BT chromosome... | (23409) | <a href="#">23409</a>                                                           | <a href="#">23419</a> | <a href="#">23430</a> | <a href="#">23441</a> | <a href="#">23452</a> | <a href="#">23463</a> | <a href="#">23474</a> | <a href="#">23485</a> |
| Candidatus Carsonella 135557 - 167442nt              | (23409) | TTTTTTTTTTTAAATAAAATAAAAAATAATTTCTAATAAACTTATTTTTTTAAAAAATAAATTATAATTAAAAATTAAA |                       |                       |                       |                       |                       |                       |                       |
| SARS-CoV-2 Reference Genome NC_045512.2              | (1)     | -----                                                                           |                       |                       |                       |                       |                       |                       |                       |
|                                                      | (1)     | -----                                                                           |                       |                       |                       |                       |                       |                       |                       |
| Section 306                                          |         |                                                                                 |                       |                       |                       |                       |                       |                       |                       |
| Candidatus Carsonella ruddii strain BT chromosome... | (23486) | <a href="#">23486</a>                                                           | <a href="#">23496</a> | <a href="#">23507</a> | <a href="#">23518</a> | <a href="#">23529</a> | <a href="#">23540</a> | <a href="#">23551</a> | <a href="#">23562</a> |
| Candidatus Carsonella 135557 - 167442nt              | (23486) | TTAAAAATTTCTATAAAATAATAATTTGTTATTAAAAATAAATTTTTTTAAAAATTTTTTCAACAAAAACAAAGAATC  |                       |                       |                       |                       |                       |                       |                       |
| SARS-CoV-2 Reference Genome NC_045512.2              | (1)     | -----                                                                           |                       |                       |                       |                       |                       |                       |                       |
|                                                      | (1)     | -----                                                                           |                       |                       |                       |                       |                       |                       |                       |

|                                                      |         |                                                                                 |                       |                       |                       |                       |                       |                       |                       |
|------------------------------------------------------|---------|---------------------------------------------------------------------------------|-----------------------|-----------------------|-----------------------|-----------------------|-----------------------|-----------------------|-----------------------|
| Section 307                                          |         |                                                                                 |                       |                       |                       |                       |                       |                       |                       |
| Candidatus Carsonella ruddii strain BT chromosome... | (23563) | <a href="#">23563</a>                                                           | <a href="#">23573</a> | <a href="#">23584</a> | <a href="#">23595</a> | <a href="#">23606</a> | <a href="#">23617</a> | <a href="#">23628</a> | <a href="#">23639</a> |
| Candidatus Carsonella 135557 - 167442nt              | (23563) | TTTAAATTTAAATTTAGATGAATAATATTCTAACATATTAAATTCAAAATAATGAATATTAGAACATCCTTCATTTT   |                       |                       |                       |                       |                       |                       |                       |
| SARS-CoV-2 Reference Genome NC_045512.2              | (1)     | -----                                                                           |                       |                       |                       |                       |                       |                       |                       |
|                                                      | (1)     | -----                                                                           |                       |                       |                       |                       |                       |                       |                       |
| Section 308                                          |         |                                                                                 |                       |                       |                       |                       |                       |                       |                       |
| Candidatus Carsonella ruddii strain BT chromosome... | (23640) | <a href="#">23640</a>                                                           | <a href="#">23650</a> | <a href="#">23661</a> | <a href="#">23672</a> | <a href="#">23683</a> | <a href="#">23694</a> | <a href="#">23705</a> | <a href="#">23716</a> |
| Candidatus Carsonella 135557 - 167442nt              | (23640) | TATAACATTTTGTATATCAAAAAGTCTATTATAATTATTTGATAAAATTTTTTTTATATAAAATTCTGGAGAAATT    |                       |                       |                       |                       |                       |                       |                       |
| SARS-CoV-2 Reference Genome NC_045512.2              | (1)     | -----                                                                           |                       |                       |                       |                       |                       |                       |                       |
|                                                      | (1)     | -----                                                                           |                       |                       |                       |                       |                       |                       |                       |
| Section 309                                          |         |                                                                                 |                       |                       |                       |                       |                       |                       |                       |
| Candidatus Carsonella ruddii strain BT chromosome... | (23717) | <a href="#">23717</a>                                                           | <a href="#">23727</a> | <a href="#">23738</a> | <a href="#">23749</a> | <a href="#">23760</a> | <a href="#">23771</a> | <a href="#">23782</a> | <a href="#">23793</a> |
| Candidatus Carsonella 135557 - 167442nt              | (23717) | TTTAAATAAAAAAATTTTTTTTACAAAAATTATAAGTTTTTAAATATATTAGAATATGAATTTGATTTATTTTACA    |                       |                       |                       |                       |                       |                       |                       |
| SARS-CoV-2 Reference Genome NC_045512.2              | (1)     | -----                                                                           |                       |                       |                       |                       |                       |                       |                       |
|                                                      | (1)     | -----                                                                           |                       |                       |                       |                       |                       |                       |                       |
| Section 310                                          |         |                                                                                 |                       |                       |                       |                       |                       |                       |                       |
| Candidatus Carsonella ruddii strain BT chromosome... | (23794) | <a href="#">23794</a>                                                           | <a href="#">23804</a> | <a href="#">23815</a> | <a href="#">23826</a> | <a href="#">23837</a> | <a href="#">23848</a> | <a href="#">23859</a> | <a href="#">23870</a> |
| Candidatus Carsonella 135557 - 167442nt              | (23794) | AAAATTACTAGAATTAATATTTATAAACATAAATTTTTTAAATAAATTGTTTAAAAAATTAATAACACAAAATTTTT   |                       |                       |                       |                       |                       |                       |                       |
| SARS-CoV-2 Reference Genome NC_045512.2              | (1)     | -----                                                                           |                       |                       |                       |                       |                       |                       |                       |
|                                                      | (1)     | -----                                                                           |                       |                       |                       |                       |                       |                       |                       |
| Section 311                                          |         |                                                                                 |                       |                       |                       |                       |                       |                       |                       |
| Candidatus Carsonella ruddii strain BT chromosome... | (23871) | <a href="#">23871</a>                                                           | <a href="#">23881</a> | <a href="#">23892</a> | <a href="#">23903</a> | <a href="#">23914</a> | <a href="#">23925</a> | <a href="#">23936</a> | <a href="#">23947</a> |
| Candidatus Carsonella 135557 - 167442nt              | (23871) | TTTTTATTAAAAAATTATTACTTTTATGAAAAGATAAAGTTTTTACGACTAACTTAATAAAAAACGGTATTATAAAA   |                       |                       |                       |                       |                       |                       |                       |
| SARS-CoV-2 Reference Genome NC_045512.2              | (1)     | -----                                                                           |                       |                       |                       |                       |                       |                       |                       |
|                                                      | (1)     | -----                                                                           |                       |                       |                       |                       |                       |                       |                       |
| Section 312                                          |         |                                                                                 |                       |                       |                       |                       |                       |                       |                       |
| Candidatus Carsonella ruddii strain BT chromosome... | (23948) | <a href="#">23948</a>                                                           | <a href="#">23958</a> | <a href="#">23969</a> | <a href="#">23980</a> | <a href="#">23991</a> | <a href="#">24002</a> | <a href="#">24013</a> | <a href="#">24024</a> |
| Candidatus Carsonella 135557 - 167442nt              | (23948) | ATTATTTTTTTTTTTGTTTTTTTAAATTTTACCATAAACAAATTAATATATCACCAATTGAAAATTTTTCATTAGAATA |                       |                       |                       |                       |                       |                       |                       |
| SARS-CoV-2 Reference Genome NC_045512.2              | (1)     | -----                                                                           |                       |                       |                       |                       |                       |                       |                       |
|                                                      | (1)     | -----                                                                           |                       |                       |                       |                       |                       |                       |                       |

|                                                      |         |                                                                                  |                       |                       |                       |                       |                       |                       |                       |
|------------------------------------------------------|---------|----------------------------------------------------------------------------------|-----------------------|-----------------------|-----------------------|-----------------------|-----------------------|-----------------------|-----------------------|
| Section 313                                          |         |                                                                                  |                       |                       |                       |                       |                       |                       |                       |
| Candidatus Carsonella ruddii strain BT chromosome... | (24025) | <a href="#">24025</a>                                                            | <a href="#">24035</a> | <a href="#">24046</a> | <a href="#">24057</a> | <a href="#">24068</a> | <a href="#">24079</a> | <a href="#">24090</a> | <a href="#">24101</a> |
| Candidatus Carsonella 135557 - 167442nt              | (24025) | AATTTGTATTATTCCTGAATAATCTTTTAATTCTATAAAAAGGTTTTTTGATTCTATTTACTTTTCCGTAAATAATTT   |                       |                       |                       |                       |                       |                       |                       |
| SARS-CoV-2 Reference Genome NC_045512.2              | (1)     | -----                                                                            |                       |                       |                       |                       |                       |                       |                       |
|                                                      | (1)     | -----                                                                            |                       |                       |                       |                       |                       |                       |                       |
| Section 314                                          |         |                                                                                  |                       |                       |                       |                       |                       |                       |                       |
| Candidatus Carsonella ruddii strain BT chromosome... | (24102) | <a href="#">24102</a>                                                            | <a href="#">24112</a> | <a href="#">24123</a> | <a href="#">24134</a> | <a href="#">24145</a> | <a href="#">24156</a> | <a href="#">24167</a> | <a href="#">24178</a> |
| Candidatus Carsonella 135557 - 167442nt              | (24102) | TAAATTTTTTTAAATTTATAATCATATTATTATAAAATTTATTTTCATATTTAAAAAATTTATTTAAATTATATTTTT   |                       |                       |                       |                       |                       |                       |                       |
| SARS-CoV-2 Reference Genome NC_045512.2              | (1)     | -----                                                                            |                       |                       |                       |                       |                       |                       |                       |
|                                                      | (1)     | -----                                                                            |                       |                       |                       |                       |                       |                       |                       |
| Section 315                                          |         |                                                                                  |                       |                       |                       |                       |                       |                       |                       |
| Candidatus Carsonella ruddii strain BT chromosome... | (24179) | <a href="#">24179</a>                                                            | <a href="#">24189</a> | <a href="#">24200</a> | <a href="#">24211</a> | <a href="#">24222</a> | <a href="#">24233</a> | <a href="#">24244</a> | <a href="#">24255</a> |
| Candidatus Carsonella 135557 - 167442nt              | (24179) | GATTATTAATATGATTATAATAAAATTTATTTTCAAAATGATAAGTTTTTATATATTTTTTTTTCTAAATTTTTTAAAA  |                       |                       |                       |                       |                       |                       |                       |
| SARS-CoV-2 Reference Genome NC_045512.2              | (1)     | -----                                                                            |                       |                       |                       |                       |                       |                       |                       |
|                                                      | (1)     | -----                                                                            |                       |                       |                       |                       |                       |                       |                       |
| Section 316                                          |         |                                                                                  |                       |                       |                       |                       |                       |                       |                       |
| Candidatus Carsonella ruddii strain BT chromosome... | (24256) | <a href="#">24256</a>                                                            | <a href="#">24266</a> | <a href="#">24277</a> | <a href="#">24288</a> | <a href="#">24299</a> | <a href="#">24310</a> | <a href="#">24321</a> | <a href="#">24332</a> |
| Candidatus Carsonella 135557 - 167442nt              | (24256) | TAATTATTAAAATTTAAATTTTTTTTTTCAAAAAAATTTAAATTTCTAAAATTTTTTAAAGCAAAATTTTTATTTTTTAA |                       |                       |                       |                       |                       |                       |                       |
| SARS-CoV-2 Reference Genome NC_045512.2              | (1)     | -----                                                                            |                       |                       |                       |                       |                       |                       |                       |
|                                                      | (1)     | -----                                                                            |                       |                       |                       |                       |                       |                       |                       |
| Section 317                                          |         |                                                                                  |                       |                       |                       |                       |                       |                       |                       |
| Candidatus Carsonella ruddii strain BT chromosome... | (24333) | <a href="#">24333</a>                                                            | <a href="#">24343</a> | <a href="#">24354</a> | <a href="#">24365</a> | <a href="#">24376</a> | <a href="#">24387</a> | <a href="#">24398</a> | <a href="#">24409</a> |
| Candidatus Carsonella 135557 - 167442nt              | (24333) | TTGAGATCTTTTCAGATTGACAACCTAACAACAATATTTGTAGGAATATGTTTTATTCTTATTGCAGAATTTGTATTAT  |                       |                       |                       |                       |                       |                       |                       |
| SARS-CoV-2 Reference Genome NC_045512.2              | (1)     | -----                                                                            |                       |                       |                       |                       |                       |                       |                       |
|                                                      | (1)     | -----                                                                            |                       |                       |                       |                       |                       |                       |                       |
| Section 318                                          |         |                                                                                  |                       |                       |                       |                       |                       |                       |                       |
| Candidatus Carsonella ruddii strain BT chromosome... | (24410) | <a href="#">24410</a>                                                            | <a href="#">24420</a> | <a href="#">24431</a> | <a href="#">24442</a> | <a href="#">24453</a> | <a href="#">24464</a> | <a href="#">24475</a> | <a href="#">24486</a> |
| Candidatus Carsonella 135557 - 167442nt              | (24410) | TTACATGTTGTCCTCCTGGACCTTTAGATTTAAACCTTTCAATAATAATATCTTCTTTATTAAAAAATTTTTTTCT     |                       |                       |                       |                       |                       |                       |                       |
| SARS-CoV-2 Reference Genome NC_045512.2              | (1)     | -----                                                                            |                       |                       |                       |                       |                       |                       |                       |
|                                                      | (1)     | -----                                                                            |                       |                       |                       |                       |                       |                       |                       |

## SARS-CoV-2 &amp; Bakterien.apr

|                                                      |         |                                                                                |                       |                       |                       |                       |                       |                       |                       |
|------------------------------------------------------|---------|--------------------------------------------------------------------------------|-----------------------|-----------------------|-----------------------|-----------------------|-----------------------|-----------------------|-----------------------|
| Section 319                                          |         |                                                                                |                       |                       |                       |                       |                       |                       |                       |
| Candidatus Carsonella ruddii strain BT chromosome... | (24487) | <a href="#">24487</a>                                                          | <a href="#">24497</a> | <a href="#">24508</a> | <a href="#">24519</a> | <a href="#">24530</a> | <a href="#">24541</a> | <a href="#">24552</a> | <a href="#">24563</a> |
| Candidatus Carsonella 135557 - 167442nt              | (24487) | TTATTAATTTTAGGAATAACAATTATATTTATATATGAAGTTTGTATTTTATTATTTGTTGTTATAGGATTTTTTCT  |                       |                       |                       |                       |                       |                       |                       |
| SARS-CoV-2 Reference Genome NC_045512.2              | (1)     | -----                                                                          |                       |                       |                       |                       |                       |                       |                       |
|                                                      | (1)     | -----                                                                          |                       |                       |                       |                       |                       |                       |                       |
| Section 320                                          |         |                                                                                |                       |                       |                       |                       |                       |                       |                       |
| Candidatus Carsonella ruddii strain BT chromosome... | (24564) | <a href="#">24564</a>                                                          | <a href="#">24574</a> | <a href="#">24585</a> | <a href="#">24596</a> | <a href="#">24607</a> | <a href="#">24618</a> | <a href="#">24629</a> | <a href="#">24640</a> |
| Candidatus Carsonella 135557 - 167442nt              | (24564) | CATTATTCTATGTATACCAGATTCATTTTTTAATAATAAAAAGGAATAAATATCATCTATAAAAAATTAAAGATTTTT |                       |                       |                       |                       |                       |                       |                       |
| SARS-CoV-2 Reference Genome NC_045512.2              | (1)     | -----                                                                          |                       |                       |                       |                       |                       |                       |                       |
|                                                      | (1)     | -----                                                                          |                       |                       |                       |                       |                       |                       |                       |
| Section 321                                          |         |                                                                                |                       |                       |                       |                       |                       |                       |                       |
| Candidatus Carsonella ruddii strain BT chromosome... | (24641) | <a href="#">24641</a>                                                          | <a href="#">24651</a> | <a href="#">24662</a> | <a href="#">24673</a> | <a href="#">24684</a> | <a href="#">24695</a> | <a href="#">24706</a> | <a href="#">24717</a> |
| Candidatus Carsonella 135557 - 167442nt              | (24641) | TATATCCATAATCATTATTTTCAAATAAATAATTTCCACATTAAATTTATTTTTTTTAAACCATTTATAATAAAAA   |                       |                       |                       |                       |                       |                       |                       |
| SARS-CoV-2 Reference Genome NC_045512.2              | (1)     | -----                                                                          |                       |                       |                       |                       |                       |                       |                       |
|                                                      | (1)     | -----                                                                          |                       |                       |                       |                       |                       |                       |                       |
| Section 322                                          |         |                                                                                |                       |                       |                       |                       |                       |                       |                       |
| Candidatus Carsonella ruddii strain BT chromosome... | (24718) | <a href="#">24718</a>                                                          | <a href="#">24728</a> | <a href="#">24739</a> | <a href="#">24750</a> | <a href="#">24761</a> | <a href="#">24772</a> | <a href="#">24783</a> | <a href="#">24794</a> |
| Candidatus Carsonella 135557 - 167442nt              | (24718) | TCTGTAAAAAATTTAACTAATTGGTATGTTTCTATTCTCCAGCATTAGGATAAATTTCTATATAACATTTACAAAT   |                       |                       |                       |                       |                       |                       |                       |
| SARS-CoV-2 Reference Genome NC_045512.2              | (1)     | -----                                                                          |                       |                       |                       |                       |                       |                       |                       |
|                                                      | (1)     | -----                                                                          |                       |                       |                       |                       |                       |                       |                       |
| Section 323                                          |         |                                                                                |                       |                       |                       |                       |                       |                       |                       |
| Candidatus Carsonella ruddii strain BT chromosome... | (24795) | <a href="#">24795</a>                                                          | <a href="#">24805</a> | <a href="#">24816</a> | <a href="#">24827</a> | <a href="#">24838</a> | <a href="#">24849</a> | <a href="#">24860</a> | <a href="#">24871</a> |
| Candidatus Carsonella 135557 - 167442nt              | (24795) | TGAATAATTTTCAATTTTTTTTTTCAATATAAGATTTAATGTTATTATAATCATTAATATTATATACAGAAAAATTAT |                       |                       |                       |                       |                       |                       |                       |
| SARS-CoV-2 Reference Genome NC_045512.2              | (1)     | -----                                                                          |                       |                       |                       |                       |                       |                       |                       |
|                                                      | (1)     | -----                                                                          |                       |                       |                       |                       |                       |                       |                       |
| Section 324                                          |         |                                                                                |                       |                       |                       |                       |                       |                       |                       |
| Candidatus Carsonella ruddii strain BT chromosome... | (24872) | <a href="#">24872</a>                                                          | <a href="#">24882</a> | <a href="#">24893</a> | <a href="#">24904</a> | <a href="#">24915</a> | <a href="#">24926</a> | <a href="#">24937</a> | <a href="#">24948</a> |
| Candidatus Carsonella 135557 - 167442nt              | (24872) | TTTTAAAAATAAATTCAATATATTTATTTTAAATTAAATTATAATACATTACAATTGTTTTTTTATAAAATTTATTA  |                       |                       |                       |                       |                       |                       |                       |
| SARS-CoV-2 Reference Genome NC_045512.2              | (1)     | -----                                                                          |                       |                       |                       |                       |                       |                       |                       |
|                                                      | (1)     | -----                                                                          |                       |                       |                       |                       |                       |                       |                       |

|                                                      |         |                                                                                 |       |       |       |       |       |
|------------------------------------------------------|---------|---------------------------------------------------------------------------------|-------|-------|-------|-------|-------|
| Section 325                                          |         |                                                                                 |       |       |       |       |       |
| Candidatus Carsonella ruddii strain BT chromosome... | (24949) | 24949                                                                           | 24959 | 24970 | 24981 | 24992 | 25003 |
| Candidatus Carsonella 135557 - 167442nt              | (24949) | AAATATTAAAATTTTGAGAAAAAATTTTATATTTTTCATTTAACAAAAATAATTTTTTAATATTTAATTTAATTTTT   |       |       |       |       |       |
| SARS-CoV-2 Reference Genome NC_045512.2              | (1)     | -----                                                                           |       |       |       |       |       |
|                                                      | (1)     | -----                                                                           |       |       |       |       |       |
| Section 326                                          |         |                                                                                 |       |       |       |       |       |
| Candidatus Carsonella ruddii strain BT chromosome... | (25026) | 25026                                                                           | 25036 | 25047 | 25058 | 25069 | 25080 |
| Candidatus Carsonella 135557 - 167442nt              | (25026) | AAATTAGGTATTATTTTTTAAATCGCAAAAAATAATTTAATAGGATAAGAGGTAGAAACAACAATATTATTTTTTTT   |       |       |       |       |       |
| SARS-CoV-2 Reference Genome NC_045512.2              | (1)     | -----                                                                           |       |       |       |       |       |
|                                                      | (1)     | -----                                                                           |       |       |       |       |       |
| Section 327                                          |         |                                                                                 |       |       |       |       |       |
| Candidatus Carsonella ruddii strain BT chromosome... | (25103) | 25103                                                                           | 25113 | 25124 | 25135 | 25146 | 25157 |
| Candidatus Carsonella 135557 - 167442nt              | (25103) | TTCATTTTTTAATTAATGATGTTAATGATGTAATGGTATGAGGATCGTGAATTTTTTTATATTTATTATAAAAAATATT |       |       |       |       |       |
| SARS-CoV-2 Reference Genome NC_045512.2              | (1)     | -----                                                                           |       |       |       |       |       |
|                                                      | (1)     | -----                                                                           |       |       |       |       |       |
| Section 328                                          |         |                                                                                 |       |       |       |       |       |
| Candidatus Carsonella ruddii strain BT chromosome... | (25180) | 25180                                                                           | 25190 | 25201 | 25212 | 25223 | 25234 |
| Candidatus Carsonella 135557 - 167442nt              | (25180) | CAATAGAATTAATAATAATTTTATTATTAATTTTATCAGAAAAAAAACTTTTATTAATATTATTTCATTTGATTATTT  |       |       |       |       |       |
| SARS-CoV-2 Reference Genome NC_045512.2              | (1)     | -----                                                                           |       |       |       |       |       |
|                                                      | (1)     | -----                                                                           |       |       |       |       |       |
| Section 329                                          |         |                                                                                 |       |       |       |       |       |
| Candidatus Carsonella ruddii strain BT chromosome... | (25257) | 25257                                                                           | 25267 | 25278 | 25289 | 25300 | 25311 |
| Candidatus Carsonella 135557 - 167442nt              | (25257) | TTTAAATTATTATTATTAACCTAATCTTAAAAAATTAGATGGAATAGAAATATCTATTGATGGTGAAATTGTTTTTTT  |       |       |       |       |       |
| SARS-CoV-2 Reference Genome NC_045512.2              | (1)     | -----                                                                           |       |       |       |       |       |
|                                                      | (1)     | -----                                                                           |       |       |       |       |       |
| Section 330                                          |         |                                                                                 |       |       |       |       |       |
| Candidatus Carsonella ruddii strain BT chromosome... | (25334) | 25334                                                                           | 25344 | 25355 | 25366 | 25377 | 25388 |
| Candidatus Carsonella 135557 - 167442nt              | (25334) | TAAAGAATAATTTTTTAATTATATTATTTTTTAATAAAATTATCTAAAAAATTATTATCATTGTACAAGTTATAATTT  |       |       |       |       |       |
| SARS-CoV-2 Reference Genome NC_045512.2              | (1)     | -----                                                                           |       |       |       |       |       |
|                                                      | (1)     | -----                                                                           |       |       |       |       |       |

|                                                                                                                                            |         |                                                                                  |                       |                       |                       |                       |                       |                       |                       |
|--------------------------------------------------------------------------------------------------------------------------------------------|---------|----------------------------------------------------------------------------------|-----------------------|-----------------------|-----------------------|-----------------------|-----------------------|-----------------------|-----------------------|
|                                                                                                                                            |         |                                                                                  |                       |                       |                       |                       |                       |                       | Section 331           |
| Candidatus Carsonella ruddii strain BT chromosome...<br>Candidatus Carsonella 135557 - 167442nt<br>SARS-CoV-2 Reference Genome NC_045512.2 | (25411) | <a href="#">25411</a>                                                            | <a href="#">25421</a> | <a href="#">25432</a> | <a href="#">25443</a> | <a href="#">25454</a> | <a href="#">25465</a> | <a href="#">25476</a> | <a href="#">25487</a> |
|                                                                                                                                            | (25411) | TTTCAATTGGAAAACCTAATTTTTTTAGCTATAAAAGCAGATAGAGAATTACCAAAATTTCCAGATGGAATTATAAAA   |                       |                       |                       |                       |                       |                       |                       |
|                                                                                                                                            | (1)     | -----                                                                            |                       |                       |                       |                       |                       |                       |                       |
|                                                                                                                                            | (1)     | -----                                                                            |                       |                       |                       |                       |                       |                       |                       |
|                                                                                                                                            |         |                                                                                  |                       |                       |                       |                       |                       |                       | Section 332           |
| Candidatus Carsonella ruddii strain BT chromosome...<br>Candidatus Carsonella 135557 - 167442nt<br>SARS-CoV-2 Reference Genome NC_045512.2 | (25488) | <a href="#">25488</a>                                                            | <a href="#">25498</a> | <a href="#">25509</a> | <a href="#">25520</a> | <a href="#">25531</a> | <a href="#">25542</a> | <a href="#">25553</a> | <a href="#">25564</a> |
|                                                                                                                                            | (25488) | TTTACATAATTATTTTTTATAAACATTTAATGAACAATAACAATAATAAATTGTTTGAAAAATTATTCTAAACCAATT   |                       |                       |                       |                       |                       |                       |                       |
|                                                                                                                                            | (1)     | -----                                                                            |                       |                       |                       |                       |                       |                       |                       |
|                                                                                                                                            | (1)     | -----                                                                            |                       |                       |                       |                       |                       |                       |                       |
|                                                                                                                                            |         |                                                                                  |                       |                       |                       |                       |                       |                       | Section 333           |
| Candidatus Carsonella ruddii strain BT chromosome...<br>Candidatus Carsonella 135557 - 167442nt<br>SARS-CoV-2 Reference Genome NC_045512.2 | (25565) | <a href="#">25565</a>                                                            | <a href="#">25575</a> | <a href="#">25586</a> | <a href="#">25597</a> | <a href="#">25608</a> | <a href="#">25619</a> | <a href="#">25630</a> | <a href="#">25641</a> |
|                                                                                                                                            | (25565) | TATAGAATTAACAGATATTAAAAAATTTTTTTATTATTTTTTAATATTTTCAAATATTTTTTTAATTAAAAATTGAG    |                       |                       |                       |                       |                       |                       |                       |
|                                                                                                                                            | (1)     | -----                                                                            |                       |                       |                       |                       |                       |                       |                       |
|                                                                                                                                            | (1)     | -----                                                                            |                       |                       |                       |                       |                       |                       |                       |
|                                                                                                                                            |         |                                                                                  |                       |                       |                       |                       |                       |                       | Section 334           |
| Candidatus Carsonella ruddii strain BT chromosome...<br>Candidatus Carsonella 135557 - 167442nt<br>SARS-CoV-2 Reference Genome NC_045512.2 | (25642) | <a href="#">25642</a>                                                            | <a href="#">25652</a> | <a href="#">25663</a> | <a href="#">25674</a> | <a href="#">25685</a> | <a href="#">25696</a> | <a href="#">25707</a> | <a href="#">25718</a> |
|                                                                                                                                            | (25642) | AAGTATCAAAATTTCTCTAAAATTGAAATATTTTTTAATATTATTTTTTAATTAAAGTAGTAATTTGTTTTCTTTGAATA |                       |                       |                       |                       |                       |                       |                       |
|                                                                                                                                            | (1)     | -----                                                                            |                       |                       |                       |                       |                       |                       |                       |
|                                                                                                                                            | (1)     | -----                                                                            |                       |                       |                       |                       |                       |                       |                       |
|                                                                                                                                            |         |                                                                                  |                       |                       |                       |                       |                       |                       | Section 335           |
| Candidatus Carsonella ruddii strain BT chromosome...<br>Candidatus Carsonella 135557 - 167442nt<br>SARS-CoV-2 Reference Genome NC_045512.2 | (25719) | <a href="#">25719</a>                                                            | <a href="#">25729</a> | <a href="#">25740</a> | <a href="#">25751</a> | <a href="#">25762</a> | <a href="#">25773</a> | <a href="#">25784</a> | <a href="#">25795</a> |
|                                                                                                                                            | (25719) | TTTGAAATCATATTAAATGGATAAAAAAGTAAATAATTTAATTTTTTCAAAATTTTAAAAAGAATTATTAGCTGAGGA   |                       |                       |                       |                       |                       |                       |                       |
|                                                                                                                                            | (1)     | -----                                                                            |                       |                       |                       |                       |                       |                       |                       |
|                                                                                                                                            | (1)     | -----                                                                            |                       |                       |                       |                       |                       |                       |                       |
|                                                                                                                                            |         |                                                                                  |                       |                       |                       |                       |                       |                       | Section 336           |
| Candidatus Carsonella ruddii strain BT chromosome...<br>Candidatus Carsonella 135557 - 167442nt<br>SARS-CoV-2 Reference Genome NC_045512.2 | (25796) | <a href="#">25796</a>                                                            | <a href="#">25806</a> | <a href="#">25817</a> | <a href="#">25828</a> | <a href="#">25839</a> | <a href="#">25850</a> | <a href="#">25861</a> | <a href="#">25872</a> |
|                                                                                                                                            | (25796) | ACCAGTATCTCCTGAAGTAGCACAAAAAATTAATAATTTTTTTATTAATTTTTTTTGAAAAAAATTTAATATATTTTC   |                       |                       |                       |                       |                       |                       |                       |
|                                                                                                                                            | (1)     | -----                                                                            |                       |                       |                       |                       |                       |                       |                       |
|                                                                                                                                            | (1)     | -----                                                                            |                       |                       |                       |                       |                       |                       |                       |



|                                                      |         |                                                                                |                       |                       |                       |                       |                       |                       |                       |
|------------------------------------------------------|---------|--------------------------------------------------------------------------------|-----------------------|-----------------------|-----------------------|-----------------------|-----------------------|-----------------------|-----------------------|
| Section 337                                          |         |                                                                                |                       |                       |                       |                       |                       |                       |                       |
| Candidatus Carsonella ruddii strain BT chromosome... | (25873) | <a href="#">25873</a>                                                          | <a href="#">25883</a> | <a href="#">25894</a> | <a href="#">25905</a> | <a href="#">25916</a> | <a href="#">25927</a> | <a href="#">25938</a> | <a href="#">25949</a> |
| Candidatus Carsonella 135557 - 167442nt              | (25873) | CTAAAGGAATCATAGCTATATCTTTAAAAGTTAAAGTAGGGCCATTATTTTAAATTTAATAAAAAATTATTATTAAAT |                       |                       |                       |                       |                       |                       |                       |
| SARS-CoV-2 Reference Genome NC_045512.2              | (1)     | -----                                                                          |                       |                       |                       |                       |                       |                       |                       |
|                                                      | (1)     | -----                                                                          |                       |                       |                       |                       |                       |                       |                       |
| Section 338                                          |         |                                                                                |                       |                       |                       |                       |                       |                       |                       |
| Candidatus Carsonella ruddii strain BT chromosome... | (25950) | <a href="#">25950</a>                                                          | <a href="#">25960</a> | <a href="#">25971</a> | <a href="#">25982</a> | <a href="#">25993</a> | <a href="#">26004</a> | <a href="#">26015</a> | <a href="#">26026</a> |
| Candidatus Carsonella 135557 - 167442nt              | (25950) | ATTTTTTCAATATTTTAAACTAAATTAAAATTAAAATTAAAATAACTTTTATTAATTATATTATATAAAATTTCTTC  |                       |                       |                       |                       |                       |                       |                       |
| SARS-CoV-2 Reference Genome NC_045512.2              | (1)     | -----                                                                          |                       |                       |                       |                       |                       |                       |                       |
|                                                      | (1)     | -----                                                                          |                       |                       |                       |                       |                       |                       |                       |
| Section 339                                          |         |                                                                                |                       |                       |                       |                       |                       |                       |                       |
| Candidatus Carsonella ruddii strain BT chromosome... | (26027) | <a href="#">26027</a>                                                          | <a href="#">26037</a> | <a href="#">26048</a> | <a href="#">26059</a> | <a href="#">26070</a> | <a href="#">26081</a> | <a href="#">26092</a> | <a href="#">26103</a> |
| Candidatus Carsonella 135557 - 167442nt              | (26027) | TGAAATATTATTTATAAATAATCTTGATATTTTAAAAGCAAAATTAACATAATTTAAATTTTTTAACTAAAAATTT   |                       |                       |                       |                       |                       |                       |                       |
| SARS-CoV-2 Reference Genome NC_045512.2              | (1)     | -----                                                                          |                       |                       |                       |                       |                       |                       |                       |
|                                                      | (1)     | -----                                                                          |                       |                       |                       |                       |                       |                       |                       |
| Section 340                                          |         |                                                                                |                       |                       |                       |                       |                       |                       |                       |
| Candidatus Carsonella ruddii strain BT chromosome... | (26104) | <a href="#">26104</a>                                                          | <a href="#">26114</a> | <a href="#">26125</a> | <a href="#">26136</a> | <a href="#">26147</a> | <a href="#">26158</a> | <a href="#">26169</a> | <a href="#">26180</a> |
| Candidatus Carsonella 135557 - 167442nt              | (26104) | GATTTTTTTTTTAATTTTAATATTTTAAAAGGAAAAAATAAAGTTTTGTTTTTAGGAATATTTGAAAAAAAATATCT  |                       |                       |                       |                       |                       |                       |                       |
| SARS-CoV-2 Reference Genome NC_045512.2              | (1)     | -----                                                                          |                       |                       |                       |                       |                       |                       |                       |
|                                                      | (1)     | -----                                                                          |                       |                       |                       |                       |                       |                       |                       |
| Section 341                                          |         |                                                                                |                       |                       |                       |                       |                       |                       |                       |
| Candidatus Carsonella ruddii strain BT chromosome... | (26181) | <a href="#">26181</a>                                                          | <a href="#">26191</a> | <a href="#">26202</a> | <a href="#">26213</a> | <a href="#">26224</a> | <a href="#">26235</a> | <a href="#">26246</a> | <a href="#">26257</a> |
| Candidatus Carsonella 135557 - 167442nt              | (26181) | GAAAATTTTTTTCACATCTAATTTATTGTTAATACTGTTATAAAACATTATAATAATTTATAAATAAAAAATTTTTTT |                       |                       |                       |                       |                       |                       |                       |
| SARS-CoV-2 Reference Genome NC_045512.2              | (1)     | -----                                                                          |                       |                       |                       |                       |                       |                       |                       |
|                                                      | (1)     | -----                                                                          |                       |                       |                       |                       |                       |                       |                       |
| Section 342                                          |         |                                                                                |                       |                       |                       |                       |                       |                       |                       |
| Candidatus Carsonella ruddii strain BT chromosome... | (26258) | <a href="#">26258</a>                                                          | <a href="#">26268</a> | <a href="#">26279</a> | <a href="#">26290</a> | <a href="#">26301</a> | <a href="#">26312</a> | <a href="#">26323</a> | <a href="#">26334</a> |
| Candidatus Carsonella 135557 - 167442nt              | (26258) | TTTTTAAAAAATATAAAAAACAATATTTTCTTATAATAAATTTTTTTAGTTTTTTATTAAATATATTTATTAA      |                       |                       |                       |                       |                       |                       |                       |
| SARS-CoV-2 Reference Genome NC_045512.2              | (1)     | -----                                                                          |                       |                       |                       |                       |                       |                       |                       |
|                                                      | (1)     | -----                                                                          |                       |                       |                       |                       |                       |                       |                       |

|                                                      |         |                                                                                |                       |                       |                       |                       |                       |                       |                       |
|------------------------------------------------------|---------|--------------------------------------------------------------------------------|-----------------------|-----------------------|-----------------------|-----------------------|-----------------------|-----------------------|-----------------------|
|                                                      |         |                                                                                |                       |                       |                       |                       |                       |                       | Section 343           |
| Candidatus Carsonella ruddii strain BT chromosome... | (26335) | <a href="#">26335</a>                                                          | <a href="#">26345</a> | <a href="#">26356</a> | <a href="#">26367</a> | <a href="#">26378</a> | <a href="#">26389</a> | <a href="#">26400</a> | <a href="#">26411</a> |
|                                                      | (26335) | GTAAAAATTTAAAAAATTTATTTTAAAAATATTTAAAAAATAAAAAATATTGTAATCAAATTTAAATTTAATTAAAT  |                       |                       |                       |                       |                       |                       |                       |
|                                                      | (1)     | -----                                                                          |                       |                       |                       |                       |                       |                       |                       |
|                                                      | (1)     | -----                                                                          |                       |                       |                       |                       |                       |                       |                       |
| Candidatus Carsonella 135557 - 167442nt              | (1)     |                                                                                |                       |                       |                       |                       |                       |                       |                       |
| SARS-CoV-2 Reference Genome NC_045512.2              | (1)     |                                                                                |                       |                       |                       |                       |                       |                       |                       |
|                                                      |         |                                                                                |                       |                       |                       |                       |                       |                       | Section 344           |
| Candidatus Carsonella ruddii strain BT chromosome... | (26412) | <a href="#">26412</a>                                                          | <a href="#">26422</a> | <a href="#">26433</a> | <a href="#">26444</a> | <a href="#">26455</a> | <a href="#">26466</a> | <a href="#">26477</a> | <a href="#">26488</a> |
|                                                      | (26412) | AATTTAAACATAAAAAATTTTATTGATTATTTTACTTTTTTAAAACAATTATATTTAAAAAAATTTTTTTTTTCA    |                       |                       |                       |                       |                       |                       |                       |
|                                                      | (1)     | -----                                                                          |                       |                       |                       |                       |                       |                       |                       |
|                                                      | (1)     | -----                                                                          |                       |                       |                       |                       |                       |                       |                       |
| Candidatus Carsonella 135557 - 167442nt              | (1)     |                                                                                |                       |                       |                       |                       |                       |                       |                       |
| SARS-CoV-2 Reference Genome NC_045512.2              | (1)     |                                                                                |                       |                       |                       |                       |                       |                       |                       |
|                                                      |         |                                                                                |                       |                       |                       |                       |                       |                       | Section 345           |
| Candidatus Carsonella ruddii strain BT chromosome... | (26489) | <a href="#">26489</a>                                                          | <a href="#">26499</a> | <a href="#">26510</a> | <a href="#">26521</a> | <a href="#">26532</a> | <a href="#">26543</a> | <a href="#">26554</a> | <a href="#">26565</a> |
|                                                      | (26489) | AAAAATTGATAAAATTAATACTACAGAAGCAGCAGTGGATAAACCGCCAGCTCCTAAAGATGTTAAACTGTTTT     |                       |                       |                       |                       |                       |                       |                       |
|                                                      | (1)     | -----                                                                          |                       |                       |                       |                       |                       |                       |                       |
|                                                      | (1)     | -----                                                                          |                       |                       |                       |                       |                       |                       |                       |
| Candidatus Carsonella 135557 - 167442nt              | (1)     |                                                                                |                       |                       |                       |                       |                       |                       |                       |
| SARS-CoV-2 Reference Genome NC_045512.2              | (1)     |                                                                                |                       |                       |                       |                       |                       |                       |                       |
|                                                      |         |                                                                                |                       |                       |                       |                       |                       |                       | Section 346           |
| Candidatus Carsonella ruddii strain BT chromosome... | (26566) | <a href="#">26566</a>                                                          | <a href="#">26576</a> | <a href="#">26587</a> | <a href="#">26598</a> | <a href="#">26609</a> | <a href="#">26620</a> | <a href="#">26631</a> | <a href="#">26642</a> |
|                                                      | (26566) | TTTAGAATTTTACAATTTAAATAATAGTATTTTAAAGAATTTTGTCTTTTATAAAAAATATATTTTTTGTAAAA     |                       |                       |                       |                       |                       |                       |                       |
|                                                      | (1)     | -----                                                                          |                       |                       |                       |                       |                       |                       |                       |
|                                                      | (1)     | -----                                                                          |                       |                       |                       |                       |                       |                       |                       |
| Candidatus Carsonella 135557 - 167442nt              | (1)     |                                                                                |                       |                       |                       |                       |                       |                       |                       |
| SARS-CoV-2 Reference Genome NC_045512.2              | (1)     |                                                                                |                       |                       |                       |                       |                       |                       |                       |
|                                                      |         |                                                                                |                       |                       |                       |                       |                       |                       | Section 347           |
| Candidatus Carsonella ruddii strain BT chromosome... | (26643) | <a href="#">26643</a>                                                          | <a href="#">26653</a> | <a href="#">26664</a> | <a href="#">26675</a> | <a href="#">26686</a> | <a href="#">26697</a> | <a href="#">26708</a> | <a href="#">26719</a> |
|                                                      | (26643) | ATAAAGATACATTTATAAATAAATAATTGTTTATATTTAAATAAAAAAGATAAAAAATTTTTTTTAAAAAATATTTTT |                       |                       |                       |                       |                       |                       |                       |
|                                                      | (1)     | -----                                                                          |                       |                       |                       |                       |                       |                       |                       |
|                                                      | (1)     | -----                                                                          |                       |                       |                       |                       |                       |                       |                       |
| Candidatus Carsonella 135557 - 167442nt              | (1)     |                                                                                |                       |                       |                       |                       |                       |                       |                       |
| SARS-CoV-2 Reference Genome NC_045512.2              | (1)     |                                                                                |                       |                       |                       |                       |                       |                       |                       |
|                                                      |         |                                                                                |                       |                       |                       |                       |                       |                       | Section 348           |
| Candidatus Carsonella ruddii strain BT chromosome... | (26720) | <a href="#">26720</a>                                                          | <a href="#">26730</a> | <a href="#">26741</a> | <a href="#">26752</a> | <a href="#">26763</a> | <a href="#">26774</a> | <a href="#">26785</a> | <a href="#">26796</a> |
|                                                      | (26720) | CTTATATAATTAGATAAATTAAAAATACTTTCTAAATAAAAAATATTACAACAAATGTAAAAATTTTTTATTTTAGA  |                       |                       |                       |                       |                       |                       |                       |
|                                                      | (1)     | -----                                                                          |                       |                       |                       |                       |                       |                       |                       |
|                                                      | (1)     | -----                                                                          |                       |                       |                       |                       |                       |                       |                       |
| Candidatus Carsonella 135557 - 167442nt              | (1)     |                                                                                |                       |                       |                       |                       |                       |                       |                       |
| SARS-CoV-2 Reference Genome NC_045512.2              | (1)     |                                                                                |                       |                       |                       |                       |                       |                       |                       |

|                                                      |         |                                                                                  |                       |                       |                       |                       |                       |                       |                       |
|------------------------------------------------------|---------|----------------------------------------------------------------------------------|-----------------------|-----------------------|-----------------------|-----------------------|-----------------------|-----------------------|-----------------------|
| Section 349                                          |         |                                                                                  |                       |                       |                       |                       |                       |                       |                       |
| Candidatus Carsonella ruddii strain BT chromosome... | (26797) | <a href="#">26797</a>                                                            | <a href="#">26807</a> | <a href="#">26818</a> | <a href="#">26829</a> | <a href="#">26840</a> | <a href="#">26851</a> | <a href="#">26862</a> | <a href="#">26873</a> |
| Candidatus Carsonella 135557 - 167442nt              | (26797) | AAGTAAAATTGAAAATTTAAATAAAGTATCAAACCCAAAAATATCTTTTTTCATAGTTTTTTTCTGATATACCTTTTT   |                       |                       |                       |                       |                       |                       |                       |
| SARS-CoV-2 Reference Genome NC_045512.2              | (1)     | -----                                                                            |                       |                       |                       |                       |                       |                       |                       |
|                                                      | (1)     | -----                                                                            |                       |                       |                       |                       |                       |                       |                       |
| Section 350                                          |         |                                                                                  |                       |                       |                       |                       |                       |                       |                       |
| Candidatus Carsonella ruddii strain BT chromosome... | (26874) | <a href="#">26874</a>                                                            | <a href="#">26884</a> | <a href="#">26895</a> | <a href="#">26906</a> | <a href="#">26917</a> | <a href="#">26928</a> | <a href="#">26939</a> | <a href="#">26950</a> |
| Candidatus Carsonella 135557 - 167442nt              | (26874) | TTATTGATATTTTTATTAATTTTAAAAAAGACATTTTTTCAATATTTGTTAAAAATATAAATTACAAGTACCATTAAAA  |                       |                       |                       |                       |                       |                       |                       |
| SARS-CoV-2 Reference Genome NC_045512.2              | (1)     | -----                                                                            |                       |                       |                       |                       |                       |                       |                       |
|                                                      | (1)     | -----                                                                            |                       |                       |                       |                       |                       |                       |                       |
| Section 351                                          |         |                                                                                  |                       |                       |                       |                       |                       |                       |                       |
| Candidatus Carsonella ruddii strain BT chromosome... | (26951) | <a href="#">26951</a>                                                            | <a href="#">26961</a> | <a href="#">26972</a> | <a href="#">26983</a> | <a href="#">26994</a> | <a href="#">27005</a> | <a href="#">27016</a> | <a href="#">27027</a> |
| Candidatus Carsonella 135557 - 167442nt              | (26951) | ATACCAAAAAAATAATTAATATTTTTCTTTTGAATAAAATTTATCTAATAAATTTATTATTGGTAAAGAACCACAAAC   |                       |                       |                       |                       |                       |                       |                       |
| SARS-CoV-2 Reference Genome NC_045512.2              | (1)     | -----                                                                            |                       |                       |                       |                       |                       |                       |                       |
|                                                      | (1)     | -----                                                                            |                       |                       |                       |                       |                       |                       |                       |
| Section 352                                          |         |                                                                                  |                       |                       |                       |                       |                       |                       |                       |
| Candidatus Carsonella ruddii strain BT chromosome... | (27028) | <a href="#">27028</a>                                                            | <a href="#">27038</a> | <a href="#">27049</a> | <a href="#">27060</a> | <a href="#">27071</a> | <a href="#">27082</a> | <a href="#">27093</a> | <a href="#">27104</a> |
| Candidatus Carsonella 135557 - 167442nt              | (27028) | AGATGCTTCATAATAAATTTTTTTTATTGTTTATTTTAAACAAATAATTTATAAAAAATAAATATTTAGAAATTAAAT   |                       |                       |                       |                       |                       |                       |                       |
| SARS-CoV-2 Reference Genome NC_045512.2              | (1)     | -----                                                                            |                       |                       |                       |                       |                       |                       |                       |
|                                                      | (1)     | -----                                                                            |                       |                       |                       |                       |                       |                       |                       |
| Section 353                                          |         |                                                                                  |                       |                       |                       |                       |                       |                       |                       |
| Candidatus Carsonella ruddii strain BT chromosome... | (27105) | <a href="#">27105</a>                                                            | <a href="#">27115</a> | <a href="#">27126</a> | <a href="#">27137</a> | <a href="#">27148</a> | <a href="#">27159</a> | <a href="#">27170</a> | <a href="#">27181</a> |
| Candidatus Carsonella 135557 - 167442nt              | (27105) | CTTTATTTGCGAGAAATATAATTATTTTTTTTTTTTTTAAACAATTTAATATTATTTCTATAACTACATGTATATTACCT |                       |                       |                       |                       |                       |                       |                       |
| SARS-CoV-2 Reference Genome NC_045512.2              | (1)     | -----                                                                            |                       |                       |                       |                       |                       |                       |                       |
|                                                      | (1)     | -----                                                                            |                       |                       |                       |                       |                       |                       |                       |
| Section 354                                          |         |                                                                                  |                       |                       |                       |                       |                       |                       |                       |
| Candidatus Carsonella ruddii strain BT chromosome... | (27182) | <a href="#">27182</a>                                                            | <a href="#">27192</a> | <a href="#">27203</a> | <a href="#">27214</a> | <a href="#">27225</a> | <a href="#">27236</a> | <a href="#">27247</a> | <a href="#">27258</a> |
| Candidatus Carsonella 135557 - 167442nt              | (27182) | ATTAATTCCTATAAATAAATTTTTATTTTTTAAATAATTTTCATATTTATTTTATTAAATTTATTTAAGCAATTAAA    |                       |                       |                       |                       |                       |                       |                       |
| SARS-CoV-2 Reference Genome NC_045512.2              | (1)     | -----                                                                            |                       |                       |                       |                       |                       |                       |                       |
|                                                      | (1)     | -----                                                                            |                       |                       |                       |                       |                       |                       |                       |

|                                                      |         |                                                                                  |                       |                       |                       |                       |                       |                       |                       |
|------------------------------------------------------|---------|----------------------------------------------------------------------------------|-----------------------|-----------------------|-----------------------|-----------------------|-----------------------|-----------------------|-----------------------|
| Section 355                                          |         |                                                                                  |                       |                       |                       |                       |                       |                       |                       |
| Candidatus Carsonella ruddii strain BT chromosome... | (27259) | <a href="#">27259</a>                                                            | <a href="#">27269</a> | <a href="#">27280</a> | <a href="#">27291</a> | <a href="#">27302</a> | <a href="#">27313</a> | <a href="#">27324</a> | <a href="#">27335</a> |
| Candidatus Carsonella 135557 - 167442nt              | (27259) | TCTATTATTTTTTGAAAAAGTTAAAATTTTATTTTTTTTTATTTAATATATTAAAAACATTATTTCTACATTTTCCTA   |                       |                       |                       |                       |                       |                       |                       |
| SARS-CoV-2 Reference Genome NC_045512.2              | (1)     | -----                                                                            |                       |                       |                       |                       |                       |                       |                       |
|                                                      | (1)     | -----                                                                            |                       |                       |                       |                       |                       |                       |                       |
| Section 356                                          |         |                                                                                  |                       |                       |                       |                       |                       |                       |                       |
| Candidatus Carsonella ruddii strain BT chromosome... | (27336) | <a href="#">27336</a>                                                            | <a href="#">27346</a> | <a href="#">27357</a> | <a href="#">27368</a> | <a href="#">27379</a> | <a href="#">27390</a> | <a href="#">27401</a> | <a href="#">27412</a> |
| Candidatus Carsonella 135557 - 167442nt              | (27336) | AACCAAAAATTGAAAAATCCATAATTAAATATTTTTTAATGAAATTAAATTTGGATTTTTTAATAAAAAAAATTTTAT   |                       |                       |                       |                       |                       |                       |                       |
| SARS-CoV-2 Reference Genome NC_045512.2              | (1)     | -----                                                                            |                       |                       |                       |                       |                       |                       |                       |
|                                                      | (1)     | -----                                                                            |                       |                       |                       |                       |                       |                       |                       |
| Section 357                                          |         |                                                                                  |                       |                       |                       |                       |                       |                       |                       |
| Candidatus Carsonella ruddii strain BT chromosome... | (27413) | <a href="#">27413</a>                                                            | <a href="#">27423</a> | <a href="#">27434</a> | <a href="#">27445</a> | <a href="#">27456</a> | <a href="#">27467</a> | <a href="#">27478</a> | <a href="#">27489</a> |
| Candidatus Carsonella 135557 - 167442nt              | (27413) | TTAATTTTATTCCTTGTATTTTTTTTTCTACATTAAAAGTAAATTTTTTAATTTTAATAATTTTACCAAAAAAATA     |                       |                       |                       |                       |                       |                       |                       |
| SARS-CoV-2 Reference Genome NC_045512.2              | (1)     | -----                                                                            |                       |                       |                       |                       |                       |                       |                       |
|                                                      | (1)     | -----                                                                            |                       |                       |                       |                       |                       |                       |                       |
| Section 358                                          |         |                                                                                  |                       |                       |                       |                       |                       |                       |                       |
| Candidatus Carsonella ruddii strain BT chromosome... | (27490) | <a href="#">27490</a>                                                            | <a href="#">27500</a> | <a href="#">27511</a> | <a href="#">27522</a> | <a href="#">27533</a> | <a href="#">27544</a> | <a href="#">27555</a> | <a href="#">27566</a> |
| Candidatus Carsonella 135557 - 167442nt              | (27490) | GAAATTTTATTATTAACTAAATAAGAAACTGTAATATTATTATTTTTTTTTTAAAAAATTTTCATATATTGAAAAATTTT |                       |                       |                       |                       |                       |                       |                       |
| SARS-CoV-2 Reference Genome NC_045512.2              | (1)     | -----                                                                            |                       |                       |                       |                       |                       |                       |                       |
|                                                      | (1)     | -----                                                                            |                       |                       |                       |                       |                       |                       |                       |
| Section 359                                          |         |                                                                                  |                       |                       |                       |                       |                       |                       |                       |
| Candidatus Carsonella ruddii strain BT chromosome... | (27567) | <a href="#">27567</a>                                                            | <a href="#">27577</a> | <a href="#">27588</a> | <a href="#">27599</a> | <a href="#">27610</a> | <a href="#">27621</a> | <a href="#">27632</a> | <a href="#">27643</a> |
| Candidatus Carsonella 135557 - 167442nt              | (27567) | TTTTTAAAAGTGGAATCTAATTATTATTTTTTTTTTTAAAAACAATATAATTATTAGGAATAAAATATTTAAATTTG    |                       |                       |                       |                       |                       |                       |                       |
| SARS-CoV-2 Reference Genome NC_045512.2              | (1)     | -----                                                                            |                       |                       |                       |                       |                       |                       |                       |
|                                                      | (1)     | -----                                                                            |                       |                       |                       |                       |                       |                       |                       |
| Section 360                                          |         |                                                                                  |                       |                       |                       |                       |                       |                       |                       |
| Candidatus Carsonella ruddii strain BT chromosome... | (27644) | <a href="#">27644</a>                                                            | <a href="#">27654</a> | <a href="#">27665</a> | <a href="#">27676</a> | <a href="#">27687</a> | <a href="#">27698</a> | <a href="#">27709</a> | <a href="#">27720</a> |
| Candidatus Carsonella 135557 - 167442nt              | (27644) | AAATTAATTATTAAAAACATTTCTTTGTGTTAAAAATTTTAAATATAAAATATTTTTTTATTAAATAACAATTTGT     |                       |                       |                       |                       |                       |                       |                       |
| SARS-CoV-2 Reference Genome NC_045512.2              | (1)     | -----                                                                            |                       |                       |                       |                       |                       |                       |                       |
|                                                      | (1)     | -----                                                                            |                       |                       |                       |                       |                       |                       |                       |

|                                                      |         |                                                                                 |                       |                       |                       |                       |                       |                       |                       |
|------------------------------------------------------|---------|---------------------------------------------------------------------------------|-----------------------|-----------------------|-----------------------|-----------------------|-----------------------|-----------------------|-----------------------|
| Section 361                                          |         |                                                                                 |                       |                       |                       |                       |                       |                       |                       |
| Candidatus Carsonella ruddii strain BT chromosome... | (27721) | <a href="#">27721</a>                                                           | <a href="#">27731</a> | <a href="#">27742</a> | <a href="#">27753</a> | <a href="#">27764</a> | <a href="#">27775</a> | <a href="#">27786</a> | <a href="#">27797</a> |
| Candidatus Carsonella 135557 - 167442nt              | (27721) | TATTAGTTTCATATTTTTTAAAATTTCAAATAATCTTTTACTTAATTTAGCTCCTTTTTTTAATATAAAAAAATAACAA |                       |                       |                       |                       |                       |                       |                       |
| SARS-CoV-2 Reference Genome NC_045512.2              | (1)     | -----                                                                           |                       |                       |                       |                       |                       |                       |                       |
|                                                      | (1)     | -----                                                                           |                       |                       |                       |                       |                       |                       |                       |
| Section 362                                          |         |                                                                                 |                       |                       |                       |                       |                       |                       |                       |
| Candidatus Carsonella ruddii strain BT chromosome... | (27798) | <a href="#">27798</a>                                                           | <a href="#">27808</a> | <a href="#">27819</a> | <a href="#">27830</a> | <a href="#">27841</a> | <a href="#">27852</a> | <a href="#">27863</a> | <a href="#">27874</a> |
| Candidatus Carsonella 135557 - 167442nt              | (27798) | ATTATAATTAACAAAAAACTTTTTCCATTATTTATATTAGAATTAAAAAAACCAATTCTTTTAATAATTTTTTCCAA   |                       |                       |                       |                       |                       |                       |                       |
| SARS-CoV-2 Reference Genome NC_045512.2              | (1)     | -----                                                                           |                       |                       |                       |                       |                       |                       |                       |
|                                                      | (1)     | -----                                                                           |                       |                       |                       |                       |                       |                       |                       |
| Section 363                                          |         |                                                                                 |                       |                       |                       |                       |                       |                       |                       |
| Candidatus Carsonella ruddii strain BT chromosome... | (27875) | <a href="#">27875</a>                                                           | <a href="#">27885</a> | <a href="#">27896</a> | <a href="#">27907</a> | <a href="#">27918</a> | <a href="#">27929</a> | <a href="#">27940</a> | <a href="#">27951</a> |
| Candidatus Carsonella 135557 - 167442nt              | (27875) | AAACAGAATTTTTTCTATAAATAACATTAATATAAAACAAATTTTCTAAGTTATTTTTTTTTTGCAATCTGACAACA   |                       |                       |                       |                       |                       |                       |                       |
| SARS-CoV-2 Reference Genome NC_045512.2              | (1)     | -----                                                                           |                       |                       |                       |                       |                       |                       |                       |
|                                                      | (1)     | -----                                                                           |                       |                       |                       |                       |                       |                       |                       |
| Section 364                                          |         |                                                                                 |                       |                       |                       |                       |                       |                       |                       |
| Candidatus Carsonella ruddii strain BT chromosome... | (27952) | <a href="#">27952</a>                                                           | <a href="#">27962</a> | <a href="#">27973</a> | <a href="#">27984</a> | <a href="#">27995</a> | <a href="#">28006</a> | <a href="#">28017</a> | <a href="#">28028</a> |
| Candidatus Carsonella 135557 - 167442nt              | (27952) | ATCATTTTAAAATACATTTAAAAAATAATTTTCAACATAATCTTAATGTTTGCGGGGTAGAGCAGTTGGTAGCT      |                       |                       |                       |                       |                       |                       |                       |
| SARS-CoV-2 Reference Genome NC_045512.2              | (1)     | -----                                                                           |                       |                       |                       |                       |                       |                       |                       |
|                                                      | (1)     | -----                                                                           |                       |                       |                       |                       |                       |                       |                       |
| Section 365                                          |         |                                                                                 |                       |                       |                       |                       |                       |                       |                       |
| Candidatus Carsonella ruddii strain BT chromosome... | (28029) | <a href="#">28029</a>                                                           | <a href="#">28039</a> | <a href="#">28050</a> | <a href="#">28061</a> | <a href="#">28072</a> | <a href="#">28083</a> | <a href="#">28094</a> | <a href="#">28105</a> |
| Candidatus Carsonella 135557 - 167442nt              | (28029) | CGTCGGGCTCATAATCCGAAGGACGTTGGTTCAAATCCAATCCCCGCAATTTTAAATTAATTAATTATTTTTTTATG   |                       |                       |                       |                       |                       |                       |                       |
| SARS-CoV-2 Reference Genome NC_045512.2              | (1)     | -----                                                                           |                       |                       |                       |                       |                       |                       |                       |
|                                                      | (1)     | -----                                                                           |                       |                       |                       |                       |                       |                       |                       |
| Section 366                                          |         |                                                                                 |                       |                       |                       |                       |                       |                       |                       |
| Candidatus Carsonella ruddii strain BT chromosome... | (28106) | <a href="#">28106</a>                                                           | <a href="#">28116</a> | <a href="#">28127</a> | <a href="#">28138</a> | <a href="#">28149</a> | <a href="#">28160</a> | <a href="#">28171</a> | <a href="#">28182</a> |
| Candidatus Carsonella 135557 - 167442nt              | (28106) | TTTCCAATTAAACATTTTTCTTATATTATCTCCAACATTTTCTATTAAATGATTTTTATAATAATCTCTAAATAAAT   |                       |                       |                       |                       |                       |                       |                       |
| SARS-CoV-2 Reference Genome NC_045512.2              | (1)     | -----                                                                           |                       |                       |                       |                       |                       |                       |                       |
|                                                      | (1)     | -----                                                                           |                       |                       |                       |                       |                       |                       |                       |

|                                                      |         |                                                                                 |                       |                       |                       |                       |                       |                       |                       |
|------------------------------------------------------|---------|---------------------------------------------------------------------------------|-----------------------|-----------------------|-----------------------|-----------------------|-----------------------|-----------------------|-----------------------|
| Section 367                                          |         |                                                                                 |                       |                       |                       |                       |                       |                       |                       |
| Candidatus Carsonella ruddii strain BT chromosome... | (28183) | <a href="#">28183</a>                                                           | <a href="#">28193</a> | <a href="#">28204</a> | <a href="#">28215</a> | <a href="#">28226</a> | <a href="#">28237</a> | <a href="#">28248</a> | <a href="#">28259</a> |
| Candidatus Carsonella 135557 - 167442nt              | (28183) | TTAATTTAATAAAATTTGATTTTTTATCAAGAATAAAATTTT TAGAAAAATTACCATTTTGAATATTTTTTAAATATT |                       |                       |                       |                       |                       |                       |                       |
| SARS-CoV-2 Reference Genome NC_045512.2              | (1)     | -----                                                                           |                       |                       |                       |                       |                       |                       |                       |
|                                                      | (1)     | -----                                                                           |                       |                       |                       |                       |                       |                       |                       |
| Section 368                                          |         |                                                                                 |                       |                       |                       |                       |                       |                       |                       |
| Candidatus Carsonella ruddii strain BT chromosome... | (28260) | <a href="#">28260</a>                                                           | <a href="#">28270</a> | <a href="#">28281</a> | <a href="#">28292</a> | <a href="#">28303</a> | <a href="#">28314</a> | <a href="#">28325</a> | <a href="#">28336</a> |
| Candidatus Carsonella 135557 - 167442nt              | (28260) | TTTTTCATTTTTTTTTTTTAAATATTATAATAATATTCGTTTCATAACATAATAATCACCATATTCTGCAGTATTAGA  |                       |                       |                       |                       |                       |                       |                       |
| SARS-CoV-2 Reference Genome NC_045512.2              | (1)     | -----                                                                           |                       |                       |                       |                       |                       |                       |                       |
|                                                      | (1)     | -----                                                                           |                       |                       |                       |                       |                       |                       |                       |
| Section 369                                          |         |                                                                                 |                       |                       |                       |                       |                       |                       |                       |
| Candidatus Carsonella ruddii strain BT chromosome... | (28337) | <a href="#">28337</a>                                                           | <a href="#">28347</a> | <a href="#">28358</a> | <a href="#">28369</a> | <a href="#">28380</a> | <a href="#">28391</a> | <a href="#">28402</a> | <a href="#">28413</a> |
| Candidatus Carsonella 135557 - 167442nt              | (28337) | TATTGAATATCTCATATTTTTAATACCTCCTTCATATATTAAATCAACAATTAATTTCAATTCATGTAAACATTCAA   |                       |                       |                       |                       |                       |                       |                       |
| SARS-CoV-2 Reference Genome NC_045512.2              | (1)     | -----                                                                           |                       |                       |                       |                       |                       |                       |                       |
|                                                      | (1)     | -----                                                                           |                       |                       |                       |                       |                       |                       |                       |
| Section 370                                          |         |                                                                                 |                       |                       |                       |                       |                       |                       |                       |
| Candidatus Carsonella ruddii strain BT chromosome... | (28414) | <a href="#">28414</a>                                                           | <a href="#">28424</a> | <a href="#">28435</a> | <a href="#">28446</a> | <a href="#">28457</a> | <a href="#">28468</a> | <a href="#">28479</a> | <a href="#">28490</a> |
| Candidatus Carsonella 135557 - 167442nt              | (28414) | AATATGAAAGATCTGGTGAATATCCAGCTTCTACTAAAGTTTCAAATCCACAAATTATAAGAGAACTTACACCTCCA   |                       |                       |                       |                       |                       |                       |                       |
| SARS-CoV-2 Reference Genome NC_045512.2              | (1)     | -----                                                                           |                       |                       |                       |                       |                       |                       |                       |
|                                                      | (1)     | -----                                                                           |                       |                       |                       |                       |                       |                       |                       |
| Section 371                                          |         |                                                                                 |                       |                       |                       |                       |                       |                       |                       |
| Candidatus Carsonella ruddii strain BT chromosome... | (28491) | <a href="#">28491</a>                                                           | <a href="#">28501</a> | <a href="#">28512</a> | <a href="#">28523</a> | <a href="#">28534</a> | <a href="#">28545</a> | <a href="#">28556</a> | <a href="#">28567</a> |
| Candidatus Carsonella 135557 - 167442nt              | (28491) | CATAAACTGATTGTTCTCCAAATAAATCAGTTTCAGTTTCTTCTTTAAACTTGTTAGAAATTATTCCAACCTACC     |                       |                       |                       |                       |                       |                       |                       |
| SARS-CoV-2 Reference Genome NC_045512.2              | (1)     | -----                                                                           |                       |                       |                       |                       |                       |                       |                       |
|                                                      | (1)     | -----                                                                           |                       |                       |                       |                       |                       |                       |                       |
| Section 372                                          |         |                                                                                 |                       |                       |                       |                       |                       |                       |                       |
| Candidatus Carsonella ruddii strain BT chromosome... | (28568) | <a href="#">28568</a>                                                           | <a href="#">28578</a> | <a href="#">28589</a> | <a href="#">28600</a> | <a href="#">28611</a> | <a href="#">28622</a> | <a href="#">28633</a> | <a href="#">28644</a> |
| Candidatus Carsonella 135557 - 167442nt              | (28568) | ACTACCTATACACATTGAATAAGATAATGCAATATTTAATGATTCTTTATTATAATCTTGATAAATAGCTATTAAAG   |                       |                       |                       |                       |                       |                       |                       |
| SARS-CoV-2 Reference Genome NC_045512.2              | (1)     | -----                                                                           |                       |                       |                       |                       |                       |                       |                       |
|                                                      | (1)     | -----                                                                           |                       |                       |                       |                       |                       |                       |                       |

|                                                      |         |                                                                                |                       |                       |                       |                       |                       |                       |                       |
|------------------------------------------------------|---------|--------------------------------------------------------------------------------|-----------------------|-----------------------|-----------------------|-----------------------|-----------------------|-----------------------|-----------------------|
| Section 373                                          |         |                                                                                |                       |                       |                       |                       |                       |                       |                       |
| Candidatus Carsonella ruddii strain BT chromosome... | (28645) | <a href="#">28645</a>                                                          | <a href="#">28655</a> | <a href="#">28666</a> | <a href="#">28677</a> | <a href="#">28688</a> | <a href="#">28699</a> | <a href="#">28710</a> | <a href="#">28721</a> |
| Candidatus Carsonella 135557 - 167442nt              | (28645) | AAGGAACTCCACTTCCTTCACAAAATGTTGATCTTACTGTATGACCAGGAGCTTTAGGAGCAACTAAAATAATATTT  |                       |                       |                       |                       |                       |                       |                       |
| SARS-CoV-2 Reference Genome NC_045512.2              | (1)     | -----                                                                          |                       |                       |                       |                       |                       |                       |                       |
|                                                      | (1)     | -----                                                                          |                       |                       |                       |                       |                       |                       |                       |
| Section 374                                          |         |                                                                                |                       |                       |                       |                       |                       |                       |                       |
| Candidatus Carsonella ruddii strain BT chromosome... | (28722) | <a href="#">28722</a>                                                          | <a href="#">28732</a> | <a href="#">28743</a> | <a href="#">28754</a> | <a href="#">28765</a> | <a href="#">28776</a> | <a href="#">28787</a> | <a href="#">28798</a> |
| Candidatus Carsonella 135557 - 167442nt              | (28722) | AAATTATTTTTTTGGAATTATTTGTTTATAATGTATATTAAACCATGGGAAAAAATTAACGTTGTTCCCTCTTTAAT  |                       |                       |                       |                       |                       |                       |                       |
| SARS-CoV-2 Reference Genome NC_045512.2              | (1)     | -----                                                                          |                       |                       |                       |                       |                       |                       |                       |
|                                                      | (1)     | -----                                                                          |                       |                       |                       |                       |                       |                       |                       |
| Section 375                                          |         |                                                                                |                       |                       |                       |                       |                       |                       |                       |
| Candidatus Carsonella ruddii strain BT chromosome... | (28799) | <a href="#">28799</a>                                                          | <a href="#">28809</a> | <a href="#">28820</a> | <a href="#">28831</a> | <a href="#">28842</a> | <a href="#">28853</a> | <a href="#">28864</a> | <a href="#">28875</a> |
| Candidatus Carsonella 135557 - 167442nt              | (28799) | ATTTTTTCTATATAATCATAATATAAATCTCTTTGATCTTCATCAGGAATTAAAATAACTAATATATCAGATTTTA   |                       |                       |                       |                       |                       |                       |                       |
| SARS-CoV-2 Reference Genome NC_045512.2              | (1)     | -----                                                                          |                       |                       |                       |                       |                       |                       |                       |
|                                                      | (1)     | -----                                                                          |                       |                       |                       |                       |                       |                       |                       |
| Section 376                                          |         |                                                                                |                       |                       |                       |                       |                       |                       |                       |
| Candidatus Carsonella ruddii strain BT chromosome... | (28876) | <a href="#">28876</a>                                                          | <a href="#">28886</a> | <a href="#">28897</a> | <a href="#">28908</a> | <a href="#">28919</a> | <a href="#">28930</a> | <a href="#">28941</a> | <a href="#">28952</a> |
| Candidatus Carsonella 135557 - 167442nt              | (28876) | ATAAAGCTTCCTTAATATCAATTACTTTAAAACCGTCTTTTTTTGCTTTTTCTATTTTTTTAGAAATTATTTTTTAAA |                       |                       |                       |                       |                       |                       |                       |
| SARS-CoV-2 Reference Genome NC_045512.2              | (1)     | -----                                                                          |                       |                       |                       |                       |                       |                       |                       |
|                                                      | (1)     | -----                                                                          |                       |                       |                       |                       |                       |                       |                       |
| Section 377                                          |         |                                                                                |                       |                       |                       |                       |                       |                       |                       |
| Candidatus Carsonella ruddii strain BT chromosome... | (28953) | <a href="#">28953</a>                                                          | <a href="#">28963</a> | <a href="#">28974</a> | <a href="#">28985</a> | <a href="#">28996</a> | <a href="#">29007</a> | <a href="#">29018</a> | <a href="#">29029</a> |
| Candidatus Carsonella 135557 - 167442nt              | (28953) | CAAACATATGTTTCAATACCTGAATCTTTTAAATTTTGAGCTTGTGCATGACCTTGAGAACCATATCCTATTACTGT  |                       |                       |                       |                       |                       |                       |                       |
| SARS-CoV-2 Reference Genome NC_045512.2              | (1)     | -----                                                                          |                       |                       |                       |                       |                       |                       |                       |
|                                                      | (1)     | -----                                                                          |                       |                       |                       |                       |                       |                       |                       |
| Section 378                                          |         |                                                                                |                       |                       |                       |                       |                       |                       |                       |
| Candidatus Carsonella ruddii strain BT chromosome... | (29030) | <a href="#">29030</a>                                                          | <a href="#">29040</a> | <a href="#">29051</a> | <a href="#">29062</a> | <a href="#">29073</a> | <a href="#">29084</a> | <a href="#">29095</a> | <a href="#">29106</a> |
| Candidatus Carsonella 135557 - 167442nt              | (29030) | TATAATTTTATTTTTTAATAATAATTTATTACAATCTTTTTCGTAAACATAATTTTTATAATATATTTTTTATAATA  |                       |                       |                       |                       |                       |                       |                       |
| SARS-CoV-2 Reference Genome NC_045512.2              | (1)     | -----                                                                          |                       |                       |                       |                       |                       |                       |                       |
|                                                      | (1)     | -----                                                                          |                       |                       |                       |                       |                       |                       |                       |

## SARS-CoV-2 &amp; Bakterien.apr

|                                                      |         |                                                                                |                       |                       |                       |                       |                       |                       |                       |
|------------------------------------------------------|---------|--------------------------------------------------------------------------------|-----------------------|-----------------------|-----------------------|-----------------------|-----------------------|-----------------------|-----------------------|
| Section 379                                          |         |                                                                                |                       |                       |                       |                       |                       |                       |                       |
| Candidatus Carsonella ruddii strain BT chromosome... | (29107) | <a href="#">29107</a>                                                          | <a href="#">29117</a> | <a href="#">29128</a> | <a href="#">29139</a> | <a href="#">29150</a> | <a href="#">29161</a> | <a href="#">29172</a> | <a href="#">29183</a> |
| Candidatus Carsonella 135557 - 167442nt              | (29107) | GAGAAAATTATTCAATATACTAAAAACATAATTTATTTTTTTTGAATTAAAAAATAAATAATTTTTTAAAAAAT     |                       |                       |                       |                       |                       |                       |                       |
| SARS-CoV-2 Reference Genome NC_045512.2              | (1)     | -----                                                                          |                       |                       |                       |                       |                       |                       |                       |
|                                                      | (1)     | -----                                                                          |                       |                       |                       |                       |                       |                       |                       |
| Section 380                                          |         |                                                                                |                       |                       |                       |                       |                       |                       |                       |
| Candidatus Carsonella ruddii strain BT chromosome... | (29184) | <a href="#">29184</a>                                                          | <a href="#">29194</a> | <a href="#">29205</a> | <a href="#">29216</a> | <a href="#">29227</a> | <a href="#">29238</a> | <a href="#">29249</a> | <a href="#">29260</a> |
| Candidatus Carsonella 135557 - 167442nt              | (29184) | TTACAAACATAAAATTTTATAAAATTTAATTTTAAATTTTATTAAAAATATTATTATAAATAATAATTTTAAATATTT |                       |                       |                       |                       |                       |                       |                       |
| SARS-CoV-2 Reference Genome NC_045512.2              | (1)     | -----                                                                          |                       |                       |                       |                       |                       |                       |                       |
|                                                      | (1)     | -----                                                                          |                       |                       |                       |                       |                       |                       |                       |
| Section 381                                          |         |                                                                                |                       |                       |                       |                       |                       |                       |                       |
| Candidatus Carsonella ruddii strain BT chromosome... | (29261) | <a href="#">29261</a>                                                          | <a href="#">29271</a> | <a href="#">29282</a> | <a href="#">29293</a> | <a href="#">29304</a> | <a href="#">29315</a> | <a href="#">29326</a> | <a href="#">29337</a> |
| Candidatus Carsonella 135557 - 167442nt              | (29261) | TTAACAAAATAAATTTTATTTATATTTAAACATTTTGATAAAGATTTTAAAAATTGATTAATTTTAAATATGAATC   |                       |                       |                       |                       |                       |                       |                       |
| SARS-CoV-2 Reference Genome NC_045512.2              | (1)     | -----                                                                          |                       |                       |                       |                       |                       |                       |                       |
|                                                      | (1)     | -----                                                                          |                       |                       |                       |                       |                       |                       |                       |
| Section 382                                          |         |                                                                                |                       |                       |                       |                       |                       |                       |                       |
| Candidatus Carsonella ruddii strain BT chromosome... | (29338) | <a href="#">29338</a>                                                          | <a href="#">29348</a> | <a href="#">29359</a> | <a href="#">29370</a> | <a href="#">29381</a> | <a href="#">29392</a> | <a href="#">29403</a> | <a href="#">29414</a> |
| Candidatus Carsonella 135557 - 167442nt              | (29338) | ATTAATAAAAAATAATTTTAAATGATTTTAAATATTGCTTTTAAATTTTAAATAATTCTATTTTAAATTAATTTGAG  |                       |                       |                       |                       |                       |                       |                       |
| SARS-CoV-2 Reference Genome NC_045512.2              | (1)     | -----                                                                          |                       |                       |                       |                       |                       |                       |                       |
|                                                      | (1)     | -----                                                                          |                       |                       |                       |                       |                       |                       |                       |
| Section 383                                          |         |                                                                                |                       |                       |                       |                       |                       |                       |                       |
| Candidatus Carsonella ruddii strain BT chromosome... | (29415) | <a href="#">29415</a>                                                          | <a href="#">29425</a> | <a href="#">29436</a> | <a href="#">29447</a> | <a href="#">29458</a> | <a href="#">29469</a> | <a href="#">29480</a> | <a href="#">29491</a> |
| Candidatus Carsonella 135557 - 167442nt              | (29415) | TAAAAAATTATAAAATTTACTAACACAATTAATTTTATTATGAATTAAAAAATAAATTTTTTTTCATATTTTTT     |                       |                       |                       |                       |                       |                       |                       |
| SARS-CoV-2 Reference Genome NC_045512.2              | (1)     | -----                                                                          |                       |                       |                       |                       |                       |                       |                       |
|                                                      | (1)     | -----                                                                          |                       |                       |                       |                       |                       |                       |                       |
| Section 384                                          |         |                                                                                |                       |                       |                       |                       |                       |                       |                       |
| Candidatus Carsonella ruddii strain BT chromosome... | (29492) | <a href="#">29492</a>                                                          | <a href="#">29502</a> | <a href="#">29513</a> | <a href="#">29524</a> | <a href="#">29535</a> | <a href="#">29546</a> | <a href="#">29557</a> | <a href="#">29568</a> |
| Candidatus Carsonella 135557 - 167442nt              | (29492) | TATTGAAAAAAGTAATTAATTCACACATAGATTGATTATAAATTTGTATAGGAAATACATTTTCTTTATGATTAA    |                       |                       |                       |                       |                       |                       |                       |
| SARS-CoV-2 Reference Genome NC_045512.2              | (1)     | -----                                                                          |                       |                       |                       |                       |                       |                       |                       |
|                                                      | (1)     | -----                                                                          |                       |                       |                       |                       |                       |                       |                       |



## SARS-CoV-2 &amp; Bakterien.apr

|                                                      |         |                                                                                 |       |       |       |       |       |       |       |
|------------------------------------------------------|---------|---------------------------------------------------------------------------------|-------|-------|-------|-------|-------|-------|-------|
| Section 385                                          |         |                                                                                 |       |       |       |       |       |       |       |
| Candidatus Carsonella ruddii strain BT chromosome... | (29569) | 29569                                                                           | 29579 | 29590 | 29601 | 29612 | 29623 | 29634 | 29645 |
| Candidatus Carsonella 135557 - 167442nt              | (29569) | TATAAATATTTATAAAACAAAATATATCTACAAATATTAAATTTATAAAAAAAAAAATAAAATTTTTTAATATTATAA  |       |       |       |       |       |       |       |
| SARS-CoV-2 Reference Genome NC_045512.2              | (1)     | -----                                                                           |       |       |       |       |       |       |       |
|                                                      | (1)     | -----                                                                           |       |       |       |       |       |       |       |
| Section 386                                          |         |                                                                                 |       |       |       |       |       |       |       |
| Candidatus Carsonella ruddii strain BT chromosome... | (29646) | 29646                                                                           | 29656 | 29667 | 29678 | 29689 | 29700 | 29711 | 29722 |
| Candidatus Carsonella 135557 - 167442nt              | (29646) | AAATTAAAAGAATATAAATTATAAGAATTAATTAATTTTTTAAAATTTGGAAGAGAATAAATATATGAATGTGAAAA   |       |       |       |       |       |       |       |
| SARS-CoV-2 Reference Genome NC_045512.2              | (1)     | -----                                                                           |       |       |       |       |       |       |       |
|                                                      | (1)     | -----                                                                           |       |       |       |       |       |       |       |
| Section 387                                          |         |                                                                                 |       |       |       |       |       |       |       |
| Candidatus Carsonella ruddii strain BT chromosome... | (29723) | 29723                                                                           | 29733 | 29744 | 29755 | 29766 | 29777 | 29788 | 29799 |
| Candidatus Carsonella 135557 - 167442nt              | (29723) | TCTATTATTATAGTTTAAATTCCTTGCCATTGTTTAACCATACCTAAACTTTGATTATTTAAATTAACGATAATAATGT |       |       |       |       |       |       |       |
| SARS-CoV-2 Reference Genome NC_045512.2              | (1)     | -----                                                                           |       |       |       |       |       |       |       |
|                                                      | (1)     | -----                                                                           |       |       |       |       |       |       |       |
| Section 388                                          |         |                                                                                 |       |       |       |       |       |       |       |
| Candidatus Carsonella ruddii strain BT chromosome... | (29800) | 29800                                                                           | 29810 | 29821 | 29832 | 29843 | 29854 | 29865 | 29876 |
| Candidatus Carsonella 135557 - 167442nt              | (29800) | TTATTTTATATTGTTTACAAGTTGATAATTCTTGTCATCATCATTTGAAAACCTACCTTCTCCAGTTATTAATAATACT |       |       |       |       |       |       |       |
| SARS-CoV-2 Reference Genome NC_045512.2              | (1)     | -----                                                                           |       |       |       |       |       |       |       |
|                                                      | (1)     | -----                                                                           |       |       |       |       |       |       |       |
| Section 389                                          |         |                                                                                 |       |       |       |       |       |       |       |
| Candidatus Carsonella ruddii strain BT chromosome... | (29877) | 29877                                                                           | 29887 | 29898 | 29909 | 29920 | 29931 | 29942 | 29953 |
| Candidatus Carsonella 135557 - 167442nt              | (29877) | TTTTTATTTTTATTTGCAAATTTTATTTCCTATTGCAGAAGGAAAACCAACCCCATTTGTTCTTAATCCTCCTGATGA  |       |       |       |       |       |       |       |
| SARS-CoV-2 Reference Genome NC_045512.2              | (1)     | -----                                                                           |       |       |       |       |       |       |       |
|                                                      | (1)     | -----                                                                           |       |       |       |       |       |       |       |
| Section 390                                          |         |                                                                                 |       |       |       |       |       |       |       |
| Candidatus Carsonella ruddii strain BT chromosome... | (29954) | 29954                                                                           | 29964 | 29975 | 29986 | 29997 | 30008 | 30019 | 30030 |
| Candidatus Carsonella 135557 - 167442nt              | (29954) | AATAAATTTTTTGTAATTAAAATAATAATATTTTGCTGCAACATTTGATGTTGTCCTACATCAGTAGTTAAAAAAA    |       |       |       |       |       |       |       |
| SARS-CoV-2 Reference Genome NC_045512.2              | (1)     | -----                                                                           |       |       |       |       |       |       |       |
|                                                      | (1)     | -----                                                                           |       |       |       |       |       |       |       |

## SARS-CoV-2 &amp; Bakterien.apr

|                                                      |         |                                                                               |       |       |       |       |       |       |       |
|------------------------------------------------------|---------|-------------------------------------------------------------------------------|-------|-------|-------|-------|-------|-------|-------|
|                                                      |         | Section 391                                                                   |       |       |       |       |       |       |       |
| Candidatus Carsonella ruddii strain BT chromosome... | (30031) | 30031                                                                         | 30041 | 30052 | 30063 | 30074 | 30085 | 30096 | 30107 |
|                                                      | (30031) | ACTTTCCTTTACTAATAATAAAAAATTAATTCTATTATTTGTTGAGGCTTACAAAAAAAAAAATCATTTCATATTTT |       |       |       |       |       |       |       |
|                                                      | (1)     | -----                                                                         |       |       |       |       |       |       |       |
|                                                      | (1)     | -----                                                                         |       |       |       |       |       |       |       |
|                                                      |         | Section 392                                                                   |       |       |       |       |       |       |       |
| Candidatus Carsonella ruddii strain BT chromosome... | (30108) | 30108                                                                         | 30118 | 30129 | 30140 | 30151 | 30162 | 30173 | 30184 |
|                                                      | (30108) | TTATTAATAAAATTTTTTAAAAAAATTATTATTTCCACCAAAATTTTATATTTTGTAAAAAAATTATTTTTTAA    |       |       |       |       |       |       |       |
|                                                      | (1)     | -----                                                                         |       |       |       |       |       |       |       |
|                                                      | (1)     | -----                                                                         |       |       |       |       |       |       |       |
|                                                      |         | Section 393                                                                   |       |       |       |       |       |       |       |
| Candidatus Carsonella ruddii strain BT chromosome... | (30185) | 30185                                                                         | 30195 | 30206 | 30217 | 30228 | 30239 | 30250 | 30261 |
|                                                      | (30185) | AAAAAATTCATATCACATAAAAAAAATTTTTCACAATAAATATTTTAGAAATTGAATTTAAATCAATATCAATAT   |       |       |       |       |       |       |       |
|                                                      | (1)     | -----                                                                         |       |       |       |       |       |       |       |
|                                                      | (1)     | -----                                                                         |       |       |       |       |       |       |       |
|                                                      |         | Section 394                                                                   |       |       |       |       |       |       |       |
| Candidatus Carsonella ruddii strain BT chromosome... | (30262) | 30262                                                                         | 30272 | 30283 | 30294 | 30305 | 30316 | 30327 | 30338 |
|                                                      | (30262) | GAATAATACTTGAATATGGAGAAAATTTTTCATTATTATTTATTATTCTATCATCTAATCTAGTTCCTAAACAAATA |       |       |       |       |       |       |       |
|                                                      | (1)     | -----                                                                         |       |       |       |       |       |       |       |
|                                                      | (1)     | -----                                                                         |       |       |       |       |       |       |       |
|                                                      |         | Section 395                                                                   |       |       |       |       |       |       |       |
| Candidatus Carsonella ruddii strain BT chromosome... | (30339) | 30339                                                                         | 30349 | 30360 | 30371 | 30382 | 30393 | 30404 | 30415 |
|                                                      | (30339) | ATAATATCAGAATAATGAATTATATTATTAACACATGCATCGCCATGCATACCTAACCAACCTAAATAATACGGATT |       |       |       |       |       |       |       |
|                                                      | (1)     | -----                                                                         |       |       |       |       |       |       |       |
|                                                      | (1)     | -----                                                                         |       |       |       |       |       |       |       |
|                                                      |         | Section 396                                                                   |       |       |       |       |       |       |       |
| Candidatus Carsonella ruddii strain BT chromosome... | (30416) | 30416                                                                         | 30426 | 30437 | 30448 | 30459 | 30470 | 30481 | 30492 |
|                                                      | (30416) | TCTGTAATTAAACCTCCTAAACCCATAAAAGTTGATATAAAAGGTATTTTATTTTTTTTAAATAAAAACATCTAATA |       |       |       |       |       |       |       |
|                                                      | (1)     | -----                                                                         |       |       |       |       |       |       |       |
|                                                      | (1)     | -----                                                                         |       |       |       |       |       |       |       |

|                                                      |         |                                                                                |       |       |       |       |       |       |       |
|------------------------------------------------------|---------|--------------------------------------------------------------------------------|-------|-------|-------|-------|-------|-------|-------|
| Section 397                                          |         |                                                                                |       |       |       |       |       |       |       |
| Candidatus Carsonella ruddii strain BT chromosome... | (30493) | 30493                                                                          | 30503 | 30514 | 30525 | 30536 | 30547 | 30558 | 30569 |
| Candidatus Carsonella 135557 - 167442nt              | (30493) | ATTTTATATAATTTTTTTTTTAACAAACCTCCTCCAATTAAAAATAATAGGTCTTTTATATTTTAAATTAATAAAAAA |       |       |       |       |       |       |       |
| SARS-CoV-2 Reference Genome NC_045512.2              | (1)     | -----                                                                          |       |       |       |       |       |       |       |
|                                                      | (1)     | -----                                                                          |       |       |       |       |       |       |       |
| Section 398                                          |         |                                                                                |       |       |       |       |       |       |       |
| Candidatus Carsonella ruddii strain BT chromosome... | (30570) | 30570                                                                          | 30580 | 30591 | 30602 | 30613 | 30624 | 30635 | 30646 |
| Candidatus Carsonella 135557 - 167442nt              | (30570) | ATATTTTTATTTTTATTTTTTTTTATTTTTATAAATGGATATTTATTTCTTAATATATTTAAAGAAGAAGTTAGATC  |       |       |       |       |       |       |       |
| SARS-CoV-2 Reference Genome NC_045512.2              | (1)     | -----                                                                          |       |       |       |       |       |       |       |
|                                                      | (1)     | -----                                                                          |       |       |       |       |       |       |       |
| Section 399                                          |         |                                                                                |       |       |       |       |       |       |       |
| Candidatus Carsonella ruddii strain BT chromosome... | (30647) | 30647                                                                          | 30657 | 30668 | 30679 | 30690 | 30701 | 30712 | 30723 |
| Candidatus Carsonella 135557 - 167442nt              | (30647) | TTTTGGAAAATCTATTACTACTGGTCCTTTTTTAAACAATCATTTTTATAAAATGATTTTGAAATAATATATTGAA   |       |       |       |       |       |       |       |
| SARS-CoV-2 Reference Genome NC_045512.2              | (1)     | -----                                                                          |       |       |       |       |       |       |       |
|                                                      | (1)     | -----                                                                          |       |       |       |       |       |       |       |
| Section 400                                          |         |                                                                                |       |       |       |       |       |       |       |
| Candidatus Carsonella ruddii strain BT chromosome... | (30724) | 30724                                                                          | 30734 | 30745 | 30756 | 30767 | 30778 | 30789 | 30800 |
| Candidatus Carsonella 135557 - 167442nt              | (30724) | TATTATAATAACAATTTAAAGAATAAAATTTTTTTATTACAGAATTAGATAAAATTTAAGTTATCTAATTCTTGAAAA |       |       |       |       |       |       |       |
| SARS-CoV-2 Reference Genome NC_045512.2              | (1)     | -----                                                                          |       |       |       |       |       |       |       |
|                                                      | (1)     | -----                                                                          |       |       |       |       |       |       |       |
| Section 401                                          |         |                                                                                |       |       |       |       |       |       |       |
| Candidatus Carsonella ruddii strain BT chromosome... | (30801) | 30801                                                                          | 30811 | 30822 | 30833 | 30844 | 30855 | 30866 | 30877 |
| Candidatus Carsonella 135557 - 167442nt              | (30801) | GAATTTTGAGCTATCATTTTTTTAATTACTTGCCACATAAAATAATAATTGAAGAATTATCAAAATTAGCTGTTGC   |       |       |       |       |       |       |       |
| SARS-CoV-2 Reference Genome NC_045512.2              | (1)     | -----                                                                          |       |       |       |       |       |       |       |
|                                                      | (1)     | -----                                                                          |       |       |       |       |       |       |       |
| Section 402                                          |         |                                                                                |       |       |       |       |       |       |       |
| Candidatus Carsonella ruddii strain BT chromosome... | (30878) | 30878                                                                          | 30888 | 30899 | 30910 | 30921 | 30932 | 30943 | 30954 |
| Candidatus Carsonella 135557 - 167442nt              | (30878) | TAATCCAGTAATACAATTTGTAAATCCAGGTCCAGAAGTTACTAAACTACACCTGTTAAATTTGATGATCTTGAAT   |       |       |       |       |       |       |       |
| SARS-CoV-2 Reference Genome NC_045512.2              | (1)     | -----                                                                          |       |       |       |       |       |       |       |
|                                                      | (1)     | -----                                                                          |       |       |       |       |       |       |       |

|                                                      |         |                                                                                  |       |       |       |       |       |             |
|------------------------------------------------------|---------|----------------------------------------------------------------------------------|-------|-------|-------|-------|-------|-------------|
|                                                      |         | Section 403                                                                      |       |       |       |       |       |             |
| Candidatus Carsonella ruddii strain BT chromosome... | (30955) | 30955                                                                            | 30965 | 30976 | 30987 | 30998 | 31009 | 31020 31031 |
|                                                      | (30955) | ATCCATCAGCCATGTGTACTGCAGCTTGTTTCGTGTCTTACTAATATATGTTTTATTTTTGATGTAAATATTGCATCA   |       |       |       |       |       |             |
|                                                      | (1)     | -----                                                                            |       |       |       |       |       |             |
| Candidatus Carsonella 135557 - 167442nt              | (1)     | -----                                                                            |       |       |       |       |       |             |
| SARS-CoV-2 Reference Genome NC_045512.2              | (1)     | -----                                                                            |       |       |       |       |       |             |
|                                                      |         | Section 404                                                                      |       |       |       |       |       |             |
| Candidatus Carsonella ruddii strain BT chromosome... | (31032) | 31032                                                                            | 31042 | 31053 | 31064 | 31075 | 31086 | 31097 31108 |
|                                                      | (31032) | TAAATATGTAAACTGCACCTCCAGGATATCCGAAAACAAATTCATATTTTCTAACAATAATGATTCTATTATTAT      |       |       |       |       |       |             |
|                                                      | (1)     | -----                                                                            |       |       |       |       |       |             |
| Candidatus Carsonella 135557 - 167442nt              | (1)     | -----                                                                            |       |       |       |       |       |             |
| SARS-CoV-2 Reference Genome NC_045512.2              | (1)     | -----                                                                            |       |       |       |       |       |             |
|                                                      |         | Section 405                                                                      |       |       |       |       |       |             |
| Candidatus Carsonella ruddii strain BT chromosome... | (31109) | 31109                                                                            | 31119 | 31130 | 31141 | 31152 | 31163 | 31174 31185 |
|                                                      | (31109) | TTTTGAAGATGAAATCTTCATTTTAAAAATATTTATTAAAAAGATTTTTTTCATTTCTGTTGGTATATTACAATATAA   |       |       |       |       |       |             |
|                                                      | (1)     | -----                                                                            |       |       |       |       |       |             |
| Candidatus Carsonella 135557 - 167442nt              | (1)     | -----                                                                            |       |       |       |       |       |             |
| SARS-CoV-2 Reference Genome NC_045512.2              | (1)     | -----                                                                            |       |       |       |       |       |             |
|                                                      |         | Section 406                                                                      |       |       |       |       |       |             |
| Candidatus Carsonella ruddii strain BT chromosome... | (31186) | 31186                                                                            | 31196 | 31207 | 31218 | 31229 | 31240 | 31251 31262 |
|                                                      | (31186) | AAAAAAATTTTTCATAATTAAAGGATAAAAAAAGAAATTTTTTATGATGCAATGTATTATTAAATTTTAAGTTTT      |       |       |       |       |       |             |
|                                                      | (1)     | -----                                                                            |       |       |       |       |       |             |
| Candidatus Carsonella 135557 - 167442nt              | (1)     | -----                                                                            |       |       |       |       |       |             |
| SARS-CoV-2 Reference Genome NC_045512.2              | (1)     | -----                                                                            |       |       |       |       |       |             |
|                                                      |         | Section 407                                                                      |       |       |       |       |       |             |
| Candidatus Carsonella ruddii strain BT chromosome... | (31263) | 31263                                                                            | 31273 | 31284 | 31295 | 31306 | 31317 | 31328 31339 |
|                                                      | (31263) | TGTTATAATAAAATTCATTTTTTATTATTATTATATTAGAAAAATTTAAATGTTTTCTAATTTGATGAGTTCTTCCAGTT |       |       |       |       |       |             |
|                                                      | (1)     | -----                                                                            |       |       |       |       |       |             |
| Candidatus Carsonella 135557 - 167442nt              | (1)     | -----                                                                            |       |       |       |       |       |             |
| SARS-CoV-2 Reference Genome NC_045512.2              | (1)     | -----                                                                            |       |       |       |       |       |             |
|                                                      |         | Section 408                                                                      |       |       |       |       |       |             |
| Candidatus Carsonella ruddii strain BT chromosome... | (31340) | 31340                                                                            | 31350 | 31361 | 31372 | 31383 | 31394 | 31405 31416 |
|                                                      | (31340) | TTTATATAAATATTATAAATATTGTTTTTATATGAATTTTTTATTTTTTATAAAAAGTAATACTTTTTTTAAAAAA     |       |       |       |       |       |             |
|                                                      | (1)     | -----                                                                            |       |       |       |       |       |             |
| Candidatus Carsonella 135557 - 167442nt              | (1)     | -----                                                                            |       |       |       |       |       |             |
| SARS-CoV-2 Reference Genome NC_045512.2              | (1)     | -----                                                                            |       |       |       |       |       |             |

|                                                      |         |                                                                                |       |       |       |       |       |       |       |
|------------------------------------------------------|---------|--------------------------------------------------------------------------------|-------|-------|-------|-------|-------|-------|-------|
| Section 409                                          |         |                                                                                |       |       |       |       |       |       |       |
| Candidatus Carsonella ruddii strain BT chromosome... | (31417) | 31417                                                                          | 31427 | 31438 | 31449 | 31460 | 31471 | 31482 | 31493 |
| Candidatus Carsonella 135557 - 167442nt              | (31417) | TTTTTTTATTAAAATTTTACGTTTTTTTATAAATTGATAAATTAATAAAACCACTATTATTATTTTTTTCTACTATTG |       |       |       |       |       |       |       |
| SARS-CoV-2 Reference Genome NC_045512.2              | (1)     | -----                                                                          |       |       |       |       |       |       |       |
|                                                      | (1)     | -----                                                                          |       |       |       |       |       |       |       |
| Section 410                                          |         |                                                                                |       |       |       |       |       |       |       |
| Candidatus Carsonella ruddii strain BT chromosome... | (31494) | 31494                                                                          | 31504 | 31515 | 31526 | 31537 | 31548 | 31559 | 31570 |
| Candidatus Carsonella 135557 - 167442nt              | (31494) | TTATATAATTTTTTTTAATAATTTTTTTTAAAAATAATTTTTTTTATAAAAAAATAAAACATTAAATTTCTTGCTATT |       |       |       |       |       |       |       |
| SARS-CoV-2 Reference Genome NC_045512.2              | (1)     | -----                                                                          |       |       |       |       |       |       |       |
|                                                      | (1)     | -----                                                                          |       |       |       |       |       |       |       |
| Section 411                                          |         |                                                                                |       |       |       |       |       |       |       |
| Candidatus Carsonella ruddii strain BT chromosome... | (31571) | 31571                                                                          | 31581 | 31592 | 31603 | 31614 | 31625 | 31636 | 31647 |
| Candidatus Carsonella 135557 - 167442nt              | (31571) | AAAATTATACCAGATGTATATTTATCTAATCTATTTAAAAATTCCTTTATTTGGTAAATTATTTTTATTTTATTTTT  |       |       |       |       |       |       |       |
| SARS-CoV-2 Reference Genome NC_045512.2              | (1)     | -----                                                                          |       |       |       |       |       |       |       |
|                                                      | (1)     | -----                                                                          |       |       |       |       |       |       |       |
| Section 412                                          |         |                                                                                |       |       |       |       |       |       |       |
| Candidatus Carsonella ruddii strain BT chromosome... | (31648) | 31648                                                                          | 31658 | 31669 | 31680 | 31691 | 31702 | 31713 | 31724 |
| Candidatus Carsonella 135557 - 167442nt              | (31648) | TAACAAACTAAATATTTCTACACCTACTGGTTTATTTATAATAATTATATTCTTGTCATAATATTCAATTTTTATTT  |       |       |       |       |       |       |       |
| SARS-CoV-2 Reference Genome NC_045512.2              | (1)     | -----                                                                          |       |       |       |       |       |       |       |
|                                                      | (1)     | -----                                                                          |       |       |       |       |       |       |       |
| Section 413                                          |         |                                                                                |       |       |       |       |       |       |       |
| Candidatus Carsonella ruddii strain BT chromosome... | (31725) | 31725                                                                          | 31735 | 31746 | 31757 | 31768 | 31779 | 31790 | 31801 |
| Candidatus Carsonella 135557 - 167442nt              | (31725) | TATGCATAAAATCTAATTTCTTCTAAATTATGAAATTTATTTATATAACAAATATTACAAATATTTTTATTATATAT  |       |       |       |       |       |       |       |
| SARS-CoV-2 Reference Genome NC_045512.2              | (1)     | -----                                                                          |       |       |       |       |       |       |       |
|                                                      | (1)     | -----                                                                          |       |       |       |       |       |       |       |
| Section 414                                          |         |                                                                                |       |       |       |       |       |       |       |
| Candidatus Carsonella ruddii strain BT chromosome... | (31802) | 31802                                                                          | 31812 | 31823 | 31834 | 31845 | 31856 | 31867 | 31878 |
| Candidatus Carsonella 135557 - 167442nt              | (31802) | ATGTTTTTTAATATTTTTTATAATCTTTTGAAATTAAACAAAATAATTTTTTTTTTATTTTGTAATAATAATATTTAT |       |       |       |       |       |       |       |
| SARS-CoV-2 Reference Genome NC_045512.2              | (1)     | -----                                                                          |       |       |       |       |       |       |       |
|                                                      | (1)     | -----                                                                          |       |       |       |       |       |       |       |

## SARS-CoV-2 &amp; Bakterien.apr

|                                                      |         |                                                                               |       |       |       |       |       |       |       |
|------------------------------------------------------|---------|-------------------------------------------------------------------------------|-------|-------|-------|-------|-------|-------|-------|
|                                                      |         | Section 415                                                                   |       |       |       |       |       |       |       |
| Candidatus Carsonella ruddii strain BT chromosome... | (31879) | 31879                                                                         | 31889 | 31900 | 31911 | 31922 | 31933 | 31944 | 31955 |
|                                                      | (31879) | AATTATACCAATTCCAAAAAAATTATTAAAAAAATTTCTTTAAAAAAATATTAAAAAATTCATTTTTAATTTTA    |       |       |       |       |       |       |       |
|                                                      | (1)     | -----                                                                         |       |       |       |       |       |       |       |
| Candidatus Carsonella 135557 - 167442nt              | (1)     | -----                                                                         |       |       |       |       |       |       |       |
| SARS-CoV-2 Reference Genome NC_045512.2              | (1)     | -----                                                                         |       |       |       |       |       |       |       |
|                                                      |         | Section 416                                                                   |       |       |       |       |       |       |       |
| Candidatus Carsonella ruddii strain BT chromosome... | (31956) | 31956                                                                         | 31966 | 31977 | 31988 | 31999 | 32010 | 32021 | 32032 |
|                                                      | (31956) | TTTAATAAAATAAAAATTTTTAAAAAAATAATATCTTTTTTAATAATTTTTAATTTTTAAAAAAATAGAAAAAA    |       |       |       |       |       |       |       |
|                                                      | (1)     | -----                                                                         |       |       |       |       |       |       |       |
| Candidatus Carsonella 135557 - 167442nt              | (1)     | -----                                                                         |       |       |       |       |       |       |       |
| SARS-CoV-2 Reference Genome NC_045512.2              | (1)     | -----                                                                         |       |       |       |       |       |       |       |
|                                                      |         | Section 417                                                                   |       |       |       |       |       |       |       |
| Candidatus Carsonella ruddii strain BT chromosome... | (32033) | 32033                                                                         | 32043 | 32054 | 32065 | 32076 | 32087 | 32098 | 32109 |
|                                                      | (32033) | AACATTATTGTTTGCTATTGTTTTGTAACTTTTTTAAAAAAATTTAATTCTTTTGAAGAATAATATAAAATAG     |       |       |       |       |       |       |       |
|                                                      | (1)     | -----                                                                         |       |       |       |       |       |       |       |
| Candidatus Carsonella 135557 - 167442nt              | (1)     | -----                                                                         |       |       |       |       |       |       |       |
| SARS-CoV-2 Reference Genome NC_045512.2              | (1)     | -----                                                                         |       |       |       |       |       |       |       |
|                                                      |         | Section 418                                                                   |       |       |       |       |       |       |       |
| Candidatus Carsonella ruddii strain BT chromosome... | (32110) | 32110                                                                         | 32120 | 32131 | 32142 | 32153 | 32164 | 32175 | 32186 |
|                                                      | (32110) | GAAATAAAATTTGCTTTTAAAAAGTTTAAATATAATGAAAAATAACAACATTTTCTTATTAAAGAATTAATT      |       |       |       |       |       |       |       |
|                                                      | (1)     | -----                                                                         |       |       |       |       |       |       |       |
| Candidatus Carsonella 135557 - 167442nt              | (1)     | -----                                                                         |       |       |       |       |       |       |       |
| SARS-CoV-2 Reference Genome NC_045512.2              | (1)     | -----                                                                         |       |       |       |       |       |       |       |
|                                                      |         | Section 419                                                                   |       |       |       |       |       |       |       |
| Candidatus Carsonella ruddii strain BT chromosome... | (32187) | 32187                                                                         | 32197 | 32208 | 32219 | 32230 | 32241 | 32252 | 32263 |
|                                                      | (32187) | TTGCATATATATAAATTATATTTAATATAATTAATATATAAATCATTTATAAAAGTAATATATAATTTTATTATTTT |       |       |       |       |       |       |       |
|                                                      | (1)     | -----                                                                         |       |       |       |       |       |       |       |
| Candidatus Carsonella 135557 - 167442nt              | (1)     | -----                                                                         |       |       |       |       |       |       |       |
| SARS-CoV-2 Reference Genome NC_045512.2              | (1)     | -----                                                                         |       |       |       |       |       |       |       |
|                                                      |         | Section 420                                                                   |       |       |       |       |       |       |       |
| Candidatus Carsonella ruddii strain BT chromosome... | (32264) | 32264                                                                         | 32274 | 32285 | 32296 | 32307 | 32318 | 32329 | 32340 |
|                                                      | (32264) | AATAACATTGAAAAAATTAATATTTAAAAATAATTTTCAATTATTTTGTTTAAATATTTTGTTTTTTAATAATCC   |       |       |       |       |       |       |       |
|                                                      | (1)     | -----                                                                         |       |       |       |       |       |       |       |
| Candidatus Carsonella 135557 - 167442nt              | (1)     | -----                                                                         |       |       |       |       |       |       |       |
| SARS-CoV-2 Reference Genome NC_045512.2              | (1)     | -----                                                                         |       |       |       |       |       |       |       |

|                                                      |         |                                                                                 |       |       |       |       |       |       |             |
|------------------------------------------------------|---------|---------------------------------------------------------------------------------|-------|-------|-------|-------|-------|-------|-------------|
|                                                      |         |                                                                                 |       |       |       |       |       |       | Section 421 |
| Candidatus Carsonella ruddii strain BT chromosome... | (32341) | 32341                                                                           | 32351 | 32362 | 32373 | 32384 | 32395 | 32406 | 32417       |
|                                                      | (32341) | AATAATCAAAAAATATTTTTTTAGTATTATAAAAAATTAAATTTGTAAAAATTATTTAAAAATAAATTTAAAAAATTT  |       |       |       |       |       |       |             |
|                                                      | (1)     | -----                                                                           |       |       |       |       |       |       |             |
|                                                      | (1)     | -----                                                                           |       |       |       |       |       |       |             |
| Candidatus Carsonella 135557 - 167442nt              | (1)     |                                                                                 |       |       |       |       |       |       |             |
| SARS-CoV-2 Reference Genome NC_045512.2              | (1)     |                                                                                 |       |       |       |       |       |       |             |
|                                                      |         |                                                                                 |       |       |       |       |       |       | Section 422 |
| Candidatus Carsonella ruddii strain BT chromosome... | (32418) | 32418                                                                           | 32428 | 32439 | 32450 | 32461 | 32472 | 32483 | 32494       |
|                                                      | (32418) | CTTATTAATTTATAAGTAAATTTGTATTTTCAAAATTAACAATATTAAAAATTATATTTTTTAAATAATCATGTTT    |       |       |       |       |       |       |             |
|                                                      | (1)     | -----                                                                           |       |       |       |       |       |       |             |
|                                                      | (1)     | -----                                                                           |       |       |       |       |       |       |             |
| Candidatus Carsonella 135557 - 167442nt              | (1)     |                                                                                 |       |       |       |       |       |       |             |
| SARS-CoV-2 Reference Genome NC_045512.2              | (1)     |                                                                                 |       |       |       |       |       |       |             |
|                                                      |         |                                                                                 |       |       |       |       |       |       | Section 423 |
| Candidatus Carsonella ruddii strain BT chromosome... | (32495) | 32495                                                                           | 32505 | 32516 | 32527 | 32538 | 32549 | 32560 | 32571       |
|                                                      | (32495) | TAATAAATACAATTTAATAATTTTCATTACTATTTATTTTTTAATATATCATTTATTTTTTTAAATTTTTTAGAAGATT |       |       |       |       |       |       |             |
|                                                      | (1)     | -----                                                                           |       |       |       |       |       |       |             |
|                                                      | (1)     | -----                                                                           |       |       |       |       |       |       |             |
| Candidatus Carsonella 135557 - 167442nt              | (1)     |                                                                                 |       |       |       |       |       |       |             |
| SARS-CoV-2 Reference Genome NC_045512.2              | (1)     |                                                                                 |       |       |       |       |       |       |             |
|                                                      |         |                                                                                 |       |       |       |       |       |       | Section 424 |
| Candidatus Carsonella ruddii strain BT chromosome... | (32572) | 32572                                                                           | 32582 | 32593 | 32604 | 32615 | 32626 | 32637 | 32648       |
|                                                      | (32572) | TTGATAATTTATTTTCCTTTTATATCTATACAAAACCCATGAGAAATGATAATATTTAAATTTAAATTAAATAAATT   |       |       |       |       |       |       |             |
|                                                      | (1)     | -----                                                                           |       |       |       |       |       |       |             |
|                                                      | (1)     | -----                                                                           |       |       |       |       |       |       |             |
| Candidatus Carsonella 135557 - 167442nt              | (1)     |                                                                                 |       |       |       |       |       |       |             |
| SARS-CoV-2 Reference Genome NC_045512.2              | (1)     |                                                                                 |       |       |       |       |       |       |             |
|                                                      |         |                                                                                 |       |       |       |       |       |       | Section 425 |
| Candidatus Carsonella ruddii strain BT chromosome... | (32649) | 32649                                                                           | 32659 | 32670 | 32681 | 32692 | 32703 | 32714 | 32725       |
|                                                      | (32649) | AAAAAATTTATAATTATACAGATTGATACCAACCTCTAATTTGATCTTTACCTTCTACAATAATTTTATTATTTTT    |       |       |       |       |       |       |             |
|                                                      | (1)     | -----                                                                           |       |       |       |       |       |       |             |
|                                                      | (1)     | -----                                                                           |       |       |       |       |       |       |             |
| Candidatus Carsonella 135557 - 167442nt              | (1)     |                                                                                 |       |       |       |       |       |       |             |
| SARS-CoV-2 Reference Genome NC_045512.2              | (1)     |                                                                                 |       |       |       |       |       |       |             |
|                                                      |         |                                                                                 |       |       |       |       |       |       | Section 426 |
| Candidatus Carsonella ruddii strain BT chromosome... | (32726) | 32726                                                                           | 32736 | 32747 | 32758 | 32769 | 32780 | 32791 | 32802       |
|                                                      | (32726) | AAAAAATAAAAAATAAAATAGATGAATCAAACCAAACGTCAAAAAATATCTTTTTTAATTTTTTCTATAAAAAAATAA  |       |       |       |       |       |       |             |
|                                                      | (1)     | -----                                                                           |       |       |       |       |       |       |             |
|                                                      | (1)     | -----                                                                           |       |       |       |       |       |       |             |
| Candidatus Carsonella 135557 - 167442nt              | (1)     |                                                                                 |       |       |       |       |       |       |             |
| SARS-CoV-2 Reference Genome NC_045512.2              | (1)     |                                                                                 |       |       |       |       |       |       |             |

|                                                      |         |                                                                                  |       |       |       |       |       |             |
|------------------------------------------------------|---------|----------------------------------------------------------------------------------|-------|-------|-------|-------|-------|-------------|
| Section 427                                          |         |                                                                                  |       |       |       |       |       |             |
| Candidatus Carsonella ruddii strain BT chromosome... | (32803) | 32803                                                                            | 32813 | 32824 | 32835 | 32846 | 32857 | 32868 32879 |
| Candidatus Carsonella 135557 - 167442nt              | (32803) | TATGAGAACTAAATGTTTTGATTAAATTTTTATAAAAAAGAAATTTTTTTATTATTATTAATATAATAGGAACACCCCAA |       |       |       |       |       |             |
| SARS-CoV-2 Reference Genome NC_045512.2              | (1)     | -----                                                                            |       |       |       |       |       |             |
|                                                      | (1)     | -----                                                                            |       |       |       |       |       |             |
| Section 428                                          |         |                                                                                  |       |       |       |       |       |             |
| Candidatus Carsonella ruddii strain BT chromosome... | (32880) | 32880                                                                            | 32890 | 32901 | 32912 | 32923 | 32934 | 32945 32956 |
| Candidatus Carsonella 135557 - 167442nt              | (32880) | TATCTTTGTCTAGAAATACACCAATTATTTCTAAAATTAATCATATTAAATAAAAGTTTTTTTAAATAAAAAAAGGAAA  |       |       |       |       |       |             |
| SARS-CoV-2 Reference Genome NC_045512.2              | (1)     | -----                                                                            |       |       |       |       |       |             |
|                                                      | (1)     | -----                                                                            |       |       |       |       |       |             |
| Section 429                                          |         |                                                                                  |       |       |       |       |       |             |
| Candidatus Carsonella ruddii strain BT chromosome... | (32957) | 32957                                                                            | 32967 | 32978 | 32989 | 33000 | 33011 | 33022 33033 |
| Candidatus Carsonella 135557 - 167442nt              | (32957) | AAAAGAAATTTTCTTCATTTTTTTAAGTAAAATTTTTTTTATATTAATGTTTTTAAATTTAAATTTAAATCTATAA     |       |       |       |       |       |             |
| SARS-CoV-2 Reference Genome NC_045512.2              | (1)     | -----                                                                            |       |       |       |       |       |             |
|                                                      | (1)     | -----                                                                            |       |       |       |       |       |             |
| Section 430                                          |         |                                                                                  |       |       |       |       |       |             |
| Candidatus Carsonella ruddii strain BT chromosome... | (33034) | 33034                                                                            | 33044 | 33055 | 33066 | 33077 | 33088 | 33099 33110 |
| Candidatus Carsonella 135557 - 167442nt              | (33034) | AAATTTGATTACTTAAATAATAAAAAATTGGTTTTTTATGTCTCCAACAAAACATATAATTATGATTTATTTTTTCA    |       |       |       |       |       |             |
| SARS-CoV-2 Reference Genome NC_045512.2              | (1)     | -----                                                                            |       |       |       |       |       |             |
|                                                      | (1)     | -----                                                                            |       |       |       |       |       |             |
| Section 431                                          |         |                                                                                  |       |       |       |       |       |             |
| Candidatus Carsonella ruddii strain BT chromosome... | (33111) | 33111                                                                            | 33121 | 33132 | 33143 | 33154 | 33165 | 33176 33187 |
| Candidatus Carsonella 135557 - 167442nt              | (33111) | ATTTTTTAAATTTATTTTTCTTTTTTTTAAATTTTAAAAATAATTTTATTAAAAATAAAAAATATTAATATTATTTAA   |       |       |       |       |       |             |
| SARS-CoV-2 Reference Genome NC_045512.2              | (1)     | -----                                                                            |       |       |       |       |       |             |
|                                                      | (1)     | -----                                                                            |       |       |       |       |       |             |
| Section 432                                          |         |                                                                                  |       |       |       |       |       |             |
| Candidatus Carsonella ruddii strain BT chromosome... | (33188) | 33188                                                                            | 33198 | 33209 | 33220 | 33231 | 33242 | 33253 33264 |
| Candidatus Carsonella 135557 - 167442nt              | (33188) | AATTTTAATTAATTTAATAAAAAACTTTTTATTAAAAAAATTTATATTGTTTTTTTTATTATAAATTTTCATAATCTT   |       |       |       |       |       |             |
| SARS-CoV-2 Reference Genome NC_045512.2              | (1)     | -----                                                                            |       |       |       |       |       |             |
|                                                      | (1)     | -----                                                                            |       |       |       |       |       |             |



|                                                      |         |                                                                                 |       |       |       |       |       |       |       |
|------------------------------------------------------|---------|---------------------------------------------------------------------------------|-------|-------|-------|-------|-------|-------|-------|
| Section 433                                          |         |                                                                                 |       |       |       |       |       |       |       |
| Candidatus Carsonella ruddii strain BT chromosome... | (33265) | 33265                                                                           | 33275 | 33286 | 33297 | 33308 | 33319 | 33330 | 33341 |
| Candidatus Carsonella 135557 - 167442nt              | (33265) | CTAATCCATTAGAAGGAGCACAAATGAATAAAACCGCTTCCTATATTTATATCTATAAAATTATTATTAATAAAAAAGA |       |       |       |       |       |       |       |
| SARS-CoV-2 Reference Genome NC_045512.2              | (1)     | -----                                                                           |       |       |       |       |       |       |       |
|                                                      | (1)     | -----                                                                           |       |       |       |       |       |       |       |
| Section 434                                          |         |                                                                                 |       |       |       |       |       |       |       |
| Candidatus Carsonella ruddii strain BT chromosome... | (33342) | 33342                                                                           | 33352 | 33363 | 33374 | 33385 | 33396 | 33407 | 33418 |
| Candidatus Carsonella 135557 - 167442nt              | (33342) | TTTTTTTTATTATAATATAAAAAAATATTTTTTAAAAATAAAAAAATATTTTTTTATTAAAAAAAATTTCCATTAAT   |       |       |       |       |       |       |       |
| SARS-CoV-2 Reference Genome NC_045512.2              | (1)     | -----                                                                           |       |       |       |       |       |       |       |
|                                                      | (1)     | -----                                                                           |       |       |       |       |       |       |       |
| Section 435                                          |         |                                                                                 |       |       |       |       |       |       |       |
| Candidatus Carsonella ruddii strain BT chromosome... | (33419) | 33419                                                                           | 33429 | 33440 | 33451 | 33462 | 33473 | 33484 | 33495 |
| Candidatus Carsonella 135557 - 167442nt              | (33419) | AAAAGAAAAAATTTTCTTTTATTTTTTAAAAATTTTATTATTTTATATATTAAAAAATTAGAAAAAATTAATTTGC    |       |       |       |       |       |       |       |
| SARS-CoV-2 Reference Genome NC_045512.2              | (1)     | -----                                                                           |       |       |       |       |       |       |       |
|                                                      | (1)     | -----                                                                           |       |       |       |       |       |       |       |
| Section 436                                          |         |                                                                                 |       |       |       |       |       |       |       |
| Candidatus Carsonella ruddii strain BT chromosome... | (33496) | 33496                                                                           | 33506 | 33517 | 33528 | 33539 | 33550 | 33561 | 33572 |
| Candidatus Carsonella 135557 - 167442nt              | (33496) | TATTTTTAGTTTTAAAAATAACATAAATTTGATTTTTTAAAAAATAAGCTTGATTATTAATAATAGACCATAAA      |       |       |       |       |       |       |       |
| SARS-CoV-2 Reference Genome NC_045512.2              | (1)     | -----                                                                           |       |       |       |       |       |       |       |
|                                                      | (1)     | -----                                                                           |       |       |       |       |       |       |       |
| Section 437                                          |         |                                                                                 |       |       |       |       |       |       |       |
| Candidatus Carsonella ruddii strain BT chromosome... | (33573) | 33573                                                                           | 33583 | 33594 | 33605 | 33616 | 33627 | 33638 | 33649 |
| Candidatus Carsonella 135557 - 167442nt              | (33573) | GTTGTTGTCCATATAATTATTAAAAATTTTAATAATTTAATTTTTATATAAAAAGAATAAGAATTTATTTTTTTATA   |       |       |       |       |       |       |       |
| SARS-CoV-2 Reference Genome NC_045512.2              | (1)     | -----                                                                           |       |       |       |       |       |       |       |
|                                                      | (1)     | -----                                                                           |       |       |       |       |       |       |       |
| Section 438                                          |         |                                                                                 |       |       |       |       |       |       |       |
| Candidatus Carsonella ruddii strain BT chromosome... | (33650) | 33650                                                                           | 33660 | 33671 | 33682 | 33693 | 33704 | 33715 | 33726 |
| Candidatus Carsonella 135557 - 167442nt              | (33650) | TAAATTTTCAGAATATGATAAAGAAGAACAACATTTAAACACCATAAAATTGGTATTTTTTCTTTTTTTATTATTT    |       |       |       |       |       |       |       |
| SARS-CoV-2 Reference Genome NC_045512.2              | (1)     | -----                                                                           |       |       |       |       |       |       |       |
|                                                      | (1)     | -----                                                                           |       |       |       |       |       |       |       |

## SARS-CoV-2 &amp; Bakterien.apr

|                                                      |         |                                                                                |       |       |       |       |       |       |       |
|------------------------------------------------------|---------|--------------------------------------------------------------------------------|-------|-------|-------|-------|-------|-------|-------|
|                                                      |         | Section 439                                                                    |       |       |       |       |       |       |       |
| Candidatus Carsonella ruddii strain BT chromosome... | (33727) | 33727                                                                          | 33737 | 33748 | 33759 | 33770 | 33781 | 33792 | 33803 |
|                                                      | (33727) | TATTTAAATATAAATAATTAAATATTTTATATTGAAAAGATTTCATATCTTGTTGTCATTGTATTGTATGAATAATAA |       |       |       |       |       |       |       |
|                                                      | (1)     | -----                                                                          |       |       |       |       |       |       |       |
| Candidatus Carsonella 135557 - 167442nt              | (1)     | -----                                                                          |       |       |       |       |       |       |       |
| SARS-CoV-2 Reference Genome NC_045512.2              | (1)     | -----                                                                          |       |       |       |       |       |       |       |
|                                                      |         | Section 440                                                                    |       |       |       |       |       |       |       |
| Candidatus Carsonella ruddii strain BT chromosome... | (33804) | 33804                                                                          | 33814 | 33825 | 33836 | 33847 | 33858 | 33869 | 33880 |
|                                                      | (33804) | TTATTTAAATAATTAAATAATTAATCTTTTTTTGTTTATTAATTATATTACAAACAAATTTTCTACATTTAAT      |       |       |       |       |       |       |       |
|                                                      | (1)     | -----                                                                          |       |       |       |       |       |       |       |
| Candidatus Carsonella 135557 - 167442nt              | (1)     | -----                                                                          |       |       |       |       |       |       |       |
| SARS-CoV-2 Reference Genome NC_045512.2              | (1)     | -----                                                                          |       |       |       |       |       |       |       |
|                                                      |         | Section 441                                                                    |       |       |       |       |       |       |       |
| Candidatus Carsonella ruddii strain BT chromosome... | (33881) | 33881                                                                          | 33891 | 33902 | 33913 | 33924 | 33935 | 33946 | 33957 |
|                                                      | (33881) | AAAAAAAAAATTATTTTATATAATTTAATTGTTCAATAGGTAAACCATGACAATCCCATCCTAAATTTGATAACAATA |       |       |       |       |       |       |       |
|                                                      | (1)     | -----                                                                          |       |       |       |       |       |       |       |
| Candidatus Carsonella 135557 - 167442nt              | (1)     | -----                                                                          |       |       |       |       |       |       |       |
| SARS-CoV-2 Reference Genome NC_045512.2              | (1)     | -----                                                                          |       |       |       |       |       |       |       |
|                                                      |         | Section 442                                                                    |       |       |       |       |       |       |       |
| Candidatus Carsonella ruddii strain BT chromosome... | (33958) | 33958                                                                          | 33968 | 33979 | 33990 | 34001 | 34012 | 34023 | 34034 |
|                                                      | (33958) | AAAAATTTTTATTATAAAAAAATTTAATTAAAGAACTTTTATAGTTTTGTTTAATATATGACCAATATGAATTTTCG  |       |       |       |       |       |       |       |
|                                                      | (1)     | -----                                                                          |       |       |       |       |       |       |       |
| Candidatus Carsonella 135557 - 167442nt              | (1)     | -----                                                                          |       |       |       |       |       |       |       |
| SARS-CoV-2 Reference Genome NC_045512.2              | (1)     | -----                                                                          |       |       |       |       |       |       |       |
|                                                      |         | Section 443                                                                    |       |       |       |       |       |       |       |
| Candidatus Carsonella ruddii strain BT chromosome... | (34035) | 34035                                                                          | 34045 | 34056 | 34067 | 34078 | 34089 | 34100 | 34111 |
|                                                      | (34035) | CCATTAGCAAAAGGTGGACCATCCAATAAAAAACATTTATTACTTTATTATTTAAATATAATGAATATTATTTT     |       |       |       |       |       |       |       |
|                                                      | (1)     | -----                                                                          |       |       |       |       |       |       |       |
| Candidatus Carsonella 135557 - 167442nt              | (1)     | -----                                                                          |       |       |       |       |       |       |       |
| SARS-CoV-2 Reference Genome NC_045512.2              | (1)     | -----                                                                          |       |       |       |       |       |       |       |
|                                                      |         | Section 444                                                                    |       |       |       |       |       |       |       |
| Candidatus Carsonella ruddii strain BT chromosome... | (34112) | 34112                                                                          | 34122 | 34133 | 34144 | 34155 | 34166 | 34177 | 34188 |
|                                                      | (34112) | AATATTTATTGTTTTTTTTAAATTTGCTTTCATTAAATATTTTTTCTAGGCAAATTTAACATATTTAAATATTTT    |       |       |       |       |       |       |       |
|                                                      | (1)     | -----                                                                          |       |       |       |       |       |       |       |
| Candidatus Carsonella 135557 - 167442nt              | (1)     | -----                                                                          |       |       |       |       |       |       |       |
| SARS-CoV-2 Reference Genome NC_045512.2              | (1)     | -----                                                                          |       |       |       |       |       |       |       |

|                                                      |         |                                                                                 |       |       |       |       |       |       |       |
|------------------------------------------------------|---------|---------------------------------------------------------------------------------|-------|-------|-------|-------|-------|-------|-------|
| Section 445                                          |         |                                                                                 |       |       |       |       |       |       |       |
| Candidatus Carsonella ruddii strain BT chromosome... | (34189) | 34189                                                                           | 34199 | 34210 | 34221 | 34232 | 34243 | 34254 | 34265 |
| Candidatus Carsonella 135557 - 167442nt              | (34189) | GATTTGTATTTAGAAAGATAATTTTTTATTATTTATTTTTTTATCGAAAAAAGAATAAATTTTCATTTAAATTTTCAAT |       |       |       |       |       |       |       |
| SARS-CoV-2 Reference Genome NC_045512.2              | (1)     | -----                                                                           |       |       |       |       |       |       |       |
|                                                      | (1)     | -----                                                                           |       |       |       |       |       |       |       |
| Section 446                                          |         |                                                                                 |       |       |       |       |       |       |       |
| Candidatus Carsonella ruddii strain BT chromosome... | (34266) | 34266                                                                           | 34276 | 34287 | 34298 | 34309 | 34320 | 34331 | 34342 |
| Candidatus Carsonella 135557 - 167442nt              | (34266) | TTTTTTATTTTTTATTTTTCTTATAAATTTTTTTATTAACAATTTTTCATAGTTTTAAAAAATGAAAGAATTTTTT    |       |       |       |       |       |       |       |
| SARS-CoV-2 Reference Genome NC_045512.2              | (1)     | -----                                                                           |       |       |       |       |       |       |       |
|                                                      | (1)     | -----                                                                           |       |       |       |       |       |       |       |
| Section 447                                          |         |                                                                                 |       |       |       |       |       |       |       |
| Candidatus Carsonella ruddii strain BT chromosome... | (34343) | 34343                                                                           | 34353 | 34364 | 34375 | 34386 | 34397 | 34408 | 34419 |
| Candidatus Carsonella 135557 - 167442nt              | (34343) | ATAACCTAAATTAAAAACACTAGATACCATAAAATAAGGTGTTATTATTAAATTTATTTTTTTTTATTTTACTAAAAA  |       |       |       |       |       |       |       |
| SARS-CoV-2 Reference Genome NC_045512.2              | (1)     | -----                                                                           |       |       |       |       |       |       |       |
|                                                      | (1)     | -----                                                                           |       |       |       |       |       |       |       |
| Section 448                                          |         |                                                                                 |       |       |       |       |       |       |       |
| Candidatus Carsonella ruddii strain BT chromosome... | (34420) | 34420                                                                           | 34430 | 34441 | 34452 | 34463 | 34474 | 34485 | 34496 |
| Candidatus Carsonella 135557 - 167442nt              | (34420) | AAAAAACATTTTCAATTCCATCTATTATAATCCAATAATTTATATTATTTAAATTTTTAATATATAAAAAATATAAA   |       |       |       |       |       |       |       |
| SARS-CoV-2 Reference Genome NC_045512.2              | (1)     | -----                                                                           |       |       |       |       |       |       |       |
|                                                      | (1)     | -----                                                                           |       |       |       |       |       |       |       |
| Section 449                                          |         |                                                                                 |       |       |       |       |       |       |       |
| Candidatus Carsonella ruddii strain BT chromosome... | (34497) | 34497                                                                           | 34507 | 34518 | 34529 | 34540 | 34551 | 34562 | 34573 |
| Candidatus Carsonella 135557 - 167442nt              | (34497) | AAAAATTTTATTAATTTAAAAAATATTTTAAAAAATAATAAATTTATATAAAAAATATAAATTTTAGAAATAAAAT    |       |       |       |       |       |       |       |
| SARS-CoV-2 Reference Genome NC_045512.2              | (1)     | -----                                                                           |       |       |       |       |       |       |       |
|                                                      | (1)     | -----                                                                           |       |       |       |       |       |       |       |
| Section 450                                          |         |                                                                                 |       |       |       |       |       |       |       |
| Candidatus Carsonella ruddii strain BT chromosome... | (34574) | 34574                                                                           | 34584 | 34595 | 34606 | 34617 | 34628 | 34639 | 34650 |
| Candidatus Carsonella 135557 - 167442nt              | (34574) | ATTTTATATAATTAAATTTGTTTAATAAAAAATTTTCAGAAATATTAATATAACATTTATAATAAAAAATATTTGAAAT |       |       |       |       |       |       |       |
| SARS-CoV-2 Reference Genome NC_045512.2              | (1)     | -----                                                                           |       |       |       |       |       |       |       |
|                                                      | (1)     | -----                                                                           |       |       |       |       |       |       |       |

## SARS-CoV-2 &amp; Bakterien.apr

|                                                      |         |                                                                               |       |       |       |       |       |       |       |
|------------------------------------------------------|---------|-------------------------------------------------------------------------------|-------|-------|-------|-------|-------|-------|-------|
|                                                      |         | Section 451                                                                   |       |       |       |       |       |       |       |
| Candidatus Carsonella ruddii strain BT chromosome... | (34651) | 34651                                                                         | 34661 | 34672 | 34683 | 34694 | 34705 | 34716 | 34727 |
|                                                      | (34651) | TAATTTTTATAAAAATAATTTTACCTTGTTTTCCAAAATTAGCAATTTTGAATTATAAAAAATTTTATAACAAAA   |       |       |       |       |       |       |       |
|                                                      | (1)     | -----                                                                         |       |       |       |       |       |       |       |
| Candidatus Carsonella 135557 - 167442nt              | (1)     | -----                                                                         |       |       |       |       |       |       |       |
| SARS-CoV-2 Reference Genome NC_045512.2              | (1)     | -----                                                                         |       |       |       |       |       |       |       |
|                                                      |         | Section 452                                                                   |       |       |       |       |       |       |       |
| Candidatus Carsonella ruddii strain BT chromosome... | (34728) | 34728                                                                         | 34738 | 34749 | 34760 | 34771 | 34782 | 34793 | 34804 |
|                                                      | (34728) | TTTCCATTACCTCCTTTTCCTCCTTTTAATATTTTAATAAAATAATTGTTTTAACAATATAAATTTTTTTTTTATT  |       |       |       |       |       |       |       |
|                                                      | (1)     | -----                                                                         |       |       |       |       |       |       |       |
| Candidatus Carsonella 135557 - 167442nt              | (1)     | -----                                                                         |       |       |       |       |       |       |       |
| SARS-CoV-2 Reference Genome NC_045512.2              | (1)     | -----                                                                         |       |       |       |       |       |       |       |
|                                                      |         | Section 453                                                                   |       |       |       |       |       |       |       |
| Candidatus Carsonella ruddii strain BT chromosome... | (34805) | 34805                                                                         | 34815 | 34826 | 34837 | 34848 | 34859 | 34870 | 34881 |
|                                                      | (34805) | TAATGTTATTATTACACCTAAAGATATTTTTATTATTAAATCTTACCTTTTTTCCTTTTTTGTTATTTTTTTCAC   |       |       |       |       |       |       |       |
|                                                      | (1)     | -----                                                                         |       |       |       |       |       |       |       |
| Candidatus Carsonella 135557 - 167442nt              | (1)     | -----                                                                         |       |       |       |       |       |       |       |
| SARS-CoV-2 Reference Genome NC_045512.2              | (1)     | -----                                                                         |       |       |       |       |       |       |       |
|                                                      |         | Section 454                                                                   |       |       |       |       |       |       |       |
| Candidatus Carsonella ruddii strain BT chromosome... | (34882) | 34882                                                                         | 34892 | 34903 | 34914 | 34925 | 34936 | 34947 | 34958 |
|                                                      | (34882) | CATTTTTACCATTTTTTGAAATAAATAAATTATTATTTGGTAATTTAAAATTATTATTAGATAATAAATATAAATCA |       |       |       |       |       |       |       |
|                                                      | (1)     | -----                                                                         |       |       |       |       |       |       |       |
| Candidatus Carsonella 135557 - 167442nt              | (1)     | -----                                                                         |       |       |       |       |       |       |       |
| SARS-CoV-2 Reference Genome NC_045512.2              | (1)     | -----                                                                         |       |       |       |       |       |       |       |
|                                                      |         | Section 455                                                                   |       |       |       |       |       |       |       |
| Candidatus Carsonella ruddii strain BT chromosome... | (34959) | 34959                                                                         | 34969 | 34980 | 34991 | 35002 | 35013 | 35024 | 35035 |
|                                                      | (34959) | CCACCATCACCACCATCACCTCCATTAGCATAAAATTTCCATTTAAAAATTTATAACTAATACAACCATTTCTCC   |       |       |       |       |       |       |       |
|                                                      | (1)     | -----                                                                         |       |       |       |       |       |       |       |
| Candidatus Carsonella 135557 - 167442nt              | (1)     | -----                                                                         |       |       |       |       |       |       |       |
| SARS-CoV-2 Reference Genome NC_045512.2              | (1)     | -----                                                                         |       |       |       |       |       |       |       |
|                                                      |         | Section 456                                                                   |       |       |       |       |       |       |       |
| Candidatus Carsonella ruddii strain BT chromosome... | (35036) | 35036                                                                         | 35046 | 35057 | 35068 | 35079 | 35090 | 35101 | 35112 |
|                                                      | (35036) | TTTACCACTTTTTAAAGTAAATATTTTCAATAAACATTATTAACCTCTATAAAAGTTTTATTTTTTTTTTTTTTA   |       |       |       |       |       |       |       |
|                                                      | (1)     | -----                                                                         |       |       |       |       |       |       |       |
| Candidatus Carsonella 135557 - 167442nt              | (1)     | -----                                                                         |       |       |       |       |       |       |       |
| SARS-CoV-2 Reference Genome NC_045512.2              | (1)     | -----                                                                         |       |       |       |       |       |       |       |

|                                                      |         |                                                                                |       |       |       |       |       |       |       |
|------------------------------------------------------|---------|--------------------------------------------------------------------------------|-------|-------|-------|-------|-------|-------|-------|
|                                                      |         | Section 457                                                                    |       |       |       |       |       |       |       |
| Candidatus Carsonella ruddii strain BT chromosome... | (35113) | 35113                                                                          | 35123 | 35134 | 35145 | 35156 | 35167 | 35178 | 35189 |
|                                                      | (35113) | ATTAATACTATTCCATTTATTAATGACTGTATATAATAATTTTTTGAATAAAAAAGTATTTTTTCTGAAATTATTTT  |       |       |       |       |       |       |       |
|                                                      | (1)     | -----                                                                          |       |       |       |       |       |       |       |
| Candidatus Carsonella 135557 - 167442nt              | (1)     | -----                                                                          |       |       |       |       |       |       |       |
| SARS-CoV-2 Reference Genome NC_045512.2              | (1)     | -----                                                                          |       |       |       |       |       |       |       |
|                                                      |         | Section 458                                                                    |       |       |       |       |       |       |       |
| Candidatus Carsonella ruddii strain BT chromosome... | (35190) | 35190                                                                          | 35200 | 35211 | 35222 | 35233 | 35244 | 35255 | 35266 |
|                                                      | (35190) | AGAACCATTTTGTTTAATTATTATAGATCCTTTATTAACATAATTATTATTATAAAATTTTAAATCCTAATCTTTTAG |       |       |       |       |       |       |       |
|                                                      | (1)     | -----                                                                          |       |       |       |       |       |       |       |
| Candidatus Carsonella 135557 - 167442nt              | (1)     | -----                                                                          |       |       |       |       |       |       |       |
| SARS-CoV-2 Reference Genome NC_045512.2              | (1)     | -----                                                                          |       |       |       |       |       |       |       |
|                                                      |         | Section 459                                                                    |       |       |       |       |       |       |       |
| Candidatus Carsonella ruddii strain BT chromosome... | (35267) | 35267                                                                          | 35277 | 35288 | 35299 | 35310 | 35321 | 35332 | 35343 |
|                                                      | (35267) | AAATAGAATCTCTTCCATTTCTCGTACTACCTCCAGCTTTTTTTGTGCCATATTAAATTATATTTTGTAAAAATAA   |       |       |       |       |       |       |       |
|                                                      | (1)     | -----                                                                          |       |       |       |       |       |       |       |
| Candidatus Carsonella 135557 - 167442nt              | (1)     | -----                                                                          |       |       |       |       |       |       |       |
| SARS-CoV-2 Reference Genome NC_045512.2              | (1)     | -----                                                                          |       |       |       |       |       |       |       |
|                                                      |         | Section 460                                                                    |       |       |       |       |       |       |       |
| Candidatus Carsonella ruddii strain BT chromosome... | (35344) | 35344                                                                          | 35354 | 35365 | 35376 | 35387 | 35398 | 35409 | 35420 |
|                                                      | (35344) | TAAACTTTTTTTTTTATAATTTATATTAGTTTTTAAAAAATTTTTCTTCTTTTTTTTTTATAGATATAGATTTTA    |       |       |       |       |       |       |       |
|                                                      | (1)     | -----                                                                          |       |       |       |       |       |       |       |
| Candidatus Carsonella 135557 - 167442nt              | (1)     | -----                                                                          |       |       |       |       |       |       |       |
| SARS-CoV-2 Reference Genome NC_045512.2              | (1)     | -----                                                                          |       |       |       |       |       |       |       |
|                                                      |         | Section 461                                                                    |       |       |       |       |       |       |       |
| Candidatus Carsonella ruddii strain BT chromosome... | (35421) | 35421                                                                          | 35431 | 35442 | 35453 | 35464 | 35475 | 35486 | 35497 |
|                                                      | (35421) | TATAAAAATGTTTTTAAATTTATAAAACATGCTTTTAAATTTAAACCTTTTTTATCTAAATTTATTTTTTTATTTAAA |       |       |       |       |       |       |       |
|                                                      | (1)     | -----                                                                          |       |       |       |       |       |       |       |
| Candidatus Carsonella 135557 - 167442nt              | (1)     | -----                                                                          |       |       |       |       |       |       |       |
| SARS-CoV-2 Reference Genome NC_045512.2              | (1)     | -----                                                                          |       |       |       |       |       |       |       |
|                                                      |         | Section 462                                                                    |       |       |       |       |       |       |       |
| Candidatus Carsonella ruddii strain BT chromosome... | (35498) | 35498                                                                          | 35508 | 35519 | 35530 | 35541 | 35552 | 35563 | 35574 |
|                                                      | (35498) | AAAAAAAATATTTTTTTTAAAAAAATTTTTTTACCAATATTTTTATTTATATAATCAACAATTAAAAAATTATTTAA  |       |       |       |       |       |       |       |
|                                                      | (1)     | -----                                                                          |       |       |       |       |       |       |       |
| Candidatus Carsonella 135557 - 167442nt              | (1)     | -----                                                                          |       |       |       |       |       |       |       |
| SARS-CoV-2 Reference Genome NC_045512.2              | (1)     | -----                                                                          |       |       |       |       |       |       |       |

## SARS-CoV-2 &amp; Bakterien.apr

|                                                      |         |                                                                                 |       |       |       |       |       |       |       |
|------------------------------------------------------|---------|---------------------------------------------------------------------------------|-------|-------|-------|-------|-------|-------|-------|
|                                                      |         | Section 463                                                                     |       |       |       |       |       |       |       |
| Candidatus Carsonella ruddii strain BT chromosome... | (35575) | 35575                                                                           | 35585 | 35596 | 35607 | 35618 | 35629 | 35640 | 35651 |
|                                                      | (35575) | TTTTGAAAAATAAATTTTTTTTACCTATACAAAAAGATAACAAATTATTTAATTTTATCATTTTTTAAAAATATTATTA |       |       |       |       |       |       |       |
|                                                      | (1)     | -----                                                                           |       |       |       |       |       |       |       |
| Candidatus Carsonella 135557 - 167442nt              | (1)     | -----                                                                           |       |       |       |       |       |       |       |
| SARS-CoV-2 Reference Genome NC_045512.2              | (1)     | -----                                                                           |       |       |       |       |       |       |       |
|                                                      |         | Section 464                                                                     |       |       |       |       |       |       |       |
| Candidatus Carsonella ruddii strain BT chromosome... | (35652) | 35652                                                                           | 35662 | 35673 | 35684 | 35695 | 35706 | 35717 | 35728 |
|                                                      | (35652) | TTATAATAATTAAAAACACCAAGTTCACCAATTAAAGAACAATCACCTTTTCTATATCCTATTTTTATTAAATAAAA   |       |       |       |       |       |       |       |
|                                                      | (1)     | -----                                                                           |       |       |       |       |       |       |       |
| Candidatus Carsonella 135557 - 167442nt              | (1)     | -----                                                                           |       |       |       |       |       |       |       |
| SARS-CoV-2 Reference Genome NC_045512.2              | (1)     | -----                                                                           |       |       |       |       |       |       |       |
|                                                      |         | Section 465                                                                     |       |       |       |       |       |       |       |
| Candidatus Carsonella ruddii strain BT chromosome... | (35729) | 35729                                                                           | 35739 | 35750 | 35761 | 35772 | 35783 | 35794 | 35805 |
|                                                      | (35729) | AAAAATTTTTTTTTTAAATAATTATTTAAAAAGAATAAAAAATTTAATTTTATTTTTTTTTTAATTTAAATAATTAC   |       |       |       |       |       |       |       |
|                                                      | (1)     | -----                                                                           |       |       |       |       |       |       |       |
| Candidatus Carsonella 135557 - 167442nt              | (1)     | -----                                                                           |       |       |       |       |       |       |       |
| SARS-CoV-2 Reference Genome NC_045512.2              | (1)     | -----                                                                           |       |       |       |       |       |       |       |
|                                                      |         | Section 466                                                                     |       |       |       |       |       |       |       |
| Candidatus Carsonella ruddii strain BT chromosome... | (35806) | 35806                                                                           | 35816 | 35827 | 35838 | 35849 | 35860 | 35871 | 35882 |
|                                                      | (35806) | TTTTAATTTTACCAAATTTTATTAAATTAAAAAACAAATTATTTATAAATTTTTTTTTTAAATTTGATTTTCATATTC  |       |       |       |       |       |       |       |
|                                                      | (1)     | -----                                                                           |       |       |       |       |       |       |       |
| Candidatus Carsonella 135557 - 167442nt              | (1)     | -----                                                                           |       |       |       |       |       |       |       |
| SARS-CoV-2 Reference Genome NC_045512.2              | (1)     | -----                                                                           |       |       |       |       |       |       |       |
|                                                      |         | Section 467                                                                     |       |       |       |       |       |       |       |
| Candidatus Carsonella ruddii strain BT chromosome... | (35883) | 35883                                                                           | 35893 | 35904 | 35915 | 35926 | 35937 | 35948 | 35959 |
|                                                      | (35883) | AATTTTTACATTTAATTTTAAATTTTTTGTTTTTTAAAGCATTTGATATTTCTAAAAATACAAATTTATTCATATTTT  |       |       |       |       |       |       |       |
|                                                      | (1)     | -----                                                                           |       |       |       |       |       |       |       |
| Candidatus Carsonella 135557 - 167442nt              | (1)     | -----                                                                           |       |       |       |       |       |       |       |
| SARS-CoV-2 Reference Genome NC_045512.2              | (1)     | -----                                                                           |       |       |       |       |       |       |       |
|                                                      |         | Section 468                                                                     |       |       |       |       |       |       |       |
| Candidatus Carsonella ruddii strain BT chromosome... | (35960) | 35960                                                                           | 35970 | 35981 | 35992 | 36003 | 36014 | 36025 | 36036 |
|                                                      | (35960) | TTAATTTAAATAAATCAAATTCCTGATAATTTAATCAAGTCTCCTATTAAAAAATGTTGTTTCTTTTAAATATATTT   |       |       |       |       |       |       |       |
|                                                      | (1)     | -----                                                                           |       |       |       |       |       |       |       |
| Candidatus Carsonella 135557 - 167442nt              | (1)     | -----                                                                           |       |       |       |       |       |       |       |
| SARS-CoV-2 Reference Genome NC_045512.2              | (1)     | -----                                                                           |       |       |       |       |       |       |       |

|                                                      |         |                                                                                |       |       |       |       |       |       |       |
|------------------------------------------------------|---------|--------------------------------------------------------------------------------|-------|-------|-------|-------|-------|-------|-------|
| Section 469                                          |         |                                                                                |       |       |       |       |       |       |       |
| Candidatus Carsonella ruddii strain BT chromosome... | (36037) | 36037                                                                          | 36047 | 36058 | 36069 | 36080 | 36091 | 36102 | 36113 |
| Candidatus Carsonella 135557 - 167442nt              | (36037) | GAAGTTTTTATACTTAATTCTAAATTATCTACTGATCTAATAAATATAGGATTAATACTTAAAAAATTTTTTTTTTTT |       |       |       |       |       |       |       |
| SARS-CoV-2 Reference Genome NC_045512.2              | (1)     | -----                                                                          |       |       |       |       |       |       |       |
|                                                      | (1)     | -----                                                                          |       |       |       |       |       |       |       |
| Section 470                                          |         |                                                                                |       |       |       |       |       |       |       |
| Candidatus Carsonella ruddii strain BT chromosome... | (36114) | 36114                                                                          | 36124 | 36135 | 36146 | 36157 | 36168 | 36179 | 36190 |
| Candidatus Carsonella 135557 - 167442nt              | (36114) | AATTTTTTTTTGTTTTTTTTTTTCTCTAAACTGAAAAAAAAACATCAAAATATTTTTTTATATAAAATATACAATTAT |       |       |       |       |       |       |       |
| SARS-CoV-2 Reference Genome NC_045512.2              | (1)     | -----                                                                          |       |       |       |       |       |       |       |
|                                                      | (1)     | -----                                                                          |       |       |       |       |       |       |       |
| Section 471                                          |         |                                                                                |       |       |       |       |       |       |       |
| Candidatus Carsonella ruddii strain BT chromosome... | (36191) | 36191                                                                          | 36201 | 36212 | 36223 | 36234 | 36245 | 36256 | 36267 |
| Candidatus Carsonella 135557 - 167442nt              | (36191) | TAAACATTCTTCAGGTTTAATAATTCCGTCAGTTTCAATATCAAAAAATAAATTTTTTAATTTTTTTATTAAAAAAT  |       |       |       |       |       |       |       |
| SARS-CoV-2 Reference Genome NC_045512.2              | (1)     | -----                                                                          |       |       |       |       |       |       |       |
|                                                      | (1)     | -----                                                                          |       |       |       |       |       |       |       |
| Section 472                                          |         |                                                                                |       |       |       |       |       |       |       |
| Candidatus Carsonella ruddii strain BT chromosome... | (36268) | 36268                                                                          | 36278 | 36289 | 36300 | 36311 | 36322 | 36333 | 36344 |
| Candidatus Carsonella 135557 - 167442nt              | (36268) | TTTTTATGTATAAAATAATTTATGTTTTTTAAAGAAGACTTTAAAAAATTAATTTTAATAACTTTTGAATTAAAAAT  |       |       |       |       |       |       |       |
| SARS-CoV-2 Reference Genome NC_045512.2              | (1)     | -----                                                                          |       |       |       |       |       |       |       |
|                                                      | (1)     | -----                                                                          |       |       |       |       |       |       |       |
| Section 473                                          |         |                                                                                |       |       |       |       |       |       |       |
| Candidatus Carsonella ruddii strain BT chromosome... | (36345) | 36345                                                                          | 36355 | 36366 | 36377 | 36388 | 36399 | 36410 | 36421 |
| Candidatus Carsonella 135557 - 167442nt              | (36345) | TTTATTAATAATATTATTATTAGTAAATTATAACTAGTATTAATACATTTTCATTAAAAACAAAAAATTATATTAT   |       |       |       |       |       |       |       |
| SARS-CoV-2 Reference Genome NC_045512.2              | (1)     | -----                                                                          |       |       |       |       |       |       |       |
|                                                      | (1)     | -----                                                                          |       |       |       |       |       |       |       |
| Section 474                                          |         |                                                                                |       |       |       |       |       |       |       |
| Candidatus Carsonella ruddii strain BT chromosome... | (36422) | 36422                                                                          | 36432 | 36443 | 36454 | 36465 | 36476 | 36487 | 36498 |
| Candidatus Carsonella 135557 - 167442nt              | (36422) | CTGTTATATTTGCTATTATTATATCTGGATTATAAATAATAATATGTTTATCAGAAAAATATCTTTTGCTTTAACA   |       |       |       |       |       |       |       |
| SARS-CoV-2 Reference Genome NC_045512.2              | (1)     | -----                                                                          |       |       |       |       |       |       |       |
|                                                      | (1)     | -----                                                                          |       |       |       |       |       |       |       |

|                                                      |         |                                                                               |       |       |       |       |       |       |       |
|------------------------------------------------------|---------|-------------------------------------------------------------------------------|-------|-------|-------|-------|-------|-------|-------|
|                                                      |         | Section 475                                                                   |       |       |       |       |       |       |       |
| Candidatus Carsonella ruddii strain BT chromosome... | (36499) | 36499                                                                         | 36509 | 36520 | 36531 | 36542 | 36553 | 36564 | 36575 |
|                                                      | (36499) | ATACAAGGTCCTTTTTTTTTTATAATTAAAAAGCAGTTATTGAATTTTAAATTTTATTAAAAATATTATTTATATT  |       |       |       |       |       |       |       |
|                                                      | (1)     | -----                                                                         |       |       |       |       |       |       |       |
| Candidatus Carsonella 135557 - 167442nt              | (1)     | -----                                                                         |       |       |       |       |       |       |       |
| SARS-CoV-2 Reference Genome NC_045512.2              | (1)     | -----                                                                         |       |       |       |       |       |       |       |
|                                                      |         | Section 476                                                                   |       |       |       |       |       |       |       |
| Candidatus Carsonella ruddii strain BT chromosome... | (36576) | 36576                                                                         | 36586 | 36597 | 36608 | 36619 | 36630 | 36641 | 36652 |
|                                                      | (36576) | ATTAATAATTTTAAAGTATTTTCTTTTATACCTTTTATATTAGAAAAATTCAGAATTAATATTAAAAAATTTAACAT |       |       |       |       |       |       |       |
|                                                      | (1)     | -----                                                                         |       |       |       |       |       |       |       |
| Candidatus Carsonella 135557 - 167442nt              | (1)     | -----                                                                         |       |       |       |       |       |       |       |
| SARS-CoV-2 Reference Genome NC_045512.2              | (1)     | -----                                                                         |       |       |       |       |       |       |       |
|                                                      |         | Section 477                                                                   |       |       |       |       |       |       |       |
| Candidatus Carsonella ruddii strain BT chromosome... | (36653) | 36653                                                                         | 36663 | 36674 | 36685 | 36696 | 36707 | 36718 | 36729 |
|                                                      | (36653) | ATATTATTTTAAAACTAAAAGTTGTTAAAAAAATAGTTCTTCTTAAAAAATTTCTAAAGAATCACAATATGAATTA  |       |       |       |       |       |       |       |
|                                                      | (1)     | -----                                                                         |       |       |       |       |       |       |       |
| Candidatus Carsonella 135557 - 167442nt              | (1)     | -----                                                                         |       |       |       |       |       |       |       |
| SARS-CoV-2 Reference Genome NC_045512.2              | (1)     | -----                                                                         |       |       |       |       |       |       |       |
|                                                      |         | Section 478                                                                   |       |       |       |       |       |       |       |
| Candidatus Carsonella ruddii strain BT chromosome... | (36730) | 36730                                                                         | 36740 | 36751 | 36762 | 36773 | 36784 | 36795 | 36806 |
|                                                      | (36730) | TTAAAAGATTCAATTTTTATTAACTTCTAAAAAAGAAATTTTTTTAAAACTAATTTTATTAAAAAATAATTTT     |       |       |       |       |       |       |       |
|                                                      | (1)     | -----                                                                         |       |       |       |       |       |       |       |
| Candidatus Carsonella 135557 - 167442nt              | (1)     | -----                                                                         |       |       |       |       |       |       |       |
| SARS-CoV-2 Reference Genome NC_045512.2              | (1)     | -----                                                                         |       |       |       |       |       |       |       |
|                                                      |         | Section 479                                                                   |       |       |       |       |       |       |       |
| Candidatus Carsonella ruddii strain BT chromosome... | (36807) | 36807                                                                         | 36817 | 36828 | 36839 | 36850 | 36861 | 36872 | 36883 |
|                                                      | (36807) | TTTCTGAAAATTTATCATTTATAAATATCTAAATTTAAATTTTATTAATATTAAATTTAAAAATATTAGGAAGAAA  |       |       |       |       |       |       |       |
|                                                      | (1)     | -----                                                                         |       |       |       |       |       |       |       |
| Candidatus Carsonella 135557 - 167442nt              | (1)     | -----                                                                         |       |       |       |       |       |       |       |
| SARS-CoV-2 Reference Genome NC_045512.2              | (1)     | -----                                                                         |       |       |       |       |       |       |       |
|                                                      |         | Section 480                                                                   |       |       |       |       |       |       |       |
| Candidatus Carsonella ruddii strain BT chromosome... | (36884) | 36884                                                                         | 36894 | 36905 | 36916 | 36927 | 36938 | 36949 | 36960 |
|                                                      | (36884) | TAAAAAATTCCAAATCCATAAAAAATAATTTGTAAATAACCAATTTAAATTGAAAAATTTTACAATTATAATTAA   |       |       |       |       |       |       |       |
|                                                      | (1)     | -----                                                                         |       |       |       |       |       |       |       |
| Candidatus Carsonella 135557 - 167442nt              | (1)     | -----                                                                         |       |       |       |       |       |       |       |
| SARS-CoV-2 Reference Genome NC_045512.2              | (1)     | -----                                                                         |       |       |       |       |       |       |       |



## SARS-CoV-2 &amp; Bakterien.apr

|                                                      |         |                                                                                |       |       |       |       |       |       |       |
|------------------------------------------------------|---------|--------------------------------------------------------------------------------|-------|-------|-------|-------|-------|-------|-------|
|                                                      |         | Section 481                                                                    |       |       |       |       |       |       |       |
| Candidatus Carsonella ruddii strain BT chromosome... | (36961) | 36961                                                                          | 36971 | 36982 | 36993 | 37004 | 37015 | 37026 | 37037 |
|                                                      | (36961) | AATTTTCAAATAAAAAATTTTCAACATAAATTGAATCTCCAGGAGATAAAATAAAAGATGGAAATTTTATTTTTTTTA |       |       |       |       |       |       |       |
|                                                      | (1)     | -----                                                                          |       |       |       |       |       |       |       |
| Candidatus Carsonella 135557 - 167442nt              | (1)     | -----                                                                          |       |       |       |       |       |       |       |
| SARS-CoV-2 Reference Genome NC_045512.2              | (1)     | -----                                                                          |       |       |       |       |       |       |       |
|                                                      |         | Section 482                                                                    |       |       |       |       |       |       |       |
| Candidatus Carsonella ruddii strain BT chromosome... | (37038) | 37038                                                                          | 37048 | 37059 | 37070 | 37081 | 37092 | 37103 | 37114 |
|                                                      | (37038) | AAATTAACATATATAAAACCATGTAAAATTTTTGTCTAGAATTTTTCTAGAAATTGAAAAATTCATTCTATAAAC    |       |       |       |       |       |       |       |
|                                                      | (1)     | -----                                                                          |       |       |       |       |       |       |       |
| Candidatus Carsonella 135557 - 167442nt              | (1)     | -----                                                                          |       |       |       |       |       |       |       |
| SARS-CoV-2 Reference Genome NC_045512.2              | (1)     | -----                                                                          |       |       |       |       |       |       |       |
|                                                      |         | Section 483                                                                    |       |       |       |       |       |       |       |
| Candidatus Carsonella ruddii strain BT chromosome... | (37115) | 37115                                                                          | 37125 | 37136 | 37147 | 37158 | 37169 | 37180 | 37191 |
|                                                      | (37115) | AAGATTATCTAATCTTCTTTCTAAAAAATTTATTAAATCTTCACATAAAAAAATTTTTTTGATATTTTTTTATATA   |       |       |       |       |       |       |       |
|                                                      | (1)     | -----                                                                          |       |       |       |       |       |       |       |
| Candidatus Carsonella 135557 - 167442nt              | (1)     | -----                                                                          |       |       |       |       |       |       |       |
| SARS-CoV-2 Reference Genome NC_045512.2              | (1)     | -----                                                                          |       |       |       |       |       |       |       |
|                                                      |         | Section 484                                                                    |       |       |       |       |       |       |       |
| Candidatus Carsonella ruddii strain BT chromosome... | (37192) | 37192                                                                          | 37202 | 37213 | 37224 | 37235 | 37246 | 37257 | 37268 |
|                                                      | (37192) | TTAATTTAAATTTTTTTTTCAGAAATAATATAATATCTTTTAATTTTTTGTTTAATTCTTAAATTTATACCATAATAA |       |       |       |       |       |       |       |
|                                                      | (1)     | -----                                                                          |       |       |       |       |       |       |       |
| Candidatus Carsonella 135557 - 167442nt              | (1)     | -----                                                                          |       |       |       |       |       |       |       |
| SARS-CoV-2 Reference Genome NC_045512.2              | (1)     | -----                                                                          |       |       |       |       |       |       |       |
|                                                      |         | Section 485                                                                    |       |       |       |       |       |       |       |
| Candidatus Carsonella ruddii strain BT chromosome... | (37269) | 37269                                                                          | 37279 | 37290 | 37301 | 37312 | 37323 | 37334 | 37345 |
|                                                      | (37269) | GATAATTTATTTTGATCAACTCCATGTTCCACCAGGAGTTAATAATGATCTAGATTTAGAAAAAATTTTTTTCTGA   |       |       |       |       |       |       |       |
|                                                      | (1)     | -----                                                                          |       |       |       |       |       |       |       |
| Candidatus Carsonella 135557 - 167442nt              | (1)     | -----                                                                          |       |       |       |       |       |       |       |
| SARS-CoV-2 Reference Genome NC_045512.2              | (1)     | -----                                                                          |       |       |       |       |       |       |       |
|                                                      |         | Section 486                                                                    |       |       |       |       |       |       |       |
| Candidatus Carsonella ruddii strain BT chromosome... | (37346) | 37346                                                                          | 37356 | 37367 | 37378 | 37389 | 37400 | 37411 | 37422 |
|                                                      | (37346) | AAAAAATCTAAATTTTCTCCTTCTCTCTACATATTTTATTTCTTTTAATTTTCATTAAACTCTTCTTTTTTTTTT    |       |       |       |       |       |       |       |
|                                                      | (1)     | -----                                                                          |       |       |       |       |       |       |       |
| Candidatus Carsonella 135557 - 167442nt              | (1)     | -----                                                                          |       |       |       |       |       |       |       |
| SARS-CoV-2 Reference Genome NC_045512.2              | (1)     | -----                                                                          |       |       |       |       |       |       |       |

|                                                      |         |                                                                                |       |       |       |       |       |       |       |
|------------------------------------------------------|---------|--------------------------------------------------------------------------------|-------|-------|-------|-------|-------|-------|-------|
| Section 487                                          |         |                                                                                |       |       |       |       |       |       |       |
| Candidatus Carsonella ruddii strain BT chromosome... | (37423) | 37423                                                                          | 37433 | 37444 | 37455 | 37466 | 37477 | 37488 | 37499 |
| Candidatus Carsonella 135557 - 167442nt              | (37423) | TTTTCTACAACCATTATAAGGTAATGGAGTAATATCTGTTATACTCCTTATATAAAATTCACAAATTATTTATTATTC |       |       |       |       |       |       |       |
| SARS-CoV-2 Reference Genome NC_045512.2              | (1)     | -----                                                                          |       |       |       |       |       |       |       |
|                                                      | (1)     | -----                                                                          |       |       |       |       |       |       |       |
| Section 488                                          |         |                                                                                |       |       |       |       |       |       |       |
| Candidatus Carsonella ruddii strain BT chromosome... | (37500) | 37500                                                                          | 37510 | 37521 | 37532 | 37543 | 37554 | 37565 | 37576 |
| Candidatus Carsonella 135557 - 167442nt              | (37500) | TTAATATTGTTTCTTTTCCAATGCTTATTCCTTTTATATATATATCAACAATTTTATATTTTTTTTATAAGCAAGT   |       |       |       |       |       |       |       |
| SARS-CoV-2 Reference Genome NC_045512.2              | (1)     | -----                                                                          |       |       |       |       |       |       |       |
|                                                      | (1)     | -----                                                                          |       |       |       |       |       |       |       |
| Section 489                                          |         |                                                                                |       |       |       |       |       |       |       |
| Candidatus Carsonella ruddii strain BT chromosome... | (37577) | 37577                                                                          | 37587 | 37598 | 37609 | 37620 | 37631 | 37642 | 37653 |
| Candidatus Carsonella 135557 - 167442nt              | (37577) | ATAGATATTTTTTCACTTATTGATTGAGATGCTAAAGATGTACTTTTTTTAGGACCTTTAAACCTAAACACCTGA    |       |       |       |       |       |       |       |
| SARS-CoV-2 Reference Genome NC_045512.2              | (1)     | -----                                                                          |       |       |       |       |       |       |       |
|                                                      | (1)     | -----                                                                          |       |       |       |       |       |       |       |
| Section 490                                          |         |                                                                                |       |       |       |       |       |       |       |
| Candidatus Carsonella ruddii strain BT chromosome... | (37654) | 37654                                                                          | 37664 | 37675 | 37686 | 37697 | 37708 | 37719 | 37730 |
| Candidatus Carsonella 135557 - 167442nt              | (37654) | TGAAAACCAACCTATTGTATTTCTTTTAAATCAGTTAAAGTAGAAACAGTATTATTAAAAAGTTGAATTAATATATA  |       |       |       |       |       |       |       |
| SARS-CoV-2 Reference Genome NC_045512.2              | (1)     | -----                                                                          |       |       |       |       |       |       |       |
|                                                      | (1)     | -----                                                                          |       |       |       |       |       |       |       |
| Section 491                                          |         |                                                                                |       |       |       |       |       |       |       |
| Candidatus Carsonella ruddii strain BT chromosome... | (37731) | 37731                                                                          | 37741 | 37752 | 37763 | 37774 | 37785 | 37796 | 37807 |
| Candidatus Carsonella 135557 - 167442nt              | (37731) | TTATTCCATAAATTATAATCATATATTTTCATGATTCATTTTTTTTCTAGTTTTTGCATTTGTTTTGTTCTTTGTCC  |       |       |       |       |       |       |       |
| SARS-CoV-2 Reference Genome NC_045512.2              | (1)     | -----                                                                          |       |       |       |       |       |       |       |
|                                                      | (1)     | -----                                                                          |       |       |       |       |       |       |       |
| Section 492                                          |         |                                                                                |       |       |       |       |       |       |       |
| Candidatus Carsonella ruddii strain BT chromosome... | (37808) | 37808                                                                          | 37818 | 37829 | 37840 | 37851 | 37862 | 37873 | 37884 |
| Candidatus Carsonella 135557 - 167442nt              | (37808) | TCTGCAAGGTAATTTGTTTTTATGTCTTAAACTTTTAAACTATTTAAGTTTAAATATTCTTTTAAGATTTTCTTTTA  |       |       |       |       |       |       |       |
| SARS-CoV-2 Reference Genome NC_045512.2              | (1)     | -----                                                                          |       |       |       |       |       |       |       |
|                                                      | (1)     | -----                                                                          |       |       |       |       |       |       |       |

## SARS-CoV-2 &amp; Bakterien.apr

|                                                      |         |                                                                               |       |       |       |       |       |       |       |
|------------------------------------------------------|---------|-------------------------------------------------------------------------------|-------|-------|-------|-------|-------|-------|-------|
|                                                      |         | Section 493                                                                   |       |       |       |       |       |       |       |
| Candidatus Carsonella ruddii strain BT chromosome... | (37885) | 37885                                                                         | 37895 | 37906 | 37917 | 37928 | 37939 | 37950 | 37961 |
|                                                      | (37885) | TTAACATTTTTAAATCATTTTCTATTGTTAATGTTCTTATAGTATTTATCAATTTTGTTCATATTCATTTAAT     |       |       |       |       |       |       |       |
|                                                      | (1)     | -----                                                                         |       |       |       |       |       |       |       |
| Candidatus Carsonella 135557 - 167442nt              | (1)     | -----                                                                         |       |       |       |       |       |       |       |
| SARS-CoV-2 Reference Genome NC_045512.2              | (1)     | -----                                                                         |       |       |       |       |       |       |       |
|                                                      |         | Section 494                                                                   |       |       |       |       |       |       |       |
| Candidatus Carsonella ruddii strain BT chromosome... | (37962) | 37962                                                                         | 37972 | 37983 | 37994 | 38005 | 38016 | 38027 | 38038 |
|                                                      | (37962) | TTTATTAATTTTTGTTTTGAATATTTAATTTTTTACAAATTTTATAGAAGTTTTTATACCTATTCCAAAAATTTT   |       |       |       |       |       |       |       |
|                                                      | (1)     | -----                                                                         |       |       |       |       |       |       |       |
| Candidatus Carsonella 135557 - 167442nt              | (1)     | -----                                                                         |       |       |       |       |       |       |       |
| SARS-CoV-2 Reference Genome NC_045512.2              | (1)     | -----                                                                         |       |       |       |       |       |       |       |
|                                                      |         | Section 495                                                                   |       |       |       |       |       |       |       |
| Candidatus Carsonella ruddii strain BT chromosome... | (38039) | 38039                                                                         | 38049 | 38060 | 38071 | 38082 | 38093 | 38104 | 38115 |
|                                                      | (38039) | AGTTATACTAAAAGTAACGTTTTTGTAAGCTTGAATATTTACACCACAAATATTAATTTTCATAATTGTCTTTGTTT |       |       |       |       |       |       |       |
|                                                      | (1)     | -----                                                                         |       |       |       |       |       |       |       |
| Candidatus Carsonella 135557 - 167442nt              | (1)     | -----                                                                         |       |       |       |       |       |       |       |
| SARS-CoV-2 Reference Genome NC_045512.2              | (1)     | -----                                                                         |       |       |       |       |       |       |       |
|                                                      |         | Section 496                                                                   |       |       |       |       |       |       |       |
| Candidatus Carsonella ruddii strain BT chromosome... | (38116) | 38116                                                                         | 38126 | 38137 | 38148 | 38159 | 38170 | 38181 | 38192 |
|                                                      | (38116) | ATGTTTTTTTAAATAACATATAACGAAAAAATTTTTTTCTTTTTATTATTATACATTTACTACATATTTTTTTAA   |       |       |       |       |       |       |       |
|                                                      | (1)     | -----                                                                         |       |       |       |       |       |       |       |
| Candidatus Carsonella 135557 - 167442nt              | (1)     | -----                                                                         |       |       |       |       |       |       |       |
| SARS-CoV-2 Reference Genome NC_045512.2              | (1)     | -----                                                                         |       |       |       |       |       |       |       |
|                                                      |         | Section 497                                                                   |       |       |       |       |       |       |       |
| Candidatus Carsonella ruddii strain BT chromosome... | (38193) | 38193                                                                         | 38203 | 38214 | 38225 | 38236 | 38247 | 38258 | 38269 |
|                                                      | (38193) | TTGAATTTTTAACTTTTCATATAAAAAAATAATTTTTTTTTATTTTTTTATTTCTTATTTTTTGTTTAAATTTTGG  |       |       |       |       |       |       |       |
|                                                      | (1)     | -----                                                                         |       |       |       |       |       |       |       |
| Candidatus Carsonella 135557 - 167442nt              | (1)     | -----                                                                         |       |       |       |       |       |       |       |
| SARS-CoV-2 Reference Genome NC_045512.2              | (1)     | -----                                                                         |       |       |       |       |       |       |       |
|                                                      |         | Section 498                                                                   |       |       |       |       |       |       |       |
| Candidatus Carsonella ruddii strain BT chromosome... | (38270) | 38270                                                                         | 38280 | 38291 | 38302 | 38313 | 38324 | 38335 | 38346 |
|                                                      | (38270) | TTTTCTTTTAAATATATTTGTTTGACCTCCTTCAAATAATTTAGGAATATTGTATCCTGATCTTGATTTTTGTCCTT |       |       |       |       |       |       |       |
|                                                      | (1)     | -----                                                                         |       |       |       |       |       |       |       |
| Candidatus Carsonella 135557 - 167442nt              | (1)     | -----                                                                         |       |       |       |       |       |       |       |
| SARS-CoV-2 Reference Genome NC_045512.2              | (1)     | -----                                                                         |       |       |       |       |       |       |       |

## SARS-CoV-2 &amp; Bakterien.apr

|                                                      |         |                                                                                |       |       |       |       |       |       |       |
|------------------------------------------------------|---------|--------------------------------------------------------------------------------|-------|-------|-------|-------|-------|-------|-------|
| Section 499                                          |         |                                                                                |       |       |       |       |       |       |       |
| Candidatus Carsonella ruddii strain BT chromosome... | (38347) | 38347                                                                          | 38357 | 38368 | 38379 | 38390 | 38401 | 38412 | 38423 |
| Candidatus Carsonella 135557 - 167442nt              | (38347) | TATGTCCTCTGCCACATGTTTTACCTTTTCCAGAAGAAAAACCTCTTCCAATTCTTTTTTTTTTTGTATTAAAAATA  |       |       |       |       |       |       |       |
| SARS-CoV-2 Reference Genome NC_045512.2              | (1)     | -----                                                                          |       |       |       |       |       |       |       |
|                                                      | (1)     | -----                                                                          |       |       |       |       |       |       |       |
| Section 500                                          |         |                                                                                |       |       |       |       |       |       |       |
| Candidatus Carsonella ruddii strain BT chromosome... | (38424) | 38424                                                                          | 38434 | 38445 | 38456 | 38467 | 38478 | 38489 | 38500 |
| Candidatus Carsonella 135557 - 167442nt              | (38424) | TTAAAAATTTTCGATAATCATTATTTTAAAAATGTTAATGCTTTAATTGTACAAATTGTTACATTAATTGTATTTGAA |       |       |       |       |       |       |       |
| SARS-CoV-2 Reference Genome NC_045512.2              | (1)     | -----                                                                          |       |       |       |       |       |       |       |
|                                                      | (1)     | -----                                                                          |       |       |       |       |       |       |       |
| Section 501                                          |         |                                                                                |       |       |       |       |       |       |       |
| Candidatus Carsonella ruddii strain BT chromosome... | (38501) | 38501                                                                          | 38511 | 38522 | 38533 | 38544 | 38555 | 38566 | 38577 |
| Candidatus Carsonella 135557 - 167442nt              | (38501) | GAACCATGAATTTTTGAAAAACACTTTTAATACCAGCAGAAATTAAAACTTGTTTTACAACATTACTACAAATTAA   |       |       |       |       |       |       |       |
| SARS-CoV-2 Reference Genome NC_045512.2              | (1)     | -----                                                                          |       |       |       |       |       |       |       |
|                                                      | (1)     | -----                                                                          |       |       |       |       |       |       |       |
| Section 502                                          |         |                                                                                |       |       |       |       |       |       |       |
| Candidatus Carsonella ruddii strain BT chromosome... | (38578) | 38578                                                                          | 38588 | 38599 | 38610 | 38621 | 38632 | 38643 | 38654 |
| Candidatus Carsonella 135557 - 167442nt              | (38578) | ACCAATTATTTTTGATGCAGGAAACAAATATATTTTTGTTGCAGAATGTTTAGCATATAAAAAATGAGGAATTGAAT  |       |       |       |       |       |       |       |
| SARS-CoV-2 Reference Genome NC_045512.2              | (1)     | -----                                                                          |       |       |       |       |       |       |       |
|                                                      | (1)     | -----                                                                          |       |       |       |       |       |       |       |
| Section 503                                          |         |                                                                                |       |       |       |       |       |       |       |
| Candidatus Carsonella ruddii strain BT chromosome... | (38655) | 38655                                                                          | 38665 | 38676 | 38687 | 38698 | 38709 | 38720 | 38731 |
| Candidatus Carsonella 135557 - 167442nt              | (38655) | TATTTAATATATTTAATTTTATAATATTATTTCTAGCTTTTAAATATGATTTTTTTATAGATTCTAAAATTTCTCTT  |       |       |       |       |       |       |       |
| SARS-CoV-2 Reference Genome NC_045512.2              | (1)     | -----                                                                          |       |       |       |       |       |       |       |
|                                                      | (1)     | -----                                                                          |       |       |       |       |       |       |       |
| Section 504                                          |         |                                                                                |       |       |       |       |       |       |       |
| Candidatus Carsonella ruddii strain BT chromosome... | (38732) | 38732                                                                          | 38742 | 38753 | 38764 | 38775 | 38786 | 38797 | 38808 |
| Candidatus Carsonella 135557 - 167442nt              | (38732) | GATTTACCTCTTCCAATCCAATTAAATAATTTTTATTTCCACAAATAGATGTAGACGTATAAGAAAAAATTCTTCC   |       |       |       |       |       |       |       |
| SARS-CoV-2 Reference Genome NC_045512.2              | (1)     | -----                                                                          |       |       |       |       |       |       |       |
|                                                      | (1)     | -----                                                                          |       |       |       |       |       |       |       |

## SARS-CoV-2 &amp; Bakterien.apr

|                                                      |         |                                                                                  |       |       |       |       |       |       |       |
|------------------------------------------------------|---------|----------------------------------------------------------------------------------|-------|-------|-------|-------|-------|-------|-------|
| Section 505                                          |         |                                                                                  |       |       |       |       |       |       |       |
| Candidatus Carsonella ruddii strain BT chromosome... | (38809) | 38809                                                                            | 38819 | 38830 | 38841 | 38852 | 38863 | 38874 | 38885 |
| Candidatus Carsonella 135557 - 167442nt              | (38809) | TCCTTTAACTACTTTTGTAACCTCTATGAATTTTAACCAATCTGTCTTCCATTTTTATTATTAAATAAAATTTATTATT  |       |       |       |       |       |       |       |
| SARS-CoV-2 Reference Genome NC_045512.2              | (1)     | -----                                                                            |       |       |       |       |       |       |       |
|                                                      | (1)     | -----                                                                            |       |       |       |       |       |       |       |
| Section 506                                          |         |                                                                                  |       |       |       |       |       |       |       |
| Candidatus Carsonella ruddii strain BT chromosome... | (38886) | 38886                                                                            | 38896 | 38907 | 38918 | 38929 | 38940 | 38951 | 38962 |
| Candidatus Carsonella 135557 - 167442nt              | (38886) | TTTTTATAATATCCATTATAATTTTTTTTTATTATATAAAAAATTTTCTTATTAAAAATAATATTATTTTTTTAATTTT  |       |       |       |       |       |       |       |
| SARS-CoV-2 Reference Genome NC_045512.2              | (1)     | -----                                                                            |       |       |       |       |       |       |       |
|                                                      | (1)     | -----                                                                            |       |       |       |       |       |       |       |
| Section 507                                          |         |                                                                                  |       |       |       |       |       |       |       |
| Candidatus Carsonella ruddii strain BT chromosome... | (38963) | 38963                                                                            | 38973 | 38984 | 38995 | 39006 | 39017 | 39028 | 39039 |
| Candidatus Carsonella 135557 - 167442nt              | (38963) | TTCAAATAAAAAATAAAAAATTTTTTTTTTATTTTTTTATAAAATAAATATTTTTATTATTATAAAATAAATAAATTA   |       |       |       |       |       |       |       |
| SARS-CoV-2 Reference Genome NC_045512.2              | (1)     | -----                                                                            |       |       |       |       |       |       |       |
|                                                      | (1)     | -----                                                                            |       |       |       |       |       |       |       |
| Section 508                                          |         |                                                                                  |       |       |       |       |       |       |       |
| Candidatus Carsonella ruddii strain BT chromosome... | (39040) | 39040                                                                            | 39050 | 39061 | 39072 | 39083 | 39094 | 39105 | 39116 |
| Candidatus Carsonella 135557 - 167442nt              | (39040) | AAAAATTTTTTATTTGTTTTTTTTTAAAAATTATTTTCATTGTTTTTTTTTTGAAGATTTTTTTAAATTTGGATTTTCTA |       |       |       |       |       |       |       |
| SARS-CoV-2 Reference Genome NC_045512.2              | (1)     | -----                                                                            |       |       |       |       |       |       |       |
|                                                      | (1)     | -----                                                                            |       |       |       |       |       |       |       |
| Section 509                                          |         |                                                                                  |       |       |       |       |       |       |       |
| Candidatus Carsonella ruddii strain BT chromosome... | (39117) | 39117                                                                            | 39127 | 39138 | 39149 | 39160 | 39171 | 39182 | 39193 |
| Candidatus Carsonella 135557 - 167442nt              | (39117) | AAAACATTCCTTTTTTTTTATATGGATTAAATTTTTTTATTTTAAATAATTTATTTACAAAAATACCAATTTTATCT    |       |       |       |       |       |       |       |
| SARS-CoV-2 Reference Genome NC_045512.2              | (1)     | -----                                                                            |       |       |       |       |       |       |       |
|                                                      | (1)     | -----                                                                            |       |       |       |       |       |       |       |
| Section 510                                          |         |                                                                                  |       |       |       |       |       |       |       |
| Candidatus Carsonella ruddii strain BT chromosome... | (39194) | 39194                                                                            | 39204 | 39215 | 39226 | 39237 | 39248 | 39259 | 39270 |
| Candidatus Carsonella 135557 - 167442nt              | (39194) | TTAAAAACAGATTTTAAACAATTTTTTCTTTAAAAATTTCAATAGTAATATAATTTGGAATTACTAAAATTTTGA      |       |       |       |       |       |       |       |
| SARS-CoV-2 Reference Genome NC_045512.2              | (1)     | -----                                                                            |       |       |       |       |       |       |       |
|                                                      | (1)     | -----                                                                            |       |       |       |       |       |       |       |

|                                                      |         |                                                                                   |       |       |       |       |       |       |       |
|------------------------------------------------------|---------|-----------------------------------------------------------------------------------|-------|-------|-------|-------|-------|-------|-------|
|                                                      |         | Section 511                                                                       |       |       |       |       |       |       |       |
| Candidatus Carsonella ruddii strain BT chromosome... | (39271) | 39271                                                                             | 39281 | 39292 | 39303 | 39314 | 39325 | 39336 | 39347 |
|                                                      | (39271) | ATCAGAAAAACCTAAATTTAAATAAATTTTCATTTTTTTTAAATAAAAAATTTTATATCCAATTCCTGAAAAAAAAAATTG |       |       |       |       |       |       |       |
|                                                      | (1)     | -----                                                                             |       |       |       |       |       |       |       |
| Candidatus Carsonella 135557 - 167442nt              | (1)     | -----                                                                             |       |       |       |       |       |       |       |
| SARS-CoV-2 Reference Genome NC_045512.2              | (1)     | -----                                                                             |       |       |       |       |       |       |       |
|                                                      |         | Section 512                                                                       |       |       |       |       |       |       |       |
| Candidatus Carsonella ruddii strain BT chromosome... | (39348) | 39348                                                                             | 39358 | 39369 | 39380 | 39391 | 39402 | 39413 | 39424 |
|                                                      | (39348) | TTTTTTGCCATAAATTATTTTATACCAATTAATAAATTTTTTATTGTTTTTAAAAAAGAAATTTTCATTTTTTTTTTTTA  |       |       |       |       |       |       |       |
|                                                      | (1)     | -----                                                                             |       |       |       |       |       |       |       |
| Candidatus Carsonella 135557 - 167442nt              | (1)     | -----                                                                             |       |       |       |       |       |       |       |
| SARS-CoV-2 Reference Genome NC_045512.2              | (1)     | -----                                                                             |       |       |       |       |       |       |       |
|                                                      |         | Section 513                                                                       |       |       |       |       |       |       |       |
| Candidatus Carsonella ruddii strain BT chromosome... | (39425) | 39425                                                                             | 39435 | 39446 | 39457 | 39468 | 39479 | 39490 | 39501 |
|                                                      | (39425) | AAACTTATTGATGATAAAAAAATATTATTTTCTTTTAAATTTAAATTTATATCATTTGGTATTTTTATTTTTTCCAAA    |       |       |       |       |       |       |       |
|                                                      | (1)     | -----                                                                             |       |       |       |       |       |       |       |
| Candidatus Carsonella 135557 - 167442nt              | (1)     | -----                                                                             |       |       |       |       |       |       |       |
| SARS-CoV-2 Reference Genome NC_045512.2              | (1)     | -----                                                                             |       |       |       |       |       |       |       |
|                                                      |         | Section 514                                                                       |       |       |       |       |       |       |       |
| Candidatus Carsonella ruddii strain BT chromosome... | (39502) | 39502                                                                             | 39512 | 39523 | 39534 | 39545 | 39556 | 39567 | 39578 |
|                                                      | (39502) | ATATTTATTTTTTAACAAATAAAAAACCATTTTAAATTTAAACTTTTTCTTTTAAATTTATATTTTTCATAAAATTAA    |       |       |       |       |       |       |       |
|                                                      | (1)     | -----                                                                             |       |       |       |       |       |       |       |
| Candidatus Carsonella 135557 - 167442nt              | (1)     | -----                                                                             |       |       |       |       |       |       |       |
| SARS-CoV-2 Reference Genome NC_045512.2              | (1)     | -----                                                                             |       |       |       |       |       |       |       |
|                                                      |         | Section 515                                                                       |       |       |       |       |       |       |       |
| Candidatus Carsonella ruddii strain BT chromosome... | (39579) | 39579                                                                             | 39589 | 39600 | 39611 | 39622 | 39633 | 39644 | 39655 |
|                                                      | (39579) | AACAAATTAATAAACCACTTATTCCAATTTGTTTACATTCTTTTAAAGTTAATAAACCTAAATTTGTATTAATTATAC    |       |       |       |       |       |       |       |
|                                                      | (1)     | -----                                                                             |       |       |       |       |       |       |       |
| Candidatus Carsonella 135557 - 167442nt              | (1)     | -----                                                                             |       |       |       |       |       |       |       |
| SARS-CoV-2 Reference Genome NC_045512.2              | (1)     | -----                                                                             |       |       |       |       |       |       |       |
|                                                      |         | Section 516                                                                       |       |       |       |       |       |       |       |
| Candidatus Carsonella ruddii strain BT chromosome... | (39656) | 39656                                                                             | 39666 | 39677 | 39688 | 39699 | 39710 | 39721 | 39732 |
|                                                      | (39656) | ATAAAGTTGATTTTAATAAAAAATTATTTATTTTTTTTATTTTAAATTTGAAATTTTTCTTGAAGGTTTAGAAAAAAT    |       |       |       |       |       |       |       |
|                                                      | (1)     | -----                                                                             |       |       |       |       |       |       |       |
| Candidatus Carsonella 135557 - 167442nt              | (1)     | -----                                                                             |       |       |       |       |       |       |       |
| SARS-CoV-2 Reference Genome NC_045512.2              | (1)     | -----                                                                             |       |       |       |       |       |       |       |

## SARS-CoV-2 &amp; Bakterien.apr

|                                                      |         |                                                                                |       |       |       |       |       |       |       |
|------------------------------------------------------|---------|--------------------------------------------------------------------------------|-------|-------|-------|-------|-------|-------|-------|
|                                                      |         | Section 517                                                                    |       |       |       |       |       |       |       |
| Candidatus Carsonella ruddii strain BT chromosome... | (39733) | 39733                                                                          | 39743 | 39754 | 39765 | 39776 | 39787 | 39798 | 39809 |
|                                                      | (39733) | TTAATATAATAAATGTTTTTCACAAAAACAAC TATA TATTTTTTTTTTTTAAATTATTAAAAAAATAATTTTCAAT |       |       |       |       |       |       |       |
|                                                      | (1)     | -----                                                                          |       |       |       |       |       |       |       |
| Candidatus Carsonella 135557 - 167442nt              | (1)     | -----                                                                          |       |       |       |       |       |       |       |
| SARS-CoV-2 Reference Genome NC_045512.2              | (1)     | -----                                                                          |       |       |       |       |       |       |       |
|                                                      |         | Section 518                                                                    |       |       |       |       |       |       |       |
| Candidatus Carsonella ruddii strain BT chromosome... | (39810) | 39810                                                                          | 39820 | 39831 | 39842 | 39853 | 39864 | 39875 | 39886 |
|                                                      | (39810) | AAAATTATATTCTAAAAATATTTCAAATATTAACATAGTAAATTAGAATAATTACAAAACTTATTTTTTTACCAG    |       |       |       |       |       |       |       |
|                                                      | (1)     | -----                                                                          |       |       |       |       |       |       |       |
| Candidatus Carsonella 135557 - 167442nt              | (1)     | -----                                                                          |       |       |       |       |       |       |       |
| SARS-CoV-2 Reference Genome NC_045512.2              | (1)     | -----                                                                          |       |       |       |       |       |       |       |
|                                                      |         | Section 519                                                                    |       |       |       |       |       |       |       |
| Candidatus Carsonella ruddii strain BT chromosome... | (39887) | 39887                                                                          | 39897 | 39908 | 39919 | 39930 | 39941 | 39952 | 39963 |
|                                                      | (39887) | AATTATAAGAATTAAAAATTCATTTTACTATCAAAATAATTTTTCATTACCAACTAGATTTTCTAAACCTACAA     |       |       |       |       |       |       |       |
|                                                      | (1)     | -----                                                                          |       |       |       |       |       |       |       |
| Candidatus Carsonella 135557 - 167442nt              | (1)     | -----                                                                          |       |       |       |       |       |       |       |
| SARS-CoV-2 Reference Genome NC_045512.2              | (1)     | -----                                                                          |       |       |       |       |       |       |       |
|                                                      |         | Section 520                                                                    |       |       |       |       |       |       |       |
| Candidatus Carsonella ruddii strain BT chromosome... | (39964) | 39964                                                                          | 39974 | 39985 | 39996 | 40007 | 40018 | 40029 | 40040 |
|                                                      | (39964) | TATTTCCATATCCGCCTATTTTCTTATTAAATTTCTATTTAAATAAAATTTACTATAAACACTTCTGTTTCTACCA   |       |       |       |       |       |       |       |
|                                                      | (1)     | -----                                                                          |       |       |       |       |       |       |       |
| Candidatus Carsonella 135557 - 167442nt              | (1)     | -----                                                                          |       |       |       |       |       |       |       |
| SARS-CoV-2 Reference Genome NC_045512.2              | (1)     | -----                                                                          |       |       |       |       |       |       |       |
|                                                      |         | Section 521                                                                    |       |       |       |       |       |       |       |
| Candidatus Carsonella ruddii strain BT chromosome... | (40041) | 40041                                                                          | 40051 | 40062 | 40073 | 40084 | 40095 | 40106 | 40117 |
|                                                      | (40041) | CTTATGTAACATCTTTTTTTAAATTTAACAATAATTTTTTTTTTTTAAATTAATAATTTAAATAATTTTCTAA      |       |       |       |       |       |       |       |
|                                                      | (1)     | -----                                                                          |       |       |       |       |       |       |       |
| Candidatus Carsonella 135557 - 167442nt              | (1)     | -----                                                                          |       |       |       |       |       |       |       |
| SARS-CoV-2 Reference Genome NC_045512.2              | (1)     | -----                                                                          |       |       |       |       |       |       |       |
|                                                      |         | Section 522                                                                    |       |       |       |       |       |       |       |
| Candidatus Carsonella ruddii strain BT chromosome... | (40118) | 40118                                                                          | 40128 | 40139 | 40150 | 40161 | 40172 | 40183 | 40194 |
|                                                      | (40118) | AGAAGAATTTAAAAATAAATTTTGTTTTATTTTTATAATTTTTTAATATTAAATAAACTTTTCTTATAAATTATAA   |       |       |       |       |       |       |       |
|                                                      | (1)     | -----                                                                          |       |       |       |       |       |       |       |
| Candidatus Carsonella 135557 - 167442nt              | (1)     | -----                                                                          |       |       |       |       |       |       |       |
| SARS-CoV-2 Reference Genome NC_045512.2              | (1)     | -----                                                                          |       |       |       |       |       |       |       |

## SARS-CoV-2 &amp; Bakterien.apr

|                                                      |         |                                                                                   |       |       |       |       |       |       |       |
|------------------------------------------------------|---------|-----------------------------------------------------------------------------------|-------|-------|-------|-------|-------|-------|-------|
|                                                      |         | Section 523                                                                       |       |       |       |       |       |       |       |
| Candidatus Carsonella ruddii strain BT chromosome... | (40195) | 40195                                                                             | 40205 | 40216 | 40227 | 40238 | 40249 | 40260 | 40271 |
|                                                      | (40195) | TATTTTTTAAAAATCAAACCTTTTTTTTGCCATTTTATTTTATAGGAAAAATTAATTATTTTATAAAAAATTTTAAAAATT |       |       |       |       |       |       |       |
|                                                      | (1)     | -----                                                                             |       |       |       |       |       |       |       |
| Candidatus Carsonella 135557 - 167442nt              | (1)     | -----                                                                             |       |       |       |       |       |       |       |
| SARS-CoV-2 Reference Genome NC_045512.2              | (1)     | -----                                                                             |       |       |       |       |       |       |       |
|                                                      |         | Section 524                                                                       |       |       |       |       |       |       |       |
| Candidatus Carsonella ruddii strain BT chromosome... | (40272) | 40272                                                                             | 40282 | 40293 | 40304 | 40315 | 40326 | 40337 | 40348 |
|                                                      | (40272) | GTTTTTTAAATTTTAAACAATAATACTAATATTAAAAACCAATATTAAATTCTTTATAAAAAATCAGGAAAAACTGATA   |       |       |       |       |       |       |       |
|                                                      | (1)     | -----                                                                             |       |       |       |       |       |       |       |
| Candidatus Carsonella 135557 - 167442nt              | (1)     | -----                                                                             |       |       |       |       |       |       |       |
| SARS-CoV-2 Reference Genome NC_045512.2              | (1)     | -----                                                                             |       |       |       |       |       |       |       |
|                                                      |         | Section 525                                                                       |       |       |       |       |       |       |       |
| Candidatus Carsonella ruddii strain BT chromosome... | (40349) | 40349                                                                             | 40359 | 40370 | 40381 | 40392 | 40403 | 40414 | 40425 |
|                                                      | (40349) | TATCAGTTATACCAAATGAATATTACCAAATCTATCAATTGATGTTTCATTTATTCCTTTAAATTCTTTTATTCTT      |       |       |       |       |       |       |       |
|                                                      | (1)     | -----                                                                             |       |       |       |       |       |       |       |
| Candidatus Carsonella 135557 - 167442nt              | (1)     | -----                                                                             |       |       |       |       |       |       |       |
| SARS-CoV-2 Reference Genome NC_045512.2              | (1)     | -----                                                                             |       |       |       |       |       |       |       |
|                                                      |         | Section 526                                                                       |       |       |       |       |       |       |       |
| Candidatus Carsonella ruddii strain BT chromosome... | (40426) | 40426                                                                             | 40436 | 40447 | 40458 | 40469 | 40480 | 40491 | 40502 |
|                                                      | (40426) | GGTATAACAACACAAATTAATTTATGATAAAATTCCACATTTTATTTTCTTAATGTTGTATAAACTCCAGCAAT        |       |       |       |       |       |       |       |
|                                                      | (1)     | -----                                                                             |       |       |       |       |       |       |       |
| Candidatus Carsonella 135557 - 167442nt              | (1)     | -----                                                                             |       |       |       |       |       |       |       |
| SARS-CoV-2 Reference Genome NC_045512.2              | (1)     | -----                                                                             |       |       |       |       |       |       |       |
|                                                      |         | Section 527                                                                       |       |       |       |       |       |       |       |
| Candidatus Carsonella ruddii strain BT chromosome... | (40503) | 40503                                                                             | 40513 | 40524 | 40535 | 40546 | 40557 | 40568 | 40579 |
|                                                      | (40503) | TTCACCAATCTTAGATTTAAATTTAGAAATAGATTTTAAATTTTAGAAAAAACTGGTTTTTGTCCAGATATATATT      |       |       |       |       |       |       |       |
|                                                      | (1)     | -----                                                                             |       |       |       |       |       |       |       |
| Candidatus Carsonella 135557 - 167442nt              | (1)     | -----                                                                             |       |       |       |       |       |       |       |
| SARS-CoV-2 Reference Genome NC_045512.2              | (1)     | -----                                                                             |       |       |       |       |       |       |       |
|                                                      |         | Section 528                                                                       |       |       |       |       |       |       |       |
| Candidatus Carsonella ruddii strain BT chromosome... | (40580) | 40580                                                                             | 40590 | 40601 | 40612 | 40623 | 40634 | 40645 | 40656 |
|                                                      | (40580) | CTATAGAATCAAAAACATTTTAAATAAATATTTTATCTTTATTGTTTTTGTACACCAGAATGTATTATTATTTT        |       |       |       |       |       |       |       |
|                                                      | (1)     | -----                                                                             |       |       |       |       |       |       |       |
| Candidatus Carsonella 135557 - 167442nt              | (1)     | -----                                                                             |       |       |       |       |       |       |       |
| SARS-CoV-2 Reference Genome NC_045512.2              | (1)     | -----                                                                             |       |       |       |       |       |       |       |



|                                                      |         |                                                                                  |       |       |       |       |       |       |       |
|------------------------------------------------------|---------|----------------------------------------------------------------------------------|-------|-------|-------|-------|-------|-------|-------|
| Section 529                                          |         |                                                                                  |       |       |       |       |       |       |       |
| Candidatus Carsonella ruddii strain BT chromosome... | (40657) | 40657                                                                            | 40667 | 40678 | 40689 | 40700 | 40711 | 40722 | 40733 |
| Candidatus Carsonella 135557 - 167442nt              | (40657) | TCTAATTTTATATTATAAAATTTTGTGTTTTTAAAGAAAATTCTTCTATTTTAAATTTATATAAAATTCATACTAATTCA |       |       |       |       |       |       |       |
| SARS-CoV-2 Reference Genome NC_045512.2              | (1)     | -----                                                                            |       |       |       |       |       |       |       |
|                                                      | (1)     | -----                                                                            |       |       |       |       |       |       |       |
| Section 530                                          |         |                                                                                  |       |       |       |       |       |       |       |
| Candidatus Carsonella ruddii strain BT chromosome... | (40734) | 40734                                                                            | 40744 | 40755 | 40766 | 40777 | 40788 | 40799 | 40810 |
| Candidatus Carsonella 135557 - 167442nt              | (40734) | TTTGATAATGATAATAATTTTTTAAATGAAAAATTTAATTTCTCTAGCTAAACAACCGAAAACACGCGTTCCAAT      |       |       |       |       |       |       |       |
| SARS-CoV-2 Reference Genome NC_045512.2              | (1)     | -----                                                                            |       |       |       |       |       |       |       |
|                                                      | (1)     | -----                                                                            |       |       |       |       |       |       |       |
| Section 531                                          |         |                                                                                  |       |       |       |       |       |       |       |
| Candidatus Carsonella ruddii strain BT chromosome... | (40811) | 40811                                                                            | 40821 | 40832 | 40843 | 40854 | 40865 | 40876 | 40887 |
| Candidatus Carsonella 135557 - 167442nt              | (40811) | CATTTGTTTATTATTATTTAATAATAGAACCGCATTATCACTAAAACGTAAATAAGTACCATCTTGTCTTCTATAAG    |       |       |       |       |       |       |       |
| SARS-CoV-2 Reference Genome NC_045512.2              | (1)     | -----                                                                            |       |       |       |       |       |       |       |
|                                                      | (1)     | -----                                                                            |       |       |       |       |       |       |       |
| Section 532                                          |         |                                                                                  |       |       |       |       |       |       |       |
| Candidatus Carsonella ruddii strain BT chromosome... | (40888) | 40888                                                                            | 40898 | 40909 | 40920 | 40931 | 40942 | 40953 | 40964 |
| Candidatus Carsonella 135557 - 167442nt              | (40888) | GAAATTTAGTTCTAACTATAATAGCATTTAATACTTGACCTTTTTTAACTTTAGAATTAAAATTTGAACTTTTAACA    |       |       |       |       |       |       |       |
| SARS-CoV-2 Reference Genome NC_045512.2              | (1)     | -----                                                                            |       |       |       |       |       |       |       |
|                                                      | (1)     | -----                                                                            |       |       |       |       |       |       |       |
| Section 533                                          |         |                                                                                  |       |       |       |       |       |       |       |
| Candidatus Carsonella ruddii strain BT chromosome... | (40965) | 40965                                                                            | 40975 | 40986 | 40997 | 41008 | 41019 | 41030 | 41041 |
| Candidatus Carsonella 135557 - 167442nt              | (40965) | ACTACTTTAATTATATCTCCAATTTTAGCAAAAAATTTTTTTGAACCATTTAAACCTTTTATACATTTAACAATTTT    |       |       |       |       |       |       |       |
| SARS-CoV-2 Reference Genome NC_045512.2              | (1)     | -----                                                                            |       |       |       |       |       |       |       |
|                                                      | (1)     | -----                                                                            |       |       |       |       |       |       |       |
| Section 534                                          |         |                                                                                  |       |       |       |       |       |       |       |
| Candidatus Carsonella ruddii strain BT chromosome... | (41042) | 41042                                                                            | 41052 | 41063 | 41074 | 41085 | 41096 | 41107 | 41118 |
| Candidatus Carsonella 135557 - 167442nt              | (41042) | TCCACCACCTATTATCAATAACTTTTAATTTAGTTTGTTCTTGATCATATTAATTTTACTTTTTCAATAATTTTGA     |       |       |       |       |       |       |       |
| SARS-CoV-2 Reference Genome NC_045512.2              | (1)     | -----                                                                            |       |       |       |       |       |       |       |
|                                                      | (1)     | -----                                                                            |       |       |       |       |       |       |       |

## SARS-CoV-2 &amp; Bakterien.apr

|                                                      |         |                                                                                 |       |       |       |       |       |       |       |
|------------------------------------------------------|---------|---------------------------------------------------------------------------------|-------|-------|-------|-------|-------|-------|-------|
|                                                      |         | Section 535                                                                     |       |       |       |       |       |       |       |
| Candidatus Carsonella ruddii strain BT chromosome... | (41119) | 41119                                                                           | 41129 | 41140 | 41151 | 41162 | 41173 | 41184 | 41195 |
|                                                      | (41119) | TACTATCCAAAAAATTGTTTTAGTTAAAGGTCTAGATTTTGTTACAATAATATAATCTCCAATATTTGTTTCATTAA   |       |       |       |       |       |       |       |
|                                                      | (1)     | -----                                                                           |       |       |       |       |       |       |       |
| Candidatus Carsonella 135557 - 167442nt              | (1)     | -----                                                                           |       |       |       |       |       |       |       |
| SARS-CoV-2 Reference Genome NC_045512.2              | (1)     | -----                                                                           |       |       |       |       |       |       |       |
|                                                      |         | Section 536                                                                     |       |       |       |       |       |       |       |
| Candidatus Carsonella ruddii strain BT chromosome... | (41196) | 41196                                                                           | 41206 | 41217 | 41228 | 41239 | 41250 | 41261 | 41272 |
|                                                      | (41196) | AAATGTCATATGATATTAATTTTTTATAATAAAAAATTCCTTTATTTAAAAATAGGTAAAAATATAACTTTTTTTAATT |       |       |       |       |       |       |       |
|                                                      | (1)     | -----                                                                           |       |       |       |       |       |       |       |
| Candidatus Carsonella 135557 - 167442nt              | (1)     | -----                                                                           |       |       |       |       |       |       |       |
| SARS-CoV-2 Reference Genome NC_045512.2              | (1)     | -----                                                                           |       |       |       |       |       |       |       |
|                                                      |         | Section 537                                                                     |       |       |       |       |       |       |       |
| Candidatus Carsonella ruddii strain BT chromosome... | (41273) | 41273                                                                           | 41283 | 41294 | 41305 | 41316 | 41327 | 41338 | 41349 |
|                                                      | (41273) | ATAATAATAATTTTTTTAAATTTTTTTTTTAATAACTCTTCCAAATGTTTTATTCATAACAAATTTTCAGTTTTAATAG |       |       |       |       |       |       |       |
|                                                      | (1)     | -----                                                                           |       |       |       |       |       |       |       |
| Candidatus Carsonella 135557 - 167442nt              | (1)     | -----                                                                           |       |       |       |       |       |       |       |
| SARS-CoV-2 Reference Genome NC_045512.2              | (1)     | -----                                                                           |       |       |       |       |       |       |       |
|                                                      |         | Section 538                                                                     |       |       |       |       |       |       |       |
| Candidatus Carsonella ruddii strain BT chromosome... | (41350) | 41350                                                                           | 41360 | 41371 | 41382 | 41393 | 41404 | 41415 | 41426 |
|                                                      | (41350) | ATAATTTTTTGAGCGGCACAAAAAACGATTTTTTTTACAATATCAAAATTTTCATATTTAACTTCAAAAATAATTATT  |       |       |       |       |       |       |       |
|                                                      | (1)     | -----                                                                           |       |       |       |       |       |       |       |
| Candidatus Carsonella 135557 - 167442nt              | (1)     | -----                                                                           |       |       |       |       |       |       |       |
| SARS-CoV-2 Reference Genome NC_045512.2              | (1)     | -----                                                                           |       |       |       |       |       |       |       |
|                                                      |         | Section 539                                                                     |       |       |       |       |       |       |       |
| Candidatus Carsonella ruddii strain BT chromosome... | (41427) | 41427                                                                           | 41437 | 41448 | 41459 | 41470 | 41481 | 41492 | 41503 |
|                                                      | (41427) | CCAGGTTTAATAACAGATACCCAATCATGTATATTTCCCTTACCTTTACCCATTCTAACTTCTAAAGGTTTTTTAGT   |       |       |       |       |       |       |       |
|                                                      | (1)     | -----                                                                           |       |       |       |       |       |       |       |
| Candidatus Carsonella 135557 - 167442nt              | (1)     | -----                                                                           |       |       |       |       |       |       |       |
| SARS-CoV-2 Reference Genome NC_045512.2              | (1)     | -----                                                                           |       |       |       |       |       |       |       |
|                                                      |         | Section 540                                                                     |       |       |       |       |       |       |       |
| Candidatus Carsonella ruddii strain BT chromosome... | (41504) | 41504                                                                           | 41514 | 41525 | 41536 | 41547 | 41558 | 41569 | 41580 |
|                                                      | (41504) | AATTACTTTATCTGGAAAAATTCATAAGAATTTTATTATTTTCCCTAAATTATGAACTAAAGATTTTCTAGCAG      |       |       |       |       |       |       |       |
|                                                      | (1)     | -----                                                                           |       |       |       |       |       |       |       |
| Candidatus Carsonella 135557 - 167442nt              | (1)     | -----                                                                           |       |       |       |       |       |       |       |
| SARS-CoV-2 Reference Genome NC_045512.2              | (1)     | -----                                                                           |       |       |       |       |       |       |       |

## SARS-CoV-2 &amp; Bakterien.apr

|                                                      |         |                                                                                 |       |       |       |       |       |
|------------------------------------------------------|---------|---------------------------------------------------------------------------------|-------|-------|-------|-------|-------|
| Section 541                                          |         |                                                                                 |       |       |       |       |       |
| Candidatus Carsonella ruddii strain BT chromosome... | (41581) | 41581                                                                           | 41591 | 41602 | 41613 | 41624 | 41635 |
| Candidatus Carsonella 135557 - 167442nt              | (41581) | ATTCAATCTGCTTAAATTTAAAAATCCGTTATCTAATGATTTTAATCCATAATTACCAAAAAATTAAAAATTTTCTT   |       |       |       |       |       |
| SARS-CoV-2 Reference Genome NC_045512.2              | (1)     | -----                                                                           |       |       |       |       |       |
|                                                      | (1)     | -----                                                                           |       |       |       |       |       |
| Section 542                                          |         |                                                                                 |       |       |       |       |       |
| Candidatus Carsonella ruddii strain BT chromosome... | (41658) | 41658                                                                           | 41668 | 41679 | 41690 | 41701 | 41712 |
| Candidatus Carsonella 135557 - 167442nt              | (41658) | TTACAAGAAAAACCTTTATTTCTATTTTTTTTGATATTTTAAAAATTTTAATTGATTAGGTTTTTGTTTCATATTTTT  |       |       |       |       |       |
| SARS-CoV-2 Reference Genome NC_045512.2              | (1)     | -----                                                                           |       |       |       |       |       |
|                                                      | (1)     | -----                                                                           |       |       |       |       |       |
| Section 543                                          |         |                                                                                 |       |       |       |       |       |
| Candidatus Carsonella ruddii strain BT chromosome... | (41735) | 41735                                                                           | 41745 | 41756 | 41767 | 41778 | 41789 |
| Candidatus Carsonella 135557 - 167442nt              | (41735) | TATTTTTTTTATTTATTAAAAATCCAAGTTTTAATACCTAAAAATACCATATTGTGATATAAATTCACAAAAATAATAA |       |       |       |       |       |
| SARS-CoV-2 Reference Genome NC_045512.2              | (1)     | -----                                                                           |       |       |       |       |       |
|                                                      | (1)     | -----                                                                           |       |       |       |       |       |
| Section 544                                          |         |                                                                                 |       |       |       |       |       |
| Candidatus Carsonella ruddii strain BT chromosome... | (41812) | 41812                                                                           | 41822 | 41833 | 41844 | 41855 | 41866 |
| Candidatus Carsonella 135557 - 167442nt              | (41812) | TCTAATTTACATCTAATTGTATGTAATGGTATACTACCAAATAAATACCATTCTTTTCTAGCTATATCTACTCCTTC   |       |       |       |       |       |
| SARS-CoV-2 Reference Genome NC_045512.2              | (1)     | -----                                                                           |       |       |       |       |       |
|                                                      | (1)     | -----                                                                           |       |       |       |       |       |
| Section 545                                          |         |                                                                                 |       |       |       |       |       |
| Candidatus Carsonella ruddii strain BT chromosome... | (41889) | 41889                                                                           | 41899 | 41910 | 41921 | 41932 | 41943 |
| Candidatus Carsonella 135557 - 167442nt              | (41889) | TAATCTTCCACTTATTTGAACCTTTACATCCATTAAATTGTTTATTAAATTTTAATATTTCTTTTTTTATAATTCTTT  |       |       |       |       |       |
| SARS-CoV-2 Reference Genome NC_045512.2              | (1)     | -----                                                                           |       |       |       |       |       |
|                                                      | (1)     | -----                                                                           |       |       |       |       |       |
| Section 546                                          |         |                                                                                 |       |       |       |       |       |
| Candidatus Carsonella ruddii strain BT chromosome... | (41966) | 41966                                                                           | 41976 | 41987 | 41998 | 42009 | 42020 |
| Candidatus Carsonella 135557 - 167442nt              | (41966) | TTGTAGATGATTTATTATCTAATTGATTTAATATATTTTAAAGATAATAATTTAGCATTTATAAATTCTTCTAAACAA  |       |       |       |       |       |
| SARS-CoV-2 Reference Genome NC_045512.2              | (1)     | -----                                                                           |       |       |       |       |       |
|                                                      | (1)     | -----                                                                           |       |       |       |       |       |

|                                                      |         |                                                                                   |       |       |       |       |       |       |       |
|------------------------------------------------------|---------|-----------------------------------------------------------------------------------|-------|-------|-------|-------|-------|-------|-------|
| Section 547                                          |         |                                                                                   |       |       |       |       |       |       |       |
| Candidatus Carsonella ruddii strain BT chromosome... | (42043) | 42043                                                                             | 42053 | 42064 | 42075 | 42086 | 42097 | 42108 | 42119 |
| Candidatus Carsonella 135557 - 167442nt              | (42043) | AAATTAATAATAATATTTATTTTTTAAAATTTTAGAAAAATTCTAAAATAAAAAAATCAATATAAAAAATAAAAAATCTTC |       |       |       |       |       |       |       |
| SARS-CoV-2 Reference Genome NC_045512.2              | (1)     | -----                                                                             |       |       |       |       |       |       |       |
|                                                      | (1)     | -----                                                                             |       |       |       |       |       |       |       |
| Section 548                                          |         |                                                                                   |       |       |       |       |       |       |       |
| Candidatus Carsonella ruddii strain BT chromosome... | (42120) | 42120                                                                             | 42130 | 42141 | 42152 | 42163 | 42174 | 42185 | 42196 |
| Candidatus Carsonella 135557 - 167442nt              | (42120) | AATTTTTTCTAAATCATTTAAATATATATTTAATTTTAAAAAATTTGAAATAATTATATCTATACAACCTTATATTAA    |       |       |       |       |       |       |       |
| SARS-CoV-2 Reference Genome NC_045512.2              | (1)     | -----                                                                             |       |       |       |       |       |       |       |
|                                                      | (1)     | -----                                                                             |       |       |       |       |       |       |       |
| Section 549                                          |         |                                                                                   |       |       |       |       |       |       |       |
| Candidatus Carsonella ruddii strain BT chromosome... | (42197) | 42197                                                                             | 42207 | 42218 | 42229 | 42240 | 42251 | 42262 | 42273 |
| Candidatus Carsonella 135557 - 167442nt              | (42197) | TAAAAAAAAAATTTTTTTTTTAAAATTTCTTTTATTAAAAATATTAATTCCTAATTTTTTTTGAATATTTTTTTTTTGTTT |       |       |       |       |       |       |       |
| SARS-CoV-2 Reference Genome NC_045512.2              | (1)     | -----                                                                             |       |       |       |       |       |       |       |
|                                                      | (1)     | -----                                                                             |       |       |       |       |       |       |       |
| Section 550                                          |         |                                                                                   |       |       |       |       |       |       |       |
| Candidatus Carsonella ruddii strain BT chromosome... | (42274) | 42274                                                                             | 42284 | 42295 | 42306 | 42317 | 42328 | 42339 | 42350 |
| Candidatus Carsonella 135557 - 167442nt              | (42274) | TCATACCATAAACTGTTATAACAAACAGATTTTCCTAAACGAAAAAAAAATAGGATTAATTTTTTTTACCCATAAATTA   |       |       |       |       |       |       |       |
| SARS-CoV-2 Reference Genome NC_045512.2              | (1)     | -----                                                                             |       |       |       |       |       |       |       |
|                                                      | (1)     | -----                                                                             |       |       |       |       |       |       |       |
| Section 551                                          |         |                                                                                   |       |       |       |       |       |       |       |
| Candidatus Carsonella ruddii strain BT chromosome... | (42351) | 42351                                                                             | 42361 | 42372 | 42383 | 42394 | 42405 | 42416 | 42427 |
| Candidatus Carsonella 135557 - 167442nt              | (42351) | CATTTATTATAATATTTGAATATCTTTTAATAATAAAATTTATTCTTCCTTTAGCTCTAAAATTTATTTTTTTTTATA    |       |       |       |       |       |       |       |
| SARS-CoV-2 Reference Genome NC_045512.2              | (1)     | -----                                                                             |       |       |       |       |       |       |       |
|                                                      | (1)     | -----                                                                             |       |       |       |       |       |       |       |
| Section 552                                          |         |                                                                                   |       |       |       |       |       |       |       |
| Candidatus Carsonella ruddii strain BT chromosome... | (42428) | 42428                                                                             | 42438 | 42449 | 42460 | 42471 | 42482 | 42493 | 42504 |
| Candidatus Carsonella 135557 - 167442nt              | (42428) | ATTAAACTTTTTCTACTAAAAATTGTTTTATAAAAAACATTAGTAGTTTTACAATTATTAATAATTAATTAACAAT      |       |       |       |       |       |       |       |
| SARS-CoV-2 Reference Genome NC_045512.2              | (1)     | -----                                                                             |       |       |       |       |       |       |       |
|                                                      | (1)     | -----                                                                             |       |       |       |       |       |       |       |

|                                                      |         |                                                                                   |       |       |       |       |       |       |       |
|------------------------------------------------------|---------|-----------------------------------------------------------------------------------|-------|-------|-------|-------|-------|-------|-------|
| Section 553                                          |         |                                                                                   |       |       |       |       |       |       |       |
| Candidatus Carsonella ruddii strain BT chromosome... | (42505) | 42505                                                                             | 42515 | 42526 | 42537 | 42548 | 42559 | 42570 | 42581 |
| Candidatus Carsonella 135557 - 167442nt              | (42505) | TTGTTTTAAATAAAAAATCTATTTTTTTTTTAAAAAAATATTATTTATATAAAATAATATAGGTTTGTTAGATAAAAAATT |       |       |       |       |       |       |       |
| SARS-CoV-2 Reference Genome NC_045512.2              | (1)     | -----                                                                             |       |       |       |       |       |       |       |
|                                                      | (1)     | -----                                                                             |       |       |       |       |       |       |       |
| Section 554                                          |         |                                                                                   |       |       |       |       |       |       |       |
| Candidatus Carsonella ruddii strain BT chromosome... | (42582) | 42582                                                                             | 42592 | 42603 | 42614 | 42625 | 42636 | 42647 | 42658 |
| Candidatus Carsonella 135557 - 167442nt              | (42582) | TAGAATATAAACTTAATTTTTTGTAAAGAAATAGGAATAAAATTCCATTTTAAATTTAAAAATTATTTAACATTTTTTATT |       |       |       |       |       |       |       |
| SARS-CoV-2 Reference Genome NC_045512.2              | (1)     | -----                                                                             |       |       |       |       |       |       |       |
|                                                      | (1)     | -----                                                                             |       |       |       |       |       |       |       |
| Section 555                                          |         |                                                                                   |       |       |       |       |       |       |       |
| Candidatus Carsonella ruddii strain BT chromosome... | (42659) | 42659                                                                             | 42669 | 42680 | 42691 | 42702 | 42713 | 42724 | 42735 |
| Candidatus Carsonella 135557 - 167442nt              | (42659) | TTTAATTTTTTTTTGTATGTGATTTAAAATTTCTTGTAAGAAAATTCCTAATTTATGTCCAATCATGTTTTTCGT       |       |       |       |       |       |       |       |
| SARS-CoV-2 Reference Genome NC_045512.2              | (1)     | -----                                                                             |       |       |       |       |       |       |       |
|                                                      | (1)     | -----                                                                             |       |       |       |       |       |       |       |
| Section 556                                          |         |                                                                                   |       |       |       |       |       |       |       |
| Candidatus Carsonella ruddii strain BT chromosome... | (42736) | 42736                                                                             | 42746 | 42757 | 42768 | 42779 | 42790 | 42801 | 42812 |
| Candidatus Carsonella 135557 - 167442nt              | (42736) | TTATATAAACTTTAATAAAATCTTTTTCCATTATGAACATATATTGTAAAATCAACCATATCAGGTATGATTGTAGAA    |       |       |       |       |       |       |       |
| SARS-CoV-2 Reference Genome NC_045512.2              | (1)     | -----                                                                             |       |       |       |       |       |       |       |
|                                                      | (1)     | -----                                                                             |       |       |       |       |       |       |       |
| Section 557                                          |         |                                                                                   |       |       |       |       |       |       |       |
| Candidatus Carsonella ruddii strain BT chromosome... | (42813) | 42813                                                                             | 42823 | 42834 | 42845 | 42856 | 42867 | 42878 | 42889 |
| Candidatus Carsonella 135557 - 167442nt              | (42813) | TTTCTAGACCAAGTTTTTATATTATTTTTAGAAAATTTAAAAATAATGATTTATTTATAAAAAATTCCTTTTTTTTAA    |       |       |       |       |       |       |       |
| SARS-CoV-2 Reference Genome NC_045512.2              | (1)     | -----                                                                             |       |       |       |       |       |       |       |
|                                                      | (1)     | -----                                                                             |       |       |       |       |       |       |       |
| Section 558                                          |         |                                                                                   |       |       |       |       |       |       |       |
| Candidatus Carsonella ruddii strain BT chromosome... | (42890) | 42890                                                                             | 42900 | 42911 | 42922 | 42933 | 42944 | 42955 | 42966 |
| Candidatus Carsonella 135557 - 167442nt              | (42890) | TGATCTAATCATTTTTTTAGTTTTATATCCTTTTGATTTTTTTTCCTTTAGGAGAACAAAGGATGTCTACCACCACTAGT  |       |       |       |       |       |       |       |
| SARS-CoV-2 Reference Genome NC_045512.2              | (1)     | -----                                                                             |       |       |       |       |       |       |       |
|                                                      | (1)     | -----                                                                             |       |       |       |       |       |       |       |

|                                                      |         |                                                                                |       |       |       |       |       |       |       |
|------------------------------------------------------|---------|--------------------------------------------------------------------------------|-------|-------|-------|-------|-------|-------|-------|
|                                                      |         | Section 559                                                                    |       |       |       |       |       |       |       |
| Candidatus Carsonella ruddii strain BT chromosome... | (42967) | 42967                                                                          | 42977 | 42988 | 42999 | 43010 | 43021 | 43032 | 43043 |
|                                                      | (42967) | TTTACCTTCTCCACCACCTAATGGATGATCGACTGGATTTCATCGCAACACCTCTTACTGTAGGTCTAATTCCTTTCC |       |       |       |       |       |       |       |
|                                                      | (1)     | -----                                                                          |       |       |       |       |       |       |       |
| Candidatus Carsonella 135557 - 167442nt              | (1)     | -----                                                                          |       |       |       |       |       |       |       |
| SARS-CoV-2 Reference Genome NC_045512.2              | (1)     | -----                                                                          |       |       |       |       |       |       |       |
|                                                      |         | Section 560                                                                    |       |       |       |       |       |       |       |
| Candidatus Carsonella ruddii strain BT chromosome... | (43044) | 43044                                                                          | 43054 | 43065 | 43076 | 43087 | 43098 | 43109 | 43120 |
|                                                      | (43044) | ATCTATTTTGACCAGCTTTATATAATTTTTTTTATGTTTATTAAAAATTTTCCTAATGTAGCCATACAATTTAAA    |       |       |       |       |       |       |       |
|                                                      | (1)     | -----                                                                          |       |       |       |       |       |       |       |
| Candidatus Carsonella 135557 - 167442nt              | (1)     | -----                                                                          |       |       |       |       |       |       |       |
| SARS-CoV-2 Reference Genome NC_045512.2              | (1)     | -----                                                                          |       |       |       |       |       |       |       |
|                                                      |         | Section 561                                                                    |       |       |       |       |       |       |       |
| Candidatus Carsonella ruddii strain BT chromosome... | (43121) | 43121                                                                          | 43131 | 43142 | 43153 | 43164 | 43175 | 43186 | 43197 |
|                                                      | (43121) | GATATTTTATTTTTTTGAAAGATGAAAGTTTTAAAAATACAATATTTACTATCTTTAAAAATTAATTCAGAGTTTGT  |       |       |       |       |       |       |       |
|                                                      | (1)     | -----                                                                          |       |       |       |       |       |       |       |
| Candidatus Carsonella 135557 - 167442nt              | (1)     | -----                                                                          |       |       |       |       |       |       |       |
| SARS-CoV-2 Reference Genome NC_045512.2              | (1)     | -----                                                                          |       |       |       |       |       |       |       |
|                                                      |         | Section 562                                                                    |       |       |       |       |       |       |       |
| Candidatus Carsonella ruddii strain BT chromosome... | (43198) | 43198                                                                          | 43208 | 43219 | 43230 | 43241 | 43252 | 43263 | 43274 |
|                                                      | (43198) | TCCGGAACCTCTAGAAAAAATTGCTCCAGATTGAGGCTTTTTTCTATACAATTTAAAAAAGAACCTATTGGAAAAAT  |       |       |       |       |       |       |       |
|                                                      | (1)     | -----                                                                          |       |       |       |       |       |       |       |
| Candidatus Carsonella 135557 - 167442nt              | (1)     | -----                                                                          |       |       |       |       |       |       |       |
| SARS-CoV-2 Reference Genome NC_045512.2              | (1)     | -----                                                                          |       |       |       |       |       |       |       |
|                                                      |         | Section 563                                                                    |       |       |       |       |       |       |       |
| Candidatus Carsonella ruddii strain BT chromosome... | (43275) | 43275                                                                          | 43285 | 43296 | 43307 | 43318 | 43329 | 43340 | 43351 |
|                                                      | (43275) | TTTTTATTCTGGTAGAATTACCAGAATTGAAAACAGGATTATTTATACTTGAAATTATTTGATCATTATATAAACATT |       |       |       |       |       |       |       |
|                                                      | (1)     | -----                                                                          |       |       |       |       |       |       |       |
| Candidatus Carsonella 135557 - 167442nt              | (1)     | -----                                                                          |       |       |       |       |       |       |       |
| SARS-CoV-2 Reference Genome NC_045512.2              | (1)     | -----                                                                          |       |       |       |       |       |       |       |
|                                                      |         | Section 564                                                                    |       |       |       |       |       |       |       |
| Candidatus Carsonella ruddii strain BT chromosome... | (43352) | 43352                                                                          | 43362 | 43373 | 43384 | 43395 | 43406 | 43417 | 43428 |
|                                                      | (43352) | TCATTAGTTCTTAATATATATCTATATTCTCCATCTAAATATTTTAATAAAGCTAAATCAACATTTCTATTTGGGTC  |       |       |       |       |       |       |       |
|                                                      | (1)     | -----                                                                          |       |       |       |       |       |       |       |
| Candidatus Carsonella 135557 - 167442nt              | (1)     | -----                                                                          |       |       |       |       |       |       |       |
| SARS-CoV-2 Reference Genome NC_045512.2              | (1)     | -----                                                                          |       |       |       |       |       |       |       |

|                                                      |         |                                                                                 |       |       |       |       |       |       |       |
|------------------------------------------------------|---------|---------------------------------------------------------------------------------|-------|-------|-------|-------|-------|-------|-------|
| Section 565                                          |         |                                                                                 |       |       |       |       |       |       |       |
| Candidatus Carsonella ruddii strain BT chromosome... | (43429) | 43429                                                                           | 43439 | 43450 | 43461 | 43472 | 43483 | 43494 | 43505 |
| Candidatus Carsonella 135557 - 167442nt              | (43429) | ATAATCAAATCTTATTATTTTTGAAGGTATATCAAATTTATTTCTTAAAAAATCTATTTTTCTATACAATTTTTTAT   |       |       |       |       |       |       |       |
| SARS-CoV-2 Reference Genome NC_045512.2              | (1)     | -----                                                                           |       |       |       |       |       |       |       |
|                                                      | (1)     | -----                                                                           |       |       |       |       |       |       |       |
| Section 566                                          |         |                                                                                 |       |       |       |       |       |       |       |
| Candidatus Carsonella ruddii strain BT chromosome... | (43506) | 43506                                                                           | 43516 | 43527 | 43538 | 43549 | 43560 | 43571 | 43582 |
| Candidatus Carsonella 135557 - 167442nt              | (43506) | GTTTATTTCCAATATGTCTTACTGAAATTTTACCATGACTTCTTCCAGAATTTTGTTTTTTAAAAAACACATTTTT    |       |       |       |       |       |       |       |
| SARS-CoV-2 Reference Genome NC_045512.2              | (1)     | -----                                                                           |       |       |       |       |       |       |       |
|                                                      | (1)     | -----                                                                           |       |       |       |       |       |       |       |
| Section 567                                          |         |                                                                                 |       |       |       |       |       |       |       |
| Candidatus Carsonella ruddii strain BT chromosome... | (43583) | 43583                                                                           | 43593 | 43604 | 43615 | 43626 | 43637 | 43648 | 43659 |
| Candidatus Carsonella 135557 - 167442nt              | (43583) | TTAAAAATATTCATTTAAAAATATTATTTATTAAATAAAAAAAGATTTTTTTTCAATAAAGATTATTTCAAATTTT    |       |       |       |       |       |       |       |
| SARS-CoV-2 Reference Genome NC_045512.2              | (1)     | -----                                                                           |       |       |       |       |       |       |       |
|                                                      | (1)     | -----                                                                           |       |       |       |       |       |       |       |
| Section 568                                          |         |                                                                                 |       |       |       |       |       |       |       |
| Candidatus Carsonella ruddii strain BT chromosome... | (43660) | 43660                                                                           | 43670 | 43681 | 43692 | 43703 | 43714 | 43725 | 43736 |
| Candidatus Carsonella 135557 - 167442nt              | (43660) | AAAAAATCATAAACTGATATTTTTTTTAATATCTTTAAAAAACAATTATTTAAATTATTAAAAATTAAATTTTTTTT   |       |       |       |       |       |       |       |
| SARS-CoV-2 Reference Genome NC_045512.2              | (1)     | -----                                                                           |       |       |       |       |       |       |       |
|                                                      | (1)     | -----                                                                           |       |       |       |       |       |       |       |
| Section 569                                          |         |                                                                                 |       |       |       |       |       |       |       |
| Candidatus Carsonella ruddii strain BT chromosome... | (43737) | 43737                                                                           | 43747 | 43758 | 43769 | 43780 | 43791 | 43802 | 43813 |
| Candidatus Carsonella 135557 - 167442nt              | (43737) | ATTTCTAAAAATAAAAAATAAAAAACAACAAATTTTTTTTCATAAATATAAATTTTATTATTTATTAAAAATAAAAAA  |       |       |       |       |       |       |       |
| SARS-CoV-2 Reference Genome NC_045512.2              | (1)     | -----                                                                           |       |       |       |       |       |       |       |
|                                                      | (1)     | -----                                                                           |       |       |       |       |       |       |       |
| Section 570                                          |         |                                                                                 |       |       |       |       |       |       |       |
| Candidatus Carsonella ruddii strain BT chromosome... | (43814) | 43814                                                                           | 43824 | 43835 | 43846 | 43857 | 43868 | 43879 | 43890 |
| Candidatus Carsonella 135557 - 167442nt              | (43814) | ATAAATTTTCAAATATTTTTTTTAATATTTTTTTTTTTTTTTAGAAAATAAATAATTTGAAAAAGTTACTCCACCACCT |       |       |       |       |       |       |       |
| SARS-CoV-2 Reference Genome NC_045512.2              | (1)     | -----                                                                           |       |       |       |       |       |       |       |
|                                                      | (1)     | -----                                                                           |       |       |       |       |       |       |       |

## SARS-CoV-2 &amp; Bakterien.apr

|                                                      |         |                                                                               |       |       |       |       |       |       |       |
|------------------------------------------------------|---------|-------------------------------------------------------------------------------|-------|-------|-------|-------|-------|-------|-------|
| Section 571                                          |         |                                                                               |       |       |       |       |       |       |       |
| Candidatus Carsonella ruddii strain BT chromosome... | (43891) | 43891                                                                         | 43901 | 43912 | 43923 | 43934 | 43945 | 43956 | 43967 |
| Candidatus Carsonella 135557 - 167442nt              | (43891) | CTCCAAATTGGAGATTTTTTATCTCCAGCTCTTGCTCTTCCAGTACCTTTTTGAGGCCAAGGTTTTTTTCCACTTCC |       |       |       |       |       |       |       |
| SARS-CoV-2 Reference Genome NC_045512.2              | (1)     | -----                                                                         |       |       |       |       |       |       |       |
|                                                      | (1)     | -----                                                                         |       |       |       |       |       |       |       |
| Section 572                                          |         |                                                                               |       |       |       |       |       |       |       |
| Candidatus Carsonella ruddii strain BT chromosome... | (43968) | 43968                                                                         | 43978 | 43989 | 44000 | 44011 | 44022 | 44033 | 44044 |
| Candidatus Carsonella 135557 - 167442nt              | (43968) | TTTTACCAATCTTTTATTTTTTTTAAATTTTTTTGTTTAATTTTATTTTTTAAAAAATATAAATTAAATTTATAT   |       |       |       |       |       |       |       |
| SARS-CoV-2 Reference Genome NC_045512.2              | (1)     | -----                                                                         |       |       |       |       |       |       |       |
|                                                      | (1)     | -----                                                                         |       |       |       |       |       |       |       |
| Section 573                                          |         |                                                                               |       |       |       |       |       |       |       |
| Candidatus Carsonella ruddii strain BT chromosome... | (44045) | 44045                                                                         | 44055 | 44066 | 44077 | 44088 | 44099 | 44110 | 44121 |
| Candidatus Carsonella 135557 - 167442nt              | (44045) | TTAATTCTTTTATATAAATATTTAAATATTTAGGTAAAAAACTAAAAATGGGTAGTTTCATAATATTTTTCCATATA |       |       |       |       |       |       |       |
| SARS-CoV-2 Reference Genome NC_045512.2              | (1)     | -----                                                                         |       |       |       |       |       |       |       |
|                                                      | (1)     | -----                                                                         |       |       |       |       |       |       |       |
| Section 574                                          |         |                                                                               |       |       |       |       |       |       |       |
| Candidatus Carsonella ruddii strain BT chromosome... | (44122) | 44122                                                                         | 44132 | 44143 | 44154 | 44165 | 44176 | 44187 | 44198 |
| Candidatus Carsonella 135557 - 167442nt              | (44122) | TAAATCATTTTTTTTACCAGGTAATATTTTTGAAAAATAAAAAATAATTTTTATTTCTTAAAAAATTTTTAAATAT  |       |       |       |       |       |       |       |
| SARS-CoV-2 Reference Genome NC_045512.2              | (1)     | -----                                                                         |       |       |       |       |       |       |       |
|                                                      | (1)     | -----                                                                         |       |       |       |       |       |       |       |
| Section 575                                          |         |                                                                               |       |       |       |       |       |       |       |
| Candidatus Carsonella ruddii strain BT chromosome... | (44199) | 44199                                                                         | 44209 | 44220 | 44231 | 44242 | 44253 | 44264 | 44275 |
| Candidatus Carsonella 135557 - 167442nt              | (44199) | GTAGAAAAAATAATATCACCCATTTTTCCAGGCATTTTTTCCCTTTAAAAACTTTGCCAGGATCTTGACATTGTCC  |       |       |       |       |       |       |       |
| SARS-CoV-2 Reference Genome NC_045512.2              | (1)     | -----                                                                         |       |       |       |       |       |       |       |
|                                                      | (1)     | -----                                                                         |       |       |       |       |       |       |       |
| Section 576                                          |         |                                                                               |       |       |       |       |       |       |       |
| Candidatus Carsonella ruddii strain BT chromosome... | (44276) | 44276                                                                         | 44286 | 44297 | 44308 | 44319 | 44330 | 44341 | 44352 |
| Candidatus Carsonella 135557 - 167442nt              | (44276) | AGTAGATCCCATAGTTCTATATGATAAAGAACAGCCATGACTTTTATCTTTTGTTTTAAACCCCATTTTTTTATAA  |       |       |       |       |       |       |       |
| SARS-CoV-2 Reference Genome NC_045512.2              | (1)     | -----                                                                         |       |       |       |       |       |       |       |
|                                                      | (1)     | -----                                                                         |       |       |       |       |       |       |       |



## SARS-CoV-2 &amp; Bakterien.apr

|                                                      |         |                                                                                  |       |       |       |       |       |             |
|------------------------------------------------------|---------|----------------------------------------------------------------------------------|-------|-------|-------|-------|-------|-------------|
|                                                      |         | Section 577                                                                      |       |       |       |       |       |             |
| Candidatus Carsonella ruddii strain BT chromosome... | (44353) | 44353                                                                            | 44363 | 44374 | 44385 | 44396 | 44407 | 44418 44429 |
|                                                      | (44353) | CTCCTTGAAAACCTTTACCATTACTTATAGATTTTAAATAAAAGATAATTAAAAGAAAAATTTAATAAAATTTTGTTT   |       |       |       |       |       |             |
|                                                      | (1)     | -----                                                                            |       |       |       |       |       |             |
| Candidatus Carsonella 135557 - 167442nt              | (1)     | -----                                                                            |       |       |       |       |       |             |
| SARS-CoV-2 Reference Genome NC_045512.2              | (1)     | -----                                                                            |       |       |       |       |       |             |
|                                                      |         | Section 578                                                                      |       |       |       |       |       |             |
| Candidatus Carsonella ruddii strain BT chromosome... | (44430) | 44430                                                                            | 44440 | 44451 | 44462 | 44473 | 44484 | 44495 44506 |
|                                                      | (44430) | AAATTAATATATTTTATTATATTTAATAATATTTTTTTTATTAATAAAAAATTGTTTAATTCCTTTATTAATGAA      |       |       |       |       |       |             |
|                                                      | (1)     | -----                                                                            |       |       |       |       |       |             |
| Candidatus Carsonella 135557 - 167442nt              | (1)     | -----                                                                            |       |       |       |       |       |             |
| SARS-CoV-2 Reference Genome NC_045512.2              | (1)     | -----                                                                            |       |       |       |       |       |             |
|                                                      |         | Section 579                                                                      |       |       |       |       |       |             |
| Candidatus Carsonella ruddii strain BT chromosome... | (44507) | 44507                                                                            | 44517 | 44528 | 44539 | 44550 | 44561 | 44572 44583 |
|                                                      | (44507) | AATCATAAAAACAAATAATTTAATAATAAACCATCTATATTTCTATTTTTAAAAAGAAAATTTATTAAGTTTAAATC    |       |       |       |       |       |             |
|                                                      | (1)     | -----                                                                            |       |       |       |       |       |             |
| Candidatus Carsonella 135557 - 167442nt              | (1)     | -----                                                                            |       |       |       |       |       |             |
| SARS-CoV-2 Reference Genome NC_045512.2              | (1)     | -----                                                                            |       |       |       |       |       |             |
|                                                      |         | Section 580                                                                      |       |       |       |       |       |             |
| Candidatus Carsonella ruddii strain BT chromosome... | (44584) | 44584                                                                            | 44594 | 44605 | 44616 | 44627 | 44638 | 44649 44660 |
|                                                      | (44584) | AAAATTTTTAATAAAAAAAAAAACTTTAAATATTTAATTTGTATTTGATCTCTTGCATTTTTATCAACGTGTGGTG     |       |       |       |       |       |             |
|                                                      | (1)     | -----                                                                            |       |       |       |       |       |             |
| Candidatus Carsonella 135557 - 167442nt              | (1)     | -----                                                                            |       |       |       |       |       |             |
| SARS-CoV-2 Reference Genome NC_045512.2              | (1)     | -----                                                                            |       |       |       |       |       |             |
|                                                      |         | Section 581                                                                      |       |       |       |       |       |             |
| Candidatus Carsonella ruddii strain BT chromosome... | (44661) | 44661                                                                            | 44671 | 44682 | 44693 | 44704 | 44715 | 44726 44737 |
|                                                      | (44661) | AAACTAATAAAGTAAATTTTTCAATTTTTTTAGGCATATAAAATGGACCAATTATCTTATATTTTTTTTTTATATTT    |       |       |       |       |       |             |
|                                                      | (1)     | -----                                                                            |       |       |       |       |       |             |
| Candidatus Carsonella 135557 - 167442nt              | (1)     | -----                                                                            |       |       |       |       |       |             |
| SARS-CoV-2 Reference Genome NC_045512.2              | (1)     | -----                                                                            |       |       |       |       |       |             |
|                                                      |         | Section 582                                                                      |       |       |       |       |       |             |
| Candidatus Carsonella ruddii strain BT chromosome... | (44738) | 44738                                                                            | 44748 | 44759 | 44770 | 44781 | 44792 | 44803 44814 |
|                                                      | (44738) | TTTAATAAAAAAAAAATAAAAAAGATTTTATCTTAAAAAAAAAAAAATGATTTAATAATAATTTTAATCATTTAATATTT |       |       |       |       |       |             |
|                                                      | (1)     | -----                                                                            |       |       |       |       |       |             |
| Candidatus Carsonella 135557 - 167442nt              | (1)     | -----                                                                            |       |       |       |       |       |             |
| SARS-CoV-2 Reference Genome NC_045512.2              | (1)     | -----                                                                            |       |       |       |       |       |             |

## SARS-CoV-2 &amp; Bakterien.apr

|                                                      |         |                                                                                  |       |       |       |       |       |       |       |
|------------------------------------------------------|---------|----------------------------------------------------------------------------------|-------|-------|-------|-------|-------|-------|-------|
| Section 583                                          |         |                                                                                  |       |       |       |       |       |       |       |
| Candidatus Carsonella ruddii strain BT chromosome... | (44815) | 44815                                                                            | 44825 | 44836 | 44847 | 44858 | 44869 | 44880 | 44891 |
| Candidatus Carsonella 135557 - 167442nt              | (44815) | TAGTAACTATTCCGGCACCAACAGTTTTTCCACCTTCTCTAATAGCAAATCTTAAACCAGCTTCTATCGCTATAGAA    |       |       |       |       |       |       |       |
| SARS-CoV-2 Reference Genome NC_045512.2              | (1)     | -----                                                                            |       |       |       |       |       |       |       |
|                                                      | (1)     | -----                                                                            |       |       |       |       |       |       |       |
| Section 584                                          |         |                                                                                  |       |       |       |       |       |       |       |
| Candidatus Carsonella ruddii strain BT chromosome... | (44892) | 44892                                                                            | 44902 | 44913 | 44924 | 44935 | 44946 | 44957 | 44968 |
| Candidatus Carsonella 135557 - 167442nt              | (44892) | GAAAGCAACGAAACATTTAATTTAATATTATCTCCAGGTAATACCATTTCACAGAAGAAGGTAGTTTACAAATACC     |       |       |       |       |       |       |       |
| SARS-CoV-2 Reference Genome NC_045512.2              | (1)     | -----                                                                            |       |       |       |       |       |       |       |
|                                                      | (1)     | -----                                                                            |       |       |       |       |       |       |       |
| Section 585                                          |         |                                                                                  |       |       |       |       |       |       |       |
| Candidatus Carsonella ruddii strain BT chromosome... | (44969) | 44969                                                                            | 44979 | 44990 | 45001 | 45012 | 45023 | 45034 | 45045 |
| Candidatus Carsonella 135557 - 167442nt              | (44969) | AGTAACATCTGTTGTTCTAAAATAAAATTGAGGTTTATATCCATTAAAAAATGGTGTGTGTCTTCCACCTTCTTCTT    |       |       |       |       |       |       |       |
| SARS-CoV-2 Reference Genome NC_045512.2              | (1)     | -----                                                                            |       |       |       |       |       |       |       |
|                                                      | (1)     | -----                                                                            |       |       |       |       |       |       |       |
| Section 586                                          |         |                                                                                  |       |       |       |       |       |       |       |
| Candidatus Carsonella ruddii strain BT chromosome... | (45046) | 45046                                                                            | 45056 | 45067 | 45078 | 45089 | 45100 | 45111 | 45122 |
| Candidatus Carsonella 135557 - 167442nt              | (45046) | TAGATAATATATATACTTCACATTCAAATAATTAGTATATGATTTTATACTTCCAAGTTTAGCAACAACCTTGACCTCTT |       |       |       |       |       |       |       |
| SARS-CoV-2 Reference Genome NC_045512.2              | (1)     | -----                                                                            |       |       |       |       |       |       |       |
|                                                      | (1)     | -----                                                                            |       |       |       |       |       |       |       |
| Section 587                                          |         |                                                                                  |       |       |       |       |       |       |       |
| Candidatus Carsonella ruddii strain BT chromosome... | (45123) | 45123                                                                            | 45133 | 45144 | 45155 | 45166 | 45177 | 45188 | 45199 |
| Candidatus Carsonella 135557 - 167442nt              | (45123) | TCTACTTCTTCTCTTTTACACTTCTTAATAAAATTCCAACATTTTCTCCAGCTATTCCTTCTTCTAAAGTTTTTTT     |       |       |       |       |       |       |       |
| SARS-CoV-2 Reference Genome NC_045512.2              | (1)     | -----                                                                            |       |       |       |       |       |       |       |
|                                                      | (1)     | -----                                                                            |       |       |       |       |       |       |       |
| Section 588                                          |         |                                                                                  |       |       |       |       |       |       |       |
| Candidatus Carsonella ruddii strain BT chromosome... | (45200) | 45200                                                                            | 45210 | 45221 | 45232 | 45243 | 45254 | 45265 | 45276 |
| Candidatus Carsonella 135557 - 167442nt              | (45200) | AAACATTTCTATACCAGTAATTGTTGTTTTTAAAGTTGGTTTTAATCCAACAATTTCTATTTCTTCACCATTTTTAA    |       |       |       |       |       |       |       |
| SARS-CoV-2 Reference Genome NC_045512.2              | (1)     | -----                                                                            |       |       |       |       |       |       |       |
|                                                      | (1)     | -----                                                                            |       |       |       |       |       |       |       |

|                                                      |         |                                                                                |       |       |       |       |       |       |       |
|------------------------------------------------------|---------|--------------------------------------------------------------------------------|-------|-------|-------|-------|-------|-------|-------|
| Section 589                                          |         |                                                                                |       |       |       |       |       |       |       |
| Candidatus Carsonella ruddii strain BT chromosome... | (45277) | 45277                                                                          | 45287 | 45298 | 45309 | 45320 | 45331 | 45342 | 45353 |
| Candidatus Carsonella 135557 - 167442nt              | (45277) | CAATACCTCTTTCAATTTTACCAGTTACAACAGTTCCTCTACCTGATATAGAAAATACATCTTCAATTGGCATTAAA  |       |       |       |       |       |       |       |
| SARS-CoV-2 Reference Genome NC_045512.2              | (1)     | -----                                                                          |       |       |       |       |       |       |       |
|                                                      | (1)     | -----                                                                          |       |       |       |       |       |       |       |
| Section 590                                          |         |                                                                                |       |       |       |       |       |       |       |
| Candidatus Carsonella ruddii strain BT chromosome... | (45354) | 45354                                                                          | 45364 | 45375 | 45386 | 45397 | 45408 | 45419 | 45430 |
| Candidatus Carsonella 135557 - 167442nt              | (45354) | AAAGGTTGATCTGTAATTCTATTTGGAACAGGAATATTTTTATCTAATACATTTAACAAATTTTTATTGATGTAGT   |       |       |       |       |       |       |       |
| SARS-CoV-2 Reference Genome NC_045512.2              | (1)     | -----                                                                          |       |       |       |       |       |       |       |
|                                                      | (1)     | -----                                                                          |       |       |       |       |       |       |       |
| Section 591                                          |         |                                                                                |       |       |       |       |       |       |       |
| Candidatus Carsonella ruddii strain BT chromosome... | (45431) | 45431                                                                          | 45441 | 45452 | 45463 | 45474 | 45485 | 45496 | 45507 |
| Candidatus Carsonella 135557 - 167442nt              | (45431) | TCCTAATTGATTATCATCTTTTCCTTCTAATGCTAATAATGCAGATCCTATTATAATTTTAACATTATTACCATCAT  |       |       |       |       |       |       |       |
| SARS-CoV-2 Reference Genome NC_045512.2              | (1)     | -----                                                                          |       |       |       |       |       |       |       |
|                                                      | (1)     | -----                                                                          |       |       |       |       |       |       |       |
| Section 592                                          |         |                                                                                |       |       |       |       |       |       |       |
| Candidatus Carsonella ruddii strain BT chromosome... | (45508) | 45508                                                                          | 45518 | 45529 | 45540 | 45551 | 45562 | 45573 | 45584 |
| Candidatus Carsonella 135557 - 167442nt              | (45508) | AATCATATTCTGATAACAATTCTCTTATCTCCATTTCAACTAAATCTAAAAGTTCTTTATCTTGAACACAATCAGCT  |       |       |       |       |       |       |       |
| SARS-CoV-2 Reference Genome NC_045512.2              | (1)     | -----                                                                          |       |       |       |       |       |       |       |
|                                                      | (1)     | -----                                                                          |       |       |       |       |       |       |       |
| Section 593                                          |         |                                                                                |       |       |       |       |       |       |       |
| Candidatus Carsonella ruddii strain BT chromosome... | (45585) | 45585                                                                          | 45595 | 45606 | 45617 | 45628 | 45639 | 45650 | 45661 |
| Candidatus Carsonella 135557 - 167442nt              | (45585) | TTATTTTAAAAAACAATTATATTAGGAACACCTACTTGTCTTGCTAAAAGAATATGCTCTCTTGTGTTGAGGCATAGG |       |       |       |       |       |       |       |
| SARS-CoV-2 Reference Genome NC_045512.2              | (1)     | -----                                                                          |       |       |       |       |       |       |       |
|                                                      | (1)     | -----                                                                          |       |       |       |       |       |       |       |
| Section 594                                          |         |                                                                                |       |       |       |       |       |       |       |
| Candidatus Carsonella ruddii strain BT chromosome... | (45662) | 45662                                                                          | 45672 | 45683 | 45694 | 45705 | 45716 | 45727 | 45738 |
| Candidatus Carsonella 135557 - 167442nt              | (45662) | ACCATCGATAGCTGAACACACTAAAATTGCTCCATCCATTTGTGCTGCTCCTGTTATCATATTTTAATATAATCAG   |       |       |       |       |       |       |       |
| SARS-CoV-2 Reference Genome NC_045512.2              | (1)     | -----                                                                          |       |       |       |       |       |       |       |
|                                                      | (1)     | -----                                                                          |       |       |       |       |       |       |       |

## SARS-CoV-2 &amp; Bakterien.apr

|                                                      |         |                                                                               |       |       |       |       |       |       |       |
|------------------------------------------------------|---------|-------------------------------------------------------------------------------|-------|-------|-------|-------|-------|-------|-------|
|                                                      |         | Section 595                                                                   |       |       |       |       |       |       |       |
| Candidatus Carsonella ruddii strain BT chromosome... | (45739) | 45739                                                                         | 45749 | 45760 | 45771 | 45782 | 45793 | 45804 | 45815 |
|                                                      | (45739) | CATGACCAGGACAATCTACATGAGCATAATGTTTAGTATCAGATTCATATTCTACATGAGAAGTAGAAATAGTTATA |       |       |       |       |       |       |       |
|                                                      | (1)     | -----                                                                         |       |       |       |       |       |       |       |
| Candidatus Carsonella 135557 - 167442nt              | (1)     | -----                                                                         |       |       |       |       |       |       |       |
| SARS-CoV-2 Reference Genome NC_045512.2              | (1)     | -----                                                                         |       |       |       |       |       |       |       |
|                                                      |         | Section 596                                                                   |       |       |       |       |       |       |       |
| Candidatus Carsonella ruddii strain BT chromosome... | (45816) | 45816                                                                         | 45826 | 45837 | 45848 | 45859 | 45870 | 45881 | 45892 |
|                                                      | (45816) | CCTCTTTCTTTTCTTCTGGAGCATTATCAATGCTATCAAAAGCTCTAATTTCTCCTCCATAAATTTCTGAAGATAC  |       |       |       |       |       |       |       |
|                                                      | (1)     | -----                                                                         |       |       |       |       |       |       |       |
| Candidatus Carsonella 135557 - 167442nt              | (1)     | -----                                                                         |       |       |       |       |       |       |       |
| SARS-CoV-2 Reference Genome NC_045512.2              | (1)     | -----                                                                         |       |       |       |       |       |       |       |
|                                                      |         | Section 597                                                                   |       |       |       |       |       |       |       |
| Candidatus Carsonella ruddii strain BT chromosome... | (45893) | 45893                                                                         | 45903 | 45914 | 45925 | 45936 | 45947 | 45958 | 45969 |
|                                                      | (45893) | TTTAGTTAAAGCAGCAGTTAAAGTTGTTTTACCATGATCAACATGTCCTATTGTTCCAACATTAATATGTATTTAT  |       |       |       |       |       |       |       |
|                                                      | (1)     | -----                                                                         |       |       |       |       |       |       |       |
| Candidatus Carsonella 135557 - 167442nt              | (1)     | -----                                                                         |       |       |       |       |       |       |       |
| SARS-CoV-2 Reference Genome NC_045512.2              | (1)     | -----                                                                         |       |       |       |       |       |       |       |
|                                                      |         | Section 598                                                                   |       |       |       |       |       |       |       |
| Candidatus Carsonella ruddii strain BT chromosome... | (45970) | 45970                                                                         | 45980 | 45991 | 46002 | 46013 | 46024 | 46035 | 46046 |
|                                                      | (45970) | TTCTATTAAATTTTATTTTAGCCATATTTTAAATTATTTTAAATTATTTTTCAACTATATAATTTGGAAGTTCATT  |       |       |       |       |       |       |       |
|                                                      | (1)     | -----                                                                         |       |       |       |       |       |       |       |
| Candidatus Carsonella 135557 - 167442nt              | (1)     | -----                                                                         |       |       |       |       |       |       |       |
| SARS-CoV-2 Reference Genome NC_045512.2              | (1)     | -----                                                                         |       |       |       |       |       |       |       |
|                                                      |         | Section 599                                                                   |       |       |       |       |       |       |       |
| Candidatus Carsonella ruddii strain BT chromosome... | (46047) | 46047                                                                         | 46057 | 46068 | 46079 | 46090 | 46101 | 46112 | 46123 |
|                                                      | (46047) | ATAATTATGAAATTCATATTATAAAGTCTGCTCTACCTTTTGTATTAGATCTTAATTCAGTAGAATAACCAATAATT |       |       |       |       |       |       |       |
|                                                      | (1)     | -----                                                                         |       |       |       |       |       |       |       |
| Candidatus Carsonella 135557 - 167442nt              | (1)     | -----                                                                         |       |       |       |       |       |       |       |
| SARS-CoV-2 Reference Genome NC_045512.2              | (1)     | -----                                                                         |       |       |       |       |       |       |       |
|                                                      |         | Section 600                                                                   |       |       |       |       |       |       |       |
| Candidatus Carsonella ruddii strain BT chromosome... | (46124) | 46124                                                                         | 46134 | 46145 | 46156 | 46167 | 46178 | 46189 | 46200 |
|                                                      | (46124) | CTCTTAAAGGTAAAAACGAATTGATAACTTTAAATTTATTATAATCTATAACATTATTTATAATACCTCTTTTTTTA |       |       |       |       |       |       |       |
|                                                      | (1)     | -----                                                                         |       |       |       |       |       |       |       |
| Candidatus Carsonella 135557 - 167442nt              | (1)     | -----                                                                         |       |       |       |       |       |       |       |
| SARS-CoV-2 Reference Genome NC_045512.2              | (1)     | -----                                                                         |       |       |       |       |       |       |       |

|                                                      |         |                                                                                |       |       |       |       |       |       |       |
|------------------------------------------------------|---------|--------------------------------------------------------------------------------|-------|-------|-------|-------|-------|-------|-------|
|                                                      |         | Section 601                                                                    |       |       |       |       |       |       |       |
| Candidatus Carsonella ruddii strain BT chromosome... | (46201) | 46201                                                                          | 46211 | 46222 | 46233 | 46244 | 46255 | 46266 | 46277 |
|                                                      | (46201) | TTAATATCTGCAACAACAATTCTTAAATATTCAGGTAAATTAACCTTCTACTTTCATAATAGGTTCAAGAACATA    |       |       |       |       |       |       |       |
|                                                      | (1)     | -----                                                                          |       |       |       |       |       |       |       |
| Candidatus Carsonella 135557 - 167442nt              | (1)     | -----                                                                          |       |       |       |       |       |       |       |
| SARS-CoV-2 Reference Genome NC_045512.2              | (1)     | -----                                                                          |       |       |       |       |       |       |       |
|                                                      |         | Section 602                                                                    |       |       |       |       |       |       |       |
| Candidatus Carsonella ruddii strain BT chromosome... | (46278) | 46278                                                                          | 46288 | 46299 | 46310 | 46321 | 46332 | 46343 | 46354 |
|                                                      | (46278) | AGAATTTGCTTTAATTAAACCTTCTTTTATTGCTATAGAAGAAGCTGCTTTAAAAGCATATTCACCTGAATCAACAG  |       |       |       |       |       |       |       |
|                                                      | (1)     | -----                                                                          |       |       |       |       |       |       |       |
| Candidatus Carsonella 135557 - 167442nt              | (1)     | -----                                                                          |       |       |       |       |       |       |       |
| SARS-CoV-2 Reference Genome NC_045512.2              | (1)     | -----                                                                          |       |       |       |       |       |       |       |
|                                                      |         | Section 603                                                                    |       |       |       |       |       |       |       |
| Candidatus Carsonella ruddii strain BT chromosome... | (46355) | 46355                                                                          | 46365 | 46376 | 46387 | 46398 | 46409 | 46420 | 46431 |
|                                                      | (46355) | AATGATAAGAACCATCTAAAACACTTATTTTAATTTTTATTACTGGATAACCGAGTATTACTCCTTGATTTAATTGT  |       |       |       |       |       |       |       |
|                                                      | (1)     | -----                                                                          |       |       |       |       |       |       |       |
| Candidatus Carsonella 135557 - 167442nt              | (1)     | -----                                                                          |       |       |       |       |       |       |       |
| SARS-CoV-2 Reference Genome NC_045512.2              | (1)     | -----                                                                          |       |       |       |       |       |       |       |
|                                                      |         | Section 604                                                                    |       |       |       |       |       |       |       |
| Candidatus Carsonella ruddii strain BT chromosome... | (46432) | 46432                                                                          | 46442 | 46453 | 46464 | 46475 | 46486 | 46497 | 46508 |
|                                                      | (46432) | TGAATTACTCCTTTTTCAATAGAAGGAATATATTCTTTTGGTATAGATCCACCAATTATTTTCAGATTTAAAAATAAA |       |       |       |       |       |       |       |
|                                                      | (1)     | -----                                                                          |       |       |       |       |       |       |       |
| Candidatus Carsonella 135557 - 167442nt              | (1)     | -----                                                                          |       |       |       |       |       |       |       |
| SARS-CoV-2 Reference Genome NC_045512.2              | (1)     | -----                                                                          |       |       |       |       |       |       |       |
|                                                      |         | Section 605                                                                    |       |       |       |       |       |       |       |
| Candidatus Carsonella ruddii strain BT chromosome... | (46509) | 46509                                                                          | 46519 | 46530 | 46541 | 46552 | 46563 | 46574 | 46585 |
|                                                      | (46509) | ATTTTCTTCTTTATCAAAAGATATTGGTTCTAATTTTAAAAAAACATGACCGTATTGTCCTTTTCCTCCAGATTGTT  |       |       |       |       |       |       |       |
|                                                      | (1)     | -----                                                                          |       |       |       |       |       |       |       |
| Candidatus Carsonella 135557 - 167442nt              | (1)     | -----                                                                          |       |       |       |       |       |       |       |
| SARS-CoV-2 Reference Genome NC_045512.2              | (1)     | -----                                                                          |       |       |       |       |       |       |       |
|                                                      |         | Section 606                                                                    |       |       |       |       |       |       |       |
| Candidatus Carsonella ruddii strain BT chromosome... | (46586) | 46586                                                                          | 46596 | 46607 | 46618 | 46629 | 46640 | 46651 | 46662 |
|                                                      | (46586) | TTATATATTTTCTTCTTGAATTATTGTTTTTTTTTATACTTTCTTTATAAGAACTTGAGGTTTGCTAATTTTAGTT   |       |       |       |       |       |       |       |
|                                                      | (1)     | -----                                                                          |       |       |       |       |       |       |       |
| Candidatus Carsonella 135557 - 167442nt              | (1)     | -----                                                                          |       |       |       |       |       |       |       |
| SARS-CoV-2 Reference Genome NC_045512.2              | (1)     | -----                                                                          |       |       |       |       |       |       |       |

## SARS-CoV-2 &amp; Bakterien.apr

|                                                      |         |                                                                                |       |       |       |       |       |       |       |
|------------------------------------------------------|---------|--------------------------------------------------------------------------------|-------|-------|-------|-------|-------|-------|-------|
| Section 607                                          |         |                                                                                |       |       |       |       |       |       |       |
| Candidatus Carsonella ruddii strain BT chromosome... | (46663) | 46663                                                                          | 46673 | 46684 | 46695 | 46706 | 46717 | 46728 | 46739 |
| Candidatus Carsonella 135557 - 167442nt              | (46663) | TTTATATTATAATCTCTATTAAATTCTATCTACAATAATTTCTAAATGTAATTCTCCCATTCCTGAAATAAGAGTTTC |       |       |       |       |       |       |       |
| SARS-CoV-2 Reference Genome NC_045512.2              | (1)     | -----                                                                          |       |       |       |       |       |       |       |
|                                                      | (1)     | -----                                                                          |       |       |       |       |       |       |       |
| Section 608                                          |         |                                                                                |       |       |       |       |       |       |       |
| Candidatus Carsonella ruddii strain BT chromosome... | (46740) | 46740                                                                          | 46750 | 46761 | 46772 | 46783 | 46794 | 46805 | 46816 |
| Candidatus Carsonella 135557 - 167442nt              | (46740) | TCCTGTTAAATTATTATTATTTAAATTAAGATGGATCTTCTTTACAAATTTTTGTATTATATTTAATAATTTTT     |       |       |       |       |       |       |       |
| SARS-CoV-2 Reference Genome NC_045512.2              | (1)     | -----                                                                          |       |       |       |       |       |       |       |
|                                                      | (1)     | -----                                                                          |       |       |       |       |       |       |       |
| Section 609                                          |         |                                                                                |       |       |       |       |       |       |       |
| Candidatus Carsonella ruddii strain BT chromosome... | (46817) | 46817                                                                          | 46827 | 46838 | 46849 | 46860 | 46871 | 46882 | 46893 |
| Candidatus Carsonella 135557 - 167442nt              | (46817) | CTTGATCATTTTTTAAATATTGGTTCTATTGAAATTGAAATTACAGGTATTGGTATATTAATTTTTTCTAATTGAAAA |       |       |       |       |       |       |       |
| SARS-CoV-2 Reference Genome NC_045512.2              | (1)     | -----                                                                          |       |       |       |       |       |       |       |
|                                                      | (1)     | -----                                                                          |       |       |       |       |       |       |       |
| Section 610                                          |         |                                                                                |       |       |       |       |       |       |       |
| Candidatus Carsonella ruddii strain BT chromosome... | (46894) | 46894                                                                          | 46904 | 46915 | 46926 | 46937 | 46948 | 46959 | 46970 |
| Candidatus Carsonella 135557 - 167442nt              | (46894) | TTTTCATTTTAAAGAACAAGTGTATCACCAGTTGTAGATTCTTTTAATCCTATTAAAACAACAATATCACCACAATT  |       |       |       |       |       |       |       |
| SARS-CoV-2 Reference Genome NC_045512.2              | (1)     | -----                                                                          |       |       |       |       |       |       |       |
|                                                      | (1)     | -----                                                                          |       |       |       |       |       |       |       |
| Section 611                                          |         |                                                                                |       |       |       |       |       |       |       |
| Candidatus Carsonella ruddii strain BT chromosome... | (46971) | 46971                                                                          | 46981 | 46992 | 47003 | 47014 | 47025 | 47036 | 47047 |
| Candidatus Carsonella 135557 - 167442nt              | (46971) | TGCTTTATTAATATCTTTTTTAGAATTTGCAACATTCTTATAATTCTAAAAATTTTTCTTTAATTTTTTTTGTAG    |       |       |       |       |       |       |       |
| SARS-CoV-2 Reference Genome NC_045512.2              | (1)     | -----                                                                          |       |       |       |       |       |       |       |
|                                                      | (1)     | -----                                                                          |       |       |       |       |       |       |       |
| Section 612                                          |         |                                                                                |       |       |       |       |       |       |       |
| Candidatus Carsonella ruddii strain BT chromosome... | (47048) | 47048                                                                          | 47058 | 47069 | 47080 | 47091 | 47102 | 47113 | 47124 |
| Candidatus Carsonella 135557 - 167442nt              | (47048) | AATTATAAATAATGTCACCACCTTTTAATTGAACCAGAATAAATCTTATAAAAGATAATGAACCTAAAAATGGATCA  |       |       |       |       |       |       |       |
| SARS-CoV-2 Reference Genome NC_045512.2              | (1)     | -----                                                                          |       |       |       |       |       |       |       |
|                                                      | (1)     | -----                                                                          |       |       |       |       |       |       |       |

|                                                      |         |                                                                                  |       |       |       |       |       |       |       |
|------------------------------------------------------|---------|----------------------------------------------------------------------------------|-------|-------|-------|-------|-------|-------|-------|
| Section 613                                          |         |                                                                                  |       |       |       |       |       |       |       |
| Candidatus Carsonella ruddii strain BT chromosome... | (47125) | 47125                                                                            | 47135 | 47146 | 47157 | 47168 | 47179 | 47190 | 47201 |
| Candidatus Carsonella 135557 - 167442nt              | (47125) | TTATGTATTTTAAACAATAAAGATAAAAAATTTTTTATTAAATAGATACATTAAAATTTAAATTATTACATCCTTTAAT  |       |       |       |       |       |       |       |
| SARS-CoV-2 Reference Genome NC_045512.2              | (1)     | -----                                                                            |       |       |       |       |       |       |       |
|                                                      | (1)     | -----                                                                            |       |       |       |       |       |       |       |
| Section 614                                          |         |                                                                                  |       |       |       |       |       |       |       |
| Candidatus Carsonella ruddii strain BT chromosome... | (47202) | 47202                                                                            | 47212 | 47223 | 47234 | 47245 | 47256 | 47267 | 47278 |
| Candidatus Carsonella 135557 - 167442nt              | (47202) | TCCTATATCAATCGGAGAAGGTAAAAAATTACAAATACTATTTAATAAATATTCTATACCTTTATTTTTTAAAGAAG    |       |       |       |       |       |       |       |
| SARS-CoV-2 Reference Genome NC_045512.2              | (1)     | -----                                                                            |       |       |       |       |       |       |       |
|                                                      | (1)     | -----                                                                            |       |       |       |       |       |       |       |
| Section 615                                          |         |                                                                                  |       |       |       |       |       |       |       |
| Candidatus Carsonella ruddii strain BT chromosome... | (47279) | 47279                                                                            | 47289 | 47300 | 47311 | 47322 | 47333 | 47344 | 47355 |
| Candidatus Carsonella 135557 - 167442nt              | (47279) | AACCACACATAATTGGTATAATTTTATTATTATAACTAAATTTCTGATAGATTTTTTAATATCTAATAAATTAAAT     |       |       |       |       |       |       |       |
| SARS-CoV-2 Reference Genome NC_045512.2              | (1)     | -----                                                                            |       |       |       |       |       |       |       |
|                                                      | (1)     | -----                                                                            |       |       |       |       |       |       |       |
| Section 616                                          |         |                                                                                  |       |       |       |       |       |       |       |
| Candidatus Carsonella ruddii strain BT chromosome... | (47356) | 47356                                                                            | 47366 | 47377 | 47388 | 47399 | 47410 | 47421 | 47432 |
| Candidatus Carsonella 135557 - 167442nt              | (47356) | TCATTATTTATATATTTTAATTAAAAATTCCTTCATCATTATTAGATAACAATTCTAACAAATAATTTCTATAAAAAATT |       |       |       |       |       |       |       |
| SARS-CoV-2 Reference Genome NC_045512.2              | (1)     | -----                                                                            |       |       |       |       |       |       |       |
|                                                      | (1)     | -----                                                                            |       |       |       |       |       |       |       |
| Section 617                                          |         |                                                                                  |       |       |       |       |       |       |       |
| Candidatus Carsonella ruddii strain BT chromosome... | (47433) | 47433                                                                            | 47443 | 47454 | 47465 | 47476 | 47487 | 47498 | 47509 |
| Candidatus Carsonella 135557 - 167442nt              | (47433) | TGCAATTTTAAATATTCATTATTTATATTTTCTATATATAAAATATTATTTTTCCAAATGTTAATTTTCATTCTA      |       |       |       |       |       |       |       |
| SARS-CoV-2 Reference Genome NC_045512.2              | (1)     | -----                                                                            |       |       |       |       |       |       |       |
|                                                      | (1)     | -----                                                                            |       |       |       |       |       |       |       |
| Section 618                                          |         |                                                                                  |       |       |       |       |       |       |       |
| Candidatus Carsonella ruddii strain BT chromosome... | (47510) | 47510                                                                            | 47520 | 47531 | 47542 | 47553 | 47564 | 47575 | 47586 |
| Candidatus Carsonella 135557 - 167442nt              | (47510) | TTATATCAATAAATCCTAAAAAATTATTTTCTGAACCTATATTAAAATTTAAAGGTGCTAAAACACAATTAAATTTT    |       |       |       |       |       |       |       |
| SARS-CoV-2 Reference Genome NC_045512.2              | (1)     | -----                                                                            |       |       |       |       |       |       |       |
|                                                      | (1)     | -----                                                                            |       |       |       |       |       |       |       |

|                                                      |         |                                                                                |       |       |       |       |       |       |       |
|------------------------------------------------------|---------|--------------------------------------------------------------------------------|-------|-------|-------|-------|-------|-------|-------|
| Section 619                                          |         |                                                                                |       |       |       |       |       |       |       |
| Candidatus Carsonella ruddii strain BT chromosome... | (47587) | 47587                                                                          | 47597 | 47608 | 47619 | 47630 | 47641 | 47652 | 47663 |
| Candidatus Carsonella 135557 - 167442nt              | (47587) | TTTTTAATATTATCTATACAATTTTTATAATTTGCTCCTATTCTATCCATTTTATTAACAAATAAAATTTTGGTAT   |       |       |       |       |       |       |       |
| SARS-CoV-2 Reference Genome NC_045512.2              | (1)     | -----                                                                          |       |       |       |       |       |       |       |
|                                                      | (1)     | -----                                                                          |       |       |       |       |       |       |       |
| Section 620                                          |         |                                                                                |       |       |       |       |       |       |       |
| Candidatus Carsonella ruddii strain BT chromosome... | (47664) | 47664                                                                          | 47674 | 47685 | 47696 | 47707 | 47718 | 47729 | 47740 |
| Candidatus Carsonella 135557 - 167442nt              | (47664) | TTTATATTTTTGAGATTGTAACCAAACGGTTTCAGTTTGTGGTTGAATTCCAGAAGATGCACATACAATTATTACAG  |       |       |       |       |       |       |       |
| SARS-CoV-2 Reference Genome NC_045512.2              | (1)     | -----                                                                          |       |       |       |       |       |       |       |
|                                                      | (1)     | -----                                                                          |       |       |       |       |       |       |       |
| Section 621                                          |         |                                                                                |       |       |       |       |       |       |       |
| Candidatus Carsonella ruddii strain BT chromosome... | (47741) | 47741                                                                          | 47751 | 47762 | 47773 | 47784 | 47795 | 47806 | 47817 |
| Candidatus Carsonella 135557 - 167442nt              | (47741) | CCCCATCTAATACTCTTAATGATCTTTCAACTTCAATAGTAAATCAACATGTCCTGGAGTATCTATTATATTTATA   |       |       |       |       |       |       |       |
| SARS-CoV-2 Reference Genome NC_045512.2              | (1)     | -----                                                                          |       |       |       |       |       |       |       |
|                                                      | (1)     | -----                                                                          |       |       |       |       |       |       |       |
| Section 622                                          |         |                                                                                |       |       |       |       |       |       |       |
| Candidatus Carsonella ruddii strain BT chromosome... | (47818) | 47818                                                                          | 47828 | 47839 | 47850 | 47861 | 47872 | 47883 | 47894 |
| Candidatus Carsonella 135557 - 167442nt              | (47818) | ATATATTGTATATCATTTATTTTCCAATATATTGTTACTGATGCTGATGTTATTGTTATTCCTCTTTCTTGTTCTTG  |       |       |       |       |       |       |       |
| SARS-CoV-2 Reference Genome NC_045512.2              | (1)     | -----                                                                          |       |       |       |       |       |       |       |
|                                                      | (1)     | -----                                                                          |       |       |       |       |       |       |       |
| Section 623                                          |         |                                                                                |       |       |       |       |       |       |       |
| Candidatus Carsonella ruddii strain BT chromosome... | (47895) | 47895                                                                          | 47905 | 47916 | 47927 | 47938 | 47949 | 47960 | 47971 |
| Candidatus Carsonella 135557 - 167442nt              | (47895) | TTTCATCCAATCAGTAACAGTATTTCCATGATGTACTTCTCCTATTTTATGTGAAACTCCTGAGTAAACAATATTC   |       |       |       |       |       |       |       |
| SARS-CoV-2 Reference Genome NC_045512.2              | (1)     | -----                                                                          |       |       |       |       |       |       |       |
|                                                      | (1)     | -----                                                                          |       |       |       |       |       |       |       |
| Section 624                                          |         |                                                                                |       |       |       |       |       |       |       |
| Candidatus Carsonella ruddii strain BT chromosome... | (47972) | 47972                                                                          | 47982 | 47993 | 48004 | 48015 | 48026 | 48037 | 48048 |
| Candidatus Carsonella 135557 - 167442nt              | (47972) | TTTCTGTAGTAGTAGTTTTTCCAGCATCTACATGTGCTATTATACCTATATTTCTTAAATATAAAATATTATTTCATA |       |       |       |       |       |       |       |
| SARS-CoV-2 Reference Genome NC_045512.2              | (1)     | -----                                                                          |       |       |       |       |       |       |       |
|                                                      | (1)     | -----                                                                          |       |       |       |       |       |       |       |



## SARS-CoV-2 &amp; Bakterien.apr

|                                                      |         |                                                                                 |       |       |       |       |       |       |       |
|------------------------------------------------------|---------|---------------------------------------------------------------------------------|-------|-------|-------|-------|-------|-------|-------|
| Section 625                                          |         |                                                                                 |       |       |       |       |       |       |       |
| Candidatus Carsonella ruddii strain BT chromosome... | (48049) | 48049                                                                           | 48059 | 48070 | 48081 | 48092 | 48103 | 48114 | 48125 |
| Candidatus Carsonella 135557 - 167442nt              | (48049) | TTTTAAAATTAGAATAAGCTTTATTTTGTTCTGAAATTTTTAAAATATTTCTTTTTGTTTTGTTGATAAAGAATTA    |       |       |       |       |       |       |       |
| SARS-CoV-2 Reference Genome NC_045512.2              | (1)     | -----                                                                           |       |       |       |       |       |       |       |
|                                                      | (1)     | -----                                                                           |       |       |       |       |       |       |       |
| Section 626                                          |         |                                                                                 |       |       |       |       |       |       |       |
| Candidatus Carsonella ruddii strain BT chromosome... | (48126) | 48126                                                                           | 48136 | 48147 | 48158 | 48169 | 48180 | 48191 | 48202 |
| Candidatus Carsonella 135557 - 167442nt              | (48126) | TTATAATAAGTATCTATCATTTACCTACTAATTTATTTTTAAAACCATTTTCATTTCTTTTTCTTGAATTAAACAC    |       |       |       |       |       |       |       |
| SARS-CoV-2 Reference Genome NC_045512.2              | (1)     | -----                                                                           |       |       |       |       |       |       |       |
|                                                      | (1)     | -----                                                                           |       |       |       |       |       |       |       |
| Section 627                                          |         |                                                                                 |       |       |       |       |       |       |       |
| Candidatus Carsonella ruddii strain BT chromosome... | (48203) | 48203                                                                           | 48213 | 48224 | 48235 | 48246 | 48257 | 48268 | 48279 |
| Candidatus Carsonella 135557 - 167442nt              | (48203) | AATCCATTTTCATTGCAAACATTAAACTTCTTTTAAATTTATTTTAAAAGGGATATTATAATTCATTCTCTCTATTT   |       |       |       |       |       |       |       |
| SARS-CoV-2 Reference Genome NC_045512.2              | (1)     | -----                                                                           |       |       |       |       |       |       |       |
|                                                      | (1)     | -----                                                                           |       |       |       |       |       |       |       |
| Section 628                                          |         |                                                                                 |       |       |       |       |       |       |       |
| Candidatus Carsonella ruddii strain BT chromosome... | (48280) | 48280                                                                           | 48290 | 48301 | 48312 | 48323 | 48334 | 48345 | 48356 |
| Candidatus Carsonella 135557 - 167442nt              | (48280) | TTCTTTTTTTTAATTTCAAATATTGGTTGAACATTTAATAATATTTTTTTAATTAAAAAAAATGGATTTTTTTTTTAAT |       |       |       |       |       |       |       |
| SARS-CoV-2 Reference Genome NC_045512.2              | (1)     | -----                                                                           |       |       |       |       |       |       |       |
|                                                      | (1)     | -----                                                                           |       |       |       |       |       |       |       |
| Section 629                                          |         |                                                                                 |       |       |       |       |       |       |       |
| Candidatus Carsonella ruddii strain BT chromosome... | (48357) | 48357                                                                           | 48367 | 48378 | 48389 | 48400 | 48411 | 48422 | 48433 |
| Candidatus Carsonella 135557 - 167442nt              | (48357) | TTAATTGTAATTAAATTTATACTATAATAAAAAATTTTTGAGCTATTTGTTTTTTTCCATTTTTCATAATATAATT    |       |       |       |       |       |       |       |
| SARS-CoV-2 Reference Genome NC_045512.2              | (1)     | -----                                                                           |       |       |       |       |       |       |       |
|                                                      | (1)     | -----                                                                           |       |       |       |       |       |       |       |
| Section 630                                          |         |                                                                                 |       |       |       |       |       |       |       |
| Candidatus Carsonella ruddii strain BT chromosome... | (48434) | 48434                                                                           | 48444 | 48455 | 48466 | 48477 | 48488 | 48499 | 48510 |
| Candidatus Carsonella 135557 - 167442nt              | (48434) | TATAAATTTAGAAAATAAATAACTTCCATATTTAATATCATTTAAATATTATTATTTTAAATATTTTTTTTCTAG     |       |       |       |       |       |       |       |
| SARS-CoV-2 Reference Genome NC_045512.2              | (1)     | -----                                                                           |       |       |       |       |       |       |       |
|                                                      | (1)     | -----                                                                           |       |       |       |       |       |       |       |

|                                                      |         |                                                                                 |       |       |       |       |       |       |       |
|------------------------------------------------------|---------|---------------------------------------------------------------------------------|-------|-------|-------|-------|-------|-------|-------|
|                                                      |         | Section 631                                                                     |       |       |       |       |       |       |       |
| Candidatus Carsonella ruddii strain BT chromosome... | (48511) | 48511                                                                           | 48521 | 48532 | 48543 | 48554 | 48565 | 48576 | 48587 |
|                                                      | (48511) | ACATTTTTTTGTTCCATATTTTGATCTAGAATTTTTTCTATTAGAAACACCTGATAAATCGTAAACATTTCTTATAGC  |       |       |       |       |       |       |       |
|                                                      | (1)     | -----                                                                           |       |       |       |       |       |       |       |
| Candidatus Carsonella 135557 - 167442nt              | (1)     | -----                                                                           |       |       |       |       |       |       |       |
| SARS-CoV-2 Reference Genome NC_045512.2              | (1)     | -----                                                                           |       |       |       |       |       |       |       |
|                                                      |         | Section 632                                                                     |       |       |       |       |       |       |       |
| Candidatus Carsonella ruddii strain BT chromosome... | (48588) | 48588                                                                           | 48598 | 48609 | 48620 | 48631 | 48642 | 48653 | 48664 |
|                                                      | (48588) | ATGATATTTTACTCCTGGTAAATCTTTAACTCTACCTCCTCTTACTAAAAATATTTGAATGTTCTTGTAATTATGTC   |       |       |       |       |       |       |       |
|                                                      | (1)     | -----                                                                           |       |       |       |       |       |       |       |
| Candidatus Carsonella 135557 - 167442nt              | (1)     | -----                                                                           |       |       |       |       |       |       |       |
| SARS-CoV-2 Reference Genome NC_045512.2              | (1)     | -----                                                                           |       |       |       |       |       |       |       |
|                                                      |         | Section 633                                                                     |       |       |       |       |       |       |       |
| Candidatus Carsonella ruddii strain BT chromosome... | (48665) | 48665                                                                           | 48675 | 48686 | 48697 | 48708 | 48719 | 48730 | 48741 |
|                                                      | (48665) | CTTCACCAGGTATGTAAACAGTTATTTTCATTTTTATTTGATAATTTTACTCTACAACTTTTCTTAAGGCAGAATTT   |       |       |       |       |       |       |       |
|                                                      | (1)     | -----                                                                           |       |       |       |       |       |       |       |
| Candidatus Carsonella 135557 - 167442nt              | (1)     | -----                                                                           |       |       |       |       |       |       |       |
| SARS-CoV-2 Reference Genome NC_045512.2              | (1)     | -----                                                                           |       |       |       |       |       |       |       |
|                                                      |         | Section 634                                                                     |       |       |       |       |       |       |       |
| Candidatus Carsonella ruddii strain BT chromosome... | (48742) | 48742                                                                           | 48752 | 48763 | 48774 | 48785 | 48796 | 48807 | 48818 |
|                                                      | (48742) | GGTTTTTTTTGGTGTAGTTGTATATACTTTAATGCATATTCCTTTTTTTTTGTGGAGAGCTTAATAAAGCTGGTGTTTT |       |       |       |       |       |       |       |
|                                                      | (1)     | -----                                                                           |       |       |       |       |       |       |       |
| Candidatus Carsonella 135557 - 167442nt              | (1)     | -----                                                                           |       |       |       |       |       |       |       |
| SARS-CoV-2 Reference Genome NC_045512.2              | (1)     | -----                                                                           |       |       |       |       |       |       |       |
|                                                      |         | Section 635                                                                     |       |       |       |       |       |       |       |
| Candidatus Carsonella ruddii strain BT chromosome... | (48819) | 48819                                                                           | 48829 | 48840 | 48851 | 48862 | 48873 | 48884 | 48895 |
|                                                      | (48819) | TATTTTTTTTTTATTTTTTTTTCTTCCTAATCTAATAATTTGATTTATAGTCATTTAATTATATAAATAATATTTAA   |       |       |       |       |       |       |       |
|                                                      | (1)     | -----                                                                           |       |       |       |       |       |       |       |
| Candidatus Carsonella 135557 - 167442nt              | (1)     | -----                                                                           |       |       |       |       |       |       |       |
| SARS-CoV-2 Reference Genome NC_045512.2              | (1)     | -----                                                                           |       |       |       |       |       |       |       |
|                                                      |         | Section 636                                                                     |       |       |       |       |       |       |       |
| Candidatus Carsonella ruddii strain BT chromosome... | (48896) | 48896                                                                           | 48906 | 48917 | 48928 | 48939 | 48950 | 48961 | 48972 |
|                                                      | (48896) | AATTTTTTCTTTTTACAACATCATTTTTTTTTGTTTTTTTTCTAAAAAAAAAATATGATTTATAAGTCCTGTACCA    |       |       |       |       |       |       |       |
|                                                      | (1)     | -----                                                                           |       |       |       |       |       |       |       |
| Candidatus Carsonella 135557 - 167442nt              | (1)     | -----                                                                           |       |       |       |       |       |       |       |
| SARS-CoV-2 Reference Genome NC_045512.2              | (1)     | -----                                                                           |       |       |       |       |       |       |       |

## SARS-CoV-2 &amp; Bakterien.apr

|                                                      |         |                                                                                 |       |       |       |       |       |       |       |
|------------------------------------------------------|---------|---------------------------------------------------------------------------------|-------|-------|-------|-------|-------|-------|-------|
|                                                      |         | Section 637                                                                     |       |       |       |       |       |       |       |
| Candidatus Carsonella ruddii strain BT chromosome... | (48973) | 48973                                                                           | 48983 | 48994 | 49005 | 49016 | 49027 | 49038 | 49049 |
|                                                      | (48973) | GCTGGTATTAATTTACCTATTACTACATTTTCTTTTAATCCTAATAAATAATCTATTCTATTTCTAATAGCAGAATC   |       |       |       |       |       |       |       |
|                                                      | (1)     | -----                                                                           |       |       |       |       |       |       |       |
| Candidatus Carsonella 135557 - 167442nt              | (1)     | -----                                                                           |       |       |       |       |       |       |       |
| SARS-CoV-2 Reference Genome NC_045512.2              | (1)     | -----                                                                           |       |       |       |       |       |       |       |
|                                                      |         | Section 638                                                                     |       |       |       |       |       |       |       |
| Candidatus Carsonella ruddii strain BT chromosome... | (49050) | 49050                                                                           | 49060 | 49071 | 49082 | 49093 | 49104 | 49115 | 49126 |
|                                                      | (49050) | AACTAAAATTCTTGTTGTTTCTTGAAATGAAGCTGCAGAAAAAAGATGTTGATTCTAATGAACTTTTGTAATAC      |       |       |       |       |       |       |       |
|                                                      | (1)     | -----                                                                           |       |       |       |       |       |       |       |
| Candidatus Carsonella 135557 - 167442nt              | (1)     | -----                                                                           |       |       |       |       |       |       |       |
| SARS-CoV-2 Reference Genome NC_045512.2              | (1)     | -----                                                                           |       |       |       |       |       |       |       |
|                                                      |         | Section 639                                                                     |       |       |       |       |       |       |       |
| Candidatus Carsonella ruddii strain BT chromosome... | (49127) | 49127                                                                           | 49137 | 49148 | 49159 | 49170 | 49181 | 49192 | 49203 |
|                                                      | (49127) | CAAATATTATTCTTTTCATATAAAGAAATTTTTTAGAATATTTTAATGTATTAATATTTTCAACTAATACATCTTCT   |       |       |       |       |       |       |       |
|                                                      | (1)     | -----                                                                           |       |       |       |       |       |       |       |
| Candidatus Carsonella 135557 - 167442nt              | (1)     | -----                                                                           |       |       |       |       |       |       |       |
| SARS-CoV-2 Reference Genome NC_045512.2              | (1)     | -----                                                                           |       |       |       |       |       |       |       |
|                                                      |         | Section 640                                                                     |       |       |       |       |       |       |       |
| Candidatus Carsonella ruddii strain BT chromosome... | (49204) | 49204                                                                           | 49214 | 49225 | 49236 | 49247 | 49258 | 49269 | 49280 |
|                                                      | (49204) | AAATATAAAATATCGTTTTGCATAAAAAACAATCACCTGAATAAAGGATTTTTACTTTTTTTGTCATTTGTTTTAA    |       |       |       |       |       |       |       |
|                                                      | (1)     | -----                                                                           |       |       |       |       |       |       |       |
| Candidatus Carsonella 135557 - 167442nt              | (1)     | -----                                                                           |       |       |       |       |       |       |       |
| SARS-CoV-2 Reference Genome NC_045512.2              | (1)     | -----                                                                           |       |       |       |       |       |       |       |
|                                                      |         | Section 641                                                                     |       |       |       |       |       |       |       |
| Candidatus Carsonella ruddii strain BT chromosome... | (49281) | 49281                                                                           | 49291 | 49302 | 49313 | 49324 | 49335 | 49346 | 49357 |
|                                                      | (49281) | AACTAATTCAATATGTTTATCATTAATAAAAAATTCCTTGTTGGTTCATAAATAATATTTATTTCTTCTACAAAAAAGT |       |       |       |       |       |       |       |
|                                                      | (1)     | -----                                                                           |       |       |       |       |       |       |       |
| Candidatus Carsonella 135557 - 167442nt              | (1)     | -----                                                                           |       |       |       |       |       |       |       |
| SARS-CoV-2 Reference Genome NC_045512.2              | (1)     | -----                                                                           |       |       |       |       |       |       |       |
|                                                      |         | Section 642                                                                     |       |       |       |       |       |       |       |
| Candidatus Carsonella ruddii strain BT chromosome... | (49358) | 49358                                                                           | 49368 | 49379 | 49390 | 49401 | 49412 | 49423 | 49434 |
|                                                      | (49358) | CTATTAAATAATCTATACCTATTATTTTAATTATATCATTTAAATCAATTTTCTTCTGAAATAATATCACCTATT     |       |       |       |       |       |       |       |
|                                                      | (1)     | -----                                                                           |       |       |       |       |       |       |       |
| Candidatus Carsonella 135557 - 167442nt              | (1)     | -----                                                                           |       |       |       |       |       |       |       |
| SARS-CoV-2 Reference Genome NC_045512.2              | (1)     | -----                                                                           |       |       |       |       |       |       |       |

## SARS-CoV-2 &amp; Bakterien.apr

|                                                      |         |                                                                                    |       |       |       |       |       |       |       |
|------------------------------------------------------|---------|------------------------------------------------------------------------------------|-------|-------|-------|-------|-------|-------|-------|
|                                                      |         | Section 643                                                                        |       |       |       |       |       |       |       |
| Candidatus Carsonella ruddii strain BT chromosome... | (49435) | 49435                                                                              | 49445 | 49456 | 49467 | 49478 | 49489 | 49500 | 49511 |
|                                                      | (49435) | TTTACATAATCTCCATTACTAATATATATTTTTGTTAAACAATCTAAAAATATATTGTTTATAAAATCCATATTTTGA     |       |       |       |       |       |       |       |
|                                                      | (1)     | -----                                                                              |       |       |       |       |       |       |       |
| Candidatus Carsonella 135557 - 167442nt              | (1)     | -----                                                                              |       |       |       |       |       |       |       |
| SARS-CoV-2 Reference Genome NC_045512.2              | (1)     | -----                                                                              |       |       |       |       |       |       |       |
|                                                      |         | Section 644                                                                        |       |       |       |       |       |       |       |
| Candidatus Carsonella ruddii strain BT chromosome... | (49512) | 49512                                                                              | 49522 | 49533 | 49544 | 49555 | 49566 | 49577 | 49588 |
|                                                      | (49512) | AGTAATAATAATATTAATTTTACAATTTTATCAAAAAAATTTGTACTATTCCATCTATTTTCAGATAATAAAGATT       |       |       |       |       |       |       |       |
|                                                      | (1)     | -----                                                                              |       |       |       |       |       |       |       |
| Candidatus Carsonella 135557 - 167442nt              | (1)     | -----                                                                              |       |       |       |       |       |       |       |
| SARS-CoV-2 Reference Genome NC_045512.2              | (1)     | -----                                                                              |       |       |       |       |       |       |       |
|                                                      |         | Section 645                                                                        |       |       |       |       |       |       |       |
| Candidatus Carsonella ruddii strain BT chromosome... | (49589) | 49589                                                                              | 49599 | 49610 | 49621 | 49632 | 49643 | 49654 | 49665 |
|                                                      | (49589) | TTTTTTTTGGAACCTCTTGCTTCAAAAAGTTCACCTTAATCTAGGTAAACCACCTATTATACTTGATTTATAAATATTT    |       |       |       |       |       |       |       |
|                                                      | (1)     | -----                                                                              |       |       |       |       |       |       |       |
| Candidatus Carsonella 135557 - 167442nt              | (1)     | -----                                                                              |       |       |       |       |       |       |       |
| SARS-CoV-2 Reference Genome NC_045512.2              | (1)     | -----                                                                              |       |       |       |       |       |       |       |
|                                                      |         | Section 646                                                                        |       |       |       |       |       |       |       |
| Candidatus Carsonella ruddii strain BT chromosome... | (49666) | 49666                                                                              | 49676 | 49687 | 49698 | 49709 | 49720 | 49731 | 49742 |
|                                                      | (49666) | TGTTTTACAATTTTTGCTATTATTGAACCTGGTAATAAAAAATCATAATTTTCCACTATAATAAAAAAATTTTAGG       |       |       |       |       |       |       |       |
|                                                      | (1)     | -----                                                                              |       |       |       |       |       |       |       |
| Candidatus Carsonella 135557 - 167442nt              | (1)     | -----                                                                              |       |       |       |       |       |       |       |
| SARS-CoV-2 Reference Genome NC_045512.2              | (1)     | -----                                                                              |       |       |       |       |       |       |       |
|                                                      |         | Section 647                                                                        |       |       |       |       |       |       |       |
| Candidatus Carsonella ruddii strain BT chromosome... | (49743) | 49743                                                                              | 49753 | 49764 | 49775 | 49786 | 49797 | 49808 | 49819 |
|                                                      | (49743) | TATACAATATTTTTTAATTTTATTTTATTTTATTTTATATAAAAAATAATACAATTTTCTAAAGATTTATAATAAAATTTAT |       |       |       |       |       |       |       |
|                                                      | (1)     | -----                                                                              |       |       |       |       |       |       |       |
| Candidatus Carsonella 135557 - 167442nt              | (1)     | -----                                                                              |       |       |       |       |       |       |       |
| SARS-CoV-2 Reference Genome NC_045512.2              | (1)     | -----                                                                              |       |       |       |       |       |       |       |
|                                                      |         | Section 648                                                                        |       |       |       |       |       |       |       |
| Candidatus Carsonella ruddii strain BT chromosome... | (49820) | 49820                                                                              | 49830 | 49841 | 49852 | 49863 | 49874 | 49885 | 49896 |
|                                                      | (49820) | TATCAGAAATACATAAAACCTTTGTTTAAATACCTTTAATTAAACATAACCTATATTTTCTGTATATATATTAAAA       |       |       |       |       |       |       |       |
|                                                      | (1)     | -----                                                                              |       |       |       |       |       |       |       |
| Candidatus Carsonella 135557 - 167442nt              | (1)     | -----                                                                              |       |       |       |       |       |       |       |
| SARS-CoV-2 Reference Genome NC_045512.2              | (1)     | -----                                                                              |       |       |       |       |       |       |       |

## SARS-CoV-2 &amp; Bakterien.apr

|                                                      |         |                                                                                 |       |       |       |       |       |       |       |
|------------------------------------------------------|---------|---------------------------------------------------------------------------------|-------|-------|-------|-------|-------|-------|-------|
|                                                      |         | Section 649                                                                     |       |       |       |       |       |       |       |
| Candidatus Carsonella ruddii strain BT chromosome... | (49897) | 49897                                                                           | 49907 | 49918 | 49929 | 49940 | 49951 | 49962 | 49973 |
|                                                      | (49897) | TCATTTTCAAATTTTAAATTTTAGTATTTTTTTTATAAAAAATACCATTCTAATAGGAATTGTATCACCATAATA     |       |       |       |       |       |       |       |
|                                                      | (1)     | -----                                                                           |       |       |       |       |       |       |       |
| Candidatus Carsonella 135557 - 167442nt              | (1)     | -----                                                                           |       |       |       |       |       |       |       |
| SARS-CoV-2 Reference Genome NC_045512.2              | (1)     | -----                                                                           |       |       |       |       |       |       |       |
|                                                      |         | Section 650                                                                     |       |       |       |       |       |       |       |
| Candidatus Carsonella ruddii strain BT chromosome... | (49974) | 49974                                                                           | 49984 | 49995 | 50006 | 50017 | 50028 | 50039 | 50050 |
|                                                      | (49974) | TAATTTATAAATTAAATTTCTTTATTAAATTTTCAATAATTAAAACTATAATTATTTAATATAATAAATTCTC       |       |       |       |       |       |       |       |
|                                                      | (1)     | -----                                                                           |       |       |       |       |       |       |       |
| Candidatus Carsonella 135557 - 167442nt              | (1)     | -----                                                                           |       |       |       |       |       |       |       |
| SARS-CoV-2 Reference Genome NC_045512.2              | (1)     | -----                                                                           |       |       |       |       |       |       |       |
|                                                      |         | Section 651                                                                     |       |       |       |       |       |       |       |
| Candidatus Carsonella ruddii strain BT chromosome... | (50051) | 50051                                                                           | 50061 | 50072 | 50083 | 50094 | 50105 | 50116 | 50127 |
|                                                      | (50051) | CATTACTATTTAACAAACATTTACTATTTTTAAAGTATACAAAACCTGATATATTTGATTTTAAATATTCAAAACCTA  |       |       |       |       |       |       |       |
|                                                      | (1)     | -----                                                                           |       |       |       |       |       |       |       |
| Candidatus Carsonella 135557 - 167442nt              | (1)     | -----                                                                           |       |       |       |       |       |       |       |
| SARS-CoV-2 Reference Genome NC_045512.2              | (1)     | -----                                                                           |       |       |       |       |       |       |       |
|                                                      |         | Section 652                                                                     |       |       |       |       |       |       |       |
| Candidatus Carsonella ruddii strain BT chromosome... | (50128) | 50128                                                                           | 50138 | 50149 | 50160 | 50171 | 50182 | 50193 | 50204 |
|                                                      | (50128) | GAAAAATAAGTAGCAACTCCACCAGTATGAAAAGTTCTCATTTGTTAATTGTGTTCTCTGGTTCTCCAATTGATTGAGC |       |       |       |       |       |       |       |
|                                                      | (1)     | -----                                                                           |       |       |       |       |       |       |       |
| Candidatus Carsonella 135557 - 167442nt              | (1)     | -----                                                                           |       |       |       |       |       |       |       |
| SARS-CoV-2 Reference Genome NC_045512.2              | (1)     | -----                                                                           |       |       |       |       |       |       |       |
|                                                      |         | Section 653                                                                     |       |       |       |       |       |       |       |
| Candidatus Carsonella ruddii strain BT chromosome... | (50205) | 50205                                                                           | 50215 | 50226 | 50237 | 50248 | 50259 | 50270 | 50281 |
|                                                      | (50205) | AGATAAACACCAATTGGAACACCAATTAAACTAATTTATTAGTACTAAATCAATTCCATAACAAAACTACATA       |       |       |       |       |       |       |       |
|                                                      | (1)     | -----                                                                           |       |       |       |       |       |       |       |
| Candidatus Carsonella 135557 - 167442nt              | (1)     | -----                                                                           |       |       |       |       |       |       |       |
| SARS-CoV-2 Reference Genome NC_045512.2              | (1)     | -----                                                                           |       |       |       |       |       |       |       |
|                                                      |         | Section 654                                                                     |       |       |       |       |       |       |       |
| Candidatus Carsonella ruddii strain BT chromosome... | (50282) | 50282                                                                           | 50292 | 50303 | 50314 | 50325 | 50336 | 50347 | 50358 |
|                                                      | (50282) | CACCTCTAGATGATATACAATGTATAACACTTCTTATAATTAAATAATCAATTTTTTTTTTAATAATTAAAAAATT    |       |       |       |       |       |       |       |
|                                                      | (1)     | -----                                                                           |       |       |       |       |       |       |       |
| Candidatus Carsonella 135557 - 167442nt              | (1)     | -----                                                                           |       |       |       |       |       |       |       |
| SARS-CoV-2 Reference Genome NC_045512.2              | (1)     | -----                                                                           |       |       |       |       |       |       |       |

|                                                      |         |                                                                               |       |       |       |       |       |       |       |
|------------------------------------------------------|---------|-------------------------------------------------------------------------------|-------|-------|-------|-------|-------|-------|-------|
|                                                      |         | Section 655                                                                   |       |       |       |       |       |       |       |
| Candidatus Carsonella ruddii strain BT chromosome... | (50359) | 50359                                                                         | 50369 | 50380 | 50391 | 50402 | 50413 | 50424 | 50435 |
|                                                      | (50359) | ATTTTATTATCTATAAAAGTATTTTCTTTTATTAATAATTATTTTATTGTAAATATTAAATAATAACTCTACC     |       |       |       |       |       |       |       |
|                                                      | (1)     | -----                                                                         |       |       |       |       |       |       |       |
| Candidatus Carsonella 135557 - 167442nt              | (1)     | -----                                                                         |       |       |       |       |       |       |       |
| SARS-CoV-2 Reference Genome NC_045512.2              | (1)     | -----                                                                         |       |       |       |       |       |       |       |
|                                                      |         | Section 656                                                                   |       |       |       |       |       |       |       |
| Candidatus Carsonella ruddii strain BT chromosome... | (50436) | 50436                                                                         | 50446 | 50457 | 50468 | 50479 | 50490 | 50501 | 50512 |
|                                                      | (50436) | AAATATTTTTTTATATAATAATAAATATTTTATAAAAAATAAATAAAATTTCTATACCAATTTTGTAAACAAT     |       |       |       |       |       |       |       |
|                                                      | (1)     | -----                                                                         |       |       |       |       |       |       |       |
| Candidatus Carsonella 135557 - 167442nt              | (1)     | -----                                                                         |       |       |       |       |       |       |       |
| SARS-CoV-2 Reference Genome NC_045512.2              | (1)     | -----                                                                         |       |       |       |       |       |       |       |
|                                                      |         | Section 657                                                                   |       |       |       |       |       |       |       |
| Candidatus Carsonella ruddii strain BT chromosome... | (50513) | 50513                                                                         | 50523 | 50534 | 50545 | 50556 | 50567 | 50578 | 50589 |
|                                                      | (50513) | CAATTTTATAAATAACAATATCTTGCATAACATCTACTAATTTTCTGGTCAAATATCCTGAATTTGCTGTTTTTAA  |       |       |       |       |       |       |       |
|                                                      | (1)     | -----                                                                         |       |       |       |       |       |       |       |
| Candidatus Carsonella 135557 - 167442nt              | (1)     | -----                                                                         |       |       |       |       |       |       |       |
| SARS-CoV-2 Reference Genome NC_045512.2              | (1)     | -----                                                                         |       |       |       |       |       |       |       |
|                                                      |         | Section 658                                                                   |       |       |       |       |       |       |       |
| Candidatus Carsonella ruddii strain BT chromosome... | (50590) | 50590                                                                         | 50600 | 50611 | 50622 | 50633 | 50644 | 50655 | 50666 |
|                                                      | (50590) | GAAGTATCTGTTAAACCTTTTCTAGCACCAAAGAAGATATAAAAAAATTTTTCATACTTAAACCATTTTTTAAATT  |       |       |       |       |       |       |       |
|                                                      | (1)     | -----                                                                         |       |       |       |       |       |       |       |
| Candidatus Carsonella 135557 - 167442nt              | (1)     | -----                                                                         |       |       |       |       |       |       |       |
| SARS-CoV-2 Reference Genome NC_045512.2              | (1)     | -----                                                                         |       |       |       |       |       |       |       |
|                                                      |         | Section 659                                                                   |       |       |       |       |       |       |       |
| Candidatus Carsonella ruddii strain BT chromosome... | (50667) | 50667                                                                         | 50677 | 50688 | 50699 | 50710 | 50721 | 50732 | 50743 |
|                                                      | (50667) | ATCTAATATAGGATCAATAATAATATCTCCATTAGATTTTGAAAAAATCCTCTAAAAGTTATTAATTGTTTAAATT  |       |       |       |       |       |       |       |
|                                                      | (1)     | -----                                                                         |       |       |       |       |       |       |       |
| Candidatus Carsonella 135557 - 167442nt              | (1)     | -----                                                                         |       |       |       |       |       |       |       |
| SARS-CoV-2 Reference Genome NC_045512.2              | (1)     | -----                                                                         |       |       |       |       |       |       |       |
|                                                      |         | Section 660                                                                   |       |       |       |       |       |       |       |
| Candidatus Carsonella ruddii strain BT chromosome... | (50744) | 50744                                                                         | 50754 | 50765 | 50776 | 50787 | 50798 | 50809 | 50820 |
|                                                      | (50744) | GTAACATACTTCCTCTTGAACCAGAATCTAACATAATAAATAAATTATTTAAATAAAAATTATTTTTTTTTTAAATT |       |       |       |       |       |       |       |
|                                                      | (1)     | -----                                                                         |       |       |       |       |       |       |       |
| Candidatus Carsonella 135557 - 167442nt              | (1)     | -----                                                                         |       |       |       |       |       |       |       |
| SARS-CoV-2 Reference Genome NC_045512.2              | (1)     | -----                                                                         |       |       |       |       |       |       |       |

|                                                      |         |                                                                                |       |       |       |       |       |       |       |
|------------------------------------------------------|---------|--------------------------------------------------------------------------------|-------|-------|-------|-------|-------|-------|-------|
| Section 661                                          |         |                                                                                |       |       |       |       |       |       |       |
| Candidatus Carsonella ruddii strain BT chromosome... | (50821) | 50821                                                                          | 50831 | 50842 | 50853 | 50864 | 50875 | 50886 | 50897 |
| Candidatus Carsonella 135557 - 167442nt              | (50821) | AATTTTTTAATTATTATAAATTTAAAAAAATTTTTCTAAAACATTAATAACATCAAATATGTTATTTTTATATTTAAT |       |       |       |       |       |       |       |
| SARS-CoV-2 Reference Genome NC_045512.2              | (1)     | -----                                                                          |       |       |       |       |       |       |       |
|                                                      | (1)     | -----                                                                          |       |       |       |       |       |       |       |
| Section 662                                          |         |                                                                                |       |       |       |       |       |       |       |
| Candidatus Carsonella ruddii strain BT chromosome... | (50898) | 50898                                                                          | 50908 | 50919 | 50930 | 50941 | 50952 | 50963 | 50974 |
| Candidatus Carsonella 135557 - 167442nt              | (50898) | TTTTTTTATTATTTTAAAAATACAATTTCTATTGTTTAATAAAATTAATCATTATAAECTTATAGAAATACCAAAAA  |       |       |       |       |       |       |       |
| SARS-CoV-2 Reference Genome NC_045512.2              | (1)     | -----                                                                          |       |       |       |       |       |       |       |
|                                                      | (1)     | -----                                                                          |       |       |       |       |       |       |       |
| Section 663                                          |         |                                                                                |       |       |       |       |       |       |       |
| Candidatus Carsonella ruddii strain BT chromosome... | (50975) | 50975                                                                          | 50985 | 50996 | 51007 | 51018 | 51029 | 51040 | 51051 |
| Candidatus Carsonella 135557 - 167442nt              | (50975) | AAGTAGAAAAATAAAAAACCTATTTTTTTAATTTTATCTAATATTTTTATAGTTTGTTCTAAACCAAAAAAATCAAAA |       |       |       |       |       |       |       |
| SARS-CoV-2 Reference Genome NC_045512.2              | (1)     | -----                                                                          |       |       |       |       |       |       |       |
|                                                      | (1)     | -----                                                                          |       |       |       |       |       |       |       |
| Section 664                                          |         |                                                                                |       |       |       |       |       |       |       |
| Candidatus Carsonella ruddii strain BT chromosome... | (51052) | 51052                                                                          | 51062 | 51073 | 51084 | 51095 | 51106 | 51117 | 51128 |
| Candidatus Carsonella 135557 - 167442nt              | (51052) | ATATATTTTATTATATAAGAAAGTTCTTTTTTTTTTAAATTTTATTTAAAAATTTTATTTTAATAATTTTTTTTTAA  |       |       |       |       |       |       |       |
| SARS-CoV-2 Reference Genome NC_045512.2              | (1)     | -----                                                                          |       |       |       |       |       |       |       |
|                                                      | (1)     | -----                                                                          |       |       |       |       |       |       |       |
| Section 665                                          |         |                                                                                |       |       |       |       |       |       |       |
| Candidatus Carsonella ruddii strain BT chromosome... | (51129) | 51129                                                                          | 51139 | 51150 | 51161 | 51172 | 51183 | 51194 | 51205 |
| Candidatus Carsonella 135557 - 167442nt              | (51129) | AAAAGAATAAAAAATTATTCTACCCATAGTAGAAAAAATTATTTTTTTTTTTTTAATTTTATATTTTTTAAATAT    |       |       |       |       |       |       |       |
| SARS-CoV-2 Reference Genome NC_045512.2              | (1)     | -----                                                                          |       |       |       |       |       |       |       |
|                                                      | (1)     | -----                                                                          |       |       |       |       |       |       |       |
| Section 666                                          |         |                                                                                |       |       |       |       |       |       |       |
| Candidatus Carsonella ruddii strain BT chromosome... | (51206) | 51206                                                                          | 51216 | 51227 | 51238 | 51249 | 51260 | 51271 | 51282 |
| Candidatus Carsonella 135557 - 167442nt              | (51206) | TTTTATTATTTTTATAATAATATAAAATTGCTTCTTTAAAAGAATTAAAAGAACAACAATTATAATTATATTATAC   |       |       |       |       |       |       |       |
| SARS-CoV-2 Reference Genome NC_045512.2              | (1)     | -----                                                                          |       |       |       |       |       |       |       |
|                                                      | (1)     | -----                                                                          |       |       |       |       |       |       |       |

|                                                      |         |                                                                                |       |       |       |       |       |       |       |
|------------------------------------------------------|---------|--------------------------------------------------------------------------------|-------|-------|-------|-------|-------|-------|-------|
| Section 667                                          |         |                                                                                |       |       |       |       |       |       |       |
| Candidatus Carsonella ruddii strain BT chromosome... | (51283) | 51283                                                                          | 51293 | 51304 | 51315 | 51326 | 51337 | 51348 | 51359 |
| Candidatus Carsonella 135557 - 167442nt              | (51283) | GTTAAACAATAAATACCCATTACTATATCTTGAGTTGGAATAATAATAGGATCTCCATTAGAAGGAGAAATAATATT  |       |       |       |       |       |       |       |
| SARS-CoV-2 Reference Genome NC_045512.2              | (1)     | -----                                                                          |       |       |       |       |       |       |       |
|                                                      | (1)     | -----                                                                          |       |       |       |       |       |       |       |
| Section 668                                          |         |                                                                                |       |       |       |       |       |       |       |
| Candidatus Carsonella ruddii strain BT chromosome... | (51360) | 51360                                                                          | 51370 | 51381 | 51392 | 51403 | 51414 | 51425 | 51436 |
| Candidatus Carsonella 135557 - 167442nt              | (51360) | ATTTATTGATAATAGTAAATAATTTGACTCCATTGAGAATTTATAGTTAAAGGTAAATGAATAGCCATTTGATCAC   |       |       |       |       |       |       |       |
| SARS-CoV-2 Reference Genome NC_045512.2              | (1)     | -----                                                                          |       |       |       |       |       |       |       |
|                                                      | (1)     | -----                                                                          |       |       |       |       |       |       |       |
| Section 669                                          |         |                                                                                |       |       |       |       |       |       |       |
| Candidatus Carsonella ruddii strain BT chromosome... | (51437) | 51437                                                                          | 51447 | 51458 | 51469 | 51480 | 51491 | 51502 | 51513 |
| Candidatus Carsonella 135557 - 167442nt              | (51437) | CATCAAAATCTGCATTATAACTTAAACATACTAAAGGATGTAATTTTATTGTTTTATCTTGAGTTAATAAGATTTTA  |       |       |       |       |       |       |       |
| SARS-CoV-2 Reference Genome NC_045512.2              | (1)     | -----                                                                          |       |       |       |       |       |       |       |
|                                                      | (1)     | -----                                                                          |       |       |       |       |       |       |       |
| Section 670                                          |         |                                                                                |       |       |       |       |       |       |       |
| Candidatus Carsonella ruddii strain BT chromosome... | (51514) | 51514                                                                          | 51524 | 51535 | 51546 | 51557 | 51568 | 51579 | 51590 |
| Candidatus Carsonella 135557 - 167442nt              | (51514) | AAAGATTGAATACCCATTCTATGTAATGTTGGAGCACGATTTAAATTTATTGTATTTTTTTTACATATATAATTTAA  |       |       |       |       |       |       |       |
| SARS-CoV-2 Reference Genome NC_045512.2              | (1)     | -----                                                                          |       |       |       |       |       |       |       |
|                                                      | (1)     | -----                                                                          |       |       |       |       |       |       |       |
| Section 671                                          |         |                                                                                |       |       |       |       |       |       |       |
| Candidatus Carsonella ruddii strain BT chromosome... | (51591) | 51591                                                                          | 51601 | 51612 | 51623 | 51634 | 51645 | 51656 | 51667 |
| Candidatus Carsonella 135557 - 167442nt              | (51591) | ATATTCTATTGATTTTTTTTTTATTTTGTTTATAATAATCATCTATAAAACCAATATTTGTAATTTGTTTATTATTTT |       |       |       |       |       |       |       |
| SARS-CoV-2 Reference Genome NC_045512.2              | (1)     | -----                                                                          |       |       |       |       |       |       |       |
|                                                      | (1)     | -----                                                                          |       |       |       |       |       |       |       |
| Section 672                                          |         |                                                                                |       |       |       |       |       |       |       |
| Candidatus Carsonella ruddii strain BT chromosome... | (51668) | 51668                                                                          | 51678 | 51689 | 51700 | 51711 | 51722 | 51733 | 51744 |
| Candidatus Carsonella 135557 - 167442nt              | (51668) | TTAATATATTATAAAGAAAAGGTTTAAATAATTCTAATAATATATAAATAGGTAATTCACACTGATAAAGTTTAAAT  |       |       |       |       |       |       |       |
| SARS-CoV-2 Reference Genome NC_045512.2              | (1)     | -----                                                                          |       |       |       |       |       |       |       |
|                                                      | (1)     | -----                                                                          |       |       |       |       |       |       |       |



|                                                      |         |                                                                                |                       |                       |                       |                       |                       |                       |                       |
|------------------------------------------------------|---------|--------------------------------------------------------------------------------|-----------------------|-----------------------|-----------------------|-----------------------|-----------------------|-----------------------|-----------------------|
|                                                      |         |                                                                                |                       |                       |                       |                       |                       |                       | Section 673           |
| Candidatus Carsonella ruddii strain BT chromosome... | (51745) | <a href="#">51745</a>                                                          | <a href="#">51755</a> | <a href="#">51766</a> | <a href="#">51777</a> | <a href="#">51788</a> | <a href="#">51799</a> | <a href="#">51810</a> | <a href="#">51821</a> |
|                                                      | (51745) | TCTGGCCCTACTGATATTACTGTTCTTCCTGAAAAATCAACTCTTTTTCCTAATAAATTTTGTCTAAATCTACCATA  |                       |                       |                       |                       |                       |                       |                       |
|                                                      | (1)     | -----                                                                          |                       |                       |                       |                       |                       |                       |                       |
|                                                      | (1)     | -----                                                                          |                       |                       |                       |                       |                       |                       |                       |
| Candidatus Carsonella 135557 - 167442nt              | (1)     |                                                                                |                       |                       |                       |                       |                       |                       |                       |
| SARS-CoV-2 Reference Genome NC_045512.2              | (1)     |                                                                                |                       |                       |                       |                       |                       |                       |                       |
|                                                      |         |                                                                                |                       |                       |                       |                       |                       |                       | Section 674           |
| Candidatus Carsonella ruddii strain BT chromosome... | (51822) | <a href="#">51822</a>                                                          | <a href="#">51832</a> | <a href="#">51843</a> | <a href="#">51854</a> | <a href="#">51865</a> | <a href="#">51876</a> | <a href="#">51887</a> | <a href="#">51898</a> |
|                                                      | (51822) | TTTTCTCTAATTGAATTAGAAAAAGATTTTAAAATTCTTTTGAAGTTGTTAAAATAGGGTTTTCAATTTTTTCAT    |                       |                       |                       |                       |                       |                       |                       |
|                                                      | (1)     | -----                                                                          |                       |                       |                       |                       |                       |                       |                       |
|                                                      | (1)     | -----                                                                          |                       |                       |                       |                       |                       |                       |                       |
| Candidatus Carsonella 135557 - 167442nt              | (1)     |                                                                                |                       |                       |                       |                       |                       |                       |                       |
| SARS-CoV-2 Reference Genome NC_045512.2              | (1)     |                                                                                |                       |                       |                       |                       |                       |                       |                       |
|                                                      |         |                                                                                |                       |                       |                       |                       |                       |                       | Section 675           |
| Candidatus Carsonella ruddii strain BT chromosome... | (51899) | <a href="#">51899</a>                                                          | <a href="#">51909</a> | <a href="#">51920</a> | <a href="#">51931</a> | <a href="#">51942</a> | <a href="#">51953</a> | <a href="#">51964</a> | <a href="#">51975</a> |
|                                                      | (51899) | TATCAAATAAAGCATTAACGATTCTTGAAGAAGAATTCTTTCATTTATAATAATTTGTTTAGGTATTCTTAATATT   |                       |                       |                       |                       |                       |                       |                       |
|                                                      | (1)     | -----                                                                          |                       |                       |                       |                       |                       |                       |                       |
|                                                      | (1)     | -----                                                                          |                       |                       |                       |                       |                       |                       |                       |
| Candidatus Carsonella 135557 - 167442nt              | (1)     |                                                                                |                       |                       |                       |                       |                       |                       |                       |
| SARS-CoV-2 Reference Genome NC_045512.2              | (1)     |                                                                                |                       |                       |                       |                       |                       |                       |                       |
|                                                      |         |                                                                                |                       |                       |                       |                       |                       |                       | Section 676           |
| Candidatus Carsonella ruddii strain BT chromosome... | (51976) | <a href="#">51976</a>                                                          | <a href="#">51986</a> | <a href="#">51997</a> | <a href="#">52008</a> | <a href="#">52019</a> | <a href="#">52030</a> | <a href="#">52041</a> | <a href="#">52052</a> |
|                                                      | (51976) | TTTAAATTTTTTAATCTTAAATTTCTATCTATTATTTTTTTATATAATTCGTTTAAATCTGAAGTTGCAAATTTTCC  |                       |                       |                       |                       |                       |                       |                       |
|                                                      | (1)     | -----                                                                          |                       |                       |                       |                       |                       |                       |                       |
|                                                      | (1)     | -----                                                                          |                       |                       |                       |                       |                       |                       |                       |
| Candidatus Carsonella 135557 - 167442nt              | (1)     |                                                                                |                       |                       |                       |                       |                       |                       |                       |
| SARS-CoV-2 Reference Genome NC_045512.2              | (1)     |                                                                                |                       |                       |                       |                       |                       |                       |                       |
|                                                      |         |                                                                                |                       |                       |                       |                       |                       |                       | Section 677           |
| Candidatus Carsonella ruddii strain BT chromosome... | (52053) | <a href="#">52053</a>                                                          | <a href="#">52063</a> | <a href="#">52074</a> | <a href="#">52085</a> | <a href="#">52096</a> | <a href="#">52107</a> | <a href="#">52118</a> | <a href="#">52129</a> |
|                                                      | (52053) | TACACTTAATGGTATTAAAGGTCTCATTTTTGGAGGAATAACAGGTAAAAATTTTAAACAAAACCAACTAGGTTTAT  |                       |                       |                       |                       |                       |                       |                       |
|                                                      | (1)     | -----                                                                          |                       |                       |                       |                       |                       |                       |                       |
|                                                      | (1)     | -----                                                                          |                       |                       |                       |                       |                       |                       |                       |
| Candidatus Carsonella 135557 - 167442nt              | (1)     |                                                                                |                       |                       |                       |                       |                       |                       |                       |
| SARS-CoV-2 Reference Genome NC_045512.2              | (1)     |                                                                                |                       |                       |                       |                       |                       |                       |                       |
|                                                      |         |                                                                                |                       |                       |                       |                       |                       |                       | Section 678           |
| Candidatus Carsonella ruddii strain BT chromosome... | (52130) | <a href="#">52130</a>                                                          | <a href="#">52140</a> | <a href="#">52151</a> | <a href="#">52162</a> | <a href="#">52173</a> | <a href="#">52184</a> | <a href="#">52195</a> | <a href="#">52206</a> |
|                                                      | (52130) | TTCCTGATAAATAAAATATATATATTTTATTTTATTTTATCTAAAAAAGAAAATAATGAATTAAAAGATTTACAATTT |                       |                       |                       |                       |                       |                       |                       |
|                                                      | (1)     | -----                                                                          |                       |                       |                       |                       |                       |                       |                       |
|                                                      | (1)     | -----                                                                          |                       |                       |                       |                       |                       |                       |                       |
| Candidatus Carsonella 135557 - 167442nt              | (1)     |                                                                                |                       |                       |                       |                       |                       |                       |                       |
| SARS-CoV-2 Reference Genome NC_045512.2              | (1)     |                                                                                |                       |                       |                       |                       |                       |                       |                       |

|                                                      |         |                                                                                |       |       |       |       |       |       |       |
|------------------------------------------------------|---------|--------------------------------------------------------------------------------|-------|-------|-------|-------|-------|-------|-------|
| Section 679                                          |         |                                                                                |       |       |       |       |       |       |       |
| Candidatus Carsonella ruddii strain BT chromosome... | (52207) | 52207                                                                          | 52217 | 52228 | 52239 | 52250 | 52261 | 52272 | 52283 |
| Candidatus Carsonella 135557 - 167442nt              | (52207) | AAAATTTTTTGTGTTTACAATTTTACAATCTAATAAAATTTTCATTATCTAATAATAATTTTAGAATTGCTTTTGTTC |       |       |       |       |       |       |       |
| SARS-CoV-2 Reference Genome NC_045512.2              | (1)     | -----                                                                          |       |       |       |       |       |       |       |
|                                                      | (1)     | -----                                                                          |       |       |       |       |       |       |       |
| Section 680                                          |         |                                                                                |       |       |       |       |       |       |       |
| Candidatus Carsonella ruddii strain BT chromosome... | (52284) | 52284                                                                          | 52294 | 52305 | 52316 | 52327 | 52338 | 52349 | 52360 |
| Candidatus Carsonella 135557 - 167442nt              | (52284) | TGATAATATATAAAAATCATTTTGTTGTTTTTTATTAAATACAACAGAATATTTTTTAAATTTTTTGTTAAAAGATT  |       |       |       |       |       |       |       |
| SARS-CoV-2 Reference Genome NC_045512.2              | (1)     | -----                                                                          |       |       |       |       |       |       |       |
|                                                      | (1)     | -----                                                                          |       |       |       |       |       |       |       |
| Section 681                                          |         |                                                                                |       |       |       |       |       |       |       |
| Candidatus Carsonella ruddii strain BT chromosome... | (52361) | 52361                                                                          | 52371 | 52382 | 52393 | 52404 | 52415 | 52426 | 52437 |
| Candidatus Carsonella 135557 - 167442nt              | (52361) | TTATAACAATATTAATTTTAAATTTAATATTTTATCTAATAATTTATAGGTGATGTTTATTATATTAGAAACATTA   |       |       |       |       |       |       |       |
| SARS-CoV-2 Reference Genome NC_045512.2              | (1)     | -----                                                                          |       |       |       |       |       |       |       |
|                                                      | (1)     | -----                                                                          |       |       |       |       |       |       |       |
| Section 682                                          |         |                                                                                |       |       |       |       |       |       |       |
| Candidatus Carsonella ruddii strain BT chromosome... | (52438) | 52438                                                                          | 52448 | 52459 | 52470 | 52481 | 52492 | 52503 | 52514 |
| Candidatus Carsonella 135557 - 167442nt              | (52438) | TTAGGTAATGTTTTTATAAACCAAATATGAAGTACAGGATAATTTAAATTTATATGCCCAAATCTATATGAAGAATG  |       |       |       |       |       |       |       |
| SARS-CoV-2 Reference Genome NC_045512.2              | (1)     | -----                                                                          |       |       |       |       |       |       |       |
|                                                      | (1)     | -----                                                                          |       |       |       |       |       |       |       |
| Section 683                                          |         |                                                                                |       |       |       |       |       |       |       |
| Candidatus Carsonella ruddii strain BT chromosome... | (52515) | 52515                                                                          | 52525 | 52536 | 52547 | 52558 | 52569 | 52580 | 52591 |
| Candidatus Carsonella 135557 - 167442nt              | (52515) | AGATTTTTTTTAAATTTAAATATTTATTTGATTTATTACAATCACATTTATATATATTACAACATATATTATAAGAAC |       |       |       |       |       |       |       |
| SARS-CoV-2 Reference Genome NC_045512.2              | (1)     | -----                                                                          |       |       |       |       |       |       |       |
|                                                      | (1)     | -----                                                                          |       |       |       |       |       |       |       |
| Section 684                                          |         |                                                                                |       |       |       |       |       |       |       |
| Candidatus Carsonella ruddii strain BT chromosome... | (52592) | 52592                                                                          | 52602 | 52613 | 52624 | 52635 | 52646 | 52657 | 52668 |
| Candidatus Carsonella 135557 - 167442nt              | (52592) | TAAAAATTTTTTAAACAAAAAAGACCACCTTAATTCAGGTTTAAATTTTTTAAATTTATATAAATAGATTTTTTAACT |       |       |       |       |       |       |       |
| SARS-CoV-2 Reference Genome NC_045512.2              | (1)     | -----                                                                          |       |       |       |       |       |       |       |
|                                                      | (1)     | -----                                                                          |       |       |       |       |       |       |       |

|                                                      |         |                                                                                |       |       |       |       |       |       |       |
|------------------------------------------------------|---------|--------------------------------------------------------------------------------|-------|-------|-------|-------|-------|-------|-------|
|                                                      |         | Section 685                                                                    |       |       |       |       |       |       |       |
| Candidatus Carsonella ruddii strain BT chromosome... | (52669) | 52669                                                                          | 52679 | 52690 | 52701 | 52712 | 52723 | 52734 | 52745 |
|                                                      | (52669) | TCTCCATAAGACCATTCTAAAATTTTTTCAGAAGAAGCAATTTTAATTGATATTTTTTAAAAAATTTTTTTTCAT    |       |       |       |       |       |       |       |
|                                                      | (1)     | -----                                                                          |       |       |       |       |       |       |       |
| Candidatus Carsonella 135557 - 167442nt              | (1)     | -----                                                                          |       |       |       |       |       |       |       |
| SARS-CoV-2 Reference Genome NC_045512.2              | (1)     | -----                                                                          |       |       |       |       |       |       |       |
|                                                      |         | Section 686                                                                    |       |       |       |       |       |       |       |
| Candidatus Carsonella ruddii strain BT chromosome... | (52746) | 52746                                                                          | 52756 | 52767 | 52778 | 52789 | 52800 | 52811 | 52822 |
|                                                      | (52746) | ATTGTTTTTATATCAAAACATAAAGCTTTTATCTCATTTAATAAAACTTGAAATGATTCTGGTATTCCAGAATCAAC  |       |       |       |       |       |       |       |
|                                                      | (1)     | -----                                                                          |       |       |       |       |       |       |       |
| Candidatus Carsonella 135557 - 167442nt              | (1)     | -----                                                                          |       |       |       |       |       |       |       |
| SARS-CoV-2 Reference Genome NC_045512.2              | (1)     | -----                                                                          |       |       |       |       |       |       |       |
|                                                      |         | Section 687                                                                    |       |       |       |       |       |       |       |
| Candidatus Carsonella ruddii strain BT chromosome... | (52823) | 52823                                                                          | 52833 | 52844 | 52855 | 52866 | 52877 | 52888 | 52899 |
|                                                      | (52823) | GTTATGTATACCTTTTCATAATATTTTTAAATAATAAAGTTCTTCCTTCTATATCATCAGATTTTACTGTTAACATTT |       |       |       |       |       |       |       |
|                                                      | (1)     | -----                                                                          |       |       |       |       |       |       |       |
| Candidatus Carsonella 135557 - 167442nt              | (1)     | -----                                                                          |       |       |       |       |       |       |       |
| SARS-CoV-2 Reference Genome NC_045512.2              | (1)     | -----                                                                          |       |       |       |       |       |       |       |
|                                                      |         | Section 688                                                                    |       |       |       |       |       |       |       |
| Candidatus Carsonella ruddii strain BT chromosome... | (52900) | 52900                                                                          | 52910 | 52921 | 52932 | 52943 | 52954 | 52965 | 52976 |
|                                                      | (52900) | CTTTTAAATATGAGAAGCACCATAAGCTTCTATAGCCCAAACCTCCATTTACCTAATCTTTGTCCTCCAAATTT     |       |       |       |       |       |       |       |
|                                                      | (1)     | -----                                                                          |       |       |       |       |       |       |       |
| Candidatus Carsonella 135557 - 167442nt              | (1)     | -----                                                                          |       |       |       |       |       |       |       |
| SARS-CoV-2 Reference Genome NC_045512.2              | (1)     | -----                                                                          |       |       |       |       |       |       |       |
|                                                      |         | Section 689                                                                    |       |       |       |       |       |       |       |
| Candidatus Carsonella ruddii strain BT chromosome... | (52977) | 52977                                                                          | 52987 | 52998 | 53009 | 53020 | 53031 | 53042 | 53053 |
|                                                      | (52977) | GATTTTCCTCCTAATGGTTGTTGTGTTATCATTGAATAAGGACCTATTGATCTAGCATAAATTTTATCTGAAACTAA  |       |       |       |       |       |       |       |
|                                                      | (1)     | -----                                                                          |       |       |       |       |       |       |       |
| Candidatus Carsonella 135557 - 167442nt              | (1)     | -----                                                                          |       |       |       |       |       |       |       |
| SARS-CoV-2 Reference Genome NC_045512.2              | (1)     | -----                                                                          |       |       |       |       |       |       |       |
|                                                      |         | Section 690                                                                    |       |       |       |       |       |       |       |
| Candidatus Carsonella ruddii strain BT chromosome... | (53054) | 53054                                                                          | 53064 | 53075 | 53086 | 53097 | 53108 | 53119 | 53130 |
|                                                      | (53054) | ATGATTTAATTTTCATAAAATATATATATCCAACATTAATAGGTTTTATATATTTAATACCAGTAATTCCATCAAATA |       |       |       |       |       |       |       |
|                                                      | (1)     | -----                                                                          |       |       |       |       |       |       |       |
| Candidatus Carsonella 135557 - 167442nt              | (1)     | -----                                                                          |       |       |       |       |       |       |       |
| SARS-CoV-2 Reference Genome NC_045512.2              | (1)     | -----                                                                          |       |       |       |       |       |       |       |

|                                                      |         |                                                                                 |       |       |       |       |       |       |       |
|------------------------------------------------------|---------|---------------------------------------------------------------------------------|-------|-------|-------|-------|-------|-------|-------|
|                                                      |         | Section 691                                                                     |       |       |       |       |       |       |       |
| Candidatus Carsonella ruddii strain BT chromosome... | (53131) | 53131                                                                           | 53141 | 53152 | 53163 | 53174 | 53185 | 53196 | 53207 |
|                                                      | (53131) | AAAAAATTTTCCGTTTTGAGAAAATCCTAATTTGTTTATTATATTTTAAATAATTAAATCGTTTATTTTATAAAAA    |       |       |       |       |       |       |       |
|                                                      | (1)     | -----                                                                           |       |       |       |       |       |       |       |
| Candidatus Carsonella 135557 - 167442nt              | (1)     | -----                                                                           |       |       |       |       |       |       |       |
| SARS-CoV-2 Reference Genome NC_045512.2              | (1)     | -----                                                                           |       |       |       |       |       |       |       |
|                                                      |         | Section 692                                                                     |       |       |       |       |       |       |       |
| Candidatus Carsonella ruddii strain BT chromosome... | (53208) | 53208                                                                           | 53218 | 53229 | 53240 | 53251 | 53262 | 53273 | 53284 |
|                                                      | (53208) | TTATGTACGCAAATTTTAAATTTTAAATTTAAAAATTTAAAAAAATTTTATAACAATCAAAATTATTTAAATTTTCAGT |       |       |       |       |       |       |       |
|                                                      | (1)     | -----                                                                           |       |       |       |       |       |       |       |
| Candidatus Carsonella 135557 - 167442nt              | (1)     | -----                                                                           |       |       |       |       |       |       |       |
| SARS-CoV-2 Reference Genome NC_045512.2              | (1)     | -----                                                                           |       |       |       |       |       |       |       |
|                                                      |         | Section 693                                                                     |       |       |       |       |       |       |       |
| Candidatus Carsonella ruddii strain BT chromosome... | (53285) | 53285                                                                           | 53295 | 53306 | 53317 | 53328 | 53339 | 53350 | 53361 |
|                                                      | (53285) | TTTTATATTTTATTAAAAATTATTTTATAAATTATTTTATAATCATTTTTAATTTGTAAAAAGAAAAATTATAAA     |       |       |       |       |       |       |       |
|                                                      | (1)     | -----                                                                           |       |       |       |       |       |       |       |
| Candidatus Carsonella 135557 - 167442nt              | (1)     | -----                                                                           |       |       |       |       |       |       |       |
| SARS-CoV-2 Reference Genome NC_045512.2              | (1)     | -----                                                                           |       |       |       |       |       |       |       |
|                                                      |         | Section 694                                                                     |       |       |       |       |       |       |       |
| Candidatus Carsonella ruddii strain BT chromosome... | (53362) | 53362                                                                           | 53372 | 53383 | 53394 | 53405 | 53416 | 53427 | 53438 |
|                                                      | (53362) | TATTAATTTTGTTAAATATATTTTTTATTTCTTTTATAGAAGAACTTAAATAAACTTCTAATAATTGACCAACATTC   |       |       |       |       |       |       |       |
|                                                      | (1)     | -----                                                                           |       |       |       |       |       |       |       |
| Candidatus Carsonella 135557 - 167442nt              | (1)     | -----                                                                           |       |       |       |       |       |       |       |
| SARS-CoV-2 Reference Genome NC_045512.2              | (1)     | -----                                                                           |       |       |       |       |       |       |       |
|                                                      |         | Section 695                                                                     |       |       |       |       |       |       |       |
| Candidatus Carsonella ruddii strain BT chromosome... | (53439) | 53439                                                                           | 53449 | 53460 | 53471 | 53482 | 53493 | 53504 | 53515 |
|                                                      | (53439) | ATTCTAGAAGGAACACCTAATGGATTTAGGATTAACCAATATGTTTTCCATATTTATCATAAGGCATATTAATTTTC   |       |       |       |       |       |       |       |
|                                                      | (1)     | -----                                                                           |       |       |       |       |       |       |       |
| Candidatus Carsonella 135557 - 167442nt              | (1)     | -----                                                                           |       |       |       |       |       |       |       |
| SARS-CoV-2 Reference Genome NC_045512.2              | (1)     | -----                                                                           |       |       |       |       |       |       |       |
|                                                      |         | Section 696                                                                     |       |       |       |       |       |       |       |
| Candidatus Carsonella ruddii strain BT chromosome... | (53516) | 53516                                                                           | 53526 | 53537 | 53548 | 53559 | 53570 | 53581 | 53592 |
|                                                      | (53516) | ATCAACAATATTTGAAATTACTCCTTTATTACCATGTCTTCCAGACATTTTATCTCCAATTTTAAATTTTTTTTAA    |       |       |       |       |       |       |       |
|                                                      | (1)     | -----                                                                           |       |       |       |       |       |       |       |
| Candidatus Carsonella 135557 - 167442nt              | (1)     | -----                                                                           |       |       |       |       |       |       |       |
| SARS-CoV-2 Reference Genome NC_045512.2              | (1)     | -----                                                                           |       |       |       |       |       |       |       |

|                                                      |         |                                                                               |       |       |       |       |       |       |       |
|------------------------------------------------------|---------|-------------------------------------------------------------------------------|-------|-------|-------|-------|-------|-------|-------|
|                                                      |         | Section 697                                                                   |       |       |       |       |       |       |       |
| Candidatus Carsonella ruddii strain BT chromosome... | (53593) | 53593                                                                         | 53603 | 53614 | 53625 | 53636 | 53647 | 53658 | 53669 |
|                                                      | (53593) | CAATAATTTTAATTTTAATAATTCTTATTATATTATTATCAAAATCATTATAATTTAAAAAATTTTTTTTTTTAATT |       |       |       |       |       |       |       |
|                                                      | (1)     | -----                                                                         |       |       |       |       |       |       |       |
| Candidatus Carsonella 135557 - 167442nt              | (1)     | -----                                                                         |       |       |       |       |       |       |       |
| SARS-CoV-2 Reference Genome NC_045512.2              | (1)     | -----                                                                         |       |       |       |       |       |       |       |
|                                                      |         | Section 698                                                                   |       |       |       |       |       |       |       |
| Candidatus Carsonella ruddii strain BT chromosome... | (53670) | 53670                                                                         | 53680 | 53691 | 53702 | 53713 | 53724 | 53735 | 53746 |
|                                                      | (53670) | ATAAATATTTTTTTTTTTTTTAATATTATTTTATTAAAAATTTTTTAAATATTTTATTATTATAATTATTTTTTTT  |       |       |       |       |       |       |       |
|                                                      | (1)     | -----                                                                         |       |       |       |       |       |       |       |
| Candidatus Carsonella 135557 - 167442nt              | (1)     | -----                                                                         |       |       |       |       |       |       |       |
| SARS-CoV-2 Reference Genome NC_045512.2              | (1)     | -----                                                                         |       |       |       |       |       |       |       |
|                                                      |         | Section 699                                                                   |       |       |       |       |       |       |       |
| Candidatus Carsonella ruddii strain BT chromosome... | (53747) | 53747                                                                         | 53757 | 53768 | 53779 | 53790 | 53801 | 53812 | 53823 |
|                                                      | (53747) | ATTTGTATATTTTAAATTTAGTAAATATTAATATTGTTATTAAAAATAAATATTTTATTATTATATAAAAACTTTTT |       |       |       |       |       |       |       |
|                                                      | (1)     | -----                                                                         |       |       |       |       |       |       |       |
| Candidatus Carsonella 135557 - 167442nt              | (1)     | -----                                                                         |       |       |       |       |       |       |       |
| SARS-CoV-2 Reference Genome NC_045512.2              | (1)     | -----                                                                         |       |       |       |       |       |       |       |
|                                                      |         | Section 700                                                                   |       |       |       |       |       |       |       |
| Candidatus Carsonella ruddii strain BT chromosome... | (53824) | 53824                                                                         | 53834 | 53845 | 53856 | 53867 | 53878 | 53889 | 53900 |
|                                                      | (53824) | TATTAAAAGAATTTTTTTTAATTATTAAAAATAAAATAAAATAAATTCATATAAAAAATTATTCATATTTTTTGTT  |       |       |       |       |       |       |       |
|                                                      | (1)     | -----                                                                         |       |       |       |       |       |       |       |
| Candidatus Carsonella 135557 - 167442nt              | (1)     | -----                                                                         |       |       |       |       |       |       |       |
| SARS-CoV-2 Reference Genome NC_045512.2              | (1)     | -----                                                                         |       |       |       |       |       |       |       |
|                                                      |         | Section 701                                                                   |       |       |       |       |       |       |       |
| Candidatus Carsonella ruddii strain BT chromosome... | (53901) | 53901                                                                         | 53911 | 53922 | 53933 | 53944 | 53955 | 53966 | 53977 |
|                                                      | (53901) | ACATATTTTAATTGTTCTAAATTTAAATTTTAAATAATATTTTTTTTAAAAAGAATAAAGTTTAAATCATCAATATT |       |       |       |       |       |       |       |
|                                                      | (1)     | -----                                                                         |       |       |       |       |       |       |       |
| Candidatus Carsonella 135557 - 167442nt              | (1)     | -----                                                                         |       |       |       |       |       |       |       |
| SARS-CoV-2 Reference Genome NC_045512.2              | (1)     | -----                                                                         |       |       |       |       |       |       |       |
|                                                      |         | Section 702                                                                   |       |       |       |       |       |       |       |
| Candidatus Carsonella ruddii strain BT chromosome... | (53978) | 53978                                                                         | 53988 | 53999 | 54010 | 54021 | 54032 | 54043 | 54054 |
|                                                      | (53978) | TAATACAGTACCATTAATATTTTTAGGTAAACATAAAGGTTGTTCAAAATAATTAAATATTATCTGAAAAACAA    |       |       |       |       |       |       |       |
|                                                      | (1)     | -----                                                                         |       |       |       |       |       |       |       |
| Candidatus Carsonella 135557 - 167442nt              | (1)     | -----                                                                         |       |       |       |       |       |       |       |
| SARS-CoV-2 Reference Genome NC_045512.2              | (1)     | -----                                                                         |       |       |       |       |       |       |       |

|                                                      |         |                                                                                 |       |       |       |       |       |       |       |
|------------------------------------------------------|---------|---------------------------------------------------------------------------------|-------|-------|-------|-------|-------|-------|-------|
| Section 703                                          |         |                                                                                 |       |       |       |       |       |       |       |
| Candidatus Carsonella ruddii strain BT chromosome... | (54055) | 54055                                                                           | 54065 | 54076 | 54087 | 54098 | 54109 | 54120 | 54131 |
| Candidatus Carsonella 135557 - 167442nt              | (54055) | TTTTAAATAATTTTTCTTCTGGTGAAAAATTACTTTTATTTTATAGGACACATTTTTCCTATTAAAACCTTCTTTTGAA |       |       |       |       |       |       |       |
| SARS-CoV-2 Reference Genome NC_045512.2              | (1)     | -----                                                                           |       |       |       |       |       |       |       |
|                                                      | (1)     | -----                                                                           |       |       |       |       |       |       |       |
| Section 704                                          |         |                                                                                 |       |       |       |       |       |       |       |
| Candidatus Carsonella ruddii strain BT chromosome... | (54132) | 54132                                                                           | 54142 | 54153 | 54164 | 54175 | 54186 | 54197 | 54208 |
| Candidatus Carsonella 135557 - 167442nt              | (54132) | TTAACAAATTCGCCAATTTTAATTATACCAGATTTAATTTTTTTATTTTAAATTTGATCTTTATTAAATACATCATT   |       |       |       |       |       |       |       |
| SARS-CoV-2 Reference Genome NC_045512.2              | (1)     | -----                                                                           |       |       |       |       |       |       |       |
|                                                      | (1)     | -----                                                                           |       |       |       |       |       |       |       |
| Section 705                                          |         |                                                                                 |       |       |       |       |       |       |       |
| Candidatus Carsonella ruddii strain BT chromosome... | (54209) | 54209                                                                           | 54219 | 54230 | 54241 | 54252 | 54263 | 54274 | 54285 |
| Candidatus Carsonella 135557 - 167442nt              | (54209) | TGATAAAATATCAAATCCATTTTCATTATATTTTAAAAACACATACATATTCATAAATATGAAAAGAAGAAAACGAAT  |       |       |       |       |       |       |       |
| SARS-CoV-2 Reference Genome NC_045512.2              | (1)     | -----                                                                           |       |       |       |       |       |       |       |
|                                                      | (1)     | -----                                                                           |       |       |       |       |       |       |       |
| Section 706                                          |         |                                                                                 |       |       |       |       |       |       |       |
| Candidatus Carsonella ruddii strain BT chromosome... | (54286) | 54286                                                                           | 54296 | 54307 | 54318 | 54329 | 54340 | 54351 | 54362 |
| Candidatus Carsonella 135557 - 167442nt              | (54286) | GTTTTTTTAAATATTTTATCAGAAATTAATATTGAATCTTCAAAATTATAACCATACCAACTCATAAAAGCTACACGA  |       |       |       |       |       |       |       |
| SARS-CoV-2 Reference Genome NC_045512.2              | (1)     | -----                                                                           |       |       |       |       |       |       |       |
|                                                      | (1)     | -----                                                                           |       |       |       |       |       |       |       |
| Section 707                                          |         |                                                                                 |       |       |       |       |       |       |       |
| Candidatus Carsonella ruddii strain BT chromosome... | (54363) | 54363                                                                           | 54373 | 54384 | 54395 | 54406 | 54417 | 54428 | 54439 |
| Candidatus Carsonella 135557 - 167442nt              | (54363) | ATATTTTTTACCTAAACTAATTTCCCCATTTTTTGTAACATTACTATCAGCTAAAATTGATCCTTTATTTATAATATT  |       |       |       |       |       |       |       |
| SARS-CoV-2 Reference Genome NC_045512.2              | (1)     | -----                                                                           |       |       |       |       |       |       |       |
|                                                      | (1)     | -----                                                                           |       |       |       |       |       |       |       |
| Section 708                                          |         |                                                                                 |       |       |       |       |       |       |       |
| Candidatus Carsonella ruddii strain BT chromosome... | (54440) | 54440                                                                           | 54450 | 54461 | 54472 | 54483 | 54494 | 54505 | 54516 |
| Candidatus Carsonella 135557 - 167442nt              | (54440) | TCCTATATTAATTTTTATTTGTTGATTTATAACAGTATTTTGATTTGTTCTTAAAAAATTTATAATTTTATATTTTT   |       |       |       |       |       |       |       |
| SARS-CoV-2 Reference Genome NC_045512.2              | (1)     | -----                                                                           |       |       |       |       |       |       |       |
|                                                      | (1)     | -----                                                                           |       |       |       |       |       |       |       |

|                                                      |         |                                                                               |       |       |       |       |       |       |       |
|------------------------------------------------------|---------|-------------------------------------------------------------------------------|-------|-------|-------|-------|-------|-------|-------|
|                                                      |         | Section 709                                                                   |       |       |       |       |       |       |       |
| Candidatus Carsonella ruddii strain BT chromosome... | (54517) | 54517                                                                         | 54527 | 54538 | 54549 | 54560 | 54571 | 54582 | 54593 |
|                                                      | (54517) | TAATTTTAAAATTATTTTAACTATAATAGAATAATTATCTAAATATAATATATATCCTTTTAAATCTGATAAAATA  |       |       |       |       |       |       |       |
|                                                      | (1)     | -----                                                                         |       |       |       |       |       |       |       |
| Candidatus Carsonella 135557 - 167442nt              | (1)     | -----                                                                         |       |       |       |       |       |       |       |
| SARS-CoV-2 Reference Genome NC_045512.2              | (1)     | -----                                                                         |       |       |       |       |       |       |       |
|                                                      |         | Section 710                                                                   |       |       |       |       |       |       |       |
| Candidatus Carsonella ruddii strain BT chromosome... | (54594) | 54594                                                                         | 54604 | 54615 | 54626 | 54637 | 54648 | 54659 | 54670 |
|                                                      | (54594) | TTGTACCTTGTGTTTAAACCCAATAATTAATTCGTTTCCTGTTCTACTATTGAATTATCTGAATTAATTAATGGAAC |       |       |       |       |       |       |       |
|                                                      | (1)     | -----                                                                         |       |       |       |       |       |       |       |
| Candidatus Carsonella 135557 - 167442nt              | (1)     | -----                                                                         |       |       |       |       |       |       |       |
| SARS-CoV-2 Reference Genome NC_045512.2              | (1)     | -----                                                                         |       |       |       |       |       |       |       |
|                                                      |         | Section 711                                                                   |       |       |       |       |       |       |       |
| Candidatus Carsonella ruddii strain BT chromosome... | (54671) | 54671                                                                         | 54681 | 54692 | 54703 | 54714 | 54725 | 54736 | 54747 |
|                                                      | (54671) | AGCTTGTCTTTGCATATTACTTCCCATTAAACATCTATTTGCGTCATTATTTGACAAAAATGGTATTAAAGATGCAC |       |       |       |       |       |       |       |
|                                                      | (1)     | -----                                                                         |       |       |       |       |       |       |       |
| Candidatus Carsonella 135557 - 167442nt              | (1)     | -----                                                                         |       |       |       |       |       |       |       |
| SARS-CoV-2 Reference Genome NC_045512.2              | (1)     | -----                                                                         |       |       |       |       |       |       |       |
|                                                      |         | Section 712                                                                   |       |       |       |       |       |       |       |
| Candidatus Carsonella ruddii strain BT chromosome... | (54748) | 54748                                                                         | 54758 | 54769 | 54780 | 54791 | 54802 | 54813 | 54824 |
|                                                      | (54748) | CCAAAGAAACAATTTGATCTCCTGAAATTTCAATTAAATCAATAAAAAAAAAATTTTTTTTATTATAATTATTTTTT |       |       |       |       |       |       |       |
|                                                      | (1)     | -----                                                                         |       |       |       |       |       |       |       |
| Candidatus Carsonella 135557 - 167442nt              | (1)     | -----                                                                         |       |       |       |       |       |       |       |
| SARS-CoV-2 Reference Genome NC_045512.2              | (1)     | -----                                                                         |       |       |       |       |       |       |       |
|                                                      |         | Section 713                                                                   |       |       |       |       |       |       |       |
| Candidatus Carsonella ruddii strain BT chromosome... | (54825) | 54825                                                                         | 54835 | 54846 | 54857 | 54868 | 54879 | 54890 | 54901 |
|                                                      | (54825) | TTTCTAGTTTCTAAAAAAGGAAATTTAAAAATTTCTCCATATATTGTTTTAACAGTTGATAAATAATTTGTTATTAT |       |       |       |       |       |       |       |
|                                                      | (1)     | -----                                                                         |       |       |       |       |       |       |       |
| Candidatus Carsonella 135557 - 167442nt              | (1)     | -----                                                                         |       |       |       |       |       |       |       |
| SARS-CoV-2 Reference Genome NC_045512.2              | (1)     | -----                                                                         |       |       |       |       |       |       |       |
|                                                      |         | Section 714                                                                   |       |       |       |       |       |       |       |
| Candidatus Carsonella ruddii strain BT chromosome... | (54902) | 54902                                                                         | 54912 | 54923 | 54934 | 54945 | 54956 | 54967 | 54978 |
|                                                      | (54902) | TTTTAATTTTCTTTTTTATAATCTAAAAAATAACACCAATAATATTTCTATATATGATATTTTATATATTGTTG    |       |       |       |       |       |       |       |
|                                                      | (1)     | -----                                                                         |       |       |       |       |       |       |       |
| Candidatus Carsonella 135557 - 167442nt              | (1)     | -----                                                                         |       |       |       |       |       |       |       |
| SARS-CoV-2 Reference Genome NC_045512.2              | (1)     | -----                                                                         |       |       |       |       |       |       |       |

## SARS-CoV-2 &amp; Bakterien.apr

|                                                      |         |                                                                                 |       |       |       |       |       |       |       |
|------------------------------------------------------|---------|---------------------------------------------------------------------------------|-------|-------|-------|-------|-------|-------|-------|
|                                                      |         | Section 715                                                                     |       |       |       |       |       |       |       |
| Candidatus Carsonella ruddii strain BT chromosome... | (54979) | 54979                                                                           | 54989 | 55000 | 55011 | 55022 | 55033 | 55044 | 55055 |
|                                                      | (54979) | AAATATAATTATATTTATTAATTTTTGAATAAAATGAAAAAGAAATTAATTAATCCAATATTATGTCCTTCTGGTGTA  |       |       |       |       |       |       |       |
|                                                      | (1)     | -----                                                                           |       |       |       |       |       |       |       |
| Candidatus Carsonella 135557 - 167442nt              | (1)     | -----                                                                           |       |       |       |       |       |       |       |
| SARS-CoV-2 Reference Genome NC_045512.2              | (1)     | -----                                                                           |       |       |       |       |       |       |       |
|                                                      |         | Section 716                                                                     |       |       |       |       |       |       |       |
| Candidatus Carsonella ruddii strain BT chromosome... | (55056) | 55056                                                                           | 55066 | 55077 | 55088 | 55099 | 55110 | 55121 | 55132 |
|                                                      | (55056) | TCTATTGGACAAATTTTGCAATAATGAGAAATATGTAAATCTCTAATATCAAAACCACAATTTTCTTTTTTTATATT   |       |       |       |       |       |       |       |
|                                                      | (1)     | -----                                                                           |       |       |       |       |       |       |       |
| Candidatus Carsonella 135557 - 167442nt              | (1)     | -----                                                                           |       |       |       |       |       |       |       |
| SARS-CoV-2 Reference Genome NC_045512.2              | (1)     | -----                                                                           |       |       |       |       |       |       |       |
|                                                      |         | Section 717                                                                     |       |       |       |       |       |       |       |
| Candidatus Carsonella ruddii strain BT chromosome... | (55133) | 55133                                                                           | 55143 | 55154 | 55165 | 55176 | 55187 | 55198 | 55209 |
|                                                      | (55133) | ATTACCTATAAGAGAAATTTTACGTAAATGTGAAATTTCTGATAAAGGATTATTTTGATCTAAAAATTGAGATAATT   |       |       |       |       |       |       |       |
|                                                      | (1)     | -----                                                                           |       |       |       |       |       |       |       |
| Candidatus Carsonella 135557 - 167442nt              | (1)     | -----                                                                           |       |       |       |       |       |       |       |
| SARS-CoV-2 Reference Genome NC_045512.2              | (1)     | -----                                                                           |       |       |       |       |       |       |       |
|                                                      |         | Section 718                                                                     |       |       |       |       |       |       |       |
| Candidatus Carsonella ruddii strain BT chromosome... | (55210) | 55210                                                                           | 55220 | 55231 | 55242 | 55253 | 55264 | 55275 | 55286 |
|                                                      | (55210) | CATTATTACAAAAATAATCCTTTAATTCTATTGTAATAATATTTTTTCTATAATATATTCTAAATCATTAAATATTG   |       |       |       |       |       |       |       |
|                                                      | (1)     | -----                                                                           |       |       |       |       |       |       |       |
| Candidatus Carsonella 135557 - 167442nt              | (1)     | -----                                                                           |       |       |       |       |       |       |       |
| SARS-CoV-2 Reference Genome NC_045512.2              | (1)     | -----                                                                           |       |       |       |       |       |       |       |
|                                                      |         | Section 719                                                                     |       |       |       |       |       |       |       |
| Candidatus Carsonella ruddii strain BT chromosome... | (55287) | 55287                                                                           | 55297 | 55308 | 55319 | 55330 | 55341 | 55352 | 55363 |
|                                                      | (55287) | TTAAAATTTTAACTTTAAATTTAATATTTTAAATAATTTTATTAAACTTTTTTCAAATTTTAAAGATAATAATTT     |       |       |       |       |       |       |       |
|                                                      | (1)     | -----                                                                           |       |       |       |       |       |       |       |
| Candidatus Carsonella 135557 - 167442nt              | (1)     | -----                                                                           |       |       |       |       |       |       |       |
| SARS-CoV-2 Reference Genome NC_045512.2              | (1)     | -----                                                                           |       |       |       |       |       |       |       |
|                                                      |         | Section 720                                                                     |       |       |       |       |       |       |       |
| Candidatus Carsonella ruddii strain BT chromosome... | (55364) | 55364                                                                           | 55374 | 55385 | 55396 | 55407 | 55418 | 55429 | 55440 |
|                                                      | (55364) | ACCAGAACTATAAATATATTTATTTTCTAAACTTTCAAAAAGAAATCATTTATAATATCAAATTTTAAAAATTTTAAAA |       |       |       |       |       |       |       |
|                                                      | (1)     | -----                                                                           |       |       |       |       |       |       |       |
| Candidatus Carsonella 135557 - 167442nt              | (1)     | -----                                                                           |       |       |       |       |       |       |       |
| SARS-CoV-2 Reference Genome NC_045512.2              | (1)     | -----                                                                           |       |       |       |       |       |       |       |



|                                                      |         |                                                                               |       |       |       |       |       |       |       |
|------------------------------------------------------|---------|-------------------------------------------------------------------------------|-------|-------|-------|-------|-------|-------|-------|
|                                                      |         | Section 721                                                                   |       |       |       |       |       |       |       |
| Candidatus Carsonella ruddii strain BT chromosome... | (55441) | 55441                                                                         | 55451 | 55462 | 55473 | 55484 | 55495 | 55506 | 55517 |
|                                                      | (55441) | ATTTTTTTATAATTTCAAATATAGTTAAAATATTAATATTATTGTTTTTTTCATATAAAAATTTTTTTACTCTTTTA |       |       |       |       |       |       |       |
|                                                      | (1)     | -----                                                                         |       |       |       |       |       |       |       |
| Candidatus Carsonella 135557 - 167442nt              | (1)     | -----                                                                         |       |       |       |       |       |       |       |
| SARS-CoV-2 Reference Genome NC_045512.2              | (1)     | -----                                                                         |       |       |       |       |       |       |       |
|                                                      |         | Section 722                                                                   |       |       |       |       |       |       |       |
| Candidatus Carsonella ruddii strain BT chromosome... | (55518) | 55518                                                                         | 55528 | 55539 | 55550 | 55561 | 55572 | 55583 | 55594 |
|                                                      | (55518) | AAACCTATTTCTAAAAAATTATAATTTTTTTTTTAAATATTTTTTTTAAAAAATTAAAAATTTTCCTTTTTTATT   |       |       |       |       |       |       |       |
|                                                      | (1)     | -----                                                                         |       |       |       |       |       |       |       |
| Candidatus Carsonella 135557 - 167442nt              | (1)     | -----                                                                         |       |       |       |       |       |       |       |
| SARS-CoV-2 Reference Genome NC_045512.2              | (1)     | -----                                                                         |       |       |       |       |       |       |       |
|                                                      |         | Section 723                                                                   |       |       |       |       |       |       |       |
| Candidatus Carsonella ruddii strain BT chromosome... | (55595) | 55595                                                                         | 55605 | 55616 | 55627 | 55638 | 55649 | 55660 | 55671 |
|                                                      | (55595) | TAAAAAATTAGTTTCTTCAAATTAATTTTATAATTTTTGTATATTTTATTATACTAATATTTTCTATTTCTTTTT   |       |       |       |       |       |       |       |
|                                                      | (1)     | -----                                                                         |       |       |       |       |       |       |       |
| Candidatus Carsonella 135557 - 167442nt              | (1)     | -----                                                                         |       |       |       |       |       |       |       |
| SARS-CoV-2 Reference Genome NC_045512.2              | (1)     | -----                                                                         |       |       |       |       |       |       |       |
|                                                      |         | Section 724                                                                   |       |       |       |       |       |       |       |
| Candidatus Carsonella ruddii strain BT chromosome... | (55672) | 55672                                                                         | 55682 | 55693 | 55704 | 55715 | 55726 | 55737 | 55748 |
|                                                      | (55672) | TAAAAATTATTATTATTAAAAATAAAATTTTTTTAAATAAAATAAAATCAATTATTTTATTATTAAATAATTTAAAT |       |       |       |       |       |       |       |
|                                                      | (1)     | -----                                                                         |       |       |       |       |       |       |       |
| Candidatus Carsonella 135557 - 167442nt              | (1)     | -----                                                                         |       |       |       |       |       |       |       |
| SARS-CoV-2 Reference Genome NC_045512.2              | (1)     | -----                                                                         |       |       |       |       |       |       |       |
|                                                      |         | Section 725                                                                   |       |       |       |       |       |       |       |
| Candidatus Carsonella ruddii strain BT chromosome... | (55749) | 55749                                                                         | 55759 | 55770 | 55781 | 55792 | 55803 | 55814 | 55825 |
|                                                      | (55749) | TTTTTAAAAAATTATTTTTTAGAAAAATATATTCTCCTAAATAAAAAATTTTAAATTTTTTAAATGAAAAACAAAA  |       |       |       |       |       |       |       |
|                                                      | (1)     | -----                                                                         |       |       |       |       |       |       |       |
| Candidatus Carsonella 135557 - 167442nt              | (1)     | -----                                                                         |       |       |       |       |       |       |       |
| SARS-CoV-2 Reference Genome NC_045512.2              | (1)     | -----                                                                         |       |       |       |       |       |       |       |
|                                                      |         | Section 726                                                                   |       |       |       |       |       |       |       |
| Candidatus Carsonella ruddii strain BT chromosome... | (55826) | 55826                                                                         | 55836 | 55847 | 55858 | 55869 | 55880 | 55891 | 55902 |
|                                                      | (55826) | ATATTTTTTATATTTTTTTTTTAAAAAAATTTTTTTATTTATTAAAAAAATTTTTTTTTTTTGCCTTTTATTATTT  |       |       |       |       |       |       |       |
|                                                      | (1)     | -----                                                                         |       |       |       |       |       |       |       |
| Candidatus Carsonella 135557 - 167442nt              | (1)     | -----                                                                         |       |       |       |       |       |       |       |
| SARS-CoV-2 Reference Genome NC_045512.2              | (1)     | -----                                                                         |       |       |       |       |       |       |       |

## SARS-CoV-2 &amp; Bakterien.apr

|                                                      |         |                                                                               |       |       |       |       |       |       |       |
|------------------------------------------------------|---------|-------------------------------------------------------------------------------|-------|-------|-------|-------|-------|-------|-------|
|                                                      |         | Section 727                                                                   |       |       |       |       |       |       |       |
| Candidatus Carsonella ruddii strain BT chromosome... | (55903) | 55903                                                                         | 55913 | 55924 | 55935 | 55946 | 55957 | 55968 | 55979 |
|                                                      | (55903) | TTAATTTTATTTTAAAAAAAAAATATTTAAAAAAAAAATTTTGTTTAAACCTAAACTAATTAATAAATTTTAAACA  |       |       |       |       |       |       |       |
|                                                      | (1)     | -----                                                                         |       |       |       |       |       |       |       |
| Candidatus Carsonella 135557 - 167442nt              | (1)     | -----                                                                         |       |       |       |       |       |       |       |
| SARS-CoV-2 Reference Genome NC_045512.2              | (1)     | -----                                                                         |       |       |       |       |       |       |       |
|                                                      |         | Section 728                                                                   |       |       |       |       |       |       |       |
| Candidatus Carsonella ruddii strain BT chromosome... | (55980) | 55980                                                                         | 55990 | 56001 | 56012 | 56023 | 56034 | 56045 | 56056 |
|                                                      | (55980) | ATAAATGATATTTTATCAAAAAAAAAAATAAATAATATTATTATTATTAATAATTTCTATCCAATTTCCATAATA   |       |       |       |       |       |       |       |
|                                                      | (1)     | -----                                                                         |       |       |       |       |       |       |       |
| Candidatus Carsonella 135557 - 167442nt              | (1)     | -----                                                                         |       |       |       |       |       |       |       |
| SARS-CoV-2 Reference Genome NC_045512.2              | (1)     | -----                                                                         |       |       |       |       |       |       |       |
|                                                      |         | Section 729                                                                   |       |       |       |       |       |       |       |
| Candidatus Carsonella ruddii strain BT chromosome... | (56057) | 56057                                                                         | 56067 | 56078 | 56089 | 56100 | 56111 | 56122 | 56133 |
|                                                      | (56057) | AGGAATAATTTTGCAATATTTATATTTTCTATAAAAAAAAAATATACCATGTGCTTTATTAAATTGAGAAATTAAAA |       |       |       |       |       |       |       |
|                                                      | (1)     | -----                                                                         |       |       |       |       |       |       |       |
| Candidatus Carsonella 135557 - 167442nt              | (1)     | -----                                                                         |       |       |       |       |       |       |       |
| SARS-CoV-2 Reference Genome NC_045512.2              | (1)     | -----                                                                         |       |       |       |       |       |       |       |
|                                                      |         | Section 730                                                                   |       |       |       |       |       |       |       |
| Candidatus Carsonella ruddii strain BT chromosome... | (56134) | 56134                                                                         | 56144 | 56155 | 56166 | 56177 | 56188 | 56199 | 56210 |
|                                                      | (56134) | CTCTGTTTGTACCATTAATAATAAAATTACCTTTATTAGTTATATACGGAATATAACCTAATTCAAATTTTAAATA  |       |       |       |       |       |       |       |
|                                                      | (1)     | -----                                                                         |       |       |       |       |       |       |       |
| Candidatus Carsonella 135557 - 167442nt              | (1)     | -----                                                                         |       |       |       |       |       |       |       |
| SARS-CoV-2 Reference Genome NC_045512.2              | (1)     | -----                                                                         |       |       |       |       |       |       |       |
|                                                      |         | Section 731                                                                   |       |       |       |       |       |       |       |
| Candidatus Carsonella ruddii strain BT chromosome... | (56211) | 56211                                                                         | 56221 | 56232 | 56243 | 56254 | 56265 | 56276 | 56287 |
|                                                      | (56211) | AAAATTAAATTTTATTAAATTATATATATTTTAAATAAACATAAATAATAGTATAAAAGTGAATATTTTTTTTTTT  |       |       |       |       |       |       |       |
|                                                      | (1)     | -----                                                                         |       |       |       |       |       |       |       |
| Candidatus Carsonella 135557 - 167442nt              | (1)     | -----                                                                         |       |       |       |       |       |       |       |
| SARS-CoV-2 Reference Genome NC_045512.2              | (1)     | -----                                                                         |       |       |       |       |       |       |       |
|                                                      |         | Section 732                                                                   |       |       |       |       |       |       |       |
| Candidatus Carsonella ruddii strain BT chromosome... | (56288) | 56288                                                                         | 56298 | 56309 | 56320 | 56331 | 56342 | 56353 | 56364 |
|                                                      | (56288) | ACAATATTCTTCATTAAAAAATGGTTTTTAAATAATTAATTTAAAAAATTTTAAAAAACGTTTTTTTTTATATTAA  |       |       |       |       |       |       |       |
|                                                      | (1)     | -----                                                                         |       |       |       |       |       |       |       |
| Candidatus Carsonella 135557 - 167442nt              | (1)     | -----                                                                         |       |       |       |       |       |       |       |
| SARS-CoV-2 Reference Genome NC_045512.2              | (1)     | -----                                                                         |       |       |       |       |       |       |       |

|                                                      |         |                                                                               |       |       |       |       |       |       |       |
|------------------------------------------------------|---------|-------------------------------------------------------------------------------|-------|-------|-------|-------|-------|-------|-------|
|                                                      |         | Section 733                                                                   |       |       |       |       |       |       |       |
| Candidatus Carsonella ruddii strain BT chromosome... | (56365) | 56365                                                                         | 56375 | 56386 | 56397 | 56408 | 56419 | 56430 | 56441 |
|                                                      | (56365) | ATAAAGGAAAGTGTTTTTTTAAATATATTTTAACTAAAAATTTTGATTTTGAATTTAATAAATTATTATAAGAA    |       |       |       |       |       |       |       |
|                                                      | (1)     | -----                                                                         |       |       |       |       |       |       |       |
| Candidatus Carsonella 135557 - 167442nt              | (1)     | -----                                                                         |       |       |       |       |       |       |       |
| SARS-CoV-2 Reference Genome NC_045512.2              | (1)     | -----                                                                         |       |       |       |       |       |       |       |
|                                                      |         | Section 734                                                                   |       |       |       |       |       |       |       |
| Candidatus Carsonella ruddii strain BT chromosome... | (56442) | 56442                                                                         | 56452 | 56463 | 56474 | 56485 | 56496 | 56507 | 56518 |
|                                                      | (56442) | TTTATTTGTATATGATTAAATATGGTTTATAACATTTATGAATAAATTTTTTTTAGATAAACAATATCTATTAAA   |       |       |       |       |       |       |       |
|                                                      | (1)     | -----                                                                         |       |       |       |       |       |       |       |
| Candidatus Carsonella 135557 - 167442nt              | (1)     | -----                                                                         |       |       |       |       |       |       |       |
| SARS-CoV-2 Reference Genome NC_045512.2              | (1)     | -----                                                                         |       |       |       |       |       |       |       |
|                                                      |         | Section 735                                                                   |       |       |       |       |       |       |       |
| Candidatus Carsonella ruddii strain BT chromosome... | (56519) | 56519                                                                         | 56529 | 56540 | 56551 | 56562 | 56573 | 56584 | 56595 |
|                                                      | (56519) | ATTAATAAACGAAATCATTTAATTTCAACTTTCTCCTACACTATTAATTTTTTAAACAATTCATCACATTGTTTC   |       |       |       |       |       |       |       |
|                                                      | (1)     | -----                                                                         |       |       |       |       |       |       |       |
| Candidatus Carsonella 135557 - 167442nt              | (1)     | -----                                                                         |       |       |       |       |       |       |       |
| SARS-CoV-2 Reference Genome NC_045512.2              | (1)     | -----                                                                         |       |       |       |       |       |       |       |
|                                                      |         | Section 736                                                                   |       |       |       |       |       |       |       |
| Candidatus Carsonella ruddii strain BT chromosome... | (56596) | 56596                                                                         | 56606 | 56617 | 56628 | 56639 | 56650 | 56661 | 56672 |
|                                                      | (56596) | TTTATCTAAACCACCTTTTTATTAAAGAATTTTTTTTTTCTACTAAATCTTTTGATTCTTTTAACTTAAATTAGTAA |       |       |       |       |       |       |       |
|                                                      | (1)     | -----                                                                         |       |       |       |       |       |       |       |
| Candidatus Carsonella 135557 - 167442nt              | (1)     | -----                                                                         |       |       |       |       |       |       |       |
| SARS-CoV-2 Reference Genome NC_045512.2              | (1)     | -----                                                                         |       |       |       |       |       |       |       |
|                                                      |         | Section 737                                                                   |       |       |       |       |       |       |       |
| Candidatus Carsonella ruddii strain BT chromosome... | (56673) | 56673                                                                         | 56683 | 56694 | 56705 | 56716 | 56727 | 56738 | 56749 |
|                                                      | (56673) | TTTCTTTAATAACTTTTATTAAATTAATTTTTTTATCTCCTATTTCTTTTAAAAAATATCAAATTTATTTTTTTTT  |       |       |       |       |       |       |       |
|                                                      | (1)     | -----                                                                         |       |       |       |       |       |       |       |
| Candidatus Carsonella 135557 - 167442nt              | (1)     | -----                                                                         |       |       |       |       |       |       |       |
| SARS-CoV-2 Reference Genome NC_045512.2              | (1)     | -----                                                                         |       |       |       |       |       |       |       |
|                                                      |         | Section 738                                                                   |       |       |       |       |       |       |       |
| Candidatus Carsonella ruddii strain BT chromosome... | (56750) | 56750                                                                         | 56760 | 56771 | 56782 | 56793 | 56804 | 56815 | 56826 |
|                                                      | (56750) | ATATTTTCAACAATATTTTCATTTTTTAAATTAAATTTTGTTCATTTTAATTATAAGATCACTTAATTCTAACAA   |       |       |       |       |       |       |       |
|                                                      | (1)     | -----                                                                         |       |       |       |       |       |       |       |
| Candidatus Carsonella 135557 - 167442nt              | (1)     | -----                                                                         |       |       |       |       |       |       |       |
| SARS-CoV-2 Reference Genome NC_045512.2              | (1)     | -----                                                                         |       |       |       |       |       |       |       |

|                                                      |         |                                                                                 |       |       |       |       |       |       |       |
|------------------------------------------------------|---------|---------------------------------------------------------------------------------|-------|-------|-------|-------|-------|-------|-------|
|                                                      |         | Section 739                                                                     |       |       |       |       |       |       |       |
| Candidatus Carsonella ruddii strain BT chromosome... | (56827) | 56827                                                                           | 56837 | 56848 | 56859 | 56870 | 56881 | 56892 | 56903 |
|                                                      | (56827) | ATTTAATTTTGAAATTAAATCTAAAATATTTTCAATTATTATATTTTCATATTTGTTTAAATAATTTTATTAATCT    |       |       |       |       |       |       |       |
|                                                      | (1)     | -----                                                                           |       |       |       |       |       |       |       |
| Candidatus Carsonella 135557 - 167442nt              | (1)     | -----                                                                           |       |       |       |       |       |       |       |
| SARS-CoV-2 Reference Genome NC_045512.2              | (1)     | -----                                                                           |       |       |       |       |       |       |       |
|                                                      |         | Section 740                                                                     |       |       |       |       |       |       |       |
| Candidatus Carsonella ruddii strain BT chromosome... | (56904) | 56904                                                                           | 56914 | 56925 | 56936 | 56947 | 56958 | 56969 | 56980 |
|                                                      | (56904) | AAAAAATTTTAATTTTAAAAAATTAATAAATTCGAAATTAAATTTCTTTTGATAAATTTGAGAATTCCTTAATAG     |       |       |       |       |       |       |       |
|                                                      | (1)     | -----                                                                           |       |       |       |       |       |       |       |
| Candidatus Carsonella 135557 - 167442nt              | (1)     | -----                                                                           |       |       |       |       |       |       |       |
| SARS-CoV-2 Reference Genome NC_045512.2              | (1)     | -----                                                                           |       |       |       |       |       |       |       |
|                                                      |         | Section 741                                                                     |       |       |       |       |       |       |       |
| Candidatus Carsonella ruddii strain BT chromosome... | (56981) | 56981                                                                           | 56991 | 57002 | 57013 | 57024 | 57035 | 57046 | 57057 |
|                                                      | (56981) | GTATTTTTTTAATAAAACAATTATTAGAAAAATAAAAAAATGGTTTTTTTCTAAAAAATTTAAATATTAATTAAT     |       |       |       |       |       |       |       |
|                                                      | (1)     | -----                                                                           |       |       |       |       |       |       |       |
| Candidatus Carsonella 135557 - 167442nt              | (1)     | -----                                                                           |       |       |       |       |       |       |       |
| SARS-CoV-2 Reference Genome NC_045512.2              | (1)     | -----                                                                           |       |       |       |       |       |       |       |
|                                                      |         | Section 742                                                                     |       |       |       |       |       |       |       |
| Candidatus Carsonella ruddii strain BT chromosome... | (57058) | 57058                                                                           | 57068 | 57079 | 57090 | 57101 | 57112 | 57123 | 57134 |
|                                                      | (57058) | ATATTTTTTTATTAACAATGTATCATTTTTTTATAAATAAAAAATATAAATTATTATATTTCAGACAAATTAAAAAATA |       |       |       |       |       |       |       |
|                                                      | (1)     | -----                                                                           |       |       |       |       |       |       |       |
| Candidatus Carsonella 135557 - 167442nt              | (1)     | -----                                                                           |       |       |       |       |       |       |       |
| SARS-CoV-2 Reference Genome NC_045512.2              | (1)     | -----                                                                           |       |       |       |       |       |       |       |
|                                                      |         | Section 743                                                                     |       |       |       |       |       |       |       |
| Candidatus Carsonella ruddii strain BT chromosome... | (57135) | 57135                                                                           | 57145 | 57156 | 57167 | 57178 | 57189 | 57200 | 57211 |
|                                                      | (57135) | TAATTCCTTACTATTTAAATAAGTAATTCAAAAATGTGTTTTTTTTAAAAATTAATTTAATAAAGTTTTTTTAACAT   |       |       |       |       |       |       |       |
|                                                      | (1)     | -----                                                                           |       |       |       |       |       |       |       |
| Candidatus Carsonella 135557 - 167442nt              | (1)     | -----                                                                           |       |       |       |       |       |       |       |
| SARS-CoV-2 Reference Genome NC_045512.2              | (1)     | -----                                                                           |       |       |       |       |       |       |       |
|                                                      |         | Section 744                                                                     |       |       |       |       |       |       |       |
| Candidatus Carsonella ruddii strain BT chromosome... | (57212) | 57212                                                                           | 57222 | 57233 | 57244 | 57255 | 57266 | 57277 | 57288 |
|                                                      | (57212) | TATTTAAATTATAAGATATAATTATATAATTATTATTTATTATTTTTTAAATTTTTTAAATTTATTATAAAATTTA    |       |       |       |       |       |       |       |
|                                                      | (1)     | -----                                                                           |       |       |       |       |       |       |       |
| Candidatus Carsonella 135557 - 167442nt              | (1)     | -----                                                                           |       |       |       |       |       |       |       |
| SARS-CoV-2 Reference Genome NC_045512.2              | (1)     | -----                                                                           |       |       |       |       |       |       |       |

|                                                      |         |                                                                                |       |       |       |       |       |       |       |
|------------------------------------------------------|---------|--------------------------------------------------------------------------------|-------|-------|-------|-------|-------|-------|-------|
|                                                      |         | Section 745                                                                    |       |       |       |       |       |       |       |
| Candidatus Carsonella ruddii strain BT chromosome... | (57289) | 57289                                                                          | 57299 | 57310 | 57321 | 57332 | 57343 | 57354 | 57365 |
|                                                      | (57289) | TTCATTTTATTATATAACTTTTACTCATTGTTGTATTTATATATATATTTTCTATAATTATATTATTTTAAAAAA    |       |       |       |       |       |       |       |
|                                                      | (1)     | -----                                                                          |       |       |       |       |       |       |       |
| Candidatus Carsonella 135557 - 167442nt              | (1)     | -----                                                                          |       |       |       |       |       |       |       |
| SARS-CoV-2 Reference Genome NC_045512.2              | (1)     | -----                                                                          |       |       |       |       |       |       |       |
|                                                      |         | Section 746                                                                    |       |       |       |       |       |       |       |
| Candidatus Carsonella ruddii strain BT chromosome... | (57366) | 57366                                                                          | 57376 | 57387 | 57398 | 57409 | 57420 | 57431 | 57442 |
|                                                      | (57366) | ATTTTTTTAATATAATTTATAATGTAAAAATAATTTTTTTCAATCATATTGCTATTAAAAATTATATTTCCAATTTT  |       |       |       |       |       |       |       |
|                                                      | (1)     | -----                                                                          |       |       |       |       |       |       |       |
| Candidatus Carsonella 135557 - 167442nt              | (1)     | -----                                                                          |       |       |       |       |       |       |       |
| SARS-CoV-2 Reference Genome NC_045512.2              | (1)     | -----                                                                          |       |       |       |       |       |       |       |
|                                                      |         | Section 747                                                                    |       |       |       |       |       |       |       |
| Candidatus Carsonella ruddii strain BT chromosome... | (57443) | 57443                                                                          | 57453 | 57464 | 57475 | 57486 | 57497 | 57508 | 57519 |
|                                                      | (57443) | AAAATTTAAAAAATTATTTTTATTAATTATAATTTTAATAATTTTATTTTTTAATTCATTTATTTTAAATTCATAAT  |       |       |       |       |       |       |       |
|                                                      | (1)     | -----                                                                          |       |       |       |       |       |       |       |
| Candidatus Carsonella 135557 - 167442nt              | (1)     | -----                                                                          |       |       |       |       |       |       |       |
| SARS-CoV-2 Reference Genome NC_045512.2              | (1)     | -----                                                                          |       |       |       |       |       |       |       |
|                                                      |         | Section 748                                                                    |       |       |       |       |       |       |       |
| Candidatus Carsonella ruddii strain BT chromosome... | (57520) | 57520                                                                          | 57530 | 57541 | 57552 | 57563 | 57574 | 57585 | 57596 |
|                                                      | (57520) | TATTTATTAAATTTTTTTTTTTAGAAAACTTTTTAATAAATTATGTTTTTTTATTAAGAAAAAATTATCTTTATTA   |       |       |       |       |       |       |       |
|                                                      | (1)     | -----                                                                          |       |       |       |       |       |       |       |
| Candidatus Carsonella 135557 - 167442nt              | (1)     | -----                                                                          |       |       |       |       |       |       |       |
| SARS-CoV-2 Reference Genome NC_045512.2              | (1)     | -----                                                                          |       |       |       |       |       |       |       |
|                                                      |         | Section 749                                                                    |       |       |       |       |       |       |       |
| Candidatus Carsonella ruddii strain BT chromosome... | (57597) | 57597                                                                          | 57607 | 57618 | 57629 | 57640 | 57651 | 57662 | 57673 |
|                                                      | (57597) | TAAAAAATTTTATCAAAAAAATTTTTTTTCCAAAAATTTATTAATAAATTATTACCTATATAGATATTATCTTT     |       |       |       |       |       |       |       |
|                                                      | (1)     | -----                                                                          |       |       |       |       |       |       |       |
| Candidatus Carsonella 135557 - 167442nt              | (1)     | -----                                                                          |       |       |       |       |       |       |       |
| SARS-CoV-2 Reference Genome NC_045512.2              | (1)     | -----                                                                          |       |       |       |       |       |       |       |
|                                                      |         | Section 750                                                                    |       |       |       |       |       |       |       |
| Candidatus Carsonella ruddii strain BT chromosome... | (57674) | 57674                                                                          | 57684 | 57695 | 57706 | 57717 | 57728 | 57739 | 57750 |
|                                                      | (57674) | TACTGAATTTTATCTGATAAAAAATAAAATTTTTTTTATTATCATTAACAGAATAAAATAAATTTATAAAAAAATTAA |       |       |       |       |       |       |       |
|                                                      | (1)     | -----                                                                          |       |       |       |       |       |       |       |
| Candidatus Carsonella 135557 - 167442nt              | (1)     | -----                                                                          |       |       |       |       |       |       |       |
| SARS-CoV-2 Reference Genome NC_045512.2              | (1)     | -----                                                                          |       |       |       |       |       |       |       |

|                                                      |         |                                                                                |       |       |       |       |       |       |       |
|------------------------------------------------------|---------|--------------------------------------------------------------------------------|-------|-------|-------|-------|-------|-------|-------|
|                                                      |         | Section 751                                                                    |       |       |       |       |       |       |       |
| Candidatus Carsonella ruddii strain BT chromosome... | (57751) | 57751                                                                          | 57761 | 57772 | 57783 | 57794 | 57805 | 57816 | 57827 |
|                                                      | (57751) | AATAATTTTTTTTTTTATTATTAAATATAATATTTAGATCAATAGATTCAGTAAAGTTAAATTTTTATTATAAAAAA  |       |       |       |       |       |       |       |
|                                                      | (1)     | -----                                                                          |       |       |       |       |       |       |       |
| Candidatus Carsonella 135557 - 167442nt              | (1)     | -----                                                                          |       |       |       |       |       |       |       |
| SARS-CoV-2 Reference Genome NC_045512.2              | (1)     | -----                                                                          |       |       |       |       |       |       |       |
|                                                      |         | Section 752                                                                    |       |       |       |       |       |       |       |
| Candidatus Carsonella ruddii strain BT chromosome... | (57828) | 57828                                                                          | 57838 | 57849 | 57860 | 57871 | 57882 | 57893 | 57904 |
|                                                      | (57828) | AAATTACAAAAATTAATCAAAGAATTATTCATATTTAATACCTAAACTATAAAAAAGTACCTAAAATCATTCTCTAA  |       |       |       |       |       |       |       |
|                                                      | (1)     | -----                                                                          |       |       |       |       |       |       |       |
| Candidatus Carsonella 135557 - 167442nt              | (1)     | -----                                                                          |       |       |       |       |       |       |       |
| SARS-CoV-2 Reference Genome NC_045512.2              | (1)     | -----                                                                          |       |       |       |       |       |       |       |
|                                                      |         | Section 753                                                                    |       |       |       |       |       |       |       |
| Candidatus Carsonella ruddii strain BT chromosome... | (57905) | 57905                                                                          | 57915 | 57926 | 57937 | 57948 | 57959 | 57970 | 57981 |
|                                                      | (57905) | TAGAAGAAATTTTTTTTTTTTCATAAAAAATTCTATTTTGTAGAAATAATATTAATAATATCAAAATTATTATAAACA |       |       |       |       |       |       |       |
|                                                      | (1)     | -----                                                                          |       |       |       |       |       |       |       |
| Candidatus Carsonella 135557 - 167442nt              | (1)     | -----                                                                          |       |       |       |       |       |       |       |
| SARS-CoV-2 Reference Genome NC_045512.2              | (1)     | -----                                                                          |       |       |       |       |       |       |       |
|                                                      |         | Section 754                                                                    |       |       |       |       |       |       |       |
| Candidatus Carsonella ruddii strain BT chromosome... | (57982) | 57982                                                                          | 57992 | 58003 | 58014 | 58025 | 58036 | 58047 | 58058 |
|                                                      | (57982) | ATAGTTTCTATTCCTGGTTTTTTTAGAAAATTTTCTATATTTGTAATTTTTTTTATTACATTAGTTAAAGGTTCTAA  |       |       |       |       |       |       |       |
|                                                      | (1)     | -----                                                                          |       |       |       |       |       |       |       |
| Candidatus Carsonella 135557 - 167442nt              | (1)     | -----                                                                          |       |       |       |       |       |       |       |
| SARS-CoV-2 Reference Genome NC_045512.2              | (1)     | -----                                                                          |       |       |       |       |       |       |       |
|                                                      |         | Section 755                                                                    |       |       |       |       |       |       |       |
| Candidatus Carsonella ruddii strain BT chromosome... | (58059) | 58059                                                                          | 58069 | 58080 | 58091 | 58102 | 58113 | 58124 | 58135 |
|                                                      | (58059) | ACCTAATATTATTTTCATAATTTAAATTTTGAAAAATTATTATTTTAACATGAATAAATTCATTAATATTATTTTAG  |       |       |       |       |       |       |       |
|                                                      | (1)     | -----                                                                          |       |       |       |       |       |       |       |
| Candidatus Carsonella 135557 - 167442nt              | (1)     | -----                                                                          |       |       |       |       |       |       |       |
| SARS-CoV-2 Reference Genome NC_045512.2              | (1)     | -----                                                                          |       |       |       |       |       |       |       |
|                                                      |         | Section 756                                                                    |       |       |       |       |       |       |       |
| Candidatus Carsonella ruddii strain BT chromosome... | (58136) | 58136                                                                          | 58146 | 58157 | 58168 | 58179 | 58190 | 58201 | 58212 |
|                                                      | (58136) | TTAATTCATTAAATTTATTACAAAAAGTCATTAAATTTAAACCATATTGACCTAATATTGGACCAATAGGTGGTGTA  |       |       |       |       |       |       |       |
|                                                      | (1)     | -----                                                                          |       |       |       |       |       |       |       |
| Candidatus Carsonella 135557 - 167442nt              | (1)     | -----                                                                          |       |       |       |       |       |       |       |
| SARS-CoV-2 Reference Genome NC_045512.2              | (1)     | -----                                                                          |       |       |       |       |       |       |       |

|                                                      |         |                                                                                 |       |       |       |       |       |       |       |
|------------------------------------------------------|---------|---------------------------------------------------------------------------------|-------|-------|-------|-------|-------|-------|-------|
|                                                      |         | Section 757                                                                     |       |       |       |       |       |       |       |
| Candidatus Carsonella ruddii strain BT chromosome... | (58213) | 58213                                                                           | 58223 | 58234 | 58245 | 58256 | 58267 | 58278 | 58289 |
|                                                      | (58213) | GGTGTGCTTTTCCTGGTTTTAAATTAATTTTAATTTATATTTAACAATCATTATTTAATACAAAAATAAATTC       |       |       |       |       |       |       |       |
|                                                      | (1)     | -----                                                                           |       |       |       |       |       |       |       |
| Candidatus Carsonella 135557 - 167442nt              | (1)     | -----                                                                           |       |       |       |       |       |       |       |
| SARS-CoV-2 Reference Genome NC_045512.2              | (1)     | -----                                                                           |       |       |       |       |       |       |       |
|                                                      |         | Section 758                                                                     |       |       |       |       |       |       |       |
| Candidatus Carsonella ruddii strain BT chromosome... | (58290) | 58290                                                                           | 58300 | 58311 | 58322 | 58333 | 58344 | 58355 | 58366 |
|                                                      | (58290) | AAGTCAAAGAGGAATTGAACCTCTATTAACAGTTTGGAAACTATTACTTTACCTTTAAGTTATTGACTTATTAATA    |       |       |       |       |       |       |       |
|                                                      | (1)     | -----                                                                           |       |       |       |       |       |       |       |
| Candidatus Carsonella 135557 - 167442nt              | (1)     | -----                                                                           |       |       |       |       |       |       |       |
| SARS-CoV-2 Reference Genome NC_045512.2              | (1)     | -----                                                                           |       |       |       |       |       |       |       |
|                                                      |         | Section 759                                                                     |       |       |       |       |       |       |       |
| Candidatus Carsonella ruddii strain BT chromosome... | (58367) | 58367                                                                           | 58377 | 58388 | 58399 | 58410 | 58421 | 58432 | 58443 |
|                                                      | (58367) | ATAAAGCGGAAAAAGGAATTGAACCTTTACATTAACTTGGAAAGATAATATTTTACCAATAAACTATTCCCGCAC     |       |       |       |       |       |       |       |
|                                                      | (1)     | -----                                                                           |       |       |       |       |       |       |       |
| Candidatus Carsonella 135557 - 167442nt              | (1)     | -----                                                                           |       |       |       |       |       |       |       |
| SARS-CoV-2 Reference Genome NC_045512.2              | (1)     | -----                                                                           |       |       |       |       |       |       |       |
|                                                      |         | Section 760                                                                     |       |       |       |       |       |       |       |
| Candidatus Carsonella ruddii strain BT chromosome... | (58444) | 58444                                                                           | 58454 | 58465 | 58476 | 58487 | 58498 | 58509 | 58520 |
|                                                      | (58444) | AAAAAATGAAGGAAAGAGGATTGGAACCTCTGAAGCTTTCGCAGCAGATTTACAGTCTGTCCCTTTTGACCGCTCAG   |       |       |       |       |       |       |       |
|                                                      | (1)     | -----                                                                           |       |       |       |       |       |       |       |
| Candidatus Carsonella 135557 - 167442nt              | (1)     | -----                                                                           |       |       |       |       |       |       |       |
| SARS-CoV-2 Reference Genome NC_045512.2              | (1)     | -----                                                                           |       |       |       |       |       |       |       |
|                                                      |         | Section 761                                                                     |       |       |       |       |       |       |       |
| Candidatus Carsonella ruddii strain BT chromosome... | (58521) | 58521                                                                           | 58531 | 58542 | 58553 | 58564 | 58575 | 58586 | 58597 |
|                                                      | (58521) | GAATTCCTTCTTAAGAATTTTATTTTTTTTAAACAAATAAAAAATTCAAATTCAAATTTTTTTTATTAAATAATAACAT |       |       |       |       |       |       |       |
|                                                      | (1)     | -----                                                                           |       |       |       |       |       |       |       |
| Candidatus Carsonella 135557 - 167442nt              | (1)     | -----                                                                           |       |       |       |       |       |       |       |
| SARS-CoV-2 Reference Genome NC_045512.2              | (1)     | -----                                                                           |       |       |       |       |       |       |       |
|                                                      |         | Section 762                                                                     |       |       |       |       |       |       |       |
| Candidatus Carsonella ruddii strain BT chromosome... | (58598) | 58598                                                                           | 58608 | 58619 | 58630 | 58641 | 58652 | 58663 | 58674 |
|                                                      | (58598) | TATTTTTTAAATTTATCATAATCCAGTTAATACCTAAAAATAAAATTGATATAGTAAAAATCAAAAAATAATTAA     |       |       |       |       |       |       |       |
|                                                      | (1)     | -----                                                                           |       |       |       |       |       |       |       |
| Candidatus Carsonella 135557 - 167442nt              | (1)     | -----                                                                           |       |       |       |       |       |       |       |
| SARS-CoV-2 Reference Genome NC_045512.2              | (1)     | -----                                                                           |       |       |       |       |       |       |       |

|                                                      |         |                                                                               |       |       |       |       |       |       |       |
|------------------------------------------------------|---------|-------------------------------------------------------------------------------|-------|-------|-------|-------|-------|-------|-------|
|                                                      |         | Section 763                                                                   |       |       |       |       |       |       |       |
| Candidatus Carsonella ruddii strain BT chromosome... | (58675) | 58675                                                                         | 58685 | 58696 | 58707 | 58718 | 58729 | 58740 | 58751 |
|                                                      | (58675) | AATTAAGTAAATTTTATTTGTAAATTTTTTATTTTAAAAAAATAATATTTGTAATAATATTTGAAAAACAAAT     |       |       |       |       |       |       |       |
|                                                      | (1)     | -----                                                                         |       |       |       |       |       |       |       |
| Candidatus Carsonella 135557 - 167442nt              | (1)     | -----                                                                         |       |       |       |       |       |       |       |
| SARS-CoV-2 Reference Genome NC_045512.2              | (1)     | -----                                                                         |       |       |       |       |       |       |       |
|                                                      |         | Section 764                                                                   |       |       |       |       |       |       |       |
| Candidatus Carsonella ruddii strain BT chromosome... | (58752) | 58752                                                                         | 58762 | 58773 | 58784 | 58795 | 58806 | 58817 | 58828 |
|                                                      | (58752) | TATAAAATATTATTTTATATTTTAAATAATAAAAAATGTATAGTTAAACAAAAATAATAAAAAAAATTTTTTTT    |       |       |       |       |       |       |       |
|                                                      | (1)     | -----                                                                         |       |       |       |       |       |       |       |
| Candidatus Carsonella 135557 - 167442nt              | (1)     | -----                                                                         |       |       |       |       |       |       |       |
| SARS-CoV-2 Reference Genome NC_045512.2              | (1)     | -----                                                                         |       |       |       |       |       |       |       |
|                                                      |         | Section 765                                                                   |       |       |       |       |       |       |       |
| Candidatus Carsonella ruddii strain BT chromosome... | (58829) | 58829                                                                         | 58839 | 58850 | 58861 | 58872 | 58883 | 58894 | 58905 |
|                                                      | (58829) | TCTTTTAGTAAATTATTTTTTATATAAATTATTAATATAAGACATAACCATACAATGTGAATAAAATGCCAAAT    |       |       |       |       |       |       |       |
|                                                      | (1)     | -----                                                                         |       |       |       |       |       |       |       |
| Candidatus Carsonella 135557 - 167442nt              | (1)     | -----                                                                         |       |       |       |       |       |       |       |
| SARS-CoV-2 Reference Genome NC_045512.2              | (1)     | -----                                                                         |       |       |       |       |       |       |       |
|                                                      |         | Section 766                                                                   |       |       |       |       |       |       |       |
| Candidatus Carsonella ruddii strain BT chromosome... | (58906) | 58906                                                                         | 58916 | 58927 | 58938 | 58949 | 58960 | 58971 | 58982 |
|                                                      | (58906) | AAAGAAAATATTATATTGTTAATTTTAAATTTTTTATTATATAAGTTTAAATAATAATAAATTTAAAGAAATAAAAT |       |       |       |       |       |       |       |
|                                                      | (1)     | -----                                                                         |       |       |       |       |       |       |       |
| Candidatus Carsonella 135557 - 167442nt              | (1)     | -----                                                                         |       |       |       |       |       |       |       |
| SARS-CoV-2 Reference Genome NC_045512.2              | (1)     | -----                                                                         |       |       |       |       |       |       |       |
|                                                      |         | Section 767                                                                   |       |       |       |       |       |       |       |
| Candidatus Carsonella ruddii strain BT chromosome... | (58983) | 58983                                                                         | 58993 | 59004 | 59015 | 59026 | 59037 | 59048 | 59059 |
|                                                      | (58983) | AGATATTAAACATGAAATGCGTGAAACATAATAATAAAATAATAATTAGATAAATAATTATTTGTGTTAAATTTA   |       |       |       |       |       |       |       |
|                                                      | (1)     | -----                                                                         |       |       |       |       |       |       |       |
| Candidatus Carsonella 135557 - 167442nt              | (1)     | -----                                                                         |       |       |       |       |       |       |       |
| SARS-CoV-2 Reference Genome NC_045512.2              | (1)     | -----                                                                         |       |       |       |       |       |       |       |
|                                                      |         | Section 768                                                                   |       |       |       |       |       |       |       |
| Candidatus Carsonella ruddii strain BT chromosome... | (59060) | 59060                                                                         | 59070 | 59081 | 59092 | 59103 | 59114 | 59125 | 59136 |
|                                                      | (59060) | AATTAATTTTATTTTAAATGATAAAATCTTTAAATTCATAATTAAAAATAATATAGAAAAATTAATTTTAAATAA   |       |       |       |       |       |       |       |
|                                                      | (1)     | -----                                                                         |       |       |       |       |       |       |       |
| Candidatus Carsonella 135557 - 167442nt              | (1)     | -----                                                                         |       |       |       |       |       |       |       |
| SARS-CoV-2 Reference Genome NC_045512.2              | (1)     | -----                                                                         |       |       |       |       |       |       |       |



|                                                      |         |                                                                                 |       |       |       |       |       |       |       |
|------------------------------------------------------|---------|---------------------------------------------------------------------------------|-------|-------|-------|-------|-------|-------|-------|
|                                                      |         | Section 769                                                                     |       |       |       |       |       |       |       |
| Candidatus Carsonella ruddii strain BT chromosome... | (59137) | 59137                                                                           | 59147 | 59158 | 59169 | 59180 | 59191 | 59202 | 59213 |
|                                                      | (59137) | CAATATTTATTTTTAAAATTATTAATATTTTTTAAAGATAAAAAACTACAAAAAAGAAGTAAAAGCGTTTCTATTAA   |       |       |       |       |       |       |       |
|                                                      | (1)     | -----                                                                           |       |       |       |       |       |       |       |
| Candidatus Carsonella 135557 - 167442nt              | (1)     | -----                                                                           |       |       |       |       |       |       |       |
| SARS-CoV-2 Reference Genome NC_045512.2              | (1)     | -----                                                                           |       |       |       |       |       |       |       |
|                                                      |         | Section 770                                                                     |       |       |       |       |       |       |       |
| Candidatus Carsonella ruddii strain BT chromosome... | (59214) | 59214                                                                           | 59224 | 59235 | 59246 | 59257 | 59268 | 59279 | 59290 |
|                                                      | (59214) | TAAATTCTATAATTAAAAATAATTTTTTTTAAAAAAAATTATTAGATGATAAAAAATGAAATAAATAAACTGCAA     |       |       |       |       |       |       |       |
|                                                      | (1)     | -----                                                                           |       |       |       |       |       |       |       |
| Candidatus Carsonella 135557 - 167442nt              | (1)     | -----                                                                           |       |       |       |       |       |       |       |
| SARS-CoV-2 Reference Genome NC_045512.2              | (1)     | -----                                                                           |       |       |       |       |       |       |       |
|                                                      |         | Section 771                                                                     |       |       |       |       |       |       |       |
| Candidatus Carsonella ruddii strain BT chromosome... | (59291) | 59291                                                                           | 59301 | 59312 | 59323 | 59334 | 59345 | 59356 | 59367 |
|                                                      | (59291) | ACATTATACAATCACTTATCATATATAACCAAAACCTAACAAATCTTTATTTATTTTATTCATATAAAAAATAAAAT   |       |       |       |       |       |       |       |
|                                                      | (1)     | -----                                                                           |       |       |       |       |       |       |       |
| Candidatus Carsonella 135557 - 167442nt              | (1)     | -----                                                                           |       |       |       |       |       |       |       |
| SARS-CoV-2 Reference Genome NC_045512.2              | (1)     | -----                                                                           |       |       |       |       |       |       |       |
|                                                      |         | Section 772                                                                     |       |       |       |       |       |       |       |
| Candidatus Carsonella ruddii strain BT chromosome... | (59368) | 59368                                                                           | 59378 | 59389 | 59400 | 59411 | 59422 | 59433 | 59444 |
|                                                      | (59368) | TATATTAATTATAATAAAAAATAATGATAAAAAAGTAATCTTCCACATCCACCAAATAATTGAAAATGAAAAATAA    |       |       |       |       |       |       |       |
|                                                      | (1)     | -----                                                                           |       |       |       |       |       |       |       |
| Candidatus Carsonella 135557 - 167442nt              | (1)     | -----                                                                           |       |       |       |       |       |       |       |
| SARS-CoV-2 Reference Genome NC_045512.2              | (1)     | -----                                                                           |       |       |       |       |       |       |       |
|                                                      |         | Section 773                                                                     |       |       |       |       |       |       |       |
| Candidatus Carsonella ruddii strain BT chromosome... | (59445) | 59445                                                                           | 59455 | 59466 | 59477 | 59488 | 59499 | 59510 | 59521 |
|                                                      | (59445) | ATAAAGATAAAGAAATTAAAAATGGAAAAATTTTTTTTTATGATTTATTTTAATAAAATTATTTTTTAAAAAAAT     |       |       |       |       |       |       |       |
|                                                      | (1)     | -----                                                                           |       |       |       |       |       |       |       |
| Candidatus Carsonella 135557 - 167442nt              | (1)     | -----                                                                           |       |       |       |       |       |       |       |
| SARS-CoV-2 Reference Genome NC_045512.2              | (1)     | -----                                                                           |       |       |       |       |       |       |       |
|                                                      |         | Section 774                                                                     |       |       |       |       |       |       |       |
| Candidatus Carsonella ruddii strain BT chromosome... | (59522) | 59522                                                                           | 59532 | 59543 | 59554 | 59565 | 59576 | 59587 | 59598 |
|                                                      | (59522) | TTTTTATATAAAAAATCATTATTTTGATTTATAATATTATTATTAAACAAAAAATTGTTTCATAATTATTTATAAAATT |       |       |       |       |       |       |       |
|                                                      | (1)     | -----                                                                           |       |       |       |       |       |       |       |
| Candidatus Carsonella 135557 - 167442nt              | (1)     | -----                                                                           |       |       |       |       |       |       |       |
| SARS-CoV-2 Reference Genome NC_045512.2              | (1)     | -----                                                                           |       |       |       |       |       |       |       |

## SARS-CoV-2 &amp; Bakterien.apr

|                                                      |         |                                                                                 |       |       |       |       |       |       |       |
|------------------------------------------------------|---------|---------------------------------------------------------------------------------|-------|-------|-------|-------|-------|-------|-------|
|                                                      |         | Section 775                                                                     |       |       |       |       |       |       |       |
| Candidatus Carsonella ruddii strain BT chromosome... | (59599) | 59599                                                                           | 59609 | 59620 | 59631 | 59642 | 59653 | 59664 | 59675 |
|                                                      | (59599) | ATAATTTTTTTTAGCAAATATTAAATTTATAATTTGAATTAAAAATAGATAAAAAAATTATCAAACCTACCTATAAATG |       |       |       |       |       |       |       |
|                                                      | (1)     | -----                                                                           |       |       |       |       |       |       |       |
| Candidatus Carsonella 135557 - 167442nt              | (1)     | -----                                                                           |       |       |       |       |       |       |       |
| SARS-CoV-2 Reference Genome NC_045512.2              | (1)     | -----                                                                           |       |       |       |       |       |       |       |
|                                                      |         | Section 776                                                                     |       |       |       |       |       |       |       |
| Candidatus Carsonella ruddii strain BT chromosome... | (59676) | 59676                                                                           | 59686 | 59697 | 59708 | 59719 | 59730 | 59741 | 59752 |
|                                                      | (59676) | AAATTAATAATAATTTTGACCATAAAAAATTATAATAAATTATAGTTCTTCTATTTCATTCCATAATAACCTAATAAA  |       |       |       |       |       |       |       |
|                                                      | (1)     | -----                                                                           |       |       |       |       |       |       |       |
| Candidatus Carsonella 135557 - 167442nt              | (1)     | -----                                                                           |       |       |       |       |       |       |       |
| SARS-CoV-2 Reference Genome NC_045512.2              | (1)     | -----                                                                           |       |       |       |       |       |       |       |
|                                                      |         | Section 777                                                                     |       |       |       |       |       |       |       |
| Candidatus Carsonella ruddii strain BT chromosome... | (59753) | 59753                                                                           | 59763 | 59774 | 59785 | 59796 | 59807 | 59818 | 59829 |
|                                                      | (59753) | TAAAAAGGAAAAAAGTTATTGTAACCTCTAAAAACCATAATAAAATATTTATATAAGAAAAAATTCTGATAATTT     |       |       |       |       |       |       |       |
|                                                      | (1)     | -----                                                                           |       |       |       |       |       |       |       |
| Candidatus Carsonella 135557 - 167442nt              | (1)     | -----                                                                           |       |       |       |       |       |       |       |
| SARS-CoV-2 Reference Genome NC_045512.2              | (1)     | -----                                                                           |       |       |       |       |       |       |       |
|                                                      |         | Section 778                                                                     |       |       |       |       |       |       |       |
| Candidatus Carsonella ruddii strain BT chromosome... | (59830) | 59830                                                                           | 59840 | 59851 | 59862 | 59873 | 59884 | 59895 | 59906 |
|                                                      | (59830) | TTTATTAAAAATAATAGAAAACCAATATTGAAATCCAGCAAAATATCCAAATAATACTCCTCCTATAATAACTGAAT   |       |       |       |       |       |       |       |
|                                                      | (1)     | -----                                                                           |       |       |       |       |       |       |       |
| Candidatus Carsonella 135557 - 167442nt              | (1)     | -----                                                                           |       |       |       |       |       |       |       |
| SARS-CoV-2 Reference Genome NC_045512.2              | (1)     | -----                                                                           |       |       |       |       |       |       |       |
|                                                      |         | Section 779                                                                     |       |       |       |       |       |       |       |
| Candidatus Carsonella ruddii strain BT chromosome... | (59907) | 59907                                                                           | 59917 | 59928 | 59939 | 59950 | 59961 | 59972 | 59983 |
|                                                      | (59907) | GAAAATGAGCAATTAAAAACATTGAATTATGAAAAATATAATCTAAATTTGGAATAGATAAAATAATACCTGAAAAA   |       |       |       |       |       |       |       |
|                                                      | (1)     | -----                                                                           |       |       |       |       |       |       |       |
| Candidatus Carsonella 135557 - 167442nt              | (1)     | -----                                                                           |       |       |       |       |       |       |       |
| SARS-CoV-2 Reference Genome NC_045512.2              | (1)     | -----                                                                           |       |       |       |       |       |       |       |
|                                                      |         | Section 780                                                                     |       |       |       |       |       |       |       |
| Candidatus Carsonella ruddii strain BT chromosome... | (59984) | 59984                                                                           | 59994 | 60005 | 60016 | 60027 | 60038 | 60049 | 60060 |
|                                                      | (59984) | CCTCCAATAGAAAATATTATTATAAATGATATAAACCAAAATAATAAAGATGTTTTTTTTTTTTTACTAAATAAAAT   |       |       |       |       |       |       |       |
|                                                      | (1)     | -----                                                                           |       |       |       |       |       |       |       |
| Candidatus Carsonella 135557 - 167442nt              | (1)     | -----                                                                           |       |       |       |       |       |       |       |
| SARS-CoV-2 Reference Genome NC_045512.2              | (1)     | -----                                                                           |       |       |       |       |       |       |       |

## SARS-CoV-2 &amp; Bakterien.apr

|                                                      |         |                                                                                |       |       |       |       |       |       |             |
|------------------------------------------------------|---------|--------------------------------------------------------------------------------|-------|-------|-------|-------|-------|-------|-------------|
|                                                      |         |                                                                                |       |       |       |       |       |       | Section 781 |
| Candidatus Carsonella ruddii strain BT chromosome... | (60061) | 60061                                                                          | 60071 | 60082 | 60093 | 60104 | 60115 | 60126 | 60137       |
|                                                      | (60061) | TGTAATAACCAATTATAAATTTTAACTCCGGTAGGTATTGCTATTACCATAGTTGATATACTAAAAATATATTAG    |       |       |       |       |       |       |             |
|                                                      | (1)     | -----                                                                          |       |       |       |       |       |       |             |
|                                                      | (1)     | -----                                                                          |       |       |       |       |       |       |             |
|                                                      |         |                                                                                |       |       |       |       |       |       | Section 782 |
| Candidatus Carsonella ruddii strain BT chromosome... | (60138) | 60138                                                                          | 60148 | 60159 | 60170 | 60181 | 60192 | 60203 | 60214       |
|                                                      | (60138) | TAGTATAACCAGAACCCATTGTAAAAAATGATGTAACCAAACTAAAAAGATAAAATAGTTATTGATAATGTAGCA    |       |       |       |       |       |       |             |
|                                                      | (1)     | -----                                                                          |       |       |       |       |       |       |             |
|                                                      | (1)     | -----                                                                          |       |       |       |       |       |       |             |
|                                                      |         |                                                                                |       |       |       |       |       |       | Section 783 |
| Candidatus Carsonella ruddii strain BT chromosome... | (60215) | 60215                                                                          | 60225 | 60236 | 60247 | 60258 | 60269 | 60280 | 60291       |
|                                                      | (60215) | TAAAGTAATGAATTATAGGAAAATAATTGTTTTTCACATATATTTGTTAATATTTTCAGAAAATATTCCAAAAGAAGG |       |       |       |       |       |       |             |
|                                                      | (1)     | -----                                                                          |       |       |       |       |       |       |             |
|                                                      | (1)     | -----                                                                          |       |       |       |       |       |       |             |
|                                                      |         |                                                                                |       |       |       |       |       |       | Section 784 |
| Candidatus Carsonella ruddii strain BT chromosome... | (60292) | 60292                                                                          | 60302 | 60313 | 60324 | 60335 | 60346 | 60357 | 60368       |
|                                                      | (60292) | TAAATTTAAATATAAACTTCTGGGTGTCCCCATGCCCATATTAAATTAATATATAACATTTGTTGTCCACCATAAA   |       |       |       |       |       |       |             |
|                                                      | (1)     | -----                                                                          |       |       |       |       |       |       |             |
|                                                      | (1)     | -----                                                                          |       |       |       |       |       |       |             |
|                                                      |         |                                                                                |       |       |       |       |       |       | Section 785 |
| Candidatus Carsonella ruddii strain BT chromosome... | (60369) | 60369                                                                          | 60379 | 60390 | 60401 | 60412 | 60423 | 60434 | 60445       |
|                                                      | (60369) | ATGATGTAAAAAATGAAAATTAAATTTCTATCTAAAAATAATAAAAAATATTATTATATTTAAGATAGGAAAAGAA   |       |       |       |       |       |       |             |
|                                                      | (1)     | -----                                                                          |       |       |       |       |       |       |             |
|                                                      | (1)     | -----                                                                          |       |       |       |       |       |       |             |
|                                                      |         |                                                                                |       |       |       |       |       |       | Section 786 |
| Candidatus Carsonella ruddii strain BT chromosome... | (60446) | 60446                                                                          | 60456 | 60467 | 60478 | 60489 | 60500 | 60511 | 60522       |
|                                                      | (60446) | ATTAAATTAATATATTTGAACATAAACATGTCCAAATAAAAAATTGGTAATTTTAAAAAATAAATTTTTTTTTTCT   |       |       |       |       |       |       |             |
|                                                      | (1)     | -----                                                                          |       |       |       |       |       |       |             |
|                                                      | (1)     | -----                                                                          |       |       |       |       |       |       |             |

## SARS-CoV-2 &amp; Bakterien.apr

|                                                      |         |                                                                                |       |       |       |       |       |       |       |
|------------------------------------------------------|---------|--------------------------------------------------------------------------------|-------|-------|-------|-------|-------|-------|-------|
| Section 787                                          |         |                                                                                |       |       |       |       |       |       |       |
| Candidatus Carsonella ruddii strain BT chromosome... | (60523) | 60523                                                                          | 60533 | 60544 | 60555 | 60566 | 60577 | 60588 | 60599 |
| Candidatus Carsonella 135557 - 167442nt              | (60523) | ACATTTTAAAATTGTTGTTATAAAATTTATAGATGTTATTAAAGTTGAAATACCAGAAATCTGTAAACTCCAAATCC  |       |       |       |       |       |       |       |
| SARS-CoV-2 Reference Genome NC_045512.2              | (1)     | -----                                                                          |       |       |       |       |       |       |       |
|                                                      | (1)     | -----                                                                          |       |       |       |       |       |       |       |
| Section 788                                          |         |                                                                                |       |       |       |       |       |       |       |
| Candidatus Carsonella ruddii strain BT chromosome... | (60600) | 60600                                                                          | 60610 | 60621 | 60632 | 60643 | 60654 | 60665 | 60676 |
| Candidatus Carsonella 135557 - 167442nt              | (60600) | AATAATCAACTCCTACCCAAGGACTAAATGTTTTTCTGAAAGAGGAGGATATGCTAACCATCCTATTTTAGAAAAAC  |       |       |       |       |       |       |       |
| SARS-CoV-2 Reference Genome NC_045512.2              | (1)     | -----                                                                          |       |       |       |       |       |       |       |
|                                                      | (1)     | -----                                                                          |       |       |       |       |       |       |       |
| Section 789                                          |         |                                                                                |       |       |       |       |       |       |       |
| Candidatus Carsonella ruddii strain BT chromosome... | (60677) | 60677                                                                          | 60687 | 60698 | 60709 | 60720 | 60731 | 60742 | 60753 |
| Candidatus Carsonella 135557 - 167442nt              | (60677) | TCACCAAATAATAAAGATATGTTAATTAATAATACTGAAAAAAAAATTTAGCCAAAACTTAGTAAATTCAAAGAAGG  |       |       |       |       |       |       |       |
| SARS-CoV-2 Reference Genome NC_045512.2              | (1)     | -----                                                                          |       |       |       |       |       |       |       |
|                                                      | (1)     | -----                                                                          |       |       |       |       |       |       |       |
| Section 790                                          |         |                                                                                |       |       |       |       |       |       |       |
| Candidatus Carsonella ruddii strain BT chromosome... | (60754) | 60754                                                                          | 60764 | 60775 | 60786 | 60797 | 60808 | 60819 | 60830 |
| Candidatus Carsonella 135557 - 167442nt              | (60754) | AAAAGCAACATCTATAGATCCTATTTGTAAAGGAATAATTATATTTCATTAAACCAATCATAAACGGCATTGCAACAA |       |       |       |       |       |       |       |
| SARS-CoV-2 Reference Genome NC_045512.2              | (1)     | -----                                                                          |       |       |       |       |       |       |       |
|                                                      | (1)     | -----                                                                          |       |       |       |       |       |       |       |
| Section 791                                          |         |                                                                                |       |       |       |       |       |       |       |
| Candidatus Carsonella ruddii strain BT chromosome... | (60831) | 60831                                                                          | 60841 | 60852 | 60863 | 60874 | 60885 | 60896 | 60907 |
| Candidatus Carsonella 135557 - 167442nt              | (60831) | AAAAAATCATGATTACTCCATGAGCTGTAAAAATTTGACTATAATGGTTTGAAGATAAATATCCTTCATGATTGTAA  |       |       |       |       |       |       |       |
| SARS-CoV-2 Reference Genome NC_045512.2              | (1)     | -----                                                                          |       |       |       |       |       |       |       |
|                                                      | (1)     | -----                                                                          |       |       |       |       |       |       |       |
| Section 792                                          |         |                                                                                |       |       |       |       |       |       |       |
| Candidatus Carsonella ruddii strain BT chromosome... | (60908) | 60908                                                                          | 60918 | 60929 | 60940 | 60951 | 60962 | 60973 | 60984 |
| Candidatus Carsonella 135557 - 167442nt              | (60908) | CTTAATAATTGTTGTAATCTCATCATTAAAGCATCAACAAAACCTCTAATTAACATAATAAATGATATTAATAAATA  |       |       |       |       |       |       |       |
| SARS-CoV-2 Reference Genome NC_045512.2              | (1)     | -----                                                                          |       |       |       |       |       |       |       |
|                                                      | (1)     | -----                                                                          |       |       |       |       |       |       |       |

## SARS-CoV-2 &amp; Bakterien.apr

|                                                      |         |                                                                                  |       |       |       |       |       |       |       |
|------------------------------------------------------|---------|----------------------------------------------------------------------------------|-------|-------|-------|-------|-------|-------|-------|
|                                                      |         | Section 793                                                                      |       |       |       |       |       |       |       |
| Candidatus Carsonella ruddii strain BT chromosome... | (60985) | 60985                                                                            | 60995 | 61006 | 61017 | 61028 | 61039 | 61050 | 61061 |
|                                                      | (60985) | TAATTTTCCTATTTTTTTATGATCAAAAGAAACAGAAATAATTTTTATTTTTTTATAAAAAGGTTTAAAAATGGAA     |       |       |       |       |       |       |       |
|                                                      | (1)     | -----                                                                            |       |       |       |       |       |       |       |
| Candidatus Carsonella 135557 - 167442nt              | (1)     | -----                                                                            |       |       |       |       |       |       |       |
| SARS-CoV-2 Reference Genome NC_045512.2              | (1)     | -----                                                                            |       |       |       |       |       |       |       |
|                                                      |         | Section 794                                                                      |       |       |       |       |       |       |       |
| Candidatus Carsonella ruddii strain BT chromosome... | (61062) | 61062                                                                            | 61072 | 61083 | 61094 | 61105 | 61116 | 61127 | 61138 |
|                                                      | (61062) | TTGAAATAAATAAAAAATATTATTATTGTTATAAATAAAAAATATTATTATTGGTTCTGTTATAGGAACAGAATTAAAA  |       |       |       |       |       |       |       |
|                                                      | (1)     | -----                                                                            |       |       |       |       |       |       |       |
| Candidatus Carsonella 135557 - 167442nt              | (1)     | -----                                                                            |       |       |       |       |       |       |       |
| SARS-CoV-2 Reference Genome NC_045512.2              | (1)     | -----                                                                            |       |       |       |       |       |       |       |
|                                                      |         | Section 795                                                                      |       |       |       |       |       |       |       |
| Candidatus Carsonella ruddii strain BT chromosome... | (61139) | 61139                                                                            | 61149 | 61160 | 61171 | 61182 | 61193 | 61204 | 61215 |
|                                                      | (61139) | TTTAATTTTCCTAAAATCATTTTTTTTTTAATTATTAAATAAAATATTTTATTATTTCTTATTTTAAAAAATTTATTT   |       |       |       |       |       |       |       |
|                                                      | (1)     | -----                                                                            |       |       |       |       |       |       |       |
| Candidatus Carsonella 135557 - 167442nt              | (1)     | -----                                                                            |       |       |       |       |       |       |       |
| SARS-CoV-2 Reference Genome NC_045512.2              | (1)     | -----                                                                            |       |       |       |       |       |       |       |
|                                                      |         | Section 796                                                                      |       |       |       |       |       |       |       |
| Candidatus Carsonella ruddii strain BT chromosome... | (61216) | 61216                                                                            | 61226 | 61237 | 61248 | 61259 | 61270 | 61281 | 61292 |
|                                                      | (61216) | ACAAAACCTTCCTTCTTTTATTAATAAATTATATTTTTTAATATTAATAAAAAAATTGATTTTTTAATATTGTTAACCCA |       |       |       |       |       |       |       |
|                                                      | (1)     | -----                                                                            |       |       |       |       |       |       |       |
| Candidatus Carsonella 135557 - 167442nt              | (1)     | -----                                                                            |       |       |       |       |       |       |       |
| SARS-CoV-2 Reference Genome NC_045512.2              | (1)     | -----                                                                            |       |       |       |       |       |       |       |
|                                                      |         | Section 797                                                                      |       |       |       |       |       |       |       |
| Candidatus Carsonella ruddii strain BT chromosome... | (61293) | 61293                                                                            | 61303 | 61314 | 61325 | 61336 | 61347 | 61358 | 61369 |
|                                                      | (61293) | ATAAAAAAATTTTTTTTAATTAATAAAAAAATATTTATTCTTAATTTATTAAATCCTATTCCACTATAATTTGAAG     |       |       |       |       |       |       |       |
|                                                      | (1)     | -----                                                                            |       |       |       |       |       |       |       |
| Candidatus Carsonella 135557 - 167442nt              | (1)     | -----                                                                            |       |       |       |       |       |       |       |
| SARS-CoV-2 Reference Genome NC_045512.2              | (1)     | -----                                                                            |       |       |       |       |       |       |       |
|                                                      |         | Section 798                                                                      |       |       |       |       |       |       |       |
| Candidatus Carsonella ruddii strain BT chromosome... | (61370) | 61370                                                                            | 61380 | 61391 | 61402 | 61413 | 61424 | 61435 | 61446 |
|                                                      | (61370) | AAAAACCATGACAAAAACCATGTTTTAAATTAATAAATTTATATATTTATGAGAATTACTCATACAATAAAATTGA     |       |       |       |       |       |       |       |
|                                                      | (1)     | -----                                                                            |       |       |       |       |       |       |       |
| Candidatus Carsonella 135557 - 167442nt              | (1)     | -----                                                                            |       |       |       |       |       |       |       |
| SARS-CoV-2 Reference Genome NC_045512.2              | (1)     | -----                                                                            |       |       |       |       |       |       |       |

## SARS-CoV-2 &amp; Bakterien.apr

|                                                      |         |                                                                               |       |       |       |       |       |       |       |
|------------------------------------------------------|---------|-------------------------------------------------------------------------------|-------|-------|-------|-------|-------|-------|-------|
| Section 799                                          |         |                                                                               |       |       |       |       |       |       |       |
| Candidatus Carsonella ruddii strain BT chromosome... | (61447) | 61447                                                                         | 61457 | 61468 | 61479 | 61490 | 61501 | 61512 | 61523 |
| Candidatus Carsonella 135557 - 167442nt              | (61447) | AATCCAAATTTTGGGAATACATAAAGTATTTAAAACATTGTTAGAAGATAAAAAAATTTTATAGGTATTAATATAGG |       |       |       |       |       |       |       |
| SARS-CoV-2 Reference Genome NC_045512.2              | (1)     | -----                                                                         |       |       |       |       |       |       |       |
|                                                      | (1)     | -----                                                                         |       |       |       |       |       |       |       |
| Section 800                                          |         |                                                                               |       |       |       |       |       |       |       |
| Candidatus Carsonella ruddii strain BT chromosome... | (61524) | 61524                                                                         | 61534 | 61545 | 61556 | 61567 | 61578 | 61589 | 61600 |
| Candidatus Carsonella 135557 - 167442nt              | (61524) | TAAGCAAAATTCGTTAAAAGTTAAAATTTTGAATAGGAAAAATAATCATCCATTTCCAATTCATTGATATAATTT   |       |       |       |       |       |       |       |
| SARS-CoV-2 Reference Genome NC_045512.2              | (1)     | -----                                                                         |       |       |       |       |       |       |       |
|                                                      | (1)     | -----                                                                         |       |       |       |       |       |       |       |
| Section 801                                          |         |                                                                               |       |       |       |       |       |       |       |
| Candidatus Carsonella ruddii strain BT chromosome... | (61601) | 61601                                                                         | 61611 | 61622 | 61633 | 61644 | 61655 | 61666 | 61677 |
| Candidatus Carsonella 135557 - 167442nt              | (61601) | CTAATATTAATGGTTTTAAATTTGAATATAAAATTTTATAGGATTAATGTAAAAATTACTTTTTATTGTGTAAATA  |       |       |       |       |       |       |       |
| SARS-CoV-2 Reference Genome NC_045512.2              | (1)     | -----                                                                         |       |       |       |       |       |       |       |
|                                                      | (1)     | -----                                                                         |       |       |       |       |       |       |       |
| Section 802                                          |         |                                                                               |       |       |       |       |       |       |       |
| Candidatus Carsonella ruddii strain BT chromosome... | (61678) | 61678                                                                         | 61688 | 61699 | 61710 | 61721 | 61732 | 61743 | 61754 |
| Candidatus Carsonella 135557 - 167442nt              | (61678) | CTTAATATTAAAATTATTAACTAGGAAAAATAAAAGCGATAAATTCATTAAATTTGAATCAATTAAAAAAGGAAT   |       |       |       |       |       |       |       |
| SARS-CoV-2 Reference Genome NC_045512.2              | (1)     | -----                                                                         |       |       |       |       |       |       |       |
|                                                      | (1)     | -----                                                                         |       |       |       |       |       |       |       |
| Section 803                                          |         |                                                                               |       |       |       |       |       |       |       |
| Candidatus Carsonella ruddii strain BT chromosome... | (61755) | 61755                                                                         | 61765 | 61776 | 61787 | 61798 | 61809 | 61820 | 61831 |
| Candidatus Carsonella 135557 - 167442nt              | (61755) | TTTTTTCATATTTTAAATTATAAATAAACTTACTAATAGAGTAAATATTGATATTAATAATATTAAATAAATTGTAT |       |       |       |       |       |       |       |
| SARS-CoV-2 Reference Genome NC_045512.2              | (1)     | -----                                                                         |       |       |       |       |       |       |       |
|                                                      | (1)     | -----                                                                         |       |       |       |       |       |       |       |
| Section 804                                          |         |                                                                               |       |       |       |       |       |       |       |
| Candidatus Carsonella ruddii strain BT chromosome... | (61832) | 61832                                                                         | 61842 | 61853 | 61864 | 61875 | 61886 | 61897 | 61908 |
| Candidatus Carsonella 135557 - 167442nt              | (61832) | TTAATAACAATTGATTCTCAATTAATCTATTCAAACCTAAAAAATGGTTTTTAATAATATTTATCATATTTTAAACA |       |       |       |       |       |       |       |
| SARS-CoV-2 Reference Genome NC_045512.2              | (1)     | -----                                                                         |       |       |       |       |       |       |       |
|                                                      | (1)     | -----                                                                         |       |       |       |       |       |       |       |

|                                                      |         |                                                                                 |       |       |       |       |       |       |       |
|------------------------------------------------------|---------|---------------------------------------------------------------------------------|-------|-------|-------|-------|-------|-------|-------|
|                                                      |         | Section 805                                                                     |       |       |       |       |       |       |       |
| Candidatus Carsonella ruddii strain BT chromosome... | (61909) | 61909                                                                           | 61919 | 61930 | 61941 | 61952 | 61963 | 61974 | 61985 |
|                                                      | (61909) | TTTTTTATAAATTTTCAAAAAAAATTATATCAAACTTATTAAATTTGGAACAAATAGTAAAAATTGTTTTATTAAA    |       |       |       |       |       |       |       |
|                                                      | (1)     | -----                                                                           |       |       |       |       |       |       |       |
| Candidatus Carsonella 135557 - 167442nt              | (1)     | -----                                                                           |       |       |       |       |       |       |       |
| SARS-CoV-2 Reference Genome NC_045512.2              | (1)     | -----                                                                           |       |       |       |       |       |       |       |
|                                                      |         | Section 806                                                                     |       |       |       |       |       |       |       |
| Candidatus Carsonella ruddii strain BT chromosome... | (61986) | 61986                                                                           | 61996 | 62007 | 62018 | 62029 | 62040 | 62051 | 62062 |
|                                                      | (61986) | AAAAATAATGTTTTTTTTTTTTATTCCATTATAAAAAAAAAATTTTATAAAAAATAACAATATTAAAAATATTTCAAAA |       |       |       |       |       |       |       |
|                                                      | (1)     | -----                                                                           |       |       |       |       |       |       |       |
| Candidatus Carsonella 135557 - 167442nt              | (1)     | -----                                                                           |       |       |       |       |       |       |       |
| SARS-CoV-2 Reference Genome NC_045512.2              | (1)     | -----                                                                           |       |       |       |       |       |       |       |
|                                                      |         | Section 807                                                                     |       |       |       |       |       |       |       |
| Candidatus Carsonella ruddii strain BT chromosome... | (62063) | 62063                                                                           | 62073 | 62084 | 62095 | 62106 | 62117 | 62128 | 62139 |
|                                                      | (62063) | TAATTTTAATTTATTAACTAAATATTATTTTTTTGTAAAAATATTTTATTTTATAAAAAAATTTATGGAAAAATAA    |       |       |       |       |       |       |       |
|                                                      | (1)     | -----                                                                           |       |       |       |       |       |       |       |
| Candidatus Carsonella 135557 - 167442nt              | (1)     | -----                                                                           |       |       |       |       |       |       |       |
| SARS-CoV-2 Reference Genome NC_045512.2              | (1)     | -----                                                                           |       |       |       |       |       |       |       |
|                                                      |         | Section 808                                                                     |       |       |       |       |       |       |       |
| Candidatus Carsonella ruddii strain BT chromosome... | (62140) | 62140                                                                           | 62150 | 62161 | 62172 | 62183 | 62194 | 62205 | 62216 |
|                                                      | (62140) | TATTTAATTTTTTTTTTAAATATAATTTCTAAATTTCAAATTTTATATCTATTATTAATAAAAAAAAAATTTTTTTTA  |       |       |       |       |       |       |       |
|                                                      | (1)     | -----                                                                           |       |       |       |       |       |       |       |
| Candidatus Carsonella 135557 - 167442nt              | (1)     | -----                                                                           |       |       |       |       |       |       |       |
| SARS-CoV-2 Reference Genome NC_045512.2              | (1)     | -----                                                                           |       |       |       |       |       |       |       |
|                                                      |         | Section 809                                                                     |       |       |       |       |       |       |       |
| Candidatus Carsonella ruddii strain BT chromosome... | (62217) | 62217                                                                           | 62227 | 62238 | 62249 | 62260 | 62271 | 62282 | 62293 |
|                                                      | (62217) | AAATTTTATAATATTAATATATATTTTATAAAAAAAAAAATTTCTTGTTTAAAAAAATTTTTTTTTTAAAAAATAT    |       |       |       |       |       |       |       |
|                                                      | (1)     | -----                                                                           |       |       |       |       |       |       |       |
| Candidatus Carsonella 135557 - 167442nt              | (1)     | -----                                                                           |       |       |       |       |       |       |       |
| SARS-CoV-2 Reference Genome NC_045512.2              | (1)     | -----                                                                           |       |       |       |       |       |       |       |
|                                                      |         | Section 810                                                                     |       |       |       |       |       |       |       |
| Candidatus Carsonella ruddii strain BT chromosome... | (62294) | 62294                                                                           | 62304 | 62315 | 62326 | 62337 | 62348 | 62359 | 62370 |
|                                                      | (62294) | TTTTATTTTTGAATCATTAATTTTAAACCATAATGATTTATTTAAAGATAATATATTATTTTTTGGAAATAAGATAT   |       |       |       |       |       |       |       |
|                                                      | (1)     | -----                                                                           |       |       |       |       |       |       |       |
| Candidatus Carsonella 135557 - 167442nt              | (1)     | -----                                                                           |       |       |       |       |       |       |       |
| SARS-CoV-2 Reference Genome NC_045512.2              | (1)     | -----                                                                           |       |       |       |       |       |       |       |

|                                                      |         |                                                                               |       |       |       |       |       |       |       |
|------------------------------------------------------|---------|-------------------------------------------------------------------------------|-------|-------|-------|-------|-------|-------|-------|
| Section 811                                          |         |                                                                               |       |       |       |       |       |       |       |
| Candidatus Carsonella ruddii strain BT chromosome... | (62371) | 62371                                                                         | 62381 | 62392 | 62403 | 62414 | 62425 | 62436 | 62447 |
|                                                      | (62371) | CATCTATTATTGATTTTAAATAATTATTGTTTTTATCAATAAATAATGATTTAATTAATTTAATTTTAGAATTTACA |       |       |       |       |       |       |       |
|                                                      | (1)     | -----                                                                         |       |       |       |       |       |       |       |
|                                                      | (1)     | -----                                                                         |       |       |       |       |       |       |       |
| Candidatus Carsonella 135557 - 167442nt              | (1)     | -----                                                                         |       |       |       |       |       |       |       |
| SARS-CoV-2 Reference Genome NC_045512.2              | (1)     | -----                                                                         |       |       |       |       |       |       |       |
| Section 812                                          |         |                                                                               |       |       |       |       |       |       |       |
| Candidatus Carsonella ruddii strain BT chromosome... | (62448) | 62448                                                                         | 62458 | 62469 | 62480 | 62491 | 62502 | 62513 | 62524 |
|                                                      | (62448) | GAAAATTATTTAATTAAAAAAACATAATATTAGAAAATTATTACAAAAAAACAAAAATATTAAAATAAAAGATTT   |       |       |       |       |       |       |       |
|                                                      | (1)     | -----                                                                         |       |       |       |       |       |       |       |
|                                                      | (1)     | -----                                                                         |       |       |       |       |       |       |       |
| Candidatus Carsonella 135557 - 167442nt              | (1)     | -----                                                                         |       |       |       |       |       |       |       |
| SARS-CoV-2 Reference Genome NC_045512.2              | (1)     | -----                                                                         |       |       |       |       |       |       |       |
| Section 813                                          |         |                                                                               |       |       |       |       |       |       |       |
| Candidatus Carsonella ruddii strain BT chromosome... | (62525) | 62525                                                                         | 62535 | 62546 | 62557 | 62568 | 62579 | 62590 | 62601 |
|                                                      | (62525) | TTTTATATTAAAAATTTTTATATTAAGAAAAAAAAAATGATATTATTTAAAAAAACAAAAATCCAAATAATTATT   |       |       |       |       |       |       |       |
|                                                      | (1)     | -----                                                                         |       |       |       |       |       |       |       |
|                                                      | (1)     | -----                                                                         |       |       |       |       |       |       |       |
| Candidatus Carsonella 135557 - 167442nt              | (1)     | -----                                                                         |       |       |       |       |       |       |       |
| SARS-CoV-2 Reference Genome NC_045512.2              | (1)     | -----                                                                         |       |       |       |       |       |       |       |
| Section 814                                          |         |                                                                               |       |       |       |       |       |       |       |
| Candidatus Carsonella ruddii strain BT chromosome... | (62602) | 62602                                                                         | 62612 | 62623 | 62634 | 62645 | 62656 | 62667 | 62678 |
|                                                      | (62602) | TAAAAAATATTTTTATGAAAAAATTTTTGAATATAAAAAATTAATAATATAGATATATTAAAAAATGGAATTTAAT  |       |       |       |       |       |       |       |
|                                                      | (1)     | -----                                                                         |       |       |       |       |       |       |       |
|                                                      | (1)     | -----                                                                         |       |       |       |       |       |       |       |
| Candidatus Carsonella 135557 - 167442nt              | (1)     | -----                                                                         |       |       |       |       |       |       |       |
| SARS-CoV-2 Reference Genome NC_045512.2              | (1)     | -----                                                                         |       |       |       |       |       |       |       |
| Section 815                                          |         |                                                                               |       |       |       |       |       |       |       |
| Candidatus Carsonella ruddii strain BT chromosome... | (62679) | 62679                                                                         | 62689 | 62700 | 62711 | 62722 | 62733 | 62744 | 62755 |
|                                                      | (62679) | TTGGAATTGCGGTTTTTATATTAAAAAAGTTTATTATTAATTAATGAAGGATCTTCATCAATAAATTATTCACAAC  |       |       |       |       |       |       |       |
|                                                      | (1)     | -----                                                                         |       |       |       |       |       |       |       |
|                                                      | (1)     | -----                                                                         |       |       |       |       |       |       |       |
| Candidatus Carsonella 135557 - 167442nt              | (1)     | -----                                                                         |       |       |       |       |       |       |       |
| SARS-CoV-2 Reference Genome NC_045512.2              | (1)     | -----                                                                         |       |       |       |       |       |       |       |
| Section 816                                          |         |                                                                               |       |       |       |       |       |       |       |
| Candidatus Carsonella ruddii strain BT chromosome... | (62756) | 62756                                                                         | 62766 | 62777 | 62788 | 62799 | 62810 | 62821 | 62832 |
|                                                      | (62756) | AATGTTTTGAAGGTGTTAAATGTTTTTTAAAAAATTTTTTTCATTTTAGAATTAATTTAAATTCTTATAGA       |       |       |       |       |       |       |       |
|                                                      | (1)     | -----                                                                         |       |       |       |       |       |       |       |
|                                                      | (1)     | -----                                                                         |       |       |       |       |       |       |       |
| Candidatus Carsonella 135557 - 167442nt              | (1)     | -----                                                                         |       |       |       |       |       |       |       |
| SARS-CoV-2 Reference Genome NC_045512.2              | (1)     | -----                                                                         |       |       |       |       |       |       |       |



## SARS-CoV-2 &amp; Bakterien.apr

|                                                      |         |                                                                                 |       |       |       |       |       |       |       |
|------------------------------------------------------|---------|---------------------------------------------------------------------------------|-------|-------|-------|-------|-------|-------|-------|
|                                                      |         | Section 817                                                                     |       |       |       |       |       |       |       |
| Candidatus Carsonella ruddii strain BT chromosome... | (62833) | 62833                                                                           | 62843 | 62854 | 62865 | 62876 | 62887 | 62898 | 62909 |
|                                                      | (62833) | TTTCAAAAAAGTTGTAAATATTTATTTTTTACCAATAATAAATAATTTTATTTTTTAAAAATCTATAAAAAATAACATC |       |       |       |       |       |       |       |
|                                                      | (1)     | -----                                                                           |       |       |       |       |       |       |       |
| Candidatus Carsonella 135557 - 167442nt              | (1)     | -----                                                                           |       |       |       |       |       |       |       |
| SARS-CoV-2 Reference Genome NC_045512.2              | (1)     | -----                                                                           |       |       |       |       |       |       |       |
|                                                      |         | Section 818                                                                     |       |       |       |       |       |       |       |
| Candidatus Carsonella ruddii strain BT chromosome... | (62910) | 62910                                                                           | 62920 | 62931 | 62942 | 62953 | 62964 | 62975 | 62986 |
|                                                      | (62910) | ATATTTAAATTTCAAATATATACCAAATTTAAAAATTGGTTTTTATATATTAGACCTTTATTAATTGGTGTGGAA     |       |       |       |       |       |       |       |
|                                                      | (1)     | -----                                                                           |       |       |       |       |       |       |       |
| Candidatus Carsonella 135557 - 167442nt              | (1)     | -----                                                                           |       |       |       |       |       |       |       |
| SARS-CoV-2 Reference Genome NC_045512.2              | (1)     | -----                                                                           |       |       |       |       |       |       |       |
|                                                      |         | Section 819                                                                     |       |       |       |       |       |       |       |
| Candidatus Carsonella ruddii strain BT chromosome... | (62987) | 62987                                                                           | 62997 | 63008 | 63019 | 63030 | 63041 | 63052 | 63063 |
|                                                      | (62987) | AAAATATAGGAGTAAAAACTTCAAAAAATTTATTTTTTACAATTTTTGTACACCTTCTTTTTTAACATTTAAAAAA    |       |       |       |       |       |       |       |
|                                                      | (1)     | -----                                                                           |       |       |       |       |       |       |       |
| Candidatus Carsonella 135557 - 167442nt              | (1)     | -----                                                                           |       |       |       |       |       |       |       |
| SARS-CoV-2 Reference Genome NC_045512.2              | (1)     | -----                                                                           |       |       |       |       |       |       |       |
|                                                      |         | Section 820                                                                     |       |       |       |       |       |       |       |
| Candidatus Carsonella ruddii strain BT chromosome... | (63064) | 63064                                                                           | 63074 | 63085 | 63096 | 63107 | 63118 | 63129 | 63140 |
|                                                      | (63064) | CAATTTATAAAATCAATATTTTTTAAAAAGAATTATAGAAAATAATGGACATTATAAAATAGGTTGTAATTATATAAC  |       |       |       |       |       |       |       |
|                                                      | (1)     | -----                                                                           |       |       |       |       |       |       |       |
| Candidatus Carsonella 135557 - 167442nt              | (1)     | -----                                                                           |       |       |       |       |       |       |       |
| SARS-CoV-2 Reference Genome NC_045512.2              | (1)     | -----                                                                           |       |       |       |       |       |       |       |
|                                                      |         | Section 821                                                                     |       |       |       |       |       |       |       |
| Candidatus Carsonella ruddii strain BT chromosome... | (63141) | 63141                                                                           | 63151 | 63162 | 63173 | 63184 | 63195 | 63206 | 63217 |
|                                                      | (63141) | AAATATATATAATAATTTTTTTTTTAAAAAATATAATTTTGATGATTATATTCATTTAAATAATAATTATTTTGAAG   |       |       |       |       |       |       |       |
|                                                      | (1)     | -----                                                                           |       |       |       |       |       |       |       |
| Candidatus Carsonella 135557 - 167442nt              | (1)     | -----                                                                           |       |       |       |       |       |       |       |
| SARS-CoV-2 Reference Genome NC_045512.2              | (1)     | -----                                                                           |       |       |       |       |       |       |       |
|                                                      |         | Section 822                                                                     |       |       |       |       |       |       |       |
| Candidatus Carsonella ruddii strain BT chromosome... | (63218) | 63218                                                                           | 63228 | 63239 | 63250 | 63261 | 63272 | 63283 | 63294 |
|                                                      | (63218) | AAATAGGAACCTTCAAATATAATTTTATATTTAAAAAAATTTTTTTATCTCCTTCTAATAAAAAATATACTTCCTGGA  |       |       |       |       |       |       |       |
|                                                      | (1)     | -----                                                                           |       |       |       |       |       |       |       |
| Candidatus Carsonella 135557 - 167442nt              | (1)     | -----                                                                           |       |       |       |       |       |       |       |
| SARS-CoV-2 Reference Genome NC_045512.2              | (1)     | -----                                                                           |       |       |       |       |       |       |       |

|                                                      |         |                                                                                 |       |       |       |       |       |             |
|------------------------------------------------------|---------|---------------------------------------------------------------------------------|-------|-------|-------|-------|-------|-------------|
|                                                      |         | Section 823                                                                     |       |       |       |       |       |             |
| Candidatus Carsonella ruddii strain BT chromosome... | (63295) | 63295                                                                           | 63305 | 63316 | 63327 | 63338 | 63349 | 63360 63371 |
|                                                      | (63295) | ATAAACAAATTTTCTTTTTTAACTTTTTTTAATAAAAAAAAAATTTTTTTAAATATAAATATATCATTTAATATAAT   |       |       |       |       |       |             |
|                                                      | (1)     | -----                                                                           |       |       |       |       |       |             |
| Candidatus Carsonella 135557 - 167442nt              | (1)     | -----                                                                           |       |       |       |       |       |             |
| SARS-CoV-2 Reference Genome NC_045512.2              | (1)     | -----                                                                           |       |       |       |       |       |             |
|                                                      |         | Section 824                                                                     |       |       |       |       |       |             |
| Candidatus Carsonella ruddii strain BT chromosome... | (63372) | 63372                                                                           | 63382 | 63393 | 63404 | 63415 | 63426 | 63437 63448 |
|                                                      | (63372) | AAATAATAGCGTTAATATTATTTCTTGTTGGAACAGCAATTTTTTATAAAAAATAATAAATTCATTTTATTTAAAAATA |       |       |       |       |       |             |
|                                                      | (1)     | -----                                                                           |       |       |       |       |       |             |
| Candidatus Carsonella 135557 - 167442nt              | (1)     | -----                                                                           |       |       |       |       |       |             |
| SARS-CoV-2 Reference Genome NC_045512.2              | (1)     | -----                                                                           |       |       |       |       |       |             |
|                                                      |         | Section 825                                                                     |       |       |       |       |       |             |
| Candidatus Carsonella ruddii strain BT chromosome... | (63449) | 63449                                                                           | 63459 | 63470 | 63481 | 63492 | 63503 | 63514 63525 |
|                                                      | (63449) | AAATTATAAAATATAAAAAAGTTTTTTGTTTTTTTTTATAAATTTTTTTTTTAAAAAAATATATAATTGTTTATAT    |       |       |       |       |       |             |
|                                                      | (1)     | -----                                                                           |       |       |       |       |       |             |
| Candidatus Carsonella 135557 - 167442nt              | (1)     | -----                                                                           |       |       |       |       |       |             |
| SARS-CoV-2 Reference Genome NC_045512.2              | (1)     | -----                                                                           |       |       |       |       |       |             |
|                                                      |         | Section 826                                                                     |       |       |       |       |       |             |
| Candidatus Carsonella ruddii strain BT chromosome... | (63526) | 63526                                                                           | 63536 | 63547 | 63558 | 63569 | 63580 | 63591 63602 |
|                                                      | (63526) | AAAATTAATAAATGGATTTTTTAAAATTAATTAATAAATTTTAAAAATTTTAAAAAAATATTTTTTTTTTAAAA      |       |       |       |       |       |             |
|                                                      | (1)     | -----                                                                           |       |       |       |       |       |             |
| Candidatus Carsonella 135557 - 167442nt              | (1)     | -----                                                                           |       |       |       |       |       |             |
| SARS-CoV-2 Reference Genome NC_045512.2              | (1)     | -----                                                                           |       |       |       |       |       |             |
|                                                      |         | Section 827                                                                     |       |       |       |       |       |             |
| Candidatus Carsonella ruddii strain BT chromosome... | (63603) | 63603                                                                           | 63613 | 63624 | 63635 | 63646 | 63657 | 63668 63679 |
|                                                      | (63603) | AAAATAAAAAAAAAAAGTTTTTTTTTTATAAATTTTAAATAATTAATAAATATTTATTTTATTACAAATATAA       |       |       |       |       |       |             |
|                                                      | (1)     | -----                                                                           |       |       |       |       |       |             |
| Candidatus Carsonella 135557 - 167442nt              | (1)     | -----                                                                           |       |       |       |       |       |             |
| SARS-CoV-2 Reference Genome NC_045512.2              | (1)     | -----                                                                           |       |       |       |       |       |             |
|                                                      |         | Section 828                                                                     |       |       |       |       |       |             |
| Candidatus Carsonella ruddii strain BT chromosome... | (63680) | 63680                                                                           | 63690 | 63701 | 63712 | 63723 | 63734 | 63745 63756 |
|                                                      | (63680) | AATTAAACATTATAAAAAATATAAAAAATTTTTTTTATAAAAAAAGAAAATTAACAACAATTAAAAAAATATTAAAAA  |       |       |       |       |       |             |
|                                                      | (1)     | -----                                                                           |       |       |       |       |       |             |
| Candidatus Carsonella 135557 - 167442nt              | (1)     | -----                                                                           |       |       |       |       |       |             |
| SARS-CoV-2 Reference Genome NC_045512.2              | (1)     | -----                                                                           |       |       |       |       |       |             |

|                                                      |         |                                                                                 |       |       |       |       |       |       |       |
|------------------------------------------------------|---------|---------------------------------------------------------------------------------|-------|-------|-------|-------|-------|-------|-------|
| Section 829                                          |         |                                                                                 |       |       |       |       |       |       |       |
| Candidatus Carsonella ruddii strain BT chromosome... | (63757) | 63757                                                                           | 63767 | 63778 | 63789 | 63800 | 63811 | 63822 | 63833 |
| Candidatus Carsonella 135557 - 167442nt              | (63757) | TATTATGCTTTTAAAAATATTAAGTATAAAAGATAAAAGATTAAGAAAAAAATCAAAAAAAATGTTTTTTTATAATA   |       |       |       |       |       |       |       |
| SARS-CoV-2 Reference Genome NC_045512.2              | (1)     | -----                                                                           |       |       |       |       |       |       |       |
|                                                      | (1)     | -----                                                                           |       |       |       |       |       |       |       |
| Section 830                                          |         |                                                                                 |       |       |       |       |       |       |       |
| Candidatus Carsonella ruddii strain BT chromosome... | (63834) | 63834                                                                           | 63844 | 63855 | 63866 | 63877 | 63888 | 63899 | 63910 |
| Candidatus Carsonella 135557 - 167442nt              | (63834) | AAATTAAAAAAATATTTTTTAATTAAAAAGAATGATTTTTTACAATGTATGAAAAAAGGGAATTGGAATTTCTTCTACT |       |       |       |       |       |       |       |
| SARS-CoV-2 Reference Genome NC_045512.2              | (1)     | -----                                                                           |       |       |       |       |       |       |       |
|                                                      | (1)     | -----                                                                           |       |       |       |       |       |       |       |
| Section 831                                          |         |                                                                                 |       |       |       |       |       |       |       |
| Candidatus Carsonella ruddii strain BT chromosome... | (63911) | 63911                                                                           | 63921 | 63932 | 63943 | 63954 | 63965 | 63976 | 63987 |
| Candidatus Carsonella 135557 - 167442nt              | (63911) | CAAATTAATTTTAAAAATAAAATAATTATAGTTGATTTAAATAAAAAAATAAACCAAGTATAATTATAAATCCTTC    |       |       |       |       |       |       |       |
| SARS-CoV-2 Reference Genome NC_045512.2              | (1)     | -----                                                                           |       |       |       |       |       |       |       |
|                                                      | (1)     | -----                                                                           |       |       |       |       |       |       |       |
| Section 832                                          |         |                                                                                 |       |       |       |       |       |       |       |
| Candidatus Carsonella ruddii strain BT chromosome... | (63988) | 63988                                                                           | 63998 | 64009 | 64020 | 64031 | 64042 | 64053 | 64064 |
| Candidatus Carsonella 135557 - 167442nt              | (63988) | AGTAATAAAAAATAGTAGTTTAATTACTTTAAGTACTGAAGGTTGTTTATCTATTAAAAATTTTTTTATAAATATTC   |       |       |       |       |       |       |       |
| SARS-CoV-2 Reference Genome NC_045512.2              | (1)     | -----                                                                           |       |       |       |       |       |       |       |
|                                                      | (1)     | -----                                                                           |       |       |       |       |       |       |       |
| Section 833                                          |         |                                                                                 |       |       |       |       |       |       |       |
| Candidatus Carsonella ruddii strain BT chromosome... | (64065) | 64065                                                                           | 64075 | 64086 | 64097 | 64108 | 64119 | 64130 | 64141 |
| Candidatus Carsonella 135557 - 167442nt              | (64065) | CTAGACCTGAAAAAATATTTTTAAATTTTGTAATTTTATATAATAAAATTAATAAATATAAAT                 |       |       |       |       |       |       |       |
| SARS-CoV-2 Reference Genome NC_045512.2              | (1)     | -----                                                                           |       |       |       |       |       |       |       |
|                                                      | (1)     | -----                                                                           |       |       |       |       |       |       |       |
| Section 834                                          |         |                                                                                 |       |       |       |       |       |       |       |
| Candidatus Carsonella ruddii strain BT chromosome... | (64142) | 64142                                                                           | 64152 | 64163 | 64174 | 64185 | 64196 | 64207 | 64218 |
| Candidatus Carsonella 135557 - 167442nt              | (64142) | TCAAGATGTTTACAACATGAGATAGATCATTTAAATGGTATATTAATAATAGATTATAATAATAAATAAATAA       |       |       |       |       |       |       |       |
| SARS-CoV-2 Reference Genome NC_045512.2              | (1)     | -----                                                                           |       |       |       |       |       |       |       |
|                                                      | (1)     | -----                                                                           |       |       |       |       |       |       |       |

|                                                      |         |                                                                                  |       |       |       |       |       |       |       |
|------------------------------------------------------|---------|----------------------------------------------------------------------------------|-------|-------|-------|-------|-------|-------|-------|
|                                                      |         | Section 835                                                                      |       |       |       |       |       |       |       |
| Candidatus Carsonella ruddii strain BT chromosome... | (64219) | 64219                                                                            | 64229 | 64240 | 64251 | 64262 | 64273 | 64284 | 64295 |
|                                                      | (64219) | ATGAATAAATTATGGGGAGGAAGATTTGAAAATCAATTAGATTATGATATTGAGATTTATTTAAATTCATTTTATAT    |       |       |       |       |       |       |       |
|                                                      | (1)     | -----                                                                            |       |       |       |       |       |       |       |
|                                                      | (1)     | -----                                                                            |       |       |       |       |       |       |       |
|                                                      |         | Section 836                                                                      |       |       |       |       |       |       |       |
| Candidatus Carsonella ruddii strain BT chromosome... | (64296) | 64296                                                                            | 64306 | 64317 | 64328 | 64339 | 64350 | 64361 | 64372 |
|                                                      | (64296) | AGATAAATATTTATTTAATTATGAAATAAAAGTAATTAGTGCACATGTAAAAAGTTTATATTTGTGTAATTATATAA    |       |       |       |       |       |       |       |
|                                                      | (1)     | -----                                                                            |       |       |       |       |       |       |       |
|                                                      | (1)     | -----                                                                            |       |       |       |       |       |       |       |
|                                                      |         | Section 837                                                                      |       |       |       |       |       |       |       |
| Candidatus Carsonella ruddii strain BT chromosome... | (64373) | 64373                                                                            | 64383 | 64394 | 64405 | 64416 | 64427 | 64438 | 64449 |
|                                                      | (64373) | AATTAAATGAAAAAAAAACAAATTTTAAATTCCTTTGTTTTTAATTAAAAATAATTTTAGAAAAATTAAATGTAGAAGAT |       |       |       |       |       |       |       |
|                                                      | (1)     | -----                                                                            |       |       |       |       |       |       |       |
|                                                      | (1)     | -----                                                                            |       |       |       |       |       |       |       |
|                                                      |         | Section 838                                                                      |       |       |       |       |       |       |       |
| Candidatus Carsonella ruddii strain BT chromosome... | (64450) | 64450                                                                            | 64460 | 64471 | 64482 | 64493 | 64504 | 64515 | 64526 |
|                                                      | (64450) | ATACATTCTTATTTAGAATTAGAATTAATAAAGTATAATGGTGATTTAGGAAAAAAAAATATATATTGGAAAAATCAAG  |       |       |       |       |       |       |       |
|                                                      | (1)     | -----                                                                            |       |       |       |       |       |       |       |
|                                                      | (1)     | -----                                                                            |       |       |       |       |       |       |       |
|                                                      |         | Section 839                                                                      |       |       |       |       |       |       |       |
| Candidatus Carsonella ruddii strain BT chromosome... | (64527) | 64527                                                                            | 64537 | 64548 | 64559 | 64570 | 64581 | 64592 | 64603 |
|                                                      | (64527) | AAATGATCAAATCACTACTTTAAATAAATTAATGTTATTGGATGAAATTGAAAAAATTAATATTTTATTAATATTCA    |       |       |       |       |       |       |       |
|                                                      | (1)     | -----                                                                            |       |       |       |       |       |       |       |
|                                                      | (1)     | -----                                                                            |       |       |       |       |       |       |       |
|                                                      |         | Section 840                                                                      |       |       |       |       |       |       |       |
| Candidatus Carsonella ruddii strain BT chromosome... | (64604) | 64604                                                                            | 64614 | 64625 | 64636 | 64647 | 64658 | 64669 | 64680 |
|                                                      | (64604) | TAAGAAAAACAATTATTAATTTAGCAGAAATTGAATTTAATACACCTGTACCTGGTTTTACTCATTTACAAATAGCT    |       |       |       |       |       |       |       |
|                                                      | (1)     | -----                                                                            |       |       |       |       |       |       |       |
|                                                      | (1)     | -----                                                                            |       |       |       |       |       |       |       |

|                                                      |         |                                                                                 |       |       |       |       |       |       |       |
|------------------------------------------------------|---------|---------------------------------------------------------------------------------|-------|-------|-------|-------|-------|-------|-------|
| Section 841                                          |         |                                                                                 |       |       |       |       |       |       |       |
| Candidatus Carsonella ruddii strain BT chromosome... | (64681) | 64681                                                                           | 64691 | 64702 | 64713 | 64724 | 64735 | 64746 | 64757 |
|                                                      | (64681) | CAACCTATAACATTAGGACATTATTTATTATCCTGGAATGAAATGTTAAAAAGAGATCATATAAATCTTTTAAATTG   |       |       |       |       |       |       |       |
|                                                      | (1)     | -----                                                                           |       |       |       |       |       |       |       |
|                                                      | (1)     | -----                                                                           |       |       |       |       |       |       |       |
| Section 842                                          |         |                                                                                 |       |       |       |       |       |       |       |
| Candidatus Carsonella ruddii strain BT chromosome... | (64758) | 64758                                                                           | 64768 | 64779 | 64790 | 64801 | 64812 | 64823 | 64834 |
|                                                      | (64758) | TAAAAAAACACAAATTTTGTCTTTAGGATCAGCAGCATTAGCTGGGCATAATTATAAAATTAATAGAAATATTG      |       |       |       |       |       |       |       |
|                                                      | (1)     | -----                                                                           |       |       |       |       |       |       |       |
|                                                      | (1)     | -----                                                                           |       |       |       |       |       |       |       |
| Section 843                                          |         |                                                                                 |       |       |       |       |       |       |       |
| Candidatus Carsonella ruddii strain BT chromosome... | (64835) | 64835                                                                           | 64845 | 64856 | 64867 | 64878 | 64889 | 64900 | 64911 |
|                                                      | (64835) | TTAAAAAAATATTAAATTTTAAATATTTAACAGAAAATTCAATAGATGCAGTTAGTGATAGAGATTATGTTATATTA   |       |       |       |       |       |       |       |
|                                                      | (1)     | -----                                                                           |       |       |       |       |       |       |       |
|                                                      | (1)     | -----                                                                           |       |       |       |       |       |       |       |
| Section 844                                          |         |                                                                                 |       |       |       |       |       |       |       |
| Candidatus Carsonella ruddii strain BT chromosome... | (64912) | 64912                                                                           | 64922 | 64933 | 64944 | 64955 | 64966 | 64977 | 64988 |
|                                                      | (64912) | TTTTCTCAATTTTGTAAATATTCTAATTATTCATTTATCTAGAATTTGTGAAGATATGATTATTTGGAGTAGTAATAA  |       |       |       |       |       |       |       |
|                                                      | (1)     | -----                                                                           |       |       |       |       |       |       |       |
|                                                      | (1)     | -----                                                                           |       |       |       |       |       |       |       |
| Section 845                                          |         |                                                                                 |       |       |       |       |       |       |       |
| Candidatus Carsonella ruddii strain BT chromosome... | (64989) | 64989                                                                           | 64999 | 65010 | 65021 | 65032 | 65043 | 65054 | 65065 |
|                                                      | (64989) | ATTTAATTTTTTAAAAATTATCAGACAAGATATCTTCTGGATCTTCTATTATGCCTCAAAAAAAAAAATCCAGATTTAT |       |       |       |       |       |       |       |
|                                                      | (1)     | -----                                                                           |       |       |       |       |       |       |       |
|                                                      | (1)     | -----                                                                           |       |       |       |       |       |       |       |
| Section 846                                          |         |                                                                                 |       |       |       |       |       |       |       |
| Candidatus Carsonella ruddii strain BT chromosome... | (65066) | 65066                                                                           | 65076 | 65087 | 65098 | 65109 | 65120 | 65131 | 65142 |
|                                                      | (65066) | TTGAATTAATTAGATCAAAATCTGGTAGAATTATGGGAAATTCAGTTAATATTTTAACTATTTTAAATCACAAGCA    |       |       |       |       |       |       |       |
|                                                      | (1)     | -----                                                                           |       |       |       |       |       |       |       |
|                                                      | (1)     | -----                                                                           |       |       |       |       |       |       |       |

|                                                      |         |                                                                               |       |       |       |       |       |       |       |
|------------------------------------------------------|---------|-------------------------------------------------------------------------------|-------|-------|-------|-------|-------|-------|-------|
|                                                      |         | Section 847                                                                   |       |       |       |       |       |       |       |
| Candidatus Carsonella ruddii strain BT chromosome... | (65143) | 65143                                                                         | 65153 | 65164 | 65175 | 65186 | 65197 | 65208 | 65219 |
|                                                      | (65143) | TTATCTTATAATAAGATAATCAAGAAGATAAGAAAGTTTATTTGATAATATTTATACAATAAAAAATACTTTAAA   |       |       |       |       |       |       |       |
|                                                      | (1)     | -----                                                                         |       |       |       |       |       |       |       |
| Candidatus Carsonella 135557 - 167442nt              | (1)     | -----                                                                         |       |       |       |       |       |       |       |
| SARS-CoV-2 Reference Genome NC_045512.2              | (1)     | -----                                                                         |       |       |       |       |       |       |       |
|                                                      |         | Section 848                                                                   |       |       |       |       |       |       |       |
| Candidatus Carsonella ruddii strain BT chromosome... | (65220) | 65220                                                                         | 65230 | 65241 | 65252 | 65263 | 65274 | 65285 | 65296 |
|                                                      | (65220) | TTGTTTTAGAAAATGCATTTTAGTATTAAAAATTAATAAAAAAATATGTATTTATCTACTTTAAAAAATTATTCTA  |       |       |       |       |       |       |       |
|                                                      | (1)     | -----                                                                         |       |       |       |       |       |       |       |
| Candidatus Carsonella 135557 - 167442nt              | (1)     | -----                                                                         |       |       |       |       |       |       |       |
| SARS-CoV-2 Reference Genome NC_045512.2              | (1)     | -----                                                                         |       |       |       |       |       |       |       |
|                                                      |         | Section 849                                                                   |       |       |       |       |       |       |       |
| Candidatus Carsonella ruddii strain BT chromosome... | (65297) | 65297                                                                         | 65307 | 65318 | 65329 | 65340 | 65351 | 65362 | 65373 |
|                                                      | (65297) | CCGCAACTGATATGGCTGATTATTTAGTTAAAAAAGGTCTAACTTTTAGAGATTCTCATAAAATTGTAGGTAATTGT |       |       |       |       |       |       |       |
|                                                      | (1)     | -----                                                                         |       |       |       |       |       |       |       |
| Candidatus Carsonella 135557 - 167442nt              | (1)     | -----                                                                         |       |       |       |       |       |       |       |
| SARS-CoV-2 Reference Genome NC_045512.2              | (1)     | -----                                                                         |       |       |       |       |       |       |       |
|                                                      |         | Section 850                                                                   |       |       |       |       |       |       |       |
| Candidatus Carsonella ruddii strain BT chromosome... | (65374) | 65374                                                                         | 65384 | 65395 | 65406 | 65417 | 65428 | 65439 | 65450 |
|                                                      | (65374) | ATTAAATATTGTGAAAATAATGATATTAATTTTTTTAATATTTTCATTAAGAATTAAAAATTATTTGTAATTTATT  |       |       |       |       |       |       |       |
|                                                      | (1)     | -----                                                                         |       |       |       |       |       |       |       |
| Candidatus Carsonella 135557 - 167442nt              | (1)     | -----                                                                         |       |       |       |       |       |       |       |
| SARS-CoV-2 Reference Genome NC_045512.2              | (1)     | -----                                                                         |       |       |       |       |       |       |       |
|                                                      |         | Section 851                                                                   |       |       |       |       |       |       |       |
| Candidatus Carsonella ruddii strain BT chromosome... | (65451) | 65451                                                                         | 65461 | 65472 | 65483 | 65494 | 65505 | 65516 | 65527 |
|                                                      | (65451) | TGAAAATGATATTTTTTATTTTTTATCTATTGAAGGATCAATAAAAATAAAAAACTTATGGGAGTACTTCTCCTA   |       |       |       |       |       |       |       |
|                                                      | (1)     | -----                                                                         |       |       |       |       |       |       |       |
| Candidatus Carsonella 135557 - 167442nt              | (1)     | -----                                                                         |       |       |       |       |       |       |       |
| SARS-CoV-2 Reference Genome NC_045512.2              | (1)     | -----                                                                         |       |       |       |       |       |       |       |
|                                                      |         | Section 852                                                                   |       |       |       |       |       |       |       |
| Candidatus Carsonella ruddii strain BT chromosome... | (65528) | 65528                                                                         | 65538 | 65549 | 65560 | 65571 | 65582 | 65593 | 65604 |
|                                                      | (65528) | ATCAAGTTTTAAATTCATTCAAGAGCAAAATTTTTTTTAAATAATATTATTTTAAATTTAAATGATAGAAATTA    |       |       |       |       |       |       |       |
|                                                      | (1)     | -----                                                                         |       |       |       |       |       |       |       |
| Candidatus Carsonella 135557 - 167442nt              | (1)     | -----                                                                         |       |       |       |       |       |       |       |
| SARS-CoV-2 Reference Genome NC_045512.2              | (1)     | -----                                                                         |       |       |       |       |       |       |       |

|                                                      |         |                                                                                 |       |       |       |       |       |       |       |
|------------------------------------------------------|---------|---------------------------------------------------------------------------------|-------|-------|-------|-------|-------|-------|-------|
|                                                      |         | Section 853                                                                     |       |       |       |       |       |       |       |
| Candidatus Carsonella ruddii strain BT chromosome... | (65605) | 65605                                                                           | 65615 | 65626 | 65637 | 65648 | 65659 | 65670 | 65681 |
|                                                      | (65605) | AAAATATTGAAAATAAAATATTAATTAATAAAATTTTAATAAATGTATTTTTTCAAAAATTGAATTACCTATTTAT    |       |       |       |       |       |       |       |
|                                                      | (1)     | -----                                                                           |       |       |       |       |       |       |       |
| Candidatus Carsonella 135557 - 167442nt              | (1)     | -----                                                                           |       |       |       |       |       |       |       |
| SARS-CoV-2 Reference Genome NC_045512.2              | (1)     | -----                                                                           |       |       |       |       |       |       |       |
|                                                      |         | Section 854                                                                     |       |       |       |       |       |       |       |
| Candidatus Carsonella ruddii strain BT chromosome... | (65682) | 65682                                                                           | 65692 | 65703 | 65714 | 65725 | 65736 | 65747 | 65758 |
|                                                      | (65682) | GTTTATGATTATAAAAAATAATTTTAAATTGTTTTTTTATAAAAAATTAATTTTTTTTGTTTTTTATTCAATAAA     |       |       |       |       |       |       |       |
|                                                      | (1)     | -----                                                                           |       |       |       |       |       |       |       |
| Candidatus Carsonella 135557 - 167442nt              | (1)     | -----                                                                           |       |       |       |       |       |       |       |
| SARS-CoV-2 Reference Genome NC_045512.2              | (1)     | -----                                                                           |       |       |       |       |       |       |       |
|                                                      |         | Section 855                                                                     |       |       |       |       |       |       |       |
| Candidatus Carsonella ruddii strain BT chromosome... | (65759) | 65759                                                                           | 65769 | 65780 | 65791 | 65802 | 65813 | 65824 | 65835 |
|                                                      | (65759) | ATCTAATGATAATTTATTTTTATTAAAAATAATAACAATATAATTAATAAATTTGATATTGTTTCAATTGGAGAAC    |       |       |       |       |       |       |       |
|                                                      | (1)     | -----                                                                           |       |       |       |       |       |       |       |
| Candidatus Carsonella 135557 - 167442nt              | (1)     | -----                                                                           |       |       |       |       |       |       |       |
| SARS-CoV-2 Reference Genome NC_045512.2              | (1)     | -----                                                                           |       |       |       |       |       |       |       |
|                                                      |         | Section 856                                                                     |       |       |       |       |       |       |       |
| Candidatus Carsonella ruddii strain BT chromosome... | (65836) | 65836                                                                           | 65846 | 65857 | 65868 | 65879 | 65890 | 65901 | 65912 |
|                                                      | (65836) | TTAAAAAATTTTATTAATTTCTATTAAAAACCTTATATTATTTTTCTGGAAGTGGTAAAAATATATCAGAATTA      |       |       |       |       |       |       |       |
|                                                      | (1)     | -----                                                                           |       |       |       |       |       |       |       |
| Candidatus Carsonella 135557 - 167442nt              | (1)     | -----                                                                           |       |       |       |       |       |       |       |
| SARS-CoV-2 Reference Genome NC_045512.2              | (1)     | -----                                                                           |       |       |       |       |       |       |       |
|                                                      |         | Section 857                                                                     |       |       |       |       |       |       |       |
| Candidatus Carsonella ruddii strain BT chromosome... | (65913) | 65913                                                                           | 65923 | 65934 | 65945 | 65956 | 65967 | 65978 | 65989 |
|                                                      | (65913) | TTAATTTTCATTAAATTTAAACATATTTTGTTTAAATATTGAGTCAATACAAGAATTTATAAAAAATTTTTTTTTTAAT |       |       |       |       |       |       |       |
|                                                      | (1)     | -----                                                                           |       |       |       |       |       |       |       |
| Candidatus Carsonella 135557 - 167442nt              | (1)     | -----                                                                           |       |       |       |       |       |       |       |
| SARS-CoV-2 Reference Genome NC_045512.2              | (1)     | -----                                                                           |       |       |       |       |       |       |       |
|                                                      |         | Section 858                                                                     |       |       |       |       |       |       |       |
| Candidatus Carsonella ruddii strain BT chromosome... | (65990) | 65990                                                                           | 66000 | 66011 | 66022 | 66033 | 66044 | 66055 | 66066 |
|                                                      | (65990) | AAAAAATATATAAAAAAAATTAATTTAATGATTAGAAATTAATCCTAATATTGATGCTAAACTCATGAAAAATTA     |       |       |       |       |       |       |       |
|                                                      | (1)     | -----                                                                           |       |       |       |       |       |       |       |
| Candidatus Carsonella 135557 - 167442nt              | (1)     | -----                                                                           |       |       |       |       |       |       |       |
| SARS-CoV-2 Reference Genome NC_045512.2              | (1)     | -----                                                                           |       |       |       |       |       |       |       |

|                                                      |         |                                                                                |       |       |       |       |       |       |       |
|------------------------------------------------------|---------|--------------------------------------------------------------------------------|-------|-------|-------|-------|-------|-------|-------|
| Section 859                                          |         |                                                                                |       |       |       |       |       |       |       |
| Candidatus Carsonella ruddii strain BT chromosome... | (66067) | 66067                                                                          | 66077 | 66088 | 66099 | 66110 | 66121 | 66132 | 66143 |
| Candidatus Carsonella 135557 - 167442nt              | (66067) | GTACTGGTATTAAAGTTAATAAATTTGGAATTTTCAGTAATAAATTTAAAAAATTTATTTATTTTAAATAAAATTACA |       |       |       |       |       |       |       |
| SARS-CoV-2 Reference Genome NC_045512.2              | (1)     | -----                                                                          |       |       |       |       |       |       |       |
|                                                      | (1)     | -----                                                                          |       |       |       |       |       |       |       |
| Section 860                                          |         |                                                                                |       |       |       |       |       |       |       |
| Candidatus Carsonella ruddii strain BT chromosome... | (66144) | 66144                                                                          | 66154 | 66165 | 66176 | 66187 | 66198 | 66209 | 66220 |
| Candidatus Carsonella 135557 - 167442nt              | (66144) | AAATTAAATATTATTGGTTATGATTTTCATATAGGTTCTCAAATCGAAAAATATCTCCTATTAAAAAATTATTAA    |       |       |       |       |       |       |       |
| SARS-CoV-2 Reference Genome NC_045512.2              | (1)     | -----                                                                          |       |       |       |       |       |       |       |
|                                                      | (1)     | -----                                                                          |       |       |       |       |       |       |       |
| Section 861                                          |         |                                                                                |       |       |       |       |       |       |       |
| Candidatus Carsonella ruddii strain BT chromosome... | (66221) | 66221                                                                          | 66231 | 66242 | 66253 | 66264 | 66275 | 66286 | 66297 |
| Candidatus Carsonella 135557 - 167442nt              | (66221) | TTTAATTATTAATTTATATAAAATTAATAAATTTGATTATTTAGATATAGGTGGAGGAATAGGTGTTAATTATTATA  |       |       |       |       |       |       |       |
| SARS-CoV-2 Reference Genome NC_045512.2              | (1)     | -----                                                                          |       |       |       |       |       |       |       |
|                                                      | (1)     | -----                                                                          |       |       |       |       |       |       |       |
| Section 862                                          |         |                                                                                |       |       |       |       |       |       |       |
| Candidatus Carsonella ruddii strain BT chromosome... | (66298) | 66298                                                                          | 66308 | 66319 | 66330 | 66341 | 66352 | 66363 | 66374 |
| Candidatus Carsonella 135557 - 167442nt              | (66298) | TTAATAAAAAATATTATTAAATTTTCTAATTATTATAATATAATAATTAATAATTTAAAAAATTTAATTTA        |       |       |       |       |       |       |       |
| SARS-CoV-2 Reference Genome NC_045512.2              | (1)     | -----                                                                          |       |       |       |       |       |       |       |
|                                                      | (1)     | -----                                                                          |       |       |       |       |       |       |       |
| Section 863                                          |         |                                                                                |       |       |       |       |       |       |       |
| Candidatus Carsonella ruddii strain BT chromosome... | (66375) | 66375                                                                          | 66385 | 66396 | 66407 | 66418 | 66429 | 66440 | 66451 |
| Candidatus Carsonella 135557 - 167442nt              | (66375) | AAAATTTTTTTTAGAAATTGGAAGATATTTTTTAACAAATTCATGTATATTATTTCAAAAATTAATTACATAAAATT  |       |       |       |       |       |       |       |
| SARS-CoV-2 Reference Genome NC_045512.2              | (1)     | -----                                                                          |       |       |       |       |       |       |       |
|                                                      | (1)     | -----                                                                          |       |       |       |       |       |       |       |
| Section 864                                          |         |                                                                                |       |       |       |       |       |       |       |
| Candidatus Carsonella ruddii strain BT chromosome... | (66452) | 66452                                                                          | 66462 | 66473 | 66484 | 66495 | 66506 | 66517 | 66528 |
| Candidatus Carsonella 135557 - 167442nt              | (66452) | TAATAAATCTAATAATTTAACTATTTTAAATTTAGGAATGAATGATATAATCAGACCATCTTTGTATGATTCTTATC  |       |       |       |       |       |       |       |
| SARS-CoV-2 Reference Genome NC_045512.2              | (1)     | -----                                                                          |       |       |       |       |       |       |       |
|                                                      | (1)     | -----                                                                          |       |       |       |       |       |       |       |



|                                                      |         |                                                                                |       |       |       |       |       |       |       |
|------------------------------------------------------|---------|--------------------------------------------------------------------------------|-------|-------|-------|-------|-------|-------|-------|
|                                                      |         | Section 865                                                                    |       |       |       |       |       |       |       |
| Candidatus Carsonella ruddii strain BT chromosome... | (66529) | 66529                                                                          | 66539 | 66550 | 66561 | 66572 | 66583 | 66594 | 66605 |
|                                                      | (66529) | ATAAAAATTGAAAATAATAATATAGGTAATAAAATAAAAAATTTTTTGGTCCTATATGTGAATCAAGTGATAAATTT  |       |       |       |       |       |       |       |
|                                                      | (1)     | -----                                                                          |       |       |       |       |       |       |       |
| Candidatus Carsonella 135557 - 167442nt              | (1)     | -----                                                                          |       |       |       |       |       |       |       |
| SARS-CoV-2 Reference Genome NC_045512.2              | (1)     | -----                                                                          |       |       |       |       |       |       |       |
|                                                      |         | Section 866                                                                    |       |       |       |       |       |       |       |
| Candidatus Carsonella ruddii strain BT chromosome... | (66606) | 66606                                                                          | 66616 | 66627 | 66638 | 66649 | 66660 | 66671 | 66682 |
|                                                      | (66606) | ATAAATAATAAATTTTAAATGTTAAAAATAATTCAATTATTTTTTTTTATTCTAGTGGAAGTTATTGTAAAGTTAT   |       |       |       |       |       |       |       |
|                                                      | (1)     | -----                                                                          |       |       |       |       |       |       |       |
| Candidatus Carsonella 135557 - 167442nt              | (1)     | -----                                                                          |       |       |       |       |       |       |       |
| SARS-CoV-2 Reference Genome NC_045512.2              | (1)     | -----                                                                          |       |       |       |       |       |       |       |
|                                                      |         | Section 867                                                                    |       |       |       |       |       |       |       |
| Candidatus Carsonella ruddii strain BT chromosome... | (66683) | 66683                                                                          | 66693 | 66704 | 66715 | 66726 | 66737 | 66748 | 66759 |
|                                                      | (66683) | GAGTAATAATTATAATTCATAATTTAAATTTATGAAATTATTGTTTATAAAAAATAAAATTAATAATATTTAAAA    |       |       |       |       |       |       |       |
|                                                      | (1)     | -----                                                                          |       |       |       |       |       |       |       |
| Candidatus Carsonella 135557 - 167442nt              | (1)     | -----                                                                          |       |       |       |       |       |       |       |
| SARS-CoV-2 Reference Genome NC_045512.2              | (1)     | -----                                                                          |       |       |       |       |       |       |       |
|                                                      |         | Section 868                                                                    |       |       |       |       |       |       |       |
| Candidatus Carsonella ruddii strain BT chromosome... | (66760) | 66760                                                                          | 66770 | 66781 | 66792 | 66803 | 66814 | 66825 | 66836 |
|                                                      | (66760) | TTGAAAAATTTAAAAATATAATAAAAAATTATGCTTAAATTTTAAAAATTACATGCTAATGGTAATGATTTTTTAAT  |       |       |       |       |       |       |       |
|                                                      | (1)     | -----                                                                          |       |       |       |       |       |       |       |
| Candidatus Carsonella 135557 - 167442nt              | (1)     | -----                                                                          |       |       |       |       |       |       |       |
| SARS-CoV-2 Reference Genome NC_045512.2              | (1)     | -----                                                                          |       |       |       |       |       |       |       |
|                                                      |         | Section 869                                                                    |       |       |       |       |       |       |       |
| Candidatus Carsonella ruddii strain BT chromosome... | (66837) | 66837                                                                          | 66847 | 66858 | 66869 | 66880 | 66891 | 66902 | 66913 |
|                                                      | (66837) | CATTTTTAGTTTAAAAAAAATAATTTTTTAAAAAATATTTAAATAAAAAAACTGGAATAAGTTGTGATCAATTAT    |       |       |       |       |       |       |       |
|                                                      | (1)     | -----                                                                          |       |       |       |       |       |       |       |
| Candidatus Carsonella 135557 - 167442nt              | (1)     | -----                                                                          |       |       |       |       |       |       |       |
| SARS-CoV-2 Reference Genome NC_045512.2              | (1)     | -----                                                                          |       |       |       |       |       |       |       |
|                                                      |         | Section 870                                                                    |       |       |       |       |       |       |       |
| Candidatus Carsonella ruddii strain BT chromosome... | (66914) | 66914                                                                          | 66924 | 66935 | 66946 | 66957 | 66968 | 66979 | 66990 |
|                                                      | (66914) | TTATTATAAAAAGTATAAATTATAAAAAATAAATTTATAAATATAAAAAATTTTAATAATAATTTAATTGAAGCTAAA |       |       |       |       |       |       |       |
|                                                      | (1)     | -----                                                                          |       |       |       |       |       |       |       |
| Candidatus Carsonella 135557 - 167442nt              | (1)     | -----                                                                          |       |       |       |       |       |       |       |
| SARS-CoV-2 Reference Genome NC_045512.2              | (1)     | -----                                                                          |       |       |       |       |       |       |       |

|                                                      |         |                                                                               |       |       |       |       |       |       |       |
|------------------------------------------------------|---------|-------------------------------------------------------------------------------|-------|-------|-------|-------|-------|-------|-------|
|                                                      |         | Section 871                                                                   |       |       |       |       |       |       |       |
| Candidatus Carsonella ruddii strain BT chromosome... | (66991) | 66991                                                                         | 67001 | 67012 | 67023 | 67034 | 67045 | 67056 | 67067 |
|                                                      | (66991) | AATTGTGGAATGGTATAAGATGTTTATCTTGTTTTTTTTTATTAAAAATTAAAAAATTTATTTTATTAATTTTAT   |       |       |       |       |       |       |       |
|                                                      | (1)     | -----                                                                         |       |       |       |       |       |       |       |
| Candidatus Carsonella 135557 - 167442nt              | (1)     | -----                                                                         |       |       |       |       |       |       |       |
| SARS-CoV-2 Reference Genome NC_045512.2              | (1)     | -----                                                                         |       |       |       |       |       |       |       |
|                                                      |         | Section 872                                                                   |       |       |       |       |       |       |       |
| Candidatus Carsonella ruddii strain BT chromosome... | (67068) | 67068                                                                         | 67078 | 67089 | 67100 | 67111 | 67122 | 67133 | 67144 |
|                                                      | (67068) | ATTAAATAAAAAATTTTATTTATTCTTGGAACCTAAAAAACTTTTTTACTTCTTATAAAATTCAAAAATAAATA    |       |       |       |       |       |       |       |
|                                                      | (1)     | -----                                                                         |       |       |       |       |       |       |       |
| Candidatus Carsonella 135557 - 167442nt              | (1)     | -----                                                                         |       |       |       |       |       |       |       |
| SARS-CoV-2 Reference Genome NC_045512.2              | (1)     | -----                                                                         |       |       |       |       |       |       |       |
|                                                      |         | Section 873                                                                   |       |       |       |       |       |       |       |
| Candidatus Carsonella ruddii strain BT chromosome... | (67145) | 67145                                                                         | 67155 | 67166 | 67177 | 67188 | 67199 | 67210 | 67221 |
|                                                      | (67145) | TAAAAATAATTTTTAGATTTGAAAATATTTTTTAAAAATCTTGTTTTGTAAATTTATTGAATTTACACATTATTTTT |       |       |       |       |       |       |       |
|                                                      | (1)     | -----                                                                         |       |       |       |       |       |       |       |
| Candidatus Carsonella 135557 - 167442nt              | (1)     | -----                                                                         |       |       |       |       |       |       |       |
| SARS-CoV-2 Reference Genome NC_045512.2              | (1)     | -----                                                                         |       |       |       |       |       |       |       |
|                                                      |         | Section 874                                                                   |       |       |       |       |       |       |       |
| Candidatus Carsonella ruddii strain BT chromosome... | (67222) | 67222                                                                         | 67232 | 67243 | 67254 | 67265 | 67276 | 67287 | 67298 |
|                                                      | (67222) | ATTGTTAAAAATATTAATTCTAATAATTTAATTTTTTAAAAAATAATTTTTCATTTTAAAGATAATTATAA       |       |       |       |       |       |       |       |
|                                                      | (1)     | -----                                                                         |       |       |       |       |       |       |       |
| Candidatus Carsonella 135557 - 167442nt              | (1)     | -----                                                                         |       |       |       |       |       |       |       |
| SARS-CoV-2 Reference Genome NC_045512.2              | (1)     | -----                                                                         |       |       |       |       |       |       |       |
|                                                      |         | Section 875                                                                   |       |       |       |       |       |       |       |
| Candidatus Carsonella ruddii strain BT chromosome... | (67299) | 67299                                                                         | 67309 | 67320 | 67331 | 67342 | 67353 | 67364 | 67375 |
|                                                      | (67299) | TATTGAATTTATTCAAATAATAAAAAATAATAATTTTTATATCAGAATTTTGAAAAAATGTAGGAGAAACATATT   |       |       |       |       |       |       |       |
|                                                      | (1)     | -----                                                                         |       |       |       |       |       |       |       |
| Candidatus Carsonella 135557 - 167442nt              | (1)     | -----                                                                         |       |       |       |       |       |       |       |
| SARS-CoV-2 Reference Genome NC_045512.2              | (1)     | -----                                                                         |       |       |       |       |       |       |       |
|                                                      |         | Section 876                                                                   |       |       |       |       |       |       |       |
| Candidatus Carsonella ruddii strain BT chromosome... | (67376) | 67376                                                                         | 67386 | 67397 | 67408 | 67419 | 67430 | 67441 | 67452 |
|                                                      | (67376) | CTTGTGGATCAGGAATTATAAGTTCATGTTGTTATATTAAAAAATTTTTTTTTTAAATTCAAATATTTTTATAAAT  |       |       |       |       |       |       |       |
|                                                      | (1)     | -----                                                                         |       |       |       |       |       |       |       |
| Candidatus Carsonella 135557 - 167442nt              | (1)     | -----                                                                         |       |       |       |       |       |       |       |
| SARS-CoV-2 Reference Genome NC_045512.2              | (1)     | -----                                                                         |       |       |       |       |       |       |       |

## SARS-CoV-2 &amp; Bakterien.apr

|                                                      |         |                                                                                |       |       |       |       |       |       |       |
|------------------------------------------------------|---------|--------------------------------------------------------------------------------|-------|-------|-------|-------|-------|-------|-------|
| Section 877                                          |         |                                                                                |       |       |       |       |       |       |       |
| Candidatus Carsonella ruddii strain BT chromosome... | (67453) | 67453                                                                          | 67463 | 67474 | 67485 | 67496 | 67507 | 67518 | 67529 |
| Candidatus Carsonella 135557 - 167442nt              | (67453) | TCTTTAGGAGGAAATTGTATTGTTAGTTTTAGTAAAAAATTTGTTATTATTAATGGTAAAGTTAATTTTTGTTTTTA  |       |       |       |       |       |       |       |
| SARS-CoV-2 Reference Genome NC_045512.2              | (1)     | -----                                                                          |       |       |       |       |       |       |       |
|                                                      | (1)     | -----                                                                          |       |       |       |       |       |       |       |
| Section 878                                          |         |                                                                                |       |       |       |       |       |       |       |
| Candidatus Carsonella ruddii strain BT chromosome... | (67530) | 67530                                                                          | 67540 | 67551 | 67562 | 67573 | 67584 | 67595 | 67606 |
| Candidatus Carsonella 135557 - 167442nt              | (67530) | CGGTTATATATAATGTTTAAAAAATTTTATATTATTGGAAAAATAAGTATTTTTTTTTTAATAAAAAAAGAAAA     |       |       |       |       |       |       |       |
| SARS-CoV-2 Reference Genome NC_045512.2              | (1)     | -----                                                                          |       |       |       |       |       |       |       |
|                                                      | (1)     | -----                                                                          |       |       |       |       |       |       |       |
| Section 879                                          |         |                                                                                |       |       |       |       |       |       |       |
| Candidatus Carsonella ruddii strain BT chromosome... | (67607) | 67607                                                                          | 67617 | 67628 | 67639 | 67650 | 67661 | 67672 | 67683 |
| Candidatus Carsonella 135557 - 167442nt              | (67607) | TAAATCTGGTGCAGCAACTTATAATTATATAAATGTTAATTTTTTAATTAAAAAATCATTCAAATTTATTTTA      |       |       |       |       |       |       |       |
| SARS-CoV-2 Reference Genome NC_045512.2              | (1)     | -----                                                                          |       |       |       |       |       |       |       |
|                                                      | (1)     | -----                                                                          |       |       |       |       |       |       |       |
| Section 880                                          |         |                                                                                |       |       |       |       |       |       |       |
| Candidatus Carsonella ruddii strain BT chromosome... | (67684) | 67684                                                                          | 67694 | 67705 | 67716 | 67727 | 67738 | 67749 | 67760 |
| Candidatus Carsonella 135557 - 167442nt              | (67684) | AACAAAATTGTTATCGTCAATTTGATTCTTACTTGTTTAAAAAATAAATTATCAATTCATAATCAATTACAAATA    |       |       |       |       |       |       |       |
| SARS-CoV-2 Reference Genome NC_045512.2              | (1)     | -----                                                                          |       |       |       |       |       |       |       |
|                                                      | (1)     | -----                                                                          |       |       |       |       |       |       |       |
| Section 881                                          |         |                                                                                |       |       |       |       |       |       |       |
| Candidatus Carsonella ruddii strain BT chromosome... | (67761) | 67761                                                                          | 67771 | 67782 | 67793 | 67804 | 67815 | 67826 | 67837 |
| Candidatus Carsonella 135557 - 167442nt              | (67761) | ATTTGTAAACCTATTCCAATTAATTTTTTAAACAATTTATAAAAAATCAATATTTTTTTTAAAAAATATTTTTTTTAA |       |       |       |       |       |       |       |
| SARS-CoV-2 Reference Genome NC_045512.2              | (1)     | -----                                                                          |       |       |       |       |       |       |       |
|                                                      | (1)     | -----                                                                          |       |       |       |       |       |       |       |
| Section 882                                          |         |                                                                                |       |       |       |       |       |       |       |
| Candidatus Carsonella ruddii strain BT chromosome... | (67838) | 67838                                                                          | 67848 | 67859 | 67870 | 67881 | 67892 | 67903 | 67914 |
| Candidatus Carsonella 135557 - 167442nt              | (67838) | AAAAGACAATTGGAAATCTCCTTTATTAGGAGCAAAAGGAATAGGTTATGAAGTTATTAGTAATAATATAGAAATTT  |       |       |       |       |       |       |       |
| SARS-CoV-2 Reference Genome NC_045512.2              | (1)     | -----                                                                          |       |       |       |       |       |       |       |
|                                                      | (1)     | -----                                                                          |       |       |       |       |       |       |       |

## SARS-CoV-2 &amp; Bakterien.apr

|                                                      |         |                                                                               |       |       |       |       |       |       |       |
|------------------------------------------------------|---------|-------------------------------------------------------------------------------|-------|-------|-------|-------|-------|-------|-------|
|                                                      |         | Section 883                                                                   |       |       |       |       |       |       |       |
| Candidatus Carsonella ruddii strain BT chromosome... | (67915) | 67915                                                                         | 67925 | 67936 | 67947 | 67958 | 67969 | 67980 | 67991 |
|                                                      | (67915) | CACAAATAACAATTTTTATTTTTTTGGTAATAAAAAATTAAACATTCCTATTTTAGAAATTACTTATGGTATTGAA  |       |       |       |       |       |       |       |
|                                                      | (1)     | -----                                                                         |       |       |       |       |       |       |       |
| Candidatus Carsonella 135557 - 167442nt              | (1)     | -----                                                                         |       |       |       |       |       |       |       |
| SARS-CoV-2 Reference Genome NC_045512.2              | (1)     | -----                                                                         |       |       |       |       |       |       |       |
|                                                      |         | Section 884                                                                   |       |       |       |       |       |       |       |
| Candidatus Carsonella ruddii strain BT chromosome... | (67992) | 67992                                                                         | 68002 | 68013 | 68024 | 68035 | 68046 | 68057 | 68068 |
|                                                      | (67992) | AGAATTAATAGTTTAAAAAATGTAAATTTTATAAACGAAAAATTTATATCTATAAATAATTTTTTAATAAATTTTC  |       |       |       |       |       |       |       |
|                                                      | (1)     | -----                                                                         |       |       |       |       |       |       |       |
| Candidatus Carsonella 135557 - 167442nt              | (1)     | -----                                                                         |       |       |       |       |       |       |       |
| SARS-CoV-2 Reference Genome NC_045512.2              | (1)     | -----                                                                         |       |       |       |       |       |       |       |
|                                                      |         | Section 885                                                                   |       |       |       |       |       |       |       |
| Candidatus Carsonella ruddii strain BT chromosome... | (68069) | 68069                                                                         | 68079 | 68090 | 68101 | 68112 | 68123 | 68134 | 68145 |
|                                                      | (68069) | TATTAAAAAATTATATTATTATATAATCAATGTTTATTAAATTTAAAAAATAACATTTTTATCATATTTTT       |       |       |       |       |       |       |       |
|                                                      | (1)     | -----                                                                         |       |       |       |       |       |       |       |
| Candidatus Carsonella 135557 - 167442nt              | (1)     | -----                                                                         |       |       |       |       |       |       |       |
| SARS-CoV-2 Reference Genome NC_045512.2              | (1)     | -----                                                                         |       |       |       |       |       |       |       |
|                                                      |         | Section 886                                                                   |       |       |       |       |       |       |       |
| Candidatus Carsonella ruddii strain BT chromosome... | (68146) | 68146                                                                         | 68156 | 68167 | 68178 | 68189 | 68200 | 68211 | 68222 |
|                                                      | (68146) | TTTTTATAAAAAATAACAAATTATTTTAATTTAATTGATGAATTTTATTTAATTAATAATTATAATAGAAATTAATA |       |       |       |       |       |       |       |
|                                                      | (1)     | -----                                                                         |       |       |       |       |       |       |       |
| Candidatus Carsonella 135557 - 167442nt              | (1)     | -----                                                                         |       |       |       |       |       |       |       |
| SARS-CoV-2 Reference Genome NC_045512.2              | (1)     | -----                                                                         |       |       |       |       |       |       |       |
|                                                      |         | Section 887                                                                   |       |       |       |       |       |       |       |
| Candidatus Carsonella ruddii strain BT chromosome... | (68223) | 68223                                                                         | 68233 | 68244 | 68255 | 68266 | 68277 | 68288 | 68299 |
|                                                      | (68223) | ATTAATTTGATTAAAAATTATTTCTAATAATATAAATAAAAAAATTAATGTTTGTTAAAAATATTATAAAAAAATAT |       |       |       |       |       |       |       |
|                                                      | (1)     | -----                                                                         |       |       |       |       |       |       |       |
| Candidatus Carsonella 135557 - 167442nt              | (1)     | -----                                                                         |       |       |       |       |       |       |       |
| SARS-CoV-2 Reference Genome NC_045512.2              | (1)     | -----                                                                         |       |       |       |       |       |       |       |
|                                                      |         | Section 888                                                                   |       |       |       |       |       |       |       |
| Candidatus Carsonella ruddii strain BT chromosome... | (68300) | 68300                                                                         | 68310 | 68321 | 68332 | 68343 | 68354 | 68365 | 68376 |
|                                                      | (68300) | TTAAAATAATTTTTAAAAAATTTTTTTAATATATTTTTTTTATTTTAAAAAATATATAATTAAAAAATTAATAA    |       |       |       |       |       |       |       |
|                                                      | (1)     | -----                                                                         |       |       |       |       |       |       |       |
| Candidatus Carsonella 135557 - 167442nt              | (1)     | -----                                                                         |       |       |       |       |       |       |       |
| SARS-CoV-2 Reference Genome NC_045512.2              | (1)     | -----                                                                         |       |       |       |       |       |       |       |

|                                                      |         |                                                                                 |       |       |       |       |       |       |       |
|------------------------------------------------------|---------|---------------------------------------------------------------------------------|-------|-------|-------|-------|-------|-------|-------|
|                                                      |         | Section 889                                                                     |       |       |       |       |       |       |       |
| Candidatus Carsonella ruddii strain BT chromosome... | (68377) | 68377                                                                           | 68387 | 68398 | 68409 | 68420 | 68431 | 68442 | 68453 |
|                                                      | (68377) | AAAATCAATATAAAATTAAAAATATTTTTTTATAAGTATAAAAAATTTAATTAATAATAAAAAATATTTTTTTTTATC  |       |       |       |       |       |       |       |
|                                                      | (1)     | -----                                                                           |       |       |       |       |       |       |       |
| Candidatus Carsonella 135557 - 167442nt              | (1)     | -----                                                                           |       |       |       |       |       |       |       |
| SARS-CoV-2 Reference Genome NC_045512.2              | (1)     | -----                                                                           |       |       |       |       |       |       |       |
|                                                      |         | Section 890                                                                     |       |       |       |       |       |       |       |
| Candidatus Carsonella ruddii strain BT chromosome... | (68454) | 68454                                                                           | 68464 | 68475 | 68486 | 68497 | 68508 | 68519 | 68530 |
|                                                      | (68454) | ACTTTTTTTTTAAAAAATAAAAAATATTTTTTTAATAAAAAATATTTTAAATTTTAAAAAAAATTTTTTAATATTAA   |       |       |       |       |       |       |       |
|                                                      | (1)     | -----                                                                           |       |       |       |       |       |       |       |
| Candidatus Carsonella 135557 - 167442nt              | (1)     | -----                                                                           |       |       |       |       |       |       |       |
| SARS-CoV-2 Reference Genome NC_045512.2              | (1)     | -----                                                                           |       |       |       |       |       |       |       |
|                                                      |         | Section 891                                                                     |       |       |       |       |       |       |       |
| Candidatus Carsonella ruddii strain BT chromosome... | (68531) | 68531                                                                           | 68541 | 68552 | 68563 | 68574 | 68585 | 68596 | 68607 |
|                                                      | (68531) | AAGAAAATTTTAAATTTTTTAAGAAAAATAAAAAATTTTTTATTTTTTAAAAAAAATTTTTTTTATAAATTTTAA     |       |       |       |       |       |       |       |
|                                                      | (1)     | -----                                                                           |       |       |       |       |       |       |       |
| Candidatus Carsonella 135557 - 167442nt              | (1)     | -----                                                                           |       |       |       |       |       |       |       |
| SARS-CoV-2 Reference Genome NC_045512.2              | (1)     | -----                                                                           |       |       |       |       |       |       |       |
|                                                      |         | Section 892                                                                     |       |       |       |       |       |       |       |
| Candidatus Carsonella ruddii strain BT chromosome... | (68608) | 68608                                                                           | 68618 | 68629 | 68640 | 68651 | 68662 | 68673 | 68684 |
|                                                      | (68608) | ATTTATAAAAAGAATAAAAAAAGATTTTTTTAATTTTAAATAATAATAATAAGAAACACCCAATTTAATTTTTTTTAA  |       |       |       |       |       |       |       |
|                                                      | (1)     | -----                                                                           |       |       |       |       |       |       |       |
| Candidatus Carsonella 135557 - 167442nt              | (1)     | -----                                                                           |       |       |       |       |       |       |       |
| SARS-CoV-2 Reference Genome NC_045512.2              | (1)     | -----                                                                           |       |       |       |       |       |       |       |
|                                                      |         | Section 893                                                                     |       |       |       |       |       |       |       |
| Candidatus Carsonella ruddii strain BT chromosome... | (68685) | 68685                                                                           | 68695 | 68706 | 68717 | 68728 | 68739 | 68750 | 68761 |
|                                                      | (68685) | ATATTATTGTTATTTAAATTATTTTTTTAATAAAAAAAAATATAAAAAATTTATAAATATTAGATTATCATCTTTTA   |       |       |       |       |       |       |       |
|                                                      | (1)     | -----                                                                           |       |       |       |       |       |       |       |
| Candidatus Carsonella 135557 - 167442nt              | (1)     | -----                                                                           |       |       |       |       |       |       |       |
| SARS-CoV-2 Reference Genome NC_045512.2              | (1)     | -----                                                                           |       |       |       |       |       |       |       |
|                                                      |         | Section 894                                                                     |       |       |       |       |       |       |       |
| Candidatus Carsonella ruddii strain BT chromosome... | (68762) | 68762                                                                           | 68772 | 68783 | 68794 | 68805 | 68816 | 68827 | 68838 |
|                                                      | (68762) | ATAAAATTATATTTTTATAACAATTTTTTTAATATTAAAAATTATTTAATACCTATAGAACACTATAGGAAATTAATTA |       |       |       |       |       |       |       |
|                                                      | (1)     | -----                                                                           |       |       |       |       |       |       |       |
| Candidatus Carsonella 135557 - 167442nt              | (1)     | -----                                                                           |       |       |       |       |       |       |       |
| SARS-CoV-2 Reference Genome NC_045512.2              | (1)     | -----                                                                           |       |       |       |       |       |       |       |

## SARS-CoV-2 &amp; Bakterien.apr

|                                                      |         |                                                                                |       |       |       |       |       |       |       |
|------------------------------------------------------|---------|--------------------------------------------------------------------------------|-------|-------|-------|-------|-------|-------|-------|
|                                                      |         | Section 895                                                                    |       |       |       |       |       |       |       |
| Candidatus Carsonella ruddii strain BT chromosome... | (68839) | 68839                                                                          | 68849 | 68860 | 68871 | 68882 | 68893 | 68904 | 68915 |
|                                                      | (68839) | AATAATTTTAAATATTCGATGCTTGTAATCCTTTTTTACCTTGAGTAACATCAAAACTCACTCTTTGTCCATCTTGTA |       |       |       |       |       |       |       |
|                                                      | (1)     | -----                                                                          |       |       |       |       |       |       |       |
| Candidatus Carsonella 135557 - 167442nt              | (1)     | -----                                                                          |       |       |       |       |       |       |       |
| SARS-CoV-2 Reference Genome NC_045512.2              | (1)     | -----                                                                          |       |       |       |       |       |       |       |
|                                                      |         | Section 896                                                                    |       |       |       |       |       |       |       |
| Candidatus Carsonella ruddii strain BT chromosome... | (68916) | 68916                                                                          | 68926 | 68937 | 68948 | 68959 | 68970 | 68981 | 68992 |
|                                                      | (68916) | ATGATTTAAATCCATCAAGTTTTATTTCTGAAAAATGAACAAATAAATCATCACCTCCATCATCAGGAGATATAAAA  |       |       |       |       |       |       |       |
|                                                      | (1)     | -----                                                                          |       |       |       |       |       |       |       |
| Candidatus Carsonella 135557 - 167442nt              | (1)     | -----                                                                          |       |       |       |       |       |       |       |
| SARS-CoV-2 Reference Genome NC_045512.2              | (1)     | -----                                                                          |       |       |       |       |       |       |       |
|                                                      |         | Section 897                                                                    |       |       |       |       |       |       |       |
| Candidatus Carsonella ruddii strain BT chromosome... | (68993) | 68993                                                                          | 69003 | 69014 | 69025 | 69036 | 69047 | 69058 | 69069 |
|                                                      | (68993) | CCGAATCCTTTTGTATCATTAACCATTTTACTGTTCCAGTTGCCATATTTTATAGAAAAACGAAAAAATTTTTTT    |       |       |       |       |       |       |       |
|                                                      | (1)     | -----                                                                          |       |       |       |       |       |       |       |
| Candidatus Carsonella 135557 - 167442nt              | (1)     | -----                                                                          |       |       |       |       |       |       |       |
| SARS-CoV-2 Reference Genome NC_045512.2              | (1)     | -----                                                                          |       |       |       |       |       |       |       |
|                                                      |         | Section 898                                                                    |       |       |       |       |       |       |       |
| Candidatus Carsonella ruddii strain BT chromosome... | (69070) | 69070                                                                          | 69080 | 69091 | 69102 | 69113 | 69124 | 69135 | 69146 |
|                                                      | (69070) | TAATTTTTTGTAAAAATACAGAAAAACAATGTTATATATATCCTATAGTTTTAAACAATATTCTATATTTTTTAA    |       |       |       |       |       |       |       |
|                                                      | (1)     | -----                                                                          |       |       |       |       |       |       |       |
| Candidatus Carsonella 135557 - 167442nt              | (1)     | -----                                                                          |       |       |       |       |       |       |       |
| SARS-CoV-2 Reference Genome NC_045512.2              | (1)     | -----                                                                          |       |       |       |       |       |       |       |
|                                                      |         | Section 899                                                                    |       |       |       |       |       |       |       |
| Candidatus Carsonella ruddii strain BT chromosome... | (69147) | 69147                                                                          | 69157 | 69168 | 69179 | 69190 | 69201 | 69212 | 69223 |
|                                                      | (69147) | TTTATAAGAATGTTTTTAAAAACAACATAATTTTTTATTTATAAAATAATTTAAAAATATATATTTATTTTTTTTGT  |       |       |       |       |       |       |       |
|                                                      | (1)     | -----                                                                          |       |       |       |       |       |       |       |
| Candidatus Carsonella 135557 - 167442nt              | (1)     | -----                                                                          |       |       |       |       |       |       |       |
| SARS-CoV-2 Reference Genome NC_045512.2              | (1)     | -----                                                                          |       |       |       |       |       |       |       |
|                                                      |         | Section 900                                                                    |       |       |       |       |       |       |       |
| Candidatus Carsonella ruddii strain BT chromosome... | (69224) | 69224                                                                          | 69234 | 69245 | 69256 | 69267 | 69278 | 69289 | 69300 |
|                                                      | (69224) | TTTTCAATTTAAAAATATATTTTGAATTAAAAACAAAAAATAATTTTACCTTTTTTAAAAATAAATTTTAAATTTTAA |       |       |       |       |       |       |       |
|                                                      | (1)     | -----                                                                          |       |       |       |       |       |       |       |
| Candidatus Carsonella 135557 - 167442nt              | (1)     | -----                                                                          |       |       |       |       |       |       |       |
| SARS-CoV-2 Reference Genome NC_045512.2              | (1)     | -----                                                                          |       |       |       |       |       |       |       |

|                                                      |         |                                                                                 |       |       |       |       |       |       |       |
|------------------------------------------------------|---------|---------------------------------------------------------------------------------|-------|-------|-------|-------|-------|-------|-------|
|                                                      |         | Section 901                                                                     |       |       |       |       |       |       |       |
| Candidatus Carsonella ruddii strain BT chromosome... | (69301) | 69301                                                                           | 69311 | 69322 | 69333 | 69344 | 69355 | 69366 | 69377 |
|                                                      | (69301) | AATAAATTATTTTTTCCATTGTTTTAAAAAATAAATAATTTCTGTTTAAAGAAATTATTATTTTTTTTTCTTTTTT    |       |       |       |       |       |       |       |
|                                                      | (1)     | -----                                                                           |       |       |       |       |       |       |       |
| Candidatus Carsonella 135557 - 167442nt              | (1)     | -----                                                                           |       |       |       |       |       |       |       |
| SARS-CoV-2 Reference Genome NC_045512.2              | (1)     | -----                                                                           |       |       |       |       |       |       |       |
|                                                      |         | Section 902                                                                     |       |       |       |       |       |       |       |
| Candidatus Carsonella ruddii strain BT chromosome... | (69378) | 69378                                                                           | 69388 | 69399 | 69410 | 69421 | 69432 | 69443 | 69454 |
|                                                      | (69378) | TAAAAAGAAAAAAAAATATTTTTTTTTTTTTTATATTTATTAATATAATATTTTTTTTTTTAAAAATAAAAAA       |       |       |       |       |       |       |       |
|                                                      | (1)     | -----                                                                           |       |       |       |       |       |       |       |
| Candidatus Carsonella 135557 - 167442nt              | (1)     | -----                                                                           |       |       |       |       |       |       |       |
| SARS-CoV-2 Reference Genome NC_045512.2              | (1)     | -----                                                                           |       |       |       |       |       |       |       |
|                                                      |         | Section 903                                                                     |       |       |       |       |       |       |       |
| Candidatus Carsonella ruddii strain BT chromosome... | (69455) | 69455                                                                           | 69465 | 69476 | 69487 | 69498 | 69509 | 69520 | 69531 |
|                                                      | (69455) | AATTCAATTCTTCTTGAACATAAAATTGATTTTCTTTTTTGTATAAAATAAAAAATATTATTATTTATAAAAGAAATA  |       |       |       |       |       |       |       |
|                                                      | (1)     | -----                                                                           |       |       |       |       |       |       |       |
| Candidatus Carsonella 135557 - 167442nt              | (1)     | -----                                                                           |       |       |       |       |       |       |       |
| SARS-CoV-2 Reference Genome NC_045512.2              | (1)     | -----                                                                           |       |       |       |       |       |       |       |
|                                                      |         | Section 904                                                                     |       |       |       |       |       |       |       |
| Candidatus Carsonella ruddii strain BT chromosome... | (69532) | 69532                                                                           | 69542 | 69553 | 69564 | 69575 | 69586 | 69597 | 69608 |
|                                                      | (69532) | TTTTTTTTTTTTTAAAAAAATCATTAAAAAATTTATTTTAAATAAAAAATTAACGTAAATTAATTTAAAAA         |       |       |       |       |       |       |       |
|                                                      | (1)     | -----                                                                           |       |       |       |       |       |       |       |
| Candidatus Carsonella 135557 - 167442nt              | (1)     | -----                                                                           |       |       |       |       |       |       |       |
| SARS-CoV-2 Reference Genome NC_045512.2              | (1)     | -----                                                                           |       |       |       |       |       |       |       |
|                                                      |         | Section 905                                                                     |       |       |       |       |       |       |       |
| Candidatus Carsonella ruddii strain BT chromosome... | (69609) | 69609                                                                           | 69619 | 69630 | 69641 | 69652 | 69663 | 69674 | 69685 |
|                                                      | (69609) | TAATTTTAAATATTTTTTCCAACTTAAATAAAAAATTTATTTTAAAAATATAATTATATTGTTTTTTTTTA         |       |       |       |       |       |       |       |
|                                                      | (1)     | -----                                                                           |       |       |       |       |       |       |       |
| Candidatus Carsonella 135557 - 167442nt              | (1)     | -----                                                                           |       |       |       |       |       |       |       |
| SARS-CoV-2 Reference Genome NC_045512.2              | (1)     | -----                                                                           |       |       |       |       |       |       |       |
|                                                      |         | Section 906                                                                     |       |       |       |       |       |       |       |
| Candidatus Carsonella ruddii strain BT chromosome... | (69686) | 69686                                                                           | 69696 | 69707 | 69718 | 69729 | 69740 | 69751 | 69762 |
|                                                      | (69686) | ATTTAATATTATTTTTATTTTTTAAATTTGTTTTTACAATAAAAAATTATAATATTCATTAAATATTAAATGTTTTTCG |       |       |       |       |       |       |       |
|                                                      | (1)     | -----                                                                           |       |       |       |       |       |       |       |
| Candidatus Carsonella 135557 - 167442nt              | (1)     | -----                                                                           |       |       |       |       |       |       |       |
| SARS-CoV-2 Reference Genome NC_045512.2              | (1)     | -----                                                                           |       |       |       |       |       |       |       |

|                                                      |         |                                                                                |       |       |       |       |       |       |       |
|------------------------------------------------------|---------|--------------------------------------------------------------------------------|-------|-------|-------|-------|-------|-------|-------|
|                                                      |         | Section 907                                                                    |       |       |       |       |       |       |       |
| Candidatus Carsonella ruddii strain BT chromosome... | (69763) | 69763                                                                          | 69773 | 69784 | 69795 | 69806 | 69817 | 69828 | 69839 |
|                                                      | (69763) | TATTTAATATTTAAAATTTTTCTATAAAATATTCAACATTTGTAAAAAAATATTTTTTTTAAAAACAACATTTTT    |       |       |       |       |       |       |       |
|                                                      | (1)     | -----                                                                          |       |       |       |       |       |       |       |
| Candidatus Carsonella 135557 - 167442nt              | (1)     | -----                                                                          |       |       |       |       |       |       |       |
| SARS-CoV-2 Reference Genome NC_045512.2              | (1)     | -----                                                                          |       |       |       |       |       |       |       |
|                                                      |         | Section 908                                                                    |       |       |       |       |       |       |       |
| Candidatus Carsonella ruddii strain BT chromosome... | (69840) | 69840                                                                          | 69850 | 69861 | 69872 | 69883 | 69894 | 69905 | 69916 |
|                                                      | (69840) | AATTTTTAAAATATTTTTATTTTTATTTTTATTTTATTTTAAAAATATTAATAAAAAATTAATTTTTTTAATTA     |       |       |       |       |       |       |       |
|                                                      | (1)     | -----                                                                          |       |       |       |       |       |       |       |
| Candidatus Carsonella 135557 - 167442nt              | (1)     | -----                                                                          |       |       |       |       |       |       |       |
| SARS-CoV-2 Reference Genome NC_045512.2              | (1)     | -----                                                                          |       |       |       |       |       |       |       |
|                                                      |         | Section 909                                                                    |       |       |       |       |       |       |       |
| Candidatus Carsonella ruddii strain BT chromosome... | (69917) | 69917                                                                          | 69927 | 69938 | 69949 | 69960 | 69971 | 69982 | 69993 |
|                                                      | (69917) | AAATTTGAAAATTAAAATATTTTTCTAAAAACAATTTTCATTTAACATAAAAAAATATGAAAAAATAATTGTTGC    |       |       |       |       |       |       |       |
|                                                      | (1)     | -----                                                                          |       |       |       |       |       |       |       |
| Candidatus Carsonella 135557 - 167442nt              | (1)     | -----                                                                          |       |       |       |       |       |       |       |
| SARS-CoV-2 Reference Genome NC_045512.2              | (1)     | -----                                                                          |       |       |       |       |       |       |       |
|                                                      |         | Section 910                                                                    |       |       |       |       |       |       |       |
| Candidatus Carsonella ruddii strain BT chromosome... | (69994) | 69994                                                                          | 70004 | 70015 | 70026 | 70037 | 70048 | 70059 | 70070 |
|                                                      | (69994) | TCAAGCAACTTCAGAAGGTTATGCATCAGTTTGCATAGTAAGAATTTTCAGGTGAACATGTAAACAATTTATTGAAC  |       |       |       |       |       |       |       |
|                                                      | (1)     | -----                                                                          |       |       |       |       |       |       |       |
| Candidatus Carsonella 135557 - 167442nt              | (1)     | -----                                                                          |       |       |       |       |       |       |       |
| SARS-CoV-2 Reference Genome NC_045512.2              | (1)     | -----                                                                          |       |       |       |       |       |       |       |
|                                                      |         | Section 911                                                                    |       |       |       |       |       |       |       |
| Candidatus Carsonella ruddii strain BT chromosome... | (70071) | 70071                                                                          | 70081 | 70092 | 70103 | 70114 | 70125 | 70136 | 70147 |
|                                                      | (70071) | CTTTAATAAAAGTAAATTA AAAACTCAAAAATTAACATATACAAGATTATATGATTTAAATAATAATTTTATAGAT  |       |       |       |       |       |       |       |
|                                                      | (1)     | -----                                                                          |       |       |       |       |       |       |       |
| Candidatus Carsonella 135557 - 167442nt              | (1)     | -----                                                                          |       |       |       |       |       |       |       |
| SARS-CoV-2 Reference Genome NC_045512.2              | (1)     | -----                                                                          |       |       |       |       |       |       |       |
|                                                      |         | Section 912                                                                    |       |       |       |       |       |       |       |
| Candidatus Carsonella ruddii strain BT chromosome... | (70148) | 70148                                                                          | 70158 | 70169 | 70180 | 70191 | 70202 | 70213 | 70224 |
|                                                      | (70148) | TTTATATTAATAGTTTATTTTAAAGGACCTAAATCTTTAACAGGAGATGATATTATAGAATTTTCATTTACATGGAAG |       |       |       |       |       |       |       |
|                                                      | (1)     | -----                                                                          |       |       |       |       |       |       |       |
| Candidatus Carsonella 135557 - 167442nt              | (1)     | -----                                                                          |       |       |       |       |       |       |       |
| SARS-CoV-2 Reference Genome NC_045512.2              | (1)     | -----                                                                          |       |       |       |       |       |       |       |



|                                                      |         |                                                                                 |       |       |       |       |       |       |       |
|------------------------------------------------------|---------|---------------------------------------------------------------------------------|-------|-------|-------|-------|-------|-------|-------|
|                                                      |         | Section 913                                                                     |       |       |       |       |       |       |       |
| Candidatus Carsonella ruddii strain BT chromosome... | (70225) | 70225                                                                           | 70235 | 70246 | 70257 | 70268 | 70279 | 70290 | 70301 |
|                                                      | (70225) | TATTTTATTATCTAAAAAATTAATAAAAAATATTATTGTTAATGGGTGCTAAAGTAGCAAAACCAGGAGAATTTTATAG |       |       |       |       |       |       |       |
|                                                      | (1)     | -----                                                                           |       |       |       |       |       |       |       |
| Candidatus Carsonella 135557 - 167442nt              | (1)     | -----                                                                           |       |       |       |       |       |       |       |
| SARS-CoV-2 Reference Genome NC_045512.2              | (1)     | -----                                                                           |       |       |       |       |       |       |       |
|                                                      |         | Section 914                                                                     |       |       |       |       |       |       |       |
| Candidatus Carsonella ruddii strain BT chromosome... | (70302) | 70302                                                                           | 70312 | 70323 | 70334 | 70345 | 70356 | 70367 | 70378 |
|                                                      | (70302) | AAAAAAGATATTTAAATGGTAAAATTCATTAATAGAATGTGAAATTATTAACAACAAAATTTCTTTTATAATGAA     |       |       |       |       |       |       |       |
|                                                      | (1)     | -----                                                                           |       |       |       |       |       |       |       |
| Candidatus Carsonella 135557 - 167442nt              | (1)     | -----                                                                           |       |       |       |       |       |       |       |
| SARS-CoV-2 Reference Genome NC_045512.2              | (1)     | -----                                                                           |       |       |       |       |       |       |       |
|                                                      |         | Section 915                                                                     |       |       |       |       |       |       |       |
| Candidatus Carsonella ruddii strain BT chromosome... | (70379) | 70379                                                                           | 70389 | 70400 | 70411 | 70422 | 70433 | 70444 | 70455 |
|                                                      | (70379) | AATATGTTTAAATTTAAATTTAAATTCACAAAAAATATTTTTTTATCTATAATTAAAAATTCAAAATTTAGATTAA    |       |       |       |       |       |       |       |
|                                                      | (1)     | -----                                                                           |       |       |       |       |       |       |       |
| Candidatus Carsonella 135557 - 167442nt              | (1)     | -----                                                                           |       |       |       |       |       |       |       |
| SARS-CoV-2 Reference Genome NC_045512.2              | (1)     | -----                                                                           |       |       |       |       |       |       |       |
|                                                      |         | Section 916                                                                     |       |       |       |       |       |       |       |
| Candidatus Carsonella ruddii strain BT chromosome... | (70456) | 70456                                                                           | 70466 | 70477 | 70488 | 70499 | 70510 | 70521 | 70532 |
|                                                      | (70456) | TATGTTAATAATTTGTTTAGAAAAATCTTTTATAAATGAAAAAGATACATTTTTAAATGATTTTATTTTTTAAAAA    |       |       |       |       |       |       |       |
|                                                      | (1)     | -----                                                                           |       |       |       |       |       |       |       |
| Candidatus Carsonella 135557 - 167442nt              | (1)     | -----                                                                           |       |       |       |       |       |       |       |
| SARS-CoV-2 Reference Genome NC_045512.2              | (1)     | -----                                                                           |       |       |       |       |       |       |       |
|                                                      |         | Section 917                                                                     |       |       |       |       |       |       |       |
| Candidatus Carsonella ruddii strain BT chromosome... | (70533) | 70533                                                                           | 70543 | 70554 | 70565 | 70576 | 70587 | 70598 | 70609 |
|                                                      | (70533) | AATTTTTAAAAAATTTAAAAAATTAATAAATATATTATTAAATAAAATAAAATAAAATAAAATATTTAAAAACAAAT   |       |       |       |       |       |       |       |
|                                                      | (1)     | -----                                                                           |       |       |       |       |       |       |       |
| Candidatus Carsonella 135557 - 167442nt              | (1)     | -----                                                                           |       |       |       |       |       |       |       |
| SARS-CoV-2 Reference Genome NC_045512.2              | (1)     | -----                                                                           |       |       |       |       |       |       |       |
|                                                      |         | Section 918                                                                     |       |       |       |       |       |       |       |
| Candidatus Carsonella ruddii strain BT chromosome... | (70610) | 70610                                                                           | 70620 | 70631 | 70642 | 70653 | 70664 | 70675 | 70686 |
|                                                      | (70610) | TTTGAAATATTAATAATGGGAAAGAGAAATGTTGGAAAAATCAACATTATTTAATAAAATGTGTTTAAATTATTATTC  |       |       |       |       |       |       |       |
|                                                      | (1)     | -----                                                                           |       |       |       |       |       |       |       |
| Candidatus Carsonella 135557 - 167442nt              | (1)     | -----                                                                           |       |       |       |       |       |       |       |
| SARS-CoV-2 Reference Genome NC_045512.2              | (1)     | -----                                                                           |       |       |       |       |       |       |       |

## SARS-CoV-2 &amp; Bakterien.apr

|                                                      |         |                         |                        |                        |               |       |       |       |       |
|------------------------------------------------------|---------|-------------------------|------------------------|------------------------|---------------|-------|-------|-------|-------|
| Section 919                                          |         |                         |                        |                        |               |       |       |       |       |
| Candidatus Carsonella ruddii strain BT chromosome... | (70687) | 70687                   | 70697                  | 70708                  | 70719         | 70730 | 70741 | 70752 | 70763 |
| Candidatus Carsonella 135557 - 167442nt              | (70687) | TATTGTTACAAATATACCAGGA  | ACTACAAAAAACATTATTTCAA | AAAGAAATTTTTTTTTTCTTCT | AAAAATATTAATT |       |       |       |       |
| SARS-CoV-2 Reference Genome NC_045512.2              | (1)     | -----                   | -----                  | -----                  | -----         | ----- | ----- | ----- | ----- |
| Section 920                                          |         |                         |                        |                        |               |       |       |       |       |
| Candidatus Carsonella ruddii strain BT chromosome... | (70764) | 70764                   | 70774                  | 70785                  | 70796         | 70807 | 70818 | 70829 | 70840 |
| Candidatus Carsonella 135557 - 167442nt              | (70764) | TAAATGATACAGCAGGATTAAA  | ATTAAAACTAAAAATTTTATTG | AAAAATAGGAATTTTAAGAAAT | ATTAATAAA     |       |       |       |       |
| SARS-CoV-2 Reference Genome NC_045512.2              | (1)     | -----                   | -----                  | -----                  | -----         | ----- | ----- | ----- | ----- |
| Section 921                                          |         |                         |                        |                        |               |       |       |       |       |
| Candidatus Carsonella ruddii strain BT chromosome... | (70841) | 70841                   | 70851                  | 70862                  | 70873         | 70884 | 70895 | 70906 | 70917 |
| Candidatus Carsonella 135557 - 167442nt              | (70841) | ATATTAAAAAGCGATTTAATTAT | TTTATATAGTAGATAAAATTTA | ATATTTAAAAATATTTTTTACA | ATATGCCTTTAA  |       |       |       |       |
| SARS-CoV-2 Reference Genome NC_045512.2              | (1)     | -----                   | -----                  | -----                  | -----         | ----- | ----- | ----- | ----- |
| Section 922                                          |         |                         |                        |                        |               |       |       |       |       |
| Candidatus Carsonella ruddii strain BT chromosome... | (70918) | 70918                   | 70928                  | 70939                  | 70950         | 70961 | 70972 | 70983 | 70994 |
| Candidatus Carsonella 135557 - 167442nt              | (70918) | TTTTTTAAAAAAATAAAAAATA  | ATCTTTTAATTATTGTTATTA  | ATAAATGTGATTTATTTGGA   | ATACCAGAAGGTT |       |       |       |       |
| SARS-CoV-2 Reference Genome NC_045512.2              | (1)     | -----                   | -----                  | -----                  | -----         | ----- | ----- | ----- | ----- |
| Section 923                                          |         |                         |                        |                        |               |       |       |       |       |
| Candidatus Carsonella ruddii strain BT chromosome... | (70995) | 70995                   | 71005                  | 71016                  | 71027         | 71038 | 71049 | 71060 | 71071 |
| Candidatus Carsonella 135557 - 167442nt              | (70995) | TTTATAAAATGAAATCTATTATT | GTTATTTTTTTTAAATGCTAA  | AAATAGTGTTATTATTAATA   | ATTTAAATGTTTT |       |       |       |       |
| SARS-CoV-2 Reference Genome NC_045512.2              | (1)     | -----                   | -----                  | -----                  | -----         | ----- | ----- | ----- | ----- |
| Section 924                                          |         |                         |                        |                        |               |       |       |       |       |
| Candidatus Carsonella ruddii strain BT chromosome... | (71072) | 71072                   | 71082                  | 71093                  | 71104         | 71115 | 71126 | 71137 | 71148 |
| Candidatus Carsonella 135557 - 167442nt              | (71072) | ATAAGTAAATAATAACAAATA   | AAAAAATTTTAGATAATAAT   | TACATTATACTAATATATATA  | CATTATATAATAA |       |       |       |       |
| SARS-CoV-2 Reference Genome NC_045512.2              | (1)     | -----                   | -----                  | -----                  | -----         | ----- | ----- | ----- | ----- |

|                                                      |         |                                                                                |       |       |       |       |       |       |       |
|------------------------------------------------------|---------|--------------------------------------------------------------------------------|-------|-------|-------|-------|-------|-------|-------|
| Section 925                                          |         |                                                                                |       |       |       |       |       |       |       |
| Candidatus Carsonella ruddii strain BT chromosome... | (71149) | 71149                                                                          | 71159 | 71170 | 71181 | 71192 | 71203 | 71214 | 71225 |
| Candidatus Carsonella 135557 - 167442nt              | (71149) | ATGTAGTAAATTTTATGAAAATTTTTTTTGTAGTTATGATTTAATATTAGAAAACATAATTAATTTTCAAAAAAAAAA |       |       |       |       |       |       |       |
| SARS-CoV-2 Reference Genome NC_045512.2              | (1)     | -----                                                                          |       |       |       |       |       |       |       |
|                                                      | (1)     | -----                                                                          |       |       |       |       |       |       |       |
| Section 926                                          |         |                                                                                |       |       |       |       |       |       |       |
| Candidatus Carsonella ruddii strain BT chromosome... | (71226) | 71226                                                                          | 71236 | 71247 | 71258 | 71269 | 71280 | 71291 | 71302 |
| Candidatus Carsonella 135557 - 167442nt              | (71226) | TTTTAAAAATATCAGGAGAATACACAAATAACGTAATTTTAAATTCTATTTTTAGAAATTTTGTATGGGTAAATAA   |       |       |       |       |       |       |       |
| SARS-CoV-2 Reference Genome NC_045512.2              | (1)     | -----                                                                          |       |       |       |       |       |       |       |
|                                                      | (1)     | -----                                                                          |       |       |       |       |       |       |       |
| Section 927                                          |         |                                                                                |       |       |       |       |       |       |       |
| Candidatus Carsonella ruddii strain BT chromosome... | (71303) | 71303                                                                          | 71313 | 71324 | 71335 | 71346 | 71357 | 71368 | 71379 |
| Candidatus Carsonella 135557 - 167442nt              | (71303) | TGATATTTAATATAATTATTATAGGTGGAGGACATTCAGGAATAGAAGCATGTTTGTCTTCTTCAAAAATTTGTAAT  |       |       |       |       |       |       |       |
| SARS-CoV-2 Reference Genome NC_045512.2              | (1)     | -----                                                                          |       |       |       |       |       |       |       |
|                                                      | (1)     | -----                                                                          |       |       |       |       |       |       |       |
| Section 928                                          |         |                                                                                |       |       |       |       |       |       |       |
| Candidatus Carsonella ruddii strain BT chromosome... | (71380) | 71380                                                                          | 71390 | 71401 | 71412 | 71423 | 71434 | 71445 | 71456 |
| Candidatus Carsonella 135557 - 167442nt              | (71380) | AAAACAAAATTAATTTTCATCAAATTTAGAAAATTTAGGAATGTTATCATGTAATCCTTCAATAGGTGGTGTGGAAA  |       |       |       |       |       |       |       |
| SARS-CoV-2 Reference Genome NC_045512.2              | (1)     | -----                                                                          |       |       |       |       |       |       |       |
|                                                      | (1)     | -----                                                                          |       |       |       |       |       |       |       |
| Section 929                                          |         |                                                                                |       |       |       |       |       |       |       |
| Candidatus Carsonella ruddii strain BT chromosome... | (71457) | 71457                                                                          | 71467 | 71478 | 71489 | 71500 | 71511 | 71522 | 71533 |
| Candidatus Carsonella 135557 - 167442nt              | (71457) | AAGTCATTTAATAAAAGAATTAGAAATTTAGGTGGAATAATATCTGAAGCTTCTGATTATTCTAGAATTCATTCTA   |       |       |       |       |       |       |       |
| SARS-CoV-2 Reference Genome NC_045512.2              | (1)     | -----                                                                          |       |       |       |       |       |       |       |
|                                                      | (1)     | -----                                                                          |       |       |       |       |       |       |       |
| Section 930                                          |         |                                                                                |       |       |       |       |       |       |       |
| Candidatus Carsonella ruddii strain BT chromosome... | (71534) | 71534                                                                          | 71544 | 71555 | 71566 | 71577 | 71588 | 71599 | 71610 |
| Candidatus Carsonella 135557 - 167442nt              | (71534) | AAATTTTAAATTTTAAAAAAGGGGAATCTATTCATTCTTTAAGGTATCAAATAGATAGAATTTTATATAAAAATTAT  |       |       |       |       |       |       |       |
| SARS-CoV-2 Reference Genome NC_045512.2              | (1)     | -----                                                                          |       |       |       |       |       |       |       |
|                                                      | (1)     | -----                                                                          |       |       |       |       |       |       |       |

## SARS-CoV-2 &amp; Bakterien.apr

|                                                      |         |                                                                               |       |       |       |       |       |       |       |
|------------------------------------------------------|---------|-------------------------------------------------------------------------------|-------|-------|-------|-------|-------|-------|-------|
| Section 931                                          |         |                                                                               |       |       |       |       |       |       |       |
| Candidatus Carsonella ruddii strain BT chromosome... | (71611) | 71611                                                                         | 71621 | 71632 | 71643 | 71654 | 71665 | 71676 | 71687 |
| Candidatus Carsonella 135557 - 167442nt              | (71611) | ATTTTAAAAATTTTATTTATTAAAAAAATATTTTAATTGAACAAAATGATATTAAAAATATTATAAGATTTAAAAA  |       |       |       |       |       |       |       |
| SARS-CoV-2 Reference Genome NC_045512.2              | (1)     | -----                                                                         |       |       |       |       |       |       |       |
|                                                      | (1)     | -----                                                                         |       |       |       |       |       |       |       |
| Section 932                                          |         |                                                                               |       |       |       |       |       |       |       |
| Candidatus Carsonella ruddii strain BT chromosome... | (71688) | 71688                                                                         | 71698 | 71709 | 71720 | 71731 | 71742 | 71753 | 71764 |
| Candidatus Carsonella 135557 - 167442nt              | (71688) | AAAAATATTATTAATAGATAAAATTTAATTGTATACATATTACAAAAATATAATACTATGTGCTGGAACCTTTATTA |       |       |       |       |       |       |       |
| SARS-CoV-2 Reference Genome NC_045512.2              | (1)     | -----                                                                         |       |       |       |       |       |       |       |
|                                                      | (1)     | -----                                                                         |       |       |       |       |       |       |       |
| Section 933                                          |         |                                                                               |       |       |       |       |       |       |       |
| Candidatus Carsonella ruddii strain BT chromosome... | (71765) | 71765                                                                         | 71775 | 71786 | 71797 | 71808 | 71819 | 71830 | 71841 |
| Candidatus Carsonella 135557 - 167442nt              | (71765) | ATTCAAAAATTTGTATAGGTAAAAATATTTTAAATATGGAAGATATAATGAAAAGACATTTTATTTATCTAAATCA  |       |       |       |       |       |       |       |
| SARS-CoV-2 Reference Genome NC_045512.2              | (1)     | -----                                                                         |       |       |       |       |       |       |       |
|                                                      | (1)     | -----                                                                         |       |       |       |       |       |       |       |
| Section 934                                          |         |                                                                               |       |       |       |       |       |       |       |
| Candidatus Carsonella ruddii strain BT chromosome... | (71842) | 71842                                                                         | 71852 | 71863 | 71874 | 71885 | 71896 | 71907 | 71918 |
| Candidatus Carsonella 135557 - 167442nt              | (71842) | TTAAAAAAATTAATTTATTTATAAATAAATTAAAAACAGGAACACCACCTAGAATAGATATAAATCATATTAATTA  |       |       |       |       |       |       |       |
| SARS-CoV-2 Reference Genome NC_045512.2              | (1)     | -----                                                                         |       |       |       |       |       |       |       |
|                                                      | (1)     | -----                                                                         |       |       |       |       |       |       |       |
| Section 935                                          |         |                                                                               |       |       |       |       |       |       |       |
| Candidatus Carsonella ruddii strain BT chromosome... | (71919) | 71919                                                                         | 71929 | 71940 | 71951 | 71962 | 71973 | 71984 | 71995 |
| Candidatus Carsonella 135557 - 167442nt              | (71919) | TAAAAAATTAATTATACAATATAGTGATTATTCTTATTATTTTGGTAAAAATTTTAATTTTAATAATAATATTAAAT |       |       |       |       |       |       |       |
| SARS-CoV-2 Reference Genome NC_045512.2              | (1)     | -----                                                                         |       |       |       |       |       |       |       |
|                                                      | (1)     | -----                                                                         |       |       |       |       |       |       |       |
| Section 936                                          |         |                                                                               |       |       |       |       |       |       |       |
| Candidatus Carsonella ruddii strain BT chromosome... | (71996) | 71996                                                                         | 72006 | 72017 | 72028 | 72039 | 72050 | 72061 | 72072 |
| Candidatus Carsonella 135557 - 167442nt              | (71996) | GTTTTGTTACTAATACAAATTTAAAATTACATAATTTTATTAAAAAAAATTAATCAACATCATTATATATAGGA    |       |       |       |       |       |       |       |
| SARS-CoV-2 Reference Genome NC_045512.2              | (1)     | -----                                                                         |       |       |       |       |       |       |       |
|                                                      | (1)     | -----                                                                         |       |       |       |       |       |       |       |

|                                                      |         |                                                                                 |       |       |       |       |       |       |       |
|------------------------------------------------------|---------|---------------------------------------------------------------------------------|-------|-------|-------|-------|-------|-------|-------|
| Section 937                                          |         |                                                                                 |       |       |       |       |       |       |       |
| Candidatus Carsonella ruddii strain BT chromosome... | (72073) | 72073                                                                           | 72083 | 72094 | 72105 | 72116 | 72127 | 72138 | 72149 |
| Candidatus Carsonella 135557 - 167442nt              | (72073) | AATATATCTAGTTTAGGACCAAGATATTGTCCTTCTATAGAAGATAAAATATATAAAATTTTTATCAAAAAATAATCA  |       |       |       |       |       |       |       |
| SARS-CoV-2 Reference Genome NC_045512.2              | (1)     | -----                                                                           |       |       |       |       |       |       |       |
|                                                      | (1)     | -----                                                                           |       |       |       |       |       |       |       |
| Section 938                                          |         |                                                                                 |       |       |       |       |       |       |       |
| Candidatus Carsonella ruddii strain BT chromosome... | (72150) | 72150                                                                           | 72160 | 72171 | 72182 | 72193 | 72204 | 72215 | 72226 |
| Candidatus Carsonella 135557 - 167442nt              | (72150) | TCAAATTTTTTTAGAACCTGAAGGATTTTATAGTAAAGAAATATATTTAAATGGTTTATCTACATCTTTATCTTTGA   |       |       |       |       |       |       |       |
| SARS-CoV-2 Reference Genome NC_045512.2              | (1)     | -----                                                                           |       |       |       |       |       |       |       |
|                                                      | (1)     | -----                                                                           |       |       |       |       |       |       |       |
| Section 939                                          |         |                                                                                 |       |       |       |       |       |       |       |
| Candidatus Carsonella ruddii strain BT chromosome... | (72227) | 72227                                                                           | 72237 | 72248 | 72259 | 72270 | 72281 | 72292 | 72303 |
| Candidatus Carsonella 135557 - 167442nt              | (72227) | ATAATCAAAAAAAAAATAATAAAAAAAAAATAAAGGATTAGAAAAATCTTTAATTATTAGATTTGCATATAATATTGAA |       |       |       |       |       |       |       |
| SARS-CoV-2 Reference Genome NC_045512.2              | (1)     | -----                                                                           |       |       |       |       |       |       |       |
|                                                      | (1)     | -----                                                                           |       |       |       |       |       |       |       |
| Section 940                                          |         |                                                                                 |       |       |       |       |       |       |       |
| Candidatus Carsonella ruddii strain BT chromosome... | (72304) | 72304                                                                           | 72314 | 72325 | 72336 | 72347 | 72358 | 72369 | 72380 |
| Candidatus Carsonella 135557 - 167442nt              | (72304) | TATGATTATTTTGATCCAAGATGTTTAAATATTACTTTAAATATTAAATTTGCAAATAATATTTTTTATGTGGACA    |       |       |       |       |       |       |       |
| SARS-CoV-2 Reference Genome NC_045512.2              | (1)     | -----                                                                           |       |       |       |       |       |       |       |
|                                                      | (1)     | -----                                                                           |       |       |       |       |       |       |       |
| Section 941                                          |         |                                                                                 |       |       |       |       |       |       |       |
| Candidatus Carsonella ruddii strain BT chromosome... | (72381) | 72381                                                                           | 72391 | 72402 | 72413 | 72424 | 72435 | 72446 | 72457 |
| Candidatus Carsonella 135557 - 167442nt              | (72381) | AATAAATGGATCAACAGGTTATGAAGAAGCAGCAGTACAAGGTTTTGTAGCAGGTGTAAATGCTGCTAGAAAAAGTA   |       |       |       |       |       |       |       |
| SARS-CoV-2 Reference Genome NC_045512.2              | (1)     | -----                                                                           |       |       |       |       |       |       |       |
|                                                      | (1)     | -----                                                                           |       |       |       |       |       |       |       |
| Section 942                                          |         |                                                                                 |       |       |       |       |       |       |       |
| Candidatus Carsonella ruddii strain BT chromosome... | (72458) | 72458                                                                           | 72468 | 72479 | 72490 | 72501 | 72512 | 72523 | 72534 |
| Candidatus Carsonella 135557 - 167442nt              | (72458) | TTAATTTATTATTATGGAAACCAAAAAATGGAATTCATATATTGGAGTTTTAATAAATGATCTTATTAATATTGGT    |       |       |       |       |       |       |       |
| SARS-CoV-2 Reference Genome NC_045512.2              | (1)     | -----                                                                           |       |       |       |       |       |       |       |
|                                                      | (1)     | -----                                                                           |       |       |       |       |       |       |       |

|                                                      |         |                                                                                 |       |       |       |       |       |       |       |
|------------------------------------------------------|---------|---------------------------------------------------------------------------------|-------|-------|-------|-------|-------|-------|-------|
|                                                      |         | Section 943                                                                     |       |       |       |       |       |       |       |
| Candidatus Carsonella ruddii strain BT chromosome... | (72535) | 72535                                                                           | 72545 | 72556 | 72567 | 72578 | 72589 | 72600 | 72611 |
|                                                      | (72535) | ATTAGTGAACCATATAGAATTTTTACTTCTAAATCAAATTTAGATTATTTTAAAGAATGGATAATTCTTTATATAG    |       |       |       |       |       |       |       |
|                                                      | (1)     | -----                                                                           |       |       |       |       |       |       |       |
| Candidatus Carsonella 135557 - 167442nt              | (1)     | -----                                                                           |       |       |       |       |       |       |       |
| SARS-CoV-2 Reference Genome NC_045512.2              | (1)     | -----                                                                           |       |       |       |       |       |       |       |
|                                                      |         | Section 944                                                                     |       |       |       |       |       |       |       |
| Candidatus Carsonella ruddii strain BT chromosome... | (72612) | 72612                                                                           | 72622 | 72633 | 72644 | 72655 | 72666 | 72677 | 72688 |
|                                                      | (72612) | ATTAACAAATTTAGGTTTTTTAATTGGAACATTACTAAATTTAAATTTAAATTTTATAATAATTATATATATAATA    |       |       |       |       |       |       |       |
|                                                      | (1)     | -----                                                                           |       |       |       |       |       |       |       |
| Candidatus Carsonella 135557 - 167442nt              | (1)     | -----                                                                           |       |       |       |       |       |       |       |
| SARS-CoV-2 Reference Genome NC_045512.2              | (1)     | -----                                                                           |       |       |       |       |       |       |       |
|                                                      |         | Section 945                                                                     |       |       |       |       |       |       |       |
| Candidatus Carsonella ruddii strain BT chromosome... | (72689) | 72689                                                                           | 72699 | 72710 | 72721 | 72732 | 72743 | 72754 | 72765 |
|                                                      | (72689) | CTTACAATAATTTATTAGATTTTTTAAATATAATTTAAAAAAATTTTAATATTTATAAAAAATATTATAATAATG     |       |       |       |       |       |       |       |
|                                                      | (1)     | -----                                                                           |       |       |       |       |       |       |       |
| Candidatus Carsonella 135557 - 167442nt              | (1)     | -----                                                                           |       |       |       |       |       |       |       |
| SARS-CoV-2 Reference Genome NC_045512.2              | (1)     | -----                                                                           |       |       |       |       |       |       |       |
|                                                      |         | Section 946                                                                     |       |       |       |       |       |       |       |
| Candidatus Carsonella ruddii strain BT chromosome... | (72766) | 72766                                                                           | 72776 | 72787 | 72798 | 72809 | 72820 | 72831 | 72842 |
|                                                      | (72766) | TCTAAATATTATGGATATATTAAAAAATATTTATTTAAGTTTAAATTTTATTAAAAATAATTCATTATTTGATAATG   |       |       |       |       |       |       |       |
|                                                      | (1)     | -----                                                                           |       |       |       |       |       |       |       |
| Candidatus Carsonella 135557 - 167442nt              | (1)     | -----                                                                           |       |       |       |       |       |       |       |
| SARS-CoV-2 Reference Genome NC_045512.2              | (1)     | -----                                                                           |       |       |       |       |       |       |       |
|                                                      |         | Section 947                                                                     |       |       |       |       |       |       |       |
| Candidatus Carsonella ruddii strain BT chromosome... | (72843) | 72843                                                                           | 72853 | 72864 | 72875 | 72886 | 72897 | 72908 | 72919 |
|                                                      | (72843) | ATATTAATTTAATTTCTTTAGTATTTAAATATTTTATATTTTATTTATTTATTTATTAATTAACATATCTAAAGTATTT |       |       |       |       |       |       |       |
|                                                      | (1)     | -----                                                                           |       |       |       |       |       |       |       |
| Candidatus Carsonella 135557 - 167442nt              | (1)     | -----                                                                           |       |       |       |       |       |       |       |
| SARS-CoV-2 Reference Genome NC_045512.2              | (1)     | -----                                                                           |       |       |       |       |       |       |       |
|                                                      |         | Section 948                                                                     |       |       |       |       |       |       |       |
| Candidatus Carsonella ruddii strain BT chromosome... | (72920) | 72920                                                                           | 72930 | 72941 | 72952 | 72963 | 72974 | 72985 | 72996 |
|                                                      | (72920) | ATTTATTTTAAAAATTTTATAAATAAATCAATTAATAAGAAAAATAGAAAAATTTTACTTTTTTTTATAAGTTTAAT   |       |       |       |       |       |       |       |
|                                                      | (1)     | -----                                                                           |       |       |       |       |       |       |       |
| Candidatus Carsonella 135557 - 167442nt              | (1)     | -----                                                                           |       |       |       |       |       |       |       |
| SARS-CoV-2 Reference Genome NC_045512.2              | (1)     | -----                                                                           |       |       |       |       |       |       |       |

|                                                      |         |                                                                                 |       |       |       |       |       |       |       |
|------------------------------------------------------|---------|---------------------------------------------------------------------------------|-------|-------|-------|-------|-------|-------|-------|
|                                                      |         | Section 949                                                                     |       |       |       |       |       |       |       |
| Candidatus Carsonella ruddii strain BT chromosome... | (72997) | 72997                                                                           | 73007 | 73018 | 73029 | 73040 | 73051 | 73062 | 73073 |
|                                                      | (72997) | TTTTTTTAAATATATTAATTTATAATTTATCAGATATTTTACCTAATGATTTATTAAAAAATATTTTAAAAAAGAAT   |       |       |       |       |       |       |       |
|                                                      | (1)     | -----                                                                           |       |       |       |       |       |       |       |
| Candidatus Carsonella 135557 - 167442nt              | (1)     | -----                                                                           |       |       |       |       |       |       |       |
| SARS-CoV-2 Reference Genome NC_045512.2              | (1)     | -----                                                                           |       |       |       |       |       |       |       |
|                                                      |         | Section 950                                                                     |       |       |       |       |       |       |       |
| Candidatus Carsonella ruddii strain BT chromosome... | (73074) | 73074                                                                           | 73084 | 73095 | 73106 | 73117 | 73128 | 73139 | 73150 |
|                                                      | (73074) | TTAATATTGTTGCTACTTCTAATATAAATATTACTTTTAGTTTTCTATAATTTCTTTTTTAATAATAAATTATTTA    |       |       |       |       |       |       |       |
|                                                      | (1)     | -----                                                                           |       |       |       |       |       |       |       |
| Candidatus Carsonella 135557 - 167442nt              | (1)     | -----                                                                           |       |       |       |       |       |       |       |
| SARS-CoV-2 Reference Genome NC_045512.2              | (1)     | -----                                                                           |       |       |       |       |       |       |       |
|                                                      |         | Section 951                                                                     |       |       |       |       |       |       |       |
| Candidatus Carsonella ruddii strain BT chromosome... | (73151) | 73151                                                                           | 73161 | 73172 | 73183 | 73194 | 73205 | 73216 | 73227 |
|                                                      | (73151) | TCAATTAAAAAAATGGTATCTCAAATTTTATTTTGTACTTTTTAAAAAATCCAATAAAAAAAATATATGTTTTT      |       |       |       |       |       |       |       |
|                                                      | (1)     | -----                                                                           |       |       |       |       |       |       |       |
| Candidatus Carsonella 135557 - 167442nt              | (1)     | -----                                                                           |       |       |       |       |       |       |       |
| SARS-CoV-2 Reference Genome NC_045512.2              | (1)     | -----                                                                           |       |       |       |       |       |       |       |
|                                                      |         | Section 952                                                                     |       |       |       |       |       |       |       |
| Candidatus Carsonella ruddii strain BT chromosome... | (73228) | 73228                                                                           | 73238 | 73249 | 73260 | 73271 | 73282 | 73293 | 73304 |
|                                                      | (73228) | TTTTAATTTTATAATTGAATTTATTTTCATTTGTAATGAAACCTATATCATTATCTTTAAGATTATTTGGTAATATTT  |       |       |       |       |       |       |       |
|                                                      | (1)     | -----                                                                           |       |       |       |       |       |       |       |
| Candidatus Carsonella 135557 - 167442nt              | (1)     | -----                                                                           |       |       |       |       |       |       |       |
| SARS-CoV-2 Reference Genome NC_045512.2              | (1)     | -----                                                                           |       |       |       |       |       |       |       |
|                                                      |         | Section 953                                                                     |       |       |       |       |       |       |       |
| Candidatus Carsonella ruddii strain BT chromosome... | (73305) | 73305                                                                           | 73315 | 73326 | 73337 | 73348 | 73359 | 73370 | 73381 |
|                                                      | (73305) | TTTCATCAGAAATAATATTTAATTTAATAAATAATATGAATATTTTTTTCAACATATTATTAAATTTATTATGGGGA   |       |       |       |       |       |       |       |
|                                                      | (1)     | -----                                                                           |       |       |       |       |       |       |       |
| Candidatus Carsonella 135557 - 167442nt              | (1)     | -----                                                                           |       |       |       |       |       |       |       |
| SARS-CoV-2 Reference Genome NC_045512.2              | (1)     | -----                                                                           |       |       |       |       |       |       |       |
|                                                      |         | Section 954                                                                     |       |       |       |       |       |       |       |
| Candidatus Carsonella ruddii strain BT chromosome... | (73382) | 73382                                                                           | 73392 | 73403 | 73414 | 73425 | 73436 | 73447 | 73458 |
|                                                      | (73382) | ATATTTTCATTATTTTAGTTTTACCTTTACAAGCTTATATTTTTACTACATTGATTACTATATATGTTTCACAATCATT |       |       |       |       |       |       |       |
|                                                      | (1)     | -----                                                                           |       |       |       |       |       |       |       |
| Candidatus Carsonella 135557 - 167442nt              | (1)     | -----                                                                           |       |       |       |       |       |       |       |
| SARS-CoV-2 Reference Genome NC_045512.2              | (1)     | -----                                                                           |       |       |       |       |       |       |       |

## SARS-CoV-2 &amp; Bakterien.apr

|                                                      |         |                                                                              |       |       |       |       |       |       |       |
|------------------------------------------------------|---------|------------------------------------------------------------------------------|-------|-------|-------|-------|-------|-------|-------|
|                                                      |         | Section 955                                                                  |       |       |       |       |       |       |       |
| Candidatus Carsonella ruddii strain BT chromosome... | (73459) | 73459                                                                        | 73469 | 73480 | 73491 | 73502 | 73513 | 73524 | 73535 |
|                                                      | (73459) | AAAACATTAAATATATGGAAAAATTTTAATATTATCATCTGCAATAATGATGGGATTAGCATCAGTAGGTACTGGA |       |       |       |       |       |       |       |
|                                                      | (1)     | -----                                                                        |       |       |       |       |       |       |       |
| Candidatus Carsonella 135557 - 167442nt              | (1)     | -----                                                                        |       |       |       |       |       |       |       |
| SARS-CoV-2 Reference Genome NC_045512.2              | (1)     | -----                                                                        |       |       |       |       |       |       |       |
|                                                      |         | Section 956                                                                  |       |       |       |       |       |       |       |
| Candidatus Carsonella ruddii strain BT chromosome... | (73536) | 73536                                                                        | 73546 | 73557 | 73568 | 73579 | 73590 | 73601 | 73612 |
|                                                      | (73536) | ATTGGATTGGTTTTTTAGGAGGTAAATTGTTAGAATCTATTTCAAGACAACCTGAATTAGATAATTTATTGTTAAC |       |       |       |       |       |       |       |
|                                                      | (1)     | -----                                                                        |       |       |       |       |       |       |       |
| Candidatus Carsonella 135557 - 167442nt              | (1)     | -----                                                                        |       |       |       |       |       |       |       |
| SARS-CoV-2 Reference Genome NC_045512.2              | (1)     | -----                                                                        |       |       |       |       |       |       |       |
|                                                      |         | Section 957                                                                  |       |       |       |       |       |       |       |
| Candidatus Carsonella ruddii strain BT chromosome... | (73613) | 73613                                                                        | 73623 | 73634 | 73645 | 73656 | 73667 | 73678 | 73689 |
|                                                      | (73613) | TAGAACATTTTTAATAACTGGTTTGCTAGATGCAGTACCAATGATAAGTGTAGGTATAGGATTGTATATTATTTTA |       |       |       |       |       |       |       |
|                                                      | (1)     | -----                                                                        |       |       |       |       |       |       |       |
| Candidatus Carsonella 135557 - 167442nt              | (1)     | -----                                                                        |       |       |       |       |       |       |       |
| SARS-CoV-2 Reference Genome NC_045512.2              | (1)     | -----                                                                        |       |       |       |       |       |       |       |
|                                                      |         | Section 958                                                                  |       |       |       |       |       |       |       |
| Candidatus Carsonella ruddii strain BT chromosome... | (73690) | 73690                                                                        | 73700 | 73711 | 73722 | 73733 | 73744 | 73755 | 73766 |
|                                                      | (73690) | TATTATCAAATAAATAATATGAATATAAATTTTACATTAATTAATGAATTTTTATCTTTTTTAATTTTTTTGTTTT |       |       |       |       |       |       |       |
|                                                      | (1)     | -----                                                                        |       |       |       |       |       |       |       |
| Candidatus Carsonella 135557 - 167442nt              | (1)     | -----                                                                        |       |       |       |       |       |       |       |
| SARS-CoV-2 Reference Genome NC_045512.2              | (1)     | -----                                                                        |       |       |       |       |       |       |       |
|                                                      |         | Section 959                                                                  |       |       |       |       |       |       |       |
| Candidatus Carsonella ruddii strain BT chromosome... | (73767) | 73767                                                                        | 73777 | 73788 | 73799 | 73810 | 73821 | 73832 | 73843 |
|                                                      | (73767) | TTCATTTATTTTTATTTTCCTAAAATTATAAATATTATAAATTATAATGATTTAAATGATTTTAAAAACAAAATTT |       |       |       |       |       |       |       |
|                                                      | (1)     | -----                                                                        |       |       |       |       |       |       |       |
| Candidatus Carsonella 135557 - 167442nt              | (1)     | -----                                                                        |       |       |       |       |       |       |       |
| SARS-CoV-2 Reference Genome NC_045512.2              | (1)     | -----                                                                        |       |       |       |       |       |       |       |
|                                                      |         | Section 960                                                                  |       |       |       |       |       |       |       |
| Candidatus Carsonella ruddii strain BT chromosome... | (73844) | 73844                                                                        | 73854 | 73865 | 73876 | 73887 | 73898 | 73909 | 73920 |
|                                                      | (73844) | TTTTAAATTATAACAAAACATTAGAAAATAATTTAATTAAAAAATATTTATAATAGAATTTGAAATTCAAAAACAA |       |       |       |       |       |       |       |
|                                                      | (1)     | -----                                                                        |       |       |       |       |       |       |       |
| Candidatus Carsonella 135557 - 167442nt              | (1)     | -----                                                                        |       |       |       |       |       |       |       |
| SARS-CoV-2 Reference Genome NC_045512.2              | (1)     | -----                                                                        |       |       |       |       |       |       |       |



## SARS-CoV-2 &amp; Bakterien.apr

|                                                      |         |                                                                                   |                       |                       |                       |                       |                       |                       |                       |
|------------------------------------------------------|---------|-----------------------------------------------------------------------------------|-----------------------|-----------------------|-----------------------|-----------------------|-----------------------|-----------------------|-----------------------|
|                                                      |         |                                                                                   |                       |                       |                       |                       |                       |                       | Section 961           |
|                                                      | (73921) | <a href="#">73921</a>                                                             | <a href="#">73931</a> | <a href="#">73942</a> | <a href="#">73953</a> | <a href="#">73964</a> | <a href="#">73975</a> | <a href="#">73986</a> | <a href="#">73997</a> |
| Candidatus Carsonella ruddii strain BT chromosome... | (73921) | TTTGACAAAAATATTAAAAATATAAATAATAATATATTAAAAAAAAAAAAATTTTTTACTTGATATTATAATATTAGA    |                       |                       |                       |                       |                       |                       |                       |
| Candidatus Carsonella 135557 - 167442nt              | (1)     | -----                                                                             |                       |                       |                       |                       |                       |                       |                       |
| SARS-CoV-2 Reference Genome NC_045512.2              | (1)     | -----                                                                             |                       |                       |                       |                       |                       |                       |                       |
|                                                      |         |                                                                                   |                       |                       |                       |                       |                       |                       | Section 962           |
|                                                      | (73998) | <a href="#">73998</a>                                                             | <a href="#">74008</a> | <a href="#">74019</a> | <a href="#">74030</a> | <a href="#">74041</a> | <a href="#">74052</a> | <a href="#">74063</a> | <a href="#">74074</a> |
| Candidatus Carsonella ruddii strain BT chromosome... | (73998) | AAAAAATTTTTTTATTAAAAAAATTAAAAAAATTTTTTAATTTAATAAATTATAAATTATATTAAAAATTTTTTATAATG  |                       |                       |                       |                       |                       |                       |                       |
| Candidatus Carsonella 135557 - 167442nt              | (1)     | -----                                                                             |                       |                       |                       |                       |                       |                       |                       |
| SARS-CoV-2 Reference Genome NC_045512.2              | (1)     | -----                                                                             |                       |                       |                       |                       |                       |                       |                       |
|                                                      |         |                                                                                   |                       |                       |                       |                       |                       |                       | Section 963           |
|                                                      | (74075) | <a href="#">74075</a>                                                             | <a href="#">74085</a> | <a href="#">74096</a> | <a href="#">74107</a> | <a href="#">74118</a> | <a href="#">74129</a> | <a href="#">74140</a> | <a href="#">74151</a> |
| Candidatus Carsonella ruddii strain BT chromosome... | (74075) | AATTAAAAATAAATTTGTACAAATTTTTAAAAAAATTTTTTAATAATATTATAAATTATAACAAGAATTTATTATA      |                       |                       |                       |                       |                       |                       |                       |
| Candidatus Carsonella 135557 - 167442nt              | (1)     | -----                                                                             |                       |                       |                       |                       |                       |                       |                       |
| SARS-CoV-2 Reference Genome NC_045512.2              | (1)     | -----                                                                             |                       |                       |                       |                       |                       |                       |                       |
|                                                      |         |                                                                                   |                       |                       |                       |                       |                       |                       | Section 964           |
|                                                      | (74152) | <a href="#">74152</a>                                                             | <a href="#">74162</a> | <a href="#">74173</a> | <a href="#">74184</a> | <a href="#">74195</a> | <a href="#">74206</a> | <a href="#">74217</a> | <a href="#">74228</a> |
| Candidatus Carsonella ruddii strain BT chromosome... | (74152) | ATATGAATATTTTTTTTTTTTAAAAAATATAAAATAAAAAATTATCAAAAAGAATTTTTTTTTTTGTTTTTTATAAGTTTA |                       |                       |                       |                       |                       |                       |                       |
| Candidatus Carsonella 135557 - 167442nt              | (1)     | -----                                                                             |                       |                       |                       |                       |                       |                       |                       |
| SARS-CoV-2 Reference Genome NC_045512.2              | (1)     | -----                                                                             |                       |                       |                       |                       |                       |                       |                       |
|                                                      |         |                                                                                   |                       |                       |                       |                       |                       |                       | Section 965           |
|                                                      | (74229) | <a href="#">74229</a>                                                             | <a href="#">74239</a> | <a href="#">74250</a> | <a href="#">74261</a> | <a href="#">74272</a> | <a href="#">74283</a> | <a href="#">74294</a> | <a href="#">74305</a> |
| Candidatus Carsonella ruddii strain BT chromosome... | (74229) | ATATTATTAAAAAAAATATAAAAAAGAATATTAAAAAAAATAAAAAAATTATATTTAATAATAAAATTGAAAA         |                       |                       |                       |                       |                       |                       |                       |
| Candidatus Carsonella 135557 - 167442nt              | (1)     | -----                                                                             |                       |                       |                       |                       |                       |                       |                       |
| SARS-CoV-2 Reference Genome NC_045512.2              | (1)     | -----                                                                             |                       |                       |                       |                       |                       |                       |                       |
|                                                      |         |                                                                                   |                       |                       |                       |                       |                       |                       | Section 966           |
|                                                      | (74306) | <a href="#">74306</a>                                                             | <a href="#">74316</a> | <a href="#">74327</a> | <a href="#">74338</a> | <a href="#">74349</a> | <a href="#">74360</a> | <a href="#">74371</a> | <a href="#">74382</a> |
| Candidatus Carsonella ruddii strain BT chromosome... | (74306) | ATATTTAATAAAAAATTGTAGTTAAAAAATATGAATAATTATGGTATTATTAATAAAAATATATGATGGAATAGTAGAA   |                       |                       |                       |                       |                       |                       |                       |
| Candidatus Carsonella 135557 - 167442nt              | (1)     | -----                                                                             |                       |                       |                       |                       |                       |                       |                       |
| SARS-CoV-2 Reference Genome NC_045512.2              | (1)     | -----                                                                             |                       |                       |                       |                       |                       |                       |                       |

## SARS-CoV-2 &amp; Bakterien.apr

|                                                      |         |                                                                                 |       |       |       |       |       |       |       |
|------------------------------------------------------|---------|---------------------------------------------------------------------------------|-------|-------|-------|-------|-------|-------|-------|
| Section 967                                          |         |                                                                                 |       |       |       |       |       |       |       |
| Candidatus Carsonella ruddii strain BT chromosome... | (74383) | 74383                                                                           | 74393 | 74404 | 74415 | 74426 | 74437 | 74448 | 74459 |
| Candidatus Carsonella 135557 - 167442nt              | (74383) | GTAAATGGATTAAATTCCGCAAAATATGGTGAAATGATTCTTTTTGAAAACGATCAAAAAGGAATAGTTTTTAGTTT   |       |       |       |       |       |       |       |
| SARS-CoV-2 Reference Genome NC_045512.2              | (1)     | -----                                                                           |       |       |       |       |       |       |       |
|                                                      | (1)     | -----                                                                           |       |       |       |       |       |       |       |
| Section 968                                          |         |                                                                                 |       |       |       |       |       |       |       |
| Candidatus Carsonella ruddii strain BT chromosome... | (74460) | 74460                                                                           | 74470 | 74481 | 74492 | 74503 | 74514 | 74525 | 74536 |
| Candidatus Carsonella 135557 - 167442nt              | (74460) | AAACAAAAATAATGTTAATATTGTATTATTAAATAATTTTGAAAATTTAAACAAGGACAAAAATGTTTTGTACTA     |       |       |       |       |       |       |       |
| SARS-CoV-2 Reference Genome NC_045512.2              | (1)     | -----                                                                           |       |       |       |       |       |       |       |
|                                                      | (1)     | -----                                                                           |       |       |       |       |       |       |       |
| Section 969                                          |         |                                                                                 |       |       |       |       |       |       |       |
| Candidatus Carsonella ruddii strain BT chromosome... | (74537) | 74537                                                                           | 74547 | 74558 | 74569 | 74580 | 74591 | 74602 | 74613 |
| Candidatus Carsonella 135557 - 167442nt              | (74537) | ATAAAATATTTGAAGTACCTGTTGGTTATGAATTAATTGGAAGAATTATAAATTCAAAAGGAGAGTTTATAGATAAT   |       |       |       |       |       |       |       |
| SARS-CoV-2 Reference Genome NC_045512.2              | (1)     | -----                                                                           |       |       |       |       |       |       |       |
|                                                      | (1)     | -----                                                                           |       |       |       |       |       |       |       |
| Section 970                                          |         |                                                                                 |       |       |       |       |       |       |       |
| Candidatus Carsonella ruddii strain BT chromosome... | (74614) | 74614                                                                           | 74624 | 74635 | 74646 | 74657 | 74668 | 74679 | 74690 |
| Candidatus Carsonella 135557 - 167442nt              | (74614) | AAAAAAAAATATTAATATTTTTTAAAAAAGACATAATTGAAAAAATAGCTCCAGGAGTAATGGAAAGAGAATCTGTGAA |       |       |       |       |       |       |       |
| SARS-CoV-2 Reference Genome NC_045512.2              | (1)     | -----                                                                           |       |       |       |       |       |       |       |
|                                                      | (1)     | -----                                                                           |       |       |       |       |       |       |       |
| Section 971                                          |         |                                                                                 |       |       |       |       |       |       |       |
| Candidatus Carsonella ruddii strain BT chromosome... | (74691) | 74691                                                                           | 74701 | 74712 | 74723 | 74734 | 74745 | 74756 | 74767 |
| Candidatus Carsonella 135557 - 167442nt              | (74691) | TGAACCATTATTAACAGGAATAAAATCTATTGATTGTATGATACCAATAGGTAAAGGACAAAGAGAATTAATTATAG   |       |       |       |       |       |       |       |
| SARS-CoV-2 Reference Genome NC_045512.2              | (1)     | -----                                                                           |       |       |       |       |       |       |       |
|                                                      | (1)     | -----                                                                           |       |       |       |       |       |       |       |
| Section 972                                          |         |                                                                                 |       |       |       |       |       |       |       |
| Candidatus Carsonella ruddii strain BT chromosome... | (74768) | 74768                                                                           | 74778 | 74789 | 74800 | 74811 | 74822 | 74833 | 74844 |
| Candidatus Carsonella 135557 - 167442nt              | (74768) | GAGATAGACAAACCGGGAAAACAACAATAGCTATTGATTCTATTATTAATCAAAAAAATAAAATGTAATTTGTATA    |       |       |       |       |       |       |       |
| SARS-CoV-2 Reference Genome NC_045512.2              | (1)     | -----                                                                           |       |       |       |       |       |       |       |
|                                                      | (1)     | -----                                                                           |       |       |       |       |       |       |       |

## SARS-CoV-2 &amp; Bakterien.apr

|                                                      |         |                                                                                |       |       |       |       |       |       |       |
|------------------------------------------------------|---------|--------------------------------------------------------------------------------|-------|-------|-------|-------|-------|-------|-------|
| Section 973                                          |         |                                                                                |       |       |       |       |       |       |       |
| Candidatus Carsonella ruddii strain BT chromosome... | (74845) | 74845                                                                          | 74855 | 74866 | 74877 | 74888 | 74899 | 74910 | 74921 |
| Candidatus Carsonella 135557 - 167442nt              | (74845) | TATGTATGTATAGGTCAAAAAATTTCTTCATTAATAAAATGTAATTAATAAACTTAAAAAATTTAATTGTTTAGAATA |       |       |       |       |       |       |       |
| SARS-CoV-2 Reference Genome NC_045512.2              | (1)     | -----                                                                          |       |       |       |       |       |       |       |
|                                                      | (1)     | -----                                                                          |       |       |       |       |       |       |       |
| Section 974                                          |         |                                                                                |       |       |       |       |       |       |       |
| Candidatus Carsonella ruddii strain BT chromosome... | (74922) | 74922                                                                          | 74932 | 74943 | 74954 | 74965 | 74976 | 74987 | 74998 |
| Candidatus Carsonella 135557 - 167442nt              | (74922) | TACAATTATTATAGCAGCTACTGCTGCTGATTGCGCAGCGGAACAATATATAGCTCCATATACAGGTTGTACAATAG  |       |       |       |       |       |       |       |
| SARS-CoV-2 Reference Genome NC_045512.2              | (1)     | -----                                                                          |       |       |       |       |       |       |       |
|                                                      | (1)     | -----                                                                          |       |       |       |       |       |       |       |
| Section 975                                          |         |                                                                                |       |       |       |       |       |       |       |
| Candidatus Carsonella ruddii strain BT chromosome... | (74999) | 74999                                                                          | 75009 | 75020 | 75031 | 75042 | 75053 | 75064 | 75075 |
| Candidatus Carsonella 135557 - 167442nt              | (74999) | GAGAATATTTTCAGAGATTTAGGAAAAGATTGTTTAATTATTTATGATGATTTAACTAAACATGCTTGGTCTTATAGA |       |       |       |       |       |       |       |
| SARS-CoV-2 Reference Genome NC_045512.2              | (1)     | -----                                                                          |       |       |       |       |       |       |       |
|                                                      | (1)     | -----                                                                          |       |       |       |       |       |       |       |
| Section 976                                          |         |                                                                                |       |       |       |       |       |       |       |
| Candidatus Carsonella ruddii strain BT chromosome... | (75076) | 75076                                                                          | 75086 | 75097 | 75108 | 75119 | 75130 | 75141 | 75152 |
| Candidatus Carsonella 135557 - 167442nt              | (75076) | CAAATATCTCTTTTATTAAAAAGACCTCCTGGAAGGGAAGCATATCCAGGTGATGTTTTTTATTTACATTCTAGATT  |       |       |       |       |       |       |       |
| SARS-CoV-2 Reference Genome NC_045512.2              | (1)     | -----                                                                          |       |       |       |       |       |       |       |
|                                                      | (1)     | -----                                                                          |       |       |       |       |       |       |       |
| Section 977                                          |         |                                                                                |       |       |       |       |       |       |       |
| Candidatus Carsonella ruddii strain BT chromosome... | (75153) | 75153                                                                          | 75163 | 75174 | 75185 | 75196 | 75207 | 75218 | 75229 |
| Candidatus Carsonella 135557 - 167442nt              | (75153) | ATTAGAAAGATCTTCTAAAGTTAATAAAATATTTTTAGAAAAAAAAAATATTTTAAACAAAAATAATGGTACTCTTA  |       |       |       |       |       |       |       |
| SARS-CoV-2 Reference Genome NC_045512.2              | (1)     | -----                                                                          |       |       |       |       |       |       |       |
|                                                      | (1)     | -----                                                                          |       |       |       |       |       |       |       |
| Section 978                                          |         |                                                                                |       |       |       |       |       |       |       |
| Candidatus Carsonella ruddii strain BT chromosome... | (75230) | 75230                                                                          | 75240 | 75251 | 75262 | 75273 | 75284 | 75295 | 75306 |
| Candidatus Carsonella 135557 - 167442nt              | (75230) | CTGCTTTTCCAATTATAGAACTTTAGAAAGGTGATGTAACCTTCATTTATACCTACTAATGTTATTTCTATTACTGAT |       |       |       |       |       |       |       |
| SARS-CoV-2 Reference Genome NC_045512.2              | (1)     | -----                                                                          |       |       |       |       |       |       |       |
|                                                      | (1)     | -----                                                                          |       |       |       |       |       |       |       |

## SARS-CoV-2 &amp; Bakterien.apr

|                                                      |         |                                                                                 |       |       |       |       |       |             |       |
|------------------------------------------------------|---------|---------------------------------------------------------------------------------|-------|-------|-------|-------|-------|-------------|-------|
|                                                      |         |                                                                                 |       |       |       |       |       | Section 979 |       |
| Candidatus Carsonella ruddii strain BT chromosome... | (75307) | 75307                                                                           | 75317 | 75328 | 75339 | 75350 | 75361 | 75372       | 75383 |
| Candidatus Carsonella 135557 - 167442nt              | (75307) | GGACAAATTTTTTTAGATACTAATTTATTTAATTCAGGAATAAGACCTGCTATTAAATGTTGGTTTATCAGTTTCAAG  |       |       |       |       |       |             |       |
| SARS-CoV-2 Reference Genome NC_045512.2              | (1)     | -----                                                                           |       |       |       |       |       |             |       |
|                                                      | (1)     | -----                                                                           |       |       |       |       |       |             |       |
|                                                      |         |                                                                                 |       |       |       |       |       | Section 980 |       |
| Candidatus Carsonella ruddii strain BT chromosome... | (75384) | 75384                                                                           | 75394 | 75405 | 75416 | 75427 | 75438 | 75449       | 75460 |
| Candidatus Carsonella 135557 - 167442nt              | (75384) | AGTAGGAGGCTCTGCTCAATTTAAAATTATAAAAAAATTAAGTGGAGATATTAGAATAATGTTAGCTCAATATCGAG   |       |       |       |       |       |             |       |
| SARS-CoV-2 Reference Genome NC_045512.2              | (1)     | -----                                                                           |       |       |       |       |       |             |       |
|                                                      | (1)     | -----                                                                           |       |       |       |       |       |             |       |
|                                                      |         |                                                                                 |       |       |       |       |       | Section 981 |       |
| Candidatus Carsonella ruddii strain BT chromosome... | (75461) | 75461                                                                           | 75471 | 75482 | 75493 | 75504 | 75515 | 75526       | 75537 |
| Candidatus Carsonella 135557 - 167442nt              | (75461) | AATTAGAATCTTTTTCTAAATTTTCTTCAGATTTAGATATAGAACTAAAAATCAATTGTTTAATGGGGAAAAAATA    |       |       |       |       |       |             |       |
| SARS-CoV-2 Reference Genome NC_045512.2              | (1)     | -----                                                                           |       |       |       |       |       |             |       |
|                                                      | (1)     | -----                                                                           |       |       |       |       |       |             |       |
|                                                      |         |                                                                                 |       |       |       |       |       | Section 982 |       |
| Candidatus Carsonella ruddii strain BT chromosome... | (75538) | 75538                                                                           | 75548 | 75559 | 75570 | 75581 | 75592 | 75603       | 75614 |
| Candidatus Carsonella 135557 - 167442nt              | (75538) | ACTTTATTAATGAAACAAAAACCTAAGTTTAAATTATTCTATTATTGAATTAACATTAGTTTTATTAATTATTAAAAA  |       |       |       |       |       |             |       |
| SARS-CoV-2 Reference Genome NC_045512.2              | (1)     | -----                                                                           |       |       |       |       |       |             |       |
|                                                      | (1)     | -----                                                                           |       |       |       |       |       |             |       |
|                                                      |         |                                                                                 |       |       |       |       |       | Section 983 |       |
| Candidatus Carsonella ruddii strain BT chromosome... | (75615) | 75615                                                                           | 75625 | 75636 | 75647 | 75658 | 75669 | 75680       | 75691 |
| Candidatus Carsonella 135557 - 167442nt              | (75615) | TAAATATTTTGTAAAAATACCAGTTAATCAAATAGAATATTTTGAATATAATATTATAAAATATTTAAGAAATTTAA   |       |       |       |       |       |             |       |
| SARS-CoV-2 Reference Genome NC_045512.2              | (1)     | -----                                                                           |       |       |       |       |       |             |       |
|                                                      | (1)     | -----                                                                           |       |       |       |       |       |             |       |
|                                                      |         |                                                                                 |       |       |       |       |       | Section 984 |       |
| Candidatus Carsonella ruddii strain BT chromosome... | (75692) | 75692                                                                           | 75702 | 75713 | 75724 | 75735 | 75746 | 75757       | 75768 |
| Candidatus Carsonella 135557 - 167442nt              | (75692) | ATTTTGAAAAAATTATAAATATTAATAATAAAAAATTTAGAAAATTATTTATTAGAAATAATAAATTATTTTCATATTT |       |       |       |       |       |             |       |
| SARS-CoV-2 Reference Genome NC_045512.2              | (1)     | -----                                                                           |       |       |       |       |       |             |       |
|                                                      | (1)     | -----                                                                           |       |       |       |       |       |             |       |

## SARS-CoV-2 &amp; Bakterien.apr

|                                                      |         |                                                                                |       |       |       |       |       |       |       |
|------------------------------------------------------|---------|--------------------------------------------------------------------------------|-------|-------|-------|-------|-------|-------|-------|
|                                                      |         | Section 985                                                                    |       |       |       |       |       |       |       |
| Candidatus Carsonella ruddii strain BT chromosome... | (75769) | 75769                                                                          | 75779 | 75790 | 75801 | 75812 | 75823 | 75834 | 75845 |
|                                                      | (75769) | GGAAGTTTATTATGAATATAAGAGATATTAAAAATAAAATTAATATTTTATTTAATATAAAATAAATTAACAAATACA |       |       |       |       |       |       |       |
|                                                      | (1)     | -----                                                                          |       |       |       |       |       |       |       |
| Candidatus Carsonella 135557 - 167442nt              | (1)     | -----                                                                          |       |       |       |       |       |       |       |
| SARS-CoV-2 Reference Genome NC_045512.2              | (1)     | -----                                                                          |       |       |       |       |       |       |       |
|                                                      |         | Section 986                                                                    |       |       |       |       |       |       |       |
| Candidatus Carsonella ruddii strain BT chromosome... | (75846) | 75846                                                                          | 75856 | 75867 | 75878 | 75889 | 75900 | 75911 | 75922 |
|                                                      | (75846) | ATGAGTATGATTTTCATTTTCAAAAATGAAAAAATTTTAAAAAATGTTTAATACTTAATAAATTATATTTAGAAAC   |       |       |       |       |       |       |       |
|                                                      | (1)     | -----                                                                          |       |       |       |       |       |       |       |
| Candidatus Carsonella 135557 - 167442nt              | (1)     | -----                                                                          |       |       |       |       |       |       |       |
| SARS-CoV-2 Reference Genome NC_045512.2              | (1)     | -----                                                                          |       |       |       |       |       |       |       |
|                                                      |         | Section 987                                                                    |       |       |       |       |       |       |       |
| Candidatus Carsonella ruddii strain BT chromosome... | (75923) | 75923                                                                          | 75933 | 75944 | 75955 | 75966 | 75977 | 75988 | 75999 |
|                                                      | (75923) | AAAAAAAATAATTTTTGAAATTTATAATTTTAAAAACAATAATTTTTTTTGTGTGTATTAAATTACAACAAATAAAG  |       |       |       |       |       |       |       |
|                                                      | (1)     | -----                                                                          |       |       |       |       |       |       |       |
| Candidatus Carsonella 135557 - 167442nt              | (1)     | -----                                                                          |       |       |       |       |       |       |       |
| SARS-CoV-2 Reference Genome NC_045512.2              | (1)     | -----                                                                          |       |       |       |       |       |       |       |
|                                                      |         | Section 988                                                                    |       |       |       |       |       |       |       |
| Candidatus Carsonella ruddii strain BT chromosome... | (76000) | 76000                                                                          | 76010 | 76021 | 76032 | 76043 | 76054 | 76065 | 76076 |
|                                                      | (76000) | GTTTTTGTGGAATATTAATAGTGAAATTATTAAATATTGTTTAAAAATTTTAAAAAATAATATAAATTTAGATTTA   |       |       |       |       |       |       |       |
|                                                      | (1)     | -----                                                                          |       |       |       |       |       |       |       |
| Candidatus Carsonella 135557 - 167442nt              | (1)     | -----                                                                          |       |       |       |       |       |       |       |
| SARS-CoV-2 Reference Genome NC_045512.2              | (1)     | -----                                                                          |       |       |       |       |       |       |       |
|                                                      |         | Section 989                                                                    |       |       |       |       |       |       |       |
| Candidatus Carsonella ruddii strain BT chromosome... | (76077) | 76077                                                                          | 76087 | 76098 | 76109 | 76120 | 76131 | 76142 | 76153 |
|                                                      | (76077) | ATAATAATTGGTAAAAAGCTATTGATTTTTTTTAATAAAAAAATATATATATTAAAAAATAATGTTTTTAATGA     |       |       |       |       |       |       |       |
|                                                      | (1)     | -----                                                                          |       |       |       |       |       |       |       |
| Candidatus Carsonella 135557 - 167442nt              | (1)     | -----                                                                          |       |       |       |       |       |       |       |
| SARS-CoV-2 Reference Genome NC_045512.2              | (1)     | -----                                                                          |       |       |       |       |       |       |       |
|                                                      |         | Section 990                                                                    |       |       |       |       |       |       |       |
| Candidatus Carsonella ruddii strain BT chromosome... | (76154) | 76154                                                                          | 76164 | 76175 | 76186 | 76197 | 76208 | 76219 | 76230 |
|                                                      | (76154) | AAAAAATGAAATTTTTTTTTTCAAATGAAATTTTAAACATTTTAAATATTATGAAAATGTTTTTTTTTTAAGTTCAA  |       |       |       |       |       |       |       |
|                                                      | (1)     | -----                                                                          |       |       |       |       |       |       |       |
| Candidatus Carsonella 135557 - 167442nt              | (1)     | -----                                                                          |       |       |       |       |       |       |       |
| SARS-CoV-2 Reference Genome NC_045512.2              | (1)     | -----                                                                          |       |       |       |       |       |       |       |

## SARS-CoV-2 &amp; Bakterien.apr

|                                                      |         |                                                                                |       |       |       |       |       |             |       |
|------------------------------------------------------|---------|--------------------------------------------------------------------------------|-------|-------|-------|-------|-------|-------------|-------|
|                                                      |         |                                                                                |       |       |       |       |       | Section 991 |       |
| Candidatus Carsonella ruddii strain BT chromosome... | (76231) | 76231                                                                          | 76241 | 76252 | 76263 | 76274 | 76285 | 76296       | 76307 |
| Candidatus Carsonella 135557 - 167442nt              | (76231) | AAATTATTAATAATAGTATTAAAAATAATAAGACTAATTTATATGAAAAAATTAAAAAAATTTTATGAAATTAAT    |       |       |       |       |       |             |       |
| SARS-CoV-2 Reference Genome NC_045512.2              | (1)     | -----                                                                          |       |       |       |       |       |             |       |
|                                                      | (1)     | -----                                                                          |       |       |       |       |       |             |       |
|                                                      |         |                                                                                |       |       |       |       |       | Section 992 |       |
| Candidatus Carsonella ruddii strain BT chromosome... | (76308) | 76308                                                                          | 76318 | 76329 | 76340 | 76351 | 76362 | 76373       | 76384 |
| Candidatus Carsonella 135557 - 167442nt              | (76308) | ATAAATTATAATGATATAATTAATAATTATTTAAATTTTGTTTAAATTATTTATATTCAGAAAATTATTTTCTGA    |       |       |       |       |       |             |       |
| SARS-CoV-2 Reference Genome NC_045512.2              | (1)     | -----                                                                          |       |       |       |       |       |             |       |
|                                                      | (1)     | -----                                                                          |       |       |       |       |       |             |       |
|                                                      |         |                                                                                |       |       |       |       |       | Section 993 |       |
| Candidatus Carsonella ruddii strain BT chromosome... | (76385) | 76385                                                                          | 76395 | 76406 | 76417 | 76428 | 76439 | 76450       | 76461 |
| Candidatus Carsonella 135557 - 167442nt              | (76385) | ATTAAAAATTAGAATGACTACTATGAGATCAGCTGCTGATAGTTCAAAAAAATTATAAAAAACATGAATTTAATTA   |       |       |       |       |       |             |       |
| SARS-CoV-2 Reference Genome NC_045512.2              | (1)     | -----                                                                          |       |       |       |       |       |             |       |
|                                                      | (1)     | -----                                                                          |       |       |       |       |       |             |       |
|                                                      |         |                                                                                |       |       |       |       |       | Section 994 |       |
| Candidatus Carsonella ruddii strain BT chromosome... | (76462) | 76462                                                                          | 76472 | 76483 | 76494 | 76505 | 76516 | 76527       | 76538 |
| Candidatus Carsonella 135557 - 167442nt              | (76462) | AAAATAAAATTAGACAATTCAAAGTTACTCAAGAAATGTTAGAAATAATAAATAGTATTAATTTATGATAGGAAGAA  |       |       |       |       |       |             |       |
| SARS-CoV-2 Reference Genome NC_045512.2              | (1)     | -----                                                                          |       |       |       |       |       |             |       |
|                                                      | (1)     | -----                                                                          |       |       |       |       |       |             |       |
|                                                      |         |                                                                                |       |       |       |       |       | Section 995 |       |
| Candidatus Carsonella ruddii strain BT chromosome... | (76539) | 76539                                                                          | 76549 | 76560 | 76571 | 76582 | 76593 | 76604       | 76615 |
| Candidatus Carsonella 135557 - 167442nt              | (76539) | TAATACAAGTATTAGGTTCAATTTTAGATGTTGAATTTAAAAAATAATACCAAAATTTATAATGCTTTATTT       |       |       |       |       |       |             |       |
| SARS-CoV-2 Reference Genome NC_045512.2              | (1)     | -----                                                                          |       |       |       |       |       |             |       |
|                                                      | (1)     | -----                                                                          |       |       |       |       |       |             |       |
|                                                      |         |                                                                                |       |       |       |       |       | Section 996 |       |
| Candidatus Carsonella ruddii strain BT chromosome... | (76616) | 76616                                                                          | 76626 | 76637 | 76648 | 76659 | 76670 | 76681       | 76692 |
| Candidatus Carsonella 135557 - 167442nt              | (76616) | ATACCTGAAGTAAATATTTTTTTAGAAAGTTCAACAACAAATTGGACAGAATATTGTCAGAACTATTGCTTTTGGTAA |       |       |       |       |       |             |       |
| SARS-CoV-2 Reference Genome NC_045512.2              | (1)     | -----                                                                          |       |       |       |       |       |             |       |
|                                                      | (1)     | -----                                                                          |       |       |       |       |       |             |       |

## SARS-CoV-2 &amp; Bakterien.apr

|                                                      |         |                                                                                |       |       |       |       |       |       |       |
|------------------------------------------------------|---------|--------------------------------------------------------------------------------|-------|-------|-------|-------|-------|-------|-------|
| Section 997                                          |         |                                                                                |       |       |       |       |       |       |       |
| Candidatus Carsonella ruddii strain BT chromosome... | (76693) | 76693                                                                          | 76703 | 76714 | 76725 | 76736 | 76747 | 76758 | 76769 |
| Candidatus Carsonella 135557 - 167442nt              | (76693) | TACTAATGGAATTAAAAGAAATTCTATTGTTTTAGATACAAACAAACCAATAATGACACCTGTAGGTGATTGTACTC  |       |       |       |       |       |       |       |
| SARS-CoV-2 Reference Genome NC_045512.2              | (1)     | -----                                                                          |       |       |       |       |       |       |       |
|                                                      | (1)     | -----                                                                          |       |       |       |       |       |       |       |
| Section 998                                          |         |                                                                                |       |       |       |       |       |       |       |
| Candidatus Carsonella ruddii strain BT chromosome... | (76770) | 76770                                                                          | 76780 | 76791 | 76802 | 76813 | 76824 | 76835 | 76846 |
| Candidatus Carsonella 135557 - 167442nt              | (76770) | TCGGAAGAATAATTAATGTATTAGGAGAACCAATAGATAATAAAGGAAATTTAAAATTTTTTAAAAAAAAAACCAATT |       |       |       |       |       |       |       |
| SARS-CoV-2 Reference Genome NC_045512.2              | (1)     | -----                                                                          |       |       |       |       |       |       |       |
|                                                      | (1)     | -----                                                                          |       |       |       |       |       |       |       |
| Section 999                                          |         |                                                                                |       |       |       |       |       |       |       |
| Candidatus Carsonella ruddii strain BT chromosome... | (76847) | 76847                                                                          | 76857 | 76868 | 76879 | 76890 | 76901 | 76912 | 76923 |
| Candidatus Carsonella 135557 - 167442nt              | (76847) | CATTTAAATCCTCCTAAATTTTCAGATCAGATTTTACAAATAATATATTAGAACTGGAATTAAAATAATAGATTT    |       |       |       |       |       |       |       |
| SARS-CoV-2 Reference Genome NC_045512.2              | (1)     | -----                                                                          |       |       |       |       |       |       |       |
|                                                      | (1)     | -----                                                                          |       |       |       |       |       |       |       |
| Section 1000                                         |         |                                                                                |       |       |       |       |       |       |       |
| Candidatus Carsonella ruddii strain BT chromosome... | (76924) | 76924                                                                          | 76934 | 76945 | 76956 | 76967 | 76978 | 76989 | 77000 |
| Candidatus Carsonella 135557 - 167442nt              | (76924) | ATTATGTCCTTTTTTAAAAGGAGGTAAAATTGGTTTATTTGGTGGTCTGGAGTTGGAAAACTGTTAATATGATGG    |       |       |       |       |       |       |       |
| SARS-CoV-2 Reference Genome NC_045512.2              | (1)     | -----                                                                          |       |       |       |       |       |       |       |
|                                                      | (1)     | -----                                                                          |       |       |       |       |       |       |       |
| Section 1001                                         |         |                                                                                |       |       |       |       |       |       |       |
| Candidatus Carsonella ruddii strain BT chromosome... | (77001) | 77001                                                                          | 77011 | 77022 | 77033 | 77044 | 77055 | 77066 | 77077 |
| Candidatus Carsonella 135557 - 167442nt              | (77001) | AATTAATAAGAAATATAGCAATAGAACATAGTGGATGCTCTGTTTTATTGGAGTAGGAGAAAGATCTCGGGAAGGA   |       |       |       |       |       |       |       |
| SARS-CoV-2 Reference Genome NC_045512.2              | (1)     | -----                                                                          |       |       |       |       |       |       |       |
|                                                      | (1)     | -----                                                                          |       |       |       |       |       |       |       |
| Section 1002                                         |         |                                                                                |       |       |       |       |       |       |       |
| Candidatus Carsonella ruddii strain BT chromosome... | (77078) | 77078                                                                          | 77088 | 77099 | 77110 | 77121 | 77132 | 77143 | 77154 |
| Candidatus Carsonella 135557 - 167442nt              | (77078) | AATGATTTTTATCATGAAATGAAAGATTCAAATGTATTAGATAAAGTTTCATTAATATATGGACAAATGAACGAACC  |       |       |       |       |       |       |       |
| SARS-CoV-2 Reference Genome NC_045512.2              | (1)     | -----                                                                          |       |       |       |       |       |       |       |
|                                                      | (1)     | -----                                                                          |       |       |       |       |       |       |       |

|                                                      |         |                                                                                |       |       |       |       |       |       |       |
|------------------------------------------------------|---------|--------------------------------------------------------------------------------|-------|-------|-------|-------|-------|-------|-------|
| Section 1003                                         |         |                                                                                |       |       |       |       |       |       |       |
| Candidatus Carsonella ruddii strain BT chromosome... | (77155) | 77155                                                                          | 77165 | 77176 | 77187 | 77198 | 77209 | 77220 | 77231 |
| Candidatus Carsonella 135557 - 167442nt              | (77155) | ATCAGGAAATAGATTAAAGAGTTGCTTTAACAGGATTAAGTATAGCTGAAGAATTTAGAAATTCTGGAAAAGATGTTT |       |       |       |       |       |       |       |
| SARS-CoV-2 Reference Genome NC_045512.2              | (1)     | -----                                                                          |       |       |       |       |       |       |       |
|                                                      | (1)     | -----                                                                          |       |       |       |       |       |       |       |
| Section 1004                                         |         |                                                                                |       |       |       |       |       |       |       |
| Candidatus Carsonella ruddii strain BT chromosome... | (77232) | 77232                                                                          | 77242 | 77253 | 77264 | 77275 | 77286 | 77297 | 77308 |
| Candidatus Carsonella 135557 - 167442nt              | (77232) | TATTATTTTATAGATAATATTTATAGATTTACTTTAGCAGGTACAGAAGTTTCAGCAATGTTAGGAAGAACTCCATCT |       |       |       |       |       |       |       |
| SARS-CoV-2 Reference Genome NC_045512.2              | (1)     | -----                                                                          |       |       |       |       |       |       |       |
|                                                      | (1)     | -----                                                                          |       |       |       |       |       |       |       |
| Section 1005                                         |         |                                                                                |       |       |       |       |       |       |       |
| Candidatus Carsonella ruddii strain BT chromosome... | (77309) | 77309                                                                          | 77319 | 77330 | 77341 | 77352 | 77363 | 77374 | 77385 |
| Candidatus Carsonella 135557 - 167442nt              | (77309) | GCTGTAGGTTATCAACCTACTCTTGCTGAAGAAATGGGAAAATTACAAGAAAGAATATCTTCAACAAAAAATGGAAG  |       |       |       |       |       |       |       |
| SARS-CoV-2 Reference Genome NC_045512.2              | (1)     | -----                                                                          |       |       |       |       |       |       |       |
|                                                      | (1)     | -----                                                                          |       |       |       |       |       |       |       |
| Section 1006                                         |         |                                                                                |       |       |       |       |       |       |       |
| Candidatus Carsonella ruddii strain BT chromosome... | (77386) | 77386                                                                          | 77396 | 77407 | 77418 | 77429 | 77440 | 77451 | 77462 |
| Candidatus Carsonella 135557 - 167442nt              | (77386) | TATAACTTCTGTTCAAGCTATATATGTTCCAGCAGATGATTTAACAGATCCATCTCCAAGTACTACTTTTTCTCATT  |       |       |       |       |       |       |       |
| SARS-CoV-2 Reference Genome NC_045512.2              | (1)     | -----                                                                          |       |       |       |       |       |       |       |
|                                                      | (1)     | -----                                                                          |       |       |       |       |       |       |       |
| Section 1007                                         |         |                                                                                |       |       |       |       |       |       |       |
| Candidatus Carsonella ruddii strain BT chromosome... | (77463) | 77463                                                                          | 77473 | 77484 | 77495 | 77506 | 77517 | 77528 | 77539 |
| Candidatus Carsonella 135557 - 167442nt              | (77463) | TAGATTCAACAATAGTTTTATCAAGACAAATAGCTGAATTAGGAATTTATCCTTCTATAGATCCTTTAGAATCTTAT  |       |       |       |       |       |       |       |
| SARS-CoV-2 Reference Genome NC_045512.2              | (1)     | -----                                                                          |       |       |       |       |       |       |       |
|                                                      | (1)     | -----                                                                          |       |       |       |       |       |       |       |
| Section 1008                                         |         |                                                                                |       |       |       |       |       |       |       |
| Candidatus Carsonella ruddii strain BT chromosome... | (77540) | 77540                                                                          | 77550 | 77561 | 77572 | 77583 | 77594 | 77605 | 77616 |
| Candidatus Carsonella 135557 - 167442nt              | (77540) | TCAAAGCAATTAGATCCTTATATAGTTGGAGAAGAACATTACGATATCGCAAACAAAGTAAATATTATTGCAAAA    |       |       |       |       |       |       |       |
| SARS-CoV-2 Reference Genome NC_045512.2              | (1)     | -----                                                                          |       |       |       |       |       |       |       |
|                                                      | (1)     | -----                                                                          |       |       |       |       |       |       |       |



|                                                      |         |                                                                                 |       |       |       |       |       |              |       |
|------------------------------------------------------|---------|---------------------------------------------------------------------------------|-------|-------|-------|-------|-------|--------------|-------|
|                                                      |         |                                                                                 |       |       |       |       |       | Section 1009 |       |
| Candidatus Carsonella ruddii strain BT chromosome... | (77617) | 77617                                                                           | 77627 | 77638 | 77649 | 77660 | 77671 | 77682        | 77693 |
| Candidatus Carsonella 135557 - 167442nt              | (77617) | ATATAAAGAATTAAAAGATACAATTGCTATTTTAGGAATAGATGAATTATCTGAATTTCGATAAAAACAATTGTATCAA |       |       |       |       |       |              |       |
| SARS-CoV-2 Reference Genome NC_045512.2              | (1)     | -----                                                                           |       |       |       |       |       |              |       |
|                                                      | (1)     | -----                                                                           |       |       |       |       |       |              |       |
|                                                      |         |                                                                                 |       |       |       |       |       | Section 1010 |       |
| Candidatus Carsonella ruddii strain BT chromosome... | (77694) | 77694                                                                           | 77704 | 77715 | 77726 | 77737 | 77748 | 77759        | 77770 |
| Candidatus Carsonella 135557 - 167442nt              | (77694) | GAGCAAGAAAATTACAAAAATTTTTTTCACAACCTTTTTTGTGGAGAAATTTTACTAATATTAAAGGTAAATAT      |       |       |       |       |       |              |       |
| SARS-CoV-2 Reference Genome NC_045512.2              | (1)     | -----                                                                           |       |       |       |       |       |              |       |
|                                                      | (1)     | -----                                                                           |       |       |       |       |       |              |       |
|                                                      |         |                                                                                 |       |       |       |       |       | Section 1011 |       |
| Candidatus Carsonella ruddii strain BT chromosome... | (77771) | 77771                                                                           | 77781 | 77792 | 77803 | 77814 | 77825 | 77836        | 77847 |
| Candidatus Carsonella 135557 - 167442nt              | (77771) | GTTAAAATAAAAAGATTCTTTAAAATGTTTTAAAAATATAATAAACGGTGTTTATGATAATTTAAACGAAAAAAATTT  |       |       |       |       |       |              |       |
| SARS-CoV-2 Reference Genome NC_045512.2              | (1)     | -----                                                                           |       |       |       |       |       |              |       |
|                                                      | (1)     | -----                                                                           |       |       |       |       |       |              |       |
|                                                      |         |                                                                                 |       |       |       |       |       | Section 1012 |       |
| Candidatus Carsonella ruddii strain BT chromosome... | (77848) | 77848                                                                           | 77858 | 77869 | 77880 | 77891 | 77902 | 77913        | 77924 |
| Candidatus Carsonella 135557 - 167442nt              | (77848) | TTATATGATTGGAAAAATATGAATGTTTTATTTATAGTTTGTATCAAATATAAATTATAATAATGTTAAAATTAT     |       |       |       |       |       |              |       |
| SARS-CoV-2 Reference Genome NC_045512.2              | (1)     | -----                                                                           |       |       |       |       |       |              |       |
|                                                      | (1)     | -----                                                                           |       |       |       |       |       |              |       |
|                                                      |         |                                                                                 |       |       |       |       |       | Section 1013 |       |
| Candidatus Carsonella ruddii strain BT chromosome... | (77925) | 77925                                                                           | 77935 | 77946 | 77957 | 77968 | 77979 | 77990        | 78001 |
| Candidatus Carsonella 135557 - 167442nt              | (77925) | AAAAATATTTGAAAATAATAATAATTCATATTCTATAATGAATAATCATATTTTCATCAATAAAAAATTTAAATGTAA  |       |       |       |       |       |              |       |
| SARS-CoV-2 Reference Genome NC_045512.2              | (1)     | -----                                                                           |       |       |       |       |       |              |       |
|                                                      | (1)     | -----                                                                           |       |       |       |       |       |              |       |
|                                                      |         |                                                                                 |       |       |       |       |       | Section 1014 |       |
| Candidatus Carsonella ruddii strain BT chromosome... | (78002) | 78002                                                                           | 78012 | 78023 | 78034 | 78045 | 78056 | 78067        | 78078 |
| Candidatus Carsonella 135557 - 167442nt              | (78002) | TTTTATTTTATTATTTTAAAAAAGTTATAAAAAATTAATTTTTTTAATGGTTTTATATTCAAAAAAAAAAAAAATATT  |       |       |       |       |       |              |       |
| SARS-CoV-2 Reference Genome NC_045512.2              | (1)     | -----                                                                           |       |       |       |       |       |              |       |
|                                                      | (1)     | -----                                                                           |       |       |       |       |       |              |       |

## SARS-CoV-2 &amp; Bakterien.apr

|                                                      |         |                                                                                 |       |       |       |       |       |       |       |
|------------------------------------------------------|---------|---------------------------------------------------------------------------------|-------|-------|-------|-------|-------|-------|-------|
| Section 1015                                         |         |                                                                                 |       |       |       |       |       |       |       |
| Candidatus Carsonella ruddii strain BT chromosome... | (78079) | 78079                                                                           | 78089 | 78100 | 78111 | 78122 | 78133 | 78144 | 78155 |
| Candidatus Carsonella 135557 - 167442nt              | (78079) | AATATAATATGTAAAAAATATGAATTTTTTATAACAAACATTTATTAAATGATTTCAATTTAAAAAATACGAAATTT   |       |       |       |       |       |       |       |
| SARS-CoV-2 Reference Genome NC_045512.2              | (1)     | -----                                                                           |       |       |       |       |       |       |       |
|                                                      | (1)     | -----                                                                           |       |       |       |       |       |       |       |
| Section 1016                                         |         |                                                                                 |       |       |       |       |       |       |       |
| Candidatus Carsonella ruddii strain BT chromosome... | (78156) | 78156                                                                           | 78166 | 78177 | 78188 | 78199 | 78210 | 78221 | 78232 |
| Candidatus Carsonella 135557 - 167442nt              | (78156) | TATCTATATTAGAAACTATAAAAAAATCTCATTGTTTATCATTTTTTAATAAAAAAATATGTATTATAAATGAAAAA   |       |       |       |       |       |       |       |
| SARS-CoV-2 Reference Genome NC_045512.2              | (1)     | -----                                                                           |       |       |       |       |       |       |       |
|                                                      | (1)     | -----                                                                           |       |       |       |       |       |       |       |
| Section 1017                                         |         |                                                                                 |       |       |       |       |       |       |       |
| Candidatus Carsonella ruddii strain BT chromosome... | (78233) | 78233                                                                           | 78243 | 78254 | 78265 | 78276 | 78287 | 78298 | 78309 |
| Candidatus Carsonella 135557 - 167442nt              | (78233) | CAATCATTAAGAACTATTAATTCACATAATAAATCTTTAAATTTTTTAAATTTAAATTTACTATAATTAATAACAA    |       |       |       |       |       |       |       |
| SARS-CoV-2 Reference Genome NC_045512.2              | (1)     | -----                                                                           |       |       |       |       |       |       |       |
|                                                      | (1)     | -----                                                                           |       |       |       |       |       |       |       |
| Section 1018                                         |         |                                                                                 |       |       |       |       |       |       |       |
| Candidatus Carsonella ruddii strain BT chromosome... | (78310) | 78310                                                                           | 78320 | 78331 | 78342 | 78353 | 78364 | 78375 | 78386 |
| Candidatus Carsonella 135557 - 167442nt              | (78310) | ACATAATATTAAAAAAGAAAATATAAAAGATTTTTCAAAAACATTAGGATTATTATATGATTATATTTTTATAAGAA   |       |       |       |       |       |       |       |
| SARS-CoV-2 Reference Genome NC_045512.2              | (1)     | -----                                                                           |       |       |       |       |       |       |       |
|                                                      | (1)     | -----                                                                           |       |       |       |       |       |       |       |
| Section 1019                                         |         |                                                                                 |       |       |       |       |       |       |       |
| Candidatus Carsonella ruddii strain BT chromosome... | (78387) | 78387                                                                           | 78397 | 78408 | 78419 | 78430 | 78441 | 78452 | 78463 |
| Candidatus Carsonella 135557 - 167442nt              | (78387) | GTAATAATGATAATATTGTTAAAATTATTTCTAAAACTCAGGTTCAATAATAATAAATATTTTAAGTAATGGTTTT    |       |       |       |       |       |       |       |
| SARS-CoV-2 Reference Genome NC_045512.2              | (1)     | -----                                                                           |       |       |       |       |       |       |       |
|                                                      | (1)     | -----                                                                           |       |       |       |       |       |       |       |
| Section 1020                                         |         |                                                                                 |       |       |       |       |       |       |       |
| Candidatus Carsonella ruddii strain BT chromosome... | (78464) | 78464                                                                           | 78474 | 78485 | 78496 | 78507 | 78518 | 78529 | 78540 |
| Candidatus Carsonella 135557 - 167442nt              | (78464) | CACCCAATACAAGCAATTGGTGATTTATATTTTTTAAAAAAAAAAAAATAATTTATTTATTTGGTGATTTTAATTCTAA |       |       |       |       |       |       |       |
| SARS-CoV-2 Reference Genome NC_045512.2              | (1)     | -----                                                                           |       |       |       |       |       |       |       |
|                                                      | (1)     | -----                                                                           |       |       |       |       |       |       |       |

## SARS-CoV-2 &amp; Bakterien.apr

|                                                      |         |                                                                                |       |       |       |       |       |              |       |
|------------------------------------------------------|---------|--------------------------------------------------------------------------------|-------|-------|-------|-------|-------|--------------|-------|
|                                                      |         |                                                                                |       |       |       |       |       | Section 1021 |       |
| Candidatus Carsonella ruddii strain BT chromosome... | (78541) | 78541                                                                          | 78551 | 78562 | 78573 | 78584 | 78595 | 78606        | 78617 |
| Candidatus Carsonella 135557 - 167442nt              | (78541) | TGTTTTTAGATCAATTATAATTAATTTATCTAAATTAAATAAAAAATATAATCATATTTTCTCCAAAAATATATTGGA |       |       |       |       |       |              |       |
| SARS-CoV-2 Reference Genome NC_045512.2              | (1)     | -----                                                                          |       |       |       |       |       |              |       |
|                                                      | (1)     | -----                                                                          |       |       |       |       |       |              |       |
|                                                      |         |                                                                                |       |       |       |       |       | Section 1022 |       |
| Candidatus Carsonella ruddii strain BT chromosome... | (78618) | 78618                                                                          | 78628 | 78639 | 78650 | 78661 | 78672 | 78683        | 78694 |
| Candidatus Carsonella 135557 - 167442nt              | (78618) | ATTTTATTTTTTTTAAAAAAATATTTAATAAAAAAAATTTATAATAACCGAAAAATTAATAATTTCTAAAAAA      |       |       |       |       |       |              |       |
| SARS-CoV-2 Reference Genome NC_045512.2              | (1)     | -----                                                                          |       |       |       |       |       |              |       |
|                                                      | (1)     | -----                                                                          |       |       |       |       |       |              |       |
|                                                      |         |                                                                                |       |       |       |       |       | Section 1023 |       |
| Candidatus Carsonella ruddii strain BT chromosome... | (78695) | 78695                                                                          | 78705 | 78716 | 78727 | 78738 | 78749 | 78760        | 78771 |
| Candidatus Carsonella 135557 - 167442nt              | (78695) | TGTATTATTTTATAATGATGTTTGGTTCCTCAATGGGTGAAAGTGATAATTTTATTAATAAAATTAATAATTAATTA  |       |       |       |       |       |              |       |
| SARS-CoV-2 Reference Genome NC_045512.2              | (1)     | -----                                                                          |       |       |       |       |       |              |       |
|                                                      | (1)     | -----                                                                          |       |       |       |       |       |              |       |
|                                                      |         |                                                                                |       |       |       |       |       | Section 1024 |       |
| Candidatus Carsonella ruddii strain BT chromosome... | (78772) | 78772                                                                          | 78782 | 78793 | 78804 | 78815 | 78826 | 78837        | 78848 |
| Candidatus Carsonella 135557 - 167442nt              | (78772) | TTTTCAAATTAATAAAAAAATTTTAAAAATTTTAAAAATTGAAAAAATTTTCACTGTCTTCCATGTTTTAAAAATA   |       |       |       |       |       |              |       |
| SARS-CoV-2 Reference Genome NC_045512.2              | (1)     | -----                                                                          |       |       |       |       |       |              |       |
|                                                      | (1)     | -----                                                                          |       |       |       |       |       |              |       |
|                                                      |         |                                                                                |       |       |       |       |       | Section 1025 |       |
| Candidatus Carsonella ruddii strain BT chromosome... | (78849) | 78849                                                                          | 78859 | 78870 | 78881 | 78892 | 78903 | 78914        | 78925 |
| Candidatus Carsonella 135557 - 167442nt              | (78849) | TTAAAAATAAAAAAACAAAATTTGAATCAGAATTAACAAAAAATGTTTTGAATCAAATTTTCTTTTTTTGAAAAA    |       |       |       |       |       |              |       |
| SARS-CoV-2 Reference Genome NC_045512.2              | (1)     | -----                                                                          |       |       |       |       |       |              |       |
|                                                      | (1)     | -----                                                                          |       |       |       |       |       |              |       |
|                                                      |         |                                                                                |       |       |       |       |       | Section 1026 |       |
| Candidatus Carsonella ruddii strain BT chromosome... | (78926) | 78926                                                                          | 78936 | 78947 | 78958 | 78969 | 78980 | 78991        | 79002 |
| Candidatus Carsonella 135557 - 167442nt              | (78926) | CAAATAATTAAAAAATATCGATTATAAAATCATATATTATATTAGGAGAAAAAACTTTTTTAAAGTTTTAAATTA    |       |       |       |       |       |              |       |
| SARS-CoV-2 Reference Genome NC_045512.2              | (1)     | -----                                                                          |       |       |       |       |       |              |       |
|                                                      | (1)     | -----                                                                          |       |       |       |       |       |              |       |

## SARS-CoV-2 &amp; Bakterien.apr

|                                                      |         |                                                                                 |       |       |       |       |       |       |       |
|------------------------------------------------------|---------|---------------------------------------------------------------------------------|-------|-------|-------|-------|-------|-------|-------|
| Section 1027                                         |         |                                                                                 |       |       |       |       |       |       |       |
| Candidatus Carsonella ruddii strain BT chromosome... | (79003) | 79003                                                                           | 79013 | 79024 | 79035 | 79046 | 79057 | 79068 | 79079 |
| Candidatus Carsonella 135557 - 167442nt              | (79003) | AAAATTATTTAATATTTTTACAAATTTTATTTTGGAAATTTGATTTATAAAATCAAATATATTTTTTTTTTTAATA    |       |       |       |       |       |       |       |
| SARS-CoV-2 Reference Genome NC_045512.2              | (1)     | -----                                                                           |       |       |       |       |       |       |       |
|                                                      | (1)     | -----                                                                           |       |       |       |       |       |       |       |
| Section 1028                                         |         |                                                                                 |       |       |       |       |       |       |       |
| Candidatus Carsonella ruddii strain BT chromosome... | (79080) | 79080                                                                           | 79090 | 79101 | 79112 | 79123 | 79134 | 79145 | 79156 |
| Candidatus Carsonella 135557 - 167442nt              | (79080) | AATAAATATTTTAATAACATAAAATCATAAATATAATTAATAGCATTATAATAACCATTATATTTTCATACCTGAAATT |       |       |       |       |       |       |       |
| SARS-CoV-2 Reference Genome NC_045512.2              | (1)     | -----                                                                           |       |       |       |       |       |       |       |
|                                                      | (1)     | -----                                                                           |       |       |       |       |       |       |       |
| Section 1029                                         |         |                                                                                 |       |       |       |       |       |       |       |
| Candidatus Carsonella ruddii strain BT chromosome... | (79157) | 79157                                                                           | 79167 | 79178 | 79189 | 79200 | 79211 | 79222 | 79233 |
| Candidatus Carsonella 135557 - 167442nt              | (79157) | ATAATATTTGAATTAAGAGATATTAAAGATTTATTTCTAAAAATATTCTCTTTTATATAAAATTTGTAATATGAACTTC |       |       |       |       |       |       |       |
| SARS-CoV-2 Reference Genome NC_045512.2              | (1)     | -----                                                                           |       |       |       |       |       |       |       |
|                                                      | (1)     | -----                                                                           |       |       |       |       |       |       |       |
| Section 1030                                         |         |                                                                                 |       |       |       |       |       |       |       |
| Candidatus Carsonella ruddii strain BT chromosome... | (79234) | 79234                                                                           | 79244 | 79255 | 79266 | 79277 | 79288 | 79299 | 79310 |
| Candidatus Carsonella 135557 - 167442nt              | (79234) | TATAATTGTTCTTTTAAATATTTTTTAAACAATCTAATATTGATAGAGAATAATGACTAAACGATGCAGGATTAATTA  |       |       |       |       |       |       |       |
| SARS-CoV-2 Reference Genome NC_045512.2              | (1)     | -----                                                                           |       |       |       |       |       |       |       |
|                                                      | (1)     | -----                                                                           |       |       |       |       |       |       |       |
| Section 1031                                         |         |                                                                                 |       |       |       |       |       |       |       |
| Candidatus Carsonella ruddii strain BT chromosome... | (79311) | 79311                                                                           | 79321 | 79332 | 79343 | 79354 | 79365 | 79376 | 79387 |
| Candidatus Carsonella 135557 - 167442nt              | (79311) | TCAACCAATCTATTTTGTAATTTTTTGTAAAAAATTTACAATTTTCTTCACAATTTGAATTAAAAAATATCAAT      |       |       |       |       |       |       |       |
| SARS-CoV-2 Reference Genome NC_045512.2              | (1)     | -----                                                                           |       |       |       |       |       |       |       |
|                                                      | (1)     | -----                                                                           |       |       |       |       |       |       |       |
| Section 1032                                         |         |                                                                                 |       |       |       |       |       |       |       |
| Candidatus Carsonella ruddii strain BT chromosome... | (79388) | 79388                                                                           | 79398 | 79409 | 79420 | 79431 | 79442 | 79453 | 79464 |
| Candidatus Carsonella 135557 - 167442nt              | (79388) | TTAAAATATTTTTTAGAATAATTTAATAATTCTTTTTTTAATTTTTTAAAAGAAATATTAGAATAAATTTCTCTCT    |       |       |       |       |       |       |       |
| SARS-CoV-2 Reference Genome NC_045512.2              | (1)     | -----                                                                           |       |       |       |       |       |       |       |
|                                                      | (1)     | -----                                                                           |       |       |       |       |       |       |       |

## SARS-CoV-2 &amp; Bakterien.apr

|                                                      |         |                                                                                 |       |       |       |       |       |       |       |
|------------------------------------------------------|---------|---------------------------------------------------------------------------------|-------|-------|-------|-------|-------|-------|-------|
| Section 1033                                         |         |                                                                                 |       |       |       |       |       |       |       |
| Candidatus Carsonella ruddii strain BT chromosome... | (79465) | 79465                                                                           | 79475 | 79486 | 79497 | 79508 | 79519 | 79530 | 79541 |
| Candidatus Carsonella 135557 - 167442nt              | (79465) | TTTTTGTAAGAAATTTAAATTTGGTCCATTAACAATTAAAATTTTACAATTTTATTATATATAAACATAATTTTAT    |       |       |       |       |       |       |       |
| SARS-CoV-2 Reference Genome NC_045512.2              | (1)     | -----                                                                           |       |       |       |       |       |       |       |
| Section 1034                                         |         |                                                                                 |       |       |       |       |       |       |       |
| Candidatus Carsonella ruddii strain BT chromosome... | (79542) | 79542                                                                           | 79552 | 79563 | 79574 | 79585 | 79596 | 79607 | 79618 |
| Candidatus Carsonella 135557 - 167442nt              | (79542) | TAAATTTTTTTTTGTAAAATTAAAATATTTTTTAAATCTTTTTCTGATGATGATTTACCATATTTATTAATATTAA    |       |       |       |       |       |       |       |
| SARS-CoV-2 Reference Genome NC_045512.2              | (1)     | -----                                                                           |       |       |       |       |       |       |       |
| Section 1035                                         |         |                                                                                 |       |       |       |       |       |       |       |
| Candidatus Carsonella ruddii strain BT chromosome... | (79619) | 79619                                                                           | 79629 | 79640 | 79651 | 79662 | 79673 | 79684 | 79695 |
| Candidatus Carsonella 135557 - 167442nt              | (79619) | AAATAAATAAATAATTAATATTATATTTATTTAATAAAATATCATTAGAAGATTCAAAAATAATGTTTTTTTATTA    |       |       |       |       |       |       |       |
| SARS-CoV-2 Reference Genome NC_045512.2              | (1)     | -----                                                                           |       |       |       |       |       |       |       |
| Section 1036                                         |         |                                                                                 |       |       |       |       |       |       |       |
| Candidatus Carsonella ruddii strain BT chromosome... | (79696) | 79696                                                                           | 79706 | 79717 | 79728 | 79739 | 79750 | 79761 | 79772 |
| Candidatus Carsonella 135557 - 167442nt              | (79696) | AATATATTGTTTTTATAATTTTTATTTTGTTTATTAAATAAAAAATATACAATATAAAGAAATTATTTTTATATTAAA  |       |       |       |       |       |       |       |
| SARS-CoV-2 Reference Genome NC_045512.2              | (1)     | -----                                                                           |       |       |       |       |       |       |       |
| Section 1037                                         |         |                                                                                 |       |       |       |       |       |       |       |
| Candidatus Carsonella ruddii strain BT chromosome... | (79773) | 79773                                                                           | 79783 | 79794 | 79805 | 79816 | 79827 | 79838 | 79849 |
| Candidatus Carsonella 135557 - 167442nt              | (79773) | ATATTTTTTTTAAAAAAAAAATAACATTCAAATATACATTCTAAATCAGAACCTGAAGATACTATTGTTAAATCACATT |       |       |       |       |       |       |       |
| SARS-CoV-2 Reference Genome NC_045512.2              | (1)     | -----                                                                           |       |       |       |       |       |       |       |
| Section 1038                                         |         |                                                                                 |       |       |       |       |       |       |       |
| Candidatus Carsonella ruddii strain BT chromosome... | (79850) | 79850                                                                           | 79860 | 79871 | 79882 | 79893 | 79904 | 79915 | 79926 |
| Candidatus Carsonella 135557 - 167442nt              | (79850) | TTTTTTTAATTGAATTTATCAAATATCCTCCTTTAATAATTTTATTTATATTTATAAATTTTAAATTATTATTCTTA   |       |       |       |       |       |       |       |
| SARS-CoV-2 Reference Genome NC_045512.2              | (1)     | -----                                                                           |       |       |       |       |       |       |       |

## SARS-CoV-2 &amp; Bakterien.apr

|                                                      |         |                                                                                |       |       |       |       |       |       |       |
|------------------------------------------------------|---------|--------------------------------------------------------------------------------|-------|-------|-------|-------|-------|-------|-------|
|                                                      |         | Section 1039                                                                   |       |       |       |       |       |       |       |
| Candidatus Carsonella ruddii strain BT chromosome... | (79927) | 79927                                                                          | 79937 | 79948 | 79959 | 79970 | 79981 | 79992 | 80003 |
|                                                      | (79927) | AAATTTTGTCTTGATAATATTAATGAAGAAGAATTTTTTCTAATTTTATAATTATATACCAAGAAACAATTAATTC   |       |       |       |       |       |       |       |
|                                                      | (1)     | -----                                                                          |       |       |       |       |       |       |       |
| Candidatus Carsonella 135557 - 167442nt              | (1)     | -----                                                                          |       |       |       |       |       |       |       |
| SARS-CoV-2 Reference Genome NC_045512.2              | (1)     | -----                                                                          |       |       |       |       |       |       |       |
|                                                      |         | Section 1040                                                                   |       |       |       |       |       |       |       |
| Candidatus Carsonella ruddii strain BT chromosome... | (80004) | 80004                                                                          | 80014 | 80025 | 80036 | 80047 | 80058 | 80069 | 80080 |
|                                                      | (80004) | AATTAAATTATAAGGTCTAAAAACAAAAATCTAGGAAAAGACCTTAAATTTTTTAATTGTTCAATAGGTTGATGTG   |       |       |       |       |       |       |       |
|                                                      | (1)     | -----                                                                          |       |       |       |       |       |       |       |
| Candidatus Carsonella 135557 - 167442nt              | (1)     | -----                                                                          |       |       |       |       |       |       |       |
| SARS-CoV-2 Reference Genome NC_045512.2              | (1)     | -----                                                                          |       |       |       |       |       |       |       |
|                                                      |         | Section 1041                                                                   |       |       |       |       |       |       |       |
| Candidatus Carsonella ruddii strain BT chromosome... | (80081) | 80081                                                                          | 80091 | 80102 | 80113 | 80124 | 80135 | 80146 | 80157 |
|                                                      | (80081) | TTGGACCATCTTCACCAACATAAAATGAATCATGTGTAAAAATAAAAAATTTTTTAATTTAGAAATATTAAATTT    |       |       |       |       |       |       |       |
|                                                      | (1)     | -----                                                                          |       |       |       |       |       |       |       |
| Candidatus Carsonella 135557 - 167442nt              | (1)     | -----                                                                          |       |       |       |       |       |       |       |
| SARS-CoV-2 Reference Genome NC_045512.2              | (1)     | -----                                                                          |       |       |       |       |       |       |       |
|                                                      |         | Section 1042                                                                   |       |       |       |       |       |       |       |
| Candidatus Carsonella ruddii strain BT chromosome... | (80158) | 80158                                                                          | 80168 | 80179 | 80190 | 80201 | 80212 | 80223 | 80234 |
|                                                      | (80158) | CTTATAGCGCTATACATATAATTAGAAAAAACTAAAAAAGTAGAACAAAAATGTGATCATATTTTTTTCGGAACAAAT |       |       |       |       |       |       |       |
|                                                      | (1)     | -----                                                                          |       |       |       |       |       |       |       |
| Candidatus Carsonella 135557 - 167442nt              | (1)     | -----                                                                          |       |       |       |       |       |       |       |
| SARS-CoV-2 Reference Genome NC_045512.2              | (1)     | -----                                                                          |       |       |       |       |       |       |       |
|                                                      |         | Section 1043                                                                   |       |       |       |       |       |       |       |
| Candidatus Carsonella ruddii strain BT chromosome... | (80235) | 80235                                                                          | 80245 | 80256 | 80267 | 80278 | 80289 | 80300 | 80311 |
|                                                      | (80235) | TCCATAATTAATAAGAGACATACAAAATTCTCTTACTCCATAATTTAAAAATCTATTATTAAATTTTTTTTTTGAAA  |       |       |       |       |       |       |       |
|                                                      | (1)     | -----                                                                          |       |       |       |       |       |       |       |
| Candidatus Carsonella 135557 - 167442nt              | (1)     | -----                                                                          |       |       |       |       |       |       |       |
| SARS-CoV-2 Reference Genome NC_045512.2              | (1)     | -----                                                                          |       |       |       |       |       |       |       |
|                                                      |         | Section 1044                                                                   |       |       |       |       |       |       |       |
| Candidatus Carsonella ruddii strain BT chromosome... | (80312) | 80312                                                                          | 80322 | 80333 | 80344 | 80355 | 80366 | 80377 | 80388 |
|                                                      | (80312) | TTGAATTAATTTTTTTTCCTTTTGTTAAATTTGATGAAGTTAAATCAGCACTTCCACCTAAAAATTCATTTAATTGA  |       |       |       |       |       |       |       |
|                                                      | (1)     | -----                                                                          |       |       |       |       |       |       |       |
| Candidatus Carsonella 135557 - 167442nt              | (1)     | -----                                                                          |       |       |       |       |       |       |       |
| SARS-CoV-2 Reference Genome NC_045512.2              | (1)     | -----                                                                          |       |       |       |       |       |       |       |

## SARS-CoV-2 &amp; Bakterien.apr

|                                                                                                                                            |         |                                                                                    |       |       |       |       |       |       |       |
|--------------------------------------------------------------------------------------------------------------------------------------------|---------|------------------------------------------------------------------------------------|-------|-------|-------|-------|-------|-------|-------|
| Section 1045                                                                                                                               |         |                                                                                    |       |       |       |       |       |       |       |
| Candidatus Carsonella ruddii strain BT chromosome...<br>Candidatus Carsonella 135557 - 167442nt<br>SARS-CoV-2 Reference Genome NC_045512.2 | (80389) | 80389                                                                              | 80399 | 80410 | 80421 | 80432 | 80443 | 80454 | 80465 |
|                                                                                                                                            | (80389) | GATAAATCGTTAATTATAAGATTTGAAATAAATCTTGTAGATTTATTTAAAAATTTTTTTTCATTTTTTAAATAAAG      |       |       |       |       |       |       |       |
|                                                                                                                                            | (1)     | -----                                                                              |       |       |       |       |       |       |       |
|                                                                                                                                            | (1)     | -----                                                                              |       |       |       |       |       |       |       |
| Section 1046                                                                                                                               |         |                                                                                    |       |       |       |       |       |       |       |
| Candidatus Carsonella ruddii strain BT chromosome...<br>Candidatus Carsonella 135557 - 167442nt<br>SARS-CoV-2 Reference Genome NC_045512.2 | (80466) | 80466                                                                              | 80476 | 80487 | 80498 | 80509 | 80520 | 80531 | 80542 |
|                                                                                                                                            | (80466) | CTTAATTAAATTTATTTTAATTATTATATTATTTAAAAATCTTATTAATTCTAAAAATGAAAAATAATAATTTTTTAA     |       |       |       |       |       |       |       |
|                                                                                                                                            | (1)     | -----                                                                              |       |       |       |       |       |       |       |
|                                                                                                                                            | (1)     | -----                                                                              |       |       |       |       |       |       |       |
| Section 1047                                                                                                                               |         |                                                                                    |       |       |       |       |       |       |       |
| Candidatus Carsonella ruddii strain BT chromosome...<br>Candidatus Carsonella 135557 - 167442nt<br>SARS-CoV-2 Reference Genome NC_045512.2 | (80543) | 80543                                                                              | 80553 | 80564 | 80575 | 80586 | 80597 | 80608 | 80619 |
|                                                                                                                                            | (80543) | TATAATATAATATATATATTTTTTTTTTAATATCAAATAATTTTTTTTTTAATATATAAATATTTAATAGTATAATTTTTTA |       |       |       |       |       |       |       |
|                                                                                                                                            | (1)     | -----                                                                              |       |       |       |       |       |       |       |
|                                                                                                                                            | (1)     | -----                                                                              |       |       |       |       |       |       |       |
| Section 1048                                                                                                                               |         |                                                                                    |       |       |       |       |       |       |       |
| Candidatus Carsonella ruddii strain BT chromosome...<br>Candidatus Carsonella 135557 - 167442nt<br>SARS-CoV-2 Reference Genome NC_045512.2 | (80620) | 80620                                                                              | 80630 | 80641 | 80652 | 80663 | 80674 | 80685 | 80696 |
|                                                                                                                                            | (80620) | TAAATATTAATTATTTGTTTTTTATTAAATATTGTTCCATGAACAGATTTCAGAATATGATTTATCAGATGACAAAAA     |       |       |       |       |       |       |       |
|                                                                                                                                            | (1)     | -----                                                                              |       |       |       |       |       |       |       |
|                                                                                                                                            | (1)     | -----                                                                              |       |       |       |       |       |       |       |
| Section 1049                                                                                                                               |         |                                                                                    |       |       |       |       |       |       |       |
| Candidatus Carsonella ruddii strain BT chromosome...<br>Candidatus Carsonella 135557 - 167442nt<br>SARS-CoV-2 Reference Genome NC_045512.2 | (80697) | 80697                                                                              | 80707 | 80718 | 80729 | 80740 | 80751 | 80762 | 80773 |
|                                                                                                                                            | (80697) | ACCAATTATTGTTTTAAAAATAAATTAATAATAGGAAAAATAACTTAAAAATAGATTTTTTAATAGATTTTTTAATTAATT  |       |       |       |       |       |       |       |
|                                                                                                                                            | (1)     | -----                                                                              |       |       |       |       |       |       |       |
|                                                                                                                                            | (1)     | -----                                                                              |       |       |       |       |       |       |       |
| Section 1050                                                                                                                               |         |                                                                                    |       |       |       |       |       |       |       |
| Candidatus Carsonella ruddii strain BT chromosome...<br>Candidatus Carsonella 135557 - 167442nt<br>SARS-CoV-2 Reference Genome NC_045512.2 | (80774) | 80774                                                                              | 80784 | 80795 | 80806 | 80817 | 80828 | 80839 | 80850 |
|                                                                                                                                            | (80774) | TATAATCATGTCCGTTTATTGGACCTATTACATCCCAATTCATAGAATTAAATTTTTGTTTAATTTTTCAAAAAA        |       |       |       |       |       |       |       |
|                                                                                                                                            | (1)     | -----                                                                              |       |       |       |       |       |       |       |
|                                                                                                                                            | (1)     | -----                                                                              |       |       |       |       |       |       |       |

## SARS-CoV-2 &amp; Bakterien.apr

|                                                      |         |                                                                                 |       |       |       |       |       |       |              |
|------------------------------------------------------|---------|---------------------------------------------------------------------------------|-------|-------|-------|-------|-------|-------|--------------|
|                                                      |         |                                                                                 |       |       |       |       |       |       | Section 1051 |
| Candidatus Carsonella ruddii strain BT chromosome... | (80851) | 80851                                                                           | 80861 | 80872 | 80883 | 80894 | 80905 | 80916 | 80927        |
|                                                      | (80851) | TAATTTTTTACTATTCCATCAATTGATATGTTATTACTATCATAAATTAATATAATATTGTTAACATTTAAAGATCC   |       |       |       |       |       |       |              |
|                                                      | (1)     | -----                                                                           |       |       |       |       |       |       |              |
|                                                      | (1)     | -----                                                                           |       |       |       |       |       |       |              |
| Candidatus Carsonella 135557 - 167442nt              | (1)     |                                                                                 |       |       |       |       |       |       |              |
| SARS-CoV-2 Reference Genome NC_045512.2              | (1)     |                                                                                 |       |       |       |       |       |       |              |
|                                                      |         |                                                                                 |       |       |       |       |       |       | Section 1052 |
| Candidatus Carsonella ruddii strain BT chromosome... | (80928) | 80928                                                                           | 80938 | 80949 | 80960 | 80971 | 80982 | 80993 | 81004        |
|                                                      | (80928) | ACAAAATGAAATTGATTTCGTTTCCAACCTCCTTCCATTAAACATCCATCTCCACAAAATATCCAAATTTTATTATTAA |       |       |       |       |       |       |              |
|                                                      | (1)     | -----                                                                           |       |       |       |       |       |       |              |
|                                                      | (1)     | -----                                                                           |       |       |       |       |       |       |              |
| Candidatus Carsonella 135557 - 167442nt              | (1)     |                                                                                 |       |       |       |       |       |       |              |
| SARS-CoV-2 Reference Genome NC_045512.2              | (1)     |                                                                                 |       |       |       |       |       |       |              |
|                                                      |         |                                                                                 |       |       |       |       |       |       | Section 1053 |
| Candidatus Carsonella ruddii strain BT chromosome... | (81005) | 81005                                                                           | 81015 | 81026 | 81037 | 81048 | 81059 | 81070 | 81081        |
|                                                      | (81005) | AAATATTAATTTTTTTATTAAATTTATTTTAAAAATTTTATTTTAAATACCATTTCTATTCTATTCTATTCTATTCT   |       |       |       |       |       |       |              |
|                                                      | (1)     | -----                                                                           |       |       |       |       |       |       |              |
|                                                      | (1)     | -----                                                                           |       |       |       |       |       |       |              |
| Candidatus Carsonella 135557 - 167442nt              | (1)     |                                                                                 |       |       |       |       |       |       |              |
| SARS-CoV-2 Reference Genome NC_045512.2              | (1)     |                                                                                 |       |       |       |       |       |       |              |
|                                                      |         |                                                                                 |       |       |       |       |       |       | Section 1054 |
| Candidatus Carsonella ruddii strain BT chromosome... | (81082) | 81082                                                                           | 81092 | 81103 | 81114 | 81125 | 81136 | 81147 | 81158        |
|                                                      | (81082) | TGACCTAATGGTCCAGTAGATGCATCTATAAAATTTGATAATTCTGGATGAGCTGGTGTTAAAGAATTAAATTTTCT   |       |       |       |       |       |       |              |
|                                                      | (1)     | -----                                                                           |       |       |       |       |       |       |              |
|                                                      | (1)     | -----                                                                           |       |       |       |       |       |       |              |
| Candidatus Carsonella 135557 - 167442nt              | (1)     |                                                                                 |       |       |       |       |       |       |              |
| SARS-CoV-2 Reference Genome NC_045512.2              | (1)     |                                                                                 |       |       |       |       |       |       |              |
|                                                      |         |                                                                                 |       |       |       |       |       |       | Section 1055 |
| Candidatus Carsonella ruddii strain BT chromosome... | (81159) | 81159                                                                           | 81169 | 81180 | 81191 | 81202 | 81213 | 81224 | 81235        |
|                                                      | (81159) | TAATTTTTTTTAAATCTATAATTTTAAATATTTTGTATAAATATAACATAACGTAATTTATAATTACTCCATGACCAT  |       |       |       |       |       |       |              |
|                                                      | (1)     | -----                                                                           |       |       |       |       |       |       |              |
|                                                      | (1)     | -----                                                                           |       |       |       |       |       |       |              |
| Candidatus Carsonella 135557 - 167442nt              | (1)     |                                                                                 |       |       |       |       |       |       |              |
| SARS-CoV-2 Reference Genome NC_045512.2              | (1)     |                                                                                 |       |       |       |       |       |       |              |
|                                                      |         |                                                                                 |       |       |       |       |       |       | Section 1056 |
| Candidatus Carsonella ruddii strain BT chromosome... | (81236) | 81236                                                                           | 81246 | 81257 | 81268 | 81279 | 81290 | 81301 | 81312        |
|                                                      | (81236) | TAGATATTATTATTTTATCTTTATTTATATTTTAAATATTTTAAAAATTTATTTTATAAAAAAATACCATAAAAAA    |       |       |       |       |       |       |              |
|                                                      | (1)     | -----                                                                           |       |       |       |       |       |       |              |
|                                                      | (1)     | -----                                                                           |       |       |       |       |       |       |              |
| Candidatus Carsonella 135557 - 167442nt              | (1)     |                                                                                 |       |       |       |       |       |       |              |
| SARS-CoV-2 Reference Genome NC_045512.2              | (1)     |                                                                                 |       |       |       |       |       |       |              |



## SARS-CoV-2 &amp; Bakterien.apr

|                                                      |         |                                                                                  |       |       |       |       |       |       |       |
|------------------------------------------------------|---------|----------------------------------------------------------------------------------|-------|-------|-------|-------|-------|-------|-------|
|                                                      |         | Section 1057                                                                     |       |       |       |       |       |       |       |
| Candidatus Carsonella ruddii strain BT chromosome... | (81313) | 81313                                                                            | 81323 | 81334 | 81345 | 81356 | 81367 | 81378 | 81389 |
|                                                      | (81313) | GTAAATATATCTGTTATACCTAAAGGCATACCAGGATGACCTGATTTTGATTTTGTATTGATTTAATACATATAAG     |       |       |       |       |       |       |       |
|                                                      | (1)     | -----                                                                            |       |       |       |       |       |       |       |
| Candidatus Carsonella 135557 - 167442nt              | (1)     | -----                                                                            |       |       |       |       |       |       |       |
| SARS-CoV-2 Reference Genome NC_045512.2              | (1)     | -----                                                                            |       |       |       |       |       |       |       |
|                                                      |         | Section 1058                                                                     |       |       |       |       |       |       |       |
| Candidatus Carsonella ruddii strain BT chromosome... | (81390) | 81390                                                                            | 81400 | 81411 | 81422 | 81433 | 81444 | 81455 | 81466 |
|                                                      | (81390) | TCTAATATTATTTATTATATTGTATAACATGTTAAAGATAAAAAATATTATTGTTAAAAATTTATTCTTTTAGTAATT   |       |       |       |       |       |       |       |
|                                                      | (1)     | -----                                                                            |       |       |       |       |       |       |       |
| Candidatus Carsonella 135557 - 167442nt              | (1)     | -----                                                                            |       |       |       |       |       |       |       |
| SARS-CoV-2 Reference Genome NC_045512.2              | (1)     | -----                                                                            |       |       |       |       |       |       |       |
|                                                      |         | Section 1059                                                                     |       |       |       |       |       |       |       |
| Candidatus Carsonella ruddii strain BT chromosome... | (81467) | 81467                                                                            | 81477 | 81488 | 81499 | 81510 | 81521 | 81532 | 81543 |
|                                                      | (81467) | ATAAAACAAATATTTTTTTTTTTTTTAAAAAATAAAAAAAAAATTTTTTATAAAAAATAAATTATATAAATTTTATT    |       |       |       |       |       |       |       |
|                                                      | (1)     | -----                                                                            |       |       |       |       |       |       |       |
| Candidatus Carsonella 135557 - 167442nt              | (1)     | -----                                                                            |       |       |       |       |       |       |       |
| SARS-CoV-2 Reference Genome NC_045512.2              | (1)     | -----                                                                            |       |       |       |       |       |       |       |
|                                                      |         | Section 1060                                                                     |       |       |       |       |       |       |       |
| Candidatus Carsonella ruddii strain BT chromosome... | (81544) | 81544                                                                            | 81554 | 81565 | 81576 | 81587 | 81598 | 81609 | 81620 |
|                                                      | (81544) | ATTAATAATTTAAATTTTTATAATAAGAAGAAAATGAGTTTTTTATTATATTTATTTATTTGTGAAATAATTTCTAA    |       |       |       |       |       |       |       |
|                                                      | (1)     | -----                                                                            |       |       |       |       |       |       |       |
| Candidatus Carsonella 135557 - 167442nt              | (1)     | -----                                                                            |       |       |       |       |       |       |       |
| SARS-CoV-2 Reference Genome NC_045512.2              | (1)     | -----                                                                            |       |       |       |       |       |       |       |
|                                                      |         | Section 1061                                                                     |       |       |       |       |       |       |       |
| Candidatus Carsonella ruddii strain BT chromosome... | (81621) | 81621                                                                            | 81631 | 81642 | 81653 | 81664 | 81675 | 81686 | 81697 |
|                                                      | (81621) | TTTAAATATTAATAAAAAATAATTATTTTTTTATTTAATAAAAAAAAAATTTTTTTTAAAAGAAATAAAAAATAATTACT |       |       |       |       |       |       |       |
|                                                      | (1)     | -----                                                                            |       |       |       |       |       |       |       |
| Candidatus Carsonella 135557 - 167442nt              | (1)     | -----                                                                            |       |       |       |       |       |       |       |
| SARS-CoV-2 Reference Genome NC_045512.2              | (1)     | -----                                                                            |       |       |       |       |       |       |       |
|                                                      |         | Section 1062                                                                     |       |       |       |       |       |       |       |
| Candidatus Carsonella ruddii strain BT chromosome... | (81698) | 81698                                                                            | 81708 | 81719 | 81730 | 81741 | 81752 | 81763 | 81774 |
|                                                      | (81698) | CATTATTTGAAATTTTGTTTTTTTTTATTTTAACTAAAAATTAATAAAAAATATTTAATTTAAAAAATAAAAAAATT    |       |       |       |       |       |       |       |
|                                                      | (1)     | -----                                                                            |       |       |       |       |       |       |       |
| Candidatus Carsonella 135557 - 167442nt              | (1)     | -----                                                                            |       |       |       |       |       |       |       |
| SARS-CoV-2 Reference Genome NC_045512.2              | (1)     | -----                                                                            |       |       |       |       |       |       |       |

## SARS-CoV-2 &amp; Bakterien.apr

|                                                      |         |                                                                                  |       |       |       |       |       |       |       |
|------------------------------------------------------|---------|----------------------------------------------------------------------------------|-------|-------|-------|-------|-------|-------|-------|
|                                                      |         | Section 1063                                                                     |       |       |       |       |       |       |       |
| Candidatus Carsonella ruddii strain BT chromosome... | (81775) | 81775                                                                            | 81785 | 81796 | 81807 | 81818 | 81829 | 81840 | 81851 |
|                                                      | (81775) | TTTACAAATGTATTAGTAAAAATAAAAAATGAAGTTTATGAAAGTTTAAAAAGAAAGATATATTTCTACTTTTTTATA   |       |       |       |       |       |       |       |
|                                                      | (1)     | -----                                                                            |       |       |       |       |       |       |       |
| Candidatus Carsonella 135557 - 167442nt              | (1)     | -----                                                                            |       |       |       |       |       |       |       |
| SARS-CoV-2 Reference Genome NC_045512.2              | (1)     | -----                                                                            |       |       |       |       |       |       |       |
|                                                      |         | Section 1064                                                                     |       |       |       |       |       |       |       |
| Candidatus Carsonella ruddii strain BT chromosome... | (81852) | 81852                                                                            | 81862 | 81873 | 81884 | 81895 | 81906 | 81917 | 81928 |
|                                                      | (81852) | TATATTTATAAATGAACAAATTAAAAATAAAAAATATTTTAAAAATTGTATTTAAATTATATAGATTACAACCTTTTTTT |       |       |       |       |       |       |       |
|                                                      | (1)     | -----                                                                            |       |       |       |       |       |       |       |
| Candidatus Carsonella 135557 - 167442nt              | (1)     | -----                                                                            |       |       |       |       |       |       |       |
| SARS-CoV-2 Reference Genome NC_045512.2              | (1)     | -----                                                                            |       |       |       |       |       |       |       |
|                                                      |         | Section 1065                                                                     |       |       |       |       |       |       |       |
| Candidatus Carsonella ruddii strain BT chromosome... | (81929) | 81929                                                                            | 81939 | 81950 | 81961 | 81972 | 81983 | 81994 | 82005 |
|                                                      | (81929) | ATTTTTTAAAAAATATTAAAAAAGTTTGTTTATTAATTTTTTCTAATAAAGAAGAATTTAGTAAAAAATTATATATT    |       |       |       |       |       |       |       |
|                                                      | (1)     | -----                                                                            |       |       |       |       |       |       |       |
| Candidatus Carsonella 135557 - 167442nt              | (1)     | -----                                                                            |       |       |       |       |       |       |       |
| SARS-CoV-2 Reference Genome NC_045512.2              | (1)     | -----                                                                            |       |       |       |       |       |       |       |
|                                                      |         | Section 1066                                                                     |       |       |       |       |       |       |       |
| Candidatus Carsonella ruddii strain BT chromosome... | (82006) | 82006                                                                            | 82016 | 82027 | 82038 | 82049 | 82060 | 82071 | 82082 |
|                                                      | (82006) | GGTATGTTAAAAAATAATAATAATAATTTAAATTATTATTTAATTTTTTTAATTAATAATTTAATAAAAAAATAT      |       |       |       |       |       |       |       |
|                                                      | (1)     | -----                                                                            |       |       |       |       |       |       |       |
| Candidatus Carsonella 135557 - 167442nt              | (1)     | -----                                                                            |       |       |       |       |       |       |       |
| SARS-CoV-2 Reference Genome NC_045512.2              | (1)     | -----                                                                            |       |       |       |       |       |       |       |
|                                                      |         | Section 1067                                                                     |       |       |       |       |       |       |       |
| Candidatus Carsonella ruddii strain BT chromosome... | (82083) | 82083                                                                            | 82093 | 82104 | 82115 | 82126 | 82137 | 82148 | 82159 |
|                                                      | (82083) | ATATAAAATTAGTATTTTCATTTGAAATTTATAATTTTGATATATTAAAAATAATTAAAAATATAAAAAATTTAAAA    |       |       |       |       |       |       |       |
|                                                      | (1)     | -----                                                                            |       |       |       |       |       |       |       |
| Candidatus Carsonella 135557 - 167442nt              | (1)     | -----                                                                            |       |       |       |       |       |       |       |
| SARS-CoV-2 Reference Genome NC_045512.2              | (1)     | -----                                                                            |       |       |       |       |       |       |       |
|                                                      |         | Section 1068                                                                     |       |       |       |       |       |       |       |
| Candidatus Carsonella ruddii strain BT chromosome... | (82160) | 82160                                                                            | 82170 | 82181 | 82192 | 82203 | 82214 | 82225 | 82236 |
|                                                      | (82160) | AATTAAAAATTAATATAATAATAGGAATACCAGATTTATTTATTGAATATATTATCAAAAAAAAAAATTGGTATTTA    |       |       |       |       |       |       |       |
|                                                      | (1)     | -----                                                                            |       |       |       |       |       |       |       |
| Candidatus Carsonella 135557 - 167442nt              | (1)     | -----                                                                            |       |       |       |       |       |       |       |
| SARS-CoV-2 Reference Genome NC_045512.2              | (1)     | -----                                                                            |       |       |       |       |       |       |       |

|                                                      |         |                                                                                 |       |       |       |       |       |       |       |
|------------------------------------------------------|---------|---------------------------------------------------------------------------------|-------|-------|-------|-------|-------|-------|-------|
| Section 1069                                         |         |                                                                                 |       |       |       |       |       |       |       |
| Candidatus Carsonella ruddii strain BT chromosome... | (82237) | 82237                                                                           | 82247 | 82258 | 82269 | 82280 | 82291 | 82302 | 82313 |
| Candidatus Carsonella 135557 - 167442nt              | (82237) | ATAGATTCTAATTGTATTAAAAAAATTATGAATATTATTTACAAAGTTATTATGATGAATATATAGGATATGGAAC    |       |       |       |       |       |       |       |
| SARS-CoV-2 Reference Genome NC_045512.2              | (1)     | -----                                                                           |       |       |       |       |       |       |       |
|                                                      | (1)     | -----                                                                           |       |       |       |       |       |       |       |
| Section 1070                                         |         |                                                                                 |       |       |       |       |       |       |       |
| Candidatus Carsonella ruddii strain BT chromosome... | (82314) | 82314                                                                           | 82324 | 82335 | 82346 | 82357 | 82368 | 82379 | 82390 |
| Candidatus Carsonella 135557 - 167442nt              | (82314) | ATTAAGAGAAAAATATAAAAAATATTTTAAAAAATAAAAAATATTTTAAAAATATCTATAAATTCAAAAAAATTATTTT |       |       |       |       |       |       |       |
| SARS-CoV-2 Reference Genome NC_045512.2              | (1)     | -----                                                                           |       |       |       |       |       |       |       |
|                                                      | (1)     | -----                                                                           |       |       |       |       |       |       |       |
| Section 1071                                         |         |                                                                                 |       |       |       |       |       |       |       |
| Candidatus Carsonella ruddii strain BT chromosome... | (82391) | 82391                                                                           | 82401 | 82412 | 82423 | 82434 | 82445 | 82456 | 82467 |
| Candidatus Carsonella 135557 - 167442nt              | (82391) | TAAATATTTTAAAAAATAAAAAATAAAAAATTATTTATTCAGATAAAAAAATAGAAATAATATTAATAAACATATAGGT |       |       |       |       |       |       |       |
| SARS-CoV-2 Reference Genome NC_045512.2              | (1)     | -----                                                                           |       |       |       |       |       |       |       |
|                                                      | (1)     | -----                                                                           |       |       |       |       |       |       |       |
| Section 1072                                         |         |                                                                                 |       |       |       |       |       |       |       |
| Candidatus Carsonella ruddii strain BT chromosome... | (82468) | 82468                                                                           | 82478 | 82489 | 82500 | 82511 | 82522 | 82533 | 82544 |
| Candidatus Carsonella 135557 - 167442nt              | (82468) | TGTTTAATTTCAAATTTTTATCAAAATAAAATTTTTGATAGAAATAATTATTTTAATAATAAAATTTATTATATTAA   |       |       |       |       |       |       |       |
| SARS-CoV-2 Reference Genome NC_045512.2              | (1)     | -----                                                                           |       |       |       |       |       |       |       |
|                                                      | (1)     | -----                                                                           |       |       |       |       |       |       |       |
| Section 1073                                         |         |                                                                                 |       |       |       |       |       |       |       |
| Candidatus Carsonella ruddii strain BT chromosome... | (82545) | 82545                                                                           | 82555 | 82566 | 82577 | 82588 | 82599 | 82610 | 82621 |
| Candidatus Carsonella 135557 - 167442nt              | (82545) | AAATACAAATGTTATTATTAAAAAGAAATAATAGTTTTTATGTAGAAGTAAATTAGAACAAAATTTTTTTGTTTGTA   |       |       |       |       |       |       |       |
| SARS-CoV-2 Reference Genome NC_045512.2              | (1)     | -----                                                                           |       |       |       |       |       |       |       |
|                                                      | (1)     | -----                                                                           |       |       |       |       |       |       |       |
| Section 1074                                         |         |                                                                                 |       |       |       |       |       |       |       |
| Candidatus Carsonella ruddii strain BT chromosome... | (82622) | 82622                                                                           | 82632 | 82643 | 82654 | 82665 | 82676 | 82687 | 82698 |
| Candidatus Carsonella 135557 - 167442nt              | (82622) | AAAATAATATAAAAAAATTTTTTTTAAATTTTAAATTTTAAATTTCTAAAAATAATTTTTTTATTTGTTCAAAGAGAA  |       |       |       |       |       |       |       |
| SARS-CoV-2 Reference Genome NC_045512.2              | (1)     | -----                                                                           |       |       |       |       |       |       |       |
|                                                      | (1)     | -----                                                                           |       |       |       |       |       |       |       |

|                                                                                                                                            |         |                                                                                 |       |       |       |       |       |       |              |
|--------------------------------------------------------------------------------------------------------------------------------------------|---------|---------------------------------------------------------------------------------|-------|-------|-------|-------|-------|-------|--------------|
|                                                                                                                                            |         |                                                                                 |       |       |       |       |       |       | Section 1075 |
| Candidatus Carsonella ruddii strain BT chromosome...<br>Candidatus Carsonella 135557 - 167442nt<br>SARS-CoV-2 Reference Genome NC_045512.2 | (82699) | 82699                                                                           | 82709 | 82720 | 82731 | 82742 | 82753 | 82764 | 82775        |
|                                                                                                                                            | (82699) | ATGAATTTTCATTTAAATTTTAGAATAAAACCTATAATATTTAATATAAATTATTTAAATAAAAAATTTTATAATTA   |       |       |       |       |       |       |              |
|                                                                                                                                            | (1)     | -----                                                                           |       |       |       |       |       |       |              |
|                                                                                                                                            | (1)     | -----                                                                           |       |       |       |       |       |       |              |
|                                                                                                                                            |         |                                                                                 |       |       |       |       |       |       | Section 1076 |
| Candidatus Carsonella ruddii strain BT chromosome...<br>Candidatus Carsonella 135557 - 167442nt<br>SARS-CoV-2 Reference Genome NC_045512.2 | (82776) | 82776                                                                           | 82786 | 82797 | 82808 | 82819 | 82830 | 82841 | 82852        |
|                                                                                                                                            | (82776) | TTTAATGTTTAATTTAATAAAAAATAAATTCATTTTACTCTAAATTATATATGCCTTATATATGGTATCCTGGAAGTG  |       |       |       |       |       |       |              |
|                                                                                                                                            | (1)     | -----                                                                           |       |       |       |       |       |       |              |
|                                                                                                                                            | (1)     | -----                                                                           |       |       |       |       |       |       |              |
|                                                                                                                                            |         |                                                                                 |       |       |       |       |       |       | Section 1077 |
| Candidatus Carsonella ruddii strain BT chromosome...<br>Candidatus Carsonella 135557 - 167442nt<br>SARS-CoV-2 Reference Genome NC_045512.2 | (82853) | 82853                                                                           | 82863 | 82874 | 82885 | 82896 | 82907 | 82918 | 82929        |
|                                                                                                                                            | (82853) | ATATATATTATAAAGATTATTATTATAAAAAATCATTTTTTTTTCTAAACATTGGAAATTATTATCCAATTATACAGAT |       |       |       |       |       |       |              |
|                                                                                                                                            | (1)     | -----                                                                           |       |       |       |       |       |       |              |
|                                                                                                                                            | (1)     | -----                                                                           |       |       |       |       |       |       |              |
|                                                                                                                                            |         |                                                                                 |       |       |       |       |       |       | Section 1078 |
| Candidatus Carsonella ruddii strain BT chromosome...<br>Candidatus Carsonella 135557 - 167442nt<br>SARS-CoV-2 Reference Genome NC_045512.2 | (82930) | 82930                                                                           | 82940 | 82951 | 82962 | 82973 | 82984 | 82995 | 83006        |
|                                                                                                                                            | (82930) | AATAATAAGTTATTATGTTCTATAAATTTAATTATAAAAAATAAAAAAAAAAATTTATTACAACATTTGATAATTATTT |       |       |       |       |       |       |              |
|                                                                                                                                            | (1)     | -----                                                                           |       |       |       |       |       |       |              |
|                                                                                                                                            | (1)     | -----                                                                           |       |       |       |       |       |       |              |
|                                                                                                                                            |         |                                                                                 |       |       |       |       |       |       | Section 1079 |
| Candidatus Carsonella ruddii strain BT chromosome...<br>Candidatus Carsonella 135557 - 167442nt<br>SARS-CoV-2 Reference Genome NC_045512.2 | (83007) | 83007                                                                           | 83017 | 83028 | 83039 | 83050 | 83061 | 83072 | 83083        |
|                                                                                                                                            | (83007) | TTTAAAAATTATTAGTAATATTATGGCAAATACAAGATGAAAAATATTAGTTTTGAAATTTTCCAAACAAAAATATA   |       |       |       |       |       |       |              |
|                                                                                                                                            | (1)     | -----                                                                           |       |       |       |       |       |       |              |
|                                                                                                                                            | (1)     | -----                                                                           |       |       |       |       |       |       |              |
|                                                                                                                                            |         |                                                                                 |       |       |       |       |       |       | Section 1080 |
| Candidatus Carsonella ruddii strain BT chromosome...<br>Candidatus Carsonella 135557 - 167442nt<br>SARS-CoV-2 Reference Genome NC_045512.2 | (83084) | 83084                                                                           | 83094 | 83105 | 83116 | 83127 | 83138 | 83149 | 83160        |
|                                                                                                                                            | (83084) | AAAGAAAGTATTAAATTTGTAAAAATTATAGAAAAAAAAAACCTGTTTTTATTCTATAACATGTAGTAAATTA       |       |       |       |       |       |       |              |
|                                                                                                                                            | (1)     | -----                                                                           |       |       |       |       |       |       |              |
|                                                                                                                                            | (1)     | -----                                                                           |       |       |       |       |       |       |              |

|                                                      |         |                                                                                 |       |       |       |       |       |       |              |
|------------------------------------------------------|---------|---------------------------------------------------------------------------------|-------|-------|-------|-------|-------|-------|--------------|
|                                                      |         |                                                                                 |       |       |       |       |       |       | Section 1081 |
| Candidatus Carsonella ruddii strain BT chromosome... | (83161) | 83161                                                                           | 83171 | 83182 | 83193 | 83204 | 83215 | 83226 | 83237        |
|                                                      | (83161) | TAATTTTGATTTTGTTAAAAC TATTAAGAATAATACTAATATTAAAATTATACCACATATAATTTGTGACAATTTAT  |       |       |       |       |       |       |              |
|                                                      | (1)     | -----                                                                           |       |       |       |       |       |       |              |
|                                                      | (1)     | -----                                                                           |       |       |       |       |       |       |              |
| Candidatus Carsonella 135557 - 167442nt              | (1)     |                                                                                 |       |       |       |       |       |       |              |
| SARS-CoV-2 Reference Genome NC_045512.2              | (1)     |                                                                                 |       |       |       |       |       |       |              |
|                                                      |         |                                                                                 |       |       |       |       |       |       | Section 1082 |
| Candidatus Carsonella ruddii strain BT chromosome... | (83238) | 83238                                                                           | 83248 | 83259 | 83270 | 83281 | 83292 | 83303 | 83314        |
|                                                      | (83238) | ATAATATTGTTTTAAAAATAATTAATTTTATTAAAATTAAAATTTTTAATTTTATAATAATTACTGGAGATAATATT   |       |       |       |       |       |       |              |
|                                                      | (1)     | -----                                                                           |       |       |       |       |       |       |              |
|                                                      | (1)     | -----                                                                           |       |       |       |       |       |       |              |
| Candidatus Carsonella 135557 - 167442nt              | (1)     |                                                                                 |       |       |       |       |       |       |              |
| SARS-CoV-2 Reference Genome NC_045512.2              | (1)     |                                                                                 |       |       |       |       |       |       |              |
|                                                      |         |                                                                                 |       |       |       |       |       |       | Section 1083 |
| Candidatus Carsonella ruddii strain BT chromosome... | (83315) | 83315                                                                           | 83325 | 83336 | 83347 | 83358 | 83369 | 83380 | 83391        |
|                                                      | (83315) | TCTAATAATTCTTTTTTAACAATTAAAAAAATTAGATTTTTTATTTGGACATATAATTAAAATTTTTCTGGATCTTA   |       |       |       |       |       |       |              |
|                                                      | (1)     | -----                                                                           |       |       |       |       |       |       |              |
|                                                      | (1)     | -----                                                                           |       |       |       |       |       |       |              |
| Candidatus Carsonella 135557 - 167442nt              | (1)     |                                                                                 |       |       |       |       |       |       |              |
| SARS-CoV-2 Reference Genome NC_045512.2              | (1)     |                                                                                 |       |       |       |       |       |       |              |
|                                                      |         |                                                                                 |       |       |       |       |       |       | Section 1084 |
| Candidatus Carsonella ruddii strain BT chromosome... | (83392) | 83392                                                                           | 83402 | 83413 | 83424 | 83435 | 83446 | 83457 | 83468        |
|                                                      | (83392) | TTTAGAAGAACATAAATTATCATCTAATATAAATAAGAAATCTTTTTATTATATAAAAAAAAAAAAAATAGGTATTA   |       |       |       |       |       |       |              |
|                                                      | (1)     | -----                                                                           |       |       |       |       |       |       |              |
|                                                      | (1)     | -----                                                                           |       |       |       |       |       |       |              |
| Candidatus Carsonella 135557 - 167442nt              | (1)     |                                                                                 |       |       |       |       |       |       |              |
| SARS-CoV-2 Reference Genome NC_045512.2              | (1)     |                                                                                 |       |       |       |       |       |       |              |
|                                                      |         |                                                                                 |       |       |       |       |       |       | Section 1085 |
| Candidatus Carsonella ruddii strain BT chromosome... | (83469) | 83469                                                                           | 83479 | 83490 | 83501 | 83512 | 83523 | 83534 | 83545        |
|                                                      | (83469) | ATTTATTTTTTAACACAATTTTTTTTATAATTTTAAATATAATAAATTATTATTTAAATAAAATCAAAAAACATATATA |       |       |       |       |       |       |              |
|                                                      | (1)     | -----                                                                           |       |       |       |       |       |       |              |
|                                                      | (1)     | -----                                                                           |       |       |       |       |       |       |              |
| Candidatus Carsonella 135557 - 167442nt              | (1)     |                                                                                 |       |       |       |       |       |       |              |
| SARS-CoV-2 Reference Genome NC_045512.2              | (1)     |                                                                                 |       |       |       |       |       |       |              |
|                                                      |         |                                                                                 |       |       |       |       |       |       | Section 1086 |
| Candidatus Carsonella ruddii strain BT chromosome... | (83546) | 83546                                                                           | 83556 | 83567 | 83578 | 83589 | 83600 | 83611 | 83622        |
|                                                      | (83546) | AATAAAAATTTTATTCCTGGTATTTTTTCCTAAAAAAATATAAAAGAAATTTTATTATTTTATAAATAAATGTAAAT   |       |       |       |       |       |       |              |
|                                                      | (1)     | -----                                                                           |       |       |       |       |       |       |              |
|                                                      | (1)     | -----                                                                           |       |       |       |       |       |       |              |
| Candidatus Carsonella 135557 - 167442nt              | (1)     |                                                                                 |       |       |       |       |       |       |              |
| SARS-CoV-2 Reference Genome NC_045512.2              | (1)     |                                                                                 |       |       |       |       |       |       |              |

## SARS-CoV-2 &amp; Bakterien.apr

|                                                      |         |                                                                                |       |       |       |       |       |       |       |
|------------------------------------------------------|---------|--------------------------------------------------------------------------------|-------|-------|-------|-------|-------|-------|-------|
| Section 1087                                         |         |                                                                                |       |       |       |       |       |       |       |
| Candidatus Carsonella ruddii strain BT chromosome... | (83623) | 83623                                                                          | 83633 | 83644 | 83655 | 83666 | 83677 | 83688 | 83699 |
|                                                      | (83623) | TGAAATTC CAATTTGGATAATAAAAAATTATGATTTTATTAATATAAAAAATTATTTATTAAAAAATTTAAATATTT |       |       |       |       |       |       |       |
|                                                      | (1)     | -----                                                                          |       |       |       |       |       |       |       |
| Candidatus Carsonella 135557 - 167442nt              | (1)     | -----                                                                          |       |       |       |       |       |       |       |
| SARS-CoV-2 Reference Genome NC_045512.2              | (1)     | -----                                                                          |       |       |       |       |       |       |       |
| Section 1088                                         |         |                                                                                |       |       |       |       |       |       |       |
| Candidatus Carsonella ruddii strain BT chromosome... | (83700) | 83700                                                                          | 83710 | 83721 | 83732 | 83743 | 83754 | 83765 | 83776 |
|                                                      | (83700) | TTAAACATTTTCATTTTATACTTTTAATAAAATTAATTTTGTAGATTATTATTTAAAGTAAATTTTTTGTATAA     |       |       |       |       |       |       |       |
|                                                      | (1)     | -----                                                                          |       |       |       |       |       |       |       |
| Candidatus Carsonella 135557 - 167442nt              | (1)     | -----                                                                          |       |       |       |       |       |       |       |
| SARS-CoV-2 Reference Genome NC_045512.2              | (1)     | -----                                                                          |       |       |       |       |       |       |       |
| Section 1089                                         |         |                                                                                |       |       |       |       |       |       |       |
| Candidatus Carsonella ruddii strain BT chromosome... | (83777) | 83777                                                                          | 83787 | 83798 | 83809 | 83820 | 83831 | 83842 | 83853 |
|                                                      | (83777) | TTTATAAAAAAATTTATTAAAAATTATTTTAAATTTATTTTTTTTGTATTGATATTTAAAAAATATTTTAAT       |       |       |       |       |       |       |       |
|                                                      | (1)     | -----                                                                          |       |       |       |       |       |       |       |
| Candidatus Carsonella 135557 - 167442nt              | (1)     | -----                                                                          |       |       |       |       |       |       |       |
| SARS-CoV-2 Reference Genome NC_045512.2              | (1)     | -----                                                                          |       |       |       |       |       |       |       |
| Section 1090                                         |         |                                                                                |       |       |       |       |       |       |       |
| Candidatus Carsonella ruddii strain BT chromosome... | (83854) | 83854                                                                          | 83864 | 83875 | 83886 | 83897 | 83908 | 83919 | 83930 |
|                                                      | (83854) | TTTTAAAAAATTTTATTATTATAATAAATAGTTTTTTTATTCATAATTTTATTATTAAATTGTTTTTCTAA        |       |       |       |       |       |       |       |
|                                                      | (1)     | -----                                                                          |       |       |       |       |       |       |       |
| Candidatus Carsonella 135557 - 167442nt              | (1)     | -----                                                                          |       |       |       |       |       |       |       |
| SARS-CoV-2 Reference Genome NC_045512.2              | (1)     | -----                                                                          |       |       |       |       |       |       |       |
| Section 1091                                         |         |                                                                                |       |       |       |       |       |       |       |
| Candidatus Carsonella ruddii strain BT chromosome... | (83931) | 83931                                                                          | 83941 | 83952 | 83963 | 83974 | 83985 | 83996 | 84007 |
|                                                      | (83931) | AAAAAATTTAAATTTTGATAAAAAAGTTAAAAATAATTTATTTTAAAAAATTTGATTTTTTTTACAATTA         |       |       |       |       |       |       |       |
|                                                      | (1)     | -----                                                                          |       |       |       |       |       |       |       |
| Candidatus Carsonella 135557 - 167442nt              | (1)     | -----                                                                          |       |       |       |       |       |       |       |
| SARS-CoV-2 Reference Genome NC_045512.2              | (1)     | -----                                                                          |       |       |       |       |       |       |       |
| Section 1092                                         |         |                                                                                |       |       |       |       |       |       |       |
| Candidatus Carsonella ruddii strain BT chromosome... | (84008) | 84008                                                                          | 84018 | 84029 | 84040 | 84051 | 84062 | 84073 | 84084 |
|                                                      | (84008) | TATGTTTTTTTACAATTGGGATTATAGCTCAGTTGGTTAGAGCATGCCTTTGATAAGGGCAGGGTCAATAGTTCAAA  |       |       |       |       |       |       |       |
|                                                      | (1)     | -----                                                                          |       |       |       |       |       |       |       |
| Candidatus Carsonella 135557 - 167442nt              | (1)     | -----                                                                          |       |       |       |       |       |       |       |
| SARS-CoV-2 Reference Genome NC_045512.2              | (1)     | -----                                                                          |       |       |       |       |       |       |       |

## SARS-CoV-2 &amp; Bakterien.apr

|                                                      |         |                                                                                 |       |       |       |       |       |       |       |
|------------------------------------------------------|---------|---------------------------------------------------------------------------------|-------|-------|-------|-------|-------|-------|-------|
| Section 1093                                         |         |                                                                                 |       |       |       |       |       |       |       |
| Candidatus Carsonella ruddii strain BT chromosome... | (84085) | 84085                                                                           | 84095 | 84106 | 84117 | 84128 | 84139 | 84150 | 84161 |
|                                                      | (84085) | TCTATTTAATCCCATTGTGTAATAATATTATAAATAATACTTAATATATATAAATCATCAAAAAAATTAAATTCATTA  |       |       |       |       |       |       |       |
|                                                      | (1)     | -----                                                                           |       |       |       |       |       |       |       |
|                                                      | (1)     | -----                                                                           |       |       |       |       |       |       |       |
| Candidatus Carsonella 135557 - 167442nt              | (1)     | -----                                                                           |       |       |       |       |       |       |       |
| SARS-CoV-2 Reference Genome NC_045512.2              | (1)     | -----                                                                           |       |       |       |       |       |       |       |
| Section 1094                                         |         |                                                                                 |       |       |       |       |       |       |       |
| Candidatus Carsonella ruddii strain BT chromosome... | (84162) | 84162                                                                           | 84172 | 84183 | 84194 | 84205 | 84216 | 84227 | 84238 |
|                                                      | (84162) | ATTTTATGAATTGTTTTATTTAATAATCCTAATTCAAAAATAATTTGATTTATTATAAAAAATAATAACAATATCTTAA |       |       |       |       |       |       |       |
|                                                      | (1)     | -----                                                                           |       |       |       |       |       |       |       |
|                                                      | (1)     | -----                                                                           |       |       |       |       |       |       |       |
| Candidatus Carsonella 135557 - 167442nt              | (1)     | -----                                                                           |       |       |       |       |       |       |       |
| SARS-CoV-2 Reference Genome NC_045512.2              | (1)     | -----                                                                           |       |       |       |       |       |       |       |
| Section 1095                                         |         |                                                                                 |       |       |       |       |       |       |       |
| Candidatus Carsonella ruddii strain BT chromosome... | (84239) | 84239                                                                           | 84249 | 84260 | 84271 | 84282 | 84293 | 84304 | 84315 |
|                                                      | (84239) | ATCAGAAGTACCACCAAAAAATTTATTTTTGAAAATATATTTTGAATATAATAAATTGAATTAAAAATTTTTTTTA    |       |       |       |       |       |       |       |
|                                                      | (1)     | -----                                                                           |       |       |       |       |       |       |       |
|                                                      | (1)     | -----                                                                           |       |       |       |       |       |       |       |
| Candidatus Carsonella 135557 - 167442nt              | (1)     | -----                                                                           |       |       |       |       |       |       |       |
| SARS-CoV-2 Reference Genome NC_045512.2              | (1)     | -----                                                                           |       |       |       |       |       |       |       |
| Section 1096                                         |         |                                                                                 |       |       |       |       |       |       |       |
| Candidatus Carsonella ruddii strain BT chromosome... | (84316) | 84316                                                                           | 84326 | 84337 | 84348 | 84359 | 84370 | 84381 | 84392 |
|                                                      | (84316) | AATAAAAAATTTTTATAACAAAAAAGGGAATACCCTAAAAATCCAATTAAAAATAAGAGTTTTTAAATTTTAAAAAA   |       |       |       |       |       |       |       |
|                                                      | (1)     | -----                                                                           |       |       |       |       |       |       |       |
|                                                      | (1)     | -----                                                                           |       |       |       |       |       |       |       |
| Candidatus Carsonella 135557 - 167442nt              | (1)     | -----                                                                           |       |       |       |       |       |       |       |
| SARS-CoV-2 Reference Genome NC_045512.2              | (1)     | -----                                                                           |       |       |       |       |       |       |       |
| Section 1097                                         |         |                                                                                 |       |       |       |       |       |       |       |
| Candidatus Carsonella ruddii strain BT chromosome... | (84393) | 84393                                                                           | 84403 | 84414 | 84425 | 84436 | 84447 | 84458 | 84469 |
|                                                      | (84393) | TTAAATAAATTTTTTTTAAAAAAATTATATTTTTTATAAAAAAAATCTATAATTAATTTTAACAAAAAAATAAT      |       |       |       |       |       |       |       |
|                                                      | (1)     | -----                                                                           |       |       |       |       |       |       |       |
|                                                      | (1)     | -----                                                                           |       |       |       |       |       |       |       |
| Candidatus Carsonella 135557 - 167442nt              | (1)     | -----                                                                           |       |       |       |       |       |       |       |
| SARS-CoV-2 Reference Genome NC_045512.2              | (1)     | -----                                                                           |       |       |       |       |       |       |       |
| Section 1098                                         |         |                                                                                 |       |       |       |       |       |       |       |
| Candidatus Carsonella ruddii strain BT chromosome... | (84470) | 84470                                                                           | 84480 | 84491 | 84502 | 84513 | 84524 | 84535 | 84546 |
|                                                      | (84470) | TGGTGTTAAATTATCTAATTTTGATATACTAAAAACATTATTTAATTCAAAAATTTCTTTTTTATCAAAAACATAAT   |       |       |       |       |       |       |       |
|                                                      | (1)     | -----                                                                           |       |       |       |       |       |       |       |
|                                                      | (1)     | -----                                                                           |       |       |       |       |       |       |       |
| Candidatus Carsonella 135557 - 167442nt              | (1)     | -----                                                                           |       |       |       |       |       |       |       |
| SARS-CoV-2 Reference Genome NC_045512.2              | (1)     | -----                                                                           |       |       |       |       |       |       |       |

## SARS-CoV-2 &amp; Bakterien.apr

|                                                      |         |                                                                                 |       |       |       |       |       |       |       |
|------------------------------------------------------|---------|---------------------------------------------------------------------------------|-------|-------|-------|-------|-------|-------|-------|
| Section 1099                                         |         |                                                                                 |       |       |       |       |       |       |       |
| Candidatus Carsonella ruddii strain BT chromosome... | (84547) | 84547                                                                           | 84557 | 84568 | 84579 | 84590 | 84601 | 84612 | 84623 |
| Candidatus Carsonella 135557 - 167442nt              | (84547) | TTTTAAAATTATGTATTTTTTGTAAAGAAAAATTTATTATGTTTTTACCAATATAAGCGCAATGTTTTTGTTTACCG   |       |       |       |       |       |       |       |
| SARS-CoV-2 Reference Genome NC_045512.2              | (1)     | -----                                                                           |       |       |       |       |       |       |       |
|                                                      | (1)     | -----                                                                           |       |       |       |       |       |       |       |
| Section 1100                                         |         |                                                                                 |       |       |       |       |       |       |       |
| Candidatus Carsonella ruddii strain BT chromosome... | (84624) | 84624                                                                           | 84634 | 84645 | 84656 | 84667 | 84678 | 84689 | 84700 |
| Candidatus Carsonella 135557 - 167442nt              | (84624) | ATAAAAATTAATTTAAAATTATAAGATCCTCTTCTTGATATTTTAATATAATCTCCTATTATTTCTTTTGAAGTAGG   |       |       |       |       |       |       |       |
| SARS-CoV-2 Reference Genome NC_045512.2              | (1)     | -----                                                                           |       |       |       |       |       |       |       |
|                                                      | (1)     | -----                                                                           |       |       |       |       |       |       |       |
| Section 1101                                         |         |                                                                                 |       |       |       |       |       |       |       |
| Candidatus Carsonella ruddii strain BT chromosome... | (84701) | 84701                                                                           | 84711 | 84722 | 84733 | 84744 | 84755 | 84766 | 84777 |
| Candidatus Carsonella 135557 - 167442nt              | (84701) | TTCAGCGCCAAAAACAAATTAAAAACATAATTTCTTTTTTTTAAATATTTATTGAATATTGAATTCCATAAATAG     |       |       |       |       |       |       |       |
| SARS-CoV-2 Reference Genome NC_045512.2              | (1)     | -----                                                                           |       |       |       |       |       |       |       |
|                                                      | (1)     | -----                                                                           |       |       |       |       |       |       |       |
| Section 1102                                         |         |                                                                                 |       |       |       |       |       |       |       |
| Candidatus Carsonella ruddii strain BT chromosome... | (84778) | 84778                                                                           | 84788 | 84799 | 84810 | 84821 | 84832 | 84843 | 84854 |
| Candidatus Carsonella 135557 - 167442nt              | (84778) | ATAAATTTTCTTCATCATTTGTTAAATAAAATTATTATTTTTAGATAAAAAAAAAAATGAACAAAAACCACCTTTC    |       |       |       |       |       |       |       |
| SARS-CoV-2 Reference Genome NC_045512.2              | (1)     | -----                                                                           |       |       |       |       |       |       |       |
|                                                      | (1)     | -----                                                                           |       |       |       |       |       |       |       |
| Section 1103                                         |         |                                                                                 |       |       |       |       |       |       |       |
| Candidatus Carsonella ruddii strain BT chromosome... | (84855) | 84855                                                                           | 84865 | 84876 | 84887 | 84898 | 84909 | 84920 | 84931 |
| Candidatus Carsonella 135557 - 167442nt              | (84855) | ATATCTGTAATTCTCTACAAAAATTTTTTTTTTAAACAAATACAACATAAAAGGTGGTTTAAATCCATTTAATATA    |       |       |       |       |       |       |       |
| SARS-CoV-2 Reference Genome NC_045512.2              | (1)     | -----                                                                           |       |       |       |       |       |       |       |
|                                                      | (1)     | -----                                                                           |       |       |       |       |       |       |       |
| Section 1104                                         |         |                                                                                 |       |       |       |       |       |       |       |
| Candidatus Carsonella ruddii strain BT chromosome... | (84932) | 84932                                                                           | 84942 | 84953 | 84964 | 84975 | 84986 | 84997 | 85008 |
| Candidatus Carsonella 135557 - 167442nt              | (84932) | TCCTTCATTAACTACATCTAAATGAGAAATAAAAAATTTCTTTAGATTTTGTAATAAATAACAAATTAATTACATTTTC |       |       |       |       |       |       |       |
| SARS-CoV-2 Reference Genome NC_045512.2              | (1)     | -----                                                                           |       |       |       |       |       |       |       |
|                                                      | (1)     | -----                                                                           |       |       |       |       |       |       |       |



## SARS-CoV-2 &amp; Bakterien.apr

|                                                      |         |                                                                                 |       |       |       |       |       |       |       |
|------------------------------------------------------|---------|---------------------------------------------------------------------------------|-------|-------|-------|-------|-------|-------|-------|
| Section 1105                                         |         |                                                                                 |       |       |       |       |       |       |       |
| Candidatus Carsonella ruddii strain BT chromosome... | (85009) | 85009                                                                           | 85019 | 85030 | 85041 | 85052 | 85063 | 85074 | 85085 |
|                                                      | (85009) | TAATTTTAATAATTTCAAACGATTTAATTTCAAATATTTTAATATTATAAAAAATATATTTTTCATAACAATAAGAA   |       |       |       |       |       |       |       |
|                                                      | (1)     | -----                                                                           |       |       |       |       |       |       |       |
|                                                      | (1)     | -----                                                                           |       |       |       |       |       |       |       |
| Candidatus Carsonella 135557 - 167442nt              | (1)     | -----                                                                           |       |       |       |       |       |       |       |
| SARS-CoV-2 Reference Genome NC_045512.2              | (1)     | -----                                                                           |       |       |       |       |       |       |       |
| Section 1106                                         |         |                                                                                 |       |       |       |       |       |       |       |
| Candidatus Carsonella ruddii strain BT chromosome... | (85086) | 85086                                                                           | 85096 | 85107 | 85118 | 85129 | 85140 | 85151 | 85162 |
|                                                      | (85086) | AAAGTTTTTTTTTATCAAAAAAATTTTAAAAAAAAAAAAAAAAATTAATTAGCATTAATTATTGTGTAAAATTTTATTT |       |       |       |       |       |       |       |
|                                                      | (1)     | -----                                                                           |       |       |       |       |       |       |       |
|                                                      | (1)     | -----                                                                           |       |       |       |       |       |       |       |
| Candidatus Carsonella 135557 - 167442nt              | (1)     | -----                                                                           |       |       |       |       |       |       |       |
| SARS-CoV-2 Reference Genome NC_045512.2              | (1)     | -----                                                                           |       |       |       |       |       |       |       |
| Section 1107                                         |         |                                                                                 |       |       |       |       |       |       |       |
| Candidatus Carsonella ruddii strain BT chromosome... | (85163) | 85163                                                                           | 85173 | 85184 | 85195 | 85206 | 85217 | 85228 | 85239 |
|                                                      | (85163) | ATATTAATTGTTTTTGTAAATTTTTACAACATTCTATCTTCCATTTAAAGAATTTCTATAAAATATTAAATTATT     |       |       |       |       |       |       |       |
|                                                      | (1)     | -----                                                                           |       |       |       |       |       |       |       |
|                                                      | (1)     | -----                                                                           |       |       |       |       |       |       |       |
| Candidatus Carsonella 135557 - 167442nt              | (1)     | -----                                                                           |       |       |       |       |       |       |       |
| SARS-CoV-2 Reference Genome NC_045512.2              | (1)     | -----                                                                           |       |       |       |       |       |       |       |
| Section 1108                                         |         |                                                                                 |       |       |       |       |       |       |       |
| Candidatus Carsonella ruddii strain BT chromosome... | (85240) | 85240                                                                           | 85250 | 85261 | 85272 | 85283 | 85294 | 85305 | 85316 |
|                                                      | (85240) | AATAAAAGAAAGTTTTTTAGCTTTTATAATAATAAAATTATTATTTAAAAATAAAAAATTTTTGTACCAGCAGTTA    |       |       |       |       |       |       |       |
|                                                      | (1)     | -----                                                                           |       |       |       |       |       |       |       |
|                                                      | (1)     | -----                                                                           |       |       |       |       |       |       |       |
| Candidatus Carsonella 135557 - 167442nt              | (1)     | -----                                                                           |       |       |       |       |       |       |       |
| SARS-CoV-2 Reference Genome NC_045512.2              | (1)     | -----                                                                           |       |       |       |       |       |       |       |
| Section 1109                                         |         |                                                                                 |       |       |       |       |       |       |       |
| Candidatus Carsonella ruddii strain BT chromosome... | (85317) | 85317                                                                           | 85327 | 85338 | 85349 | 85360 | 85371 | 85382 | 85393 |
|                                                      | (85317) | TATATAATCCTGCCTCAATAATACAATTATTTCTTAACTAAATCCAATTCCTGAATTAGCACCTAATAAACAATTA    |       |       |       |       |       |       |       |
|                                                      | (1)     | -----                                                                           |       |       |       |       |       |       |       |
|                                                      | (1)     | -----                                                                           |       |       |       |       |       |       |       |
| Candidatus Carsonella 135557 - 167442nt              | (1)     | -----                                                                           |       |       |       |       |       |       |       |
| SARS-CoV-2 Reference Genome NC_045512.2              | (1)     | -----                                                                           |       |       |       |       |       |       |       |
| Section 1110                                         |         |                                                                                 |       |       |       |       |       |       |       |
| Candidatus Carsonella ruddii strain BT chromosome... | (85394) | 85394                                                                           | 85404 | 85415 | 85426 | 85437 | 85448 | 85459 | 85470 |
|                                                      | (85394) | TTTCCTAACTAATAATATTTTTTCTCCACCAGATAATGTTCCCATTATTGAAGCAGATCCACCTATATCTGTATT     |       |       |       |       |       |       |       |
|                                                      | (1)     | -----                                                                           |       |       |       |       |       |       |       |
|                                                      | (1)     | -----                                                                           |       |       |       |       |       |       |       |
| Candidatus Carsonella 135557 - 167442nt              | (1)     | -----                                                                           |       |       |       |       |       |       |       |
| SARS-CoV-2 Reference Genome NC_045512.2              | (1)     | -----                                                                           |       |       |       |       |       |       |       |

|                                                      |         |                                                                                |       |       |       |       |       |       |       |
|------------------------------------------------------|---------|--------------------------------------------------------------------------------|-------|-------|-------|-------|-------|-------|-------|
| Section 1111                                         |         |                                                                                |       |       |       |       |       |       |       |
| Candidatus Carsonella ruddii strain BT chromosome... | (85471) | 85471                                                                          | 85481 | 85492 | 85503 | 85514 | 85525 | 85536 | 85547 |
|                                                      | (85471) | ATTTGAGATATAAACTCCAGAAGATATTCTTCCTTCAATCATACAATTATTACCTATAAAATGTATTAAAATTTACAT |       |       |       |       |       |       |       |
|                                                      | (1)     | -----                                                                          |       |       |       |       |       |       |       |
|                                                      | (1)     | -----                                                                          |       |       |       |       |       |       |       |
| Candidatus Carsonella 135557 - 167442nt              | (1)     | -----                                                                          |       |       |       |       |       |       |       |
| SARS-CoV-2 Reference Genome NC_045512.2              | (1)     | -----                                                                          |       |       |       |       |       |       |       |
| Section 1112                                         |         |                                                                                |       |       |       |       |       |       |       |
| Candidatus Carsonella ruddii strain BT chromosome... | (85548) | 85548                                                                          | 85558 | 85569 | 85580 | 85591 | 85602 | 85613 | 85624 |
|                                                      | (85548) | AACCTTCAGACATAATAGTTGTTTCCTTTTGATAAAAAAGCTCCTAATCTTACTCTATTTGTGTTAGATAATCTAATA |       |       |       |       |       |       |       |
|                                                      | (1)     | -----                                                                          |       |       |       |       |       |       |       |
|                                                      | (1)     | -----                                                                          |       |       |       |       |       |       |       |
| Candidatus Carsonella 135557 - 167442nt              | (1)     | -----                                                                          |       |       |       |       |       |       |       |
| SARS-CoV-2 Reference Genome NC_045512.2              | (1)     | -----                                                                          |       |       |       |       |       |       |       |
| Section 1113                                         |         |                                                                                |       |       |       |       |       |       |       |
| Candidatus Carsonella ruddii strain BT chromosome... | (85625) | 85625                                                                          | 85635 | 85646 | 85657 | 85668 | 85679 | 85690 | 85701 |
|                                                      | (85625) | TTACTTGGTAAATAAAATTTTGTAAAGATAAGGTATTTTATCAATACTTTCAATTATTAAATTAATTTTGTTTATATT |       |       |       |       |       |       |       |
|                                                      | (1)     | -----                                                                          |       |       |       |       |       |       |       |
|                                                      | (1)     | -----                                                                          |       |       |       |       |       |       |       |
| Candidatus Carsonella 135557 - 167442nt              | (1)     | -----                                                                          |       |       |       |       |       |       |       |
| SARS-CoV-2 Reference Genome NC_045512.2              | (1)     | -----                                                                          |       |       |       |       |       |       |       |
| Section 1114                                         |         |                                                                                |       |       |       |       |       |       |       |
| Candidatus Carsonella ruddii strain BT chromosome... | (85702) | 85702                                                                          | 85712 | 85723 | 85734 | 85745 | 85756 | 85767 | 85778 |
|                                                      | (85702) | TATTTTTGTAAATCTTCAATATAATAACAACCTATATTTGTCCAAATTAAATTTATTAATTTTTCAAATATATTGT   |       |       |       |       |       |       |       |
|                                                      | (1)     | -----                                                                          |       |       |       |       |       |       |       |
|                                                      | (1)     | -----                                                                          |       |       |       |       |       |       |       |
| Candidatus Carsonella 135557 - 167442nt              | (1)     | -----                                                                          |       |       |       |       |       |       |       |
| SARS-CoV-2 Reference Genome NC_045512.2              | (1)     | -----                                                                          |       |       |       |       |       |       |       |
| Section 1115                                         |         |                                                                                |       |       |       |       |       |       |       |
| Candidatus Carsonella ruddii strain BT chromosome... | (85779) | 85779                                                                          | 85789 | 85800 | 85811 | 85822 | 85833 | 85844 | 85855 |
|                                                      | (85779) | TTAAATTAATAAAATTACAAAGAAGTATTCCAATACTAATTAAATATAGTTTAAATAAACCATCTATATTTGATATT  |       |       |       |       |       |       |       |
|                                                      | (1)     | -----                                                                          |       |       |       |       |       |       |       |
|                                                      | (1)     | -----                                                                          |       |       |       |       |       |       |       |
| Candidatus Carsonella 135557 - 167442nt              | (1)     | -----                                                                          |       |       |       |       |       |       |       |
| SARS-CoV-2 Reference Genome NC_045512.2              | (1)     | -----                                                                          |       |       |       |       |       |       |       |
| Section 1116                                         |         |                                                                                |       |       |       |       |       |       |       |
| Candidatus Carsonella ruddii strain BT chromosome... | (85856) | 85856                                                                          | 85866 | 85877 | 85888 | 85899 | 85910 | 85921 | 85932 |
|                                                      | (85856) | ATATTATTAATAAATATTGTTGTTATTAAAAATAACATTTTTTAAATTTATTTTTTTCCAAAAATTAAATATAAACAT |       |       |       |       |       |       |       |
|                                                      | (1)     | -----                                                                          |       |       |       |       |       |       |       |
|                                                      | (1)     | -----                                                                          |       |       |       |       |       |       |       |
| Candidatus Carsonella 135557 - 167442nt              | (1)     | -----                                                                          |       |       |       |       |       |       |       |
| SARS-CoV-2 Reference Genome NC_045512.2              | (1)     | -----                                                                          |       |       |       |       |       |       |       |

## SARS-CoV-2 &amp; Bakterien.apr

|                                                      |         |                                                                               |       |       |       |       |       |             |
|------------------------------------------------------|---------|-------------------------------------------------------------------------------|-------|-------|-------|-------|-------|-------------|
|                                                      |         | Section 1117                                                                  |       |       |       |       |       |             |
| Candidatus Carsonella ruddii strain BT chromosome... | (85933) | 85933                                                                         | 85943 | 85954 | 85965 | 85976 | 85987 | 85998 86009 |
|                                                      | (85933) | TAAATAAATAATTTGTTTTATATTTAACATTTTTTTAAATAATTTTTTTTTTATTTTTAAAAAATAATTTTTTTT   |       |       |       |       |       |             |
|                                                      | (1)     | -----                                                                         |       |       |       |       |       |             |
| Candidatus Carsonella 135557 - 167442nt              | (1)     | -----                                                                         |       |       |       |       |       |             |
| SARS-CoV-2 Reference Genome NC_045512.2              | (1)     | -----                                                                         |       |       |       |       |       |             |
|                                                      |         | Section 1118                                                                  |       |       |       |       |       |             |
| Candidatus Carsonella ruddii strain BT chromosome... | (86010) | 86010                                                                         | 86020 | 86031 | 86042 | 86053 | 86064 | 86075 86086 |
|                                                      | (86010) | TAATAGCTATAAAATTACAAATTATTATTTTTTTTTTTTTTATATTTGTTTTATAAATTATTAAAGAATTATATAAC |       |       |       |       |       |             |
|                                                      | (1)     | -----                                                                         |       |       |       |       |       |             |
| Candidatus Carsonella 135557 - 167442nt              | (1)     | -----                                                                         |       |       |       |       |       |             |
| SARS-CoV-2 Reference Genome NC_045512.2              | (1)     | -----                                                                         |       |       |       |       |       |             |
|                                                      |         | Section 1119                                                                  |       |       |       |       |       |             |
| Candidatus Carsonella ruddii strain BT chromosome... | (86087) | 86087                                                                         | 86097 | 86108 | 86119 | 86130 | 86141 | 86152 86163 |
|                                                      | (86087) | ATATTTTCATTTTTCTTAATGTTGTTAAATTTATTTTTTTATTATAAATATACAATGTATGTTCCCATTTGAAACTT |       |       |       |       |       |             |
|                                                      | (1)     | -----                                                                         |       |       |       |       |       |             |
| Candidatus Carsonella 135557 - 167442nt              | (1)     | -----                                                                         |       |       |       |       |       |             |
| SARS-CoV-2 Reference Genome NC_045512.2              | (1)     | -----                                                                         |       |       |       |       |       |             |
|                                                      |         | Section 1120                                                                  |       |       |       |       |       |             |
| Candidatus Carsonella ruddii strain BT chromosome... | (86164) | 86164                                                                         | 86174 | 86185 | 86196 | 86207 | 86218 | 86229 86240 |
|                                                      | (86164) | AAATTATTTTTTTTTGTAAAAAATATTTAAAAATCAATTCCTTTTTGTTTTAAAAATAAACATAGGTTCTAT      |       |       |       |       |       |             |
|                                                      | (1)     | -----                                                                         |       |       |       |       |       |             |
| Candidatus Carsonella 135557 - 167442nt              | (1)     | -----                                                                         |       |       |       |       |       |             |
| SARS-CoV-2 Reference Genome NC_045512.2              | (1)     | -----                                                                         |       |       |       |       |       |             |
|                                                      |         | Section 1121                                                                  |       |       |       |       |       |             |
| Candidatus Carsonella ruddii strain BT chromosome... | (86241) | 86241                                                                         | 86251 | 86262 | 86273 | 86284 | 86295 | 86306 86317 |
|                                                      | (86241) | AGTAAACTATCAAAATTTTTATTTTTTTACTATTTTTATTAAAAATTATGTTTTATAATTAATTTATTATGTAATT  |       |       |       |       |       |             |
|                                                      | (1)     | -----                                                                         |       |       |       |       |       |             |
| Candidatus Carsonella 135557 - 167442nt              | (1)     | -----                                                                         |       |       |       |       |       |             |
| SARS-CoV-2 Reference Genome NC_045512.2              | (1)     | -----                                                                         |       |       |       |       |       |             |
|                                                      |         | Section 1122                                                                  |       |       |       |       |       |             |
| Candidatus Carsonella ruddii strain BT chromosome... | (86318) | 86318                                                                         | 86328 | 86339 | 86350 | 86361 | 86372 | 86383 86394 |
|                                                      | (86318) | TTTTAAAAATTCCATGACTACAATATTCCTTCATTAATAAAAAATTTTTTTTTAAAAATAATATTATTTTATTAATA |       |       |       |       |       |             |
|                                                      | (1)     | -----                                                                         |       |       |       |       |       |             |
| Candidatus Carsonella 135557 - 167442nt              | (1)     | -----                                                                         |       |       |       |       |       |             |
| SARS-CoV-2 Reference Genome NC_045512.2              | (1)     | -----                                                                         |       |       |       |       |       |             |

## SARS-CoV-2 &amp; Bakterien.apr

|                                                                                                                                            |         |                                                                                |       |       |       |       |       |       |              |
|--------------------------------------------------------------------------------------------------------------------------------------------|---------|--------------------------------------------------------------------------------|-------|-------|-------|-------|-------|-------|--------------|
|                                                                                                                                            |         |                                                                                |       |       |       |       |       |       | Section 1123 |
| Candidatus Carsonella ruddii strain BT chromosome...<br>Candidatus Carsonella 135557 - 167442nt<br>SARS-CoV-2 Reference Genome NC_045512.2 | (86395) | 86395                                                                          | 86405 | 86416 | 86427 | 86438 | 86449 | 86460 | 86471        |
|                                                                                                                                            | (86395) | AAAGAAAAAGATACATTTATTTTAAATATAATTTAATATATTATAAAAAAAATTTTAAATAAAAAATTTTTTTTAAAC |       |       |       |       |       |       |              |
|                                                                                                                                            | (1)     | -----                                                                          |       |       |       |       |       |       |              |
|                                                                                                                                            | (1)     | -----                                                                          |       |       |       |       |       |       |              |
|                                                                                                                                            |         |                                                                                |       |       |       |       |       |       | Section 1124 |
| Candidatus Carsonella ruddii strain BT chromosome...<br>Candidatus Carsonella 135557 - 167442nt<br>SARS-CoV-2 Reference Genome NC_045512.2 | (86472) | 86472                                                                          | 86482 | 86493 | 86504 | 86515 | 86526 | 86537 | 86548        |
|                                                                                                                                            | (86472) | ATAATTAAAAATTATTTACATAACAACATCACTGTGTAAATTATTAAATTTTAAAGAAATATCTAATTTAAATAAT   |       |       |       |       |       |       |              |
|                                                                                                                                            | (1)     | -----                                                                          |       |       |       |       |       |       |              |
|                                                                                                                                            | (1)     | -----                                                                          |       |       |       |       |       |       |              |
|                                                                                                                                            |         |                                                                                |       |       |       |       |       |       | Section 1125 |
| Candidatus Carsonella ruddii strain BT chromosome...<br>Candidatus Carsonella 135557 - 167442nt<br>SARS-CoV-2 Reference Genome NC_045512.2 | (86549) | 86549                                                                          | 86559 | 86570 | 86581 | 86592 | 86603 | 86614 | 86625        |
|                                                                                                                                            | (86549) | TATATTTATAAAATTCAACGATAGGTATTCCATGACAAATTATATTTTCAATAGAAATACATGATGAAAATTTATAA  |       |       |       |       |       |       |              |
|                                                                                                                                            | (1)     | -----                                                                          |       |       |       |       |       |       |              |
|                                                                                                                                            | (1)     | -----                                                                          |       |       |       |       |       |       |              |
|                                                                                                                                            |         |                                                                                |       |       |       |       |       |       | Section 1126 |
| Candidatus Carsonella ruddii strain BT chromosome...<br>Candidatus Carsonella 135557 - 167442nt<br>SARS-CoV-2 Reference Genome NC_045512.2 | (86626) | 86626                                                                          | 86636 | 86647 | 86658 | 86669 | 86680 | 86691 | 86702        |
|                                                                                                                                            | (86626) | TTATAAAAATTTATAGTTGAAGATTTACATTTTATTTTTATAATAAAATATAAACTAATAAAATCTAATTCATATAA  |       |       |       |       |       |       |              |
|                                                                                                                                            | (1)     | -----                                                                          |       |       |       |       |       |       |              |
|                                                                                                                                            | (1)     | -----                                                                          |       |       |       |       |       |       |              |
|                                                                                                                                            |         |                                                                                |       |       |       |       |       |       | Section 1127 |
| Candidatus Carsonella ruddii strain BT chromosome...<br>Candidatus Carsonella 135557 - 167442nt<br>SARS-CoV-2 Reference Genome NC_045512.2 | (86703) | 86703                                                                          | 86713 | 86724 | 86735 | 86746 | 86757 | 86768 | 86779        |
|                                                                                                                                            | (86703) | ATTTATTTTTTTTGAATAATTACTTAACAAATTTATAATAAAATTTATTATAAAAACCACATTTTAAAAATGATTTTA |       |       |       |       |       |       |              |
|                                                                                                                                            | (1)     | -----                                                                          |       |       |       |       |       |       |              |
|                                                                                                                                            | (1)     | -----                                                                          |       |       |       |       |       |       |              |
|                                                                                                                                            |         |                                                                                |       |       |       |       |       |       | Section 1128 |
| Candidatus Carsonella ruddii strain BT chromosome...<br>Candidatus Carsonella 135557 - 167442nt<br>SARS-CoV-2 Reference Genome NC_045512.2 | (86780) | 86780                                                                          | 86790 | 86801 | 86812 | 86823 | 86834 | 86845 | 86856        |
|                                                                                                                                            | (86780) | TATGAAAATTTTTTCATGTTTTAAAAAATAAAATTTATATAGGTAATAAAATTGAAAAAGAAATAATTTATTAAAAA  |       |       |       |       |       |       |              |
|                                                                                                                                            | (1)     | -----                                                                          |       |       |       |       |       |       |              |
|                                                                                                                                            | (1)     | -----                                                                          |       |       |       |       |       |       |              |

|                                                      |         |                                                                                |       |       |       |       |       |       |       |
|------------------------------------------------------|---------|--------------------------------------------------------------------------------|-------|-------|-------|-------|-------|-------|-------|
| Section 1129                                         |         |                                                                                |       |       |       |       |       |       |       |
| Candidatus Carsonella ruddii strain BT chromosome... | (86857) | 86857                                                                          | 86867 | 86878 | 86889 | 86900 | 86911 | 86922 | 86933 |
| Candidatus Carsonella 135557 - 167442nt              | (86857) | ATTTTTTAGTAGCAAACATTAATAAATTTAATATTATAAATGTTAAAAAAATTTCAATAAAGTTATTTTTATATAAA  |       |       |       |       |       |       |       |
| SARS-CoV-2 Reference Genome NC_045512.2              | (1)     | -----                                                                          |       |       |       |       |       |       |       |
|                                                      | (1)     | -----                                                                          |       |       |       |       |       |       |       |
| Section 1130                                         |         |                                                                                |       |       |       |       |       |       |       |
| Candidatus Carsonella ruddii strain BT chromosome... | (86934) | 86934                                                                          | 86944 | 86955 | 86966 | 86977 | 86988 | 86999 | 87010 |
| Candidatus Carsonella 135557 - 167442nt              | (86934) | AAATATTTACAAAAAATTTTTTTTGAAAAAAAAAAAAATTTTATTATAAGTACAAAAAATTTTTTAAGAGAAATTAT  |       |       |       |       |       |       |       |
| SARS-CoV-2 Reference Genome NC_045512.2              | (1)     | -----                                                                          |       |       |       |       |       |       |       |
|                                                      | (1)     | -----                                                                          |       |       |       |       |       |       |       |
| Section 1131                                         |         |                                                                                |       |       |       |       |       |       |       |
| Candidatus Carsonella ruddii strain BT chromosome... | (87011) | 87011                                                                          | 87021 | 87032 | 87043 | 87054 | 87065 | 87076 | 87087 |
| Candidatus Carsonella 135557 - 167442nt              | (87011) | TTATAAATATGCAAAAAGTTTACAACAATATTTTATTTCACAAAATGGATAGCTGGAACTTTAACAAATTCATAA    |       |       |       |       |       |       |       |
| SARS-CoV-2 Reference Genome NC_045512.2              | (1)     | -----                                                                          |       |       |       |       |       |       |       |
|                                                      | (1)     | -----                                                                          |       |       |       |       |       |       |       |
| Section 1132                                         |         |                                                                                |       |       |       |       |       |       |       |
| Candidatus Carsonella ruddii strain BT chromosome... | (87088) | 87088                                                                          | 87098 | 87109 | 87120 | 87131 | 87142 | 87153 | 87164 |
| Candidatus Carsonella 135557 - 167442nt              | (87088) | ATTATAAAAAAATGTTAAATAAATCTATTTATTTAAAAAAAAAAAAACAAAAAATGAATTTTACAAAAAAGAAAAAAT |       |       |       |       |       |       |       |
| SARS-CoV-2 Reference Genome NC_045512.2              | (1)     | -----                                                                          |       |       |       |       |       |       |       |
|                                                      | (1)     | -----                                                                          |       |       |       |       |       |       |       |
| Section 1133                                         |         |                                                                                |       |       |       |       |       |       |       |
| Candidatus Carsonella ruddii strain BT chromosome... | (87165) | 87165                                                                          | 87175 | 87186 | 87197 | 87208 | 87219 | 87230 | 87241 |
| Candidatus Carsonella 135557 - 167442nt              | (87165) | ATGTTTTTTAAAAGAAGAATTAAAAATAGAAACAATTTATGGAGGATTAAGAGGAATGGTTGAAAATCCAGATTTAAT |       |       |       |       |       |       |       |
| SARS-CoV-2 Reference Genome NC_045512.2              | (1)     | -----                                                                          |       |       |       |       |       |       |       |
|                                                      | (1)     | -----                                                                          |       |       |       |       |       |       |       |
| Section 1134                                         |         |                                                                                |       |       |       |       |       |       |       |
| Candidatus Carsonella ruddii strain BT chromosome... | (87242) | 87242                                                                          | 87252 | 87263 | 87274 | 87285 | 87296 | 87307 | 87318 |
| Candidatus Carsonella 135557 - 167442nt              | (87242) | AATAATTACTGATATTAAAAAAGATAGAGTTGCAATTAATGAAGCTAAAAAATTAATAATTTTAGCATTGT        |       |       |       |       |       |       |       |
| SARS-CoV-2 Reference Genome NC_045512.2              | (1)     | -----                                                                          |       |       |       |       |       |       |       |
|                                                      | (1)     | -----                                                                          |       |       |       |       |       |       |       |

|                                                      |         |                                                                                 |       |       |       |       |       |       |       |
|------------------------------------------------------|---------|---------------------------------------------------------------------------------|-------|-------|-------|-------|-------|-------|-------|
| Section 1135                                         |         |                                                                                 |       |       |       |       |       |       |       |
| Candidatus Carsonella ruddii strain BT chromosome... | (87319) | 87319                                                                           | 87329 | 87340 | 87351 | 87362 | 87373 | 87384 | 87395 |
| Candidatus Carsonella 135557 - 167442nt              | (87319) | TAGATACAGATGATTCTCCTAAAGGAATTGATTATTTTATTCTTTGTAACAATAATTCAATTATTTGTGTTAAAAAT   |       |       |       |       |       |       |       |
| SARS-CoV-2 Reference Genome NC_045512.2              | (1)     | -----                                                                           |       |       |       |       |       |       |       |
|                                                      | (1)     | -----                                                                           |       |       |       |       |       |       |       |
| Section 1136                                         |         |                                                                                 |       |       |       |       |       |       |       |
| Candidatus Carsonella ruddii strain BT chromosome... | (87396) | 87396                                                                           | 87406 | 87417 | 87428 | 87439 | 87450 | 87461 | 87472 |
| Candidatus Carsonella 135557 - 167442nt              | (87396) | ATATTAAAAATATTATTTAGTGAAATATGTTAAATATAAAATTTAATTTTAAAAATTAAAAAGAATATAATTTCAAT   |       |       |       |       |       |       |       |
| SARS-CoV-2 Reference Genome NC_045512.2              | (1)     | -----                                                                           |       |       |       |       |       |       |       |
|                                                      | (1)     | -----                                                                           |       |       |       |       |       |       |       |
| Section 1137                                         |         |                                                                                 |       |       |       |       |       |       |       |
| Candidatus Carsonella ruddii strain BT chromosome... | (87473) | 87473                                                                           | 87483 | 87494 | 87505 | 87516 | 87527 | 87538 | 87549 |
| Candidatus Carsonella 135557 - 167442nt              | (87473) | ATTGGAAGTTGTAAAAAATTATTGGAAAATAATAATTGGGATTATAAAAAAACTATTTTGTATATAAAAAATAGTTT   |       |       |       |       |       |       |       |
| SARS-CoV-2 Reference Genome NC_045512.2              | (1)     | -----                                                                           |       |       |       |       |       |       |       |
|                                                      | (1)     | -----                                                                           |       |       |       |       |       |       |       |
| Section 1138                                         |         |                                                                                 |       |       |       |       |       |       |       |
| Candidatus Carsonella ruddii strain BT chromosome... | (87550) | 87550                                                                           | 87560 | 87571 | 87582 | 87593 | 87604 | 87615 | 87626 |
| Candidatus Carsonella 135557 - 167442nt              | (87550) | TAAAAAAATTAATTTTACAAATTTTAAATATTATTCTATAATAAATATAGAAAAAAAAAATAAAATTTTATAATTA    |       |       |       |       |       |       |       |
| SARS-CoV-2 Reference Genome NC_045512.2              | (1)     | -----                                                                           |       |       |       |       |       |       |       |
|                                                      | (1)     | -----                                                                           |       |       |       |       |       |       |       |
| Section 1139                                         |         |                                                                                 |       |       |       |       |       |       |       |
| Candidatus Carsonella ruddii strain BT chromosome... | (87627) | 87627                                                                           | 87637 | 87648 | 87659 | 87670 | 87681 | 87692 | 87703 |
| Candidatus Carsonella 135557 - 167442nt              | (87627) | AAATATGTTATAATTCAACTATTATTGATAATTCAACTATTATTGAAAAATTTTAAAAAAAAAATTAATTTTAATAAAA |       |       |       |       |       |       |       |
| SARS-CoV-2 Reference Genome NC_045512.2              | (1)     | -----                                                                           |       |       |       |       |       |       |       |
|                                                      | (1)     | -----                                                                           |       |       |       |       |       |       |       |
| Section 1140                                         |         |                                                                                 |       |       |       |       |       |       |       |
| Candidatus Carsonella ruddii strain BT chromosome... | (87704) | 87704                                                                           | 87714 | 87725 | 87736 | 87747 | 87758 | 87769 | 87780 |
| Candidatus Carsonella 135557 - 167442nt              | (87704) | ATTGATATTAAATTTTAAAAAATGAAATAAATTTATTATCTTTTATATTAAAGATAAAATTTTTTTAAATAAATT     |       |       |       |       |       |       |       |
| SARS-CoV-2 Reference Genome NC_045512.2              | (1)     | -----                                                                           |       |       |       |       |       |       |       |
|                                                      | (1)     | -----                                                                           |       |       |       |       |       |       |       |

## SARS-CoV-2 &amp; Bakterien.apr

|                                                      |         |                                                                                 |       |       |       |       |       |
|------------------------------------------------------|---------|---------------------------------------------------------------------------------|-------|-------|-------|-------|-------|
| Section 1141                                         |         |                                                                                 |       |       |       |       |       |
| Candidatus Carsonella ruddii strain BT chromosome... | (87781) | 87781                                                                           | 87791 | 87802 | 87813 | 87824 | 87835 |
| Candidatus Carsonella 135557 - 167442nt              | (87781) | TTTTATTTTATAAAATAAAAAATATTTTTTTTTTATAATCATAAAAATATTTTTTTTGTATAATAATTATAAAAAAT   |       |       |       |       |       |
| SARS-CoV-2 Reference Genome NC_045512.2              | (1)     | -----                                                                           |       |       |       |       |       |
|                                                      | (1)     | -----                                                                           |       |       |       |       |       |
| Section 1142                                         |         |                                                                                 |       |       |       |       |       |
| Candidatus Carsonella ruddii strain BT chromosome... | (87858) | 87858                                                                           | 87868 | 87879 | 87890 | 87901 | 87912 |
| Candidatus Carsonella 135557 - 167442nt              | (87858) | TAATTTTAAATATTTGTTGTCATATAATATTCAAAAAGATTAATTTTTTTAATTTAAATATTTGTAAAAATAATTTG   |       |       |       |       |       |
| SARS-CoV-2 Reference Genome NC_045512.2              | (1)     | -----                                                                           |       |       |       |       |       |
|                                                      | (1)     | -----                                                                           |       |       |       |       |       |
| Section 1143                                         |         |                                                                                 |       |       |       |       |       |
| Candidatus Carsonella ruddii strain BT chromosome... | (87935) | 87935                                                                           | 87945 | 87956 | 87967 | 87978 | 87989 |
| Candidatus Carsonella 135557 - 167442nt              | (87935) | ATGAAACAAAAATATATAAAAAACGAAACATTATTTATTAATGATATAATCAAAAAATAATTTTATAAATTATATTTT  |       |       |       |       |       |
| SARS-CoV-2 Reference Genome NC_045512.2              | (1)     | -----                                                                           |       |       |       |       |       |
|                                                      | (1)     | -----                                                                           |       |       |       |       |       |
| Section 1144                                         |         |                                                                                 |       |       |       |       |       |
| Candidatus Carsonella ruddii strain BT chromosome... | (88012) | 88012                                                                           | 88022 | 88033 | 88044 | 88055 | 88066 |
| Candidatus Carsonella 135557 - 167442nt              | (88012) | TTTAATAAATAAAAAATAATATATATTTTTTATTATGAATAATTTTAATATTTTTCAAGAAATATTAAATAATTATAAT |       |       |       |       |       |
| SARS-CoV-2 Reference Genome NC_045512.2              | (1)     | -----                                                                           |       |       |       |       |       |
|                                                      | (1)     | -----                                                                           |       |       |       |       |       |
| Section 1145                                         |         |                                                                                 |       |       |       |       |       |
| Candidatus Carsonella ruddii strain BT chromosome... | (88089) | 88089                                                                           | 88099 | 88110 | 88121 | 88132 | 88143 |
| Candidatus Carsonella 135557 - 167442nt              | (88089) | TTTTTATTTAAAAATTTAACATTAAAAATTTAGGAATTTAAACATTAAGTAATTTAAAAATAAATATTAATAAAAC    |       |       |       |       |       |
| SARS-CoV-2 Reference Genome NC_045512.2              | (1)     | -----                                                                           |       |       |       |       |       |
|                                                      | (1)     | -----                                                                           |       |       |       |       |       |
| Section 1146                                         |         |                                                                                 |       |       |       |       |       |
| Candidatus Carsonella ruddii strain BT chromosome... | (88166) | 88166                                                                           | 88176 | 88187 | 88198 | 88209 | 88220 |
| Candidatus Carsonella 135557 - 167442nt              | (88166) | ATATTTTAAATTTAGAAAATATTTGTATTATTAAAAATATTAATGATAATAATTATTTATTACAATTTAAAGATACAA  |       |       |       |       |       |
| SARS-CoV-2 Reference Genome NC_045512.2              | (1)     | -----                                                                           |       |       |       |       |       |
|                                                      | (1)     | -----                                                                           |       |       |       |       |       |

## SARS-CoV-2 &amp; Bakterien.apr

|                                                      |         |                                                                                |       |       |       |       |       |       |              |
|------------------------------------------------------|---------|--------------------------------------------------------------------------------|-------|-------|-------|-------|-------|-------|--------------|
|                                                      |         |                                                                                |       |       |       |       |       |       | Section 1147 |
| Candidatus Carsonella ruddii strain BT chromosome... | (88243) | 88243                                                                          | 88253 | 88264 | 88275 | 88286 | 88297 | 88308 | 88319        |
|                                                      | (88243) | ACTTACTAAAACAAATAATTAAAAAAATTTTTTTGAAAATTATGGTTTTCAAATAAAACAATCAAAAAATAATTTA   |       |       |       |       |       |       |              |
|                                                      | (1)     | -----                                                                          |       |       |       |       |       |       |              |
|                                                      | (1)     | -----                                                                          |       |       |       |       |       |       |              |
| Candidatus Carsonella 135557 - 167442nt              | (1)     |                                                                                |       |       |       |       |       |       |              |
| SARS-CoV-2 Reference Genome NC_045512.2              | (1)     |                                                                                |       |       |       |       |       |       |              |
|                                                      |         |                                                                                |       |       |       |       |       |       | Section 1148 |
| Candidatus Carsonella ruddii strain BT chromosome... | (88320) | 88320                                                                          | 88330 | 88341 | 88352 | 88363 | 88374 | 88385 | 88396        |
|                                                      | (88320) | GAATTAATAATTCCAAAATTAAGTGTAGAATTTAGAAATAATGTATTAAAAATTTTAAAAAATGAATATTTTCATTCA |       |       |       |       |       |       |              |
|                                                      | (1)     | -----                                                                          |       |       |       |       |       |       |              |
|                                                      | (1)     | -----                                                                          |       |       |       |       |       |       |              |
| Candidatus Carsonella 135557 - 167442nt              | (1)     |                                                                                |       |       |       |       |       |       |              |
| SARS-CoV-2 Reference Genome NC_045512.2              | (1)     |                                                                                |       |       |       |       |       |       |              |
|                                                      |         |                                                                                |       |       |       |       |       |       | Section 1149 |
| Candidatus Carsonella ruddii strain BT chromosome... | (88397) | 88397                                                                          | 88407 | 88418 | 88429 | 88440 | 88451 | 88462 | 88473        |
|                                                      | (88397) | CAAAGATAATATTGAAAATTATAGAAAAAAATTTTTATTAAATATAAAAAGAAATTTTAAGAGTATAGATGAAATAA  |       |       |       |       |       |       |              |
|                                                      | (1)     | -----                                                                          |       |       |       |       |       |       |              |
|                                                      | (1)     | -----                                                                          |       |       |       |       |       |       |              |
| Candidatus Carsonella 135557 - 167442nt              | (1)     |                                                                                |       |       |       |       |       |       |              |
| SARS-CoV-2 Reference Genome NC_045512.2              | (1)     |                                                                                |       |       |       |       |       |       |              |
|                                                      |         |                                                                                |       |       |       |       |       |       | Section 1150 |
| Candidatus Carsonella ruddii strain BT chromosome... | (88474) | 88474                                                                          | 88484 | 88495 | 88506 | 88517 | 88528 | 88539 | 88550        |
|                                                      | (88474) | ATAATTTAGAAAAAAATTAATAAGAAATTTTGTGTTTGTAAAAATAAATTAAAAAATTTATTTGAAAATTTTTCT    |       |       |       |       |       |       |              |
|                                                      | (1)     | -----                                                                          |       |       |       |       |       |       |              |
|                                                      | (1)     | -----                                                                          |       |       |       |       |       |       |              |
| Candidatus Carsonella 135557 - 167442nt              | (1)     |                                                                                |       |       |       |       |       |       |              |
| SARS-CoV-2 Reference Genome NC_045512.2              | (1)     |                                                                                |       |       |       |       |       |       |              |
|                                                      |         |                                                                                |       |       |       |       |       |       | Section 1151 |
| Candidatus Carsonella ruddii strain BT chromosome... | (88551) | 88551                                                                          | 88561 | 88572 | 88583 | 88594 | 88605 | 88616 | 88627        |
|                                                      | (88551) | AATAAAATATTAAATGAATAATTTTACTCATTTAAATTTACATACTGAATATTCATTTATAGATAGTATAATTAAAG  |       |       |       |       |       |       |              |
|                                                      | (1)     | -----                                                                          |       |       |       |       |       |       |              |
|                                                      | (1)     | -----                                                                          |       |       |       |       |       |       |              |
| Candidatus Carsonella 135557 - 167442nt              | (1)     |                                                                                |       |       |       |       |       |       |              |
| SARS-CoV-2 Reference Genome NC_045512.2              | (1)     |                                                                                |       |       |       |       |       |       |              |
|                                                      |         |                                                                                |       |       |       |       |       |       | Section 1152 |
| Candidatus Carsonella ruddii strain BT chromosome... | (88628) | 88628                                                                          | 88638 | 88649 | 88660 | 88671 | 88682 | 88693 | 88704        |
|                                                      | (88628) | TTGGACAAATTATAGCGTTATATAAAGAGTATAAAATTAATACGATTTGTGTTACTGATTTATTATCAATGTCTTCA  |       |       |       |       |       |       |              |
|                                                      | (1)     | -----                                                                          |       |       |       |       |       |       |              |
|                                                      | (1)     | -----                                                                          |       |       |       |       |       |       |              |
| Candidatus Carsonella 135557 - 167442nt              | (1)     |                                                                                |       |       |       |       |       |       |              |
| SARS-CoV-2 Reference Genome NC_045512.2              | (1)     |                                                                                |       |       |       |       |       |       |              |



|                                                      |         |                                                                                  |       |       |       |       |       |              |
|------------------------------------------------------|---------|----------------------------------------------------------------------------------|-------|-------|-------|-------|-------|--------------|
|                                                      |         |                                                                                  |       |       |       |       |       | Section 1153 |
| Candidatus Carsonella ruddii strain BT chromosome... | (88705) | 88705                                                                            | 88715 | 88726 | 88737 | 88748 | 88759 | 88770 88781  |
|                                                      | (88705) | TTTTATGAATATTATTTTTTTTTGTTATGATAATAATGTAAACCTTTAATAGGTACAGAATGTTTTATTTTACATAA    |       |       |       |       |       |              |
|                                                      | (1)     | -----                                                                            |       |       |       |       |       |              |
| Candidatus Carsonella 135557 - 167442nt              | (1)     | -----                                                                            |       |       |       |       |       |              |
| SARS-CoV-2 Reference Genome NC_045512.2              | (1)     | -----                                                                            |       |       |       |       |       |              |
|                                                      |         |                                                                                  |       |       |       |       |       | Section 1154 |
| Candidatus Carsonella ruddii strain BT chromosome... | (88782) | 88782                                                                            | 88792 | 88803 | 88814 | 88825 | 88836 | 88847 88858  |
|                                                      | (88782) | TGGTAATATTTTAGGTTGTATTTTATTAGCAAAAAATTTTGAAGGATATAAAGAAATTATGCATATTTTATCAAATG    |       |       |       |       |       |              |
|                                                      | (1)     | -----                                                                            |       |       |       |       |       |              |
| Candidatus Carsonella 135557 - 167442nt              | (1)     | -----                                                                            |       |       |       |       |       |              |
| SARS-CoV-2 Reference Genome NC_045512.2              | (1)     | -----                                                                            |       |       |       |       |       |              |
|                                                      |         |                                                                                  |       |       |       |       |       | Section 1155 |
| Candidatus Carsonella ruddii strain BT chromosome... | (88859) | 88859                                                                            | 88869 | 88880 | 88891 | 88902 | 88913 | 88924 88935  |
|                                                      | (88859) | CTTGGAGATATGGTAATATAAATAATGGTGTATTTTATTAAAAATACAATGGATATTAAATTTTAATAAAAAATTTAATA |       |       |       |       |       |              |
|                                                      | (1)     | -----                                                                            |       |       |       |       |       |              |
| Candidatus Carsonella 135557 - 167442nt              | (1)     | -----                                                                            |       |       |       |       |       |              |
| SARS-CoV-2 Reference Genome NC_045512.2              | (1)     | -----                                                                            |       |       |       |       |       |              |
|                                                      |         |                                                                                  |       |       |       |       |       | Section 1156 |
| Candidatus Carsonella ruddii strain BT chromosome... | (88936) | 88936                                                                            | 88946 | 88957 | 88968 | 88979 | 88990 | 89001 89012  |
|                                                      | (88936) | ATTATTTTAAATATTAGATATTATTTTTTTATCAGAATTTAGTTTTATTAAACAAGAATTTATTTTTTTAATAAAATA   |       |       |       |       |       |              |
|                                                      | (1)     | -----                                                                            |       |       |       |       |       |              |
| Candidatus Carsonella 135557 - 167442nt              | (1)     | -----                                                                            |       |       |       |       |       |              |
| SARS-CoV-2 Reference Genome NC_045512.2              | (1)     | -----                                                                            |       |       |       |       |       |              |
|                                                      |         |                                                                                  |       |       |       |       |       | Section 1157 |
| Candidatus Carsonella ruddii strain BT chromosome... | (89013) | 89013                                                                            | 89023 | 89034 | 89045 | 89056 | 89067 | 89078 89089  |
|                                                      | (89013) | TATTTTATTTTATTTGAAAATGATTGTTATTTTGAATTAATAAAGTAAATTTACCTTTTGAAGATTATATTAATA      |       |       |       |       |       |              |
|                                                      | (1)     | -----                                                                            |       |       |       |       |       |              |
| Candidatus Carsonella 135557 - 167442nt              | (1)     | -----                                                                            |       |       |       |       |       |              |
| SARS-CoV-2 Reference Genome NC_045512.2              | (1)     | -----                                                                            |       |       |       |       |       |              |
|                                                      |         |                                                                                  |       |       |       |       |       | Section 1158 |
| Candidatus Carsonella ruddii strain BT chromosome... | (89090) | 89090                                                                            | 89100 | 89111 | 89122 | 89133 | 89144 | 89155 89166  |
|                                                      | (89090) | ATAAAATTTTTTTTTTATTCAAAAAATTTAAATTAATTAATAGCTACTAATAGTGTTAAGTTTTTATTCAAAAT       |       |       |       |       |       |              |
|                                                      | (1)     | -----                                                                            |       |       |       |       |       |              |
| Candidatus Carsonella 135557 - 167442nt              | (1)     | -----                                                                            |       |       |       |       |       |              |
| SARS-CoV-2 Reference Genome NC_045512.2              | (1)     | -----                                                                            |       |       |       |       |       |              |

|                                                      |         |                                                                                |       |       |       |       |       |       |              |
|------------------------------------------------------|---------|--------------------------------------------------------------------------------|-------|-------|-------|-------|-------|-------|--------------|
|                                                      |         |                                                                                |       |       |       |       |       |       | Section 1159 |
| Candidatus Carsonella ruddii strain BT chromosome... | (89167) | 89167                                                                          | 89177 | 89188 | 89199 | 89210 | 89221 | 89232 | 89243        |
|                                                      | (89167) | GATTATGCTTCTAGTATTGGAAAAATTTTATTAAATCAAGAAGATTTAGATGATAATGAATTATATTTTGAATATAC  |       |       |       |       |       |       |              |
|                                                      | (1)     | -----                                                                          |       |       |       |       |       |       |              |
|                                                      | (1)     | -----                                                                          |       |       |       |       |       |       |              |
| Candidatus Carsonella 135557 - 167442nt              | (1)     |                                                                                |       |       |       |       |       |       |              |
| SARS-CoV-2 Reference Genome NC_045512.2              | (1)     |                                                                                |       |       |       |       |       |       |              |
|                                                      |         |                                                                                |       |       |       |       |       |       | Section 1160 |
| Candidatus Carsonella ruddii strain BT chromosome... | (89244) | 89244                                                                          | 89254 | 89265 | 89276 | 89287 | 89298 | 89309 | 89320        |
|                                                      | (89244) | TGATAAACAAATATTTAAAAAATTATTTTGAATGAAAAAAATTTTCAAAATAATTTAGAATGTTTAAATAACATTC   |       |       |       |       |       |       |              |
|                                                      | (1)     | -----                                                                          |       |       |       |       |       |       |              |
|                                                      | (1)     | -----                                                                          |       |       |       |       |       |       |              |
| Candidatus Carsonella 135557 - 167442nt              | (1)     |                                                                                |       |       |       |       |       |       |              |
| SARS-CoV-2 Reference Genome NC_045512.2              | (1)     |                                                                                |       |       |       |       |       |       |              |
|                                                      |         |                                                                                |       |       |       |       |       |       | Section 1161 |
| Candidatus Carsonella ruddii strain BT chromosome... | (89321) | 89321                                                                          | 89331 | 89342 | 89353 | 89364 | 89375 | 89386 | 89397        |
|                                                      | (89321) | AAATTATTATTAATGATTGTAATATAAAATTTTAAATGTTATGGTTTTAATTTGCCTAAAATTAAAATTGAAAAATTT |       |       |       |       |       |       |              |
|                                                      | (1)     | -----                                                                          |       |       |       |       |       |       |              |
|                                                      | (1)     | -----                                                                          |       |       |       |       |       |       |              |
| Candidatus Carsonella 135557 - 167442nt              | (1)     |                                                                                |       |       |       |       |       |       |              |
| SARS-CoV-2 Reference Genome NC_045512.2              | (1)     |                                                                                |       |       |       |       |       |       |              |
|                                                      |         |                                                                                |       |       |       |       |       |       | Section 1162 |
| Candidatus Carsonella ruddii strain BT chromosome... | (89398) | 89398                                                                          | 89408 | 89419 | 89430 | 89441 | 89452 | 89463 | 89474        |
|                                                      | (89398) | TCAATAAGAAAAAAAAATTTTAAACAATTTATTAAAAAAGGTATTAAAAACAGAATTATTAAAAAAGAAAAA       |       |       |       |       |       |       |              |
|                                                      | (1)     | -----                                                                          |       |       |       |       |       |       |              |
|                                                      | (1)     | -----                                                                          |       |       |       |       |       |       |              |
| Candidatus Carsonella 135557 - 167442nt              | (1)     |                                                                                |       |       |       |       |       |       |              |
| SARS-CoV-2 Reference Genome NC_045512.2              | (1)     |                                                                                |       |       |       |       |       |       |              |
|                                                      |         |                                                                                |       |       |       |       |       |       | Section 1163 |
| Candidatus Carsonella ruddii strain BT chromosome... | (89475) | 89475                                                                          | 89485 | 89496 | 89507 | 89518 | 89529 | 89540 | 89551        |
|                                                      | (89475) | ATTTTACCATATATAAATAGAATAAATAAAGAACTATTTTAAATTAATAAATAATGGGTTTGATAGATTATTTTTTAA |       |       |       |       |       |       |              |
|                                                      | (1)     | -----                                                                          |       |       |       |       |       |       |              |
|                                                      | (1)     | -----                                                                          |       |       |       |       |       |       |              |
| Candidatus Carsonella 135557 - 167442nt              | (1)     |                                                                                |       |       |       |       |       |       |              |
| SARS-CoV-2 Reference Genome NC_045512.2              | (1)     |                                                                                |       |       |       |       |       |       |              |
|                                                      |         |                                                                                |       |       |       |       |       |       | Section 1164 |
| Candidatus Carsonella ruddii strain BT chromosome... | (89552) | 89552                                                                          | 89562 | 89573 | 89584 | 89595 | 89606 | 89617 | 89628        |
|                                                      | (89552) | TAATTTATGAATTTATTTTTTGGTCAAAAAAAAAAATATTCCTTCTGGACCAGGAAGAGGTTCTGGAGCTTCATCT   |       |       |       |       |       |       |              |
|                                                      | (1)     | -----                                                                          |       |       |       |       |       |       |              |
|                                                      | (1)     | -----                                                                          |       |       |       |       |       |       |              |
| Candidatus Carsonella 135557 - 167442nt              | (1)     |                                                                                |       |       |       |       |       |       |              |
| SARS-CoV-2 Reference Genome NC_045512.2              | (1)     |                                                                                |       |       |       |       |       |       |              |

|                                                      |         |                                                                                |       |       |       |       |       |       |       |
|------------------------------------------------------|---------|--------------------------------------------------------------------------------|-------|-------|-------|-------|-------|-------|-------|
| Section 1165                                         |         |                                                                                |       |       |       |       |       |       |       |
| Candidatus Carsonella ruddii strain BT chromosome... | (89629) | 89629                                                                          | 89639 | 89650 | 89661 | 89672 | 89683 | 89694 | 89705 |
|                                                      | (89629) | TTAGTTTGTTATTCTTTGTATATAACAGATATAGATCCAGTAAATGAAAATTTATTATTTGAAAGATTTTTTAACATC |       |       |       |       |       |       |       |
|                                                      | (1)     | -----                                                                          |       |       |       |       |       |       |       |
|                                                      | (1)     | -----                                                                          |       |       |       |       |       |       |       |
| Candidatus Carsonella 135557 - 167442nt              | (1)     | -----                                                                          |       |       |       |       |       |       |       |
| SARS-CoV-2 Reference Genome NC_045512.2              | (1)     | -----                                                                          |       |       |       |       |       |       |       |
| Section 1166                                         |         |                                                                                |       |       |       |       |       |       |       |
| Candidatus Carsonella ruddii strain BT chromosome... | (89706) | 89706                                                                          | 89716 | 89727 | 89738 | 89749 | 89760 | 89771 | 89782 |
|                                                      | (89706) | TGAAAGATTTAGTATGCCTGATTTAGATTTAGATTTTTGTGTTTTAGAAAGAGACGCATTAATTGATCATATGTTTG  |       |       |       |       |       |       |       |
|                                                      | (1)     | -----                                                                          |       |       |       |       |       |       |       |
|                                                      | (1)     | -----                                                                          |       |       |       |       |       |       |       |
| Candidatus Carsonella 135557 - 167442nt              | (1)     | -----                                                                          |       |       |       |       |       |       |       |
| SARS-CoV-2 Reference Genome NC_045512.2              | (1)     | -----                                                                          |       |       |       |       |       |       |       |
| Section 1167                                         |         |                                                                                |       |       |       |       |       |       |       |
| Candidatus Carsonella ruddii strain BT chromosome... | (89783) | 89783                                                                          | 89793 | 89804 | 89815 | 89826 | 89837 | 89848 | 89859 |
|                                                      | (89783) | AGTATTATAATTATAATAATACATCACAAATAATAACATTTTCATAATTTATCTACAAAATCTTTAATAAGAGATTTA |       |       |       |       |       |       |       |
|                                                      | (1)     | -----                                                                          |       |       |       |       |       |       |       |
|                                                      | (1)     | -----                                                                          |       |       |       |       |       |       |       |
| Candidatus Carsonella 135557 - 167442nt              | (1)     | -----                                                                          |       |       |       |       |       |       |       |
| SARS-CoV-2 Reference Genome NC_045512.2              | (1)     | -----                                                                          |       |       |       |       |       |       |       |
| Section 1168                                         |         |                                                                                |       |       |       |       |       |       |       |
| Candidatus Carsonella ruddii strain BT chromosome... | (89860) | 89860                                                                          | 89870 | 89881 | 89892 | 89903 | 89914 | 89925 | 89936 |
|                                                      | (89860) | TCTAGAGCAATAGGTTTAGACTATTTATCTGGTGATAGATTTTCTAAATCAATTCCTTTTCTTTAGAATTATCGAT   |       |       |       |       |       |       |       |
|                                                      | (1)     | -----                                                                          |       |       |       |       |       |       |       |
|                                                      | (1)     | -----                                                                          |       |       |       |       |       |       |       |
| Candidatus Carsonella 135557 - 167442nt              | (1)     | -----                                                                          |       |       |       |       |       |       |       |
| SARS-CoV-2 Reference Genome NC_045512.2              | (1)     | -----                                                                          |       |       |       |       |       |       |       |
| Section 1169                                         |         |                                                                                |       |       |       |       |       |       |       |
| Candidatus Carsonella ruddii strain BT chromosome... | (89937) | 89937                                                                          | 89947 | 89958 | 89969 | 89980 | 89991 | 90002 | 90013 |
|                                                      | (89937) | GGAAGATATCTTTAGAAAAAGTTTATCAGTTAGAAGTTATGTTTCAAGTAACGAAAAAAGTTTAGATATATGGAAAA  |       |       |       |       |       |       |       |
|                                                      | (1)     | -----                                                                          |       |       |       |       |       |       |       |
|                                                      | (1)     | -----                                                                          |       |       |       |       |       |       |       |
| Candidatus Carsonella 135557 - 167442nt              | (1)     | -----                                                                          |       |       |       |       |       |       |       |
| SARS-CoV-2 Reference Genome NC_045512.2              | (1)     | -----                                                                          |       |       |       |       |       |       |       |
| Section 1170                                         |         |                                                                                |       |       |       |       |       |       |       |
| Candidatus Carsonella ruddii strain BT chromosome... | (90014) | 90014                                                                          | 90024 | 90035 | 90046 | 90057 | 90068 | 90079 | 90090 |
|                                                      | (90014) | TATCTACTAAAATTGAAGGTGTATTTAGTAAAAATTGGTAAACATGCTGGAGGAGTTGTTATTGCTAAAAATGGTATT |       |       |       |       |       |       |       |
|                                                      | (1)     | -----                                                                          |       |       |       |       |       |       |       |
|                                                      | (1)     | -----                                                                          |       |       |       |       |       |       |       |
| Candidatus Carsonella 135557 - 167442nt              | (1)     | -----                                                                          |       |       |       |       |       |       |       |
| SARS-CoV-2 Reference Genome NC_045512.2              | (1)     | -----                                                                          |       |       |       |       |       |       |       |

## SARS-CoV-2 &amp; Bakterien.apr

|                                                      |         |                                                                              |       |       |       |       |       |       |              |
|------------------------------------------------------|---------|------------------------------------------------------------------------------|-------|-------|-------|-------|-------|-------|--------------|
|                                                      |         |                                                                              |       |       |       |       |       |       | Section 1171 |
| Candidatus Carsonella ruddii strain BT chromosome... | (90091) | 90091                                                                        | 90101 | 90112 | 90123 | 90134 | 90145 | 90156 | 90167        |
|                                                      | (90091) | TATAATATTACTCCAATTATGTTTGATAATGATGACTGTATTACTCAATATGAAAAAATATTTTACAAGAAATTGG |       |       |       |       |       |       |              |
|                                                      | (1)     | -----                                                                        |       |       |       |       |       |       |              |
|                                                      | (1)     | -----                                                                        |       |       |       |       |       |       |              |
| Candidatus Carsonella 135557 - 167442nt              | (1)     |                                                                              |       |       |       |       |       |       |              |
| SARS-CoV-2 Reference Genome NC_045512.2              | (1)     |                                                                              |       |       |       |       |       |       |              |
|                                                      |         |                                                                              |       |       |       |       |       |       | Section 1172 |
| Candidatus Carsonella ruddii strain BT chromosome... | (90168) | 90168                                                                        | 90178 | 90189 | 90200 | 90211 | 90222 | 90233 | 90244        |
|                                                      | (90168) | TTTATTAAAATTTGATTTTTTAGGATTAAAACTATATCAATTATACATATTTCTTTAAATATGATACCTGAAAAA  |       |       |       |       |       |       |              |
|                                                      | (1)     | -----                                                                        |       |       |       |       |       |       |              |
|                                                      | (1)     | -----                                                                        |       |       |       |       |       |       |              |
| Candidatus Carsonella 135557 - 167442nt              | (1)     |                                                                              |       |       |       |       |       |       |              |
| SARS-CoV-2 Reference Genome NC_045512.2              | (1)     |                                                                              |       |       |       |       |       |       |              |
|                                                      |         |                                                                              |       |       |       |       |       |       | Section 1173 |
| Candidatus Carsonella ruddii strain BT chromosome... | (90245) | 90245                                                                        | 90255 | 90266 | 90277 | 90288 | 90299 | 90310 | 90321        |
|                                                      | (90245) | CAACAGGTGAATTTAATATAGATGATTATCATACATATCAAATGTTGAATAATTTAGAACTGAATTAGTTTTTCAA |       |       |       |       |       |       |              |
|                                                      | (1)     | -----                                                                        |       |       |       |       |       |       |              |
|                                                      | (1)     | -----                                                                        |       |       |       |       |       |       |              |
| Candidatus Carsonella 135557 - 167442nt              | (1)     |                                                                              |       |       |       |       |       |       |              |
| SARS-CoV-2 Reference Genome NC_045512.2              | (1)     |                                                                              |       |       |       |       |       |       |              |
|                                                      |         |                                                                              |       |       |       |       |       |       | Section 1174 |
| Candidatus Carsonella ruddii strain BT chromosome... | (90322) | 90322                                                                        | 90332 | 90343 | 90354 | 90365 | 90376 | 90387 | 90398        |
|                                                      | (90322) | TTAGAATCATATGGAATGAAAAAATGTTAAGAAGATCACCAATTAATAATATTTTTGATATTATTTTATATTTATC |       |       |       |       |       |       |              |
|                                                      | (1)     | -----                                                                        |       |       |       |       |       |       |              |
|                                                      | (1)     | -----                                                                        |       |       |       |       |       |       |              |
| Candidatus Carsonella 135557 - 167442nt              | (1)     |                                                                              |       |       |       |       |       |       |              |
| SARS-CoV-2 Reference Genome NC_045512.2              | (1)     |                                                                              |       |       |       |       |       |       |              |
|                                                      |         |                                                                              |       |       |       |       |       |       | Section 1175 |
| Candidatus Carsonella ruddii strain BT chromosome... | (90399) | 90399                                                                        | 90409 | 90420 | 90431 | 90442 | 90453 | 90464 | 90475        |
|                                                      | (90399) | TTTATTTAGACCAGGACCTATTCAATCAGGATGTGTTAATATTTTTTTAAATAGAAAAATAATTTATTAAAACTT  |       |       |       |       |       |       |              |
|                                                      | (1)     | -----                                                                        |       |       |       |       |       |       |              |
|                                                      | (1)     | -----                                                                        |       |       |       |       |       |       |              |
| Candidatus Carsonella 135557 - 167442nt              | (1)     |                                                                              |       |       |       |       |       |       |              |
| SARS-CoV-2 Reference Genome NC_045512.2              | (1)     |                                                                              |       |       |       |       |       |       |              |
|                                                      |         |                                                                              |       |       |       |       |       |       | Section 1176 |
| Candidatus Carsonella ruddii strain BT chromosome... | (90476) | 90476                                                                        | 90486 | 90497 | 90508 | 90519 | 90530 | 90541 | 90552        |
|                                                      | (90476) | TTTTTCCATATGAAAATAACAATTATTATTTTTTAAAAATTTTTTATCATATACACATGGTATAATGATATTTCAA |       |       |       |       |       |       |              |
|                                                      | (1)     | -----                                                                        |       |       |       |       |       |       |              |
|                                                      | (1)     | -----                                                                        |       |       |       |       |       |       |              |
| Candidatus Carsonella 135557 - 167442nt              | (1)     |                                                                              |       |       |       |       |       |       |              |
| SARS-CoV-2 Reference Genome NC_045512.2              | (1)     |                                                                              |       |       |       |       |       |       |              |

## SARS-CoV-2 &amp; Bakterien.apr

|                                                      |         |                                                                                |       |       |       |       |       |       |       |
|------------------------------------------------------|---------|--------------------------------------------------------------------------------|-------|-------|-------|-------|-------|-------|-------|
|                                                      |         | Section 1177                                                                   |       |       |       |       |       |       |       |
| Candidatus Carsonella ruddii strain BT chromosome... | (90553) | 90553                                                                          | 90563 | 90574 | 90585 | 90596 | 90607 | 90618 | 90629 |
|                                                      | (90553) | GAACAAATAATATTGATTATACATACCTTTTTTTGAATGTACAATATATGATTCTGAAAAAATTTTAAATTCAATGAT |       |       |       |       |       |       |       |
|                                                      | (1)     | -----                                                                          |       |       |       |       |       |       |       |
| Candidatus Carsonella 135557 - 167442nt              | (1)     | -----                                                                          |       |       |       |       |       |       |       |
| SARS-CoV-2 Reference Genome NC_045512.2              | (1)     | -----                                                                          |       |       |       |       |       |       |       |
|                                                      |         | Section 1178                                                                   |       |       |       |       |       |       |       |
| Candidatus Carsonella ruddii strain BT chromosome... | (90630) | 90630                                                                          | 90640 | 90651 | 90662 | 90673 | 90684 | 90695 | 90706 |
|                                                      | (90630) | TTCTAATTCTATTAAAGAATTAAATATTCTCAATAAAATTTTAAAAAAAAAATGTTTAAATTTAATTTATCTGATT   |       |       |       |       |       |       |       |
|                                                      | (1)     | -----                                                                          |       |       |       |       |       |       |       |
| Candidatus Carsonella 135557 - 167442nt              | (1)     | -----                                                                          |       |       |       |       |       |       |       |
| SARS-CoV-2 Reference Genome NC_045512.2              | (1)     | -----                                                                          |       |       |       |       |       |       |       |
|                                                      |         | Section 1179                                                                   |       |       |       |       |       |       |       |
| Candidatus Carsonella ruddii strain BT chromosome... | (90707) | 90707                                                                          | 90717 | 90728 | 90739 | 90750 | 90761 | 90772 | 90783 |
|                                                      | (90707) | ATGAATCTAATGAATTATTTTATTTAATTGTAACCTTTTGCATGTTATAGTTTTAATAGAACTCATGCACATTCATAT |       |       |       |       |       |       |       |
|                                                      | (1)     | -----                                                                          |       |       |       |       |       |       |       |
| Candidatus Carsonella 135557 - 167442nt              | (1)     | -----                                                                          |       |       |       |       |       |       |       |
| SARS-CoV-2 Reference Genome NC_045512.2              | (1)     | -----                                                                          |       |       |       |       |       |       |       |
|                                                      |         | Section 1180                                                                   |       |       |       |       |       |       |       |
| Candidatus Carsonella ruddii strain BT chromosome... | (90784) | 90784                                                                          | 90794 | 90805 | 90816 | 90827 | 90838 | 90849 | 90860 |
|                                                      | (90784) | GCTAAAAATTGTTTATCAAACAGCTTTTTTAAAGCAAATTATTTATTAGAATTTTGTGTTAGCAAATATTTATGTTGA |       |       |       |       |       |       |       |
|                                                      | (1)     | -----                                                                          |       |       |       |       |       |       |       |
| Candidatus Carsonella 135557 - 167442nt              | (1)     | -----                                                                          |       |       |       |       |       |       |       |
| SARS-CoV-2 Reference Genome NC_045512.2              | (1)     | -----                                                                          |       |       |       |       |       |       |       |
|                                                      |         | Section 1181                                                                   |       |       |       |       |       |       |       |
| Candidatus Carsonella ruddii strain BT chromosome... | (90861) | 90861                                                                          | 90871 | 90882 | 90893 | 90904 | 90915 | 90926 | 90937 |
|                                                      | (90861) | TCAATTATTAGGATTTGATTTAGATAGAATTATTTTAAATTTAAAAATTATAGGTGTTTATTTTACAAACCAGACA   |       |       |       |       |       |       |       |
|                                                      | (1)     | -----                                                                          |       |       |       |       |       |       |       |
| Candidatus Carsonella 135557 - 167442nt              | (1)     | -----                                                                          |       |       |       |       |       |       |       |
| SARS-CoV-2 Reference Genome NC_045512.2              | (1)     | -----                                                                          |       |       |       |       |       |       |       |
|                                                      |         | Section 1182                                                                   |       |       |       |       |       |       |       |
| Candidatus Carsonella ruddii strain BT chromosome... | (90938) | 90938                                                                          | 90948 | 90959 | 90970 | 90981 | 90992 | 91003 | 91014 |
|                                                      | (90938) | TTAATATTTCTGATGAAATTTTAAATTTATAAAAAAGGTATTTTATTTGGTTTTCTGTAGTTAAATTTATAGAT     |       |       |       |       |       |       |       |
|                                                      | (1)     | -----                                                                          |       |       |       |       |       |       |       |
| Candidatus Carsonella 135557 - 167442nt              | (1)     | -----                                                                          |       |       |       |       |       |       |       |
| SARS-CoV-2 Reference Genome NC_045512.2              | (1)     | -----                                                                          |       |       |       |       |       |       |       |

## SARS-CoV-2 &amp; Bakterien.apr

|                                                                                                                                            |         |                                                                                 |       |       |       |       |       |       |              |
|--------------------------------------------------------------------------------------------------------------------------------------------|---------|---------------------------------------------------------------------------------|-------|-------|-------|-------|-------|-------|--------------|
|                                                                                                                                            |         |                                                                                 |       |       |       |       |       |       | Section 1183 |
| Candidatus Carsonella ruddii strain BT chromosome...<br>Candidatus Carsonella 135557 - 167442nt<br>SARS-CoV-2 Reference Genome NC_045512.2 | (91015) | 91015                                                                           | 91025 | 91036 | 91047 | 91058 | 91069 | 91080 | 91091        |
|                                                                                                                                            | (91015) | GATTATTTTATAGATAGAATCTTATATTATAGAAATAAAATATTTTTTTATAATAGTTTTGAAATATTTTGTA       |       |       |       |       |       |       |              |
|                                                                                                                                            | (1)     | -----                                                                           |       |       |       |       |       |       |              |
|                                                                                                                                            | (1)     | -----                                                                           |       |       |       |       |       |       |              |
|                                                                                                                                            |         |                                                                                 |       |       |       |       |       |       | Section 1184 |
| Candidatus Carsonella ruddii strain BT chromosome...<br>Candidatus Carsonella 135557 - 167442nt<br>SARS-CoV-2 Reference Genome NC_045512.2 | (91092) | 91092                                                                           | 91102 | 91113 | 91124 | 91135 | 91146 | 91157 | 91168        |
|                                                                                                                                            | (91092) | ATTTAGTATATTTAAAAATTAATAAATAAAAAAGTAATAGAAAATTTAATTTTTTGTGGTTTTTTTGATTGTTATAGAA |       |       |       |       |       |       |              |
|                                                                                                                                            | (1)     | -----                                                                           |       |       |       |       |       |       |              |
|                                                                                                                                            | (1)     | -----                                                                           |       |       |       |       |       |       |              |
|                                                                                                                                            |         |                                                                                 |       |       |       |       |       |       | Section 1185 |
| Candidatus Carsonella ruddii strain BT chromosome...<br>Candidatus Carsonella 135557 - 167442nt<br>SARS-CoV-2 Reference Genome NC_045512.2 | (91169) | 91169                                                                           | 91179 | 91190 | 91201 | 91212 | 91223 | 91234 | 91245        |
|                                                                                                                                            | (91169) | TTAATAGAATATATTTATTTATTAATTTTCAATTTTATATGAAAAATCATTTTATTAAAAAAGAATATAATAGA      |       |       |       |       |       |       |              |
|                                                                                                                                            | (1)     | -----                                                                           |       |       |       |       |       |       |              |
|                                                                                                                                            | (1)     | -----                                                                           |       |       |       |       |       |       |              |
|                                                                                                                                            |         |                                                                                 |       |       |       |       |       |       | Section 1186 |
| Candidatus Carsonella ruddii strain BT chromosome...<br>Candidatus Carsonella 135557 - 167442nt<br>SARS-CoV-2 Reference Genome NC_045512.2 | (91246) | 91246                                                                           | 91256 | 91267 | 91278 | 91289 | 91300 | 91311 | 91322        |
|                                                                                                                                            | (91246) | TCGTTAATTTATAAATTAATAGAATATATTGATTATTCTAAATTATCTATTATAAAATTTAAATTTTAAATGTATA    |       |       |       |       |       |       |              |
|                                                                                                                                            | (1)     | -----                                                                           |       |       |       |       |       |       |              |
|                                                                                                                                            | (1)     | -----                                                                           |       |       |       |       |       |       |              |
|                                                                                                                                            |         |                                                                                 |       |       |       |       |       |       | Section 1187 |
| Candidatus Carsonella ruddii strain BT chromosome...<br>Candidatus Carsonella 135557 - 167442nt<br>SARS-CoV-2 Reference Genome NC_045512.2 | (91323) | 91323                                                                           | 91333 | 91344 | 91355 | 91366 | 91377 | 91388 | 91399        |
|                                                                                                                                            | (91323) | TTATTTAGATTTATTAAATATAGAAAAAAATTTATTAATTTTTCGTTTCTAATCAACCATCTGATTTTTTTATTT     |       |       |       |       |       |       |              |
|                                                                                                                                            | (1)     | -----                                                                           |       |       |       |       |       |       |              |
|                                                                                                                                            | (1)     | -----                                                                           |       |       |       |       |       |       |              |
|                                                                                                                                            |         |                                                                                 |       |       |       |       |       |       | Section 1188 |
| Candidatus Carsonella ruddii strain BT chromosome...<br>Candidatus Carsonella 135557 - 167442nt<br>SARS-CoV-2 Reference Genome NC_045512.2 | (91400) | 91400                                                                           | 91410 | 91421 | 91432 | 91443 | 91454 | 91465 | 91476        |
|                                                                                                                                            | (91400) | CAAAATTTATAGGTCATAATTTATATAATTCAATAAATAGAGTTGAAAAAAAAAAAAATTAATATTTTAATTTCTACA  |       |       |       |       |       |       |              |
|                                                                                                                                            | (1)     | -----                                                                           |       |       |       |       |       |       |              |
|                                                                                                                                            | (1)     | -----                                                                           |       |       |       |       |       |       |              |

|                                                      |         |                                                                                   |       |       |       |       |       |       |              |
|------------------------------------------------------|---------|-----------------------------------------------------------------------------------|-------|-------|-------|-------|-------|-------|--------------|
|                                                      |         |                                                                                   |       |       |       |       |       |       | Section 1189 |
| Candidatus Carsonella ruddii strain BT chromosome... | (91477) | 91477                                                                             | 91487 | 91498 | 91509 | 91520 | 91531 | 91542 | 91553        |
|                                                      | (91477) | CCTAAAAAAAAA CTTTTTTTTT GAAAAACATGTAAATATTTT TAGAATAATTAATAATAATAAAATTAAAGTTTTAGA |       |       |       |       |       |       |              |
|                                                      | (1)     | -----                                                                             |       |       |       |       |       |       |              |
|                                                      | (1)     | -----                                                                             |       |       |       |       |       |       |              |
| Candidatus Carsonella 135557 - 167442nt              | (1)     |                                                                                   |       |       |       |       |       |       |              |
| SARS-CoV-2 Reference Genome NC_045512.2              | (1)     |                                                                                   |       |       |       |       |       |       |              |
|                                                      |         |                                                                                   |       |       |       |       |       |       | Section 1190 |
| Candidatus Carsonella ruddii strain BT chromosome... | (91554) | 91554                                                                             | 91564 | 91575 | 91586 | 91597 | 91608 | 91619 | 91630        |
|                                                      | (91554) | TGTTTTTCTAGATTTTATACCTTTACCTGATATTGAAATACCTTTTAGTTTTTATTATTATATAATAATGAAACAA      |       |       |       |       |       |       |              |
|                                                      | (1)     | -----                                                                             |       |       |       |       |       |       |              |
|                                                      | (1)     | -----                                                                             |       |       |       |       |       |       |              |
| Candidatus Carsonella 135557 - 167442nt              | (1)     |                                                                                   |       |       |       |       |       |       |              |
| SARS-CoV-2 Reference Genome NC_045512.2              | (1)     |                                                                                   |       |       |       |       |       |       |              |
|                                                      |         |                                                                                   |       |       |       |       |       |       | Section 1191 |
| Candidatus Carsonella ruddii strain BT chromosome... | (91631) | 91631                                                                             | 91641 | 91652 | 91663 | 91674 | 91685 | 91696 | 91707        |
|                                                      | (91631) | AAACTAATCAAATTATTAAATGTTATAATATAAAATCATTCTGTTATTCCATAGGATGTGTTTATTATATATATATA     |       |       |       |       |       |       |              |
|                                                      | (1)     | -----                                                                             |       |       |       |       |       |       |              |
|                                                      | (1)     | -----                                                                             |       |       |       |       |       |       |              |
| Candidatus Carsonella 135557 - 167442nt              | (1)     |                                                                                   |       |       |       |       |       |       |              |
| SARS-CoV-2 Reference Genome NC_045512.2              | (1)     |                                                                                   |       |       |       |       |       |       |              |
|                                                      |         |                                                                                   |       |       |       |       |       |       | Section 1192 |
| Candidatus Carsonella ruddii strain BT chromosome... | (91708) | 91708                                                                             | 91718 | 91729 | 91740 | 91751 | 91762 | 91773 | 91784        |
|                                                      | (91708) | AAAAATACTTTAAATTTAAAAAATATTATTTATTTGTTATTTAATAATTTTAAATTTTATCGGTAGCAAAGTTTATAT    |       |       |       |       |       |       |              |
|                                                      | (1)     | -----                                                                             |       |       |       |       |       |       |              |
|                                                      | (1)     | -----                                                                             |       |       |       |       |       |       |              |
| Candidatus Carsonella 135557 - 167442nt              | (1)     |                                                                                   |       |       |       |       |       |       |              |
| SARS-CoV-2 Reference Genome NC_045512.2              | (1)     |                                                                                   |       |       |       |       |       |       |              |
|                                                      |         |                                                                                   |       |       |       |       |       |       | Section 1193 |
| Candidatus Carsonella ruddii strain BT chromosome... | (91785) | 91785                                                                             | 91795 | 91806 | 91817 | 91828 | 91839 | 91850 | 91861        |
|                                                      | (91785) | TAAATATAAAAAATAAAATTTTTTCATCGAAAATTTGTGTTTAAATGGATGAAAAAATAATGTTACATTTAAATTTAT    |       |       |       |       |       |       |              |
|                                                      | (1)     | -----                                                                             |       |       |       |       |       |       |              |
|                                                      | (1)     | -----                                                                             |       |       |       |       |       |       |              |
| Candidatus Carsonella 135557 - 167442nt              | (1)     |                                                                                   |       |       |       |       |       |       |              |
| SARS-CoV-2 Reference Genome NC_045512.2              | (1)     |                                                                                   |       |       |       |       |       |       |              |
|                                                      |         |                                                                                   |       |       |       |       |       |       | Section 1194 |
| Candidatus Carsonella ruddii strain BT chromosome... | (91862) | 91862                                                                             | 91872 | 91883 | 91894 | 91905 | 91916 | 91927 | 91938        |
|                                                      | (91862) | TTGATATTACTAAATAGTTTGTGTTTACATGTATTAAATGAAAAATTTATTTTAAATAAAAAATATTTATTTATATT     |       |       |       |       |       |       |              |
|                                                      | (1)     | -----                                                                             |       |       |       |       |       |       |              |
|                                                      | (1)     | -----                                                                             |       |       |       |       |       |       |              |
| Candidatus Carsonella 135557 - 167442nt              | (1)     |                                                                                   |       |       |       |       |       |       |              |
| SARS-CoV-2 Reference Genome NC_045512.2              | (1)     |                                                                                   |       |       |       |       |       |       |              |

## SARS-CoV-2 &amp; Bakterien.apr

|                                                      |         |                                                                                  |       |       |       |       |       |       |       |
|------------------------------------------------------|---------|----------------------------------------------------------------------------------|-------|-------|-------|-------|-------|-------|-------|
|                                                      |         | Section 1195                                                                     |       |       |       |       |       |       |       |
| Candidatus Carsonella ruddii strain BT chromosome... | (91939) | 91939                                                                            | 91949 | 91960 | 91971 | 91982 | 91993 | 92004 | 92015 |
|                                                      | (91939) | TTTCATTTGGTAAAGATAGTTATTATTCATTATTTAATTTTTTTTATAAAAAAAAAAAAAATTATTTTTTACAATTAT   |       |       |       |       |       |       |       |
|                                                      | (1)     | -----                                                                            |       |       |       |       |       |       |       |
| Candidatus Carsonella 135557 - 167442nt              | (1)     | -----                                                                            |       |       |       |       |       |       |       |
| SARS-CoV-2 Reference Genome NC_045512.2              | (1)     | -----                                                                            |       |       |       |       |       |       |       |
|                                                      |         | Section 1196                                                                     |       |       |       |       |       |       |       |
| Candidatus Carsonella ruddii strain BT chromosome... | (92016) | 92016                                                                            | 92026 | 92037 | 92048 | 92059 | 92070 | 92081 | 92092 |
|                                                      | (92016) | AATAAAAAAAAAATATTTTTAAAAAATAAATACAAATTCCTTTTATTTTTTTATAAAAAATTTTCTAAAAATGAATT    |       |       |       |       |       |       |       |
|                                                      | (1)     | -----                                                                            |       |       |       |       |       |       |       |
| Candidatus Carsonella 135557 - 167442nt              | (1)     | -----                                                                            |       |       |       |       |       |       |       |
| SARS-CoV-2 Reference Genome NC_045512.2              | (1)     | -----                                                                            |       |       |       |       |       |       |       |
|                                                      |         | Section 1197                                                                     |       |       |       |       |       |       |       |
| Candidatus Carsonella ruddii strain BT chromosome... | (92093) | 92093                                                                            | 92103 | 92114 | 92125 | 92136 | 92147 | 92158 | 92169 |
|                                                      | (92093) | ATTATTAAGAAGAAGACTAGATTTTTTAATCAAAAAAAAAAATATTTTTTTTATAAAAAATCATCATTTAATAGATAAAA |       |       |       |       |       |       |       |
|                                                      | (1)     | -----                                                                            |       |       |       |       |       |       |       |
| Candidatus Carsonella 135557 - 167442nt              | (1)     | -----                                                                            |       |       |       |       |       |       |       |
| SARS-CoV-2 Reference Genome NC_045512.2              | (1)     | -----                                                                            |       |       |       |       |       |       |       |
|                                                      |         | Section 1198                                                                     |       |       |       |       |       |       |       |
| Candidatus Carsonella ruddii strain BT chromosome... | (92170) | 92170                                                                            | 92180 | 92191 | 92202 | 92213 | 92224 | 92235 | 92246 |
|                                                      | (92170) | TTGAATTTTTAATTTTTTAAATTTTTTAAAAAAAAAATTTTTTTTAAATTATAATAATATATGGATTAAATAAAAAAAT  |       |       |       |       |       |       |       |
|                                                      | (1)     | -----                                                                            |       |       |       |       |       |       |       |
| Candidatus Carsonella 135557 - 167442nt              | (1)     | -----                                                                            |       |       |       |       |       |       |       |
| SARS-CoV-2 Reference Genome NC_045512.2              | (1)     | -----                                                                            |       |       |       |       |       |       |       |
|                                                      |         | Section 1199                                                                     |       |       |       |       |       |       |       |
| Candidatus Carsonella ruddii strain BT chromosome... | (92247) | 92247                                                                            | 92257 | 92268 | 92279 | 92290 | 92301 | 92312 | 92323 |
|                                                      | (92247) | TTTTTAATTAAACCTTTTATAAATAAATTTATAAAAAAATATATTAATATTAATGATAAACTAATAAGTTTATAAA     |       |       |       |       |       |       |       |
|                                                      | (1)     | -----                                                                            |       |       |       |       |       |       |       |
| Candidatus Carsonella 135557 - 167442nt              | (1)     | -----                                                                            |       |       |       |       |       |       |       |
| SARS-CoV-2 Reference Genome NC_045512.2              | (1)     | -----                                                                            |       |       |       |       |       |       |       |
|                                                      |         | Section 1200                                                                     |       |       |       |       |       |       |       |
| Candidatus Carsonella ruddii strain BT chromosome... | (92324) | 92324                                                                            | 92334 | 92345 | 92356 | 92367 | 92378 | 92389 | 92400 |
|                                                      | (92324) | AATAAGTAGAAATTTTATAAGATGTTTGATAAGTAAATTTTTTATAAAAGAAATATTTTTTAAATAATAACAATAATA   |       |       |       |       |       |       |       |
|                                                      | (1)     | -----                                                                            |       |       |       |       |       |       |       |
| Candidatus Carsonella 135557 - 167442nt              | (1)     | -----                                                                            |       |       |       |       |       |       |       |
| SARS-CoV-2 Reference Genome NC_045512.2              | (1)     | -----                                                                            |       |       |       |       |       |       |       |



## SARS-CoV-2 &amp; Bakterien.apr

|                                                      |         |                                                                               |       |       |       |       |       |             |
|------------------------------------------------------|---------|-------------------------------------------------------------------------------|-------|-------|-------|-------|-------|-------------|
|                                                      |         | Section 1201                                                                  |       |       |       |       |       |             |
| Candidatus Carsonella ruddii strain BT chromosome... | (92401) | 92401                                                                         | 92411 | 92422 | 92433 | 92444 | 92455 | 92466 92477 |
|                                                      | (92401) | ATTATGATAAACTCTTATTGTATAAATTCACCAAATATTGGAAAATATAGAGAATTAAAAAAATATACTGAAAAATA |       |       |       |       |       |             |
|                                                      | (1)     | -----                                                                         |       |       |       |       |       |             |
| Candidatus Carsonella 135557 - 167442nt              | (1)     | -----                                                                         |       |       |       |       |       |             |
| SARS-CoV-2 Reference Genome NC_045512.2              | (1)     | -----                                                                         |       |       |       |       |       |             |
|                                                      |         | Section 1202                                                                  |       |       |       |       |       |             |
| Candidatus Carsonella ruddii strain BT chromosome... | (92478) | 92478                                                                         | 92488 | 92499 | 92510 | 92521 | 92532 | 92543 92554 |
|                                                      | (92478) | TTGGAAAATCAAAACGTAGAAAATTTAAAAAATTAATAATGATATCTAAAAAATTAATTTGAAAAATTTTAA      |       |       |       |       |       |             |
|                                                      | (1)     | -----                                                                         |       |       |       |       |       |             |
| Candidatus Carsonella 135557 - 167442nt              | (1)     | -----                                                                         |       |       |       |       |       |             |
| SARS-CoV-2 Reference Genome NC_045512.2              | (1)     | -----                                                                         |       |       |       |       |       |             |
|                                                      |         | Section 1203                                                                  |       |       |       |       |       |             |
| Candidatus Carsonella ruddii strain BT chromosome... | (92555) | 92555                                                                         | 92565 | 92576 | 92587 | 92598 | 92609 | 92620 92631 |
|                                                      | (92555) | ATCAAACAAATAATAATTTTTTATATATTAATTTTGGAGATTTTAGTTTTATGATTATGTTTTGACATAAGTTGT   |       |       |       |       |       |             |
|                                                      | (1)     | -----                                                                         |       |       |       |       |       |             |
| Candidatus Carsonella 135557 - 167442nt              | (1)     | -----                                                                         |       |       |       |       |       |             |
| SARS-CoV-2 Reference Genome NC_045512.2              | (1)     | -----                                                                         |       |       |       |       |       |             |
|                                                      |         | Section 1204                                                                  |       |       |       |       |       |             |
| Candidatus Carsonella ruddii strain BT chromosome... | (92632) | 92632                                                                         | 92642 | 92653 | 92664 | 92675 | 92686 | 92697 92708 |
|                                                      | (92632) | TTAATAAATTCTTTTAATAATAATTCTATTATAAATATTAAAAAATATTTTTCATTATTAGAGGTACAAATTATAC  |       |       |       |       |       |             |
|                                                      | (1)     | -----                                                                         |       |       |       |       |       |             |
| Candidatus Carsonella 135557 - 167442nt              | (1)     | -----                                                                         |       |       |       |       |       |             |
| SARS-CoV-2 Reference Genome NC_045512.2              | (1)     | -----                                                                         |       |       |       |       |       |             |
|                                                      |         | Section 1205                                                                  |       |       |       |       |       |             |
| Candidatus Carsonella ruddii strain BT chromosome... | (92709) | 92709                                                                         | 92719 | 92730 | 92741 | 92752 | 92763 | 92774 92785 |
|                                                      | (92709) | TTTACCTTGTAATGACAAAATTTTTTGATACCAATTATCATTACATTATTCCTTATGATTAAATAATTTAAAT     |       |       |       |       |       |             |
|                                                      | (1)     | -----                                                                         |       |       |       |       |       |             |
| Candidatus Carsonella 135557 - 167442nt              | (1)     | -----                                                                         |       |       |       |       |       |             |
| SARS-CoV-2 Reference Genome NC_045512.2              | (1)     | -----                                                                         |       |       |       |       |       |             |
|                                                      |         | Section 1206                                                                  |       |       |       |       |       |             |
| Candidatus Carsonella ruddii strain BT chromosome... | (92786) | 92786                                                                         | 92796 | 92807 | 92818 | 92829 | 92840 | 92851 92862 |
|                                                      | (92786) | TATTAAATAATTTTTTTTTTAAATGATTTAAAAAATAATTAAATAGGTATTTTACCTACACCTATAATATTAGGT   |       |       |       |       |       |             |
|                                                      | (1)     | -----                                                                         |       |       |       |       |       |             |
| Candidatus Carsonella 135557 - 167442nt              | (1)     | -----                                                                         |       |       |       |       |       |             |
| SARS-CoV-2 Reference Genome NC_045512.2              | (1)     | -----                                                                         |       |       |       |       |       |             |

## SARS-CoV-2 &amp; Bakterien.apr

|                                                      |         |                                                                               |       |       |       |       |       |       |       |
|------------------------------------------------------|---------|-------------------------------------------------------------------------------|-------|-------|-------|-------|-------|-------|-------|
| Section 1207                                         |         |                                                                               |       |       |       |       |       |       |       |
| Candidatus Carsonella ruddii strain BT chromosome... | (92863) | 92863                                                                         | 92873 | 92884 | 92895 | 92906 | 92917 | 92928 | 92939 |
| Candidatus Carsonella 135557 - 167442nt              | (92863) | CCTTTAAGTTATTTGTTTTATGTATAAAACAACAAAAATACTTTAAAAAATTATTTGAAATTTATATATTAATTAT  |       |       |       |       |       |       |       |
| SARS-CoV-2 Reference Genome NC_045512.2              | (1)     | -----                                                                         |       |       |       |       |       |       |       |
|                                                      | (1)     | -----                                                                         |       |       |       |       |       |       |       |
| Section 1208                                         |         |                                                                               |       |       |       |       |       |       |       |
| Candidatus Carsonella ruddii strain BT chromosome... | (92940) | 92940                                                                         | 92950 | 92961 | 92972 | 92983 | 92994 | 93005 | 93016 |
| Candidatus Carsonella 135557 - 167442nt              | (92940) | TAAAAAATAAAAAAATAATATACAAGAAATTTTTTTTGATGAACCAATATTATGTTGTAAAATAAATTCAAATT    |       |       |       |       |       |       |       |
| SARS-CoV-2 Reference Genome NC_045512.2              | (1)     | -----                                                                         |       |       |       |       |       |       |       |
|                                                      | (1)     | -----                                                                         |       |       |       |       |       |       |       |
| Section 1209                                         |         |                                                                               |       |       |       |       |       |       |       |
| Candidatus Carsonella ruddii strain BT chromosome... | (93017) | 93017                                                                         | 93027 | 93038 | 93049 | 93060 | 93071 | 93082 | 93093 |
| Candidatus Carsonella 135557 - 167442nt              | (93017) | GGAAAAAATTATTCAATTTATTTTATAATAAACTAAAAAATAATTAAAAATAATTATAATTTCTTCATTTAATTTT  |       |       |       |       |       |       |       |
| SARS-CoV-2 Reference Genome NC_045512.2              | (1)     | -----                                                                         |       |       |       |       |       |       |       |
|                                                      | (1)     | -----                                                                         |       |       |       |       |       |       |       |
| Section 1210                                         |         |                                                                               |       |       |       |       |       |       |       |
| Candidatus Carsonella ruddii strain BT chromosome... | (93094) | 93094                                                                         | 93104 | 93115 | 93126 | 93137 | 93148 | 93159 | 93170 |
| Candidatus Carsonella 135557 - 167442nt              | (93094) | AATAAAAAATAATTTTGATATTTTAAATAATTTTGAATATAATTTAAATTTAGAAATTTAAAAAATAATTTATTAGA |       |       |       |       |       |       |       |
| SARS-CoV-2 Reference Genome NC_045512.2              | (1)     | -----                                                                         |       |       |       |       |       |       |       |
|                                                      | (1)     | -----                                                                         |       |       |       |       |       |       |       |
| Section 1211                                         |         |                                                                               |       |       |       |       |       |       |       |
| Candidatus Carsonella ruddii strain BT chromosome... | (93171) | 93171                                                                         | 93181 | 93192 | 93203 | 93214 | 93225 | 93236 | 93247 |
| Candidatus Carsonella 135557 - 167442nt              | (93171) | ATTTATAAAAAAATAATTTTAATATTATACAAAAATAATTTAAATAAACTAATATTTTATTTTATTTAATTTT     |       |       |       |       |       |       |       |
| SARS-CoV-2 Reference Genome NC_045512.2              | (1)     | -----                                                                         |       |       |       |       |       |       |       |
|                                                      | (1)     | -----                                                                         |       |       |       |       |       |       |       |
| Section 1212                                         |         |                                                                               |       |       |       |       |       |       |       |
| Candidatus Carsonella ruddii strain BT chromosome... | (93248) | 93248                                                                         | 93258 | 93269 | 93280 | 93291 | 93302 | 93313 | 93324 |
| Candidatus Carsonella 135557 - 167442nt              | (93248) | TTATAAATAAAAAATATTGTTTCAATCACAAGTAATTTAAATACATACCTTATAATTTATATAGAAAATTTTGAA   |       |       |       |       |       |       |       |
| SARS-CoV-2 Reference Genome NC_045512.2              | (1)     | -----                                                                         |       |       |       |       |       |       |       |
|                                                      | (1)     | -----                                                                         |       |       |       |       |       |       |       |

## SARS-CoV-2 &amp; Bakterien.apr

|                                                      |         |                                                                                 |       |       |       |       |       |             |
|------------------------------------------------------|---------|---------------------------------------------------------------------------------|-------|-------|-------|-------|-------|-------------|
|                                                      |         | Section 1213                                                                    |       |       |       |       |       |             |
| Candidatus Carsonella ruddii strain BT chromosome... | (93325) | 93325                                                                           | 93335 | 93346 | 93357 | 93368 | 93379 | 93390 93401 |
|                                                      | (93325) | AACAAAAATATTTATCTTTTTTTTTTCAAAAAATAAATGAATTAAAAATTAATAAAAAGAAATTTTAAATAAAAAATTT |       |       |       |       |       |             |
|                                                      | (1)     | -----                                                                           |       |       |       |       |       |             |
| Candidatus Carsonella 135557 - 167442nt              | (1)     | -----                                                                           |       |       |       |       |       |             |
| SARS-CoV-2 Reference Genome NC_045512.2              | (1)     | -----                                                                           |       |       |       |       |       |             |
|                                                      |         | Section 1214                                                                    |       |       |       |       |       |             |
| Candidatus Carsonella ruddii strain BT chromosome... | (93402) | 93402                                                                           | 93412 | 93423 | 93434 | 93445 | 93456 | 93467 93478 |
|                                                      | (93402) | AAATAGTTATAACTTATTATATTTAATTAATTTTAAAAATTTATAATAAAAACTTATTATAAATAACAAATTTAATA   |       |       |       |       |       |             |
|                                                      | (1)     | -----                                                                           |       |       |       |       |       |             |
| Candidatus Carsonella 135557 - 167442nt              | (1)     | -----                                                                           |       |       |       |       |       |             |
| SARS-CoV-2 Reference Genome NC_045512.2              | (1)     | -----                                                                           |       |       |       |       |       |             |
|                                                      |         | Section 1215                                                                    |       |       |       |       |       |             |
| Candidatus Carsonella ruddii strain BT chromosome... | (93479) | 93479                                                                           | 93489 | 93500 | 93511 | 93522 | 93533 | 93544 93555 |
|                                                      | (93479) | AAATTTTAAAAAAAAGCAATAAATTAATAAAAAATTTATTAATAAATAATACTATAGGATCTTTTCCACAAAATAAA   |       |       |       |       |       |             |
|                                                      | (1)     | -----                                                                           |       |       |       |       |       |             |
| Candidatus Carsonella 135557 - 167442nt              | (1)     | -----                                                                           |       |       |       |       |       |             |
| SARS-CoV-2 Reference Genome NC_045512.2              | (1)     | -----                                                                           |       |       |       |       |       |             |
|                                                      |         | Section 1216                                                                    |       |       |       |       |       |             |
| Candidatus Carsonella ruddii strain BT chromosome... | (93556) | 93556                                                                           | 93566 | 93577 | 93588 | 93599 | 93610 | 93621 93632 |
|                                                      | (93556) | GAAATTAAAATTTCTAGAAAACAAAAAATTTTTTTTTTATTAAATGAAAAAGAATATAATAATATTTTAAAAGAAAA   |       |       |       |       |       |             |
|                                                      | (1)     | -----                                                                           |       |       |       |       |       |             |
| Candidatus Carsonella 135557 - 167442nt              | (1)     | -----                                                                           |       |       |       |       |       |             |
| SARS-CoV-2 Reference Genome NC_045512.2              | (1)     | -----                                                                           |       |       |       |       |       |             |
|                                                      |         | Section 1217                                                                    |       |       |       |       |       |             |
| Candidatus Carsonella ruddii strain BT chromosome... | (93633) | 93633                                                                           | 93643 | 93654 | 93665 | 93676 | 93687 | 93698 93709 |
|                                                      | (93633) | TATTTATTTATGTTTTATTAAACAAATAAAATTAACATCAAAATTTTAGTTAACGGTGAATTTGAAAGAACAGATA    |       |       |       |       |       |             |
|                                                      | (1)     | -----                                                                           |       |       |       |       |       |             |
| Candidatus Carsonella 135557 - 167442nt              | (1)     | -----                                                                           |       |       |       |       |       |             |
| SARS-CoV-2 Reference Genome NC_045512.2              | (1)     | -----                                                                           |       |       |       |       |       |             |
|                                                      |         | Section 1218                                                                    |       |       |       |       |       |             |
| Candidatus Carsonella ruddii strain BT chromosome... | (93710) | 93710                                                                           | 93720 | 93731 | 93742 | 93753 | 93764 | 93775 93786 |
|                                                      | (93710) | TGGTAGAATTTTTTGCAAAAAATATAAAAGGAATTAATGTTACTAAAAATGGATGGGTACAAAGTTATGGAAGTAGA   |       |       |       |       |       |             |
|                                                      | (1)     | -----                                                                           |       |       |       |       |       |             |
| Candidatus Carsonella 135557 - 167442nt              | (1)     | -----                                                                           |       |       |       |       |       |             |
| SARS-CoV-2 Reference Genome NC_045512.2              | (1)     | -----                                                                           |       |       |       |       |       |             |

## SARS-CoV-2 &amp; Bakterien.apr

|                                                      |         |                                                                                |       |       |       |       |       |       |       |
|------------------------------------------------------|---------|--------------------------------------------------------------------------------|-------|-------|-------|-------|-------|-------|-------|
|                                                      |         | Section 1219                                                                   |       |       |       |       |       |       |       |
| Candidatus Carsonella ruddii strain BT chromosome... | (93787) | 93787                                                                          | 93797 | 93808 | 93819 | 93830 | 93841 | 93852 | 93863 |
|                                                      | (93787) | TATGTTAAACCTCCTATAATATTAAATATCGAAAAATAGTTTAAATATAACTAATAATTGGTATATTTTACTAAAAA  |       |       |       |       |       |       |       |
|                                                      | (1)     | -----                                                                          |       |       |       |       |       |       |       |
| Candidatus Carsonella 135557 - 167442nt              | (1)     | -----                                                                          |       |       |       |       |       |       |       |
| SARS-CoV-2 Reference Genome NC_045512.2              | (1)     | -----                                                                          |       |       |       |       |       |       |       |
|                                                      |         | Section 1220                                                                   |       |       |       |       |       |       |       |
| Candidatus Carsonella ruddii strain BT chromosome... | (93864) | 93864                                                                          | 93874 | 93885 | 93896 | 93907 | 93918 | 93929 | 93940 |
|                                                      | (93864) | AATAACAAAAAAAAAATTAAATTTATTGTTTCAGGACCTATAACAATGTTAAAAATGGTCTTTTTTGATAATAATA   |       |       |       |       |       |       |       |
|                                                      | (1)     | -----                                                                          |       |       |       |       |       |       |       |
| Candidatus Carsonella 135557 - 167442nt              | (1)     | -----                                                                          |       |       |       |       |       |       |       |
| SARS-CoV-2 Reference Genome NC_045512.2              | (1)     | -----                                                                          |       |       |       |       |       |       |       |
|                                                      |         | Section 1221                                                                   |       |       |       |       |       |       |       |
| Candidatus Carsonella ruddii strain BT chromosome... | (93941) | 93941                                                                          | 93951 | 93962 | 93973 | 93984 | 93995 | 94006 | 94017 |
|                                                      | (93941) | AAATTAAATTTTTATTTTGTGTTTAAATTATCAGAAATAATTAGTTTAGAATTATTTAAATTACAAAATAATGGTTTT |       |       |       |       |       |       |       |
|                                                      | (1)     | -----                                                                          |       |       |       |       |       |       |       |
| Candidatus Carsonella 135557 - 167442nt              | (1)     | -----                                                                          |       |       |       |       |       |       |       |
| SARS-CoV-2 Reference Genome NC_045512.2              | (1)     | -----                                                                          |       |       |       |       |       |       |       |
|                                                      |         | Section 1222                                                                   |       |       |       |       |       |       |       |
| Candidatus Carsonella ruddii strain BT chromosome... | (94018) | 94018                                                                          | 94028 | 94039 | 94050 | 94061 | 94072 | 94083 | 94094 |
|                                                      | (94018) | AAAATATTTCAAATAGATGAACCTACTATAAAAGAATGTTTAAATATAAACAAAAAGTATTGGAAATATGAAATAAA  |       |       |       |       |       |       |       |
|                                                      | (1)     | -----                                                                          |       |       |       |       |       |       |       |
| Candidatus Carsonella 135557 - 167442nt              | (1)     | -----                                                                          |       |       |       |       |       |       |       |
| SARS-CoV-2 Reference Genome NC_045512.2              | (1)     | -----                                                                          |       |       |       |       |       |       |       |
|                                                      |         | Section 1223                                                                   |       |       |       |       |       |       |       |
| Candidatus Carsonella ruddii strain BT chromosome... | (94095) | 94095                                                                          | 94105 | 94116 | 94127 | 94138 | 94149 | 94160 | 94171 |
|                                                      | (94095) | TAATTTTTTGTTCGTGTTTAAATAATTGTACTAAATTTATTAAAAAAATAATGAAATACATTACATGTTTGTTATT   |       |       |       |       |       |       |       |
|                                                      | (1)     | -----                                                                          |       |       |       |       |       |       |       |
| Candidatus Carsonella 135557 - 167442nt              | (1)     | -----                                                                          |       |       |       |       |       |       |       |
| SARS-CoV-2 Reference Genome NC_045512.2              | (1)     | -----                                                                          |       |       |       |       |       |       |       |
|                                                      |         | Section 1224                                                                   |       |       |       |       |       |       |       |
| Candidatus Carsonella ruddii strain BT chromosome... | (94172) | 94172                                                                          | 94182 | 94193 | 94204 | 94215 | 94226 | 94237 | 94248 |
|                                                      | (94172) | CTATTTTTTAACGATATAATAAAATTTATTGAAAAATAAATATTGATATATTATCTATAGAATCTACTAGAGAAAAA  |       |       |       |       |       |       |       |
|                                                      | (1)     | -----                                                                          |       |       |       |       |       |       |       |
| Candidatus Carsonella 135557 - 167442nt              | (1)     | -----                                                                          |       |       |       |       |       |       |       |
| SARS-CoV-2 Reference Genome NC_045512.2              | (1)     | -----                                                                          |       |       |       |       |       |       |       |

## SARS-CoV-2 &amp; Bakterien.apr

|                                                      |         |                                                                                |       |       |       |       |       |       |       |
|------------------------------------------------------|---------|--------------------------------------------------------------------------------|-------|-------|-------|-------|-------|-------|-------|
|                                                      |         | Section 1225                                                                   |       |       |       |       |       |       |       |
| Candidatus Carsonella ruddii strain BT chromosome... | (94249) | 94249                                                                          | 94259 | 94270 | 94281 | 94292 | 94303 | 94314 | 94325 |
|                                                      | (94249) | ATGGAAAATTTAAATATATTTAAAAAACTAAATTAAATTTAGGTGCTGGAATTTATGATGTTTCATTCTCCAATTAT  |       |       |       |       |       |       |       |
|                                                      | (1)     | -----                                                                          |       |       |       |       |       |       |       |
| Candidatus Carsonella 135557 - 167442nt              | (1)     | -----                                                                          |       |       |       |       |       |       |       |
| SARS-CoV-2 Reference Genome NC_045512.2              | (1)     | -----                                                                          |       |       |       |       |       |       |       |
|                                                      |         | Section 1226                                                                   |       |       |       |       |       |       |       |
| Candidatus Carsonella ruddii strain BT chromosome... | (94326) | 94326                                                                          | 94336 | 94347 | 94358 | 94369 | 94380 | 94391 | 94402 |
|                                                      | (94326) | ACCATATAAAAAAAAAAATAAAAAAAAAATATTTTTTTTTTGTAAATAAAATTAATTTTTTAAAAATTTTAATTAATC |       |       |       |       |       |       |       |
|                                                      | (1)     | -----                                                                          |       |       |       |       |       |       |       |
| Candidatus Carsonella 135557 - 167442nt              | (1)     | -----                                                                          |       |       |       |       |       |       |       |
| SARS-CoV-2 Reference Genome NC_045512.2              | (1)     | -----                                                                          |       |       |       |       |       |       |       |
|                                                      |         | Section 1227                                                                   |       |       |       |       |       |       |       |
| Candidatus Carsonella ruddii strain BT chromosome... | (94403) | 94403                                                                          | 94413 | 94424 | 94435 | 94446 | 94457 | 94468 | 94479 |
|                                                      | (94403) | CTGATTGTGGATTAAAACTAGAAATTGGTACGAATTAAATTTTACTTTTTTAAATATTAATAATATATTAAATTAT   |       |       |       |       |       |       |       |
|                                                      | (1)     | -----                                                                          |       |       |       |       |       |       |       |
| Candidatus Carsonella 135557 - 167442nt              | (1)     | -----                                                                          |       |       |       |       |       |       |       |
| SARS-CoV-2 Reference Genome NC_045512.2              | (1)     | -----                                                                          |       |       |       |       |       |       |       |
|                                                      |         | Section 1228                                                                   |       |       |       |       |       |       |       |
| Candidatus Carsonella ruddii strain BT chromosome... | (94480) | 94480                                                                          | 94490 | 94501 | 94512 | 94523 | 94534 | 94545 | 94556 |
|                                                      | (94480) | ATAAAAAATTTTTATTATTAAACGAAATTGTTTTCTTTAAATCCAGAAATTTTTCTCTTCTTATAAAATTCTTTTTC  |       |       |       |       |       |       |       |
|                                                      | (1)     | -----                                                                          |       |       |       |       |       |       |       |
| Candidatus Carsonella 135557 - 167442nt              | (1)     | -----                                                                          |       |       |       |       |       |       |       |
| SARS-CoV-2 Reference Genome NC_045512.2              | (1)     | -----                                                                          |       |       |       |       |       |       |       |
|                                                      |         | Section 1229                                                                   |       |       |       |       |       |       |       |
| Candidatus Carsonella ruddii strain BT chromosome... | (94557) | 94557                                                                          | 94567 | 94578 | 94589 | 94600 | 94611 | 94622 | 94633 |
|                                                      | (94557) | TATTTCAAATAAGAAATATTATTAAATATAATAAATATTATTATATGATATAATAGATCACAAATTTCTTTTATTA   |       |       |       |       |       |       |       |
|                                                      | (1)     | -----                                                                          |       |       |       |       |       |       |       |
| Candidatus Carsonella 135557 - 167442nt              | (1)     | -----                                                                          |       |       |       |       |       |       |       |
| SARS-CoV-2 Reference Genome NC_045512.2              | (1)     | -----                                                                          |       |       |       |       |       |       |       |
|                                                      |         | Section 1230                                                                   |       |       |       |       |       |       |       |
| Candidatus Carsonella ruddii strain BT chromosome... | (94634) | 94634                                                                          | 94644 | 94655 | 94666 | 94677 | 94688 | 94699 | 94710 |
|                                                      | (94634) | AAAAATATCTATTATAACAATTTTTTAATAAATAATATTTATTTAAAGAAATATAAATTTCAAATATTTCTTCAAAA  |       |       |       |       |       |       |       |
|                                                      | (1)     | -----                                                                          |       |       |       |       |       |       |       |
| Candidatus Carsonella 135557 - 167442nt              | (1)     | -----                                                                          |       |       |       |       |       |       |       |
| SARS-CoV-2 Reference Genome NC_045512.2              | (1)     | -----                                                                          |       |       |       |       |       |       |       |

## SARS-CoV-2 &amp; Bakterien.apr

|                                                      |         |                                                                               |       |       |       |       |       |             |
|------------------------------------------------------|---------|-------------------------------------------------------------------------------|-------|-------|-------|-------|-------|-------------|
|                                                      |         | Section 1231                                                                  |       |       |       |       |       |             |
| Candidatus Carsonella ruddii strain BT chromosome... | (94711) | 94711                                                                         | 94721 | 94732 | 94743 | 94754 | 94765 | 94776 94787 |
|                                                      | (94711) | ATTTTTTTAAATAAAAAATTCAAAATTATTTAATAATATATATTTTGAGTAAGATTACTTACTATGAATTTATTTTT |       |       |       |       |       |             |
|                                                      | (1)     | -----                                                                         |       |       |       |       |       |             |
| Candidatus Carsonella 135557 - 167442nt              | (1)     | -----                                                                         |       |       |       |       |       |             |
| SARS-CoV-2 Reference Genome NC_045512.2              | (1)     | -----                                                                         |       |       |       |       |       |             |
|                                                      |         | Section 1232                                                                  |       |       |       |       |       |             |
| Candidatus Carsonella ruddii strain BT chromosome... | (94788) | 94788                                                                         | 94798 | 94809 | 94820 | 94831 | 94842 | 94853 94864 |
|                                                      | (94788) | TATAATTTTTATTATTTTTTTAATCATGAATAAAATATATTTTAATTGTATTTGTAATGAAAAATATTATTTGTTTT |       |       |       |       |       |             |
|                                                      | (1)     | -----                                                                         |       |       |       |       |       |             |
| Candidatus Carsonella 135557 - 167442nt              | (1)     | -----                                                                         |       |       |       |       |       |             |
| SARS-CoV-2 Reference Genome NC_045512.2              | (1)     | -----                                                                         |       |       |       |       |       |             |
|                                                      |         | Section 1233                                                                  |       |       |       |       |       |             |
| Candidatus Carsonella ruddii strain BT chromosome... | (94865) | 94865                                                                         | 94875 | 94886 | 94897 | 94908 | 94919 | 94930 94941 |
|                                                      | (94865) | CTTTTTTTAAAAAAATATAAATATAAATATTTGTGTTAATTGTCATCCTTTTTATACAAAAAAAAAAAAATTTATTT |       |       |       |       |       |             |
|                                                      | (1)     | -----                                                                         |       |       |       |       |       |             |
| Candidatus Carsonella 135557 - 167442nt              | (1)     | -----                                                                         |       |       |       |       |       |             |
| SARS-CoV-2 Reference Genome NC_045512.2              | (1)     | -----                                                                         |       |       |       |       |       |             |
|                                                      |         | Section 1234                                                                  |       |       |       |       |       |             |
| Candidatus Carsonella ruddii strain BT chromosome... | (94942) | 94942                                                                         | 94952 | 94963 | 94974 | 94985 | 94996 | 95007 95018 |
|                                                      | (94942) | GATAATTCTAAAAGAGCTAAAAATTTTAATAATAAATATGCAATTTTTTTTAAAAAATAAATTTATATATGGAGATT |       |       |       |       |       |             |
|                                                      | (1)     | -----                                                                         |       |       |       |       |       |             |
| Candidatus Carsonella 135557 - 167442nt              | (1)     | -----                                                                         |       |       |       |       |       |             |
| SARS-CoV-2 Reference Genome NC_045512.2              | (1)     | -----                                                                         |       |       |       |       |       |             |
|                                                      |         | Section 1235                                                                  |       |       |       |       |       |             |
| Candidatus Carsonella ruddii strain BT chromosome... | (95019) | 95019                                                                         | 95029 | 95040 | 95051 | 95062 | 95073 | 95084 95095 |
|                                                      | (95019) | CATGTTTCAGGTAAACTTATATATATAAAAAAATAAACTTAATAAATTTGATACTGATTATTATTTAAATATAAA   |       |       |       |       |       |             |
|                                                      | (1)     | -----                                                                         |       |       |       |       |       |             |
| Candidatus Carsonella 135557 - 167442nt              | (1)     | -----                                                                         |       |       |       |       |       |             |
| SARS-CoV-2 Reference Genome NC_045512.2              | (1)     | -----                                                                         |       |       |       |       |       |             |
|                                                      |         | Section 1236                                                                  |       |       |       |       |       |             |
| Candidatus Carsonella ruddii strain BT chromosome... | (95096) | 95096                                                                         | 95106 | 95117 | 95128 | 95139 | 95150 | 95161 95172 |
|                                                      | (95096) | AAAATTATTTTAAATATGAATTTTTTTTTTAGAATTATTGAAATAAAAAATTTATTATTAATTTTAAATTAAAAAA  |       |       |       |       |       |             |
|                                                      | (1)     | -----                                                                         |       |       |       |       |       |             |
| Candidatus Carsonella 135557 - 167442nt              | (1)     | -----                                                                         |       |       |       |       |       |             |
| SARS-CoV-2 Reference Genome NC_045512.2              | (1)     | -----                                                                         |       |       |       |       |       |             |

## SARS-CoV-2 &amp; Bakterien.apr

|                                                      |         |                                                                                |       |       |       |       |       |       |       |
|------------------------------------------------------|---------|--------------------------------------------------------------------------------|-------|-------|-------|-------|-------|-------|-------|
|                                                      |         | Section 1237                                                                   |       |       |       |       |       |       |       |
| Candidatus Carsonella ruddii strain BT chromosome... | (95173) | 95173                                                                          | 95183 | 95194 | 95205 | 95216 | 95227 | 95238 | 95249 |
|                                                      | (95173) | ATATTTTTTTTTTAGGAGGTGGTTTAATTGTTAAAAATTGTTTTTAATATATAAAAAACAATTCTATAATTGATCAAA |       |       |       |       |       |       |       |
|                                                      | (1)     | -----                                                                          |       |       |       |       |       |       |       |
| Candidatus Carsonella 135557 - 167442nt              | (1)     | -----                                                                          |       |       |       |       |       |       |       |
| SARS-CoV-2 Reference Genome NC_045512.2              | (1)     | -----                                                                          |       |       |       |       |       |       |       |
|                                                      |         | Section 1238                                                                   |       |       |       |       |       |       |       |
| Candidatus Carsonella ruddii strain BT chromosome... | (95250) | 95250                                                                          | 95260 | 95271 | 95282 | 95293 | 95304 | 95315 | 95326 |
|                                                      | (95250) | AAAAAGATTAATATTAAATAATTTTAATCGTCCAACATTAAAAATAATTTTTCTAAAAATAAGATTTTGTATA      |       |       |       |       |       |       |       |
|                                                      | (1)     | -----                                                                          |       |       |       |       |       |       |       |
| Candidatus Carsonella 135557 - 167442nt              | (1)     | -----                                                                          |       |       |       |       |       |       |       |
| SARS-CoV-2 Reference Genome NC_045512.2              | (1)     | -----                                                                          |       |       |       |       |       |       |       |
|                                                      |         | Section 1239                                                                   |       |       |       |       |       |       |       |
| Candidatus Carsonella ruddii strain BT chromosome... | (95327) | 95327                                                                          | 95337 | 95348 | 95359 | 95370 | 95381 | 95392 | 95403 |
|                                                      | (95327) | AGAAAAAATTTTATATAAAAAATTTATAACATTTGTATTACAAAATGTTTAAATGTAATTTTTATTATTATGATA    |       |       |       |       |       |       |       |
|                                                      | (1)     | -----                                                                          |       |       |       |       |       |       |       |
| Candidatus Carsonella 135557 - 167442nt              | (1)     | -----                                                                          |       |       |       |       |       |       |       |
| SARS-CoV-2 Reference Genome NC_045512.2              | (1)     | -----                                                                          |       |       |       |       |       |       |       |
|                                                      |         | Section 1240                                                                   |       |       |       |       |       |       |       |
| Candidatus Carsonella ruddii strain BT chromosome... | (95404) | 95404                                                                          | 95414 | 95425 | 95436 | 95447 | 95458 | 95469 | 95480 |
|                                                      | (95404) | TTAATAAAAAATTAAAAAAATATATAACAAATATATATATTAGTAATTCTTATAAAAAAATTTATAATTTTTTAA    |       |       |       |       |       |       |       |
|                                                      | (1)     | -----                                                                          |       |       |       |       |       |       |       |
| Candidatus Carsonella 135557 - 167442nt              | (1)     | -----                                                                          |       |       |       |       |       |       |       |
| SARS-CoV-2 Reference Genome NC_045512.2              | (1)     | -----                                                                          |       |       |       |       |       |       |       |
|                                                      |         | Section 1241                                                                   |       |       |       |       |       |       |       |
| Candidatus Carsonella ruddii strain BT chromosome... | (95481) | 95481                                                                          | 95491 | 95502 | 95513 | 95524 | 95535 | 95546 | 95557 |
|                                                      | (95481) | CAAAAAAATATTTTTTAATTTTGATTATAATATATATTTTTTATTTTTTAAATTTATTAAATTTAATTTTAAAA     |       |       |       |       |       |       |       |
|                                                      | (1)     | -----                                                                          |       |       |       |       |       |       |       |
| Candidatus Carsonella 135557 - 167442nt              | (1)     | -----                                                                          |       |       |       |       |       |       |       |
| SARS-CoV-2 Reference Genome NC_045512.2              | (1)     | -----                                                                          |       |       |       |       |       |       |       |
|                                                      |         | Section 1242                                                                   |       |       |       |       |       |       |       |
| Candidatus Carsonella ruddii strain BT chromosome... | (95558) | 95558                                                                          | 95568 | 95579 | 95590 | 95601 | 95612 | 95623 | 95634 |
|                                                      | (95558) | ATTATAAATTTATTATTCTTCCTTATGGAGAAAAATGTTAAAAATATTAATTCTTTAAAAATAATTTGGAAATATATG |       |       |       |       |       |       |       |
|                                                      | (1)     | -----                                                                          |       |       |       |       |       |       |       |
| Candidatus Carsonella 135557 - 167442nt              | (1)     | -----                                                                          |       |       |       |       |       |       |       |
| SARS-CoV-2 Reference Genome NC_045512.2              | (1)     | -----                                                                          |       |       |       |       |       |       |       |

## SARS-CoV-2 &amp; Bakterien.apr

|                                                      |         |                                                                                 |       |       |       |       |       |       |       |
|------------------------------------------------------|---------|---------------------------------------------------------------------------------|-------|-------|-------|-------|-------|-------|-------|
| Section 1243                                         |         |                                                                                 |       |       |       |       |       |       |       |
| Candidatus Carsonella ruddii strain BT chromosome... | (95635) | 95635                                                                           | 95645 | 95656 | 95667 | 95678 | 95689 | 95700 | 95711 |
| Candidatus Carsonella 135557 - 167442nt              | (95635) | ATTAATAATCAAATAAATAAAAAATTATAATAC TTTTATAATAGGAGGTGGAGTAATAGGAGATTTAGTTAGTTATGT |       |       |       |       |       |       |       |
| SARS-CoV-2 Reference Genome NC_045512.2              | (1)     | -----                                                                           |       |       |       |       |       |       |       |
|                                                      | (1)     | -----                                                                           |       |       |       |       |       |       |       |
| Section 1244                                         |         |                                                                                 |       |       |       |       |       |       |       |
| Candidatus Carsonella ruddii strain BT chromosome... | (95712) | 95712                                                                           | 95722 | 95733 | 95744 | 95755 | 95766 | 95777 | 95788 |
| Candidatus Carsonella 135557 - 167442nt              | (95712) | TTGTTCTTCATATTTTAGAGGAATAAATTATTGTTTGTTACCTACATCTTTATTATCTCAAATAGATTCTTCTATAG   |       |       |       |       |       |       |       |
| SARS-CoV-2 Reference Genome NC_045512.2              | (1)     | -----                                                                           |       |       |       |       |       |       |       |
|                                                      | (1)     | -----                                                                           |       |       |       |       |       |       |       |
| Section 1245                                         |         |                                                                                 |       |       |       |       |       |       |       |
| Candidatus Carsonella ruddii strain BT chromosome... | (95789) | 95789                                                                           | 95799 | 95810 | 95821 | 95832 | 95843 | 95854 | 95865 |
| Candidatus Carsonella 135557 - 167442nt              | (95789) | GTGGAAAAAATGCAATAAATTTTTTTTCAAAAAATAC TTTAGGAATTATTAATTGTCCTATTTTATATTTATTAAT   |       |       |       |       |       |       |       |
| SARS-CoV-2 Reference Genome NC_045512.2              | (1)     | -----                                                                           |       |       |       |       |       |       |       |
|                                                      | (1)     | -----                                                                           |       |       |       |       |       |       |       |
| Section 1246                                         |         |                                                                                 |       |       |       |       |       |       |       |
| Candidatus Carsonella ruddii strain BT chromosome... | (95866) | 95866                                                                           | 95876 | 95887 | 95898 | 95909 | 95920 | 95931 | 95942 |
| Candidatus Carsonella 135557 - 167442nt              | (95866) | TATTTAATTATTTTTTACATGAAAAAAAAAGAATTTAAAGATGGATATGCAGAAATAATTAAATATTCTTTATTAAA   |       |       |       |       |       |       |       |
| SARS-CoV-2 Reference Genome NC_045512.2              | (1)     | -----                                                                           |       |       |       |       |       |       |       |
|                                                      | (1)     | -----                                                                           |       |       |       |       |       |       |       |
| Section 1247                                         |         |                                                                                 |       |       |       |       |       |       |       |
| Candidatus Carsonella ruddii strain BT chromosome... | (95943) | 95943                                                                           | 95953 | 95964 | 95975 | 95986 | 95997 | 96008 | 96019 |
| Candidatus Carsonella 135557 - 167442nt              | (95943) | TAATAAAAAATTTTTTTTCTATTTGTTTAAAAAAAAAAAAATAAAAAATAATAAGATCATGTTATATTAAAA        |       |       |       |       |       |       |       |
| SARS-CoV-2 Reference Genome NC_045512.2              | (1)     | -----                                                                           |       |       |       |       |       |       |       |
|                                                      | (1)     | -----                                                                           |       |       |       |       |       |       |       |
| Section 1248                                         |         |                                                                                 |       |       |       |       |       |       |       |
| Candidatus Carsonella ruddii strain BT chromosome... | (96020) | 96020                                                                           | 96030 | 96041 | 96052 | 96063 | 96074 | 96085 | 96096 |
| Candidatus Carsonella 135557 - 167442nt              | (96020) | GTAAATAAATTTCTCAAGATTATAAAGAAATAAATTTTAGATCTGTTTTAAATTTAGGACATACTTATGCTCATTGT   |       |       |       |       |       |       |       |
| SARS-CoV-2 Reference Genome NC_045512.2              | (1)     | -----                                                                           |       |       |       |       |       |       |       |
|                                                      | (1)     | -----                                                                           |       |       |       |       |       |       |       |



## SARS-CoV-2 &amp; Bakterien.apr

|                                                      |         |                                                                               |       |       |       |       |       |             |
|------------------------------------------------------|---------|-------------------------------------------------------------------------------|-------|-------|-------|-------|-------|-------------|
|                                                      |         | Section 1249                                                                  |       |       |       |       |       |             |
| Candidatus Carsonella ruddii strain BT chromosome... | (96097) | 96097                                                                         | 96107 | 96118 | 96129 | 96140 | 96151 | 96162 96173 |
|                                                      | (96097) | ATAGAAAATAATAAAATAAAAAATTTTCACATGGTGAATCTGTTACTATCGGTACTATTTTGTGTATTTTATC     |       |       |       |       |       |             |
|                                                      | (1)     | -----                                                                         |       |       |       |       |       |             |
| Candidatus Carsonella 135557 - 167442nt              | (1)     | -----                                                                         |       |       |       |       |       |             |
| SARS-CoV-2 Reference Genome NC_045512.2              | (1)     | -----                                                                         |       |       |       |       |       |             |
|                                                      |         | Section 1250                                                                  |       |       |       |       |       |             |
| Candidatus Carsonella ruddii strain BT chromosome... | (96174) | 96174                                                                         | 96184 | 96195 | 96206 | 96217 | 96228 | 96239 96250 |
|                                                      | (96174) | AAGTTTTTTTTATTTTTTTGTAAATAAAATTATTAAAAAAATTTGAATTTATTTTAAAAATTAATTTTTTTATTA   |       |       |       |       |       |             |
|                                                      | (1)     | -----                                                                         |       |       |       |       |       |             |
| Candidatus Carsonella 135557 - 167442nt              | (1)     | -----                                                                         |       |       |       |       |       |             |
| SARS-CoV-2 Reference Genome NC_045512.2              | (1)     | -----                                                                         |       |       |       |       |       |             |
|                                                      |         | Section 1251                                                                  |       |       |       |       |       |             |
| Candidatus Carsonella ruddii strain BT chromosome... | (96251) | 96251                                                                         | 96261 | 96272 | 96283 | 96294 | 96305 | 96316 96327 |
|                                                      | (96251) | AAAATAAGATAAAAATTTCTAAAAAAATGATTAATAAAATTATTTTAGATAAAAAATTTGATAATAAAATAAATTAT |       |       |       |       |       |             |
|                                                      | (1)     | -----                                                                         |       |       |       |       |       |             |
| Candidatus Carsonella 135557 - 167442nt              | (1)     | -----                                                                         |       |       |       |       |       |             |
| SARS-CoV-2 Reference Genome NC_045512.2              | (1)     | -----                                                                         |       |       |       |       |       |             |
|                                                      |         | Section 1252                                                                  |       |       |       |       |       |             |
| Candidatus Carsonella ruddii strain BT chromosome... | (96328) | 96328                                                                         | 96338 | 96349 | 96360 | 96371 | 96382 | 96393 96404 |
|                                                      | (96328) | ATTATAATGAGAAAAATTGGTTTTTGTATAAAAAAAAAATTAATAAAAAATTTTAAATTATATTTTAAAAAAATT   |       |       |       |       |       |             |
|                                                      | (1)     | -----                                                                         |       |       |       |       |       |             |
| Candidatus Carsonella 135557 - 167442nt              | (1)     | -----                                                                         |       |       |       |       |       |             |
| SARS-CoV-2 Reference Genome NC_045512.2              | (1)     | -----                                                                         |       |       |       |       |       |             |
|                                                      |         | Section 1253                                                                  |       |       |       |       |       |             |
| Candidatus Carsonella ruddii strain BT chromosome... | (96405) | 96405                                                                         | 96415 | 96426 | 96437 | 96448 | 96459 | 96470 96481 |
|                                                      | (96405) | TTATGAAATCTAAATTAATAACTAAATGGCCAGAAAAAGCTTCAAATAGATCAATGTTAAGAGCTGTAGGCTACACT |       |       |       |       |       |             |
|                                                      | (1)     | -----                                                                         |       |       |       |       |       |             |
| Candidatus Carsonella 135557 - 167442nt              | (1)     | -----                                                                         |       |       |       |       |       |             |
| SARS-CoV-2 Reference Genome NC_045512.2              | (1)     | -----                                                                         |       |       |       |       |       |             |
|                                                      |         | Section 1254                                                                  |       |       |       |       |       |             |
| Candidatus Carsonella ruddii strain BT chromosome... | (96482) | 96482                                                                         | 96492 | 96503 | 96514 | 96525 | 96536 | 96547 96558 |
|                                                      | (96482) | GATTATGATTTTAATAAATTTCAAGTAGGAATAGCATCAACATGGAGTAATATAACTCCATGTAATAATCATATAAA |       |       |       |       |       |             |
|                                                      | (1)     | -----                                                                         |       |       |       |       |       |             |
| Candidatus Carsonella 135557 - 167442nt              | (1)     | -----                                                                         |       |       |       |       |       |             |
| SARS-CoV-2 Reference Genome NC_045512.2              | (1)     | -----                                                                         |       |       |       |       |       |             |

## SARS-CoV-2 &amp; Bakterien.apr

|                                                      |         |                                                                                |       |       |       |       |       |       |       |
|------------------------------------------------------|---------|--------------------------------------------------------------------------------|-------|-------|-------|-------|-------|-------|-------|
| Section 1255                                         |         |                                                                                |       |       |       |       |       |       |       |
| Candidatus Carsonella ruddii strain BT chromosome... | (96559) | 96559                                                                          | 96569 | 96580 | 96591 | 96602 | 96613 | 96624 | 96635 |
| Candidatus Carsonella 135557 - 167442nt              | (96559) | TGTATTATCTAAAGCAGTAGAATTTGGAGTTAATAAATTTTGTAATCTACAATATTTAATACAATTACTGTATCTG   |       |       |       |       |       |       |       |
| SARS-CoV-2 Reference Genome NC_045512.2              | (1)     | -----                                                                          |       |       |       |       |       |       |       |
|                                                      | (1)     | -----                                                                          |       |       |       |       |       |       |       |
| Section 1256                                         |         |                                                                                |       |       |       |       |       |       |       |
| Candidatus Carsonella ruddii strain BT chromosome... | (96636) | 96636                                                                          | 96646 | 96657 | 96668 | 96679 | 96690 | 96701 | 96712 |
| Candidatus Carsonella 135557 - 167442nt              | (96636) | ATGGTATTTCAAATGGAAATTTAGGTATGAAATTTTCTTTATTATCAAGAGAAATAATTTCTTCTTCTATTGAAACA  |       |       |       |       |       |       |       |
| SARS-CoV-2 Reference Genome NC_045512.2              | (1)     | -----                                                                          |       |       |       |       |       |       |       |
|                                                      | (1)     | -----                                                                          |       |       |       |       |       |       |       |
| Section 1257                                         |         |                                                                                |       |       |       |       |       |       |       |
| Candidatus Carsonella ruddii strain BT chromosome... | (96713) | 96713                                                                          | 96723 | 96734 | 96745 | 96756 | 96767 | 96778 | 96789 |
| Candidatus Carsonella 135557 - 167442nt              | (96713) | GTTTGTAATGCTCAAAGTTTTGATGGTTTAGTTAGTATCGGAGGATGTGATAAAAATATACCAGGTTGTATATTAGG  |       |       |       |       |       |       |       |
| SARS-CoV-2 Reference Genome NC_045512.2              | (1)     | -----                                                                          |       |       |       |       |       |       |       |
|                                                      | (1)     | -----                                                                          |       |       |       |       |       |       |       |
| Section 1258                                         |         |                                                                                |       |       |       |       |       |       |       |
| Candidatus Carsonella ruddii strain BT chromosome... | (96790) | 96790                                                                          | 96800 | 96811 | 96822 | 96833 | 96844 | 96855 | 96866 |
| Candidatus Carsonella 135557 - 167442nt              | (96790) | TATGTGTAGATTAAATATACCATCTATATTTATTTATGGAGGTACTATTTTGCCAGGAAAAAATAGAACAGATATTA  |       |       |       |       |       |       |       |
| SARS-CoV-2 Reference Genome NC_045512.2              | (1)     | -----                                                                          |       |       |       |       |       |       |       |
|                                                      | (1)     | -----                                                                          |       |       |       |       |       |       |       |
| Section 1259                                         |         |                                                                                |       |       |       |       |       |       |       |
| Candidatus Carsonella ruddii strain BT chromosome... | (96867) | 96867                                                                          | 96877 | 96888 | 96899 | 96910 | 96921 | 96932 | 96943 |
| Candidatus Carsonella 135557 - 167442nt              | (96867) | TATCTGTTTTTGAATCATTAGGTAAATTTTTTCTAAAAAAATAAATGAAAAAGAATTATTAGAAATAGAAAAAAAT   |       |       |       |       |       |       |       |
| SARS-CoV-2 Reference Genome NC_045512.2              | (1)     | -----                                                                          |       |       |       |       |       |       |       |
|                                                      | (1)     | -----                                                                          |       |       |       |       |       |       |       |
| Section 1260                                         |         |                                                                                |       |       |       |       |       |       |       |
| Candidatus Carsonella ruddii strain BT chromosome... | (96944) | 96944                                                                          | 96954 | 96965 | 96976 | 96987 | 96998 | 97009 | 97020 |
| Candidatus Carsonella 135557 - 167442nt              | (96944) | TCTATCATTGGATCTGGATCATGTAGTGGTATGTATACAGCAAATTC AATGGCAATTGTTGCTGAAGTTCTTGGAAT |       |       |       |       |       |       |       |
| SARS-CoV-2 Reference Genome NC_045512.2              | (1)     | -----                                                                          |       |       |       |       |       |       |       |
|                                                      | (1)     | -----                                                                          |       |       |       |       |       |       |       |

## SARS-CoV-2 &amp; Bakterien.apr

|                                                      |         |                                                                                 |       |       |       |       |       |       |       |
|------------------------------------------------------|---------|---------------------------------------------------------------------------------|-------|-------|-------|-------|-------|-------|-------|
|                                                      |         | Section 1261                                                                    |       |       |       |       |       |       |       |
| Candidatus Carsonella ruddii strain BT chromosome... | (97021) | 97021                                                                           | 97031 | 97042 | 97053 | 97064 | 97075 | 97086 | 97097 |
|                                                      | (97021) | TAGTTTACCAAATTCTTCTATTCAAATGCACAATCAATTAATAAAATAATAAATTGTTTAAATTCTGGTAAATTAA    |       |       |       |       |       |       |       |
|                                                      | (1)     | -----                                                                           |       |       |       |       |       |       |       |
| Candidatus Carsonella 135557 - 167442nt              | (1)     | -----                                                                           |       |       |       |       |       |       |       |
| SARS-CoV-2 Reference Genome NC_045512.2              | (1)     | -----                                                                           |       |       |       |       |       |       |       |
|                                                      |         | Section 1262                                                                    |       |       |       |       |       |       |       |
| Candidatus Carsonella ruddii strain BT chromosome... | (97098) | 97098                                                                           | 97108 | 97119 | 97130 | 97141 | 97152 | 97163 | 97174 |
|                                                      | (97098) | TTTTTAATTTATTAATAAATAATATTAAACCTAAAAATATAATAAATATAAATTCTATAAAAAATGCAATTAAAGTA   |       |       |       |       |       |       |       |
|                                                      | (1)     | -----                                                                           |       |       |       |       |       |       |       |
| Candidatus Carsonella 135557 - 167442nt              | (1)     | -----                                                                           |       |       |       |       |       |       |       |
| SARS-CoV-2 Reference Genome NC_045512.2              | (1)     | -----                                                                           |       |       |       |       |       |       |       |
|                                                      |         | Section 1263                                                                    |       |       |       |       |       |       |       |
| Candidatus Carsonella ruddii strain BT chromosome... | (97175) | 97175                                                                           | 97185 | 97196 | 97207 | 97218 | 97229 | 97240 | 97251 |
|                                                      | (97175) | ATATCTTTTTTAGGTGGTCTACCAATTGTATTCTTCATATATTAAGTTTTATAGATTGTTTAAAAATAAATTTTTC    |       |       |       |       |       |       |       |
|                                                      | (1)     | -----                                                                           |       |       |       |       |       |       |       |
| Candidatus Carsonella 135557 - 167442nt              | (1)     | -----                                                                           |       |       |       |       |       |       |       |
| SARS-CoV-2 Reference Genome NC_045512.2              | (1)     | -----                                                                           |       |       |       |       |       |       |       |
|                                                      |         | Section 1264                                                                    |       |       |       |       |       |       |       |
| Candidatus Carsonella ruddii strain BT chromosome... | (97252) | 97252                                                                           | 97262 | 97273 | 97284 | 97295 | 97306 | 97317 | 97328 |
|                                                      | (97252) | TTTACAACAAATAAAAGAATTTTCAAATAATTTACCAATATTTCTGATTTAAACCAAGTGGAATAATTTTATTT      |       |       |       |       |       |       |       |
|                                                      | (1)     | -----                                                                           |       |       |       |       |       |       |       |
| Candidatus Carsonella 135557 - 167442nt              | (1)     | -----                                                                           |       |       |       |       |       |       |       |
| SARS-CoV-2 Reference Genome NC_045512.2              | (1)     | -----                                                                           |       |       |       |       |       |       |       |
|                                                      |         | Section 1265                                                                    |       |       |       |       |       |       |       |
| Candidatus Carsonella ruddii strain BT chromosome... | (97329) | 97329                                                                           | 97339 | 97350 | 97361 | 97372 | 97383 | 97394 | 97405 |
|                                                      | (97329) | CTGATTTAATAAATTCTGGAGGAATACAAAAATTTTAAAAATTTTAAATAGAAAGAAAAATATTATTGATGGTAATACT |       |       |       |       |       |       |       |
|                                                      | (1)     | -----                                                                           |       |       |       |       |       |       |       |
| Candidatus Carsonella 135557 - 167442nt              | (1)     | -----                                                                           |       |       |       |       |       |       |       |
| SARS-CoV-2 Reference Genome NC_045512.2              | (1)     | -----                                                                           |       |       |       |       |       |       |       |
|                                                      |         | Section 1266                                                                    |       |       |       |       |       |       |       |
| Candidatus Carsonella ruddii strain BT chromosome... | (97406) | 97406                                                                           | 97416 | 97427 | 97438 | 97449 | 97460 | 97471 | 97482 |
|                                                      | (97406) | TTAACCATTACTGGTTATTCATTAAAGAAAAATTTAAAAATTTATAAAAAACAAATTATATTAATAAATTATTAAATG  |       |       |       |       |       |       |       |
|                                                      | (1)     | -----                                                                           |       |       |       |       |       |       |       |
| Candidatus Carsonella 135557 - 167442nt              | (1)     | -----                                                                           |       |       |       |       |       |       |       |
| SARS-CoV-2 Reference Genome NC_045512.2              | (1)     | -----                                                                           |       |       |       |       |       |       |       |

## SARS-CoV-2 &amp; Bakterien.apr

|                                                      |         |                                                                                 |       |       |       |       |       |       |       |
|------------------------------------------------------|---------|---------------------------------------------------------------------------------|-------|-------|-------|-------|-------|-------|-------|
|                                                      |         | Section 1267                                                                    |       |       |       |       |       |       |       |
| Candidatus Carsonella ruddii strain BT chromosome... | (97483) | 97483                                                                           | 97493 | 97504 | 97515 | 97526 | 97537 | 97548 | 97559 |
|                                                      | (97483) | TTTAAATTTTCCTATAAAAAAACAAATCAAATAAAAAATTTTATTTGGAAATTTAGCACAAAAGGGTTGTGTTGCAA   |       |       |       |       |       |       |       |
|                                                      | (1)     | -----                                                                           |       |       |       |       |       |       |       |
| Candidatus Carsonella 135557 - 167442nt              | (1)     | -----                                                                           |       |       |       |       |       |       |       |
| SARS-CoV-2 Reference Genome NC_045512.2              | (1)     | -----                                                                           |       |       |       |       |       |       |       |
|                                                      |         | Section 1268                                                                    |       |       |       |       |       |       |       |
| Candidatus Carsonella ruddii strain BT chromosome... | (97560) | 97560                                                                           | 97570 | 97581 | 97592 | 97603 | 97614 | 97625 | 97636 |
|                                                      | (97560) | AAATTTTCAGGTAAAGAAGGTGAACTTTTTTAGGAAAAACAAAAGTTTTTAATTCAGAAGAAGAATCAGTAGAATTT   |       |       |       |       |       |       |       |
|                                                      | (1)     | -----                                                                           |       |       |       |       |       |       |       |
| Candidatus Carsonella 135557 - 167442nt              | (1)     | -----                                                                           |       |       |       |       |       |       |       |
| SARS-CoV-2 Reference Genome NC_045512.2              | (1)     | -----                                                                           |       |       |       |       |       |       |       |
|                                                      |         | Section 1269                                                                    |       |       |       |       |       |       |       |
| Candidatus Carsonella ruddii strain BT chromosome... | (97637) | 97637                                                                           | 97647 | 97658 | 97669 | 97680 | 97691 | 97702 | 97713 |
|                                                      | (97637) | ATTTACAAAAACAAAATTTATTCAAAAAACAATAATAATTATAAGATTTGAAGGAGTTAAAGGTGGTCTCTGGAATGAG |       |       |       |       |       |       |       |
|                                                      | (1)     | -----                                                                           |       |       |       |       |       |       |       |
| Candidatus Carsonella 135557 - 167442nt              | (1)     | -----                                                                           |       |       |       |       |       |       |       |
| SARS-CoV-2 Reference Genome NC_045512.2              | (1)     | -----                                                                           |       |       |       |       |       |       |       |
|                                                      |         | Section 1270                                                                    |       |       |       |       |       |       |       |
| Candidatus Carsonella ruddii strain BT chromosome... | (97714) | 97714                                                                           | 97724 | 97735 | 97746 | 97757 | 97768 | 97779 | 97790 |
|                                                      | (97714) | AGAAATGCTTACACCTACTTCTGCTTTAATAGGTGTTGGAGTAAAAAAAATATTGCTTTAATTACAGATGGGAGAT    |       |       |       |       |       |       |       |
|                                                      | (1)     | -----                                                                           |       |       |       |       |       |       |       |
| Candidatus Carsonella 135557 - 167442nt              | (1)     | -----                                                                           |       |       |       |       |       |       |       |
| SARS-CoV-2 Reference Genome NC_045512.2              | (1)     | -----                                                                           |       |       |       |       |       |       |       |
|                                                      |         | Section 1271                                                                    |       |       |       |       |       |       |       |
| Candidatus Carsonella ruddii strain BT chromosome... | (97791) | 97791                                                                           | 97801 | 97812 | 97823 | 97834 | 97845 | 97856 | 97867 |
|                                                      | (97791) | TTTCTGGTGGAAGTCATGGATTTGTTGTTGGACACGTATCTCCTGAAGCGTATGAAAAAGGAGAAATATCACTTGTT   |       |       |       |       |       |       |       |
|                                                      | (1)     | -----                                                                           |       |       |       |       |       |       |       |
| Candidatus Carsonella 135557 - 167442nt              | (1)     | -----                                                                           |       |       |       |       |       |       |       |
| SARS-CoV-2 Reference Genome NC_045512.2              | (1)     | -----                                                                           |       |       |       |       |       |       |       |
|                                                      |         | Section 1272                                                                    |       |       |       |       |       |       |       |
| Candidatus Carsonella ruddii strain BT chromosome... | (97868) | 97868                                                                           | 97878 | 97889 | 97900 | 97911 | 97922 | 97933 | 97944 |
|                                                      | (97868) | AAAGATAATGAAATTATTATTATTGATTCAATTAATAATAATTTAATATTTTTTATAAATAAAAAAAATTTGTTAAA   |       |       |       |       |       |       |       |
|                                                      | (1)     | -----                                                                           |       |       |       |       |       |       |       |
| Candidatus Carsonella 135557 - 167442nt              | (1)     | -----                                                                           |       |       |       |       |       |       |       |
| SARS-CoV-2 Reference Genome NC_045512.2              | (1)     | -----                                                                           |       |       |       |       |       |       |       |

## SARS-CoV-2 &amp; Bakterien.apr

|                                                      |         |                                                                                |       |       |       |       |       |       |       |
|------------------------------------------------------|---------|--------------------------------------------------------------------------------|-------|-------|-------|-------|-------|-------|-------|
| Section 1273                                         |         |                                                                                |       |       |       |       |       |       |       |
| Candidatus Carsonella ruddii strain BT chromosome... | (97945) | 97945                                                                          | 97955 | 97966 | 97977 | 97988 | 97999 | 98010 | 98021 |
| Candidatus Carsonella 135557 - 167442nt              | (97945) | AAGAAAACAAAATTTTATAAATTATAGTAAAATATCTTTTGGTATATTAAATTTATATAGAAAAATGTCCTTTAGATT |       |       |       |       |       |       |       |
| SARS-CoV-2 Reference Genome NC_045512.2              | (1)     | -----                                                                          |       |       |       |       |       |       |       |
|                                                      | (1)     | -----                                                                          |       |       |       |       |       |       |       |
| Section 1274                                         |         |                                                                                |       |       |       |       |       |       |       |
| Candidatus Carsonella ruddii strain BT chromosome... | (98022) | 98022                                                                          | 98032 | 98043 | 98054 | 98065 | 98076 | 98087 | 98098 |
| Candidatus Carsonella 135557 - 167442nt              | (98022) | CTTCTAAAGGTTTCAGGTTTAAATTATTAAAAAACTAATAAAATTAATTTAGTTATATTTTTTTTTTTGAAAATGT   |       |       |       |       |       |       |       |
| SARS-CoV-2 Reference Genome NC_045512.2              | (1)     | -----                                                                          |       |       |       |       |       |       |       |
|                                                      | (1)     | -----                                                                          |       |       |       |       |       |       |       |
| Section 1275                                         |         |                                                                                |       |       |       |       |       |       |       |
| Candidatus Carsonella ruddii strain BT chromosome... | (98099) | 98099                                                                          | 98109 | 98120 | 98131 | 98142 | 98153 | 98164 | 98175 |
| Candidatus Carsonella 135557 - 167442nt              | (98099) | TAAAATTTTTAAGATTAAAAATTAATTTAAAAAATAAAGAAGTTTAAATATAGAAAAATTTGATATAAAAAATATT   |       |       |       |       |       |       |       |
| SARS-CoV-2 Reference Genome NC_045512.2              | (1)     | -----                                                                          |       |       |       |       |       |       |       |
|                                                      | (1)     | -----                                                                          |       |       |       |       |       |       |       |
| Section 1276                                         |         |                                                                                |       |       |       |       |       |       |       |
| Candidatus Carsonella ruddii strain BT chromosome... | (98176) | 98176                                                                          | 98186 | 98197 | 98208 | 98219 | 98230 | 98241 | 98252 |
| Candidatus Carsonella 135557 - 167442nt              | (98176) | ATTAAAAAATTAATTAAAAATTAATTTATAACAAAAAATAAATAAAAAATGAATAAAAAAATGAATAAAAAAATTT   |       |       |       |       |       |       |       |
| SARS-CoV-2 Reference Genome NC_045512.2              | (1)     | -----                                                                          |       |       |       |       |       |       |       |
|                                                      | (1)     | -----                                                                          |       |       |       |       |       |       |       |
| Section 1277                                         |         |                                                                                |       |       |       |       |       |       |       |
| Candidatus Carsonella ruddii strain BT chromosome... | (98253) | 98253                                                                          | 98263 | 98274 | 98285 | 98296 | 98307 | 98318 | 98329 |
| Candidatus Carsonella 135557 - 167442nt              | (98253) | TAATGTTAAAAAAGAAATTACAATTTCAATATTATTTTTTAAAAATTTAATTTTAGAAATAAATAAATGTTGAT     |       |       |       |       |       |       |       |
| SARS-CoV-2 Reference Genome NC_045512.2              | (1)     | -----                                                                          |       |       |       |       |       |       |       |
|                                                      | (1)     | -----                                                                          |       |       |       |       |       |       |       |
| Section 1278                                         |         |                                                                                |       |       |       |       |       |       |       |
| Candidatus Carsonella ruddii strain BT chromosome... | (98330) | 98330                                                                          | 98340 | 98351 | 98362 | 98373 | 98384 | 98395 | 98406 |
| Candidatus Carsonella 135557 - 167442nt              | (98330) | TTATTAATAAATAATATCATAGATAATTTAAAAATATTTTTTTCATTGTCCTTTTTTAAAAATTTATTTTTTAATTAT |       |       |       |       |       |       |       |
| SARS-CoV-2 Reference Genome NC_045512.2              | (1)     | -----                                                                          |       |       |       |       |       |       |       |
|                                                      | (1)     | -----                                                                          |       |       |       |       |       |       |       |

## SARS-CoV-2 &amp; Bakterien.apr

|                                                      |         |                                                                                 |       |       |       |       |       |       |       |
|------------------------------------------------------|---------|---------------------------------------------------------------------------------|-------|-------|-------|-------|-------|-------|-------|
| Section 1279                                         |         |                                                                                 |       |       |       |       |       |       |       |
| Candidatus Carsonella ruddii strain BT chromosome... | (98407) | 98407                                                                           | 98417 | 98428 | 98439 | 98450 | 98461 | 98472 | 98483 |
| Candidatus Carsonella 135557 - 167442nt              | (98407) | AAATGAAAATAAAAAATGAAATTAAAGAATATGTATTTTTTTCTATAATAATGTTATTTATGATTATAATAAAATCAC  |       |       |       |       |       |       |       |
| SARS-CoV-2 Reference Genome NC_045512.2              | (1)     | -----                                                                           |       |       |       |       |       |       |       |
|                                                      | (1)     | -----                                                                           |       |       |       |       |       |       |       |
| Section 1280                                         |         |                                                                                 |       |       |       |       |       |       |       |
| Candidatus Carsonella ruddii strain BT chromosome... | (98484) | 98484                                                                           | 98494 | 98505 | 98516 | 98527 | 98538 | 98549 | 98560 |
| Candidatus Carsonella 135557 - 167442nt              | (98484) | TTTTATTTGTTAAAAATTATTATAAATTATTTAAAAATAAAAAAAAAAACATAATTAAAAATATTAAAAATAACATAT  |       |       |       |       |       |       |       |
| SARS-CoV-2 Reference Genome NC_045512.2              | (1)     | -----                                                                           |       |       |       |       |       |       |       |
|                                                      | (1)     | -----                                                                           |       |       |       |       |       |       |       |
| Section 1281                                         |         |                                                                                 |       |       |       |       |       |       |       |
| Candidatus Carsonella ruddii strain BT chromosome... | (98561) | 98561                                                                           | 98571 | 98582 | 98593 | 98604 | 98615 | 98626 | 98637 |
| Candidatus Carsonella 135557 - 167442nt              | (98561) | TTATTTATAAAAAATTTTACTTTTATTTTGATAGAAAATTTATATGTTTTATTTCTTTTTTTATAAATTATTTTTT    |       |       |       |       |       |       |       |
| SARS-CoV-2 Reference Genome NC_045512.2              | (1)     | -----                                                                           |       |       |       |       |       |       |       |
|                                                      | (1)     | -----                                                                           |       |       |       |       |       |       |       |
| Section 1282                                         |         |                                                                                 |       |       |       |       |       |       |       |
| Candidatus Carsonella ruddii strain BT chromosome... | (98638) | 98638                                                                           | 98648 | 98659 | 98670 | 98681 | 98692 | 98703 | 98714 |
| Candidatus Carsonella 135557 - 167442nt              | (98638) | ATTTTTTTTTAAATAAATTTATTATTTTTATTTATTTTTTATTTATAAAAAACATTTTTTTGTATAAAATTAATAAAAA |       |       |       |       |       |       |       |
| SARS-CoV-2 Reference Genome NC_045512.2              | (1)     | -----                                                                           |       |       |       |       |       |       |       |
|                                                      | (1)     | -----                                                                           |       |       |       |       |       |       |       |
| Section 1283                                         |         |                                                                                 |       |       |       |       |       |       |       |
| Candidatus Carsonella ruddii strain BT chromosome... | (98715) | 98715                                                                           | 98725 | 98736 | 98747 | 98758 | 98769 | 98780 | 98791 |
| Candidatus Carsonella 135557 - 167442nt              | (98715) | TTTCAATTTTAAATATAAATTGAAAATTTTTTTATTGTTTTATTAGAAATTTTAAATAAAAAATTTAATTAATTTTAA  |       |       |       |       |       |       |       |
| SARS-CoV-2 Reference Genome NC_045512.2              | (1)     | -----                                                                           |       |       |       |       |       |       |       |
|                                                      | (1)     | -----                                                                           |       |       |       |       |       |       |       |
| Section 1284                                         |         |                                                                                 |       |       |       |       |       |       |       |
| Candidatus Carsonella ruddii strain BT chromosome... | (98792) | 98792                                                                           | 98802 | 98813 | 98824 | 98835 | 98846 | 98857 | 98868 |
| Candidatus Carsonella 135557 - 167442nt              | (98792) | AAAAAATTATTGTATTTTGAAATAAAATTTTGTTGTTTTTATCAAATTTAATTTAAAAATGAATTTTTATAATTTT    |       |       |       |       |       |       |       |
| SARS-CoV-2 Reference Genome NC_045512.2              | (1)     | -----                                                                           |       |       |       |       |       |       |       |
|                                                      | (1)     | -----                                                                           |       |       |       |       |       |       |       |

## SARS-CoV-2 &amp; Bakterien.apr

|                                                      |         |                                                                               |       |       |       |       |       |       |       |
|------------------------------------------------------|---------|-------------------------------------------------------------------------------|-------|-------|-------|-------|-------|-------|-------|
|                                                      |         | Section 1285                                                                  |       |       |       |       |       |       |       |
| Candidatus Carsonella ruddii strain BT chromosome... | (98869) | 98869                                                                         | 98879 | 98890 | 98901 | 98912 | 98923 | 98934 | 98945 |
|                                                      | (98869) | ATAAATTTAATTAAGTTAGAATCTATAAAACAAGAAAAACATTAAATTTAATTGCTTCTGAAAATTACTCAAGTTT  |       |       |       |       |       |       |       |
|                                                      | (1)     | -----                                                                         |       |       |       |       |       |       |       |
| Candidatus Carsonella 135557 - 167442nt              | (1)     | -----                                                                         |       |       |       |       |       |       |       |
| SARS-CoV-2 Reference Genome NC_045512.2              | (1)     | -----                                                                         |       |       |       |       |       |       |       |
|                                                      |         | Section 1286                                                                  |       |       |       |       |       |       |       |
| Candidatus Carsonella ruddii strain BT chromosome... | (98946) | 98946                                                                         | 98956 | 98967 | 98978 | 98989 | 99000 | 99011 | 99022 |
|                                                      | (98946) | ATCAACAATAATTTATTCATCTTCTTGTTATATAAATAAATATACAGAAGGTTATCCCAAAAATAGATATTATTCTG |       |       |       |       |       |       |       |
|                                                      | (1)     | -----                                                                         |       |       |       |       |       |       |       |
| Candidatus Carsonella 135557 - 167442nt              | (1)     | -----                                                                         |       |       |       |       |       |       |       |
| SARS-CoV-2 Reference Genome NC_045512.2              | (1)     | -----                                                                         |       |       |       |       |       |       |       |
|                                                      |         | Section 1287                                                                  |       |       |       |       |       |       |       |
| Candidatus Carsonella ruddii strain BT chromosome... | (99023) | 99023                                                                         | 99033 | 99044 | 99055 | 99066 | 99077 | 99088 | 99099 |
|                                                      | (99023) | GTTGTAAATATTTGATATTTTTGAAAACAAAAGTATAATTGAATCTCAATTATTATTTTCTTCATTATTTTCAAAT  |       |       |       |       |       |       |       |
|                                                      | (1)     | -----                                                                         |       |       |       |       |       |       |       |
| Candidatus Carsonella 135557 - 167442nt              | (1)     | -----                                                                         |       |       |       |       |       |       |       |
| SARS-CoV-2 Reference Genome NC_045512.2              | (1)     | -----                                                                         |       |       |       |       |       |       |       |
|                                                      |         | Section 1288                                                                  |       |       |       |       |       |       |       |
| Candidatus Carsonella ruddii strain BT chromosome... | (99100) | 99100                                                                         | 99110 | 99121 | 99132 | 99143 | 99154 | 99165 | 99176 |
|                                                      | (99100) | GTACAACCACATTCTGGAGCACAAAGCAAATTTTGCTGTTTTCCAACTTTATTAAACAAAAATGATAAAATTCTTTC |       |       |       |       |       |       |       |
|                                                      | (1)     | -----                                                                         |       |       |       |       |       |       |       |
| Candidatus Carsonella 135557 - 167442nt              | (1)     | -----                                                                         |       |       |       |       |       |       |       |
| SARS-CoV-2 Reference Genome NC_045512.2              | (1)     | -----                                                                         |       |       |       |       |       |       |       |
|                                                      |         | Section 1289                                                                  |       |       |       |       |       |       |       |
| Candidatus Carsonella ruddii strain BT chromosome... | (99177) | 99177                                                                         | 99187 | 99198 | 99209 | 99220 | 99231 | 99242 | 99253 |
|                                                      | (99177) | TTTAGATTTAAATCAGGAGGACATTTAACACATGGTTTTATTAAGAATTTTCTGCTAAATCTTTAATATTATAA    |       |       |       |       |       |       |       |
|                                                      | (1)     | -----                                                                         |       |       |       |       |       |       |       |
| Candidatus Carsonella 135557 - 167442nt              | (1)     | -----                                                                         |       |       |       |       |       |       |       |
| SARS-CoV-2 Reference Genome NC_045512.2              | (1)     | -----                                                                         |       |       |       |       |       |       |       |
|                                                      |         | Section 1290                                                                  |       |       |       |       |       |       |       |
| Candidatus Carsonella ruddii strain BT chromosome... | (99254) | 99254                                                                         | 99264 | 99275 | 99286 | 99297 | 99308 | 99319 | 99330 |
|                                                      | (99254) | ATTATTGTTTAGATAAAAAATAATTTAATTGATAATAACTATATTAATTTAATAATTAAAAAGAAAAACCAAATTA  |       |       |       |       |       |       |       |
|                                                      | (1)     | -----                                                                         |       |       |       |       |       |       |       |
| Candidatus Carsonella 135557 - 167442nt              | (1)     | -----                                                                         |       |       |       |       |       |       |       |
| SARS-CoV-2 Reference Genome NC_045512.2              | (1)     | -----                                                                         |       |       |       |       |       |       |       |

## SARS-CoV-2 &amp; Bakterien.apr

|                                                      |         |                                                                                |       |       |       |       |       |             |
|------------------------------------------------------|---------|--------------------------------------------------------------------------------|-------|-------|-------|-------|-------|-------------|
|                                                      |         | Section 1291                                                                   |       |       |       |       |       |             |
| Candidatus Carsonella ruddii strain BT chromosome... | (99331) | 99331                                                                          | 99341 | 99352 | 99363 | 99374 | 99385 | 99396 99407 |
|                                                      | (99331) | TTAATTTTAGGATATTCTTCTTATCAAGAGTTAATAGATTGGAAAAAATTAAATATTATTTCTAAAAAAATAATTG   |       |       |       |       |       |             |
|                                                      | (1)     | -----                                                                          |       |       |       |       |       |             |
| Candidatus Carsonella 135557 - 167442nt              | (1)     | -----                                                                          |       |       |       |       |       |             |
| SARS-CoV-2 Reference Genome NC_045512.2              | (1)     | -----                                                                          |       |       |       |       |       |             |
|                                                      |         | Section 1292                                                                   |       |       |       |       |       |             |
| Candidatus Carsonella ruddii strain BT chromosome... | (99408) | 99408                                                                          | 99418 | 99429 | 99440 | 99451 | 99462 | 99473 99484 |
|                                                      | (99408) | TTATATATTATCTGATATTAGTCATATTTCTGGTTTTATATGTTCTGGTTTAATAAAAAATCCTATTAATTATTCAG  |       |       |       |       |       |             |
|                                                      | (1)     | -----                                                                          |       |       |       |       |       |             |
| Candidatus Carsonella 135557 - 167442nt              | (1)     | -----                                                                          |       |       |       |       |       |             |
| SARS-CoV-2 Reference Genome NC_045512.2              | (1)     | -----                                                                          |       |       |       |       |       |             |
|                                                      |         | Section 1293                                                                   |       |       |       |       |       |             |
| Candidatus Carsonella ruddii strain BT chromosome... | (99485) | 99485                                                                          | 99495 | 99506 | 99517 | 99528 | 99539 | 99550 99561 |
|                                                      | (99485) | ATGTTGTTTCTTCAACAACCTATAAAACCTTAAGAGGTATTAAAGGAGGAATACTTTTAAGTAACAATAAAAAATATT |       |       |       |       |       |             |
|                                                      | (1)     | -----                                                                          |       |       |       |       |       |             |
| Candidatus Carsonella 135557 - 167442nt              | (1)     | -----                                                                          |       |       |       |       |       |             |
| SARS-CoV-2 Reference Genome NC_045512.2              | (1)     | -----                                                                          |       |       |       |       |       |             |
|                                                      |         | Section 1294                                                                   |       |       |       |       |       |             |
| Candidatus Carsonella ruddii strain BT chromosome... | (99562) | 99562                                                                          | 99572 | 99583 | 99594 | 99605 | 99616 | 99627 99638 |
|                                                      | (99562) | TTTAATAAAATTAATTCATCTGTTTTTCCAGGTCAACAAGGTGGTTCATAAGTAATAATATTATTAGTAAATATGT   |       |       |       |       |       |             |
|                                                      | (1)     | -----                                                                          |       |       |       |       |       |             |
| Candidatus Carsonella 135557 - 167442nt              | (1)     | -----                                                                          |       |       |       |       |       |             |
| SARS-CoV-2 Reference Genome NC_045512.2              | (1)     | -----                                                                          |       |       |       |       |       |             |
|                                                      |         | Section 1295                                                                   |       |       |       |       |       |             |
| Candidatus Carsonella ruddii strain BT chromosome... | (99639) | 99639                                                                          | 99649 | 99660 | 99671 | 99682 | 99693 | 99704 99715 |
|                                                      | (99639) | TTCTTTTAAAGAAGCAAATAATTTTAATTTTATAAAATATACAAAACAAATTTTAATAAATTCATAAAATAATGTTAA |       |       |       |       |       |             |
|                                                      | (1)     | -----                                                                          |       |       |       |       |       |             |
| Candidatus Carsonella 135557 - 167442nt              | (1)     | -----                                                                          |       |       |       |       |       |             |
| SARS-CoV-2 Reference Genome NC_045512.2              | (1)     | -----                                                                          |       |       |       |       |       |             |
|                                                      |         | Section 1296                                                                   |       |       |       |       |       |             |
| Candidatus Carsonella ruddii strain BT chromosome... | (99716) | 99716                                                                          | 99726 | 99737 | 99748 | 99759 | 99770 | 99781 99792 |
|                                                      | (99716) | AAACTTTTTTTTATAGAGGTTATAAATCTTCTACAAAAGAAACAATAAATCATATGTTTTTAATAAATTTATTAAAT  |       |       |       |       |       |             |
|                                                      | (1)     | -----                                                                          |       |       |       |       |       |             |
| Candidatus Carsonella 135557 - 167442nt              | (1)     | -----                                                                          |       |       |       |       |       |             |
| SARS-CoV-2 Reference Genome NC_045512.2              | (1)     | -----                                                                          |       |       |       |       |       |             |



## SARS-CoV-2 &amp; Bakterien.apr

|                                                      |          |                                                                                   |        |        |        |        |        |        |        |
|------------------------------------------------------|----------|-----------------------------------------------------------------------------------|--------|--------|--------|--------|--------|--------|--------|
|                                                      |          | Section 1297                                                                      |        |        |        |        |        |        |        |
| Candidatus Carsonella ruddii strain BT chromosome... | (99793)  | 99793                                                                             | 99803  | 99814  | 99825  | 99836  | 99847  | 99858  | 99869  |
|                                                      | (99793)  | AAATGTACTTTATTAATTGAAAAAATATTAGAAAAAATGGAATCCTTTTAAACAGGAATTTTTTTCCTAATGATAT      |        |        |        |        |        |        |        |
|                                                      | (1)      | -----                                                                             |        |        |        |        |        |        |        |
| Candidatus Carsonella 135557 - 167442nt              | (1)      | -----                                                                             |        |        |        |        |        |        |        |
| SARS-CoV-2 Reference Genome NC_045512.2              | (1)      | -----                                                                             |        |        |        |        |        |        |        |
|                                                      |          | Section 1298                                                                      |        |        |        |        |        |        |        |
| Candidatus Carsonella ruddii strain BT chromosome... | (99870)  | 99870                                                                             | 99880  | 99891  | 99902  | 99913  | 99924  | 99935  | 99946  |
|                                                      | (99870)  | TAAATTTTCTAAAAATCCAAGTGCGATTAGAATCGGATTATCGTCTGTTACAACAAGAAAAATTAAAAAATTTAGAAG    |        |        |        |        |        |        |        |
|                                                      | (1)      | -----                                                                             |        |        |        |        |        |        |        |
| Candidatus Carsonella 135557 - 167442nt              | (1)      | -----                                                                             |        |        |        |        |        |        |        |
| SARS-CoV-2 Reference Genome NC_045512.2              | (1)      | -----                                                                             |        |        |        |        |        |        |        |
|                                                      |          | Section 1299                                                                      |        |        |        |        |        |        |        |
| Candidatus Carsonella ruddii strain BT chromosome... | (99947)  | 99947                                                                             | 99957  | 99968  | 99979  | 99990  | 100001 | 100012 | 100023 |
|                                                      | (99947)  | TTGAATTAATTTCTAACTATATTTGTGATATAATTGAAAAATTATAAAAAAATTATAAAAAATCAAATAAAAAATATTA   |        |        |        |        |        |        |        |
|                                                      | (1)      | -----                                                                             |        |        |        |        |        |        |        |
| Candidatus Carsonella 135557 - 167442nt              | (1)      | -----                                                                             |        |        |        |        |        |        |        |
| SARS-CoV-2 Reference Genome NC_045512.2              | (1)      | -----                                                                             |        |        |        |        |        |        |        |
|                                                      |          | Section 1300                                                                      |        |        |        |        |        |        |        |
| Candidatus Carsonella ruddii strain BT chromosome... | (100024) | 100024                                                                            | 100034 | 100045 | 100056 | 100067 | 100078 | 100089 | 100100 |
|                                                      | (100024) | TGTTTAAAAATTTCCAATTTATAAATAAATTTTTTTATTAATAAAAAAATAATAAAATTTATTTATAAATATTATATTTTT |        |        |        |        |        |        |        |
|                                                      | (1)      | -----                                                                             |        |        |        |        |        |        |        |
| Candidatus Carsonella 135557 - 167442nt              | (1)      | -----                                                                             |        |        |        |        |        |        |        |
| SARS-CoV-2 Reference Genome NC_045512.2              | (1)      | -----                                                                             |        |        |        |        |        |        |        |
|                                                      |          | Section 1301                                                                      |        |        |        |        |        |        |        |
| Candidatus Carsonella ruddii strain BT chromosome... | (100101) | 100101                                                                            | 100111 | 100122 | 100133 | 100144 | 100155 | 100166 | 100177 |
|                                                      | (100101) | TATTATAAGTATATTAATATTTTTTTTATTAATAAAAAATAATAAAATTTATTTATAAATATTATATTTTTTTATTATAAG |        |        |        |        |        |        |        |
|                                                      | (1)      | -----                                                                             |        |        |        |        |        |        |        |
| Candidatus Carsonella 135557 - 167442nt              | (1)      | -----                                                                             |        |        |        |        |        |        |        |
| SARS-CoV-2 Reference Genome NC_045512.2              | (1)      | -----                                                                             |        |        |        |        |        |        |        |
|                                                      |          | Section 1302                                                                      |        |        |        |        |        |        |        |
| Candidatus Carsonella ruddii strain BT chromosome... | (100178) | 100178                                                                            | 100188 | 100199 | 100210 | 100221 | 100232 | 100243 | 100254 |
|                                                      | (100178) | TATATTAATATTTTTTTTATTAATAAAAAATAATAAAATTTATTTATAAATATTATTTCTATTAATAAATTTTGTATTTT  |        |        |        |        |        |        |        |
|                                                      | (1)      | -----                                                                             |        |        |        |        |        |        |        |
| Candidatus Carsonella 135557 - 167442nt              | (1)      | -----                                                                             |        |        |        |        |        |        |        |
| SARS-CoV-2 Reference Genome NC_045512.2              | (1)      | -----                                                                             |        |        |        |        |        |        |        |

## SARS-CoV-2 &amp; Bakterien.apr

|                                                      |          | Section 1303                                                                     |        |        |        |        |        |               |
|------------------------------------------------------|----------|----------------------------------------------------------------------------------|--------|--------|--------|--------|--------|---------------|
|                                                      | (100255) | 100255                                                                           | 100265 | 100276 | 100287 | 100298 | 100309 | 100320 100331 |
| Candidatus Carsonella ruddii strain BT chromosome... | (100255) | TAAACAAATATAAATTTTAAATCTGAATTATTAATGATGTTATTTTATTATAAAAAAAAAAATAAATATCATTATA     |        |        |        |        |        |               |
| Candidatus Carsonella 135557 - 167442nt              | (1)      | -----                                                                            |        |        |        |        |        |               |
| SARS-CoV-2 Reference Genome NC_045512.2              | (1)      | -----                                                                            |        |        |        |        |        |               |
|                                                      |          | Section 1304                                                                     |        |        |        |        |        |               |
|                                                      | (100332) | 100332                                                                           | 100342 | 100353 | 100364 | 100375 | 100386 | 100397 100408 |
| Candidatus Carsonella ruddii strain BT chromosome... | (100332) | GAATCTGATATAAAAAATTTTTTTTCATTTTAAATTTTAAATGAGTTTAAAAATTTTATTATTTTAAATATTTATTTT   |        |        |        |        |        |               |
| Candidatus Carsonella 135557 - 167442nt              | (1)      | -----                                                                            |        |        |        |        |        |               |
| SARS-CoV-2 Reference Genome NC_045512.2              | (1)      | -----                                                                            |        |        |        |        |        |               |
|                                                      |          | Section 1305                                                                     |        |        |        |        |        |               |
|                                                      | (100409) | 100409                                                                           | 100419 | 100430 | 100441 | 100452 | 100463 | 100474 100485 |
| Candidatus Carsonella ruddii strain BT chromosome... | (100409) | TTTTATATTTGAACAAAATAAATAATTTTATATATTTTAAATTTATTATATAATATATAATAATTAGTTGAAGTTG     |        |        |        |        |        |               |
| Candidatus Carsonella 135557 - 167442nt              | (1)      | -----                                                                            |        |        |        |        |        |               |
| SARS-CoV-2 Reference Genome NC_045512.2              | (1)      | -----                                                                            |        |        |        |        |        |               |
|                                                      |          | Section 1306                                                                     |        |        |        |        |        |               |
|                                                      | (100486) | 100486                                                                           | 100496 | 100507 | 100518 | 100529 | 100540 | 100551 100562 |
| Candidatus Carsonella ruddii strain BT chromosome... | (100486) | AAACTATATTTTTTTTTTATTATTTTCATAAAAAATTATAATTGTAAAAAATTTTTTTTAAATAATTAAAAATTATTTTT |        |        |        |        |        |               |
| Candidatus Carsonella 135557 - 167442nt              | (1)      | -----                                                                            |        |        |        |        |        |               |
| SARS-CoV-2 Reference Genome NC_045512.2              | (1)      | -----                                                                            |        |        |        |        |        |               |
|                                                      |          | Section 1307                                                                     |        |        |        |        |        |               |
|                                                      | (100563) | 100563                                                                           | 100573 | 100584 | 100595 | 100606 | 100617 | 100628 100639 |
| Candidatus Carsonella ruddii strain BT chromosome... | (100563) | ATTTTTTTTAATTTTTTAAAAAAAAAAAAATTAATAATTTTAAATAACAAAAATTATTTATTATAATTTTTTCATATAA  |        |        |        |        |        |               |
| Candidatus Carsonella 135557 - 167442nt              | (1)      | -----                                                                            |        |        |        |        |        |               |
| SARS-CoV-2 Reference Genome NC_045512.2              | (1)      | -----                                                                            |        |        |        |        |        |               |
|                                                      |          | Section 1308                                                                     |        |        |        |        |        |               |
|                                                      | (100640) | 100640                                                                           | 100650 | 100661 | 100672 | 100683 | 100694 | 100705 100716 |
| Candidatus Carsonella ruddii strain BT chromosome... | (100640) | ATAATAAAAAAATTATTTATTTTTTTTTTTTTTAAAAATTAAAAATTTTAAATTTATATAATAATAAACCCCATAAAT   |        |        |        |        |        |               |
| Candidatus Carsonella 135557 - 167442nt              | (1)      | -----                                                                            |        |        |        |        |        |               |
| SARS-CoV-2 Reference Genome NC_045512.2              | (1)      | -----                                                                            |        |        |        |        |        |               |

## SARS-CoV-2 &amp; Bakterien.apr

|                                                      |          |                                                                                  |        |        |        |        |        |               |
|------------------------------------------------------|----------|----------------------------------------------------------------------------------|--------|--------|--------|--------|--------|---------------|
|                                                      |          | Section 1309                                                                     |        |        |        |        |        |               |
|                                                      | (100717) | 100717                                                                           | 100727 | 100738 | 100749 | 100760 | 100771 | 100782 100793 |
| Candidatus Carsonella ruddii strain BT chromosome... | (100717) | AATCACTATCACAATTTACGATTGTATTATCATAATCAAAAAATAATTTTATCATGTTTTTAAATTTATTAATAAT     |        |        |        |        |        |               |
| Candidatus Carsonella 135557 - 167442nt              | (1)      | -----                                                                            |        |        |        |        |        |               |
| SARS-CoV-2 Reference Genome NC_045512.2              | (1)      | -----                                                                            |        |        |        |        |        |               |
|                                                      |          | Section 1310                                                                     |        |        |        |        |        |               |
|                                                      | (100794) | 100794                                                                           | 100804 | 100815 | 100826 | 100837 | 100848 | 100859 100870 |
| Candidatus Carsonella ruddii strain BT chromosome... | (100794) | ATTAATTATTTTTTTTTTAAATATTTATAAAAAAAAAAATAAAAAAAAAATTTAAATAAATTTATTTTACAAAAAT     |        |        |        |        |        |               |
| Candidatus Carsonella 135557 - 167442nt              | (1)      | -----                                                                            |        |        |        |        |        |               |
| SARS-CoV-2 Reference Genome NC_045512.2              | (1)      | -----                                                                            |        |        |        |        |        |               |
|                                                      |          | Section 1311                                                                     |        |        |        |        |        |               |
|                                                      | (100871) | 100871                                                                           | 100881 | 100892 | 100903 | 100914 | 100925 | 100936 100947 |
| Candidatus Carsonella ruddii strain BT chromosome... | (100871) | TAAAAATTTATACAAATTAATAAACAAATTATGAATTTATCTATAATTGGATTACAATGGGGTGATGAAGGAAAGGG    |        |        |        |        |        |               |
| Candidatus Carsonella 135557 - 167442nt              | (1)      | -----                                                                            |        |        |        |        |        |               |
| SARS-CoV-2 Reference Genome NC_045512.2              | (1)      | -----                                                                            |        |        |        |        |        |               |
|                                                      |          | Section 1312                                                                     |        |        |        |        |        |               |
|                                                      | (100948) | 100948                                                                           | 100958 | 100969 | 100980 | 100991 | 101002 | 101013 101024 |
| Candidatus Carsonella ruddii strain BT chromosome... | (100948) | TAAAATTATAGATTTATTGTCTAATTATTCAGATTTAAATATTAGATATAATGGAGGACACAATGCTGGACATATTA    |        |        |        |        |        |               |
| Candidatus Carsonella 135557 - 167442nt              | (1)      | -----                                                                            |        |        |        |        |        |               |
| SARS-CoV-2 Reference Genome NC_045512.2              | (1)      | -----                                                                            |        |        |        |        |        |               |
|                                                      |          | Section 1313                                                                     |        |        |        |        |        |               |
|                                                      | (101025) | 101025                                                                           | 101035 | 101046 | 101057 | 101068 | 101079 | 101090 101101 |
| Candidatus Carsonella ruddii strain BT chromosome... | (101025) | TATATGTTAAAAACAAAAAAAAAAGTATTAGAATATTGCCATCTGGCATATTTAAAAAAATGTTTATGTTTATTA      |        |        |        |        |        |               |
| Candidatus Carsonella 135557 - 167442nt              | (1)      | -----                                                                            |        |        |        |        |        |               |
| SARS-CoV-2 Reference Genome NC_045512.2              | (1)      | -----                                                                            |        |        |        |        |        |               |
|                                                      |          | Section 1314                                                                     |        |        |        |        |        |               |
|                                                      | (101102) | 101102                                                                           | 101112 | 101123 | 101134 | 101145 | 101156 | 101167 101178 |
| Candidatus Carsonella ruddii strain BT chromosome... | (101102) | TCTAATAATGCTTTGTTATCATTATTTAATTTATTAAAAAGAATTAAAAAATATAAAAAATAATTTAATAATTTTCTAGA |        |        |        |        |        |               |
| Candidatus Carsonella 135557 - 167442nt              | (1)      | -----                                                                            |        |        |        |        |        |               |
| SARS-CoV-2 Reference Genome NC_045512.2              | (1)      | -----                                                                            |        |        |        |        |        |               |

## SARS-CoV-2 &amp; Bakterien.apr

|                                                      |          |                                                                                  |        |        |        |        |        |               |
|------------------------------------------------------|----------|----------------------------------------------------------------------------------|--------|--------|--------|--------|--------|---------------|
|                                                      |          | Section 1315                                                                     |        |        |        |        |        |               |
|                                                      | (101179) | 101179                                                                           | 101189 | 101200 | 101211 | 101222 | 101233 | 101244 101255 |
| Candidatus Carsonella ruddii strain BT chromosome... | (101179) | AAATGTATATATTATTAATAAACTTGATGAATTTATTGATTATTTAATTGATAAAATTATTAATATAGGAACAACCTT   |        |        |        |        |        |               |
| Candidatus Carsonella 135557 - 167442nt              | (1)      | -----                                                                            |        |        |        |        |        |               |
| SARS-CoV-2 Reference Genome NC_045512.2              | (1)      | -----                                                                            |        |        |        |        |        |               |
|                                                      |          | Section 1316                                                                     |        |        |        |        |        |               |
|                                                      | (101256) | 101256                                                                           | 101266 | 101277 | 101288 | 101299 | 101310 | 101321 101332 |
| Candidatus Carsonella ruddii strain BT chromosome... | (101256) | ATAGTGGTATAAGTATTTGTTATTTAAAAAATATATAAAATGTTGTTTAAATATAAGAAATGTTTATAAAATAAAAT    |        |        |        |        |        |               |
| Candidatus Carsonella 135557 - 167442nt              | (1)      | -----                                                                            |        |        |        |        |        |               |
| SARS-CoV-2 Reference Genome NC_045512.2              | (1)      | -----                                                                            |        |        |        |        |        |               |
|                                                      |          | Section 1317                                                                     |        |        |        |        |        |               |
|                                                      | (101333) | 101333                                                                           | 101343 | 101354 | 101365 | 101376 | 101387 | 101398 101409 |
| Candidatus Carsonella ruddii strain BT chromosome... | (101333) | TATTTTAATTTAATAAAAAAAAAATATTTTTTTTTTATAATTTATTTTTTATTTTTTTTAAATATAAAATATAAAATAAA |        |        |        |        |        |               |
| Candidatus Carsonella 135557 - 167442nt              | (1)      | -----                                                                            |        |        |        |        |        |               |
| SARS-CoV-2 Reference Genome NC_045512.2              | (1)      | -----                                                                            |        |        |        |        |        |               |
|                                                      |          | Section 1318                                                                     |        |        |        |        |        |               |
|                                                      | (101410) | 101410                                                                           | 101420 | 101431 | 101442 | 101453 | 101464 | 101475 101486 |
| Candidatus Carsonella ruddii strain BT chromosome... | (101410) | TTTTTATTTTTTTTTCAAAAAATATTAAAAAATGATTTTTTTTTTTAAAGAAAAAATAATTAAAAATGATATATTTA    |        |        |        |        |        |               |
| Candidatus Carsonella 135557 - 167442nt              | (1)      | -----                                                                            |        |        |        |        |        |               |
| SARS-CoV-2 Reference Genome NC_045512.2              | (1)      | -----                                                                            |        |        |        |        |        |               |
|                                                      |          | Section 1319                                                                     |        |        |        |        |        |               |
|                                                      | (101487) | 101487                                                                           | 101497 | 101508 | 101519 | 101530 | 101541 | 101552 101563 |
| Candidatus Carsonella ruddii strain BT chromosome... | (101487) | TAAATAATAAAAAATAATAAATTTTTGAAAGTTCACAAGGAACCTTTATTAGATTTTGATTTAGGTACTTATCCTTTT   |        |        |        |        |        |               |
| Candidatus Carsonella 135557 - 167442nt              | (1)      | -----                                                                            |        |        |        |        |        |               |
| SARS-CoV-2 Reference Genome NC_045512.2              | (1)      | -----                                                                            |        |        |        |        |        |               |
|                                                      |          | Section 1320                                                                     |        |        |        |        |        |               |
|                                                      | (101564) | 101564                                                                           | 101574 | 101585 | 101596 | 101607 | 101618 | 101629 101640 |
| Candidatus Carsonella ruddii strain BT chromosome... | (101564) | GTTACTTGTTCAAATACAGTTAATAAATCAATTTTTATAAATTCAAATTTTTTTTTTAAAAAATAAAATTTATTGG     |        |        |        |        |        |               |
| Candidatus Carsonella 135557 - 167442nt              | (1)      | -----                                                                            |        |        |        |        |        |               |
| SARS-CoV-2 Reference Genome NC_045512.2              | (1)      | -----                                                                            |        |        |        |        |        |               |

## SARS-CoV-2 &amp; Bakterien.apr

|                                                      |          |                                                                                |        |        |        |        |        |               |
|------------------------------------------------------|----------|--------------------------------------------------------------------------------|--------|--------|--------|--------|--------|---------------|
|                                                      |          | Section 1321                                                                   |        |        |        |        |        |               |
|                                                      | (101641) | 101641                                                                         | 101651 | 101662 | 101673 | 101684 | 101695 | 101706 101717 |
| Candidatus Carsonella ruddii strain BT chromosome... | (101641) | TATAATAAAATCATATATTACTAGAGTTGGAAACGGTTATTTAATATCTAAAATTAAAAAATTCAAAAATAATTTAT  |        |        |        |        |        |               |
| Candidatus Carsonella 135557 - 167442nt              | (1)      | -----                                                                          |        |        |        |        |        |               |
| SARS-CoV-2 Reference Genome NC_045512.2              | (1)      | -----                                                                          |        |        |        |        |        |               |
|                                                      |          | Section 1322                                                                   |        |        |        |        |        |               |
|                                                      | (101718) | 101718                                                                         | 101728 | 101739 | 101750 | 101761 | 101772 | 101783 101794 |
| Candidatus Carsonella ruddii strain BT chromosome... | (101718) | TTTCTATATTAAGTAAAGAAATTTGGAACAAATTCATTGAGATTAAGAAAAACAGGTTGGTTGGATTATTTTCTTTA  |        |        |        |        |        |               |
| Candidatus Carsonella 135557 - 167442nt              | (1)      | -----                                                                          |        |        |        |        |        |               |
| SARS-CoV-2 Reference Genome NC_045512.2              | (1)      | -----                                                                          |        |        |        |        |        |               |
|                                                      |          | Section 1323                                                                   |        |        |        |        |        |               |
|                                                      | (101795) | 101795                                                                         | 101805 | 101816 | 101827 | 101838 | 101849 | 101860 101871 |
| Candidatus Carsonella ruddii strain BT chromosome... | (101795) | ATTAATATGATAAAAAATAAATAATATTTCAAATATTATTTTAACAAAAATGGATTCATTTATGTTTATTAAATATAT |        |        |        |        |        |               |
| Candidatus Carsonella 135557 - 167442nt              | (1)      | -----                                                                          |        |        |        |        |        |               |
| SARS-CoV-2 Reference Genome NC_045512.2              | (1)      | -----                                                                          |        |        |        |        |        |               |
|                                                      |          | Section 1324                                                                   |        |        |        |        |        |               |
|                                                      | (101872) | 101872                                                                         | 101882 | 101893 | 101904 | 101915 | 101926 | 101937 101948 |
| Candidatus Carsonella ruddii strain BT chromosome... | (101872) | AAAAATAGTAATAAATTATAAATCAAAAAATATTTTAAATAATTATAAAAAATAATTTATTTTGTAAGAAAAATATT  |        |        |        |        |        |               |
| Candidatus Carsonella 135557 - 167442nt              | (1)      | -----                                                                          |        |        |        |        |        |               |
| SARS-CoV-2 Reference Genome NC_045512.2              | (1)      | -----                                                                          |        |        |        |        |        |               |
|                                                      |          | Section 1325                                                                   |        |        |        |        |        |               |
|                                                      | (101949) | 101949                                                                         | 101959 | 101970 | 101981 | 101992 | 102003 | 102014 102025 |
| Candidatus Carsonella ruddii strain BT chromosome... | (101949) | TATTTTTTTTTTCTTGGAAGAAAGTACATTTAAATATTTTAAATGAAAAAATTTTCATTTTATATTAGATTT       |        |        |        |        |        |               |
| Candidatus Carsonella 135557 - 167442nt              | (1)      | -----                                                                          |        |        |        |        |        |               |
| SARS-CoV-2 Reference Genome NC_045512.2              | (1)      | -----                                                                          |        |        |        |        |        |               |
|                                                      |          | Section 1326                                                                   |        |        |        |        |        |               |
|                                                      | (102026) | 102026                                                                         | 102036 | 102047 | 102058 | 102069 | 102080 | 102091 102102 |
| Candidatus Carsonella ruddii strain BT chromosome... | (102026) | ATTGAAAAAATTATAAATACTCCTATTTCAATTATTTCTATAGGTAAAAATAATAAGATATTATTATTTTATGAAT   |        |        |        |        |        |               |
| Candidatus Carsonella 135557 - 167442nt              | (1)      | -----                                                                          |        |        |        |        |        |               |
| SARS-CoV-2 Reference Genome NC_045512.2              | (1)      | -----                                                                          |        |        |        |        |        |               |

## SARS-CoV-2 &amp; Bakterien.apr

|                                                      |          |                                                                               |                        |                        |                        |                        |                        |                                               |
|------------------------------------------------------|----------|-------------------------------------------------------------------------------|------------------------|------------------------|------------------------|------------------------|------------------------|-----------------------------------------------|
|                                                      |          | Section 1327                                                                  |                        |                        |                        |                        |                        |                                               |
|                                                      | (102103) | <a href="#">102103</a>                                                        | <a href="#">102113</a> | <a href="#">102124</a> | <a href="#">102135</a> | <a href="#">102146</a> | <a href="#">102157</a> | <a href="#">102168</a> <a href="#">102179</a> |
| Candidatus Carsonella ruddii strain BT chromosome... | (102103) | AAATTTAATTATTATAGTATAATAAATTCATATCAAATAGAAGAAAAATTTTGTGAAAATTTAATAAAAGAAATTC  |                        |                        |                        |                        |                        |                                               |
| Candidatus Carsonella 135557 - 167442nt              | (1)      | -----                                                                         |                        |                        |                        |                        |                        |                                               |
| SARS-CoV-2 Reference Genome NC_045512.2              | (1)      | -----                                                                         |                        |                        |                        |                        |                        |                                               |
|                                                      |          | Section 1328                                                                  |                        |                        |                        |                        |                        |                                               |
|                                                      | (102180) | <a href="#">102180</a>                                                        | <a href="#">102190</a> | <a href="#">102201</a> | <a href="#">102212</a> | <a href="#">102223</a> | <a href="#">102234</a> | <a href="#">102245</a> <a href="#">102256</a> |
| Candidatus Carsonella ruddii strain BT chromosome... | (102180) | ACGTGTAATAATGAACCAATTTGGATGCTTTCATTAGATTAAATTCCTTTAATTTTTTGAAAAAATTAAATTC     |                        |                        |                        |                        |                        |                                               |
| Candidatus Carsonella 135557 - 167442nt              | (1)      | -----                                                                         |                        |                        |                        |                        |                        |                                               |
| SARS-CoV-2 Reference Genome NC_045512.2              | (1)      | -----                                                                         |                        |                        |                        |                        |                        |                                               |
|                                                      |          | Section 1329                                                                  |                        |                        |                        |                        |                        |                                               |
|                                                      | (102257) | <a href="#">102257</a>                                                        | <a href="#">102267</a> | <a href="#">102278</a> | <a href="#">102289</a> | <a href="#">102300</a> | <a href="#">102311</a> | <a href="#">102322</a> <a href="#">102333</a> |
| Candidatus Carsonella ruddii strain BT chromosome... | (102257) | CAAATTGGGGAAATTTTTTTTTTAAAAAAATTTTACTTTATAATTCTTGTTATTATAGTTTTTCATGATAATAAAAT |                        |                        |                        |                        |                        |                                               |
| Candidatus Carsonella 135557 - 167442nt              | (1)      | -----                                                                         |                        |                        |                        |                        |                        |                                               |
| SARS-CoV-2 Reference Genome NC_045512.2              | (1)      | -----                                                                         |                        |                        |                        |                        |                        |                                               |
|                                                      |          | Section 1330                                                                  |                        |                        |                        |                        |                        |                                               |
|                                                      | (102334) | <a href="#">102334</a>                                                        | <a href="#">102344</a> | <a href="#">102355</a> | <a href="#">102366</a> | <a href="#">102377</a> | <a href="#">102388</a> | <a href="#">102399</a> <a href="#">102410</a> |
| Candidatus Carsonella ruddii strain BT chromosome... | (102334) | AATTATTCTATTAAAAAACTTTTCAAAAATTTATTAATAAAAAACCAATAGATTTTATTATAATTCTATATC      |                        |                        |                        |                        |                        |                                               |
| Candidatus Carsonella 135557 - 167442nt              | (1)      | -----                                                                         |                        |                        |                        |                        |                        |                                               |
| SARS-CoV-2 Reference Genome NC_045512.2              | (1)      | -----                                                                         |                        |                        |                        |                        |                        |                                               |
|                                                      |          | Section 1331                                                                  |                        |                        |                        |                        |                        |                                               |
|                                                      | (102411) | <a href="#">102411</a>                                                        | <a href="#">102421</a> | <a href="#">102432</a> | <a href="#">102443</a> | <a href="#">102454</a> | <a href="#">102465</a> | <a href="#">102476</a> <a href="#">102487</a> |
| Candidatus Carsonella ruddii strain BT chromosome... | (102411) | AATTAAACTACTATGAAAAAAATTTATTTAATAAAGGAATTATTTTTTGTTCATTTAATGAAGCAATAAAAAAT    |                        |                        |                        |                        |                        |                                               |
| Candidatus Carsonella 135557 - 167442nt              | (1)      | -----                                                                         |                        |                        |                        |                        |                        |                                               |
| SARS-CoV-2 Reference Genome NC_045512.2              | (1)      | -----                                                                         |                        |                        |                        |                        |                        |                                               |
|                                                      |          | Section 1332                                                                  |                        |                        |                        |                        |                        |                                               |
|                                                      | (102488) | <a href="#">102488</a>                                                        | <a href="#">102498</a> | <a href="#">102509</a> | <a href="#">102520</a> | <a href="#">102531</a> | <a href="#">102542</a> | <a href="#">102553</a> <a href="#">102564</a> |
| Candidatus Carsonella ruddii strain BT chromosome... | (102488) | TTAAACATATTATTTTAAAATATTTAGGAAGTGTGTAAAACCATATGATAATTTTTTTTCTTGTTTAAATTCTTCA  |                        |                        |                        |                        |                        |                                               |
| Candidatus Carsonella 135557 - 167442nt              | (1)      | -----                                                                         |                        |                        |                        |                        |                        |                                               |
| SARS-CoV-2 Reference Genome NC_045512.2              | (1)      | -----                                                                         |                        |                        |                        |                        |                        |                                               |

|                                                      |          |                                                                                  |        |        |        |        |        |               |
|------------------------------------------------------|----------|----------------------------------------------------------------------------------|--------|--------|--------|--------|--------|---------------|
| Section 1333                                         |          |                                                                                  |        |        |        |        |        |               |
| Candidatus Carsonella ruddii strain BT chromosome... | (102565) | 102565                                                                           | 102575 | 102586 | 102597 | 102608 | 102619 | 102630 102641 |
| Candidatus Carsonella 135557 - 167442nt              | (102565) | ATTTTGTAGTGATGGAAC TTTTGTTTATATTCC TAAAAATACTATATGTCCTATAGAATTATCATCTTATTTTAGAAT |        |        |        |        |        |               |
| SARS-CoV-2 Reference Genome NC_045512.2              | (1)      | -----                                                                            |        |        |        |        |        |               |
| Section 1334                                         |          |                                                                                  |        |        |        |        |        |               |
| Candidatus Carsonella ruddii strain BT chromosome... | (102642) | 102642                                                                           | 102652 | 102663 | 102674 | 102685 | 102696 | 102707 102718 |
| Candidatus Carsonella 135557 - 167442nt              | (102642) | AAATGATGAGGTTGGGCAATTTGAAAGAACATTAATAATATGTGAAGAGAATTCATCAGTTTCTTATTTAGAAGGTT    |        |        |        |        |        |               |
| SARS-CoV-2 Reference Genome NC_045512.2              | (1)      | -----                                                                            |        |        |        |        |        |               |
| Section 1335                                         |          |                                                                                  |        |        |        |        |        |               |
| Candidatus Carsonella ruddii strain BT chromosome... | (102719) | 102719                                                                           | 102729 | 102740 | 102751 | 102762 | 102773 | 102784 102795 |
| Candidatus Carsonella 135557 - 167442nt              | (102719) | GTACAGCTTCTATTAAAAAATAATCAATTACATACAGCTATTGTTGAAATTATTATTAAAAAACTCAACTGTT        |        |        |        |        |        |               |
| SARS-CoV-2 Reference Genome NC_045512.2              | (1)      | -----                                                                            |        |        |        |        |        |               |
| Section 1336                                         |          |                                                                                  |        |        |        |        |        |               |
| Candidatus Carsonella ruddii strain BT chromosome... | (102796) | 102796                                                                           | 102806 | 102817 | 102828 | 102839 | 102850 | 102861 102872 |
| Candidatus Carsonella 135557 - 167442nt              | (102796) | AAATATTCAACTGTTCAAATTTGGTATTCAGGAAATAAATTTAATTTAAATGGAATTTATAATTTTGTAACAAAAAG    |        |        |        |        |        |               |
| SARS-CoV-2 Reference Genome NC_045512.2              | (1)      | -----                                                                            |        |        |        |        |        |               |
| Section 1337                                         |          |                                                                                  |        |        |        |        |        |               |
| Candidatus Carsonella ruddii strain BT chromosome... | (102873) | 102873                                                                           | 102883 | 102894 | 102905 | 102916 | 102927 | 102938 102949 |
| Candidatus Carsonella 135557 - 167442nt              | (102873) | AGGAATTTGCTATGGAAATAATTCAAATTTAATTTGGATTCAAATAGAACTGGATCTTCTATTACTTGGAAATATC     |        |        |        |        |        |               |
| SARS-CoV-2 Reference Genome NC_045512.2              | (1)      | -----                                                                            |        |        |        |        |        |               |
| Section 1338                                         |          |                                                                                  |        |        |        |        |        |               |
| Candidatus Carsonella ruddii strain BT chromosome... | (102950) | 102950                                                                           | 102960 | 102971 | 102982 | 102993 | 103004 | 103015 103026 |
| Candidatus Carsonella 135557 - 167442nt              | (102950) | CTTCTTCTATTTTAAAAGGTAATTTTACAAATAGTGAATTTTATTCTATAAGTATAAGCAATAATTATCAACAAATA    |        |        |        |        |        |               |
| SARS-CoV-2 Reference Genome NC_045512.2              | (1)      | -----                                                                            |        |        |        |        |        |               |

## SARS-CoV-2 &amp; Bakterien.apr

|                                                      |          |                                                                                |        |        |        |        |        |               |
|------------------------------------------------------|----------|--------------------------------------------------------------------------------|--------|--------|--------|--------|--------|---------------|
|                                                      |          | Section 1339                                                                   |        |        |        |        |        |               |
|                                                      | (103027) | 103027                                                                         | 103037 | 103048 | 103059 | 103070 | 103081 | 103092 103103 |
| Candidatus Carsonella ruddii strain BT chromosome... | (103027) | GATACTGGAACAAAAATGTATTATTTAGGAAATAACGCTAATTCTTATATTAATTCTAAAAGTATATCATTAAATAA  |        |        |        |        |        |               |
| Candidatus Carsonella 135557 - 167442nt              | (1)      | -----                                                                          |        |        |        |        |        |               |
| SARS-CoV-2 Reference Genome NC_045512.2              | (1)      | -----                                                                          |        |        |        |        |        |               |
|                                                      |          | Section 1340                                                                   |        |        |        |        |        |               |
|                                                      | (103104) | 103104                                                                         | 103114 | 103125 | 103136 | 103147 | 103158 | 103169 103180 |
| Candidatus Carsonella ruddii strain BT chromosome... | (103104) | TTCTATACAAACTTATAGAGGATATATAAAAGTTTGGAAAAATCTAAAAATTCTAAAAATTATACTTCTTGTGATT   |        |        |        |        |        |               |
| Candidatus Carsonella 135557 - 167442nt              | (1)      | -----                                                                          |        |        |        |        |        |               |
| SARS-CoV-2 Reference Genome NC_045512.2              | (1)      | -----                                                                          |        |        |        |        |        |               |
|                                                      |          | Section 1341                                                                   |        |        |        |        |        |               |
|                                                      | (103181) | 103181                                                                         | 103191 | 103202 | 103213 | 103224 | 103235 | 103246 103257 |
| Candidatus Carsonella ruddii strain BT chromosome... | (103181) | CGATAATTATGGATAATGGTAAAATTTTACGTTTCCAATAAATTCTATTTTAAATTATAATTCAATTATAGAACAT   |        |        |        |        |        |               |
| Candidatus Carsonella 135557 - 167442nt              | (1)      | -----                                                                          |        |        |        |        |        |               |
| SARS-CoV-2 Reference Genome NC_045512.2              | (1)      | -----                                                                          |        |        |        |        |        |               |
|                                                      |          | Section 1342                                                                   |        |        |        |        |        |               |
|                                                      | (103258) | 103258                                                                         | 103268 | 103279 | 103290 | 103301 | 103312 | 103323 103334 |
| Candidatus Carsonella ruddii strain BT chromosome... | (103258) | GAAGCTAGTGTTACTAAAATTTTCATTAAATGAAATTATTTTATTAAAAAGTAAAGGATTATGGAATCATCAATGTTA |        |        |        |        |        |               |
| Candidatus Carsonella 135557 - 167442nt              | (1)      | -----                                                                          |        |        |        |        |        |               |
| SARS-CoV-2 Reference Genome NC_045512.2              | (1)      | -----                                                                          |        |        |        |        |        |               |
|                                                      |          | Section 1343                                                                   |        |        |        |        |        |               |
|                                                      | (103335) | 103335                                                                         | 103345 | 103356 | 103367 | 103378 | 103389 | 103400 103411 |
| Candidatus Carsonella ruddii strain BT chromosome... | (103335) | TAATATGTTAATTAATAATTTTGTACAGTATTATTAAAAACTTCCTTTAGAAATTTTTTCTGAAATTAATGATT     |        |        |        |        |        |               |
| Candidatus Carsonella 135557 - 167442nt              | (1)      | -----                                                                          |        |        |        |        |        |               |
| SARS-CoV-2 Reference Genome NC_045512.2              | (1)      | -----                                                                          |        |        |        |        |        |               |
|                                                      |          | Section 1344                                                                   |        |        |        |        |        |               |
|                                                      | (103412) | 103412                                                                         | 103422 | 103433 | 103444 | 103455 | 103466 | 103477 103488 |
| Candidatus Carsonella ruddii strain BT chromosome... | (103412) | TAATAAGTTCTATAATAAATTATTCTATAATATGATTAAAAATTATTAATTTATCAATAAAATGTGAAAATTTTTTCA |        |        |        |        |        |               |
| Candidatus Carsonella 135557 - 167442nt              | (1)      | -----                                                                          |        |        |        |        |        |               |
| SARS-CoV-2 Reference Genome NC_045512.2              | (1)      | -----                                                                          |        |        |        |        |        |               |



## SARS-CoV-2 &amp; Bakterien.apr

|                                                      |          |                                                                                |        |        |        |        |                      |
|------------------------------------------------------|----------|--------------------------------------------------------------------------------|--------|--------|--------|--------|----------------------|
|                                                      |          |                                                                                |        |        |        |        | Section 1345         |
|                                                      | (103489) | 103489                                                                         | 103499 | 103510 | 103521 | 103532 | 103543 103554 103565 |
| Candidatus Carsonella ruddii strain BT chromosome... | (103489) | TTTTTAAAAATATTAATTTTTTAATAAATAAAAAATAAAATTTATGTTATTATTGGAAATAATGGAATAGGAAATCT  |        |        |        |        |                      |
| Candidatus Carsonella 135557 - 167442nt              | (1)      | -----                                                                          |        |        |        |        |                      |
| SARS-CoV-2 Reference Genome NC_045512.2              | (1)      | -----                                                                          |        |        |        |        |                      |
|                                                      |          |                                                                                |        |        |        |        | Section 1346         |
|                                                      | (103566) | 103566                                                                         | 103576 | 103587 | 103598 | 103609 | 103620 103631 103642 |
| Candidatus Carsonella ruddii strain BT chromosome... | (103566) | ACTTTGTTAAAAATCTTTTATAAAAGATGAAAATTATTTTTTTAGTGGAAAAATTATTTTTAATAAAATTAATATTTT |        |        |        |        |                      |
| Candidatus Carsonella 135557 - 167442nt              | (1)      | -----                                                                          |        |        |        |        |                      |
| SARS-CoV-2 Reference Genome NC_045512.2              | (1)      | -----                                                                          |        |        |        |        |                      |
|                                                      |          |                                                                                |        |        |        |        | Section 1347         |
|                                                      | (103643) | 103643                                                                         | 103653 | 103664 | 103675 | 103686 | 103697 103708 103719 |
| Candidatus Carsonella ruddii strain BT chromosome... | (103643) | AAATTATAAAACAGATTATATTTCTAGATTTGGTATTTTTTATTCTTTTCAAATTTCTATAGAAATTTATAATATTA  |        |        |        |        |                      |
| Candidatus Carsonella 135557 - 167442nt              | (1)      | -----                                                                          |        |        |        |        |                      |
| SARS-CoV-2 Reference Genome NC_045512.2              | (1)      | -----                                                                          |        |        |        |        |                      |
|                                                      |          |                                                                                |        |        |        |        | Section 1348         |
|                                                      | (103720) | 103720                                                                         | 103730 | 103741 | 103752 | 103763 | 103774 103785 103796 |
| Candidatus Carsonella ruddii strain BT chromosome... | (103720) | AAAATATTTTTTTTTTAAAACTTGTTATAATATTTAATTTAAATAATATTTTTTTTTTTAAATTATTAAAAATTT    |        |        |        |        |                      |
| Candidatus Carsonella 135557 - 167442nt              | (1)      | -----                                                                          |        |        |        |        |                      |
| SARS-CoV-2 Reference Genome NC_045512.2              | (1)      | -----                                                                          |        |        |        |        |                      |
|                                                      |          |                                                                                |        |        |        |        | Section 1349         |
|                                                      | (103797) | 103797                                                                         | 103807 | 103818 | 103829 | 103840 | 103851 103862 103873 |
| Candidatus Carsonella ruddii strain BT chromosome... | (103797) | TATCAAGAAAAAATAAATTTTAAAAAAAACTTTTTTTAGAAGTTATAATTATGGTTTTCTGGTGGTGAAAAAAA     |        |        |        |        |                      |
| Candidatus Carsonella 135557 - 167442nt              | (1)      | -----                                                                          |        |        |        |        |                      |
| SARS-CoV-2 Reference Genome NC_045512.2              | (1)      | -----                                                                          |        |        |        |        |                      |
|                                                      |          |                                                                                |        |        |        |        | Section 1350         |
|                                                      | (103874) | 103874                                                                         | 103884 | 103895 | 103906 | 103917 | 103928 103939 103950 |
| Candidatus Carsonella ruddii strain BT chromosome... | (103874) | AAAAAATGATTTTTTGTGTTTTAATAATAATTAATCCATGTTTTATTTTATTAGATGAAATAGATTGAGGATTAGATT |        |        |        |        |                      |
| Candidatus Carsonella 135557 - 167442nt              | (1)      | -----                                                                          |        |        |        |        |                      |
| SARS-CoV-2 Reference Genome NC_045512.2              | (1)      | -----                                                                          |        |        |        |        |                      |

## SARS-CoV-2 &amp; Bakterien.apr

|                                                      |          |                                                                                |        |        |        |        |        |               |
|------------------------------------------------------|----------|--------------------------------------------------------------------------------|--------|--------|--------|--------|--------|---------------|
|                                                      |          | Section 1351                                                                   |        |        |        |        |        |               |
|                                                      | (103951) | 103951                                                                         | 103961 | 103972 | 103983 | 103994 | 104005 | 104016 104027 |
| Candidatus Carsonella ruddii strain BT chromosome... | (103951) | ATCAATCTTTTTTATTTATTGTTAATTACTTAAATTTAATAAAAAAAAAATAAATTTATAATTTTAATTACTCATAAT |        |        |        |        |        |               |
| Candidatus Carsonella 135557 - 167442nt              | (1)      | -----                                                                          |        |        |        |        |        |               |
| SARS-CoV-2 Reference Genome NC_045512.2              | (1)      | -----                                                                          |        |        |        |        |        |               |
|                                                      |          | Section 1352                                                                   |        |        |        |        |        |               |
|                                                      | (104028) | 104028                                                                         | 104038 | 104049 | 104060 | 104071 | 104082 | 104093 104104 |
| Candidatus Carsonella ruddii strain BT chromosome... | (104028) | AAAAATATTGGACAATTTTAAATTGTTGATTTTTTATATTAATTAATAATAATATTAATATATTATCATGTAT      |        |        |        |        |        |               |
| Candidatus Carsonella 135557 - 167442nt              | (1)      | -----                                                                          |        |        |        |        |        |               |
| SARS-CoV-2 Reference Genome NC_045512.2              | (1)      | -----                                                                          |        |        |        |        |        |               |
|                                                      |          | Section 1353                                                                   |        |        |        |        |        |               |
|                                                      | (104105) | 104105                                                                         | 104115 | 104126 | 104137 | 104148 | 104159 | 104170 104181 |
| Candidatus Carsonella ruddii strain BT chromosome... | (104105) | AAAAAATATTTATTAAAAAACCTTTTTTTATATTTTAAAAAATTTTATCATAAAAAATAAGTACTTAAATTT       |        |        |        |        |        |               |
| Candidatus Carsonella 135557 - 167442nt              | (1)      | -----                                                                          |        |        |        |        |        |               |
| SARS-CoV-2 Reference Genome NC_045512.2              | (1)      | -----                                                                          |        |        |        |        |        |               |
|                                                      |          | Section 1354                                                                   |        |        |        |        |        |               |
|                                                      | (104182) | 104182                                                                         | 104192 | 104203 | 104214 | 104225 | 104236 | 104247 104258 |
| Candidatus Carsonella ruddii strain BT chromosome... | (104182) | TTTTTTTTTATAAAATTTTAAAAAGAATTTTTTTTAAAAAATTAATAATTTAAATTGTATAATTATTAAAA        |        |        |        |        |        |               |
| Candidatus Carsonella 135557 - 167442nt              | (1)      | -----                                                                          |        |        |        |        |        |               |
| SARS-CoV-2 Reference Genome NC_045512.2              | (1)      | -----                                                                          |        |        |        |        |        |               |
|                                                      |          | Section 1355                                                                   |        |        |        |        |        |               |
|                                                      | (104259) | 104259                                                                         | 104269 | 104280 | 104291 | 104302 | 104313 | 104324 104335 |
| Candidatus Carsonella ruddii strain BT chromosome... | (104259) | ATTTTACAAATAAAATTTTAAATTATTTTTTTTAAAAAGAAATAAAAAATAATTTAAAAAATAATATTTTAAATATT  |        |        |        |        |        |               |
| Candidatus Carsonella 135557 - 167442nt              | (1)      | -----                                                                          |        |        |        |        |        |               |
| SARS-CoV-2 Reference Genome NC_045512.2              | (1)      | -----                                                                          |        |        |        |        |        |               |
|                                                      |          | Section 1356                                                                   |        |        |        |        |        |               |
|                                                      | (104336) | 104336                                                                         | 104346 | 104357 | 104368 | 104379 | 104390 | 104401 104412 |
| Candidatus Carsonella ruddii strain BT chromosome... | (104336) | TTATTTTTTAATATTTAATATTAATTATTTATTACTGTTAGTTAAAAATCTTTTTTATATATAAAAAATTTTAAACAA |        |        |        |        |        |               |
| Candidatus Carsonella 135557 - 167442nt              | (1)      | -----                                                                          |        |        |        |        |        |               |
| SARS-CoV-2 Reference Genome NC_045512.2              | (1)      | -----                                                                          |        |        |        |        |        |               |

## SARS-CoV-2 &amp; Bakterien.apr

|                                                      |          |                                                                               |        |        |        |        |        |               |
|------------------------------------------------------|----------|-------------------------------------------------------------------------------|--------|--------|--------|--------|--------|---------------|
|                                                      |          | Section 1357                                                                  |        |        |        |        |        |               |
|                                                      | (104413) | 104413                                                                        | 104423 | 104434 | 104445 | 104456 | 104467 | 104478 104489 |
| Candidatus Carsonella ruddii strain BT chromosome... | (104413) | TATTAAAATTGAATTTTTTTTTTATTTTTTCAAAAATTTTATTTTATTAACAATAATAAAAAATATTTTTTTTTTAA |        |        |        |        |        |               |
| Candidatus Carsonella 135557 - 167442nt              | (1)      | -----                                                                         |        |        |        |        |        |               |
| SARS-CoV-2 Reference Genome NC_045512.2              | (1)      | -----                                                                         |        |        |        |        |        |               |
|                                                      |          | Section 1358                                                                  |        |        |        |        |        |               |
|                                                      | (104490) | 104490                                                                        | 104500 | 104511 | 104522 | 104533 | 104544 | 104555 104566 |
| Candidatus Carsonella ruddii strain BT chromosome... | (104490) | TAAATATAATCATGTATTTAAAAAATTTTTTTAAAAAATAATAAATTTTAAACAATATTTTTTTTATA          |        |        |        |        |        |               |
| Candidatus Carsonella 135557 - 167442nt              | (1)      | -----                                                                         |        |        |        |        |        |               |
| SARS-CoV-2 Reference Genome NC_045512.2              | (1)      | -----                                                                         |        |        |        |        |        |               |
|                                                      |          | Section 1359                                                                  |        |        |        |        |        |               |
|                                                      | (104567) | 104567                                                                        | 104577 | 104588 | 104599 | 104610 | 104621 | 104632 104643 |
| Candidatus Carsonella ruddii strain BT chromosome... | (104567) | CTAGAAAATAATTTTTATATATATATATATTTAAAAATTTAAACATTTATTTATTTTTTAAATAAAAAATTCA     |        |        |        |        |        |               |
| Candidatus Carsonella 135557 - 167442nt              | (1)      | -----                                                                         |        |        |        |        |        |               |
| SARS-CoV-2 Reference Genome NC_045512.2              | (1)      | -----                                                                         |        |        |        |        |        |               |
|                                                      |          | Section 1360                                                                  |        |        |        |        |        |               |
|                                                      | (104644) | 104644                                                                        | 104654 | 104665 | 104676 | 104687 | 104698 | 104709 104720 |
| Candidatus Carsonella ruddii strain BT chromosome... | (104644) | AATTTATGAAAAAAAAAATTTTTATATTGAATTTTTTTAATAAAAGGATATTTTATTTTTCTTTAATATATAATA   |        |        |        |        |        |               |
| Candidatus Carsonella 135557 - 167442nt              | (1)      | -----                                                                         |        |        |        |        |        |               |
| SARS-CoV-2 Reference Genome NC_045512.2              | (1)      | -----                                                                         |        |        |        |        |        |               |
|                                                      |          | Section 1361                                                                  |        |        |        |        |        |               |
|                                                      | (104721) | 104721                                                                        | 104731 | 104742 | 104753 | 104764 | 104775 | 104786 104797 |
| Candidatus Carsonella ruddii strain BT chromosome... | (104721) | AAATATATATTAAAAAATTTAAAAATATATTTATTTATCAAAATGCAGAATTTATATTTAACAAATATAGTTTT    |        |        |        |        |        |               |
| Candidatus Carsonella 135557 - 167442nt              | (1)      | -----                                                                         |        |        |        |        |        |               |
| SARS-CoV-2 Reference Genome NC_045512.2              | (1)      | -----                                                                         |        |        |        |        |        |               |
|                                                      |          | Section 1362                                                                  |        |        |        |        |        |               |
|                                                      | (104798) | 104798                                                                        | 104808 | 104819 | 104830 | 104841 | 104852 | 104863 104874 |
| Candidatus Carsonella ruddii strain BT chromosome... | (104798) | TCTATAATTAACTTAAATATTAATTTATATACTAAAAAATTTTTGCAAACATAAAATTTCTTTTTATTGTTTAA    |        |        |        |        |        |               |
| Candidatus Carsonella 135557 - 167442nt              | (1)      | -----                                                                         |        |        |        |        |        |               |
| SARS-CoV-2 Reference Genome NC_045512.2              | (1)      | -----                                                                         |        |        |        |        |        |               |

## SARS-CoV-2 &amp; Bakterien.apr

|                                                      |          |                                                                               |        |        |        |        |        |               |
|------------------------------------------------------|----------|-------------------------------------------------------------------------------|--------|--------|--------|--------|--------|---------------|
|                                                      |          | Section 1363                                                                  |        |        |        |        |        |               |
|                                                      | (104875) | 104875                                                                        | 104885 | 104896 | 104907 | 104918 | 104929 | 104940 104951 |
| Candidatus Carsonella ruddii strain BT chromosome... | (104875) | TAAAAAATTTTTTTTATTAAAAATAAATTAATAAATAAAATATAATGTTTTTTTTTAAATAAAATATAAAAAAAT   |        |        |        |        |        |               |
| Candidatus Carsonella 135557 - 167442nt              | (1)      | -----                                                                         |        |        |        |        |        |               |
| SARS-CoV-2 Reference Genome NC_045512.2              | (1)      | -----                                                                         |        |        |        |        |        |               |
|                                                      |          | Section 1364                                                                  |        |        |        |        |        |               |
|                                                      | (104952) | 104952                                                                        | 104962 | 104973 | 104984 | 104995 | 105006 | 105017 105028 |
| Candidatus Carsonella ruddii strain BT chromosome... | (104952) | TATTTATTTTGATAATTCTTCTACAAATCAAAAACCTAATATTTTATTTAAATCTACTATTAATATTTTACAAAAA  |        |        |        |        |        |               |
| Candidatus Carsonella 135557 - 167442nt              | (1)      | -----                                                                         |        |        |        |        |        |               |
| SARS-CoV-2 Reference Genome NC_045512.2              | (1)      | -----                                                                         |        |        |        |        |        |               |
|                                                      |          | Section 1365                                                                  |        |        |        |        |        |               |
|                                                      | (105029) | 105029                                                                        | 105039 | 105050 | 105061 | 105072 | 105083 | 105094 105105 |
| Candidatus Carsonella ruddii strain BT chromosome... | (105029) | AAAATTTTAATATAAATAAAGGAAATTATAATTTATTAGATAAAAAATTAATTTTATTCAAAAAATTAAATTTATTA |        |        |        |        |        |               |
| Candidatus Carsonella 135557 - 167442nt              | (1)      | -----                                                                         |        |        |        |        |        |               |
| SARS-CoV-2 Reference Genome NC_045512.2              | (1)      | -----                                                                         |        |        |        |        |        |               |
|                                                      |          | Section 1366                                                                  |        |        |        |        |        |               |
|                                                      | (105106) | 105106                                                                        | 105116 | 105127 | 105138 | 105149 | 105160 | 105171 105182 |
| Candidatus Carsonella ruddii strain BT chromosome... | (105106) | ATAAAAAAATATTACAATGTAATTTTATAGAAGAAATTATTTTTTTTTTAAATCTACTTTTTCTATTAATTTTAT   |        |        |        |        |        |               |
| Candidatus Carsonella 135557 - 167442nt              | (1)      | -----                                                                         |        |        |        |        |        |               |
| SARS-CoV-2 Reference Genome NC_045512.2              | (1)      | -----                                                                         |        |        |        |        |        |               |
|                                                      |          | Section 1367                                                                  |        |        |        |        |        |               |
|                                                      | (105183) | 105183                                                                        | 105193 | 105204 | 105215 | 105226 | 105237 | 105248 105259 |
| Candidatus Carsonella ruddii strain BT chromosome... | (105183) | TTTTTTAAATTTAATAAATTTTATTAAATTAACAAATGAAATTTTAATTTCAAATAAAGAACATAATTCAATATTTA |        |        |        |        |        |               |
| Candidatus Carsonella 135557 - 167442nt              | (1)      | -----                                                                         |        |        |        |        |        |               |
| SARS-CoV-2 Reference Genome NC_045512.2              | (1)      | -----                                                                         |        |        |        |        |        |               |
|                                                      |          | Section 1368                                                                  |        |        |        |        |        |               |
|                                                      | (105260) | 105260                                                                        | 105270 | 105281 | 105292 | 105303 | 105314 | 105325 105336 |
| Candidatus Carsonella ruddii strain BT chromosome... | (105260) | TTTCTTTATTACAATTATTTAAATTTAAAAAATTAAAAACAATAATTTTCCAATTTAAACAAAAAATTTTAA      |        |        |        |        |        |               |
| Candidatus Carsonella 135557 - 167442nt              | (1)      | -----                                                                         |        |        |        |        |        |               |
| SARS-CoV-2 Reference Genome NC_045512.2              | (1)      | -----                                                                         |        |        |        |        |        |               |

## SARS-CoV-2 &amp; Bakterien.apr

|                                                      |          |                                                                                |        |        |        |        |                      |
|------------------------------------------------------|----------|--------------------------------------------------------------------------------|--------|--------|--------|--------|----------------------|
|                                                      |          |                                                                                |        |        |        |        | Section 1369         |
|                                                      | (105337) | 105337                                                                         | 105347 | 105358 | 105369 | 105380 | 105391 105402 105413 |
| Candidatus Carsonella ruddii strain BT chromosome... | (105337) | AATATTTTTTTGTAATTATATTAATAATACTTTTTGTTGTATAATAAATCAAATTTCAAATAATTATGGAATTTTAAA |        |        |        |        |                      |
| Candidatus Carsonella 135557 - 167442nt              | (1)      | -----                                                                          |        |        |        |        |                      |
| SARS-CoV-2 Reference Genome NC_045512.2              | (1)      | -----                                                                          |        |        |        |        |                      |
|                                                      |          |                                                                                |        |        |        |        | Section 1370         |
|                                                      | (105414) | 105414                                                                         | 105424 | 105435 | 105446 | 105457 | 105468 105479 105490 |
| Candidatus Carsonella ruddii strain BT chromosome... | (105414) | TCATATTAAACATTTAATAAAAAATTTGTAATTATAACAATATAATTACAATATTAGATTGTACACAATCTATTTCTT |        |        |        |        |                      |
| Candidatus Carsonella 135557 - 167442nt              | (1)      | -----                                                                          |        |        |        |        |                      |
| SARS-CoV-2 Reference Genome NC_045512.2              | (1)      | -----                                                                          |        |        |        |        |                      |
|                                                      |          |                                                                                |        |        |        |        | Section 1371         |
|                                                      | (105491) | 105491                                                                         | 105501 | 105512 | 105523 | 105534 | 105545 105556 105567 |
| Candidatus Carsonella ruddii strain BT chromosome... | (105491) | TTAATAATATAAATATAAAAAAATAAAACCAACTTTTTTATTTTTTCTTTACACAAATTATATTCTTTAACAGGT    |        |        |        |        |                      |
| Candidatus Carsonella 135557 - 167442nt              | (1)      | -----                                                                          |        |        |        |        |                      |
| SARS-CoV-2 Reference Genome NC_045512.2              | (1)      | -----                                                                          |        |        |        |        |                      |
|                                                      |          |                                                                                |        |        |        |        | Section 1372         |
|                                                      | (105568) | 105568                                                                         | 105578 | 105589 | 105600 | 105611 | 105622 105633 105644 |
| Candidatus Carsonella ruddii strain BT chromosome... | (105568) | ATTTCAATTTTATACTATAATATTAATTTTTTATCAAAAATTAAACCGATTTTTGTAGGTGGTGGTTCATCTTATAT  |        |        |        |        |                      |
| Candidatus Carsonella 135557 - 167442nt              | (1)      | -----                                                                          |        |        |        |        |                      |
| SARS-CoV-2 Reference Genome NC_045512.2              | (1)      | -----                                                                          |        |        |        |        |                      |
|                                                      |          |                                                                                |        |        |        |        | Section 1373         |
|                                                      | (105645) | 105645                                                                         | 105655 | 105666 | 105677 | 105688 | 105699 105710 105721 |
| Candidatus Carsonella ruddii strain BT chromosome... | (105645) | TAATAATTATTTAATCAAATATAAAAAATTTAATGAAAAATTTTATTTTGGAAACACAAAAATTTTTTTCTTTATTAT |        |        |        |        |                      |
| Candidatus Carsonella 135557 - 167442nt              | (1)      | -----                                                                          |        |        |        |        |                      |
| SARS-CoV-2 Reference Genome NC_045512.2              | (1)      | -----                                                                          |        |        |        |        |                      |
|                                                      |          |                                                                                |        |        |        |        | Section 1374         |
|                                                      | (105722) | 105722                                                                         | 105732 | 105743 | 105754 | 105765 | 105776 105787 105798 |
| Candidatus Carsonella ruddii strain BT chromosome... | (105722) | CTAGTTATTATTCATTAAAAATGGTTTTTAAAAAATAAAAAATTTATATTTTATATTAATTATTATTTAAAAAAAAT  |        |        |        |        |                      |
| Candidatus Carsonella 135557 - 167442nt              | (1)      | -----                                                                          |        |        |        |        |                      |
| SARS-CoV-2 Reference Genome NC_045512.2              | (1)      | -----                                                                          |        |        |        |        |                      |

## SARS-CoV-2 &amp; Bakterien.apr

|                                                      |          |                                                                                  |        |        |        |        |        |               |
|------------------------------------------------------|----------|----------------------------------------------------------------------------------|--------|--------|--------|--------|--------|---------------|
|                                                      |          | Section 1375                                                                     |        |        |        |        |        |               |
|                                                      | (105799) | 105799                                                                           | 105809 | 105820 | 105831 | 105842 | 105853 | 105864 105875 |
| Candidatus Carsonella ruddii strain BT chromosome... | (105799) | ATTTTTTTTTTATTTTTTAAAAAAAAAAAAATTATTTTTCAAATACTTTATTATTAAAAAATAAAAAATATAGAAAATTT |        |        |        |        |        |               |
| Candidatus Carsonella 135557 - 167442nt              | (1)      | -----                                                                            |        |        |        |        |        |               |
| SARS-CoV-2 Reference Genome NC_045512.2              | (1)      | -----                                                                            |        |        |        |        |        |               |
|                                                      |          | Section 1376                                                                     |        |        |        |        |        |               |
|                                                      | (105876) | 105876                                                                           | 105886 | 105897 | 105908 | 105919 | 105930 | 105941 105952 |
| Candidatus Carsonella ruddii strain BT chromosome... | (105876) | TAATAATTATTTAGATATTAATAAAATAATTTTAAGATGTGATAATTTATGTAATTTTATGAAAAATATGTTTATTA    |        |        |        |        |        |               |
| Candidatus Carsonella 135557 - 167442nt              | (1)      | -----                                                                            |        |        |        |        |        |               |
| SARS-CoV-2 Reference Genome NC_045512.2              | (1)      | -----                                                                            |        |        |        |        |        |               |
|                                                      |          | Section 1377                                                                     |        |        |        |        |        |               |
|                                                      | (105953) | 105953                                                                           | 105963 | 105974 | 105985 | 105996 | 106007 | 106018 106029 |
| Candidatus Carsonella ruddii strain BT chromosome... | (105953) | ACAAAAAAAAAAATTGTAGAATTTCTTTTAAATTTTTTAAATAAATTAAAAGAAATTTTAAAAATAAAATTTTTTAATT  |        |        |        |        |        |               |
| Candidatus Carsonella 135557 - 167442nt              | (1)      | -----                                                                            |        |        |        |        |        |               |
| SARS-CoV-2 Reference Genome NC_045512.2              | (1)      | -----                                                                            |        |        |        |        |        |               |
|                                                      |          | Section 1378                                                                     |        |        |        |        |        |               |
|                                                      | (106030) | 106030                                                                           | 106040 | 106051 | 106062 | 106073 | 106084 | 106095 106106 |
| Candidatus Carsonella ruddii strain BT chromosome... | (106030) | TTTTTTTATAATTTTAGAATTAAAAATTGCTAAATCATTATAAAATAATAATATATTTTTTTCTAAATATTTTTTTT    |        |        |        |        |        |               |
| Candidatus Carsonella 135557 - 167442nt              | (1)      | -----                                                                            |        |        |        |        |        |               |
| SARS-CoV-2 Reference Genome NC_045512.2              | (1)      | -----                                                                            |        |        |        |        |        |               |
|                                                      |          | Section 1379                                                                     |        |        |        |        |        |               |
|                                                      | (106107) | 106107                                                                           | 106117 | 106128 | 106139 | 106150 | 106161 | 106172 106183 |
| Candidatus Carsonella ruddii strain BT chromosome... | (106107) | TTTTATAAAAAACAACAAATTTTTTATTTTTTAAATTTTATTAATTTTCCTATTATTTTAATACTTTGAGATTTTGTT   |        |        |        |        |        |               |
| Candidatus Carsonella 135557 - 167442nt              | (1)      | -----                                                                            |        |        |        |        |        |               |
| SARS-CoV-2 Reference Genome NC_045512.2              | (1)      | -----                                                                            |        |        |        |        |        |               |
|                                                      |          | Section 1380                                                                     |        |        |        |        |        |               |
|                                                      | (106184) | 106184                                                                           | 106194 | 106205 | 106216 | 106227 | 106238 | 106249 106260 |
| Candidatus Carsonella ruddii strain BT chromosome... | (106184) | TTTAAAAAATATTTATATTATTACATAAAAAATTAAATTTTAAATTTTAAAAAATAAATTTTTATTTTTTATAAT      |        |        |        |        |        |               |
| Candidatus Carsonella 135557 - 167442nt              | (1)      | -----                                                                            |        |        |        |        |        |               |
| SARS-CoV-2 Reference Genome NC_045512.2              | (1)      | -----                                                                            |        |        |        |        |        |               |

|                                                      |          |                                                                                  |        |        |        |        |        |        |              |
|------------------------------------------------------|----------|----------------------------------------------------------------------------------|--------|--------|--------|--------|--------|--------|--------------|
|                                                      |          |                                                                                  |        |        |        |        |        |        | Section 1381 |
|                                                      | (106261) | 106261                                                                           | 106271 | 106282 | 106293 | 106304 | 106315 | 106326 | 106337       |
| Candidatus Carsonella ruddii strain BT chromosome... | (106261) | ATAAATATTATTTTTTTTTTATTTTAATAATTTTAAAAAAAAATAATTTTTTTTCTAAATTTAAATAATTTTTTAGTTT  |        |        |        |        |        |        |              |
| Candidatus Carsonella 135557 - 167442nt              | (1)      | -----                                                                            |        |        |        |        |        |        |              |
| SARS-CoV-2 Reference Genome NC_045512.2              | (1)      | -----                                                                            |        |        |        |        |        |        |              |
|                                                      |          |                                                                                  |        |        |        |        |        |        | Section 1382 |
|                                                      | (106338) | 106338                                                                           | 106348 | 106359 | 106370 | 106381 | 106392 | 106403 | 106414       |
| Candidatus Carsonella ruddii strain BT chromosome... | (106338) | TTAAATATTAAAAATCATTTTATTTTCTAATATAAAAAATAAAAAGTTTTTTTTTATTTTTAAATTTAAACAAATA     |        |        |        |        |        |        |              |
| Candidatus Carsonella 135557 - 167442nt              | (1)      | -----                                                                            |        |        |        |        |        |        |              |
| SARS-CoV-2 Reference Genome NC_045512.2              | (1)      | -----                                                                            |        |        |        |        |        |        |              |
|                                                      |          |                                                                                  |        |        |        |        |        |        | Section 1383 |
|                                                      | (106415) | 106415                                                                           | 106425 | 106436 | 106447 | 106458 | 106469 | 106480 | 106491       |
| Candidatus Carsonella ruddii strain BT chromosome... | (106415) | CCTGTAGTACTTTTTTTTATTTTGCATAAAAAATTATTTTTAAATTTAAAAAATTAATATAAAATTTATTATAATA     |        |        |        |        |        |        |              |
| Candidatus Carsonella 135557 - 167442nt              | (1)      | -----                                                                            |        |        |        |        |        |        |              |
| SARS-CoV-2 Reference Genome NC_045512.2              | (1)      | -----                                                                            |        |        |        |        |        |        |              |
|                                                      |          |                                                                                  |        |        |        |        |        |        | Section 1384 |
|                                                      | (106492) | 106492                                                                           | 106502 | 106513 | 106524 | 106535 | 106546 | 106557 | 106568       |
| Candidatus Carsonella ruddii strain BT chromosome... | (106492) | ACCTATAAAAGAATAAATATTATTTTTTAAATTTAAAAAAAAAATTTGATCTTTTTTTTGTATCATTTGAAGAAATAA   |        |        |        |        |        |        |              |
| Candidatus Carsonella 135557 - 167442nt              | (1)      | -----                                                                            |        |        |        |        |        |        |              |
| SARS-CoV-2 Reference Genome NC_045512.2              | (1)      | -----                                                                            |        |        |        |        |        |        |              |
|                                                      |          |                                                                                  |        |        |        |        |        |        | Section 1385 |
|                                                      | (106569) | 106569                                                                           | 106579 | 106590 | 106601 | 106612 | 106623 | 106634 | 106645       |
| Candidatus Carsonella ruddii strain BT chromosome... | (106569) | AAAATTTTTTTTATTTTTTTTAAAAATAATGACCAGTAAATATAATTTTTTTTTTATAAATTTTTTTAATTAAATAAATT |        |        |        |        |        |        |              |
| Candidatus Carsonella 135557 - 167442nt              | (1)      | -----                                                                            |        |        |        |        |        |        |              |
| SARS-CoV-2 Reference Genome NC_045512.2              | (1)      | -----                                                                            |        |        |        |        |        |        |              |
|                                                      |          |                                                                                  |        |        |        |        |        |        | Section 1386 |
|                                                      | (106646) | 106646                                                                           | 106656 | 106667 | 106678 | 106689 | 106700 | 106711 | 106722       |
| Candidatus Carsonella ruddii strain BT chromosome... | (106646) | TTAATTAATTTATTACAATAAAAAATCTATATTTATATTTTTTAAAAATAAAATAATTTAAATTTTTTTTATATTCTAA  |        |        |        |        |        |        |              |
| Candidatus Carsonella 135557 - 167442nt              | (1)      | -----                                                                            |        |        |        |        |        |        |              |
| SARS-CoV-2 Reference Genome NC_045512.2              | (1)      | -----                                                                            |        |        |        |        |        |        |              |

## SARS-CoV-2 &amp; Bakterien.apr

|                                                      |          |                                                                               |        |        |        |        |        |              |        |
|------------------------------------------------------|----------|-------------------------------------------------------------------------------|--------|--------|--------|--------|--------|--------------|--------|
|                                                      |          |                                                                               |        |        |        |        |        | Section 1387 |        |
|                                                      | (106723) | 106723                                                                        | 106733 | 106744 | 106755 | 106766 | 106777 | 106788       | 106799 |
| Candidatus Carsonella ruddii strain BT chromosome... | (106723) | TTTTAAATTAATTGAAAATAATTTTTTATTTAAATTTTAAATATTTAAAATTGAATATTTTTTATCAATATAATTAT |        |        |        |        |        |              |        |
| Candidatus Carsonella 135557 - 167442nt              | (1)      | -----                                                                         |        |        |        |        |        |              |        |
| SARS-CoV-2 Reference Genome NC_045512.2              | (1)      | -----                                                                         |        |        |        |        |        |              |        |
|                                                      |          |                                                                               |        |        |        |        |        | Section 1388 |        |
|                                                      | (106800) | 106800                                                                        | 106810 | 106821 | 106832 | 106843 | 106854 | 106865       | 106876 |
| Candidatus Carsonella ruddii strain BT chromosome... | (106800) | TACAATTGTTAATTTTTATAAATAAATTATAATGATTAAAATTATAACAACAAAAATTTGAATCTTTTCCTCCAGAA |        |        |        |        |        |              |        |
| Candidatus Carsonella 135557 - 167442nt              | (1)      | -----                                                                         |        |        |        |        |        |              |        |
| SARS-CoV-2 Reference Genome NC_045512.2              | (1)      | -----                                                                         |        |        |        |        |        |              |        |
|                                                      |          |                                                                               |        |        |        |        |        | Section 1389 |        |
|                                                      | (106877) | 106877                                                                        | 106887 | 106898 | 106909 | 106920 | 106931 | 106942       | 106953 |
| Candidatus Carsonella ruddii strain BT chromosome... | (106877) | ATTAACAATATATTATACATTATAATCTATGTATAATTCTTCCTTTAGTTAAATCATAATAAGAAATTAAAATTTTA |        |        |        |        |        |              |        |
| Candidatus Carsonella 135557 - 167442nt              | (1)      | -----                                                                         |        |        |        |        |        |              |        |
| SARS-CoV-2 Reference Genome NC_045512.2              | (1)      | -----                                                                         |        |        |        |        |        |              |        |
|                                                      |          |                                                                               |        |        |        |        |        | Section 1390 |        |
|                                                      | (106954) | 106954                                                                        | 106964 | 106975 | 106986 | 106997 | 107008 | 107019       | 107030 |
| Candidatus Carsonella ruddii strain BT chromosome... | (106954) | ACTCTATCTCCTATCATTATTTTTATAAAATTTTTTCTAATTTTCTGAAATATAAGAATTTATTA AAAAACCAT   |        |        |        |        |        |              |        |
| Candidatus Carsonella 135557 - 167442nt              | (1)      | -----                                                                         |        |        |        |        |        |              |        |
| SARS-CoV-2 Reference Genome NC_045512.2              | (1)      | -----                                                                         |        |        |        |        |        |              |        |
|                                                      |          |                                                                               |        |        |        |        |        | Section 1391 |        |
|                                                      | (107031) | 107031                                                                        | 107041 | 107052 | 107063 | 107074 | 107085 | 107096       | 107107 |
| Candidatus Carsonella ruddii strain BT chromosome... | (107031) | TTCTAATTTTACTTTAAAGTAGCATTAGGCATTGTATTGATAACAACACCTTCCATTTCAAATACATTATTATTC   |        |        |        |        |        |              |        |
| Candidatus Carsonella 135557 - 167442nt              | (1)      | -----                                                                         |        |        |        |        |        |              |        |
| SARS-CoV-2 Reference Genome NC_045512.2              | (1)      | -----                                                                         |        |        |        |        |        |              |        |
|                                                      |          |                                                                               |        |        |        |        |        | Section 1392 |        |
|                                                      | (107108) | 107108                                                                        | 107118 | 107129 | 107140 | 107151 | 107162 | 107173       | 107184 |
| Candidatus Carsonella ruddii strain BT chromosome... | (107108) | TTTTAAAAATAAATTATATATTAAATATGTCTCGTTCGTCTATAGGTAGGACCTTGCTCTTTCACGGCGAAAAAAG  |        |        |        |        |        |              |        |
| Candidatus Carsonella 135557 - 167442nt              | (1)      | -----                                                                         |        |        |        |        |        |              |        |
| SARS-CoV-2 Reference Genome NC_045512.2              | (1)      | -----                                                                         |        |        |        |        |        |              |        |



## SARS-CoV-2 &amp; Bakterien.apr

|                                                      |          |                                                                                   |        |        |        |        |                      |
|------------------------------------------------------|----------|-----------------------------------------------------------------------------------|--------|--------|--------|--------|----------------------|
|                                                      |          |                                                                                   |        |        |        |        | Section 1393         |
|                                                      | (107185) | 107185                                                                            | 107195 | 107206 | 107217 | 107228 | 107239 107250 107261 |
| Candidatus Carsonella ruddii strain BT chromosome... | (107185) | GGTTTCGAATCCCTTACGAGATAGCGAAAGTATCTTAATGGTAAAGTATCACCTTGCCATGGTGAAAGTTGCGAGTTC    |        |        |        |        |                      |
| Candidatus Carsonella 135557 - 167442nt              | (1)      | -----                                                                             |        |        |        |        |                      |
| SARS-CoV-2 Reference Genome NC_045512.2              | (1)      | -----                                                                             |        |        |        |        |                      |
|                                                      |          |                                                                                   |        |        |        |        | Section 1394         |
|                                                      | (107262) | 107262                                                                            | 107272 | 107283 | 107294 | 107305 | 107316 107327 107338 |
| Candidatus Carsonella ruddii strain BT chromosome... | (107262) | AATTCTCGTCTTTTCGCTAGAGATATGTCTGAGCGGTTTAAAGAATATGCTTGGAAAGCATAGAAAGCTTTTGCTTTC    |        |        |        |        |                      |
| Candidatus Carsonella 135557 - 167442nt              | (1)      | -----                                                                             |        |        |        |        |                      |
| SARS-CoV-2 Reference Genome NC_045512.2              | (1)      | -----                                                                             |        |        |        |        |                      |
|                                                      |          |                                                                                   |        |        |        |        | Section 1395         |
|                                                      | (107339) | 107339                                                                            | 107349 | 107360 | 107371 | 107382 | 107393 107404 107415 |
| Candidatus Carsonella ruddii strain BT chromosome... | (107339) | ATGGGGTTCGAATCCCATTATCTCTTAAATAAAAAATATTTCTTTTAAATATCTTTAATTGAAACCAAACCATTTAA     |        |        |        |        |                      |
| Candidatus Carsonella 135557 - 167442nt              | (1)      | -----                                                                             |        |        |        |        |                      |
| SARS-CoV-2 Reference Genome NC_045512.2              | (1)      | -----                                                                             |        |        |        |        |                      |
|                                                      |          |                                                                                   |        |        |        |        | Section 1396         |
|                                                      | (107416) | 107416                                                                            | 107426 | 107437 | 107448 | 107459 | 107470 107481 107492 |
| Candidatus Carsonella ruddii strain BT chromosome... | (107416) | TATTATTTTATTTTAAAAATCAAAAATAATAGTAGGAATTACTCTAATTCCCTAATTCAATAGAAATATTTTGTATGAT   |        |        |        |        |                      |
| Candidatus Carsonella 135557 - 167442nt              | (1)      | -----                                                                             |        |        |        |        |                      |
| SARS-CoV-2 Reference Genome NC_045512.2              | (1)      | -----                                                                             |        |        |        |        |                      |
|                                                      |          |                                                                                   |        |        |        |        | Section 1397         |
|                                                      | (107493) | 107493                                                                            | 107503 | 107514 | 107525 | 107536 | 107547 107558 107569 |
| Candidatus Carsonella ruddii strain BT chromosome... | (107493) | AATCAATATTTATTTAAAAAAAATAATATATTTATTTTTTTTTTCAATTTTTTTTTTAATTTTTTTTTTAATATATTACAA |        |        |        |        |                      |
| Candidatus Carsonella 135557 - 167442nt              | (1)      | -----                                                                             |        |        |        |        |                      |
| SARS-CoV-2 Reference Genome NC_045512.2              | (1)      | -----                                                                             |        |        |        |        |                      |
|                                                      |          |                                                                                   |        |        |        |        | Section 1398         |
|                                                      | (107570) | 107570                                                                            | 107580 | 107591 | 107602 | 107613 | 107624 107635 107646 |
| Candidatus Carsonella ruddii strain BT chromosome... | (107570) | GGACTACACCAATTTGCTGTAAAACTAAAAATTTTTTTTTTTATTGTTTATTTTTTTTAATATATTATTTTAAACAAT    |        |        |        |        |                      |
| Candidatus Carsonella 135557 - 167442nt              | (1)      | -----                                                                             |        |        |        |        |                      |
| SARS-CoV-2 Reference Genome NC_045512.2              | (1)      | -----                                                                             |        |        |        |        |                      |

## SARS-CoV-2 &amp; Bakterien.apr

|                                                      |          |                                                                                 |        |        |        |        |        |
|------------------------------------------------------|----------|---------------------------------------------------------------------------------|--------|--------|--------|--------|--------|
| Section 1399                                         |          |                                                                                 |        |        |        |        |        |
| Candidatus Carsonella ruddii strain BT chromosome... | (107647) | 107647                                                                          | 107657 | 107668 | 107679 | 107690 | 107701 |
| Candidatus Carsonella 135557 - 167442nt              | (107647) | TATCATATAAAATTTTATAAAATGATTACCAAATAATTTCTTTCAAATTGAATTAATTTAAATTTGTAATTTCTATA   |        |        |        |        |        |
| SARS-CoV-2 Reference Genome NC_045512.2              | (1)      | -----                                                                           |        |        |        |        |        |
| Section 1400                                         |          |                                                                                 |        |        |        |        |        |
| Candidatus Carsonella ruddii strain BT chromosome... | (107724) | 107724                                                                          | 107734 | 107745 | 107756 | 107767 | 107778 |
| Candidatus Carsonella 135557 - 167442nt              | (107724) | ATAAATAATTAATAAAAAATTGTAACAAGATAAAATATTAATAATTAACAAATTTAATTTTAATAAAATAGTAATAA   |        |        |        |        |        |
| SARS-CoV-2 Reference Genome NC_045512.2              | (1)      | -----                                                                           |        |        |        |        |        |
| Section 1401                                         |          |                                                                                 |        |        |        |        |        |
| Candidatus Carsonella ruddii strain BT chromosome... | (107801) | 107801                                                                          | 107811 | 107822 | 107833 | 107844 | 107855 |
| Candidatus Carsonella 135557 - 167442nt              | (107801) | TTTTTTTAATTAAATGAATTTTTTTTTTAAATAAAATAAAAAATATTTTATTAAAAAAAAGTTTTTTTTTAAATTTAAC |        |        |        |        |        |
| SARS-CoV-2 Reference Genome NC_045512.2              | (1)      | -----                                                                           |        |        |        |        |        |
| Section 1402                                         |          |                                                                                 |        |        |        |        |        |
| Candidatus Carsonella ruddii strain BT chromosome... | (107878) | 107878                                                                          | 107888 | 107899 | 107910 | 107921 | 107932 |
| Candidatus Carsonella 135557 - 167442nt              | (107878) | AAATAAAATAATATATTAGAATCAATTATACAACGTGTTAAATAAGTTTTTATTAAATTAGAAAAATTAATTTTCCA   |        |        |        |        |        |
| SARS-CoV-2 Reference Genome NC_045512.2              | (1)      | -----                                                                           |        |        |        |        |        |
| Section 1403                                         |          |                                                                                 |        |        |        |        |        |
| Candidatus Carsonella ruddii strain BT chromosome... | (107955) | 107955                                                                          | 107965 | 107976 | 107987 | 107998 | 108009 |
| Candidatus Carsonella 135557 - 167442nt              | (107955) | ATTATATTTTTTTTGAAATTTTTATTAAATTGATTGAAACCTTGAATATAACATAATAATTTAGAAATAAAAAAAACAT |        |        |        |        |        |
| SARS-CoV-2 Reference Genome NC_045512.2              | (1)      | -----                                                                           |        |        |        |        |        |
| Section 1404                                         |          |                                                                                 |        |        |        |        |        |
| Candidatus Carsonella ruddii strain BT chromosome... | (108032) | 108032                                                                          | 108042 | 108053 | 108064 | 108075 | 108086 |
| Candidatus Carsonella 135557 - 167442nt              | (108032) | TTTTTATCATTTCTAAAAATATTGATATTTTAATTTTAATTTTATATTATTATTATATTTTAATATATTTCTTAA     |        |        |        |        |        |
| SARS-CoV-2 Reference Genome NC_045512.2              | (1)      | -----                                                                           |        |        |        |        |        |

## SARS-CoV-2 &amp; Bakterien.apr

|                                                      |          |                                                                                 |        |        |        |        |        |               |
|------------------------------------------------------|----------|---------------------------------------------------------------------------------|--------|--------|--------|--------|--------|---------------|
|                                                      |          | Section 1405                                                                    |        |        |        |        |        |               |
|                                                      | (108109) | 108109                                                                          | 108119 | 108130 | 108141 | 108152 | 108163 | 108174 108185 |
| Candidatus Carsonella ruddii strain BT chromosome... | (108109) | AAAATATTTTTAGATATAATTCTTATTATTAATGCTTCAAAAATTGAATTAATATTAATATTATTTTTAATTGAATT   |        |        |        |        |        |               |
| Candidatus Carsonella 135557 - 167442nt              | (1)      | -----                                                                           |        |        |        |        |        |               |
| SARS-CoV-2 Reference Genome NC_045512.2              | (1)      | -----                                                                           |        |        |        |        |        |               |
|                                                      |          | Section 1406                                                                    |        |        |        |        |        |               |
|                                                      | (108186) | 108186                                                                          | 108196 | 108207 | 108218 | 108229 | 108240 | 108251 108262 |
| Candidatus Carsonella ruddii strain BT chromosome... | (108186) | TAATACTGTATTACTTCCTGTACCTTTATGATCAATAATATCATTAATATATAATTTTTTTTTTTATTAAAAATATTAA |        |        |        |        |        |               |
| Candidatus Carsonella 135557 - 167442nt              | (1)      | -----                                                                           |        |        |        |        |        |               |
| SARS-CoV-2 Reference Genome NC_045512.2              | (1)      | -----                                                                           |        |        |        |        |        |               |
|                                                      |          | Section 1407                                                                    |        |        |        |        |        |               |
|                                                      | (108263) | 108263                                                                          | 108273 | 108284 | 108295 | 108306 | 108317 | 108328 108339 |
| Candidatus Carsonella ruddii strain BT chromosome... | (108263) | ATAATATTTTTAATAAATAACAAGAAAAATCAGTTTTATTCCAATTTATTAATATATTAATTATTTTTTTTTTTTTTT  |        |        |        |        |        |               |
| Candidatus Carsonella 135557 - 167442nt              | (1)      | -----                                                                           |        |        |        |        |        |               |
| SARS-CoV-2 Reference Genome NC_045512.2              | (1)      | -----                                                                           |        |        |        |        |        |               |
|                                                      |          | Section 1408                                                                    |        |        |        |        |        |               |
|                                                      | (108340) | 108340                                                                          | 108350 | 108361 | 108372 | 108383 | 108394 | 108405 108416 |
| Candidatus Carsonella ruddii strain BT chromosome... | (108340) | ATTATAAAAACTTTTAATATATAATATATTTCTGATATTAATTGTAATATTCCATATTCAATTCCATTATGAATCAT   |        |        |        |        |        |               |
| Candidatus Carsonella 135557 - 167442nt              | (1)      | -----                                                                           |        |        |        |        |        |               |
| SARS-CoV-2 Reference Genome NC_045512.2              | (1)      | -----                                                                           |        |        |        |        |        |               |
|                                                      |          | Section 1409                                                                    |        |        |        |        |        |               |
|                                                      | (108417) | 108417                                                                          | 108427 | 108438 | 108449 | 108460 | 108471 | 108482 108493 |
| Candidatus Carsonella ruddii strain BT chromosome... | (108417) | TTTAATAAAATGAGAACTAGCAAAACCTAAGGTTATACAACAACCTAAATCTTTTTTTTTTTAAAAAAAATGTTTT    |        |        |        |        |        |               |
| Candidatus Carsonella 135557 - 167442nt              | (1)      | -----                                                                           |        |        |        |        |        |               |
| SARS-CoV-2 Reference Genome NC_045512.2              | (1)      | -----                                                                           |        |        |        |        |        |               |
|                                                      |          | Section 1410                                                                    |        |        |        |        |        |               |
|                                                      | (108494) | 108494                                                                          | 108504 | 108515 | 108526 | 108537 | 108548 | 108559 108570 |
| Candidatus Carsonella ruddii strain BT chromosome... | (108494) | TTAATAAAAAAATAATTTTTTATAATCTTTATTAAACAATCTATCATACAACACAAACCATTAAAGCTCCTAAA      |        |        |        |        |        |               |
| Candidatus Carsonella 135557 - 167442nt              | (1)      | -----                                                                           |        |        |        |        |        |               |
| SARS-CoV-2 Reference Genome NC_045512.2              | (1)      | -----                                                                           |        |        |        |        |        |               |

## SARS-CoV-2 &amp; Bakterien.apr

|                                                      |          |                                                                                |        |        |        |        |        |               |
|------------------------------------------------------|----------|--------------------------------------------------------------------------------|--------|--------|--------|--------|--------|---------------|
|                                                      |          | Section 1411                                                                   |        |        |        |        |        |               |
|                                                      | (108571) | 108571                                                                         | 108581 | 108592 | 108603 | 108614 | 108625 | 108636 108647 |
| Candidatus Carsonella ruddii strain BT chromosome... | (108571) | CATCCACCTGATATTCCAGAAGAAATAAAAAATAAATTTTTTGTAGTAATTTTATAAATTTAAAAATGTTTCTTTAAA |        |        |        |        |        |               |
| Candidatus Carsonella 135557 - 167442nt              | (1)      | -----                                                                          |        |        |        |        |        |               |
| SARS-CoV-2 Reference Genome NC_045512.2              | (1)      | -----                                                                          |        |        |        |        |        |               |
|                                                      |          | Section 1412                                                                   |        |        |        |        |        |               |
|                                                      | (108648) | 108648                                                                         | 108658 | 108669 | 108680 | 108691 | 108702 | 108713 108724 |
| Candidatus Carsonella ruddii strain BT chromosome... | (108648) | AAAAGAATTTCCAAAATCAATAACAATATCATTTTTAGATAATTTATATTTTAATCTTAAAAATTATTTTTTTAATAG |        |        |        |        |        |               |
| Candidatus Carsonella 135557 - 167442nt              | (1)      | -----                                                                          |        |        |        |        |        |               |
| SARS-CoV-2 Reference Genome NC_045512.2              | (1)      | -----                                                                          |        |        |        |        |        |               |
|                                                      |          | Section 1413                                                                   |        |        |        |        |        |               |
|                                                      | (108725) | 108725                                                                         | 108735 | 108746 | 108757 | 108768 | 108779 | 108790 108801 |
| Candidatus Carsonella ruddii strain BT chromosome... | (108725) | GTTTTCTGTGTTTAAATTAATAAAAAATAAATTTTTTTAATGGTAAAGAAAAAGAAATTTTTTAAACAATTAGTA    |        |        |        |        |        |               |
| Candidatus Carsonella 135557 - 167442nt              | (1)      | -----                                                                          |        |        |        |        |        |               |
| SARS-CoV-2 Reference Genome NC_045512.2              | (1)      | -----                                                                          |        |        |        |        |        |               |
|                                                      |          | Section 1414                                                                   |        |        |        |        |        |               |
|                                                      | (108802) | 108802                                                                         | 108812 | 108823 | 108834 | 108845 | 108856 | 108867 108878 |
| Candidatus Carsonella ruddii strain BT chromosome... | (108802) | ATTATTTGTATATTATATATTTTTAAATTTAAAAATAATTTTTTCTTTATTAAAAATTGAAATAATATTATCTTTTTT |        |        |        |        |        |               |
| Candidatus Carsonella 135557 - 167442nt              | (1)      | -----                                                                          |        |        |        |        |        |               |
| SARS-CoV-2 Reference Genome NC_045512.2              | (1)      | -----                                                                          |        |        |        |        |        |               |
|                                                      |          | Section 1415                                                                   |        |        |        |        |        |               |
|                                                      | (108879) | 108879                                                                         | 108889 | 108900 | 108911 | 108922 | 108933 | 108944 108955 |
| Candidatus Carsonella ruddii strain BT chromosome... | (108879) | AATAAGATTAATAGTAATATTTTTGGACATTGATCCATAACCTATTATTCCAATATGATTTTTCATAAATTTAAAAA  |        |        |        |        |        |               |
| Candidatus Carsonella 135557 - 167442nt              | (1)      | -----                                                                          |        |        |        |        |        |               |
| SARS-CoV-2 Reference Genome NC_045512.2              | (1)      | -----                                                                          |        |        |        |        |        |               |
|                                                      |          | Section 1416                                                                   |        |        |        |        |        |               |
|                                                      | (108956) | 108956                                                                         | 108966 | 108977 | 108988 | 108999 | 109010 | 109021 109032 |
| Candidatus Carsonella ruddii strain BT chromosome... | (108956) | AATTTTAATATTTAAAAAATTTAAAATAAATTCATTCGTAAACAAATTTGTAAAAAATTTTTTTGTTTAAAAA      |        |        |        |        |        |               |
| Candidatus Carsonella 135557 - 167442nt              | (1)      | -----                                                                          |        |        |        |        |        |               |
| SARS-CoV-2 Reference Genome NC_045512.2              | (1)      | -----                                                                          |        |        |        |        |        |               |

## SARS-CoV-2 &amp; Bakterien.apr

|                                                      |          |                                                                                |        |        |        |        |        |               |
|------------------------------------------------------|----------|--------------------------------------------------------------------------------|--------|--------|--------|--------|--------|---------------|
|                                                      |          | Section 1417                                                                   |        |        |        |        |        |               |
|                                                      | (109033) | 109033                                                                         | 109043 | 109054 | 109065 | 109076 | 109087 | 109098 109109 |
| Candidatus Carsonella ruddii strain BT chromosome... | (109033) | AACAAAATATTATTTTTGTATCAAATTATTTAATAATAAATATATTTTTTAATAATATATATATATAATAATAAA    |        |        |        |        |        |               |
| Candidatus Carsonella 135557 - 167442nt              | (1)      | -----                                                                          |        |        |        |        |        |               |
| SARS-CoV-2 Reference Genome NC_045512.2              | (1)      | -----                                                                          |        |        |        |        |        |               |
|                                                      |          | Section 1418                                                                   |        |        |        |        |        |               |
|                                                      | (109110) | 109110                                                                         | 109120 | 109131 | 109142 | 109153 | 109164 | 109175 109186 |
| Candidatus Carsonella ruddii strain BT chromosome... | (109110) | AAAACATAATATCTAATAATATTAATCATTATATTAAAAAAAAAATTACAACAATAAAAAAAAAATTTAGATTTTT   |        |        |        |        |        |               |
| Candidatus Carsonella 135557 - 167442nt              | (1)      | -----                                                                          |        |        |        |        |        |               |
| SARS-CoV-2 Reference Genome NC_045512.2              | (1)      | -----                                                                          |        |        |        |        |        |               |
|                                                      |          | Section 1419                                                                   |        |        |        |        |        |               |
|                                                      | (109187) | 109187                                                                         | 109197 | 109208 | 109219 | 109230 | 109241 | 109252 109263 |
| Candidatus Carsonella ruddii strain BT chromosome... | (109187) | ATTTTCCTTTTTTAATTTTATTAATTTTAAATTTTTTAAAAAAAAATTTAAAAAGTATAAAAAATATAAAAAATTTGT |        |        |        |        |        |               |
| Candidatus Carsonella 135557 - 167442nt              | (1)      | -----                                                                          |        |        |        |        |        |               |
| SARS-CoV-2 Reference Genome NC_045512.2              | (1)      | -----                                                                          |        |        |        |        |        |               |
|                                                      |          | Section 1420                                                                   |        |        |        |        |        |               |
|                                                      | (109264) | 109264                                                                         | 109274 | 109285 | 109296 | 109307 | 109318 | 109329 109340 |
| Candidatus Carsonella ruddii strain BT chromosome... | (109264) | TTTTTTTTCCAAAAAATGTTTTTTTTTTAAAAAAAAAATAAAATTATTTATTTATTTAGTATTATTAAAAATAAT    |        |        |        |        |        |               |
| Candidatus Carsonella 135557 - 167442nt              | (1)      | -----                                                                          |        |        |        |        |        |               |
| SARS-CoV-2 Reference Genome NC_045512.2              | (1)      | -----                                                                          |        |        |        |        |        |               |
|                                                      |          | Section 1421                                                                   |        |        |        |        |        |               |
|                                                      | (109341) | 109341                                                                         | 109351 | 109362 | 109373 | 109384 | 109395 | 109406 109417 |
| Candidatus Carsonella ruddii strain BT chromosome... | (109341) | ACAATTTTAATATTTTTTCAAATTTTAAATTTTTTTTTTATTGAAAAATAAAAAATCTTTTTTAAATAAAAAATGT   |        |        |        |        |        |               |
| Candidatus Carsonella 135557 - 167442nt              | (1)      | -----                                                                          |        |        |        |        |        |               |
| SARS-CoV-2 Reference Genome NC_045512.2              | (1)      | -----                                                                          |        |        |        |        |        |               |
|                                                      |          | Section 1422                                                                   |        |        |        |        |        |               |
|                                                      | (109418) | 109418                                                                         | 109428 | 109439 | 109450 | 109461 | 109472 | 109483 109494 |
| Candidatus Carsonella ruddii strain BT chromosome... | (109418) | TATTAAAAAATATTAATATTAATTTTTTTATTAAAAAATAATTTTTTTTAAAAATATTTGTAAAAATAAAAAA      |        |        |        |        |        |               |
| Candidatus Carsonella 135557 - 167442nt              | (1)      | -----                                                                          |        |        |        |        |        |               |
| SARS-CoV-2 Reference Genome NC_045512.2              | (1)      | -----                                                                          |        |        |        |        |        |               |

## SARS-CoV-2 &amp; Bakterien.apr

|                                                      |          |                                                                               |        |        |        |        |        |               |
|------------------------------------------------------|----------|-------------------------------------------------------------------------------|--------|--------|--------|--------|--------|---------------|
|                                                      |          | Section 1423                                                                  |        |        |        |        |        |               |
|                                                      | (109495) | 109495                                                                        | 109505 | 109516 | 109527 | 109538 | 109549 | 109560 109571 |
| Candidatus Carsonella ruddii strain BT chromosome... | (109495) | ATATTAATATAGGAAATTTAATTCAATGTGTAATTTCTAACATTTTAATAATAAAGAATTTAAAAAATAAAAAATA  |        |        |        |        |        |               |
| Candidatus Carsonella 135557 - 167442nt              | (1)      | -----                                                                         |        |        |        |        |        |               |
| SARS-CoV-2 Reference Genome NC_045512.2              | (1)      | -----                                                                         |        |        |        |        |        |               |
|                                                      |          | Section 1424                                                                  |        |        |        |        |        |               |
|                                                      | (109572) | 109572                                                                        | 109582 | 109593 | 109604 | 109615 | 109626 | 109637 109648 |
| Candidatus Carsonella ruddii strain BT chromosome... | (109572) | ATTAATAAAACATATTATAATTTTTATTAAATTATAAAAAATTAATAATATTATTAAATTCCTGAATTTTAAAT    |        |        |        |        |        |               |
| Candidatus Carsonella 135557 - 167442nt              | (1)      | -----                                                                         |        |        |        |        |        |               |
| SARS-CoV-2 Reference Genome NC_045512.2              | (1)      | -----                                                                         |        |        |        |        |        |               |
|                                                      |          | Section 1425                                                                  |        |        |        |        |        |               |
|                                                      | (109649) | 109649                                                                        | 109659 | 109670 | 109681 | 109692 | 109703 | 109714 109725 |
| Candidatus Carsonella ruddii strain BT chromosome... | (109649) | AAGAAAAGAAAACAATAAATATTATACAAAACCAATAGCAGGAACAACAGATACTAATTTTAATTTTTTAAAAATTT |        |        |        |        |        |               |
| Candidatus Carsonella 135557 - 167442nt              | (1)      | -----                                                                         |        |        |        |        |        |               |
| SARS-CoV-2 Reference Genome NC_045512.2              | (1)      | -----                                                                         |        |        |        |        |        |               |
|                                                      |          | Section 1426                                                                  |        |        |        |        |        |               |
|                                                      | (109726) | 109726                                                                        | 109736 | 109747 | 109758 | 109769 | 109780 | 109791 109802 |
| Candidatus Carsonella ruddii strain BT chromosome... | (109726) | TAAAAAATAAAAAAGAATTATCAGAACATTTAATGTTATTAGATTTAAGTTTAAATGATGTTTTTAAAAATAATATT |        |        |        |        |        |               |
| Candidatus Carsonella 135557 - 167442nt              | (1)      | -----                                                                         |        |        |        |        |        |               |
| SARS-CoV-2 Reference Genome NC_045512.2              | (1)      | -----                                                                         |        |        |        |        |        |               |
|                                                      |          | Section 1427                                                                  |        |        |        |        |        |               |
|                                                      | (109803) | 109803                                                                        | 109813 | 109824 | 109835 | 109846 | 109857 | 109868 109879 |
| Candidatus Carsonella ruddii strain BT chromosome... | (109803) | AAATTATTTTTTTTTAAAAAAATGTTTTATTGTGAAAAAATAAAAGTTTAACTCATATTATATCTGAAATATTTTT  |        |        |        |        |        |               |
| Candidatus Carsonella 135557 - 167442nt              | (1)      | -----                                                                         |        |        |        |        |        |               |
| SARS-CoV-2 Reference Genome NC_045512.2              | (1)      | -----                                                                         |        |        |        |        |        |               |
|                                                      |          | Section 1428                                                                  |        |        |        |        |        |               |
|                                                      | (109880) | 109880                                                                        | 109890 | 109901 | 109912 | 109923 | 109934 | 109945 109956 |
| Candidatus Carsonella ruddii strain BT chromosome... | (109880) | TAAAAATTATAAAAAAATAATTTATTTTTATTAGAAAAATTTTTCCCAGCTGGTACTTTATCTGGTACTCCTAAAA  |        |        |        |        |        |               |
| Candidatus Carsonella 135557 - 167442nt              | (1)      | -----                                                                         |        |        |        |        |        |               |
| SARS-CoV-2 Reference Genome NC_045512.2              | (1)      | -----                                                                         |        |        |        |        |        |               |

|                                                      |          |                                                                                 |        |        |        |        |        |               |
|------------------------------------------------------|----------|---------------------------------------------------------------------------------|--------|--------|--------|--------|--------|---------------|
|                                                      |          | Section 1429                                                                    |        |        |        |        |        |               |
|                                                      | (109957) | 109957                                                                          | 109967 | 109978 | 109989 | 110000 | 110011 | 110022 110033 |
| Candidatus Carsonella ruddii strain BT chromosome... | (109957) | ATGATTGTATAAAAAATAATCAATATAATAGAAAAACAAAATAGATTTTATATGGTGGTGTTTTAAATTTTTTTAAT   |        |        |        |        |        |               |
| Candidatus Carsonella 135557 - 167442nt              | (1)      | -----                                                                           |        |        |        |        |        |               |
| SARS-CoV-2 Reference Genome NC_045512.2              | (1)      | -----                                                                           |        |        |        |        |        |               |
|                                                      |          | Section 1430                                                                    |        |        |        |        |        |               |
|                                                      | (110034) | 110034                                                                          | 110044 | 110055 | 110066 | 110077 | 110088 | 110099 110110 |
| Candidatus Carsonella ruddii strain BT chromosome... | (110034) | AAAAATCATATAGAATCTTGTTATTTTAATAAGAATAAAAAATTTTTTTTTTAAACAATATTTATTAGAAATCAGGTGC |        |        |        |        |        |               |
| Candidatus Carsonella 135557 - 167442nt              | (1)      | -----                                                                           |        |        |        |        |        |               |
| SARS-CoV-2 Reference Genome NC_045512.2              | (1)      | -----                                                                           |        |        |        |        |        |               |
|                                                      |          | Section 1431                                                                    |        |        |        |        |        |               |
|                                                      | (110111) | 110111                                                                          | 110121 | 110132 | 110143 | 110154 | 110165 | 110176 110187 |
| Candidatus Carsonella ruddii strain BT chromosome... | (110111) | AGGATTAATTAATAAATCAATAAATTTTTTAGAATGGTTAGAACTATAATTAAAAACAATTTTTTTTAAATGAT      |        |        |        |        |        |               |
| Candidatus Carsonella 135557 - 167442nt              | (1)      | -----                                                                           |        |        |        |        |        |               |
| SARS-CoV-2 Reference Genome NC_045512.2              | (1)      | -----                                                                           |        |        |        |        |        |               |
|                                                      |          | Section 1432                                                                    |        |        |        |        |        |               |
|                                                      | (110188) | 110188                                                                          | 110198 | 110209 | 110220 | 110231 | 110242 | 110253 110264 |
| Candidatus Carsonella ruddii strain BT chromosome... | (110188) | TTTATTTTTAGATAATTTTGATAGTTTTTCAAATAATATAATAAAAAAAAAATAATTTTAAAAAAAAATAAAATTAATT |        |        |        |        |        |               |
| Candidatus Carsonella 135557 - 167442nt              | (1)      | -----                                                                           |        |        |        |        |        |               |
| SARS-CoV-2 Reference Genome NC_045512.2              | (1)      | -----                                                                           |        |        |        |        |        |               |
|                                                      |          | Section 1433                                                                    |        |        |        |        |        |               |
|                                                      | (110265) | 110265                                                                          | 110275 | 110286 | 110297 | 110308 | 110319 | 110330 110341 |
| Candidatus Carsonella ruddii strain BT chromosome... | (110265) | GTTTTACTTTAAATATAAAAAAAAAATTATATAAATTTAATAATTGAAAAATAATAATTTTAGGCCCCAGGTCCAAAC  |        |        |        |        |        |               |
| Candidatus Carsonella 135557 - 167442nt              | (1)      | -----                                                                           |        |        |        |        |        |               |
| SARS-CoV-2 Reference Genome NC_045512.2              | (1)      | -----                                                                           |        |        |        |        |        |               |
|                                                      |          | Section 1434                                                                    |        |        |        |        |        |               |
|                                                      | (110342) | 110342                                                                          | 110352 | 110363 | 110374 | 110385 | 110396 | 110407 110418 |
| Candidatus Carsonella ruddii strain BT chromosome... | (110342) | AATATAATTAATAGTAATTTAAATACTATTGTTTTAGATAAATTTATAGGTAAAAAAATTAATAGGAATATGTTT     |        |        |        |        |        |               |
| Candidatus Carsonella 135557 - 167442nt              | (1)      | -----                                                                           |        |        |        |        |        |               |
| SARS-CoV-2 Reference Genome NC_045512.2              | (1)      | -----                                                                           |        |        |        |        |        |               |

## SARS-CoV-2 &amp; Bakterien.apr

|                                                      |          |                                                                                |        |        |        |        |        |               |
|------------------------------------------------------|----------|--------------------------------------------------------------------------------|--------|--------|--------|--------|--------|---------------|
|                                                      |          | Section 1435                                                                   |        |        |        |        |        |               |
|                                                      | (110419) | 110419                                                                         | 110429 | 110440 | 110451 | 110462 | 110473 | 110484 110495 |
| Candidatus Carsonella ruddii strain BT chromosome... | (110419) | GGGCCATCAAATAATATCTTGTTATTTAAATTATAAAATTTTAAATTAAATAATGTTTTTCACGGTCAACTTAAAA   |        |        |        |        |        |               |
| Candidatus Carsonella 135557 - 167442nt              | (1)      | -----                                                                          |        |        |        |        |        |               |
| SARS-CoV-2 Reference Genome NC_045512.2              | (1)      | -----                                                                          |        |        |        |        |        |               |
|                                                      |          | Section 1436                                                                   |        |        |        |        |        |               |
|                                                      | (110496) | 110496                                                                         | 110506 | 110517 | 110528 | 110539 | 110550 | 110561 110572 |
| Candidatus Carsonella ruddii strain BT chromosome... | (110496) | AAATTATTATTTTTTTAAACAAATATAAAATTTTATAATTAAAAAATAATTTTTTATAATTCTTTATCATGTATA    |        |        |        |        |        |               |
| Candidatus Carsonella 135557 - 167442nt              | (1)      | -----                                                                          |        |        |        |        |        |               |
| SARS-CoV-2 Reference Genome NC_045512.2              | (1)      | -----                                                                          |        |        |        |        |        |               |
|                                                      |          | Section 1437                                                                   |        |        |        |        |        |               |
|                                                      | (110573) | 110573                                                                         | 110583 | 110594 | 110605 | 110616 | 110627 | 110638 110649 |
| Candidatus Carsonella ruddii strain BT chromosome... | (110573) | GGTTATTATAGAACAATATTATTAGTAAAAATAGATTAGAATTATATATATTAAACAATAATAATTTAAATATGAA   |        |        |        |        |        |               |
| Candidatus Carsonella 135557 - 167442nt              | (1)      | -----                                                                          |        |        |        |        |        |               |
| SARS-CoV-2 Reference Genome NC_045512.2              | (1)      | -----                                                                          |        |        |        |        |        |               |
|                                                      |          | Section 1438                                                                   |        |        |        |        |        |               |
|                                                      | (110650) | 110650                                                                         | 110660 | 110671 | 110682 | 110693 | 110704 | 110715 110726 |
| Candidatus Carsonella ruddii strain BT chromosome... | (110650) | AAGTTTTCAATTTTCATTCAGAATCTATTTTATCAAATAAAAAATTTTTTTATATGATTAAAAATAAATTAAAAAAAT |        |        |        |        |        |               |
| Candidatus Carsonella 135557 - 167442nt              | (1)      | -----                                                                          |        |        |        |        |        |               |
| SARS-CoV-2 Reference Genome NC_045512.2              | (1)      | -----                                                                          |        |        |        |        |        |               |
|                                                      |          | Section 1439                                                                   |        |        |        |        |        |               |
|                                                      | (110727) | 110727                                                                         | 110737 | 110748 | 110759 | 110770 | 110781 | 110792 110803 |
| Candidatus Carsonella ruddii strain BT chromosome... | (110727) | TATATCTAATAATATTTTTATTAATAATAAATATTTATTTAAATTATTTTTTGTAACAAAAACATTTTTCTAATC    |        |        |        |        |        |               |
| Candidatus Carsonella 135557 - 167442nt              | (1)      | -----                                                                          |        |        |        |        |        |               |
| SARS-CoV-2 Reference Genome NC_045512.2              | (1)      | -----                                                                          |        |        |        |        |        |               |
|                                                      |          | Section 1440                                                                   |        |        |        |        |        |               |
|                                                      | (110804) | 110804                                                                         | 110814 | 110825 | 110836 | 110847 | 110858 | 110869 110880 |
| Candidatus Carsonella ruddii strain BT chromosome... | (110804) | AAAAAAATTTTTTTTATAAAATTTTAATAAATTTAGAAATTATTAAAAAAATTTATTAATTAAAAAAATATTTT     |        |        |        |        |        |               |
| Candidatus Carsonella 135557 - 167442nt              | (1)      | -----                                                                          |        |        |        |        |        |               |
| SARS-CoV-2 Reference Genome NC_045512.2              | (1)      | -----                                                                          |        |        |        |        |        |               |



## SARS-CoV-2 &amp; Bakterien.apr

|                                                      |          |                                                                                 |        |        |        |        |        |               |
|------------------------------------------------------|----------|---------------------------------------------------------------------------------|--------|--------|--------|--------|--------|---------------|
|                                                      |          | Section 1441                                                                    |        |        |        |        |        |               |
|                                                      | (110881) | 110881                                                                          | 110891 | 110902 | 110913 | 110924 | 110935 | 110946 110957 |
| Candidatus Carsonella ruddii strain BT chromosome... | (110881) | AATAATTTAAACATTTGTGGAAGTGGTGGTGATAATAATAATTTTACCAAATATATCAACTTCAGATTGTTTAATTTT  |        |        |        |        |        |               |
| Candidatus Carsonella 135557 - 167442nt              | (1)      | -----                                                                           |        |        |        |        |        |               |
| SARS-CoV-2 Reference Genome NC_045512.2              | (1)      | -----                                                                           |        |        |        |        |        |               |
|                                                      |          | Section 1442                                                                    |        |        |        |        |        |               |
|                                                      | (110958) | 110958                                                                          | 110968 | 110979 | 110990 | 111001 | 111012 | 111023 111034 |
| Candidatus Carsonella ruddii strain BT chromosome... | (110958) | TTATTTTTTAAAAAAAATTTAATTAAAAATTCCTGGAAATTCATTTTTATTAAAAAATGGAAGTATAGATTACTTAA   |        |        |        |        |        |               |
| Candidatus Carsonella 135557 - 167442nt              | (1)      | -----                                                                           |        |        |        |        |        |               |
| SARS-CoV-2 Reference Genome NC_045512.2              | (1)      | -----                                                                           |        |        |        |        |        |               |
|                                                      |          | Section 1443                                                                    |        |        |        |        |        |               |
|                                                      | (111035) | 111035                                                                          | 111045 | 111056 | 111067 | 111078 | 111089 | 111100 111111 |
| Candidatus Carsonella ruddii strain BT chromosome... | (111035) | ATAAATTTAAATTTTTTAAATAATTATATTTTAAAAAAAAAAAAACAAATATTTTTTTATATATTAAAAATTTTACAAT |        |        |        |        |        |               |
| Candidatus Carsonella 135557 - 167442nt              | (1)      | -----                                                                           |        |        |        |        |        |               |
| SARS-CoV-2 Reference Genome NC_045512.2              | (1)      | -----                                                                           |        |        |        |        |        |               |
|                                                      |          | Section 1444                                                                    |        |        |        |        |        |               |
|                                                      | (111112) | 111112                                                                          | 111122 | 111133 | 111144 | 111155 | 111166 | 111177 111188 |
| Candidatus Carsonella ruddii strain BT chromosome... | (111112) | TATAATTTTAATTTTAGAAAAAAATTAAATTAAATAATATTTTAAATATACTTAATTCTATATTAAATATTTTATT    |        |        |        |        |        |               |
| Candidatus Carsonella 135557 - 167442nt              | (1)      | -----                                                                           |        |        |        |        |        |               |
| SARS-CoV-2 Reference Genome NC_045512.2              | (1)      | -----                                                                           |        |        |        |        |        |               |
|                                                      |          | Section 1445                                                                    |        |        |        |        |        |               |
|                                                      | (111189) | 111189                                                                          | 111199 | 111210 | 111221 | 111232 | 111243 | 111254 111265 |
| Candidatus Carsonella ruddii strain BT chromosome... | (111189) | AAATATTAAAAATATAATAGGAATTTATTCAATAAAAAATAATTTTTTTATATAAATTTTAAATATTAATAATTTAA   |        |        |        |        |        |               |
| Candidatus Carsonella 135557 - 167442nt              | (1)      | -----                                                                           |        |        |        |        |        |               |
| SARS-CoV-2 Reference Genome NC_045512.2              | (1)      | -----                                                                           |        |        |        |        |        |               |
|                                                      |          | Section 1446                                                                    |        |        |        |        |        |               |
|                                                      | (111266) | 111266                                                                          | 111276 | 111287 | 111298 | 111309 | 111320 | 111331 111342 |
| Candidatus Carsonella ruddii strain BT chromosome... | (111266) | TAATTTTTTAATAATAAAAAGTGATGATATTATTCAAAATAAAGAAATTTTTTTTTTGAAAAAAAATATTTTTTTTA   |        |        |        |        |        |               |
| Candidatus Carsonella 135557 - 167442nt              | (1)      | -----                                                                           |        |        |        |        |        |               |
| SARS-CoV-2 Reference Genome NC_045512.2              | (1)      | -----                                                                           |        |        |        |        |        |               |

|                                                      |          |                                                                                 |        |        |        |        |        |               |
|------------------------------------------------------|----------|---------------------------------------------------------------------------------|--------|--------|--------|--------|--------|---------------|
|                                                      |          | Section 1447                                                                    |        |        |        |        |        |               |
| Candidatus Carsonella ruddii strain BT chromosome... | (111343) | 111343                                                                          | 111353 | 111364 | 111375 | 111386 | 111397 | 111408 111419 |
| Candidatus Carsonella 135557 - 167442nt              | (1)      | AATAATAATCAATATAATTTACATAATTTTTTTTTTAAATAAAAAATTTTTTTTGAATAATTTAAATTTCAATTATT   |        |        |        |        |        |               |
| SARS-CoV-2 Reference Genome NC_045512.2              | (1)      | -----                                                                           |        |        |        |        |        |               |
|                                                      |          | Section 1448                                                                    |        |        |        |        |        |               |
| Candidatus Carsonella ruddii strain BT chromosome... | (111420) | 111420                                                                          | 111430 | 111441 | 111452 | 111463 | 111474 | 111485 111496 |
| Candidatus Carsonella 135557 - 167442nt              | (1)      | TAATATAAAATTAAAAATAATTTTTTTATTTATAGTAAAAATAATATTATTAATAATTTTTTTATTTATTAACAAAA   |        |        |        |        |        |               |
| SARS-CoV-2 Reference Genome NC_045512.2              | (1)      | -----                                                                           |        |        |        |        |        |               |
|                                                      |          | Section 1449                                                                    |        |        |        |        |        |               |
| Candidatus Carsonella ruddii strain BT chromosome... | (111497) | 111497                                                                          | 111507 | 111518 | 111529 | 111540 | 111551 | 111562 111573 |
| Candidatus Carsonella 135557 - 167442nt              | (1)      | AAAAACCATTTTTTTTATTTTTATTTATTAATAAAATAATTACTTTTACATTTTTTTAAAAAAAATAATTAAAAAAAAT |        |        |        |        |        |               |
| SARS-CoV-2 Reference Genome NC_045512.2              | (1)      | -----                                                                           |        |        |        |        |        |               |
|                                                      |          | Section 1450                                                                    |        |        |        |        |        |               |
| Candidatus Carsonella ruddii strain BT chromosome... | (111574) | 111574                                                                          | 111584 | 111595 | 111606 | 111617 | 111628 | 111639 111650 |
| Candidatus Carsonella 135557 - 167442nt              | (1)      | AATGAATAAAATTTTATTTAACAAAAAAAATATAAATTTTTTTATAATTTTATTATAAATAATTTTAATATTAAAA    |        |        |        |        |        |               |
| SARS-CoV-2 Reference Genome NC_045512.2              | (1)      | -----                                                                           |        |        |        |        |        |               |
|                                                      |          | Section 1451                                                                    |        |        |        |        |        |               |
| Candidatus Carsonella ruddii strain BT chromosome... | (111651) | 111651                                                                          | 111661 | 111672 | 111683 | 111694 | 111705 | 111716 111727 |
| Candidatus Carsonella 135557 - 167442nt              | (1)      | AAAATATTTTTTAAAAAGAAATTTTAAAAAATTTAAAAAAAACAACATTTCTTTTATTTAGAAATATAAAAAACAA    |        |        |        |        |        |               |
| SARS-CoV-2 Reference Genome NC_045512.2              | (1)      | -----                                                                           |        |        |        |        |        |               |
|                                                      |          | Section 1452                                                                    |        |        |        |        |        |               |
| Candidatus Carsonella ruddii strain BT chromosome... | (111728) | 111728                                                                          | 111738 | 111749 | 111760 | 111771 | 111782 | 111793 111804 |
| Candidatus Carsonella 135557 - 167442nt              | (1)      | TCTCCATATAAAGGTTTATATAAAAAAATATTTTAAACAAATTAATAAATATGAAATTTTAGGTTGTATATGTTT     |        |        |        |        |        |               |
| SARS-CoV-2 Reference Genome NC_045512.2              | (1)      | -----                                                                           |        |        |        |        |        |               |

|                                                      |          |                                                                                  |        |        |        |        |        |               |
|------------------------------------------------------|----------|----------------------------------------------------------------------------------|--------|--------|--------|--------|--------|---------------|
|                                                      |          | Section 1453                                                                     |        |        |        |        |        |               |
| Candidatus Carsonella ruddii strain BT chromosome... | (111805) | 111805                                                                           | 111815 | 111826 | 111837 | 111848 | 111859 | 111870 111881 |
| Candidatus Carsonella 135557 - 167442nt              | (111805) | ATCAATATTAAACGAATGTGTTTCATTTTAAATGTAATTATATTGATTTTTTATTATATAAAAAAAAAATACCAATCTTT |        |        |        |        |        |               |
| SARS-CoV-2 Reference Genome NC_045512.2              | (1)      | -----                                                                            |        |        |        |        |        |               |
|                                                      |          | Section 1454                                                                     |        |        |        |        |        |               |
| Candidatus Carsonella ruddii strain BT chromosome... | (111882) | 111882                                                                           | 111892 | 111903 | 111914 | 111925 | 111936 | 111947 111958 |
| Candidatus Carsonella 135557 - 167442nt              | (111882) | GTATTCTTAAAAAGATTTTATTTTAAATGAATTTCAAGTAATTCATTCTTATATACTAGGTTATAATATAATTTTG     |        |        |        |        |        |               |
| SARS-CoV-2 Reference Genome NC_045512.2              | (1)      | -----                                                                            |        |        |        |        |        |               |
|                                                      |          | Section 1455                                                                     |        |        |        |        |        |               |
| Candidatus Carsonella ruddii strain BT chromosome... | (111959) | 111959                                                                           | 111969 | 111980 | 111991 | 112002 | 112013 | 112024 112035 |
| Candidatus Carsonella 135557 - 167442nt              | (111959) | TTATTATCTAGTATTAAATTACACATATTACAAAAATATATTTTATTTGTAAAAAATTAAAAATTTTATTATTTT      |        |        |        |        |        |               |
| SARS-CoV-2 Reference Genome NC_045512.2              | (1)      | -----                                                                            |        |        |        |        |        |               |
|                                                      |          | Section 1456                                                                     |        |        |        |        |        |               |
| Candidatus Carsonella ruddii strain BT chromosome... | (112036) | 112036                                                                           | 112046 | 112057 | 112068 | 112079 | 112090 | 112101 112112 |
| Candidatus Carsonella 135557 - 167442nt              | (112036) | AGAAATTAATAATTTAAAGAAATAAAAAAATAAAAAATATAAAACCATTATTTTATAGGAATAAATTGTAGAAATT     |        |        |        |        |        |               |
| SARS-CoV-2 Reference Genome NC_045512.2              | (1)      | -----                                                                            |        |        |        |        |        |               |
|                                                      |          | Section 1457                                                                     |        |        |        |        |        |               |
| Candidatus Carsonella ruddii strain BT chromosome... | (112113) | 112113                                                                           | 112123 | 112134 | 112145 | 112156 | 112167 | 112178 112189 |
| Candidatus Carsonella 135557 - 167442nt              | (112113) | TAAAAAATTTAATAATAAACAAAAAAAAAATAAATTATTAATTAAAAAATACCAAAAAATTGTTTTATAATTGCA      |        |        |        |        |        |               |
| SARS-CoV-2 Reference Genome NC_045512.2              | (1)      | -----                                                                            |        |        |        |        |        |               |
|                                                      |          | Section 1458                                                                     |        |        |        |        |        |               |
| Candidatus Carsonella ruddii strain BT chromosome... | (112190) | 112190                                                                           | 112200 | 112211 | 112222 | 112233 | 112244 | 112255 112266 |
| Candidatus Carsonella 135557 - 167442nt              | (112190) | GAATCAGGTATTGTAGATTATAATGAATTATTTTTTTTTATTGATAACAATATTAGAATATTTTAAATAGGTGATTA    |        |        |        |        |        |               |
| SARS-CoV-2 Reference Genome NC_045512.2              | (1)      | -----                                                                            |        |        |        |        |        |               |

|                                                      |          |                                                                                |                        |                        |                        |                        |                        |                                               |
|------------------------------------------------------|----------|--------------------------------------------------------------------------------|------------------------|------------------------|------------------------|------------------------|------------------------|-----------------------------------------------|
|                                                      |          | Section 1459                                                                   |                        |                        |                        |                        |                        |                                               |
|                                                      | (112267) | <a href="#">112267</a>                                                         | <a href="#">112277</a> | <a href="#">112288</a> | <a href="#">112299</a> | <a href="#">112310</a> | <a href="#">112321</a> | <a href="#">112332</a> <a href="#">112343</a> |
| Candidatus Carsonella ruddii strain BT chromosome... | (112267) | TTTTTTAAATAAAATAAATTGTTTTAAATATTATTTTAAATTATTAAATTAATTTTCCTTGGTAGCTCAGTTGGTAGA |                        |                        |                        |                        |                        |                                               |
| Candidatus Carsonella 135557 - 167442nt              | (1)      | -----                                                                          |                        |                        |                        |                        |                        |                                               |
| SARS-CoV-2 Reference Genome NC_045512.2              | (1)      | -----                                                                          |                        |                        |                        |                        |                        |                                               |
|                                                      |          | Section 1460                                                                   |                        |                        |                        |                        |                        |                                               |
|                                                      | (112344) | <a href="#">112344</a>                                                         | <a href="#">112354</a> | <a href="#">112365</a> | <a href="#">112376</a> | <a href="#">112387</a> | <a href="#">112398</a> | <a href="#">112409</a> <a href="#">112420</a> |
| Candidatus Carsonella ruddii strain BT chromosome... | (112344) | GCAAGTGACTGTTAATCATTGGTTCACAGGTTCAAGTCCTGTCTAAGGAGTAGTTATATCCTGATTCTGAACAGGAGA |                        |                        |                        |                        |                        |                                               |
| Candidatus Carsonella 135557 - 167442nt              | (1)      | -----                                                                          |                        |                        |                        |                        |                        |                                               |
| SARS-CoV-2 Reference Genome NC_045512.2              | (1)      | -----                                                                          |                        |                        |                        |                        |                        |                                               |
|                                                      |          | Section 1461                                                                   |                        |                        |                        |                        |                        |                                               |
|                                                      | (112421) | <a href="#">112421</a>                                                         | <a href="#">112431</a> | <a href="#">112442</a> | <a href="#">112453</a> | <a href="#">112464</a> | <a href="#">112475</a> | <a href="#">112486</a> <a href="#">112497</a> |
| Candidatus Carsonella ruddii strain BT chromosome... | (112421) | CCTAATCATCATGAATGATTTGCTCTACCAACTAAGCTATATAACCAACAAAAATATACAAATTTTATAAAAAAATG  |                        |                        |                        |                        |                        |                                               |
| Candidatus Carsonella 135557 - 167442nt              | (1)      | -----                                                                          |                        |                        |                        |                        |                        |                                               |
| SARS-CoV-2 Reference Genome NC_045512.2              | (1)      | -----                                                                          |                        |                        |                        |                        |                        |                                               |
|                                                      |          | Section 1462                                                                   |                        |                        |                        |                        |                        |                                               |
|                                                      | (112498) | <a href="#">112498</a>                                                         | <a href="#">112508</a> | <a href="#">112519</a> | <a href="#">112530</a> | <a href="#">112541</a> | <a href="#">112552</a> | <a href="#">112563</a> <a href="#">112574</a> |
| Candidatus Carsonella ruddii strain BT chromosome... | (112498) | TCAAATTTTGTAAAAAATAATTTATTTTTTTTTTTTTAAAAAAGAAAAAAGAAAAATTTTTTTCAGAATAAAATT    |                        |                        |                        |                        |                        |                                               |
| Candidatus Carsonella 135557 - 167442nt              | (1)      | -----                                                                          |                        |                        |                        |                        |                        |                                               |
| SARS-CoV-2 Reference Genome NC_045512.2              | (1)      | -----                                                                          |                        |                        |                        |                        |                        |                                               |
|                                                      |          | Section 1463                                                                   |                        |                        |                        |                        |                        |                                               |
|                                                      | (112575) | <a href="#">112575</a>                                                         | <a href="#">112585</a> | <a href="#">112596</a> | <a href="#">112607</a> | <a href="#">112618</a> | <a href="#">112629</a> | <a href="#">112640</a> <a href="#">112651</a> |
| Candidatus Carsonella ruddii strain BT chromosome... | (112575) | TTTTTTTAAAAATAATATTTAAATTTATTGATCTAGGATAAAAAATTGTTATTAATAAAATTTATTGTTTTTATATTC |                        |                        |                        |                        |                        |                                               |
| Candidatus Carsonella 135557 - 167442nt              | (1)      | -----                                                                          |                        |                        |                        |                        |                        |                                               |
| SARS-CoV-2 Reference Genome NC_045512.2              | (1)      | -----                                                                          |                        |                        |                        |                        |                        |                                               |
|                                                      |          | Section 1464                                                                   |                        |                        |                        |                        |                        |                                               |
|                                                      | (112652) | <a href="#">112652</a>                                                         | <a href="#">112662</a> | <a href="#">112673</a> | <a href="#">112684</a> | <a href="#">112695</a> | <a href="#">112706</a> | <a href="#">112717</a> <a href="#">112728</a> |
| Candidatus Carsonella ruddii strain BT chromosome... | (112652) | TTTATATTATTGTTTTTATAATAAATTTTAAATTTTTTTTTTAAACGTTTCTAATATAAAATATTTAATTTTATTATT |                        |                        |                        |                        |                        |                                               |
| Candidatus Carsonella 135557 - 167442nt              | (1)      | -----                                                                          |                        |                        |                        |                        |                        |                                               |
| SARS-CoV-2 Reference Genome NC_045512.2              | (1)      | -----                                                                          |                        |                        |                        |                        |                        |                                               |

## SARS-CoV-2 &amp; Bakterien.apr

|                                                      |          |                                                                                 |        |        |        |        |        |               |
|------------------------------------------------------|----------|---------------------------------------------------------------------------------|--------|--------|--------|--------|--------|---------------|
|                                                      |          | Section 1465                                                                    |        |        |        |        |        |               |
|                                                      | (112729) | 112729                                                                          | 112739 | 112750 | 112761 | 112772 | 112783 | 112794 112805 |
| Candidatus Carsonella ruddii strain BT chromosome... | (112729) | TATAGTAGAATATACTACTTTTTTAATAAAAGTAAAAATAAATTTTATTTAACAAAACAACAATTAAAAAATTATTTT  |        |        |        |        |        |               |
| Candidatus Carsonella 135557 - 167442nt              | (1)      | -----                                                                           |        |        |        |        |        |               |
| SARS-CoV-2 Reference Genome NC_045512.2              | (1)      | -----                                                                           |        |        |        |        |        |               |
|                                                      |          | Section 1466                                                                    |        |        |        |        |        |               |
|                                                      | (112806) | 112806                                                                          | 112816 | 112827 | 112838 | 112849 | 112860 | 112871 112882 |
| Candidatus Carsonella ruddii strain BT chromosome... | (112806) | TTAATATTTTTTTTTAAATAGTTATTATTAAATGTATAAATATTAATAATTTTATTATTATTATATAAAATCTCCAAGA |        |        |        |        |        |               |
| Candidatus Carsonella 135557 - 167442nt              | (1)      | -----                                                                           |        |        |        |        |        |               |
| SARS-CoV-2 Reference Genome NC_045512.2              | (1)      | -----                                                                           |        |        |        |        |        |               |
|                                                      |          | Section 1467                                                                    |        |        |        |        |        |               |
|                                                      | (112883) | 112883                                                                          | 112893 | 112904 | 112915 | 112926 | 112937 | 112948 112959 |
| Candidatus Carsonella ruddii strain BT chromosome... | (112883) | ATAATTTTATTATTATTTTTTTATTTTATTAAAAATTTTAATTTTATATTTAAATTTTCATATTTTTCTAATATAATTT |        |        |        |        |        |               |
| Candidatus Carsonella 135557 - 167442nt              | (1)      | -----                                                                           |        |        |        |        |        |               |
| SARS-CoV-2 Reference Genome NC_045512.2              | (1)      | -----                                                                           |        |        |        |        |        |               |
|                                                      |          | Section 1468                                                                    |        |        |        |        |        |               |
|                                                      | (112960) | 112960                                                                          | 112970 | 112981 | 112992 | 113003 | 113014 | 113025 113036 |
| Candidatus Carsonella ruddii strain BT chromosome... | (112960) | TTTTAATTTCTTCTATAAATAAATATTTAGTAGTTATAATTTTAATTTTATCATTAAAAATAATTAAAAATTAATAGTG |        |        |        |        |        |               |
| Candidatus Carsonella 135557 - 167442nt              | (1)      | -----                                                                           |        |        |        |        |        |               |
| SARS-CoV-2 Reference Genome NC_045512.2              | (1)      | -----                                                                           |        |        |        |        |        |               |
|                                                      |          | Section 1469                                                                    |        |        |        |        |        |               |
|                                                      | (113037) | 113037                                                                          | 113047 | 113058 | 113069 | 113080 | 113091 | 113102 113113 |
| Candidatus Carsonella ruddii strain BT chromosome... | (113037) | TCTGTTACTATTAATTTATTTATTTTAGAATTATAAATTTTATAAAAAGATTTTTCAGAAAAATAGAATGAGTAAT    |        |        |        |        |        |               |
| Candidatus Carsonella 135557 - 167442nt              | (1)      | -----                                                                           |        |        |        |        |        |               |
| SARS-CoV-2 Reference Genome NC_045512.2              | (1)      | -----                                                                           |        |        |        |        |        |               |
|                                                      |          | Section 1470                                                                    |        |        |        |        |        |               |
|                                                      | (113114) | 113114                                                                          | 113124 | 113135 | 113146 | 113157 | 113168 | 113179 113190 |
| Candidatus Carsonella ruddii strain BT chromosome... | (113114) | ATAAACAATTACAGTATTTATTTTATTAAAAAATAAAAAATTAGTAACTTCTATTATAGAATTTCCAGTATCAATAA   |        |        |        |        |        |               |
| Candidatus Carsonella 135557 - 167442nt              | (1)      | -----                                                                           |        |        |        |        |        |               |
| SARS-CoV-2 Reference Genome NC_045512.2              | (1)      | -----                                                                           |        |        |        |        |        |               |

|                                                      |          |                                                                                 |        |        |        |        |        |               |
|------------------------------------------------------|----------|---------------------------------------------------------------------------------|--------|--------|--------|--------|--------|---------------|
|                                                      |          | Section 1471                                                                    |        |        |        |        |        |               |
|                                                      | (113191) | 113191                                                                          | 113201 | 113212 | 113223 | 113234 | 113245 | 113256 113267 |
| Candidatus Carsonella ruddii strain BT chromosome... | (113191) | TATCATCAACAACAATACATTTTTTAAATTCTACATTTCCAATAATACAAAAATTTTATATAATTTGAAATTGGT     |        |        |        |        |        |               |
| Candidatus Carsonella 135557 - 167442nt              | (1)      | -----                                                                           |        |        |        |        |        |               |
| SARS-CoV-2 Reference Genome NC_045512.2              | (1)      | -----                                                                           |        |        |        |        |        |               |
|                                                      |          | Section 1472                                                                    |        |        |        |        |        |               |
|                                                      | (113268) | 113268                                                                          | 113278 | 113289 | 113300 | 113311 | 113322 | 113333 113344 |
| Candidatus Carsonella ruddii strain BT chromosome... | (113268) | CTTCTTTTATCAATTATCACTAATTCTAAATTTAAATAATTTGCTAAATTTTCGCTCTTAAACTCCACCTATATC     |        |        |        |        |        |               |
| Candidatus Carsonella 135557 - 167442nt              | (1)      | -----                                                                           |        |        |        |        |        |               |
| SARS-CoV-2 Reference Genome NC_045512.2              | (1)      | -----                                                                           |        |        |        |        |        |               |
|                                                      |          | Section 1473                                                                    |        |        |        |        |        |               |
|                                                      | (113345) | 113345                                                                          | 113355 | 113366 | 113377 | 113388 | 113399 | 113410 113421 |
| Candidatus Carsonella ruddii strain BT chromosome... | (113345) | AGGTGAAACAATAATATCAAACTAATATTATTTTAAACAATATCATTAACAAATAAAGATGTAGATTTTAAATATTT   |        |        |        |        |        |               |
| Candidatus Carsonella 135557 - 167442nt              | (1)      | -----                                                                           |        |        |        |        |        |               |
| SARS-CoV-2 Reference Genome NC_045512.2              | (1)      | -----                                                                           |        |        |        |        |        |               |
|                                                      |          | Section 1474                                                                    |        |        |        |        |        |               |
|                                                      | (113422) | 113422                                                                          | 113432 | 113443 | 113454 | 113465 | 113476 | 113487 113498 |
| Candidatus Carsonella ruddii strain BT chromosome... | (113422) | TTAAAGGTGTATTAAACAACATTCAAATTACTAGAAATGTGGATCTAATGTAATAATTTTGTTTACATTAAAAAAA    |        |        |        |        |        |               |
| Candidatus Carsonella 135557 - 167442nt              | (1)      | -----                                                                           |        |        |        |        |        |               |
| SARS-CoV-2 Reference Genome NC_045512.2              | (1)      | -----                                                                           |        |        |        |        |        |               |
|                                                      |          | Section 1475                                                                    |        |        |        |        |        |               |
|                                                      | (113499) | 113499                                                                          | 113509 | 113520 | 113531 | 113542 | 113553 | 113564 113575 |
| Candidatus Carsonella ruddii strain BT chromosome... | (113499) | TCAAATAAATTAGAAATTAATTTAATAGAAATAGAAGATTTTCGTTAAATATTTTGTCTTGCCCTAGAATAACAAAA   |        |        |        |        |        |               |
| Candidatus Carsonella 135557 - 167442nt              | (1)      | -----                                                                           |        |        |        |        |        |               |
| SARS-CoV-2 Reference Genome NC_045512.2              | (1)      | -----                                                                           |        |        |        |        |        |               |
|                                                      |          | Section 1476                                                                    |        |        |        |        |        |               |
|                                                      | (113576) | 113576                                                                          | 113586 | 113597 | 113608 | 113619 | 113630 | 113641 113652 |
| Candidatus Carsonella ruddii strain BT chromosome... | (113576) | ATAAGGTATTATTAAATATATTTTTTTTAAATACATATTTTTTTTAAAGAATCAATTATTAAAAATAAATTTATTAAAT |        |        |        |        |        |               |
| Candidatus Carsonella 135557 - 167442nt              | (1)      | -----                                                                           |        |        |        |        |        |               |
| SARS-CoV-2 Reference Genome NC_045512.2              | (1)      | -----                                                                           |        |        |        |        |        |               |

## SARS-CoV-2 &amp; Bakterien.apr

|                                                      |          |                                                                                   |        |        |        |        |        |               |
|------------------------------------------------------|----------|-----------------------------------------------------------------------------------|--------|--------|--------|--------|--------|---------------|
|                                                      |          | Section 1477                                                                      |        |        |        |        |        |               |
|                                                      | (113653) | 113653                                                                            | 113663 | 113674 | 113685 | 113696 | 113707 | 113718 113729 |
| Candidatus Carsonella ruddii strain BT chromosome... | (113653) | TATCATGAATAGGATTAGATAAACTTTGTAAATAAAAAATAATTTTTTCATTAAATTTTTTTAAAAATTGAATTTTA     |        |        |        |        |        |               |
| Candidatus Carsonella 135557 - 167442nt              | (1)      | -----                                                                             |        |        |        |        |        |               |
| SARS-CoV-2 Reference Genome NC_045512.2              | (1)      | -----                                                                             |        |        |        |        |        |               |
|                                                      |          | Section 1478                                                                      |        |        |        |        |        |               |
|                                                      | (113730) | 113730                                                                            | 113740 | 113751 | 113762 | 113773 | 113784 | 113795 113806 |
| Candidatus Carsonella ruddii strain BT chromosome... | (113730) | TATTCATTATCTTTAAATTTTTCAATTTTAATATAATTTATTTTATATTAATAATTTTAGCAAACCTTTTAAAAA       |        |        |        |        |        |               |
| Candidatus Carsonella 135557 - 167442nt              | (1)      | -----                                                                             |        |        |        |        |        |               |
| SARS-CoV-2 Reference Genome NC_045512.2              | (1)      | -----                                                                             |        |        |        |        |        |               |
|                                                      |          | Section 1479                                                                      |        |        |        |        |        |               |
|                                                      | (113807) | 113807                                                                            | 113817 | 113828 | 113839 | 113850 | 113861 | 113872 113883 |
| Candidatus Carsonella ruddii strain BT chromosome... | (113807) | ATTTAAGTTTGAATCTCCAAATATAATATTTGGTTTTGAAATTTTCATATGAAAAATAATTTAATTTTAGAAATTAG     |        |        |        |        |        |               |
| Candidatus Carsonella 135557 - 167442nt              | (1)      | -----                                                                             |        |        |        |        |        |               |
| SARS-CoV-2 Reference Genome NC_045512.2              | (1)      | -----                                                                             |        |        |        |        |        |               |
|                                                      |          | Section 1480                                                                      |        |        |        |        |        |               |
|                                                      | (113884) | 113884                                                                            | 113894 | 113905 | 113916 | 113927 | 113938 | 113949 113960 |
| Candidatus Carsonella ruddii strain BT chromosome... | (113884) | ACAAGGAATAGGAGGAGATGAATCCATCCTTTTTTTAAAAGATTTAAATAAAATGTATATTAAATTTTTTCAAAAAA     |        |        |        |        |        |               |
| Candidatus Carsonella 135557 - 167442nt              | (1)      | -----                                                                             |        |        |        |        |        |               |
| SARS-CoV-2 Reference Genome NC_045512.2              | (1)      | -----                                                                             |        |        |        |        |        |               |
|                                                      |          | Section 1481                                                                      |        |        |        |        |        |               |
|                                                      | (113961) | 113961                                                                            | 113971 | 113982 | 113993 | 114004 | 114015 | 114026 114037 |
| Candidatus Carsonella ruddii strain BT chromosome... | (113961) | AAAAAATTAAATTTAATATATTTTTTAAAAAATAATAAGAAATTTATTTATTAATAATAGAAAAATAATAATTATTCTAAT |        |        |        |        |        |               |
| Candidatus Carsonella 135557 - 167442nt              | (1)      | -----                                                                             |        |        |        |        |        |               |
| SARS-CoV-2 Reference Genome NC_045512.2              | (1)      | -----                                                                             |        |        |        |        |        |               |
|                                                      |          | Section 1482                                                                      |        |        |        |        |        |               |
|                                                      | (114038) | 114038                                                                            | 114048 | 114059 | 114070 | 114081 | 114092 | 114103 114114 |
| Candidatus Carsonella ruddii strain BT chromosome... | (114038) | TTTTTTTTTAAATGAATCTGGAATTCATAGAGTTCAAAGAATACCAAAAAATGAAACACAAGGTAAAATACATACATC    |        |        |        |        |        |               |
| Candidatus Carsonella 135557 - 167442nt              | (1)      | -----                                                                             |        |        |        |        |        |               |
| SARS-CoV-2 Reference Genome NC_045512.2              | (1)      | -----                                                                             |        |        |        |        |        |               |

|                                                      |          |                                                                                |        |        |        |        |        |               |
|------------------------------------------------------|----------|--------------------------------------------------------------------------------|--------|--------|--------|--------|--------|---------------|
|                                                      |          | Section 1483                                                                   |        |        |        |        |        |               |
|                                                      | (114115) | 114115                                                                         | 114125 | 114136 | 114147 | 114158 | 114169 | 114180 114191 |
| Candidatus Carsonella ruddii strain BT chromosome... | (114115) | CACTTGTAGTGTTTTGTTTCTAATGAAACAGATATAAAACATATTATTTTAGAAAATCAAGATTAAAAATAGAAA    |        |        |        |        |        |               |
| Candidatus Carsonella 135557 - 167442nt              | (1)      | -----                                                                          |        |        |        |        |        |               |
| SARS-CoV-2 Reference Genome NC_045512.2              | (1)      | -----                                                                          |        |        |        |        |        |               |
|                                                      |          | Section 1484                                                                   |        |        |        |        |        |               |
|                                                      | (114192) | 114192                                                                         | 114202 | 114213 | 114224 | 114235 | 114246 | 114257 114268 |
| Candidatus Carsonella ruddii strain BT chromosome... | (114192) | CTTGTAATCAAGTGGATCAGGTGGACAACATGTAAATACAACAAATTCTTCTATTAAAAATTACACATTTACCTACA  |        |        |        |        |        |               |
| Candidatus Carsonella 135557 - 167442nt              | (1)      | -----                                                                          |        |        |        |        |        |               |
| SARS-CoV-2 Reference Genome NC_045512.2              | (1)      | -----                                                                          |        |        |        |        |        |               |
|                                                      |          | Section 1485                                                                   |        |        |        |        |        |               |
|                                                      | (114269) | 114269                                                                         | 114279 | 114290 | 114301 | 114312 | 114323 | 114334 114345 |
| Candidatus Carsonella ruddii strain BT chromosome... | (114269) | AATATTTTATGTTGAATGTAGTGATGAACGTTCACAATTTTTAAATAAAAAATAAGCTTTAGAAATTTTAAATATAAA |        |        |        |        |        |               |
| Candidatus Carsonella 135557 - 167442nt              | (1)      | -----                                                                          |        |        |        |        |        |               |
| SARS-CoV-2 Reference Genome NC_045512.2              | (1)      | -----                                                                          |        |        |        |        |        |               |
|                                                      |          | Section 1486                                                                   |        |        |        |        |        |               |
|                                                      | (114346) | 114346                                                                         | 114356 | 114367 | 114378 | 114389 | 114400 | 114411 114422 |
| Candidatus Carsonella ruddii strain BT chromosome... | (114346) | ATTAAATAAATTAAAAAATGAAAAATTCAATAATGAATTAAATTTTATTAGAAAAAATATTATTTCTAAATCAGAAA  |        |        |        |        |        |               |
| Candidatus Carsonella 135557 - 167442nt              | (1)      | -----                                                                          |        |        |        |        |        |               |
| SARS-CoV-2 Reference Genome NC_045512.2              | (1)      | -----                                                                          |        |        |        |        |        |               |
|                                                      |          | Section 1487                                                                   |        |        |        |        |        |               |
|                                                      | (114423) | 114423                                                                         | 114433 | 114444 | 114455 | 114466 | 114477 | 114488 114499 |
| Candidatus Carsonella ruddii strain BT chromosome... | (114423) | GATCAAAAAAATAAGAACATATAATTTTCCAAATAATAAAATAATAGATCATGTTAAAAATAATTGTTATTTTCAA   |        |        |        |        |        |               |
| Candidatus Carsonella 135557 - 167442nt              | (1)      | -----                                                                          |        |        |        |        |        |               |
| SARS-CoV-2 Reference Genome NC_045512.2              | (1)      | -----                                                                          |        |        |        |        |        |               |
|                                                      |          | Section 1488                                                                   |        |        |        |        |        |               |
|                                                      | (114500) | 114500                                                                         | 114510 | 114521 | 114532 | 114543 | 114554 | 114565 114576 |
| Candidatus Carsonella ruddii strain BT chromosome... | (114500) | TTAAATAAAATTTTAAATGGTGATTTAGATATTATGTTTAAAAATTAAAAATAAACAAATTTTTTATTTTAAAAAAA  |        |        |        |        |        |               |
| Candidatus Carsonella 135557 - 167442nt              | (1)      | -----                                                                          |        |        |        |        |        |               |
| SARS-CoV-2 Reference Genome NC_045512.2              | (1)      | -----                                                                          |        |        |        |        |        |               |



|                                                      |          |                                                                               |        |        |        |        |        |               |
|------------------------------------------------------|----------|-------------------------------------------------------------------------------|--------|--------|--------|--------|--------|---------------|
|                                                      |          | Section 1489                                                                  |        |        |        |        |        |               |
|                                                      | (114577) | 114577                                                                        | 114587 | 114598 | 114609 | 114620 | 114631 | 114642 114653 |
| Candidatus Carsonella ruddii strain BT chromosome... | (114577) | ATTTTTTTAAATAAATTTAATTTTAAAAAGAAAAAAAAATTTTTTTTATTTTATATATAAAAAATAAATATATTATA |        |        |        |        |        |               |
| Candidatus Carsonella 135557 - 167442nt              | (1)      | -----                                                                         |        |        |        |        |        |               |
| SARS-CoV-2 Reference Genome NC_045512.2              | (1)      | -----                                                                         |        |        |        |        |        |               |
|                                                      |          | Section 1490                                                                  |        |        |        |        |        |               |
|                                                      | (114654) | 114654                                                                        | 114664 | 114675 | 114686 | 114697 | 114708 | 114719 114730 |
| Candidatus Carsonella ruddii strain BT chromosome... | (114654) | ATAAAAAAAAAAATTTATTTAAAAAATATTTATTTTATTAATAATGTTTATTATTAATTTTATATTTTTTTT      |        |        |        |        |        |               |
| Candidatus Carsonella 135557 - 167442nt              | (1)      | -----                                                                         |        |        |        |        |        |               |
| SARS-CoV-2 Reference Genome NC_045512.2              | (1)      | -----                                                                         |        |        |        |        |        |               |
|                                                      |          | Section 1491                                                                  |        |        |        |        |        |               |
|                                                      | (114731) | 114731                                                                        | 114741 | 114752 | 114763 | 114774 | 114785 | 114796 114807 |
| Candidatus Carsonella ruddii strain BT chromosome... | (114731) | TAGGAAATTTTTTAAAAAATAACCAATTTTTTTTTTTTTTAAAAATTATTTCAAATCAAATTTATAATATAACCA   |        |        |        |        |        |               |
| Candidatus Carsonella 135557 - 167442nt              | (1)      | -----                                                                         |        |        |        |        |        |               |
| SARS-CoV-2 Reference Genome NC_045512.2              | (1)      | -----                                                                         |        |        |        |        |        |               |
|                                                      |          | Section 1492                                                                  |        |        |        |        |        |               |
|                                                      | (114808) | 114808                                                                        | 114818 | 114829 | 114840 | 114851 | 114862 | 114873 114884 |
| Candidatus Carsonella ruddii strain BT chromosome... | (114808) | ATATCATAATCAATAAAATAATTATAATTTTTTGAAAAACATTTTTTCTTAATTTAGATGTATAATTAATATTAAA  |        |        |        |        |        |               |
| Candidatus Carsonella 135557 - 167442nt              | (1)      | -----                                                                         |        |        |        |        |        |               |
| SARS-CoV-2 Reference Genome NC_045512.2              | (1)      | -----                                                                         |        |        |        |        |        |               |
|                                                      |          | Section 1493                                                                  |        |        |        |        |        |               |
|                                                      | (114885) | 114885                                                                        | 114895 | 114906 | 114917 | 114928 | 114939 | 114950 114961 |
| Candidatus Carsonella ruddii strain BT chromosome... | (114885) | ATTTCTAGTTTGTGATAATAAATTATTTTTTTTTTCTAAATTTATTATTTTCTAAAAATTTTCATATTTTATAGATT |        |        |        |        |        |               |
| Candidatus Carsonella 135557 - 167442nt              | (1)      | -----                                                                         |        |        |        |        |        |               |
| SARS-CoV-2 Reference Genome NC_045512.2              | (1)      | -----                                                                         |        |        |        |        |        |               |
|                                                      |          | Section 1494                                                                  |        |        |        |        |        |               |
|                                                      | (114962) | 114962                                                                        | 114972 | 114983 | 114994 | 115005 | 115016 | 115027 115038 |
| Candidatus Carsonella ruddii strain BT chromosome... | (114962) | TCTTAATATTTTCATATGAATTTAAATTTTAAATTTCTGTTTTTTTACTTTTTTAAATTTAAATTTATTTAAACA   |        |        |        |        |        |               |
| Candidatus Carsonella 135557 - 167442nt              | (1)      | -----                                                                         |        |        |        |        |        |               |
| SARS-CoV-2 Reference Genome NC_045512.2              | (1)      | -----                                                                         |        |        |        |        |        |               |

|                                                      |          |                                                                                  |        |        |        |        |        |               |
|------------------------------------------------------|----------|----------------------------------------------------------------------------------|--------|--------|--------|--------|--------|---------------|
|                                                      |          | Section 1495                                                                     |        |        |        |        |        |               |
| Candidatus Carsonella ruddii strain BT chromosome... | (115039) | 115039                                                                           | 115049 | 115060 | 115071 | 115082 | 115093 | 115104 115115 |
| Candidatus Carsonella 135557 - 167442nt              | (115039) | GAAATATTTTAAATCAATACGCATTTCTCCTAAATGCATTTTAAATTAGAAATTTTATGTTTAAATAAATTTTTTTTT   |        |        |        |        |        |               |
| SARS-CoV-2 Reference Genome NC_045512.2              | (1)      | -----                                                                            |        |        |        |        |        |               |
|                                                      |          | Section 1496                                                                     |        |        |        |        |        |               |
| Candidatus Carsonella ruddii strain BT chromosome... | (115116) | 115116                                                                           | 115126 | 115137 | 115148 | 115159 | 115170 | 115181 115192 |
| Candidatus Carsonella 135557 - 167442nt              | (115116) | TATTTTTTTTTAAGAAAAATATAAACAAATTAAAAATTTGAAAAATTTGGTTCAGTAACTAATTCAAATAAACCATTTTC |        |        |        |        |        |               |
| SARS-CoV-2 Reference Genome NC_045512.2              | (1)      | -----                                                                            |        |        |        |        |        |               |
|                                                      |          | Section 1497                                                                     |        |        |        |        |        |               |
| Candidatus Carsonella ruddii strain BT chromosome... | (115193) | 115193                                                                           | 115203 | 115214 | 115225 | 115236 | 115247 | 115258 115269 |
| Candidatus Carsonella 135557 - 167442nt              | (115193) | CACTTCTTTTATAATTTATTTTTTAAAAAATTACTTTCTTTTTTAGAAGAAGCAGCATCTTCTTCTAAATGAATTTTT   |        |        |        |        |        |               |
| SARS-CoV-2 Reference Genome NC_045512.2              | (1)      | -----                                                                            |        |        |        |        |        |               |
|                                                      |          | Section 1498                                                                     |        |        |        |        |        |               |
| Candidatus Carsonella ruddii strain BT chromosome... | (115270) | 115270                                                                           | 115280 | 115291 | 115302 | 115313 | 115324 | 115335 115346 |
| Candidatus Carsonella 135557 - 167442nt              | (115270) | TTAATAACAATTTTTTTTTTTTACATTTATTATTAACTAAATTAATAAATGTTGAAAATTATTTTGAGTTAATTG      |        |        |        |        |        |               |
| SARS-CoV-2 Reference Genome NC_045512.2              | (1)      | -----                                                                            |        |        |        |        |        |               |
|                                                      |          | Section 1499                                                                     |        |        |        |        |        |               |
| Candidatus Carsonella ruddii strain BT chromosome... | (115347) | 115347                                                                           | 115357 | 115368 | 115379 | 115390 | 115401 | 115412 115423 |
| Candidatus Carsonella 135557 - 167442nt              | (115347) | ATAATTTTTTGATAAATCATAATAAAAAATAATTTTTCTTTCAATAATAGATAGTAAAAACAACGACTTATTAATA     |        |        |        |        |        |               |
| SARS-CoV-2 Reference Genome NC_045512.2              | (1)      | -----                                                                            |        |        |        |        |        |               |
|                                                      |          | Section 1500                                                                     |        |        |        |        |        |               |
| Candidatus Carsonella ruddii strain BT chromosome... | (115424) | 115424                                                                           | 115434 | 115445 | 115456 | 115467 | 115478 | 115489 115500 |
| Candidatus Carsonella 135557 - 167442nt              | (115424) | TTTTATTTATTAAAAATATTAAATTAATAATTTTAATGTTAAATATTGGTAATTTTCTGGATATGCAATATCATAT     |        |        |        |        |        |               |
| SARS-CoV-2 Reference Genome NC_045512.2              | (1)      | -----                                                                            |        |        |        |        |        |               |

## SARS-CoV-2 &amp; Bakterien.apr

|                                                      |          |                                                                                |        |        |        |        |        |               |
|------------------------------------------------------|----------|--------------------------------------------------------------------------------|--------|--------|--------|--------|--------|---------------|
|                                                      |          | Section 1501                                                                   |        |        |        |        |        |               |
|                                                      | (115501) | 115501                                                                         | 115511 | 115522 | 115533 | 115544 | 115555 | 115566 115577 |
| Candidatus Carsonella ruddii strain BT chromosome... | (115501) | AAATTAAATTATTATTAGAAAAATTTTATTATTAACTTATATGTATTTACAAACCTATAAATATTTTATA         |        |        |        |        |        |               |
| Candidatus Carsonella 135557 - 167442nt              | (1)      | -----                                                                          |        |        |        |        |        |               |
| SARS-CoV-2 Reference Genome NC_045512.2              | (1)      | -----                                                                          |        |        |        |        |        |               |
|                                                      |          | Section 1502                                                                   |        |        |        |        |        |               |
|                                                      | (115578) | 115578                                                                         | 115588 | 115599 | 115610 | 115621 | 115632 | 115643 115654 |
| Candidatus Carsonella ruddii strain BT chromosome... | (115578) | ATATTTTTTAATTAAAAACATAATTTTTTAAATTTAAAGATTTCGTATAAAATTGATAATTCTAATAAATCTAAATCA |        |        |        |        |        |               |
| Candidatus Carsonella 135557 - 167442nt              | (1)      | -----                                                                          |        |        |        |        |        |               |
| SARS-CoV-2 Reference Genome NC_045512.2              | (1)      | -----                                                                          |        |        |        |        |        |               |
|                                                      |          | Section 1503                                                                   |        |        |        |        |        |               |
|                                                      | (115655) | 115655                                                                         | 115665 | 115676 | 115687 | 115698 | 115709 | 115720 115731 |
| Candidatus Carsonella ruddii strain BT chromosome... | (115655) | TTATTTTTTATTACAAATTATTTGAAATCCTATAGGTGAATGATTAATAAATCCTATTCTTAAATTAATAGTAGGAAA |        |        |        |        |        |               |
| Candidatus Carsonella 135557 - 167442nt              | (1)      | -----                                                                          |        |        |        |        |        |               |
| SARS-CoV-2 Reference Genome NC_045512.2              | (1)      | -----                                                                          |        |        |        |        |        |               |
|                                                      |          | Section 1504                                                                   |        |        |        |        |        |               |
|                                                      | (115732) | 115732                                                                         | 115742 | 115753 | 115764 | 115775 | 115786 | 115797 115808 |
| Candidatus Carsonella ruddii strain BT chromosome... | (115732) | ACCTAAAATATTAGATATCATTGTAAATAAATCAACATATTCTGAATAAATATTATTTTTTTTTTCAAAAATATCTA  |        |        |        |        |        |               |
| Candidatus Carsonella 135557 - 167442nt              | (1)      | -----                                                                          |        |        |        |        |        |               |
| SARS-CoV-2 Reference Genome NC_045512.2              | (1)      | -----                                                                          |        |        |        |        |        |               |
|                                                      |          | Section 1505                                                                   |        |        |        |        |        |               |
|                                                      | (115809) | 115809                                                                         | 115819 | 115830 | 115841 | 115852 | 115863 | 115874 115885 |
| Candidatus Carsonella ruddii strain BT chromosome... | (115809) | AATTCGTTGGTAATAATATAAAATTTGATTTTCAAAACAATTTTGAAAAATTTTTCAATTTTTTAATTTCTAAA     |        |        |        |        |        |               |
| Candidatus Carsonella 135557 - 167442nt              | (1)      | -----                                                                          |        |        |        |        |        |               |
| SARS-CoV-2 Reference Genome NC_045512.2              | (1)      | -----                                                                          |        |        |        |        |        |               |
|                                                      |          | Section 1506                                                                   |        |        |        |        |        |               |
|                                                      | (115886) | 115886                                                                         | 115896 | 115907 | 115918 | 115929 | 115940 | 115951 115962 |
| Candidatus Carsonella ruddii strain BT chromosome... | (115886) | ATATTAAATTTTTTTTAAATATAAAAAAATTATTACCTTTAATAATTTTATTTTACAATCTTTAGAAAATATTCT    |        |        |        |        |        |               |
| Candidatus Carsonella 135557 - 167442nt              | (1)      | -----                                                                          |        |        |        |        |        |               |
| SARS-CoV-2 Reference Genome NC_045512.2              | (1)      | -----                                                                          |        |        |        |        |        |               |

## SARS-CoV-2 &amp; Bakterien.apr

|                                                      |          |                                                                                |        |        |        |        |        |               |
|------------------------------------------------------|----------|--------------------------------------------------------------------------------|--------|--------|--------|--------|--------|---------------|
|                                                      |          | Section 1507                                                                   |        |        |        |        |        |               |
|                                                      | (115963) | 115963                                                                         | 115973 | 115984 | 115995 | 116006 | 116017 | 116028 116039 |
| Candidatus Carsonella ruddii strain BT chromosome... | (115963) | ATTTAATTTTATAAAATCATTATATTTTTATAAAAAAATTATTAATCCGTACTTTATACCATCAAATTTACATG     |        |        |        |        |        |               |
| Candidatus Carsonella 135557 - 167442nt              | (1)      | -----                                                                          |        |        |        |        |        |               |
| SARS-CoV-2 Reference Genome NC_045512.2              | (1)      | -----                                                                          |        |        |        |        |        |               |
|                                                      |          | Section 1508                                                                   |        |        |        |        |        |               |
|                                                      | (116040) | 116040                                                                         | 116050 | 116061 | 116072 | 116083 | 116094 | 116105 116116 |
| Candidatus Carsonella ruddii strain BT chromosome... | (116040) | TATTTGAAAAAATCTTTAGATGAAATTGAATTATATAAATTTAAAAAAGAACAAAAATTTATATTTTCATTAATT    |        |        |        |        |        |               |
| Candidatus Carsonella 135557 - 167442nt              | (1)      | -----                                                                          |        |        |        |        |        |               |
| SARS-CoV-2 Reference Genome NC_045512.2              | (1)      | -----                                                                          |        |        |        |        |        |               |
|                                                      |          | Section 1509                                                                   |        |        |        |        |        |               |
|                                                      | (116117) | 116117                                                                         | 116127 | 116138 | 116149 | 116160 | 116171 | 116182 116193 |
| Candidatus Carsonella ruddii strain BT chromosome... | (116117) | ATATTAAATTTAATTCTTCAAATTTTAAATAATTTTTTCAAATATTATTTTAATTCATTTGAAGAAAAAATTC      |        |        |        |        |        |               |
| Candidatus Carsonella 135557 - 167442nt              | (1)      | -----                                                                          |        |        |        |        |        |               |
| SARS-CoV-2 Reference Genome NC_045512.2              | (1)      | -----                                                                          |        |        |        |        |        |               |
|                                                      |          | Section 1510                                                                   |        |        |        |        |        |               |
|                                                      | (116194) | 116194                                                                         | 116204 | 116215 | 116226 | 116237 | 116248 | 116259 116270 |
| Candidatus Carsonella ruddii strain BT chromosome... | (116194) | TTTGTAATTTAAATTAATAATTTTTTTTTTTTTTTTAAATTAATAAATGTTTTTTAATATTAGAAAATAAATCTA    |        |        |        |        |        |               |
| Candidatus Carsonella 135557 - 167442nt              | (1)      | -----                                                                          |        |        |        |        |        |               |
| SARS-CoV-2 Reference Genome NC_045512.2              | (1)      | -----                                                                          |        |        |        |        |        |               |
|                                                      |          | Section 1511                                                                   |        |        |        |        |        |               |
|                                                      | (116271) | 116271                                                                         | 116281 | 116292 | 116303 | 116314 | 116325 | 116336 116347 |
| Candidatus Carsonella ruddii strain BT chromosome... | (116271) | AATTTTTATATCTTAAATATTAAATAAAAAATTACAATCTTCTGCATAATTTGTTATAATAGAACAAATTATCTAAA  |        |        |        |        |        |               |
| Candidatus Carsonella 135557 - 167442nt              | (1)      | -----                                                                          |        |        |        |        |        |               |
| SARS-CoV-2 Reference Genome NC_045512.2              | (1)      | -----                                                                          |        |        |        |        |        |               |
|                                                      |          | Section 1512                                                                   |        |        |        |        |        |               |
|                                                      | (116348) | 116348                                                                         | 116358 | 116369 | 116380 | 116391 | 116402 | 116413 116424 |
| Candidatus Carsonella ruddii strain BT chromosome... | (116348) | AATGATGAATAAGGAATCATACCGTTTCTTGTAATAAATACCGTTTGTAGGTTTAAATCCTATTATATTAGAAAATGA |        |        |        |        |        |               |
| Candidatus Carsonella 135557 - 167442nt              | (1)      | -----                                                                          |        |        |        |        |        |               |
| SARS-CoV-2 Reference Genome NC_045512.2              | (1)      | -----                                                                          |        |        |        |        |        |               |

|                                                      |          |                                                                               |                        |                        |                        |                        |                        |                        |                        |
|------------------------------------------------------|----------|-------------------------------------------------------------------------------|------------------------|------------------------|------------------------|------------------------|------------------------|------------------------|------------------------|
|                                                      |          |                                                                               | Section 1513           |                        |                        |                        |                        |                        |                        |
|                                                      | (116425) | <a href="#">116425</a>                                                        | <a href="#">116435</a> | <a href="#">116446</a> | <a href="#">116457</a> | <a href="#">116468</a> | <a href="#">116479</a> | <a href="#">116490</a> | <a href="#">116501</a> |
| Candidatus Carsonella ruddii strain BT chromosome... | (116425) | TGAAGGAGTTCTACTCGAACCACCTGTATCACTTCCTAATGATAATAAATTACAACCATAAGAAATATTTAAACAAG |                        |                        |                        |                        |                        |                        |                        |
| Candidatus Carsonella 135557 - 167442nt              | (1)      | -----                                                                         |                        |                        |                        |                        |                        |                        |                        |
| SARS-CoV-2 Reference Genome NC_045512.2              | (1)      | -----                                                                         |                        |                        |                        |                        |                        |                        |                        |
|                                                      |          |                                                                               | Section 1514           |                        |                        |                        |                        |                        |                        |
|                                                      | (116502) | <a href="#">116502</a>                                                        | <a href="#">116512</a> | <a href="#">116523</a> | <a href="#">116534</a> | <a href="#">116545</a> | <a href="#">116556</a> | <a href="#">116567</a> | <a href="#">116578</a> |
| Candidatus Carsonella ruddii strain BT chromosome... | (116502) | AACCAGTTGATGATCCACCAATTATATTTTTTTTATTAAATAAATTTTTAAATTTAAGTTATTTATTCCATCACTA  |                        |                        |                        |                        |                        |                        |                        |
| Candidatus Carsonella 135557 - 167442nt              | (1)      | -----                                                                         |                        |                        |                        |                        |                        |                        |                        |
| SARS-CoV-2 Reference Genome NC_045512.2              | (1)      | -----                                                                         |                        |                        |                        |                        |                        |                        |                        |
|                                                      |          |                                                                               | Section 1515           |                        |                        |                        |                        |                        |                        |
|                                                      | (116579) | <a href="#">116579</a>                                                        | <a href="#">116589</a> | <a href="#">116600</a> | <a href="#">116611</a> | <a href="#">116622</a> | <a href="#">116633</a> | <a href="#">116644</a> | <a href="#">116655</a> |
| Candidatus Carsonella ruddii strain BT chromosome... | (116579) | CCTAAACAAAATTCATCTAATAAATCTATTGATAAAATATTAAATTTATTTATTTTTAAATTTTTTACAATATCTGA |                        |                        |                        |                        |                        |                        |                        |
| Candidatus Carsonella 135557 - 167442nt              | (1)      | -----                                                                         |                        |                        |                        |                        |                        |                        |                        |
| SARS-CoV-2 Reference Genome NC_045512.2              | (1)      | -----                                                                         |                        |                        |                        |                        |                        |                        |                        |
|                                                      |          |                                                                               | Section 1516           |                        |                        |                        |                        |                        |                        |
|                                                      | (116656) | <a href="#">116656</a>                                                        | <a href="#">116666</a> | <a href="#">116677</a> | <a href="#">116688</a> | <a href="#">116699</a> | <a href="#">116710</a> | <a href="#">116721</a> | <a href="#">116732</a> |
| Candidatus Carsonella ruddii strain BT chromosome... | (116656) | ATTATATTTTGAATTATGTTTTTTTAAATATTTGAATTTGATGTTAATTTTTTGTTTTTAATTGAAAAAATATTTT  |                        |                        |                        |                        |                        |                        |                        |
| Candidatus Carsonella 135557 - 167442nt              | (1)      | -----                                                                         |                        |                        |                        |                        |                        |                        |                        |
| SARS-CoV-2 Reference Genome NC_045512.2              | (1)      | -----                                                                         |                        |                        |                        |                        |                        |                        |                        |
|                                                      |          |                                                                               | Section 1517           |                        |                        |                        |                        |                        |                        |
|                                                      | (116733) | <a href="#">116733</a>                                                        | <a href="#">116743</a> | <a href="#">116754</a> | <a href="#">116765</a> | <a href="#">116776</a> | <a href="#">116787</a> | <a href="#">116798</a> | <a href="#">116809</a> |
| Candidatus Carsonella ruddii strain BT chromosome... | (116733) | TTAATGATATAGGTATAGCAAATGTTTTTTTATTATCTAATTGTTTAGCAAAATTTAATGATTCTTTATAAAAAAAA |                        |                        |                        |                        |                        |                        |                        |
| Candidatus Carsonella 135557 - 167442nt              | (1)      | -----                                                                         |                        |                        |                        |                        |                        |                        |                        |
| SARS-CoV-2 Reference Genome NC_045512.2              | (1)      | -----                                                                         |                        |                        |                        |                        |                        |                        |                        |
|                                                      |          |                                                                               | Section 1518           |                        |                        |                        |                        |                        |                        |
|                                                      | (116810) | <a href="#">116810</a>                                                        | <a href="#">116820</a> | <a href="#">116831</a> | <a href="#">116842</a> | <a href="#">116853</a> | <a href="#">116864</a> | <a href="#">116875</a> | <a href="#">116886</a> |
| Candidatus Carsonella ruddii strain BT chromosome... | (116810) | TCAATAATAAAATTATTTTTTTTATTAAATTTTATTAAATTATTTAAACAACATTTAGTTAATTCATAATTAGATAT |                        |                        |                        |                        |                        |                        |                        |
| Candidatus Carsonella 135557 - 167442nt              | (1)      | -----                                                                         |                        |                        |                        |                        |                        |                        |                        |
| SARS-CoV-2 Reference Genome NC_045512.2              | (1)      | -----                                                                         |                        |                        |                        |                        |                        |                        |                        |

|                                                      |          |                                                                                |        |        |        |        |        |               |
|------------------------------------------------------|----------|--------------------------------------------------------------------------------|--------|--------|--------|--------|--------|---------------|
|                                                      |          | Section 1519                                                                   |        |        |        |        |        |               |
|                                                      | (116887) | 116887                                                                         | 116897 | 116908 | 116919 | 116930 | 116941 | 116952 116963 |
| Candidatus Carsonella ruddii strain BT chromosome... | (116887) | TATTTTATTTTTTAACAGTAAAAATATTTTTTTAATAACCAATTTTACACAAAAAATTCATTTTTTTTATATTTTTTA |        |        |        |        |        |               |
| Candidatus Carsonella 135557 - 167442nt              | (1)      | -----                                                                          |        |        |        |        |        |               |
| SARS-CoV-2 Reference Genome NC_045512.2              | (1)      | -----                                                                          |        |        |        |        |        |               |
|                                                      |          | Section 1520                                                                   |        |        |        |        |        |               |
|                                                      | (116964) | 116964                                                                         | 116974 | 116985 | 116996 | 117007 | 117018 | 117029 117040 |
| Candidatus Carsonella ruddii strain BT chromosome... | (116964) | TTATATTTTTTATATATTTTTTATTTTATAAAAAATTTTAAATAAATTTTTTTATTATAATTATTTATAAAAAATTTT |        |        |        |        |        |               |
| Candidatus Carsonella 135557 - 167442nt              | (1)      | -----                                                                          |        |        |        |        |        |               |
| SARS-CoV-2 Reference Genome NC_045512.2              | (1)      | -----                                                                          |        |        |        |        |        |               |
|                                                      |          | Section 1521                                                                   |        |        |        |        |        |               |
|                                                      | (117041) | 117041                                                                         | 117051 | 117062 | 117073 | 117084 | 117095 | 117106 117117 |
| Candidatus Carsonella ruddii strain BT chromosome... | (117041) | CTTTAAAGATTTTATGTTAAAATTATTAAAAATTTATGATTTTAGAACTATTGTTTAAATTTTGAATATAAAAAAT   |        |        |        |        |        |               |
| Candidatus Carsonella 135557 - 167442nt              | (1)      | -----                                                                          |        |        |        |        |        |               |
| SARS-CoV-2 Reference Genome NC_045512.2              | (1)      | -----                                                                          |        |        |        |        |        |               |
|                                                      |          | Section 1522                                                                   |        |        |        |        |        |               |
|                                                      | (117118) | 117118                                                                         | 117128 | 117139 | 117150 | 117161 | 117172 | 117183 117194 |
| Candidatus Carsonella ruddii strain BT chromosome... | (117118) | ATTTAATGATATTCATATCTATTCCAAAAGGTAGAAATTTTTGTTTTTCATTATTAATATTAAAAAAATAAAAAATT  |        |        |        |        |        |               |
| Candidatus Carsonella 135557 - 167442nt              | (1)      | -----                                                                          |        |        |        |        |        |               |
| SARS-CoV-2 Reference Genome NC_045512.2              | (1)      | -----                                                                          |        |        |        |        |        |               |
|                                                      |          | Section 1523                                                                   |        |        |        |        |        |               |
|                                                      | (117195) | 117195                                                                         | 117205 | 117216 | 117227 | 117238 | 117249 | 117260 117271 |
| Candidatus Carsonella ruddii strain BT chromosome... | (117195) | ATTTTATTAGAAATTATATATAGAAAAATAATATTAAAAACAAATAGAAAAAATATTTTATAATTATTTTAAAAAA   |        |        |        |        |        |               |
| Candidatus Carsonella 135557 - 167442nt              | (1)      | -----                                                                          |        |        |        |        |        |               |
| SARS-CoV-2 Reference Genome NC_045512.2              | (1)      | -----                                                                          |        |        |        |        |        |               |
|                                                      |          | Section 1524                                                                   |        |        |        |        |        |               |
|                                                      | (117272) | 117272                                                                         | 117282 | 117293 | 117304 | 117315 | 117326 | 117337 117348 |
| Candidatus Carsonella ruddii strain BT chromosome... | (117272) | TAAAGATTTACAAAAAATATTAAATTATGGTTTAAACAAATTTAAGTATTATTGGTTCAGATTTATTAATAAATAATT |        |        |        |        |        |               |
| Candidatus Carsonella 135557 - 167442nt              | (1)      | -----                                                                          |        |        |        |        |        |               |
| SARS-CoV-2 Reference Genome NC_045512.2              | (1)      | -----                                                                          |        |        |        |        |        |               |

|                                                      |          |                                                                                |        |        |        |        |        |               |
|------------------------------------------------------|----------|--------------------------------------------------------------------------------|--------|--------|--------|--------|--------|---------------|
|                                                      |          | Section 1525                                                                   |        |        |        |        |        |               |
|                                                      | (117349) | 117349                                                                         | 117359 | 117370 | 117381 | 117392 | 117403 | 117414 117425 |
| Candidatus Carsonella ruddii strain BT chromosome... | (117349) | ATAAAAAAAAATAATAAAATTAAAAAAAAATAATAGTTATTTGTTTTAAATAATAATAATATTATTGTGACTAAATTT |        |        |        |        |        |               |
| Candidatus Carsonella 135557 - 167442nt              | (1)      | -----                                                                          |        |        |        |        |        |               |
| SARS-CoV-2 Reference Genome NC_045512.2              | (1)      | -----                                                                          |        |        |        |        |        |               |
|                                                      |          | Section 1526                                                                   |        |        |        |        |        |               |
|                                                      | (117426) | 117426                                                                         | 117436 | 117447 | 117458 | 117469 | 117480 | 117491 117502 |
| Candidatus Carsonella ruddii strain BT chromosome... | (117426) | TTTAATTTGTGTAATTATTATAATATAAAAAAATTTAATTTAAAAATTAAATGGAGTTTTAGAATTTTTTTCTAATTT |        |        |        |        |        |               |
| Candidatus Carsonella 135557 - 167442nt              | (1)      | -----                                                                          |        |        |        |        |        |               |
| SARS-CoV-2 Reference Genome NC_045512.2              | (1)      | -----                                                                          |        |        |        |        |        |               |
|                                                      |          | Section 1527                                                                   |        |        |        |        |        |               |
|                                                      | (117503) | 117503                                                                         | 117513 | 117524 | 117535 | 117546 | 117557 | 117568 117579 |
| Candidatus Carsonella ruddii strain BT chromosome... | (117503) | TAAAAATTATGGATTATTGGATATAACAGAACTAATAAACTCTTTATGAAAATAAATTATTTCTAAAAAATTTT     |        |        |        |        |        |               |
| Candidatus Carsonella 135557 - 167442nt              | (1)      | -----                                                                          |        |        |        |        |        |               |
| SARS-CoV-2 Reference Genome NC_045512.2              | (1)      | -----                                                                          |        |        |        |        |        |               |
|                                                      |          | Section 1528                                                                   |        |        |        |        |        |               |
|                                                      | (117580) | 117580                                                                         | 117590 | 117601 | 117612 | 117623 | 117634 | 117645 117656 |
| Candidatus Carsonella ruddii strain BT chromosome... | (117580) | TACAAAAAATAAATTTATTTATAATTTTAAAAAATTTAAAAAATAATAATAAATAATTAATAAAAAATGTTAAA     |        |        |        |        |        |               |
| Candidatus Carsonella 135557 - 167442nt              | (1)      | -----                                                                          |        |        |        |        |        |               |
| SARS-CoV-2 Reference Genome NC_045512.2              | (1)      | -----                                                                          |        |        |        |        |        |               |
|                                                      |          | Section 1529                                                                   |        |        |        |        |        |               |
|                                                      | (117657) | 117657                                                                         | 117667 | 117678 | 117689 | 117700 | 117711 | 117722 117733 |
| Candidatus Carsonella ruddii strain BT chromosome... | (117657) | AATTTTAGATAATATTATTTTATAAAAAAATATTTTAAAAATTAAAGATAAAGTAAAAATAATTATTAAAGACA     |        |        |        |        |        |               |
| Candidatus Carsonella 135557 - 167442nt              | (1)      | -----                                                                          |        |        |        |        |        |               |
| SARS-CoV-2 Reference Genome NC_045512.2              | (1)      | -----                                                                          |        |        |        |        |        |               |
|                                                      |          | Section 1530                                                                   |        |        |        |        |        |               |
|                                                      | (117734) | 117734                                                                         | 117744 | 117755 | 117766 | 117777 | 117788 | 117799 117810 |
| Candidatus Carsonella ruddii strain BT chromosome... | (117734) | TTAAAAAATATACAGAAATGCATTAATTTATTATATTAAAAAATAGATGGTATTTGTTTAAATAATATTAAAAAA    |        |        |        |        |        |               |
| Candidatus Carsonella 135557 - 167442nt              | (1)      | -----                                                                          |        |        |        |        |        |               |
| SARS-CoV-2 Reference Genome NC_045512.2              | (1)      | -----                                                                          |        |        |        |        |        |               |

|                                                      |          |                                                                               |        |        |        |        |        |               |
|------------------------------------------------------|----------|-------------------------------------------------------------------------------|--------|--------|--------|--------|--------|---------------|
|                                                      |          | Section 1531                                                                  |        |        |        |        |        |               |
|                                                      | (117811) | 117811                                                                        | 117821 | 117832 | 117843 | 117854 | 117865 | 117876 117887 |
| Candidatus Carsonella ruddii strain BT chromosome... | (117811) | ATAATATTAAATAATAATGTATTAAAAAACATATAAAAAATTAATATTTATAAAAAAAATATTAAAGAAAT       |        |        |        |        |        |               |
| Candidatus Carsonella 135557 - 167442nt              | (1)      | -----                                                                         |        |        |        |        |        |               |
| SARS-CoV-2 Reference Genome NC_045512.2              | (1)      | -----                                                                         |        |        |        |        |        |               |
|                                                      |          | Section 1532                                                                  |        |        |        |        |        |               |
|                                                      | (117888) | 117888                                                                        | 117898 | 117909 | 117920 | 117931 | 117942 | 117953 117964 |
| Candidatus Carsonella ruddii strain BT chromosome... | (117888) | ATATATAAGGCTTAAAGGTATCATTTTCATAATTTTATTAATTCATGGCAAATAAATAACAAAAAGATATTATAT   |        |        |        |        |        |               |
| Candidatus Carsonella 135557 - 167442nt              | (1)      | -----                                                                         |        |        |        |        |        |               |
| SARS-CoV-2 Reference Genome NC_045512.2              | (1)      | -----                                                                         |        |        |        |        |        |               |
|                                                      |          | Section 1533                                                                  |        |        |        |        |        |               |
|                                                      | (117965) | 117965                                                                        | 117975 | 117986 | 117997 | 118008 | 118019 | 118030 118041 |
| Candidatus Carsonella ruddii strain BT chromosome... | (117965) | ATGGTCAAAAATAAATTGTATTGAAAAATTTGTATTTATGTTCTGGTGGAATACAATTTATCCATCTTCAATT     |        |        |        |        |        |               |
| Candidatus Carsonella 135557 - 167442nt              | (1)      | -----                                                                         |        |        |        |        |        |               |
| SARS-CoV-2 Reference Genome NC_045512.2              | (1)      | -----                                                                         |        |        |        |        |        |               |
|                                                      |          | Section 1534                                                                  |        |        |        |        |        |               |
|                                                      | (118042) | 118042                                                                        | 118052 | 118063 | 118074 | 118085 | 118096 | 118107 118118 |
| Candidatus Carsonella ruddii strain BT chromosome... | (118042) | TTTATGAATTGTTCTCCATCTTTAATATATAAACCAAAAAATAATTTTATGATCTCTCCAATAAAAAATGGTTTAAT |        |        |        |        |        |               |
| Candidatus Carsonella 135557 - 167442nt              | (1)      | -----                                                                         |        |        |        |        |        |               |
| SARS-CoV-2 Reference Genome NC_045512.2              | (1)      | -----                                                                         |        |        |        |        |        |               |
|                                                      |          | Section 1535                                                                  |        |        |        |        |        |               |
|                                                      | (118119) | 118119                                                                        | 118129 | 118140 | 118151 | 118162 | 118173 | 118184 118195 |
| Candidatus Carsonella ruddii strain BT chromosome... | (118119) | TTCAAATTTAATTTTATCTATTTTCATATTTAAATAATATAAAAAATAATTTTTTCAGGTGGTGTTTCATACTTTAT |        |        |        |        |        |               |
| Candidatus Carsonella 135557 - 167442nt              | (1)      | -----                                                                         |        |        |        |        |        |               |
| SARS-CoV-2 Reference Genome NC_045512.2              | (1)      | -----                                                                         |        |        |        |        |        |               |
|                                                      |          | Section 1536                                                                  |        |        |        |        |        |               |
|                                                      | (118196) | 118196                                                                        | 118206 | 118217 | 118228 | 118239 | 118250 | 118261 118272 |
| Candidatus Carsonella ruddii strain BT chromosome... | (118196) | CTTGTGTTGTATTTCGGAACAAAAATATAATAAAAGTTGATAAAATAACTGGTCCTGGAAATTATTTTGTTACAAAA |        |        |        |        |        |               |
| Candidatus Carsonella 135557 - 167442nt              | (1)      | -----                                                                         |        |        |        |        |        |               |
| SARS-CoV-2 Reference Genome NC_045512.2              | (1)      | -----                                                                         |        |        |        |        |        |               |



|                                                      |          |                                                                               |        |        |        |        |        |               |
|------------------------------------------------------|----------|-------------------------------------------------------------------------------|--------|--------|--------|--------|--------|---------------|
|                                                      |          | Section 1537                                                                  |        |        |        |        |        |               |
|                                                      | (118273) | 118273                                                                        | 118283 | 118294 | 118305 | 118316 | 118327 | 118338 118349 |
| Candidatus Carsonella ruddii strain BT chromosome... | (118273) | GCTAAAAAAATATTTTTTGGTAATATTGGTATAGATATGCTTGCTGGACCATCAGAATTAATAATAGTTTGTGACTC |        |        |        |        |        |               |
| Candidatus Carsonella 135557 - 167442nt              | (1)      | -----                                                                         |        |        |        |        |        |               |
| SARS-CoV-2 Reference Genome NC_045512.2              | (1)      | -----                                                                         |        |        |        |        |        |               |
|                                                      |          | Section 1538                                                                  |        |        |        |        |        |               |
|                                                      | (118350) | 118350                                                                        | 118360 | 118371 | 118382 | 118393 | 118404 | 118415 118426 |
| Candidatus Carsonella ruddii strain BT chromosome... | (118350) | TAATATTCATCCATATATAATATCTTTAGATTTTTTTCTCAATTAGAACATGATATTTATGCATCTTGATTGTTT   |        |        |        |        |        |               |
| Candidatus Carsonella 135557 - 167442nt              | (1)      | -----                                                                         |        |        |        |        |        |               |
| SARS-CoV-2 Reference Genome NC_045512.2              | (1)      | -----                                                                         |        |        |        |        |        |               |
|                                                      |          | Section 1539                                                                  |        |        |        |        |        |               |
|                                                      | (118427) | 118427                                                                        | 118437 | 118448 | 118459 | 118470 | 118481 | 118492 118503 |
| Candidatus Carsonella ruddii strain BT chromosome... | (118427) | TATCTAATAATAAAAAATATTTAAATTTATTATATAAAACTATATATAAATTATTAAAAATTCAAAAAATAAAAAA  |        |        |        |        |        |               |
| Candidatus Carsonella 135557 - 167442nt              | (1)      | -----                                                                         |        |        |        |        |        |               |
| SARS-CoV-2 Reference Genome NC_045512.2              | (1)      | -----                                                                         |        |        |        |        |        |               |
|                                                      |          | Section 1540                                                                  |        |        |        |        |        |               |
|                                                      | (118504) | 118504                                                                        | 118514 | 118525 | 118536 | 118547 | 118558 | 118569 118580 |
| Candidatus Carsonella ruddii strain BT chromosome... | (118504) | ATAATTTTTAAATCTTTAAAAAATAGTTTTTTATTATTTAAAAAAATAATAAATATAATTGAAATAATAAATTTTTT |        |        |        |        |        |               |
| Candidatus Carsonella 135557 - 167442nt              | (1)      | -----                                                                         |        |        |        |        |        |               |
| SARS-CoV-2 Reference Genome NC_045512.2              | (1)      | -----                                                                         |        |        |        |        |        |               |
|                                                      |          | Section 1541                                                                  |        |        |        |        |        |               |
|                                                      | (118581) | 118581                                                                        | 118591 | 118602 | 118613 | 118624 | 118635 | 118646 118657 |
| Candidatus Carsonella ruddii strain BT chromosome... | (118581) | TTCTCCTGAACATTTAATGTTATGTATTAAAAATTCAAATAAAATATTAAAAATATTTAAAAATTGTGGAGCAATTT |        |        |        |        |        |               |
| Candidatus Carsonella 135557 - 167442nt              | (1)      | -----                                                                         |        |        |        |        |        |               |
| SARS-CoV-2 Reference Genome NC_045512.2              | (1)      | -----                                                                         |        |        |        |        |        |               |
|                                                      |          | Section 1542                                                                  |        |        |        |        |        |               |
|                                                      | (118658) | 118658                                                                        | 118668 | 118679 | 118690 | 118701 | 118712 | 118723 118734 |
| Candidatus Carsonella ruddii strain BT chromosome... | (118658) | TTTTAAACTATAATACAAGCGAACTTATGGTGATTATATGATAGGACCAAGTCACGTTATTCCAACATAATAAACA  |        |        |        |        |        |               |
| Candidatus Carsonella 135557 - 167442nt              | (1)      | -----                                                                         |        |        |        |        |        |               |
| SARS-CoV-2 Reference Genome NC_045512.2              | (1)      | -----                                                                         |        |        |        |        |        |               |

## SARS-CoV-2 &amp; Bakterien.apr

|                                                      |          |                                                                               |        |        |        |        |        |               |
|------------------------------------------------------|----------|-------------------------------------------------------------------------------|--------|--------|--------|--------|--------|---------------|
|                                                      |          | Section 1543                                                                  |        |        |        |        |        |               |
|                                                      | (118735) | 118735                                                                        | 118745 | 118756 | 118767 | 118778 | 118789 | 118800 118811 |
| Candidatus Carsonella ruddii strain BT chromosome... | (118735) | TCTAAATTTTTTCTTCATTAAATATTAATGATTTTGTAAAAAATAGGAATTATTAAAAATTATTAATAACAATTA   |        |        |        |        |        |               |
| Candidatus Carsonella 135557 - 167442nt              | (1)      | -----                                                                         |        |        |        |        |        |               |
| SARS-CoV-2 Reference Genome NC_045512.2              | (1)      | -----                                                                         |        |        |        |        |        |               |
|                                                      |          | Section 1544                                                                  |        |        |        |        |        |               |
|                                                      | (118812) | 118812                                                                        | 118822 | 118833 | 118844 | 118855 | 118866 | 118877 118888 |
| Candidatus Carsonella ruddii strain BT chromosome... | (118812) | TTCAAAAAATATCTTCATTTATTTCAAAAAATAGAACATTTCTTTCTCATTTCATATTCTTCTATAATTAGAAAAAT |        |        |        |        |        |               |
| Candidatus Carsonella 135557 - 167442nt              | (1)      | -----                                                                         |        |        |        |        |        |               |
| SARS-CoV-2 Reference Genome NC_045512.2              | (1)      | -----                                                                         |        |        |        |        |        |               |
|                                                      |          | Section 1545                                                                  |        |        |        |        |        |               |
|                                                      | (118889) | 118889                                                                        | 118899 | 118910 | 118921 | 118932 | 118943 | 118954 118965 |
| Candidatus Carsonella ruddii strain BT chromosome... | (118889) | GATTTTAATAAATTGTAAAAATAAAATTTTAGGAAGGATAAGTTCAATAATTAGTAACTTATAATTAATTTTAATT  |        |        |        |        |        |               |
| Candidatus Carsonella 135557 - 167442nt              | (1)      | -----                                                                         |        |        |        |        |        |               |
| SARS-CoV-2 Reference Genome NC_045512.2              | (1)      | -----                                                                         |        |        |        |        |        |               |
|                                                      |          | Section 1546                                                                  |        |        |        |        |        |               |
|                                                      | (118966) | 118966                                                                        | 118976 | 118987 | 118998 | 119009 | 119020 | 119031 119042 |
| Candidatus Carsonella ruddii strain BT chromosome... | (118966) | TTTTTAAAAAATTTTTTTTTTTTTTTTATTTAATGTTAATTATATTTTAATTAAAAAATCATTTTTTTTCACAT    |        |        |        |        |        |               |
| Candidatus Carsonella 135557 - 167442nt              | (1)      | -----                                                                         |        |        |        |        |        |               |
| SARS-CoV-2 Reference Genome NC_045512.2              | (1)      | -----                                                                         |        |        |        |        |        |               |
|                                                      |          | Section 1547                                                                  |        |        |        |        |        |               |
|                                                      | (119043) | 119043                                                                        | 119053 | 119064 | 119075 | 119086 | 119097 | 119108 119119 |
| Candidatus Carsonella ruddii strain BT chromosome... | (119043) | TCTGGTTATATAGGTAATGAAAAATTAAAAAATAATTTACAAATTTAAAAAATGTATTTTGAATGTT           |        |        |        |        |        |               |
| Candidatus Carsonella 135557 - 167442nt              | (1)      | -----                                                                         |        |        |        |        |        |               |
| SARS-CoV-2 Reference Genome NC_045512.2              | (1)      | -----                                                                         |        |        |        |        |        |               |
|                                                      |          | Section 1548                                                                  |        |        |        |        |        |               |
|                                                      | (119120) | 119120                                                                        | 119130 | 119141 | 119152 | 119163 | 119174 | 119185 119196 |
| Candidatus Carsonella ruddii strain BT chromosome... | (119120) | ACCTAAAAACAAAAAAGAATATTTCTTATGAAAAAATATTTTATTTTGAAAACAAAATTATATGAAATATATATC   |        |        |        |        |        |               |
| Candidatus Carsonella 135557 - 167442nt              | (1)      | -----                                                                         |        |        |        |        |        |               |
| SARS-CoV-2 Reference Genome NC_045512.2              | (1)      | -----                                                                         |        |        |        |        |        |               |

|                                                      |          |                                                                                 |        |        |        |        |        |               |
|------------------------------------------------------|----------|---------------------------------------------------------------------------------|--------|--------|--------|--------|--------|---------------|
|                                                      |          | Section 1549                                                                    |        |        |        |        |        |               |
|                                                      | (119197) | 119197                                                                          | 119207 | 119218 | 119229 | 119240 | 119251 | 119262 119273 |
| Candidatus Carsonella ruddii strain BT chromosome... | (119197) | ATTTTCTAAAAAAAAAACTTCTAGAAAGTAAAGTAATTATGAAATTTGGAATTGGAATTATTTTAATAAATAATAAAAA |        |        |        |        |        |               |
| Candidatus Carsonella 135557 - 167442nt              | (1)      | -----                                                                           |        |        |        |        |        |               |
| SARS-CoV-2 Reference Genome NC_045512.2              | (1)      | -----                                                                           |        |        |        |        |        |               |
|                                                      |          | Section 1550                                                                    |        |        |        |        |        |               |
|                                                      | (119274) | 119274                                                                          | 119284 | 119295 | 119306 | 119317 | 119328 | 119339 119350 |
| Candidatus Carsonella ruddii strain BT chromosome... | (119274) | CAATTTTAGATTATTTTGGAAAAAATTTTAATAATAATATAATTATATTTTCCTTTATTAATATCAAATTTAAAAAAT  |        |        |        |        |        |               |
| Candidatus Carsonella 135557 - 167442nt              | (1)      | -----                                                                           |        |        |        |        |        |               |
| SARS-CoV-2 Reference Genome NC_045512.2              | (1)      | -----                                                                           |        |        |        |        |        |               |
|                                                      |          | Section 1551                                                                    |        |        |        |        |        |               |
|                                                      | (119351) | 119351                                                                          | 119361 | 119372 | 119383 | 119394 | 119405 | 119416 119427 |
| Candidatus Carsonella ruddii strain BT chromosome... | (119351) | TTTAATTTTTTAATAAAAAGTAAAAGGAGGTGGAAAAAATTCACAAATATTTTGTATTAAAATTTCTATTTGTAAATG  |        |        |        |        |        |               |
| Candidatus Carsonella 135557 - 167442nt              | (1)      | -----                                                                           |        |        |        |        |        |               |
| SARS-CoV-2 Reference Genome NC_045512.2              | (1)      | -----                                                                           |        |        |        |        |        |               |
|                                                      |          | Section 1552                                                                    |        |        |        |        |        |               |
|                                                      | (119428) | 119428                                                                          | 119438 | 119449 | 119460 | 119471 | 119482 | 119493 119504 |
| Candidatus Carsonella ruddii strain BT chromosome... | (119428) | TATATTATTATTTAATTATAAACTAAAAAAAAAATTTAGAAAATTAAATTTTTTTCTGTAGATGATAGAATTGTGG    |        |        |        |        |        |               |
| Candidatus Carsonella 135557 - 167442nt              | (1)      | -----                                                                           |        |        |        |        |        |               |
| SARS-CoV-2 Reference Genome NC_045512.2              | (1)      | -----                                                                           |        |        |        |        |        |               |
|                                                      |          | Section 1553                                                                    |        |        |        |        |        |               |
|                                                      | (119505) | 119505                                                                          | 119515 | 119526 | 119537 | 119548 | 119559 | 119570 119581 |
| Candidatus Carsonella ruddii strain BT chromosome... | (119505) | AAAGAAAAAATATGGTAAAAAATCAAGAAAACTGAACAATATTCAAAAAGATAATTTTTTTTTTATTAATATA       |        |        |        |        |        |               |
| Candidatus Carsonella 135557 - 167442nt              | (1)      | -----                                                                           |        |        |        |        |        |               |
| SARS-CoV-2 Reference Genome NC_045512.2              | (1)      | -----                                                                           |        |        |        |        |        |               |
|                                                      |          | Section 1554                                                                    |        |        |        |        |        |               |
|                                                      | (119582) | 119582                                                                          | 119592 | 119603 | 119614 | 119625 | 119636 | 119647 119658 |
| Candidatus Carsonella ruddii strain BT chromosome... | (119582) | TAATATATGTATTACATAATATAGGAAAGTTAAAAAATTTATTTTAAACAGAAAAAATTTTTTTTAATAATTT       |        |        |        |        |        |               |
| Candidatus Carsonella 135557 - 167442nt              | (1)      | -----                                                                           |        |        |        |        |        |               |
| SARS-CoV-2 Reference Genome NC_045512.2              | (1)      | -----                                                                           |        |        |        |        |        |               |

## SARS-CoV-2 &amp; Bakterien.apr

|                                                      |          |                                                                                  |        |        |        |        |        |               |
|------------------------------------------------------|----------|----------------------------------------------------------------------------------|--------|--------|--------|--------|--------|---------------|
|                                                      |          | Section 1555                                                                     |        |        |        |        |        |               |
|                                                      | (119659) | 119659                                                                           | 119669 | 119680 | 119691 | 119702 | 119713 | 119724 119735 |
| Candidatus Carsonella ruddii strain BT chromosome... | (119659) | GAAAAAAAAAAAAAAAAATACTTAAAATTGGTTAGTTTAAAAAGATAAAATTTTAACTTAATTTAACTTATGAATATGA  |        |        |        |        |        |               |
| Candidatus Carsonella 135557 - 167442nt              | (1)      | -----                                                                            |        |        |        |        |        |               |
| SARS-CoV-2 Reference Genome NC_045512.2              | (1)      | -----                                                                            |        |        |        |        |        |               |
|                                                      |          | Section 1556                                                                     |        |        |        |        |        |               |
|                                                      | (119736) | 119736                                                                           | 119746 | 119757 | 119768 | 119779 | 119790 | 119801 119812 |
| Candidatus Carsonella ruddii strain BT chromosome... | (119736) | TAAATAAACATATAACTTTTTTGGCTAATAAAATTTAATAAAAAATATAAAATGTATTGATTGACGTTTGGTTTTGGT   |        |        |        |        |        |               |
| Candidatus Carsonella 135557 - 167442nt              | (1)      | -----                                                                            |        |        |        |        |        |               |
| SARS-CoV-2 Reference Genome NC_045512.2              | (1)      | -----                                                                            |        |        |        |        |        |               |
|                                                      |          | Section 1557                                                                     |        |        |        |        |        |               |
|                                                      | (119813) | 119813                                                                           | 119823 | 119834 | 119845 | 119856 | 119867 | 119878 119889 |
| Candidatus Carsonella ruddii strain BT chromosome... | (119813) | GGGTATAATTTTATTTTATAATATTTACAATTTAATTTCAATAGATAAAAAATTTATCTTCTATATTAATTTCTAGAAA  |        |        |        |        |        |               |
| Candidatus Carsonella 135557 - 167442nt              | (1)      | -----                                                                            |        |        |        |        |        |               |
| SARS-CoV-2 Reference Genome NC_045512.2              | (1)      | -----                                                                            |        |        |        |        |        |               |
|                                                      |          | Section 1558                                                                     |        |        |        |        |        |               |
|                                                      | (119890) | 119890                                                                           | 119900 | 119911 | 119922 | 119933 | 119944 | 119955 119966 |
| Candidatus Carsonella ruddii strain BT chromosome... | (119890) | AATATTTAAGAAAAATTTTTTTTATTTTTTAATATAAAAAATAAAAAATTTTTTTTTTATATTAAAAAAATTTAATTTCA |        |        |        |        |        |               |
| Candidatus Carsonella 135557 - 167442nt              | (1)      | -----                                                                            |        |        |        |        |        |               |
| SARS-CoV-2 Reference Genome NC_045512.2              | (1)      | -----                                                                            |        |        |        |        |        |               |
|                                                      |          | Section 1559                                                                     |        |        |        |        |        |               |
|                                                      | (119967) | 119967                                                                           | 119977 | 119988 | 119999 | 120010 | 120021 | 120032 120043 |
| Candidatus Carsonella ruddii strain BT chromosome... | (119967) | AAAAAAGCAACTTATTAATTTATGATCAAGGTTTTAATAGTTGTGAAATAAAAAATTTTTTTTATTATTTTAAAAAA    |        |        |        |        |        |               |
| Candidatus Carsonella 135557 - 167442nt              | (1)      | -----                                                                            |        |        |        |        |        |               |
| SARS-CoV-2 Reference Genome NC_045512.2              | (1)      | -----                                                                            |        |        |        |        |        |               |
|                                                      |          | Section 1560                                                                     |        |        |        |        |        |               |
|                                                      | (120044) | 120044                                                                           | 120054 | 120065 | 120076 | 120087 | 120098 | 120109 120120 |
| Candidatus Carsonella ruddii strain BT chromosome... | (120044) | AAAAAATATAATTTTGAAAAAATAAAATAAATAAATTTATATTTTATATTTTATAAAATTATTTTATATTTAGA       |        |        |        |        |        |               |
| Candidatus Carsonella 135557 - 167442nt              | (1)      | -----                                                                            |        |        |        |        |        |               |
| SARS-CoV-2 Reference Genome NC_045512.2              | (1)      | -----                                                                            |        |        |        |        |        |               |

## SARS-CoV-2 &amp; Bakterien.apr

|                                                      |          |                                                                               |        |        |        |        |        |               |
|------------------------------------------------------|----------|-------------------------------------------------------------------------------|--------|--------|--------|--------|--------|---------------|
|                                                      |          | Section 1561                                                                  |        |        |        |        |        |               |
|                                                      | (120121) | 120121                                                                        | 120131 | 120142 | 120153 | 120164 | 120175 | 120186 120197 |
| Candidatus Carsonella ruddii strain BT chromosome... | (120121) | AAAAAAAAATTTTTATTGCATTATCAGTTTTTAATTTTACGATTATTATAAAACAATATTATTATATAAAAAAATTA |        |        |        |        |        |               |
| Candidatus Carsonella 135557 - 167442nt              | (1)      | -----                                                                         |        |        |        |        |        |               |
| SARS-CoV-2 Reference Genome NC_045512.2              | (1)      | -----                                                                         |        |        |        |        |        |               |
|                                                      |          | Section 1562                                                                  |        |        |        |        |        |               |
|                                                      | (120198) | 120198                                                                        | 120208 | 120219 | 120230 | 120241 | 120252 | 120263 120274 |
| Candidatus Carsonella ruddii strain BT chromosome... | (120198) | AAATTTTTAAATTTAAATTTTTAAATTTAAATTTGTTTGAAAAAAGTTAAATAACGGAATTAATAATTCATTTTT   |        |        |        |        |        |               |
| Candidatus Carsonella 135557 - 167442nt              | (1)      | -----                                                                         |        |        |        |        |        |               |
| SARS-CoV-2 Reference Genome NC_045512.2              | (1)      | -----                                                                         |        |        |        |        |        |               |
|                                                      |          | Section 1563                                                                  |        |        |        |        |        |               |
|                                                      | (120275) | 120275                                                                        | 120285 | 120296 | 120307 | 120318 | 120329 | 120340 120351 |
| Candidatus Carsonella ruddii strain BT chromosome... | (120275) | ATTATTTTATATGTTTAAAAAATAATTAAGTTAAATTTATTTTATTTAATAAAATCATTAATAATATTAAAA      |        |        |        |        |        |               |
| Candidatus Carsonella 135557 - 167442nt              | (1)      | -----                                                                         |        |        |        |        |        |               |
| SARS-CoV-2 Reference Genome NC_045512.2              | (1)      | -----                                                                         |        |        |        |        |        |               |
|                                                      |          | Section 1564                                                                  |        |        |        |        |        |               |
|                                                      | (120352) | 120352                                                                        | 120362 | 120373 | 120384 | 120395 | 120406 | 120417 120428 |
| Candidatus Carsonella ruddii strain BT chromosome... | (120352) | AAAAAAAAAATTTCAATTTTAGGTCCAATTGGAAATTACAGTTATAATATTTTATGTAAAAAATAAGTAAAAAATTT |        |        |        |        |        |               |
| Candidatus Carsonella 135557 - 167442nt              | (1)      | -----                                                                         |        |        |        |        |        |               |
| SARS-CoV-2 Reference Genome NC_045512.2              | (1)      | -----                                                                         |        |        |        |        |        |               |
|                                                      |          | Section 1565                                                                  |        |        |        |        |        |               |
|                                                      | (120429) | 120429                                                                        | 120439 | 120450 | 120461 | 120472 | 120483 | 120494 120505 |
| Candidatus Carsonella ruddii strain BT chromosome... | (120429) | AATCTATTTCTTTAATAAATATTAAATCTTGAAAAATAAAAAAATATAAATAATACCATATGAAAAATAACAACGG  |        |        |        |        |        |               |
| Candidatus Carsonella 135557 - 167442nt              | (1)      | -----                                                                         |        |        |        |        |        |               |
| SARS-CoV-2 Reference Genome NC_045512.2              | (1)      | -----                                                                         |        |        |        |        |        |               |
|                                                      |          | Section 1566                                                                  |        |        |        |        |        |               |
|                                                      | (120506) | 120506                                                                        | 120516 | 120527 | 120538 | 120549 | 120560 | 120571 120582 |
| Candidatus Carsonella ruddii strain BT chromosome... | (120506) | TGGTATTGTAAGAGATTGTTTGAATTATTATTTAAAAAAGATATTTATAAATAAAATAGTTATAAATAATATAA    |        |        |        |        |        |               |
| Candidatus Carsonella 135557 - 167442nt              | (1)      | -----                                                                         |        |        |        |        |        |               |
| SARS-CoV-2 Reference Genome NC_045512.2              | (1)      | -----                                                                         |        |        |        |        |        |               |

## SARS-CoV-2 &amp; Bakterien.apr

|                                                      |          |                                                                                    |        |        |        |        |        |               |
|------------------------------------------------------|----------|------------------------------------------------------------------------------------|--------|--------|--------|--------|--------|---------------|
|                                                      |          | Section 1567                                                                       |        |        |        |        |        |               |
|                                                      | (120583) | 120583                                                                             | 120593 | 120604 | 120615 | 120626 | 120637 | 120648 120659 |
| Candidatus Carsonella ruddii strain BT chromosome... | (120583) | AACATAATTTTTTTTTTATATAAAAAAAAAAAAAAGTTTTTTTTTTTACATAAACAGTCATATAAACAAATAAAAAAAAAAT |        |        |        |        |        |               |
| Candidatus Carsonella 135557 - 167442nt              | (1)      | -----                                                                              |        |        |        |        |        |               |
| SARS-CoV-2 Reference Genome NC_045512.2              | (1)      | -----                                                                              |        |        |        |        |        |               |
|                                                      |          | Section 1568                                                                       |        |        |        |        |        |               |
|                                                      | (120660) | 120660                                                                             | 120670 | 120681 | 120692 | 120703 | 120714 | 120725 120736 |
| Candidatus Carsonella ruddii strain BT chromosome... | (120660) | TTAATTTTATTTTTTAAAAAATTAAAAATCATATTTAATAATTCTAATTCAAATATTAGTAATGGTATAAATATATG      |        |        |        |        |        |               |
| Candidatus Carsonella 135557 - 167442nt              | (1)      | -----                                                                              |        |        |        |        |        |               |
| SARS-CoV-2 Reference Genome NC_045512.2              | (1)      | -----                                                                              |        |        |        |        |        |               |
|                                                      |          | Section 1569                                                                       |        |        |        |        |        |               |
|                                                      | (120737) | 120737                                                                             | 120747 | 120758 | 120769 | 120780 | 120791 | 120802 120813 |
| Candidatus Carsonella ruddii strain BT chromosome... | (120737) | TAATTATAACACAAAAAAATATTTCCATATAAATATAAAAAATATAAATTTAAAAGATAATTTTATAAATAAAACAA      |        |        |        |        |        |               |
| Candidatus Carsonella 135557 - 167442nt              | (1)      | -----                                                                              |        |        |        |        |        |               |
| SARS-CoV-2 Reference Genome NC_045512.2              | (1)      | -----                                                                              |        |        |        |        |        |               |
|                                                      |          | Section 1570                                                                       |        |        |        |        |        |               |
|                                                      | (120814) | 120814                                                                             | 120824 | 120835 | 120846 | 120857 | 120868 | 120879 120890 |
| Candidatus Carsonella ruddii strain BT chromosome... | (120814) | AATTTATTATAAATAAAAAATTCCTTTTGTAAAAAAATATTAAGTTTTTTTGTAAATAATTATTTTTTTTTTTGAA       |        |        |        |        |        |               |
| Candidatus Carsonella 135557 - 167442nt              | (1)      | -----                                                                              |        |        |        |        |        |               |
| SARS-CoV-2 Reference Genome NC_045512.2              | (1)      | -----                                                                              |        |        |        |        |        |               |
|                                                      |          | Section 1571                                                                       |        |        |        |        |        |               |
|                                                      | (120891) | 120891                                                                             | 120901 | 120912 | 120923 | 120934 | 120945 | 120956 120967 |
| Candidatus Carsonella ruddii strain BT chromosome... | (120891) | AAAAAATAACAATATATAAAAAAAAAAAAAATTATTTTATTTTGAAATATTTATTAATAGTTATAGAAAACTTTATT      |        |        |        |        |        |               |
| Candidatus Carsonella 135557 - 167442nt              | (1)      | -----                                                                              |        |        |        |        |        |               |
| SARS-CoV-2 Reference Genome NC_045512.2              | (1)      | -----                                                                              |        |        |        |        |        |               |
|                                                      |          | Section 1572                                                                       |        |        |        |        |        |               |
|                                                      | (120968) | 120968                                                                             | 120978 | 120989 | 121000 | 121011 | 121022 | 121033 121044 |
| Candidatus Carsonella ruddii strain BT chromosome... | (120968) | TTCAATGAAAAATATTAAAAATAAAATTTTGTGTTACAGGTTTTTATAATATATTATGAAATCATATTTTAA           |        |        |        |        |        |               |
| Candidatus Carsonella 135557 - 167442nt              | (1)      | -----                                                                              |        |        |        |        |        |               |
| SARS-CoV-2 Reference Genome NC_045512.2              | (1)      | -----                                                                              |        |        |        |        |        |               |

## SARS-CoV-2 &amp; Bakterien.apr

|                                                      |          |                                                                                |        |        |        |        |        |               |
|------------------------------------------------------|----------|--------------------------------------------------------------------------------|--------|--------|--------|--------|--------|---------------|
|                                                      |          | Section 1573                                                                   |        |        |        |        |        |               |
|                                                      | (121045) | 121045                                                                         | 121055 | 121066 | 121077 | 121088 | 121099 | 121110 121121 |
| Candidatus Carsonella ruddii strain BT chromosome... | (121045) | AATAAAAAATATAAATATAAAAAAAATTTTTAAATTCTGGAGATAAAATCAATTTCTCATAGATCCATTATTTATT   |        |        |        |        |        |               |
| Candidatus Carsonella 135557 - 167442nt              | (1)      | -----                                                                          |        |        |        |        |        |               |
| SARS-CoV-2 Reference Genome NC_045512.2              | (1)      | -----                                                                          |        |        |        |        |        |               |
|                                                      |          | Section 1574                                                                   |        |        |        |        |        |               |
|                                                      | (121122) | 121122                                                                         | 121132 | 121143 | 121154 | 121165 | 121176 | 121187 121198 |
| Candidatus Carsonella ruddii strain BT chromosome... | (121122) | CATTAATTAAAAATTGTATAATAGAAATTAATAATTTATTAGAAATCTTTTGATATAATATCAACAATAAATTTATGT |        |        |        |        |        |               |
| Candidatus Carsonella 135557 - 167442nt              | (1)      | -----                                                                          |        |        |        |        |        |               |
| SARS-CoV-2 Reference Genome NC_045512.2              | (1)      | -----                                                                          |        |        |        |        |        |               |
|                                                      |          | Section 1575                                                                   |        |        |        |        |        |               |
|                                                      | (121199) | 121199                                                                         | 121209 | 121220 | 121231 | 121242 | 121253 | 121264 121275 |
| Candidatus Carsonella ruddii strain BT chromosome... | (121199) | AAAAATTTAGGAATTTATATTTATGGACCAATAAATTCTTACGTTTTAATTTCTTCTTTAAAAA               |        |        |        |        |        |               |
| Candidatus Carsonella 135557 - 167442nt              | (1)      | -----                                                                          |        |        |        |        |        |               |
| SARS-CoV-2 Reference Genome NC_045512.2              | (1)      | -----                                                                          |        |        |        |        |        |               |
|                                                      |          | Section 1576                                                                   |        |        |        |        |        |               |
|                                                      | (121276) | 121276                                                                         | 121286 | 121297 | 121308 | 121319 | 121330 | 121341 121352 |
| Candidatus Carsonella ruddii strain BT chromosome... | (121276) | AAATAAAATTAATTTTATAGGTAATTCAGGAACAACAATAAGAATAAGTTTATCTTTGTTAATAACTAATAATATCA  |        |        |        |        |        |               |
| Candidatus Carsonella 135557 - 167442nt              | (1)      | -----                                                                          |        |        |        |        |        |               |
| SARS-CoV-2 Reference Genome NC_045512.2              | (1)      | -----                                                                          |        |        |        |        |        |               |
|                                                      |          | Section 1577                                                                   |        |        |        |        |        |               |
|                                                      | (121353) | 121353                                                                         | 121363 | 121374 | 121385 | 121396 | 121407 | 121418 121429 |
| Candidatus Carsonella ruddii strain BT chromosome... | (121353) | TTTTAGGTGATAAATCTTTAAATAAGAGAACAATGTATAGAATAATTAACCATTAACTTTATTAGGTTTTATTATA   |        |        |        |        |        |               |
| Candidatus Carsonella 135557 - 167442nt              | (1)      | -----                                                                          |        |        |        |        |        |               |
| SARS-CoV-2 Reference Genome NC_045512.2              | (1)      | -----                                                                          |        |        |        |        |        |               |
|                                                      |          | Section 1578                                                                   |        |        |        |        |        |               |
|                                                      | (121430) | 121430                                                                         | 121440 | 121451 | 121462 | 121473 | 121484 | 121495 121506 |
| Candidatus Carsonella ruddii strain BT chromosome... | (121430) | CAATGTAAAAAAATTTCTTTTCTCCTATAATAATTTTAAAAAAATAATTTAGGATTAAATATAATCTTGTA        |        |        |        |        |        |               |
| Candidatus Carsonella 135557 - 167442nt              | (1)      | -----                                                                          |        |        |        |        |        |               |
| SARS-CoV-2 Reference Genome NC_045512.2              | (1)      | -----                                                                          |        |        |        |        |        |               |

## SARS-CoV-2 &amp; Bakterien.apr

|                                                      |          |                                                                                |        |        |        |        |        |               |
|------------------------------------------------------|----------|--------------------------------------------------------------------------------|--------|--------|--------|--------|--------|---------------|
|                                                      |          | Section 1579                                                                   |        |        |        |        |        |               |
|                                                      | (121507) | 121507                                                                         | 121517 | 121528 | 121539 | 121550 | 121561 | 121572 121583 |
| Candidatus Carsonella ruddii strain BT chromosome... | (121507) | CGCAAGTTCTCAAATAAAATCTTGTTTAAATTTTATCATCAATTAATTCTTTTATAAATATATATATAAAAGAAAATA |        |        |        |        |        |               |
| Candidatus Carsonella 135557 - 167442nt              | (1)      | -----                                                                          |        |        |        |        |        |               |
| SARS-CoV-2 Reference Genome NC_045512.2              | (1)      | -----                                                                          |        |        |        |        |        |               |
|                                                      |          | Section 1580                                                                   |        |        |        |        |        |               |
|                                                      | (121584) | 121584                                                                         | 121594 | 121605 | 121616 | 121627 | 121638 | 121649 121660 |
| Candidatus Carsonella ruddii strain BT chromosome... | (121584) | AAAAACAAGAGATCATAGTGAAAGATTTTAAATATTTTAATTAAAAAATGATTTTTTAATAAAAAATATTA        |        |        |        |        |        |               |
| Candidatus Carsonella 135557 - 167442nt              | (1)      | -----                                                                          |        |        |        |        |        |               |
| SARS-CoV-2 Reference Genome NC_045512.2              | (1)      | -----                                                                          |        |        |        |        |        |               |
|                                                      |          | Section 1581                                                                   |        |        |        |        |        |               |
|                                                      | (121661) | 121661                                                                         | 121671 | 121682 | 121693 | 121704 | 121715 | 121726 121737 |
| Candidatus Carsonella ruddii strain BT chromosome... | (121661) | AATGATTTTTCATCATTTTTCATTTATAATTAGTTATTATTATTTAATTAAAAAATTTTATTTTAAATTTTAATTT   |        |        |        |        |        |               |
| Candidatus Carsonella 135557 - 167442nt              | (1)      | -----                                                                          |        |        |        |        |        |               |
| SARS-CoV-2 Reference Genome NC_045512.2              | (1)      | -----                                                                          |        |        |        |        |        |               |
|                                                      |          | Section 1582                                                                   |        |        |        |        |        |               |
|                                                      | (121738) | 121738                                                                         | 121748 | 121759 | 121770 | 121781 | 121792 | 121803 121814 |
| Candidatus Carsonella ruddii strain BT chromosome... | (121738) | TAATAAATTAAGAATAGGTTTTTTTTGAATATTTAATAAAAAATAGGATTTTTTTTTTATATTATTAAAAAATTA    |        |        |        |        |        |               |
| Candidatus Carsonella 135557 - 167442nt              | (1)      | -----                                                                          |        |        |        |        |        |               |
| SARS-CoV-2 Reference Genome NC_045512.2              | (1)      | -----                                                                          |        |        |        |        |        |               |
|                                                      |          | Section 1583                                                                   |        |        |        |        |        |               |
|                                                      | (121815) | 121815                                                                         | 121825 | 121836 | 121847 | 121858 | 121869 | 121880 121891 |
| Candidatus Carsonella ruddii strain BT chromosome... | (121815) | TTAATAATGAACATTATGTAAAAATTTTAATTTTAAATAAAAAATAGTATAATTTATTCAAAAAACAATA         |        |        |        |        |        |               |
| Candidatus Carsonella 135557 - 167442nt              | (1)      | -----                                                                          |        |        |        |        |        |               |
| SARS-CoV-2 Reference Genome NC_045512.2              | (1)      | -----                                                                          |        |        |        |        |        |               |
|                                                      |          | Section 1584                                                                   |        |        |        |        |        |               |
|                                                      | (121892) | 121892                                                                         | 121902 | 121913 | 121924 | 121935 | 121946 | 121957 121968 |
| Candidatus Carsonella ruddii strain BT chromosome... | (121892) | TCTAAATTAATCGATGAAATTCAGTTTTAATTTCTTTAATTATAAAATATAAAACAAAAATTTATGGTTT         |        |        |        |        |        |               |
| Candidatus Carsonella 135557 - 167442nt              | (1)      | -----                                                                          |        |        |        |        |        |               |
| SARS-CoV-2 Reference Genome NC_045512.2              | (1)      | -----                                                                          |        |        |        |        |        |               |



## SARS-CoV-2 &amp; Bakterien.apr

|                                                      |          |                                                                                |        |        |        |        |        |               |
|------------------------------------------------------|----------|--------------------------------------------------------------------------------|--------|--------|--------|--------|--------|---------------|
|                                                      |          | Section 1585                                                                   |        |        |        |        |        |               |
|                                                      | (121969) | 121969                                                                         | 121979 | 121990 | 122001 | 122012 | 122023 | 122034 122045 |
| Candidatus Carsonella ruddii strain BT chromosome... | (121969) | AGAAGAATTAAATTTAAAGAATCTAATAGATATAATAGTATGTATTATAATTTATTATTATTAGGTATAAAAAATAA  |        |        |        |        |        |               |
| Candidatus Carsonella 135557 - 167442nt              | (1)      | -----                                                                          |        |        |        |        |        |               |
| SARS-CoV-2 Reference Genome NC_045512.2              | (1)      | -----                                                                          |        |        |        |        |        |               |
|                                                      |          | Section 1586                                                                   |        |        |        |        |        |               |
|                                                      | (122046) | 122046                                                                         | 122056 | 122067 | 122078 | 122089 | 122100 | 122111 122122 |
| Candidatus Carsonella ruddii strain BT chromosome... | (122046) | TAAAAAAAAAAAAATTATTTAATTTTTAAAAATAATAAAATTCATCCAAATTTAATTTTTCTCAATCAGATCACAGA  |        |        |        |        |        |               |
| Candidatus Carsonella 135557 - 167442nt              | (1)      | -----                                                                          |        |        |        |        |        |               |
| SARS-CoV-2 Reference Genome NC_045512.2              | (1)      | -----                                                                          |        |        |        |        |        |               |
|                                                      |          | Section 1587                                                                   |        |        |        |        |        |               |
|                                                      | (122123) | 122123                                                                         | 122133 | 122144 | 122155 | 122166 | 122177 | 122188 122199 |
| Candidatus Carsonella ruddii strain BT chromosome... | (122123) | TTATTTTATGTCATTTTATATAATTAATTTAAAAAATTTAAAAATTTCAAATCCTGAAAACACATTATCTTCTTTTCC |        |        |        |        |        |               |
| Candidatus Carsonella 135557 - 167442nt              | (1)      | -----                                                                          |        |        |        |        |        |               |
| SARS-CoV-2 Reference Genome NC_045512.2              | (1)      | -----                                                                          |        |        |        |        |        |               |
|                                                      |          | Section 1588                                                                   |        |        |        |        |        |               |
|                                                      | (122200) | 122200                                                                         | 122210 | 122221 | 122232 | 122243 | 122254 | 122265 122276 |
| Candidatus Carsonella ruddii strain BT chromosome... | (122200) | TAATTTTTTTAAATATTTTAATAATAAAAAACAATAAATTATATGTATTTAATTAATAATTTTATTAAAAGTAATATA |        |        |        |        |        |               |
| Candidatus Carsonella 135557 - 167442nt              | (1)      | -----                                                                          |        |        |        |        |        |               |
| SARS-CoV-2 Reference Genome NC_045512.2              | (1)      | -----                                                                          |        |        |        |        |        |               |
|                                                      |          | Section 1589                                                                   |        |        |        |        |        |               |
|                                                      | (122277) | 122277                                                                         | 122287 | 122298 | 122309 | 122320 | 122331 | 122342 122353 |
| Candidatus Carsonella ruddii strain BT chromosome... | (122277) | ATAATTTTTTTTGAAAATTTTTTAATAACAAATTTTTTAAAAACAATATTGATAGAAAAAATTTCTAAAAATTTAT   |        |        |        |        |        |               |
| Candidatus Carsonella 135557 - 167442nt              | (1)      | -----                                                                          |        |        |        |        |        |               |
| SARS-CoV-2 Reference Genome NC_045512.2              | (1)      | -----                                                                          |        |        |        |        |        |               |
|                                                      |          | Section 1590                                                                   |        |        |        |        |        |               |
|                                                      | (122354) | 122354                                                                         | 122364 | 122375 | 122386 | 122397 | 122408 | 122419 122430 |
| Candidatus Carsonella ruddii strain BT chromosome... | (122354) | AAAAAAAAATGTAATTTTTTTCAAGAAAAAGAAATTATTATAAATAATTATTTTTTTAGTTTTTTAACAAAAAAA    |        |        |        |        |        |               |
| Candidatus Carsonella 135557 - 167442nt              | (1)      | -----                                                                          |        |        |        |        |        |               |
| SARS-CoV-2 Reference Genome NC_045512.2              | (1)      | -----                                                                          |        |        |        |        |        |               |

SARS-CoV-2 & Bakterien.apr

|                                                      |          | Section 1591                                                                      |                        |                        |                        |                        |                        |                        |                        |
|------------------------------------------------------|----------|-----------------------------------------------------------------------------------|------------------------|------------------------|------------------------|------------------------|------------------------|------------------------|------------------------|
| Candidatus Carsonella ruddii strain BT chromosome... | (122431) | <a href="#">122431</a>                                                            | <a href="#">122441</a> | <a href="#">122452</a> | <a href="#">122463</a> | <a href="#">122474</a> | <a href="#">122485</a> | <a href="#">122496</a> | <a href="#">122507</a> |
| Candidatus Carsonella 135557 - 167442nt              | (122431) | TAAAATTTGGTTATTTTATAAATAATAACTTTAATATATTTTTACCTAATCATTATTATAAATACTAAAAAATAATA     |                        |                        |                        |                        |                        |                        |                        |
| SARS-CoV-2 Reference Genome NC_045512.2              | (1)      | -----                                                                             |                        |                        |                        |                        |                        |                        |                        |
| Section 1592                                         |          |                                                                                   |                        |                        |                        |                        |                        |                        |                        |
| Candidatus Carsonella ruddii strain BT chromosome... | (122508) | <a href="#">122508</a>                                                            | <a href="#">122518</a> | <a href="#">122529</a> | <a href="#">122540</a> | <a href="#">122551</a> | <a href="#">122562</a> | <a href="#">122573</a> | <a href="#">122584</a> |
| Candidatus Carsonella 135557 - 167442nt              | (122508) | TTTCCTAAAAAATTTTTTATTTTGAAATTTTATTTAAAAAATTTAATATAGAAAAAATTTTTGTTAGTAGAAAA        |                        |                        |                        |                        |                        |                        |                        |
| SARS-CoV-2 Reference Genome NC_045512.2              | (1)      | -----                                                                             |                        |                        |                        |                        |                        |                        |                        |
| Section 1593                                         |          |                                                                                   |                        |                        |                        |                        |                        |                        |                        |
| Candidatus Carsonella ruddii strain BT chromosome... | (122585) | <a href="#">122585</a>                                                            | <a href="#">122595</a> | <a href="#">122606</a> | <a href="#">122617</a> | <a href="#">122628</a> | <a href="#">122639</a> | <a href="#">122650</a> | <a href="#">122661</a> |
| Candidatus Carsonella 135557 - 167442nt              | (122585) | ATTTAATTTTAAAAAAAAAAAAAAAAAATTATATTTAAATATAATATAAATTTATTTAGGAATTATTTAAAAATGTAATAA |                        |                        |                        |                        |                        |                        |                        |
| SARS-CoV-2 Reference Genome NC_045512.2              | (1)      | -----                                                                             |                        |                        |                        |                        |                        |                        |                        |
| Section 1594                                         |          |                                                                                   |                        |                        |                        |                        |                        |                        |                        |
| Candidatus Carsonella ruddii strain BT chromosome... | (122662) | <a href="#">122662</a>                                                            | <a href="#">122672</a> | <a href="#">122683</a> | <a href="#">122694</a> | <a href="#">122705</a> | <a href="#">122716</a> | <a href="#">122727</a> | <a href="#">122738</a> |
| Candidatus Carsonella 135557 - 167442nt              | (122662) | ATTACGGAATTTTTATTGATATTGGACAAGCAGATGGATTACTTCATGTTTCAGATATTCCATTTTTTAAGAAAATA     |                        |                        |                        |                        |                        |                        |                        |
| SARS-CoV-2 Reference Genome NC_045512.2              | (1)      | -----                                                                             |                        |                        |                        |                        |                        |                        |                        |
| Section 1595                                         |          |                                                                                   |                        |                        |                        |                        |                        |                        |                        |
| Candidatus Carsonella ruddii strain BT chromosome... | (122739) | <a href="#">122739</a>                                                            | <a href="#">122749</a> | <a href="#">122760</a> | <a href="#">122771</a> | <a href="#">122782</a> | <a href="#">122793</a> | <a href="#">122804</a> | <a href="#">122815</a> |
| Candidatus Carsonella 135557 - 167442nt              | (122739) | TATAATAAATTGATAACAAAAAATATTATTTCTATTAAAGTAATAAAATTTGATAAAAAATTAAAAAAGTATCTTT      |                        |                        |                        |                        |                        |                        |                        |
| SARS-CoV-2 Reference Genome NC_045512.2              | (1)      | -----                                                                             |                        |                        |                        |                        |                        |                        |                        |
| Section 1596                                         |          |                                                                                   |                        |                        |                        |                        |                        |                        |                        |
| Candidatus Carsonella ruddii strain BT chromosome... | (122816) | <a href="#">122816</a>                                                            | <a href="#">122826</a> | <a href="#">122837</a> | <a href="#">122848</a> | <a href="#">122859</a> | <a href="#">122870</a> | <a href="#">122881</a> | <a href="#">122892</a> |
| Candidatus Carsonella 135557 - 167442nt              | (122816) | AAGTTTAAAAAATTTATAAAAAAATTATGAAAAATTTTCAATTTAAATATAATAAAATGTTATGCTAAACAAT         |                        |                        |                        |                        |                        |                        |                        |
| SARS-CoV-2 Reference Genome NC_045512.2              | (1)      | -----                                                                             |                        |                        |                        |                        |                        |                        |                        |

|                                                      |          |                                                                               |        |        |        |        |        |               |
|------------------------------------------------------|----------|-------------------------------------------------------------------------------|--------|--------|--------|--------|--------|---------------|
|                                                      |          | Section 1597                                                                  |        |        |        |        |        |               |
|                                                      | (122893) | 122893                                                                        | 122903 | 122914 | 122925 | 122936 | 122947 | 122958 122969 |
| Candidatus Carsonella ruddii strain BT chromosome... | (122893) | TTATTAATAATGGAGTAATTTGTTACAACAATTTAAGTAAAAAAATTATTTTATTTAATAAATTTATAAAATTTAAA |        |        |        |        |        |               |
| Candidatus Carsonella 135557 - 167442nt              | (1)      | -----                                                                         |        |        |        |        |        |               |
| SARS-CoV-2 Reference Genome NC_045512.2              | (1)      | -----                                                                         |        |        |        |        |        |               |
|                                                      |          | Section 1598                                                                  |        |        |        |        |        |               |
|                                                      | (122970) | 122970                                                                        | 122980 | 122991 | 123002 | 123013 | 123024 | 123035 123046 |
| Candidatus Carsonella ruddii strain BT chromosome... | (122970) | AAAAAGATACTTTAATTGCTTATTTTTTAAAAAAACAGAAAAATTTATATATTTAAATTTTAATTATAAAATTAAT  |        |        |        |        |        |               |
| Candidatus Carsonella 135557 - 167442nt              | (1)      | -----                                                                         |        |        |        |        |        |               |
| SARS-CoV-2 Reference Genome NC_045512.2              | (1)      | -----                                                                         |        |        |        |        |        |               |
|                                                      |          | Section 1599                                                                  |        |        |        |        |        |               |
|                                                      | (123047) | 123047                                                                        | 123057 | 123068 | 123079 | 123090 | 123101 | 123112 123123 |
| Candidatus Carsonella ruddii strain BT chromosome... | (123047) | AAAAACAATTTAAAATATCAAAAATTAATAATAAAATATAAATTTAATAATTTTTTTTTATTATCTTGTAAGT     |        |        |        |        |        |               |
| Candidatus Carsonella 135557 - 167442nt              | (1)      | -----                                                                         |        |        |        |        |        |               |
| SARS-CoV-2 Reference Genome NC_045512.2              | (1)      | -----                                                                         |        |        |        |        |        |               |
|                                                      |          | Section 1600                                                                  |        |        |        |        |        |               |
|                                                      | (123124) | 123124                                                                        | 123134 | 123145 | 123156 | 123167 | 123178 | 123189 123200 |
| Candidatus Carsonella ruddii strain BT chromosome... | (123124) | TAAAAATTTTATATAAAAAAATAATTTTTAATATTAAAAATTAATAATTTTATAAATTTTATATTTAAT         |        |        |        |        |        |               |
| Candidatus Carsonella 135557 - 167442nt              | (1)      | -----                                                                         |        |        |        |        |        |               |
| SARS-CoV-2 Reference Genome NC_045512.2              | (1)      | -----                                                                         |        |        |        |        |        |               |
|                                                      |          | Section 1601                                                                  |        |        |        |        |        |               |
|                                                      | (123201) | 123201                                                                        | 123211 | 123222 | 123233 | 123244 | 123255 | 123266 123277 |
| Candidatus Carsonella ruddii strain BT chromosome... | (123201) | TTAATTAATAATAATTTAATAAAATTGTTTTTATAAATAATAACTATTATTTAAAAACAACAATTATTATTAAA    |        |        |        |        |        |               |
| Candidatus Carsonella 135557 - 167442nt              | (1)      | -----                                                                         |        |        |        |        |        |               |
| SARS-CoV-2 Reference Genome NC_045512.2              | (1)      | -----                                                                         |        |        |        |        |        |               |
|                                                      |          | Section 1602                                                                  |        |        |        |        |        |               |
|                                                      | (123278) | 123278                                                                        | 123288 | 123299 | 123310 | 123321 | 123332 | 123343 123354 |
| Candidatus Carsonella ruddii strain BT chromosome... | (123278) | ATTAAAAATAAAAAAATTTTTTTTTTAAACATGTCAAAAATTTTAATATTTAAAAAAATTTTTTGTGTTTATAA    |        |        |        |        |        |               |
| Candidatus Carsonella 135557 - 167442nt              | (1)      | -----                                                                         |        |        |        |        |        |               |
| SARS-CoV-2 Reference Genome NC_045512.2              | (1)      | -----                                                                         |        |        |        |        |        |               |

## SARS-CoV-2 &amp; Bakterien.apr

|                                                      |          |                                                                                 |        |        |        |        |        |               |
|------------------------------------------------------|----------|---------------------------------------------------------------------------------|--------|--------|--------|--------|--------|---------------|
|                                                      |          | Section 1603                                                                    |        |        |        |        |        |               |
|                                                      | (123355) | 123355                                                                          | 123365 | 123376 | 123387 | 123398 | 123409 | 123420 123431 |
| Candidatus Carsonella ruddii strain BT chromosome... | (123355) | GAAAAATATTAATTTTTTTGTTTCATCAAAATCTGCAATCATAGCTTCTGTTGTGATTAATAATCCTCCTATTGATCCT |        |        |        |        |        |               |
| Candidatus Carsonella 135557 - 167442nt              | (1)      | -----                                                                           |        |        |        |        |        |               |
| SARS-CoV-2 Reference Genome NC_045512.2              | (1)      | -----                                                                           |        |        |        |        |        |               |
|                                                      |          | Section 1604                                                                    |        |        |        |        |        |               |
|                                                      | (123432) | 123432                                                                          | 123442 | 123453 | 123464 | 123475 | 123486 | 123497 123508 |
| Candidatus Carsonella ruddii strain BT chromosome... | (123432) | GCTGATTGTAAAGCACTTCTTGTAACCTTAAACAGGATCTATTATTTCCCATTTTAAACATATCACCATAAAATCCTGT |        |        |        |        |        |               |
| Candidatus Carsonella 135557 - 167442nt              | (1)      | -----                                                                           |        |        |        |        |        |               |
| SARS-CoV-2 Reference Genome NC_045512.2              | (1)      | -----                                                                           |        |        |        |        |        |               |
|                                                      |          | Section 1605                                                                    |        |        |        |        |        |               |
|                                                      | (123509) | 123509                                                                          | 123519 | 123530 | 123541 | 123552 | 123563 | 123574 123585 |
| Candidatus Carsonella ruddii strain BT chromosome... | (123509) | TGCAGCGTTATAACCAAAATTTTTTGAAGAAGATTTAATATTATTTAAACTATTGATGGTTCTTCACCAGAATTTT    |        |        |        |        |        |               |
| Candidatus Carsonella 135557 - 167442nt              | (1)      | -----                                                                           |        |        |        |        |        |               |
| SARS-CoV-2 Reference Genome NC_045512.2              | (1)      | -----                                                                           |        |        |        |        |        |               |
|                                                      |          | Section 1606                                                                    |        |        |        |        |        |               |
|                                                      | (123586) | 123586                                                                          | 123596 | 123607 | 123618 | 123629 | 123640 | 123651 123662 |
| Candidatus Carsonella ruddii strain BT chromosome... | (123586) | TTACTATTTGTTTTAATGGAGTTTCCAAAGATTTAAGAGCGATATAAATACCATAATTTTGATCGTTGTTTTCTCCT   |        |        |        |        |        |               |
| Candidatus Carsonella 135557 - 167442nt              | (1)      | -----                                                                           |        |        |        |        |        |               |
| SARS-CoV-2 Reference Genome NC_045512.2              | (1)      | -----                                                                           |        |        |        |        |        |               |
|                                                      |          | Section 1607                                                                    |        |        |        |        |        |               |
|                                                      | (123663) | 123663                                                                          | 123673 | 123684 | 123695 | 123706 | 123717 | 123728 123739 |
| Candidatus Carsonella ruddii strain BT chromosome... | (123663) | TTTAAATTTTTTAATTTTCTAAAATTCTAACTAAAGCAACTCCTCCACCAATTACTACTCCTTCTTCAACTGCTGC    |        |        |        |        |        |               |
| Candidatus Carsonella 135557 - 167442nt              | (1)      | -----                                                                           |        |        |        |        |        |               |
| SARS-CoV-2 Reference Genome NC_045512.2              | (1)      | -----                                                                           |        |        |        |        |        |               |
|                                                      |          | Section 1608                                                                    |        |        |        |        |        |               |
|                                                      | (123740) | 123740                                                                          | 123750 | 123761 | 123772 | 123783 | 123794 | 123805 123816 |
| Candidatus Carsonella ruddii strain BT chromosome... | (123740) | TCTAGTTGAATGTAAAGCATCTTCAATTCTTGCTTTTTTTCTTTCATTTCAATTTTCAGTAGCAGCACCTACTCTTA   |        |        |        |        |        |               |
| Candidatus Carsonella 135557 - 167442nt              | (1)      | -----                                                                           |        |        |        |        |        |               |
| SARS-CoV-2 Reference Genome NC_045512.2              | (1)      | -----                                                                           |        |        |        |        |        |               |

## SARS-CoV-2 &amp; Bakterien.apr

|                                                      |          |                                                                              |        |        |        |        |        |               |
|------------------------------------------------------|----------|------------------------------------------------------------------------------|--------|--------|--------|--------|--------|---------------|
|                                                      |          | Section 1609                                                                 |        |        |        |        |        |               |
|                                                      | (123817) | 123817                                                                       | 123827 | 123838 | 123849 | 123860 | 123871 | 123882 123893 |
| Candidatus Carsonella ruddii strain BT chromosome... | (123817) | TTACAGCAACTCCACCAGATAATTTAGCCATTCTTTCTTGTAATTTTCTTTATCATAATCAGAAGTTGATTCTGAA |        |        |        |        |        |               |
| Candidatus Carsonella 135557 - 167442nt              | (1)      | -----                                                                        |        |        |        |        |        |               |
| SARS-CoV-2 Reference Genome NC_045512.2              | (1)      | -----                                                                        |        |        |        |        |        |               |
|                                                      |          | Section 1610                                                                 |        |        |        |        |        |               |
|                                                      | (123894) | 123894                                                                       | 123904 | 123915 | 123926 | 123937 | 123948 | 123959 123970 |
| Candidatus Carsonella ruddii strain BT chromosome... | (123894) | ATTTGTTTTTTAATATTTTTAATTCTTTCTTTAATTTTAAATTCATTACCCGATCCTCCAACATAAATAGTGTTC  |        |        |        |        |        |               |
| Candidatus Carsonella 135557 - 167442nt              | (1)      | -----                                                                        |        |        |        |        |        |               |
| SARS-CoV-2 Reference Genome NC_045512.2              | (1)      | -----                                                                        |        |        |        |        |        |               |
|                                                      |          | Section 1611                                                                 |        |        |        |        |        |               |
|                                                      | (123971) | 123971                                                                       | 123981 | 123992 | 124003 | 124014 | 124025 | 124036 124047 |
| Candidatus Carsonella ruddii strain BT chromosome... | (123971) | TTTATTTGATGTAATTTTTTTAGCAAATCCTAAATCTTCAATTTTAATTTTATCTAATTGTATTCCAATTCATCTG |        |        |        |        |        |               |
| Candidatus Carsonella 135557 - 167442nt              | (1)      | -----                                                                        |        |        |        |        |        |               |
| SARS-CoV-2 Reference Genome NC_045512.2              | (1)      | -----                                                                        |        |        |        |        |        |               |
|                                                      |          | Section 1612                                                                 |        |        |        |        |        |               |
|                                                      | (124048) | 124048                                                                       | 124058 | 124069 | 124080 | 124091 | 124102 | 124113 124124 |
| Candidatus Carsonella ruddii strain BT chromosome... | (124048) | TAATAAAATTAGCACCAGTTAAAATTGAAATATCTTTTAAATATCTTTTCTTCTATCACCAAAACCAGGTGCTTTA |        |        |        |        |        |               |
| Candidatus Carsonella 135557 - 167442nt              | (1)      | -----                                                                        |        |        |        |        |        |               |
| SARS-CoV-2 Reference Genome NC_045512.2              | (1)      | -----                                                                        |        |        |        |        |        |               |
|                                                      |          | Section 1613                                                                 |        |        |        |        |        |               |
|                                                      | (124125) | 124125                                                                       | 124135 | 124146 | 124157 | 124168 | 124179 | 124190 124201 |
| Candidatus Carsonella ruddii strain BT chromosome... | (124125) | ACAGCACCTAATTTTATTATTCCTCTAATATTATTATAACTAATGTAGCTAAAGCTTCACCTTCTATATCTTCAGC |        |        |        |        |        |               |
| Candidatus Carsonella 135557 - 167442nt              | (1)      | -----                                                                        |        |        |        |        |        |               |
| SARS-CoV-2 Reference Genome NC_045512.2              | (1)      | -----                                                                        |        |        |        |        |        |               |
|                                                      |          | Section 1614                                                                 |        |        |        |        |        |               |
|                                                      | (124202) | 124202                                                                       | 124212 | 124223 | 124234 | 124245 | 124256 | 124267 124278 |
| Candidatus Carsonella ruddii strain BT chromosome... | (124202) | AATAATAAAAAGTGATTTATTTTTTTTTTGAATTAATTCTAAATATTAACATATCTCTAATATTATTTATTTTTT  |        |        |        |        |        |               |
| Candidatus Carsonella 135557 - 167442nt              | (1)      | -----                                                                        |        |        |        |        |        |               |
| SARS-CoV-2 Reference Genome NC_045512.2              | (1)      | -----                                                                        |        |        |        |        |        |               |

|                                                      |          |                                                                                 |        |        |        |        |        |               |
|------------------------------------------------------|----------|---------------------------------------------------------------------------------|--------|--------|--------|--------|--------|---------------|
|                                                      |          | Section 1615                                                                    |        |        |        |        |        |               |
|                                                      | (124279) | 124279                                                                          | 124289 | 124300 | 124311 | 124322 | 124333 | 124344 124355 |
| Candidatus Carsonella ruddii strain BT chromosome... | (124279) | TATCTGTTATTAAACAAAACAATTTTCTAAGATTAAAGACATATTTTCTTGATTATTAATAAAATAAGGAGAAATA    |        |        |        |        |        |               |
| Candidatus Carsonella 135557 - 167442nt              | (1)      | -----                                                                           |        |        |        |        |        |               |
| SARS-CoV-2 Reference Genome NC_045512.2              | (1)      | -----                                                                           |        |        |        |        |        |               |
|                                                      |          | Section 1616                                                                    |        |        |        |        |        |               |
|                                                      | (124356) | 124356                                                                          | 124366 | 124377 | 124388 | 124399 | 124410 | 124421 124432 |
| Candidatus Carsonella ruddii strain BT chromosome... | (124356) | TAACCTCTATCAAATTGCATACCTTCTACTACTTCTAATTCATCTTCAATTCCTTTTCCTTCATCAACTGTAATTAC   |        |        |        |        |        |               |
| Candidatus Carsonella 135557 - 167442nt              | (1)      | -----                                                                           |        |        |        |        |        |               |
| SARS-CoV-2 Reference Genome NC_045512.2              | (1)      | -----                                                                           |        |        |        |        |        |               |
|                                                      |          | Section 1617                                                                    |        |        |        |        |        |               |
|                                                      | (124433) | 124433                                                                          | 124443 | 124454 | 124465 | 124476 | 124487 | 124498 124509 |
| Candidatus Carsonella ruddii strain BT chromosome... | (124433) | TCCATTTTTTCCAACCTCTATTCATAGCATCAGAAATAATTTTTCCAATTATTTTTTCTCCATTAGCAGAAATTGTTTC |        |        |        |        |        |               |
| Candidatus Carsonella 135557 - 167442nt              | (1)      | -----                                                                           |        |        |        |        |        |               |
| SARS-CoV-2 Reference Genome NC_045512.2              | (1)      | -----                                                                           |        |        |        |        |        |               |
|                                                      |          | Section 1618                                                                    |        |        |        |        |        |               |
|                                                      | (124510) | 124510                                                                          | 124520 | 124531 | 124542 | 124553 | 124564 | 124575 124586 |
| Candidatus Carsonella ruddii strain BT chromosome... | (124510) | CTACTTGTGAAATTGATAAAGTATCTAAACATGGAATAGAAATTTTTTTTAATTCTAAAACAGCATGATAAATTGCT   |        |        |        |        |        |               |
| Candidatus Carsonella 135557 - 167442nt              | (1)      | -----                                                                           |        |        |        |        |        |               |
| SARS-CoV-2 Reference Genome NC_045512.2              | (1)      | -----                                                                           |        |        |        |        |        |               |
|                                                      |          | Section 1619                                                                    |        |        |        |        |        |               |
|                                                      | (124587) | 124587                                                                          | 124597 | 124608 | 124619 | 124630 | 124641 | 124652 124663 |
| Candidatus Carsonella ruddii strain BT chromosome... | (124587) | TTATCAATGCCTCTTTTTAAATCCATCGGATTCATTCCGGATATAACAGCTTTTATACCTTCATTTACTATTGATTG   |        |        |        |        |        |               |
| Candidatus Carsonella 135557 - 167442nt              | (1)      | -----                                                                           |        |        |        |        |        |               |
| SARS-CoV-2 Reference Genome NC_045512.2              | (1)      | -----                                                                           |        |        |        |        |        |               |
|                                                      |          | Section 1620                                                                    |        |        |        |        |        |               |
|                                                      | (124664) | 124664                                                                          | 124674 | 124685 | 124696 | 124707 | 124718 | 124729 124740 |
| Candidatus Carsonella ruddii strain BT chromosome... | (124664) | TGCTAAAACTGTAGCAGTTGTTGTTCCATCTCCTGCAACATCAGAAGTTTTAGATGCAACTTCTTTAACCATTGAG    |        |        |        |        |        |               |
| Candidatus Carsonella 135557 - 167442nt              | (1)      | -----                                                                           |        |        |        |        |        |               |
| SARS-CoV-2 Reference Genome NC_045512.2              | (1)      | -----                                                                           |        |        |        |        |        |               |

|                                                      |          |                                                                               |        |        |        |        |        |               |
|------------------------------------------------------|----------|-------------------------------------------------------------------------------|--------|--------|--------|--------|--------|---------------|
|                                                      |          | Section 1621                                                                  |        |        |        |        |        |               |
| Candidatus Carsonella ruddii strain BT chromosome... | (124741) | 124741                                                                        | 124751 | 124762 | 124773 | 124784 | 124795 | 124806 124817 |
| Candidatus Carsonella 135557 - 167442nt              | (124741) | CTCCCATATTTTCAAATTTATCTTTTAATTCTATTTCTTTTGCAACAGAAACTCCATCTTTAGTTACTAATGGAGAA |        |        |        |        |        |               |
| SARS-CoV-2 Reference Genome NC_045512.2              | (1)      | -----                                                                         |        |        |        |        |        |               |
|                                                      |          | Section 1622                                                                  |        |        |        |        |        |               |
| Candidatus Carsonella ruddii strain BT chromosome... | (124818) | 124818                                                                        | 124828 | 124839 | 124850 | 124861 | 124872 | 124883 124894 |
| Candidatus Carsonella 135557 - 167442nt              | (124818) | CTAAAATTTTATCTAAAATAACATTTCTTCCTTTTGACCAAGAGTAGTTTAAACCGCATTTGCTAATAAATTTAC   |        |        |        |        |        |               |
| SARS-CoV-2 Reference Genome NC_045512.2              | (1)      | -----                                                                         |        |        |        |        |        |               |
|                                                      |          | Section 1623                                                                  |        |        |        |        |        |               |
| Candidatus Carsonella ruddii strain BT chromosome... | (124895) | 124895                                                                        | 124905 | 124916 | 124927 | 124938 | 124949 | 124960 124971 |
| Candidatus Carsonella 135557 - 167442nt              | (124895) | ACCATTTGCTAAATTTTTCTAGCTTCATCACCAAATTTAATTTTTTAAACCCATTTTATTTGATAATAGAAATT    |        |        |        |        |        |               |
| SARS-CoV-2 Reference Genome NC_045512.2              | (1)      | -----                                                                         |        |        |        |        |        |               |
|                                                      |          | Section 1624                                                                  |        |        |        |        |        |               |
| Candidatus Carsonella ruddii strain BT chromosome... | (124972) | 124972                                                                        | 124982 | 124993 | 125004 | 125015 | 125026 | 125037 125048 |
| Candidatus Carsonella 135557 - 167442nt              | (124972) | ATATCATTTTCTTTAAGAAAAAATACTCTTTTTCATTTACTTTATATTTTTCTATATTATAACTATCTTTAAAAAT  |        |        |        |        |        |               |
| SARS-CoV-2 Reference Genome NC_045512.2              | (1)      | -----                                                                         |        |        |        |        |        |               |
|                                                      |          | Section 1625                                                                  |        |        |        |        |        |               |
| Candidatus Carsonella ruddii strain BT chromosome... | (125049) | 125049                                                                        | 125059 | 125070 | 125081 | 125092 | 125103 | 125114 125125 |
| Candidatus Carsonella 135557 - 167442nt              | (125049) | TATTATATCTCCAATATTAACAATTAATGGTTTTAAACTCCATTTTCTAATAGTTTTCCACATCCAATTTTATTA   |        |        |        |        |        |               |
| SARS-CoV-2 Reference Genome NC_045512.2              | (1)      | -----                                                                         |        |        |        |        |        |               |
|                                                      |          | Section 1626                                                                  |        |        |        |        |        |               |
| Candidatus Carsonella ruddii strain BT chromosome... | (125126) | 125126                                                                        | 125136 | 125147 | 125158 | 125169 | 125180 | 125191 125202 |
| Candidatus Carsonella 135557 - 167442nt              | (125126) | TTTTTCCTTTTAAATATTATTTTCATTTTGTAGGTATATAAATACTTCCTATTTTATTTTCTTCATCTAATTTTATT |        |        |        |        |        |               |
| SARS-CoV-2 Reference Genome NC_045512.2              | (1)      | -----                                                                         |        |        |        |        |        |               |

|                                                      |          |                                                                                |        |        |        |        |        |               |
|------------------------------------------------------|----------|--------------------------------------------------------------------------------|--------|--------|--------|--------|--------|---------------|
|                                                      |          | Section 1627                                                                   |        |        |        |        |        |               |
|                                                      | (125203) | 125203                                                                         | 125213 | 125224 | 125235 | 125246 | 125257 | 125268 125279 |
| Candidatus Carsonella ruddii strain BT chromosome... | (125203) | ACAACAATTTTATCATATAAAGGTATAAAATCCATTTTTTTTAAAAAAAAAATATTTTTTAAATAATTAAAAATTAAT |        |        |        |        |        |               |
| Candidatus Carsonella 135557 - 167442nt              | (1)      | -----                                                                          |        |        |        |        |        |               |
| SARS-CoV-2 Reference Genome NC_045512.2              | (1)      | -----                                                                          |        |        |        |        |        |               |
|                                                      |          | Section 1628                                                                   |        |        |        |        |        |               |
|                                                      | (125280) | 125280                                                                         | 125290 | 125301 | 125312 | 125323 | 125334 | 125345 125356 |
| Candidatus Carsonella ruddii strain BT chromosome... | (125280) | AAAAAATAACAGATATTTTCAATAATAACGTTATTTTTTAATTTTTATTATTTTGACATATTATGAAAAATTAAT    |        |        |        |        |        |               |
| Candidatus Carsonella 135557 - 167442nt              | (1)      | -----                                                                          |        |        |        |        |        |               |
| SARS-CoV-2 Reference Genome NC_045512.2              | (1)      | -----                                                                          |        |        |        |        |        |               |
|                                                      |          | Section 1629                                                                   |        |        |        |        |        |               |
|                                                      | (125357) | 125357                                                                         | 125367 | 125378 | 125389 | 125400 | 125411 | 125422 125433 |
| Candidatus Carsonella ruddii strain BT chromosome... | (125357) | AAGAAATTAAAATAGGTAATTAACTCAATAGGTAGAGTATCAGTTTACATACTGAAAGTTACAAGTTCAAATCTTG   |        |        |        |        |        |               |
| Candidatus Carsonella 135557 - 167442nt              | (1)      | -----                                                                          |        |        |        |        |        |               |
| SARS-CoV-2 Reference Genome NC_045512.2              | (1)      | -----                                                                          |        |        |        |        |        |               |
|                                                      |          | Section 1630                                                                   |        |        |        |        |        |               |
|                                                      | (125434) | 125434                                                                         | 125444 | 125455 | 125466 | 125477 | 125488 | 125499 125510 |
| Candidatus Carsonella ruddii strain BT chromosome... | (125434) | TATTACCTATTTTTGGATTGATAGTTTAGTTGGTTAAATGTTGGCCTGTCACGCTGAATATCACGGGTTCAAATCC   |        |        |        |        |        |               |
| Candidatus Carsonella 135557 - 167442nt              | (1)      | -----                                                                          |        |        |        |        |        |               |
| SARS-CoV-2 Reference Genome NC_045512.2              | (1)      | -----                                                                          |        |        |        |        |        |               |
|                                                      |          | Section 1631                                                                   |        |        |        |        |        |               |
|                                                      | (125511) | 125511                                                                         | 125521 | 125532 | 125543 | 125554 | 125565 | 125576 125587 |
| Candidatus Carsonella ruddii strain BT chromosome... | (125511) | CGTTCAATCCGTAATTTATTTAAAAAATAATATAATAATTATAAATTTTAGAAAAATTTAAAAAAAATAAAAAATTT  |        |        |        |        |        |               |
| Candidatus Carsonella 135557 - 167442nt              | (1)      | -----                                                                          |        |        |        |        |        |               |
| SARS-CoV-2 Reference Genome NC_045512.2              | (1)      | -----                                                                          |        |        |        |        |        |               |
|                                                      |          | Section 1632                                                                   |        |        |        |        |        |               |
|                                                      | (125588) | 125588                                                                         | 125598 | 125609 | 125620 | 125631 | 125642 | 125653 125664 |
| Candidatus Carsonella ruddii strain BT chromosome... | (125588) | TAATTAAATTAAAAATTAAATTTTTTTTTTTTAAATTTATTTTTTAAAAAAAATACTTTTTAAAAAATAATTTTTTT  |        |        |        |        |        |               |
| Candidatus Carsonella 135557 - 167442nt              | (1)      | -----                                                                          |        |        |        |        |        |               |
| SARS-CoV-2 Reference Genome NC_045512.2              | (1)      | -----                                                                          |        |        |        |        |        |               |



|                                                      |          |                                                                                 |        |        |        |        |        |               |
|------------------------------------------------------|----------|---------------------------------------------------------------------------------|--------|--------|--------|--------|--------|---------------|
|                                                      |          | Section 1633                                                                    |        |        |        |        |        |               |
|                                                      | (125665) | 125665                                                                          | 125675 | 125686 | 125697 | 125708 | 125719 | 125730 125741 |
| Candidatus Carsonella ruddii strain BT chromosome... | (125665) | TGTATTTTTTTTAAAAATAAAATAAGAAAAAAATTTTTTAATAAAAAATTATGTAGTTTTATTTTATTAAAAAATAA   |        |        |        |        |        |               |
| Candidatus Carsonella 135557 - 167442nt              | (1)      | -----                                                                           |        |        |        |        |        |               |
| SARS-CoV-2 Reference Genome NC_045512.2              | (1)      | -----                                                                           |        |        |        |        |        |               |
|                                                      |          | Section 1634                                                                    |        |        |        |        |        |               |
|                                                      | (125742) | 125742                                                                          | 125752 | 125763 | 125774 | 125785 | 125796 | 125807 125818 |
| Candidatus Carsonella ruddii strain BT chromosome... | (125742) | CGGAAATTTATATTTCATGTATAAGAAGCTTGTTATATATATAATATAATACCTGTTTTAAATTATAAAAAAATAAAA  |        |        |        |        |        |               |
| Candidatus Carsonella 135557 - 167442nt              | (1)      | -----                                                                           |        |        |        |        |        |               |
| SARS-CoV-2 Reference Genome NC_045512.2              | (1)      | -----                                                                           |        |        |        |        |        |               |
|                                                      |          | Section 1635                                                                    |        |        |        |        |        |               |
|                                                      | (125819) | 125819                                                                          | 125829 | 125840 | 125851 | 125862 | 125873 | 125884 125895 |
| Candidatus Carsonella ruddii strain BT chromosome... | (125819) | TAATAAATTCCTTATTTTAAATAATATTTTATTTATAAAAAATATTTATTTTTTTACAAAATATATAAAAAATAAAATT |        |        |        |        |        |               |
| Candidatus Carsonella 135557 - 167442nt              | (1)      | -----                                                                           |        |        |        |        |        |               |
| SARS-CoV-2 Reference Genome NC_045512.2              | (1)      | -----                                                                           |        |        |        |        |        |               |
|                                                      |          | Section 1636                                                                    |        |        |        |        |        |               |
|                                                      | (125896) | 125896                                                                          | 125906 | 125917 | 125928 | 125939 | 125950 | 125961 125972 |
| Candidatus Carsonella ruddii strain BT chromosome... | (125896) | ATTATAAGTTTAAACAATTAATTCAAAACTTTATTAAAAAAATAGTTTTAAAAATTAAATTTATTATTTTTATAGG    |        |        |        |        |        |               |
| Candidatus Carsonella 135557 - 167442nt              | (1)      | -----                                                                           |        |        |        |        |        |               |
| SARS-CoV-2 Reference Genome NC_045512.2              | (1)      | -----                                                                           |        |        |        |        |        |               |
|                                                      |          | Section 1637                                                                    |        |        |        |        |        |               |
|                                                      | (125973) | 125973                                                                          | 125983 | 125994 | 126005 | 126016 | 126027 | 126038 126049 |
| Candidatus Carsonella ruddii strain BT chromosome... | (125973) | AAATGAAAAAAATCATTGTCTAAAAAATACCTTAAAAAAGTGATATTTTACTTAAATTAATACTTATAGAAAAA      |        |        |        |        |        |               |
| Candidatus Carsonella 135557 - 167442nt              | (1)      | -----                                                                           |        |        |        |        |        |               |
| SARS-CoV-2 Reference Genome NC_045512.2              | (1)      | -----                                                                           |        |        |        |        |        |               |
|                                                      |          | Section 1638                                                                    |        |        |        |        |        |               |
|                                                      | (126050) | 126050                                                                          | 126060 | 126071 | 126082 | 126093 | 126104 | 126115 126126 |
| Candidatus Carsonella ruddii strain BT chromosome... | (126050) | AAAGTTTAAATGTTAATGTTGTTAATGGAATTATATTAAATTTTTTAAATGAATAAATATAATATATATATAATTT    |        |        |        |        |        |               |
| Candidatus Carsonella 135557 - 167442nt              | (1)      | -----                                                                           |        |        |        |        |        |               |
| SARS-CoV-2 Reference Genome NC_045512.2              | (1)      | -----                                                                           |        |        |        |        |        |               |

## SARS-CoV-2 &amp; Bakterien.apr

|                                                      |          |                                                                                |        |        |        |        |        |               |
|------------------------------------------------------|----------|--------------------------------------------------------------------------------|--------|--------|--------|--------|--------|---------------|
|                                                      |          | Section 1639                                                                   |        |        |        |        |        |               |
|                                                      | (126127) | 126127                                                                         | 126137 | 126148 | 126159 | 126170 | 126181 | 126192 126203 |
| Candidatus Carsonella ruddii strain BT chromosome... | (126127) | TTGAAAAAAAAAAAAATAGATTCATATTCAAATTTCTTAAAAAGTTTTCTTCTTTTTTTTTTAAGATCAAAAAGTAAT |        |        |        |        |        |               |
| Candidatus Carsonella 135557 - 167442nt              | (1)      | -----                                                                          |        |        |        |        |        |               |
| SARS-CoV-2 Reference Genome NC_045512.2              | (1)      | -----                                                                          |        |        |        |        |        |               |
|                                                      |          | Section 1640                                                                   |        |        |        |        |        |               |
|                                                      | (126204) | 126204                                                                         | 126214 | 126225 | 126236 | 126247 | 126258 | 126269 126280 |
| Candidatus Carsonella ruddii strain BT chromosome... | (126204) | ATTTTAAAAATTTTAGATTTTGGTAATTATTTTGTAAATAAAAAATAAAAAAGAATTTTTTTTTTAGAAATAAATTG  |        |        |        |        |        |               |
| Candidatus Carsonella 135557 - 167442nt              | (1)      | -----                                                                          |        |        |        |        |        |               |
| SARS-CoV-2 Reference Genome NC_045512.2              | (1)      | -----                                                                          |        |        |        |        |        |               |
|                                                      |          | Section 1641                                                                   |        |        |        |        |        |               |
|                                                      | (126281) | 126281                                                                         | 126291 | 126302 | 126313 | 126324 | 126335 | 126346 126357 |
| Candidatus Carsonella ruddii strain BT chromosome... | (126281) | TAAAAAAAAAAGTATTAAACAAAATACCTAAACTTTTAAAAACAAAAAAGAATTAATAATTTTTTTTTTAATTTTAA  |        |        |        |        |        |               |
| Candidatus Carsonella 135557 - 167442nt              | (1)      | -----                                                                          |        |        |        |        |        |               |
| SARS-CoV-2 Reference Genome NC_045512.2              | (1)      | -----                                                                          |        |        |        |        |        |               |
|                                                      |          | Section 1642                                                                   |        |        |        |        |        |               |
|                                                      | (126358) | 126358                                                                         | 126368 | 126379 | 126390 | 126401 | 126412 | 126423 126434 |
| Candidatus Carsonella ruddii strain BT chromosome... | (126358) | AAAATAATATAAACAAATATTTATTAAATATATTTTTTTTAAAAAATATATTTCAAAAAATTTTAGATTAAATCT    |        |        |        |        |        |               |
| Candidatus Carsonella 135557 - 167442nt              | (1)      | -----                                                                          |        |        |        |        |        |               |
| SARS-CoV-2 Reference Genome NC_045512.2              | (1)      | -----                                                                          |        |        |        |        |        |               |
|                                                      |          | Section 1643                                                                   |        |        |        |        |        |               |
|                                                      | (126435) | 126435                                                                         | 126445 | 126456 | 126467 | 126478 | 126489 | 126500 126511 |
| Candidatus Carsonella ruddii strain BT chromosome... | (126435) | TCTATTTTAACTAAAATAAAATATAGTAAACATAATTATTATTCAAAAATAATAAAAAATTTAAAAATAATAAATAT  |        |        |        |        |        |               |
| Candidatus Carsonella 135557 - 167442nt              | (1)      | -----                                                                          |        |        |        |        |        |               |
| SARS-CoV-2 Reference Genome NC_045512.2              | (1)      | -----                                                                          |        |        |        |        |        |               |
|                                                      |          | Section 1644                                                                   |        |        |        |        |        |               |
|                                                      | (126512) | 126512                                                                         | 126522 | 126533 | 126544 | 126555 | 126566 | 126577 126588 |
| Candidatus Carsonella ruddii strain BT chromosome... | (126512) | TATACCAATTAATTATATTTTTTACATAAAAAAATAAATTTTTATTATGATAAATAATATTTCTACATTAAGTTCA   |        |        |        |        |        |               |
| Candidatus Carsonella 135557 - 167442nt              | (1)      | -----                                                                          |        |        |        |        |        |               |
| SARS-CoV-2 Reference Genome NC_045512.2              | (1)      | -----                                                                          |        |        |        |        |        |               |

## SARS-CoV-2 &amp; Bakterien.apr

|                                                      |          |                                                                                  |        |        |        |        |        |               |
|------------------------------------------------------|----------|----------------------------------------------------------------------------------|--------|--------|--------|--------|--------|---------------|
| Section 1645                                         |          |                                                                                  |        |        |        |        |        |               |
| Candidatus Carsonella ruddii strain BT chromosome... | (126589) | 126589                                                                           | 126599 | 126610 | 126621 | 126632 | 126643 | 126654 126665 |
| Candidatus Carsonella 135557 - 167442nt              | (126589) | GAATTTATTATAATAAACTTTATATTTAGTAATTTAAAAATTATCAAAAAATGTATTTGATATTTTAAAAGAAAATGA   |        |        |        |        |        |               |
| SARS-CoV-2 Reference Genome NC_045512.2              | (1)      | -----                                                                            |        |        |        |        |        |               |
| Section 1646                                         |          |                                                                                  |        |        |        |        |        |               |
| Candidatus Carsonella ruddii strain BT chromosome... | (126666) | 126666                                                                           | 126676 | 126687 | 126698 | 126709 | 126720 | 126731 126742 |
| Candidatus Carsonella 135557 - 167442nt              | (126666) | TTTTTTTTTATGAAACAACATAAAGAATATTTTTTAAAAAAAAAATTTATTTTATAAAATAAAATTTATTGATGAAAAAA |        |        |        |        |        |               |
| SARS-CoV-2 Reference Genome NC_045512.2              | (1)      | -----                                                                            |        |        |        |        |        |               |
| Section 1647                                         |          |                                                                                  |        |        |        |        |        |               |
| Candidatus Carsonella ruddii strain BT chromosome... | (126743) | 126743                                                                           | 126753 | 126764 | 126775 | 126786 | 126797 | 126808 126819 |
| Candidatus Carsonella 135557 - 167442nt              | (126743) | TTATTTTTTCTAATTTAAAAAATTTATTAGAAAAATCTAAAAAAGAAAAATGTTAAAAATTTTATTTAATATTTCT     |        |        |        |        |        |               |
| SARS-CoV-2 Reference Genome NC_045512.2              | (1)      | -----                                                                            |        |        |        |        |        |               |
| Section 1648                                         |          |                                                                                  |        |        |        |        |        |               |
| Candidatus Carsonella ruddii strain BT chromosome... | (126820) | 126820                                                                           | 126830 | 126841 | 126852 | 126863 | 126874 | 126885 126896 |
| Candidatus Carsonella 135557 - 167442nt              | (126820) | TTTGAATTGATTTTTTAATGAACATATAGATGAAAAAATTTTGAAAAAATTAATTTTTTACAAAATTTTAAAAA       |        |        |        |        |        |               |
| SARS-CoV-2 Reference Genome NC_045512.2              | (1)      | -----                                                                            |        |        |        |        |        |               |
| Section 1649                                         |          |                                                                                  |        |        |        |        |        |               |
| Candidatus Carsonella ruddii strain BT chromosome... | (126897) | 126897                                                                           | 126907 | 126918 | 126929 | 126940 | 126951 | 126962 126973 |
| Candidatus Carsonella 135557 - 167442nt              | (126897) | TAATCTTTTTGTTAAAAAATAAATTATGTAAATTTATTTAAAGAAATATTTTTTCAAAAAAAGAAATTAATTTTATTTA  |        |        |        |        |        |               |
| SARS-CoV-2 Reference Genome NC_045512.2              | (1)      | -----                                                                            |        |        |        |        |        |               |
| Section 1650                                         |          |                                                                                  |        |        |        |        |        |               |
| Candidatus Carsonella ruddii strain BT chromosome... | (126974) | 126974                                                                           | 126984 | 126995 | 127006 | 127017 | 127028 | 127039 127050 |
| Candidatus Carsonella 135557 - 167442nt              | (126974) | CTGGTTATAAAATTTTGATATTTTATTAAATGGATTACAAAAAGGAAATTTAATTGTATTGGCAGGAAGACCTTCT     |        |        |        |        |        |               |
| SARS-CoV-2 Reference Genome NC_045512.2              | (1)      | -----                                                                            |        |        |        |        |        |               |

|                                                      |          |                                                                                 |        |        |        |        |        |               |
|------------------------------------------------------|----------|---------------------------------------------------------------------------------|--------|--------|--------|--------|--------|---------------|
|                                                      |          | Section 1651                                                                    |        |        |        |        |        |               |
|                                                      | (127051) | 127051                                                                          | 127061 | 127072 | 127083 | 127094 | 127105 | 127116 127127 |
| Candidatus Carsonella ruddii strain BT chromosome... | (127051) | ATAGGTAAAACCTCATTTTCTTTAAATATAATAAAAAATTTAATTTTATTAAATAAAAAATAATAATTTTTCATT     |        |        |        |        |        |               |
| Candidatus Carsonella 135557 - 167442nt              | (1)      | -----                                                                           |        |        |        |        |        |               |
| SARS-CoV-2 Reference Genome NC_045512.2              | (1)      | -----                                                                           |        |        |        |        |        |               |
|                                                      |          | Section 1652                                                                    |        |        |        |        |        |               |
|                                                      | (127128) | 127128                                                                          | 127138 | 127149 | 127160 | 127171 | 127182 | 127193 127204 |
| Candidatus Carsonella ruddii strain BT chromosome... | (127128) | AGAAATGACGACTATACAAATTTATATTAGATTAATGTCTATTATATTAGAAATTAATCAAAATAACTTTATTAAAA   |        |        |        |        |        |               |
| Candidatus Carsonella 135557 - 167442nt              | (1)      | -----                                                                           |        |        |        |        |        |               |
| SARS-CoV-2 Reference Genome NC_045512.2              | (1)      | -----                                                                           |        |        |        |        |        |               |
|                                                      |          | Section 1653                                                                    |        |        |        |        |        |               |
|                                                      | (127205) | 127205                                                                          | 127215 | 127226 | 127237 | 127248 | 127259 | 127270 127281 |
| Candidatus Carsonella ruddii strain BT chromosome... | (127205) | ATAATTTTAATAAAAAATGATATGAAAAAATTTTCATTTTTTATAAAAAATATAAATTTTGATTCTTTAATAATAAAAA |        |        |        |        |        |               |
| Candidatus Carsonella 135557 - 167442nt              | (1)      | -----                                                                           |        |        |        |        |        |               |
| SARS-CoV-2 Reference Genome NC_045512.2              | (1)      | -----                                                                           |        |        |        |        |        |               |
|                                                      |          | Section 1654                                                                    |        |        |        |        |        |               |
|                                                      | (127282) | 127282                                                                          | 127292 | 127303 | 127314 | 127325 | 127336 | 127347 127358 |
| Candidatus Carsonella ruddii strain BT chromosome... | (127282) | GATTGTTCTAATTTATCTTCAAATGATATAGAATCTCAATTAGAGTATTATAAAAAAATAATATAAATATAGAAAT    |        |        |        |        |        |               |
| Candidatus Carsonella 135557 - 167442nt              | (1)      | -----                                                                           |        |        |        |        |        |               |
| SARS-CoV-2 Reference Genome NC_045512.2              | (1)      | -----                                                                           |        |        |        |        |        |               |
|                                                      |          | Section 1655                                                                    |        |        |        |        |        |               |
|                                                      | (127359) | 127359                                                                          | 127369 | 127380 | 127391 | 127402 | 127413 | 127424 127435 |
| Candidatus Carsonella ruddii strain BT chromosome... | (127359) | AATAGTTATAGATTATATTCAATTAATGAAATCTGAATTTTATTCAAATAATAGAGTATTGGAAATTTCTGATATAT   |        |        |        |        |        |               |
| Candidatus Carsonella 135557 - 167442nt              | (1)      | -----                                                                           |        |        |        |        |        |               |
| SARS-CoV-2 Reference Genome NC_045512.2              | (1)      | -----                                                                           |        |        |        |        |        |               |
|                                                      |          | Section 1656                                                                    |        |        |        |        |        |               |
|                                                      | (127436) | 127436                                                                          | 127446 | 127457 | 127468 | 127479 | 127490 | 127501 127512 |
| Candidatus Carsonella ruddii strain BT chromosome... | (127436) | CTAGATCATTTAAATTAATAGCTAAACATTTTAATTGTGTAGTAATTGCTTTATCTCAATTAATAGATTAATAGAA    |        |        |        |        |        |               |
| Candidatus Carsonella 135557 - 167442nt              | (1)      | -----                                                                           |        |        |        |        |        |               |
| SARS-CoV-2 Reference Genome NC_045512.2              | (1)      | -----                                                                           |        |        |        |        |        |               |

|                                                      |          |                                                                                 |        |        |        |        |        |              |        |
|------------------------------------------------------|----------|---------------------------------------------------------------------------------|--------|--------|--------|--------|--------|--------------|--------|
|                                                      |          |                                                                                 |        |        |        |        |        | Section 1657 |        |
|                                                      | (127513) | 127513                                                                          | 127523 | 127534 | 127545 | 127556 | 127567 | 127578       | 127589 |
| Candidatus Carsonella ruddii strain BT chromosome... | (127513) | TATAGAGTTGAAAAAATTCCTATGCTTTTCAGATTTAAGAGATTCAGGATCAATAGAGCAAGATGCTGATATAGTTAT  |        |        |        |        |        |              |        |
| Candidatus Carsonella 135557 - 167442nt              | (1)      | -----                                                                           |        |        |        |        |        |              |        |
| SARS-CoV-2 Reference Genome NC_045512.2              | (1)      | -----                                                                           |        |        |        |        |        |              |        |
|                                                      |          |                                                                                 |        |        |        |        |        | Section 1658 |        |
|                                                      | (127590) | 127590                                                                          | 127600 | 127611 | 127622 | 127633 | 127644 | 127655       | 127666 |
| Candidatus Carsonella ruddii strain BT chromosome... | (127590) | AATTTTACATAAAAAAATTTTAATTTTATAGATGTTTTAATTCTTAAAAATAGAAATGGTCCTTTAGGTGTTATTA    |        |        |        |        |        |              |        |
| Candidatus Carsonella 135557 - 167442nt              | (1)      | -----                                                                           |        |        |        |        |        |              |        |
| SARS-CoV-2 Reference Genome NC_045512.2              | (1)      | -----                                                                           |        |        |        |        |        |              |        |
|                                                      |          |                                                                                 |        |        |        |        |        | Section 1659 |        |
|                                                      | (127667) | 127667                                                                          | 127677 | 127688 | 127699 | 127710 | 127721 | 127732       | 127743 |
| Candidatus Carsonella ruddii strain BT chromosome... | (127667) | ATTTTATTTTAAAAATGAATATACAAAATTTATACAAATTTAAAAAATTTGGACAAAATTATTTAATTTTTAA       |        |        |        |        |        |              |        |
| Candidatus Carsonella 135557 - 167442nt              | (1)      | -----                                                                           |        |        |        |        |        |              |        |
| SARS-CoV-2 Reference Genome NC_045512.2              | (1)      | -----                                                                           |        |        |        |        |        |              |        |
|                                                      |          |                                                                                 |        |        |        |        |        | Section 1660 |        |
|                                                      | (127744) | 127744                                                                          | 127754 | 127765 | 127776 | 127787 | 127798 | 127809       | 127820 |
| Candidatus Carsonella ruddii strain BT chromosome... | (127744) | TTTAAATTTTAAATTTGATTTATGTTTCAGGTTATAATTATTTTAAATATTTTAAATAATGAATTAGATTTTTTAAAAA |        |        |        |        |        |              |        |
| Candidatus Carsonella 135557 - 167442nt              | (1)      | -----                                                                           |        |        |        |        |        |              |        |
| SARS-CoV-2 Reference Genome NC_045512.2              | (1)      | -----                                                                           |        |        |        |        |        |              |        |
|                                                      |          |                                                                                 |        |        |        |        |        | Section 1661 |        |
|                                                      | (127821) | 127821                                                                          | 127831 | 127842 | 127853 | 127864 | 127875 | 127886       | 127897 |
| Candidatus Carsonella ruddii strain BT chromosome... | (127821) | GCAAGTTTTTAAATAATAAAATTTATTTATTTAAAAAATAAAAAATTTATATTTAAATTTTTTATATTTTAAATTTTAA |        |        |        |        |        |              |        |
| Candidatus Carsonella 135557 - 167442nt              | (1)      | -----                                                                           |        |        |        |        |        |              |        |
| SARS-CoV-2 Reference Genome NC_045512.2              | (1)      | -----                                                                           |        |        |        |        |        |              |        |
|                                                      |          |                                                                                 |        |        |        |        |        | Section 1662 |        |
|                                                      | (127898) | 127898                                                                          | 127908 | 127919 | 127930 | 127941 | 127952 | 127963       | 127974 |
| Candidatus Carsonella ruddii strain BT chromosome... | (127898) | ATTTTAAATTAATAAATATAAATTTACCTTTTAAATATTATAAAAAATTTTTTTAAAAAATAAAAAAATAAAAAAG    |        |        |        |        |        |              |        |
| Candidatus Carsonella 135557 - 167442nt              | (1)      | -----                                                                           |        |        |        |        |        |              |        |
| SARS-CoV-2 Reference Genome NC_045512.2              | (1)      | -----                                                                           |        |        |        |        |        |              |        |

## SARS-CoV-2 &amp; Bakterien.apr

|                                                      |          |                                                                                    |        |        |        |        |        |               |
|------------------------------------------------------|----------|------------------------------------------------------------------------------------|--------|--------|--------|--------|--------|---------------|
|                                                      |          | Section 1663                                                                       |        |        |        |        |        |               |
|                                                      | (127975) | 127975                                                                             | 127985 | 127996 | 128007 | 128018 | 128029 | 128040 128051 |
| Candidatus Carsonella ruddii strain BT chromosome... | (127975) | ATTTTTTTTTTAAAATAATTGTTAATTTTATAAATTTTAAATTTTAAAAAAAAAATATTAATTTTAAAAAAAAAAT       |        |        |        |        |        |               |
| Candidatus Carsonella 135557 - 167442nt              | (1)      | -----                                                                              |        |        |        |        |        |               |
| SARS-CoV-2 Reference Genome NC_045512.2              | (1)      | -----                                                                              |        |        |        |        |        |               |
|                                                      |          | Section 1664                                                                       |        |        |        |        |        |               |
|                                                      | (128052) | 128052                                                                             | 128062 | 128073 | 128084 | 128095 | 128106 | 128117 128128 |
| Candidatus Carsonella ruddii strain BT chromosome... | (128052) | TTTTTTTAAAAAAAAATTTTTTCCCTTATCCTAAAAATTAATATAATAAAAAATTTATTTTAAAAAAAAAAAAAAAAATAAA |        |        |        |        |        |               |
| Candidatus Carsonella 135557 - 167442nt              | (1)      | -----                                                                              |        |        |        |        |        |               |
| SARS-CoV-2 Reference Genome NC_045512.2              | (1)      | -----                                                                              |        |        |        |        |        |               |
|                                                      |          | Section 1665                                                                       |        |        |        |        |        |               |
|                                                      | (128129) | 128129                                                                             | 128139 | 128150 | 128161 | 128172 | 128183 | 128194 128205 |
| Candidatus Carsonella ruddii strain BT chromosome... | (128129) | AGTATTAATTTTTTTTTTAAATATTATTAAATTAAAAACAAAATAAATCAGAAATAACAAAGTTTTTGTAAAAAAAT      |        |        |        |        |        |               |
| Candidatus Carsonella 135557 - 167442nt              | (1)      | -----                                                                              |        |        |        |        |        |               |
| SARS-CoV-2 Reference Genome NC_045512.2              | (1)      | -----                                                                              |        |        |        |        |        |               |
|                                                      |          | Section 1666                                                                       |        |        |        |        |        |               |
|                                                      | (128206) | 128206                                                                             | 128216 | 128227 | 128238 | 128249 | 128260 | 128271 128282 |
| Candidatus Carsonella ruddii strain BT chromosome... | (128206) | AATTTTAATAATTAAAAAAATGTTTTTTTCTATTAGATTTAAAAAAGAAAAATTTTGATTTTTTTTTAAAAAGATTT      |        |        |        |        |        |               |
| Candidatus Carsonella 135557 - 167442nt              | (1)      | -----                                                                              |        |        |        |        |        |               |
| SARS-CoV-2 Reference Genome NC_045512.2              | (1)      | -----                                                                              |        |        |        |        |        |               |
|                                                      |          | Section 1667                                                                       |        |        |        |        |        |               |
|                                                      | (128283) | 128283                                                                             | 128293 | 128304 | 128315 | 128326 | 128337 | 128348 128359 |
| Candidatus Carsonella ruddii strain BT chromosome... | (128283) | AAAAAAATATTGAAAAACAAAATAAAATTTGTAAAAAAGAAAAAAAAAAAAATTTTAAATAAAATAAAAAATGAAT       |        |        |        |        |        |               |
| Candidatus Carsonella 135557 - 167442nt              | (1)      | -----                                                                              |        |        |        |        |        |               |
| SARS-CoV-2 Reference Genome NC_045512.2              | (1)      | -----                                                                              |        |        |        |        |        |               |
|                                                      |          | Section 1668                                                                       |        |        |        |        |        |               |
|                                                      | (128360) | 128360                                                                             | 128370 | 128381 | 128392 | 128403 | 128414 | 128425 128436 |
| Candidatus Carsonella ruddii strain BT chromosome... | (128360) | TTAAAATGTCCATTTTCACAATGATAATAATGCATCTTTTTCTATAAGAAAAAATAAATTTATTTGTTATGGATGTAA     |        |        |        |        |        |               |
| Candidatus Carsonella 135557 - 167442nt              | (1)      | -----                                                                              |        |        |        |        |        |               |
| SARS-CoV-2 Reference Genome NC_045512.2              | (1)      | -----                                                                              |        |        |        |        |        |               |

|                                                      |          |                                                                                |        |        |        |        |        |               |
|------------------------------------------------------|----------|--------------------------------------------------------------------------------|--------|--------|--------|--------|--------|---------------|
| Section 1669                                         |          |                                                                                |        |        |        |        |        |               |
| Candidatus Carsonella ruddii strain BT chromosome... | (128437) | 128437                                                                         | 128447 | 128458 | 128469 | 128480 | 128491 | 128502 128513 |
| Candidatus Carsonella 135557 - 167442nt              | (128437) | TTTATATGGTTTTGTTAAAAATTCATTTAAAAATTAAAAAATTTGATTGTTTTTTTAATAAAAAAATTATATTATATT |        |        |        |        |        |               |
| SARS-CoV-2 Reference Genome NC_045512.2              | (1)      | -----                                                                          |        |        |        |        |        |               |
| Section 1670                                         |          |                                                                                |        |        |        |        |        |               |
| Candidatus Carsonella ruddii strain BT chromosome... | (128514) | 128514                                                                         | 128524 | 128535 | 128546 | 128557 | 128568 | 128579 128590 |
| Candidatus Carsonella 135557 - 167442nt              | (128514) | CAAAAAGAAATTTATATATTAAAAAAATTTTGGTTAAAAATTTTATTATTAAAGAAATATAAATATGAATACATCA   |        |        |        |        |        |               |
| SARS-CoV-2 Reference Genome NC_045512.2              | (1)      | -----                                                                          |        |        |        |        |        |               |
| Section 1671                                         |          |                                                                                |        |        |        |        |        |               |
| Candidatus Carsonella ruddii strain BT chromosome... | (128591) | 128591                                                                         | 128601 | 128612 | 128623 | 128634 | 128645 | 128656 128667 |
| Candidatus Carsonella 135557 - 167442nt              | (128591) | TTAAAATTTAATTTAGGTGTATTAAATTTTACTCAAAAAAAGTAAATAACATTATTTTAAATAGATTAAATTTTTC   |        |        |        |        |        |               |
| SARS-CoV-2 Reference Genome NC_045512.2              | (1)      | -----                                                                          |        |        |        |        |        |               |
| Section 1672                                         |          |                                                                                |        |        |        |        |        |               |
| Candidatus Carsonella ruddii strain BT chromosome... | (128668) | 128668                                                                         | 128678 | 128689 | 128700 | 128711 | 128722 | 128733 128744 |
| Candidatus Carsonella 135557 - 167442nt              | (128668) | AATACTAAATGATAAAAAATATATTGTTAGGTATAGGTTTAAAAACAAACAATAAAAAAAATAAATATATAAATTTAT |        |        |        |        |        |               |
| SARS-CoV-2 Reference Genome NC_045512.2              | (1)      | -----                                                                          |        |        |        |        |        |               |
| Section 1673                                         |          |                                                                                |        |        |        |        |        |               |
| Candidatus Carsonella ruddii strain BT chromosome... | (128745) | 128745                                                                         | 128755 | 128766 | 128777 | 128788 | 128799 | 128810 128821 |
| Candidatus Carsonella 135557 - 167442nt              | (128745) | TAAAAACAACATTAATGAAAATGTTTTTTTTGGTTATTAATAATATAAAAAATTTTAATTTTATAATTGTAGTAGAA  |        |        |        |        |        |               |
| SARS-CoV-2 Reference Genome NC_045512.2              | (1)      | -----                                                                          |        |        |        |        |        |               |
| Section 1674                                         |          |                                                                                |        |        |        |        |        |               |
| Candidatus Carsonella ruddii strain BT chromosome... | (128822) | 128822                                                                         | 128832 | 128843 | 128854 | 128865 | 128876 | 128887 128898 |
| Candidatus Carsonella 135557 - 167442nt              | (128822) | GGTTACTTTGATTTATTAAGTATTTATAAAAAATAATTTTTTAAATGTAATTTCTATATTAGGTTGTAATATTAATTA |        |        |        |        |        |               |
| SARS-CoV-2 Reference Genome NC_045512.2              | (1)      | -----                                                                          |        |        |        |        |        |               |

|                                                      |          |                                                                               |        |        |        |        |        |               |
|------------------------------------------------------|----------|-------------------------------------------------------------------------------|--------|--------|--------|--------|--------|---------------|
|                                                      |          | Section 1675                                                                  |        |        |        |        |        |               |
|                                                      | (128899) | 128899                                                                        | 128909 | 128920 | 128931 | 128942 | 128953 | 128964 128975 |
| Candidatus Carsonella ruddii strain BT chromosome... | (128899) | TGAAAAAATAAATTTTTTATTGTTTAAATTTAAAAAAATTTATTTTGTGTTAGATGGAGATTATTCTGGTTATAATT |        |        |        |        |        |               |
| Candidatus Carsonella 135557 - 167442nt              | (1)      | -----                                                                         |        |        |        |        |        |               |
| SARS-CoV-2 Reference Genome NC_045512.2              | (1)      | -----                                                                         |        |        |        |        |        |               |
|                                                      |          | Section 1676                                                                  |        |        |        |        |        |               |
|                                                      | (128976) | 128976                                                                        | 128986 | 128997 | 129008 | 129019 | 129030 | 129041 129052 |
| Candidatus Carsonella ruddii strain BT chromosome... | (128976) | CTTCTGAAAAAATTAAAAAATATTTAAAAATTATTATAAAAAAAGAATTTTATTAAAAATATGCCATTTAATTTT   |        |        |        |        |        |               |
| Candidatus Carsonella 135557 - 167442nt              | (1)      | -----                                                                         |        |        |        |        |        |               |
| SARS-CoV-2 Reference Genome NC_045512.2              | (1)      | -----                                                                         |        |        |        |        |        |               |
|                                                      |          | Section 1677                                                                  |        |        |        |        |        |               |
|                                                      | (129053) | 129053                                                                        | 129063 | 129074 | 129085 | 129096 | 129107 | 129118 129129 |
| Candidatus Carsonella ruddii strain BT chromosome... | (129053) | GATCCTGATAGTTTTATAAATTTTTATGGAATTAAATCTTTTTTAAATTTTAAATAAAATGAATATATTTTTTTTA  |        |        |        |        |        |               |
| Candidatus Carsonella 135557 - 167442nt              | (1)      | -----                                                                         |        |        |        |        |        |               |
| SARS-CoV-2 Reference Genome NC_045512.2              | (1)      | -----                                                                         |        |        |        |        |        |               |
|                                                      |          | Section 1678                                                                  |        |        |        |        |        |               |
|                                                      | (129130) | 129130                                                                        | 129140 | 129151 | 129162 | 129173 | 129184 | 129195 129206 |
| Candidatus Carsonella ruddii strain BT chromosome... | (129130) | TTTTTAAACAAAAATTTGTTTCCTTTTTTAAAAATTATAAAAAAATTTTATATTTTTTAAAAACAAAAATAAA     |        |        |        |        |        |               |
| Candidatus Carsonella 135557 - 167442nt              | (1)      | -----                                                                         |        |        |        |        |        |               |
| SARS-CoV-2 Reference Genome NC_045512.2              | (1)      | -----                                                                         |        |        |        |        |        |               |
|                                                      |          | Section 1679                                                                  |        |        |        |        |        |               |
|                                                      | (129207) | 129207                                                                        | 129217 | 129228 | 129239 | 129250 | 129261 | 129272 129283 |
| Candidatus Carsonella ruddii strain BT chromosome... | (129207) | AAAAAAATTAATATTAAAAATAATTTTTTTTTTTTTTTTAAAAAAATAAATAAAAAAATTTATTTAAAAA        |        |        |        |        |        |               |
| Candidatus Carsonella 135557 - 167442nt              | (1)      | -----                                                                         |        |        |        |        |        |               |
| SARS-CoV-2 Reference Genome NC_045512.2              | (1)      | -----                                                                         |        |        |        |        |        |               |
|                                                      |          | Section 1680                                                                  |        |        |        |        |        |               |
|                                                      | (129284) | 129284                                                                        | 129294 | 129305 | 129316 | 129327 | 129338 | 129349 129360 |
| Candidatus Carsonella ruddii strain BT chromosome... | (129284) | TAATTATTATTAAATTTAATAAATCTTTTTTTTTTAAATATTTATTTAATCAAAAATTTATTTTGAAAATTTTTTTT |        |        |        |        |        |               |
| Candidatus Carsonella 135557 - 167442nt              | (1)      | -----                                                                         |        |        |        |        |        |               |
| SARS-CoV-2 Reference Genome NC_045512.2              | (1)      | -----                                                                         |        |        |        |        |        |               |



|                                                      |          |                                                                                 |        |        |        |        |        |               |
|------------------------------------------------------|----------|---------------------------------------------------------------------------------|--------|--------|--------|--------|--------|---------------|
|                                                      |          | Section 1681                                                                    |        |        |        |        |        |               |
|                                                      | (129361) | 129361                                                                          | 129371 | 129382 | 129393 | 129404 | 129415 | 129426 129437 |
| Candidatus Carsonella ruddii strain BT chromosome... | (129361) | TATTTTCGATTTTTTTTTTACAAAAAAAAAATTTTATAAAAAAAAAATTTTAATTTTATAAAAAAAAAAATTAAATAAA |        |        |        |        |        |               |
| Candidatus Carsonella 135557 - 167442nt              | (1)      | -----                                                                           |        |        |        |        |        |               |
| SARS-CoV-2 Reference Genome NC_045512.2              | (1)      | -----                                                                           |        |        |        |        |        |               |
|                                                      |          | Section 1682                                                                    |        |        |        |        |        |               |
|                                                      | (129438) | 129438                                                                          | 129448 | 129459 | 129470 | 129481 | 129492 | 129503 129514 |
| Candidatus Carsonella ruddii strain BT chromosome... | (129438) | AAATTTTTTAAATCATATTGAAAATAAAATTTCTATATAAATAAAAAATTTAATATTAATTAATAAATAAAAAATA    |        |        |        |        |        |               |
| Candidatus Carsonella 135557 - 167442nt              | (1)      | -----                                                                           |        |        |        |        |        |               |
| SARS-CoV-2 Reference Genome NC_045512.2              | (1)      | -----                                                                           |        |        |        |        |        |               |
|                                                      |          | Section 1683                                                                    |        |        |        |        |        |               |
|                                                      | (129515) | 129515                                                                          | 129525 | 129536 | 129547 | 129558 | 129569 | 129580 129591 |
| Candidatus Carsonella ruddii strain BT chromosome... | (129515) | ATATAGAACAATTAATAAACATAAATTTAATTAAAAACAATTATTTATCTTTCATTTATAAAAAAAAAAATAAATGAA  |        |        |        |        |        |               |
| Candidatus Carsonella 135557 - 167442nt              | (1)      | -----                                                                           |        |        |        |        |        |               |
| SARS-CoV-2 Reference Genome NC_045512.2              | (1)      | -----                                                                           |        |        |        |        |        |               |
|                                                      |          | Section 1684                                                                    |        |        |        |        |        |               |
|                                                      | (129592) | 129592                                                                          | 129602 | 129613 | 129624 | 129635 | 129646 | 129657 129668 |
| Candidatus Carsonella ruddii strain BT chromosome... | (129592) | AATATTTTAAAAAATAATATAAAAAATTTTAAAAAAATTTTAAAAAAATATAAAAAATAAACAAATTTACAATGATTT  |        |        |        |        |        |               |
| Candidatus Carsonella 135557 - 167442nt              | (1)      | -----                                                                           |        |        |        |        |        |               |
| SARS-CoV-2 Reference Genome NC_045512.2              | (1)      | -----                                                                           |        |        |        |        |        |               |
|                                                      |          | Section 1685                                                                    |        |        |        |        |        |               |
|                                                      | (129669) | 129669                                                                          | 129679 | 129690 | 129701 | 129712 | 129723 | 129734 129745 |
| Candidatus Carsonella ruddii strain BT chromosome... | (129669) | ATATCAAGAATGTTATTATGAATTTAAAAATGTAATTTTGTATAATAATTATTGTAATAATAATTTTATAAATTTT    |        |        |        |        |        |               |
| Candidatus Carsonella 135557 - 167442nt              | (1)      | -----                                                                           |        |        |        |        |        |               |
| SARS-CoV-2 Reference Genome NC_045512.2              | (1)      | -----                                                                           |        |        |        |        |        |               |
|                                                      |          | Section 1686                                                                    |        |        |        |        |        |               |
|                                                      | (129746) | 129746                                                                          | 129756 | 129767 | 129778 | 129789 | 129800 | 129811 129822 |
| Candidatus Carsonella ruddii strain BT chromosome... | (129746) | GTTATTGGAATATTAAAAAAATGATAAGCATAATAAATTTTAAAAAAATAATTTTAAAAATCAAATTTTATCA       |        |        |        |        |        |               |
| Candidatus Carsonella 135557 - 167442nt              | (1)      | -----                                                                           |        |        |        |        |        |               |
| SARS-CoV-2 Reference Genome NC_045512.2              | (1)      | -----                                                                           |        |        |        |        |        |               |

|                                                      |          |                                                                              |        |        |        |        |        |               |
|------------------------------------------------------|----------|------------------------------------------------------------------------------|--------|--------|--------|--------|--------|---------------|
|                                                      |          | Section 1687                                                                 |        |        |        |        |        |               |
|                                                      | (129823) | 129823                                                                       | 129833 | 129844 | 129855 | 129866 | 129877 | 129888 129899 |
| Candidatus Carsonella ruddii strain BT chromosome... | (129823) | ATTGATAAACCTTTATTTTATCATTCTTTAAATATTTTATATCAGAAAATGATAGATCGTTTCTTTAGAAATATAC |        |        |        |        |        |               |
| Candidatus Carsonella 135557 - 167442nt              | (1)      | -----                                                                        |        |        |        |        |        |               |
| SARS-CoV-2 Reference Genome NC_045512.2              | (1)      | -----                                                                        |        |        |        |        |        |               |
|                                                      |          | Section 1688                                                                 |        |        |        |        |        |               |
|                                                      | (129900) | 129900                                                                       | 129910 | 129921 | 129932 | 129943 | 129954 | 129965 129976 |
| Candidatus Carsonella ruddii strain BT chromosome... | (129900) | AAGAAATTCTTTAAAAAATTTAATAAGAGAATTAATTTCTAGTTTACCTCAAAGAGAACAAAAATAATAAGATTAA |        |        |        |        |        |               |
| Candidatus Carsonella 135557 - 167442nt              | (1)      | -----                                                                        |        |        |        |        |        |               |
| SARS-CoV-2 Reference Genome NC_045512.2              | (1)      | -----                                                                        |        |        |        |        |        |               |
|                                                      |          | Section 1689                                                                 |        |        |        |        |        |               |
|                                                      | (129977) | 129977                                                                       | 129987 | 129998 | 130009 | 130020 | 130031 | 130042 130053 |
| Candidatus Carsonella ruddii strain BT chromosome... | (129977) | GATTTGGAATAGGTCACCAAAATATTATACTCTTGAAGAAATAGGAATTTTACATTATTTAACAAAAGAAAGAATA |        |        |        |        |        |               |
| Candidatus Carsonella 135557 - 167442nt              | (1)      | -----                                                                        |        |        |        |        |        |               |
| SARS-CoV-2 Reference Genome NC_045512.2              | (1)      | -----                                                                        |        |        |        |        |        |               |
|                                                      |          | Section 1690                                                                 |        |        |        |        |        |               |
|                                                      | (130054) | 130054                                                                       | 130064 | 130075 | 130086 | 130097 | 130108 | 130119 130130 |
| Candidatus Carsonella ruddii strain BT chromosome... | (130054) | AGACAAATTGAGTTAGCTATCATATTAAAAATAAGAAACCTTTAATAATTGAATTATTAAAACCTTATGTAAATTT |        |        |        |        |        |               |
| Candidatus Carsonella 135557 - 167442nt              | (1)      | -----                                                                        |        |        |        |        |        |               |
| SARS-CoV-2 Reference Genome NC_045512.2              | (1)      | -----                                                                        |        |        |        |        |        |               |
|                                                      |          | Section 1691                                                                 |        |        |        |        |        |               |
|                                                      | (130131) | 130131                                                                       | 130141 | 130152 | 130163 | 130174 | 130185 | 130196 130207 |
| Candidatus Carsonella ruddii strain BT chromosome... | (130131) | ATTTAAAGCTTTAGAATAATGGGGTTATAATTTAACTGGTAAATATTTGCTTTGCAAGCAAAAATAAAGGGTTCAA |        |        |        |        |        |               |
| Candidatus Carsonella 135557 - 167442nt              | (1)      | -----                                                                        |        |        |        |        |        |               |
| SARS-CoV-2 Reference Genome NC_045512.2              | (1)      | -----                                                                        |        |        |        |        |        |               |
|                                                      |          | Section 1692                                                                 |        |        |        |        |        |               |
|                                                      | (130208) | 130208                                                                       | 130218 | 130229 | 130240 | 130251 | 130262 | 130273 130284 |
| Candidatus Carsonella ruddii strain BT chromosome... | (130208) | TTCCCTTTAACTCCATTTTTTTAAATTATTTAAATTTATTTTAAATATTTTATATTTTGAACTGTTATTCTTAAAA |        |        |        |        |        |               |
| Candidatus Carsonella 135557 - 167442nt              | (1)      | -----                                                                        |        |        |        |        |        |               |
| SARS-CoV-2 Reference Genome NC_045512.2              | (1)      | -----                                                                        |        |        |        |        |        |               |

## SARS-CoV-2 &amp; Bakterien.apr

|                                                      |          |                                                                                |        |        |        |        |        |               |
|------------------------------------------------------|----------|--------------------------------------------------------------------------------|--------|--------|--------|--------|--------|---------------|
|                                                      |          | Section 1693                                                                   |        |        |        |        |        |               |
|                                                      | (130285) | 130285                                                                         | 130295 | 130306 | 130317 | 130328 | 130339 | 130350 130361 |
| Candidatus Carsonella ruddii strain BT chromosome... | (130285) | TGTTATTTTTTAAAATATCTAAAAAAAAAATTTTTTTTTTTAAAAAAATAAAAAATCTATTTTTTTTTTTAAACAA   |        |        |        |        |        |               |
| Candidatus Carsonella 135557 - 167442nt              | (1)      | -----                                                                          |        |        |        |        |        |               |
| SARS-CoV-2 Reference Genome NC_045512.2              | (1)      | -----                                                                          |        |        |        |        |        |               |
|                                                      |          | Section 1694                                                                   |        |        |        |        |        |               |
|                                                      | (130362) | 130362                                                                         | 130372 | 130383 | 130394 | 130405 | 130416 | 130427 130438 |
| Candidatus Carsonella ruddii strain BT chromosome... | (130362) | ATAAAATTTCTTTTTGTTTTTTTTTAAAAATAAAATAATAATTTAAATAATTGATTTTTTGTATATTTAA         |        |        |        |        |        |               |
| Candidatus Carsonella 135557 - 167442nt              | (1)      | -----                                                                          |        |        |        |        |        |               |
| SARS-CoV-2 Reference Genome NC_045512.2              | (1)      | -----                                                                          |        |        |        |        |        |               |
|                                                      |          | Section 1695                                                                   |        |        |        |        |        |               |
|                                                      | (130439) | 130439                                                                         | 130449 | 130460 | 130471 | 130482 | 130493 | 130504 130515 |
| Candidatus Carsonella ruddii strain BT chromosome... | (130439) | AAATAAAAAATGTTTATCTTTTAAACATTCAATAGATATAGAATTTGATACAATATCTATTGTATAAGAATTAAAC   |        |        |        |        |        |               |
| Candidatus Carsonella 135557 - 167442nt              | (1)      | -----                                                                          |        |        |        |        |        |               |
| SARS-CoV-2 Reference Genome NC_045512.2              | (1)      | -----                                                                          |        |        |        |        |        |               |
|                                                      |          | Section 1696                                                                   |        |        |        |        |        |               |
|                                                      | (130516) | 130516                                                                         | 130526 | 130537 | 130548 | 130559 | 130570 | 130581 130592 |
| Candidatus Carsonella ruddii strain BT chromosome... | (130516) | ATTGTTTTAAATATTTAATTTTATTAATTATTTTTTTATTTGAAAAATATTAATCCTATTCTTATTCCAGCAATACTA |        |        |        |        |        |               |
| Candidatus Carsonella 135557 - 167442nt              | (1)      | -----                                                                          |        |        |        |        |        |               |
| SARS-CoV-2 Reference Genome NC_045512.2              | (1)      | -----                                                                          |        |        |        |        |        |               |
|                                                      |          | Section 1697                                                                   |        |        |        |        |        |               |
|                                                      | (130593) | 130593                                                                         | 130603 | 130614 | 130625 | 130636 | 130647 | 130658 130669 |
| Candidatus Carsonella ruddii strain BT chromosome... | (130593) | AAAGCTTTAGATAATGTATTTATAATAATTAAATTATTTTAAATTTTAAATTTTTTTTTTAAACCTAAATTATAAAA  |        |        |        |        |        |               |
| Candidatus Carsonella 135557 - 167442nt              | (1)      | -----                                                                          |        |        |        |        |        |               |
| SARS-CoV-2 Reference Genome NC_045512.2              | (1)      | -----                                                                          |        |        |        |        |        |               |
|                                                      |          | Section 1698                                                                   |        |        |        |        |        |               |
|                                                      | (130670) | 130670                                                                         | 130680 | 130691 | 130702 | 130713 | 130724 | 130735 130746 |
| Candidatus Carsonella ruddii strain BT chromosome... | (130670) | TTCTGAATAAGCTTCATCTATAATTAAAAATTTTTTTTTTTATCTTTTTATTAAAAAAATTTTTAAAAAATT       |        |        |        |        |        |               |
| Candidatus Carsonella 135557 - 167442nt              | (1)      | -----                                                                          |        |        |        |        |        |               |
| SARS-CoV-2 Reference Genome NC_045512.2              | (1)      | -----                                                                          |        |        |        |        |        |               |

## SARS-CoV-2 &amp; Bakterien.apr

|                                                      |          |                                                                               |        |        |        |        |        |               |
|------------------------------------------------------|----------|-------------------------------------------------------------------------------|--------|--------|--------|--------|--------|---------------|
|                                                      |          | Section 1699                                                                  |        |        |        |        |        |               |
|                                                      | (130747) | 130747                                                                        | 130757 | 130768 | 130779 | 130790 | 130801 | 130812 130823 |
| Candidatus Carsonella ruddii strain BT chromosome... | (130747) | CACCAGAAGGTGAATTTGGGTTTGGAAAAATTATATTTTATATTTTAAAAATATTTTATATTTAACTTCTTTTGTG  |        |        |        |        |        |               |
| Candidatus Carsonella 135557 - 167442nt              | (1)      | -----                                                                         |        |        |        |        |        |               |
| SARS-CoV-2 Reference Genome NC_045512.2              | (1)      | -----                                                                         |        |        |        |        |        |               |
|                                                      |          | Section 1700                                                                  |        |        |        |        |        |               |
|                                                      | (130824) | 130824                                                                        | 130834 | 130845 | 130856 | 130867 | 130878 | 130889 130900 |
| Candidatus Carsonella ruddii strain BT chromosome... | (130824) | TATATTTTAAAAAATTAGAAATATATTTTATAAAAAAGGATAACTTTGTTTAGGAATTTTATTTTAAAAATTTTAAA |        |        |        |        |        |               |
| Candidatus Carsonella 135557 - 167442nt              | (1)      | -----                                                                         |        |        |        |        |        |               |
| SARS-CoV-2 Reference Genome NC_045512.2              | (1)      | -----                                                                         |        |        |        |        |        |               |
|                                                      |          | Section 1701                                                                  |        |        |        |        |        |               |
|                                                      | (130901) | 130901                                                                        | 130911 | 130922 | 130933 | 130944 | 130955 | 130966 130977 |
| Candidatus Carsonella ruddii strain BT chromosome... | (130901) | CAAAAAAATAAAAAAATAACCCCTTCATCTGAACCATTAGATATAAATATATTATTTTATTTAAATTATATATTT   |        |        |        |        |        |               |
| Candidatus Carsonella 135557 - 167442nt              | (1)      | -----                                                                         |        |        |        |        |        |               |
| SARS-CoV-2 Reference Genome NC_045512.2              | (1)      | -----                                                                         |        |        |        |        |        |               |
|                                                      |          | Section 1702                                                                  |        |        |        |        |        |               |
|                                                      | (130978) | 130978                                                                        | 130988 | 130999 | 131010 | 131021 | 131032 | 131043 131054 |
| Candidatus Carsonella ruddii strain BT chromosome... | (130978) | TACTAATAATTTTGTAAATGTAAATTTTCAGAATTTGGGTAAAAATTTAAATTTATTAAAAATTTTAGAAATAATT  |        |        |        |        |        |               |
| Candidatus Carsonella 135557 - 167442nt              | (1)      | -----                                                                         |        |        |        |        |        |               |
| SARS-CoV-2 Reference Genome NC_045512.2              | (1)      | -----                                                                         |        |        |        |        |        |               |
|                                                      |          | Section 1703                                                                  |        |        |        |        |        |               |
|                                                      | (131055) | 131055                                                                        | 131065 | 131076 | 131087 | 131098 | 131109 | 131120 131131 |
| Candidatus Carsonella ruddii strain BT chromosome... | (131055) | TTTAATAAAAAAAAACAGTTTTTACTTGAAGAATAAATATTTTCATTAGTATTTAATTTATAGCCTTTATAACACCT |        |        |        |        |        |               |
| Candidatus Carsonella 135557 - 167442nt              | (1)      | -----                                                                         |        |        |        |        |        |               |
| SARS-CoV-2 Reference Genome NC_045512.2              | (1)      | -----                                                                         |        |        |        |        |        |               |
|                                                      |          | Section 1704                                                                  |        |        |        |        |        |               |
|                                                      | (131132) | 131132                                                                        | 131142 | 131153 | 131164 | 131175 | 131186 | 131197 131208 |
| Candidatus Carsonella ruddii strain BT chromosome... | (131132) | TTCACCAGGTATATATTTTTTCATATTAATTTTATATATTTTTTAAAAATAATTAGGTACTAAATAATTAAATGAAA |        |        |        |        |        |               |
| Candidatus Carsonella 135557 - 167442nt              | (1)      | -----                                                                         |        |        |        |        |        |               |
| SARS-CoV-2 Reference Genome NC_045512.2              | (1)      | -----                                                                         |        |        |        |        |        |               |

|                                                      |          |                                                                                  |        |        |        |        |        |               |
|------------------------------------------------------|----------|----------------------------------------------------------------------------------|--------|--------|--------|--------|--------|---------------|
|                                                      |          | Section 1705                                                                     |        |        |        |        |        |               |
|                                                      | (131209) | 131209                                                                           | 131219 | 131230 | 131241 | 131252 | 131263 | 131274 131285 |
| Candidatus Carsonella ruddii strain BT chromosome... | (131209) | AACACTAGCAATTAAAAAACTATTAATATTACAATATTTATAAAATATAATAAATATCATTATACCTTCCTAAACCAC   |        |        |        |        |        |               |
| Candidatus Carsonella 135557 - 167442nt              | (1)      | -----                                                                            |        |        |        |        |        |               |
| SARS-CoV-2 Reference Genome NC_045512.2              | (1)      | -----                                                                            |        |        |        |        |        |               |
|                                                      |          | Section 1706                                                                     |        |        |        |        |        |               |
|                                                      | (131286) | 131286                                                                           | 131296 | 131307 | 131318 | 131329 | 131340 | 131351 131362 |
| Candidatus Carsonella ruddii strain BT chromosome... | (131286) | CAGATATAATTATAGAAATATCTATATTTTTTTTAAACATAAAATAATAGATTTAATATCATATCCTTTTTTTTAAACCA |        |        |        |        |        |               |
| Candidatus Carsonella 135557 - 167442nt              | (1)      | -----                                                                            |        |        |        |        |        |               |
| SARS-CoV-2 Reference Genome NC_045512.2              | (1)      | -----                                                                            |        |        |        |        |        |               |
|                                                      |          | Section 1707                                                                     |        |        |        |        |        |               |
|                                                      | (131363) | 131363                                                                           | 131373 | 131384 | 131395 | 131406 | 131417 | 131428 131439 |
| Candidatus Carsonella ruddii strain BT chromosome... | (131363) | TCATTTTCAATAGATGTAATTAATATTTCTCCACAACCTATTTTTTTAACTATTATAACCCAATCTAGTAATTTAAA    |        |        |        |        |        |               |
| Candidatus Carsonella 135557 - 167442nt              | (1)      | -----                                                                            |        |        |        |        |        |               |
| SARS-CoV-2 Reference Genome NC_045512.2              | (1)      | -----                                                                            |        |        |        |        |        |               |
|                                                      |          | Section 1708                                                                     |        |        |        |        |        |               |
|                                                      | (131440) | 131440                                                                           | 131450 | 131461 | 131472 | 131483 | 131494 | 131505 131516 |
| Candidatus Carsonella ruddii strain BT chromosome... | (131440) | ATTAGTTTTAATAAAAACCACCTGTTTTTATAAGTAAAAAAAAAATGTTTTTAAAAAATATATCAATAGAAACAATTA   |        |        |        |        |        |               |
| Candidatus Carsonella 135557 - 167442nt              | (1)      | -----                                                                            |        |        |        |        |        |               |
| SARS-CoV-2 Reference Genome NC_045512.2              | (1)      | -----                                                                            |        |        |        |        |        |               |
|                                                      |          | Section 1709                                                                     |        |        |        |        |        |               |
|                                                      | (131517) | 131517                                                                           | 131527 | 131538 | 131549 | 131560 | 131571 | 131582 131593 |
| Candidatus Carsonella ruddii strain BT chromosome... | (131517) | ATGCTTGAGATCCATATAAATTTGAAATCTTTTTTAAAAATACTATGTTATTATAACAAGAAGAATTTAAACAATT     |        |        |        |        |        |               |
| Candidatus Carsonella 135557 - 167442nt              | (1)      | -----                                                                            |        |        |        |        |        |               |
| SARS-CoV-2 Reference Genome NC_045512.2              | (1)      | -----                                                                            |        |        |        |        |        |               |
|                                                      |          | Section 1710                                                                     |        |        |        |        |        |               |
|                                                      | (131594) | 131594                                                                           | 131604 | 131615 | 131626 | 131637 | 131648 | 131659 131670 |
| Candidatus Carsonella ruddii strain BT chromosome... | (131594) | CTGTCAGCTCCTAATTTAAATAATTTAGAAATTTTATTTAAATTTTTTATACCTCCTCCAATAGAAATAGGAATATT    |        |        |        |        |        |               |
| Candidatus Carsonella 135557 - 167442nt              | (1)      | -----                                                                            |        |        |        |        |        |               |
| SARS-CoV-2 Reference Genome NC_045512.2              | (1)      | -----                                                                            |        |        |        |        |        |               |

|                                                      |          |                                                                               |        |        |        |        |        |               |
|------------------------------------------------------|----------|-------------------------------------------------------------------------------|--------|--------|--------|--------|--------|---------------|
|                                                      |          | Section 1711                                                                  |        |        |        |        |        |               |
|                                                      | (131671) | 131671                                                                        | 131681 | 131692 | 131703 | 131714 | 131725 | 131736 131747 |
| Candidatus Carsonella ruddii strain BT chromosome... | (131671) | AATATTTTATAGAAATTAATTTTATATTTTATAAGATAGACTTTTATAGTATAATTAGAAGTTATATCTAAATTA   |        |        |        |        |        |               |
| Candidatus Carsonella 135557 - 167442nt              | (1)      | -----                                                                         |        |        |        |        |        |               |
| SARS-CoV-2 Reference Genome NC_045512.2              | (1)      | -----                                                                         |        |        |        |        |        |               |
|                                                      |          | Section 1712                                                                  |        |        |        |        |        |               |
|                                                      | (131748) | 131748                                                                        | 131758 | 131769 | 131780 | 131791 | 131802 | 131813 131824 |
| Candidatus Carsonella ruddii strain BT chromosome... | (131748) | TAATTTTCATCAGTTTTATAAAATTCATATTTTACATAATAAATAAGGATAATTAATAATTTTAAATTTTAAAA    |        |        |        |        |        |               |
| Candidatus Carsonella 135557 - 167442nt              | (1)      | -----                                                                         |        |        |        |        |        |               |
| SARS-CoV-2 Reference Genome NC_045512.2              | (1)      | -----                                                                         |        |        |        |        |        |               |
|                                                      |          | Section 1713                                                                  |        |        |        |        |        |               |
|                                                      | (131825) | 131825                                                                        | 131835 | 131846 | 131857 | 131868 | 131879 | 131890 131901 |
| Candidatus Carsonella ruddii strain BT chromosome... | (131825) | CTTATACCTTTTACAACATAAATTATTTTAAATATCTAAACAACCTTATAATTCTAATCATAAATTTTATTTTAATA |        |        |        |        |        |               |
| Candidatus Carsonella 135557 - 167442nt              | (1)      | -----                                                                         |        |        |        |        |        |               |
| SARS-CoV-2 Reference Genome NC_045512.2              | (1)      | -----                                                                         |        |        |        |        |        |               |
|                                                      |          | Section 1714                                                                  |        |        |        |        |        |               |
|                                                      | (131902) | 131902                                                                        | 131912 | 131923 | 131934 | 131945 | 131956 | 131967 131978 |
| Candidatus Carsonella ruddii strain BT chromosome... | (131902) | CTAAATTTATATAAAGACAATCCTATTATAAATTTAAATTTGCATTTTATTAATTTTAAATATCATCTATATT     |        |        |        |        |        |               |
| Candidatus Carsonella 135557 - 167442nt              | (1)      | -----                                                                         |        |        |        |        |        |               |
| SARS-CoV-2 Reference Genome NC_045512.2              | (1)      | -----                                                                         |        |        |        |        |        |               |
|                                                      |          | Section 1715                                                                  |        |        |        |        |        |               |
|                                                      | (131979) | 131979                                                                        | 131989 | 132000 | 132011 | 132022 | 132033 | 132044 132055 |
| Candidatus Carsonella ruddii strain BT chromosome... | (131979) | TGATATACCTCCTGAGATAATAAAATTACATAAATTTTATTTAATATAAAACATAATTCTTCAATTTTATTC      |        |        |        |        |        |               |
| Candidatus Carsonella 135557 - 167442nt              | (1)      | -----                                                                         |        |        |        |        |        |               |
| SARS-CoV-2 Reference Genome NC_045512.2              | (1)      | -----                                                                         |        |        |        |        |        |               |
|                                                      |          | Section 1716                                                                  |        |        |        |        |        |               |
|                                                      | (132056) | 132056                                                                        | 132066 | 132077 | 132088 | 132099 | 132110 | 132121 132132 |
| Candidatus Carsonella ruddii strain BT chromosome... | (132056) | CAGACAAAGTACCATCTTTAATTATATTAGTGTATATTATTTTAAATATTTATATCAAATAAATATATAAAATTT   |        |        |        |        |        |               |
| Candidatus Carsonella 135557 - 167442nt              | (1)      | -----                                                                         |        |        |        |        |        |               |
| SARS-CoV-2 Reference Genome NC_045512.2              | (1)      | -----                                                                         |        |        |        |        |        |               |

## SARS-CoV-2 &amp; Bakterien.apr

|                                                      |          |                                                                                 |        |        |        |        |        |               |
|------------------------------------------------------|----------|---------------------------------------------------------------------------------|--------|--------|--------|--------|--------|---------------|
|                                                      |          | Section 1717                                                                    |        |        |        |        |        |               |
|                                                      | (132133) | 132133                                                                          | 132143 | 132154 | 132165 | 132176 | 132187 | 132198 132209 |
| Candidatus Carsonella ruddii strain BT chromosome... | (132133) | TTTTCAAAGAAATTTTGTGTTGAATAATCCAACCATTAATTGTGATAAAATTATTTAAACAATCTAAACTTATTAA    |        |        |        |        |        |               |
| Candidatus Carsonella 135557 - 167442nt              | (1)      | -----                                                                           |        |        |        |        |        |               |
| SARS-CoV-2 Reference Genome NC_045512.2              | (1)      | -----                                                                           |        |        |        |        |        |               |
|                                                      |          | Section 1718                                                                    |        |        |        |        |        |               |
|                                                      | (132210) | 132210                                                                          | 132220 | 132231 | 132242 | 132253 | 132264 | 132275 132286 |
| Candidatus Carsonella ruddii strain BT chromosome... | (132210) | TATTTTTTTTTTATAAAAAGATAAAATTTTTTAAATTCCTTTTTATTTGTAAACAAAATACTTCCTAAACAAATT     |        |        |        |        |        |               |
| Candidatus Carsonella 135557 - 167442nt              | (1)      | -----                                                                           |        |        |        |        |        |               |
| SARS-CoV-2 Reference Genome NC_045512.2              | (1)      | -----                                                                           |        |        |        |        |        |               |
|                                                      |          | Section 1719                                                                    |        |        |        |        |        |               |
|                                                      | (132287) | 132287                                                                          | 132297 | 132308 | 132319 | 132330 | 132341 | 132352 132363 |
| Candidatus Carsonella ruddii strain BT chromosome... | (132287) | TTACAAAATTTTGTGTTTAAAATAAAAATCTATTATTTTACATGAATAAATTCCTCCTCCAATTTGAGCATTTATATTT |        |        |        |        |        |               |
| Candidatus Carsonella 135557 - 167442nt              | (1)      | -----                                                                           |        |        |        |        |        |               |
| SARS-CoV-2 Reference Genome NC_045512.2              | (1)      | -----                                                                           |        |        |        |        |        |               |
|                                                      |          | Section 1720                                                                    |        |        |        |        |        |               |
|                                                      | (132364) | 132364                                                                          | 132374 | 132385 | 132396 | 132407 | 132418 | 132429 132440 |
| Candidatus Carsonella ruddii strain BT chromosome... | (132364) | TTATTAATTTTAATTTTTTTTTTGTGTTTTTAAAAATATATTTATCTAATGAAACAATATGTATATTTTAAATATTTAT |        |        |        |        |        |               |
| Candidatus Carsonella 135557 - 167442nt              | (1)      | -----                                                                           |        |        |        |        |        |               |
| SARS-CoV-2 Reference Genome NC_045512.2              | (1)      | -----                                                                           |        |        |        |        |        |               |
|                                                      |          | Section 1721                                                                    |        |        |        |        |        |               |
|                                                      | (132441) | 132441                                                                          | 132451 | 132462 | 132473 | 132484 | 132495 | 132506 132517 |
| Candidatus Carsonella ruddii strain BT chromosome... | (132441) | AAAATAATAAAATTCATATATTCAAGATAATATCCATAAAAAAACATTTATTAATATCTCCTTTATATAATCTAA     |        |        |        |        |        |               |
| Candidatus Carsonella 135557 - 167442nt              | (1)      | -----                                                                           |        |        |        |        |        |               |
| SARS-CoV-2 Reference Genome NC_045512.2              | (1)      | -----                                                                           |        |        |        |        |        |               |
|                                                      |          | Section 1722                                                                    |        |        |        |        |        |               |
|                                                      | (132518) | 132518                                                                          | 132528 | 132539 | 132550 | 132561 | 132572 | 132583 132594 |
| Candidatus Carsonella ruddii strain BT chromosome... | (132518) | CAACTTTATTTTTATAAATATCTATTGATGATATTATCATAAATTTAAAAAATTATTTAATAATAATAATCCAATTT   |        |        |        |        |        |               |
| Candidatus Carsonella 135557 - 167442nt              | (1)      | -----                                                                           |        |        |        |        |        |               |
| SARS-CoV-2 Reference Genome NC_045512.2              | (1)      | -----                                                                           |        |        |        |        |        |               |

|                                                      |          |                                                                                |        |        |        |        |        |               |
|------------------------------------------------------|----------|--------------------------------------------------------------------------------|--------|--------|--------|--------|--------|---------------|
|                                                      |          | Section 1723                                                                   |        |        |        |        |        |               |
| Candidatus Carsonella ruddii strain BT chromosome... | (132595) | 132595                                                                         | 132605 | 132616 | 132627 | 132638 | 132649 | 132660 132671 |
| Candidatus Carsonella 135557 - 167442nt              | (132595) | TACTACTTTTTTCTGGATGAAATTGAAATAAAAAATTTATTTTCTTTTATAATTATAGAATTAAAAATTATATTGTTA |        |        |        |        |        |               |
| SARS-CoV-2 Reference Genome NC_045512.2              | (1)      | -----                                                                          |        |        |        |        |        |               |
|                                                      |          | Section 1724                                                                   |        |        |        |        |        |               |
| Candidatus Carsonella ruddii strain BT chromosome... | (132672) | 132672                                                                         | 132682 | 132693 | 132704 | 132715 | 132726 | 132737 132748 |
| Candidatus Carsonella 135557 - 167442nt              | (132672) | AAAATTGAAGTTGCATAAGAAAATTTTGTATTTTAAAAATAGAAGAATAACTATGCATAAAATATTGTTTAAAAATT  |        |        |        |        |        |               |
| SARS-CoV-2 Reference Genome NC_045512.2              | (1)      | -----                                                                          |        |        |        |        |        |               |
|                                                      |          | Section 1725                                                                   |        |        |        |        |        |               |
| Candidatus Carsonella ruddii strain BT chromosome... | (132749) | 132749                                                                         | 132759 | 132770 | 132781 | 132792 | 132803 | 132814 132825 |
| Candidatus Carsonella 135557 - 167442nt              | (132749) | TAATGGTAATTTTTTAAAAATTTTATGATTTTAAATAATATTAACATTATTCCAATTAATATTAGGATTTGAAGTAT  |        |        |        |        |        |               |
| SARS-CoV-2 Reference Genome NC_045512.2              | (1)      | -----                                                                          |        |        |        |        |        |               |
|                                                      |          | Section 1726                                                                   |        |        |        |        |        |               |
| Candidatus Carsonella ruddii strain BT chromosome... | (132826) | 132826                                                                         | 132836 | 132847 | 132858 | 132869 | 132880 | 132891 132902 |
| Candidatus Carsonella 135557 - 167442nt              | (132826) | TGTAACAGCAATTTTTTGCTATTAAATCAATATTTTCATTAATAATATTTAAACAATTAATTTTTTCATTTTCTATA  |        |        |        |        |        |               |
| SARS-CoV-2 Reference Genome NC_045512.2              | (1)      | -----                                                                          |        |        |        |        |        |               |
|                                                      |          | Section 1727                                                                   |        |        |        |        |        |               |
| Candidatus Carsonella ruddii strain BT chromosome... | (132903) | 132903                                                                         | 132913 | 132924 | 132935 | 132946 | 132957 | 132968 132979 |
| Candidatus Carsonella 135557 - 167442nt              | (132903) | CTTTTTTTAAAAAAATGTGGTATCCTATACATATTCCTAAAAATATAACTATTTGATAAAATAATTTTTTAAATAATA |        |        |        |        |        |               |
| SARS-CoV-2 Reference Genome NC_045512.2              | (1)      | -----                                                                          |        |        |        |        |        |               |
|                                                      |          | Section 1728                                                                   |        |        |        |        |        |               |
| Candidatus Carsonella ruddii strain BT chromosome... | (132980) | 132980                                                                         | 132990 | 133001 | 133012 | 133023 | 133034 | 133045 133056 |
| Candidatus Carsonella 135557 - 167442nt              | (132980) | AATTTTTTGATAAAATTTTATACAATTAGTTATGTGTCCTTGACCTGGAAAAATAATTTTATCGTAATGTTTTTTTT  |        |        |        |        |        |               |
| SARS-CoV-2 Reference Genome NC_045512.2              | (1)      | -----                                                                          |        |        |        |        |        |               |



|                                                      |          |                                                                                  |        |        |        |        |        |               |
|------------------------------------------------------|----------|----------------------------------------------------------------------------------|--------|--------|--------|--------|--------|---------------|
|                                                      |          | Section 1729                                                                     |        |        |        |        |        |               |
|                                                      | (133057) | 133057                                                                           | 133067 | 133078 | 133089 | 133100 | 133111 | 133122 133133 |
| Candidatus Carsonella ruddii strain BT chromosome... | (133057) | CAAAATTATTTATAAAAACCTTTATTTTTTTTACTTTTTTTAAAGCATTATAAATTGAATTTATATTACTTGTTCCA    |        |        |        |        |        |               |
| Candidatus Carsonella 135557 - 167442nt              | (1)      | -----                                                                            |        |        |        |        |        |               |
| SARS-CoV-2 Reference Genome NC_045512.2              | (1)      | -----                                                                            |        |        |        |        |        |               |
|                                                      |          | Section 1730                                                                     |        |        |        |        |        |               |
|                                                      | (133134) | 133134                                                                           | 133144 | 133155 | 133166 | 133177 | 133188 | 133199 133210 |
| Candidatus Carsonella ruddii strain BT chromosome... | (133134) | TAATTAATTAATAAAATATTCATAAAAATCCTTTGTAGATTGTAAAAATATTACAATTTTGTAGATTATTAAAGATA    |        |        |        |        |        |               |
| Candidatus Carsonella 135557 - 167442nt              | (1)      | -----                                                                            |        |        |        |        |        |               |
| SARS-CoV-2 Reference Genome NC_045512.2              | (1)      | -----                                                                            |        |        |        |        |        |               |
|                                                      |          | Section 1731                                                                     |        |        |        |        |        |               |
|                                                      | (133211) | 133211                                                                           | 133221 | 133232 | 133243 | 133254 | 133265 | 133276 133287 |
| Candidatus Carsonella ruddii strain BT chromosome... | (133211) | ATACCAAATAATTTAAAAATTGATTCAATTAAATGATGTTTATTAAAAATAATTAATATAATATAAAATAAAAAACAACA |        |        |        |        |        |               |
| Candidatus Carsonella 135557 - 167442nt              | (1)      | -----                                                                            |        |        |        |        |        |               |
| SARS-CoV-2 Reference Genome NC_045512.2              | (1)      | -----                                                                            |        |        |        |        |        |               |
|                                                      |          | Section 1732                                                                     |        |        |        |        |        |               |
|                                                      | (133288) | 133288                                                                           | 133298 | 133309 | 133320 | 133331 | 133342 | 133353 133364 |
| Candidatus Carsonella ruddii strain BT chromosome... | (133288) | TTTATAATTTTTTGAAAAAGAAGAAAAAATTCTCTTATAATTTGTAAATCTAAATCTAAATTTAAAAAATTATCGT     |        |        |        |        |        |               |
| Candidatus Carsonella 135557 - 167442nt              | (1)      | -----                                                                            |        |        |        |        |        |               |
| SARS-CoV-2 Reference Genome NC_045512.2              | (1)      | -----                                                                            |        |        |        |        |        |               |
|                                                      |          | Section 1733                                                                     |        |        |        |        |        |               |
|                                                      | (133365) | 133365                                                                           | 133375 | 133386 | 133397 | 133408 | 133419 | 133430 133441 |
| Candidatus Carsonella ruddii strain BT chromosome... | (133365) | AATAAAATATTCTATTACATGCATCAATACTCATTAAAAACAAAAGAATCATCCATACAAATATAATAACTATTATAT   |        |        |        |        |        |               |
| Candidatus Carsonella 135557 - 167442nt              | (1)      | -----                                                                            |        |        |        |        |        |               |
| SARS-CoV-2 Reference Genome NC_045512.2              | (1)      | -----                                                                            |        |        |        |        |        |               |
|                                                      |          | Section 1734                                                                     |        |        |        |        |        |               |
|                                                      | (133442) | 133442                                                                           | 133452 | 133463 | 133474 | 133485 | 133496 | 133507 133518 |
| Candidatus Carsonella ruddii strain BT chromosome... | (133442) | CTATTTATTTTTTGTTTTTTTAATAATAAACTTAACTTATTGAAATATCTTCTATACAATGATGATTATCAATTTT     |        |        |        |        |        |               |
| Candidatus Carsonella 135557 - 167442nt              | (1)      | -----                                                                            |        |        |        |        |        |               |
| SARS-CoV-2 Reference Genome NC_045512.2              | (1)      | -----                                                                            |        |        |        |        |        |               |

|                                                      |          |                                                                                |        |        |        |        |        |               |
|------------------------------------------------------|----------|--------------------------------------------------------------------------------|--------|--------|--------|--------|--------|---------------|
|                                                      |          | Section 1735                                                                   |        |        |        |        |        |               |
|                                                      | (133519) | 133519                                                                         | 133529 | 133540 | 133551 | 133562 | 133573 | 133584 133595 |
| Candidatus Carsonella ruddii strain BT chromosome... | (133519) | AAGGTCTGAATAACATCTTAAATAACAATCAAATAAACTATAATTTATAAAATTGTGATATAATATGATCAAAATAAA |        |        |        |        |        |               |
| Candidatus Carsonella 135557 - 167442nt              | (1)      | -----                                                                          |        |        |        |        |        |               |
| SARS-CoV-2 Reference Genome NC_045512.2              | (1)      | -----                                                                          |        |        |        |        |        |               |
|                                                      |          | Section 1736                                                                   |        |        |        |        |        |               |
|                                                      | (133596) | 133596                                                                         | 133606 | 133617 | 133628 | 133639 | 133650 | 133661 133672 |
| Candidatus Carsonella ruddii strain BT chromosome... | (133596) | AAATTGAAGTTTTAATTTTAAAAATACCAATACCAAAAAAATTTAATTTAATTTCAATATCAGATTCTAATGATTTT  |        |        |        |        |        |               |
| Candidatus Carsonella 135557 - 167442nt              | (1)      | -----                                                                          |        |        |        |        |        |               |
| SARS-CoV-2 Reference Genome NC_045512.2              | (1)      | -----                                                                          |        |        |        |        |        |               |
|                                                      |          | Section 1737                                                                   |        |        |        |        |        |               |
|                                                      | (133673) | 133673                                                                         | 133683 | 133694 | 133705 | 133716 | 133727 | 133738 133749 |
| Candidatus Carsonella ruddii strain BT chromosome... | (133673) | CTTCTTAATTGGTAAATTTTCATATTTTAAGGCTAAATAGCTCAGTAGGCAGAGCAAAGGACTGAAAATCCTTGTTGT |        |        |        |        |        |               |
| Candidatus Carsonella 135557 - 167442nt              | (1)      | -----                                                                          |        |        |        |        |        |               |
| SARS-CoV-2 Reference Genome NC_045512.2              | (1)      | -----                                                                          |        |        |        |        |        |               |
|                                                      |          | Section 1738                                                                   |        |        |        |        |        |               |
|                                                      | (133750) | 133750                                                                         | 133760 | 133771 | 133782 | 133793 | 133804 | 133815 133826 |
| Candidatus Carsonella ruddii strain BT chromosome... | (133750) | CGGTGGTTTCGATTCCACCTTTAGCTATGAGATATAGCCAAGTGGTAAGGCATTGGTCTTTGACTCCAAAATCCTAGG |        |        |        |        |        |               |
| Candidatus Carsonella 135557 - 167442nt              | (1)      | -----                                                                          |        |        |        |        |        |               |
| SARS-CoV-2 Reference Genome NC_045512.2              | (1)      | -----                                                                          |        |        |        |        |        |               |
|                                                      |          | Section 1739                                                                   |        |        |        |        |        |               |
|                                                      | (133827) | 133827                                                                         | 133837 | 133848 | 133859 | 133870 | 133881 | 133892 133903 |
| Candidatus Carsonella ruddii strain BT chromosome... | (133827) | TTCAATTCCTAGTATCTCAGAGCTTTTGTAGCTTAAAAGGTAAAGCTGTTGATTTGTAATCAGCTGTTCCGGGTTCA  |        |        |        |        |        |               |
| Candidatus Carsonella 135557 - 167442nt              | (1)      | -----                                                                          |        |        |        |        |        |               |
| SARS-CoV-2 Reference Genome NC_045512.2              | (1)      | -----                                                                          |        |        |        |        |        |               |
|                                                      |          | Section 1740                                                                   |        |        |        |        |        |               |
|                                                      | (133904) | 133904                                                                         | 133914 | 133925 | 133936 | 133947 | 133958 | 133969 133980 |
| Candidatus Carsonella ruddii strain BT chromosome... | (133904) | ATTCCTGGCGAAAGTATTTTATTATGGAGATGATGGGAATTGAACCCATATCCGTTTTAAAAAATATAAAAAATATAA |        |        |        |        |        |               |
| Candidatus Carsonella 135557 - 167442nt              | (1)      | -----                                                                          |        |        |        |        |        |               |
| SARS-CoV-2 Reference Genome NC_045512.2              | (1)      | -----                                                                          |        |        |        |        |        |               |

## SARS-CoV-2 &amp; Bakterien.apr

|                                                      |          |                                                                                |        |        |        |        |        |               |
|------------------------------------------------------|----------|--------------------------------------------------------------------------------|--------|--------|--------|--------|--------|---------------|
|                                                      |          | Section 1741                                                                   |        |        |        |        |        |               |
|                                                      | (133981) | 133981                                                                         | 133991 | 134002 | 134013 | 134024 | 134035 | 134046 134057 |
| Candidatus Carsonella ruddii strain BT chromosome... | (133981) | TACATGATTTATTAGTTAGATATTTTTATTATTTAATATTATATTTTTTTAGTATGATTTACAATTTTTTTTTAT    |        |        |        |        |        |               |
| Candidatus Carsonella 135557 - 167442nt              | (1)      | -----                                                                          |        |        |        |        |        |               |
| SARS-CoV-2 Reference Genome NC_045512.2              | (1)      | -----                                                                          |        |        |        |        |        |               |
|                                                      |          | Section 1742                                                                   |        |        |        |        |        |               |
|                                                      | (134058) | 134058                                                                         | 134068 | 134079 | 134090 | 134101 | 134112 | 134123 134134 |
| Candidatus Carsonella ruddii strain BT chromosome... | (134058) | TCATGTCAAAAAATTCATTCTTCATAACGTCACACCTTTCATCCCCTTGATTTTTTTTTTACTAAAGAAATTTTT    |        |        |        |        |        |               |
| Candidatus Carsonella 135557 - 167442nt              | (1)      | -----                                                                          |        |        |        |        |        |               |
| SARS-CoV-2 Reference Genome NC_045512.2              | (1)      | -----                                                                          |        |        |        |        |        |               |
|                                                      |          | Section 1743                                                                   |        |        |        |        |        |               |
|                                                      | (134135) | 134135                                                                         | 134145 | 134156 | 134167 | 134178 | 134189 | 134200 134211 |
| Candidatus Carsonella ruddii strain BT chromosome... | (134135) | ATTTTAAAAAAGATTTTATCTTAAATAAAAAAATAGGAATACATTATAATTTTTATTTTTTAAACGTTTAAAT      |        |        |        |        |        |               |
| Candidatus Carsonella 135557 - 167442nt              | (1)      | -----                                                                          |        |        |        |        |        |               |
| SARS-CoV-2 Reference Genome NC_045512.2              | (1)      | -----                                                                          |        |        |        |        |        |               |
|                                                      |          | Section 1744                                                                   |        |        |        |        |        |               |
|                                                      | (134212) | 134212                                                                         | 134222 | 134233 | 134244 | 134255 | 134266 | 134277 134288 |
| Candidatus Carsonella ruddii strain BT chromosome... | (134212) | AAAAAAAATTTCTTTTTTATTTAATAAAAGAAATCTATTATTATTATTAAAAACAAAAACAAACGTTATTGTTATCTA |        |        |        |        |        |               |
| Candidatus Carsonella 135557 - 167442nt              | (1)      | -----                                                                          |        |        |        |        |        |               |
| SARS-CoV-2 Reference Genome NC_045512.2              | (1)      | -----                                                                          |        |        |        |        |        |               |
|                                                      |          | Section 1745                                                                   |        |        |        |        |        |               |
|                                                      | (134289) | 134289                                                                         | 134299 | 134310 | 134321 | 134332 | 134343 | 134354 134365 |
| Candidatus Carsonella ruddii strain BT chromosome... | (134289) | TTTTAATAAACTTGAATTAAATTTAATTTATTAAATTTAATAATATTTATGTCTTTTTTATTTAATTTTATACCA    |        |        |        |        |        |               |
| Candidatus Carsonella 135557 - 167442nt              | (1)      | -----                                                                          |        |        |        |        |        |               |
| SARS-CoV-2 Reference Genome NC_045512.2              | (1)      | -----                                                                          |        |        |        |        |        |               |
|                                                      |          | Section 1746                                                                   |        |        |        |        |        |               |
|                                                      | (134366) | 134366                                                                         | 134376 | 134387 | 134398 | 134409 | 134420 | 134431 134442 |
| Candidatus Carsonella ruddii strain BT chromosome... | (134366) | GAAATAAAATTTTTTACAAAATAATACTTATCTAAAAAAATTTACTTATTTTATACATATGGAAAAAGAATTTTCG   |        |        |        |        |        |               |
| Candidatus Carsonella 135557 - 167442nt              | (1)      | -----                                                                          |        |        |        |        |        |               |
| SARS-CoV-2 Reference Genome NC_045512.2              | (1)      | -----                                                                          |        |        |        |        |        |               |

|                                                      |          |                                                                               |        |        |        |        |        |               |
|------------------------------------------------------|----------|-------------------------------------------------------------------------------|--------|--------|--------|--------|--------|---------------|
|                                                      |          | Section 1747                                                                  |        |        |        |        |        |               |
|                                                      | (134443) | 134443                                                                        | 134453 | 134464 | 134475 | 134486 | 134497 | 134508 134519 |
| Candidatus Carsonella ruddii strain BT chromosome... | (134443) | TTGTTAAATTTTTTAGAAAGAGTAACAATATTAGAAGAAAAATTCTTCTTCTTTATAACAAATGCAAAAAAATTTA  |        |        |        |        |        |               |
| Candidatus Carsonella 135557 - 167442nt              | (1)      | -----                                                                         |        |        |        |        |        |               |
| SARS-CoV-2 Reference Genome NC_045512.2              | (1)      | -----                                                                         |        |        |        |        |        |               |
|                                                      |          | Section 1748                                                                  |        |        |        |        |        |               |
|                                                      | (134520) | 134520                                                                        | 134530 | 134541 | 134552 | 134563 | 134574 | 134585 134596 |
| Candidatus Carsonella ruddii strain BT chromosome... | (134520) | TAAACATAATTTAGAAGAATTCAATAATCTTAAAGAATCTTTAATAAATAATATATTATCAGAATTGATACCAATTA |        |        |        |        |        |               |
| Candidatus Carsonella 135557 - 167442nt              | (1)      | -----                                                                         |        |        |        |        |        |               |
| SARS-CoV-2 Reference Genome NC_045512.2              | (1)      | -----                                                                         |        |        |        |        |        |               |
|                                                      |          | Section 1749                                                                  |        |        |        |        |        |               |
|                                                      | (134597) | 134597                                                                        | 134607 | 134618 | 134629 | 134640 | 134651 | 134662 134673 |
| Candidatus Carsonella ruddii strain BT chromosome... | (134597) | CTGATACGTTAGAAATGTTTTCAAAAAATTTTACTTCAAATCAAAATAATGAAATTGAAATTTTAGTATTAATTTTT |        |        |        |        |        |               |
| Candidatus Carsonella 135557 - 167442nt              | (1)      | -----                                                                         |        |        |        |        |        |               |
| SARS-CoV-2 Reference Genome NC_045512.2              | (1)      | -----                                                                         |        |        |        |        |        |               |
|                                                      |          | Section 1750                                                                  |        |        |        |        |        |               |
|                                                      | (134674) | 134674                                                                        | 134684 | 134695 | 134706 | 134717 | 134728 | 134739 134750 |
| Candidatus Carsonella ruddii strain BT chromosome... | (134674) | AAATTAATAAAAAAATTTTTTTTAAATTTAATATAAAACAAATTTCAAAAAATTGGTATTTTATTTAATCCTGAAAT |        |        |        |        |        |               |
| Candidatus Carsonella 135557 - 167442nt              | (1)      | -----                                                                         |        |        |        |        |        |               |
| SARS-CoV-2 Reference Genome NC_045512.2              | (1)      | -----                                                                         |        |        |        |        |        |               |
|                                                      |          | Section 1751                                                                  |        |        |        |        |        |               |
|                                                      | (134751) | 134751                                                                        | 134761 | 134772 | 134783 | 134794 | 134805 | 134816 134827 |
| Candidatus Carsonella ruddii strain BT chromosome... | (134751) | ACATGAAGCAATAGGAATTTATCCTACAGAAAGTAACAAAAAAGGTATTATTAAAGTATTTACAAACAGGATATA   |        |        |        |        |        |               |
| Candidatus Carsonella 135557 - 167442nt              | (1)      | -----                                                                         |        |        |        |        |        |               |
| SARS-CoV-2 Reference Genome NC_045512.2              | (1)      | -----                                                                         |        |        |        |        |        |               |
|                                                      |          | Section 1752                                                                  |        |        |        |        |        |               |
|                                                      | (134828) | 134828                                                                        | 134838 | 134849 | 134860 | 134871 | 134882 | 134893 134904 |
| Candidatus Carsonella ruddii strain BT chromosome... | (134828) | CAAAGAATGGTATTCTTATTAGACCTGCTTTAGTTGTTATTTACAATTAAACAATAACAATTGAAAATAAGAAAAA  |        |        |        |        |        |               |
| Candidatus Carsonella 135557 - 167442nt              | (1)      | -----                                                                         |        |        |        |        |        |               |
| SARS-CoV-2 Reference Genome NC_045512.2              | (1)      | -----                                                                         |        |        |        |        |        |               |

|                                                      |          |                                                                                |        |        |        |        |        |               |
|------------------------------------------------------|----------|--------------------------------------------------------------------------------|--------|--------|--------|--------|--------|---------------|
|                                                      |          | Section 1753                                                                   |        |        |        |        |        |               |
|                                                      | (134905) | 134905                                                                         | 134915 | 134926 | 134937 | 134948 | 134959 | 134970 134981 |
| Candidatus Carsonella ruddii strain BT chromosome... | (134905) | AAAAAATATAATTATATTAAAAAATATGAGTAAAAATAATTGGAATAGATTTAGGAACAACAAATTCTTGTTAGCTG  |        |        |        |        |        |               |
| Candidatus Carsonella 135557 - 167442nt              | (1)      | -----                                                                          |        |        |        |        |        |               |
| SARS-CoV-2 Reference Genome NC_045512.2              | (1)      | -----                                                                          |        |        |        |        |        |               |
|                                                      |          | Section 1754                                                                   |        |        |        |        |        |               |
|                                                      | (134982) | 134982                                                                         | 134992 | 135003 | 135014 | 135025 | 135036 | 135047 135058 |
| Candidatus Carsonella ruddii strain BT chromosome... | (134982) | TTTTAAACAATGGTAAACCACAAGTAATTGAAAAATTCAGAAGGAGGACGTACAACACCGTCAGTAGTAGGATATACA |        |        |        |        |        |               |
| Candidatus Carsonella 135557 - 167442nt              | (1)      | -----                                                                          |        |        |        |        |        |               |
| SARS-CoV-2 Reference Genome NC_045512.2              | (1)      | -----                                                                          |        |        |        |        |        |               |
|                                                      |          | Section 1755                                                                   |        |        |        |        |        |               |
|                                                      | (135059) | 135059                                                                         | 135069 | 135080 | 135091 | 135102 | 135113 | 135124 135135 |
| Candidatus Carsonella ruddii strain BT chromosome... | (135059) | GATGATAATAGAATTATTGTTGGATTACCAGCAAAAAGACAAGCTATAACTAATCCTAAAAATACTTTATATGCTAT  |        |        |        |        |        |               |
| Candidatus Carsonella 135557 - 167442nt              | (1)      | -----                                                                          |        |        |        |        |        |               |
| SARS-CoV-2 Reference Genome NC_045512.2              | (1)      | -----                                                                          |        |        |        |        |        |               |
|                                                      |          | Section 1756                                                                   |        |        |        |        |        |               |
|                                                      | (135136) | 135136                                                                         | 135146 | 135157 | 135168 | 135179 | 135190 | 135201 135212 |
| Candidatus Carsonella ruddii strain BT chromosome... | (135136) | TAAAAGATTAATAGGAAGAAAATATACAGATGATATAGTACAAAAAGATATTAAAATGGTACCATATAATATTATAT  |        |        |        |        |        |               |
| Candidatus Carsonella 135557 - 167442nt              | (1)      | -----                                                                          |        |        |        |        |        |               |
| SARS-CoV-2 Reference Genome NC_045512.2              | (1)      | -----                                                                          |        |        |        |        |        |               |
|                                                      |          | Section 1757                                                                   |        |        |        |        |        |               |
|                                                      | (135213) | 135213                                                                         | 135223 | 135234 | 135245 | 135256 | 135267 | 135278 135289 |
| Candidatus Carsonella ruddii strain BT chromosome... | (135213) | CATCTGAAAACGGGGATGCATGGGTTGAAGTAAAAGATAAAAAATTAGCTCCACCACAAATAAGTGCAGAAATTTTA  |        |        |        |        |        |               |
| Candidatus Carsonella 135557 - 167442nt              | (1)      | -----                                                                          |        |        |        |        |        |               |
| SARS-CoV-2 Reference Genome NC_045512.2              | (1)      | -----                                                                          |        |        |        |        |        |               |
|                                                      |          | Section 1758                                                                   |        |        |        |        |        |               |
|                                                      | (135290) | 135290                                                                         | 135300 | 135311 | 135322 | 135333 | 135344 | 135355 135366 |
| Candidatus Carsonella ruddii strain BT chromosome... | (135290) | AAAAAATGAAATTAACAGCTGAATCATATTTAAATGAAAAAATTTATAAAGCAGTAATTACTGTACCAGCATATTT   |        |        |        |        |        |               |
| Candidatus Carsonella 135557 - 167442nt              | (1)      | -----                                                                          |        |        |        |        |        |               |
| SARS-CoV-2 Reference Genome NC_045512.2              | (1)      | -----                                                                          |        |        |        |        |        |               |

|                                                      |          |                                                                                  |        |        |        |        |        |               |
|------------------------------------------------------|----------|----------------------------------------------------------------------------------|--------|--------|--------|--------|--------|---------------|
|                                                      |          | Section 1759                                                                     |        |        |        |        |        |               |
|                                                      | (135367) | 135367                                                                           | 135377 | 135388 | 135399 | 135410 | 135421 | 135432 135443 |
| Candidatus Carsonella ruddii strain BT chromosome... | (135367) | TAATGATTTCGCAAAGACAAGCAACAAAAGATGCTGGAAAAATAGCAGGATTAGATGTACTAAGAATAATAAATGAAC   |        |        |        |        |        |               |
| Candidatus Carsonella 135557 - 167442nt              | (1)      | -----                                                                            |        |        |        |        |        |               |
| SARS-CoV-2 Reference Genome NC_045512.2              | (1)      | -----                                                                            |        |        |        |        |        |               |
|                                                      |          | Section 1760                                                                     |        |        |        |        |        |               |
|                                                      | (135444) | 135444                                                                           | 135454 | 135465 | 135476 | 135487 | 135498 | 135509 135520 |
| Candidatus Carsonella ruddii strain BT chromosome... | (135444) | CAACTGCTGCAGCATTAGCATATGGTTTAGATAAAAAAAAAAGAGATAGAATTATAGTAGTATATGATTTAGGAGGT    |        |        |        |        |        |               |
| Candidatus Carsonella 135557 - 167442nt              | (1)      | -----                                                                            |        |        |        |        |        |               |
| SARS-CoV-2 Reference Genome NC_045512.2              | (1)      | -----                                                                            |        |        |        |        |        |               |
|                                                      |          | Section 1761                                                                     |        |        |        |        |        |               |
|                                                      | (135521) | 135521                                                                           | 135531 | 135542 | 135553 | 135564 | 135575 | 135586 135597 |
| Candidatus Carsonella ruddii strain BT chromosome... | (135521) | GGAAC TTTTGATATTTCTATTATTGAAATTGCTAAT GTTGAAGGAGAACTCAATTTGAAGTTTATCCACAAATGG    |        |        |        |        |        |               |
| Candidatus Carsonella 135557 - 167442nt              | (1)      | ----- GTTGAAGGAGAACTCAATTTGAAGTTTATCCACAAATGG                                    |        |        |        |        |        |               |
| SARS-CoV-2 Reference Genome NC_045512.2              | (1)      | ----- ATTAAAGGTTTATACG--TTCCCAGGTA----ACAAA CCA                                  |        |        |        |        |        |               |
|                                                      |          | Section 1762                                                                     |        |        |        |        |        |               |
|                                                      | (135598) | 135598                                                                           | 135608 | 135619 | 135630 | 135641 | 135652 | 135663 135674 |
| Candidatus Carsonella ruddii strain BT chromosome... | (135598) | AGATACTTTT TAGGAGGTGAAGATTTTGATATGAGAA TAA TTAATCATTTAATTTATGAATTTAAAAATGAAAATG  |        |        |        |        |        |               |
| Candidatus Carsonella 135557 - 167442nt              | (42)     | AGATACTTTT TAGGAGGTGAAGATTTTGATATGAGAA TAA TTAATCATTTAATTTATGAATTTAAAAATGAAAATG  |        |        |        |        |        |               |
| SARS-CoV-2 Reference Genome NC_045512.2              | (35)     | ACCAACTTTTCG-ATCTCT TGTAGATCT-GTCTC-----TAAACGAAAC-TTTAAATCTGTGT----GGCTGTCACTC  |        |        |        |        |        |               |
|                                                      |          | Section 1763                                                                     |        |        |        |        |        |               |
|                                                      | (135675) | 135675                                                                           | 135685 | 135696 | 135707 | 135718 | 135729 | 135740 135751 |
| Candidatus Carsonella ruddii strain BT chromosome... | (135675) | GAATTGATT-TAAGTGGAGATTCTCTAGCAATGCAAAGATTAAAAGAAT-CTGCTGAAAAAGCAAAAATAG-AAATTA   |        |        |        |        |        |               |
| Candidatus Carsonella 135557 - 167442nt              | (119)    | GAATTGATT-TAAGTGGAGATTCTCTAGCAATGCAAAGATTAAAAGAAT-CTGCTGAAAAAGCAAAAATAG-AAATTA   |        |        |        |        |        |               |
| SARS-CoV-2 Reference Genome NC_045512.2              | (101)    | GGCTGCAATGCTTAGTGCA--CTCAC--GCAGTATAA TTAATAA CTAATTACTGTCGTTGACAGGACACGAGTAACTC |        |        |        |        |        |               |
|                                                      |          | Section 1764                                                                     |        |        |        |        |        |               |
|                                                      | (135752) | 135752                                                                           | 135762 | 135773 | 135784 | 135795 | 135806 | 135817 135828 |
| Candidatus Carsonella ruddii strain BT chromosome... | (135749) | TCAAATACAGAACAAACTGACATTAA TTTACCATATATTACAGCTGATAAAAACGGTCCTAAACATTTAAATATTAA   |        |        |        |        |        |               |
| Candidatus Carsonella 135557 - 167442nt              | (193)    | TCAAATACAGAACAAACTGACATTAA TTTACCATATATTACAGCTGATAAAAACGGTCCTAAACATTTAAATATTAA   |        |        |        |        |        |               |
| SARS-CoV-2 Reference Genome NC_045512.2              | (174)    | GTCTATCTTCTG CAGGCTGCTTACGGTTT CGTCCGTGTTGCAGCCGATCATCA-GCAGATCTAGGTTT CGTCCGGGT |        |        |        |        |        |               |

|                                                      |          |                                                                                   |        |        |        |        |        |        |               |
|------------------------------------------------------|----------|-----------------------------------------------------------------------------------|--------|--------|--------|--------|--------|--------|---------------|
|                                                      |          | Section 1765                                                                      |        |        |        |        |        |        |               |
|                                                      |          | (135829)                                                                          | 135829 | 135839 | 135850 | 135861 | 135872 | 135883 | 135894 135905 |
| Candidatus Carsonella ruddii strain BT chromosome... | (135826) | AATAACTAGATCTAAATTAGAATCTTTAGTAGAAGATTTAATTATTAAATCAT---TAAACCATGTGAAATGCTT       |        |        |        |        |        |        |               |
| Candidatus Carsonella 135557 - 167442nt              | (270)    | AATAACTAGATCTAAATTAGAATCTTTAGTAGAAGATTTAATTATTAAATCAT---TAAACCATGTGAAATGCTT       |        |        |        |        |        |        |               |
| SARS-CoV-2 Reference Genome NC_045512.2              | (250)    | GTGACGAAAGGTAAAGATGAGAGCCTTGTCCCTGGTTTCAACGAGAAACAACACGTCCAACTCAGTTTGCCGTGTTT     |        |        |        |        |        |        |               |
|                                                      |          | Section 1766                                                                      |        |        |        |        |        |        |               |
|                                                      |          | (135906)                                                                          | 135906 | 135916 | 135927 | 135938 | 135949 | 135960 | 135971 135982 |
| Candidatus Carsonella ruddii strain BT chromosome... | (135900) | TAAATGATGC AAAAATAGACAAAAC TAAATTTGATGAAATTATTTTAGTAGGAGGACAAACAAGAATGCCACTTGTTG  |        |        |        |        |        |        |               |
| Candidatus Carsonella 135557 - 167442nt              | (344)    | TAAATGATGC AAAAATAGACAAAAC TAAATTTGATGAAATTATTTTAGTAGGAGGACAAACAAGAATGCCACTTGTTG  |        |        |        |        |        |        |               |
| SARS-CoV-2 Reference Genome NC_045512.2              | (327)    | TACAGGTTTCGCGACGTGCTCGTACGTGGCTTTG--GAGACTCCGT--GGAGGAGGTCTTATCAGA--GGCACGTCAA    |        |        |        |        |        |        |               |
|                                                      |          | Section 1767                                                                      |        |        |        |        |        |        |               |
|                                                      |          | (135983)                                                                          | 135983 | 135993 | 136004 | 136015 | 136026 | 136037 | 136048 136059 |
| Candidatus Carsonella ruddii strain BT chromosome... | (135977) | CA----AAAAATGGTAAGTGATTTT TTTGAAAAGAAGTTAAAAAGATATTAATCCAGATGAAGCAGTAGCAGTAG      |        |        |        |        |        |        |               |
| Candidatus Carsonella 135557 - 167442nt              | (421)    | CA----AAAAATGGTAAGTGATTTT TTTGAAAAGAAGTTAAAAAGATATTAATCCAGATGAAGCAGTAGCAGTAG      |        |        |        |        |        |        |               |
| SARS-CoV-2 Reference Genome NC_045512.2              | (398)    | CATCTTAAAGATGGCACTGTGGCTT----AGTAGAAGTTGAAAAAGGCGTTTGTGCCCTCAACTTG--ACAGCCAT      |        |        |        |        |        |        |               |
|                                                      |          | Section 1768                                                                      |        |        |        |        |        |        |               |
|                                                      |          | (136060)                                                                          | 136060 | 136070 | 136081 | 136092 | 136103 | 136114 | 136125 136136 |
| Candidatus Carsonella ruddii strain BT chromosome... | (136050) | GCG--CATCA---GTAC--AAGCTGGAGTTTAAAGT---GGTGTAGTTAAAGATGTTTTATTATTAGATGTT-CTC      |        |        |        |        |        |        |               |
| Candidatus Carsonella 135557 - 167442nt              | (494)    | GCG--CATCA---GTAC--AAGCTGGAGTTTAAAGT---GGTGTAGTTAAAGATGTTTTATTATTAGATGTT-CTC      |        |        |        |        |        |        |               |
| SARS-CoV-2 Reference Genome NC_045512.2              | (470)    | GTGTTTATCAAAACGTTCCGATGCTCGAACCTGCACCTCATGGTCATGTTATGTTAGCTGGTAGCAGAACTCGAAGG     |        |        |        |        |        |        |               |
|                                                      |          | Section 1769                                                                      |        |        |        |        |        |        |               |
|                                                      |          | (136137)                                                                          | 136137 | 136147 | 136158 | 136169 | 136180 | 136191 | 136202 136213 |
| Candidatus Carsonella ruddii strain BT chromosome... | (136116) | CATTAA---CGTTAG--GTATAGAAACAATGGGTGGAATAATGACACCTTTAATAGAAAAAACACAACATAACCTA      |        |        |        |        |        |        |               |
| Candidatus Carsonella 135557 - 167442nt              | (560)    | CATTAA---CGTTAG--GTATAGAAACAATGGGTGGAATAATGACACCTTTAATAGAAAAAACACAACATAACCTA      |        |        |        |        |        |        |               |
| SARS-CoV-2 Reference Genome NC_045512.2              | (547)    | CATTCAAGTACGGTCGTAGTGGTGAACACTTGGTGTCCTTGTCCCTCATGTGGGCAGAA--A-----TACC--A        |        |        |        |        |        |        |               |
|                                                      |          | Section 1770                                                                      |        |        |        |        |        |        |               |
|                                                      |          | (136214)                                                                          | 136214 | 136224 | 136235 | 136246 | 136257 | 136268 | 136279 136290 |
| Candidatus Carsonella ruddii strain BT chromosome... | (136188) | CAAGAAAAACTCAAGTTT TTTCTACTGCAGAA--GATAATCAAAC TGCAGTTACAATTATACACTCTTCAAGGAGAAAG |        |        |        |        |        |        |               |
| Candidatus Carsonella 135557 - 167442nt              | (632)    | CAAGAAAAACTCAAGTTT TTTCTACTGCAGAA--GATAATCAAAC TGCAGTTACAATTATACACTCTTCAAGGAGAAAG |        |        |        |        |        |        |               |
| SARS-CoV-2 Reference Genome NC_045512.2              | (611)    | GTGGCTTACGCAAGGTTCTTCTTCTGTAAGAACGGTAATAA---GAGCTGGTGGCCATAGT-TACGGCCCGATC        |        |        |        |        |        |        |               |

## SARS-CoV-2 &amp; Bakterien.apr

|                                                      |          |                                                                                  |        |        |        |        |        |        |        |
|------------------------------------------------------|----------|----------------------------------------------------------------------------------|--------|--------|--------|--------|--------|--------|--------|
| Section 1771                                         |          |                                                                                  |        |        |        |        |        |        |        |
|                                                      | (136291) | 136291                                                                           | 136301 | 136312 | 136323 | 136334 | 136345 | 136356 | 136367 |
| Candidatus Carsonella ruddii strain BT chromosome... | (136264) | AAAAAAAGCTTCACAAAATAAATCATTAGGAAAAATTTGATTTAAATGATATTTCTCCAGCACCAAGAGGTTGTTCTCTC |        |        |        |        |        |        |        |
| Candidatus Carsonella 135557 - 167442nt              | (708)    | AAAAAAAGCTTCACAAAATAAATCATTAGGAAAAATTTGATTTAAATGATATTTCTCCAGCACCAAGAGGTTGTTCTCTC |        |        |        |        |        |        |        |
| SARS-CoV-2 Reference Genome NC_045512.2              | (684)    | TAAAGTCATTTGACTTAGGCGACGAGCTTGGCACT--GATCCTTATGAGATTTCAGAA--AACTGGAAACAATAA      |        |        |        |        |        |        |        |
| Section 1772                                         |          |                                                                                  |        |        |        |        |        |        |        |
|                                                      | (136368) | 136368                                                                           | 136378 | 136389 | 136400 | 136411 | 136422 | 136433 | 136444 |
| Candidatus Carsonella ruddii strain BT chromosome... | (136341) | AAATAGAGTTTCTTTTGATTTAGACGCTAATGGTATTTTAAACGTTACAGCTAAAGATAAAAAACAGGAAAAGAA      |        |        |        |        |        |        |        |
| Candidatus Carsonella 135557 - 167442nt              | (785)    | AAATAGAGTTTCTTTTGATTTAGACGCTAATGGTATTTTAAACGTTACAGCTAAAGATAAAAAACAGGAAAAGAA      |        |        |        |        |        |        |        |
| SARS-CoV-2 Reference Genome NC_045512.2              | (757)    | ACATAGCAGTG-----GTGTTACCCTGTA--C---T-CATGCGTG--AGCTTAACTGAG-----GGGCATACAA       |        |        |        |        |        |        |        |
| Section 1773                                         |          |                                                                                  |        |        |        |        |        |        |        |
|                                                      | (136445) | 136445                                                                           | 136455 | 136466 | 136477 | 136488 | 136499 | 136510 | 136521 |
| Candidatus Carsonella ruddii strain BT chromosome... | (136418) | CAATCTATAATTATAAAATCTTCTGGAGGATTATCTGAATTGAATTTGAAAAATATGATAAAAGATGTCAGAGCTAA    |        |        |        |        |        |        |        |
| Candidatus Carsonella 135557 - 167442nt              | (862)    | CAATCTATAATTATAAAATCTTCTGGAGGATTATCTGAATTGAATTTGAAAAATATGATAAAAGATGTCAGAGCTAA    |        |        |        |        |        |        |        |
| SARS-CoV-2 Reference Genome NC_045512.2              | (813)    | CTCGCTATGTCGATAAACAACTTCTGTGGC---CCTGATGGCTACCTCTTTGAGTGCATTAAAGACCTTCTAGCACG    |        |        |        |        |        |        |        |
| Section 1774                                         |          |                                                                                  |        |        |        |        |        |        |        |
|                                                      | (136522) | 136522                                                                           | 136532 | 136543 | 136554 | 136565 | 136576 | 136587 | 136598 |
| Candidatus Carsonella ruddii strain BT chromosome... | (136495) | TTCTGAATTGGATAAAA--ACTTTGAA-GAATTAGTAAATGTAA--AAATGAAGCTGATAGTACAATTTCAATAGT     |        |        |        |        |        |        |        |
| Candidatus Carsonella 135557 - 167442nt              | (939)    | TTCTGAATTGGATAAAA--ACTTTGAA-GAATTAGTAAATGTAA--AAATGAAGCTGATAGTACAATTTCAATAGT     |        |        |        |        |        |        |        |
| SARS-CoV-2 Reference Genome NC_045512.2              | (886)    | TGCTGTGTAAGCTTTCATGCACTTTGTCCGAACAACTGGACTTTATTGACACTAAGAGGGGTGTATCTGTG-CTGCCGT  |        |        |        |        |        |        |        |
| Section 1775                                         |          |                                                                                  |        |        |        |        |        |        |        |
|                                                      | (136599) | 136599                                                                           | 136609 | 136620 | 136631 | 136642 | 136653 | 136664 | 136675 |
| Candidatus Carsonella ruddii strain BT chromosome... | (136567) | AAGAAAAAATTTAAAAATGATGAAAAACAAAAATAAGTGATGAAGAAAAAGAATCAATTGAAAAATCAATATCAAATT   |        |        |        |        |        |        |        |
| Candidatus Carsonella 135557 - 167442nt              | (1011)   | AAGAAAAAATTTAAAAATGATGAAAAACAAAAATAAGTGATGAAGAAAAAGAATCAATTGAAAAATCAATATCAAATT   |        |        |        |        |        |        |        |
| SARS-CoV-2 Reference Genome NC_045512.2              | (962)    | GAACATGAGCATGAAATTGCTTGGTACACGGA-ACGTCTTGAA-AAAGAGCTATGAATTGCAGACACCTTTTGAAATT   |        |        |        |        |        |        |        |
| Section 1776                                         |          |                                                                                  |        |        |        |        |        |        |        |
|                                                      | (136676) | 136676                                                                           | 136686 | 136697 | 136708 | 136719 | 136730 | 136741 | 136752 |
| Candidatus Carsonella ruddii strain BT chromosome... | (136644) | TAGAATTATTAATAAAAGGTGATGATTTAACATCAATTAATAAAG--CAAATGAAG-ATTTACTAAAAATAGTGAA     |        |        |        |        |        |        |        |
| Candidatus Carsonella 135557 - 167442nt              | (1088)   | TAGAATTATTAATAAAAGGTGATGATTTAACATCAATTAATAAAG--CAAATGAAG-ATTTACTAAAAATAGTGAA     |        |        |        |        |        |        |        |
| SARS-CoV-2 Reference Genome NC_045512.2              | (1037)   | AA--ATTGGCAAGAAATTTGAC-----ACCTCAATGGGGAAATGTCCAAATTTTGTATTTCCCTTAAAT---TCCA     |        |        |        |        |        |        |        |



## SARS-CoV-2 &amp; Bakterien.apr

|                                                      |          |                                                                                  |        |        |        |        |        |        |               |
|------------------------------------------------------|----------|----------------------------------------------------------------------------------|--------|--------|--------|--------|--------|--------|---------------|
|                                                      |          | Section 1777                                                                     |        |        |        |        |        |        |               |
|                                                      |          | (136753)                                                                         | 136753 | 136763 | 136774 | 136785 | 136796 | 136807 | 136818 136829 |
| Candidatus Carsonella ruddii strain BT chromosome... | (136718) | AATATAATTAAAAACAATAAAAAATAATAAAAGCGCTATCGTTAATGTTTAAACGATAGCGTAATAAATTAATGATT    |        |        |        |        |        |        |               |
| Candidatus Carsonella 135557 - 167442nt              | (1162)   | AATATAATTAAAAACAATAAAAAATAATAAAAGCGCTATCGTTAATGTTTAAACGATAGCGTAATAAATTAATGATT    |        |        |        |        |        |        |               |
| SARS-CoV-2 Reference Genome NC_045512.2              | (1104)   | TA-ATCAAGACTATTCAACCAGGGTTGAAAAAGAAAGCTTGATGGCTTTATGGGTAG-----AATT--CGATC        |        |        |        |        |        |        |               |
|                                                      |          | Section 1778                                                                     |        |        |        |        |        |        |               |
|                                                      |          | (136830)                                                                         | 136830 | 136840 | 136851 | 136862 | 136873 | 136884 | 136895 136906 |
| Candidatus Carsonella ruddii strain BT chromosome... | (136795) | AAAAATATTTATTTTGAATAACAGGAATAATGGGAAATCAATTTTAAATTTTTTAAATTAATATAAATTTTAA        |        |        |        |        |        |        |               |
| Candidatus Carsonella 135557 - 167442nt              | (1239)   | AAAAATATTTATTTTGAATAACAGGAATAATGGGAAATCAATTTTAAATTTTTTAAATTAATATAAATTTTAA        |        |        |        |        |        |        |               |
| SARS-CoV-2 Reference Genome NC_045512.2              | (1171)   | TGTCATCCAGTTGCG---TCACCAATGAAATGC---AACCAATGTGCCTTTC---AACTCTCATGAAGTGTGA--      |        |        |        |        |        |        |               |
|                                                      |          | Section 1779                                                                     |        |        |        |        |        |        |               |
|                                                      |          | (136907)                                                                         | 136907 | 136917 | 136928 | 136939 | 136950 | 136961 | 136972 136983 |
| Candidatus Carsonella ruddii strain BT chromosome... | (136872) | TTTATTAGGTGGAATAAATAAAAAAAATTCCTTTAAATTTATTTAAAAATAAATATAATTTAATTTTAAAAACATGA    |        |        |        |        |        |        |               |
| Candidatus Carsonella 135557 - 167442nt              | (1316)   | TTTATTAGGTGGAATAAATAAAAAAAATTCCTTTAAATTTATTTAAAAATAAATATAATTTAATTTTAAAAACATGA    |        |        |        |        |        |        |               |
| SARS-CoV-2 Reference Genome NC_045512.2              | (1237)   | -TCATT--GTGGTGAACCTTCATGGCAAGAGGGCGATTTTGTGTTAAAGCCACTTGCGA----ATTTTGTGGCAC-TGA  |        |        |        |        |        |        |               |
|                                                      |          | Section 1780                                                                     |        |        |        |        |        |        |               |
|                                                      |          | (136984)                                                                         | 136984 | 136994 | 137005 | 137016 | 137027 | 137038 | 137049 137060 |
| Candidatus Carsonella ruddii strain BT chromosome... | (136949) | GTAAAAATAGTATATTAATAGATTTTTCAAATTTTAAATTTATTTAAAA-AAAATCTTTTAAATATCGTTTTTTTTAA   |        |        |        |        |        |        |               |
| Candidatus Carsonella 135557 - 167442nt              | (1393)   | GTAAAAATAGTATATTAATAGATTTTTCAAATTTTAAATTTATTTAAAA-AAAATCTTTTAAATATCGTTTTTTTTAA   |        |        |        |        |        |        |               |
| SARS-CoV-2 Reference Genome NC_045512.2              | (1306)   | G---AATTTGACTATA-AGAAGGTGCCACTACTTGTTGGTTACTTACCCCAAAATGCTGTTGTATAAAATTTATTGTCCA |        |        |        |        |        |        |               |
|                                                      |          | Section 1781                                                                     |        |        |        |        |        |        |               |
|                                                      |          | (137061)                                                                         | 137061 | 137071 | 137082 | 137093 | 137104 | 137115 | 137126 137137 |
| Candidatus Carsonella ruddii strain BT chromosome... | (137025) | AATTCCATTAAATAATTGGAACTACAGGATTAAATATAGTTTATTAAATATATATAAAATATGATCTTTATATGTTT    |        |        |        |        |        |        |               |
| Candidatus Carsonella 135557 - 167442nt              | (1469)   | AATTCCATTAAATAATTGGAACTACAGGATTAAATATAGTTTATTAAATATATATAAAATATGATCTTTATATGTTT    |        |        |        |        |        |        |               |
| SARS-CoV-2 Reference Genome NC_045512.2              | (1379)   | GCA--GTCACATTCAGAAATAG-GACCTGAGCATAGTCTTGCCGAATACCATAA----TGAACTCTG-----GCTT     |        |        |        |        |        |        |               |
|                                                      |          | Section 1782                                                                     |        |        |        |        |        |        |               |
|                                                      |          | (137138)                                                                         | 137138 | 137148 | 137159 | 137170 | 137181 | 137192 | 137203 137214 |
| Candidatus Carsonella ruddii strain BT chromosome... | (137102) | CAATATTATTATCTTATAATATGAGTATTGGTTTAAATTTAAATTAATTATTTTATCAAAATTTAAATATTTATTTA    |        |        |        |        |        |        |               |
| Candidatus Carsonella 135557 - 167442nt              | (1546)   | CAATATTATTATCTTATAATATGAGTATTGGTTTAAATTTAAATTAATTATTTTATCAAAATTTAAATATTTATTTA    |        |        |        |        |        |        |               |
| SARS-CoV-2 Reference Genome NC_045512.2              | (1444)   | GAAACCATTCT----TCGTAGGGTGGTCGCACTATGCGCTTTGGAGGCTGTGTGTCTCTTT--ATGTTGGTTGC       |        |        |        |        |        |        |               |

## SARS-CoV-2 &amp; Bakterien.apr

|                                                      |          |                                    |                                 |                              |                       |            |        |        |        |              |
|------------------------------------------------------|----------|------------------------------------|---------------------------------|------------------------------|-----------------------|------------|--------|--------|--------|--------------|
|                                                      |          |                                    |                                 |                              |                       |            |        |        |        | Section 1783 |
|                                                      | (137215) | 137215                             | 137225                          | 137236                       | 137247                | 137258     | 137269 | 137280 | 137291 |              |
| Candidatus Carsonella ruddii strain BT chromosome... | (137179) | AAAATTTTATAATTTTAAATTTCTTTTATTTT   | AGACATTCATCATGATAAAAAA          | TAGATTCT--                   | CCAT-                 | CAGGTACATC |        |        |        |              |
| Candidatus Carsonella 135557 - 167442nt              | (1623)   | AAAATTTTATAATTTTAAATTTCTTTTATTTT   | AGACATTCATCATGATAAAAAA          | TAGATTCT--                   | CCAT-                 | CAGGTACATC |        |        |        |              |
| SARS-CoV-2 Reference Genome NC_045512.2              | (1514)   | CATA---ACAAAGTGTGTC--CTATTGGGTT    | CCACGTGC-TAGCGCTAA              | CA---TAGGTTGTAA              | CCATACAGGTG--TT       |            |        |        |        |              |
|                                                      |          |                                    |                                 |                              |                       |            |        |        |        | Section 1784 |
|                                                      | (137292) | 137292                             | 137302                          | 137313                       | 137324                | 137335     | 137346 | 137357 | 137368 |              |
| Candidatus Carsonella ruddii strain BT chromosome... | (137253) | TTTAATGATTTTCTTAAATTAATAATTTAAT    | AAAAATATTTT                     | AGTATAAGAATTAAAAATATAAT      | AGGAAACC              |            |        |        |        |              |
| Candidatus Carsonella 135557 - 167442nt              | (1697)   | TTTAATGATTTTCTTAAATTAATAATTTAAT    | AAAAATATTTT                     | AGTATAAGAATTAAAAATATAAT      | AGGAAACC              |            |        |        |        |              |
| SARS-CoV-2 Reference Genome NC_045512.2              | (1580)   | GTTGGAAGAGGTTCTCGAAAGGTC-----      | TTAATGACAACTTCTTGAAATACTC--     | CAAAAAAGAGAA-AGTCAAC-        |                       |            |        |        |        |              |
|                                                      |          |                                    |                                 |                              |                       |            |        |        |        | Section 1785 |
|                                                      | (137369) | 137369                             | 137379                          | 137390                       | 137401                | 137412     | 137423 | 137434 | 137445 |              |
| Candidatus Carsonella ruddii strain BT chromosome... | (137330) | ATGTTATTTATTTAATTTCTAATAATGAAATTAT | TAAATAGAACATTTAATATTAATAGAAATAT | TTTTTATATTG                  |                       |            |        |        |        |              |
| Candidatus Carsonella 135557 - 167442nt              | (1774)   | ATGTTATTTATTTAATTTCTAATAATGAAATTAT | TAAATAGAACATTTAATATTAATAGAAATAT | TTTTTATATTG                  |                       |            |        |        |        |              |
| SARS-CoV-2 Reference Genome NC_045512.2              | (1646)   | -----ATCAATATGTGTTGGTGACTTTAAAC    | TTAATGAAAG-AGATC----            | GCCATTA                      | TTTGTGCATCTTTTTCTGCT- |            |        |        |        |              |
|                                                      |          |                                    |                                 |                              |                       |            |        |        |        | Section 1786 |
|                                                      | (137446) | 137446                             | 137456                          | 137467                       | 137478                | 137489     | 137500 | 137511 | 137522 |              |
| Candidatus Carsonella ruddii strain BT chromosome... | (137407) | GGAATATTTTATTTCAATATTATGGTTATTGA   | ATAAAAAAAGCTTGTTTTC             | AATGATATTTATTTTATG           |                       |            |        |        |        |              |
| Candidatus Carsonella 135557 - 167442nt              | (1851)   | GGAATATTTTATTTCAATATTATGGTTATTGA   | ATAAAAAAAGCTTGTTTTC             | AATGATATTTATTTTATG           |                       |            |        |        |        |              |
| SARS-CoV-2 Reference Genome NC_045512.2              | (1712)   | -----TCCACAGTGTGCTTTTGTGGAA        | ACTGTGAAAGGTTTG                 | GATTATAAAGCATTC              | AAACAATTGTT---        |            |        |        |        |              |
|                                                      |          |                                    |                                 |                              |                       |            |        |        |        | Section 1787 |
|                                                      | (137523) | 137523                             | 137533                          | 137544                       | 137555                | 137566     | 137577 | 137588 | 137599 |              |
| Candidatus Carsonella ruddii strain BT chromosome... | (137484) | TTAATAATAGAAAGTGGTTATTTTTTTTAAAT   | GC AAAATTTGTTAATTA              | AAAAAAAGTTGTGGTGAATTAATTTTAA |                       |            |        |        |        |              |
| Candidatus Carsonella 135557 - 167442nt              | (1928)   | TTAATAATAGAAAGTGGTTATTTTTTTTAAAT   | GC AAAATTTGTTAATTA              | AAAAAAAGTTGTGGTGAATTAATTTTAA |                       |            |        |        |        |              |
| SARS-CoV-2 Reference Genome NC_045512.2              | (1775)   | -GAATCCT-----GTGGTAATTTT---        | AAAGTTACAAAGGAAAGCTAAAAA        | GTTGCC--TGGAATATTGGTGAA      |                       |            |        |        |        |              |
|                                                      |          |                                    |                                 |                              |                       |            |        |        |        | Section 1788 |
|                                                      | (137600) | 137600                             | 137610                          | 137621                       | 137632                | 137643     | 137654 | 137665 | 137676 |              |
| Candidatus Carsonella ruddii strain BT chromosome... | (137561) | TTCTTCAAATTACGGATA-----TAATGAA     | ATTATATCAGATCCATCATATAAATCACA   | ATTTTTAATCTTCTCTAA           |                       |            |        |        |        |              |
| Candidatus Carsonella 135557 - 167442nt              | (2005)   | TTCTTCAAATTACGGATA-----TAATGAA     | ATTATATCAGATCCATCATATAAATCACA   | ATTTTTAATCTTCTCTAA           |                       |            |        |        |        |              |
| SARS-CoV-2 Reference Genome NC_045512.2              | (1841)   | CAGAAATCAATACGTGTCCTCTTTATG        | CATTTGCATCAGAGGCTGCTCGTGT       | TGTACGAT---CAATTTCTC---      |                       |            |        |        |        |              |

|                                                      |          |                                                                                    |        |        |        |        |        |        |               |
|------------------------------------------------------|----------|------------------------------------------------------------------------------------|--------|--------|--------|--------|--------|--------|---------------|
|                                                      |          | Section 1789                                                                       |        |        |        |        |        |        |               |
|                                                      |          | (137677)                                                                           | 137677 | 137687 | 137698 | 137709 | 137720 | 137731 | 137742 137753 |
| Candidatus Carsonella ruddii strain BT chromosome... | (137633) | TCCACA-TATTGGAAATGTTGGAATAATAGAACAGATTTCGAATTATTTAAATATAAATAAATGCAATTATAAATT       |        |        |        |        |        |        |               |
| Candidatus Carsonella 135557 - 167442nt              | (2077)   | TCCACA-TATTGGAAATGTTGGAATAATAGAACAGATTTCGAATTATTTAAATATAAATAAATGCAATTATAAATT       |        |        |        |        |        |        |               |
| SARS-CoV-2 Reference Genome NC_045512.2              | (1912)   | -CCGCACTCTTGAAAC TGCTCAAAATTCTGTGCGTGT TTTACAGAAGGCCGCTATAACAATA---CTAGATGG AATT   |        |        |        |        |        |        |               |
|                                                      |          | Section 1790                                                                       |        |        |        |        |        |        |               |
|                                                      |          | (137754)                                                                           | 137754 | 137764 | 137775 | 137786 | 137797 | 137808 | 137819 137830 |
| Candidatus Carsonella ruddii strain BT chromosome... | (137709) | AAAAATTATTCAATATCTAGTAATTTTAGAAGTAATTTTAAATAA-ATACTTTT TTAATAATTCAAAAAATAA         |        |        |        |        |        |        |               |
| Candidatus Carsonella 135557 - 167442nt              | (2153)   | AAAAATTATTCAATATCTAGTAATTTTAGAAGTAATTTTAAATAA-ATACTTTT TTAATAATTCAAAAAATAA         |        |        |        |        |        |        |               |
| SARS-CoV-2 Reference Genome NC_045512.2              | (1985)   | TCAACAGTATTCACTGAG-AC TCATTGATGCTATGATGTTCACTCTGATTGGCTACTAAACAATCTAGTTGT AATGG    |        |        |        |        |        |        |               |
|                                                      |          | Section 1791                                                                       |        |        |        |        |        |        |               |
|                                                      |          | (137831)                                                                           | 137831 | 137841 | 137852 | 137863 | 137874 | 137885 | 137896 137907 |
| Candidatus Carsonella ruddii strain BT chromosome... | (137785) | TTTTAATTGGAATTGATACTAGATATTTAATTTCA-AGTG--TAA GAAACAT TGGTGTTCAATTCGCAATTATTATT    |        |        |        |        |        |        |               |
| Candidatus Carsonella 135557 - 167442nt              | (2229)   | TTTTAATTGGAATTGATACTAGATATTTAATTTCA-AGTG--TAA GAAACAT TGGTGTTCAATTCGCAATTATTATT    |        |        |        |        |        |        |               |
| SARS-CoV-2 Reference Genome NC_045512.2              | (2061)   | CCTACATTACAGG TGGTGTGTTCAGTTGAC TTCGCAGTGGCTAACTAACATCT-----TTGCACTGT TTATG        |        |        |        |        |        |        |               |
|                                                      |          | Section 1792                                                                       |        |        |        |        |        |        |               |
|                                                      |          | (137908)                                                                           | 137908 | 137918 | 137929 | 137940 | 137951 | 137962 | 137973 137984 |
| Candidatus Carsonella ruddii strain BT chromosome... | (137859) | AAAAATATTGATAAATAAAAAATATTATTATTAAATATTTAAGATT TTTAAACAAATCAAAAAA-TGTATTAT-GATTAA  |        |        |        |        |        |        |               |
| Candidatus Carsonella 135557 - 167442nt              | (2303)   | AAAAATATTGATAAATAAAAAATATTATTATTAAATATTTAAGATT TTTAAACAAATCAAAAAA-TGTATTAT-GATTAA  |        |        |        |        |        |        |               |
| SARS-CoV-2 Reference Genome NC_045512.2              | (2130)   | AAAAAC-----TCAACCCCGTCCCT-TGATTGGCTTGAAAGAGAAGTTTAA GGAAGGTGTAGAGTTTCTTAGAGACGGT   |        |        |        |        |        |        |               |
|                                                      |          | Section 1793                                                                       |        |        |        |        |        |        |               |
|                                                      |          | (137985)                                                                           | 137985 | 137995 | 138006 | 138017 | 138028 | 138039 | 138050 138061 |
| Candidatus Carsonella ruddii strain BT chromosome... | (137934) | TATTTTATTAAATAAATTTAGGATGTAAAC TTGGTATTTT TAAAC TTTAAT TAAAAATAATTGTTTATT TACGAAT  |        |        |        |        |        |        |               |
| Candidatus Carsonella 135557 - 167442nt              | (2378)   | TATTTTATTAAATAAATTTAGGATGTAAAC TTGGTATTTT TAAAC TTTAAT TAAAAATAATTGTTTATT TACGAAT  |        |        |        |        |        |        |               |
| SARS-CoV-2 Reference Genome NC_045512.2              | (2201)   | TGGGAAATTGT TAAATTTA---TCTCAACCTGTGCTTGTGAAAT TGT CGGTGGACA--AATTGTCACCTGTGC AAAAG |        |        |        |        |        |        |               |
|                                                      |          | Section 1794                                                                       |        |        |        |        |        |        |               |
|                                                      |          | (138062)                                                                           | 138062 | 138072 | 138083 | 138094 | 138105 | 138116 | 138127 138138 |
| Candidatus Carsonella ruddii strain BT chromosome... | (138011) | TAAAAAAACAAACAAATGTAAAAATT-TTAAAAAAATAGATGGAGTATTTATTTT CGAATGGGCCAGGTAATCCTTT     |        |        |        |        |        |        |               |
| Candidatus Carsonella 135557 - 167442nt              | (2455)   | TAAAAAAACAAACAAATGTAAAAATT-TTAAAAAAATAGATGGAGTATTTATTTT CGAATGGGCCAGGTAATCCTTT     |        |        |        |        |        |        |               |
| SARS-CoV-2 Reference Genome NC_045512.2              | (2273)   | GAAATTAA GGAAGAGTGTTCAGACATTC TTTAA GCTTGTAATAAATTTTGGCTTGTGTGCTGACTCTATCAT TAT    |        |        |        |        |        |        |               |

## SARS-CoV-2 &amp; Bakterien.apr

|                                                      |          |                                                                                |        |        |        |        |        |        |               |
|------------------------------------------------------|----------|--------------------------------------------------------------------------------|--------|--------|--------|--------|--------|--------|---------------|
|                                                      |          | Section 1795                                                                   |        |        |        |        |        |        |               |
|                                                      |          | (138139)                                                                       | 138139 | 138149 | 138160 | 138171 | 138182 | 138193 | 138204 138215 |
| Candidatus Carsonella ruddii strain BT chromosome... | (138087) | TAAATATTCTAAATTTTATAATGTGATATTATTTTAAATATATATTAAAGTTCCAACCTATTAGTATTTGTTTAGGTC |        |        |        |        |        |        |               |
| Candidatus Carsonella 135557 - 167442nt              | (2531)   | TAAATATTCTAAATTTTATAATGTGATATTATTTTAAATATATATTAAAGTTCCAACCTATTAGTATTTGTTTAGGTC |        |        |        |        |        |        |               |
| SARS-CoV-2 Reference Genome NC_045512.2              | (2350)   | TGGTGGAGCTAAACCTTAAGCCTTGAATTTAGGTGAACATTTGTC---A---CGCCTCAAAGGGAATTGTACAG---  |        |        |        |        |        |        |               |
|                                                      |          | Section 1796                                                                   |        |        |        |        |        |        |               |
|                                                      |          | (138216)                                                                       | 138216 | 138226 | 138237 | 138248 | 138259 | 138270 | 138281 138292 |
| Candidatus Carsonella ruddii strain BT chromosome... | (138164) | ATCAAATATTAGGTATTTTAAATAAATTTTCATTTTCTTAACTTAAAAATGGACATCATGGTGTAAATCATCTATT   |        |        |        |        |        |        |               |
| Candidatus Carsonella 135557 - 167442nt              | (2608)   | ATCAAATATTAGGTATTTTAAATAAATTTTCATTTTCTTAACTTAAAAATGGACATCATGGTGTAAATCATCTATT   |        |        |        |        |        |        |               |
| SARS-CoV-2 Reference Genome NC_045512.2              | (2419)   | AAGGTGTGTTAAATCCAGAGAAAGAACGGCCATCTCATGCCTCTAAAAAGCCCAAAAG-----AAATATCTTCTTT   |        |        |        |        |        |        |               |
|                                                      |          | Section 1797                                                                   |        |        |        |        |        |        |               |
|                                                      |          | (138293)                                                                       | 138293 | 138303 | 138314 | 138325 | 138336 | 138347 | 138358 138369 |
| Candidatus Carsonella ruddii strain BT chromosome... | (138241) | TATAATAAATAATAATAAAAAAATTTTTATAAGTTTACAGAAATCATAAATTTTAAATTTAAAAAATAATAAAAAA   |        |        |        |        |        |        |               |
| Candidatus Carsonella 135557 - 167442nt              | (2685)   | TATAATAAATAATAATAAAAAAATTTTTATAAGTTTACAGAAATCATAAATTTTAAATTTAAAAAATAATAAAAAA   |        |        |        |        |        |        |               |
| SARS-CoV-2 Reference Genome NC_045512.2              | (2491)   | AGAGGGAGAAACACTTCCCACAG-----AGTGTTAACAGAGG---AAGTTGTCCTGAAAACTGGTGAATTTACAAACA |        |        |        |        |        |        |               |
|                                                      |          | Section 1798                                                                   |        |        |        |        |        |        |               |
|                                                      |          | (138370)                                                                       | 138370 | 138380 | 138391 | 138402 | 138413 | 138424 | 138435 138446 |
| Candidatus Carsonella ruddii strain BT chromosome... | (138318) | TTTTAATAAATCTTATTATTTCATTATTTGATAATACTATTCAAAGCATTAACTCGGTTTTTCAACCACTATTTAGTT |        |        |        |        |        |        |               |
| Candidatus Carsonella 135557 - 167442nt              | (2762)   | TTTTAATAAATCTTATTATTTCATTATTTGATAATACTATTCAAAGCATTAACTCGGTTTTTCAACCACTATTTAGTT |        |        |        |        |        |        |               |
| SARS-CoV-2 Reference Genome NC_045512.2              | (2561)   | TTAGAAACAA--CCTACTAGTGA--AGCTGTGAGCTC-----CATT-----GGTTGGTACACCAAGTTTGTA-TT    |        |        |        |        |        |        |               |
|                                                      |          | Section 1799                                                                   |        |        |        |        |        |        |               |
|                                                      |          | (138447)                                                                       | 138447 | 138457 | 138468 | 138479 | 138490 | 138501 | 138512 138523 |
| Candidatus Carsonella ruddii strain BT chromosome... | (138395) | TTCAGGGTCATCCTGAAGGATGTGCGGGTCCAAATGATTTAATTTTCATTTTAAATTTTATAATAAAATTTATGAA   |        |        |        |        |        |        |               |
| Candidatus Carsonella 135557 - 167442nt              | (2839)   | TTCAGGGTCATCCTGAAGGATGTGCGGGTCCAAATGATTTAATTTTCATTTTAAATTTTATAATAAAATTTATGAA   |        |        |        |        |        |        |               |
| SARS-CoV-2 Reference Genome NC_045512.2              | (2621)   | AACGGGCTTATGTGCTCGAATCAAAACACAGAAAGTACTGTGCCCTTGCACTTAATATGATGGTAACAAACAA      |        |        |        |        |        |        |               |
|                                                      |          | Section 1800                                                                   |        |        |        |        |        |        |               |
|                                                      |          | (138524)                                                                       | 138524 | 138534 | 138545 | 138556 | 138567 | 138578 | 138589 138600 |
| Candidatus Carsonella ruddii strain BT chromosome... | (138472) | TAAATTTTAGTAATAGGTGCAGGACCAATAAATTTGTTGGACAAGCT--TGCGAATTTGATTA---TTCAGGAACACA |        |        |        |        |        |        |               |
| Candidatus Carsonella 135557 - 167442nt              | (2916)   | TAAATTTTAGTAATAGGTGCAGGACCAATAAATTTGTTGGACAAGCT--TGCGAATTTGATTA---TTCAGGAACACA |        |        |        |        |        |        |               |
| SARS-CoV-2 Reference Genome NC_045512.2              | (2698)   | TACCTTCACACTCAAGGCAGTGCACCAACAAAGTTACTTTTGGTGAAGACACTGTGATAGAAGTCAAGGTTACA     |        |        |        |        |        |        |               |

## SARS-CoV-2 &amp; Bakterien.apr

| Section 1801                                         |          |               |               |                |                 |                    |                   |                  |                    |                   |       |
|------------------------------------------------------|----------|---------------|---------------|----------------|-----------------|--------------------|-------------------|------------------|--------------------|-------------------|-------|
|                                                      | (138601) | 138601        | 138611        | 138622         | 138633          | 138644             | 138655            | 138666           | 138677             |                   |       |
| Candidatus Carsonella ruddii strain BT chromosome... | (138544) | AGCTTGTAAA    | ----          | ACTTTAAAAGAA   | GAAAAATATCAT    | TGTTATTTTATT       | TAAATCTAATC       | ----             | CTGCA----ACAATT    |                   |       |
| Candidatus Carsonella 135557 - 167442nt              | (2988)   | AGCTTGTAAA    | ----          | ACTTTAAAAGAA   | GAAAAATATCAT    | TGTTATTTTATT       | TAAATCTAATC       | ----             | CTGCA----ACAATT    |                   |       |
| SARS-CoV-2 Reference Genome NC_045512.2              | (2775)   | AGAGTGTGAA    | TATC          | ACTTTTGAA      | CTTGATGAA       | AGGATTGATAA        | AGTACTTAAT        | GAGAA            | GTGCTCTGCTATACAGTT |                   |       |
| Section 1802                                         |          |               |               |                |                 |                    |                   |                  |                    |                   |       |
|                                                      | (138678) | 138678        | 138688        | 138699         | 138710          | 138721             | 138732            | 138743           | 138754             |                   |       |
| Candidatus Carsonella ruddii strain BT chromosome... | (138611) | ATGACTGATTAT  | GAAATAGCAGATT | CAATCTATATTGAA | ----            | CAAATAAA           | ----              | TAAAGATAAATTTAAT | AAAAATAATTTTA      |                   |       |
| Candidatus Carsonella 135557 - 167442nt              | (3055)   | ATGACTGATTAT  | GAAATAGCAGATT | CAATCTATATTGAA | ----            | CAAATAAA           | ----              | TAAAGATAAATTTAAT | AAAAATAATTTTA      |                   |       |
| SARS-CoV-2 Reference Genome NC_045512.2              | (2852)   | GAACCTCGGT    | ACAGAA        | GTAAATGAGTT    | TCGCTGTGTTG     | TGGCAGATGCTGT      | CATAA             | AAACCTT          | TGCAAACAGTATCTGA   |                   |       |
| Section 1803                                         |          |               |               |                |                 |                    |                   |                  |                    |                   |       |
|                                                      | (138755) | 138755        | 138765        | 138776         | 138787          | 138798             | 138809            | 138820           | 138831             |                   |       |
| Candidatus Carsonella ruddii strain BT chromosome... | (138686) | AT-AGAAAAACCA | AATTTTATT     | TTACCAACT      | TATGGGTGGT      | CAAACTGCTTT        | TAAATTTGATTTT     | TATGATTTTA       | ----               | TGAAT             |       |
| Candidatus Carsonella 135557 - 167442nt              | (3130)   | AT-AGAAAAACCA | AATTTTATT     | TTACCAACT      | TATGGGTGGT      | CAAACTGCTTT        | TAAATTTGATTTT     | TATGATTTTA       | ----               | TGAAT             |       |
| SARS-CoV-2 Reference Genome NC_045512.2              | (2929)   | ATTACTTAC     | ACCACTGGGC    | ATTGATTTAGAT   | GAGTGGAGT       | ATGGCTACAT         | ACTATCTATTT       | GATGAGT          | CTGG               | TGAGT             |       |
| Section 1804                                         |          |               |               |                |                 |                    |                   |                  |                    |                   |       |
|                                                      | (138832) | 138832        | 138842        | 138853         | 138864          | 138875             | 138886            | 138897           | 138908             |                   |       |
| Candidatus Carsonella ruddii strain BT chromosome... | (138761) | TCAAATTTT     | TATTTTC       | CAAAAGAAAA     | TATTTTAGGAATAAA | TAAAAAACATTAATTAAT | GCTGAAAGTAGAAATTC | ----             | ----               |                   |       |
| Candidatus Carsonella 135557 - 167442nt              | (3205)   | TCAAATTTT     | TATTTTC       | CAAAAGAAAA     | TATTTTAGGAATAAA | TAAAAAACATTAATTAAT | GCTGAAAGTAGAAATTC | ----             | ----               |                   |       |
| SARS-CoV-2 Reference Genome NC_045512.2              | (3006)   | TTAAATT       | GG--C         | TTCA           | CATATG----      | TATTGTT-----       | CTTCTACCCTCC      | AGATGAGGATGAA    | GAAGAA             | GGTG              |       |
| Section 1805                                         |          |               |               |                |                 |                    |                   |                  |                    |                   |       |
|                                                      | (138909) | 138909        | 138919        | 138930         | 138941          | 138952             | 138963            | 138974           | 138985             |                   |       |
| Candidatus Carsonella ruddii strain BT chromosome... | (138838) | TTTTTATAATTT  | AATAAAAAA     | ATTGGATTAA     | AATGTCCAGAT     | TCAACTAT           | TATAAATAATATTA    | ATAATAGTAACT     | ----               |                   |       |
| Candidatus Carsonella 135557 - 167442nt              | (3282)   | TTTTTATAATTT  | AATAAAAAA     | ATTGGATTAA     | AATGTCCAGAT     | TCAACTAT           | TATAAATAATATTA    | ATAATAGTAACT     | ----               |                   |       |
| SARS-CoV-2 Reference Genome NC_045512.2              | (3069)   | ATTGTG-----   | AA            | GAA            | GAA             | GAGTTTGA           | GCCATCAACTCA      | ATATGAGTATGGTA   | CTGAA              | GATGATTACCA---AGG |       |
| Section 1806                                         |          |               |               |                |                 |                    |                   |                  |                    |                   |       |
|                                                      | (138986) | 138986        | 138996        | 139007         | 139018          | 139029             | 139040            | 139051           | 139062             |                   |       |
| Candidatus Carsonella ruddii strain BT chromosome... | (138915) | TTAATCAT      | AAAATAGAATTT  | CCTTGTGTTAT    | AAGACCATCTTT    | TACATTAGGTGGACT    | AGGAAGTGGTATTG    | CATAT            | ----               |                   |       |
| Candidatus Carsonella 135557 - 167442nt              | (3359)   | TTAATCAT      | AAAATAGAATTT  | CCTTGTGTTAT    | AAGACCATCTTT    | TACATTAGGTGGACT    | AGGAAGTGGTATTG    | CATAT            | ----               |                   |       |
| SARS-CoV-2 Reference Genome NC_045512.2              | (3136)   | TAAACCTT----  | TG            | GAATTTGGT      | -GCCACTTCTG     | CTGCTGCTCTT        | CAACCTGA          | AGAA             | GAGCAAGAAG         | AAG-ATTG          | GTTAG |

## SARS-CoV-2 &amp; Bakterien.apr

|                                                      |          |  | Section 1807                             |                                                 |                             |                  |                 |                   |             |                     |
|------------------------------------------------------|----------|--|------------------------------------------|-------------------------------------------------|-----------------------------|------------------|-----------------|-------------------|-------------|---------------------|
|                                                      |          |  | (139063)                                 | 139063                                          | 139073                      | 139084           | 139095          | 139106            | 139117      | 139128 139139       |
| Candidatus Carsonella ruddii strain BT chromosome... | (138992) |  | AAATAAAAAA                               | ---                                             | AAATTTTTTT                  | TTTAATTATA       | AAAAAATGCTTT    | TTCTTTT           | TCAAACGAAAT | TACTATAGATAAAATCTA  |
| Candidatus Carsonella 135557 - 167442nt              | (3436)   |  | AAATAAAAAA                               | ---                                             | AAATTTTTTT                  | TTTAATTATA       | AAAAAATGCTTT    | TTCTTTT           | TCAAACGAAAT | TACTATAGATAAAATCTA  |
| SARS-CoV-2 Reference Genome NC_045512.2              | (3207)   |  | ATGATGATAGTC                             | AA                                              | CAAAC                       | TGTTGGTCAAC      | AA              | GACGCGAGT         | GAGGACAA    | TCAGAC--AACTACTATTC |
|                                                      |          |  | Section 1808                             |                                                 |                             |                  |                 |                   |             |                     |
|                                                      |          |  | (139140)                                 | 139140                                          | 139150                      | 139161           | 139172          | 139183            | 139194      | 139205 139216       |
| Candidatus Carsonella ruddii strain BT chromosome... | (139065) |  | TAATAGGATGGAAAG                          | -                                               | AATACGAATTAGAATT            | TATTAATAGATAAT   | TATTATAATATTATT | GTAATATGTTGTATTGA |             |                     |
| Candidatus Carsonella 135557 - 167442nt              | (3509)   |  | TAATAGGATGGAAAG                          | -                                               | AATACGAATTAGAATT            | TATTAATAGATAAT   | TATTATAATATTATT | GTAATATGTTGTATTGA |             |                     |
| SARS-CoV-2 Reference Genome NC_045512.2              | (3282)   |  | TTG-AGGTTCACCTC                          | AATTA                                           | GAGATGGAAC                  | TACACCAGTTGTTCAG | ---             | ACTATTGAAAGTGAATA | GTTT        | TAGTGG              |
|                                                      |          |  | Section 1809                             |                                                 |                             |                  |                 |                   |             |                     |
|                                                      |          |  | (139217)                                 | 139217                                          | 139227                      | 139238           | 139249          | 139260            | 139271      | 139282 139293       |
| Candidatus Carsonella ruddii strain BT chromosome... | (139141) |  | AAATTTAGATCCTGTGGAATTCATACAGGTGATTC      | TATTACATTAAACACCTTCACAAACTTTATCTGA              | ---                         | CAAAGA           |                 |                   |             |                     |
| Candidatus Carsonella 135557 - 167442nt              | (3585)   |  | AAATTTAGATCCTGTGGAATTCATACAGGTGATTC      | TATTACATTAAACACCTTCACAAACTTTATCTGA              | ---                         | CAAAGA           |                 |                   |             |                     |
| SARS-CoV-2 Reference Genome NC_045512.2              | (3355)   |  | TTATTTAAACCTTAC                          | TG-----ACA-----ATGTAT-ACATTAA-AAA               | TGCA                        | CAATTGTGGAA      | GAGCT           | AAAA              |             |                     |
|                                                      |          |  | Section 1810                             |                                                 |                             |                  |                 |                   |             |                     |
|                                                      |          |  | (139294)                                 | 139294                                          | 139304                      | 139315           | 139326          | 139337            | 139348      | 139359 139370       |
| Candidatus Carsonella ruddii strain BT chromosome... | (139216) |  | ATATGAAAACATAAGAGATTGTTCTTTTATTATTTTAA   | AATCTGTAGGTTTAAAA-GGAGGAGGTGC                   | AAAAATATACAA                |                  |                 |                   |             |                     |
| Candidatus Carsonella 135557 - 167442nt              | (3660)   |  | ATATGAAAACATAAGAGATTGTTCTTTTATTATTTTAA   | AATCTGTAGGTTTAAAA-GGAGGAGGTGC                   | AAAAATATACAA                |                  |                 |                   |             |                     |
| SARS-CoV-2 Reference Genome NC_045512.2              | (3417)   |  | AGGTAAAAACAACAGTGGTTGTTAA                | TGCA                                            | GCC-----AATGTTTACCCTTAAACAT | GGAGGAGGTGT---   | TGCAGGA         |                   |             |                     |
|                                                      |          |  | Section 1811                             |                                                 |                             |                  |                 |                   |             |                     |
|                                                      |          |  | (139371)                                 | 139371                                          | 139381                      | 139392           | 139403          | 139414            | 139425      | 139436 139447       |
| Candidatus Carsonella ruddii strain BT chromosome... | (139292) |  | TTTGCTATTAAATCCTATTAA                    | TGGAGATATAATTATAATAGAAATGAATCCTAG               | AATTTCTAGATCTGCTGCTTTAGC    |                  |                 |                   |             |                     |
| Candidatus Carsonella 135557 - 167442nt              | (3736)   |  | TTTGCTATTAAATCCTATTAA                    | TGGAGATATAATTATAATAGAAATGAATCCTAG               | AATTTCTAGATCTGCTGCTTTAGC    |                  |                 |                   |             |                     |
| SARS-CoV-2 Reference Genome NC_045512.2              | (3485)   |  | GCCTTAATAAAGGCTAAC                       | C-----AATGCCATGCAAGTGAATCTGATGATTAG-ATAGCTACTAA | TGGACC                      |                  |                 |                   |             |                     |
|                                                      |          |  | Section 1812                             |                                                 |                             |                  |                 |                   |             |                     |
|                                                      |          |  | (139448)                                 | 139448                                          | 139458                      | 139469           | 139480          | 139491            | 139502      | 139513 139524       |
| Candidatus Carsonella ruddii strain BT chromosome... | (139369) |  | TTCAAAAGCTACCGGATATCCTATAGCAAAAAATATCTAC | AAATTTATCTATTGGTTATAAATTTAATAAATTTACTTA         |                             |                  |                 |                   |             |                     |
| Candidatus Carsonella 135557 - 167442nt              | (3813)   |  | TTCAAAAGCTACCGGATATCCTATAGCAAAAAATATCTAC | AAATTTATCTATTGGTTATAAATTTAATAAATTTACTTA         |                             |                  |                 |                   |             |                     |
| SARS-CoV-2 Reference Genome NC_045512.2              | (3553)   |  | ACTTAAAGTGGGTGGTAGT                      | TGTGTTTAA                                       | GCGGAC--ACAA                | TCCTTG-CTAACAC   | TGCTT           | CATGT             | TGTCGGC     | CAA                 |

## SARS-CoV-2 &amp; Bakterien.apr

|                                                      |          |                                                                                      |        |        |        |        |        |        |        |              |
|------------------------------------------------------|----------|--------------------------------------------------------------------------------------|--------|--------|--------|--------|--------|--------|--------|--------------|
|                                                      | (139525) | 139525                                                                               | 139535 | 139546 | 139557 | 139568 | 139579 | 139590 | 139601 | Section 1813 |
| Candidatus Carsonella ruddii strain BT chromosome... | (139446) | ATGATATTACATGTGGAAATTTACCAGCTTCATTTGAACCGTCAATTGATTATATTGTTTTGAAATTTCTTAATTT         |        |        |        |        |        |        |        |              |
| Candidatus Carsonella 135557 - 167442nt              | (3890)   | ATGATATTACATGTGGAAATTTACCAGCTTCATTTGAACCGTCAATTGATTATATTGTTTTGAAATTTCTTAATTT         |        |        |        |        |        |        |        |              |
| SARS-CoV-2 Reference Genome NC_045512.2              | (3627)   | ATGTTAACAAGAAGGTGAAGACATTTC-ACTTCTTAAAGAG-----TGCTTATGAAAAATTTAAATCAGCACGAGGTT       |        |        |        |        |        |        |        |              |
|                                                      | (139602) | 139602                                                                               | 139612 | 139623 | 139634 | 139645 | 139656 | 139667 | 139678 | Section 1814 |
| Candidatus Carsonella ruddii strain BT chromosome... | (139523) | AATTTTGAAAAATTTAATAAGTATAAAATATTTTAAATACTGTAAATGAAATCTATCGGAGAAATTATGAGTTTAGG---     |        |        |        |        |        |        |        |              |
| Candidatus Carsonella 135557 - 167442nt              | (3967)   | AATTTTGAAAAATTTAATAAGTATAAAATATTTTAAATACTGTAAATGAAATCTATCGGAGAAATTATGAGTTTAGG---     |        |        |        |        |        |        |        |              |
| SARS-CoV-2 Reference Genome NC_045512.2              | (3695)   | CTACTTGCAACCATT-ATTATCAGCTGGTATTTT---GTTGC TGA CC-CTATAC-ATTCTTTAAGAGTTTGTGTAG       |        |        |        |        |        |        |        |              |
|                                                      | (139679) | 139679                                                                               | 139689 | 139700 | 139711 | 139722 | 139733 | 139744 | 139755 | Section 1815 |
| Candidatus Carsonella ruddii strain BT chromosome... | (139597) | ATCTTCTTTTCAAGAATCTTTTATAAAAGCAAATTTATTCAATAACACAGAACACAGAAACAA--TTCCTTCTTTTATAAA    |        |        |        |        |        |        |        |              |
| Candidatus Carsonella 135557 - 167442nt              | (4041)   | ATCTTCTTTTCAAGAATCTTTTATAAAAGCAAATTTATTCAATAACACAGAACACAGAAACAA--TTCCTTCTTTTATAAA    |        |        |        |        |        |        |        |              |
| SARS-CoV-2 Reference Genome NC_045512.2              | (3765)   | ATACTGFTCGACAAATGTCTACTTAGCTGTCTTTGATAAATCTCTATGACAAACTTGT TTC AAG CTTTTTGGAA        |        |        |        |        |        |        |        |              |
|                                                      | (139756) | 139756                                                                               | 139766 | 139777 | 139788 | 139799 | 139810 | 139821 | 139832 | Section 1816 |
| Candidatus Carsonella ruddii strain BT chromosome... | (139672) | GCGAAAATATTATAATAATTTATAAAATTTAAAAATATTAAAAAAATATTAAATCCCTAATAGTAAAAGAATATTTTATA     |        |        |        |        |        |        |        |              |
| Candidatus Carsonella 135557 - 167442nt              | (4116)   | GCGAAAATATTATAATAATTTATAAAATTTAAAAATATTAAAAAAATATTAAATCCCTAATAGTAAAAGAATATTTTATA     |        |        |        |        |        |        |        |              |
| SARS-CoV-2 Reference Genome NC_045512.2              | (3842)   | ATGAAAGAGTGAAAGGCAAGGTGAA---CAAAA GATCGCTGAGATTCC TAAAGAGGAA-- GTTAA GCC ATTTATAACT  |        |        |        |        |        |        |        |              |
|                                                      | (139833) | 139833                                                                               | 139843 | 139854 | 139865 | 139876 | 139887 | 139898 | 139909 | Section 1817 |
| Candidatus Carsonella ruddii strain BT chromosome... | (139749) | TAA TAGATGCTTTTAGATTAAATTTTAA CAT AAAATTAATTTTTGTTTATCAAAAATTGATCCTTGGTTTTGTAT       |        |        |        |        |        |        |        |              |
| Candidatus Carsonella 135557 - 167442nt              | (4193)   | TAA TAGATGCTTTTAGATTAAATTTTAA CAT AAAATTAATTTTTGTTTATCAAAAATTGATCCTTGGTTTTGTAT       |        |        |        |        |        |        |        |              |
| SARS-CoV-2 Reference Genome NC_045512.2              | (3914)   | GAAAGTAAAGCTTCAGTTGAA CAGAG AA AACAA GATGA --- TAA -GAAAATCAAA GC TTG ----- TGTTGAAG |        |        |        |        |        |        |        |              |
|                                                      | (139910) | 139910                                                                               | 139920 | 139931 | 139942 | 139953 | 139964 | 139975 | 139986 | Section 1818 |
| Candidatus Carsonella ruddii strain BT chromosome... | (139826) | TATATAAAAGAAATTTATTGATTATGAAAAAAATTTTATTATTATTATAAAATAAAAAAAAAAATTATATTAAAACAAAT     |        |        |        |        |        |        |        |              |
| Candidatus Carsonella 135557 - 167442nt              | (4270)   | TATATAAAAGAAATTTATTGATTATGAAAAAAATTTTATTATTATTATAAAATAAAAAAAAAAATTATATTAAAACAAAT     |        |        |        |        |        |        |        |              |
| SARS-CoV-2 Reference Genome NC_045512.2              | (3978)   | AAGTACAA CAAC TC-----TGGAAGAACTAAGTTCCTCACAGAAA- ACTTGTTACTTTATATTGACATTAAAT         |        |        |        |        |        |        |        |              |

## SARS-CoV-2 &amp; Bakterien.apr

|                                                      |          | Section 1819 |                                       |                                 |                                      |                         |                    |                  |                     |
|------------------------------------------------------|----------|--------------|---------------------------------------|---------------------------------|--------------------------------------|-------------------------|--------------------|------------------|---------------------|
|                                                      |          | (139987)     | 139987                                | 139997                          | 140008                               | 140019                  | 140030             | 140041           | 140052 140063       |
| Candidatus Carsonella ruddii strain BT chromosome... | (139903) |              | AG-ATTCTTGTTC                         | TAATGAATTTGTTAGTC               | CAACTTCCTTATTTATATTCTTCTAAT          | TATTTTTATAATGAAATTAGA   |                    |                  |                     |
| Candidatus Carsonella 135557 - 167442nt              | (4347)   |              | AG-ATTCTTGTTC                         | TAATGAATTTGTTAGTC               | CAACTTCCTTATTTATATTCTTCTAAT          | TATTTTTATAATGAAATTAGA   |                    |                  |                     |
| SARS-CoV-2 Reference Genome NC_045512.2              | (4046)   |              | GGC                                   | AATCTTCA                        | TCCA--GATTC                          | TGCCAC                  | TC---TTGTTAGT      | GACATTG---ACATCA | CTTTCTTAAAGAAA---GA |
|                                                      |          | Section 1820 |                                       |                                 |                                      |                         |                    |                  |                     |
|                                                      |          | (140064)     | 140064                                | 140074                          | 140085                               | 140096                  | 140107             | 140118           | 140129 140140       |
| Candidatus Carsonella ruddii strain BT chromosome... | (139979) |              | TATAC                                 | TATTAATAAAAAAATATTAATTTTAGGAAGT | GTGTTTAAATAGAAATAGG                  | ---ACAAAGTATAGAAATTGATT |                    |                  |                     |
| Candidatus Carsonella 135557 - 167442nt              | (4423)   |              | TATAC                                 | TATTAATAAAAAAATATTAATTTTAGGAAGT | GTGTTTAAATAGAAATAGG                  | ---ACAAAGTATAGAAATTGATT |                    |                  |                     |
| SARS-CoV-2 Reference Genome NC_045512.2              | (4111)   |              | TGCTC                                 | ATATATA                         | GTGGGTGATGTTGTTC                     | AAGAGGGT                | GTTTTAACTGCTGTGG   | TTATACCTACTA     | AAAGGC              |
|                                                      |          | Section 1821 |                                       |                                 |                                      |                         |                    |                  |                     |
|                                                      |          | (140141)     | 140141                                | 140151                          | 140162                               | 140173                  | 140184             | 140195           | 140206 140217       |
| Candidatus Carsonella ruddii strain BT chromosome... | (140052) |              | ACTGTTGTACAAAAGCT                     | -GCTAAATTTTATTAAAAAAATAGG       | TTTTGATTCAATAATCATAAATTGT            | TAATCCAGAAAC            |                    |                  |                     |
| Candidatus Carsonella 135557 - 167442nt              | (4496)   |              | ACTGTTGTACAAAAGCT                     | -GCTAAATTTTATTAAAAAAATAGG       | TTTTGATTCAATAATCATAAATTGT            | TAATCCAGAAAC            |                    |                  |                     |
| SARS-CoV-2 Reference Genome NC_045512.2              | (4188)   |              | GCAC                                  | TACTG-AAA                       | TGCTAGCG                             | AAAGC                   | TTTGAGAAAA         | GT--GCCAAC       | AGCAAT              |
|                                                      |          | Section 1822 |                                       |                                 |                                      |                         |                    |                  |                     |
|                                                      |          | (140218)     | 140218                                | 140228                          | 140239                               | 140250                  | 140261             | 140272           | 140283 140294       |
| Candidatus Carsonella ruddii strain BT chromosome... | (140128) |              | AGTTTCTACAGATTATGATTCTAGTT            | ----CACAAATTATTTT               | TGACCCCTATTACTATTACTTATTTAAATAAATTTA |                         |                    |                  |                     |
| Candidatus Carsonella 135557 - 167442nt              | (4572)   |              | AGTTTCTACAGATTATGATTCTAGTT            | ----CACAAATTATTTT               | TGACCCCTATTACTATTACTTATTTAAATAAATTTA |                         |                    |                  |                     |
| SARS-CoV-2 Reference Genome NC_045512.2              | (4260)   |              | AGGG                                  | TTTAAATGG                       | TTACACTGTAG                          | AGGAGG                  | CAAGACAGT          | GCTTAA           | AAAGTGTA            |
|                                                      |          | Section 1823 |                                       |                                 |                                      |                         |                    |                  |                     |
|                                                      |          | (140295)     | 140295                                | 140305                          | 140316                               | 140327                  | 140338             | 140349           | 140360 140371       |
| Candidatus Carsonella ruddii strain BT chromosome... | (140201) |              | ATTTTATAATTTTAAACCAATTTTAAATAATTGTC   | --AATTAGGTGGTC                  | -AATTACGTTTAAATATTTAAGATTTAA         |                         |                    |                  |                     |
| Candidatus Carsonella 135557 - 167442nt              | (4645)   |              | ATTTTATAATTTTAAACCAATTTTAAATAATTGTC   | --AATTAGGTGGTC                  | -AATTACGTTTAAATATTTAAGATTTAA         |                         |                    |                  |                     |
| SARS-CoV-2 Reference Genome NC_045512.2              | (4336)   |              | ATC                                   | TATTATCTCTAA                    | TGAGAAGCAAGAA                        | ATTCTTGGAACTGTTTCTTGG   | AATTTGGGAGAAATGCTT | GCACATGC         | AG                  |
|                                                      |          | Section 1824 |                                       |                                 |                                      |                         |                    |                  |                     |
|                                                      |          | (140372)     | 140372                                | 140382                          | 140393                               | 140404                  | 140415             | 140426           | 140437 140448       |
| Candidatus Carsonella ruddii strain BT chromosome... | (140275) |              | TAATAATAAAAAATAATAATAAAATTTTAGGAATAAA | TAAAA                           | TTAATAATAAATATTTGTGGATC              | -TAAAAATAAAATTT         |                    |                  |                     |
| Candidatus Carsonella 135557 - 167442nt              | (4719)   |              | TAATAATAAAAAATAATAATAAAATTTTAGGAATAAA | TAAAA                           | TTAATAATAAATATTTGTGGATC              | -TAAAAATAAAATTT         |                    |                  |                     |
| SARS-CoV-2 Reference Genome NC_045512.2              | (4413)   |              | AAGAAA                                | CACGC                           | AAATTAAT                             | GCCTGTCTGTGTGG          | AACTAAAGCC         | ATAGTTTC         | ACTATACAGCGT        |



SARS-CoV-2 & Bakterien.apr

|                                                      |          |                                                                                |              |        |        |        |        |        |        |  |
|------------------------------------------------------|----------|--------------------------------------------------------------------------------|--------------|--------|--------|--------|--------|--------|--------|--|
|                                                      |          |                                                                                | Section 1825 |        |        |        |        |        |        |  |
|                                                      | (140449) | 140449                                                                         | 140459       | 140470 | 140481 | 140492 | 140503 | 140514 | 140525 |  |
| Candidatus Carsonella ruddii strain BT chromosome... | (140351) | AATAAAATATTAAAAATATAAAATTTAAACATTTTAAATAATTTTCTAAAAATATAAATGATTTAATATTTTA      |              |        |        |        |        |        |        |  |
| Candidatus Carsonella 135557 - 167442nt              | (4795)   | AATAAAATATTAAAAATATAAAATTTAAACATTTTAAATAATTTTCTAAAAATATAAATGATTTAATATTTTA      |              |        |        |        |        |        |        |  |
| SARS-CoV-2 Reference Genome NC_045512.2              | (4490)   | ATTAAAAATACAGAGGGGTGGTGGATTATGGTGCATGATTTTACCTTTACCCAGTAAAAACAACGTGATGCGTCACT  |              |        |        |        |        |        |        |  |
|                                                      |          |                                                                                | Section 1826 |        |        |        |        |        |        |  |
|                                                      | (140526) | 140526                                                                         | 140536       | 140547 | 140558 | 140569 | 140580 | 140591 | 140602 |  |
| Candidatus Carsonella ruddii strain BT chromosome... | (140428) | TTCAAATATAATTAATAAACCTATAATATTAAAGACCATCATATATTATGGAGGAAGCAATATTAAATATATTAATAA |              |        |        |        |        |        |        |  |
| Candidatus Carsonella 135557 - 167442nt              | (4872)   | TTCAAATATAATTAATAAACCTATAATATTAAAGACCATCATATATTATGGAGGAAGCAATATTAAATATATTAATAA |              |        |        |        |        |        |        |  |
| SARS-CoV-2 Reference Genome NC_045512.2              | (4567)   | TATCAAACACCTTAAACGATC---TAA-ATGAAACTCTTGTACA--ATGCCACTTGCTATGT-AAACATGGCTTA    |              |        |        |        |        |        |        |  |
|                                                      |          |                                                                                | Section 1827 |        |        |        |        |        |        |  |
|                                                      | (140603) | 140603                                                                         | 140613       | 140624 | 140635 | 140646 | 140657 | 140668 | 140679 |  |
| Candidatus Carsonella ruddii strain BT chromosome... | (140505) | ACAATA-ATGATTTAATAAAAAATATATAAATAATTTTAAAAAATAATTTTATATATTTTATAGAAAAATTTTAA    |              |        |        |        |        |        |        |  |
| Candidatus Carsonella 135557 - 167442nt              | (4949)   | ACAATA-ATGATTTAATAAAAAATATATAAATAATTTTAAAAAATAATTTTATATATTTTATAGAAAAATTTTAA    |              |        |        |        |        |        |        |  |
| SARS-CoV-2 Reference Genome NC_045512.2              | (4637)   | AATTGGGAAGAAGCTGCTCGGTATATGAGATCTCTCAAAATGCCCAGCTACAGTTTCTGTTCTTCACTCTGCTG-    |              |        |        |        |        |        |        |  |
|                                                      |          |                                                                                | Section 1828 |        |        |        |        |        |        |  |
|                                                      | (140680) | 140680                                                                         | 140690       | 140701 | 140712 | 140723 | 140734 | 140745 | 140756 |  |
| Candidatus Carsonella ruddii strain BT chromosome... | (140580) | TTAATGCAAAAGAATTTGATTTAGATTTATTAGTAGAAAAAGGAAAAAATAATAAATTTTATATAATTGAACATATA  |              |        |        |        |        |        |        |  |
| Candidatus Carsonella 135557 - 167442nt              | (5024)   | TTAATGCAAAAGAATTTGATTTAGATTTATTAGTAGAAAAAGGAAAAAATAATAAATTTTATATAATTGAACATATA  |              |        |        |        |        |        |        |  |
| SARS-CoV-2 Reference Genome NC_045512.2              | (4713)   | TTACAGCGTATAATGGTTATCTT-ACCTCTCTCTAAAA---CACTGAAAGAACATTT---ATTGAACACCATC      |              |        |        |        |        |        |        |  |
|                                                      |          |                                                                                | Section 1829 |        |        |        |        |        |        |  |
|                                                      | (140757) | 140757                                                                         | 140767       | 140778 | 140789 | 140800 | 140811 | 140822 | 140833 |  |
| Candidatus Carsonella ruddii strain BT chromosome... | (140657) | GAAATGCTGGTATACATTCAGGA-GATTCCTATGATGATTTATCTACTTTTACTATTAATAAAAAATATTAAAAAGA  |              |        |        |        |        |        |        |  |
| Candidatus Carsonella 135557 - 167442nt              | (5101)   | GAAATGCTGGTATACATTCAGGA-GATTCCTATGATGATTTATCTACTTTTACTATTAATAAAAAATATTAAAAAGA  |              |        |        |        |        |        |        |  |
| SARS-CoV-2 Reference Genome NC_045512.2              | (4781)   | TCACTTGCTGGTTCCCTATAAAGATTGTCCTATTCFGACAAATC-TACACA-ACTAGGTATAGAAATTCCTTAAGAGA |              |        |        |        |        |        |        |  |
|                                                      |          |                                                                                | Section 1830 |        |        |        |        |        |        |  |
|                                                      | (140834) | 140834                                                                         | 140844       | 140855 | 140866 | 140877 | 140888 | 140899 | 140910 |  |
| Candidatus Carsonella ruddii strain BT chromosome... | (140733) | AA--ATTATATTTTATATATCTTTAATA-TGTTATAA-ATTAAAAATTAATGG---AATTATAAATTTTCAAATTTG  |              |        |        |        |        |        |        |  |
| Candidatus Carsonella 135557 - 167442nt              | (5177)   | AA--ATTATATTTTATATATCTTTAATA-TGTTATAA-ATTAAAAATTAATGG---AATTATAAATTTTCAAATTTG  |              |        |        |        |        |        |        |  |
| SARS-CoV-2 Reference Genome NC_045512.2              | (4856)   | GGTGATAAAGTGATATTAACATAGTAATCCATCCACATTCCACCTAGATGGTGAAGTTATCACTTTGACA---      |              |        |        |        |        |        |        |  |

|                                                      |          |              |             |               |                |               |               |                |                                            |
|------------------------------------------------------|----------|--------------|-------------|---------------|----------------|---------------|---------------|----------------|--------------------------------------------|
|                                                      |          | Section 1831 |             |               |                |               |               |                |                                            |
|                                                      |          | (140911)     | 140911      | 140921        | 140932         | 140943        | 140954        | 140965         | 140976 140987                              |
| Candidatus Carsonella ruddii strain BT chromosome... | (140803) |              | TTTTAAAAA   | TTTTATATA     | ATAGAA         | TGCAATCCT     | AGAGTT        | CAAGAACA       | TACCATTTGTTTCTAAATCTTCTA                   |
| Candidatus Carsonella 135557 - 167442nt              | (5247)   |              | TTTTAAAAA   | TTTTATATA     | ATAGAA         | TGCAATCCT     | AGAGTT        | CAAGAACA       | TACCATTTGTTTCTAAATCTTCTA                   |
| SARS-CoV-2 Reference Genome NC_045512.2              | (4930)   |              | TCTTAA      | GACACTTC      | TTTTCTT        | TGAGAGAA      | GTGAGGAC      | CT--A--        | TTAAGGTGTTTACAAACAGTAGACAACAT---TA         |
|                                                      |          | Section 1832 |             |               |                |               |               |                |                                            |
|                                                      |          | (140988)     | 140988      | 140998        | 141009         | 141020        | 141031        | 141042         | 141053 141064                              |
| Candidatus Carsonella ruddii strain BT chromosome... | (140880) |              | AATTTCTAT   | GATATATA      | ATTATATATCAAT  | TTTTTTAGGAT   | TATAATATTTT   | TTATAAAGAAAAA  | TTAATAATTTT                                |
| Candidatus Carsonella 135557 - 167442nt              | (5324)   |              | AATTTCTAT   | GATATATA      | ATTATATATCAAT  | TTTTTTAGGAT   | TATAATATTTT   | TTATAAAGAAAAA  | TTAATAATTTT                                |
| SARS-CoV-2 Reference Genome NC_045512.2              | (4998)   |              | ACCTC       | CACACG        | CAAGT          | TGTGG         | ACATG         | TCAATGACAT     | TATGGACA--ACAGTTTGGTCCAACTTATTTGGATGGAGCTG |
|                                                      |          | Section 1833 |             |               |                |               |               |                |                                            |
|                                                      |          | (141065)     | 141065      | 141075        | 141086         | 141097        | 141108        | 141119         | 141130 141141                              |
| Candidatus Carsonella ruddii strain BT chromosome... | (140957) |              | TATTTTTT    | TAAAAGAATCTAT | TATTACCAACAAAT | AAATTTAAAA    | TAGGTTTAT     | TATCACCTGAA    | -ATGAAA-TCTAC-                             |
| Candidatus Carsonella 135557 - 167442nt              | (5401)   |              | TATTTTTT    | TAAAAGAATCTAT | TATTACCAACAAAT | AAATTTAAAA    | TAGGTTTAT     | TATCACCTGAA    | -ATGAAA-TCTAC-                             |
| SARS-CoV-2 Reference Genome NC_045512.2              | (5073)   |              | ATGTT       | ACAAAA        | TAAACC         | TCA           | TAAATT        | -CACATGAA      | GGTAAAACATTTATGTTTACCTAATGATGACCTCTACG     |
|                                                      |          | Section 1834 |             |               |                |               |               |                |                                            |
|                                                      |          | (141142)     | 141142      | 141152        | 141163         | 141174        | 141185        | 141196         | 141207 141218                              |
| Candidatus Carsonella ruddii strain BT chromosome... | (141031) |              | TGGAGAACTAT | -GAGTATAGGG   | CTAACAAAT      | CAAGAATGTTTTA | -----         | AAAAATCT       | CAAAATATAAAATCAAAAA                        |
| Candidatus Carsonella 135557 - 167442nt              | (5475)   |              | TGGAGAACTAT | -GAGTATAGGG   | CTAACAAAT      | CAAGAATGTTTTA | -----         | AAAAATCT       | CAAAATATAAAATCAAAAA                        |
| SARS-CoV-2 Reference Genome NC_045512.2              | (5149)   |              | TGTTGA      | GGCTTT        | TGAGTA         | CTAC-CAC      | ACAACTGATCCTA | GTTTTCTGGGT    | AGGTACATGTCAGCATTAAATCACACT                |
|                                                      |          | Section 1835 |             |               |                |               |               |                |                                            |
|                                                      |          | (141219)     | 141219      | 141229        | 141240         | 141251        | 141262        | 141273         | 141284 141295                              |
| Candidatus Carsonella ruddii strain BT chromosome... | (141102) |              | CAATATTT    | TATTAATAC     | TAAAAA         | ---AAT--      | TTTTAGAT      | TATTAAAT       | ATTTAAAAAATATAAAAAATATTAAACTA              |
| Candidatus Carsonella 135557 - 167442nt              | (5546)   |              | CAATATTT    | TATTAATAC     | TAAAAA         | ---AAT--      | TTTTAGAT      | TATTAAAT       | ATTTAAAAAATATAAAAAATATTAAACTA              |
| SARS-CoV-2 Reference Genome NC_045512.2              | (5225)   |              | -AAA        | AAGT          | GGA            | AATAC         | CCACAA        | GTTAAT         | GGTTTAACTCTATTAAATGGGCAAGATAACA            |
|                                                      |          | Section 1836 |             |               |                |               |               |                |                                            |
|                                                      |          | (141296)     | 141296      | 141306        | 141317         | 141328        | 141339        | 141350         | 141361 141372                              |
| Candidatus Carsonella ruddii strain BT chromosome... | (141174) |              | -ATAGTT     | TTTTA         | -TAAAAA        | AATTTTTT      | TGATCCTTCAT   | TTTGTTCATATGTT | TAGTAAAAAATAATACATGTA                      |
| Candidatus Carsonella 135557 - 167442nt              | (5618)   |              | -ATAGTT     | TTTTA         | -TAAAAA        | AATTTTTT      | TGATCCTTCAT   | TTTGTTCATATGTT | TAGTAAAAAATAATACATGTA                      |
| SARS-CoV-2 Reference Genome NC_045512.2              | (5301)   |              | CATT        | GTTA          | ACCTCC         | AA            | CAAT          | AGAGTTGA       | -----AGTTTAA                               |

## SARS-CoV-2 &amp; Bakterien.apr

|                                                      |          |                                                                                    |              |        |        |        |        |        |        |  |
|------------------------------------------------------|----------|------------------------------------------------------------------------------------|--------------|--------|--------|--------|--------|--------|--------|--|
|                                                      |          |                                                                                    | Section 1837 |        |        |        |        |        |        |  |
|                                                      | (141373) | 141373                                                                             | 141383       | 141394 | 141405 | 141416 | 141427 | 141438 | 141449 |  |
| Candidatus Carsonella ruddii strain BT chromosome... | (141249) | TTTTATCAAAATAAAATAAATAATATTTGTAATAATTATACTTATTCAACTA-ATTCATCCATTAAATTATTTTATC      |              |        |        |        |        |        |        |  |
| Candidatus Carsonella 135557 - 167442nt              | (5693)   | TTTTATCAAAATAAAATAAATAATATTTGTAATAATTATACTTATTCAACTA-ATTCATCCATTAAATTATTTTATC      |              |        |        |        |        |        |        |  |
| SARS-CoV-2 Reference Genome NC_045512.2              | (5373)   | GGG---CTGGTGGAAGCTGCTAACTTTTGTGC-ACCTTAT-CTTAGCCTACTGTATAAAGACAGTAGGTGAGTTAGGTG    |              |        |        |        |        |        |        |  |
|                                                      |          |                                                                                    | Section 1838 |        |        |        |        |        |        |  |
|                                                      | (141450) | 141450                                                                             | 141460       | 141471 | 141482 | 141493 | 141504 | 141515 | 141526 |  |
| Candidatus Carsonella ruddii strain BT chromosome... | (141325) | ATCTTTTAATAAAAAATTA-----TTATATAATAAGAAAAATAAATAATATTAAACCGAAATGGTGAAA-TGGTATA      |              |        |        |        |        |        |        |  |
| Candidatus Carsonella 135557 - 167442nt              | (5769)   | ATCTTTTAATAAAAAATTA-----TTATATAATAAGAAAAATAAATAATATTAAACCGAAATGGTGAAA-TGGTATA      |              |        |        |        |        |        |        |  |
| SARS-CoV-2 Reference Genome NC_045512.2              | (5445)   | ATGTTAGAGAAACAAATGAGTTTACTTTGTTTCAACATGCCAATTTAGATTCTTGCAGAAAGAG-TCTTGAAACGTGGTGTG |              |        |        |        |        |        |        |  |
|                                                      |          |                                                                                    | Section 1839 |        |        |        |        |        |        |  |
|                                                      | (141527) | 141527                                                                             | 141537       | 141548 | 141559 | 141570 | 141581 | 141592 | 141603 |  |
| Candidatus Carsonella ruddii strain BT chromosome... | (141396) | CACCTTTACTTTGAGAGAGTAATGGATTTTTTATCCATACGGGTTCAATTCCCGTTTTCGGTAAAAAAAATATGAAAA     |              |        |        |        |        |        |        |  |
| Candidatus Carsonella 135557 - 167442nt              | (5840)   | CACCTTTACTTTGAGAGAGTAATGGATTTTTTATCCATACGGGTTCAATTCCCGTTTTCGGTAAAAAAAATATGAAAA     |              |        |        |        |        |        |        |  |
| SARS-CoV-2 Reference Genome NC_045512.2              | (5521)   | TAAA--ACTTGTGGACAACAGCAGACA-----ACCCCTAAGGGTGTAGAAGCTGTTAT--GTACA-----TGGGCACA     |              |        |        |        |        |        |        |  |
|                                                      |          |                                                                                    | Section 1840 |        |        |        |        |        |        |  |
|                                                      | (141604) | 141604                                                                             | 141614       | 141625 | 141636 | 141647 | 141658 | 141669 | 141680 |  |
| Candidatus Carsonella ruddii strain BT chromosome... | (141473) | ATTTTTATATCAATGAGATAAATTCTATTAAAGAAATATCTGAAATAATAGGAATAAGCAAATAGATTTTAATAAAA      |              |        |        |        |        |        |        |  |
| Candidatus Carsonella 135557 - 167442nt              | (5917)   | ATTTTTATATCAATGAGATAAATTCTATTAAAGAAATATCTGAAATAATAGGAATAAGCAAATAGATTTTAATAAAA      |              |        |        |        |        |        |        |  |
| SARS-CoV-2 Reference Genome NC_045512.2              | (5585)   | CTTTC-T-T-----ATGA-ACAATT--TAAGAAAGG-TGTTTCAGATACCTTG----TACGTGTGGTAACAAGCTACAA    |              |        |        |        |        |        |        |  |
|                                                      |          |                                                                                    | Section 1841 |        |        |        |        |        |        |  |
|                                                      | (141681) | 141681                                                                             | 141691       | 141702 | 141713 | 141724 | 141735 | 141746 | 141757 |  |
| Candidatus Carsonella ruddii strain BT chromosome... | (141550) | AATTTTTTTTTTTAA-AGGTATAATAAATTAAAAAAATGAATTTTTTAAATTTTCAACAGTAAAGATTTATG-TAAA      |              |        |        |        |        |        |        |  |
| Candidatus Carsonella 135557 - 167442nt              | (5994)   | AATTTTTTTTTTTAA-AGGTATAATAAATTAAAAAAATGAATTTTTTAAATTTTCAACAGTAAAGATTTATG-TAAA      |              |        |        |        |        |        |        |  |
| SARS-CoV-2 Reference Genome NC_045512.2              | (5649)   | AATATCTAGTACAAACAGGAGTCACTTTTGTTATGATGTCAGCACCACTTGCAGTATGAACTTAAGCATGGTACA        |              |        |        |        |        |        |        |  |
|                                                      |          |                                                                                    | Section 1842 |        |        |        |        |        |        |  |
|                                                      | (141758) | 141758                                                                             | 141768       | 141779 | 141790 | 141801 | 141812 | 141823 | 141834 |  |
| Candidatus Carsonella ruddii strain BT chromosome... | (141625) | AATATTTTTTAAATA-TAAATATTTTAAAAA--AAGAAAAACAAATTTTAAATAATACCATCTTTAAATAATTTTTT      |              |        |        |        |        |        |        |  |
| Candidatus Carsonella 135557 - 167442nt              | (6069)   | AATATTTTTTAAATA-TAAATATTTTAAAAA--AAGAAAAACAAATTTTAAATAATACCATCTTTAAATAATTTTTT      |              |        |        |        |        |        |        |  |
| SARS-CoV-2 Reference Genome NC_045512.2              | (5726)   | TTTACTTGTGCTAGTGAAGTACACTGGTAAATACCAAGTGTGGTCACTATAAACATATAACTCTTAAGAAACCTTTGTA    |              |        |        |        |        |        |        |  |

SARS-CoV-2 & Bakterien.apr

|                                                      |          |                                                                                  |        |        |        |        |        |        |        |        |  |
|------------------------------------------------------|----------|----------------------------------------------------------------------------------|--------|--------|--------|--------|--------|--------|--------|--------|--|
|                                                      |          | Section 1843                                                                     |        |        |        |        |        |        |        |        |  |
|                                                      |          | (141835)                                                                         | 141835 | 141845 | 141856 | 141867 | 141878 | 141889 | 141900 | 141911 |  |
| Candidatus Carsonella ruddii strain BT chromosome... | (141699) | TTATATTTCTATAAAGGAAATGTTAATTC-TGGTAAACAACTTTAATAGATTTTATATTTAAAAAAAATATTTCT      |        |        |        |        |        |        |        |        |  |
| Candidatus Carsonella 135557 - 167442nt              | (6143)   | TTATATTTCTATAAAGGAAATGTTAATTC-TGGTAAACAACTTTAATAGATTTTATATTTAAAAAAAATATTTCT      |        |        |        |        |        |        |        |        |  |
| SARS-CoV-2 Reference Genome NC_045512.2              | (5803)   | TTGCATAGACGGTGCTTTACTTACAAAGTCTCAGAAATACAAAGGTCCATTACGGATGTTTCTTACAAAGAAACA      |        |        |        |        |        |        |        |        |  |
|                                                      |          | Section 1844                                                                     |        |        |        |        |        |        |        |        |  |
|                                                      |          | (141912)                                                                         | 141912 | 141922 | 141933 | 141944 | 141955 | 141966 | 141977 | 141988 |  |
| Candidatus Carsonella ruddii strain BT chromosome... | (141775) | TTTAATGAATTTGGTAAAATTACACAATTTGTTCAATTTTGAAACTTTTATTAATAAAAAAATATTTTATTTT        |        |        |        |        |        |        |        |        |  |
| Candidatus Carsonella 135557 - 167442nt              | (6219)   | TTTAATGAATTTGGTAAAATTACACAATTTGTTCAATTTTGAAACTTTTATTAATAAAAAAATATTTTATTTT        |        |        |        |        |        |        |        |        |  |
| SARS-CoV-2 Reference Genome NC_045512.2              | (5880)   | GTTACACAAACA----ACCATAAACAGTTACTTATAAATTGGATGGTGTGTGTTGTACAGAGAAATGACCCTAAGTT    |        |        |        |        |        |        |        |        |  |
|                                                      |          | Section 1845                                                                     |        |        |        |        |        |        |        |        |  |
|                                                      |          | (141989)                                                                         | 141989 | 141999 | 142010 | 142021 | 142032 | 142043 | 142054 | 142065 |  |
| Candidatus Carsonella ruddii strain BT chromosome... | (141852) | CGATTTACCTGGTCACAAAATATTTAATAAAAAATAAATAAACTTTTATTAAATAAGTAAT-ATTTTATTTT-TAAT    |        |        |        |        |        |        |        |        |  |
| Candidatus Carsonella 135557 - 167442nt              | (6296)   | CGATTTACCTGGTCACAAAATATTTAATAAAAAATAAATAAACTTTTATTAAATAAGTAAT-ATTTTATTTT-TAAT    |        |        |        |        |        |        |        |        |  |
| SARS-CoV-2 Reference Genome NC_045512.2              | (5953)   | GGA-----CAA-----TTATTTATAGAAAGACAAATCTTATTTCACAGAGCAACCAATTGATCTTGTAAC           |        |        |        |        |        |        |        |        |  |
|                                                      |          | Section 1846                                                                     |        |        |        |        |        |        |        |        |  |
|                                                      |          | (142066)                                                                         | 142066 | 142076 | 142087 | 142098 | 142109 | 142120 | 142131 | 142142 |  |
| Candidatus Carsonella ruddii strain BT chromosome... | (141927) | AAT-----ATCTTCAGAAATCAGATAATGATAATGTATATGATAATATATTAGAA-ATAAAAAAACAAAATAATATT    |        |        |        |        |        |        |        |        |  |
| Candidatus Carsonella 135557 - 167442nt              | (6371)   | AAT-----ATCTTCAGAAATCAGATAATGATAATGTATATGATAATATATTAGAA-ATAAAAAAACAAAATAATATT    |        |        |        |        |        |        |        |        |  |
| SARS-CoV-2 Reference Genome NC_045512.2              | (6013)   | AAACCAACCATAATCCAAACGCAAGCTTCGATAAATT-TAAGTTGTGTATGTATTAATATCAAAATTTGCTGATGATTTA |        |        |        |        |        |        |        |        |  |
|                                                      |          | Section 1847                                                                     |        |        |        |        |        |        |        |        |  |
|                                                      |          | (142143)                                                                         | 142143 | 142153 | 142164 | 142175 | 142186 | 142197 | 142208 | 142219 |  |
| Candidatus Carsonella ruddii strain BT chromosome... | (141997) | AATATTATTATTTGTTTAAACAAAATAGATAAAAAAATAAAAAATTTTATTTAAAAGAAAACAAAATTTTAAAAAT     |        |        |        |        |        |        |        |        |  |
| Candidatus Carsonella 135557 - 167442nt              | (6441)   | AATATTATTATTTGTTTAAACAAAATAGATAAAAAAATAAAAAATTTTATTTAAAAGAAAACAAAATTTTAAAAAT     |        |        |        |        |        |        |        |        |  |
| SARS-CoV-2 Reference Genome NC_045512.2              | (6089)   | AAACCAAGTTAATGTTTATAAAGAAACCTGCTTCAGAGAGGCTTAAAGTTACATTTTCCCTGACTTAAATGGTGTGT    |        |        |        |        |        |        |        |        |  |
|                                                      |          | Section 1848                                                                     |        |        |        |        |        |        |        |        |  |
|                                                      |          | (142220)                                                                         | 142220 | 142230 | 142241 | 142252 | 142263 | 142274 | 142285 | 142296 |  |
| Candidatus Carsonella ruddii strain BT chromosome... | (142074) | TTCTGCTAAAAATGGATTAAATATTAAAAAAC---TTTTAAATAGAACTCTATTAATTCTTTTAATTTAATTAAAAATA  |        |        |        |        |        |        |        |        |  |
| Candidatus Carsonella 135557 - 167442nt              | (6518)   | TTCTGCTAAAAATGGATTAAATATTAAAAAAC---TTTTAAATAGAACTCTATTAATTCTTTTAATTTAATTAAAAATA  |        |        |        |        |        |        |        |        |  |
| SARS-CoV-2 Reference Genome NC_045512.2              | (6166)   | GGTGCTATTGATTA--TAAACACTACACCTCTCTTTTAAAGAAAGGAGCTAATTG-----TTACAATAAACCTA       |        |        |        |        |        |        |        |        |  |

## SARS-CoV-2 &amp; Bakterien.apr

|                                                      |          |                                                                                   |        |        |        |        |        |        |        |        |
|------------------------------------------------------|----------|-----------------------------------------------------------------------------------|--------|--------|--------|--------|--------|--------|--------|--------|
|                                                      |          | Section 1849                                                                      |        |        |        |        |        |        |        |        |
|                                                      |          | (142297)                                                                          | 142297 | 142307 | 142318 | 142329 | 142340 | 142351 | 142362 | 142373 |
| Candidatus Carsonella ruddii strain BT chromosome... | (142148) | TTAATTTTAATGGAAGAAGATTATAATGGAATTATTGTAATAAGTTATTTGTAATAAATAATTTTTTTTATACAACTTTA  |        |        |        |        |        |        |        |        |
| Candidatus Carsonella 135557 - 167442nt              | (6592)   | TTAATTTTAATGGAAGAAGATTATAATGGAATTATTGTAATAAGTTATTTGTAATAAATAATTTTTTTTATACAACTTTA  |        |        |        |        |        |        |        |        |
| SARS-CoV-2 Reference Genome NC_045512.2              | (6234)   | TTG-TTT---GGCA--TGTTAAACAATGCAACTAATAAAGCCACGTATAAACCAAATACCCTGGTGT-ATACGT-TGTC   |        |        |        |        |        |        |        |        |
|                                                      |          | Section 1850                                                                      |        |        |        |        |        |        |        |        |
|                                                      |          | (142374)                                                                          | 142374 | 142384 | 142395 | 142406 | 142417 | 142428 | 142439 | 142450 |
| Candidatus Carsonella ruddii strain BT chromosome... | (142225) | TTTTTTATTA-AAAGGTATTTTAAAAGTTAA--TAATTTTATTTATTTTAAAAAATAAAAAAATATTAATTGATAATAT   |        |        |        |        |        |        |        |        |
| Candidatus Carsonella 135557 - 167442nt              | (6669)   | TTTTTTATTA-AAAGGTATTTTAAAAGTTAA--TAATTTTATTTATTTTAAAAAATAAAAAAATATTAATTGATAATAT   |        |        |        |        |        |        |        |        |
| SARS-CoV-2 Reference Genome NC_045512.2              | (6303)   | TTTGGAGCACAAAACCAAGTTGAAACATCAATTCGTTTGATGACTG---AAGTCAGAGGACGCGCAGGGGATGGAT      |        |        |        |        |        |        |        |        |
|                                                      |          | Section 1851                                                                      |        |        |        |        |        |        |        |        |
|                                                      |          | (142451)                                                                          | 142451 | 142461 | 142472 | 142483 | 142494 | 142505 | 142516 | 142527 |
| Candidatus Carsonella ruddii strain BT chromosome... | (142299) | AATGTGTTAACCAATTTTAATGTAAAAAGAATGTGTTTCTCCTGTGATATTTTGTAGTTAAAAATATTAGTTTCCCAATTG |        |        |        |        |        |        |        |        |
| Candidatus Carsonella 135557 - 167442nt              | (6743)   | AATGTGTTAACCAATTTTAATGTAAAAAGAATGTGTTTCTCCTGTGATATTTTGTAGTTAAAAATATTAGTTTCCCAATTG |        |        |        |        |        |        |        |        |
| SARS-CoV-2 Reference Genome NC_045512.2              | (6377)   | AATC-TTGCCTGCGAAGATCTAAAAACAG----T-CTC--TGAGAGAG--TAGTGGAAAATCCATCCATACAGAAAG     |        |        |        |        |        |        |        |        |
|                                                      |          | Section 1852                                                                      |        |        |        |        |        |        |        |        |
|                                                      |          | (142528)                                                                          | 142528 | 142538 | 142549 | 142560 | 142571 | 142582 | 142593 | 142604 |
| Candidatus Carsonella ruddii strain BT chromosome... | (142376) | ATTTTATTTTGTAGTTTAAAAAAATAATGATATTTTATATCTGAAGATATTTATAAAGAAAAATATCATATTTT        |        |        |        |        |        |        |        |        |
| Candidatus Carsonella 135557 - 167442nt              | (6820)   | ATTTTATTTTGTAGTTTAAAAAAATAATGATATTTTATATCTGAAGATATTTATAAAGAAAAATATCATATTTT        |        |        |        |        |        |        |        |        |
| SARS-CoV-2 Reference Genome NC_045512.2              | (6444)   | ACGTTCTTGAGTGTAACTGTGAAAACTACCAGAGTTGT---AGGAGACATATATCTTAAACCAAGCAATATAAGTTT-    |        |        |        |        |        |        |        |        |
|                                                      |          | Section 1853                                                                      |        |        |        |        |        |        |        |        |
|                                                      |          | (142605)                                                                          | 142605 | 142615 | 142626 | 142637 | 142648 | 142659 | 142670 | 142681 |
| Candidatus Carsonella ruddii strain BT chromosome... | (142453) | GATAACTTATATATAAAATCAGATAATCATACTATTTCTGTGCTATAGAAGATTATTATAATAATTTAAATTTTAA      |        |        |        |        |        |        |        |        |
| Candidatus Carsonella 135557 - 167442nt              | (6897)   | GATAACTTATATATAAAATCAGATAATCATACTATTTCTGTGCTATAGAAGATTATTATAATAATTTAAATTTTAA      |        |        |        |        |        |        |        |        |
| SARS-CoV-2 Reference Genome NC_045512.2              | (6517)   | -AAAAATTACAGAGAGGTTTGCCACAAGATCTAATGCTGCTTATGTAGACAATTCTAGTCT--TTACTATTAAAG       |        |        |        |        |        |        |        |        |
|                                                      |          | Section 1854                                                                      |        |        |        |        |        |        |        |        |
|                                                      |          | (142682)                                                                          | 142682 | 142692 | 142703 | 142714 | 142725 | 142736 | 142747 | 142758 |
| Candidatus Carsonella ruddii strain BT chromosome... | (142530) | TAATAAATTAACTTATTAAAAATTTCTTTAGGTAATTTTACAAATATCTGATTTTAAATATTGTTTAAATTTTAAAT     |        |        |        |        |        |        |        |        |
| Candidatus Carsonella 135557 - 167442nt              | (6974)   | TAATAAATTAACTTATTAAAAATTTCTTTAGGTAATTTTACAAATATCTGATTTTAAATATTGTTTAAATTTTAAAT     |        |        |        |        |        |        |        |        |
| SARS-CoV-2 Reference Genome NC_045512.2              | (6590)   | AAACCTAATGAA-TTATCTAGAGT---ATTAGGT----TTGAAACCT--TGCTAATCTATGTTTAACTGCTGCTT-      |        |        |        |        |        |        |        |        |

|                                                      |          |              |        |        |        |        |         |        |                         |             |       |      |         |     |      |     |      |     |    |     |     |     |      |     |     |    |    |     |   |   |   |   |   |   |   |   |   |   |   |   |   |   |   |   |   |   |   |   |   |   |   |   |   |   |   |   |   |   |   |   |   |   |   |   |   |   |   |   |   |   |   |   |   |   |   |   |   |   |   |   |   |   |   |   |   |   |   |   |   |   |   |   |   |   |   |   |   |   |   |   |   |   |   |   |   |   |   |   |   |   |   |   |   |   |   |   |   |   |   |   |   |   |   |   |   |   |   |   |   |   |   |   |   |   |   |   |   |   |   |   |   |   |   |   |   |   |   |   |   |   |   |   |   |   |   |   |   |   |   |   |   |   |   |   |   |   |   |   |   |   |   |   |   |   |   |   |   |   |   |   |   |   |   |   |   |   |   |   |   |   |   |   |   |   |   |   |   |   |   |   |   |   |   |   |   |   |   |   |   |   |   |   |   |   |   |   |   |   |   |   |   |   |   |   |   |   |   |   |   |   |   |   |   |   |   |   |   |   |   |   |   |   |   |   |   |   |   |   |   |   |   |   |   |   |   |   |   |   |   |   |   |   |   |   |   |   |   |   |   |   |   |   |   |   |   |   |   |   |   |   |   |   |   |   |   |   |   |   |   |   |   |   |   |   |   |   |   |   |   |   |   |   |   |   |   |   |   |   |   |   |   |   |   |   |   |   |   |   |   |   |   |   |   |   |   |   |   |   |   |   |   |   |   |   |   |   |   |   |   |   |   |   |   |   |   |   |   |   |   |   |   |   |   |   |   |   |   |   |   |   |   |   |   |   |   |   |   |   |   |   |   |   |   |   |   |   |   |   |   |   |   |   |   |   |   |   |   |   |   |   |   |   |   |   |   |   |   |   |   |   |   |   |   |   |   |   |   |   |   |   |   |   |   |   |   |   |   |   |   |   |   |   |   |   |   |   |   |   |   |   |   |   |   |   |   |   |   |   |   |   |   |   |   |   |   |   |   |   |   |   |   |   |   |   |   |   |   |   |   |   |   |   |   |   |   |   |   |   |   |   |   |   |   |   |   |   |   |   |   |   |   |   |   |   |   |   |   |   |   |   |   |   |   |   |   |   |   |   |   |   |   |   |   |   |   |   |   |   |   |   |   |   |   |   |   |   |   |   |   |   |   |   |   |   |   |   |   |   |   |   |   |   |   |   |   |   |   |   |   |   |   |   |   |   |   |   |   |   |   |   |   |   |   |   |   |   |   |   |   |   |   |   |   |   |   |   |   |   |   |   |   |   |   |   |   |   |   |   |   |   |   |   |   |   |   |   |   |   |   |   |   |   |   |   |   |   |   |   |   |   |   |   |   |   |   |   |   |   |   |   |   |   |   |   |   |   |   |   |   |   |   |   |   |   |   |   |   |   |   |   |   |   |   |   |   |   |   |   |   |   |   |   |   |   |   |   |   |   |   |   |   |   |   |   |   |   |   |   |   |   |   |   |   |   |   |   |   |   |   |   |   |   |   |   |   |   |   |   |   |   |   |   |   |   |   |   |   |   |   |   |   |   |   |   |   |   |   |   |   |   |   |   |   |   |   |   |   |   |   |   |   |   |   |   |   |   |   |   |   |   |   |   |   |   |   |   |   |   |   |   |   |   |   |   |   |   |   |   |   |   |   |   |   |   |   |   |   |   |   |   |   |   |   |   |   |   |   |   |   |   |   |   |   |   |   |   |   |   |   |   |   |   |   |   |   |   |   |   |   |   |   |   |   |   |   |   |   |   |   |   |   |   |   |   |   |   |   |   |
|------------------------------------------------------|----------|--------------|--------|--------|--------|--------|---------|--------|-------------------------|-------------|-------|------|---------|-----|------|-----|------|-----|----|-----|-----|-----|------|-----|-----|----|----|-----|---|---|---|---|---|---|---|---|---|---|---|---|---|---|---|---|---|---|---|---|---|---|---|---|---|---|---|---|---|---|---|---|---|---|---|---|---|---|---|---|---|---|---|---|---|---|---|---|---|---|---|---|---|---|---|---|---|---|---|---|---|---|---|---|---|---|---|---|---|---|---|---|---|---|---|---|---|---|---|---|---|---|---|---|---|---|---|---|---|---|---|---|---|---|---|---|---|---|---|---|---|---|---|---|---|---|---|---|---|---|---|---|---|---|---|---|---|---|---|---|---|---|---|---|---|---|---|---|---|---|---|---|---|---|---|---|---|---|---|---|---|---|---|---|---|---|---|---|---|---|---|---|---|---|---|---|---|---|---|---|---|---|---|---|---|---|---|---|---|---|---|---|---|---|---|---|---|---|---|---|---|---|---|---|---|---|---|---|---|---|---|---|---|---|---|---|---|---|---|---|---|---|---|---|---|---|---|---|---|---|---|---|---|---|---|---|---|---|---|---|---|---|---|---|---|---|---|---|---|---|---|---|---|---|---|---|---|---|---|---|---|---|---|---|---|---|---|---|---|---|---|---|---|---|---|---|---|---|---|---|---|---|---|---|---|---|---|---|---|---|---|---|---|---|---|---|---|---|---|---|---|---|---|---|---|---|---|---|---|---|---|---|---|---|---|---|---|---|---|---|---|---|---|---|---|---|---|---|---|---|---|---|---|---|---|---|---|---|---|---|---|---|---|---|---|---|---|---|---|---|---|---|---|---|---|---|---|---|---|---|---|---|---|---|---|---|---|---|---|---|---|---|---|---|---|---|---|---|---|---|---|---|---|---|---|---|---|---|---|---|---|---|---|---|---|---|---|---|---|---|---|---|---|---|---|---|---|---|---|---|---|---|---|---|---|---|---|---|---|---|---|---|---|---|---|---|---|---|---|---|---|---|---|---|---|---|---|---|---|---|---|---|---|---|---|---|---|---|---|---|---|---|---|---|---|---|---|---|---|---|---|---|---|---|---|---|---|---|---|---|---|---|---|---|---|---|---|---|---|---|---|---|---|---|---|---|---|---|---|---|---|---|---|---|---|---|---|---|---|---|---|---|---|---|---|---|---|---|---|---|---|---|---|---|---|---|---|---|---|---|---|---|---|---|---|---|---|---|---|---|---|---|---|---|---|---|---|---|---|---|---|---|---|---|---|---|---|---|---|---|---|---|---|---|---|---|---|---|---|---|---|---|---|---|---|---|---|---|---|---|---|---|---|---|---|---|---|---|---|---|---|---|---|---|---|---|---|---|---|---|---|---|---|---|---|---|---|---|---|---|---|---|---|---|---|---|---|---|---|---|---|---|---|---|---|---|---|---|---|---|---|---|---|---|---|---|---|---|---|---|---|---|---|---|---|---|---|---|---|---|---|---|---|---|---|---|---|---|---|---|---|---|---|---|---|---|---|---|---|---|---|---|---|---|---|---|---|---|---|---|---|---|---|---|---|---|---|---|---|---|---|---|---|---|---|---|---|---|---|---|---|---|---|---|---|---|---|---|---|---|---|---|---|---|---|---|---|---|---|---|---|---|---|---|---|---|---|---|---|---|---|---|---|---|---|---|---|---|---|---|---|---|---|---|---|---|---|---|---|---|---|---|---|---|---|---|---|---|---|---|---|---|---|---|---|---|---|---|---|---|---|---|---|---|---|---|---|---|---|---|---|---|---|---|---|---|---|---|---|---|---|---|---|---|---|---|---|---|---|---|
|                                                      |          | Section 1855 |        |        |        |        |         |        |                         |             |       |      |         |     |      |     |      |     |    |     |     |     |      |     |     |    |    |     |   |   |   |   |   |   |   |   |   |   |   |   |   |   |   |   |   |   |   |   |   |   |   |   |   |   |   |   |   |   |   |   |   |   |   |   |   |   |   |   |   |   |   |   |   |   |   |   |   |   |   |   |   |   |   |   |   |   |   |   |   |   |   |   |   |   |   |   |   |   |   |   |   |   |   |   |   |   |   |   |   |   |   |   |   |   |   |   |   |   |   |   |   |   |   |   |   |   |   |   |   |   |   |   |   |   |   |   |   |   |   |   |   |   |   |   |   |   |   |   |   |   |   |   |   |   |   |   |   |   |   |   |   |   |   |   |   |   |   |   |   |   |   |   |   |   |   |   |   |   |   |   |   |   |   |   |   |   |   |   |   |   |   |   |   |   |   |   |   |   |   |   |   |   |   |   |   |   |   |   |   |   |   |   |   |   |   |   |   |   |   |   |   |   |   |   |   |   |   |   |   |   |   |   |   |   |   |   |   |   |   |   |   |   |   |   |   |   |   |   |   |   |   |   |   |   |   |   |   |   |   |   |   |   |   |   |   |   |   |   |   |   |   |   |   |   |   |   |   |   |   |   |   |   |   |   |   |   |   |   |   |   |   |   |   |   |   |   |   |   |   |   |   |   |   |   |   |   |   |   |   |   |   |   |   |   |   |   |   |   |   |   |   |   |   |   |   |   |   |   |   |   |   |   |   |   |   |   |   |   |   |   |   |   |   |   |   |   |   |   |   |   |   |   |   |   |   |   |   |   |   |   |   |   |   |   |   |   |   |   |   |   |   |   |   |   |   |   |   |   |   |   |   |   |   |   |   |   |   |   |   |   |   |   |   |   |   |   |   |   |   |   |   |   |   |   |   |   |   |   |   |   |   |   |   |   |   |   |   |   |   |   |   |   |   |   |   |   |   |   |   |   |   |   |   |   |   |   |   |   |   |   |   |   |   |   |   |   |   |   |   |   |   |   |   |   |   |   |   |   |   |   |   |   |   |   |   |   |   |   |   |   |   |   |   |   |   |   |   |   |   |   |   |   |   |   |   |   |   |   |   |   |   |   |   |   |   |   |   |   |   |   |   |   |   |   |   |   |   |   |   |   |   |   |   |   |   |   |   |   |   |   |   |   |   |   |   |   |   |   |   |   |   |   |   |   |   |   |   |   |   |   |   |   |   |   |   |   |   |   |   |   |   |   |   |   |   |   |   |   |   |   |   |   |   |   |   |   |   |   |   |   |   |   |   |   |   |   |   |   |   |   |   |   |   |   |   |   |   |   |   |   |   |   |   |   |   |   |   |   |   |   |   |   |   |   |   |   |   |   |   |   |   |   |   |   |   |   |   |   |   |   |   |   |   |   |   |   |   |   |   |   |   |   |   |   |   |   |   |   |   |   |   |   |   |   |   |   |   |   |   |   |   |   |   |   |   |   |   |   |   |   |   |   |   |   |   |   |   |   |   |   |   |   |   |   |   |   |   |   |   |   |   |   |   |   |   |   |   |   |   |   |   |   |   |   |   |   |   |   |   |   |   |   |   |   |   |   |   |   |   |   |   |   |   |   |   |   |   |   |   |   |   |   |   |   |   |   |   |   |   |   |   |   |   |   |   |   |   |   |   |   |   |   |   |   |   |   |   |   |   |   |   |   |   |   |   |   |   |   |   |   |   |   |   |   |   |   |   |   |   |   |   |   |   |   |   |   |   |   |   |   |   |   |   |   |   |   |   |   |   |   |   |   |   |   |   |   |   |   |
|                                                      | (142759) | 142759       | 142769 | 142780 | 142791 | 142802 | 142813  | 142824 | 142835                  |             |       |      |         |     |      |     |      |     |    |     |     |     |      |     |     |    |    |     |   |   |   |   |   |   |   |   |   |   |   |   |   |   |   |   |   |   |   |   |   |   |   |   |   |   |   |   |   |   |   |   |   |   |   |   |   |   |   |   |   |   |   |   |   |   |   |   |   |   |   |   |   |   |   |   |   |   |   |   |   |   |   |   |   |   |   |   |   |   |   |   |   |   |   |   |   |   |   |   |   |   |   |   |   |   |   |   |   |   |   |   |   |   |   |   |   |   |   |   |   |   |   |   |   |   |   |   |   |   |   |   |   |   |   |   |   |   |   |   |   |   |   |   |   |   |   |   |   |   |   |   |   |   |   |   |   |   |   |   |   |   |   |   |   |   |   |   |   |   |   |   |   |   |   |   |   |   |   |   |   |   |   |   |   |   |   |   |   |   |   |   |   |   |   |   |   |   |   |   |   |   |   |   |   |   |   |   |   |   |   |   |   |   |   |   |   |   |   |   |   |   |   |   |   |   |   |   |   |   |   |   |   |   |   |   |   |   |   |   |   |   |   |   |   |   |   |   |   |   |   |   |   |   |   |   |   |   |   |   |   |   |   |   |   |   |   |   |   |   |   |   |   |   |   |   |   |   |   |   |   |   |   |   |   |   |   |   |   |   |   |   |   |   |   |   |   |   |   |   |   |   |   |   |   |   |   |   |   |   |   |   |   |   |   |   |   |   |   |   |   |   |   |   |   |   |   |   |   |   |   |   |   |   |   |   |   |   |   |   |   |   |   |   |   |   |   |   |   |   |   |   |   |   |   |   |   |   |   |   |   |   |   |   |   |   |   |   |   |   |   |   |   |   |   |   |   |   |   |   |   |   |   |   |   |   |   |   |   |   |   |   |   |   |   |   |   |   |   |   |   |   |   |   |   |   |   |   |   |   |   |   |   |   |   |   |   |   |   |   |   |   |   |   |   |   |   |   |   |   |   |   |   |   |   |   |   |   |   |   |   |   |   |   |   |   |   |   |   |   |   |   |   |   |   |   |   |   |   |   |   |   |   |   |   |   |   |   |   |   |   |   |   |   |   |   |   |   |   |   |   |   |   |   |   |   |   |   |   |   |   |   |   |   |   |   |   |   |   |   |   |   |   |   |   |   |   |   |   |   |   |   |   |   |   |   |   |   |   |   |   |   |   |   |   |   |   |   |   |   |   |   |   |   |   |   |   |   |   |   |   |   |   |   |   |   |   |   |   |   |   |   |   |   |   |   |   |   |   |   |   |   |   |   |   |   |   |   |   |   |   |   |   |   |   |   |   |   |   |   |   |   |   |   |   |   |   |   |   |   |   |   |   |   |   |   |   |   |   |   |   |   |   |   |   |   |   |   |   |   |   |   |   |   |   |   |   |   |   |   |   |   |   |   |   |   |   |   |   |   |   |   |   |   |   |   |   |   |   |   |   |   |   |   |   |   |   |   |   |   |   |   |   |   |   |   |   |   |   |   |   |   |   |   |   |   |   |   |   |   |   |   |   |   |   |   |   |   |   |   |   |   |   |   |   |   |   |   |   |   |   |   |   |   |   |   |   |   |   |   |   |   |   |   |   |   |   |   |   |   |   |   |   |   |   |   |   |   |   |   |   |   |   |   |   |   |   |   |   |   |   |   |   |   |   |   |   |   |   |   |   |   |   |   |   |   |   |   |   |   |   |   |   |   |   |   |   |   |   |   |   |   |   |   |   |   |   |   |   |   |   |   |   |   |   |   |   |   |   |   |   |   |   |   |   |   |   |   |   |   |
| Candidatus Carsonella ruddii strain BT chromosome... | (142607) | GTAA         | AATAT  | TATTA  | ATTGGT | TGTTGA | ATTAGAT | TATAT  | CATAAAAAAAGAAATTGTTAAAA | AAAAATATTTT | TTTAT | AAAA |         |     |      |     |      |     |    |     |     |     |      |     |     |    |    |     |   |   |   |   |   |   |   |   |   |   |   |   |   |   |   |   |   |   |   |   |   |   |   |   |   |   |   |   |   |   |   |   |   |   |   |   |   |   |   |   |   |   |   |   |   |   |   |   |   |   |   |   |   |   |   |   |   |   |   |   |   |   |   |   |   |   |   |   |   |   |   |   |   |   |   |   |   |   |   |   |   |   |   |   |   |   |   |   |   |   |   |   |   |   |   |   |   |   |   |   |   |   |   |   |   |   |   |   |   |   |   |   |   |   |   |   |   |   |   |   |   |   |   |   |   |   |   |   |   |   |   |   |   |   |   |   |   |   |   |   |   |   |   |   |   |   |   |   |   |   |   |   |   |   |   |   |   |   |   |   |   |   |   |   |   |   |   |   |   |   |   |   |   |   |   |   |   |   |   |   |   |   |   |   |   |   |   |   |   |   |   |   |   |   |   |   |   |   |   |   |   |   |   |   |   |   |   |   |   |   |   |   |   |   |   |   |   |   |   |   |   |   |   |   |   |   |   |   |   |   |   |   |   |   |   |   |   |   |   |   |   |   |   |   |   |   |   |   |   |   |   |   |   |   |   |   |   |   |   |   |   |   |   |   |   |   |   |   |   |   |   |   |   |   |   |   |   |   |   |   |   |   |   |   |   |   |   |   |   |   |   |   |   |   |   |   |   |   |   |   |   |   |   |   |   |   |   |   |   |   |   |   |   |   |   |   |   |   |   |   |   |   |   |   |   |   |   |   |   |   |   |   |   |   |   |   |   |   |   |   |   |   |   |   |   |   |   |   |   |   |   |   |   |   |   |   |   |   |   |   |   |   |   |   |   |   |   |   |   |   |   |   |   |   |   |   |   |   |   |   |   |   |   |   |   |   |   |   |   |   |   |   |   |   |   |   |   |   |   |   |   |   |   |   |   |   |   |   |   |   |   |   |   |   |   |   |   |   |   |   |   |   |   |   |   |   |   |   |   |   |   |   |   |   |   |   |   |   |   |   |   |   |   |   |   |   |   |   |   |   |   |   |   |   |   |   |   |   |   |   |   |   |   |   |   |   |   |   |   |   |   |   |   |   |   |   |   |   |   |   |   |   |   |   |   |   |   |   |   |   |   |   |   |   |   |   |   |   |   |   |   |   |   |   |   |   |   |   |   |   |   |   |   |   |   |   |   |   |   |   |   |   |   |   |   |   |   |   |   |   |   |   |   |   |   |   |   |   |   |   |   |   |   |   |   |   |   |   |   |   |   |   |   |   |   |   |   |   |   |   |   |   |   |   |   |   |   |   |   |   |   |   |   |   |   |   |   |   |   |   |   |   |   |   |   |   |   |   |   |   |   |   |   |   |   |   |   |   |   |   |   |   |   |   |   |   |   |   |   |   |   |   |   |   |   |   |   |   |   |   |   |   |   |   |   |   |   |   |   |   |   |   |   |   |   |   |   |   |   |   |   |   |   |   |   |   |   |   |   |   |   |   |   |   |   |   |   |   |   |   |   |   |   |   |   |   |   |   |   |   |   |   |   |   |   |   |   |   |   |   |   |   |   |   |   |   |   |   |   |   |   |   |   |   |   |   |   |   |   |   |   |   |   |   |   |   |   |   |   |   |   |   |   |   |   |   |   |   |   |   |   |   |   |   |   |   |   |   |   |   |   |   |   |   |   |   |   |   |   |   |   |   |   |   |   |   |   |   |   |   |   |   |   |   |   |   |   |   |   |   |   |   |   |   |   |   |   |   |   |   |
| Candidatus Carsonella 135557 - 167442nt              | (7051)   | GTAA         | AATAT  | TATTA  | ATTGGT | TGTTGA | ATTAGAT | TATAT  | CATAAAAAAAGAAATTGTTAAAA | AAAAATATTTT | TTTAT | AAAA |         |     |      |     |      |     |    |     |     |     |      |     |     |    |    |     |   |   |   |   |   |   |   |   |   |   |   |   |   |   |   |   |   |   |   |   |   |   |   |   |   |   |   |   |   |   |   |   |   |   |   |   |   |   |   |   |   |   |   |   |   |   |   |   |   |   |   |   |   |   |   |   |   |   |   |   |   |   |   |   |   |   |   |   |   |   |   |   |   |   |   |   |   |   |   |   |   |   |   |   |   |   |   |   |   |   |   |   |   |   |   |   |   |   |   |   |   |   |   |   |   |   |   |   |   |   |   |   |   |   |   |   |   |   |   |   |   |   |   |   |   |   |   |   |   |   |   |   |   |   |   |   |   |   |   |   |   |   |   |   |   |   |   |   |   |   |   |   |   |   |   |   |   |   |   |   |   |   |   |   |   |   |   |   |   |   |   |   |   |   |   |   |   |   |   |   |   |   |   |   |   |   |   |   |   |   |   |   |   |   |   |   |   |   |   |   |   |   |   |   |   |   |   |   |   |   |   |   |   |   |   |   |   |   |   |   |   |   |   |   |   |   |   |   |   |   |   |   |   |   |   |   |   |   |   |   |   |   |   |   |   |   |   |   |   |   |   |   |   |   |   |   |   |   |   |   |   |   |   |   |   |   |   |   |   |   |   |   |   |   |   |   |   |   |   |   |   |   |   |   |   |   |   |   |   |   |   |   |   |   |   |   |   |   |   |   |   |   |   |   |   |   |   |   |   |   |   |   |   |   |   |   |   |   |   |   |   |   |   |   |   |   |   |   |   |   |   |   |   |   |   |   |   |   |   |   |   |   |   |   |   |   |   |   |   |   |   |   |   |   |   |   |   |   |   |   |   |   |   |   |   |   |   |   |   |   |   |   |   |   |   |   |   |   |   |   |   |   |   |   |   |   |   |   |   |   |   |   |   |   |   |   |   |   |   |   |   |   |   |   |   |   |   |   |   |   |   |   |   |   |   |   |   |   |   |   |   |   |   |   |   |   |   |   |   |   |   |   |   |   |   |   |   |   |   |   |   |   |   |   |   |   |   |   |   |   |   |   |   |   |   |   |   |   |   |   |   |   |   |   |   |   |   |   |   |   |   |   |   |   |   |   |   |   |   |   |   |   |   |   |   |   |   |   |   |   |   |   |   |   |   |   |   |   |   |   |   |   |   |   |   |   |   |   |   |   |   |   |   |   |   |   |   |   |   |   |   |   |   |   |   |   |   |   |   |   |   |   |   |   |   |   |   |   |   |   |   |   |   |   |   |   |   |   |   |   |   |   |   |   |   |   |   |   |   |   |   |   |   |   |   |   |   |   |   |   |   |   |   |   |   |   |   |   |   |   |   |   |   |   |   |   |   |   |   |   |   |   |   |   |   |   |   |   |   |   |   |   |   |   |   |   |   |   |   |   |   |   |   |   |   |   |   |   |   |   |   |   |   |   |   |   |   |   |   |   |   |   |   |   |   |   |   |   |   |   |   |   |   |   |   |   |   |   |   |   |   |   |   |   |   |   |   |   |   |   |   |   |   |   |   |   |   |   |   |   |   |   |   |   |   |   |   |   |   |   |   |   |   |   |   |   |   |   |   |   |   |   |   |   |   |   |   |   |   |   |   |   |   |   |   |   |   |   |   |   |   |   |   |   |   |   |   |   |   |   |   |   |   |   |   |   |   |   |   |   |   |   |   |   |   |   |   |   |   |   |   |   |   |   |   |   |   |   |   |   |   |   |   |   |   |   |   |   |   |   |   |   |   |   |   |   |   |   |   |   |
| SARS-CoV-2 Reference Genome NC_045512.2              | (6656)   | ----         | AATA   | G      | TG     | TCCC   | T       | TGGG   | GAT                     | ACT         | AT-   | AGCT | AAT---- | TA  | TGCT | AAG | CCT  | TT  | TC | T   | TAA | C   | AAAG | T   | TG  | TT | AG | T   | A | C | A | C |   |   |   |   |   |   |   |   |   |   |   |   |   |   |   |   |   |   |   |   |   |   |   |   |   |   |   |   |   |   |   |   |   |   |   |   |   |   |   |   |   |   |   |   |   |   |   |   |   |   |   |   |   |   |   |   |   |   |   |   |   |   |   |   |   |   |   |   |   |   |   |   |   |   |   |   |   |   |   |   |   |   |   |   |   |   |   |   |   |   |   |   |   |   |   |   |   |   |   |   |   |   |   |   |   |   |   |   |   |   |   |   |   |   |   |   |   |   |   |   |   |   |   |   |   |   |   |   |   |   |   |   |   |   |   |   |   |   |   |   |   |   |   |   |   |   |   |   |   |   |   |   |   |   |   |   |   |   |   |   |   |   |   |   |   |   |   |   |   |   |   |   |   |   |   |   |   |   |   |   |   |   |   |   |   |   |   |   |   |   |   |   |   |   |   |   |   |   |   |   |   |   |   |   |   |   |   |   |   |   |   |   |   |   |   |   |   |   |   |   |   |   |   |   |   |   |   |   |   |   |   |   |   |   |   |   |   |   |   |   |   |   |   |   |   |   |   |   |   |   |   |   |   |   |   |   |   |   |   |   |   |   |   |   |   |   |   |   |   |   |   |   |   |   |   |   |   |   |   |   |   |   |   |   |   |   |   |   |   |   |   |   |   |   |   |   |   |   |   |   |   |   |   |   |   |   |   |   |   |   |   |   |   |   |   |   |   |   |   |   |   |   |   |   |   |   |   |   |   |   |   |   |   |   |   |   |   |   |   |   |   |   |   |   |   |   |   |   |   |   |   |   |   |   |   |   |   |   |   |   |   |   |   |   |   |   |   |   |   |   |   |   |   |   |   |   |   |   |   |   |   |   |   |   |   |   |   |   |   |   |   |   |   |   |   |   |   |   |   |   |   |   |   |   |   |   |   |   |   |   |   |   |   |   |   |   |   |   |   |   |   |   |   |   |   |   |   |   |   |   |   |   |   |   |   |   |   |   |   |   |   |   |   |   |   |   |   |   |   |   |   |   |   |   |   |   |   |   |   |   |   |   |   |   |   |   |   |   |   |   |   |   |   |   |   |   |   |   |   |   |   |   |   |   |   |   |   |   |   |   |   |   |   |   |   |   |   |   |   |   |   |   |   |   |   |   |   |   |   |   |   |   |   |   |   |   |   |   |   |   |   |   |   |   |   |   |   |   |   |   |   |   |   |   |   |   |   |   |   |   |   |   |   |   |   |   |   |   |   |   |   |   |   |   |   |   |   |   |   |   |   |   |   |   |   |   |   |   |   |   |   |   |   |   |   |   |   |   |   |   |   |   |   |   |   |   |   |   |   |   |   |   |   |   |   |   |   |   |   |   |   |   |   |   |   |   |   |   |   |   |   |   |   |   |   |   |   |   |   |   |   |   |   |   |   |   |   |   |   |   |   |   |   |   |   |   |   |   |   |   |   |   |   |   |   |   |   |   |   |   |   |   |   |   |   |   |   |   |   |   |   |   |   |   |   |   |   |   |   |   |   |   |   |   |   |   |   |   |   |   |   |   |   |   |   |   |   |   |   |   |   |   |   |   |   |   |   |   |   |   |   |   |   |   |   |   |   |   |   |   |   |   |   |   |   |   |   |   |   |   |   |   |   |   |   |   |   |   |   |   |   |   |   |   |   |   |   |   |   |   |   |   |   |   |   |   |   |   |   |   |   |   |   |   |   |   |   |   |   |   |   |   |   |   |   |   |
|                                                      |          | Section 1856 |        |        |        |        |         |        |                         |             |       |      |         |     |      |     |      |     |    |     |     |     |      |     |     |    |    |     |   |   |   |   |   |   |   |   |   |   |   |   |   |   |   |   |   |   |   |   |   |   |   |   |   |   |   |   |   |   |   |   |   |   |   |   |   |   |   |   |   |   |   |   |   |   |   |   |   |   |   |   |   |   |   |   |   |   |   |   |   |   |   |   |   |   |   |   |   |   |   |   |   |   |   |   |   |   |   |   |   |   |   |   |   |   |   |   |   |   |   |   |   |   |   |   |   |   |   |   |   |   |   |   |   |   |   |   |   |   |   |   |   |   |   |   |   |   |   |   |   |   |   |   |   |   |   |   |   |   |   |   |   |   |   |   |   |   |   |   |   |   |   |   |   |   |   |   |   |   |   |   |   |   |   |   |   |   |   |   |   |   |   |   |   |   |   |   |   |   |   |   |   |   |   |   |   |   |   |   |   |   |   |   |   |   |   |   |   |   |   |   |   |   |   |   |   |   |   |   |   |   |   |   |   |   |   |   |   |   |   |   |   |   |   |   |   |   |   |   |   |   |   |   |   |   |   |   |   |   |   |   |   |   |   |   |   |   |   |   |   |   |   |   |   |   |   |   |   |   |   |   |   |   |   |   |   |   |   |   |   |   |   |   |   |   |   |   |   |   |   |   |   |   |   |   |   |   |   |   |   |   |   |   |   |   |   |   |   |   |   |   |   |   |   |   |   |   |   |   |   |   |   |   |   |   |   |   |   |   |   |   |   |   |   |   |   |   |   |   |   |   |   |   |   |   |   |   |   |   |   |   |   |   |   |   |   |   |   |   |   |   |   |   |   |   |   |   |   |   |   |   |   |   |   |   |   |   |   |   |   |   |   |   |   |   |   |   |   |   |   |   |   |   |   |   |   |   |   |   |   |   |   |   |   |   |   |   |   |   |   |   |   |   |   |   |   |   |   |   |   |   |   |   |   |   |   |   |   |   |   |   |   |   |   |   |   |   |   |   |   |   |   |   |   |   |   |   |   |   |   |   |   |   |   |   |   |   |   |   |   |   |   |   |   |   |   |   |   |   |   |   |   |   |   |   |   |   |   |   |   |   |   |   |   |   |   |   |   |   |   |   |   |   |   |   |   |   |   |   |   |   |   |   |   |   |   |   |   |   |   |   |   |   |   |   |   |   |   |   |   |   |   |   |   |   |   |   |   |   |   |   |   |   |   |   |   |   |   |   |   |   |   |   |   |   |   |   |   |   |   |   |   |   |   |   |   |   |   |   |   |   |   |   |   |   |   |   |   |   |   |   |   |   |   |   |   |   |   |   |   |   |   |   |   |   |   |   |   |   |   |   |   |   |   |   |   |   |   |   |   |   |   |   |   |   |   |   |   |   |   |   |   |   |   |   |   |   |   |   |   |   |   |   |   |   |   |   |   |   |   |   |   |   |   |   |   |   |   |   |   |   |   |   |   |   |   |   |   |   |   |   |   |   |   |   |   |   |   |   |   |   |   |   |   |   |   |   |   |   |   |   |   |   |   |   |   |   |   |   |   |   |   |   |   |   |   |   |   |   |   |   |   |   |   |   |   |   |   |   |   |   |   |   |   |   |   |   |   |   |   |   |   |   |   |   |   |   |   |   |   |   |   |   |   |   |   |   |   |   |   |   |   |   |   |   |   |   |   |   |   |   |   |   |   |   |   |   |   |   |   |   |   |   |   |   |   |   |   |   |   |   |   |   |   |   |   |   |   |   |   |   |   |   |   |   |   |   |   |   |   |   |   |   |   |   |   |   |   |   |
|                                                      | (142836) | 142836       | 142846 | 142857 | 142868 | 142879 | 142890  | 142901 | 142912                  |             |       |      |         |     |      |     |      |     |    |     |     |     |      |     |     |    |    |     |   |   |   |   |   |   |   |   |   |   |   |   |   |   |   |   |   |   |   |   |   |   |   |   |   |   |   |   |   |   |   |   |   |   |   |   |   |   |   |   |   |   |   |   |   |   |   |   |   |   |   |   |   |   |   |   |   |   |   |   |   |   |   |   |   |   |   |   |   |   |   |   |   |   |   |   |   |   |   |   |   |   |   |   |   |   |   |   |   |   |   |   |   |   |   |   |   |   |   |   |   |   |   |   |   |   |   |   |   |   |   |   |   |   |   |   |   |   |   |   |   |   |   |   |   |   |   |   |   |   |   |   |   |   |   |   |   |   |   |   |   |   |   |   |   |   |   |   |   |   |   |   |   |   |   |   |   |   |   |   |   |   |   |   |   |   |   |   |   |   |   |   |   |   |   |   |   |   |   |   |   |   |   |   |   |   |   |   |   |   |   |   |   |   |   |   |   |   |   |   |   |   |   |   |   |   |   |   |   |   |   |   |   |   |   |   |   |   |   |   |   |   |   |   |   |   |   |   |   |   |   |   |   |   |   |   |   |   |   |   |   |   |   |   |   |   |   |   |   |   |   |   |   |   |   |   |   |   |   |   |   |   |   |   |   |   |   |   |   |   |   |   |   |   |   |   |   |   |   |   |   |   |   |   |   |   |   |   |   |   |   |   |   |   |   |   |   |   |   |   |   |   |   |   |   |   |   |   |   |   |   |   |   |   |   |   |   |   |   |   |   |   |   |   |   |   |   |   |   |   |   |   |   |   |   |   |   |   |   |   |   |   |   |   |   |   |   |   |   |   |   |   |   |   |   |   |   |   |   |   |   |   |   |   |   |   |   |   |   |   |   |   |   |   |   |   |   |   |   |   |   |   |   |   |   |   |   |   |   |   |   |   |   |   |   |   |   |   |   |   |   |   |   |   |   |   |   |   |   |   |   |   |   |   |   |   |   |   |   |   |   |   |   |   |   |   |   |   |   |   |   |   |   |   |   |   |   |   |   |   |   |   |   |   |   |   |   |   |   |   |   |   |   |   |   |   |   |   |   |   |   |   |   |   |   |   |   |   |   |   |   |   |   |   |   |   |   |   |   |   |   |   |   |   |   |   |   |   |   |   |   |   |   |   |   |   |   |   |   |   |   |   |   |   |   |   |   |   |   |   |   |   |   |   |   |   |   |   |   |   |   |   |   |   |   |   |   |   |   |   |   |   |   |   |   |   |   |   |   |   |   |   |   |   |   |   |   |   |   |   |   |   |   |   |   |   |   |   |   |   |   |   |   |   |   |   |   |   |   |   |   |   |   |   |   |   |   |   |   |   |   |   |   |   |   |   |   |   |   |   |   |   |   |   |   |   |   |   |   |   |   |   |   |   |   |   |   |   |   |   |   |   |   |   |   |   |   |   |   |   |   |   |   |   |   |   |   |   |   |   |   |   |   |   |   |   |   |   |   |   |   |   |   |   |   |   |   |   |   |   |   |   |   |   |   |   |   |   |   |   |   |   |   |   |   |   |   |   |   |   |   |   |   |   |   |   |   |   |   |   |   |   |   |   |   |   |   |   |   |   |   |   |   |   |   |   |   |   |   |   |   |   |   |   |   |   |   |   |   |   |   |   |   |   |   |   |   |   |   |   |   |   |   |   |   |   |   |   |   |   |   |   |   |   |   |   |   |   |   |   |   |   |   |   |   |   |   |   |   |   |   |   |   |   |   |   |   |   |   |   |   |   |   |   |   |   |   |   |   |   |
| Candidatus Carsonella ruddii strain BT chromosome... | (142684) | GA           | ATT    | TAA    | ATTA   | -AT    | GAT     | TGT--  | AAT                     | CGAT        | TTTTT | T    | TAA     | TAA | AAAT | T   | TATA | ATT | TG | TAA | TAA | ATT | T    | AG  | AA  | T  | A  | ATT | T | A | C | A | C |   |   |   |   |   |   |   |   |   |   |   |   |   |   |   |   |   |   |   |   |   |   |   |   |   |   |   |   |   |   |   |   |   |   |   |   |   |   |   |   |   |   |   |   |   |   |   |   |   |   |   |   |   |   |   |   |   |   |   |   |   |   |   |   |   |   |   |   |   |   |   |   |   |   |   |   |   |   |   |   |   |   |   |   |   |   |   |   |   |   |   |   |   |   |   |   |   |   |   |   |   |   |   |   |   |   |   |   |   |   |   |   |   |   |   |   |   |   |   |   |   |   |   |   |   |   |   |   |   |   |   |   |   |   |   |   |   |   |   |   |   |   |   |   |   |   |   |   |   |   |   |   |   |   |   |   |   |   |   |   |   |   |   |   |   |   |   |   |   |   |   |   |   |   |   |   |   |   |   |   |   |   |   |   |   |   |   |   |   |   |   |   |   |   |   |   |   |   |   |   |   |   |   |   |   |   |   |   |   |   |   |   |   |   |   |   |   |   |   |   |   |   |   |   |   |   |   |   |   |   |   |   |   |   |   |   |   |   |   |   |   |   |   |   |   |   |   |   |   |   |   |   |   |   |   |   |   |   |   |   |   |   |   |   |   |   |   |   |   |   |   |   |   |   |   |   |   |   |   |   |   |   |   |   |   |   |   |   |   |   |   |   |   |   |   |   |   |   |   |   |   |   |   |   |   |   |   |   |   |   |   |   |   |   |   |   |   |   |   |   |   |   |   |   |   |   |   |   |   |   |   |   |   |   |   |   |   |   |   |   |   |   |   |   |   |   |   |   |   |   |   |   |   |   |   |   |   |   |   |   |   |   |   |   |   |   |   |   |   |   |   |   |   |   |   |   |   |   |   |   |   |   |   |   |   |   |   |   |   |   |   |   |   |   |   |   |   |   |   |   |   |   |   |   |   |   |   |   |   |   |   |   |   |   |   |   |   |   |   |   |   |   |   |   |   |   |   |   |   |   |   |   |   |   |   |   |   |   |   |   |   |   |   |   |   |   |   |   |   |   |   |   |   |   |   |   |   |   |   |   |   |   |   |   |   |   |   |   |   |   |   |   |   |   |   |   |   |   |   |   |   |   |   |   |   |   |   |   |   |   |   |   |   |   |   |   |   |   |   |   |   |   |   |   |   |   |   |   |   |   |   |   |   |   |   |   |   |   |   |   |   |   |   |   |   |   |   |   |   |   |   |   |   |   |   |   |   |   |   |   |   |   |   |   |   |   |   |   |   |   |   |   |   |   |   |   |   |   |   |   |   |   |   |   |   |   |   |   |   |   |   |   |   |   |   |   |   |   |   |   |   |   |   |   |   |   |   |   |   |   |   |   |   |   |   |   |   |   |   |   |   |   |   |   |   |   |   |   |   |   |   |   |   |   |   |   |   |   |   |   |   |   |   |   |   |   |   |   |   |   |   |   |   |   |   |   |   |   |   |   |   |   |   |   |   |   |   |   |   |   |   |   |   |   |   |   |   |   |   |   |   |   |   |   |   |   |   |   |   |   |   |   |   |   |   |   |   |   |   |   |   |   |   |   |   |   |   |   |   |   |   |   |   |   |   |   |   |   |   |   |   |   |   |   |   |   |   |   |   |   |   |   |   |   |   |   |   |   |   |   |   |   |   |   |   |   |   |   |   |   |   |   |   |   |   |   |   |   |   |   |   |   |   |   |   |   |   |   |   |   |   |   |   |   |   |   |   |   |   |   |   |   |   |   |   |
| Candidatus Carsonella 135557 - 167442nt              | (7128)   | GA           | ATT    | TAA    | ATTA   | -AT    | GAT     | TGT--  | AAT                     | CGAT        | TTTTT | T    | TAA     | TAA | AAAT | T   | TATA | ATT | TG | TAA | TAA | ATT | T    | AG  | AA  | T  | A  | ATT | T | A | C | A | C |   |   |   |   |   |   |   |   |   |   |   |   |   |   |   |   |   |   |   |   |   |   |   |   |   |   |   |   |   |   |   |   |   |   |   |   |   |   |   |   |   |   |   |   |   |   |   |   |   |   |   |   |   |   |   |   |   |   |   |   |   |   |   |   |   |   |   |   |   |   |   |   |   |   |   |   |   |   |   |   |   |   |   |   |   |   |   |   |   |   |   |   |   |   |   |   |   |   |   |   |   |   |   |   |   |   |   |   |   |   |   |   |   |   |   |   |   |   |   |   |   |   |   |   |   |   |   |   |   |   |   |   |   |   |   |   |   |   |   |   |   |   |   |   |   |   |   |   |   |   |   |   |   |   |   |   |   |   |   |   |   |   |   |   |   |   |   |   |   |   |   |   |   |   |   |   |   |   |   |   |   |   |   |   |   |   |   |   |   |   |   |   |   |   |   |   |   |   |   |   |   |   |   |   |   |   |   |   |   |   |   |   |   |   |   |   |   |   |   |   |   |   |   |   |   |   |   |   |   |   |   |   |   |   |   |   |   |   |   |   |   |   |   |   |   |   |   |   |   |   |   |   |   |   |   |   |   |   |   |   |   |   |   |   |   |   |   |   |   |   |   |   |   |   |   |   |   |   |   |   |   |   |   |   |   |   |   |   |   |   |   |   |   |   |   |   |   |   |   |   |   |   |   |   |   |   |   |   |   |   |   |   |   |   |   |   |   |   |   |   |   |   |   |   |   |   |   |   |   |   |   |   |   |   |   |   |   |   |   |   |   |   |   |   |   |   |   |   |   |   |   |   |   |   |   |   |   |   |   |   |   |   |   |   |   |   |   |   |   |   |   |   |   |   |   |   |   |   |   |   |   |   |   |   |   |   |   |   |   |   |   |   |   |   |   |   |   |   |   |   |   |   |   |   |   |   |   |   |   |   |   |   |   |   |   |   |   |   |   |   |   |   |   |   |   |   |   |   |   |   |   |   |   |   |   |   |   |   |   |   |   |   |   |   |   |   |   |   |   |   |   |   |   |   |   |   |   |   |   |   |   |   |   |   |   |   |   |   |   |   |   |   |   |   |   |   |   |   |   |   |   |   |   |   |   |   |   |   |   |   |   |   |   |   |   |   |   |   |   |   |   |   |   |   |   |   |   |   |   |   |   |   |   |   |   |   |   |   |   |   |   |   |   |   |   |   |   |   |   |   |   |   |   |   |   |   |   |   |   |   |   |   |   |   |   |   |   |   |   |   |   |   |   |   |   |   |   |   |   |   |   |   |   |   |   |   |   |   |   |   |   |   |   |   |   |   |   |   |   |   |   |   |   |   |   |   |   |   |   |   |   |   |   |   |   |   |   |   |   |   |   |   |   |   |   |   |   |   |   |   |   |   |   |   |   |   |   |   |   |   |   |   |   |   |   |   |   |   |   |   |   |   |   |   |   |   |   |   |   |   |   |   |   |   |   |   |   |   |   |   |   |   |   |   |   |   |   |   |   |   |   |   |   |   |   |   |   |   |   |   |   |   |   |   |   |   |   |   |   |   |   |   |   |   |   |   |   |   |   |   |   |   |   |   |   |   |   |   |   |   |   |   |   |   |   |   |   |   |   |   |   |   |   |   |   |   |   |   |   |   |   |   |   |   |   |   |   |   |   |   |   |   |   |   |   |   |   |   |   |   |   |   |   |   |   |   |   |   |   |   |   |   |   |   |   |   |   |   |   |   |   |   |   |   |   |
| SARS-CoV-2 Reference Genome NC_045512.2              | (6724)   | T            | A      | C--    | TAA    | C      | A       | T      | A                       | G           | T     | T    | A       | C   | A    | G   | T    | T   | T  | G   | T   | A   | C    | TAA | --- | T  | T  | A   | T | A | T | G | C |   |   |   |   |   |   |   |   |   |   |   |   |   |   |   |   |   |   |   |   |   |   |   |   |   |   |   |   |   |   |   |   |   |   |   |   |   |   |   |   |   |   |   |   |   |   |   |   |   |   |   |   |   |   |   |   |   |   |   |   |   |   |   |   |   |   |   |   |   |   |   |   |   |   |   |   |   |   |   |   |   |   |   |   |   |   |   |   |   |   |   |   |   |   |   |   |   |   |   |   |   |   |   |   |   |   |   |   |   |   |   |   |   |   |   |   |   |   |   |   |   |   |   |   |   |   |   |   |   |   |   |   |   |   |   |   |   |   |   |   |   |   |   |   |   |   |   |   |   |   |   |   |   |   |   |   |   |   |   |   |   |   |   |   |   |   |   |   |   |   |   |   |   |   |   |   |   |   |   |   |   |   |   |   |   |   |   |   |   |   |   |   |   |   |   |   |   |   |   |   |   |   |   |   |   |   |   |   |   |   |   |   |   |   |   |   |   |   |   |   |   |   |   |   |   |   |   |   |   |   |   |   |   |   |   |   |   |   |   |   |   |   |   |   |   |   |   |   |   |   |   |   |   |   |   |   |   |   |   |   |   |   |   |   |   |   |   |   |   |   |   |   |   |   |   |   |   |   |   |   |   |   |   |   |   |   |   |   |   |   |   |   |   |   |   |   |   |   |   |   |   |   |   |   |   |   |   |   |   |   |   |   |   |   |   |   |   |   |   |   |   |   |   |   |   |   |   |   |   |   |   |   |   |   |   |   |   |   |   |   |   |   |   |   |   |   |   |   |   |   |   |   |   |   |   |   |   |   |   |   |   |   |   |   |   |   |   |   |   |   |   |   |   |   |   |   |   |   |   |   |   |   |   |   |   |   |   |   |   |   |   |   |   |   |   |   |   |   |   |   |   |   |   |   |   |   |   |   |   |   |   |   |   |   |   |   |   |   |   |   |   |   |   |   |   |   |   |   |   |   |   |   |   |   |   |   |   |   |   |   |   |   |   |   |   |   |   |   |   |   |   |   |   |   |   |   |   |   |   |   |   |   |   |   |   |   |   |   |   |   |   |   |   |   |   |   |   |   |   |   |   |   |   |   |   |   |   |   |   |   |   |   |   |   |   |   |   |   |   |   |   |   |   |   |   |   |   |   |   |   |   |   |   |   |   |   |   |   |   |   |   |   |   |   |   |   |   |   |   |   |   |   |   |   |   |   |   |   |   |   |   |   |   |   |   |   |   |   |   |   |   |   |   |   |   |   |   |   |   |   |   |   |   |   |   |   |   |   |   |   |   |   |   |   |   |   |   |   |   |   |   |   |   |   |   |   |   |   |   |   |   |   |   |   |   |   |   |   |   |   |   |   |   |   |   |   |   |   |   |   |   |   |   |   |   |   |   |   |   |   |   |   |   |   |   |   |   |   |   |   |   |   |   |   |   |   |   |   |   |   |   |   |   |   |   |   |   |   |   |   |   |   |   |   |   |   |   |   |   |   |   |   |   |   |   |   |   |   |   |   |   |   |   |   |   |   |   |   |   |   |   |   |   |   |   |   |   |   |   |   |   |   |   |   |   |   |   |   |   |   |   |   |   |   |   |   |   |   |   |   |   |   |   |   |   |   |   |   |   |   |   |   |   |   |   |   |   |   |   |   |   |   |   |   |   |   |   |   |   |   |   |   |   |   |   |   |   |   |   |   |   |   |   |   |   |   |   |   |   |   |   |   |   |   |   |
|                                                      |          | Section 1857 |        |        |        |        |         |        |                         |             |       |      |         |     |      |     |      |     |    |     |     |     |      |     |     |    |    |     |   |   |   |   |   |   |   |   |   |   |   |   |   |   |   |   |   |   |   |   |   |   |   |   |   |   |   |   |   |   |   |   |   |   |   |   |   |   |   |   |   |   |   |   |   |   |   |   |   |   |   |   |   |   |   |   |   |   |   |   |   |   |   |   |   |   |   |   |   |   |   |   |   |   |   |   |   |   |   |   |   |   |   |   |   |   |   |   |   |   |   |   |   |   |   |   |   |   |   |   |   |   |   |   |   |   |   |   |   |   |   |   |   |   |   |   |   |   |   |   |   |   |   |   |   |   |   |   |   |   |   |   |   |   |   |   |   |   |   |   |   |   |   |   |   |   |   |   |   |   |   |   |   |   |   |   |   |   |   |   |   |   |   |   |   |   |   |   |   |   |   |   |   |   |   |   |   |   |   |   |   |   |   |   |   |   |   |   |   |   |   |   |   |   |   |   |   |   |   |   |   |   |   |   |   |   |   |   |   |   |   |   |   |   |   |   |   |   |   |   |   |   |   |   |   |   |   |   |   |   |   |   |   |   |   |   |   |   |   |   |   |   |   |   |   |   |   |   |   |   |   |   |   |   |   |   |   |   |   |   |   |   |   |   |   |   |   |   |   |   |   |   |   |   |   |   |   |   |   |   |   |   |   |   |   |   |   |   |   |   |   |   |   |   |   |   |   |   |   |   |   |   |   |   |   |   |   |   |   |   |   |   |   |   |   |   |   |   |   |   |   |   |   |   |   |   |   |   |   |   |   |   |   |   |   |   |   |   |   |   |   |   |   |   |   |   |   |   |   |   |   |   |   |   |   |   |   |   |   |   |   |   |   |   |   |   |   |   |   |   |   |   |   |   |   |   |   |   |   |   |   |   |   |   |   |   |   |   |   |   |   |   |   |   |   |   |   |   |   |   |   |   |   |   |   |   |   |   |   |   |   |   |   |   |   |   |   |   |   |   |   |   |   |   |   |   |   |   |   |   |   |   |   |   |   |   |   |   |   |   |   |   |   |   |   |   |   |   |   |   |   |   |   |   |   |   |   |   |   |   |   |   |   |   |   |   |   |   |   |   |   |   |   |   |   |   |   |   |   |   |   |   |   |   |   |   |   |   |   |   |   |   |   |   |   |   |   |   |   |   |   |   |   |   |   |   |   |   |   |   |   |   |   |   |   |   |   |   |   |   |   |   |   |   |   |   |   |   |   |   |   |   |   |   |   |   |   |   |   |   |   |   |   |   |   |   |   |   |   |   |   |   |   |   |   |   |   |   |   |   |   |   |   |   |   |   |   |   |   |   |   |   |   |   |   |   |   |   |   |   |   |   |   |   |   |   |   |   |   |   |   |   |   |   |   |   |   |   |   |   |   |   |   |   |   |   |   |   |   |   |   |   |   |   |   |   |   |   |   |   |   |   |   |   |   |   |   |   |   |   |   |   |   |   |   |   |   |   |   |   |   |   |   |   |   |   |   |   |   |   |   |   |   |   |   |   |   |   |   |   |   |   |   |   |   |   |   |   |   |   |   |   |   |   |   |   |   |   |   |   |   |   |   |   |   |   |   |   |   |   |   |   |   |   |   |   |   |   |   |   |   |   |   |   |   |   |   |   |   |   |   |   |   |   |   |   |   |   |   |   |   |   |   |   |   |   |   |   |   |   |   |   |   |   |   |   |   |   |   |   |   |   |   |   |   |   |   |   |   |   |   |   |   |   |   |   |   |   |   |   |   |   |   |   |   |   |   |   |   |   |
|                                                      | (142913) | 142913       | 142923 | 142934 | 142945 | 142956 | 142967  | 142978 | 142989                  |             |       |      |         |     |      |     |      |     |    |     |     |     |      |     |     |    |    |     |   |   |   |   |   |   |   |   |   |   |   |   |   |   |   |   |   |   |   |   |   |   |   |   |   |   |   |   |   |   |   |   |   |   |   |   |   |   |   |   |   |   |   |   |   |   |   |   |   |   |   |   |   |   |   |   |   |   |   |   |   |   |   |   |   |   |   |   |   |   |   |   |   |   |   |   |   |   |   |   |   |   |   |   |   |   |   |   |   |   |   |   |   |   |   |   |   |   |   |   |   |   |   |   |   |   |   |   |   |   |   |   |   |   |   |   |   |   |   |   |   |   |   |   |   |   |   |   |   |   |   |   |   |   |   |   |   |   |   |   |   |   |   |   |   |   |   |   |   |   |   |   |   |   |   |   |   |   |   |   |   |   |   |   |   |   |   |   |   |   |   |   |   |   |   |   |   |   |   |   |   |   |   |   |   |   |   |   |   |   |   |   |   |   |   |   |   |   |   |   |   |   |   |   |   |   |   |   |   |   |   |   |   |   |   |   |   |   |   |   |   |   |   |   |   |   |   |   |   |   |   |   |   |   |   |   |   |   |   |   |   |   |   |   |   |   |   |   |   |   |   |   |   |   |   |   |   |   |   |   |   |   |   |   |   |   |   |   |   |   |   |   |   |   |   |   |   |   |   |   |   |   |   |   |   |   |   |   |   |   |   |   |   |   |   |   |   |   |   |   |   |   |   |   |   |   |   |   |   |   |   |   |   |   |   |   |   |   |   |   |   |   |   |   |   |   |   |   |   |   |   |   |   |   |   |   |   |   |   |   |   |   |   |   |   |   |   |   |   |   |   |   |   |   |   |   |   |   |   |   |   |   |   |   |   |   |   |   |   |   |   |   |   |   |   |   |   |   |   |   |   |   |   |   |   |   |   |   |   |   |   |   |   |   |   |   |   |   |   |   |   |   |   |   |   |   |   |   |   |   |   |   |   |   |   |   |   |   |   |   |   |   |   |   |   |   |   |   |   |   |   |   |   |   |   |   |   |   |   |   |   |   |   |   |   |   |   |   |   |   |   |   |   |   |   |   |   |   |   |   |   |   |   |   |   |   |   |   |   |   |   |   |   |   |   |   |   |   |   |   |   |   |   |   |   |   |   |   |   |   |   |   |   |   |   |   |   |   |   |   |   |   |   |   |   |   |   |   |   |   |   |   |   |   |   |   |   |   |   |   |   |   |   |   |   |   |   |   |   |   |   |   |   |   |   |   |   |   |   |   |   |   |   |   |   |   |   |   |   |   |   |   |   |   |   |   |   |   |   |   |   |   |   |   |   |   |   |   |   |   |   |   |   |   |   |   |   |   |   |   |   |   |   |   |   |   |   |   |   |   |   |   |   |   |   |   |   |   |   |   |   |   |   |   |   |   |   |   |   |   |   |   |   |   |   |   |   |   |   |   |   |   |   |   |   |   |   |   |   |   |   |   |   |   |   |   |   |   |   |   |   |   |   |   |   |   |   |   |   |   |   |   |   |   |   |   |   |   |   |   |   |   |   |   |   |   |   |   |   |   |   |   |   |   |   |   |   |   |   |   |   |   |   |   |   |   |   |   |   |   |   |   |   |   |   |   |   |   |   |   |   |   |   |   |   |   |   |   |   |   |   |   |   |   |   |   |   |   |   |   |   |   |   |   |   |   |   |   |   |   |   |   |   |   |   |   |   |   |   |   |   |   |   |   |   |   |   |   |   |   |   |   |   |   |   |   |   |   |   |   |   |   |   |   |   |   |   |   |   |   |
| Candidatus Carsonella ruddii strain BT chromosome... | (142758) | T            | G      | G      | A      | G      | A       | A      | T                       | T           | A     | A    | T       | T   | A    | T   | A    | A   | A  | G   | A   | T   | T    | T   | T   | C  | C  | A   | T | G | T | G | G | T | A | A | A | A | A | G | G | T | T |   |   |   |   |   |   |   |   |   |   |   |   |   |   |   |   |   |   |   |   |   |   |   |   |   |   |   |   |   |   |   |   |   |   |   |   |   |   |   |   |   |   |   |   |   |   |   |   |   |   |   |   |   |   |   |   |   |   |   |   |   |   |   |   |   |   |   |   |   |   |   |   |   |   |   |   |   |   |   |   |   |   |   |   |   |   |   |   |   |   |   |   |   |   |   |   |   |   |   |   |   |   |   |   |   |   |   |   |   |   |   |   |   |   |   |   |   |   |   |   |   |   |   |   |   |   |   |   |   |   |   |   |   |   |   |   |   |   |   |   |   |   |   |   |   |   |   |   |   |   |   |   |   |   |   |   |   |   |   |   |   |   |   |   |   |   |   |   |   |   |   |   |   |   |   |   |   |   |   |   |   |   |   |   |   |   |   |   |   |   |   |   |   |   |   |   |   |   |   |   |   |   |   |   |   |   |   |   |   |   |   |   |   |   |   |   |   |   |   |   |   |   |   |   |   |   |   |   |   |   |   |   |   |   |   |   |   |   |   |   |   |   |   |   |   |   |   |   |   |   |   |   |   |   |   |   |   |   |   |   |   |   |   |   |   |   |   |   |   |   |   |   |   |   |   |   |   |   |   |   |   |   |   |   |   |   |   |   |   |   |   |   |   |   |   |   |   |   |   |   |   |   |   |   |   |   |   |   |   |   |   |   |   |   |   |   |   |   |   |   |   |   |   |   |   |   |   |   |   |   |   |   |   |   |   |   |   |   |   |   |   |   |   |   |   |   |   |   |   |   |   |   |   |   |   |   |   |   |   |   |   |   |   |   |   |   |   |   |   |   |   |   |   |   |   |   |   |   |   |   |   |   |   |   |   |   |   |   |   |   |   |   |   |   |   |   |   |   |   |   |   |   |   |   |   |   |   |   |   |   |   |   |   |   |   |   |   |   |   |   |   |   |   |   |   |   |   |   |   |   |   |   |   |   |   |   |   |   |   |   |   |   |   |   |   |   |   |   |   |   |   |   |   |   |   |   |   |   |   |   |   |   |   |   |   |   |   |   |   |   |   |   |   |   |   |   |   |   |   |   |   |   |   |   |   |   |   |   |   |   |   |   |   |   |   |   |   |   |   |   |   |   |   |   |   |   |   |   |   |   |   |   |   |   |   |   |   |   |   |   |   |   |   |   |   |   |   |   |   |   |   |   |   |   |   |   |   |   |   |   |   |   |   |   |   |   |   |   |   |   |   |   |   |   |   |   |   |   |   |   |   |   |   |   |   |   |   |   |   |   |   |   |   |   |   |   |   |   |   |   |   |   |   |   |   |   |   |   |   |   |   |   |   |   |   |   |   |   |   |   |   |   |   |   |   |   |   |   |   |   |   |   |   |   |   |   |   |   |   |   |   |   |   |   |   |   |   |   |   |   |   |   |   |   |   |   |   |   |   |   |   |   |   |   |   |   |   |   |   |   |   |   |   |   |   |   |   |   |   |   |   |   |   |   |   |   |   |   |   |   |   |   |   |   |   |   |   |   |   |   |   |   |   |   |   |   |   |   |   |   |   |   |   |   |   |   |   |   |   |   |   |   |   |   |   |   |   |   |   |   |   |   |   |   |   |   |   |   |   |   |   |   |   |   |   |   |   |   |   |   |   |   |   |   |   |   |   |   |   |   |   |   |   |   |   |   |   |   |   |   |   |   |   |   |   |
| Candidatus Carsonella 135557 - 167442nt              | (7202)   | T            | G      | G      | A      | G      | A       | A      | T                       | T           | A     | A    | T       | T   | A    | T   | A    | A   | A  | G   | A   | T   | T    | T   | T   | C  | C  | A   | T | G | T | G | G | T | A | A | A | A | A | A | G | G | T | T |   |   |   |   |   |   |   |   |   |   |   |   |   |   |   |   |   |   |   |   |   |   |   |   |   |   |   |   |   |   |   |   |   |   |   |   |   |   |   |   |   |   |   |   |   |   |   |   |   |   |   |   |   |   |   |   |   |   |   |   |   |   |   |   |   |   |   |   |   |   |   |   |   |   |   |   |   |   |   |   |   |   |   |   |   |   |   |   |   |   |   |   |   |   |   |   |   |   |   |   |   |   |   |   |   |   |   |   |   |   |   |   |   |   |   |   |   |   |   |   |   |   |   |   |   |   |   |   |   |   |   |   |   |   |   |   |   |   |   |   |   |   |   |   |   |   |   |   |   |   |   |   |   |   |   |   |   |   |   |   |   |   |   |   |   |   |   |   |   |   |   |   |   |   |   |   |   |   |   |   |   |   |   |   |   |   |   |   |   |   |   |   |   |   |   |   |   |   |   |   |   |   |   |   |   |   |   |   |   |   |   |   |   |   |   |   |   |   |   |   |   |   |   |   |   |   |   |   |   |   |   |   |   |   |   |   |   |   |   |   |   |   |   |   |   |   |   |   |   |   |   |   |   |   |   |   |   |   |   |   |   |   |   |   |   |   |   |   |   |   |   |   |   |   |   |   |   |   |   |   |   |   |   |   |   |   |   |   |   |   |   |   |   |   |   |   |   |   |   |   |   |   |   |   |   |   |   |   |   |   |   |   |   |   |   |   |   |   |   |   |   |   |   |   |   |   |   |   |   |   |   |   |   |   |   |   |   |   |   |   |   |   |   |   |   |   |   |   |   |   |   |   |   |   |   |   |   |   |   |   |   |   |   |   |   |   |   |   |   |   |   |   |   |   |   |   |   |   |   |   |   |   |   |   |   |   |   |   |   |   |   |   |   |   |   |   |   |   |   |   |   |   |   |   |   |   |   |   |   |   |   |   |   |   |   |   |   |   |   |   |   |   |   |   |   |   |   |   |   |   |   |   |   |   |   |   |   |   |   |   |   |   |   |   |   |   |   |   |   |   |   |   |   |   |   |   |   |   |   |   |   |   |   |   |   |   |   |   |   |   |   |   |   |   |   |   |   |   |   |   |   |   |   |   |   |   |   |   |   |   |   |   |   |   |   |   |   |   |   |   |   |   |   |   |   |   |   |   |   |   |   |   |   |   |   |   |   |   |   |   |   |   |   |   |   |   |   |   |   |   |   |   |   |   |   |   |   |   |   |   |   |   |   |   |   |   |   |   |   |   |   |   |   |   |   |   |   |   |   |   |   |   |   |   |   |   |   |   |   |   |   |   |   |   |   |   |   |   |   |   |   |   |   |   |   |   |   |   |   |   |   |   |   |   |   |   |   |   |   |   |   |   |   |   |   |   |   |   |   |   |   |   |   |   |   |   |   |   |   |   |   |   |   |   |   |   |   |   |   |   |   |   |   |   |   |   |   |   |   |   |   |   |   |   |   |   |   |   |   |   |   |   |   |   |   |   |   |   |   |   |   |   |   |   |   |   |   |   |   |   |   |   |   |   |   |   |   |   |   |   |   |   |   |   |   |   |   |   |   |   |   |   |   |   |   |   |   |   |   |   |   |   |   |   |   |   |   |   |   |   |   |   |   |   |   |   |   |   |   |   |   |   |   |   |   |   |   |   |   |   |   |   |   |   |   |   |   |   |   |   |   |   |   |   |   |   |   |   |   |   |   |   |   |   |
| SARS-CoV-2 Reference Genome NC_045512.2              | (6795)   | T--          | A      | C      | A      | A      | T       | G      | T                       | G           | T     | A    | C       | T   | T    | T   | T    | A   | C  | T   | A   | G   | A    | G   | T   | A  | C  | A   | A | T | T | C | A | G | A | A | T | T | A | A | A | G | A | A | T | A |   |   |   |   |   |   |   |   |   |   |   |   |   |   |   |   |   |   |   |   |   |   |   |   |   |   |   |   |   |   |   |   |   |   |   |   |   |   |   |   |   |   |   |   |   |   |   |   |   |   |   |   |   |   |   |   |   |   |   |   |   |   |   |   |   |   |   |   |   |   |   |   |   |   |   |   |   |   |   |   |   |   |   |   |   |   |   |   |   |   |   |   |   |   |   |   |   |   |   |   |   |   |   |   |   |   |   |   |   |   |   |   |   |   |   |   |   |   |   |   |   |   |   |   |   |   |   |   |   |   |   |   |   |   |   |   |   |   |   |   |   |   |   |   |   |   |   |   |   |   |   |   |   |   |   |   |   |   |   |   |   |   |   |   |   |   |   |   |   |   |   |   |   |   |   |   |   |   |   |   |   |   |   |   |   |   |   |   |   |   |   |   |   |   |   |   |   |   |   |   |   |   |   |   |   |   |   |   |   |   |   |   |   |   |   |   |   |   |   |   |   |   |   |   |   |   |   |   |   |   |   |   |   |   |   |   |   |   |   |   |   |   |   |   |   |   |   |   |   |   |   |   |   |   |   |   |   |   |   |   |   |   |   |   |   |   |   |   |   |   |   |   |   |   |   |   |   |   |   |   |   |   |   |   |   |   |   |   |   |   |   |   |   |   |   |   |   |   |   |   |   |   |   |   |   |   |   |   |   |   |   |   |   |   |   |   |   |   |   |   |   |   |   |   |   |   |   |   |   |   |   |   |   |   |   |   |   |   |   |   |   |   |   |   |   |   |   |   |   |   |   |   |   |   |   |   |   |   |   |   |   |   |   |   |   |   |   |   |   |   |   |   |   |   |   |   |   |   |   |   |   |   |   |   |   |   |   |   |   |   |   |   |   |   |   |   |   |   |   |   |   |   |   |   |   |   |   |   |   |   |   |   |   |   |   |   |   |   |   |   |   |   |   |   |   |   |   |   |   |   |   |   |   |   |   |   |   |   |   |   |   |   |   |   |   |   |   |   |   |   |   |   |   |   |   |   |   |   |   |   |   |   |   |   |   |   |   |   |   |   |   |   |   |   |   |   |   |   |   |   |   |   |   |   |   |   |   |   |   |   |   |   |   |   |   |   |   |   |   |   |   |   |   |   |   |   |   |   |   |   |   |   |   |   |   |   |   |   |   |   |   |   |   |   |   |   |   |   |   |   |   |   |   |   |   |   |   |   |   |   |   |   |   |   |   |   |   |   |   |   |   |   |   |   |   |   |   |   |   |   |   |   |   |   |   |   |   |   |   |   |   |   |   |   |   |   |   |   |   |   |   |   |   |   |   |   |   |   |   |   |   |   |   |   |   |   |   |   |   |   |   |   |   |   |   |   |   |   |   |   |   |   |   |   |   |   |   |   |   |   |   |   |   |   |   |   |   |   |   |   |   |   |   |   |   |   |   |   |   |   |   |   |   |   |   |   |   |   |   |   |   |   |   |   |   |   |   |   |   |   |   |   |   |   |   |   |   |   |   |   |   |   |   |   |   |   |   |   |   |   |   |   |   |   |   |   |   |   |   |   |   |   |   |   |   |   |   |   |   |   |   |   |   |   |   |   |   |   |   |   |   |   |   |   |   |   |   |   |   |   |   |   |   |   |   |   |   |   |   |   |   |   |   |   |   |   |   |   |   |   |   |   |   |   |   |   |   |   |   |   |   |   |
|                                                      |          | Section 1858 |        |        |        |        |         |        |                         |             |       |      |         |     |      |     |      |     |    |     |     |     |      |     |     |    |    |     |   |   |   |   |   |   |   |   |   |   |   |   |   |   |   |   |   |   |   |   |   |   |   |   |   |   |   |   |   |   |   |   |   |   |   |   |   |   |   |   |   |   |   |   |   |   |   |   |   |   |   |   |   |   |   |   |   |   |   |   |   |   |   |   |   |   |   |   |   |   |   |   |   |   |   |   |   |   |   |   |   |   |   |   |   |   |   |   |   |   |   |   |   |   |   |   |   |   |   |   |   |   |   |   |   |   |   |   |   |   |   |   |   |   |   |   |   |   |   |   |   |   |   |   |   |   |   |   |   |   |   |   |   |   |   |   |   |   |   |   |   |   |   |   |   |   |   |   |   |   |   |   |   |   |   |   |   |   |   |   |   |   |   |   |   |   |   |   |   |   |   |   |   |   |   |   |   |   |   |   |   |   |   |   |   |   |   |   |   |   |   |   |   |   |   |   |   |   |   |   |   |   |   |   |   |   |   |   |   |   |   |   |   |   |   |   |   |   |   |   |   |   |   |   |   |   |   |   |   |   |   |   |   |   |   |   |   |   |   |   |   |   |   |   |   |   |   |   |   |   |   |   |   |   |   |   |   |   |   |   |   |   |   |   |   |   |   |   |   |   |   |   |   |   |   |   |   |   |   |   |   |   |   |   |   |   |   |   |   |   |   |   |   |   |   |   |   |   |   |   |   |   |   |   |   |   |   |   |   |   |   |   |   |   |   |   |   |   |   |   |   |   |   |   |   |   |   |   |   |   |   |   |   |   |   |   |   |   |   |   |   |   |   |   |   |   |   |   |   |   |   |   |   |   |   |   |   |   |   |   |   |   |   |   |   |   |   |   |   |   |   |   |   |   |   |   |   |   |   |   |   |   |   |   |   |   |   |   |   |   |   |   |   |   |   |   |   |   |   |   |   |   |   |   |   |   |   |   |   |   |   |   |   |   |   |   |   |   |   |   |   |   |   |   |   |   |   |   |   |   |   |   |   |   |   |   |   |   |   |   |   |   |   |   |   |   |   |   |   |   |   |   |   |   |   |   |   |   |   |   |   |   |   |   |   |   |   |   |   |   |   |   |   |   |   |   |   |   |   |   |   |   |   |   |   |   |   |   |   |   |   |   |   |   |   |   |   |   |   |   |   |   |   |   |   |   |   |   |   |   |   |   |   |   |   |   |   |   |   |   |   |   |   |   |   |   |   |   |   |   |   |   |   |   |   |   |   |   |   |   |   |   |   |   |   |   |   |   |   |   |   |   |   |   |   |   |   |   |   |   |   |   |   |   |   |   |   |   |   |   |   |   |   |   |   |   |   |   |   |   |   |   |   |   |   |   |   |   |   |   |   |   |   |   |   |   |   |   |   |   |   |   |   |   |   |   |   |   |   |   |   |   |   |   |   |   |   |   |   |   |   |   |   |   |   |   |   |   |   |   |   |   |   |   |   |   |   |   |   |   |   |   |   |   |   |   |   |   |   |   |   |   |   |   |   |   |   |   |   |   |   |   |   |   |   |   |   |   |   |   |   |   |   |   |   |   |   |   |   |   |   |   |   |   |   |   |   |   |   |   |   |   |   |   |   |   |   |   |   |   |   |   |   |   |   |   |   |   |   |   |   |   |   |   |   |   |   |   |   |   |   |   |   |   |   |   |   |   |   |   |   |   |   |   |   |   |   |   |   |   |   |   |   |   |   |   |   |   |   |   |   |   |   |   |   |   |   |   |   |   |   |   |   |   |   |   |   |   |   |   |
|                                                      | (142990) | 142990       | 143000 | 143011 | 143022 | 143033 | 143044  | 143055 | 143066                  |             |       |      |         |     |      |     |      |     |    |     |     |     |      |     |     |    |    |     |   |   |   |   |   |   |   |   |   |   |   |   |   |   |   |   |   |   |   |   |   |   |   |   |   |   |   |   |   |   |   |   |   |   |   |   |   |   |   |   |   |   |   |   |   |   |   |   |   |   |   |   |   |   |   |   |   |   |   |   |   |   |   |   |   |   |   |   |   |   |   |   |   |   |   |   |   |   |   |   |   |   |   |   |   |   |   |   |   |   |   |   |   |   |   |   |   |   |   |   |   |   |   |   |   |   |   |   |   |   |   |   |   |   |   |   |   |   |   |   |   |   |   |   |   |   |   |   |   |   |   |   |   |   |   |   |   |   |   |   |   |   |   |   |   |   |   |   |   |   |   |   |   |   |   |   |   |   |   |   |   |   |   |   |   |   |   |   |   |   |   |   |   |   |   |   |   |   |   |   |   |   |   |   |   |   |   |   |   |   |   |   |   |   |   |   |   |   |   |   |   |   |   |   |   |   |   |   |   |   |   |   |   |   |   |   |   |   |   |   |   |   |   |   |   |   |   |   |   |   |   |   |   |   |   |   |   |   |   |   |   |   |   |   |   |   |   |   |   |   |   |   |   |   |   |   |   |   |   |   |   |   |   |   |   |   |   |   |   |   |   |   |   |   |   |   |   |   |   |   |   |   |   |   |   |   |   |   |   |   |   |   |   |   |   |   |   |   |   |   |   |   |   |   |   |   |   |   |   |   |   |   |   |   |   |   |   |   |   |   |   |   |   |   |   |   |   |   |   |   |   |   |   |   |   |   |   |   |   |   |   |   |   |   |   |   |   |   |   |   |   |   |   |   |   |   |   |   |   |   |   |   |   |   |   |   |   |   |   |   |   |   |   |   |   |   |   |   |   |   |   |   |   |   |   |   |   |   |   |   |   |   |   |   |   |   |   |   |   |   |   |   |   |   |   |   |   |   |   |   |   |   |   |   |   |   |   |   |   |   |   |   |   |   |   |   |   |   |   |   |   |   |   |   |   |   |   |   |   |   |   |   |   |   |   |   |   |   |   |   |   |   |   |   |   |   |   |   |   |   |   |   |   |   |   |   |   |   |   |   |   |   |   |   |   |   |   |   |   |   |   |   |   |   |   |   |   |   |   |   |   |   |   |   |   |   |   |   |   |   |   |   |   |   |   |   |   |   |   |   |   |   |   |   |   |   |   |   |   |   |   |   |   |   |   |   |   |   |   |   |   |   |   |   |   |   |   |   |   |   |   |   |   |   |   |   |   |   |   |   |   |   |   |   |   |   |   |   |   |   |   |   |   |   |   |   |   |   |   |   |   |   |   |   |   |   |   |   |   |   |   |   |   |   |   |   |   |   |   |   |   |   |   |   |   |   |   |   |   |   |   |   |   |   |   |   |   |   |   |   |   |   |   |   |   |   |   |   |   |   |   |   |   |   |   |   |   |   |   |   |   |   |   |   |   |   |   |   |   |   |   |   |   |   |   |   |   |   |   |   |   |   |   |   |   |   |   |   |   |   |   |   |   |   |   |   |   |   |   |   |   |   |   |   |   |   |   |   |   |   |   |   |   |   |   |   |   |   |   |   |   |   |   |   |   |   |   |   |   |   |   |   |   |   |   |   |   |   |   |   |   |   |   |   |   |   |   |   |   |   |   |   |   |   |   |   |   |   |   |   |   |   |   |   |   |   |   |   |   |   |   |   |   |   |   |   |   |   |   |   |   |   |   |   |   |   |   |   |   |   |   |   |   |   |   |   |   |   |   |   |
| Candidatus Carsonella ruddii strain BT chromosome... | (142835) | A            | T      | T      | T      | A      | G       | A      | A                       | A           | T     | T    | G       | A   | A    | A   | A    | T   | A  | T   | A   | A   | A    | T   | A   | T  | A  | A   | A | A | T | A | A | A | A | A | A | A | A | A | A | A | A | A | A | A | A | A | A | A | A | A | A | A | A | A | A | A | A | A | A | A | A | A | A | A | A | A | A | A | A | A | A | A | A | A | A | A | A | A | A | A | A | A | A | A | A | A | A | A | A | A | A | A | A | A | A | A | A | A | A | A | A | A | A | A | A | A | A | A | A | A | A | A | A | A | A | A | A | A | A | A | A | A | A | A | A | A | A | A | A | A | A | A | A | A | A | A | A | A | A | A | A | A | A | A | A | A | A | A | A | A | A | A | A | A | A | A | A | A | A | A | A | A | A | A | A | A | A | A | A | A | A | A | A | A | A | A | A | A | A | A | A | A | A | A | A | A | A | A | A | A | A | A | A | A | A | A | A | A | A | A | A | A | A | A | A | A | A | A | A | A | A | A | A | A | A | A | A | A | A | A | A | A | A | A | A | A | A | A | A | A | A | A | A | A | A | A | A | A | A | A | A | A | A | A | A | A | A | A | A | A | A | A | A | A | A | A | A | A | A | A | A | A | A | A | A | A | A | A | A | A | A | A | A | A | A | A | A | A | A | A | A | A | A | A | A | A | A | A | A | A | A | A | A | A | A | A | A | A | A | A | A | A | A | A | A | A | A | A | A | A | A | A | A | A | A | A | A | A | A | A | A | A | A | A | A | A | A | A | A | A | A | A | A | A | A | A | A | A | A | A | A | A | A | A | A | A | A | A | A | A | A | A | A | A | A | A | A | A | A | A | A | A | A | A | A | A | A | A | A | A | A | A | A | A | A | A | A | A | A | A | A | A | A | A | A | A | A | A | A | A | A | A | A | A | A | A | A | A | A | A | A | A | A | A | A | A | A | A | A | A | A | A | A | A | A | A | A | A | A | A | A | A | A | A | A | A | A | A | A | A | A | A | A | A | A | A | A | A | A | A | A | A | A | A | A | A | A | A | A | A | A | A | A | A | A | A | A | A | A | A | A | A | A | A | A | A | A | A | A | A | A | A | A | A | A | A | A | A | A | A | A | A | A | A | A | A | A | A | A | A | A | A | A | A | A | A | A | A | A | A | A | A | A | A | A | A | A | A | A | A | A | A | A | A | A | A | A | A | A | A | A | A | A | A | A | A | A | A | A | A | A | A | A | A | A | A | A | A | A | A | A | A | A | A | A | A | A | A | A | A | A | A | A | A | A | A | A | A | A | A | A | A | A | A | A | A | A | A | A | A | A | A | A | A | A | A | A | A | A | A | A | A | A | A | A | A | A | A | A | A | A | A | A | A | A | A | A | A | A | A | A | A | A | A | A | A | A | A | A | A | A | A | A | A | A | A | A | A | A | A | A | A | A | A | A | A | A | A | A | A | A | A | A | A | A | A | A | A | A | A | A | A | A | A | A | A | A | A | A | A | A | A | A | A | A | A | A | A | A | A | A | A | A | A | A | A | A | A | A | A | A | A | A | A | A | A | A | A | A | A | A | A | A | A | A | A | A | A | A | A | A | A | A | A | A | A | A | A | A | A | A | A | A | A | A | A | A | A | A | A | A | A | A | A | A | A | A | A | A | A | A | A | A | A | A | A | A | A | A | A | A | A | A | A | A | A | A | A | A | A | A | A | A | A | A | A | A | A | A | A | A | A | A | A | A | A | A | A | A | A | A | A | A | A | A | A | A | A | A | A | A | A | A | A | A | A | A | A | A | A | A | A | A | A | A | A | A | A | A | A | A | A | A | A | A | A |

## SARS-CoV-2 &amp; Bakterien.apr

|                                                      |          |                                                                                   |        |        |        |        |        |        |        |        |
|------------------------------------------------------|----------|-----------------------------------------------------------------------------------|--------|--------|--------|--------|--------|--------|--------|--------|
|                                                      |          | Section 1861                                                                      |        |        |        |        |        |        |        |        |
|                                                      |          | (143221)                                                                          | 143221 | 143231 | 143242 | 143253 | 143264 | 143275 | 143286 | 143297 |
| Candidatus Carsonella ruddii strain BT chromosome... | (143065) | AAAAAGTTCAAAATTATTTTTTAATAAAAAAATTAAAAAAAATAAAAATTTTCATTTTTTTAAATAACAAAAAAGATTTAA |        |        |        |        |        |        |        |        |
| Candidatus Carsonella 135557 - 167442nt              | (7509)   | AAAAAGTTCAAAATTATTTTTTAATAAAAAAATTAAAAAAAATAAAAATTTTCATTTTTTTAAATAACAAAAAAGATTTAA |        |        |        |        |        |        |        |        |
| SARS-CoV-2 Reference Genome NC_045512.2              | (7086)   | CTAAATGTCATATTGCAACCTACTGTACTGGTTCTATACCTTGTAGTGT--TTGTCCTTAGT-----GTTTAG         |        |        |        |        |        |        |        |        |
|                                                      |          | Section 1862                                                                      |        |        |        |        |        |        |        |        |
|                                                      |          | (143298)                                                                          | 143298 | 143308 | 143319 | 143330 | 143341 | 143352 | 143363 | 143374 |
| Candidatus Carsonella ruddii strain BT chromosome... | (143142) | AATGTAAAATTAAATATAAATAAATAAATTTTAAAAATTAAAAAAAATATTAATTT-TATGAAAAATTTATTATAATT    |        |        |        |        |        |        |        |        |
| Candidatus Carsonella 135557 - 167442nt              | (7586)   | AATGTAAAATTAAATATAAATAAATAAATTTTAAAAATTAAAAAAAATATTAATTT-TATGAAAAATTTATTATAATT    |        |        |        |        |        |        |        |        |
| SARS-CoV-2 Reference Genome NC_045512.2              | (7152)   | ATTCT-----TTAGACACCTATCCCTTCCTTAGAACT-ATACAAATTAACCATTTCACTCTTTAAATGGGATTTAAC     |        |        |        |        |        |        |        |        |
|                                                      |          | Section 1863                                                                      |        |        |        |        |        |        |        |        |
|                                                      |          | (143375)                                                                          | 143375 | 143385 | 143396 | 143407 | 143418 | 143429 | 143440 | 143451 |
| Candidatus Carsonella ruddii strain BT chromosome... | (143218) | TTTTTATGTTTTTTTTTAAAAAATAATTTAAAAAATATTGGATTTTTTAAATTTTAAAAAATAAAATAATTAATTT      |        |        |        |        |        |        |        |        |
| Candidatus Carsonella 135557 - 167442nt              | (7662)   | TTTTTATGTTTTTTTTTAAAAAATAATTTAAAAAATATTGGATTTTTTAAATTTTAAAAAATAAAATAATTAATTT      |        |        |        |        |        |        |        |        |
| SARS-CoV-2 Reference Genome NC_045512.2              | (7223)   | GCTTTTGGCTTAGTTGCAGAGTGGTTTTTTGGCATA--TATTCTTTTACATAGGTTTTCCTATG---TACTTTGGATT-   |        |        |        |        |        |        |        |        |
|                                                      |          | Section 1864                                                                      |        |        |        |        |        |        |        |        |
|                                                      |          | (143452)                                                                          | 143452 | 143462 | 143473 | 143484 | 143495 | 143506 | 143517 | 143528 |
| Candidatus Carsonella ruddii strain BT chromosome... | (143295) | GGTATTGATCCTACATTT-TACTCAATTCATTTAGGTCATTTTTTTATTATAAATTTTTTTTTTTATTTGTTAAAAA     |        |        |        |        |        |        |        |        |
| Candidatus Carsonella 135557 - 167442nt              | (7739)   | GGTATTGATCCTACATTT-TACTCAATTCATTTAGGTCATTTTTTTATTATAAATTTTTTTTTTTATTTGTTAAAAA     |        |        |        |        |        |        |        |        |
| SARS-CoV-2 Reference Genome NC_045512.2              | (7294)   | GGCTGCAATCATGCAATTTGTTTTTCAGCTATTTTGCAGTACATTTTATTAGTAATTCTTGGCTTATGTGGTTAAATAA   |        |        |        |        |        |        |        |        |
|                                                      |          | Section 1865                                                                      |        |        |        |        |        |        |        |        |
|                                                      |          | (143529)                                                                          | 143529 | 143539 | 143550 | 143561 | 143572 | 143583 | 143594 | 143605 |
| Candidatus Carsonella ruddii strain BT chromosome... | (143371) | AAAATTTTTTATTTGTAAATTATAATAGGTGATTTCACTACTATCTTAAAAAATAAATAAATCAG-ATATTAT         |        |        |        |        |        |        |        |        |
| Candidatus Carsonella 135557 - 167442nt              | (7815)   | AAAATTTTTTATTTGTAAATTATAATAGGTGATTTCACTACTATCTTAAAAAATAAATAAATCAG-ATATTAT         |        |        |        |        |        |        |        |        |
| SARS-CoV-2 Reference Genome NC_045512.2              | (7371)   | TTAATCTTGTAAC----AAATGGCCCCG---ATTTCA--GCTATGGTTAGAAATGTAACATCTTCTTTGCAATCATTAT   |        |        |        |        |        |        |        |        |
|                                                      |          | Section 1866                                                                      |        |        |        |        |        |        |        |        |
|                                                      |          | (143606)                                                                          | 143606 | 143616 | 143627 | 143638 | 143649 | 143660 | 143671 | 143682 |
| Candidatus Carsonella ruddii strain BT chromosome... | (143447) | TTTAAATTCATTTGTTTAAAATCTCAATTTTATAATATATTAGGAGATGTTTATATTTTTTTAAATTCATATGGA       |        |        |        |        |        |        |        |        |
| Candidatus Carsonella 135557 - 167442nt              | (7891)   | TTTAAATTCATTTGTTTAAAATCTCAATTTTATAATATATTAGGAGATGTTTATATTTTTTTAAATTCATATGGA       |        |        |        |        |        |        |        |        |
| SARS-CoV-2 Reference Genome NC_045512.2              | (7439)   | TATGTATGGAAA-GTT----ATGTGCATGTTGTAG-ACGGTGTCAATTCATCAACTTGTATGATGTGTTACAACG       |        |        |        |        |        |        |        |        |

SARS-CoV-2 & Bakterien.apr

|                                                      |          | Section 1867 |           |         |         |          |        |         |         |          |       |
|------------------------------------------------------|----------|--------------|-----------|---------|---------|----------|--------|---------|---------|----------|-------|
|                                                      | (143683) | 143683       | 143693    | 143704  | 143715  | 143726   | 143737 | 143748  | 143759  |          |       |
| Candidatus Carsonella ruddii strain BT chromosome... | (143524) | TATATAAA     | AAAAATTT  | TTTTTT  | TTTTTAA | AAATATTT | TAAT-T | TATTAAT | GTTAAT  | AAATATAT | TC    |
| Candidatus Carsonella 135557 - 167442nt              | (7968)   | TATATAAA     | AAAAATTT  | TTTTTT  | TTTTTAA | AAATATTT | TAAT-T | TATTAAT | GTTAAT  | AAATATAT | TC    |
| SARS-CoV-2 Reference Genome NC_045512.2              | (7510)   | TA-ATA       | GAGCAACAA | GAGT    | CGAA    | TGTAC    | AACTAT | TGTTAAT | GGTGT   | TTAAGAGG | TCC   |
|                                                      |          | TTT-         | TATG      | TC      | TAT     | GCT      | AAT    | GG      |         |          |       |
|                                                      |          | Section 1868 |           |         |         |          |        |         |         |          |       |
|                                                      | (143760) | 143760       | 143770    | 143781  | 143792  | 143803   | 143814 | 143825  | 143836  |          |       |
| Candidatus Carsonella ruddii strain BT chromosome... | (143600) | AAAAAT       | TAGATAT   | TTTTTG  | CAAAA   | AAATTAA  | CATAA  | ATAAT   | TATTTAT | CCTTT    | TATT  |
| Candidatus Carsonella 135557 - 167442nt              | (8044)   | AAAAAT       | TAGATAT   | TTTTTG  | CAAAA   | AAATTAA  | CATAA  | ATAAT   | TATTTAT | CCTTT    | TATT  |
| SARS-CoV-2 Reference Genome NC_045512.2              | (7585)   | AGGTAA       | AAG---    | GCTTTTG | CAAACT  | ACAC     | AA     | TTGG    | AAT     | TGT      | GTTA  |
|                                                      |          | ATT          | GT        | GAT     | AC      | ATT      | CT     | GT      | GCT     | TGG      | TAG   |
|                                                      |          | TAC          | ATT       | T       |         |          |        |         |         |          |       |
|                                                      |          | Section 1869 |           |         |         |          |        |         |         |          |       |
|                                                      | (143837) | 143837       | 143847    | 143858  | 143869  | 143880   | 143891 | 143902  | 143913  |          |       |
| Candidatus Carsonella ruddii strain BT chromosome... | (143677) | TTATTAAT     | --GTT     | TATAGAA | TAGGTGG | TATAGAT  | CAATTG | TTGAAT  | TG-T    | TATT     | TG    |
| Candidatus Carsonella 135557 - 167442nt              | (8121)   | TTATTAAT     | --GTT     | TATAGAA | TAGGTGG | TATAGAT  | CAATTG | TTGAAT  | TG-T    | TATT     | TG    |
| SARS-CoV-2 Reference Genome NC_045512.2              | (7659)   | TTAGT        | GATGAA    | GTTG    | CGAGAG  | ACT      | TG     | TCAC    | TA      | CAGT     | TTAA  |
|                                                      |          | AG           | CA        | AA      | G       | CC       | AA     | T       | AA      | A        | T     |
|                                                      |          | CC           | TA        | C       | T       | G        | ACC    | AG      | T       | C        | T     |
|                                                      |          | T            | C         | T       | T       | C        | A      | T       | C       |          |       |
|                                                      |          | Section 1870 |           |         |         |          |        |         |         |          |       |
|                                                      | (143914) | 143914       | 143924    | 143935  | 143946  | 143957   | 143968 | 143979  | 143990  |          |       |
| Candidatus Carsonella ruddii strain BT chromosome... | (143751) | ATTTT        | TAAAAA    | AAAAAC  | AAATTT  | TAATTT   | GT     | TTTT    | TATT    | TAGAAAA  | AAAT  |
| Candidatus Carsonella 135557 - 167442nt              | (8195)   | ATTTT        | TAAAAA    | AAAAAC  | AAATTT  | TAATTT   | GT     | TTTT    | TATT    | TAGAAAA  | AAAT  |
| SARS-CoV-2 Reference Genome NC_045512.2              | (7736)   | GTT          | GAT       | AGT     | GAA     | GAAT     | GGT    | CCA     | T       | CCAT     | CTT   |
|                                                      |          | AC           | TT        | T       | GA      | T        | AAA    | G       | CT      | GG       | T     |
|                                                      |          | CA           | AAA       | G       | CT      | TT       | ATG    | AA      | G       | CA       | T     |
|                                                      |          | TT           | ATG       | AA      | G       | CA       | T      |         |         |          |       |
|                                                      |          | Section 1871 |           |         |         |          |        |         |         |          |       |
|                                                      | (143991) | 143991       | 144001    | 144012  | 144023  | 144034   | 144045 | 144056  | 144067  |          |       |
| Candidatus Carsonella ruddii strain BT chromosome... | (143828) | AAGT         | TTTT      | ----    | TTTT    | TATAA    | TAAAA  | AAATTT  | TAGATT  | TAAT     | TTTAT |
| Candidatus Carsonella 135557 - 167442nt              | (8272)   | AAGT         | TTTT      | ----    | TTTT    | TATAA    | TAAAA  | AAATTT  | TAGATT  | TAAT     | TTTAT |
| SARS-CoV-2 Reference Genome NC_045512.2              | (7813)   | TTC          | TCT       | TCT     | CA      | TTTT     | GT     | TAA     | CT      | TAG      | CA    |
|                                                      |          | AA           | CC        | T       | G       | AG       | GC     | TA      | AT      | AA       | CA    |
|                                                      |          | CT           | ---       | AAA     | GG      | TT       | CA     | TT      | GC      | CT       | AT    |
|                                                      |          | TAA          | TGT       | TA      |         |          |        |         |         |          |       |
|                                                      |          | Section 1872 |           |         |         |          |        |         |         |          |       |
|                                                      | (144068) | 144068       | 144078    | 144089  | 144100  | 144111   | 144122 | 144133  | 144144  |          |       |
| Candidatus Carsonella ruddii strain BT chromosome... | (143901) | TT           | TTTT      | AAA     | AGTT    | TACAAAA  | AAAA   | ----    | AAAA    | TTTAT    | TTTT  |
| Candidatus Carsonella 135557 - 167442nt              | (8345)   | TT           | TTTT      | AAA     | AGTT    | TACAAAA  | AAAA   | ----    | AAAA    | TTTAT    | TTTT  |
| SARS-CoV-2 Reference Genome NC_045512.2              | (7887)   | TAG          | TTTT      | TG      | AT      | GTA      | ATC    | AAAA    | TGTG    | AA       | GA    |



## SARS-CoV-2 &amp; Bakterien.apr

|                                                      |          |                                                                                  |        |        |        |        |        |        |               |
|------------------------------------------------------|----------|----------------------------------------------------------------------------------|--------|--------|--------|--------|--------|--------|---------------|
|                                                      |          | Section 1873                                                                     |        |        |        |        |        |        |               |
|                                                      |          | (144145)                                                                         | 144145 | 144155 | 144166 | 144177 | 144188 | 144199 | 144210 144221 |
| Candidatus Carsonella ruddii strain BT chromosome... | (143972) | TAAAAAATATTTTTTTTAAAAAAGAAATATTTAAGTTTATTATTTAAAAAATATTTTCAAAATAATAAAATT         |        |        |        |        |        |        |               |
| Candidatus Carsonella 135557 - 167442nt              | (8416)   | TAAAAAATATTTTTTTTAAAAAAGAAATATTTAAGTTTATTATTTAAAAAATATTTTCAAAATAATAAAATT         |        |        |        |        |        |        |               |
| SARS-CoV-2 Reference Genome NC_045512.2              | (7964)   | CAACCTATACGTTTAC TAGATCAGGCATTAGTGTCTGA-TGTTGGTGATAGTGCGGAAGTTGCAGTATA--AAA----  |        |        |        |        |        |        |               |
|                                                      |          | Section 1874                                                                     |        |        |        |        |        |        |               |
|                                                      |          | (144222)                                                                         | 144222 | 144232 | 144243 | 144254 | 144265 | 144276 | 144287 144298 |
| Candidatus Carsonella ruddii strain BT chromosome... | (144049) | TGTTTAATAATAATATTTATAAAAAAATTATTTATTTT--TAAAAAATTAAATAAAAAAATTTTATTAAAA          |        |        |        |        |        |        |               |
| Candidatus Carsonella 135557 - 167442nt              | (8493)   | TGTTTAATAATAATATTTATAAAAAAATTATTTATTTT--TAAAAAATTAAATAAAAAAATTTTATTAAAA          |        |        |        |        |        |        |               |
| SARS-CoV-2 Reference Genome NC_045512.2              | (8034)   | TGTTTGATGCTTACGTTATA CGTTTTCATCACCTTTAACGTACCAA TGGAA AAACTCAAA CAC TAGTTGCAACT  |        |        |        |        |        |        |               |
|                                                      |          | Section 1875                                                                     |        |        |        |        |        |        |               |
|                                                      |          | (144299)                                                                         | 144299 | 144309 | 144320 | 144331 | 144342 | 144353 | 144364 144375 |
| Candidatus Carsonella ruddii strain BT chromosome... | (144124) | AAAACAAATGTATAATTAAAAATTTTTTCATATTTATTTATATGATAAATAAAATTTTACTTTTTCTAAAAA         |        |        |        |        |        |        |               |
| Candidatus Carsonella 135557 - 167442nt              | (8568)   | AAAACAAATGTATAATTAAAAATTTTTTCATATTTATTTATATGATAAATAAAATTTTACTTTTTCTAAAAA         |        |        |        |        |        |        |               |
| SARS-CoV-2 Reference Genome NC_045512.2              | (8111)   | GCAAGAGCTGAACCTTGC AAAGAATGTGCTAG-A CAATGCTATCTA CTTTATTTCA GCAGCTCGGC AAGGTT    |        |        |        |        |        |        |               |
|                                                      |          | Section 1876                                                                     |        |        |        |        |        |        |               |
|                                                      |          | (144376)                                                                         | 144376 | 144386 | 144397 | 144408 | 144419 | 144430 | 144441 144452 |
| Candidatus Carsonella ruddii strain BT chromosome... | (144201) | ATCTTTTCTTAGGTTTC----CTCCAGATCCAAATGGATTTTTCATATAGGACATGTTTTAACATATTAATTAAT      |        |        |        |        |        |        |               |
| Candidatus Carsonella 135557 - 167442nt              | (8645)   | ATCTTTTCTTAGGTTTC----CTCCAGATCCAAATGGATTTTTCATATAGGACATGTTTTAACATATTAATTAAT      |        |        |        |        |        |        |               |
| SARS-CoV-2 Reference Genome NC_045512.2              | (8187)   | TTGTTGATTCAGATGTAGAAA CTAAAGATGTTGTGTAATGCTTAAATTTGTCACATCAATCTGACATAGAAGTTACT   |        |        |        |        |        |        |               |
|                                                      |          | Section 1877                                                                     |        |        |        |        |        |        |               |
|                                                      |          | (144453)                                                                         | 144453 | 144463 | 144474 | 144485 | 144496 | 144507 | 144518 144529 |
| Candidatus Carsonella ruddii strain BT chromosome... | (144274) | TTTTATTTATCAATTAAATAAAAGGAAAATTTATATTAAGATTTTGATAACACAAATTTAAAAAATTATAATTATT     |        |        |        |        |        |        |               |
| Candidatus Carsonella 135557 - 167442nt              | (8718)   | TTTTATTTATCAATTAAATAAAAGGAAAATTTATATTAAGATTTTGATAACACAAATTTAAAAAATTATAATTATT     |        |        |        |        |        |        |               |
| SARS-CoV-2 Reference Genome NC_045512.2              | (8264)   | GGCGATAGTTGTATAAATAAT--GCTCACCTATATAACAA-AGTTGA AACA TGA---CA CCCCCGTGACCTTGGTGC |        |        |        |        |        |        |               |
|                                                      |          | Section 1878                                                                     |        |        |        |        |        |        |               |
|                                                      |          | (144530)                                                                         | 144530 | 144540 | 144551 | 144562 | 144573 | 144584 | 144595 144606 |
| Candidatus Carsonella ruddii strain BT chromosome... | (144351) | TTTTTATAAATTTTATACAATATGATTTATTTATGTTAGGTATAAAA TGGAA TAAAAATAATTATTTTAAATTATA   |        |        |        |        |        |        |               |
| Candidatus Carsonella 135557 - 167442nt              | (8795)   | TTTTTATAAATTTTATACAATATGATTTATTTATGTTAGGTATAAAA TGGAA TAAAAATAATTATTTTAAATTATA   |        |        |        |        |        |        |               |
| SARS-CoV-2 Reference Genome NC_045512.2              | (8335)   | TTGTATTGACTGTAGTGCGCTCATAT-TAATGCGCAGGTAGC AAAA--AGTCA CAA CATTGCTTTGATATGGAACG  |        |        |        |        |        |        |               |

|                                                      |          |                                   |                            |                   |                  |                    |             |              |          |
|------------------------------------------------------|----------|-----------------------------------|----------------------------|-------------------|------------------|--------------------|-------------|--------------|----------|
|                                                      |          | Section 1879                      |                            |                   |                  |                    |             |              |          |
|                                                      | (144607) | 144607                            | 144617                     | 144628            | 144639           | 144650             | 144661      | 144672       | 144683   |
| Candidatus Carsonella ruddii strain BT chromosome... | (144428) | TAAATAAATTTTATTTTCATTTTGT         | TTTTTATTTTAA               | AAAAATTA          | AAAAATTTATTTT    | AAAAAAATTAATTTTAAT |             |              |          |
| Candidatus Carsonella 135557 - 167442nt              | (8872)   | TAAATAAATTTTATTTTCATTTTGT         | TTTTTATTTTAA               | AAAAATTA          | AAAAATTTATTTT    | AAAAAAATTAATTTTAAT |             |              |          |
| SARS-CoV-2 Reference Genome NC_045512.2              | (8409)   | TTAAAGATTTTCATGTCAT--TGTCTGAACAAC | TACGAAAACAAATACGTAGTGCTGCT | AAAAAGAA          | TAACTTACCT       |                    |             |              |          |
|                                                      |          | Section 1880                      |                            |                   |                  |                    |             |              |          |
|                                                      | (144684) | 144684                            | 144694                     | 144705            | 144716           | 144727             | 144738      | 144749       | 144760   |
| Candidatus Carsonella ruddii strain BT chromosome... | (144505) | AGAATTAAATTTTAATTATTTAAATTA       | AAAAAATAATTAATTTTATTTT     | TTTAA             | AAATGATTTTTTTTAA | AAAAA              |             |              |          |
| Candidatus Carsonella 135557 - 167442nt              | (8949)   | AGAATTAAATTTTAATTATTTAAATTA       | AAAAAATAATTAATTTTATTTT     | TTTAA             | AAATGATTTTTTTTAA | AAAAA              |             |              |          |
| SARS-CoV-2 Reference Genome NC_045512.2              | (8483)   | T---TTAAGTTGACATGTGCAAC           | TAC                        | TAGACAA           | GTGTGTAACA       | ----ACAAAGAT       | -----AGCACT |              |          |
|                                                      |          | Section 1881                      |                            |                   |                  |                    |             |              |          |
|                                                      | (144761) | 144761                            | 144771                     | 144782            | 144793           | 144804             | 144815      | 144826       | 144837   |
| Candidatus Carsonella ruddii strain BT chromosome... | (144582) | TTATTTTGT                         | TTTTTTTATTAA               | AAAAAAATTAATTTT   | TAGAA            | TTAAAAA            | AAATCAT     | TGGAATATTTTT | CCTA     |
| Candidatus Carsonella 135557 - 167442nt              | (9026)   | TTATTTTGT                         | TTTTTTTATTAA               | AAAAAAATTAATTTT   | TAGAA            | TTAAAAA            | AAATCAT     | TGGAATATTTTT | CCTA     |
| SARS-CoV-2 Reference Genome NC_045512.2              | (8545)   | TAAAGGGTGGTAAAA                   | TTGTTAA                    | T-----AAT         | TGGTTGAAGCAG     | TTAA               | TTAAAGTTACA | -CTTGTGTTCC  | TTTTTGTG |
|                                                      |          | Section 1882                      |                            |                   |                  |                    |             |              |          |
|                                                      | (144838) | 144838                            | 144848                     | 144859            | 144870           | 144881             | 144892      | 144903       | 144914   |
| Candidatus Carsonella ruddii strain BT chromosome... | (144659) | CTTATGATTTACACAAAGTATTAATG        | ATTATTTAATAATATAAATGTTT    | CTATTTGTACAAAGAA  | TTTTTAAAT        |                    |             |              |          |
| Candidatus Carsonella 135557 - 167442nt              | (9103)   | CTTATGATTTACACAAAGTATTAATG        | ATTATTTAATAATATAAATGTTT    | CTATTTGTACAAAGAA  | TTTTTAAAT        |                    |             |              |          |
| SARS-CoV-2 Reference Genome NC_045512.2              | (8616)   | CTGCTATTTTCATTTTAA                | TACACC                     | TGTTTCATGTCATAGTC | TAAACAT          | ---ACTGACTTTT      | CAGTGAAATC  | ---AT        |          |
|                                                      |          | Section 1883                      |                            |                   |                  |                    |             |              |          |
|                                                      | (144915) | 144915                            | 144925                     | 144936            | 144947           | 144958             | 144969      | 144980       | 144991   |
| Candidatus Carsonella ruddii strain BT chromosome... | (144736) | AATGTTAAATATATAACTATTTT           | TTTAAATATTTAAAAA           | AAATCTATCAATAGAA  | TTTTCTAA         | AAAAAATTT          |             |              |          |
| Candidatus Carsonella 135557 - 167442nt              | (9180)   | AATGTTAAATATATAACTATTTT           | TTTAAATATTTAAAAA           | AAATCTATCAATAGAA  | TTTTCTAA         | AAAAAATTT          |             |              |          |
| SARS-CoV-2 Reference Genome NC_045512.2              | (8686)   | AGGATACAAAGGCAT                   | TGATGGTGGTGTCACTCGTGACATA  | GC--ATCTACAGATA   | CTTGT            | TTTGCTAA           | CAACATGC    |              |          |
|                                                      |          | Section 1884                      |                            |                   |                  |                    |             |              |          |
|                                                      | (144992) | 144992                            | 145002                     | 145013            | 145024           | 145035             | 145046      | 145057       | 145068   |
| Candidatus Carsonella ruddii strain BT chromosome... | (144813) | TAAAAAATATAAATTCTAA               | AGAAAAATAAAAA              | TATTTT            | TTTAAATATATTTT   | TATTTTAAAAA        | ATAGGTT     |              |          |
| Candidatus Carsonella 135557 - 167442nt              | (9257)   | TAAAAAATATAAATTCTAA               | AGAAAAATAAAAA              | TATTTT            | TTTAAATATATTTT   | TATTTTAAAAA        | ATAGGTT     |              |          |
| SARS-CoV-2 Reference Genome NC_045512.2              | (8761)   | TGATTTTGAACA                      | TGGTTTAGCC                 | -AGCGTGGTGGT      | AGTATAC          | TAAAGCAAGC         | TTGCCCAT    | TGATTGCTGCA  | GTC      |

## SARS-CoV-2 &amp; Bakterien.apr

|                                                      |          |                                                                                 |        |        |        |        |        |        |        |        |  |
|------------------------------------------------------|----------|---------------------------------------------------------------------------------|--------|--------|--------|--------|--------|--------|--------|--------|--|
|                                                      |          | Section 1885                                                                    |        |        |        |        |        |        |        |        |  |
|                                                      |          | (145069)                                                                        | 145069 | 145079 | 145090 | 145101 | 145112 | 145123 | 145134 | 145145 |  |
| Candidatus Carsonella ruddii strain BT chromosome... | (144890) | TTAAATCCAAAAAATTTTATTTTTTATGTAATATAAATGGTGTTTTCAAAAAATAATATCTTTTATTGATTATAAAAAA |        |        |        |        |        |        |        |        |  |
| Candidatus Carsonella 135557 - 167442nt              | (9334)   | TTAAATCCAAAAAATTTTATTTTTTATGTAATATAAATGGTGTTTTCAAAAAATAATATCTTTTATTGATTATAAAAAA |        |        |        |        |        |        |        |        |  |
| SARS-CoV-2 Reference Genome NC_045512.2              | (8837)   | ATAA--CAAAGAGAGTGGGTTTTGTTCG-----TGCCGGGTGTGCCGTCGACATAT----TACGCACAACTAATGG    |        |        |        |        |        |        |        |        |  |
|                                                      |          | Section 1886                                                                    |        |        |        |        |        |        |        |        |  |
|                                                      |          | (145146)                                                                        | 145146 | 145156 | 145167 | 145178 | 145189 | 145200 | 145211 | 145222 |  |
| Candidatus Carsonella ruddii strain BT chromosome... | (144967) | ATTATTTTATCATTGAAAATTGAAAATAAATTTTTTAGAAAAATGTTTTTTATTGTTAAAAATTATATTAAAAATTT   |        |        |        |        |        |        |        |        |  |
| Candidatus Carsonella 135557 - 167442nt              | (9411)   | ATTATTTTATCATTGAAAATTGAAAATAAATTTTTTAGAAAAATGTTTTTTATTGTTAAAAATTATATTAAAAATTT   |        |        |        |        |        |        |        |        |  |
| SARS-CoV-2 Reference Genome NC_045512.2              | (8902)   | TGACTTTTTTGCACTTCTTAACCTAGAG---GTTTTTAGTGCAGTTGGTAACATCTGTTACACCACT--CAAAACTTA  |        |        |        |        |        |        |        |        |  |
|                                                      |          | Section 1887                                                                    |        |        |        |        |        |        |        |        |  |
|                                                      |          | (145223)                                                                        | 145223 | 145233 | 145244 | 145255 | 145266 | 145277 | 145288 | 145299 |  |
| Candidatus Carsonella ruddii strain BT chromosome... | (145044) | AAAAAAAATTTAATAATTAGTATTTTGTAAATGAAAAAAATATTAATTTAAAAATTGAATAATTTTTTAATAAATA    |        |        |        |        |        |        |        |        |  |
| Candidatus Carsonella 135557 - 167442nt              | (9488)   | AAAAAAAATTTAATAATTAGTATTTTGTAAATGAAAAAAATATTAATTTAAAAATTGAATAATTTTTTAATAAATA    |        |        |        |        |        |        |        |        |  |
| SARS-CoV-2 Reference Genome NC_045512.2              | (8973)   | TAGAGTACACTGACTTTTGCAACATCAGCTTG--TG-----TTTGGCTGCTGAATGTACAAATTTTT----AAAGA    |        |        |        |        |        |        |        |        |  |
|                                                      |          | Section 1888                                                                    |        |        |        |        |        |        |        |        |  |
|                                                      |          | (145300)                                                                        | 145300 | 145310 | 145321 | 145332 | 145343 | 145354 | 145365 | 145376 |  |
| Candidatus Carsonella ruddii strain BT chromosome... | (145121) | AAATAATAAAAAAAGTTTAAATAAGTTTAAATTATTCAAATTTAAAAAAAATTTTATTATTTAAAAAAAATATTT     |        |        |        |        |        |        |        |        |  |
| Candidatus Carsonella 135557 - 167442nt              | (9565)   | AAATAATAAAAAAAGTTTAAATAAGTTTAAATTATTCAAATTTAAAAAAAATTTTATTATTTAAAAAAAATATTT     |        |        |        |        |        |        |        |        |  |
| SARS-CoV-2 Reference Genome NC_045512.2              | (9037)   | TGCTTCGGTAAAGCCAGTACCATAAT-TGTTATGATACCAATGTACTAGAAAGGTTCTGTGCTTATGAAAGTTTACGC  |        |        |        |        |        |        |        |        |  |
|                                                      |          | Section 1889                                                                    |        |        |        |        |        |        |        |        |  |
|                                                      |          | (145377)                                                                        | 145377 | 145387 | 145398 | 145409 | 145420 | 145431 | 145442 | 145453 |  |
| Candidatus Carsonella ruddii strain BT chromosome... | (145198) | TTTAATAATTTTATTTTAAACATAAATTTTATTATATTAAAAAGAAATATCAAAAAATAATAAAAAAATTTTAA      |        |        |        |        |        |        |        |        |  |
| Candidatus Carsonella 135557 - 167442nt              | (9642)   | TTTAATAATTTTATTTTAAACATAAATTTTATTATATTAAAAAGAAATATCAAAAAATAATAAAAAAATTTTAA      |        |        |        |        |        |        |        |        |  |
| SARS-CoV-2 Reference Genome NC_045512.2              | (9113)   | CCTGACACACGTTATGTGCTCATGGATGGCTCTATTATATC-----AATTTCCTAACACC-----TACCTTGAA      |        |        |        |        |        |        |        |        |  |
|                                                      |          | Section 1890                                                                    |        |        |        |        |        |        |        |        |  |
|                                                      |          | (145454)                                                                        | 145454 | 145464 | 145475 | 145486 | 145497 | 145508 | 145519 | 145530 |  |
| Candidatus Carsonella ruddii strain BT chromosome... | (145275) | TATTAAAAAAAACATGTGTTTATATGAAAAATATATTAAAAATTAAAAAAAATATCTTTAAATATAAATTAATAAAC   |        |        |        |        |        |        |        |        |  |
| Candidatus Carsonella 135557 - 167442nt              | (9719)   | TATTAAAAAAAACATGTGTTTATATGAAAAATATATTAAAAATTAAAAAAAATATCTTTAAATATAAATTAATAAAC   |        |        |        |        |        |        |        |        |  |
| SARS-CoV-2 Reference Genome NC_045512.2              | (9176)   | GGTTC-----TGTTAGAGTGGTAAACAACTTTTGATTCTGAGTAC-TGTAGGCACGGCACTTGTGAAAGATC        |        |        |        |        |        |        |        |        |  |

## SARS-CoV-2 &amp; Bakterien.apr

|                                                      |          |                                                                                   |                                                                    |                                                                          |              |               |             |        |        |  |  |  |
|------------------------------------------------------|----------|-----------------------------------------------------------------------------------|--------------------------------------------------------------------|--------------------------------------------------------------------------|--------------|---------------|-------------|--------|--------|--|--|--|
|                                                      |          | Section 1891                                                                      |                                                                    |                                                                          |              |               |             |        |        |  |  |  |
|                                                      | (145531) | 145531                                                                            | 145541                                                             | 145552                                                                   | 145563       | 145574        | 145585      | 145596 | 145607 |  |  |  |
| Candidatus Carsonella ruddii strain BT chromosome... | (145352) | GGAA                                                                              | CATGGCGAAGTTTGGTATCGTATTTGCTTTGGGAGTAAGTGATCAAAGGTTCAAATCCTTTTGTTC | CCGAGCGT                                                                 |              |               |             |        |        |  |  |  |
| Candidatus Carsonella 135557 - 167442nt              | (9796)   | GGAA                                                                              | CATGGCGAAGTTTGGTATCGTATTTGCTTTGGGAGTAAGTGATCAAAGGTTCAAATCCTTTTGTTC | CCGAGCGT                                                                 |              |               |             |        |        |  |  |  |
| SARS-CoV-2 Reference Genome NC_045512.2              | (9241)   | AGAA                                                                              | GC                                                                 | TGGTGT--TTGTGTATCTACTAGTGGTAGATGGGTACTTAACAAATGATTATTACAGATCTTTACCAGGAGT |              |               |             |        |        |  |  |  |
|                                                      |          | Section 1892                                                                      |                                                                    |                                                                          |              |               |             |        |        |  |  |  |
|                                                      | (145608) | 145608                                                                            | 145618                                                             | 145629                                                                   | 145640       | 145651        | 145662      | 145673 | 145684 |  |  |  |
| Candidatus Carsonella ruddii strain BT chromosome... | (145429) | TTATAGCTCAATGGATAGAGCAATGATCTTCTAAGTCAAAGGTTGTAAGTTTCAATTCCTTACTAAACGTATGGTAAA    |                                                                    |                                                                          |              |               |             |        |        |  |  |  |
| Candidatus Carsonella 135557 - 167442nt              | (9873)   | TTATAGCTCAATGGATAGAGCAATGATCTTCTAAGTCAAAGGTTGTAAGTTTCAATTCCTTACTAAACGTATGGTAAA    |                                                                    |                                                                          |              |               |             |        |        |  |  |  |
| SARS-CoV-2 Reference Genome NC_045512.2              | (9316)   | TTTCTGTGGTGTTAGATGCTGTAA--ATTTACTTACTATAATATGTTTACACCACTAATTC AACCTATTGTGCTTTGGGA |                                                                    |                                                                          |              |               |             |        |        |  |  |  |
|                                                      |          | Section 1893                                                                      |                                                                    |                                                                          |              |               |             |        |        |  |  |  |
|                                                      | (145685) | 145685                                                                            | 145695                                                             | 145706                                                                   | 145717       | 145728        | 145739      | 145750 | 145761 |  |  |  |
| Candidatus Carsonella ruddii strain BT chromosome... | (145505) | TATAACTCAGTTGGTAGAGTAATGAATTGTGGATTTCATATGTC AAGGGTTCAACCCCCCTTTATTTAC            | CCTAATTATA                                                         |                                                                          |              |               |             |        |        |  |  |  |
| Candidatus Carsonella 135557 - 167442nt              | (9949)   | TATAACTCAGTTGGTAGAGTAATGAATTGTGGATTTCATATGTC AAGGGTTCAACCCCCCTTTATTTAC            | CCTAATTATA                                                         |                                                                          |              |               |             |        |        |  |  |  |
| SARS-CoV-2 Reference Genome NC_045512.2              | (9391)   | CATA--TCAGCATCTATAGTAGC---TGGTGGTATTGTAGCT-ATCGTAGTAACATGCCCTTGCC                 | TACT--ATTTTA                                                       |                                                                          |              |               |             |        |        |  |  |  |
|                                                      |          | Section 1894                                                                      |                                                                    |                                                                          |              |               |             |        |        |  |  |  |
|                                                      | (145762) | 145762                                                                            | 145772                                                             | 145783                                                                   | 145794       | 145805        | 145816      | 145827 | 145838 |  |  |  |
| Candidatus Carsonella ruddii strain BT chromosome... | (145582) | TAAAAATATAAAAAATGATATTTATTCCTACTGTTATAGACAAAAATATAAAAGGAGATAGATTTTTAGATT          | TTATTTT                                                            |                                                                          |              |               |             |        |        |  |  |  |
| Candidatus Carsonella 135557 - 167442nt              | (10026)  | TAAAAATATAAAAAATGATATTTATTCCTACTGTTATAGACAAAAATATAAAAGGAGATAGATTTTTAGATT          | TTATTTT                                                            |                                                                          |              |               |             |        |        |  |  |  |
| SARS-CoV-2 Reference Genome NC_045512.2              | (9459)   | TGAGGTTTAGAGAA-GCTTTTGGTGAA                                                       | TACAGTCATGTAGTTGCCCTTAA                                            | TACTTTACT-ATTCC                                                          | TTATGTCATTCA |               |             |        |        |  |  |  |
|                                                      |          | Section 1895                                                                      |                                                                    |                                                                          |              |               |             |        |        |  |  |  |
|                                                      | (145839) | 145839                                                                            | 145849                                                             | 145860                                                                   | 145871       | 145882        | 145893      | 145904 | 145915 |  |  |  |
| Candidatus Carsonella ruddii strain BT chromosome... | (145659) | CTAAAATGTTTAAAAGAAAGAGTAATTTTATTAATGGAGCTATAGATGATAATTTATCTGTTAT--AATAGTAGCTC     |                                                                    |                                                                          |              |               |             |        |        |  |  |  |
| Candidatus Carsonella 135557 - 167442nt              | (10103)  | CTAAAATGTTTAAAAGAAAGAGTAATTTTATTAATGGAGCTATAGATGATAATTTATCTGTTAT--AATAGTAGCTC     |                                                                    |                                                                          |              |               |             |        |        |  |  |  |
| SARS-CoV-2 Reference Genome NC_045512.2              | (9534)   | CTGTACTCTGTTTACACCAGT----                                                         | T-TACTCAT---                                                       | CT-TACC                                                                  | TGGTGT       | TTATCTGTTATTT | ACTTGTA     | CTTG   |        |  |  |  |
|                                                      |          | Section 1896                                                                      |                                                                    |                                                                          |              |               |             |        |        |  |  |  |
|                                                      | (145916) | 145916                                                                            | 145926                                                             | 145937                                                                   | 145948       | 145959        | 145970      | 145981 | 145992 |  |  |  |
| Candidatus Carsonella ruddii strain BT chromosome... | (145734) | AATTATTATTTT                                                                      | TAGATTCAGATAATAATAAAGATATAATTTTATATATTAATTCACCTGGAGGTGTAGTTTCTTCA  |                                                                          |              |               |             |        |        |  |  |  |
| Candidatus Carsonella 135557 - 167442nt              | (10178)  | AATTATTATTTT                                                                      | TAGATTCAGATAATAATAAAGATATAATTTTATATATTAATTCACCTGGAGGTGTAGTTTCTTCA  |                                                                          |              |               |             |        |        |  |  |  |
| SARS-CoV-2 Reference Genome NC_045512.2              | (9602)   | ACATTTTATCTT-----AC--TAAT                                                         | GATG-TTCTTTTT                                                      | TAGCA                                                                    | CATATTCA     | G-TGGATGGT    | TATGTTCA-CA |        |        |  |  |  |

## SARS-CoV-2 &amp; Bakterien.apr

|                                                      |          |                                                                                         |        |        |        |        |        |        |        |        |  |
|------------------------------------------------------|----------|-----------------------------------------------------------------------------------------|--------|--------|--------|--------|--------|--------|--------|--------|--|
|                                                      |          | Section 1897                                                                            |        |        |        |        |        |        |        |        |  |
|                                                      |          | (145993)                                                                                | 145993 | 146003 | 146014 | 146025 | 146036 | 146047 | 146058 | 146069 |  |
| Candidatus Carsonella ruddii strain BT chromosome... | (145811) | GGATTAAAGTATATATGATACAATACAATTTATAAAATCAGATGTAGTTACTATTTGTATAGGTC AAGCAGCTAGTAT         |        |        |        |        |        |        |        |        |  |
| Candidatus Carsonella 135557 - 167442nt              | (10255)  | GGATTAAAGTATATATGATACAATACAATTTATAAAATCAGATGTAGTTACTATTTGTATAGGTC AAGCAGCTAGTAT         |        |        |        |        |        |        |        |        |  |
| SARS-CoV-2 Reference Genome NC_045512.2              | (9665)   | CC-TT TAGTA C C T-TTC TGGATAACAATTGCTTATATC--A-----TTGTATTTCAC A-----AAGCAT-TTC TAT     |        |        |        |        |        |        |        |        |  |
|                                                      |          | Section 1898                                                                            |        |        |        |        |        |        |        |        |  |
|                                                      |          | (146070)                                                                                | 146070 | 146080 | 146091 | 146102 | 146113 | 146124 | 146135 | 146146 |  |
| Candidatus Carsonella ruddii strain BT chromosome... | (145888) | GGGAGCTGTTTTATTATCATCTGGTAAAAAAGGGAAAAGATTTTCTTTTACAAAATTCTAGAATAATGATTCCATCAAC         |        |        |        |        |        |        |        |        |  |
| Candidatus Carsonella 135557 - 167442nt              | (10332)  | GGGAGCTGTTTTATTATCATCTGGTAAAAAAGGGAAAAGATTTTCTTTTACAAAATTCTAGAATAATGATTCCATCAAC         |        |        |        |        |        |        |        |        |  |
| SARS-CoV-2 Reference Genome NC_045512.2              | (9728)   | TGGTTCT--TTAGTAATTAACCT-----AAA--GAGACGTG-TAGTCTTTA-----A---TGGTGTTC-----               |        |        |        |        |        |        |        |        |  |
|                                                      |          | Section 1899                                                                            |        |        |        |        |        |        |        |        |  |
|                                                      |          | (146147)                                                                                | 146147 | 146157 | 146168 | 146179 | 146190 | 146201 | 146212 | 146223 |  |
| Candidatus Carsonella ruddii strain BT chromosome... | (145965) | CTTTAGGTTATGCCACAAGGACAAGCTACAGATGTAGAAATACATGCCAAGAGAAATGATTATTGTTAAAAATATATTTA        |        |        |        |        |        |        |        |        |  |
| Candidatus Carsonella 135557 - 167442nt              | (10409)  | CTTTAGGTTATGCCACAAGGACAAGCTACAGATGTAGAAATACATGCCAAGAGAAATGATTATTGTTAAAAATATATTTA        |        |        |        |        |        |        |        |        |  |
| SARS-CoV-2 Reference Genome NC_045512.2              | (9778)   | CTTTAG-----TAGTTTGTGAAGAAGCTGC-GCTGTGCA C C TTTTGT TTAATAAAA GAAATGTATCTAAA GTT GCGTAG  |        |        |        |        |        |        |        |        |  |
|                                                      |          | Section 1900                                                                            |        |        |        |        |        |        |        |        |  |
|                                                      |          | (146224)                                                                                | 146224 | 146234 | 146245 | 146256 | 146267 | 146278 | 146289 | 146300 |  |
| Candidatus Carsonella ruddii strain BT chromosome... | (146042) | TG TAGTATTTTATCTTCTCATACAA-ATAATAG-TGTTGAAAAAATTTTCAAAGATACCGATCGTGATAAATTTTATG         |        |        |        |        |        |        |        |        |  |
| Candidatus Carsonella 135557 - 167442nt              | (10486)  | TG TAGTATTTTATCTTCTCATACAA-ATAATAG-TGTTGAAAAAATTTTCAAAGATACCGATCGTGATAAATTTTATG         |        |        |        |        |        |        |        |        |  |
| SARS-CoV-2 Reference Genome NC_045512.2              | (9850)   | TGATGTGCTATTACCTCTTACGCAATATAATAGATAC TTAGCTCTTTATAATAAGTACAGTATT--TTAGTGGAG-G          |        |        |        |        |        |        |        |        |  |
|                                                      |          | Section 1901                                                                            |        |        |        |        |        |        |        |        |  |
|                                                      |          | (146301)                                                                                | 146301 | 146311 | 146322 | 146333 | 146344 | 146355 | 146366 | 146377 |  |
| Candidatus Carsonella ruddii strain BT chromosome... | (146117) | GATTGTAAACAATCATTAAAAATATGGAATAATAGATAATGTTTGTATAAAAAAT-AATTATATTAAATA--TTGATT          |        |        |        |        |        |        |        |        |  |
| Candidatus Carsonella 135557 - 167442nt              | (10561)  | GATTGTAAACAATCATTAAAAATATGGAATAATAGATAATGTTTGTATAAAAAAT-AATTATATTAAATA--TTGATT          |        |        |        |        |        |        |        |        |  |
| SARS-CoV-2 Reference Genome NC_045512.2              | (9924)   | CAATGGATACAACTAGCTACAGAGAAGCTGCTTGTGTGTCATCTCGCAAGGCTCTCAATGACTTCAGTAAC TCAGGT          |        |        |        |        |        |        |        |        |  |
|                                                      |          | Section 1902                                                                            |        |        |        |        |        |        |        |        |  |
|                                                      |          | (146378)                                                                                | 146378 | 146388 | 146399 | 146410 | 146421 | 146432 | 146443 | 146454 |  |
| Candidatus Carsonella ruddii strain BT chromosome... | (146191) | TTTTAAATTATTTAAACCCAATAAATATAAAAAATGAATTAGAT-AGATATATTATTG-GTCAAAATGAAACTAAAA           |        |        |        |        |        |        |        |        |  |
| Candidatus Carsonella 135557 - 167442nt              | (10635)  | TTTTAAATTATTTAAACCCAATAAATATAAAAAATGAATTAGAT-AGATATATTATTG-GTCAAAATGAAACTAAAA           |        |        |        |        |        |        |        |        |  |
| SARS-CoV-2 Reference Genome NC_045512.2              | (10001)  | TCTGATGTTCTTTA---CCAA CCA CCA CAAA CC-TCTATCA C C T CAGCTGT T TGCAGAGTGGTTTTAGAAAAA TGG |        |        |        |        |        |        |        |        |  |

| Section 1903                                         |          |                                                   |                              |                               |                    |                                   |                           |           |        |         |
|------------------------------------------------------|----------|---------------------------------------------------|------------------------------|-------------------------------|--------------------|-----------------------------------|---------------------------|-----------|--------|---------|
|                                                      | (146455) | 146455                                            | 146465                       | 146476                        | 146487             | 146498                            | 146509                    | 146520    | 146531 |         |
| Candidatus Carsonella ruddii strain BT chromosome... | (146266) | AAATAATATCTGTTGCTGTTTATAATC                       | --                           | ATTATAAAAGACTTTATCTTTTACAATCA | ----               | AAAAATATTTATTT                    |                           |           |        |         |
| Candidatus Carsonella 135557 - 167442nt              | (10710)  | AAATAATATCTGTTGCTGTTTATAATC                       | --                           | ATTATAAAAGACTTTATCTTTTACAATCA | ----               | AAAAATATTTATTT                    |                           |           |        |         |
| SARS-CoV-2 Reference Genome NC_045512.2              | (10074)  | CATTCCCATCTGGTAAAGTTGAGGGTTGTATGGTACAAGTAACCT     | -                            | TGTGGTACAACTACACTTAA          | CGGTCTTTGGCT       |                                   |                           |           |        |         |
| Section 1904                                         |          |                                                   |                              |                               |                    |                                   |                           |           |        |         |
|                                                      | (146532) | 146532                                            | 146542                       | 146553                        | 146564             | 146575                            | 146586                    | 146597    | 146608 |         |
| Candidatus Carsonella ruddii strain BT chromosome... | (146336) | AGAAAAAGTAATATAATTTT                              | -                            | AATAGGTCCTA                   | -                  | CAGGATGTTGGTAAAACAT               | TGATGGTTAAAACATTAGCTAAGAT |           |        |         |
| Candidatus Carsonella 135557 - 167442nt              | (10780)  | AGAAAAAGTAATATAATTTT                              | -                            | AATAGGTCCTA                   | -                  | CAGGATGTTGGTAAAACAT               | TGATGGTTAAAACATTAGCTAAGAT |           |        |         |
| SARS-CoV-2 Reference Genome NC_045512.2              | (10150)  | TGATGAC-GTAGTTTACTGTCCAA                          | GACATGTGATCTGCACCTCTGAAGACAT | ----                          | GCTTA              | --                                | ACCTAATATGAA              |           |        |         |
| Section 1905                                         |          |                                                   |                              |                               |                    |                                   |                           |           |        |         |
|                                                      | (146609) | 146609                                            | 146619                       | 146630                        | 146641             | 146652                            | 146663                    | 146674    | 146685 |         |
| Candidatus Carsonella ruddii strain BT chromosome... | (146411) | AATTAACTCTCAATAATAGTTGTTGACGCTACTTCTTT            | -                            | TACTGAAGCAGGTTATGTTGGAG       | --                 | ATGATGTTGAAT                      |                           |           |        |         |
| Candidatus Carsonella 135557 - 167442nt              | (10855)  | AATTAACTCTCAATAATAGTTGTTGACGCTACTTCTTT            | -                            | TACTGAAGCAGGTTATGTTGGAG       | --                 | ATGATGTTGAAT                      |                           |           |        |         |
| SARS-CoV-2 Reference Genome NC_045512.2              | (10220)  | GATT--TACTC-ATTCTGTAAGTCTAATCATAATTCTTGGTACAG     | --                           | GCTGGTAAATGTTCACTCAGGTTATTTGA |                    |                                   |                           |           |        |         |
| Section 1906                                         |          |                                                   |                              |                               |                    |                                   |                           |           |        |         |
|                                                      | (146686) | 146686                                            | 146696                       | 146707                        | 146718             | 146729                            | 146740                    | 146751    | 146762 |         |
| Candidatus Carsonella ruddii strain BT chromosome... | (146485) | CAATTATTCAAAAATTGCTTCATGAATGTGAATATGATGTTGAATTAAC | TGAAAGATATAATATATATTGATGAA   |                               |                    |                                   |                           |           |        |         |
| Candidatus Carsonella 135557 - 167442nt              | (10929)  | CAATTATTCAAAAATTGCTTCATGAATGTGAATATGATGTTGAATTAAC | TGAAAGATATAATATATATTGATGAA   |                               |                    |                                   |                           |           |        |         |
| SARS-CoV-2 Reference Genome NC_045512.2              | (10292)  | CATTCTATGCAAAAATTG                                | ----                         | TGTA                          | CTTAAGCTTAAGGTTGAT | ---                               | ACAGCCATCCTAAGACACC       | TAGTATAG  |        |         |
| Section 1907                                         |          |                                                   |                              |                               |                    |                                   |                           |           |        |         |
|                                                      | (146763) | 146763                                            | 146773                       | 146784                        | 146795             | 146806                            | 146817                    | 146828    | 146839 |         |
| Candidatus Carsonella ruddii strain BT chromosome... | (146562) | ATTGATAAAATTTCTAAAAAACAGATTTTAT                   | ----                         | TTCTGG                        | --                 | GTAAAGATGTTTCAGGAGAAGGAGTTCAACAAT |                           |           |        |         |
| Candidatus Carsonella 135557 - 167442nt              | (11006)  | ATTGATAAAATTTCTAAAAAACAGATTTTAT                   | ----                         | TTCTGG                        | --                 | GTAAAGATGTTTCAGGAGAAGGAGTTCAACAAT |                           |           |        |         |
| SARS-CoV-2 Reference Genome NC_045512.2              | (10361)  | TTGTTCGCAATT-CACCAGGACAGAC                        | TTTT                         | TCAGTGT                       | TAGCTTGT           | TACAATGTTCA                       | CCATCTGGT                 | TTTAC     | CAAT   |         |
| Section 1908                                         |          |                                                   |                              |                               |                    |                                   |                           |           |        |         |
|                                                      | (146840) | 146840                                            | 146850                       | 146861                        | 146872             | 146883                            | 146894                    | 146905    | 146916 |         |
| Candidatus Carsonella ruddii strain BT chromosome... | (146632) | CTT-TATTAAAATTAATTGAAGGAATTAGCATTATG              | --                           | TTACTTCATTAAATGATAAAAAAAAT    | CCTCAACAAAAT       |                                   |                           |           |        |         |
| Candidatus Carsonella 135557 - 167442nt              | (11076)  | CTT-TATTAAAATTAATTGAAGGAATTAGCATTATG              | --                           | TTACTTCATTAAATGATAAAAAAAAT    | CCTCAACAAAAT       |                                   |                           |           |        |         |
| SARS-CoV-2 Reference Genome NC_045512.2              | (10437)  | GTGC                                              | TATGAGGCCCAATTTC             | ACTATTAGGGTT                  | CAT                | TCC                               | TTAATGGTTCATGTGTG         | TAGTGTGGT | TTTAA  | CATAGAT |

## SARS-CoV-2 &amp; Bakterien.apr

|                                                      |          |                     |                     |                       |                                                    |           |              |                  |                                               |  |
|------------------------------------------------------|----------|---------------------|---------------------|-----------------------|----------------------------------------------------|-----------|--------------|------------------|-----------------------------------------------|--|
|                                                      |          |                     | Section 1909        |                       |                                                    |           |              |                  |                                               |  |
|                                                      | (146917) | 146917              | 146927              | 146938                | 146949                                             | 146960    | 146971       | 146982           | 146993                                        |  |
| Candidatus Carsonella ruddii strain BT chromosome... | (146706) | CCTCAA              | GT                  | TTTTAATGTAGATACAACA   | AATATATTATTTATAGCTGGTGGAGCTTTTTTCAGGTATAGAAAATTTTA |           |              |                  |                                               |  |
| Candidatus Carsonella 135557 - 167442nt              | (11150)  | CCTCAA              | GT                  | TTTTAATGTAGATACAACA   | AATATATTATTTATAGCTGGTGGAGCTTTTTTCAGGTATAGAAAATTTTA |           |              |                  |                                               |  |
| SARS-CoV-2 Reference Genome NC_045512.2              | (10514)  | TATGACTGTGTCCTTTTGT | TACA                | TGCACC                | ATATGGAA                                           | TACCAAC   | TGGAGT       | CATGCTGGCAC      | AGA--C----                                    |  |
|                                                      |          |                     | Section 1910        |                       |                                                    |           |              |                  |                                               |  |
|                                                      | (146994) | 146994              | 147004              | 147015                | 147026                                             | 147037    | 147048       | 147059           | 147070                                        |  |
| Candidatus Carsonella ruddii strain BT chromosome... | (146782) | TTTAAATAGAA         | TAGATAAAGA          | AATATTCTTT            | TTTAGATAAATAAGATAATAAAAAATATTATTGAAAAAACTGATACT    |           |              |                  |                                               |  |
| Candidatus Carsonella 135557 - 167442nt              | (11226)  | TTTAAATAGAA         | TAGATAAAGA          | AATATTCTTT            | TTTAGATAAATAAGATAATAAAAAATATTATTGAAAAAACTGATACT    |           |              |                  |                                               |  |
| SARS-CoV-2 Reference Genome NC_045512.2              | (10583)  | -TTAGAA             | GGTAA               | CTTTTAT               | TGGA                                               | CCTTTT    | TGTGACAGGCA  | AAACAGCACAGCAGC  | TGGTACGGAACAACTATTACA                         |  |
|                                                      |          |                     | Section 1911        |                       |                                                    |           |              |                  |                                               |  |
|                                                      | (147071) | 147071              | 147081              | 147092                | 147103                                             | 147114    | 147125       | 147136           | 147147                                        |  |
| Candidatus Carsonella ruddii strain BT chromosome... | (146859) | GAAGATT             | TAAATAAATTT         | PGGTATTATTCT          | TGAATTTTAGGTAGATTACCTATTTTAGCTAAATTTAGAGAATT-AA    |           |              |                  |                                               |  |
| Candidatus Carsonella 135557 - 167442nt              | (11303)  | GAAGATT             | TAAATAAATTT         | TGGTATTATTCT          | TGAATTTTAGGTAGATTACCTATTTTAGCTAAATTTAGAGAATT-AA    |           |              |                  |                                               |  |
| SARS-CoV-2 Reference Genome NC_045512.2              | (10658)  | GTTAAT              | GT                  | TTT                   | TAGCT--                                            | TGGT      | TG           | TACGCTGCTGTTATAA | TGGAG-ACAGGTGGTTTCTCAATCGATTTACCACAA          |  |
|                                                      |          |                     | Section 1912        |                       |                                                    |           |              |                  |                                               |  |
|                                                      | (147148) | 147148              | 147158              | 147169                | 147180                                             | 147191    | 147202       | 147213           | 147224                                        |  |
| Candidatus Carsonella ruddii strain BT chromosome... | (146935) | CTGAATTTGA          | ATTTATTTATATATTAATA | AAAAATCTAAAAATTCATTAT | TAAAACAATTTTGTTATTTATTTTTTAATA                     |           |              |                  |                                               |  |
| Candidatus Carsonella 135557 - 167442nt              | (11379)  | CTGAATTTGA          | ATTTATTTATATATTAATA | AAAAATCTAAAAATTCATTAT | TAAAACAATTTTGTTATTTATTTTTTAATA                     |           |              |                  |                                               |  |
| SARS-CoV-2 Reference Genome NC_045512.2              | (10731)  | CTCTTAAT            | TGAC                | TTTAACTT              | TGTGGCTAT                                          | GAAGTACAA | TTTATGACCTC  | TAAACAA          | GAG--CCATGTTGACATAC                           |  |
|                                                      |          |                     | Section 1913        |                       |                                                    |           |              |                  |                                               |  |
|                                                      | (147225) | 147225              | 147235              | 147246                | 147257                                             | 147268    | 147279       | 147290           | 147301                                        |  |
| Candidatus Carsonella ruddii strain BT chromosome... | (147012) | GAGGAGT             | TAAGTATTAAATTT      | TACTTTTTCATCTATA      | AAAAGAAATTGCTAAAATAGCTGT-TAATAAAAAAATTTGGAG        |           |              |                  |                                               |  |
| Candidatus Carsonella 135557 - 167442nt              | (11456)  | GAGGAGT             | TAAGTATTAAATTT      | TACTTTTTCATCTATA      | AAAAGAAATTGCTAAAATAGCTGT-TAATAAAAAAATTTGGAG        |           |              |                  |                                               |  |
| SARS-CoV-2 Reference Genome NC_045512.2              | (10805)  | GGA                 | CCTCTT              | CTTCTCAA              | ACTTGGAA                                           | TTGCGT    | TTTAGATATGTG | TGCTTCATTAAA     | GAACTTACTGCAAAATGTTAT                         |  |
|                                                      |          |                     | Section 1914        |                       |                                                    |           |              |                  |                                               |  |
|                                                      | (147302) | 147302              | 147312              | 147323                | 147334                                             | 147345    | 147356       | 147367           | 147378                                        |  |
| Candidatus Carsonella ruddii strain BT chromosome... | (147088) | CAAGAGGTTT          | TAAAAATCAATATTA     | GAAAAATGTTCTTTT       | TAAATACAATGTTTTTATTTCCCTTCTAAAATTAATTTAAAA         |           |              |                  |                                               |  |
| Candidatus Carsonella 135557 - 167442nt              | (11532)  | CAAGAGGTTT          | TAAAAATCAATATTA     | GAAAAATGTTCTTTT       | TAAATACAATGTTTTTATTTCCCTTCTAAAATTAATTTAAAA         |           |              |                  |                                               |  |
| SARS-CoV-2 Reference Genome NC_045512.2              | (10882)  | GAA                 | TG                  | GACGTA                | ---                                                | CCATATT   | GGGTAGTG     | --               | CTTTATTAGAAGATGAATTTACA-CCTTTTGATGTTGTTAGACAA |  |

SARS-CoV-2 & Bakterien.apr

|                                                      |          |                                                 |                                                   |                         |                                |                       |              |         |            |              |
|------------------------------------------------------|----------|-------------------------------------------------|---------------------------------------------------|-------------------------|--------------------------------|-----------------------|--------------|---------|------------|--------------|
|                                                      | (147379) | 147379                                          | 147389                                            | 147400                  | 147411                         | 147422                | 147433       | 147444  | 147455     | Section 1915 |
| Candidatus Carsonella ruddii strain BT chromosome... | (147165) | T TAGTAGTAATTTTATAAAGAAAGTTATTACAAAAAATAAAAAACC | AATATTTTATTTATAATTAATGTTTTTTGT                    | TTTG                    |                                |                       |              |         |            |              |
| Candidatus Carsonella 135557 - 167442nt              | (11609)  | T TAGTAGTAATTTTATAAAGAAAGTTATTACAAAAAATAAAAAACC | AATATTTTATTTATAATTAATGTTTTTTGT                    | TTTG                    |                                |                       |              |         |            |              |
| SARS-CoV-2 Reference Genome NC_045512.2              | (10952)  | T GCTCAGGTGGTTACTTTCCAAA---AGTGCAGTGA---AAA     | GACAATCAAGGGTACACACCAC                            | TGTTGTTACT---           |                                |                       |              |         |            |              |
|                                                      | (147456) | 147456                                          | 147466                                            | 147477                  | 147488                         | 147499                | 147510       | 147521  | 147532     | Section 1916 |
| Candidatus Carsonella ruddii strain BT chromosome... | (147242) | TTTCACACATTTTTTTTTATTTT                         | TTTTTTTTTTTTAAAAAATAAATATTTTTTTTATAATAATAAAAAAAAA |                         |                                |                       |              |         |            |              |
| Candidatus Carsonella 135557 - 167442nt              | (11686)  | TTTCACACATTTTTTTTTATTTT                         | TTTTTTTTTTTTAAAAAATAAATATTTTTTTTATAATAATAAAAAAAAA |                         |                                |                       |              |         |            |              |
| SARS-CoV-2 Reference Genome NC_045512.2              | (11020)  | ----CACAA                                       | TTTTGAC--TTCAC                                    | TTTTAGTTT               | TAGTCCAGAGTACT                 | CAATGGTCTTTGTTCTT---- | TT-----      |         |            |              |
|                                                      | (147533) | 147533                                          | 147543                                            | 147554                  | 147565                         | 147576                | 147587       | 147598  | 147609     | Section 1917 |
| Candidatus Carsonella ruddii strain BT chromosome... | (147319) | AAATTTT                                         | TTTTAAAAATACAAATTTT---                            | TTTTTAAATGGTTATTT       | TTTTTTTTTAAATTTATTTAAATCTATTTT | TTTA                  |              |         |            |              |
| Candidatus Carsonella 135557 - 167442nt              | (11763)  | AAATTTT                                         | TTTTAAAAATACAAATTTT---                            | TTTTTAAATGGTTATTT       | TTTTTTTTTAAATTTATTTAAATCTATTTT | TTTA                  |              |         |            |              |
| SARS-CoV-2 Reference Genome NC_045512.2              | (11079)  | --TTTTG                                         | TATGAAAATGCC                                      | TTTTACC                 | TTTTGCTATGGGTATT               | ATTGCTATGTC           | TGCTGCTTT    | TGC     | AATGATGTTG | TC           |
|                                                      | (147610) | 147610                                          | 147620                                            | 147631                  | 147642                         | 147653                | 147664       | 147675  | 147686     | Section 1918 |
| Candidatus Carsonella ruddii strain BT chromosome... | (147393) | TGCTAAAAAATATATTTT                              | TTTCCAATTTTATATTAATTA                             | AAAAATGATTTTTTAGG       | AAAAAAATTTAT                   | AAATTTAT              | TAA          |         |            |              |
| Candidatus Carsonella 135557 - 167442nt              | (11837)  | TGCTAAAAAATATATTTT                              | TTTCCAATTTTATATTAATTA                             | AAAAATGATTTTTTAGG       | AAAAAAATTTAT                   | AAATTTAT              | TAA          |         |            |              |
| SARS-CoV-2 Reference Genome NC_045512.2              | (11154)  | AAATAT                                          | AAGCATGCATTTCT---                                 | CTGTTTGTTT              | TGTTTACCTTCTCT                 | TGCGCACTGT            | AGCTTATTT    | TAAAT   | ATGGTC     | TT           |
|                                                      | (147687) | 147687                                          | 147697                                            | 147708                  | 147719                         | 147730                | 147741       | 147752  | 147763     | Section 1919 |
| Candidatus Carsonella ruddii strain BT chromosome... | (147470) | AATATAAATCTATTTATGTATTATT                       | TATTTAATAATTGAT                                   | AAAATGGTTCTTTAATTTTTTTT | TATTTTTTAAAA                   |                       |              |         |            |              |
| Candidatus Carsonella 135557 - 167442nt              | (11914)  | AATATAAATCTATTTATGTATTATT                       | TATTTAATAATTGAT                                   | AAAATGGTTCTTTAATTTTTTTT | TATTTTTTAAAA                   |                       |              |         |            |              |
| SARS-CoV-2 Reference Genome NC_045512.2              | (11226)  | -ATATGCC                                        | TGCTAGTTGGGTGAT                                   | GCGTATT                 | ATGACATGTT                     | TGGATATGGTTGA         | TACTAGTTTGTC | TGG     | TTTTAG     | GCT          |
|                                                      | (147764) | 147764                                          | 147774                                            | 147785                  | 147796                         | 147807                | 147818       | 147829  | 147840     | Section 1920 |
| Candidatus Carsonella ruddii strain BT chromosome... | (147547) | AATATTTT                                        | TTTTATAAATTTATAAATAATAGTAAATTTTT                  | TGTTAAATATAAGAAATCATCA  | AAAAAATTTGTTTATATAGA           |                       |              |         |            |              |
| Candidatus Carsonella 135557 - 167442nt              | (11991)  | AATATTTT                                        | TTTTATAAATTTATAAATAATAGTAAATTTTT                  | TGTTAAATATAAGAAATCATCA  | AAAAAATTTGTTTATATAGA           |                       |              |         |            |              |
| SARS-CoV-2 Reference Genome NC_045512.2              | (11302)  | AAAA                                            | GACTGTGT-TATGTATGCAT                              | CAGCTGTAGT              | GTTACTAATCCTTAT                | GACAGC----            | AAGAAC       | TGTGTAT | GATGA      |              |



## SARS-CoV-2 &amp; Bakterien.apr

|                                                      |          | Section 1921 |                                                                                  |        |        |        |        |        |               |
|------------------------------------------------------|----------|--------------|----------------------------------------------------------------------------------|--------|--------|--------|--------|--------|---------------|
|                                                      |          | (147841)     | 147841                                                                           | 147851 | 147862 | 147873 | 147884 | 147895 | 147906 147917 |
| Candidatus Carsonella ruddii strain BT chromosome... | (147624) |              | TAAATAAAATCTTGTGGATTGGAGGAAATAAATATTGGTATAGAATATTTAGGAATAGATTCTAATTTTGGGAATATGG- |        |        |        |        |        |               |
| Candidatus Carsonella 135557 - 167442nt              | (12068)  |              | TAAATAAAATCTTGTGGATTGGAGGAAATAAATATTGGTATAGAATATTTAGGAATAGATTCTAATTTTGGGAATATGG- |        |        |        |        |        |               |
| SARS-CoV-2 Reference Genome NC_045512.2              | (11374)  |              | TGGT----GCTAGGAGAGTGTGGACACTTATGAATGTCCTTGA-----CACTCGTTTATAAAGTTT-ATTATGGT      |        |        |        |        |        |               |
|                                                      |          | Section 1922 |                                                                                  |        |        |        |        |        |               |
|                                                      |          | (147918)     | 147918                                                                           | 147928 | 147939 | 147950 | 147961 | 147972 | 147983 147994 |
| Candidatus Carsonella ruddii strain BT chromosome... | (147700) |              | AATGATATTCATTGTAAATTAATAATGTTTATTTTAAATTATTTTAAAAAAATATTTACTTTTAAAAAATAATTT      |        |        |        |        |        |               |
| Candidatus Carsonella 135557 - 167442nt              | (12144)  |              | AATGATATTCATTGTAAATTAATAATGTTTATTTTAAATTATTTTAAAAAAATATTTACTTTTAAAAAATAATTT      |        |        |        |        |        |               |
| SARS-CoV-2 Reference Genome NC_045512.2              | (11438)  |              | AATGCTTTAGATCAAGCCATTTCCTA-TGTGGGCTCTTATATATCTCTG-----TTACTTCTAACTACTCAGGT       |        |        |        |        |        |               |
|                                                      |          | Section 1923 |                                                                                  |        |        |        |        |        |               |
|                                                      |          | (147995)     | 147995                                                                           | 148005 | 148016 | 148027 | 148038 | 148049 | 148060 148071 |
| Candidatus Carsonella ruddii strain BT chromosome... | (147777) |              | TACAATTAAAAAATGGAAATTTTTAAAAAATAAATTTTTTTTTGAAAAATTATATAAATTTATTTAATGTTTTTAAAT   |        |        |        |        |        |               |
| Candidatus Carsonella 135557 - 167442nt              | (12221)  |              | TACAATTAAAAAATGGAAATTTTTAAAAAATAAATTTTTTTTTGAAAAATTATATAAATTTATTTAATGTTTTTAAAT   |        |        |        |        |        |               |
| SARS-CoV-2 Reference Genome NC_045512.2              | (11504)  |              | GT-AGTTACAACTGTCATGTTTTTGGCCAGAGGTATTGTTTTT-----ATGTGTGTTGAGTATTGCCCTAT          |        |        |        |        |        |               |
|                                                      |          | Section 1924 |                                                                                  |        |        |        |        |        |               |
|                                                      |          | (148072)     | 148072                                                                           | 148082 | 148093 | 148104 | 148115 | 148126 | 148137 148148 |
| Candidatus Carsonella ruddii strain BT chromosome... | (147854) |              | TAAATTTTAAAAAATAATAATAATTTCTCCTTATATAATTTTAGATTTAATAATTAATTTTATTTAAAAAA          |        |        |        |        |        |               |
| Candidatus Carsonella 135557 - 167442nt              | (12298)  |              | TAAATTTTAAAAAATAATAATAATTTCTCCTTATATAATTTTAGATTTAATAATTAATTTTATTTAAAAAA          |        |        |        |        |        |               |
| SARS-CoV-2 Reference Genome NC_045512.2              | (11569)  |              | TTTCCTTCAATAAC-----TGGTAATACACT-TCAGTGTATAATGCTAG-TTTATTGTTTCTTAGGCTTATTTTGTGAC  |        |        |        |        |        |               |
|                                                      |          | Section 1925 |                                                                                  |        |        |        |        |        |               |
|                                                      |          | (148149)     | 148149                                                                           | 148159 | 148170 | 148181 | 148192 | 148203 | 148214 148225 |
| Candidatus Carsonella ruddii strain BT chromosome... | (147931) |              | TTAAAAATACATACATATATATATATATGTAAACATATAAATCAGATAAATTTATATATACAAAATAGTTCGTTTATTTT |        |        |        |        |        |               |
| Candidatus Carsonella 135557 - 167442nt              | (12375)  |              | TTAAAAATACATACATATATATATATATGTAAACATATAAATCAGATAAATTTATATATACAAAATAGTTCGTTTATTTT |        |        |        |        |        |               |
| SARS-CoV-2 Reference Genome NC_045512.2              | (11638)  |              | TTGTTACTTTGGCTCT-TTGTGTTTACTCAACCGCTACTTTAGACTGACTCTTGGTGTGTTATGATTAC--TTAGTTT   |        |        |        |        |        |               |
|                                                      |          | Section 1926 |                                                                                  |        |        |        |        |        |               |
|                                                      |          | (148226)     | 148226                                                                           | 148236 | 148247 | 148258 | 148269 | 148280 | 148291 148302 |
| Candidatus Carsonella ruddii strain BT chromosome... | (148008) |              | TTTAAAAATTTTGAATAAATATAAATAAATAATTTATTTTAAAAAAGGTTTTCATAGAAAAATTTATATTA          |        |        |        |        |        |               |
| Candidatus Carsonella 135557 - 167442nt              | (12452)  |              | TTTAAAAATTTTGAATAAATATAAATAAATAATTTATTTTAAAAAAGGTTTTCATAGAAAAATTTATATTA          |        |        |        |        |        |               |
| SARS-CoV-2 Reference Genome NC_045512.2              | (11712)  |              | CTACACAGGAGTTTAGATATATGAATTCAACAGGGACTACTCCCACCCAAGAAATA--GCATAGATGCCCTTCAAACTC  |        |        |        |        |        |               |

## SARS-CoV-2 &amp; Bakterien.apr

|                                                      |          |        |         |         |            |           |               |                 |                |              |               |                |        |         |       |        |       |    |      |      |     |       |     |     |   |       |    |    |   |
|------------------------------------------------------|----------|--------|---------|---------|------------|-----------|---------------|-----------------|----------------|--------------|---------------|----------------|--------|---------|-------|--------|-------|----|------|------|-----|-------|-----|-----|---|-------|----|----|---|
|                                                      |          |        |         |         |            |           |               |                 |                |              |               | Section 1927   |        |         |       |        |       |    |      |      |     |       |     |     |   |       |    |    |   |
|                                                      | (148303) | 148303 | 148313  | 148324  | 148335     | 148346    | 148357        | 148368          | 148379         |              |               |                |        |         |       |        |       |    |      |      |     |       |     |     |   |       |    |    |   |
| Candidatus Carsonella ruddii strain BT chromosome... | (148085) | TAGAT  | -AATTTT | TTTTTT  | TTAGGATCAA | AATAATTTT | TGACAATAGATCT | TATTTATATTAATAA | AGAATGTTT      | GTTTTG       |               |                |        |         |       |        |       |    |      |      |     |       |     |     |   |       |    |    |   |
| Candidatus Carsonella 135557 - 167442nt              | (12529)  | TAGAT  | -AATTTT | TTTTTT  | TTAGGATCAA | AATAATTTT | TGACAATAGATCT | TATTTATATTAATAA | AGAATGTTT      | GTTTTG       |               |                |        |         |       |        |       |    |      |      |     |       |     |     |   |       |    |    |   |
| SARS-CoV-2 Reference Genome NC_045512.2              | (11786)  | AACAT  | TAAATT  | GTTGGGT | GTTGGTGGC  | AAACC     | TTGTATCAA     | AGTAGCC         | ACTG-TAC-AGTCT | AAAATGTCAGAT | GTA           |                |        |         |       |        |       |    |      |      |     |       |     |     |   |       |    |    |   |
|                                                      |          |        |         |         |            |           |               |                 |                |              |               | Section 1928   |        |         |       |        |       |    |      |      |     |       |     |     |   |       |    |    |   |
|                                                      | (148380) | 148380 | 148390  | 148401  | 148412     | 148423    | 148434        | 148445          | 148456         |              |               |                |        |         |       |        |       |    |      |      |     |       |     |     |   |       |    |    |   |
| Candidatus Carsonella ruddii strain BT chromosome... | (148161) | CTTT   | TTTGATA | AAAAA   | -TATTA     | AAAAAA    | CTTTT         | TTTAAAAAA       | ATTAAAA        | TTTATATTTT   | TACATTAA      | TACAAAAA       |        |         |       |        |       |    |      |      |     |       |     |     |   |       |    |    |   |
| Candidatus Carsonella 135557 - 167442nt              | (12605)  | CTTT   | TTTGATA | AAAAA   | -TATTA     | AAAAAA    | CTTTT         | TTTAAAAAA       | ATTAAAA        | TTTATATTTT   | TACATTAA      | TACAAAAA       |        |         |       |        |       |    |      |      |     |       |     |     |   |       |    |    |   |
| SARS-CoV-2 Reference Genome NC_045512.2              | (11861)  | AAGT   | GCACAT  | CAGTAG  | TCTTA      | CTCTC     | AGTTTT        | GCAACA          | CTCAGAG        | TAGAA        | TATCATCT      | TAAATTGTGGGCTC | AAATG  |         |       |        |       |    |      |      |     |       |     |     |   |       |    |    |   |
|                                                      |          |        |         |         |            |           |               |                 |                |              |               | Section 1929   |        |         |       |        |       |    |      |      |     |       |     |     |   |       |    |    |   |
|                                                      | (148457) | 148457 | 148467  | 148478  | 148489     | 148500    | 148511        | 148522          | 148533         |              |               |                |        |         |       |        |       |    |      |      |     |       |     |     |   |       |    |    |   |
| Candidatus Carsonella ruddii strain BT chromosome... | (148237) | AAA    | --ATTT  | TTTTT   | TATAAA     | ATTTATTT  | TATATA        | TAATTT          | CAATGAA        | ATTTATTA     | ACAAAAC       |                |        |         |       |        |       |    |      |      |     |       |     |     |   |       |    |    |   |
| Candidatus Carsonella 135557 - 167442nt              | (12681)  | AAA    | --ATTT  | TTTTT   | TATAAA     | ATTTATTT  | TATATA        | TAATTT          | CAATGAA        | ATTTATTA     | ACAAAAC       |                |        |         |       |        |       |    |      |      |     |       |     |     |   |       |    |    |   |
| SARS-CoV-2 Reference Genome NC_045512.2              | (11938)  | TGTCC  | AGTT    | ACACA   | ATGAC      | ATTCTCTTA | GC            | TAAAGAT         | ACTACTGAA      | GCCTTTGAAAA  | AATGGTTTCACTA | CTTTCTG        |        |         |       |        |       |    |      |      |     |       |     |     |   |       |    |    |   |
|                                                      |          |        |         |         |            |           |               |                 |                |              |               | Section 1930   |        |         |       |        |       |    |      |      |     |       |     |     |   |       |    |    |   |
|                                                      | (148534) | 148534 | 148544  | 148555  | 148566     | 148577    | 148588        | 148599          | 148610         |              |               |                |        |         |       |        |       |    |      |      |     |       |     |     |   |       |    |    |   |
| Candidatus Carsonella ruddii strain BT chromosome... | (148312) | ATTT   | TTTTT   | TATTT   | TTTTAGTG   | TTATTA    | AAAAA         | ATAAA           | AAATAGG        | AAAAA        | ATTTATTT      | TAAATTTG       | TATTAT | TAAA    |       |        |       |    |      |      |     |       |     |     |   |       |    |    |   |
| Candidatus Carsonella 135557 - 167442nt              | (12756)  | ATTT   | TTTTT   | TATTT   | TTTTAGTG   | TTATTA    | AAAAA         | ATAAA           | AAATAGG        | AAAAA        | ATTTATTT      | TAAATTTG       | TATTAT | TAAA    |       |        |       |    |      |      |     |       |     |     |   |       |    |    |   |
| SARS-CoV-2 Reference Genome NC_045512.2              | (12015)  | TTTT   | GC      | TTT     | CCA        | TGC       | AGG           | GTG             | C              | TGT--A       | GACATAAA      | C              | AA     | G-----C | TTTG  | TGA    | GA    | AA | TG   | CTGG | AC  | AA    | C   |     |   |       |    |    |   |
|                                                      |          |        |         |         |            |           |               |                 |                |              |               | Section 1931   |        |         |       |        |       |    |      |      |     |       |     |     |   |       |    |    |   |
|                                                      | (148611) | 148611 | 148621  | 148632  | 148643     | 148654    | 148665        | 148676          | 148687         |              |               |                |        |         |       |        |       |    |      |      |     |       |     |     |   |       |    |    |   |
| Candidatus Carsonella ruddii strain BT chromosome... | (148389) | AAAA   | AAAAA   | TTAA    | TTTTATA    | ATAAA     | AAATTTTA      | TTTAA           | AAAAATAAA      | CCATC        | TTAATAG       | GCTATTT        | TATTT  | TTTTAA  |       |        |       |    |      |      |     |       |     |     |   |       |    |    |   |
| Candidatus Carsonella 135557 - 167442nt              | (12833)  | AAAA   | AAAAA   | TTAA    | TTTTATA    | ATAAA     | AAATTTTA      | TTTAA           | AAAAATAAA      | CCATC        | TTAATAG       | GCTATTT        | TATTT  | TTTTAA  |       |        |       |    |      |      |     |       |     |     |   |       |    |    |   |
| SARS-CoV-2 Reference Genome NC_045512.2              | (12077)  | AGGGC  | AA      | CC      | TTA        | CA        | AGC           | TATA            | GCCTC          | AG           | AGTTTA        | GTT            | CCCTT  | -----   | CCATC | A      | TATGC | AG | CTTT | GCT  | TAC | TGC   | TCA |     |   |       |    |    |   |
|                                                      |          |        |         |         |            |           |               |                 |                |              |               | Section 1932   |        |         |       |        |       |    |      |      |     |       |     |     |   |       |    |    |   |
|                                                      | (148688) | 148688 | 148698  | 148709  | 148720     | 148731    | 148742        | 148753          | 148764         |              |               |                |        |         |       |        |       |    |      |      |     |       |     |     |   |       |    |    |   |
| Candidatus Carsonella ruddii strain BT chromosome... | (148466) | AAAT   | GAAAC   | CAAT    | TTTTATT    | TATAT     | TCGAA         | ATTT            | TGTTATT        | TATAAA       | ATTAAT        | TAAGTT         | TAAAA  | AT      | TATTT | TATATA |       |    |      |      |     |       |     |     |   |       |    |    |   |
| Candidatus Carsonella 135557 - 167442nt              | (12910)  | AAAT   | GAAAC   | CAAT    | TTTTATT    | TATAT     | TCGAA         | ATTT            | TGTTATT        | TATAAA       | ATTAAT        | TAAGTT         | TAAAA  | AT      | TATTT | TATATA |       |    |      |      |     |       |     |     |   |       |    |    |   |
| SARS-CoV-2 Reference Genome NC_045512.2              | (12148)  | A      | --      | GAA     | G          | CTT       | AT            | GAG             | CAGG           | CTG          | TT            | GCT            | AAT    | GT      | GATT  | CT     | GAA   | GT | GTTC | TTAA | A   | AAGTT | GAA | GAA | G | TCTTT | GA | AT | G |

## SARS-CoV-2 &amp; Bakterien.apr

|                                                      |          |                                                                                  |        |        |        |        |        |        |        |        |  |
|------------------------------------------------------|----------|----------------------------------------------------------------------------------|--------|--------|--------|--------|--------|--------|--------|--------|--|
|                                                      |          | Section 1933                                                                     |        |        |        |        |        |        |        |        |  |
|                                                      |          | (148765)                                                                         | 148765 | 148775 | 148786 | 148797 | 148808 | 148819 | 148830 | 148841 |  |
| Candidatus Carsonella ruddii strain BT chromosome... | (148543) | AAAAATAAATCAAATATTTTATATTTTATAAAAAATTTTTTTTTCATTAAATTTTGTGA--AATGGATGTTCCAA      |        |        |        |        |        |        |        |        |  |
| Candidatus Carsonella 135557 - 167442nt              | (12987)  | AAAAATAAATCAAATATTTTATATTTTATAAAAAATTTTTTTTTCATTAAATTTTGTGA--AATGGATGTTCCAA      |        |        |        |        |        |        |        |        |  |
| SARS-CoV-2 Reference Genome NC_045512.2              | (12222)  | TGGCTAAATCTGATTTGACCGTGAATGCAAGCCATGCAACGTAAAGTTGGAAAAAGATGGCTGATCAAGCTATGACCCAA |        |        |        |        |        |        |        |        |  |
|                                                      |          | Section 1934                                                                     |        |        |        |        |        |        |        |        |  |
|                                                      |          | (148842)                                                                         | 148842 | 148852 | 148863 | 148874 | 148885 | 148896 | 148907 | 148918 |  |
| Candidatus Carsonella ruddii strain BT chromosome... | (148618) | CTATAGTAAATTATTCTAAATCTGTTCAAAACAATTTTTAATTATTAATAAAAAAATGAATTTTCT               |        |        |        |        |        |        |        |        |  |
| Candidatus Carsonella 135557 - 167442nt              | (13062)  | CTATAGTAAATTATTCTAAATCTGTTCAAAACAATTTTTAATTATTAATAAAAAAATGAATTTTCT               |        |        |        |        |        |        |        |        |  |
| SARS-CoV-2 Reference Genome NC_045512.2              | (12299)  | ATGTA-TAAAC-AGGCTAGATCTGAGGACAAAGAGGGCAAAAGTTACTAGTGTCTATGCAGACAA-TGCTTTTCTAT    |        |        |        |        |        |        |        |        |  |
|                                                      |          | Section 1935                                                                     |        |        |        |        |        |        |        |        |  |
|                                                      |          | (148919)                                                                         | 148919 | 148929 | 148940 | 148951 | 148962 | 148973 | 148984 | 148995 |  |
| Candidatus Carsonella ruddii strain BT chromosome... | (148695) | CTTTCACAATCTCCACAATGTATTAAACAATATTATATGTTTAAATAACGTTAAAAAATATTTTAAATAAATTAAATTG  |        |        |        |        |        |        |        |        |  |
| Candidatus Carsonella 135557 - 167442nt              | (13139)  | CTTTCACAATCTCCACAATGTATTAAACAATATTATATGTTTAAATAACGTTAAAAAATATTTTAAATAAATTAAATTG  |        |        |        |        |        |        |        |        |  |
| SARS-CoV-2 Reference Genome NC_045512.2              | (12373)  | GCTTAGAAGGTGGATTAATGATGCACTCAACA--ACATTAATCAACAAATGC-AGAGATGGTTGTGTTCCCTTGAACA   |        |        |        |        |        |        |        |        |  |
|                                                      |          | Section 1936                                                                     |        |        |        |        |        |        |        |        |  |
|                                                      |          | (148996)                                                                         | 148996 | 149006 | 149017 | 149028 | 149039 | 149050 | 149061 | 149072 |  |
| Candidatus Carsonella ruddii strain BT chromosome... | (148772) | TTTTAGAGATGAAGATGAAAG---ATCTAACAGATTAAAGGAATTTACTCAATTAGATATAGAAATGTGTTTGTGTTG   |        |        |        |        |        |        |        |        |  |
| Candidatus Carsonella 135557 - 167442nt              | (13216)  | TTTTAGAGATGAAGATGAAAG---ATCTAACAGATTAAAGGAATTTACTCAATTAGATATAGAAATGTGTTTGTGTTG   |        |        |        |        |        |        |        |        |  |
| SARS-CoV-2 Reference Genome NC_045512.2              | (12447)  | TAATACTCTTACAACAGCAGCCAACCTAAATGG-TTGTCTATACAGACTATAACACATATAAAAATACGTGTGATGG    |        |        |        |        |        |        |        |        |  |
|                                                      |          | Section 1937                                                                     |        |        |        |        |        |        |        |        |  |
|                                                      |          | (149073)                                                                         | 149073 | 149083 | 149094 | 149105 | 149116 | 149127 | 149138 | 149149 |  |
| Candidatus Carsonella ruddii strain BT chromosome... | (148846) | AATTTTTAAATTAATAAAAAATTAATTAACTATTTATTAAAAATCTATATTTTATTAATTTTAAATAAAAAAATTTT    |        |        |        |        |        |        |        |        |  |
| Candidatus Carsonella 135557 - 167442nt              | (13290)  | AATTTTTAAATTAATAAAAAATTAATTAACTATTTATTAAAAATCTATATTTTATTAATTTTAAATAAAAAAATTTT    |        |        |        |        |        |        |        |        |  |
| SARS-CoV-2 Reference Genome NC_045512.2              | (12523)  | TAC----AACATTTACTTA-TGCATCAGCATGTGGGAAATCCAAACAGGTTGTAGATGCAG--ATAGTAAAATTGTT    |        |        |        |        |        |        |        |        |  |
|                                                      |          | Section 1938                                                                     |        |        |        |        |        |        |        |        |  |
|                                                      |          | (149150)                                                                         | 149150 | 149160 | 149171 | 149182 | 149193 | 149204 | 149215 | 149226 |  |
| Candidatus Carsonella ruddii strain BT chromosome... | (148923) | TTTTTAACCTTTAAATATATAATATATAAAAAATTTTTTTTGTGAAAAAATTTTAAATAAACCATATATTTATAA      |        |        |        |        |        |        |        |        |  |
| Candidatus Carsonella 135557 - 167442nt              | (13367)  | TTTTTAACCTTTAAATATATAATATATAAAAAATTTTTTTTGTGAAAAAATTTTAAATAAACCATATATTTATAA      |        |        |        |        |        |        |        |        |  |
| SARS-CoV-2 Reference Genome NC_045512.2              | (12593)  | ----CAACTTAGTGAATTAGTATGGACAA-----TT---CACTAA----T-TTAGCATGGCTCTTATTGTAA         |        |        |        |        |        |        |        |        |  |

## SARS-CoV-2 &amp; Bakterien.apr

|                                                      |          |                                                                                     |        |        |        |        |        |        |        |
|------------------------------------------------------|----------|-------------------------------------------------------------------------------------|--------|--------|--------|--------|--------|--------|--------|
| Section 1939                                         |          |                                                                                     |        |        |        |        |        |        |        |
|                                                      | (149227) | 149227                                                                              | 149237 | 149248 | 149259 | 149270 | 149281 | 149292 | 149303 |
| Candidatus Carsonella ruddii strain BT chromosome... | (149000) | AAAAATTAATATAAAATTTTATAATTTATTTGTTTAAATATAAATTATTATAAATTTTTTAAAGAAAAAAATTTT         |        |        |        |        |        |        |        |
| Candidatus Carsonella 135557 - 167442nt              | (13444)  | AAAAATTAATATAAAATTTTATAATTTATTTGTTTAAATATAAATTATTATAAATTTTTTAAAGAAAAAAATTTT         |        |        |        |        |        |        |        |
| SARS-CoV-2 Reference Genome NC_045512.2              | (12651)  | CAGCTTTAAAGGGCCA--ATTCTGCTGTCAAAATTACAGAAATAATGAGCTTAGTCCGTGTTGCACACTACGACAGATGTCTT |        |        |        |        |        |        |        |
| Section 1940                                         |          |                                                                                     |        |        |        |        |        |        |        |
|                                                      | (149304) | 149304                                                                              | 149314 | 149325 | 149336 | 149347 | 149358 | 149369 | 149380 |
| Candidatus Carsonella ruddii strain BT chromosome... | (149077) | TTTTTTATAAATTAAAAAATATATTTTAA--TAATATCAAAAAAAAAAATTGATTTTAAATTTATGTTATTATTTTGA      |        |        |        |        |        |        |        |
| Candidatus Carsonella 135557 - 167442nt              | (13521)  | TTTTTTATAAATTAAAAAATATATTTTAA--TAATATCAAAAAAAAAAATTGATTTTAAATTTATGTTATTATTTTGA      |        |        |        |        |        |        |        |
| SARS-CoV-2 Reference Genome NC_045512.2              | (12726)  | GTGCTGCCGGTACTACACAAACATGCTTGCACATGATGACAAATGCGTTAGCTTACTACAAACACACAACAAAGGGAGGTAGG |        |        |        |        |        |        |        |
| Section 1941                                         |          |                                                                                     |        |        |        |        |        |        |        |
|                                                      | (149381) | 149381                                                                              | 149391 | 149402 | 149413 | 149424 | 149435 | 149446 | 149457 |
| Candidatus Carsonella ruddii strain BT chromosome... | (149153) | TTTTTGTTTAAAAATATTTAAATATTATTAATAATA--AAATAAATTTTTTTTGGTACGT--TAATTTTTTTTATTTTAA    |        |        |        |        |        |        |        |
| Candidatus Carsonella 135557 - 167442nt              | (13597)  | TTTTTGTTTAAAAATATTTAAATATTATTAATAATA--AAATAAATTTTTTTTGGTACGT--TAATTTTTTTTATTTTAA    |        |        |        |        |        |        |        |
| SARS-CoV-2 Reference Genome NC_045512.2              | (12803)  | TTTTGTACTTGCACTGTTATCCGATTTACAGGATTTTGAAATGGGCAGATTCCCTAAGAGTGATGGAACTGGTACTAT      |        |        |        |        |        |        |        |
| Section 1942                                         |          |                                                                                     |        |        |        |        |        |        |        |
|                                                      | (149458) | 149458                                                                              | 149468 | 149479 | 149490 | 149501 | 149512 | 149523 | 149534 |
| Candidatus Carsonella ruddii strain BT chromosome... | (149228) | AAAAAAAAAAATA--AATCATCATCAATTTTCATCATATAAAAAAATATTTTACTTCAATTTATAAATCTAAATCTTTA     |        |        |        |        |        |        |        |
| Candidatus Carsonella 135557 - 167442nt              | (13672)  | AAAAAAAAAAATA--AATCATCATCAATTTTCATCATATAAAAAAATATTTTACTTCAATTTATAAATCTAAATCTTTA     |        |        |        |        |        |        |        |
| SARS-CoV-2 Reference Genome NC_045512.2              | (12880)  | CTATACAGAACTGGAAACCACTTGTAGGTTTGTACAGACACAC-----CTAAAGGTCCCTAAAGTGAAGTATTTA         |        |        |        |        |        |        |        |
| Section 1943                                         |          |                                                                                     |        |        |        |        |        |        |        |
|                                                      | (149535) | 149535                                                                              | 149545 | 149556 | 149567 | 149578 | 149589 | 149600 | 149611 |
| Candidatus Carsonella ruddii strain BT chromosome... | (149304) | TCATATGATATAAATTATAAATGGAAATGGAATAGGAGGAGGATCTATTAGAAATTTAAATTTTAAATTACAAAAAA       |        |        |        |        |        |        |        |
| Candidatus Carsonella 135557 - 167442nt              | (13748)  | TCATATGATATAAATTATAAATGGAAATGGAATAGGAGGAGGATCTATTAGAAATTTAAATTTTAAATTACAAAAAA       |        |        |        |        |        |        |        |
| SARS-CoV-2 Reference Genome NC_045512.2              | (12950)  | TACTTTATTAAGGATTAAAC--AACTTAAATAGAGGTATGTTAC--TTGGTAGTTTAGCTGCCACAGTACGTCTACA       |        |        |        |        |        |        |        |
| Section 1944                                         |          |                                                                                     |        |        |        |        |        |        |        |
|                                                      | (149612) | 149612                                                                              | 149622 | 149633 | 149644 | 149655 | 149666 | 149677 | 149688 |
| Candidatus Carsonella ruddii strain BT chromosome... | (149381) | AAATTTTTTTTATCAAAAGAAAATAAATCTAATTTTTTAAATTTTTTTAAAAAAGTATTCCACAACATTGTGGTA         |        |        |        |        |        |        |        |
| Candidatus Carsonella 135557 - 167442nt              | (13825)  | AAATTTTTTTTATCAAAAGAAAATAAATCTAATTTTTTAAATTTTTTTAAAAAAGTATTCCACAACATTGTGGTA         |        |        |        |        |        |        |        |
| SARS-CoV-2 Reference Genome NC_045512.2              | (13024)  | AGCTGGTAAAT---GCAACAGAAATGCGCTGCAATT---CAACTGTATTA-----TCTTTC-----TGTGCTT           |        |        |        |        |        |        |        |

## SARS-CoV-2 &amp; Bakterien.apr

|                                                      |          |                     |                     |                          |                                  |                  |        |                      |                  |        |          |          |          |       |       |     |     |    |      |     |     |        |     |     |     |     |     |      |    |    |     |    |
|------------------------------------------------------|----------|---------------------|---------------------|--------------------------|----------------------------------|------------------|--------|----------------------|------------------|--------|----------|----------|----------|-------|-------|-----|-----|----|------|-----|-----|--------|-----|-----|-----|-----|-----|------|----|----|-----|----|
|                                                      |          |                     | Section 1945        |                          |                                  |                  |        |                      |                  |        |          |          |          |       |       |     |     |    |      |     |     |        |     |     |     |     |     |      |    |    |     |    |
|                                                      | (149689) | 149689              | 149699              | 149710                   | 149721                           | 149732           | 149743 | 149754               | 149765           |        |          |          |          |       |       |     |     |    |      |     |     |        |     |     |     |     |     |      |    |    |     |    |
| Candidatus Carsonella ruddii strain BT chromosome... | (149458) | TTGCAATAGGTTT       | TAGATAGATTATTTT     | TATTAATATTTTAAACAAATATTA | AAAAATATAATTACATATCAAAAATAT      |                  |        |                      |                  |        |          |          |          |       |       |     |     |    |      |     |     |        |     |     |     |     |     |      |    |    |     |    |
| Candidatus Carsonella 135557 - 167442nt              | (13902)  | TTGCAATAGGTTT       | TAGATAGATTATTTT     | TATTAATATTTTAAACAAATATTA | AAAAATATAATTACATATCAAAAATAT      |                  |        |                      |                  |        |          |          |          |       |       |     |     |    |      |     |     |        |     |     |     |     |     |      |    |    |     |    |
| SARS-CoV-2 Reference Genome NC_045512.2              | (13080)  | TTGCTGTAGATGCTGCTA  | -----               | AA                       | GCTT                             | ---A             | CAAA   | GATTATCTAGCTAGTGGGGG | ACAA             | CC     | AATCA    |          |          |       |       |     |     |    |      |     |     |        |     |     |     |     |     |      |    |    |     |    |
|                                                      |          |                     | Section 1946        |                          |                                  |                  |        |                      |                  |        |          |          |          |       |       |     |     |    |      |     |     |        |     |     |     |     |     |      |    |    |     |    |
|                                                      | (149766) | 149766              | 149776              | 149787                   | 149798                           | 149809           | 149820 | 149831               | 149842           |        |          |          |          |       |       |     |     |    |      |     |     |        |     |     |     |     |     |      |    |    |     |    |
| Candidatus Carsonella ruddii strain BT chromosome... | (149535) | AAAAAATTAATAAAATCAA | ---                 | TAAACATTATGATATTAAT      | TGAAAAAATATCAACAATAAATTTAATTTTAA |                  |        |                      |                  |        |          |          |          |       |       |     |     |    |      |     |     |        |     |     |     |     |     |      |    |    |     |    |
| Candidatus Carsonella 135557 - 167442nt              | (13979)  | AAAAAATTAATAAAATCAA | ---                 | TAAACATTATGATATTAAT      | TGAAAAAATATCAACAATAAATTTAATTTTAA |                  |        |                      |                  |        |          |          |          |       |       |     |     |    |      |     |     |        |     |     |     |     |     |      |    |    |     |    |
| SARS-CoV-2 Reference Genome NC_045512.2              | (13140)  | CTAATTGTGT          | TAAAGATGTTGTG       | TACACAC                  | ACTG                             | GTA              | CTGGT  | CAGGC                | AA               | TAA    | CAGTTACA | CCGGAA   | GCC      | AATAT | TGGA  |     |     |    |      |     |     |        |     |     |     |     |     |      |    |    |     |    |
|                                                      |          |                     | Section 1947        |                          |                                  |                  |        |                      |                  |        |          |          |          |       |       |     |     |    |      |     |     |        |     |     |     |     |     |      |    |    |     |    |
|                                                      | (149843) | 149843              | 149853              | 149864                   | 149875                           | 149886           | 149897 | 149908               | 149919           |        |          |          |          |       |       |     |     |    |      |     |     |        |     |     |     |     |     |      |    |    |     |    |
| Candidatus Carsonella ruddii strain BT chromosome... | (149609) | AAAAAATTAATAAGT     | TAAATTAATAAATAATTTT | TATCTTTTTT               | TTTAAATATTAATAAATAAATA           |                  |        |                      |                  |        |          |          |          |       |       |     |     |    |      |     |     |        |     |     |     |     |     |      |    |    |     |    |
| Candidatus Carsonella 135557 - 167442nt              | (14053)  | AAAAAATTAATAAGT     | TAAATTAATAAATAATTTT | TATCTTTTTT               | TTTAAATATTAATAAATAAATA           |                  |        |                      |                  |        |          |          |          |       |       |     |     |    |      |     |     |        |     |     |     |     |     |      |    |    |     |    |
| SARS-CoV-2 Reference Genome NC_045512.2              | (13216)  | TC                  | AA                  | GAATCCT                  | TTGGTGGT                         | -----            | GC     | AT                   | CGTGTGTCTGTAC    | TGCCG  | TTGCC    | ACATAGAT | CA       | TCC   | AAATC |     |     |    |      |     |     |        |     |     |     |     |     |      |    |    |     |    |
|                                                      |          |                     | Section 1948        |                          |                                  |                  |        |                      |                  |        |          |          |          |       |       |     |     |    |      |     |     |        |     |     |     |     |     |      |    |    |     |    |
|                                                      | (149920) | 149920              | 149930              | 149941                   | 149952                           | 149963           | 149974 | 149985               | 149996           |        |          |          |          |       |       |     |     |    |      |     |     |        |     |     |     |     |     |      |    |    |     |    |
| Candidatus Carsonella ruddii strain BT chromosome... | (149686) | ATAAAAATCAAAAATTTT  | TATACAAATAAATTT     | ---                      | TAAAAACAAAA                      | AAAAAAAAAATTTTTT | TTTTC  | ACTTT                | TTTTTT           |        |          |          |          |       |       |     |     |    |      |     |     |        |     |     |     |     |     |      |    |    |     |    |
| Candidatus Carsonella 135557 - 167442nt              | (14130)  | ATAAAAATCAAAAATTTT  | TATACAAATAAATTT     | ---                      | TAAAAACAAAA                      | AAAAAAAAAATTTTTT | TTTTC  | ACTTT                | TTTTTT           |        |          |          |          |       |       |     |     |    |      |     |     |        |     |     |     |     |     |      |    |    |     |    |
| SARS-CoV-2 Reference Genome NC_045512.2              | (13281)  | C                   | TAA                 | AGG                      | -----                            | A                | TTTT   | GT                   | GC               | AC     | TT       | AAA      | GGT      | AAG   | TATGT | AC  | AAA | T  | ACCT | ACA | ACT | TT     | GT  | GC  | TAA | T   | GA  | CC   | CT | GT | GGG | TT |
|                                                      |          |                     | Section 1949        |                          |                                  |                  |        |                      |                  |        |          |          |          |       |       |     |     |    |      |     |     |        |     |     |     |     |     |      |    |    |     |    |
|                                                      | (149997) | 149997              | 150007              | 150018                   | 150029                           | 150040           | 150051 | 150062               | 150073           |        |          |          |          |       |       |     |     |    |      |     |     |        |     |     |     |     |     |      |    |    |     |    |
| Candidatus Carsonella ruddii strain BT chromosome... | (149761) | ATTTTAAATAACATAAAAA | TAAAAA              | AAATTTTTT                | TATTTTATTTTATTTTCAAA             | TAT              | TATATT | TATTAGGAAAGATGGTA    |                  |        |          |          |          |       |       |     |     |    |      |     |     |        |     |     |     |     |     |      |    |    |     |    |
| Candidatus Carsonella 135557 - 167442nt              | (14205)  | ATTTTAAATAACATAAAAA | TAAAAA              | AAATTTTTT                | TATTTTATTTTATTTTCAAA             | TAT              | TATATT | TATTAGGAAAGATGGTA    |                  |        |          |          |          |       |       |     |     |    |      |     |     |        |     |     |     |     |     |      |    |    |     |    |
| SARS-CoV-2 Reference Genome NC_045512.2              | (13353)  | ---                 | TT                  | ---                      | ACA                              | -----            | CT     | TAAAAA               | CA               | AG     | T        | CT       | GT       | ----- | ACCG  | T   | CT  | GC | GG   | TAT | GT  | GGAAAG | G   | TAT | G   |     |     |      |    |    |     |    |
|                                                      |          |                     | Section 1950        |                          |                                  |                  |        |                      |                  |        |          |          |          |       |       |     |     |    |      |     |     |        |     |     |     |     |     |      |    |    |     |    |
|                                                      | (150074) | 150074              | 150084              | 150095                   | 150106                           | 150117           | 150128 | 150139               | 150150           |        |          |          |          |       |       |     |     |    |      |     |     |        |     |     |     |     |     |      |    |    |     |    |
| Candidatus Carsonella ruddii strain BT chromosome... | (149838) | GA                  | GT                  | GGTT                     | TAATACATCGGT                     | CTT              | TGAAAA | CCG                  | AAAAAGTTAATTCTTT | CCAGGG | TTC      | GAATCC   | CTGTCTTT | TCC   | CAAAA |     |     |    |      |     |     |        |     |     |     |     |     |      |    |    |     |    |
| Candidatus Carsonella 135557 - 167442nt              | (14282)  | GA                  | GT                  | GGTT                     | TAATACATCGGT                     | CTT              | TGAAAA | CCG                  | AAAAAGTTAATTCTTT | CCAGGG | TTC      | GAATCC   | CTGTCTTT | TCC   | CAAAA |     |     |    |      |     |     |        |     |     |     |     |     |      |    |    |     |    |
| SARS-CoV-2 Reference Genome NC_045512.2              | (13404)  | G                   | CT                  | GT                       | AGTT                             | -----            | GT     | GAT                  | CAA              | CT     | CCG      | CG       | AA       | C     | ----- | CCA | T   | G  | CTT  | C   | AGT | CAG    | CTG | A   | --- | TGC | --- | ACAA |    |    |     |    |

## SARS-CoV-2 &amp; Bakterien.apr

|                                                      |          |  | Section 1951 |          |           |            |              |          |          |          |              |                                                  |
|------------------------------------------------------|----------|--|--------------|----------|-----------|------------|--------------|----------|----------|----------|--------------|--------------------------------------------------|
|                                                      |          |  | (150151)     | 150151   | 150161    | 150172     | 150183       | 150194   | 150205   | 150216   | 150227       |                                                  |
| Candidatus Carsonella ruddii strain BT chromosome... | (149914) |  | AAA          | TTTTA    | ATTTCTAT  | TTTATCTAT  | TAAAAA       | AGAATTT  | TTTAAAA  | AAAAAT   | TACTAATTAAAA | TAAATTATAAGTAATTTT                               |
| Candidatus Carsonella 135557 - 167442nt              | (14358)  |  | AAA          | TTTTA    | ATTTCTAT  | TTTATCTAT  | TAAAAA       | AGAATTT  | TTTAAAA  | AAAAAT   | TACTAATTAAAA | TAAATTATAAGTAATTTT                               |
| SARS-CoV-2 Reference Genome NC_045512.2              | (13457)  |  | TCG          | TTTTT    | TA        | AACGGG     | TTT          | GCGGT    | GT       | TA       | AGTGC        | AGCCCGTCTTACACCG-TGCGG--CACAAGGCAC               |
|                                                      |          |  |              |          |           |            |              |          |          |          |              |                                                  |
|                                                      |          |  | Section 1952 |          |           |            |              |          |          |          |              |                                                  |
|                                                      |          |  | (150228)     | 150228   | 150238    | 150249     | 150260       | 150271   | 150282   | 150293   | 150304       |                                                  |
| Candidatus Carsonella ruddii strain BT chromosome... | (149991) |  | T            | TATATTAT | CATATAGAT | TTTAATGAAT | TTCAAT       | TATGTTAA | TAA      | TGAT     | TCGTTTTGT    | ---ATTAATGAAATTTTATT                             |
| Candidatus Carsonella 135557 - 167442nt              | (14435)  |  | T            | TATATTAT | CATATAGAT | TTTAATGAAT | TTCAAT       | TATGTTAA | TAA      | TGAT     | TCGTTTTGT    | ---ATTAATGAAATTTTATT                             |
| SARS-CoV-2 Reference Genome NC_045512.2              | (13531)  |  | G            | TAT      | -----     | ACAGGG     | GCTTT        | TGACAT   | CT       | TACAAT   | GAT          | ----AAAGTAGCTGGTTTTGCTAAATTCC                    |
|                                                      |          |  |              |          |           |            |              |          |          |          |              |                                                  |
|                                                      |          |  | Section 1953 |          |           |            |              |          |          |          |              |                                                  |
|                                                      |          |  | (150305)     | 150305   | 150315    | 150326     | 150337       | 150348   | 150359   | 150370   | 150381       |                                                  |
| Candidatus Carsonella ruddii strain BT chromosome... | (150065) |  | T            | TTAATAA  | TTTATGTT  | AAAAAAT    | TTTTTT       | AAATAT   | ATAAAAT  | AGAAT    | TACATTTAAT   | TGAATAAAATATTTAAATATAAAAA                        |
| Candidatus Carsonella 135557 - 167442nt              | (14509)  |  | T            | TTAATAA  | TTTATGTT  | AAAAAAT    | TTTTTT       | AAATAT   | ATAAAAT  | AGAAT    | TACATTTAAT   | TGAATAAAATATTTAAATATAAAAA                        |
| SARS-CoV-2 Reference Genome NC_045512.2              | (13598)  |  | G            | TT       | GTCGC     | TT         | C----        | C        | AA       | GAAA     | AGGACG       | AA                                               |
|                                                      |          |  |              |          |           |            |              |          |          |          |              |                                                  |
|                                                      |          |  | Section 1954 |          |           |            |              |          |          |          |              |                                                  |
|                                                      |          |  | (150382)     | 150382   | 150392    | 150403     | 150414       | 150425   | 150436   | 150447   | 150458       |                                                  |
| Candidatus Carsonella ruddii strain BT chromosome... | (150142) |  | A            | TAAAA    | TAAAAA    | AAATTTT    | TCATTT       | TGAAAA   | TAATTTT  | T        | TAGGAAAA     | AAATTTAACCAATTGGTTATAAATTTTGTGTGG                |
| Candidatus Carsonella 135557 - 167442nt              | (14586)  |  | A            | TAAAA    | TAAAAA    | AAATTTT    | TCATTT       | TGAAAA   | TAATTTT  | T        | TAGGAAAA     | AAATTTAACCAATTGGTTATAAATTTTGTGTGG                |
| SARS-CoV-2 Reference Genome NC_045512.2              | (13662)  |  | A            | CACACT   | TTCTCT    | TA         | ACT          | TACCA    | ACAT     | GAA      | GAAAC        | AATTTATA---ATTTACTTAAAGGATTGTCCAGC----           |
|                                                      |          |  |              |          |           |            |              |          |          |          |              |                                                  |
|                                                      |          |  | Section 1955 |          |           |            |              |          |          |          |              |                                                  |
|                                                      |          |  | (150459)     | 150459   | 150469    | 150480     | 150491       | 150502   | 150513   | 150524   | 150535       |                                                  |
| Candidatus Carsonella ruddii strain BT chromosome... | (150219) |  | T            | ATAAT    | TATATTTT  | TTTTAAAA   | AAAAAATTTATT | AATAAT   | GTCTGTG  | TTACCTGG | ATT          | TGGTAATCAAAAAATTTTAA                             |
| Candidatus Carsonella 135557 - 167442nt              | (14663)  |  | T            | ATAAT    | TATATTTT  | TTTTAAAA   | AAAAAATTTATT | AATAAT   | GTCTGTG  | TTACCTGG | ATT          | TGGTAATCAAAAAATTTTAA                             |
| SARS-CoV-2 Reference Genome NC_045512.2              | (13731)  |  | TA           | -AA      | CAT       | GAC        | TTCTTA       | -----    | AGTT     | TAG      | AAATA--      | GACGGTG--ACATGG--TACCACATATATCACTCAACG           |
|                                                      |          |  |              |          |           |            |              |          |          |          |              |                                                  |
|                                                      |          |  | Section 1956 |          |           |            |              |          |          |          |              |                                                  |
|                                                      |          |  | (150536)     | 150536   | 150546    | 150557     | 150568       | 150579   | 150590   | 150601   | 150612       |                                                  |
| Candidatus Carsonella ruddii strain BT chromosome... | (150296) |  | A            | AAAA     | ACTAAAT   | ACATATAT   | TATTA        | AAAAATCA | AAAAATAT | AGATGGT  | GGCATT       | ---AATAAAATAATTTATAAATTTTAA                      |
| Candidatus Carsonella 135557 - 167442nt              | (14740)  |  | A            | AAAA     | ACTAAAT   | ACATATAT   | TATTA        | AAAAATCA | AAAAATAT | AGATGGT  | GGCATT       | ---AATAAAATAATTTATAAATTTTAA                      |
| SARS-CoV-2 Reference Genome NC_045512.2              | (13794)  |  | T            | CTT      | ACTAAAT   | AC         | A-AT         | GGCA     | GA       | CC       | TC           | GTC-TATGCTTAAAGGCATTTTGATGAAGGTAATTTGTGACACATTAA |

## SARS-CoV-2 &amp; Bakterien.apr

|                                                      |          |                                                                                  |        |        |        |        |        |        |               |
|------------------------------------------------------|----------|----------------------------------------------------------------------------------|--------|--------|--------|--------|--------|--------|---------------|
|                                                      |          | Section 1957                                                                     |        |        |        |        |        |        |               |
|                                                      |          | (150613)                                                                         | 150613 | 150623 | 150634 | 150645 | 150656 | 150667 | 150678 150689 |
| Candidatus Carsonella ruddii strain BT chromosome... | (150370) | AAAAATTATTTTAATAAAATAAATTATAGGGTCTAATATTATAAATTTTAAAAAAATAAATTCGTTTTTTTTATAAAT   |        |        |        |        |        |        |               |
| Candidatus Carsonella 135557 - 167442nt              | (14814)  | AAAAATTATTTTAATAAAATAAATTATAGGGTCTAATATTATAAATTTTAAAAAAATAAATTCGTTTTTTTTATAAAT   |        |        |        |        |        |        |               |
| SARS-CoV-2 Reference Genome NC_045512.2              | (13869)  | AGAAATACTTGTCACATACAAATTGTTGTGATGATGATTAT----TTCAAATAAAAGGACTGGTATGATT-----T     |        |        |        |        |        |        |               |
|                                                      |          | Section 1958                                                                     |        |        |        |        |        |        |               |
|                                                      |          | (150690)                                                                         | 150690 | 150700 | 150711 | 150722 | 150733 | 150744 | 150755 150766 |
| Candidatus Carsonella ruddii strain BT chromosome... | (150447) | TTTATAAAAAATGAATATTTAAATTAAATAAAAAATTTTATTTTAA-GTATTAACTA---TTTAAATAATTCATATTT   |        |        |        |        |        |        |               |
| Candidatus Carsonella 135557 - 167442nt              | (14891)  | TTTATAAAAAATGAATATTTAAATTAAATAAAAAATTTTATTTTAA-GTATTAACTA---TTTAAATAATTCATATTT   |        |        |        |        |        |        |               |
| SARS-CoV-2 Reference Genome NC_045512.2              | (13935)  | TGTAAGAAAACCCAGATATATTACGCGTATACGCCAACCTTAGGTGAACGTGTACGGCAAGC---TTTGTAA--AACAGT |        |        |        |        |        |        |               |
|                                                      |          | Section 1959                                                                     |        |        |        |        |        |        |               |
|                                                      |          | (150767)                                                                         | 150767 | 150777 | 150788 | 150799 | 150810 | 150821 | 150832 150843 |
| Candidatus Carsonella ruddii strain BT chromosome... | (150520) | ACCTCCTTGAGCTGCAATATTTATTGTTACTGTTTTCATTATTAATGAATTAAATATAATTACCACTCTCTGCTT      |        |        |        |        |        |        |               |
| Candidatus Carsonella 135557 - 167442nt              | (14964)  | ACCTCCTTGAGCTGCAATATTTATTGTTACTGTTTTCATTATTAATGAATTAAATATAATTACCACTCTCTGCTT      |        |        |        |        |        |        |               |
| SARS-CoV-2 Reference Genome NC_045512.2              | (14010)  | ACAAATTCGTGATGCCATGCCGAATGCTGGTATTGTTGG---TGTACTGACATAGATAATCAAGATCTCAA--T       |        |        |        |        |        |        |               |
|                                                      |          | Section 1960                                                                     |        |        |        |        |        |        |               |
|                                                      |          | (150844)                                                                         | 150844 | 150854 | 150865 | 150876 | 150887 | 150898 | 150909 150920 |
| Candidatus Carsonella ruddii strain BT chromosome... | (150597) | TTGGTCCAGTACCAGATAAATTACATCCACCAAAAGGTTGCATACCACCAATTGGCTCCTATAGTATTTCTATTTATA   |        |        |        |        |        |        |               |
| Candidatus Carsonella 135557 - 167442nt              | (15041)  | TTGGTCCAGTACCAGATAAATTACATCCACCAAAAGGTTGCATACCACCAATTGGCTCCTATAGTATTTCTATTTATA   |        |        |        |        |        |        |               |
| SARS-CoV-2 Reference Genome NC_045512.2              | (14080)  | G-----GTAACCTGGTA--TGATTTCGGT-----GATTTCATACAAACCAACGCCAGGTAGTGGAGTTCTGTTGTA     |        |        |        |        |        |        |               |
|                                                      |          | Section 1961                                                                     |        |        |        |        |        |        |               |
|                                                      |          | (150921)                                                                         | 150921 | 150931 | 150942 | 150953 | 150964 | 150975 | 150986 150997 |
| Candidatus Carsonella ruddii strain BT chromosome... | (150674) | TAAATATTTCTATATTTAATTTATTAGCTAAATATTTATAAAAAGATTTCATTTCTACTATGAATTCCTAAAGTTA-    |        |        |        |        |        |        |               |
| Candidatus Carsonella 135557 - 167442nt              | (15118)  | TAAATATTTCTATATTTAATTTATTAGCTAAATATTTATAAAAAGATTTCATTTCTACTATGAATTCCTAAAGTTA-    |        |        |        |        |        |        |               |
| SARS-CoV-2 Reference Genome NC_045512.2              | (14143)  | GA-----TTCCTATTATTATT-----GTTAATGCCATATATTAACTTGACCAAGGGCTTTAACTGC--AGAGTCAAC    |        |        |        |        |        |        |               |
|                                                      |          | Section 1962                                                                     |        |        |        |        |        |        |               |
|                                                      |          | (150998)                                                                         | 150998 | 151008 | 151019 | 151030 | 151041 | 151052 | 151063 151074 |
| Candidatus Carsonella ruddii strain BT chromosome... | (150750) | ATCCATATTCTACATTATTAATATCTTTTATTATATCATTTAATTTGTCGTTTTTATAAATTGCTACATGCAATATA    |        |        |        |        |        |        |               |
| Candidatus Carsonella 135557 - 167442nt              | (15194)  | ATCCATATTCTACATTATTAATATCTTTTATTATATCATTTAATTTGTCGTTTTTATAAATTGCTACATGCAATATA    |        |        |        |        |        |        |               |
| SARS-CoV-2 Reference Genome NC_045512.2              | (14207)  | ATGTTGACACTGACTTAACAAAGCCTTA-----CATTAAAGTGGGATTGTTAAATATGACTTCAAGGAAGAGA        |        |        |        |        |        |        |               |

SARS-CoV-2 & Bakterien.apr

|                                                      |          |  | Section 1963 |               |               |             |             |             |                |                 |                    |                     |             |    |
|------------------------------------------------------|----------|--|--------------|---------------|---------------|-------------|-------------|-------------|----------------|-----------------|--------------------|---------------------|-------------|----|
|                                                      |          |  | (151075)     | 151075        | 151085        | 151096      | 151107      | 151118      | 151129         | 151140          | 151151             |                     |             |    |
| Candidatus Carsonella ruddii strain BT chromosome... | (150827) |  |              | GGACCAAACTGTT | CAGATT        | TTAAAT      | CAATTTATT   | CCATT       | TACTCTAATA     | AATGTAGGTTT     | TATAAAATTTCCATT    | TAT                 |             |    |
| Candidatus Carsonella 135557 - 167442nt              | (15271)  |  |              | GGACCAAACTGTT | CAGATT        | TTAAAT      | CAATTTATT   | CCATT       | TACTCTAATA     | AATGTAGGTTT     | TATAAAATTTCCATT    | TAT                 |             |    |
| SARS-CoV-2 Reference Genome NC_045512.2              | (14276)  |  |              | GGTTAAAACTC   | TTTGACCG      | TTA         | TTTAAATATT  | GGGATC      | GAGACAT        | ACCACCCAAAT     | TGTGTAACTG         | TTTGGAATGAC         |             |    |
|                                                      |          |  | Section 1964 |               |               |             |             |             |                |                 |                    |                     |             |    |
|                                                      |          |  | (151152)     | 151152        | 151162        | 151173      | 151184      | 151195      | 151206         | 151217          | 151228             |                     |             |    |
| Candidatus Carsonella ruddii strain BT chromosome... | (150904) |  |              | TGGTA-ATTCTGT | TATTATTAAAT   | TTTTTATCAT  | TTTTTTTAT   | ---         | ACTTTT         | -----           | TAAATATTTTTTTTAAAT | TATT                |             |    |
| Candidatus Carsonella 135557 - 167442nt              | (15348)  |  |              | TGGTA-ATTCTGT | TATTATTAAAT   | TTTTTATCAT  | TTTTTTTAT   | ---         | ACTTTT         | -----           | TAAATATTTTTTTTAAAT | TATT                |             |    |
| SARS-CoV-2 Reference Genome NC_045512.2              | (14353)  |  |              | AGATGCA       | ATTCTGCATT    | GTGCAAC     | TTTAATGT    | TTTTATTCT   | CTACAG         | TGTTCCCACT      | TACAAGTTTT         | GGACCACTAGT         |             |    |
|                                                      |          |  | Section 1965 |               |               |             |             |             |                |                 |                    |                     |             |    |
|                                                      |          |  | (151229)     | 151229        | 151239        | 151250      | 151261      | 151272      | 151283         | 151294          | 151305             |                     |             |    |
| Candidatus Carsonella ruddii strain BT chromosome... | (150970) |  |              | TAAATTTCT     | TATTTGTTATAAT | TGGACCAAT   | TATCAGTTT   | CAGATCCAAC  | GGATCTCCT      | ATTTTTTAAAT     | TATTTTAAAC         |                     |             |    |
| Candidatus Carsonella 135557 - 167442nt              | (15414)  |  |              | TAAATTTCT     | TATTTGTTATAAT | TGGACCAAT   | TATCAGTTT   | CAGATCCAAC  | GGATCTCCT      | ATTTTTTAAAT     | TATTTTAAAC         |                     |             |    |
| SARS-CoV-2 Reference Genome NC_045512.2              | (14430)  |  |              | GAGAAAAA      | TATTTGTT      | GATGGT      | TGTTCCAT    | TGTAGTTT    | CAGCTGGAT      | ACC-ACTTC       | AGAGAGCTAGG        | TGTGTGTA            | CAT         |    |
|                                                      |          |  | Section 1966 |               |               |             |             |             |                |                 |                    |                     |             |    |
|                                                      |          |  | (151306)     | 151306        | 151316        | 151327      | 151338      | 151349      | 151360         | 151371          | 151382             |                     |             |    |
| Candidatus Carsonella ruddii strain BT chromosome... | (151047) |  |              | ATTCA--       | AATAAAATTT    | TAATAGTT    | TGTTAAAT    | TAAATGATT   | CATTTAAAT      | TATAAAAGTCT     | TAAAGCTGAACAT      | -CTT                |             |    |
| Candidatus Carsonella 135557 - 167442nt              | (15491)  |  |              | ATTCA--       | AATAAAATTT    | TAATAGTT    | TGTTAAAT    | TAAATGATT   | CATTTAAAT      | TATAAAAGTCT     | TAAAGCTGAACAT      | -CTT                |             |    |
| SARS-CoV-2 Reference Genome NC_045512.2              | (14506)  |  |              | AA            | TCAGGATGT     | AAAC        | TTACATAGCT  | CTAGACT     | ---            | TAGTTT          | TAAAGGAATTA        | CTTGTGTATGCT-GCTGAC | CCCTGCTA    |    |
|                                                      |          |  | Section 1967 |               |               |             |             |             |                |                 |                    |                     |             |    |
|                                                      |          |  | (151383)     | 151383        | 151393        | 151404      | 151415      | 151426      | 151437         | 151448          | 151459             |                     |             |    |
| Candidatus Carsonella ruddii strain BT chromosome... | (151121) |  |              | TGACCACAAC    | TTT           | TAAAGAAGATT | -CAAGAATAT  | CTATTACTAAT | TGTTCTATT      | AATGTAGAAGAA    | ATCAGCTAT          | CA                  |             |    |
| Candidatus Carsonella 135557 - 167442nt              | (15565)  |  |              | TGACCACAAC    | TTT           | TAAAGAAGATT | -CAAGAATAT  | CTATTACTAAT | TGTTCTATT      | AATGTAGAAGAA    | ATCAGCTAT          | CA                  |             |    |
| SARS-CoV-2 Reference Genome NC_045512.2              | (14579)  |  |              | TGCA          | GGTGCTTCT     | TGGTAATCT   | ATTACTAG    | ATAAACG     | --CACTAC       | GTG--CTTTTCA    | -GTAGCTGCA         | CTTACTAACA          |             |    |
|                                                      |          |  | Section 1968 |               |               |             |             |             |                |                 |                    |                     |             |    |
|                                                      |          |  | (151460)     | 151460        | 151470        | 151481      | 151492      | 151503      | 151514         | 151525          | 151536             |                     |             |    |
| Candidatus Carsonella ruddii strain BT chromosome... | (151197) |  |              | TTGTGTTT      | TAATCCTCC     | AGTTTCTG    | CTATTAAATTT | ATGTATAGG   | --TCTATTATCT-- | CTCATAATAAGATTT | TTATT              |                     |             |    |
| Candidatus Carsonella 135557 - 167442nt              | (15641)  |  |              | TTGTGTTT      | TAATCCTCC     | AGTTTCTG    | CTATTAAATTT | ATGTATAGG   | --TCTATTATCT-- | CTCATAATAAGATTT | TTATT              |                     |             |    |
| SARS-CoV-2 Reference Genome NC_045512.2              | (14651)  |  |              | ATGT          | TGCTTT        | TCAAAC      | TGTCAAAC    | CCGGTAATTT  | TAACAAG        | ACTTCTAT        | GACTTGT            | CTGTGTC             | TAAGGGTT--- | TC |



## SARS-CoV-2 &amp; Bakterien.apr

|                                                      |          | Section 1969 |                                                                                |        |        |        |        |        |               |
|------------------------------------------------------|----------|--------------|--------------------------------------------------------------------------------|--------|--------|--------|--------|--------|---------------|
|                                                      |          | (151537)     | 151537                                                                         | 151547 | 151558 | 151569 | 151580 | 151591 | 151602 151613 |
| Candidatus Carsonella ruddii strain BT chromosome... | (151270) |              | TATAAGATTAGCAATTTTATTAGAACCAGTAAATATAACACCATATATATCTTTATGAAATGATATTAATTACCAA   |        |        |        |        |        |               |
| Candidatus Carsonella 135557 - 167442nt              | (15714)  |              | TATAAGATTAGCAATTTTATTAGAACCAGTAAATATAACACCATATATATCTTTATGAAATGATATTAATTACCAA   |        |        |        |        |        |               |
| SARS-CoV-2 Reference Genome NC_045512.2              | (14725)  |              | TTTAAGGAAGGAAGTTCTGTTG-----AATTAAACAC-----TCTCTCTTTGCTCAG-GATGGTAAATGCTGCTA    |        |        |        |        |        |               |
|                                                      |          | Section 1970 |                                                                                |        |        |        |        |        |               |
|                                                      |          | (151614)     | 151614                                                                         | 151624 | 151635 | 151646 | 151657 | 151668 | 151679 151690 |
| Candidatus Carsonella ruddii strain BT chromosome... | (151347) |              | TAAAAGATCCTTTTCTCTAAATTAATTGACAAACACTAACAGGAATACCAGATTT-ATATAATAATTGTATTATTTT  |        |        |        |        |        |               |
| Candidatus Carsonella 135557 - 167442nt              | (15791)  |              | TAAAAGATCCTTTTCTCTAAATTAATTGACAAACACTAACAGGAATACCAGATTT-ATATAATAATTGTATTATTTT  |        |        |        |        |        |               |
| SARS-CoV-2 Reference Genome NC_045512.2              | (14789)  |              | TCAGCGAT--TATGACTACTATCGTT----ATAATCTACCAACAAATGTGTGATATCAGACAACTACTAT-TTGTAGT |        |        |        |        |        |               |
|                                                      |          | Section 1971 |                                                                                |        |        |        |        |        |               |
|                                                      |          | (151691)     | 151691                                                                         | 151701 | 151712 | 151723 | 151734 | 151745 | 151756 151767 |
| Candidatus Carsonella ruddii strain BT chromosome... | (151423) |              | AAAAGCTATTAAATGATGTACTTTCTGCAGGTTTAGCTAACACAACTTTCCTGTAAATTAATGCAGATATAGT--TTG |        |        |        |        |        |               |
| Candidatus Carsonella 135557 - 167442nt              | (15867)  |              | AAAAGCTATTAAATGATGTACTTTCTGCAGGTTTAGCTAACACAACTTTCCTGTAAATTAATGCAGATATAGT--TTG |        |        |        |        |        |               |
| SARS-CoV-2 Reference Genome NC_045512.2              | (14859)  |              | TGAAGTTGTTGATAA-GTACTTT--GATTGTT-----ACGATGGTGGCTGTAA-TTAATGCTAACCAAGTCAATCG   |        |        |        |        |        |               |
|                                                      |          | Section 1972 |                                                                                |        |        |        |        |        |               |
|                                                      |          | (151768)     | 151768                                                                         | 151778 | 151789 | 151800 | 151811 | 151822 | 151833 151844 |
| Candidatus Carsonella ruddii strain BT chromosome... | (151498) |              | ACCACAAAAAATTGCAATTGGAAAAATT--CCAAGGACTAATTGTAGAAATTATACCTTTTCTTCTATAAAAATAAAT |        |        |        |        |        |               |
| Candidatus Carsonella 135557 - 167442nt              | (15942)  |              | ACCACAAAAAATTGCAATTGGAAAAATT--CCAAGGACTAATTGTAGAAATTATACCTTTTCTTCTATAAAAATAAAT |        |        |        |        |        |               |
| SARS-CoV-2 Reference Genome NC_045512.2              | (14924)  |              | TCACACAACTAGACAATAAGCTGGTTTCCATTTAATAATGGGTAAAGGCTAGACTTTTATTATGATTCAATGAGT    |        |        |        |        |        |               |
|                                                      |          | Section 1973 |                                                                                |        |        |        |        |        |               |
|                                                      |          | (151845)     | 151845                                                                         | 151855 | 151866 | 151877 | 151888 | 151899 | 151910 151921 |
| Candidatus Carsonella ruddii strain BT chromosome... | (151573) |              | ATTGTTTTCTCCTGTATAATTAGGTAAATAAGAAATTTTGCAAATATTATATGCTTGATTGTATATAATTATTGCAAA |        |        |        |        |        |               |
| Candidatus Carsonella 135557 - 167442nt              | (16017)  |              | ATTGTTTTCTCCTGTATAATTAGGTAAATAAGAAATTTTGCAAATATTATATGCTTGATTGTATATAATTATTGCAAA |        |        |        |        |        |               |
| SARS-CoV-2 Reference Genome NC_045512.2              | (15001)  |              | TATGA-----GGATCAGATGCACTTTTCGCATATACAAAAAGTAATGT-CATCCCTACTATAAATCAAAATGAA     |        |        |        |        |        |               |
|                                                      |          | Section 1974 |                                                                                |        |        |        |        |        |               |
|                                                      |          | (151922)     | 151922                                                                         | 151932 | 151943 | 151954 | 151965 | 151976 | 151987 151998 |
| Candidatus Carsonella ruddii strain BT chromosome... | (151650) |              | AATCTATTGCTTCTTTAATATCAGAACTGAATCTAAAAATTGTTTTCTTGCTTCTTTACAACATAAAAAATTATTAAT |        |        |        |        |        |               |
| Candidatus Carsonella 135557 - 167442nt              | (16094)  |              | AATCTATTGCTTCTTTAATATCAGAACTGAATCTAAAAATTGTTTTCTTGCTTCTTTACAACATAAAAAATTATTAAT |        |        |        |        |        |               |
| SARS-CoV-2 Reference Genome NC_045512.2              | (15069)  |              | TCTTAAGTATGCCATTAGTGC-CAAGAATAGAGCTCGCAACCGTAGCTGGTGTCTCTATCTG--TAGTACTATGAC-  |        |        |        |        |        |               |

SARS-CoV-2 & Bakterien.apr

|                                                      |          |          | Section 1975      |             |                |             |                                    |                            |           |                               |
|------------------------------------------------------|----------|----------|-------------------|-------------|----------------|-------------|------------------------------------|----------------------------|-----------|-------------------------------|
|                                                      |          |          | 151999            | 152009      | 152020         | 152031      | 152042                             | 152053                     | 152064    | 152075                        |
| Candidatus Carsonella ruddii strain BT chromosome... | (151999) | (151727) | TCAATAAAATTTT     | TTGTAAAT    | AAATGAAATAAA   | TTTTT       | TAATAAATATAACT                     | TTTTTATCAATGCTAATTAATTTCCA |           |                               |
| Candidatus Carsonella 135557 - 167442nt              | (16171)  |          | TCAATAAAATTTT     | TTGTAAAT    | AAATGAAATAAA   | TTTTT       | TAATAAATATAACT                     | TTTTTATCAATGCTAATTAATTTCCA |           |                               |
| SARS-CoV-2 Reference Genome NC_045512.2              | (15141)  |          | -CAATA            | GACAGTTT    | CATC           | AAA         | AATTA                              | TTGAAA                     | ----      | TC                            |
|                                                      |          |          | Section 1976      |             |                |             |                                    |                            |           |                               |
|                                                      |          |          | 152076            | 152086      | 152097         | 152108      | 152119                             | 152130                     | 152141    | 152152                        |
| Candidatus Carsonella ruddii strain BT chromosome... | (152076) | (151804) | AAATTTAAAGATTG    | TTTAATAT    | TTTTATTGAATTAT | TTATACA     | -TTTATCATGGTATACAAATACCATTAATAAAAA |                            |           |                               |
| Candidatus Carsonella 135557 - 167442nt              | (16248)  |          | AAATTTAAAGATTG    | TTTAATAT    | TTTTATTGAATTAT | TTATACA     | -TTTATCATGGTATACAAATACCATTAATAAAAA |                            |           |                               |
| SARS-CoV-2 Reference Genome NC_045512.2              | (15211)  |          | ACA               | ---         | AGCA           | AATTC       | TA                                 | TGGTGG                     | TTGGC     | CAACATG                       |
|                                                      |          |          | Section 1977      |             |                |             |                                    |                            |           |                               |
|                                                      |          |          | 152153            | 152163      | 152174         | 152185      | 152196                             | 152207                     | 152218    | 152229                        |
| Candidatus Carsonella ruddii strain BT chromosome... | (152153) | (151880) | AAATTTATTAGAAGGTG | ATATTGAAAT  | TATTTT         | TTTATTTT    | TATTA                              | AAAGAA                     | TTAGCA    | ATATAATTTTTTTTATC             |
| Candidatus Carsonella 135557 - 167442nt              | (16324)  |          | AAATTTATTAGAAGGTG | ATATTGAAAT  | TATTTT         | TTTATTTT    | TATTA                              | AAAGAA                     | TTAGCA    | ATATAATTTTTTTTATC             |
| SARS-CoV-2 Reference Genome NC_045512.2              | (15281)  |          | -----             | TTA         | TGGG           | TG          | GGATT                              | ATCC                       | TAA       | ATGTA                         |
|                                                      |          |          | Section 1978      |             |                |             |                                    |                            |           |                               |
|                                                      |          |          | 152230            | 152240      | 152251         | 152262      | 152273                             | 152284                     | 152295    | 152306                        |
| Candidatus Carsonella ruddii strain BT chromosome... | (152230) | (151957) | AAAAATTATTATTT    | TTTTT       | TTAAAAA        | ATACATAAAAA | TGACAAGAAATGTTTAAAT                | TTATAAAAA                  | ATTAAAAA  | TATCTCTTT                     |
| Candidatus Carsonella 135557 - 167442nt              | (16401)  |          | AAAAATTATTATTT    | TTTTT       | TTAAAAA        | ATACATAAAAA | TGACAAGAAATGTTTAAAT                | TTATAAAAA                  | ATTAAAAA  | TATCTCTTT                     |
| SARS-CoV-2 Reference Genome NC_045512.2              | (15342)  |          | CTC               | ACTTGTTT    | CTTGC          | TCGC        | AAAC                               | ATACA                      | ACGTGT    | TGTAGCTTGT                    |
|                                                      |          |          | Section 1979      |             |                |             |                                    |                            |           |                               |
|                                                      |          |          | 152307            | 152317      | 152328         | 152339      | 152350                             | 152361                     | 152372    | 152383                        |
| Candidatus Carsonella ruddii strain BT chromosome... | (152307) | (152034) | TACCTCCAAATAAAT   | CTATAGAAATG | -GTAATTTT      | TATATATTT   | ---                                | ATCATT                     | TTTAAATAA | -ATAATGAATTAA                 |
| Candidatus Carsonella 135557 - 167442nt              | (16478)  |          | TACCTCCAAATAAAT   | CTATAGAAATG | -GTAATTTT      | TATATATTT   | ---                                | ATCATT                     | TTTAAATAA | -ATAATGAATTAA                 |
| SARS-CoV-2 Reference Genome NC_045512.2              | (15418)  |          | GCT               | CAAGT       | ATTG           | AGTGA       | AATG                               | GTCATG                     | TGTGGCGG  | TTCACTATATG                   |
|                                                      |          |          | Section 1980      |             |                |             |                                    |                            |           |                               |
|                                                      |          |          | 152384            | 152394      | 152405         | 152416      | 152427                             | 152438                     | 152449    | 152460                        |
| Candidatus Carsonella ruddii strain BT chromosome... | (152384) | (152106) | TTAATATTTT        | TTTCATAT    | TAGTAT         | TTTTTA      | TTTACCACT                          | TTTGT                      | TTACAAA   | AAGATGAATTTGCACCATTTTCTAATAAT |
| Candidatus Carsonella 135557 - 167442nt              | (16550)  |          | TTAATATTTT        | TTTCATAT    | TAGTAT         | TTTTTA      | TTTACCACT                          | TTTGT                      | TTACAAA   | AAGATGAATTTGCACCATTTTCTAATAAT |
| SARS-CoV-2 Reference Genome NC_045512.2              | (15495)  |          | CAC               | AAC         | TGC            | TTAT        | GCTA                               | AAGT                       | TTTTTA    | ----                          |

| Section 1981                                         |          |                        |                     |                     |                  |                 |               |            |                      |
|------------------------------------------------------|----------|------------------------|---------------------|---------------------|------------------|-----------------|---------------|------------|----------------------|
|                                                      | (152461) | 152461                 | 152471              | 152482              | 152493           | 152504          | 152515        | 152526     | 152537               |
| Candidatus Carsonella ruddii strain BT chromosome... | (152183) | CTTCTTACTAAATAAGGTAAT  | TAATTCCTTTATATTTT   | CCTATAGGAGCATATTTCT | TCTACATACATATA   | ---             | ACTTTT        | -TA        |                      |
| Candidatus Carsonella 135557 - 167442nt              | (16627)  | CTTCTTACTAAATAAGGTAAT  | TAATTCCTTTATATTTT   | CCTATAGGAGCATATTTCT | TCTACATACATATA   | ---             | ACTTTT        | -TA        |                      |
| SARS-CoV-2 Reference Genome NC_045512.2              | (15559)  | CTTTTATCTACTGATGGTAA   | CAA-----            | AATTGCCGATA         | --               | AGTATGTCGCCAATT | TACAAC        | CAGACTTTT  | ATG                  |
| Section 1982                                         |          |                        |                     |                     |                  |                 |               |            |                      |
|                                                      | (152538) | 152538                 | 152548              | 152559              | 152570           | 152581          | 152592        | 152603     | 152614               |
| Candidatus Carsonella ruddii strain BT chromosome... | (152256) | ATTTTCTTAATGAGTTATAAA  | CTACATCAGCCATAC     | CATATAATTTT         | TGAAATCTAATTTTCT | ATCTTTT         | CTAAA         |            |                      |
| Candidatus Carsonella 135557 - 167442nt              | (16700)  | ATTTTCTTAATGAGTTATAAA  | CTACATCAGCCATAC     | CATATAATTTT         | TGAAATCTAATTTTCT | ATCTTTT         | CTAAA         |            |                      |
| SARS-CoV-2 Reference Genome NC_045512.2              | (15626)  | AGTGTCTCTAT            | -AGAAATAGAGATGTT    | GACACAGAC-----      | TTTGTGAA         | -TGAGTTT        | TACGCATA      | TTT        | TGCGTAAA             |
| Section 1983                                         |          |                        |                     |                     |                  |                 |               |            |                      |
|                                                      | (152615) | 152615                 | 152625              | 152636              | 152647           | 152658          | 152669        | 152680     | 152691               |
| Candidatus Carsonella ruddii strain BT chromosome... | (152333) | ATTGTAATAA--           | ATGAAATTGTTTGAATATT | TGAGTTGCAAAC        | TGAGGTAAATATTGTT | TTTTACAAC       | CATTTTGAT     |            |                      |
| Candidatus Carsonella 135557 - 167442nt              | (16777)  | ATTGTAATAA--           | ATGAAATTGTTTGAATATT | TGAGTTGCAAAC        | TGAGGTAAATATTGTT | TTTTACAAC       | CATTTTGAT     |            |                      |
| SARS-CoV-2 Reference Genome NC_045512.2              | (15694)  | CATTCTCTCAA            | TGATGATCTCTCTGA     | CGATGCTG--          | TTG-----         | TGTGTTTC        | AAATGCAC      | TTATG--    | CATCTCAAG            |
| Section 1984                                         |          |                        |                     |                     |                  |                 |               |            |                      |
|                                                      | (152692) | 152692                 | 152702              | 152713              | 152724           | 152735          | 152746        | 152757     | 152768               |
| Candidatus Carsonella ruddii strain BT chromosome... | (152408) | AATAAATACATTGAAC       | AAAATAAATATGATAAA   | TCAGTGC             | AAAATTTT         | TTAATATAAACT    | TGGATACATATTT | AAAATT     |                      |
| Candidatus Carsonella 135557 - 167442nt              | (16852)  | AATAAATACATTGAAC       | AAAATAAATATGATAAA   | TCAGTGC             | AAAATTTT         | TTAATATAAACT    | TGGATACATATTT | AAAATT     |                      |
| SARS-CoV-2 Reference Genome NC_045512.2              | (15761)  | GTCTAGTGGCTAGCAT       | AAAGAACTT----       | TAAATCAGTT          | CTTTATTAT        | CAAAA--         | ACAATGTTT     | TTTATGTTCT | GAAAGC               |
| Section 1985                                         |          |                        |                     |                     |                  |                 |               |            |                      |
|                                                      | (152769) | 152769                 | 152779              | 152790              | 152801           | 152812          | 152823        | 152834     | 152845               |
| Candidatus Carsonella ruddii strain BT chromosome... | (152485) | TAAAAATTGTGC--         | ATTTTAACTTCATAAT    | TCCCAATAAGCA        | CCCTTTAA--       | CTAATCTTACA--   | GGTATTTTTT    | ---        | GT                   |
| Candidatus Carsonella 135557 - 167442nt              | (16929)  | TAAAAATTGTGC--         | ATTTTAACTTCATAAT    | TCCCAATAAGCA        | CCCTTTAA--       | CTAATCTTACA--   | GGTATTTTTT    | ---        | GT                   |
| SARS-CoV-2 Reference Genome NC_045512.2              | (15831)  | AAAA                   | TGTTG               | ACTGAGACTGAC        | CTTAC            | TAAAGGACCT      | CATGAATTTT    | GCTCTCAAC  | ATACATGCTAGTTAAACAGG |
| Section 1986                                         |          |                        |                     |                     |                  |                 |               |            |                      |
|                                                      | (152846) | 152846                 | 152856              | 152867              | 152878           | 152889          | 152900        | 152911     | 152922               |
| Candidatus Carsonella ruddii strain BT chromosome... | (152554) | TGTGTTTATCATAAGCAATTTT | TATTAATCCAAATATAAAG | CAGGTAAAG           | GCTCTTTT         | TAGAATAAGCTT    | GAAATTACCAACC |            |                      |
| Candidatus Carsonella 135557 - 167442nt              | (16998)  | TGTGTTTATCATAAGCAATTTT | TATTAATCCAAATATAAAG | CAGGTAAAG           | GCTCTTTT         | TAGAATAAGCTT    | GAAATTACCAACC |            |                      |
| SARS-CoV-2 Reference Genome NC_045512.2              | (15908)  | GTGATGATATATGT         | GTACCTTCC           | TTA--CC             | CAGATCCAT        | CAAG--AA--      | TCC--TAG      | GGGCCG     | GCTGTTTGTAGATG       |

SARS-CoV-2 & Bakterien.apr

|                                                      |          |          |        |         |        |          |        |          |        | Section 1987 |         |          |         |         |           |            |         |       |       |        |      |      |    |     |      |
|------------------------------------------------------|----------|----------|--------|---------|--------|----------|--------|----------|--------|--------------|---------|----------|---------|---------|-----------|------------|---------|-------|-------|--------|------|------|----|-----|------|
|                                                      |          |          |        |         |        |          |        |          |        | 152923       | 152933  | 152944   | 152955  | 152966  | 152977    | 152988     | 152999  |       |       |        |      |      |    |     |      |
| Candidatus Carsonella ruddii strain BT chromosome... | (152631) | (152923) | CAAAAC | TATTCCA | ATATAA | CAATATTT | TGTAT  | AAAATATT | TCACT  | TAAATAAA     | TATAAAT | TTAATT   | CCATT   | CTAT    | CA        |            |         |       |       |        |      |      |    |     |      |
| Candidatus Carsonella 135557 - 167442nt              | (17075)  | (152923) | CAAAAC | TATTCCA | ATATAA | CAATATTT | TGTAT  | AAAATATT | TCACT  | TAAATAAA     | TATAAAT | TTAATT   | CCATT   | CTAT    | CA        |            |         |       |       |        |      |      |    |     |      |
| SARS-CoV-2 Reference Genome NC_045512.2              | (15977)  | (152923) | AT     | TCGTA   | AAAAC  | AGAT     | GGTAC  | AC       | TTAT   | GAT          | TGAA    | CGGTT    | CGTGT   | CTTT    | TAGC      | TATAGAT    | GCTTAC  | CCAC  | TTAC  | TAA    |      |      |    |     |      |
|                                                      |          |          |        |         |        |          |        |          |        | Section 1988 |         |          |         |         |           |            |         |       |       |        |      |      |    |     |      |
|                                                      |          |          |        |         |        |          |        |          |        | 153000       | 153010  | 153021   | 153032  | 153043  | 153054    | 153065     | 153076  |       |       |        |      |      |    |     |      |
| Candidatus Carsonella ruddii strain BT chromosome... | (152708) | (153000) | CAT    | TCT     | TCAG   | CATCTAT  | TGTT   | TAAAGAT  | GAA    | TTTGCT       | TTTTT   | TAAACAC  | CTAT    | TAC     | TAAAATTTT | TAAAATAGGA | ATTAA   |       |       |        |      |      |    |     |      |
| Candidatus Carsonella 135557 - 167442nt              | (17152)  | (153000) | CAT    | TCT     | TCAG   | CATCTAT  | TGTT   | TAAAGAT  | GAA    | TTTGCT       | TTTTT   | TAAACAC  | CTAT    | TAC     | TAAAATTTT | TAAAATAGGA | ATTAA   |       |       |        |      |      |    |     |      |
| SARS-CoV-2 Reference Genome NC_045512.2              | (16053)  | (153000) | ACAT   | TCCT    | TAAT   | TCAGGAG  | TA--   | TGCT     | GATG   | TC           | TTT     | -CAT     | TTTGTA  | CTTA    | CAAT      | ACA        | TAA     | GAA   | AGC   | TAC    | AT   | GT   | AT | GAG | TTAA |
|                                                      |          |          |        |         |        |          |        |          |        | Section 1989 |         |          |         |         |           |            |         |       |       |        |      |      |    |     |      |
|                                                      |          |          |        |         |        |          |        |          |        | 153077       | 153087  | 153098   | 153109  | 153120  | 153131    | 153142     | 153153  |       |       |        |      |      |    |     |      |
| Candidatus Carsonella ruddii strain BT chromosome... | (152785) | (153077) | ATCTCT | TATAT   | ACTA   | TATTG    | CT     | TATTAG   | AAAAAG | CAATAT       | TTAGGAT | TTAAAGCT | GATAAT  | TTAATAG | AAACAG    | TTG        | GAA     |       |       |        |      |      |    |     |      |
| Candidatus Carsonella 135557 - 167442nt              | (17229)  | (153077) | ATCTCT | TATAT   | ACTA   | TATTG    | CT     | TATTAG   | AAAAAG | CAATAT       | TTAGGAT | TTAAAGCT | GATAAT  | TTAATAG | AAACAG    | TTG        | GAA     |       |       |        |      |      |    |     |      |
| SARS-CoV-2 Reference Genome NC_045512.2              | (16127)  | (153077) | CAGGAC | ACAT    | GT     | TAGACA   | TG     | TATT     | CTGTT  | AT           | GCT     | TAC      | TAA     | TGAT    | --AA      | CACT       | TC-AA   | GGTA  | TTGG  | GAA    | CTGA | GTTT |    |     |      |
|                                                      |          |          |        |         |        |          |        |          |        | Section 1990 |         |          |         |         |           |            |         |       |       |        |      |      |    |     |      |
|                                                      |          |          |        |         |        |          |        |          |        | 153154       | 153164  | 153175   | 153186  | 153197  | 153208    | 153219     | 153230  |       |       |        |      |      |    |     |      |
| Candidatus Carsonella ruddii strain BT chromosome... | (152862) | (153154) | TAC    | GAT     | -CTAT  | ATTTAA   | ACCTAA | ATAACT   | ATTACT | TAATAT       | TATTA   | AATTAT   | TTT     | TAAATAT | TGAT      | TAAAAA     | ATTTTT  |       |       |        |      |      |    |     |      |
| Candidatus Carsonella 135557 - 167442nt              | (17306)  | (153154) | TAC    | GAT     | -CTAT  | ATTTAA   | ACCTAA | ATAACT   | ATTACT | TAATAT       | TATTA   | AATTAT   | TTT     | TAAATAT | TGAT      | TAAAAA     | ATTTTT  |       |       |        |      |      |    |     |      |
| SARS-CoV-2 Reference Genome NC_045512.2              | (16201)  | (153154) | TAT    | GAGG    | CTAT   | GTAC     | ACACC  | GCA      | TACAG  | TC           | TTAC    | --AG     | GC      | TGTT    | GGGGC     | TTG        | TGTTCT  | TTTGC | AATTC | ACAGAC | TT-- |      |    |     |      |
|                                                      |          |          |        |         |        |          |        |          |        | Section 1991 |         |          |         |         |           |            |         |       |       |        |      |      |    |     |      |
|                                                      |          |          |        |         |        |          |        |          |        | 153231       | 153241  | 153252   | 153263  | 153274  | 153285    | 153296     | 153307  |       |       |        |      |      |    |     |      |
| Candidatus Carsonella ruddii strain BT chromosome... | (152938) | (153231) | TG     | CAT     | CATAA  | TATG     | TAA    | TG       | CTGCTT | CACCTAA      | CATATCA | AAAAGA   | ATAA    | TATTT   | TATCTG    | ATAA       | AGATTTT | TTTA  |       |        |      |      |    |     |      |
| Candidatus Carsonella 135557 - 167442nt              | (17382)  | (153231) | TG     | CAT     | CATAA  | TATG     | TAA    | TG       | CTGCTT | CACCTAA      | CATATCA | AAAAGA   | ATAA    | TATTT   | TATCTG    | ATAA       | AGATTTT | TTTA  |       |        |      |      |    |     |      |
| SARS-CoV-2 Reference Genome NC_045512.2              | (16274)  | (153231) | --CAT  | --TAA   | GATG   | ----     | TG     | TGCTT    | G----- | CATA         | CGT     | AGACC    | AT----- | TCTTAT  | GTTG      | TAA--      | ATGC    | TGTTA |       |        |      |      |    |     |      |
|                                                      |          |          |        |         |        |          |        |          |        | Section 1992 |         |          |         |         |           |            |         |       |       |        |      |      |    |     |      |
|                                                      |          |          |        |         |        |          |        |          |        | 153308       | 153318  | 153329   | 153340  | 153351  | 153362    | 153373     | 153384  |       |       |        |      |      |    |     |      |
| Candidatus Carsonella ruddii strain BT chromosome... | (153015) | (153308) | TAG    | CTGA    | AATTT  | TCATTT   | TGA    | GA       | AATAA  | CAAAAT       | TTTTT   | TTCC     | TATAT   | TTTTC   | ATAAC     | CATAAT     | TTGAAAA | AAAAA | CAATT |        |      |      |    |     |      |
| Candidatus Carsonella 135557 - 167442nt              | (17459)  | (153308) | TAG    | CTGA    | AATTT  | TCATTT   | TGA    | GA       | AATAA  | CAAAAT       | TTTTT   | TTCC     | TATAT   | TTTTC   | ATAAC     | CATAAT     | TTGAAAA | AAAAA | CAATT |        |      |      |    |     |      |
| SARS-CoV-2 Reference Genome NC_045512.2              | (16329)  | (153308) | CGA    | CA--    | TGTC   | ATAT     | CAAC   | ATCA     | CA     | TAAATT       | AGT     | CTTG     | CTG     | TTAATC  | ----      | CGTATG     | TTTGC   | AA    | TGCTC | CAGGT  |      |      |    |     |      |

## SARS-CoV-2 &amp; Bakterien.apr

|                                                      |          | Section 1993 |                                              |               |             |            |             |             |                          |
|------------------------------------------------------|----------|--------------|----------------------------------------------|---------------|-------------|------------|-------------|-------------|--------------------------|
|                                                      |          | (153385)     | 153385                                       | 153395        | 153406      | 153417     | 153428      | 153439      | 153450 153461            |
| Candidatus Carsonella ruddii strain BT chromosome... | (153092) |              | ATTTTCTAAAAACAAATATAATTAAATTATAATTA          | -----         | TTTACATTTT  | TTTGTGTA   | AAAAAATTTG  | AAACAAAA    |                          |
| Candidatus Carsonella 135557 - 167442nt              | (17536)  |              | ATTTTCTAAAAACAAATATAATTAAATTATAATTA          | -----         | TTTACATTTT  | TTTGTGTA   | AAAAAATTTG  | AAACAAAA    |                          |
| SARS-CoV-2 Reference Genome NC_045512.2              | (16399)  |              | TGTGATGTCA                                   | ---CAGATGTGAC | TCAACCTTAC  | TTAGGAGGTA | TGAGCTATTAT | TTGTAAATC   | ACATAAACCACCAT           |
|                                                      |          | Section 1994 |                                              |               |             |            |             |             |                          |
|                                                      |          | (153462)     | 153462                                       | 153472        | 153483      | 153494     | 153505      | 153516      | 153527 153538            |
| Candidatus Carsonella ruddii strain BT chromosome... | (153164) |              | TCTATTATCATATTATAAAAAATAATTTTCCAATATTCTGAAGA | -ATAATAATA    | TTTCCATTCTT | CAAAA      | GATAATT     |             |                          |
| Candidatus Carsonella 135557 - 167442nt              | (17608)  |              | TCTATTATCATATTATAAAAAATAATTTTCCAATATTCTGAAGA | -ATAATAATA    | TTTCCATTCTT | CAAAA      | GATAATT     |             |                          |
| SARS-CoV-2 Reference Genome NC_045512.2              | (16473)  |              | TAGTTTTC                                     | CATGTGTG----  | TAATGGA     | CAGTTT     | TGTTTATATAA | AAATACATGTG | TTGGT--AGCGATAATG        |
|                                                      |          | Section 1995 |                                              |               |             |            |             |             |                          |
|                                                      |          | (153539)     | 153539                                       | 153549        | 153560      | 153571     | 153582      | 153593      | 153604 153615            |
| Candidatus Carsonella ruddii strain BT chromosome... | (153240) |              | TATCTTTTATAAAAGAATTAGATGTAAATAATCTGGAA       | TTCTTAATAA    | --AGATTCT   | GTCTAACAC  | ATCATT      | TGTA        |                          |
| Candidatus Carsonella 135557 - 167442nt              | (17684)  |              | TATCTTTTATAAAAGAATTAGATGTAAATAATCTGGAA       | TTCTTAATAA    | --AGATTCT   | GTCTAACAC  | ATCATT      | TGTA        |                          |
| SARS-CoV-2 Reference Genome NC_045512.2              | (16544)  |              | TTACTGACTTT                                  | AAATGCAATTG   | CAACATGTG   | ACTGGACAA  | ATGCTGGTGA  | TTACATT     | TTAGCTAACACCTGTACTGAA    |
|                                                      |          | Section 1996 |                                              |               |             |            |             |             |                          |
|                                                      |          | (153616)     | 153616                                       | 153626        | 153637      | 153648     | 153659      | 153670      | 153681 153692            |
| Candidatus Carsonella ruddii strain BT chromosome... | (153315) |              | TTCTTCCTTAGTACTTAAATTATAAATATTTAATA          | -TATTTATCTAT  | ATTATCTAAAT | ---TTGTGT  | TTTTTCTACT  |             |                          |
| Candidatus Carsonella 135557 - 167442nt              | (17759)  |              | TTCTTCCTTAGTACTTAAATTATAAATATTTAATA          | -TATTTATCTAT  | ATTATCTAAAT | ---TTGTGT  | TTTTTCTACT  |             |                          |
| SARS-CoV-2 Reference Genome NC_045512.2              | (16621)  |              | AGACT--CAAGC                                 | TTTTTGCAGC    | AGAAACGC    | TCAAAGC    | TACTGAGGAG  | ACATTTAA    | ACTGCTTTATGGTATTGCTACT   |
|                                                      |          | Section 1997 |                                              |               |             |            |             |             |                          |
|                                                      |          | (153693)     | 153693                                       | 153703        | 153714      | 153725     | 153736      | 153747      | 153758 153769            |
| Candidatus Carsonella ruddii strain BT chromosome... | (153388) |              | TT-CATTAATTAAACTATAAGAAATGTTCTACATTATCG      | AAAAAATCATTTG | AAAAAGAA    | CAATTTTTT  | TAAA-AT     |             |                          |
| Candidatus Carsonella 135557 - 167442nt              | (17832)  |              | TT-CATTAATTAAACTATAAGAAATGTTCTACATTATCG      | AAAAAATCATTTG | AAAAAGAA    | CAATTTTTT  | TAAA-AT     |             |                          |
| SARS-CoV-2 Reference Genome NC_045512.2              | (16696)  |              | GACGTGAAGTGCTGT                              | CTGACAGAGAA   | TTACATCTTT  | CATCGGAA   | GTGGTAA     | -ACCTAGAC   | CAACACTTAACCGAA          |
|                                                      |          | Section 1998 |                                              |               |             |            |             |             |                          |
|                                                      |          | (153770)     | 153770                                       | 153780        | 153791      | 153802     | 153813      | 153824      | 153835 153846            |
| Candidatus Carsonella ruddii strain BT chromosome... | (153463) |              | ATTAAATAAATAGATATTTTCATCTATTAAAGTAATAT       | TACTTACTAT    | GTGTTTAA    | AAAAAAT    | TATAAG      | TCATATTTT   |                          |
| Candidatus Carsonella 135557 - 167442nt              | (17907)  |              | ATTAAATAAATAGATATTTTCATCTATTAAAGTAATAT       | TACTTACTAT    | GTGTTTAA    | AAAAAAT    | TATAAG      | TCATATTTT   |                          |
| SARS-CoV-2 Reference Genome NC_045512.2              | (16772)  |              | ATTATGTC                                     | TTACTGGTTAT   | CTGTGTA     | ACTAAAA    | CAGTAAG     | TACAAATAGGA | GAGTACACCTTTGAAAAAGGTGAC |

SARS-CoV-2 & Bakterien.apr

| Section 1999                                         |          |                 |                   |                 |                                                 |                   |                                  |               |        |
|------------------------------------------------------|----------|-----------------|-------------------|-----------------|-------------------------------------------------|-------------------|----------------------------------|---------------|--------|
|                                                      | (153847) | 153847          | 153857            | 153868          | 153879                                          | 153890            | 153901                           | 153912        | 153923 |
| Candidatus Carsonella ruddii strain BT chromosome... | (153540) | TTTAAAT         | TATAATAAT         | TGTTTAATTGGGTT  | --AGTAATTATATATATAAAAGCTCCTATTTTTGTAAAGTGAAGATT | TGA               |                                  |               |        |
| Candidatus Carsonella 135557 - 167442nt              | (17984)  | TTTAAAT         | TATAATAAT         | TGTTTAATTGGGTT  | --AGTAATTATATATATAAAAGCTCCTATTTTTGTAAAGTGAAGATT | TGA               |                                  |               |        |
| SARS-CoV-2 Reference Genome NC_045512.2              | (16849)  | TATGG-TGATGCTGT | TGTTTA            | CCGAGGTACA      | CAACCTTACA                                      | AATTAATGTTGGT     | TGATTAT-TTT                      | GTGCTGACATCA  |        |
| Section 2000                                         |          |                 |                   |                 |                                                 |                   |                                  |               |        |
|                                                      | (153924) | 153924          | 153934            | 153945          | 153956                                          | 153967            | 153978                           | 153989        | 154000 |
| Candidatus Carsonella ruddii strain BT chromosome... | (153615) | GAGATGGAAAT     | CAATCTTTA         | ATTAA           | TGGATATGATAT                                    | TAAAAA            | AAATAGAAATTTGGAATATTCTTTTAAATATA |               |        |
| Candidatus Carsonella 135557 - 167442nt              | (18059)  | GAGATGGAAAT     | CAATCTTTA         | ATTAA           | TGGATATGATAT                                    | TAAAAA            | AAATAGAAATTTGGAATATTCTTTTAAATATA |               |        |
| SARS-CoV-2 Reference Genome NC_045512.2              | (16924)  | CATACAGTAA      | TGCC-----         | ATTAA           | GTGCACCTACACTA                                  | GTGCCACAA         | GAGCACTATGTTAGAA                 | TTACTGGCTTATA |        |
| Section 2001                                         |          |                 |                   |                 |                                                 |                   |                                  |               |        |
|                                                      | (154001) | 154001          | 154011            | 154022          | 154033                                          | 154044            | 154055                           | 154066        | 154077 |
| Candidatus Carsonella ruddii strain BT chromosome... | (153692) | GGAATAAAACAA    | -ATCGTTAT         | TGGGTTTCCT      | TCATCAAA                                        | TAAACATGATTACA    | ATTTTATAAAGTATTTAATTAATA         |               |        |
| Candidatus Carsonella 135557 - 167442nt              | (18136)  | GGAATAAAACAA    | -ATCGTTAT         | TGGGTTTCCT      | TCATCAAA                                        | TAAACATGATTACA    | ATTTTATAAAGTATTTAATTAATA         |               |        |
| SARS-CoV-2 Reference Genome NC_045512.2              | (16995)  | CCCACACTCAA     | TATCTCAGA         | TGAGTTTCT       | AGCAATGT                                        | TGCAAA            | TATCAAAAGGTTGGTATGCA--AAAGTATTC  |               |        |
| Section 2002                                         |          |                 |                   |                 |                                                 |                   |                                  |               |        |
|                                                      | (154078) | 154078          | 154088            | 154099          | 154110                                          | 154121            | 154132                           | 154143        | 154154 |
| Candidatus Carsonella ruddii strain BT chromosome... | (153768) | ATAAATTAATTA    | AAAAAATA          | TAAC            | TGATCTGTAT                                      | TAGTTCCAT-GTAAAAA | AAATCTTATAGATTTAAGTTTTAA         |               |        |
| Candidatus Carsonella 135557 - 167442nt              | (18212)  | ATAAATTAATTA    | AAAAAATA          | TAAC            | TGATCTGTAT                                      | TAGTTCCAT-GTAAAAA | AAATCTTATAGATTTAAGTTTTAA         |               |        |
| SARS-CoV-2 Reference Genome NC_045512.2              | (17070)  | TACACTCCAGG     | ACCACCTGGTACTG    | GTAAGAGT        | CATTTTGTCTATT                                   | TGGCCTAGCTCTCT    | ACTACCCCTCTGCTCGCA               |               |        |
| Section 2003                                         |          |                 |                   |                 |                                                 |                   |                                  |               |        |
|                                                      | (154155) | 154155          | 154165            | 154176          | 154187                                          | 154198            | 154209                           | 154220        | 154231 |
| Candidatus Carsonella ruddii strain BT chromosome... | (153844) | TA-TGATTAAAA    | TTTAGATAATGCAGTTT | TACATTTATATAAT  | TCTGTATCTAAAAATCAAA                             | GAAAAAAGTATTT     |                                  |               |        |
| Candidatus Carsonella 135557 - 167442nt              | (18288)  | TA-TGATTAAAA    | TTTAGATAATGCAGTTT | TACATTTATATAAT  | TCTGTATCTAAAAATCAAA                             | GAAAAAAGTATTT     |                                  |               |        |
| SARS-CoV-2 Reference Genome NC_045512.2              | (17147)  | TAGTGTATACAGC   | TTGCTCTCATGC      | CGCTGT-----     | TGATGCAC                                        | TATGTGAGAA        | G---GCATTAAA                     | ATATTT        |        |
| Section 2004                                         |          |                 |                   |                 |                                                 |                   |                                  |               |        |
|                                                      | (154232) | 154232          | 154242            | 154253          | 154264                                          | 154275            | 154286                           | 154297        | 154308 |
| Candidatus Carsonella ruddii strain BT chromosome... | (153920) | AAATTTAATA      | AAAAA             | AAACTTTGAAATTTT | CATTAGAAA                                       | AGTA-TAAAA        | TATACTATTTCAATTATA               | AAAAAATA      |        |
| Candidatus Carsonella 135557 - 167442nt              | (18364)  | AAATTTAATA      | AAAAA             | AAACTTTGAAATTTT | CATTAGAAA                                       | AGTA-TAAAA        | TATACTATTTCAATTATA               | AAAAAATA      |        |
| SARS-CoV-2 Reference Genome NC_045512.2              | (17211)  | GCCT--ATA       | GATAAA            | TGTAGTAGAA      | TTATACCT--GCACGT                                | GCTCGTGTAGAG      | TGTTT--TGATAAA                   | TTCAAAGT      |        |

SARS-CoV-2 & Bakterien.apr

| Section 2005                                         |          |              |                |             |                     |                                  |                 |             |             |                 |           |           |           |     |   |      |    |   |     |      |    |      |      |    |    |   |    |   |    |     |    |    |   |   |   |   |   |   |   |   |   |   |   |   |   |   |   |
|------------------------------------------------------|----------|--------------|----------------|-------------|---------------------|----------------------------------|-----------------|-------------|-------------|-----------------|-----------|-----------|-----------|-----|---|------|----|---|-----|------|----|------|------|----|----|---|----|---|----|-----|----|----|---|---|---|---|---|---|---|---|---|---|---|---|---|---|---|
|                                                      | (154309) | 154309       | 154319         | 154330      | 154341              | 154352                           | 154363          | 154374      | 154385      |                 |           |           |           |     |   |      |    |   |     |      |    |      |      |    |    |   |    |   |    |     |    |    |   |   |   |   |   |   |   |   |   |   |   |   |   |   |   |
| Candidatus Carsonella ruddii strain BT chromosome... | (153996) | AAAACATTCATT | TTCAAT         | TATTCTC     | -CTGAAAGTT          | TTTTTCAGATAGTGAATTATTT           | TTTTTC          | AAAAAAA     | ATTTCTTTT   |                 |           |           |           |     |   |      |    |   |     |      |    |      |      |    |    |   |    |   |    |     |    |    |   |   |   |   |   |   |   |   |   |   |   |   |   |   |   |
| Candidatus Carsonella 135557 - 167442nt              | (18440)  | AAAACATTCATT | TTCAAT         | TATTCTC     | -CTGAAAGTT          | TTTTTCAGATAGTGAATTATTT           | TTTTTC          | AAAAAAA     | ATTTCTTTT   |                 |           |           |           |     |   |      |    |   |     |      |    |      |      |    |    |   |    |   |    |     |    |    |   |   |   |   |   |   |   |   |   |   |   |   |   |   |   |
| SARS-CoV-2 Reference Genome NC_045512.2              | (17280)  | GAA          | -----          | TTCAA       | CATTAGAA            | CAGTATGTCTTTTGTACTGTAAATGCATTGCC | TGAGACG         | ACAGCAGAT   | TAT-A       |                 |           |           |           |     |   |      |    |   |     |      |    |      |      |    |    |   |    |   |    |     |    |    |   |   |   |   |   |   |   |   |   |   |   |   |   |   |   |
| Section 2006                                         |          |              |                |             |                     |                                  |                 |             |             |                 |           |           |           |     |   |      |    |   |     |      |    |      |      |    |    |   |    |   |    |     |    |    |   |   |   |   |   |   |   |   |   |   |   |   |   |   |   |
|                                                      | (154386) | 154386       | 154396         | 154407      | 154418              | 154429                           | 154440          | 154451      | 154462      |                 |           |           |           |     |   |      |    |   |     |      |    |      |      |    |    |   |    |   |    |     |    |    |   |   |   |   |   |   |   |   |   |   |   |   |   |   |   |
| Candidatus Carsonella ruddii strain BT chromosome... | (154072) | TTTTTCTT     | TATTTATGTTATTT | AAATAAA     | -ATAAAATCTATTTTAAAT | -TTACCAATAACAG                   | TAGATAATATATTAC | C           |             |                 |           |           |           |     |   |      |    |   |     |      |    |      |      |    |    |   |    |   |    |     |    |    |   |   |   |   |   |   |   |   |   |   |   |   |   |   |   |
| Candidatus Carsonella 135557 - 167442nt              | (18516)  | TTTTTCTT     | TATTTATGTTATTT | AAATAAA     | -ATAAAATCTATTTTAAAT | -TTACCAATAACAG                   | TAGATAATATATTAC | C           |             |                 |           |           |           |     |   |      |    |   |     |      |    |      |      |    |    |   |    |   |    |     |    |    |   |   |   |   |   |   |   |   |   |   |   |   |   |   |   |
| SARS-CoV-2 Reference Genome NC_045512.2              | (17347)  | GTTGTCT      | --TTGATG       | AAATTTCAAT  | GGCCACAAAT          | TATGATTTGAGTGT                   | TTGTCAATGC      | CAG         | -----ATTACG |                 |           |           |           |     |   |      |    |   |     |      |    |      |      |    |    |   |    |   |    |     |    |    |   |   |   |   |   |   |   |   |   |   |   |   |   |   |   |
| Section 2007                                         |          |              |                |             |                     |                                  |                 |             |             |                 |           |           |           |     |   |      |    |   |     |      |    |      |      |    |    |   |    |   |    |     |    |    |   |   |   |   |   |   |   |   |   |   |   |   |   |   |   |
|                                                      | (154463) | 154463       | 154473         | 154484      | 154495              | 154506                           | 154517          | 154528      | 154539      |                 |           |           |           |     |   |      |    |   |     |      |    |      |      |    |    |   |    |   |    |     |    |    |   |   |   |   |   |   |   |   |   |   |   |   |   |   |   |
| Candidatus Carsonella ruddii strain BT chromosome... | (154147) | TAAATAAAT    | TATTAATTCAATT  | TAAATATATTA | TACAAAAACATAAAT     | TTAATTC                          | TGTTTTATCTG     | -CTCATAT    | -ACATAA     |                 |           |           |           |     |   |      |    |   |     |      |    |      |      |    |    |   |    |   |    |     |    |    |   |   |   |   |   |   |   |   |   |   |   |   |   |   |   |
| Candidatus Carsonella 135557 - 167442nt              | (18591)  | TAAATAAAT    | TATTAATTCAATT  | TAAATATATTA | TACAAAAACATAAAT     | TTAATTC                          | TGTTTTATCTG     | -CTCATAT    | -ACATAA     |                 |           |           |           |     |   |      |    |   |     |      |    |      |      |    |    |   |    |   |    |     |    |    |   |   |   |   |   |   |   |   |   |   |   |   |   |   |   |
| SARS-CoV-2 Reference Genome NC_045512.2              | (17412)  | TGCTAA       | GCACTAT        | TGTGTACATT  | GGCGACCC            | TGCTCAA                          | T-TACC          | TGCACCA     | CGCACAT     | TGCTAACT        | AGGGCACA  | CTA       |           |     |   |      |    |   |     |      |    |      |      |    |    |   |    |   |    |     |    |    |   |   |   |   |   |   |   |   |   |   |   |   |   |   |   |
| Section 2008                                         |          |              |                |             |                     |                                  |                 |             |             |                 |           |           |           |     |   |      |    |   |     |      |    |      |      |    |    |   |    |   |    |     |    |    |   |   |   |   |   |   |   |   |   |   |   |   |   |   |   |
|                                                      | (154540) | 154540       | 154550         | 154561      | 154572              | 154583                           | 154594          | 154605      | 154616      |                 |           |           |           |     |   |      |    |   |     |      |    |      |      |    |    |   |    |   |    |     |    |    |   |   |   |   |   |   |   |   |   |   |   |   |   |   |   |
| Candidatus Carsonella ruddii strain BT chromosome... | (154222) | TGATAT       | GGGTAAT        | GCAATT      | TCTAATTCAATT        | TTATCATTAT                       | TATCTAGT        | ATAAAAAGAAT | TAGAAGGGA   | ACTATTT         | --        |           |           |     |   |      |    |   |     |      |    |      |      |    |    |   |    |   |    |     |    |    |   |   |   |   |   |   |   |   |   |   |   |   |   |   |   |
| Candidatus Carsonella 135557 - 167442nt              | (18666)  | TGATAT       | GGGTAAT        | GCAATT      | TCTAATTCAATT        | TTATCATTAT                       | TATCTAGT        | ATAAAAAGAAT | TAGAAGGGA   | ACTATTT         | --        |           |           |     |   |      |    |   |     |      |    |      |      |    |    |   |    |   |    |     |    |    |   |   |   |   |   |   |   |   |   |   |   |   |   |   |   |
| SARS-CoV-2 Reference Genome NC_045512.2              | (17488)  | GAA          | CCAGAA         | TATTTCAATT  | CAGTGTGT            | AGAC                             | TTATG           | AAAAC       | TATAG       | -GTCCAG         | ACATGT    | TCCCTCGGA | ACTGTCGGC |     |   |      |    |   |     |      |    |      |      |    |    |   |    |   |    |     |    |    |   |   |   |   |   |   |   |   |   |   |   |   |   |   |   |
| Section 2009                                         |          |              |                |             |                     |                                  |                 |             |             |                 |           |           |           |     |   |      |    |   |     |      |    |      |      |    |    |   |    |   |    |     |    |    |   |   |   |   |   |   |   |   |   |   |   |   |   |   |   |
|                                                      | (154617) | 154617       | 154627         | 154638      | 154649              | 154660                           | 154671          | 154682      | 154693      |                 |           |           |           |     |   |      |    |   |     |      |    |      |      |    |    |   |    |   |    |     |    |    |   |   |   |   |   |   |   |   |   |   |   |   |   |   |   |
| Candidatus Carsonella ruddii strain BT chromosome... | (154297) | -TGGT        | AATG           | GAGAAA      | GAGCAG              | GTAATGC                          | -ATCATT         | TATTAATTAT  | AGCTTTAAAT  | TTATATAATTTAGGT | ATTAAATCC |           |           |     |   |      |    |   |     |      |    |      |      |    |    |   |    |   |    |     |    |    |   |   |   |   |   |   |   |   |   |   |   |   |   |   |   |
| Candidatus Carsonella 135557 - 167442nt              | (18741)  | -TGGT        | AATG           | GAGAAA      | GAGCAG              | GTAATGC                          | -ATCATT         | TATTAATTAT  | AGCTTTAAAT  | TTATATAATTTAGGT | ATTAAATCC |           |           |     |   |      |    |   |     |      |    |      |      |    |    |   |    |   |    |     |    |    |   |   |   |   |   |   |   |   |   |   |   |   |   |   |   |
| SARS-CoV-2 Reference Genome NC_045512.2              | (17564)  | G            | TGTCC          | TGCT        | GAAATTG             | TTGACACTG                        | TGAGTGC         | TTTGGT      | TTATGATAA   | TAAAGC          | TTAAGCA   | TAAGACA   | AATC-     |     |   |      |    |   |     |      |    |      |      |    |    |   |    |   |    |     |    |    |   |   |   |   |   |   |   |   |   |   |   |   |   |   |   |
| Section 2010                                         |          |              |                |             |                     |                                  |                 |             |             |                 |           |           |           |     |   |      |    |   |     |      |    |      |      |    |    |   |    |   |    |     |    |    |   |   |   |   |   |   |   |   |   |   |   |   |   |   |   |
|                                                      | (154694) | 154694       | 154704         | 154715      | 154726              | 154737                           | 154748          | 154759      | 154770      |                 |           |           |           |     |   |      |    |   |     |      |    |      |      |    |    |   |    |   |    |     |    |    |   |   |   |   |   |   |   |   |   |   |   |   |   |   |   |
| Candidatus Carsonella ruddii strain BT chromosome... | (154372) | TAA          | AAT            | T           | AAT                 | ATTTT                            | C               | A           | A           | C               | A         | A         | TTTAT     | T   | A | A    | AT | T | TTT | TT   | -  | C    | A    | A  | T  | G | A  | A | A  | A   | T  | C  | T | T | A | A | A | T | A | G | A | T | A | C | C | - |   |
| Candidatus Carsonella 135557 - 167442nt              | (18816)  | TAA          | AAT            | T           | AAT                 | ATTTT                            | C               | A           | A           | C               | A         | A         | TTTAT     | T   | A | A    | AT | T | TTT | TT   | -  | C    | A    | A  | T  | G | A  | A | A  | A   | A  | T  | C | T | T | A | A | A | T | A | G | A | T | A | C | C | - |
| SARS-CoV-2 Reference Genome NC_045512.2              | (17640)  | --           | AGC            | T           | CAAT                | GC                               | TTT             | --          | AAA         | T               | GT        | TTTAT     | AA        | GGG | T | TTAT | CA | C | GC  | ATGA | TG | TTTC | ATCT | GC | AA | T | AA | C | AG | GCC | AC | AA |   |   |   |   |   |   |   |   |   |   |   |   |   |   |   |

SARS-CoV-2 & Bakterien.apr

|                                                      |          |          | Section 2011                                                                          |        |        |        |        |        |        |        |
|------------------------------------------------------|----------|----------|---------------------------------------------------------------------------------------|--------|--------|--------|--------|--------|--------|--------|
|                                                      |          |          | 154771                                                                                | 154781 | 154792 | 154803 | 154814 | 154825 | 154836 | 154847 |
| Candidatus Carsonella ruddii strain BT chromosome... | (154771) | (154447) | -TTGGTTTAGTAGATTGAATTATT--CTGCTTTTCTGGTAGTCATCAAGATGCTATTTTAAATCATATTTTAAAA           |        |        |        |        |        |        |        |
| Candidatus Carsonella 135557 - 167442nt              | (18891)  |          | -TTGGTTTAGTAGATTGAATTATT--CTGCTTTTCTGGTAGTCATCAAGATGCTATTTTAAATCATATTTTAAAA           |        |        |        |        |        |        |        |
| SARS-CoV-2 Reference Genome NC_045512.2              | (17713)  |          | ATAGGCGTGTA-AGA GAATTCCCTTACACGTAAACCCTGCTTG GAGAAAGCTGTCTTTATTTCACCTTATTAATTCAC      |        |        |        |        |        |        |        |
|                                                      |          |          | Section 2012                                                                          |        |        |        |        |        |        |        |
|                                                      |          |          | 154848                                                                                | 154858 | 154869 | 154880 | 154891 | 154902 | 154913 | 154924 |
| Candidatus Carsonella ruddii strain BT chromosome... | (154848) | (154521) | AAAAATTTT TTTTATGGAAAGTATTATATATACCAA TAAATCCTAAAATTTTTCATTTTCTCATAAAAATATAATA        |        |        |        |        |        |        |        |
| Candidatus Carsonella 135557 - 167442nt              | (18965)  |          | AAAAATTTT TTTTATGGAAAGTATTATATATACCAA TAAATCCTAAAATTTTTCATTTTCTCATAAAAATATAATA        |        |        |        |        |        |        |        |
| SARS-CoV-2 Reference Genome NC_045512.2              | (17789)  |          | AGAA TGC TGTAGCC TCAAA GATTTTGGGAC TACCAA-----CTCAAACTGTTGATT CATCA CAGGGCTC-AGAATA   |        |        |        |        |        |        |        |
|                                                      |          |          | Section 2013                                                                          |        |        |        |        |        |        |        |
|                                                      |          |          | 154925                                                                                | 154935 | 154946 | 154957 | 154968 | 154979 | 154990 | 155001 |
| Candidatus Carsonella ruddii strain BT chromosome... | (154925) | (154598) | AAAATAAATTCTCAATCAGGAAAAGGAGGTTTAAAAATTATTTTTGTGTAATAATTATAATTTATTGTTAAATAAATTT       |        |        |        |        |        |        |        |
| Candidatus Carsonella 135557 - 167442nt              | (19042)  |          | AAAATAAATTCTCAATCAGGAAAAGGAGGTTTAAAAATTATTTTTGTGTAATAATTATAATTTATTGTTAAATAAATTT       |        |        |        |        |        |        |        |
| SARS-CoV-2 Reference Genome NC_045512.2              | (17859)  |          | TGAC TATGT-CATATTCACCTC AAA CCA C-TGAACA GCTC ACTCTTG ---TAATGTAAACAGATT-----TAATGT   |        |        |        |        |        |        |        |
|                                                      |          |          | Section 2014                                                                          |        |        |        |        |        |        |        |
|                                                      |          |          | 155002                                                                                | 155012 | 155023 | 155034 | 155045 | 155056 | 155067 | 155078 |
| Candidatus Carsonella ruddii strain BT chromosome... | (155002) | (154675) | TATTTTATATAAAAAATATATAATATTATTCAAGATTTATCTGAAATTTTAATGTGTGAAATTTATAAAGAAATGATAT       |        |        |        |        |        |        |        |
| Candidatus Carsonella 135557 - 167442nt              | (19119)  |          | TATTTTATATAAAAAATATATAATATTATTCAAGATTTATCTGAAATTTTAATGTGTGAAATTTATAAAGAAATGATAT       |        |        |        |        |        |        |        |
| SARS-CoV-2 Reference Genome NC_045512.2              | (17925)  |          | TGCTATTA CCA GA----GC AAAAGT A GGCAT-AC TTTG CATAA TGTCTGATA-GAGACC TTTATGACAGT TGCAT |        |        |        |        |        |        |        |
|                                                      |          |          | Section 2015                                                                          |        |        |        |        |        |        |        |
|                                                      |          |          | 155079                                                                                | 155089 | 155100 | 155111 | 155122 | 155133 | 155144 | 155155 |
| Candidatus Carsonella ruddii strain BT chromosome... | (155079) | (154752) | TTTCTATATTTTATTTAAGATCAATAAATAT---AATTTTAAAAAAATTAAAA TAATAAATTTTATTATTCTTTT          |        |        |        |        |        |        |        |
| Candidatus Carsonella 135557 - 167442nt              | (19196)  |          | TTTCTATATTTTATTTAAGATCAATAAATAT---AATTTTAAAAAAATTAAAA TAATAAATTTTATTATTCTTTT          |        |        |        |        |        |        |        |
| SARS-CoV-2 Reference Genome NC_045512.2              | (17996)  |          | TTACAAGTCTTGA AATTCACGTAGGAATGTGGCAAC TTTACAA GCTGAAATGTAA CAGGAC TCTTTAAGATTGT       |        |        |        |        |        |        |        |
|                                                      |          |          | Section 2016                                                                          |        |        |        |        |        |        |        |
|                                                      |          |          | 155156                                                                                | 155166 | 155177 | 155188 | 155199 | 155210 | 155221 | 155232 |
| Candidatus Carsonella ruddii strain BT chromosome... | (155156) | (154826) | ATTTTCAATTTTAAAATTATCGTTTTAATAATAAAAAAAACAAAAAAATAATATAAATTAAAAA                      |        |        |        |        |        |        |        |
| Candidatus Carsonella 135557 - 167442nt              | (19270)  |          | ATTTTCAATTTTAAAATTATCGTTTTAATAATAAAAAAAACAAAAAAATAATATAAATTAAAAA                      |        |        |        |        |        |        |        |
| SARS-CoV-2 Reference Genome NC_045512.2              | (18073)  |          | AGT---AAGGT--AA TCAC TGGGTTACATCC TACACA GGCACCTACAC CCTCAGTGTGAC-AC TA AATTCAAAA C   |        |        |        |        |        |        |        |



## SARS-CoV-2 &amp; Bakterien.apr

| Section 2017                                         |          |        |        |          |        |        |         |        |              |
|------------------------------------------------------|----------|--------|--------|----------|--------|--------|---------|--------|--------------|
|                                                      | (155233) | 155233 | 155243 | 155254   | 155265 | 155276 | 155287  | 155298 | 155309       |
| Candidatus Carsonella ruddii strain BT chromosome... | (154903) | TGAA   | TAAT   | ACTT     | TATG   | GAGAA  | ATAAT   | TAAAT  | TTTCTACTTTTG |
| Candidatus Carsonella 135557 - 167442nt              | (19347)  | TGAA   | TAAT   | ACTT     | TATG   | GAGAA  | ATAAT   | TAAAT  | TTTCTACTTTTG |
| SARS-CoV-2 Reference Genome NC_045512.2              | (18144)  | TGAA   | GGT    | TATG     | TG     | TTGA   | CATACC  | TGGCAT | ACCTAAGGACAT |
|                                                      |          |        |        |          |        |        |         |        |              |
|                                                      | (155310) | 155310 | 155320 | 155331   | 155342 | 155353 | 155364  | 155375 | 155386       |
| Candidatus Carsonella ruddii strain BT chromosome... | (154979) | AGAT   | TGGT   | TATTT    | TCACAA | TAAAT  | TATTTTT | TGAAAA | AAACAAT      |
| Candidatus Carsonella 135557 - 167442nt              | (19423)  | AGAT   | TGGT   | TATTT    | TCACAA | TAAAT  | TATTTTT | TGAAAA | AAACAAT      |
| SARS-CoV-2 Reference Genome NC_045512.2              | (18220)  | AAAAT  | GATGA  | ATTAT    | CAAGT  | TAA    | TGGT    | TACCC  | TAA          |
|                                                      |          |        |        |          |        |        |         |        |              |
|                                                      | (155387) | 155387 | 155397 | 155408   | 155419 | 155430 | 155441  | 155452 | 155463       |
| Candidatus Carsonella ruddii strain BT chromosome... | (155056) | CT     | TTATTT | TCACACAA | AGAAAA | GAAT   | TAGAT   | TAAAGT | AAAAAT       |
| Candidatus Carsonella 135557 - 167442nt              | (19500)  | CT     | TTATTT | TCACACAA | AGAAAA | GAAT   | TAGAT   | TAAAGT | AAAAAT       |
| SARS-CoV-2 Reference Genome NC_045512.2              | (18296)  | GGAT   | TTGGC  | TCGAT    | GTGTCG | AGGGGT | GTCA    | TGCT   | AGT          |
|                                                      |          |        |        |          |        |        |         |        |              |
|                                                      | (155464) | 155464 | 155474 | 155485   | 155496 | 155507 | 155518  | 155529 | 155540       |
| Candidatus Carsonella ruddii strain BT chromosome... | (155132) | ATGT   | CCGAT  | ATTAAT   | GTAA   | TAAAAA | ATCAT   | GTATAA | TAAAAAGTT    |
| Candidatus Carsonella 135557 - 167442nt              | (19576)  | ATGT   | CCGAT  | ATTAAT   | GTAA   | TAAAAA | ATCAT   | GTATAA | TAAAAAGTT    |
| SARS-CoV-2 Reference Genome NC_045512.2              | (18369)  | TTT    | TCTAC  | AG--     | GTGT   | TAA    | CCTAGT  | TGCT   | TG           |
|                                                      |          |        |        |          |        |        |         |        |              |
|                                                      | (155541) | 155541 | 155551 | 155562   | 155573 | 155584 | 155595  | 155606 | 155617       |
| Candidatus Carsonella ruddii strain BT chromosome... | (155209) | CAG    | GACAT  | TGCT     | GATTT  | AAC    | -----   | ATAT   | CAATT        |
| Candidatus Carsonella 135557 - 167442nt              | (19653)  | CAG    | GACAT  | TGCT     | GATTT  | AAC    | -----   | ATAT   | CAATT        |
| SARS-CoV-2 Reference Genome NC_045512.2              | (18443)  | GAG    | TTAG   | TGCT     | AA     | ACCA   | AC      | GCCT   | TGG          |
|                                                      |          |        |        |          |        |        |         |        |              |
|                                                      | (155618) | 155618 | 155628 | 155639   | 155650 | 155661 | 155672  | 155683 | 155694       |
| Candidatus Carsonella ruddii strain BT chromosome... | (155275) | CTAG   | TGCT   | AGAG     | AAAC   | CGCT   | TGTAG   | AGTT   | TGCT         |
| Candidatus Carsonella 135557 - 167442nt              | (19719)  | CTAG   | TGCT   | AGAG     | AAAC   | CGCT   | TGTAG   | AGTT   | TGCT         |
| SARS-CoV-2 Reference Genome NC_045512.2              | (18520)  | G      | TAG    | TGCT     | GT     | AT     | AAAA    | --     | GATT         |

## SARS-CoV-2 &amp; Bakterien.apr

|                                                      |          |                                                                                |        |        |        |        |        |        |        |        |  |
|------------------------------------------------------|----------|--------------------------------------------------------------------------------|--------|--------|--------|--------|--------|--------|--------|--------|--|
|                                                      |          | Section 2023                                                                   |        |        |        |        |        |        |        |        |  |
|                                                      |          | (155695)                                                                       | 155695 | 155705 | 155716 | 155727 | 155738 | 155749 | 155760 | 155771 |  |
| Candidatus Carsonella ruddii strain BT chromosome... | (155351) | AATAAGATCATATATAAAAAAATTTGGATTTTTAAAAATTAATTTTATTATTGGAAAAATATTATAAATAGATTTT   |        |        |        |        |        |        |        |        |  |
| Candidatus Carsonella 135557 - 167442nt              | (19795)  | AATAAGATCATATATAAAAAAATTTGGATTTTTAAAAATTAATTTTATTATTGGAAAAATATTATAAATAGATTTT   |        |        |        |        |        |        |        |        |  |
| SARS-CoV-2 Reference Genome NC_045512.2              | (18591)  | CTATATGGGCACATGGCTTTGAG--TTGACATCTATGAAATTTTGTGAAAATAGGACCTGAGCGCACTGTTGTCT    |        |        |        |        |        |        |        |        |  |
|                                                      |          | Section 2024                                                                   |        |        |        |        |        |        |        |        |  |
|                                                      |          | (155772)                                                                       | 155772 | 155782 | 155793 | 155804 | 155815 | 155826 | 155837 | 155848 |  |
| Candidatus Carsonella ruddii strain BT chromosome... | (155428) | TTGTAA-ATATTT-----ATTATATTAAAGAATTAAAAGAATATATTAATAATTTCAAAAATTCAA-GTAACTCATC  |        |        |        |        |        |        |        |        |  |
| Candidatus Carsonella 135557 - 167442nt              | (19872)  | TTGTAA-ATATTT-----ATTATATTAAAGAATTAAAAGAATATATTAATAATTTCAAAAATTCAA-GTAACTCATC  |        |        |        |        |        |        |        |        |  |
| SARS-CoV-2 Reference Genome NC_045512.2              | (18666)  | ATGTGATAGACGTGCCACATGCTTTTCCACTGCTTCAGACACTTATGCCCTGTGGCATCATTTCTATTGGATTGATT  |        |        |        |        |        |        |        |        |  |
|                                                      |          | Section 2025                                                                   |        |        |        |        |        |        |        |        |  |
|                                                      |          | (155849)                                                                       | 155849 | 155859 | 155870 | 155881 | 155892 | 155903 | 155914 | 155925 |  |
| Candidatus Carsonella ruddii strain BT chromosome... | (155498) | AAGTGCAGAAATAATAACAATAATTAATGGAATCAAAATGGTTTAGGTGATCCATTATATAAAAAAATTGATTCTA   |        |        |        |        |        |        |        |        |  |
| Candidatus Carsonella 135557 - 167442nt              | (19942)  | AAGTGCAGAAATAATAACAATAATTAATGGAATCAAAATGGTTTAGGTGATCCATTATATAAAAAAATTGATTCTA   |        |        |        |        |        |        |        |        |  |
| SARS-CoV-2 Reference Genome NC_045512.2              | (18743)  | ACGTCTATAATCCGTTT--ATGATTGATGTTCAACAAATGGGGTTTACAGGTAACTTACAAAGCAACCAATGATCTG  |        |        |        |        |        |        |        |        |  |
|                                                      |          | Section 2026                                                                   |        |        |        |        |        |        |        |        |  |
|                                                      |          | (155926)                                                                       | 155926 | 155936 | 155947 | 155958 | 155969 | 155980 | 155991 | 156002 |  |
| Candidatus Carsonella ruddii strain BT chromosome... | (155575) | TTATTTCTGATTATATTTTAAAGTATTAATGCTGTAAAAAGTATTTTGGAAATTAATTTTAAAAAATAAAAAATTCT  |        |        |        |        |        |        |        |        |  |
| Candidatus Carsonella 135557 - 167442nt              | (20019)  | TTATTTCTGATTATATTTTAAAGTATTAATGCTGTAAAAAGTATTTTGGAAATTAATTTTAAAAAATAAAAAATTCT  |        |        |        |        |        |        |        |        |  |
| SARS-CoV-2 Reference Genome NC_045512.2              | (18817)  | T-ATTGTCAAGTCCATGGTAA-TGCACATGTAGCTAGTTGTGATGCAATCATGACTAGGTGTCTAGCTGTCCACGAG  |        |        |        |        |        |        |        |        |  |
|                                                      |          | Section 2027                                                                   |        |        |        |        |        |        |        |        |  |
|                                                      |          | (156003)                                                                       | 156003 | 156013 | 156024 | 156035 | 156046 | 156057 | 156068 | 156079 |  |
| Candidatus Carsonella ruddii strain BT chromosome... | (155652) | TACAATATAAAAGATGAA-ATTTCAAAATTTGGTTTTTATCAAATAATAAT--AGTGAATTTTAGGTGGTAT-TA    |        |        |        |        |        |        |        |        |  |
| Candidatus Carsonella 135557 - 167442nt              | (20096)  | TACAATATAAAAGATGAA-ATTTCAAAATTTGGTTTTTATCAAATAATAAT--AGTGAATTTTAGGTGGTAT-TA    |        |        |        |        |        |        |        |        |  |
| SARS-CoV-2 Reference Genome NC_045512.2              | (18892)  | TGGTTTGTAAAGCGTGTGACTGGACTATTGAATATCCATAT-AAATGGTGATGAAGTGAAGATTAAATGCGGCTGTAT |        |        |        |        |        |        |        |        |  |
|                                                      |          | Section 2028                                                                   |        |        |        |        |        |        |        |        |  |
|                                                      |          | (156080)                                                                       | 156080 | 156090 | 156101 | 156112 | 156123 | 156134 | 156145 | 156156 |  |
| Candidatus Carsonella ruddii strain BT chromosome... | (155725) | CCAATGGTCAACCAATAATATTAAAA-----ATTGTTTTTAAACCTACTTCTAGCACTTCAAAAAAATAAAAAACAA  |        |        |        |        |        |        |        |        |  |
| Candidatus Carsonella 135557 - 167442nt              | (20169)  | CCAATGGTCAACCAATAATATTAAAA-----ATTGTTTTTAAACCTACTTCTAGCACTTCAAAAAAATAAAAAACAA  |        |        |        |        |        |        |        |        |  |
| SARS-CoV-2 Reference Genome NC_045512.2              | (18968)  | GAAAGGTTCACACATGGTTGTTAAAGCTGCAATTATTAGCAGACAAATTCAGTTCTTCAAGACAT-TGGTAACCC    |        |        |        |        |        |        |        |        |  |

SARS-CoV-2 & Bakterien.apr

|                                                      |          |  | Section 2029                       |                                    |                              |                        |                 |        |        |        |
|------------------------------------------------------|----------|--|------------------------------------|------------------------------------|------------------------------|------------------------|-----------------|--------|--------|--------|
|                                                      |          |  | 156157                             | 156167                             | 156178                       | 156189                 | 156200          | 156211 | 156222 | 156233 |
| Candidatus Carsonella ruddii strain BT chromosome... | (156157) |  | TAAATCAAGATAATAAAGAAATAATTTCAAA    | AAACTTATGGAAGACATGATCCATG          | -TGTTG                       | -GTTTAAGAGCAATAC       |                 |        |        |        |
| Candidatus Carsonella 135557 - 167442nt              | (155797) |  | TAAATCAAGATAATAAAGAAATAATTTCAAA    | AAACTTATGGAAGACATGATCCATG          | -TGTTG                       | -GTTTAAGAGCAATAC       |                 |        |        |        |
| SARS-CoV-2 Reference Genome NC_045512.2              | (20241)  |  | TAAAGCTA--TT--AAGTGTGTACC          | TCAAGCTGATGTA                      | GAA                          | TGGAGTTCTATGATGCACAG   | CCCTGTGTAGTGACA |        |        |        |
|                                                      | (19044)  |  |                                    |                                    |                              |                        |                 |        |        |        |
|                                                      |          |  | Section 2030                       |                                    |                              |                        |                 |        |        |        |
|                                                      |          |  | 156234                             | 156244                             | 156255                       | 156266                 | 156277          | 156288 | 156299 | 156310 |
| Candidatus Carsonella ruddii strain BT chromosome... | (156234) |  | CAATAATAGAATCAATGATTTCTACTATTTTAA  | TAATAAAATAAAATTTTAAATAAATAAAATTTAT | GACTAATACTTTATA              |                        |                 |        |        |        |
| Candidatus Carsonella 135557 - 167442nt              | (155872) |  | CAATAATAGAATCAATGATTTCTACTATTTTAA  | TAATAAAATAAAATTTTAAATAAATAAAATTTAT | GACTAATACTTTATA              |                        |                 |        |        |        |
| SARS-CoV-2 Reference Genome NC_045512.2              | (20316)  |  | AGCTTATAAATAGAGATTATTCTATTCTTAT    | GCCACACATTCTGACAAAT                | -----T                       | CACAGATGGTGT           |                 |        |        |        |
|                                                      | (19116)  |  |                                    |                                    |                              |                        |                 |        |        |        |
|                                                      |          |  | Section 2031                       |                                    |                              |                        |                 |        |        |        |
|                                                      |          |  | 156311                             | 156321                             | 156332                       | 156343                 | 156354          | 156365 | 156376 | 156387 |
| Candidatus Carsonella ruddii strain BT chromosome... | (156311) |  | TGACAATATAATAAATAATCATATTGTTAATA   | TTTATGATGATTTATATCTTTTATATATAGATA  | AAAATTTTATTAC                |                        |                 |        |        |        |
| Candidatus Carsonella 135557 - 167442nt              | (155949) |  | TGACAATATAATAAATAATCATATTGTTAATA   | TTTATGATGATTTATATCTTTTATATATAGATA  | AAAATTTTATTAC                |                        |                 |        |        |        |
| SARS-CoV-2 Reference Genome NC_045512.2              | (20393)  |  | TGCCATTATTGGAAATG----              | CAATGTCGATAGATAT                   | CCTGCT--AATTC                | CAATGTTGTGTAGAT        | -----TTG        | CACT   |        |        |
|                                                      | (19183)  |  |                                    |                                    |                              |                        |                 |        |        |        |
|                                                      |          |  | Section 2032                       |                                    |                              |                        |                 |        |        |        |
|                                                      |          |  | 156388                             | 156398                             | 156409                       | 156420                 | 156431          | 156442 | 156453 | 156464 |
| Candidatus Carsonella ruddii strain BT chromosome... | (156388) |  | ATGAAGTTACATCACCACAAGCTTTTAAATTTAT | TAATAAATAAATAAATTTATTTGGAATAAAGT   | ATTTTAT----                  | C                      |                 |        |        |        |
| Candidatus Carsonella 135557 - 167442nt              | (156026) |  | ATGAAGTTACATCACCACAAGCTTTTAAATTTAT | TAATAAATAAATAAATTTATTTGGAATAAAGT   | ATTTTAT----                  | C                      |                 |        |        |        |
| SARS-CoV-2 Reference Genome NC_045512.2              | (20470)  |  | AGAGTGCTATCTAACCTTAACTTGCCCTGGTTG  | TGATGGTGGCAGTTTGTATGTAAATAA        | CAATGCATTCCACACAC            |                        |                 |        |        |        |
|                                                      | (19249)  |  |                                    |                                    |                              |                        |                 |        |        |        |
|                                                      |          |  | Section 2033                       |                                    |                              |                        |                 |        |        |        |
|                                                      |          |  | 156465                             | 156475                             | 156486                       | 156497                 | 156508          | 156519 | 156530 | 156541 |
| Candidatus Carsonella ruddii strain BT chromosome... | (156465) |  | AACATCTGATCATAATGTATCAACTGATAAAAA  | CAAAGATTTT-----                    | TAATAAAAAAATAAAACAATTAAATTGT |                        |                 |        |        |        |
| Candidatus Carsonella 135557 - 167442nt              | (156099) |  | AACATCTGATCATAATGTATCAACTGATAAAAA  | CAAAGATTTT-----                    | TAATAAAAAAATAAAACAATTAAATTGT |                        |                 |        |        |        |
| SARS-CoV-2 Reference Genome NC_045512.2              | (20543)  |  | AGCTTTTGATAAAGTGCTTTTGT            | TAAATTTAAACAA                      | TTACCA                       | TTTTTCTATTACTCTGACAGTC | CATGTGAGTCTC    |        |        |        |
|                                                      | (19326)  |  |                                    |                                    |                              |                        |                 |        |        |        |
|                                                      |          |  | Section 2034                       |                                    |                              |                        |                 |        |        |        |
|                                                      |          |  | 156542                             | 156552                             | 156563                       | 156574                 | 156585          | 156596 | 156607 | 156618 |
| Candidatus Carsonella ruddii strain BT chromosome... | (156542) |  | ATAAAAAAATAAAGAAAAATATTTTTTTAA     | TATTATGATTTAAATAATCTAAACAAGGTATA   | AATACATATTA                  |                        |                 |        |        |        |
| Candidatus Carsonella 135557 - 167442nt              | (156175) |  | ATAAAAAAATAAAGAAAAATATTTTTTTAA     | TATTATGATTTAAATAATCTAAACAAGGTATA   | AATACATATTA                  |                        |                 |        |        |        |
| SARS-CoV-2 Reference Genome NC_045512.2              | (20619)  |  | ATGGAAACAAAGTAGTGTCTAGATAT-----    | AGATTATGTACCACTAA                  | GTCTGCTACGTGTATA             | ACAGTTGCA              |                 |        |        |        |
|                                                      | (19403)  |  |                                    |                                    |                              |                        |                 |        |        |        |

## SARS-CoV-2 &amp; Bakterien.apr

|                                                      |          | Section 2035                                                                    |                                                      |                  |               |        |        |        |        |  |  |
|------------------------------------------------------|----------|---------------------------------------------------------------------------------|------------------------------------------------------|------------------|---------------|--------|--------|--------|--------|--|--|
|                                                      | (156619) | 156619                                                                          | 156629                                               | 156640           | 156651        | 156662 | 156673 | 156684 | 156695 |  |  |
| Candidatus Carsonella ruddii strain BT chromosome... | (156251) | TAGCAACAGAATCTATGTTTTTATTTCAGGTA                                                | TGATTACAGTTTGTGGTGATTCTCATACAACAACAAATGGAAG          |                  |               |        |        |        |        |  |  |
| Candidatus Carsonella 135557 - 167442nt              | (20695)  | TAGCAACAGAATCTATGTTTTTATTTCAGGTA                                                | TGATTACAGTTTGTGGTGATTCTCATACAACAACAAATGGAAG          |                  |               |        |        |        |        |  |  |
| SARS-CoV-2 Reference Genome NC_045512.2              | (19472)  | ATTTAGGTGGTGCTGTCTGTAGACATCCTATGCTAATGAGTACAGATTGTATCTCGATGCTTATAACAT           | -----G                                               |                  |               |        |        |        |        |  |  |
|                                                      |          | Section 2036                                                                    |                                                      |                  |               |        |        |        |        |  |  |
|                                                      | (156696) | 156696                                                                          | 156706                                               | 156717           | 156728        | 156739 | 156750 | 156761 | 156772 |  |  |
| Candidatus Carsonella ruddii strain BT chromosome... | (156327) | TTTATCATTATTAGCTATTGGTATTGGTACTTCAGATTTAAACATAGTTTATATCTACTCAA                  | -----TGTATAATACA                                     |                  |               |        |        |        |        |  |  |
| Candidatus Carsonella 135557 - 167442nt              | (20771)  | TTTATCATTATTAGCTATTGGTATTGGTACTTCAGATTTAAACATAGTTTATATCTACTCAA                  | -----TGTATAATACA                                     |                  |               |        |        |        |        |  |  |
| SARS-CoV-2 Reference Genome NC_045512.2              | (19540)  | ATGATCTCAGCTGGCTTTAGCTTGTGGGTTTACAACAATTTGATACCTTATACCTCTGGACACTTTTACAAAGACT    |                                                      |                  |               |        |        |        |        |  |  |
|                                                      |          | Section 2037                                                                    |                                                      |                  |               |        |        |        |        |  |  |
|                                                      | (156773) | 156773                                                                          | 156783                                               | 156794           | 156805        | 156816 | 156827 | 156838 | 156849 |  |  |
| Candidatus Carsonella ruddii strain BT chromosome... | (156399) | AAAAAAATTAATAAATATGAATATTTTATTATATAAATAAAATTAATAAAATATTTCAAAGATTAA              | TACTA                                                | ---              |               |        |        |        |        |  |  |
| Candidatus Carsonella 135557 - 167442nt              | (20843)  | AAAAAAATTAATAAATATGAATATTTTATTATATAAATAAAATTAATAAAATATTTCAAAGATTAA              | TACTA                                                | ---              |               |        |        |        |        |  |  |
| SARS-CoV-2 Reference Genome NC_045512.2              | (19617)  | TCAGAGTTTGAAGAAATGTGGCT                                                         | TTTAAATGTGTAAATAAAGGACACTTGTATGGAACAAGGGTGAAGTACAGTT |                  |               |        |        |        |        |  |  |
|                                                      |          | Section 2038                                                                    |                                                      |                  |               |        |        |        |        |  |  |
|                                                      | (156850) | 156850                                                                          | 156860                                               | 156871           | 156882        | 156893 | 156904 | 156915 | 156926 |  |  |
| Candidatus Carsonella ruddii strain BT chromosome... | (156472) | TATATAATAAAAAAATTTCTTCAAAAGGTGGTACAGGATATTGTATTGAATTAGTGGAATTTGTATTGAAAACCTT    |                                                      |                  |               |        |        |        |        |  |  |
| Candidatus Carsonella 135557 - 167442nt              | (20916)  | TATATAATAAAAAAATTTCTTCAAAAGGTGGTACAGGATATTGTATTGAATTAGTGGAATTTGTATTGAAAACCTT    |                                                      |                  |               |        |        |        |        |  |  |
| SARS-CoV-2 Reference Genome NC_045512.2              | (19693)  | TCATCATTAATAACACTGTTTACACAAAAGTTGATGGTGTGATGTAGAATTGTTTGAAAT                    | -----AAAAC                                           |                  |               |        |        |        |        |  |  |
|                                                      |          | Section 2039                                                                    |                                                      |                  |               |        |        |        |        |  |  |
|                                                      | (156927) | 156927                                                                          | 156937                                               | 156948           | 156959        | 156970 | 156981 | 156992 | 157003 |  |  |
| Candidatus Carsonella ruddii strain BT chromosome... | (156549) | ATCAATATCTGAAAAAATGACAATTTGTAATATGTCTATAGAAGCTGGTTCTAAATCTAGTTTAAATTTCCACCAGATA |                                                      |                  |               |        |        |        |        |  |  |
| Candidatus Carsonella 135557 - 167442nt              | (20993)  | ATCAATATCTGAAAAAATGACAATTTGTAATATGTCTATAGAAGCTGGTTCTAAATCTAGTTTAAATTTCCACCAGATA |                                                      |                  |               |        |        |        |        |  |  |
| SARS-CoV-2 Reference Genome NC_045512.2              | (19761)  | AACATTACCTGTTAAATGTAGCATTTGAGCTTTGGGCTA                                         | ----AGCGCAACA                                        | TTAAACAGT        | -----ACCAGAGG |        |        |        |        |  |  |
|                                                      |          | Section 2040                                                                    |                                                      |                  |               |        |        |        |        |  |  |
|                                                      | (157004) | 157004                                                                          | 157014                                               | 157025           | 157036        | 157047 | 157058 | 157069 | 157080 |  |  |
| Candidatus Carsonella ruddii strain BT chromosome... | (156626) | TAAAAATAATTAATTTTTTATAAAAAAATAATTATTGATATTAAAAAATTTTATTTTTTA                    | TAAATAAAATAAAATC                                     |                  |               |        |        |        |        |  |  |
| Candidatus Carsonella 135557 - 167442nt              | (21070)  | TAAAAATAATTAATTTTTTATAAAAAAATAATTATTGATATTAAAAAATTTTATTTTTTA                    | TAAATAAAATAAAATC                                     |                  |               |        |        |        |        |  |  |
| SARS-CoV-2 Reference Genome NC_045512.2              | (19826)  | TGAAAATACTCAATAATTGGGTGTGGACATTGCTGCTAATAC                                      | -----TGTGATCTGGGAC                                   | TACAAAAGAGATGCTC |               |        |        |        |        |  |  |

## SARS-CoV-2 &amp; Bakterien.apr

| Section 2041                                         |          |                                   |            |                  |             |                |                     |                |                                    |
|------------------------------------------------------|----------|-----------------------------------|------------|------------------|-------------|----------------|---------------------|----------------|------------------------------------|
|                                                      | (157081) | 157081                            | 157091     | 157102           | 157113      | 157124         | 157135              | 157146         | 157157                             |
| Candidatus Carsonella ruddii strain BT chromosome... | (156702) | TAATAAAAAAT                       | TCTTTT     | TATGAAAAACGTTAT  | TATTTT      | TGATGTATCT     | TAAAAATAAAACCACACTT | AA             | CATGGGGTACA                        |
| Candidatus Carsonella 135557 - 167442nt              | (21146)  | TAATAAAAAAT                       | TCTTTT     | TATGAAAAACGTTAT  | TATTTT      | TGATGTATCT     | TAAAAATAAAACCACACTT | AA             | CATGGGGTACA                        |
| SARS-CoV-2 Reference Genome NC_045512.2              | (19898)  | CAGCACA                           | TATATCTACT | TATTG            | GTGTTT      | GTTCTAT        | GACTGAC             | TGACATAGC      | CAAGA---AACCA-CTGAA-----ACG        |
| Section 2042                                         |          |                                   |            |                  |             |                |                     |                |                                    |
|                                                      | (157158) | 157158                            | 157168     | 157179           | 157190      | 157201         | 157212              | 157223         | 157234                             |
| Candidatus Carsonella ruddii strain BT chromosome... | (156778) | AATTTAGATACAATAATTGA              | ACTTGA     | AAATATTAAAACTAAT | TGATATTA    | TATATATTAAATT  | TATATGAATTTAAA      |                |                                    |
| Candidatus Carsonella 135557 - 167442nt              | (21222)  | AATTTAGATACAATAATTGA              | ACTTGA     | AAATATTAAAACTAAT | TGATATTA    | TATATATTAAATT  | TATATGAATTTAAA      |                |                                    |
| SARS-CoV-2 Reference Genome NC_045512.2              | (19963)  | ATTTGTGCAC                        | CAC        | TCTG             | TTTTTGA     | -----TG        | GTA-----G           | AGTTG          | -----                              |
| Section 2043                                         |          |                                   |            |                  |             |                |                     |                |                                    |
|                                                      | (157235) | 157235                            | 157245     | 157256           | 157267      | 157278         | 157289              | 157300         | 157311                             |
| Candidatus Carsonella ruddii strain BT chromosome... | (156855) | AAATAATCAAAAAATTACTAATATTAAAAATTC | AAAAAATGTT | TTTAGGATCATGTAC  | AAATTC      | AAGATTTGAAGATT |                     |                |                                    |
| Candidatus Carsonella 135557 - 167442nt              | (21299)  | AAATAATCAAAAAATTACTAATATTAAAAATTC | AAAAAATGTT | TTTAGGATCATGTAC  | AAATTC      | AAGATTTGAAGATT |                     |                |                                    |
| SARS-CoV-2 Reference Genome NC_045512.2              | (20003)  | --ATGGTCAAGTA--G                  | ACTTATTTAG | AAATG            | CCGT        | AATGGTGT       | TTCTTAT----         | TACAGAAGGTAG   | TGTTAAGGTT                         |
| Section 2044                                         |          |                                   |            |                  |             |                |                     |                |                                    |
|                                                      | (157312) | 157312                            | 157322     | 157333           | 157344      | 157355         | 157366              | 157377         | 157388                             |
| Candidatus Carsonella ruddii strain BT chromosome... | (156932) | TATTAATTTGTTGTTTATTGT             | TATTAATAA  | AAATTAAT         | AAAAATGTTAT | TGGATTAATTG    | TCCTGGA             |                |                                    |
| Candidatus Carsonella 135557 - 167442nt              | (21376)  | TATTAATTTGTTGTTTATTGT             | TATTAATAA  | AAATTAAT         | AAAAATGTTAT | TGGATTAATTG    | TCCTGGA             |                |                                    |
| SARS-CoV-2 Reference Genome NC_045512.2              | (20072)  | TACAA                             | CCATCT     | -----GT-----     | AGGTCCC     | AAAC           | AA                  | GC             | TAGTCTTAATGGAGTCACATTAATTGGA---GAA |
| Section 2045                                         |          |                                   |            |                  |             |                |                     |                |                                    |
|                                                      | (157389) | 157389                            | 157399     | 157410           | 157421      | 157432         | 157443              | 157454         | 157465                             |
| Candidatus Carsonella ruddii strain BT chromosome... | (157009) | ACTGAATATATAAGAT                  | TAAAA      | TCAGAA           | TTTTATGGTAT | AAATAAAATTTT   | TATTTT              | TTTGGTTA       | TAATTGGAAAAA                       |
| Candidatus Carsonella 135557 - 167442nt              | (21453)  | ACTGAATATATAAGAT                  | TAAAA      | TCAGAA           | TTTTATGGTAT | AAATAAAATTTT   | TATTTT              | TTTGGTTA       | TAATTGGAAAAA                       |
| SARS-CoV-2 Reference Genome NC_045512.2              | (20131)  | GCG                               | -----TAAAA | ACA              | CAGTT       | CAT--TATT      | ATAGAAAGTT          | GATGGTGT       | TGTCCAACAATTACCTGAA                |
| Section 2046                                         |          |                                   |            |                  |             |                |                     |                |                                    |
|                                                      | (157466) | 157466                            | 157476     | 157487           | 157498      | 157509         | 157520              | 157531         | 157542                             |
| Candidatus Carsonella ruddii strain BT chromosome... | (157086) | TTCTGGTTGTTCTATGTGTTTAGCAAT       | GAA        | TGAA             | GATAAAC     | TTTTACCTGA     | AGAAAGATGTGTTT      | CTACATCTAATA   |                                    |
| Candidatus Carsonella 135557 - 167442nt              | (21530)  | TTCTGGTTGTTCTATGTGTTTAGCAAT       | GAA        | TGAA             | GATAAAC     | TTTTACCTGA     | AGAAAGATGTGTTT      | CTACATCTAATA   |                                    |
| SARS-CoV-2 Reference Genome NC_045512.2              | (20194)  | A-CTTACTTTACT                     | CAG        | AGTAG            | AAATTTAC    | AGAA           | TTTAAAC             | -----CCAGGAGTC | AAATGGAAATGTGATTCTCT--TA           |

## SARS-CoV-2 &amp; Bakterien.apr

|                                                      |          |                                                                                   |        |        |        |        |        |        |        |
|------------------------------------------------------|----------|-----------------------------------------------------------------------------------|--------|--------|--------|--------|--------|--------|--------|
| Section 2047                                         |          |                                                                                   |        |        |        |        |        |        |        |
|                                                      | (157543) | 157543                                                                            | 157553 | 157564 | 157575 | 157586 | 157597 | 157608 | 157619 |
| Candidatus Carsonella ruddii strain BT chromosome... | (157163) | GAAATTTTATAGGAAGACAAGGTTATAAAAGTAGAACACATTTAGTAAGTCCTGTTTATAGCAATAATTATTTCTATT    |        |        |        |        |        |        |        |
| Candidatus Carsonella 135557 - 167442nt              | (21607)  | GAAATTTTATAGGAAGACAAGGTTATAAAAGTAGAACACATTTAGTAAGTCCTGTTTATAGCAATAATTATTTCTATT    |        |        |        |        |        |        |        |
| SARS-CoV-2 Reference Genome NC_045512.2              | (20263)  | GAA-TTAGCTATGGATGAATTCAATTGAA-CGGTATA-----AATTAGAAAGGCTATGCTTTCG-----AACATATCG-TT |        |        |        |        |        |        |        |
| Section 2048                                         |          |                                                                                   |        |        |        |        |        |        |        |
|                                                      | (157620) | 157620                                                                            | 157630 | 157641 | 157652 | 157663 | 157674 | 157685 | 157696 |
| Candidatus Carsonella ruddii strain BT chromosome... | (157240) | TATGGCGAATTTGTTAATTATAAATTTATATAAATAAATTAATAAATGAAATTAATTTCTAATTATATTTATTTTAAATA  |        |        |        |        |        |        |        |
| Candidatus Carsonella 135557 - 167442nt              | (21684)  | TATGGCGAATTTGTTAATTATAAATTTATATAAATAAATTAATAAATGAAATTAATTTCTAATTATATTTATTTTAAATA  |        |        |        |        |        |        |        |
| SARS-CoV-2 Reference Genome NC_045512.2              | (20329)  | TATGGAGATTTTAGTTCATAGTTCAGTTAGGTGGTTTACATCTAC-TGATTGGACTAGCTAAACGTTTAAAGGAATCAC   |        |        |        |        |        |        |        |
| Section 2049                                         |          |                                                                                   |        |        |        |        |        |        |        |
|                                                      | (157697) | 157697                                                                            | 157707 | 157718 | 157729 | 157740 | 157751 | 157762 | 157773 |
| Candidatus Carsonella ruddii strain BT chromosome... | (157317) | TAGATAATATAGATACTGATATTATAATTCCTAAACAAATTTTAAATACCTTTGAAAAAAATGGTTTTCGAAAAATGT    |        |        |        |        |        |        |        |
| Candidatus Carsonella 135557 - 167442nt              | (21761)  | TAGATAATATAGATACTGATATTATAATTCCTAAACAAATTTTAAATACCTTTGAAAAAAATGGTTTTCGAAAAATGT    |        |        |        |        |        |        |        |
| SARS-CoV-2 Reference Genome NC_045512.2              | (20405)  | CTTTTGAATTAGAGATTTTATTCTTATGGACAGTACAGTTTAAACCTAATTTCAATACAGATGCG---CAAAACAGGT    |        |        |        |        |        |        |        |
| Section 2050                                         |          |                                                                                   |        |        |        |        |        |        |        |
|                                                      | (157774) | 157774                                                                            | 157784 | 157795 | 157806 | 157817 | 157828 | 157839 | 157850 |
| Candidatus Carsonella ruddii strain BT chromosome... | (157394) | TTATTTTGTGATTTAAGATATTTTATAAATAACAAATATTTTATTATTAATAATGATTTTAAATTAATAAATAAAAAA    |        |        |        |        |        |        |        |
| Candidatus Carsonella 135557 - 167442nt              | (21838)  | TTATTTTGTGATTTAAGATATTTTATAAATAACAAATATTTTATTATTAATAATGATTTTAAATTAATAAATAAAAAA    |        |        |        |        |        |        |        |
| SARS-CoV-2 Reference Genome NC_045512.2              | (20479)  | TCACTTAAGTGTGTGTGTTCTGTTAT-----TGATTTATTACT---TGATGATTTTG-TTGAAATAATAAAAAT        |        |        |        |        |        |        |        |
| Section 2051                                         |          |                                                                                   |        |        |        |        |        |        |        |
|                                                      | (157851) | 157851                                                                            | 157861 | 157872 | 157883 | 157894 | 157905 | 157916 | 157927 |
| Candidatus Carsonella ruddii strain BT chromosome... | (157471) | AACTAAAGTATTAATTTCAAAAAAAATTTTGGATGTGGAAGTTC-AGAGAACATGCAGTTTGGGCATTAAAAAAT       |        |        |        |        |        |        |        |
| Candidatus Carsonella 135557 - 167442nt              | (21915)  | AACTAAAGTATTAATTTCAAAAAAAATTTTGGATGTGGAAGTTC-AGAGAACATGCAGTTTGGGCATTAAAAAAT       |        |        |        |        |        |        |        |
| SARS-CoV-2 Reference Genome NC_045512.2              | (20543)  | --CCCAGATTTATCTGTAGTTTCTAA-----GGTGTGCAAGTGACTATTGACTATACAGAAATTTTATTATATGC--     |        |        |        |        |        |        |        |
| Section 2052                                         |          |                                                                                   |        |        |        |        |        |        |        |
|                                                      | (157928) | 157928                                                                            | 157938 | 157949 | 157960 | 157971 | 157982 | 157993 | 158004 |
| Candidatus Carsonella ruddii strain BT chromosome... | (157547) | TTTGGTTTTTAAATAATAATATCAGAAAGTTTATGTGATATATTTTATGATAATTCTATGAAAAATAATTTGTTTTT     |        |        |        |        |        |        |        |
| Candidatus Carsonella 135557 - 167442nt              | (21991)  | TTTGGTTTTTAAATAATAATATCAGAAAGTTTATGTGATATATTTTATGATAATTCTATGAAAAATAATTTGTTTTT     |        |        |        |        |        |        |        |
| SARS-CoV-2 Reference Genome NC_045512.2              | (20612)  | TTTGGTGTAAAGATGGCCATGTAGAAACATTTTACCCAAA-----ATTACAAT-CTAGTCAAAG--C-----GTGGCA    |        |        |        |        |        |        |        |

## SARS-CoV-2 &amp; Bakterien.apr

| Section 2053                                         |          |                                                                                   |        |        |        |        |        |        |        |
|------------------------------------------------------|----------|-----------------------------------------------------------------------------------|--------|--------|--------|--------|--------|--------|--------|
|                                                      | (158005) | 158005                                                                            | 158015 | 158026 | 158037 | 158048 | 158059 | 158070 | 158081 |
| Candidatus Carsonella ruddii strain BT chromosome... | (157624) | AATAGAAATTTACAAAAAACAAATTGAAAAAATTTTAAATTATTAATATATATATTTTAAATATAGAAAAACAATATA    |        |        |        |        |        |        |        |
| Candidatus Carsonella 135557 - 167442nt              | (22068)  | AATAGAAATTTACAAAAAACAAATTGAAAAAATTTTAAATTATTAATATATATATTTTAAATATAGAAAAACAATATA    |        |        |        |        |        |        |        |
| SARS-CoV-2 Reference Genome NC_045512.2              | (20676)  | ACCGGGTGTGTTGCTATGCCTAATCTTTTACAAAAATGCAAG----AATGCTAT-----TAGAAAAGTGTGACC        |        |        |        |        |        |        |        |
| Section 2054                                         |          |                                                                                   |        |        |        |        |        |        |        |
|                                                      | (158082) | 158082                                                                            | 158092 | 158103 | 158114 | 158125 | 158136 | 158147 | 158158 |
| Candidatus Carsonella ruddii strain BT chromosome... | (157701) | TTAAATTTGATAAATTATATTATTATTTTTTAATTAATAAAATTATATATAAAATATTTTATATAAATAAATTTTATTATA |        |        |        |        |        |        |        |
| Candidatus Carsonella 135557 - 167442nt              | (22145)  | TTAAATTTGATAAATTATATTATTATTTTTTAATTAATAAAATTATATATAAAATATTTTATATAAATAAATTTTATTATA |        |        |        |        |        |        |        |
| SARS-CoV-2 Reference Genome NC_045512.2              | (20738)  | TTCAA-----AATTATGGTGTAGATGTGCAACATTACCTAAAGGCATAATGATGAATGTTCGCAAAATATACCTCA---   |        |        |        |        |        |        |        |
| Section 2055                                         |          |                                                                                   |        |        |        |        |        |        |        |
|                                                      | (158159) | 158159                                                                            | 158169 | 158180 | 158191 | 158202 | 158213 | 158224 | 158235 |
| Candidatus Carsonella ruddii strain BT chromosome... | (157778) | ACTGATTTTATATTAAAGAAAAAAGAAATAATTTATTATTATAA-ATAAATGTTAAATATTTTGGTTTTACCTGG       |        |        |        |        |        |        |        |
| Candidatus Carsonella 135557 - 167442nt              | (22222)  | ACTGATTTTATATTAAAGAAAAAAGAAATAATTTATTATTATAA-ATAAATGTTAAATATTTTGGTTTTACCTGG       |        |        |        |        |        |        |        |
| SARS-CoV-2 Reference Genome NC_045512.2              | (20805)  | ACTGTGTCAATATTTA-AAACAATTAAATTAGCTGTACCTTATTAATATGAGATTATACATTTTGGT----GCTGG      |        |        |        |        |        |        |        |
| Section 2056                                         |          |                                                                                   |        |        |        |        |        |        |        |
|                                                      | (158236) | 158236                                                                            | 158246 | 158257 | 158268 | 158279 | 158290 | 158301 | 158312 |
| Candidatus Carsonella ruddii strain BT chromosome... | (157854) | TGATGGTATAGGTCCAGAAATAATGAAACAAGCTATTAAAATTATTAAACATGTATTTATTAGGATATAAAATTA       |        |        |        |        |        |        |        |
| Candidatus Carsonella 135557 - 167442nt              | (22298)  | TGATGGTATAGGTCCAGAAATAATGAAACAAGCTATTAAAATTATTAAACATGTATTTATTAGGATATAAAATTA       |        |        |        |        |        |        |        |
| SARS-CoV-2 Reference Genome NC_045512.2              | (20877)  | TTCGTGATAAAGGAGTTGCCA--GGTACA-GCTGTT-----TTAAGACA-GTGGTTGCCACGGG-TACGCTTGC        |        |        |        |        |        |        |        |
| Section 2057                                         |          |                                                                                   |        |        |        |        |        |        |        |
|                                                      | (158313) | 158313                                                                            | 158323 | 158334 | 158345 | 158356 | 158367 | 158378 | 158389 |
| Candidatus Carsonella ruddii strain BT chromosome... | (157931) | ATATTTATTATAATTATATTGGTGGTATATCTATTGATAAAAATAAAAAATCCTTTAACAGAAAAATACAAATTAAAATT  |        |        |        |        |        |        |        |
| Candidatus Carsonella 135557 - 167442nt              | (22375)  | ATATTTATTATAATTATATTGGTGGTATATCTATTGATAAAAATAAAAAATCCTTTAACAGAAAAATACAAATTAAAATT  |        |        |        |        |        |        |        |
| SARS-CoV-2 Reference Genome NC_045512.2              | (20942)  | TGTTCGATTAGATCTTAATGACTTTGTCCTCT---GATGCAAGATTCAACTTTGATTGGTGAATTGTGCAACTGTACAT   |        |        |        |        |        |        |        |
| Section 2058                                         |          |                                                                                   |        |        |        |        |        |        |        |
|                                                      | (158390) | 158390                                                                            | 158400 | 158411 | 158422 | 158433 | 158444 | 158455 | 158466 |
| Candidatus Carsonella ruddii strain BT chromosome... | (158008) | TGTTTAAATTCAGATGCTATCTTATTAGGT-TGTGTTGGAGGATATAAATGGAATAATTCTTTTTTAAAAACCTGAAC    |        |        |        |        |        |        |        |
| Candidatus Carsonella 135557 - 167442nt              | (22452)  | TGTTTAAATTCAGATGCTATCTTATTAGGT-TGTGTTGGAGGATATAAATGGAATAATTCTTTTTTAAAAACCTGAAC    |        |        |        |        |        |        |        |
| SARS-CoV-2 Reference Genome NC_045512.2              | (21016)  | ACAGCTAAT--AAATGGGATCTCATTATTAGTGATATGTACGACCTAA--GACTAAAAATGTTACAAAA-----        |        |        |        |        |        |        |        |

## SARS-CoV-2 &amp; Bakterien.apr

| Section 2059                                         |          |                  |                 |                 |                              |                         |                  |              |                  |
|------------------------------------------------------|----------|------------------|-----------------|-----------------|------------------------------|-------------------------|------------------|--------------|------------------|
|                                                      | (158467) | 158467           | 158477          | 158488          | 158499                       | 158510                  | 158521           | 158532       | 158543           |
| Candidatus Carsonella ruddii strain BT chromosome... | (158084) | AAGGTTTGTT       | AAAATTAAGAAAAA  | ATTAAATTTATT    | TGCAAAATATTAGACCTATTAAATGTCT | TTTTTAAAAATATA          |                  |              |                  |
| Candidatus Carsonella 135557 - 167442nt              | (22528)  | AAGGTTTGTT       | AAAATTAAGAAAAA  | ATTAAATTTATT    | TGCAAAATATTAGACCTATTAAATGTCT | TTTTTAAAAATATA          |                  |              |                  |
| SARS-CoV-2 Reference Genome NC_045512.2              | (21082)  | --G-----         | AAAATGA         | CTCTAAA         | GAGGG--TTT                   | TTTCACTTACATTGTGGGT     | TTA----          | TACAAC--     | AAAAGC           |
| Section 2060                                         |          |                  |                 |                 |                              |                         |                  |              |                  |
|                                                      | (158544) | 158544           | 158554          | 158565          | 158576                       | 158587                  | 158598           | 158609       | 158620           |
| Candidatus Carsonella ruddii strain BT chromosome... | (158161) | GATTTTTTAATTT    | TAAAGAGAAT      | TAAATGGAGGA     | ATTTATTATG                   | GAAAACCAAAGGTATTTCTAAAC | CAAAATAATTA      |              |                  |
| Candidatus Carsonella 135557 - 167442nt              | (22605)  | GATTTTTTAATTT    | TAAAGAGAAT      | TAAATGGAGGA     | ATTTATTATG                   | GAAAACCAAAGGTATTTCTAAAC | CAAAATAATTA      |              |                  |
| SARS-CoV-2 Reference Genome NC_045512.2              | (21142)  | GCTCTTGG         | AGGTTCCGTG      | GCTATAAAGAT     | ACAGAACATTCT                 | TGGAA                   | TGCT---          | GATCTTTA     | TAAAGC---        |
| Section 2061                                         |          |                  |                 |                 |                              |                         |                  |              |                  |
|                                                      | (158621) | 158621           | 158631          | 158642          | 158653                       | 158664                  | 158675           | 158686       | 158697           |
| Candidatus Carsonella ruddii strain BT chromosome... | (158238) | TAATATACCA       | ACTTGGTTTTCT    | TATGATACAGAAATT | TATAATGAA                    | CAAGAATTAA              | TAAGA-GTA        | ATTAAATTAGGT |                  |
| Candidatus Carsonella 135557 - 167442nt              | (22682)  | TAATATACCA       | ACTTGGTTTTCT    | TATGATACAGAAATT | TATAATGAA                    | CAAGAATTAA              | TAAGA-GTA        | ATTAAATTAGGT |                  |
| SARS-CoV-2 Reference Genome NC_045512.2              | (21213)  | ACACTTCG         | CATGGTGG        | ACAGCCTT        | TGTAC-----                   | TAATGTGAA               | TGCGTCA          | TCTCATCTGA   | AGCATTTTTAATTGGA |
| Section 2062                                         |          |                  |                 |                 |                              |                         |                  |              |                  |
|                                                      | (158698) | 158698           | 158708          | 158719          | 158730                       | 158741                  | 158752           | 158763       | 158774           |
| Candidatus Carsonella ruddii strain BT chromosome... | (158314) | TTTAATTTATCTATGA | ATAGAAAAA       | AAAAATTA        | CTTCTATAGAT                  | AAATCTAATGTATTAATTTCT   | TTCTAAATTATG     |              |                  |
| Candidatus Carsonella 135557 - 167442nt              | (22758)  | TTTAATTTATCTATGA | ATAGAAAAA       | AAAAATTA        | CTTCTATAGAT                  | AAATCTAATGTATTAATTTCT   | TTCTAAATTATG     |              |                  |
| SARS-CoV-2 Reference Genome NC_045512.2              | (21283)  | TGTAATT-         | ATCTTGGCA       | AAACCACGCG      | AACAATAGAT                   | TGGTTATGTCTATG          | CATGC            | AAATTA       | CATATTTGGAGGAATA |
| Section 2063                                         |          |                  |                 |                 |                              |                         |                  |              |                  |
|                                                      | (158775) | 158775           | 158785          | 158796          | 158807                       | 158818                  | 158829           | 158840       | 158851           |
| Candidatus Carsonella ruddii strain BT chromosome... | (158391) | GAGAAAAATTGT     | TAAATTATATTTCTA | ATTTT--TTAGCA   | ATATTAAGGTTAATCATTTATATATTG  | ACTATGCTAC              |                  |              |                  |
| Candidatus Carsonella 135557 - 167442nt              | (22835)  | GAGAAAAATTGT     | TAAATTATATTTCTA | ATTTT--TTAGCA   | ATATTAAGGTTAATCATTTATATATTG  | ACTATGCTAC              |                  |              |                  |
| SARS-CoV-2 Reference Genome NC_045512.2              | (21359)  | CAAA             | TCCAAT-TCAG     | TTGTCTTCTAT     | TCTTTATTTGAC                 | ATGAGTAAATTTCCC         | CTTAAATTAAGGG    | GTACTGCT     | GT               |
| Section 2064                                         |          |                  |                 |                 |                              |                         |                  |              |                  |
|                                                      | (158852) | 158852           | 158862          | 158873          | 158884                       | 158895                  | 158906           | 158917       | 158928           |
| Candidatus Carsonella ruddii strain BT chromosome... | (158466) | AATTGAATTAATA    | AAAAAATTATA     | AATAATTTTGATAT  | AATTTTAACT                   | TCAAATATATTTGGT         | -GATATATTATCTGAT |              |                  |
| Candidatus Carsonella 135557 - 167442nt              | (22910)  | AATTGAATTAATA    | AAAAAATTATA     | AATAATTTTGATAT  | AATTTTAACT                   | TCAAATATATTTGGT         | -GATATATTATCTGAT |              |                  |
| SARS-CoV-2 Reference Genome NC_045512.2              | (21435)  | TATGTCT          | TTAAAGAGG       | TCAATCAA---     | TGATATGATTTTA                | TCTCTTCTAG              | TAAAGGTAGACT     | TAT          | AATTAGAG         |



## SARS-CoV-2 &amp; Bakterien.apr

|                                                      |          |                                                                                  |        |        |        |        |        |               |
|------------------------------------------------------|----------|----------------------------------------------------------------------------------|--------|--------|--------|--------|--------|---------------|
|                                                      |          | Section 2065                                                                     |        |        |        |        |        |               |
|                                                      | (158929) | 158929                                                                           | 158939 | 158950 | 158961 | 158972 | 158983 | 158994 159005 |
| Candidatus Carsonella ruddii strain BT chromosome... | (158542) | CAATGTTCTTTATTAACTGGTTTCATTAGGAATGTTGCGCTTCAATTTCTATAAAATAATAAATCAATTTGTTTATTTGA |        |        |        |        |        |               |
| Candidatus Carsonella 135557 - 167442nt              | (22986)  | CAATGTTCTTTATTAACTGGTTTCATTAGGAATGTTGCGCTTCAATTTCTATAAAATAATAAATCAATTTGTTTATTTGA |        |        |        |        |        |               |
| SARS-CoV-2 Reference Genome NC_045512.2              | (21509)  | AAACA-----ACAGAGTTGTT-ATTTCCTAGTGATG--TTCT-TGTTAACAACCTAAACGAACAATGT-TTGTTTT-    |        |        |        |        |        |               |
|                                                      |          | Section 2066                                                                     |        |        |        |        |        |               |
|                                                      | (159006) | 159006                                                                           | 159016 | 159027 | 159038 | 159049 | 159060 | 159071 159082 |
| Candidatus Carsonella ruddii strain BT chromosome... | (158619) | ACCATGTCATGGAAGTGCGCCAGATATAGCTGGTAAAAACATAGCAAAATCCAATAGGGATTTTATTATCTTTAGTTA   |        |        |        |        |        |               |
| Candidatus Carsonella 135557 - 167442nt              | (23063)  | ACCATGTCATGGAAGTGCGCCAGATATAGCTGGTAAAAACATAGCAAAATCCAATAGGGATTTTATTATCTTTAGTTA   |        |        |        |        |        |               |
| SARS-CoV-2 Reference Genome NC_045512.2              | (21575)  | -CT-TGTTT--AT-TG--CCACTAGTCTCTAGTCAAGTGTGTTAATCTTACAAACCAAGAACTCAATTAACCCCTGCA-  |        |        |        |        |        |               |
|                                                      |          | Section 2067                                                                     |        |        |        |        |        |               |
|                                                      | (159083) | 159083                                                                           | 159093 | 159104 | 159115 | 159126 | 159137 | 159148 159159 |
| Candidatus Carsonella ruddii strain BT chromosome... | (158696) | TGTTATTTGAATATTTTATTAAATAATAAAAAATTATCTAATAAAATTTT-ATTCT-ATTTATAAAGTTTATCAT      |        |        |        |        |        |               |
| Candidatus Carsonella 135557 - 167442nt              | (23140)  | TGTTATTTGAATATTTTATTAAATAATAAAAAATTATCTAATAAAATTTT-ATTCT-ATTTATAAAGTTTATCAT      |        |        |        |        |        |               |
| SARS-CoV-2 Reference Genome NC_045512.2              | (21644)  | --TACACTAATCTTTTACACGTTGGTGTGTTATACCCTGACAAAGTTTTCAGATCCTCAGTTTATCAATCAACTCAG    |        |        |        |        |        |               |
|                                                      |          | Section 2068                                                                     |        |        |        |        |        |               |
|                                                      | (159160) | 159160                                                                           | 159170 | 159181 | 159192 | 159203 | 159214 | 159225 159236 |
| Candidatus Carsonella ruddii strain BT chromosome... | (158771) | TTGGTTTTTGTACAATTGATATGAAAAATTTTTTAAAAAAAAAAAAATAATTTCTACAGAGAATTTGGAGATTTA      |        |        |        |        |        |               |
| Candidatus Carsonella 135557 - 167442nt              | (23215)  | TTGGTTTTTGTACAATTGATATGAAAAATTTTTTAAAAAAAAAAAAATAATTTCTACAGAGAATTTGGAGATTTA      |        |        |        |        |        |               |
| SARS-CoV-2 Reference Genome NC_045512.2              | (21719)  | GACTTGTTCTTACCTTTCTTTCCAAATGTTACTTGGTTC----CA-----TGCTATACATGTCTCTGGGAGCCAA      |        |        |        |        |        |               |
|                                                      |          | Section 2069                                                                     |        |        |        |        |        |               |
|                                                      | (159237) | 159237                                                                           | 159247 | 159258 | 159269 | 159280 | 159291 | 159302 159313 |
| Candidatus Carsonella ruddii strain BT chromosome... | (158848) | GTAAATTATTATTTTTTATATGATTAAATTTAGGAATAATTGCTTGAGAGGTTTGTGGAAGTGTTTTAAATAAATA     |        |        |        |        |        |               |
| Candidatus Carsonella 135557 - 167442nt              | (23292)  | GTAAATTATTATTTTTTATATGATTAAATTTAGGAATAATTGCTTGAGAGGTTTGTGGAAGTGTTTTAAATAAATA     |        |        |        |        |        |               |
| SARS-CoV-2 Reference Genome NC_045512.2              | (21784)  | TGGTACTAGAGGTTTGATAACCTGTCTTCCATTAATGATGGTGTGTTATTTTGCTTCCACTG---AGAGGTCAT       |        |        |        |        |        |               |
|                                                      |          | Section 2070                                                                     |        |        |        |        |        |               |
|                                                      | (159314) | 159314                                                                           | 159324 | 159335 | 159346 | 159357 | 159368 | 159379 159390 |
| Candidatus Carsonella ruddii strain BT chromosome... | (158925) | GAATAAAAAATAGCTTTATTTATAAATATTGTAATATATATTTATTTCTACAAATAAATAAATAAATAAAAAATGAT    |        |        |        |        |        |               |
| Candidatus Carsonella 135557 - 167442nt              | (23369)  | GAATAAAAAATAGCTTTATTTATAAATATTGTAATATATATTTATTTCTACAAATAAATAAATAAATAAAAAATGAT    |        |        |        |        |        |               |
| SARS-CoV-2 Reference Genome NC_045512.2              | (21858)  | ACATAATAAAGAGGCTGGATTTT--G----GTACTA---CTTTAGATTCGAGAGCCAGTCCCTACTTAT---TGTT     |        |        |        |        |        |               |

## SARS-CoV-2 &amp; Bakterien.apr

| Section 2071                                         |          |              |                |                 |                |               |               |             |                                   |
|------------------------------------------------------|----------|--------------|----------------|-----------------|----------------|---------------|---------------|-------------|-----------------------------------|
|                                                      | (159391) | 159391       | 159401         | 159412          | 159423         | 159434        | 159445        | 159456      | 159467                            |
| Candidatus Carsonella ruddii strain BT chromosome... | (159002) | ATAAACGATGC  | CATATAATAT     | AAAAATTATTAAAA  | AAATATGAATAT   | TAATAATTTGT   | TGTCAAGGAAGTA | ATTTTACAAA  |                                   |
| Candidatus Carsonella 135557 - 167442nt              | (23446)  | ATAAACGATGC  | CATATAATAT     | AAAAATTATTAAAA  | AAATATGAATAT   | TAATAATTTGT   | TGTCAAGGAAGTA | ATTTTACAAA  |                                   |
| SARS-CoV-2 Reference Genome NC_045512.2              | (21923)  | AATACGC      | TAC---         | TAATGT          | TG--TTATTAAAA  | GTC           | TGTGAATT      | TCA-ATTTTGT | ----AATGATCCATTTTGGGTG            |
| Section 2072                                         |          |              |                |                 |                |               |               |             |                                   |
|                                                      | (159468) | 159468       | 159478         | 159489          | 159500         | 159511        | 159522        | 159533      | 159544                            |
| Candidatus Carsonella ruddii strain BT chromosome... | (159079) | AAAAATTTTAA  | AAAAAATA       | AAAAATTTTAT     | TGGAAAGGTTAT   | TGGATAGATGCT  | TTCTAGTT      | TTTTTAAGAAT | GAATA                             |
| Candidatus Carsonella 135557 - 167442nt              | (23523)  | AAAAATTTTAA  | AAAAAATA       | AAAAATTTTAT     | TGGAAAGGTTAT   | TGGATAGATGCT  | TTCTAGTT      | TTTTTAAGAAT | GAATA                             |
| SARS-CoV-2 Reference Genome NC_045512.2              | (21990)  | TTTA         | -TTACCAC       | AAAAA           | CAACAAAGTT     | GGA           | TGGAAAG       | -TGAGTT     | CAAGAGTTTATTCTAGTGC-----GAAT-AAT  |
| Section 2073                                         |          |              |                |                 |                |               |               |             |                                   |
|                                                      | (159545) | 159545       | 159555         | 159566          | 159577         | 159588        | 159599        | 159610      | 159621                            |
| Candidatus Carsonella ruddii strain BT chromosome... | (159156) | ACGAATGTTCT  | TTAATATTAGAT   | CTTTTAAATAAAGAT | TGATTAAATAAAAA | AAATTAATATATT | AAATTTTCT     |             |                                   |
| Candidatus Carsonella 135557 - 167442nt              | (23600)  | ACGAATGTTCT  | TTAATATTAGAT   | CTTTTAAATAAAGAT | TGATTAAATAAAAA | AAATTAATATATT | AAATTTTCT     |             |                                   |
| SARS-CoV-2 Reference Genome NC_045512.2              | (22059)  | GCACTTTTGAA  | TATGTCCTC      | AGCCTTTTCT      | TATGGA         | CC-TTGAA      | GGAAAA        | CA          | GGGTAAATTTCAA                     |
| Section 2074                                         |          |              |                |                 |                |               |               |             |                                   |
|                                                      | (159622) | 159622       | 159632         | 159643          | 159654         | 159665        | 159676        | 159687      | 159698                            |
| Candidatus Carsonella ruddii strain BT chromosome... | (159233) | GGAGCTAATT   | GTACTGTTAG     | TTTAGCTTTA      | ATTTTATTAAAAAT | TTATTAAAA     | TTAACTTAATAG  | AATGGATTTC  |                                   |
| Candidatus Carsonella 135557 - 167442nt              | (23677)  | GGAGCTAATT   | GTACTGTTAG     | TTTAGCTTTA      | ATTTTATTAAAAAT | TTATTAAAA     | TTAACTTAATAG  | AATGGATTTC  |                                   |
| SARS-CoV-2 Reference Genome NC_045512.2              | (22130)  | --AGGG       | AATT           | TGTGTT          | TAAGAA         | TA--TTGA      | TGGTTATT      | TTAAAA      | TATTCTAAGCACACGCCTATT             |
| Section 2075                                         |          |              |                |                 |                |               |               |             |                                   |
|                                                      | (159699) | 159699       | 159709         | 159720          | 159731         | 159742        | 159753        | 159764      | 159775                            |
| Candidatus Carsonella ruddii strain BT chromosome... | (159310) | CACATCTAGT   | TATCAAGCTAT    | ATCTGGAGCAG     | GTTCAAAAT      | TAGTAACAAA    | ATTATTAA      | TATTAATTTAT | CAT                               |
| Candidatus Carsonella 135557 - 167442nt              | (23754)  | CACATCTAGT   | TATCAAGCTAT    | ATCTGGAGCAG     | GTTCAAAAT      | TAGTAACAAA    | ATTATTAA      | TATTAATTTAT | CAT                               |
| SARS-CoV-2 Reference Genome NC_045512.2              | (22203)  | GTGATCT      | CCC            | T--CAG          | GGTTTTC        | GGCTTTAG      | AAC           | CATTGGTAG   | ATTTGCCAATAGGTAATTAACATCACTAGGTTC |
| Section 2076                                         |          |              |                |                 |                |               |               |             |                                   |
|                                                      | (159776) | 159776       | 159786         | 159797          | 159808         | 159819        | 159830        | 159841      | 159852                            |
| Candidatus Carsonella ruddii strain BT chromosome... | (159387) | ATAATTTAGAAA | TAAATTTATTAAAA | ATTGAAAAAA      | TATTAATTTT     | TTTAA         | AAAAAAATA     | -ATCCAAT    | TATTATA                           |
| Candidatus Carsonella 135557 - 167442nt              | (23831)  | ATAATTTAGAAA | TAAATTTATTAAAA | ATTGAAAAAA      | TATTAATTTT     | TTTAA         | AAAAAAATA     | -ATCCAAT    | TATTATA                           |
| SARS-CoV-2 Reference Genome NC_045512.2              | (22278)  | AAAC         | TTTA           | ---CT           | TGCTTTA        | CATAGAA       | GTTATTTG      | ACTCC       | TGGTGATTCTTCTTCAGGTTGGACAGCTGGTGC |

## SARS-CoV-2 &amp; Bakterien.apr

|                                                      |          | Section 2077                                                                       |        |        |        |        |        |        |               |
|------------------------------------------------------|----------|------------------------------------------------------------------------------------|--------|--------|--------|--------|--------|--------|---------------|
|                                                      |          | (159853)                                                                           | 159853 | 159863 | 159874 | 159885 | 159896 | 159907 | 159918 159929 |
| Candidatus Carsonella ruddii strain BT chromosome... | (159463) | TAATGCTATACCTTGGATAGATAAAAAAGTAAATTT-TAGTCAAACCAAAAGAAGATGGAAATCATCTTCTGAAGCT      |        |        |        |        |        |        |               |
| Candidatus Carsonella 135557 - 167442nt              | (23907)  | TAATGCTATACCTTGGATAGATAAAAAAGTAAATTT-TAGTCAAACCAAAAGAAGATGGAAATCATCTTCTGAAGCT      |        |        |        |        |        |        |               |
| SARS-CoV-2 Reference Genome NC_045512.2              | (22352)  | GCTTATATGTGGGTTATCTTCAACTAGGACTTTTCATTAAAAATATAATGAAATGGAAAC-CAT-TACAGATGCT        |        |        |        |        |        |        |               |
|                                                      |          | Section 2078                                                                       |        |        |        |        |        |        |               |
|                                                      |          | (159930)                                                                           | 159930 | 159940 | 159951 | 159962 | 159973 | 159984 | 159995 160006 |
| Candidatus Carsonella ruddii strain BT chromosome... | (159539) | TCTAAAAATATTAAATAAAAAATTATAATTGATTCAAAATTGTGTAAGAATAGCATCTTTAAGATGTCATTTCACAGTA    |        |        |        |        |        |        |               |
| Candidatus Carsonella 135557 - 167442nt              | (23983)  | TCTAAAAATATTAAATAAAAAATTATAATTGATTCAAAATTGTGTAAGAATAGCATCTTTAAGATGTCATTTCACAGTA    |        |        |        |        |        |        |               |
| SARS-CoV-2 Reference Genome NC_045512.2              | (22427)  | G-TAGACGTGTCACCTTGACCTCTCTCA--GAAACAA--GTGTA-----GGTT--GAAATCTTCACAGTA             |        |        |        |        |        |        |               |
|                                                      |          | Section 2079                                                                       |        |        |        |        |        |        |               |
|                                                      |          | (160007)                                                                           | 160007 | 160017 | 160028 | 160039 | 160050 | 160061 | 160072 160083 |
| Candidatus Carsonella ruddii strain BT chromosome... | (159616) | TTTTTTAATAAAATTTAATAAAAAATATTAAATTTAATAATATATATGAAATTATACATCATAAATTTGTTTATATAG     |        |        |        |        |        |        |               |
| Candidatus Carsonella 135557 - 167442nt              | (24060)  | TTTTTTAATAAAATTTAATAAAAAATATTAAATTTAATAATATATATGAAATTATACATCATAAATTTGTTTATATAG     |        |        |        |        |        |        |               |
| SARS-CoV-2 Reference Genome NC_045512.2              | (22487)  | G----A AAAAGGAATCTATCAAACTTC TAA C-TT TAGAGTCCACCAACA GAATCTATGTTAGATTTCCTA-ATA T  |        |        |        |        |        |        |               |
|                                                      |          | Section 2080                                                                       |        |        |        |        |        |        |               |
|                                                      |          | (160084)                                                                           | 160084 | 160094 | 160105 | 160116 | 160127 | 160138 | 160149 160160 |
| Candidatus Carsonella ruddii strain BT chromosome... | (159693) | TTAAAAATTAATGAAAAAATTCTAATTTAATTTTAAACACCATATTAATGTTATCTGGAAAAATTAAAAATTTTGTAGGT   |        |        |        |        |        |        |               |
| Candidatus Carsonella 135557 - 167442nt              | (24137)  | TTAAAAATTAATGAAAAAATTCTAATTTAATTTTAAACACCATATTAATGTTATCTGGAAAAATTAAAAATTTTGTAGGT   |        |        |        |        |        |        |               |
| SARS-CoV-2 Reference Genome NC_045512.2              | (22558)  | TACAAACTTGTGCCCTTTTGGTG AAGTTT TTAACGC CACCA GATT-TGCATCTG-----TTTATGCTTGGAAACAGGA |        |        |        |        |        |        |               |
|                                                      |          | Section 2081                                                                       |        |        |        |        |        |        |               |
|                                                      |          | (160161)                                                                           | 160161 | 160171 | 160182 | 160193 | 160204 | 160215 | 160226 160237 |
| Candidatus Carsonella ruddii strain BT chromosome... | (159770) | AGA--ATTAAAAAAGTTTAAATTAATAATAAAATTTTACAAATGTTTAGCATAGGAGATCAATTATT-GTGGGGTGC      |        |        |        |        |        |        |               |
| Candidatus Carsonella 135557 - 167442nt              | (24214)  | AGA--ATTAAAAAAGTTTAAATTAATAATAAAATTTTACAAATGTTTAGCATAGGAGATCAATTATT-GTGGGGTGC      |        |        |        |        |        |        |               |
| SARS-CoV-2 Reference Genome NC_045512.2              | (22629)  | AGAGAATCAGCAACTGTGTGCTGATTATTCTGTCCCT-ATA TAAATCCGCATCATTTTCACCTTTTAAAGTGTTATGG    |        |        |        |        |        |        |               |
|                                                      |          | Section 2082                                                                       |        |        |        |        |        |        |               |
|                                                      |          | (160238)                                                                           | 160238 | 160248 | 160259 | 160270 | 160281 | 160292 | 160303 160314 |
| Candidatus Carsonella ruddii strain BT chromosome... | (159844) | AGCTGAACCTATTAAAAAGATTTTGTAGAAATATTAAATAAGTAATATATTATGAAATTTAAATTTTGTGGTGTAAAAAA   |        |        |        |        |        |        |               |
| Candidatus Carsonella 135557 - 167442nt              | (24288)  | AGCTGAACCTATTAAAAAGATTTTGTAGAAATATTAAATAAGTAATATATTATGAAATTTAAATTTTGTGGTGTAAAAAA   |        |        |        |        |        |        |               |
| SARS-CoV-2 Reference Genome NC_045512.2              | (22705)  | AGTGTCTCCTAC TAAA---TTAAATGATCTCTGCTTAC TAATGTCT-ATGCA GATTCA--TTTGTAA--TTAGAGG    |        |        |        |        |        |        |               |

SARS-CoV-2 & Bakterien.apr

| Section 2083                                         |          |                                                                               |                           |                 |                                              |        |        |        |        |
|------------------------------------------------------|----------|-------------------------------------------------------------------------------|---------------------------|-----------------|----------------------------------------------|--------|--------|--------|--------|
|                                                      | (160315) | 160315                                                                        | 160325                    | 160336          | 160347                                       | 160358 | 160369 | 160380 | 160391 |
| Candidatus Carsonella ruddii strain BT chromosome... | (159921) | TAAAAAAGATATTTAAAAAGCTATTTTATGTAATGCTAATTTTATAGGTTTAAATTTTATAAAAAATAGTAAAGAT  |                           |                 |                                              |        |        |        |        |
| Candidatus Carsonella 135557 - 167442nt              | (24365)  | TAAAAAAGATATTTAAAAAGCTATTTTATGTAATGCTAATTTTATAGGTTTAAATTTTATAAAAAATAGTAAAGAT  |                           |                 |                                              |        |        |        |        |
| SARS-CoV-2 Reference Genome NC_045512.2              | (22774)  | TGATGAAGTCAGACAAATCGCTCCAGGGCAAACCTGGAAGATTGCTGATTATAATTAT----                | AAATTACCAGATGAT           |                 |                                              |        |        |        |        |
| Section 2084                                         |          |                                                                               |                           |                 |                                              |        |        |        |        |
|                                                      | (160392) | 160392                                                                        | 160402                    | 160413          | 160424                                       | 160435 | 160446 | 160457 | 160468 |
| Candidatus Carsonella ruddii strain BT chromosome... | (159998) | TTTACAAAGATA-GTTTFA--TTCCATTAAATTAAAT--GATTCC-----TTCTTATATTTATAA--AGTTGCTTT  |                           |                 |                                              |        |        |        |        |
| Candidatus Carsonella 135557 - 167442nt              | (24442)  | TTTACAAAGATA-GTTTFA--TTCCATTAAATTAAAT--GATTCC-----TTCTTATATTTATAA--AGTTGCTTT  |                           |                 |                                              |        |        |        |        |
| SARS-CoV-2 Reference Genome NC_045512.2              | (22847)  | TTT-ACAGGCTGCGGTTATAGCTTGGGAATTCTTAACAATCTTGATTCTAAGGTGGTGGTATTATATAATTACC    | TGTTATTA                  |                 |                                              |        |        |        |        |
| Section 2085                                         |          |                                                                               |                           |                 |                                              |        |        |        |        |
|                                                      | (160469) | 160469                                                                        | 160479                    | 160490          | 160501                                       | 160512 | 160523 | 160534 | 160545 |
| Candidatus Carsonella ruddii strain BT chromosome... | (160062) | ATTTGTTAATGAAGAAATATAATATAATTAATAAAAATTAAAAATTATTTTGATTTAATTCATTTTCATGGAACGAA |                           |                 |                                              |        |        |        |        |
| Candidatus Carsonella 135557 - 167442nt              | (24506)  | ATTTGTTAATGAAGAAATATAATATAATTAATAAAAATTAAAAATTATTTTGATTTAATTCATTTTCATGGAACGAA |                           |                 |                                              |        |        |        |        |
| SARS-CoV-2 Reference Genome NC_045512.2              | (22923)  | GATTGTTTAGGAAG--TCTAATCTCAAACTTTTGAGAGAGAT-ATTTCAACTGAAATCTATCAGGCCG          | GTAAGCA                   |                 |                                              |        |        |        |        |
| Section 2086                                         |          |                                                                               |                           |                 |                                              |        |        |        |        |
|                                                      | (160546) | 160546                                                                        | 160556                    | 160567          | 160578                                       | 160589 | 160600 | 160611 | 160622 |
| Candidatus Carsonella ruddii strain BT chromosome... | (160139) | GTTTTTTTTTTTGT-GAATTATTTAATAAAAAATATA--TTAAAACTATAAGGTTAAATAAAAAAACAGATTTTAA  |                           |                 |                                              |        |        |        |        |
| Candidatus Carsonella 135557 - 167442nt              | (24583)  | GTTTTTTTTTTTGT-GAATTATTTAATAAAAAATATA--TTAAAACTATAAGGTTAAATAAAAAAACAGATTTTAA  |                           |                 |                                              |        |        |        |        |
| SARS-CoV-2 Reference Genome NC_045512.2              | (22997)  | CCTTGTAA                                                                      | TGGTGTGAA                 | GGTTTAAAT       | TGTTACTTTCCCTTACAAATCATATGGTTTC--CAACCACTAAT | GGTGT  |        |        |        |
| Section 2087                                         |          |                                                                               |                           |                 |                                              |        |        |        |        |
|                                                      | (160623) | 160623                                                                        | 160633                    | 160644          | 160655                                       | 160666 | 160677 | 160688 | 160699 |
| Candidatus Carsonella ruddii strain BT chromosome... | (160213) | ATTTTTTTATT-ATTCAAA-TAATTTTTTTTCTTTTTTAATTGATAAAAAAATATTAATTATGGTGGT          | TTTGGTGAA                 |                 |                                              |        |        |        |        |
| Candidatus Carsonella 135557 - 167442nt              | (24657)  | ATTTTTTTATT-ATTCAAA-TAATTTTTTTTCTTTTTTAATTGATAAAAAAATATTAATTATGGTGGT          | TTTGGTGAA                 |                 |                                              |        |        |        |        |
| SARS-CoV-2 Reference Genome NC_045512.2              | (23072)  | GGTTACCA                                                                      | ACCATACAGAGTAGTAGTAC      | TTTCTTTTGAACTTC | TACATGCACCAAGCAAC--TGTTTGTGGACC              | TAA    |        |        |        |
| Section 2088                                         |          |                                                                               |                           |                 |                                              |        |        |        |        |
|                                                      | (160700) | 160700                                                                        | 160710                    | 160721          | 160732                                       | 160743 | 160754 | 160765 | 160776 |
| Candidatus Carsonella ruddii strain BT chromosome... | (160288) | CAATATAAAAAATTTAAATTTAATAAAAAAATTCATGTTTATTTTC--TGGT-----GGAATTAATTTATTTAAT   |                           |                 |                                              |        |        |        |        |
| Candidatus Carsonella 135557 - 167442nt              | (24732)  | CAATATAAAAAATTTAAATTTAATAAAAAAATTCATGTTTATTTTC--TGGT-----GGAATTAATTTATTTAAT   |                           |                 |                                              |        |        |        |        |
| SARS-CoV-2 Reference Genome NC_045512.2              | (23147)  | AAGTCTACTAA--TTTGGTTA                                                         | AAACAAATGTGTCAATTTCAACTTC | AATGGTTTAAACA   | GGCACAGGTGTTC                                | TACT   |        |        |        |

## SARS-CoV-2 &amp; Bakterien.apr

| Section 2089                                         |          |        |        |        |        |        |        |        |        |      |         |      |    |       |      |     |        |     |      |      |     |     |      |      |      |      |     |     |      |   |    |    |   |    |     |   |   |   |   |   |   |   |   |   |   |   |   |   |   |   |   |   |   |   |   |   |   |   |   |   |   |   |   |   |   |   |   |   |   |   |   |   |   |   |   |   |   |   |   |   |   |   |   |   |   |   |   |   |   |   |   |   |   |   |   |   |   |   |   |   |   |   |   |   |   |   |   |   |   |   |   |   |   |   |   |   |   |   |   |   |   |   |   |   |   |   |   |   |   |   |   |   |   |   |   |   |   |   |   |   |   |   |   |   |   |   |   |   |   |   |   |   |   |   |   |   |   |   |   |   |   |   |   |   |   |   |   |   |   |   |   |   |   |   |   |   |   |   |   |   |   |   |   |   |   |   |   |   |   |   |   |   |   |   |   |   |   |   |   |   |   |   |   |   |   |   |   |   |   |   |   |   |   |   |   |   |   |   |   |   |   |   |   |   |   |   |   |   |   |   |   |   |   |   |   |   |   |   |   |   |   |   |   |   |   |   |   |   |   |   |   |   |   |   |   |   |   |   |   |   |   |   |   |   |   |   |   |   |   |   |   |   |   |   |   |   |   |   |   |   |   |   |   |   |   |   |   |   |   |   |   |   |   |   |   |   |   |   |   |   |   |   |   |   |   |   |   |   |   |   |   |   |   |   |   |   |   |   |   |   |   |   |   |   |   |   |   |   |   |   |   |   |   |   |   |   |   |   |   |   |   |   |   |   |   |   |   |   |   |   |   |   |   |   |   |   |   |   |   |   |   |   |   |   |   |   |   |   |   |   |   |   |   |   |   |   |   |   |   |   |   |   |   |   |   |   |   |   |   |   |   |   |   |   |   |   |   |   |   |   |   |   |   |   |   |   |   |   |   |   |   |   |   |   |   |   |   |   |   |   |   |   |   |   |   |   |   |   |   |   |   |   |   |   |   |   |   |   |   |   |   |   |   |   |   |   |   |   |   |   |   |   |   |   |   |   |   |   |   |   |   |   |   |   |   |   |   |   |   |   |   |   |   |   |   |   |   |   |   |   |   |   |   |   |   |   |   |   |   |   |   |   |   |   |   |   |   |   |   |   |   |   |   |   |   |   |   |   |   |   |   |   |   |   |   |   |   |   |   |   |   |   |   |   |   |   |   |   |   |   |   |   |   |   |   |   |   |   |   |   |   |   |   |   |   |   |   |   |   |   |   |   |   |   |   |   |   |   |   |   |   |   |   |   |   |   |   |   |   |   |   |   |   |   |   |   |   |   |   |   |   |   |   |   |   |   |   |   |   |   |   |   |   |   |   |   |   |   |   |   |   |   |   |   |   |   |   |   |   |   |   |   |   |   |   |   |   |   |   |   |   |   |   |   |   |   |   |   |   |   |   |   |   |   |   |   |   |   |   |   |   |   |   |   |   |   |   |   |   |   |   |   |   |   |   |   |   |   |   |   |   |   |   |   |   |   |   |   |   |   |   |   |   |   |   |   |   |   |   |   |   |   |   |   |   |   |   |   |   |   |   |   |   |   |   |   |   |   |   |   |   |   |   |   |   |   |   |   |   |   |   |   |   |   |   |   |   |   |   |   |   |   |   |   |   |   |   |   |   |   |   |   |   |   |   |   |   |   |   |   |   |   |   |   |   |   |   |   |   |   |   |   |   |   |   |   |   |   |   |   |   |   |   |   |   |   |   |   |   |   |   |   |   |   |   |   |   |   |   |   |   |   |   |   |   |   |   |   |   |   |   |   |   |   |   |   |   |   |   |   |   |   |   |   |   |   |   |   |   |   |   |   |   |   |   |   |   |   |   |   |   |   |   |   |   |   |   |   |   |   |   |   |   |   |   |   |   |   |   |   |   |   |   |   |   |   |   |   |   |   |   |   |   |   |   |   |   |   |   |   |   |   |   |   |   |   |   |   |   |   |   |   |   |   |   |   |   |   |   |   |   |   |   |   |   |   |   |   |   |   |   |   |   |   |   |   |   |   |   |   |   |   |   |   |   |   |   |   |   |   |   |   |   |   |   |   |   |   |   |   |   |   |   |   |   |   |   |   |   |   |   |   |   |   |   |   |   |   |   |   |   |   |   |   |   |   |   |   |   |   |   |   |   |   |   |   |   |   |   |   |   |   |   |   |   |   |   |   |   |   |   |   |   |   |   |   |   |   |   |
|------------------------------------------------------|----------|--------|--------|--------|--------|--------|--------|--------|--------|------|---------|------|----|-------|------|-----|--------|-----|------|------|-----|-----|------|------|------|------|-----|-----|------|---|----|----|---|----|-----|---|---|---|---|---|---|---|---|---|---|---|---|---|---|---|---|---|---|---|---|---|---|---|---|---|---|---|---|---|---|---|---|---|---|---|---|---|---|---|---|---|---|---|---|---|---|---|---|---|---|---|---|---|---|---|---|---|---|---|---|---|---|---|---|---|---|---|---|---|---|---|---|---|---|---|---|---|---|---|---|---|---|---|---|---|---|---|---|---|---|---|---|---|---|---|---|---|---|---|---|---|---|---|---|---|---|---|---|---|---|---|---|---|---|---|---|---|---|---|---|---|---|---|---|---|---|---|---|---|---|---|---|---|---|---|---|---|---|---|---|---|---|---|---|---|---|---|---|---|---|---|---|---|---|---|---|---|---|---|---|---|---|---|---|---|---|---|---|---|---|---|---|---|---|---|---|---|---|---|---|---|---|---|---|---|---|---|---|---|---|---|---|---|---|---|---|---|---|---|---|---|---|---|---|---|---|---|---|---|---|---|---|---|---|---|---|---|---|---|---|---|---|---|---|---|---|---|---|---|---|---|---|---|---|---|---|---|---|---|---|---|---|---|---|---|---|---|---|---|---|---|---|---|---|---|---|---|---|---|---|---|---|---|---|---|---|---|---|---|---|---|---|---|---|---|---|---|---|---|---|---|---|---|---|---|---|---|---|---|---|---|---|---|---|---|---|---|---|---|---|---|---|---|---|---|---|---|---|---|---|---|---|---|---|---|---|---|---|---|---|---|---|---|---|---|---|---|---|---|---|---|---|---|---|---|---|---|---|---|---|---|---|---|---|---|---|---|---|---|---|---|---|---|---|---|---|---|---|---|---|---|---|---|---|---|---|---|---|---|---|---|---|---|---|---|---|---|---|---|---|---|---|---|---|---|---|---|---|---|---|---|---|---|---|---|---|---|---|---|---|---|---|---|---|---|---|---|---|---|---|---|---|---|---|---|---|---|---|---|---|---|---|---|---|---|---|---|---|---|---|---|---|---|---|---|---|---|---|---|---|---|---|---|---|---|---|---|---|---|---|---|---|---|---|---|---|---|---|---|---|---|---|---|---|---|---|---|---|---|---|---|---|---|---|---|---|---|---|---|---|---|---|---|---|---|---|---|---|---|---|---|---|---|---|---|---|---|---|---|---|---|---|---|---|---|---|---|---|---|---|---|---|---|---|---|---|---|---|---|---|---|---|---|---|---|---|---|---|---|---|---|---|---|---|---|---|---|---|---|---|---|---|---|---|---|---|---|---|---|---|---|---|---|---|---|---|---|---|---|---|---|---|---|---|---|---|---|---|---|---|---|---|---|---|---|---|---|---|---|---|---|---|---|---|---|---|---|---|---|---|---|---|---|---|---|---|---|---|---|---|---|---|---|---|---|---|---|---|---|---|---|---|---|---|---|---|---|---|---|---|---|---|---|---|---|---|---|---|---|---|---|---|---|---|---|---|---|---|---|---|---|---|---|---|---|---|---|---|---|---|---|---|---|---|---|---|---|---|---|---|---|---|---|---|---|---|---|---|---|---|---|---|---|---|---|---|---|---|---|---|---|---|---|---|---|---|---|---|---|---|---|---|---|---|---|---|---|---|---|---|---|---|---|---|---|---|---|---|---|---|---|---|---|---|---|---|---|---|---|---|---|---|---|---|---|---|---|---|---|---|---|---|---|---|---|---|---|---|---|---|---|---|---|---|---|---|---|---|---|---|---|---|---|---|---|---|---|---|---|---|---|---|---|---|---|---|---|---|---|---|---|---|---|---|---|---|---|---|---|---|---|---|---|---|---|---|---|---|---|---|---|---|---|---|---|---|---|---|---|---|---|---|---|---|---|---|---|---|---|---|---|---|---|---|---|---|---|---|---|---|---|---|---|---|---|---|---|---|---|---|---|---|---|---|---|---|---|---|---|---|---|---|---|---|---|---|---|---|---|---|---|---|---|---|---|---|---|---|---|---|---|---|---|---|---|---|---|---|---|---|---|---|---|---|---|---|---|---|---|---|---|---|---|---|---|---|---|---|---|---|---|---|---|---|---|---|---|---|---|---|---|---|---|---|---|---|---|---|---|---|---|---|---|---|---|---|---|---|---|---|---|---|---|---|---|---|---|---|---|---|---|---|---|---|---|---|---|---|---|---|---|---|---|---|
|                                                      | (160777) | 160777 | 160787 | 160798 | 160809 | 160820 | 160831 | 160842 | 160853 |      |         |      |    |       |      |     |        |     |      |      |     |     |      |      |      |      |     |     |      |   |    |    |   |    |     |   |   |   |   |   |   |   |   |   |   |   |   |   |   |   |   |   |   |   |   |   |   |   |   |   |   |   |   |   |   |   |   |   |   |   |   |   |   |   |   |   |   |   |   |   |   |   |   |   |   |   |   |   |   |   |   |   |   |   |   |   |   |   |   |   |   |   |   |   |   |   |   |   |   |   |   |   |   |   |   |   |   |   |   |   |   |   |   |   |   |   |   |   |   |   |   |   |   |   |   |   |   |   |   |   |   |   |   |   |   |   |   |   |   |   |   |   |   |   |   |   |   |   |   |   |   |   |   |   |   |   |   |   |   |   |   |   |   |   |   |   |   |   |   |   |   |   |   |   |   |   |   |   |   |   |   |   |   |   |   |   |   |   |   |   |   |   |   |   |   |   |   |   |   |   |   |   |   |   |   |   |   |   |   |   |   |   |   |   |   |   |   |   |   |   |   |   |   |   |   |   |   |   |   |   |   |   |   |   |   |   |   |   |   |   |   |   |   |   |   |   |   |   |   |   |   |   |   |   |   |   |   |   |   |   |   |   |   |   |   |   |   |   |   |   |   |   |   |   |   |   |   |   |   |   |   |   |   |   |   |   |   |   |   |   |   |   |   |   |   |   |   |   |   |   |   |   |   |   |   |   |   |   |   |   |   |   |   |   |   |   |   |   |   |   |   |   |   |   |   |   |   |   |   |   |   |   |   |   |   |   |   |   |   |   |   |   |   |   |   |   |   |   |   |   |   |   |   |   |   |   |   |   |   |   |   |   |   |   |   |   |   |   |   |   |   |   |   |   |   |   |   |   |   |   |   |   |   |   |   |   |   |   |   |   |   |   |   |   |   |   |   |   |   |   |   |   |   |   |   |   |   |   |   |   |   |   |   |   |   |   |   |   |   |   |   |   |   |   |   |   |   |   |   |   |   |   |   |   |   |   |   |   |   |   |   |   |   |   |   |   |   |   |   |   |   |   |   |   |   |   |   |   |   |   |   |   |   |   |   |   |   |   |   |   |   |   |   |   |   |   |   |   |   |   |   |   |   |   |   |   |   |   |   |   |   |   |   |   |   |   |   |   |   |   |   |   |   |   |   |   |   |   |   |   |   |   |   |   |   |   |   |   |   |   |   |   |   |   |   |   |   |   |   |   |   |   |   |   |   |   |   |   |   |   |   |   |   |   |   |   |   |   |   |   |   |   |   |   |   |   |   |   |   |   |   |   |   |   |   |   |   |   |   |   |   |   |   |   |   |   |   |   |   |   |   |   |   |   |   |   |   |   |   |   |   |   |   |   |   |   |   |   |   |   |   |   |   |   |   |   |   |   |   |   |   |   |   |   |   |   |   |   |   |   |   |   |   |   |   |   |   |   |   |   |   |   |   |   |   |   |   |   |   |   |   |   |   |   |   |   |   |   |   |   |   |   |   |   |   |   |   |   |   |   |   |   |   |   |   |   |   |   |   |   |   |   |   |   |   |   |   |   |   |   |   |   |   |   |   |   |   |   |   |   |   |   |   |   |   |   |   |   |   |   |   |   |   |   |   |   |   |   |   |   |   |   |   |   |   |   |   |   |   |   |   |   |   |   |   |   |   |   |   |   |   |   |   |   |   |   |   |   |   |   |   |   |   |   |   |   |   |   |   |   |   |   |   |   |   |   |   |   |   |   |   |   |   |   |   |   |   |   |   |   |   |   |   |   |   |   |   |   |   |   |   |   |   |   |   |   |   |   |   |   |   |   |   |   |   |   |   |   |   |   |   |   |   |   |   |   |   |   |   |   |   |   |   |   |   |   |   |   |   |   |   |   |   |   |   |   |   |   |   |   |   |   |   |   |   |   |   |   |   |   |   |   |   |   |   |   |   |   |   |   |   |   |   |   |   |   |   |   |   |   |   |   |   |   |   |   |   |   |   |   |   |   |   |   |   |   |   |   |   |   |   |   |   |   |   |   |   |   |   |   |   |   |   |   |   |   |   |   |   |   |   |   |   |   |   |   |   |   |   |   |   |   |   |   |   |   |   |   |   |   |   |   |   |   |   |   |   |   |   |   |   |   |   |   |   |   |   |   |   |   |   |   |   |   |   |   |   |   |   |   |   |   |   |   |   |   |   |   |   |   |   |   |   |   |   |   |   |   |   |
| Candidatus Carsonella ruddii strain BT chromosome... | (160357) | TA     | ---    | TAAAA  | AAAAA  | --     | TTCT   | TAT    | TTTT   | TCAA | ATTGTTT | TTTA | TA | TAGAT | TATT | TGT | AGTAGT | TTT | TAGA | ATAT | TAA | CA  | ATTA |      |      |      |     |     |      |   |    |    |   |    |     |   |   |   |   |   |   |   |   |   |   |   |   |   |   |   |   |   |   |   |   |   |   |   |   |   |   |   |   |   |   |   |   |   |   |   |   |   |   |   |   |   |   |   |   |   |   |   |   |   |   |   |   |   |   |   |   |   |   |   |   |   |   |   |   |   |   |   |   |   |   |   |   |   |   |   |   |   |   |   |   |   |   |   |   |   |   |   |   |   |   |   |   |   |   |   |   |   |   |   |   |   |   |   |   |   |   |   |   |   |   |   |   |   |   |   |   |   |   |   |   |   |   |   |   |   |   |   |   |   |   |   |   |   |   |   |   |   |   |   |   |   |   |   |   |   |   |   |   |   |   |   |   |   |   |   |   |   |   |   |   |   |   |   |   |   |   |   |   |   |   |   |   |   |   |   |   |   |   |   |   |   |   |   |   |   |   |   |   |   |   |   |   |   |   |   |   |   |   |   |   |   |   |   |   |   |   |   |   |   |   |   |   |   |   |   |   |   |   |   |   |   |   |   |   |   |   |   |   |   |   |   |   |   |   |   |   |   |   |   |   |   |   |   |   |   |   |   |   |   |   |   |   |   |   |   |   |   |   |   |   |   |   |   |   |   |   |   |   |   |   |   |   |   |   |   |   |   |   |   |   |   |   |   |   |   |   |   |   |   |   |   |   |   |   |   |   |   |   |   |   |   |   |   |   |   |   |   |   |   |   |   |   |   |   |   |   |   |   |   |   |   |   |   |   |   |   |   |   |   |   |   |   |   |   |   |   |   |   |   |   |   |   |   |   |   |   |   |   |   |   |   |   |   |   |   |   |   |   |   |   |   |   |   |   |   |   |   |   |   |   |   |   |   |   |   |   |   |   |   |   |   |   |   |   |   |   |   |   |   |   |   |   |   |   |   |   |   |   |   |   |   |   |   |   |   |   |   |   |   |   |   |   |   |   |   |   |   |   |   |   |   |   |   |   |   |   |   |   |   |   |   |   |   |   |   |   |   |   |   |   |   |   |   |   |   |   |   |   |   |   |   |   |   |   |   |   |   |   |   |   |   |   |   |   |   |   |   |   |   |   |   |   |   |   |   |   |   |   |   |   |   |   |   |   |   |   |   |   |   |   |   |   |   |   |   |   |   |   |   |   |   |   |   |   |   |   |   |   |   |   |   |   |   |   |   |   |   |   |   |   |   |   |   |   |   |   |   |   |   |   |   |   |   |   |   |   |   |   |   |   |   |   |   |   |   |   |   |   |   |   |   |   |   |   |   |   |   |   |   |   |   |   |   |   |   |   |   |   |   |   |   |   |   |   |   |   |   |   |   |   |   |   |   |   |   |   |   |   |   |   |   |   |   |   |   |   |   |   |   |   |   |   |   |   |   |   |   |   |   |   |   |   |   |   |   |   |   |   |   |   |   |   |   |   |   |   |   |   |   |   |   |   |   |   |   |   |   |   |   |   |   |   |   |   |   |   |   |   |   |   |   |   |   |   |   |   |   |   |   |   |   |   |   |   |   |   |   |   |   |   |   |   |   |   |   |   |   |   |   |   |   |   |   |   |   |   |   |   |   |   |   |   |   |   |   |   |   |   |   |   |   |   |   |   |   |   |   |   |   |   |   |   |   |   |   |   |   |   |   |   |   |   |   |   |   |   |   |   |   |   |   |   |   |   |   |   |   |   |   |   |   |   |   |   |   |   |   |   |   |   |   |   |   |   |   |   |   |   |   |   |   |   |   |   |   |   |   |   |   |   |   |   |   |   |   |   |   |   |   |   |   |   |   |   |   |   |   |   |   |   |   |   |   |   |   |   |   |   |   |   |   |   |   |   |   |   |   |   |   |   |   |   |   |   |   |   |   |   |   |   |   |   |   |   |   |   |   |   |   |   |   |   |   |   |   |   |   |   |   |   |   |   |   |   |   |   |   |   |   |   |   |   |   |   |   |   |   |   |   |   |   |   |   |   |   |   |   |   |   |   |   |   |   |   |   |   |   |   |   |   |   |   |   |   |   |   |   |   |   |   |   |   |   |   |   |   |   |   |   |   |   |   |   |   |   |   |   |   |   |   |   |   |   |   |   |   |   |   |   |   |   |   |   |   |   |   |   |   |   |   |   |   |   |   |   |   |   |   |   |   |   |   |   |   |
| Candidatus Carsonella 135557 - 167442nt              | (24801)  | TA     | ---    | TAAAA  | AAAAA  | --     | TTCT   | TAT    | TTTT   | TCAA | ATTGTTT | TTTA | TA | TAGAT | TATT | TGT | AGTAGT | TTT | TAGA | ATAT | TAA | CA  | ATTA |      |      |      |     |     |      |   |    |    |   |    |     |   |   |   |   |   |   |   |   |   |   |   |   |   |   |   |   |   |   |   |   |   |   |   |   |   |   |   |   |   |   |   |   |   |   |   |   |   |   |   |   |   |   |   |   |   |   |   |   |   |   |   |   |   |   |   |   |   |   |   |   |   |   |   |   |   |   |   |   |   |   |   |   |   |   |   |   |   |   |   |   |   |   |   |   |   |   |   |   |   |   |   |   |   |   |   |   |   |   |   |   |   |   |   |   |   |   |   |   |   |   |   |   |   |   |   |   |   |   |   |   |   |   |   |   |   |   |   |   |   |   |   |   |   |   |   |   |   |   |   |   |   |   |   |   |   |   |   |   |   |   |   |   |   |   |   |   |   |   |   |   |   |   |   |   |   |   |   |   |   |   |   |   |   |   |   |   |   |   |   |   |   |   |   |   |   |   |   |   |   |   |   |   |   |   |   |   |   |   |   |   |   |   |   |   |   |   |   |   |   |   |   |   |   |   |   |   |   |   |   |   |   |   |   |   |   |   |   |   |   |   |   |   |   |   |   |   |   |   |   |   |   |   |   |   |   |   |   |   |   |   |   |   |   |   |   |   |   |   |   |   |   |   |   |   |   |   |   |   |   |   |   |   |   |   |   |   |   |   |   |   |   |   |   |   |   |   |   |   |   |   |   |   |   |   |   |   |   |   |   |   |   |   |   |   |   |   |   |   |   |   |   |   |   |   |   |   |   |   |   |   |   |   |   |   |   |   |   |   |   |   |   |   |   |   |   |   |   |   |   |   |   |   |   |   |   |   |   |   |   |   |   |   |   |   |   |   |   |   |   |   |   |   |   |   |   |   |   |   |   |   |   |   |   |   |   |   |   |   |   |   |   |   |   |   |   |   |   |   |   |   |   |   |   |   |   |   |   |   |   |   |   |   |   |   |   |   |   |   |   |   |   |   |   |   |   |   |   |   |   |   |   |   |   |   |   |   |   |   |   |   |   |   |   |   |   |   |   |   |   |   |   |   |   |   |   |   |   |   |   |   |   |   |   |   |   |   |   |   |   |   |   |   |   |   |   |   |   |   |   |   |   |   |   |   |   |   |   |   |   |   |   |   |   |   |   |   |   |   |   |   |   |   |   |   |   |   |   |   |   |   |   |   |   |   |   |   |   |   |   |   |   |   |   |   |   |   |   |   |   |   |   |   |   |   |   |   |   |   |   |   |   |   |   |   |   |   |   |   |   |   |   |   |   |   |   |   |   |   |   |   |   |   |   |   |   |   |   |   |   |   |   |   |   |   |   |   |   |   |   |   |   |   |   |   |   |   |   |   |   |   |   |   |   |   |   |   |   |   |   |   |   |   |   |   |   |   |   |   |   |   |   |   |   |   |   |   |   |   |   |   |   |   |   |   |   |   |   |   |   |   |   |   |   |   |   |   |   |   |   |   |   |   |   |   |   |   |   |   |   |   |   |   |   |   |   |   |   |   |   |   |   |   |   |   |   |   |   |   |   |   |   |   |   |   |   |   |   |   |   |   |   |   |   |   |   |   |   |   |   |   |   |   |   |   |   |   |   |   |   |   |   |   |   |   |   |   |   |   |   |   |   |   |   |   |   |   |   |   |   |   |   |   |   |   |   |   |   |   |   |   |   |   |   |   |   |   |   |   |   |   |   |   |   |   |   |   |   |   |   |   |   |   |   |   |   |   |   |   |   |   |   |   |   |   |   |   |   |   |   |   |   |   |   |   |   |   |   |   |   |   |   |   |   |   |   |   |   |   |   |   |   |   |   |   |   |   |   |   |   |   |   |   |   |   |   |   |   |   |   |   |   |   |   |   |   |   |   |   |   |   |   |   |   |   |   |   |   |   |   |   |   |   |   |   |   |   |   |   |   |   |   |   |   |   |   |   |   |   |   |   |   |   |   |   |   |   |   |   |   |   |   |   |   |   |   |   |   |   |   |   |   |   |   |   |   |   |   |   |   |   |   |   |   |   |   |   |   |   |   |   |   |   |   |   |   |   |   |   |   |   |   |   |   |   |   |   |   |   |   |   |   |   |   |   |   |   |   |   |   |   |   |   |   |   |   |   |   |   |   |   |   |   |   |   |   |   |   |   |   |   |   |   |   |   |   |   |   |   |   |   |   |   |   |   |
| SARS-CoV-2 Reference Genome NC_045512.2              | (23222)  | GA     | GTC    | TAA    | C      | AAAAA  | GT     | TTCT   | GCC    | TTT  | C       | CAA  | CA | --    | A    | TTT | GGC    | A   | G    | AGA  | C   | ATT | GCT  | G    | TGAC | ACT  | ACT | GA  | TGCT | T | GT | GC | T | GT | GAT |   |   |   |   |   |   |   |   |   |   |   |   |   |   |   |   |   |   |   |   |   |   |   |   |   |   |   |   |   |   |   |   |   |   |   |   |   |   |   |   |   |   |   |   |   |   |   |   |   |   |   |   |   |   |   |   |   |   |   |   |   |   |   |   |   |   |   |   |   |   |   |   |   |   |   |   |   |   |   |   |   |   |   |   |   |   |   |   |   |   |   |   |   |   |   |   |   |   |   |   |   |   |   |   |   |   |   |   |   |   |   |   |   |   |   |   |   |   |   |   |   |   |   |   |   |   |   |   |   |   |   |   |   |   |   |   |   |   |   |   |   |   |   |   |   |   |   |   |   |   |   |   |   |   |   |   |   |   |   |   |   |   |   |   |   |   |   |   |   |   |   |   |   |   |   |   |   |   |   |   |   |   |   |   |   |   |   |   |   |   |   |   |   |   |   |   |   |   |   |   |   |   |   |   |   |   |   |   |   |   |   |   |   |   |   |   |   |   |   |   |   |   |   |   |   |   |   |   |   |   |   |   |   |   |   |   |   |   |   |   |   |   |   |   |   |   |   |   |   |   |   |   |   |   |   |   |   |   |   |   |   |   |   |   |   |   |   |   |   |   |   |   |   |   |   |   |   |   |   |   |   |   |   |   |   |   |   |   |   |   |   |   |   |   |   |   |   |   |   |   |   |   |   |   |   |   |   |   |   |   |   |   |   |   |   |   |   |   |   |   |   |   |   |   |   |   |   |   |   |   |   |   |   |   |   |   |   |   |   |   |   |   |   |   |   |   |   |   |   |   |   |   |   |   |   |   |   |   |   |   |   |   |   |   |   |   |   |   |   |   |   |   |   |   |   |   |   |   |   |   |   |   |   |   |   |   |   |   |   |   |   |   |   |   |   |   |   |   |   |   |   |   |   |   |   |   |   |   |   |   |   |   |   |   |   |   |   |   |   |   |   |   |   |   |   |   |   |   |   |   |   |   |   |   |   |   |   |   |   |   |   |   |   |   |   |   |   |   |   |   |   |   |   |   |   |   |   |   |   |   |   |   |   |   |   |   |   |   |   |   |   |   |   |   |   |   |   |   |   |   |   |   |   |   |   |   |   |   |   |   |   |   |   |   |   |   |   |   |   |   |   |   |   |   |   |   |   |   |   |   |   |   |   |   |   |   |   |   |   |   |   |   |   |   |   |   |   |   |   |   |   |   |   |   |   |   |   |   |   |   |   |   |   |   |   |   |   |   |   |   |   |   |   |   |   |   |   |   |   |   |   |   |   |   |   |   |   |   |   |   |   |   |   |   |   |   |   |   |   |   |   |   |   |   |   |   |   |   |   |   |   |   |   |   |   |   |   |   |   |   |   |   |   |   |   |   |   |   |   |   |   |   |   |   |   |   |   |   |   |   |   |   |   |   |   |   |   |   |   |   |   |   |   |   |   |   |   |   |   |   |   |   |   |   |   |   |   |   |   |   |   |   |   |   |   |   |   |   |   |   |   |   |   |   |   |   |   |   |   |   |   |   |   |   |   |   |   |   |   |   |   |   |   |   |   |   |   |   |   |   |   |   |   |   |   |   |   |   |   |   |   |   |   |   |   |   |   |   |   |   |   |   |   |   |   |   |   |   |   |   |   |   |   |   |   |   |   |   |   |   |   |   |   |   |   |   |   |   |   |   |   |   |   |   |   |   |   |   |   |   |   |   |   |   |   |   |   |   |   |   |   |   |   |   |   |   |   |   |   |   |   |   |   |   |   |   |   |   |   |   |   |   |   |   |   |   |   |   |   |   |   |   |   |   |   |   |   |   |   |   |   |   |   |   |   |   |   |   |   |   |   |   |   |   |   |   |   |   |   |   |   |   |   |   |   |   |   |   |   |   |   |   |   |   |   |   |   |   |   |   |   |   |   |   |   |   |   |   |   |   |   |   |   |   |   |   |   |   |   |   |   |   |   |   |   |   |   |   |   |   |   |   |   |   |   |   |   |   |   |   |   |   |   |   |   |   |   |   |   |   |   |   |   |   |   |   |   |   |   |   |   |   |   |   |   |   |   |   |   |   |   |   |   |   |   |   |   |   |   |   |   |   |   |   |   |   |   |   |   |   |   |   |   |   |   |   |   |   |   |   |   |   |   |   |
| Section 2090                                         |          |        |        |        |        |        |        |        |        |      |         |      |    |       |      |     |        |     |      |      |     |     |      |      |      |      |     |     |      |   |    |    |   |    |     |   |   |   |   |   |   |   |   |   |   |   |   |   |   |   |   |   |   |   |   |   |   |   |   |   |   |   |   |   |   |   |   |   |   |   |   |   |   |   |   |   |   |   |   |   |   |   |   |   |   |   |   |   |   |   |   |   |   |   |   |   |   |   |   |   |   |   |   |   |   |   |   |   |   |   |   |   |   |   |   |   |   |   |   |   |   |   |   |   |   |   |   |   |   |   |   |   |   |   |   |   |   |   |   |   |   |   |   |   |   |   |   |   |   |   |   |   |   |   |   |   |   |   |   |   |   |   |   |   |   |   |   |   |   |   |   |   |   |   |   |   |   |   |   |   |   |   |   |   |   |   |   |   |   |   |   |   |   |   |   |   |   |   |   |   |   |   |   |   |   |   |   |   |   |   |   |   |   |   |   |   |   |   |   |   |   |   |   |   |   |   |   |   |   |   |   |   |   |   |   |   |   |   |   |   |   |   |   |   |   |   |   |   |   |   |   |   |   |   |   |   |   |   |   |   |   |   |   |   |   |   |   |   |   |   |   |   |   |   |   |   |   |   |   |   |   |   |   |   |   |   |   |   |   |   |   |   |   |   |   |   |   |   |   |   |   |   |   |   |   |   |   |   |   |   |   |   |   |   |   |   |   |   |   |   |   |   |   |   |   |   |   |   |   |   |   |   |   |   |   |   |   |   |   |   |   |   |   |   |   |   |   |   |   |   |   |   |   |   |   |   |   |   |   |   |   |   |   |   |   |   |   |   |   |   |   |   |   |   |   |   |   |   |   |   |   |   |   |   |   |   |   |   |   |   |   |   |   |   |   |   |   |   |   |   |   |   |   |   |   |   |   |   |   |   |   |   |   |   |   |   |   |   |   |   |   |   |   |   |   |   |   |   |   |   |   |   |   |   |   |   |   |   |   |   |   |   |   |   |   |   |   |   |   |   |   |   |   |   |   |   |   |   |   |   |   |   |   |   |   |   |   |   |   |   |   |   |   |   |   |   |   |   |   |   |   |   |   |   |   |   |   |   |   |   |   |   |   |   |   |   |   |   |   |   |   |   |   |   |   |   |   |   |   |   |   |   |   |   |   |   |   |   |   |   |   |   |   |   |   |   |   |   |   |   |   |   |   |   |   |   |   |   |   |   |   |   |   |   |   |   |   |   |   |   |   |   |   |   |   |   |   |   |   |   |   |   |   |   |   |   |   |   |   |   |   |   |   |   |   |   |   |   |   |   |   |   |   |   |   |   |   |   |   |   |   |   |   |   |   |   |   |   |   |   |   |   |   |   |   |   |   |   |   |   |   |   |   |   |   |   |   |   |   |   |   |   |   |   |   |   |   |   |   |   |   |   |   |   |   |   |   |   |   |   |   |   |   |   |   |   |   |   |   |   |   |   |   |   |   |   |   |   |   |   |   |   |   |   |   |   |   |   |   |   |   |   |   |   |   |   |   |   |   |   |   |   |   |   |   |   |   |   |   |   |   |   |   |   |   |   |   |   |   |   |   |   |   |   |   |   |   |   |   |   |   |   |   |   |   |   |   |   |   |   |   |   |   |   |   |   |   |   |   |   |   |   |   |   |   |   |   |   |   |   |   |   |   |   |   |   |   |   |   |   |   |   |   |   |   |   |   |   |   |   |   |   |   |   |   |   |   |   |   |   |   |   |   |   |   |   |   |   |   |   |   |   |   |   |   |   |   |   |   |   |   |   |   |   |   |   |   |   |   |   |   |   |   |   |   |   |   |   |   |   |   |   |   |   |   |   |   |   |   |   |   |   |   |   |   |   |   |   |   |   |   |   |   |   |   |   |   |   |   |   |   |   |   |   |   |   |   |   |   |   |   |   |   |   |   |   |   |   |   |   |   |   |   |   |   |   |   |   |   |   |   |   |   |   |   |   |   |   |   |   |   |   |   |   |   |   |   |   |   |   |   |   |   |   |   |   |   |   |   |   |   |   |   |   |   |   |   |   |   |   |   |   |   |   |   |   |   |   |   |   |   |   |   |   |   |   |   |   |   |   |   |   |   |   |   |   |   |   |   |   |   |   |   |   |   |   |   |   |   |   |   |   |   |   |   |   |   |   |   |   |   |   |   |   |   |   |   |   |   |   |   |   |   |   |   |   |   |   |   |
|                                                      | (160854) | 160854 | 160864 | 160875 | 160886 | 160897 | 160908 | 160919 | 160930 |      |         |      |    |       |      |     |        |     |      |      |     |     |      |      |      |      |     |     |      |   |    |    |   |    |     |   |   |   |   |   |   |   |   |   |   |   |   |   |   |   |   |   |   |   |   |   |   |   |   |   |   |   |   |   |   |   |   |   |   |   |   |   |   |   |   |   |   |   |   |   |   |   |   |   |   |   |   |   |   |   |   |   |   |   |   |   |   |   |   |   |   |   |   |   |   |   |   |   |   |   |   |   |   |   |   |   |   |   |   |   |   |   |   |   |   |   |   |   |   |   |   |   |   |   |   |   |   |   |   |   |   |   |   |   |   |   |   |   |   |   |   |   |   |   |   |   |   |   |   |   |   |   |   |   |   |   |   |   |   |   |   |   |   |   |   |   |   |   |   |   |   |   |   |   |   |   |   |   |   |   |   |   |   |   |   |   |   |   |   |   |   |   |   |   |   |   |   |   |   |   |   |   |   |   |   |   |   |   |   |   |   |   |   |   |   |   |   |   |   |   |   |   |   |   |   |   |   |   |   |   |   |   |   |   |   |   |   |   |   |   |   |   |   |   |   |   |   |   |   |   |   |   |   |   |   |   |   |   |   |   |   |   |   |   |   |   |   |   |   |   |   |   |   |   |   |   |   |   |   |   |   |   |   |   |   |   |   |   |   |   |   |   |   |   |   |   |   |   |   |   |   |   |   |   |   |   |   |   |   |   |   |   |   |   |   |   |   |   |   |   |   |   |   |   |   |   |   |   |   |   |   |   |   |   |   |   |   |   |   |   |   |   |   |   |   |   |   |   |   |   |   |   |   |   |   |   |   |   |   |   |   |   |   |   |   |   |   |   |   |   |   |   |   |   |   |   |   |   |   |   |   |   |   |   |   |   |   |   |   |   |   |   |   |   |   |   |   |   |   |   |   |   |   |   |   |   |   |   |   |   |   |   |   |   |   |   |   |   |   |   |   |   |   |   |   |   |   |   |   |   |   |   |   |   |   |   |   |   |   |   |   |   |   |   |   |   |   |   |   |   |   |   |   |   |   |   |   |   |   |   |   |   |   |   |   |   |   |   |   |   |   |   |   |   |   |   |   |   |   |   |   |   |   |   |   |   |   |   |   |   |   |   |   |   |   |   |   |   |   |   |   |   |   |   |   |   |   |   |   |   |   |   |   |   |   |   |   |   |   |   |   |   |   |   |   |   |   |   |   |   |   |   |   |   |   |   |   |   |   |   |   |   |   |   |   |   |   |   |   |   |   |   |   |   |   |   |   |   |   |   |   |   |   |   |   |   |   |   |   |   |   |   |   |   |   |   |   |   |   |   |   |   |   |   |   |   |   |   |   |   |   |   |   |   |   |   |   |   |   |   |   |   |   |   |   |   |   |   |   |   |   |   |   |   |   |   |   |   |   |   |   |   |   |   |   |   |   |   |   |   |   |   |   |   |   |   |   |   |   |   |   |   |   |   |   |   |   |   |   |   |   |   |   |   |   |   |   |   |   |   |   |   |   |   |   |   |   |   |   |   |   |   |   |   |   |   |   |   |   |   |   |   |   |   |   |   |   |   |   |   |   |   |   |   |   |   |   |   |   |   |   |   |   |   |   |   |   |   |   |   |   |   |   |   |   |   |   |   |   |   |   |   |   |   |   |   |   |   |   |   |   |   |   |   |   |   |   |   |   |   |   |   |   |   |   |   |   |   |   |   |   |   |   |   |   |   |   |   |   |   |   |   |   |   |   |   |   |   |   |   |   |   |   |   |   |   |   |   |   |   |   |   |   |   |   |   |   |   |   |   |   |   |   |   |   |   |   |   |   |   |   |   |   |   |   |   |   |   |   |   |   |   |   |   |   |   |   |   |   |   |   |   |   |   |   |   |   |   |   |   |   |   |   |   |   |   |   |   |   |   |   |   |   |   |   |   |   |   |   |   |   |   |   |   |   |   |   |   |   |   |   |   |   |   |   |   |   |   |   |   |   |   |   |   |   |   |   |   |   |   |   |   |   |   |   |   |   |   |   |   |   |   |   |   |   |   |   |   |   |   |   |   |   |   |   |   |   |   |   |   |   |   |   |   |   |   |   |   |   |   |   |   |   |   |   |   |   |   |   |   |   |   |   |   |   |   |   |   |   |   |   |   |   |   |   |   |   |   |   |   |   |   |   |   |   |   |   |   |   |   |   |   |   |   |   |   |   |   |   |
| Candidatus Carsonella ruddii strain BT chromosome... | (160429) | AAAAA  | TAT    | TAAAAA | AAT    | GAT    | AA     | ATT    | TTT    | TAT  | ATA     | T    | AA | TG    | TTT  | TAT | TAA    | AT  | AAAA | TAT  | T   | TAA | G    | AAAA | AAT  | AAAA | A   | TAA | AT   |   |    |    |   |    |     |   |   |   |   |   |   |   |   |   |   |   |   |   |   |   |   |   |   |   |   |   |   |   |   |   |   |   |   |   |   |   |   |   |   |   |   |   |   |   |   |   |   |   |   |   |   |   |   |   |   |   |   |   |   |   |   |   |   |   |   |   |   |   |   |   |   |   |   |   |   |   |   |   |   |   |   |   |   |   |   |   |   |   |   |   |   |   |   |   |   |   |   |   |   |   |   |   |   |   |   |   |   |   |   |   |   |   |   |   |   |   |   |   |   |   |   |   |   |   |   |   |   |   |   |   |   |   |   |   |   |   |   |   |   |   |   |   |   |   |   |   |   |   |   |   |   |   |   |   |   |   |   |   |   |   |   |   |   |   |   |   |   |   |   |   |   |   |   |   |   |   |   |   |   |   |   |   |   |   |   |   |   |   |   |   |   |   |   |   |   |   |   |   |   |   |   |   |   |   |   |   |   |   |   |   |   |   |   |   |   |   |   |   |   |   |   |   |   |   |   |   |   |   |   |   |   |   |   |   |   |   |   |   |   |   |   |   |   |   |   |   |   |   |   |   |   |   |   |   |   |   |   |   |   |   |   |   |   |   |   |   |   |   |   |   |   |   |   |   |   |   |   |   |   |   |   |   |   |   |   |   |   |   |   |   |   |   |   |   |   |   |   |   |   |   |   |   |   |   |   |   |   |   |   |   |   |   |   |   |   |   |   |   |   |   |   |   |   |   |   |   |   |   |   |   |   |   |   |   |   |   |   |   |   |   |   |   |   |   |   |   |   |   |   |   |   |   |   |   |   |   |   |   |   |   |   |   |   |   |   |   |   |   |   |   |   |   |   |   |   |   |   |   |   |   |   |   |   |   |   |   |   |   |   |   |   |   |   |   |   |   |   |   |   |   |   |   |   |   |   |   |   |   |   |   |   |   |   |   |   |   |   |   |   |   |   |   |   |   |   |   |   |   |   |   |   |   |   |   |   |   |   |   |   |   |   |   |   |   |   |   |   |   |   |   |   |   |   |   |   |   |   |   |   |   |   |   |   |   |   |   |   |   |   |   |   |   |   |   |   |   |   |   |   |   |   |   |   |   |   |   |   |   |   |   |   |   |   |   |   |   |   |   |   |   |   |   |   |   |   |   |   |   |   |   |   |   |   |   |   |   |   |   |   |   |   |   |   |   |   |   |   |   |   |   |   |   |   |   |   |   |   |   |   |   |   |   |   |   |   |   |   |   |   |   |   |   |   |   |   |   |   |   |   |   |   |   |   |   |   |   |   |   |   |   |   |   |   |   |   |   |   |   |   |   |   |   |   |   |   |   |   |   |   |   |   |   |   |   |   |   |   |   |   |   |   |   |   |   |   |   |   |   |   |   |   |   |   |   |   |   |   |   |   |   |   |   |   |   |   |   |   |   |   |   |   |   |   |   |   |   |   |   |   |   |   |   |   |   |   |   |   |   |   |   |   |   |   |   |   |   |   |   |   |   |   |   |   |   |   |   |   |   |   |   |   |   |   |   |   |   |   |   |   |   |   |   |   |   |   |   |   |   |   |   |   |   |   |   |   |   |   |   |   |   |   |   |   |   |   |   |   |   |   |   |   |   |   |   |   |   |   |   |   |   |   |   |   |   |   |   |   |   |   |   |   |   |   |   |   |   |   |   |   |   |   |   |   |   |   |   |   |   |   |   |   |   |   |   |   |   |   |   |   |   |   |   |   |   |   |   |   |   |   |   |   |   |   |   |   |   |   |   |   |   |   |   |   |   |   |   |   |   |   |   |   |   |   |   |   |   |   |   |   |   |   |   |   |   |   |   |   |   |   |   |   |   |   |   |   |   |   |   |   |   |   |   |   |   |   |   |   |   |   |   |   |   |   |   |   |   |   |   |   |   |   |   |   |   |   |   |   |   |   |   |   |   |   |   |   |   |   |   |   |   |   |   |   |   |   |   |   |   |   |   |   |   |   |   |   |   |   |   |   |   |   |   |   |   |   |   |   |   |   |   |   |   |   |   |   |   |   |   |   |   |   |   |   |   |   |   |   |   |   |   |   |   |   |   |   |   |   |   |   |   |   |   |   |   |   |   |   |   |   |   |   |   |   |   |   |   |   |   |   |   |   |   |   |   |   |   |   |   |   |
| Candidatus Carsonella 135557 - 167442nt              | (24873)  | AAAAA  | TAT    | TAAAAA | AAT    | GAT    | AA     | ATT    | TTT    | TAT  | ATA     | T    | AA | TG    | TTT  | TAT | TAA    | AT  | AAAA | TAT  | T   | TAA | G    | AAAA | AAT  | AAAA | A   | TAA | AT   |   |    |    |   |    |     |   |   |   |   |   |   |   |   |   |   |   |   |   |   |   |   |   |   |   |   |   |   |   |   |   |   |   |   |   |   |   |   |   |   |   |   |   |   |   |   |   |   |   |   |   |   |   |   |   |   |   |   |   |   |   |   |   |   |   |   |   |   |   |   |   |   |   |   |   |   |   |   |   |   |   |   |   |   |   |   |   |   |   |   |   |   |   |   |   |   |   |   |   |   |   |   |   |   |   |   |   |   |   |   |   |   |   |   |   |   |   |   |   |   |   |   |   |   |   |   |   |   |   |   |   |   |   |   |   |   |   |   |   |   |   |   |   |   |   |   |   |   |   |   |   |   |   |   |   |   |   |   |   |   |   |   |   |   |   |   |   |   |   |   |   |   |   |   |   |   |   |   |   |   |   |   |   |   |   |   |   |   |   |   |   |   |   |   |   |   |   |   |   |   |   |   |   |   |   |   |   |   |   |   |   |   |   |   |   |   |   |   |   |   |   |   |   |   |   |   |   |   |   |   |   |   |   |   |   |   |   |   |   |   |   |   |   |   |   |   |   |   |   |   |   |   |   |   |   |   |   |   |   |   |   |   |   |   |   |   |   |   |   |   |   |   |   |   |   |   |   |   |   |   |   |   |   |   |   |   |   |   |   |   |   |   |   |   |   |   |   |   |   |   |   |   |   |   |   |   |   |   |   |   |   |   |   |   |   |   |   |   |   |   |   |   |   |   |   |   |   |   |   |   |   |   |   |   |   |   |   |   |   |   |   |   |   |   |   |   |   |   |   |   |   |   |   |   |   |   |   |   |   |   |   |   |   |   |   |   |   |   |   |   |   |   |   |   |   |   |   |   |   |   |   |   |   |   |   |   |   |   |   |   |   |   |   |   |   |   |   |   |   |   |   |   |   |   |   |   |   |   |   |   |   |   |   |   |   |   |   |   |   |   |   |   |   |   |   |   |   |   |   |   |   |   |   |   |   |   |   |   |   |   |   |   |   |   |   |   |   |   |   |   |   |   |   |   |   |   |   |   |   |   |   |   |   |   |   |   |   |   |   |   |   |   |   |   |   |   |   |   |   |   |   |   |   |   |   |   |   |   |   |   |   |   |   |   |   |   |   |   |   |   |   |   |   |   |   |   |   |   |   |   |   |   |   |   |   |   |   |   |   |   |   |   |   |   |   |   |   |   |   |   |   |   |   |   |   |   |   |   |   |   |   |   |   |   |   |   |   |   |   |   |   |   |   |   |   |   |   |   |   |   |   |   |   |   |   |   |   |   |   |   |   |   |   |   |   |   |   |   |   |   |   |   |   |   |   |   |   |   |   |   |   |   |   |   |   |   |   |   |   |   |   |   |   |   |   |   |   |   |   |   |   |   |   |   |   |   |   |   |   |   |   |   |   |   |   |   |   |   |   |   |   |   |   |   |   |   |   |   |   |   |   |   |   |   |   |   |   |   |   |   |   |   |   |   |   |   |   |   |   |   |   |   |   |   |   |   |   |   |   |   |   |   |   |   |   |   |   |   |   |   |   |   |   |   |   |   |   |   |   |   |   |   |   |   |   |   |   |   |   |   |   |   |   |   |   |   |   |   |   |   |   |   |   |   |   |   |   |   |   |   |   |   |   |   |   |   |   |   |   |   |   |   |   |   |   |   |   |   |   |   |   |   |   |   |   |   |   |   |   |   |   |   |   |   |   |   |   |   |   |   |   |   |   |   |   |   |   |   |   |   |   |   |   |   |   |   |   |   |   |   |   |   |   |   |   |   |   |   |   |   |   |   |   |   |   |   |   |   |   |   |   |   |   |   |   |   |   |   |   |   |   |   |   |   |   |   |   |   |   |   |   |   |   |   |   |   |   |   |   |   |   |   |   |   |   |   |   |   |   |   |   |   |   |   |   |   |   |   |   |   |   |   |   |   |   |   |   |   |   |   |   |   |   |   |   |   |   |   |   |   |   |   |   |   |   |   |   |   |   |   |   |   |   |   |   |   |   |   |   |   |   |   |   |   |   |   |   |   |   |   |   |   |   |   |   |   |   |   |   |   |   |   |   |   |   |   |   |   |   |   |   |   |   |   |   |   |   |   |   |   |   |   |   |   |   |   |   |   |   |   |   |   |   |   |   |   |   |   |   |   |
| SARS-CoV-2 Reference Genome NC_045512.2              | (23297)  | CC     | A      | C      | A      | G      | A      | C      | A      | CTT  | G       | A    | G  | A     | T    | C   | T      | T   | G    | A    | C   | A   | T    | T    | A    | C    | AT  | G   | T    | T | C  | AT | G | T  | T   | T | T | T | T | T | T | T | T | T | T | T | T | T | T | T | T | T | T | T | T | T | T | T | T | T | T | T | T | T | T | T | T | T | T | T | T | T | T | T | T | T | T | T | T | T | T | T | T | T | T | T | T | T | T | T | T | T | T | T | T | T | T | T | T | T | T | T | T | T | T | T | T | T | T | T | T | T | T | T | T | T | T | T | T | T | T | T | T | T | T | T | T | T | T | T | T | T | T | T | T | T | T | T | T | T | T | T | T | T | T | T | T | T | T | T | T | T | T | T | T | T | T | T | T | T | T | T | T | T | T | T | T | T | T | T | T | T | T | T | T | T | T | T | T | T | T | T | T | T | T | T | T | T | T | T | T | T | T | T | T | T | T | T | T | T | T | T | T | T | T | T | T | T | T | T | T | T | T | T | T | T | T | T | T | T | T | T | T | T | T | T | T | T | T | T | T | T | T | T | T | T | T | T | T | T | T | T | T | T | T | T | T | T | T | T | T | T | T | T | T | T | T | T | T | T | T | T | T | T | T | T | T | T | T | T | T | T | T | T | T | T | T | T | T | T | T | T | T | T | T | T | T | T | T | T | T | T | T | T | T | T | T | T | T | T | T | T | T | T | T | T | T | T | T | T | T | T | T | T | T | T | T | T | T | T | T | T | T | T | T | T | T | T | T | T | T | T | T | T | T | T | T | T | T | T | T | T | T | T | T | T | T | T | T | T | T | T | T | T | T | T | T | T | T | T | T | T | T | T | T | T | T | T | T | T | T | T | T | T | T | T | T | T | T | T | T | T | T | T | T | T | T | T | T | T | T | T | T | T | T | T | T | T | T | T | T | T | T | T | T | T | T | T | T | T | T | T | T | T | T | T | T | T | T | T | T | T | T | T | T | T | T | T | T | T | T | T | T | T | T | T | T | T | T | T | T | T | T | T | T | T | T | T | T | T | T | T | T | T | T | T | T | T | T | T | T | T | T | T | T | T | T | T | T | T | T | T | T | T | T | T | T | T | T | T | T | T | T | T | T | T | T | T | T | T | T | T | T | T | T | T | T | T | T | T | T | T | T | T | T | T | T | T | T | T | T | T | T | T | T | T | T | T | T | T | T | T | T | T | T | T | T | T | T | T | T | T | T | T | T | T | T | T | T | T | T | T | T | T | T | T | T | T | T | T | T | T | T | T | T | T | T | T | T | T | T | T | T | T | T | T | T | T | T | T | T | T | T | T | T | T | T | T | T | T | T | T | T | T | T | T | T | T | T | T | T | T | T | T | T | T | T | T | T | T | T | T | T | T | T | T | T | T | T | T | T | T | T | T | T | T | T | T | T | T | T | T | T | T | T | T | T | T | T | T | T | T | T | T | T | T | T | T | T | T | T | T | T | T | T | T | T | T | T | T | T | T | T | T | T | T | T | T | T | T | T | T | T | T | T | T | T | T | T | T | T | T | T | T | T | T | T | T | T | T | T | T | T | T | T | T | T | T | T | T | T | T | T | T | T | T | T | T | T | T | T | T | T | T | T | T | T | T | T | T | T | T | T | T | T | T | T | T | T | T | T | T | T | T | T | T | T | T | T | T | T | T | T | T | T | T | T | T | T | T | T | T | T | T | T | T | T | T | T | T | T | T | T | T | T | T | T | T | T | T | T | T | T | T | T | T | T | T | T | T | T | T | T | T | T | T | T | T | T | T | T | T | T | T | T | T | T | T | T | T | T | T | T | T | T | T | T | T | T | T | T | T | T | T | T | T | T | T | T | T | T | T | T | T | T | T | T | T | T | T | T | T | T | T | T | T | T | T | T | T | T | T | T | T | T | T | T | T | T | T | T | T | T | T | T | T | T | T | T | T | T | T | T | T | T | T | T | T | T | T | T | T | T | T | T | T | T | T | T | T | T | T | T | T | T | T | T | T | T | T | T | T | T | T | T | T | T | T | T | T | T | T | T | T | T | T | T | T | T | T | T | T | T | T | T | T | T | T | T | T | T | T | T | T | T | T | T | T | T | T | T | T | T | T | T | T | T | T | T | T | T | T | T | T | T | T | T | T | T | T | T | T | T | T | T | T | T | T | T | T | T | T | T | T | T | T | T | T | T | T | T | T | T | T | T | T | T | T | T | T | T | T | T | T | T | T | T | T | T |

## SARS-CoV-2 &amp; Bakterien.apr

|                                                      |          |                                                                                 |        |        |        |        |        |        |        |
|------------------------------------------------------|----------|---------------------------------------------------------------------------------|--------|--------|--------|--------|--------|--------|--------|
| Section 2095                                         |          |                                                                                 |        |        |        |        |        |        |        |
|                                                      | (161239) | 161239                                                                          | 161249 | 161260 | 161271 | 161282 | 161293 | 161304 | 161315 |
| Candidatus Carsonella ruddii strain BT chromosome... | (160807) | TTTACGAAGAAATAACTATACCTTTATTTATAAAATTATTCAAATTTATTATATTTCAGGACAAATACCTAAATTTTAT |        |        |        |        |        |        |        |
| Candidatus Carsonella 135557 - 167442nt              | (25251)  | TTTACGAAGAAATAACTATACCTTTATTTATAAAATTATTCAAATTTATTATATTTCAGGACAAATACCTAAATTTTAT |        |        |        |        |        |        |        |
| SARS-CoV-2 Reference Genome NC_045512.2              | (23659)  | TGGT-GCAGAAA-----ATTTCAGTTGCTTA--C-----TCTAATAA-ACTCTATT---GCCATACCACAAATTTTAC  |        |        |        |        |        |        |        |
| Section 2096                                         |          |                                                                                 |        |        |        |        |        |        |        |
|                                                      | (161316) | 161316                                                                          | 161326 | 161337 | 161348 | 161359 | 161370 | 161381 | 161392 |
| Candidatus Carsonella ruddii strain BT chromosome... | (160884) | AATAATTTATTTAAATAGAAAAAATTAATTCTTTTTTAATTCCAACCTCAGAAGTAATTTTAAATTGTTTATCTTT    |        |        |        |        |        |        |        |
| Candidatus Carsonella 135557 - 167442nt              | (25328)  | AATAATTTATTTAAATAGAAAAAATTAATTCTTTTTTAATTCCAACCTCAGAAGTAATTTTAAATTGTTTATCTTT    |        |        |        |        |        |        |        |
| SARS-CoV-2 Reference Genome NC_045512.2              | (23719)  | TATTAGTGTG--TTACCACAGAAATTCACCAGTGTCTATGACCAAGACATCAGTAG--ATTGTACAAATGTACATTGT  |        |        |        |        |        |        |        |
| Section 2097                                         |          |                                                                                 |        |        |        |        |        |        |        |
|                                                      | (161393) | 161393                                                                          | 161403 | 161414 | 161425 | 161436 | 161447 | 161458 | 161469 |
| Candidatus Carsonella ruddii strain BT chromosome... | (160961) | TTTTATAAAAAATAATTTTTTACCAATAAAATTAATATGTAATAGTTATTGTTTTAGAAAAAGAAATAGGTAATCTTT  |        |        |        |        |        |        |        |
| Candidatus Carsonella 135557 - 167442nt              | (25405)  | TTTTATAAAAAATAATTTTTTACCAATAAAATTAATATGTAATAGTTATTGTTTTAGAAAAAGAAATAGGTAATCTTT  |        |        |        |        |        |        |        |
| SARS-CoV-2 Reference Genome NC_045512.2              | (23792)  | GGTGATTCAACTGAATG-----CAGCAAATCTTTTGTGTGCAATA-TGGCAGTTTTTGTAACAATAAACCCTGCTT    |        |        |        |        |        |        |        |
| Section 2098                                         |          |                                                                                 |        |        |        |        |        |        |        |
|                                                      | (161470) | 161470                                                                          | 161480 | 161491 | 161502 | 161513 | 161524 | 161535 | 161546 |
| Candidatus Carsonella ruddii strain BT chromosome... | (161038) | GTAAAAATAATTTAGGTATAAAAAGACAAACAACAATTTAAAAAATTGAAATTTTTCAATTTTTTAAAAAAAATGAA   |        |        |        |        |        |        |        |
| Candidatus Carsonella 135557 - 167442nt              | (25482)  | GTAAAAATAATTTAGGTATAAAAAGACAAACAACAATTTAAAAAATTGAAATTTTTCAATTTTTTAAAAAAAATGAA   |        |        |        |        |        |        |        |
| SARS-CoV-2 Reference Genome NC_045512.2              | (23862)  | -TAACTGGAAATAGCTGTGAAACAAGACAAACAACCCAGAAAGTTTGTGCAACAGTCAACACAAATTTACAAAACACC  |        |        |        |        |        |        |        |
| Section 2099                                         |          |                                                                                 |        |        |        |        |        |        |        |
|                                                      | (161547) | 161547                                                                          | 161557 | 161568 | 161579 | 161590 | 161601 | 161612 | 161623 |
| Candidatus Carsonella ruddii strain BT chromosome... | (161115) | TCCTTTTGAAGATTTTATTCTATATGTTCTAATAATAATTTATATATTA--AAATTATTAGAAATAAAATTTAGAATA  |        |        |        |        |        |        |        |
| Candidatus Carsonella 135557 - 167442nt              | (25559)  | TCCTTTTGAAGATTTTATTCTATATGTTCTAATAATAATTTATATATTA--AAATTATTAGAAATAAAATTTAGAATA  |        |        |        |        |        |        |        |
| SARS-CoV-2 Reference Genome NC_045512.2              | (23938)  | ACCAATTAAAGATTTTGGT-----GTTTAAATTCTTCACAAATATTA--CCAGATCCATCAAAACCAAGCAAGAGGTC  |        |        |        |        |        |        |        |
| Section 2100                                         |          |                                                                                 |        |        |        |        |        |        |        |
|                                                      | (161624) | 161624                                                                          | 161634 | 161645 | 161656 | 161667 | 161678 | 161689 | 161700 |
| Candidatus Carsonella ruddii strain BT chromosome... | (161190) | ATAAAATTAAATTCT---TATGAATTAAATTTAAATTTCTTTTAAACCTTTGATTTTGAAATTTGGAG-TTATATTG   |        |        |        |        |        |        |        |
| Candidatus Carsonella 135557 - 167442nt              | (25634)  | ATAAAATTAAATTCT---TATGAATTAAATTTAAATTTCTTTTAAACCTTTGATTTTGAAATTTGGAG-TTATATTG   |        |        |        |        |        |        |        |
| SARS-CoV-2 Reference Genome NC_045512.2              | (24010)  | ATTTATTGAAATCTACTTTTCACAAAGTGACACTTGACAGATGCTGGCTTCATCAAACAAATATGGTGATTGCCTTG   |        |        |        |        |        |        |        |

## SARS-CoV-2 &amp; Bakterien.apr

|                                                      |          |          | Section 2101                                                               |                                  |             |                    |               |        |                |                                  |
|------------------------------------------------------|----------|----------|----------------------------------------------------------------------------|----------------------------------|-------------|--------------------|---------------|--------|----------------|----------------------------------|
|                                                      |          |          | 161701                                                                     | 161711                           | 161722      | 161733             | 161744        | 161755 | 161766         | 161777                           |
| Candidatus Carsonella ruddii strain BT chromosome... | (161701) | (161263) | ATAATCTTG                                                                  | GATAGAAATTTCTTCTTTGTCGTTATGTTTAA | ----        | TAAATCTTTTAATATTTT | TTTAA         | AAAAA  | AAAAA          | AAAAA                            |
| Candidatus Carsonella 135557 - 167442nt              | (25707)  | (25707)  | ATAATCTTG                                                                  | GATAGAAATTTCTTCTTTGTCGTTATGTTTAA | ----        | TAAATCTTTTAATATTTT | TTTAA         | AAAAA  | AAAAA          | AAAAA                            |
| SARS-CoV-2 Reference Genome NC_045512.2              | (24087)  | (24087)  | GTGATATGCTGCTAGAGACC                                                       | TCATTGTGTCACAA                   | AGTTTAA     | CGGCC              | TACTGTTTT     | GCCACC | TTTGCTCA       | CAGAT                            |
|                                                      |          |          | Section 2102                                                               |                                  |             |                    |               |        |                |                                  |
|                                                      |          |          | 161778                                                                     | 161788                           | 161799      | 161810             | 161821        | 161832 | 161843         | 161854                           |
| Candidatus Carsonella ruddii strain BT chromosome... | (161778) | (161335) | AAAATATTTATTTAATAAATGCTTCCTGCTCCCTTTAGGAAGATTAAATATATATTATTTTATAC          | TTTGA                            | ATT         | TTTGA              | ATT           | TTTGA  | ATT            | TTTGA                            |
| Candidatus Carsonella 135557 - 167442nt              | (25779)  | (25779)  | AAAATATTTATTTAATAAATGCTTCCTGCTCCCTTTAGGAAGATTAAATATATATTATTTTATAC          | TTTGA                            | ATT         | TTTGA              | ATT           | TTTGA  | ATT            | TTTGA                            |
| SARS-CoV-2 Reference Genome NC_045512.2              | (24164)  | (24164)  | GAAATGATTGCTCAATACA                                                        | CTTC                             | TGCA        | CTGTAG             | CGGGTACA      | AATC   | ACTTCTGGTTGGAC | CTTTGGT                          |
|                                                      |          |          | Section 2103                                                               |                                  |             |                    |               |        |                |                                  |
|                                                      |          |          | 161855                                                                     | 161865                           | 161876      | 161887             | 161898        | 161909 | 161920         | 161931                           |
| Candidatus Carsonella ruddii strain BT chromosome... | (161855) | (161412) | AGTAATGTTTTATTAAATTCCTAAAAAATTAATAAAATTTTAACCGATCTGTGAAATGGTAAACAAACAAGAA  | AAAA                             | AAAA        | AAAA               | AAAA          | AAAA   | AAAA           | AAAA                             |
| Candidatus Carsonella 135557 - 167442nt              | (25856)  | (25856)  | AGTAATGTTTTATTAAATTCCTAAAAAATTAATAAAATTTTAACCGATCTGTGAAATGGTAAACAAACAAGAA  | AAAA                             | AAAA        | AAAA               | AAAA          | AAAA   | AAAA           | AAAA                             |
| SARS-CoV-2 Reference Genome NC_045512.2              | (24230)  | (24230)  | GCAGGTGCTGCATTACAA                                                         | -----                            | ATA         | CCATTTG            | -----         | CTATGC | AAATGG         | -----CTTATAGGTT                  |
|                                                      |          |          | Section 2104                                                               |                                  |             |                    |               |        |                |                                  |
|                                                      |          |          | 161932                                                                     | 161942                           | 161953      | 161964             | 161975        | 161986 | 161997         | 162008                           |
| Candidatus Carsonella ruddii strain BT chromosome... | (161932) | (161489) | TTAGAATCTTGTGCTTATGCATAGGGGTTCAAAATCCCTGTTCGGTAAAAAAATATATGAAAAATTTTAAATTA | AAAA                             | AAAA        | AAAA               | AAAA          | AAAA   | AAAA           | AAAA                             |
| Candidatus Carsonella 135557 - 167442nt              | (25933)  | (25933)  | TTAGAATCTTGTGCTTATGCATAGGGGTTCAAAATCCCTGTTCGGTAAAAAAATATATGAAAAATTTTAAATTA | AAAA                             | AAAA        | AAAA               | AAAA          | AAAA   | AAAA           | AAAA                             |
| SARS-CoV-2 Reference Genome NC_045512.2              | (24280)  | (24280)  | TAA                                                                        | TGGTATTG                         | GAGTTACA    | CAGAAATGTT         | -----         | C      | TCTATGAGAACCA  | AAAAATGATTGCAACCAATTTAAT--A      |
|                                                      |          |          | Section 2105                                                               |                                  |             |                    |               |        |                |                                  |
|                                                      |          |          | 162009                                                                     | 162019                           | 162030      | 162041             | 162052        | 162063 | 162074         | 162085                           |
| Candidatus Carsonella ruddii strain BT chromosome... | (162009) | (161566) | AATTAGATATGGTATTAATAATGAGAAATTTTATTATTAATTAATAAATACTAAAAAAGAAAAATATTTT     | TTT                              | TTT         | TTT                | TTT           | TTT    | TTT            | TTT                              |
| Candidatus Carsonella 135557 - 167442nt              | (26010)  | (26010)  | AATTAGATATGGTATTAATAATGAGAAATTTTATTATTAATTAATAAATACTAAAAAAGAAAAATATTTT     | TTT                              | TTT         | TTT                | TTT           | TTT    | TTT            | TTT                              |
| SARS-CoV-2 Reference Genome NC_045512.2              | (24348)  | (24348)  | -G                                                                         | TGCTAT                           | TGGCAAAATTC | AGACTCAC           | TTTTCTTCCACAG | ---CAA | GTGC           | ACTTGGAAAACTTCAAGATGTGGTC-       |
|                                                      |          |          | Section 2106                                                               |                                  |             |                    |               |        |                |                                  |
|                                                      |          |          | 162086                                                                     | 162096                           | 162107      | 162118             | 162129        | 162140 | 162151         | 162162                           |
| Candidatus Carsonella ruddii strain BT chromosome... | (162086) | (161643) | TTATAATAATTATTATAAATAACAATTTTACATA                                         | ---                              | TAA         | TATAAATTA          | AAAAA         | AATTTT | TTTTTA         | TGCAAAAAT                        |
| Candidatus Carsonella 135557 - 167442nt              | (26087)  | (26087)  | TTATAATAATTATTATAAATAACAATTTTACATA                                         | ---                              | TAA         | TATAAATTA          | AAAAA         | AATTTT | TTTTTA         | TGCAAAAAT                        |
| SARS-CoV-2 Reference Genome NC_045512.2              | (24419)  | (24419)  | -----                                                                      | AA                               | CCAAAATGC   | ACAA               | GCTTTAAACA    | CGCTGT | TAAACA         | CTTAGCTCCAAATTTTGG----TGCAA----T |

## SARS-CoV-2 &amp; Bakterien.apr

|                                                      |          |                                                                                  |        |        |        |        |        |        |               |
|------------------------------------------------------|----------|----------------------------------------------------------------------------------|--------|--------|--------|--------|--------|--------|---------------|
|                                                      |          | Section 2107                                                                     |        |        |        |        |        |        |               |
|                                                      |          | (162163)                                                                         | 162163 | 162173 | 162184 | 162195 | 162206 | 162217 | 162228 162239 |
| Candidatus Carsonella ruddii strain BT chromosome... | (161718) | ATTTATTTTAAAATATATTAATATGTGG-TGGAGATGGAAGTATTATAAATAGTTTAAATATTTTATAATAG         |        |        |        |        |        |        |               |
| Candidatus Carsonella 135557 - 167442nt              | (26162)  | ATTTATTTTAAAATATATTAATATGTGG-TGGAGATGGAAGTATTATAAATAGTTTAAATATTTTATAATAG         |        |        |        |        |        |        |               |
| SARS-CoV-2 Reference Genome NC_045512.2              | (24481)  | TTCAGTGTGTTTAAATGATATCCTTTCACGTC TTGACAAAGTTGAGGCTGAAGTGCAAAATGATAGGTTGATCAG     |        |        |        |        |        |        |               |
|                                                      |          | Section 2108                                                                     |        |        |        |        |        |        |               |
|                                                      |          | (162240)                                                                         | 162240 | 162250 | 162261 | 162272 | 162283 | 162294 | 162305 162316 |
| Candidatus Carsonella ruddii strain BT chromosome... | (161794) | AAAAATATTTATTAAAAATTTAAATTTTGTAATTTAGGATTTTAAACAAATAATAATATTAAAAAAAATTTT---      |        |        |        |        |        |        |               |
| Candidatus Carsonella 135557 - 167442nt              | (26238)  | AAAAATATTTATTAAAAATTTAAATTTTGTAATTTAGGATTTTAAACAAATAATAATATTAAAAAAAATTTT---      |        |        |        |        |        |        |               |
| SARS-CoV-2 Reference Genome NC_045512.2              | (24558)  | GCAGAC-----TTCAAAGTTTGACAGCATATGTGACTCAACAAATAATTAAGAGCTGCAGAAATCAGAGCT          |        |        |        |        |        |        |               |
|                                                      |          | Section 2109                                                                     |        |        |        |        |        |        |               |
|                                                      |          | (162317)                                                                         | 162317 | 162327 | 162338 | 162349 | 162360 | 162371 | 162382 162393 |
| Candidatus Carsonella ruddii strain BT chromosome... | (161868) | TATTAAAATCTTG-TATTGGTAATATATTAA--TTTCTAGTAAAAATATTAATTTTTCTTTATTATTTTTGAATGAA    |        |        |        |        |        |        |               |
| Candidatus Carsonella 135557 - 167442nt              | (26312)  | TATTAAAATCTTG-TATTGGTAATATATTAA--TTTCTAGTAAAAATATTAATTTTTCTTTATTATTTTTGAATGAA    |        |        |        |        |        |        |               |
| SARS-CoV-2 Reference Genome NC_045512.2              | (24623)  | TCTGCTAATCTTGCTGCTACTAAATGTCAGAGTGTGTACTTGGACAAATCAAAGAGTTGATTTTGTGGAAAGGG       |        |        |        |        |        |        |               |
|                                                      |          | Section 2110                                                                     |        |        |        |        |        |        |               |
|                                                      |          | (162394)                                                                         | 162394 | 162404 | 162415 | 162426 | 162437 | 162448 | 162459 162470 |
| Candidatus Carsonella ruddii strain BT chromosome... | (161942) | ATATTAAATAAAAATAAAAGTTTAAAAATAAAATTAATAAAACAAATTTTCTTATCTGATTTAATTTTAATATCATT    |        |        |        |        |        |        |               |
| Candidatus Carsonella 135557 - 167442nt              | (26386)  | ATATTAAATAAAAATAAAAGTTTAAAAATAAAATTAATAAAACAAATTTTCTTATCTGATTTAATTTTAATATCATT    |        |        |        |        |        |        |               |
| SARS-CoV-2 Reference Genome NC_045512.2              | (24700)  | CTATCATCTTATATGTCCTTCCCCTCAGTCAGCACTCATGGTGTAGTCTTCTTGCATGTGACTTA--TGTCCCTGCA    |        |        |        |        |        |        |               |
|                                                      |          | Section 2111                                                                     |        |        |        |        |        |        |               |
|                                                      |          | (162471)                                                                         | 162471 | 162481 | 162492 | 162503 | 162514 | 162525 | 162536 162547 |
| Candidatus Carsonella ruddii strain BT chromosome... | (162019) | AGATAATGGAT---CAACAGGATATATGTTTTCTAATAAT---AAAATACAATTTAAAGGTAATTATTTAACATTTT    |        |        |        |        |        |        |               |
| Candidatus Carsonella 135557 - 167442nt              | (26463)  | AGATAATGGAT---CAACAGGATATATGTTTTCTAATAAT---AAAATACAATTTAAAGGTAATTATTTAACATTTT    |        |        |        |        |        |        |               |
| SARS-CoV-2 Reference Genome NC_045512.2              | (24775)  | AGAAAAGAACTTCACAACTGCTCCTGCCATTTGTCTATGATGGAAGGACACACTTTCTCTGTGAAGGTGTC---TTTG   |        |        |        |        |        |        |               |
|                                                      |          | Section 2112                                                                     |        |        |        |        |        |        |               |
|                                                      |          | (162548)                                                                         | 162548 | 162558 | 162569 | 162580 | 162591 | 162602 | 162613 162624 |
| Candidatus Carsonella ruddii strain BT chromosome... | (162090) | TATTAAATAAGATCTCATACAAATAAAAAATTTATTTTTTTTTTTAAAAAATAAAAAATTAAAAATTAAATTCATAAATA |        |        |        |        |        |        |               |
| Candidatus Carsonella 135557 - 167442nt              | (26534)  | TATTAAATAAGATCTCATACAAATAAAAAATTTATTTTTTTTTTTAAAAAATAAAAAATTAAAAATTAAATTCATAAATA |        |        |        |        |        |        |               |
| SARS-CoV-2 Reference Genome NC_045512.2              | (24849)  | TTTCAAATGCGACACACTGGTTTGTAAACAAAGGAAATTTTATGAAACCACAATCATTACTACAGACAACAATTT      |        |        |        |        |        |        |               |



## SARS-CoV-2 &amp; Bakterien.apr

| Section 2113                                         |          |            |         |          |             |         |            |            |           |
|------------------------------------------------------|----------|------------|---------|----------|-------------|---------|------------|------------|-----------|
|                                                      | (162625) | 162625     | 162635  | 162646   | 162657      | 162668  | 162679     | 162690     | 162701    |
| Candidatus Carsonella ruddii strain BT chromosome... | (162167) | AAATTTAATT | TTAGATT | TATGTT   | CAAAAAATTTT | TTTAA   | AACAATATTT | TAATAATTTT | TATTAAAAA |
| Candidatus Carsonella 135557 - 167442nt              | (26611)  | AAATTTAATT | TTAGATT | TATGTT   | CAAAAAATTTT | TTTAA   | AACAATATTT | TAATAATTTT | TATTAAAAA |
| SARS-CoV-2 Reference Genome NC_045512.2              | (24926)  | GTG        | TCTGG   | TAAC     | TG          | ATGTT   | GT         | AA         | TAGGAA    |
| Section 2114                                         |          |            |         |          |             |         |            |            |           |
|                                                      | (162702) | 162702     | 162712  | 162723   | 162734      | 162745  | 162756     | 162767     | 162778    |
| Candidatus Carsonella ruddii strain BT chromosome... | (162744) | TTTTTTAA   | --      | ATGATTTT | AAAAAT      | AAAAAT  | TATGATAAA  | ATAAAAT    | AAAAAAGTT |
| Candidatus Carsonella 135557 - 167442nt              | (26688)  | TTTTTTAA   | --      | ATGATTTT | AAAAAT      | AAAAAT  | TATGATAAA  | ATAAAAT    | AAAAAAGTT |
| SARS-CoV-2 Reference Genome NC_045512.2              | (25001)  | TCATTC     | AA      | GG       | AG          | GA      | TTA        | GATA       | AA        |
| Section 2115                                         |          |            |         |          |             |         |            |            |           |
|                                                      | (162779) | 162779     | 162789  | 162800   | 162811      | 162822  | 162833     | 162844     | 162855    |
| Candidatus Carsonella ruddii strain BT chromosome... | (162319) | AAAATATTT  | TATAAT  | TTTTTAAT | TAAAA       | TAGGAAT | AC         | AAAAA      | AAATTT    |
| Candidatus Carsonella 135557 - 167442nt              | (26763)  | AAAATATTT  | TATAAT  | TTTTTAAT | TAAAA       | TAGGAAT | AC         | AAAAA      | AAATTT    |
| SARS-CoV-2 Reference Genome NC_045512.2              | (25077)  | TTAAT      | GCT     | CAGT     | T           | G       | TAAAC      | ATT        | C         |
| Section 2116                                         |          |            |         |          |             |         |            |            |           |
|                                                      | (162856) | 162856     | 162866  | 162877   | 162888      | 162899  | 162910     | 162921     | 162932    |
| Candidatus Carsonella ruddii strain BT chromosome... | (162394) | ATTGTTT    | TAATAA  | ACTTGG   | ATAAA       | --      | ATTATTA    | AAAAA      | ATTTT     |
| Candidatus Carsonella 135557 - 167442nt              | (26838)  | ATTGTTT    | TAATAA  | ACTTGG   | ATAAA       | --      | ATTATTA    | AAAAA      | ATTTT     |
| SARS-CoV-2 Reference Genome NC_045512.2              | (25154)  | ATC        | GAT     | CTCC     | AA          | GA      | ACTTGG     | AA         | GTA       |
| Section 2117                                         |          |            |         |          |             |         |            |            |           |
|                                                      | (162933) | 162933     | 162943  | 162954   | 162965      | 162976  | 162987     | 162998     | 163009    |
| Candidatus Carsonella ruddii strain BT chromosome... | (162469) | TTTTAT     | CTGG    | AATAAT   | AAAAAT      | ATTTT   | TTTAA      | TATTAAT    | AAAAAT    |
| Candidatus Carsonella 135557 - 167442nt              | (26913)  | TTTTAT     | CTGG    | AATAAT   | AAAAAT      | ATTTT   | TTTAA      | TATTAAT    | AAAAAT    |
| SARS-CoV-2 Reference Genome NC_045512.2              | (25221)  | TTATA      | G       | CTGG     | CT          | T       | GATT       | GCC        | ATA       |
| Section 2118                                         |          |            |         |          |             |         |            |            |           |
|                                                      | (163010) | 163010     | 163020  | 163031   | 163042      | 163053  | 163064     | 163075     | 163086    |
| Candidatus Carsonella ruddii strain BT chromosome... | (162546) | TTTAATAT   | TTT     | TAAAAAT  | TTT         | TAAAAAT | TTGAAAA    | AAAAAT     | TAA       |
| Candidatus Carsonella 135557 - 167442nt              | (26990)  | TTTAATAT   | TTT     | TAAAAAT  | TTT         | TAAAAAT | TTGAAAA    | AAAAAT     | TAA       |
| SARS-CoV-2 Reference Genome NC_045512.2              | (25289)  | T          | ----    | G        | T           | C       | T          | AA         | GGGC      |

## SARS-CoV-2 &amp; Bakterien.apr

|                                                      |          |                                                                                   |        |        |        |        |        |        |        |
|------------------------------------------------------|----------|-----------------------------------------------------------------------------------|--------|--------|--------|--------|--------|--------|--------|
| Section 2119                                         |          |                                                                                   |        |        |        |        |        |        |        |
|                                                      | (163087) | 163087                                                                            | 163097 | 163108 | 163119 | 163130 | 163141 | 163152 | 163163 |
| Candidatus Carsonella ruddii strain BT chromosome... | (162623) | TTATATATATAAATTTTATAAATAAATAATTAACAACTTATTAAATTATA-ATGACAA-CTAAATAAATTT-AATAAA    |        |        |        |        |        |        |        |
| Candidatus Carsonella 135557 - 167442nt              | (27067)  | TTATATATATAAATTTTATAAATAAATAATTAACAACTTATTAAATTATA-ATGACAA-CTAAATAAATTT-AATAAA    |        |        |        |        |        |        |        |
| SARS-CoV-2 Reference Genome NC_045512.2              | (25361)  | GGAGTCAA-----TTACATTACACA--TAAACGAACCTTATGGATTGTTTATGAGAACTTCACTCAATTGGAACTGT     |        |        |        |        |        |        |        |
| Section 2120                                         |          |                                                                                   |        |        |        |        |        |        |        |
|                                                      | (163164) | 163164                                                                            | 163174 | 163185 | 163196 | 163207 | 163218 | 163229 | 163240 |
| Candidatus Carsonella ruddii strain BT chromosome... | (162697) | AATTATATAAATATAAATGAA-TCTATATCACCAATCAAAAAATATTTTTTTTATAAATTTGAATATTATTAGATAAATAT |        |        |        |        |        |        |        |
| Candidatus Carsonella 135557 - 167442nt              | (27141)  | AATTATATAAATATAAATGAA-TCTATATCACCAATCAAAAAATATTTTTTTTATAAATTTGAATATTATTAGATAAATAT |        |        |        |        |        |        |        |
| SARS-CoV-2 Reference Genome NC_045512.2              | (25431)  | AACTTTGAAACAAGGTGAATCAAGGATGCTACTCCTTCAGATTTTTGTTTCGCGCTACTGCAACGATACCGATACAG     |        |        |        |        |        |        |        |
| Section 2121                                         |          |                                                                                   |        |        |        |        |        |        |        |
|                                                      | (163241) | 163241                                                                            | 163251 | 163262 | 163273 | 163284 | 163295 | 163306 | 163317 |
| Candidatus Carsonella ruddii strain BT chromosome... | (162773) | CCTTTTCTCCAAAAAATTAATTTACTTCTTAGACCAATAACAAGGTTTTTTTATAAAAAAAGATTCAATAAAAACAAAA   |        |        |        |        |        |        |        |
| Candidatus Carsonella 135557 - 167442nt              | (27217)  | CCTTTTCTCCAAAAAATTAATTTACTTCTTAGACCAATAACAAGGTTTTTTTATAAAAAAAGATTCAATAAAAACAAAA   |        |        |        |        |        |        |        |
| SARS-CoV-2 Reference Genome NC_045512.2              | (25508)  | CCTCACTCCCTTTCGGATTGGCTTA-TTGTGGCGTTGCACTTCTTGCCTGCTTTTTCAGAGCGCTTC-----CAAAA     |        |        |        |        |        |        |        |
| Section 2122                                         |          |                                                                                   |        |        |        |        |        |        |        |
|                                                      | (163318) | 163318                                                                            | 163328 | 163339 | 163350 | 163361 | 163372 | 163383 | 163394 |
| Candidatus Carsonella ruddii strain BT chromosome... | (162850) | TTTATTAATCCAAACTAAAGATAAAATTTT-TTTTATTTAAAAAATTTTGTAAATATTATAGGAAATAAATTTTTTTTCC  |        |        |        |        |        |        |        |
| Candidatus Carsonella 135557 - 167442nt              | (27294)  | TTTATTAATCCAAACTAAAGATAAAATTTT-TTTTATTTAAAAAATTTTGTAAATATTATAGGAAATAAATTTTTTTTCC  |        |        |        |        |        |        |        |
| SARS-CoV-2 Reference Genome NC_045512.2              | (25577)  | TC-ATAACCCTCAAAGAGATGGCACTA-----GCACTCTCCAAGGTGTTCACTTTGTTTG                      |        |        |        |        |        |        |        |
| Section 2123                                         |          |                                                                                   |        |        |        |        |        |        |        |
|                                                      | (163395) | 163395                                                                            | 163405 | 163416 | 163427 | 163438 | 163449 | 163460 | 163471 |
| Candidatus Carsonella ruddii strain BT chromosome... | (162927) | AAATAACTAAAAATAATTTTATAAAAAAATAATTATTCATTTAATTTTATAAATTTTATTAAATTTATTTTTTTTAAA    |        |        |        |        |        |        |        |
| Candidatus Carsonella 135557 - 167442nt              | (27371)  | AAATAACTAAAAATAATTTTATAAAAAAATAATTATTCATTTAATTTTATAAATTTTATTAAATTTATTTTTTTTAAA    |        |        |        |        |        |        |        |
| SARS-CoV-2 Reference Genome NC_045512.2              | (25636)  | AACTTGC-----TGTGTGTTGTTTGTAAAGTTTACFACACCTTTTGCTCGTTGCTGCTGGCCTT--G-----AAG       |        |        |        |        |        |        |        |
| Section 2124                                         |          |                                                                                   |        |        |        |        |        |        |        |
|                                                      | (163472) | 163472                                                                            | 163482 | 163493 | 163504 | 163515 | 163526 | 163537 | 163548 |
| Candidatus Carsonella ruddii strain BT chromosome... | (163004) | AATTTTATAAACAAATTTATTAAAGTTTTTAAAGATAAAATTACAATTTACACAATCTCCATAAAAAAATAAACATA     |        |        |        |        |        |        |        |
| Candidatus Carsonella 135557 - 167442nt              | (27448)  | AATTTTATAAACAAATTTATTAAAGTTTTTAAAGATAAAATTACAATTTACACAATCTCCATAAAAAAATAAACATA     |        |        |        |        |        |        |        |
| SARS-CoV-2 Reference Genome NC_045512.2              | (25700)  | CCCCTTTCTCTATCTTTAT-----GCTTTAGTCTACTTCTTGCAAGAGTATAAATTTGTA-AGAAATAAATGAGG       |        |        |        |        |        |        |        |

|                                                      |          |                                                                                   |        |        |        |        |        |               |
|------------------------------------------------------|----------|-----------------------------------------------------------------------------------|--------|--------|--------|--------|--------|---------------|
|                                                      |          | Section 1215                                                                      |        |        |        |        |        |               |
|                                                      | (163549) | 163549                                                                            | 163559 | 163570 | 163581 | 163592 | 163603 | 163614 163625 |
| Candidatus Carsonella ruddii strain BT chromosome... | (163081) | ATGTTTTTTTATTAAAAATTAAATAATTTATTTTAAATAAACCATTTGTGTAAAAATTAATTTTTTATTATTATTATATAA |        |        |        |        |        |               |
| Candidatus Carsonella 135557 - 167442nt              | (27525)  | ATGTTTTTTTATTAAAAATTAAATAATTTATTTTAAATAAACCATTTGTGTAAAAATTAATTTTTTATTATTATTATATAA |        |        |        |        |        |               |
| SARS-CoV-2 Reference Genome NC_045512.2              | (25771)  | CTTTGGCTTTGCTGGAA-----A-----TGCCGTTCCAAAAAACCCATT-----ACT-TTATGATGCCAACATTTTCTTT  |        |        |        |        |        |               |
|                                                      |          | Section 1216                                                                      |        |        |        |        |        |               |
|                                                      | (163626) | 163626                                                                            | 163636 | 163647 | 163658 | 163669 | 163680 | 163691 163702 |
| Candidatus Carsonella ruddii strain BT chromosome... | (163158) | TAAAGTAAAAAAATTATTTTACTTAGTATTTTATTTTCTAAAAATAAATTGTAAAAAGAATTGGTGAATTAAATTAT     |        |        |        |        |        |               |
| Candidatus Carsonella 135557 - 167442nt              | (27602)  | TAAAGTAAAAAAATTATTTTACTTAGTATTTTATTTTCTAAAAATAAATTGTAAAAAGAATTGGTGAATTAAATTAT     |        |        |        |        |        |               |
| SARS-CoV-2 Reference Genome NC_045512.2              | (25835)  | GCTGGCATACTAATTGT--TACG-ACATTGTATAC-CTTACAAATAG---TGTAAC-----TTCTTC AATTG-TCAT    |        |        |        |        |        |               |
|                                                      |          | Section 1217                                                                      |        |        |        |        |        |               |
|                                                      | (163703) | 163703                                                                            | 163713 | 163724 | 163735 | 163746 | 163757 | 163768 163779 |
| Candidatus Carsonella ruddii strain BT chromosome... | (163235) | TAATTTTTTTTATAATGTATACAAGTATTATTTTAAAAAACATAAACTTAAATATCTATTAAAAATGTTTATTCTCTT    |        |        |        |        |        |               |
| Candidatus Carsonella 135557 - 167442nt              | (27679)  | TAATTTTTTTTATAATGTATACAAGTATTATTTTAAAAAACATAAACTTAAATATCTATTAAAAATGTTTATTCTCTT    |        |        |        |        |        |               |
| SARS-CoV-2 Reference Genome NC_045512.2              | (25899)  | TACTTCAGGTG-ATGGCAC-ACAAGTCCATTTT-----CTGAACATGACTACCAAGATTGGTGGTTATAC            |        |        |        |        |        |               |
|                                                      |          | Section 1218                                                                      |        |        |        |        |        |               |
|                                                      | (163780) | 163780                                                                            | 163790 | 163801 | 163812 | 163823 | 163834 | 163845 163856 |
| Candidatus Carsonella ruddii strain BT chromosome... | (163312) | TTATTTTTTATAAATTT--ATTAAAAATATTTTTTTTATTAAGTTGAATAATATATTTTGTGTTTGTAAAAAACATT-T   |        |        |        |        |        |               |
| Candidatus Carsonella 135557 - 167442nt              | (27756)  | TTATTTTTTATAAATTT--ATTAAAAATATTTTTTTTATTAAGTTGAATAATATATTTTGTGTTTGTAAAAAACATT-T   |        |        |        |        |        |               |
| SARS-CoV-2 Reference Genome NC_045512.2              | (25962)  | TGAAAAATGGGAATCTGGAGTAAAAACGCTGTTGTTGTATTACACAGTTACTTCACCTTCAGACTATTACCAAGCTGTACT |        |        |        |        |        |               |
|                                                      |          | Section 1219                                                                      |        |        |        |        |        |               |
|                                                      | (163857) | 163857                                                                            | 163867 | 163878 | 163889 | 163900 | 163911 | 163922 163933 |
| Candidatus Carsonella ruddii strain BT chromosome... | (163386) | C--CTTTATTTTATTAATAAAATTT-TATAAATCATTTTATTTTCTTGT-TATTATATAAATATTATTAACAAGAAT     |        |        |        |        |        |               |
| Candidatus Carsonella 135557 - 167442nt              | (27830)  | C--CTTTATTTTATTAATAAAATTT-TATAAATCATTTTATTTTCTTGT-TATTATATAAATATTATTAACAAGAAT     |        |        |        |        |        |               |
| SARS-CoV-2 Reference Genome NC_045512.2              | (26039)  | CAACTCAATTGAGTACAGACCTGGTGTGTGAACATGTTACCTTCTTCATCTACAATAAAATGTTTGAT-----GAGC     |        |        |        |        |        |               |
|                                                      |          | Section 12130                                                                     |        |        |        |        |        |               |
|                                                      | (163934) | 163934                                                                            | 163944 | 163955 | 163966 | 163977 | 163988 | 163999 164010 |
| Candidatus Carsonella ruddii strain BT chromosome... | (163459) | CAGTTAAATAAATATTATAATTATATATTTTAAACAATATACA-TAAAAATTAAATCATTTTTTTATCAAAAAAACCC    |        |        |        |        |        |               |
| Candidatus Carsonella 135557 - 167442nt              | (27903)  | CAGTTAAATAAATATTATAATTATATATTTTAAACAATATACA-TAAAAATTAAATCATTTTTTTATCAAAAAAACCC    |        |        |        |        |        |               |
| SARS-CoV-2 Reference Genome NC_045512.2              | (26111)  | CTG--AAGAACATGTCCAATTAC-----ACAATCGACGGTTCATCCGGAAGTTGTTAATCCAGTAAATGGAACCA       |        |        |        |        |        |               |

## SARS-CoV-2 &amp; Bakterien.apr

|                                                      |          |          | Section 2131 |         |         |         |         |          |           |               |
|------------------------------------------------------|----------|----------|--------------|---------|---------|---------|---------|----------|-----------|---------------|
|                                                      |          |          | 164011       | 164021  | 164032  | 164043  | 164054  | 164065   | 164076    | 164087        |
| Candidatus Carsonella ruddii strain BT chromosome... | (164011) | (163535) | ATTTT        | TATAAT  | TAAAAT  | AGAAAG  | CAACCA  | AGCAT    | CTAAT     | ATTGCTGAATGGT |
| Candidatus Carsonella 135557 - 167442nt              | (27979)  |          | ATTTT        | TATAAT  | TAAAAT  | AGAAAG  | CAACCA  | AGCAT    | CTAAT     | ATTGCTGAATGGT |
| SARS-CoV-2 Reference Genome NC_045512.2              | (26179)  |          | ATTTT        | --ATG   | ATGAA   | CCGACG  | ACGACTA | CTAGCG   | TGCCTT    | TGTAAGCA      |
|                                                      |          |          | Section 2132 |         |         |         |         |          |           |               |
|                                                      |          |          | 164088       | 164098  | 164109  | 164120  | 164131  | 164142   | 164153    | 164164        |
| Candidatus Carsonella ruddii strain BT chromosome... | (164088) | (163612) | TTCAT        | ATCTTT  | TACATA  | ATGAAT  | CTAAAT  | CATT     | CCCTTT    | TCTAGGAT      |
| Candidatus Carsonella 135557 - 167442nt              | (28056)  |          | TTCAT        | ATCTTT  | TACATA  | ATGAAT  | CTAAAT  | CATT     | CCCTTT    | TCTAGGAT      |
| SARS-CoV-2 Reference Genome NC_045512.2              | (26251)  |          | T-CAT        | TCGTTT  | CGGAAG  | AGACAGG | TACGTT  | AAATAG   | TTAAATAG  | CGTACTT       |
|                                                      |          |          | Section 2133 |         |         |         |         |          |           |               |
|                                                      |          |          | 164165       | 164175  | 164186  | 164197  | 164208  | 164219   | 164230    | 164241        |
| Candidatus Carsonella ruddii strain BT chromosome... | (164165) | (163689) | AAAAA        | TAAACAT | TATAGA  | ATATAA  | ACGACT  | CATAC    | TTCCAC    | CTGAATA       |
| Candidatus Carsonella 135557 - 167442nt              | (28133)  |          | AAAAA        | TAAACAT | TATAGA  | ATATAA  | ACGACT  | CATAC    | TTCCAC    | CTGAATA       |
| SARS-CoV-2 Reference Genome NC_045512.2              | (26325)  |          | GCTAG        | TTACA   | -----   | CTAGC   | CATC    | CTTAC    | TGCGCTTCG | ATTGTGTG      |
|                                                      |          |          | Section 2134 |         |         |         |         |          |           |               |
|                                                      |          |          | 164242       | 164252  | 164263  | 164274  | 164285  | 164296   | 164307    | 164318        |
| Candidatus Carsonella ruddii strain BT chromosome... | (164242) | (163766) | AATTT        | TAGCATT | TATGAG  | CTATAA  | TATAGA  | ATTTT    | ACAAAAC   | CTAAAAAT      |
| Candidatus Carsonella 135557 - 167442nt              | (28210)  |          | AATTT        | TAGCATT | TATGAG  | CTATAA  | TATAGA  | ATTTT    | ACAAAAC   | CTAAAAAT      |
| SARS-CoV-2 Reference Genome NC_045512.2              | (26387)  |          | ACGTG        | AGTC    | TTGT-AA | -----   | AA--CC  | TTCTTT   | -----     | TTACGTT       |
|                                                      |          |          | Section 2135 |         |         |         |         |          |           |               |
|                                                      |          |          | 164319       | 164329  | 164340  | 164351  | 164362  | 164373   | 164384    | 164395        |
| Candidatus Carsonella ruddii strain BT chromosome... | (164319) | (163843) | TTTAT        | TTTTTA  | AGAAAA  | TTATT   | TTTTAT  | ACCAT    | GTATAT    | TAAAAGCT      |
| Candidatus Carsonella 135557 - 167442nt              | (28287)  |          | TTTAT        | TTTTTA  | AGAAAA  | TTATT   | TTTTAT  | ACCAT    | GTATAT    | TAAAAGCT      |
| SARS-CoV-2 Reference Genome NC_045512.2              | (26441)  |          | ATTC         | TTCTAG  | AGTTCC  | TGATCT  | CTTGGT  | CTAAACGA | ACTAAA    | ---TAT        |
|                                                      |          |          | Section 2136 |         |         |         |         |          |           |               |
|                                                      |          |          | 164396       | 164406  | 164417  | 164428  | 164439  | 164450   | 164461    | 164472        |
| Candidatus Carsonella ruddii strain BT chromosome... | (164396) | (163916) | AAATA        | AGAATG  | AAAAAT  | TCTAC   | CTGTAA  | TAAAAC   | CTTAAT    | TACTTCA       |
| Candidatus Carsonella 135557 - 167442nt              | (28360)  |          | AAATA        | AGAATG  | AAAAAT  | TCTAC   | CTGTAA  | TAAAAC   | CTTAAT    | TACTTCA       |
| SARS-CoV-2 Reference Genome NC_045512.2              | (26515)  |          | TTT          | TAGCC   | ATG     | GCAG    | ATTCCA  | AGG      | GTAC      | TATTACCG      |

## SARS-CoV-2 &amp; Bakterien.apr

|                                                      |          |              |                                                                                 |        |        |        |        |        |               |
|------------------------------------------------------|----------|--------------|---------------------------------------------------------------------------------|--------|--------|--------|--------|--------|---------------|
|                                                      |          | Section 2137 |                                                                                 |        |        |        |        |        |               |
|                                                      |          | (164473)     | 164473                                                                          | 164483 | 164494 | 164505 | 164516 | 164527 | 164538 164549 |
| Candidatus Carsonella ruddii strain BT chromosome... | (163993) |              | TTTATGTGGAGATAATCCAGTTGTTTCAACATCTAAAAAACATGCTTTTCATATATTTATTTTATATTAAATTT      |        |        |        |        |        |               |
| Candidatus Carsonella 135557 - 167442nt              | (28437)  |              | TTTATGTGGAGATAATCCAGTTGTTTCAACATCTAAAAAACATGCTTTTCATATATTTATTTTATATTAAATTT      |        |        |        |        |        |               |
| SARS-CoV-2 Reference Genome NC_045512.2              | (26587)  |              | -T-----AG-TAAT--AG--GTTTCCTATTCCTTACATGGATTGTCCTC-TACAATT-TGCCATATGCCAACAGG     |        |        |        |        |        |               |
|                                                      |          | Section 2138 |                                                                                 |        |        |        |        |        |               |
|                                                      |          | (164550)     | 164550                                                                          | 164560 | 164571 | 164582 | 164593 | 164604 | 164615 164626 |
| Candidatus Carsonella ruddii strain BT chromosome... | (164070) |              | AAAATATTTTTTTTAAAGATAAACAAATTTATATTTTATTTTACACAGGAAATTAACATTTCATTTATTTTTT       |        |        |        |        |        |               |
| Candidatus Carsonella 135557 - 167442nt              | (28514)  |              | AAAATATTTTTTTTAAAGATAAACAAATTTATATTTTATTTTACACAGGAAATTAACATTTCATTTATTTTTT       |        |        |        |        |        |               |
| SARS-CoV-2 Reference Genome NC_045512.2              | (26649)  |              | AATAGGTTTTTGTATATATTAAGTTAATTT-TCCCTGGCTGTTAT---GGCCAGTAACTTTAGC--TTGTTTTGT     |        |        |        |        |        |               |
|                                                      |          | Section 2139 |                                                                                 |        |        |        |        |        |               |
|                                                      |          | (164627)     | 164627                                                                          | 164637 | 164648 | 164659 | 164670 | 164681 | 164692 164703 |
| Candidatus Carsonella ruddii strain BT chromosome... | (164147) |              | TTTTATTAAAAAAATTTTTTTTAAAAAAATTTTATTATAAATTTAAAAATATAATTTAAATAATTTATTTAAAAAT    |        |        |        |        |        |               |
| Candidatus Carsonella 135557 - 167442nt              | (28591)  |              | TTTTATTAAAAAAATTTTTTTTAAAAAAATTTTATTATAAATTTAAAAATATAATTTAAATAATTTATTTAAAAAT    |        |        |        |        |        |               |
| SARS-CoV-2 Reference Genome NC_045512.2              | (26720)  |              | GCTT-----GCTGCTGTTTACAGAAATAAATTGGATCACCGGTGGAAATGCTATCGCAATGGCTTGTCTTG-TA      |        |        |        |        |        |               |
|                                                      |          | Section 2140 |                                                                                 |        |        |        |        |        |               |
|                                                      |          | (164704)     | 164704                                                                          | 164714 | 164725 | 164736 | 164747 | 164758 | 164769 164780 |
| Candidatus Carsonella ruddii strain BT chromosome... | (164224) |              | ATTTTATTATTTTATC-GATATTTTTTTATTATAAAAAAAATTTTTTTTATATTTTTTAAATAAAAATTCAAATATTT  |        |        |        |        |        |               |
| Candidatus Carsonella 135557 - 167442nt              | (28668)  |              | ATTTTATTATTTTATC-GATATTTTTTTATTATAAAAAAAATTTTTTTTATATTTTTTAAATAAAAATTCAAATATTT  |        |        |        |        |        |               |
| SARS-CoV-2 Reference Genome NC_045512.2              | (26787)  |              | GGCTTGATGTGGCTCAGTACATTCAATTGCTTCTTTTCAGACTGTTTGCGCGTACGCGTTCCATGTGGT-CA-----TT |        |        |        |        |        |               |
|                                                      |          | Section 2141 |                                                                                 |        |        |        |        |        |               |
|                                                      |          | (164781)     | 164781                                                                          | 164791 | 164802 | 164813 | 164824 | 164835 | 164846 164857 |
| Candidatus Carsonella ruddii strain BT chromosome... | (164300) |              | TTTTATTTAAAAATTTTTTTTATTAAATATAAAACCTAAATAATAAATTTTATGTTTTTAAAAATGAAAAATATT     |        |        |        |        |        |               |
| Candidatus Carsonella 135557 - 167442nt              | (28744)  |              | TTTTATTTAAAAATTTTTTTTATTAAATATAAAACCTAAATAATAAATTTTATGTTTTTAAAAATGAAAAATATT     |        |        |        |        |        |               |
| SARS-CoV-2 Reference Genome NC_045512.2              | (26858)  |              | CAATCCAGAAACTACATTCTTCACGTCGCCA--CTCCATGGCAC-TATTCTGACCAGACCGCTTCTAGAAAGTGTG    |        |        |        |        |        |               |
|                                                      |          | Section 2142 |                                                                                 |        |        |        |        |        |               |
|                                                      |          | (164858)     | 164858                                                                          | 164868 | 164879 | 164890 | 164901 | 164912 | 164923 164934 |
| Candidatus Carsonella ruddii strain BT chromosome... | (164377) |              | TTTTTTTTTATAATAATTAAAAATATTCAAAAATATATTTTA-ATTCATAAAAAAATTTAAAAATTTCTTTTTTTACTT |        |        |        |        |        |               |
| Candidatus Carsonella 135557 - 167442nt              | (28821)  |              | TTTTTTTTTATAATAATTAAAAATATTCAAAAATATATTTTA-ATTCATAAAAAAATTTAAAAATTTCTTTTTTTACTT |        |        |        |        |        |               |
| SARS-CoV-2 Reference Genome NC_045512.2              | (26932)  |              | AACTCGTAAATCGGAGCTGTGATCCCTTCGTGGACATCTTCGTATTGCTGGACACCATCTAGGACG-----CTG      |        |        |        |        |        |               |

## SARS-CoV-2 &amp; Bakterien.apr

|                                                      |          |                                                                                                                                                             |        |        |        |        |        |        |        |              |
|------------------------------------------------------|----------|-------------------------------------------------------------------------------------------------------------------------------------------------------------|--------|--------|--------|--------|--------|--------|--------|--------------|
|                                                      |          |                                                                                                                                                             |        |        |        |        |        |        |        | Section 2143 |
|                                                      | (164935) | 164935                                                                                                                                                      | 164945 | 164956 | 164967 | 164978 | 164989 | 165000 | 165011 |              |
| Candidatus Carsonella ruddii strain BT chromosome... | (164453) | T T A A A T A A T T T A A T T T A T T T A A A A A A A C T A T T T T T T T T T T A T T T A A A C A A T T T T C A A T T T C T A A A A A A T T A T A A T T T   |        |        |        |        |        |        |        |              |
| Candidatus Carsonella 135557 - 167442nt              | (28897)  | T T A A A T A A T T T A A T T T A T T T A A A A A A A C T A T T T T T T T T T T A T T T A A A C A A T T T T C A A T T T C T A A A A A A T T A T A A T T T   |        |        |        |        |        |        |        |              |
| SARS-CoV-2 Reference Genome NC_045512.2              | (26999)  | T G A C A T C A A G G A C C T G C C T - A A A G A A A T C A C T G T T G C T A C A T C A C G A A C G C T T T C - - T T A - T T A C A A A T T G G G A G C T   |        |        |        |        |        |        |        |              |
|                                                      |          |                                                                                                                                                             |        |        |        |        |        |        |        | Section 2144 |
|                                                      | (165012) | 165012                                                                                                                                                      | 165022 | 165033 | 165044 | 165055 | 165066 | 165077 | 165088 |              |
| Candidatus Carsonella ruddii strain BT chromosome... | (164530) | T T A A T T A T A T T A T T T A A A T T T T T A A A T A A T T T A T C T T A A T A A A A A T A T T T T T - - A T T A A A A T T T A T T A T T T T A T T T     |        |        |        |        |        |        |        |              |
| Candidatus Carsonella 135557 - 167442nt              | (28974)  | T T A A T T A T A T T A T T T T A A A T T T T T A A A T A A T T T A T C T T A A T A A A A A T A T T T T T - - A T T A A A A T T T A T T A T T T T A T T T   |        |        |        |        |        |        |        |              |
| SARS-CoV-2 Reference Genome NC_045512.2              | (27072)  | T - - - - C G C A G C G T G T A G C A G G T G A C T C A G G T T T G C T G C A T A C A G T C G C T A C A G G A T T G G C A A C T A T A A A T T A A A C A     |        |        |        |        |        |        |        |              |
|                                                      |          |                                                                                                                                                             |        |        |        |        |        |        |        | Section 2145 |
|                                                      | (165089) | 165089                                                                                                                                                      | 165099 | 165110 | 165121 | 165132 | 165143 | 165154 | 165165 |              |
| Candidatus Carsonella ruddii strain BT chromosome... | (164605) | T T T G T T T T T A A A T T A G A A A A T A A A A A A T T A - T T T G T T T T T T A T A A A A A T T T A A A A A A A A A A T T A A T T T - - T T A A A T A   |        |        |        |        |        |        |        |              |
| Candidatus Carsonella 135557 - 167442nt              | (29049)  | T T T G T T T T T A A A T T A G A A A A T A A A A A A T T A - T T T G T T T T T T A T A A A A A T T T A A A A A A A A A A T T A A T T T - - T T A A A T A   |        |        |        |        |        |        |        |              |
| SARS-CoV-2 Reference Genome NC_045512.2              | (27145)  | C A G A C C A T T C C A G T A G C A G T G A C A A T A T T G C T T T G C T T G T A C A G T A A G T G A C A A C A G A T G T T T C A T C T C G T T G A C T T   |        |        |        |        |        |        |        |              |
|                                                      |          |                                                                                                                                                             |        |        |        |        |        |        |        | Section 2146 |
|                                                      | (165166) | 165166                                                                                                                                                      | 165176 | 165187 | 165198 | 165209 | 165220 | 165231 | 165242 |              |
| Candidatus Carsonella ruddii strain BT chromosome... | (164679) | T C T T T T T A A T A A A A A A A - A T T T T T T T T T T T A T A A T A A A A T T T A T A A A A T T T T T T T T T T T T A A T - A T T A A A A C T           |        |        |        |        |        |        |        |              |
| Candidatus Carsonella 135557 - 167442nt              | (29123)  | T C T T T T T A A T A A A A A A A - A T T T T T T T T T T T A T A A T A A A A T T T A T A A A A T T T T T T T T T T T T A A T - A T T A A A A C T           |        |        |        |        |        |        |        |              |
| SARS-CoV-2 Reference Genome NC_045512.2              | (27222)  | T C A G G T T A C T A T A G C A G A G A T A T T A C T A A T T A T T A T G A G G A C T T T T A A A G T T T C C A T T T G G A A T C T T G A T T A C A T C A   |        |        |        |        |        |        |        |              |
|                                                      |          |                                                                                                                                                             |        |        |        |        |        |        |        | Section 2147 |
|                                                      | (165243) | 165243                                                                                                                                                      | 165253 | 165264 | 165275 | 165286 | 165297 | 165308 | 165319 |              |
| Candidatus Carsonella ruddii strain BT chromosome... | (164754) | A A A C C A A T A T G G A G T A A A A T A T G A A A A A T A T T T T T T T T T T T A A T A A A T A C A A A A C C T A T T A A A T T T A T T T T T A T T T     |        |        |        |        |        |        |        |              |
| Candidatus Carsonella 135557 - 167442nt              | (29198)  | A A A C C A A T A T G G A G T A A A A T A T G A A A A A T A T T T T T T T T T T T A A T A A A T A C A A A A C C T A T T A A A T T T A T T T T T A T T T     |        |        |        |        |        |        |        |              |
| SARS-CoV-2 Reference Genome NC_045512.2              | (27299)  | T A A A C C T C A T A - A T T A A A A A T T A T A T C T A A G T C A C T A A C T G A G A A A T A A A T T T C - - T C A A T T A G A T G A A G A G C A A C C A |        |        |        |        |        |        |        |              |
|                                                      |          |                                                                                                                                                             |        |        |        |        |        |        |        | Section 2148 |
|                                                      | (165320) | 165320                                                                                                                                                      | 165330 | 165341 | 165352 | 165363 | 165374 | 165385 | 165396 |              |
| Candidatus Carsonella ruddii strain BT chromosome... | (164831) | T A G A A T A A A A A C A A A C T T T A A T T T A A A T A A T G T T T T T T T T T A - - T A A A A A A T T T T T T T T G T G T A A T A T T T A T A A         |        |        |        |        |        |        |        |              |
| Candidatus Carsonella 135557 - 167442nt              | (29275)  | T A G A A T A A A A A C A A A C T T T A A T T T A A A T A A T G T T T T T T T T T A - - T A A A A A A T T T T T T T T G T G T A A T A T T T A T A A         |        |        |        |        |        |        |        |              |
| SARS-CoV-2 Reference Genome NC_045512.2              | (27373)  | A T G G A G A T T G A T T A A A C G A A C A T G A A A A T A T T C T T T T C T T G G C A C T G A T A A C A C T C G C T A C T T G T G A G C T T T A T C A     |        |        |        |        |        |        |        |              |

SARS-CoV-2 & Bakterien.apr

|                                                      |          |                                                                                 |              |        |        |        |        |        |        |  |
|------------------------------------------------------|----------|---------------------------------------------------------------------------------|--------------|--------|--------|--------|--------|--------|--------|--|
|                                                      |          |                                                                                 | Section 2149 |        |        |        |        |        |        |  |
|                                                      | (165397) | 165397                                                                          | 165407       | 165418 | 165429 | 165440 | 165451 | 165462 | 165473 |  |
| Candidatus Carsonella ruddii strain BT chromosome... | (164906) | AATTTTTTAAATTTTATTTTGAATAAATAATTTTAAATTTAAATTTGATTTAAAAAA                       |              |        |        |        |        |        |        |  |
| Candidatus Carsonella 135557 - 167442nt              | (29350)  | AATTTTTTAAATTTTATTTTGAATAAATAATTTTAAATTTAAATTTGATTTAAAAAA                       |              |        |        |        |        |        |        |  |
| SARS-CoV-2 Reference Genome NC_045512.2              | (27450)  | C-TACCAAGAGTGTGTAGAGGTACAAAGTACTTTTA--A-----AAGAACTT-TGCTCT--TCTGGAAAT          |              |        |        |        |        |        |        |  |
|                                                      |          |                                                                                 | Section 2150 |        |        |        |        |        |        |  |
|                                                      | (165474) | 165474                                                                          | 165484       | 165495 | 165506 | 165517 | 165528 | 165539 | 165550 |  |
| Candidatus Carsonella ruddii strain BT chromosome... | (164983) | ATAATTTCTTTTATTTTAAATTAATATAATAGTTTAAAAATATATATTTTTTTTAAAAAATTTT                |              |        |        |        |        |        |        |  |
| Candidatus Carsonella 135557 - 167442nt              | (29427)  | ATAATTTCTTTTATTTTAAATTAATATAATAGTTTAAAAATATATATTTTTTTTAAAAAATTTT                |              |        |        |        |        |        |        |  |
| SARS-CoV-2 Reference Genome NC_045512.2              | (27512)  | ACGAGGGCAAATTCACC---ATTTCAATCCTCTAGCTGATAACAATTTGCACCTGACTTGCCTTAGCACTCAATTTGCT |              |        |        |        |        |        |        |  |
|                                                      |          |                                                                                 | Section 2151 |        |        |        |        |        |        |  |
|                                                      | (165551) | 165551                                                                          | 165561       | 165572 | 165583 | 165594 | 165605 | 165616 | 165627 |  |
| Candidatus Carsonella ruddii strain BT chromosome... | (165060) | TAAAAAAAAAATAAAAAAAAAAAAAATATCTTTTAAATTAATAAAAAAAAAATAAATTTTAAATTTT             |              |        |        |        |        |        |        |  |
| Candidatus Carsonella 135557 - 167442nt              | (29504)  | TAAAAAAAAAATAAAAAAAAAAAAAATATCTTTTAAATTAATAAAAAAAAAATAAATTTTAAATTTT             |              |        |        |        |        |        |        |  |
| SARS-CoV-2 Reference Genome NC_045512.2              | (27586)  | TTTGCTTGTCCT-TGACGGCGTAAAAACGTCCTAT--CAGTTACGTGCCAGATCAGTTTCACCTA-AACTGTTCAATCA |              |        |        |        |        |        |        |  |
|                                                      |          |                                                                                 | Section 2152 |        |        |        |        |        |        |  |
|                                                      | (165628) | 165628                                                                          | 165638       | 165649 | 165660 | 165671 | 165682 | 165693 | 165704 |  |
| Candidatus Carsonella ruddii strain BT chromosome... | (165137) | AAAAATAATTATTAATAATATTTTGTAAATTTTGTGTGTTTAAATAATAACAAAAATTTCAAAAAA              |              |        |        |        |        |        |        |  |
| Candidatus Carsonella 135557 - 167442nt              | (29581)  | AAAAATAATTATTAATAATATTTTGTAAATTTTGTGTGTTTAAATAATAACAAAAATTTCAAAAAA              |              |        |        |        |        |        |        |  |
| SARS-CoV-2 Reference Genome NC_045512.2              | (27659)  | GACAAAGAGGAAGTTCAGAACTTTACTCTCCAAATTTTCTTATTGTTGCGGCATAATG-----TTT-----A-       |              |        |        |        |        |        |        |  |
|                                                      |          |                                                                                 | Section 2153 |        |        |        |        |        |        |  |
|                                                      | (165705) | 165705                                                                          | 165715       | 165726 | 165737 | 165748 | 165759 | 165770 | 165781 |  |
| Candidatus Carsonella ruddii strain BT chromosome... | (165214) | AATAAATATTTTGAATAAATAAATAAATAAATAAATAAATAAATAAATAAATAAATAAATAAATAA              |              |        |        |        |        |        |        |  |
| Candidatus Carsonella 135557 - 167442nt              | (29658)  | AATAAATATTTTGAATAAATAAATAAATAAATAAATAAATAAATAAATAAATAAATAAATAAATAA              |              |        |        |        |        |        |        |  |
| SARS-CoV-2 Reference Genome NC_045512.2              | (27722)  | --TAAACATTTGCTTTCACATCAAAAGAAAGACGAATGATTGAACTTTCAATAATTGACTTCTATTGTGCTTTT      |              |        |        |        |        |        |        |  |
|                                                      |          |                                                                                 | Section 2154 |        |        |        |        |        |        |  |
|                                                      | (165782) | 165782                                                                          | 165792       | 165803 | 165814 | 165825 | 165836 | 165847 | 165858 |  |
| Candidatus Carsonella ruddii strain BT chromosome... | (165289) | ATTTTAAATATGATTTTATTTTAAATAAATAAATAAATAAATAAATAAATAAATAAATAAATAAATAA            |              |        |        |        |        |        |        |  |
| Candidatus Carsonella 135557 - 167442nt              | (29733)  | ATTTTAAATATGATTTTATTTTAAATAAATAAATAAATAAATAAATAAATAAATAAATAAATAAATAA            |              |        |        |        |        |        |        |  |
| SARS-CoV-2 Reference Genome NC_045512.2              | (27797)  | AGCCTTCTGCTATTCCTTGTTTAAATATGCTTATTATCTTTGGTCTCACTGAACTGCAAGA-TCATAAATGA        |              |        |        |        |        |        |        |  |

## SARS-CoV-2 &amp; Bakterien.apr

|                                                      |          |                                                                                 |                                                |        |        |        |        |        |        |  |  |
|------------------------------------------------------|----------|---------------------------------------------------------------------------------|------------------------------------------------|--------|--------|--------|--------|--------|--------|--|--|
|                                                      |          | Section 2155                                                                    |                                                |        |        |        |        |        |        |  |  |
|                                                      | (165859) | 165859                                                                          | 165869                                         | 165880 | 165891 | 165902 | 165913 | 165924 | 165935 |  |  |
| Candidatus Carsonella ruddii strain BT chromosome... | (165364) | ATTTATTTTA--TTATTTAATAAAATATTTT                                                 | TATTTATCAAAACCATACCCAGCTAATTCATCCATTCTAATTTATT |        |        |        |        |        |        |  |  |
| Candidatus Carsonella 135557 - 167442nt              | (29808)  | ATTTATTTTA--TTATTTAATAAAATATTTT                                                 | TATTTATCAAAACCATACCCAGCTAATTCATCCATTCTAATTTATT |        |        |        |        |        |        |  |  |
| SARS-CoV-2 Reference Genome NC_045512.2              | (27873)  | ACTTGTCACGCGCTAACGAAATGAAATTTCTGTTTTCCTTAGGA-ATCATCACAACTGTAGC--TGC--ATTT       | CAC                                            |        |        |        |        |        |        |  |  |
|                                                      |          | Section 2156                                                                    |                                                |        |        |        |        |        |        |  |  |
|                                                      | (165936) | 165936                                                                          | 165946                                         | 165957 | 165968 | 165979 | 165990 | 166001 | 166012 |  |  |
| Candidatus Carsonella ruddii strain BT chromosome... | (165439) | TAATATATCTATTTCAAAGAATTATTGTAAA---AGGAAATTTAGTTTTCTAATTTTAAAAAAAACCTTTT         | TTTT                                           |        |        |        |        |        |        |  |  |
| Candidatus Carsonella 135557 - 167442nt              | (29883)  | TAATATATCTATTTCAAAGAATTATTGTAAA---AGGAAATTTAGTTTTCTAATTTTAAAAAAAACCTTTT         | TTTT                                           |        |        |        |        |        |        |  |  |
| SARS-CoV-2 Reference Genome NC_045512.2              | (27945)  | CAAGA-ATGTAGTTTACAGTCACTGATCAACCATATGTAGTTGATGACCCGTGTCCTATTCACTTCTATT          |                                                |        |        |        |        |        |        |  |  |
|                                                      |          | Section 2157                                                                    |                                                |        |        |        |        |        |        |  |  |
|                                                      | (166013) | 166013                                                                          | 166023                                         | 166034 | 166045 | 166056 | 166067 | 166078 | 166089 |  |  |
| Candidatus Carsonella ruddii strain BT chromosome... | (165513) | TTAAAGATTTAGAAAAAAATTCAATAAAAAATTCATAAATTTTATTTT                                | TTATTTATTTATTTATATAAAATCTATTTGATAA             |        |        |        |        |        |        |  |  |
| Candidatus Carsonella 135557 - 167442nt              | (29957)  | TTAAAGATTTAGAAAAAAATTCAATAAAAAATTCATAAATTTTATTTT                                | TTATTTATTTATTTATATAAAATCTATTTGATAA             |        |        |        |        |        |        |  |  |
| SARS-CoV-2 Reference Genome NC_045512.2              | (28021)  | CTAAATGGTATATTAGAGTAGGAGCTAGAAAATCAGCACTTTTAATTGAATTGTGCGTGGATGAGGCTGGTTCTAA    |                                                |        |        |        |        |        |        |  |  |
|                                                      |          | Section 2158                                                                    |                                                |        |        |        |        |        |        |  |  |
|                                                      | (166090) | 166090                                                                          | 166100                                         | 166111 | 166122 | 166133 | 166144 | 166155 | 166166 |  |  |
| Candidatus Carsonella ruddii strain BT chromosome... | (165590) | AAACAAGGTAAATGTGTTT-TATCG-TAATCATTTT-TATAAACTTTACCTATATTAAAAAATAATTATTAGTAAAATA |                                                |        |        |        |        |        |        |  |  |
| Candidatus Carsonella 135557 - 167442nt              | (30034)  | AAACAAGGTAAATGTGTTT-TATCG-TAATCATTTT-TATAAACTTTACCTATATTAAAAAATAATTATTAGTAAAATA |                                                |        |        |        |        |        |        |  |  |
| SARS-CoV-2 Reference Genome NC_045512.2              | (28098)  | TCACCCATTCAGTACATCGATATCGGTAATTAATACAGTTTCTCTGTTTACCTTT-TACAAATAATTGCCAGGAACCTA |                                                |        |        |        |        |        |        |  |  |
|                                                      |          | Section 2159                                                                    |                                                |        |        |        |        |        |        |  |  |
|                                                      | (166167) | 166167                                                                          | 166177                                         | 166188 | 166199 | 166210 | 166221 | 166232 | 166243 |  |  |
| Candidatus Carsonella ruddii strain BT chromosome... | (165664) | ATTTTAAATAATCTATTTTGAAAACAAGAGTATGAGTTCTTAAAAATTTTATTTTAAAT-ATAAACTACCTTTT      |                                                |        |        |        |        |        |        |  |  |
| Candidatus Carsonella 135557 - 167442nt              | (30108)  | ATTTTAAATAATCTATTTTGAAAACAAGAGTATGAGTTCTTAAAAATTTTATTTTAAAT-ATAAACTACCTTTT      |                                                |        |        |        |        |        |        |  |  |
| SARS-CoV-2 Reference Genome NC_045512.2              | (28174)  | AATTGGG--TAGTCT----TGTAAGT---GCGTGTTCGTTCTATGAAAGACTTTTTAGAGTATCATGACGTTCTGTGTT |                                                |        |        |        |        |        |        |  |  |
|                                                      |          | Section 2160                                                                    |                                                |        |        |        |        |        |        |  |  |
|                                                      | (166244) | 166244                                                                          | 166254                                         | 166265 | 166276 | 166287 | 166298 | 166309 | 166320 |  |  |
| Candidatus Carsonella ruddii strain BT chromosome... | (165740) | ATATCTTTTAAATAATTTAATAATTTAAAAAT-TATAATTATTAATTTTCAAACTCAGTAGTATTTAATT-GTATA    |                                                |        |        |        |        |        |        |  |  |
| Candidatus Carsonella 135557 - 167442nt              | (30184)  | ATATCTTTTAAATAATTTAATAATTTAAAAAT-TATAATTATTAATTTTCAAACTCAGTAGTATTTAATT-GTATA    |                                                |        |        |        |        |        |        |  |  |
| SARS-CoV-2 Reference Genome NC_045512.2              | (28242)  | GTTTAGAATTTCACTAACGAAACAACAAAAATGTCGTGATAATGGACCCCAAAATCAGCGAAATGCACCCCGCAT     |                                                |        |        |        |        |        |        |  |  |



SARS-CoV-2 & Bakterien.apr

|                                                      |          |                                                                                  |        |        |        |        |        |        |               |
|------------------------------------------------------|----------|----------------------------------------------------------------------------------|--------|--------|--------|--------|--------|--------|---------------|
|                                                      |          | Section 2161                                                                     |        |        |        |        |        |        |               |
|                                                      |          | (166321)                                                                         | 166321 | 166331 | 166342 | 166353 | 166364 | 166375 | 166386 166397 |
| Candidatus Carsonella ruddii strain BT chromosome... | (165815) | AAATTATTTCTTAAAAAA-ATTTTCTTTAGAAATTTACTATAAAATTTGAATAAAAAATTATTTT---             |        |        |        |        |        |        |               |
| Candidatus Carsonella 135557 - 167442nt              | (30259)  | AAATTATTTCTTAAAAAA-ATTTTCTTTAGAAATTTACTATAAAATTTGAATAAAAAATTATTTT---             |        |        |        |        |        |        |               |
| SARS-CoV-2 Reference Genome NC_045512.2              | (28319)  | ACGTTTGGTGGACCTCAGATTCAACTGGCAGTAACAGAA---TGAGAGAACGCAGTGGGGCGCGATCAAAAACAACG    |        |        |        |        |        |        |               |
|                                                      |          | Section 2162                                                                     |        |        |        |        |        |        |               |
|                                                      |          | (166398)                                                                         | 166398 | 166408 | 166419 | 166430 | 166441 | 166452 | 166463 166474 |
| Candidatus Carsonella ruddii strain BT chromosome... | (165887) | TTTTTTTTTTTATTAAAAAATAAAATTTTATTATTTTTGTGTTTCTATAAAGTTAAATTTTATTAATAAAAAATA      |        |        |        |        |        |        |               |
| Candidatus Carsonella 135557 - 167442nt              | (30331)  | TTTTTTTTTTTATTAAAAAATAAAATTTTATTATTTTTGTGTTTCTATAAAGTTAAATTTTATTAATAAAAAATA      |        |        |        |        |        |        |               |
| SARS-CoV-2 Reference Genome NC_045512.2              | (28393)  | TCGGCCCCAAGGTTTACCCATAATACTGCGCTTGGTTCAACCGCTCTC--A-CTCAAC-----ATGGCAAGGAA       |        |        |        |        |        |        |               |
|                                                      |          | Section 2163                                                                     |        |        |        |        |        |        |               |
|                                                      |          | (166475)                                                                         | 166475 | 166485 | 166496 | 166507 | 166518 | 166529 | 166540 166551 |
| Candidatus Carsonella ruddii strain BT chromosome... | (165964) | ATTTTAAATTTATTATATTACAATAATTTTCTTTTAAATAAAAAATACTAATTTATTATAAGAAAAACCAAAATATA-   |        |        |        |        |        |        |               |
| Candidatus Carsonella 135557 - 167442nt              | (30408)  | ATTTTAAATTTATTATATTACAATAATTTTCTTTTAAATAAAAAATACTAATTTATTATAAGAAAAACCAAAATATA-   |        |        |        |        |        |        |               |
| SARS-CoV-2 Reference Genome NC_045512.2              | (28460)  | GACCCTAAATTTCCCTCGAGGACAAAGGCGTTCCAACTAAACACCAATAGCAGTCCAGATGACCAAAATGGCTACTACCG |        |        |        |        |        |        |               |
|                                                      |          | Section 2164                                                                     |        |        |        |        |        |        |               |
|                                                      |          | (166552)                                                                         | 166552 | 166562 | 166573 | 166584 | 166595 | 166606 | 166617 166628 |
| Candidatus Carsonella ruddii strain BT chromosome... | (166040) | ---ATCTAAAAATAAAATTAATTATAATTATTTTCTTAAATGAAAAAAATCTTTTCTTTAATTTTCTTC--CTATAT    |        |        |        |        |        |        |               |
| Candidatus Carsonella 135557 - 167442nt              | (30484)  | ---ATCTAAAAATAAAATTAATTATAATTATTTTCTTAAATGAAAAAAATCTTTTCTTTAATTTTCTTC--CTATAT    |        |        |        |        |        |        |               |
| SARS-CoV-2 Reference Genome NC_045512.2              | (28537)  | AAGAGCTACCAGACGAATTCTGGTGGTGCAGGTAA--AAATGAAAGATCTCAGTCCAAGATGGTATTTCTACTACCT    |        |        |        |        |        |        |               |
|                                                      |          | Section 2165                                                                     |        |        |        |        |        |        |               |
|                                                      |          | (166629)                                                                         | 166629 | 166639 | 166650 | 166661 | 166672 | 166683 | 166694 166705 |
| Candidatus Carsonella ruddii strain BT chromosome... | (166112) | A--ATTTTACATAAAGATTTTATATAGTATTGTT-TAGATAATTTAAAAACAATTTTTTTTACCAAAAAATCCT       |        |        |        |        |        |        |               |
| Candidatus Carsonella 135557 - 167442nt              | (30556)  | A--ATTTTACATAAAGATTTTATATAGTATTGTT-TAGATAATTTAAAAACAATTTTTTTTACCAAAAAATCCT       |        |        |        |        |        |        |               |
| SARS-CoV-2 Reference Genome NC_045512.2              | (28612)  | AGGAACATGGGCAGAAAGCTGGACTTCCCTATGTTGCTAACAAAACACGGCATCATATGGGTTGCAACTGAGGGAGCCT  |        |        |        |        |        |        |               |
|                                                      |          | Section 2166                                                                     |        |        |        |        |        |        |               |
|                                                      |          | (166706)                                                                         | 166706 | 166716 | 166727 | 166738 | 166749 | 166760 | 166771 166782 |
| Candidatus Carsonella ruddii strain BT chromosome... | (166186) | TTTGATATAATTTAAATATTTTTTCTTTTCTTAAATTTGTAATGATTTTACAGATCTTGTCATAATATTTTTTAATT    |        |        |        |        |        |        |               |
| Candidatus Carsonella 135557 - 167442nt              | (30630)  | TTTGATATAATTTAAATATTTTTTCTTTTCTTAAATTTGTAATGATTTTACAGATCTTGTCATAATATTTTTTAATT    |        |        |        |        |        |        |               |
| SARS-CoV-2 Reference Genome NC_045512.2              | (28689)  | T--GAATACACCAAAAG-----ATCACATTTGGCACCCAGCAATCCTGCTACAAATGCTGC---AATCGTGTACAACT   |        |        |        |        |        |        |               |

## SARS-CoV-2 &amp; Bakterien.apr

|                                                      |          |                                                                                     |        |        |        |        |        |        |               |
|------------------------------------------------------|----------|-------------------------------------------------------------------------------------|--------|--------|--------|--------|--------|--------|---------------|
|                                                      |          | Section 2167                                                                        |        |        |        |        |        |        |               |
|                                                      |          | (166783)                                                                            | 166783 | 166793 | 166804 | 166815 | 166826 | 166837 | 166848 166859 |
| Candidatus Carsonella ruddii strain BT chromosome... | (166263) | TTTTTAAACAATTGAT-TTATTTAAATAAATTTTGTG-ATAAATTAAAACTTTTTTTATTAGAAAGATTATTAATTAAT     |        |        |        |        |        |        |               |
| Candidatus Carsonella 135557 - 167442nt              | (30707)  | TTTTTAAACAATTGAT-TTATTTAAATAAATTTTGTG-ATAAATTAAAACTTTTTTTATTAGAAAGATTATTAATTAAT     |        |        |        |        |        |        |               |
| SARS-CoV-2 Reference Genome NC_045512.2              | (28756)  | TCCATCAAGGAACAACAATTGCCAAGGAGGCTTCTACGAGAGGAGGAGGCGGCAGTCAAGCCCTCTCTCGTTCCCT        |        |        |        |        |        |        |               |
|                                                      |          | Section 2168                                                                        |        |        |        |        |        |        |               |
|                                                      |          | (166860)                                                                            | 166860 | 166870 | 166881 | 166892 | 166903 | 166914 | 166925 166936 |
| Candidatus Carsonella ruddii strain BT chromosome... | (166338) | AA--ATGATGTTTATTGCTTTTAATAAATTTATTTTTTTTTTAATTATTATT-CTTTTTTTTATAGATTTTATACT        |        |        |        |        |        |        |               |
| Candidatus Carsonella 135557 - 167442nt              | (30782)  | AA--ATGATGTTTATTGCTTTTAATAAATTTATTTTTTTTTTAATTATTATT-CTTTTTTTTATAGATTTTATACT        |        |        |        |        |        |        |               |
| SARS-CoV-2 Reference Genome NC_045512.2              | (28833)  | CATCACGTACGCAACAGTTCAAGAAATTCACCTCCAGGCAGCAGTAGGGGAACTTCTCTTGCATAGATGGCTGGC         |        |        |        |        |        |        |               |
|                                                      |          | Section 2169                                                                        |        |        |        |        |        |        |               |
|                                                      |          | (166937)                                                                            | 166937 | 166947 | 166958 | 166969 | 166980 | 166991 | 167002 167013 |
| Candidatus Carsonella ruddii strain BT chromosome... | (166412) | TTTTTTTTTTTATTTTCAATTTTAAATTTTGGGTATAAAAAATAGAAAAATATATATTTTCCTTCAAAATTCCTATATCAGAA |        |        |        |        |        |        |               |
| Candidatus Carsonella 135557 - 167442nt              | (30856)  | TTTTTTTTTTTATTTTCAATTTTAAATTTTGGGTATAAAAAATAGAAAAATATATATTTTCCTTCAAAATTCCTATATCAGAA |        |        |        |        |        |        |               |
| SARS-CoV-2 Reference Genome NC_045512.2              | (28910)  | AATGGCGGTGATGCTGCTCTTGTCTTGCCTGCTTGAAC-AGATTGAAACAGCTTGAGAGCAAAATGCTTGGTAAAG        |        |        |        |        |        |        |               |
|                                                      |          | Section 2170                                                                        |        |        |        |        |        |        |               |
|                                                      |          | (167014)                                                                            | 167014 | 167024 | 167035 | 167046 | 167057 | 167068 | 167079 167090 |
| Candidatus Carsonella ruddii strain BT chromosome... | (166489) | AATTTAAATAAACTCCTTTAATATTATTTTGAAATTTTAAAAATTAA-CTCAACACCTTTTTCTTTAAAAA--TAAT       |        |        |        |        |        |        |               |
| Candidatus Carsonella 135557 - 167442nt              | (30933)  | AATTTAAATAAACTCCTTTAATATTATTTTGAAATTTTAAAAATTAA-CTCAACACCTTTTTCTTTAAAAA--TAAT       |        |        |        |        |        |        |               |
| SARS-CoV-2 Reference Genome NC_045512.2              | (28986)  | GCCAACAAACAAGGCAACCTGTCTACTAAAGAAATCTGCTGCTGAGGCTTCTAAGAAGCCCTCGGCAAAAACGTACT       |        |        |        |        |        |        |               |
|                                                      |          | Section 2171                                                                        |        |        |        |        |        |        |               |
|                                                      |          | (167091)                                                                            | 167091 | 167101 | 167112 | 167123 | 167134 | 167145 | 167156 167167 |
| Candidatus Carsonella ruddii strain BT chromosome... | (166563) | TTCTCTTC--CTTTAAAAATTACACAACTTTTAAAGTATAACCTTCTAATAAAAAAAATTAGCTTTTAAATTTT          |        |        |        |        |        |        |               |
| Candidatus Carsonella 135557 - 167442nt              | (31007)  | TTCTCTTC--CTTTAAAAATTACACAACTTTTAAAGTATAACCTTCTAATAAAAAAAATTAGCTTTTAAATTTT          |        |        |        |        |        |        |               |
| SARS-CoV-2 Reference Genome NC_045512.2              | (29063)  | GCCACTAAAGCATACAAATGTAACACAACTTTTCGGCAGACGTGGTCCAGAACAAACCCAAAGGAATTTTGGGGACC-      |        |        |        |        |        |        |               |
|                                                      |          | Section 2172                                                                        |        |        |        |        |        |        |               |
|                                                      |          | (167168)                                                                            | 167168 | 167178 | 167189 | 167200 | 167211 | 167222 | 167233 167244 |
| Candidatus Carsonella ruddii strain BT chromosome... | (166638) | AATATCATAATCTCTTTTATGAATATTTAAACCAATT-----CTAATTTCTTTTAAATCTACCTACTTTGGATTTTTT      |        |        |        |        |        |        |               |
| Candidatus Carsonella 135557 - 167442nt              | (31082)  | AATATCATAATCTCTTTTATGAATATTTAAACCAATT-----CTAATTTCTTTTAAATCTACCTACTTTGGATTTTTT      |        |        |        |        |        |        |               |
| SARS-CoV-2 Reference Genome NC_045512.2              | (29139)  | AGGAAC-TAATCAGACAAGGAACCTGATTACAAACATTGGCCGCAATTTGCA--CAATTTGCCCCAGCGCTTCAGCG       |        |        |        |        |        |        |               |

## SARS-CoV-2 &amp; Bakterien.apr

|                                                      |          |                                                                                     |        |        |        |        |        |        |        |        |  |
|------------------------------------------------------|----------|-------------------------------------------------------------------------------------|--------|--------|--------|--------|--------|--------|--------|--------|--|
|                                                      |          | Section 2173                                                                        |        |        |        |        |        |        |        |        |  |
|                                                      |          | (167245)                                                                            | 167245 | 167255 | 167266 | 167277 | 167288 | 167299 | 167310 | 167321 |  |
| Candidatus Carsonella ruddii strain BT chromosome... | (166710) | TTTTCACAATTTTCTTTTTTCTATTATTTTAAAAAATTAAAAAATAATTGATTTTTTTTTTTGTAAAAAAAATAAAAG      |        |        |        |        |        |        |        |        |  |
| Candidatus Carsonella 135557 - 167442nt              | (31154)  | TTTTCACAATTTTCTTTTTTCTATTATTTTAAAAAATTAAAAAATAATTGATTTTTTTTTTTGTAAAAAAAATAAAAG      |        |        |        |        |        |        |        |        |  |
| SARS-CoV-2 Reference Genome NC_045512.2              | (29213)  | TTCCTCGGAATGTC----GCGCATTTGGCAATGGAAGTCAACACCTTCGGGAACGTGGTTGACCTACACAGGTGCCATCA    |        |        |        |        |        |        |        |        |  |
|                                                      |          | Section 2174                                                                        |        |        |        |        |        |        |        |        |  |
|                                                      |          | (167322)                                                                            | 167322 | 167332 | 167343 | 167354 | 167365 | 167376 | 167387 | 167398 |  |
| Candidatus Carsonella ruddii strain BT chromosome... | (166787) | AATACTTTTCTAGTTTTTTTAAAAAATAAATAAAAAATTTATTTTAAATAAATTGTATAAAAAAGTTTTTATTAAAAATT    |        |        |        |        |        |        |        |        |  |
| Candidatus Carsonella 135557 - 167442nt              | (31231)  | AATACTTTTCTAGTTTTTTTAAAAAATAAATAAAAAATTTATTTTAAATAAATTGTATAAAAAAGTTTTTATTAAAAATT    |        |        |        |        |        |        |        |        |  |
| SARS-CoV-2 Reference Genome NC_045512.2              | (29286)  | AATTGGATGACAAAGATCCAAAATTTCAAAGATCAAGTCAATTTTGCTGAAATAAGCATAATTGACGCATTACAAAACATTTC |        |        |        |        |        |        |        |        |  |
|                                                      |          | Section 2175                                                                        |        |        |        |        |        |        |        |        |  |
|                                                      |          | (167399)                                                                            | 167399 | 167409 | 167420 | 167431 | 167442 | 167453 | 167464 | 167475 |  |
| Candidatus Carsonella ruddii strain BT chromosome... | (166864) | ATATTAAATTTTATTAAAAATTAA--AAAAGAAATTTTTTTTATACATTTATTAAATTATTAAAAATCAGATTTTGAAAT    |        |        |        |        |        |        |        |        |  |
| Candidatus Carsonella 135557 - 167442nt              | (31308)  | ATATTAAATTTTATTAAAAATTAA--AAAAGAAATTTTTTTTATACATTTATTAAATTATTAAAAATCAGATTTTGAAAT    |        |        |        |        |        |        |        |        |  |
| SARS-CoV-2 Reference Genome NC_045512.2              | (29363)  | CCACCACAGAGCCAAAAAGGACAAAAGAAAGAGGCATGATGAA--ACTCAGCCCTTACCG--CAGAGACAGAA           |        |        |        |        |        |        |        |        |  |
|                                                      |          | Section 2176                                                                        |        |        |        |        |        |        |        |        |  |
|                                                      |          | (167476)                                                                            | 167476 | 167486 | 167497 | 167508 | 167519 | 167530 | 167541 | 167552 |  |
| Candidatus Carsonella ruddii strain BT chromosome... | (166939) | CTGTTTTCAATTTTATACCAATTTATATTTTCTAAAAAATGCTATAAATATTGATTTTTATTGTTTAAATAATCTAA       |        |        |        |        |        |        |        |        |  |
| Candidatus Carsonella 135557 - 167442nt              | (31383)  | CTGTTTTCAATTTTATACCAATTTATATTTTCTAAAAAATGCTATAAATATTGATTTTTATTGTTTAAATAATCTAA       |        |        |        |        |        |        |        |        |  |
| SARS-CoV-2 Reference Genome NC_045512.2              | (29436)  | AACAGCAAACCTGTGACTC----TTCTTCCGTCTGCAGATTGATGATG--ATTTCCTCCAAACCAATTGCACCAATCBA-    |        |        |        |        |        |        |        |        |  |
|                                                      |          | Section 2177                                                                        |        |        |        |        |        |        |        |        |  |
|                                                      |          | (167553)                                                                            | 167553 | 167563 | 167574 | 167585 | 167596 | 167607 | 167618 | 167629 |  |
| Candidatus Carsonella ruddii strain BT chromosome... | (167016) | ATAATAAGAAATGTTTATGTAAATCAATACATATCAAAGGAACACGTGTTAAACACCTAAGTCTATTGAGAATAATG       |        |        |        |        |        |        |        |        |  |
| Candidatus Carsonella 135557 - 167442nt              | (31460)  | ATAATAAGAAATGTTTATGTAAATCAATACATATCAAAGGAACACGTGTTAAACACCTAAGTCTATTGAGAATAATG       |        |        |        |        |        |        |        |        |  |
| SARS-CoV-2 Reference Genome NC_045512.2              | (29505)  | -TGAGCAG--TGCTGACTCAACTCAGGCCTAAACTCATGACAGACACACAAAGGAGATG-GGCTAT-----ATAAAC       |        |        |        |        |        |        |        |        |  |
|                                                      |          | Section 2178                                                                        |        |        |        |        |        |        |        |        |  |
|                                                      |          | (167630)                                                                            | 167630 | 167640 | 167651 | 167662 | 167673 | 167684 | 167695 | 167706 |  |
| Candidatus Carsonella ruddii strain BT chromosome... | (167093) | GATTATTATTTTCATAAGTTTTTATCATACATAATCTATTATTGTTATACACTAACCATCCCAACCATTAATAATTT       |        |        |        |        |        |        |        |        |  |
| Candidatus Carsonella 135557 - 167442nt              | (31537)  | GATTATTATTTTCATAAGTTTTTATCATACATAATCTATTATTGTTATACACTAACCATCCCAACCATTAATAATTT       |        |        |        |        |        |        |        |        |  |
| SARS-CoV-2 Reference Genome NC_045512.2              | (29573)  | GTTTTCGCTTTTC-----CGTTTACGATATATAGTCTACTCTTGTG---CAGAAATGAATTCTCGTAACCTACATAGCA     |        |        |        |        |        |        |        |        |  |

## SARS-CoV-2 &amp; Bakterien.apr

[illegible]

## SARS-CoV-2 &amp; Bakterien.apr

|                                                      |          |                                                                                |        |        |        |        |        |               |
|------------------------------------------------------|----------|--------------------------------------------------------------------------------|--------|--------|--------|--------|--------|---------------|
|                                                      |          | Section 2185                                                                   |        |        |        |        |        |               |
|                                                      | (168169) | 168169                                                                         | 168179 | 168190 | 168201 | 168212 | 168223 | 168234 168245 |
| Candidatus Carsonella ruddii strain BT chromosome... | (167627) | CATAATTTTTTAAC TATTTTTTTGTAAAATTTACAACATATAATAAAAGTATTATGATTTTTATTCTTTTAATCTTT |        |        |        |        |        |               |
| Candidatus Carsonella 135557 - 167442nt              | (31887)  | -----                                                                          |        |        |        |        |        |               |
| SARS-CoV-2 Reference Genome NC_045512.2              | (29904)  | -----                                                                          |        |        |        |        |        |               |
|                                                      |          | Section 2186                                                                   |        |        |        |        |        |               |
|                                                      | (168246) | 168246                                                                         | 168256 | 168267 | 168278 | 168289 | 168300 | 168311 168322 |
| Candidatus Carsonella ruddii strain BT chromosome... | (167704) | GATAAAACAAAAGATATATTTTTTAAAGAAATTATTTTAAATATTTCTTTTTTATATTTAATGTTATTATACTTTT   |        |        |        |        |        |               |
| Candidatus Carsonella 135557 - 167442nt              | (31887)  | -----                                                                          |        |        |        |        |        |               |
| SARS-CoV-2 Reference Genome NC_045512.2              | (29904)  | -----                                                                          |        |        |        |        |        |               |
|                                                      |          | Section 2187                                                                   |        |        |        |        |        |               |
|                                                      | (168323) | 168323                                                                         | 168333 | 168344 | 168355 | 168366 | 168377 | 168388 168399 |
| Candidatus Carsonella ruddii strain BT chromosome... | (167781) | AATATAATTATTATAATTAAATAATATTAATAAAAAAGTTAATTTATTTCCAAATTTAATATACATTAAACATGTTG  |        |        |        |        |        |               |
| Candidatus Carsonella 135557 - 167442nt              | (31887)  | -----                                                                          |        |        |        |        |        |               |
| SARS-CoV-2 Reference Genome NC_045512.2              | (29904)  | -----                                                                          |        |        |        |        |        |               |
|                                                      |          | Section 2188                                                                   |        |        |        |        |        |               |
|                                                      | (168400) | 168400                                                                         | 168410 | 168421 | 168432 | 168443 | 168454 | 168465 168476 |
| Candidatus Carsonella ruddii strain BT chromosome... | (167858) | AATAATAATAAAAAAATTATTAAATTTAATTGTTTTTTTAAAAAAAAGAAGCTTTTTTTTATAATAATTAAATTTA   |        |        |        |        |        |               |
| Candidatus Carsonella 135557 - 167442nt              | (31887)  | -----                                                                          |        |        |        |        |        |               |
| SARS-CoV-2 Reference Genome NC_045512.2              | (29904)  | -----                                                                          |        |        |        |        |        |               |
|                                                      |          | Section 2189                                                                   |        |        |        |        |        |               |
|                                                      | (168477) | 168477                                                                         | 168487 | 168498 | 168509 | 168520 | 168531 | 168542 168553 |
| Candidatus Carsonella ruddii strain BT chromosome... | (167935) | TTTATTTTAAATTTTTTTTTTAAATATGTAAAAATTTATTAAATATAAAAAATATTCCTAAATTATAAATTTTTTT   |        |        |        |        |        |               |
| Candidatus Carsonella 135557 - 167442nt              | (31887)  | -----                                                                          |        |        |        |        |        |               |
| SARS-CoV-2 Reference Genome NC_045512.2              | (29904)  | -----                                                                          |        |        |        |        |        |               |
|                                                      |          | Section 2190                                                                   |        |        |        |        |        |               |
|                                                      | (168554) | 168554                                                                         | 168564 | 168575 | 168586 | 168597 | 168608 | 168619 168630 |
| Candidatus Carsonella ruddii strain BT chromosome... | (168012) | AAATGTTAGAAATTCATTTTTAATTATATTTATTATTATTTTTTTACTTAAATAAAAAATTTGATAATTTTTGCATA  |        |        |        |        |        |               |
| Candidatus Carsonella 135557 - 167442nt              | (31887)  | -----                                                                          |        |        |        |        |        |               |
| SARS-CoV-2 Reference Genome NC_045512.2              | (29904)  | -----                                                                          |        |        |        |        |        |               |

## SARS-CoV-2 &amp; Bakterien.apr

|                                                      |          |                                                                               |              |        |        |        |        |        |        |
|------------------------------------------------------|----------|-------------------------------------------------------------------------------|--------------|--------|--------|--------|--------|--------|--------|
|                                                      |          |                                                                               | Section 2191 |        |        |        |        |        |        |
|                                                      | (168631) | 168631                                                                        | 168641       | 168652 | 168663 | 168674 | 168685 | 168696 | 168707 |
| Candidatus Carsonella ruddii strain BT chromosome... | (168089) | ATTTGTTTACCATTATTTTGTGTTATTTATTAATTTTATTTTCTTGTTATATCACCCACCATAACATTTATCTAAAC |              |        |        |        |        |        |        |
| Candidatus Carsonella 135557 - 167442nt              | (31887)  | -----                                                                         |              |        |        |        |        |        |        |
| SARS-CoV-2 Reference Genome NC_045512.2              | (29904)  | -----                                                                         |              |        |        |        |        |        |        |
|                                                      |          |                                                                               | Section 2192 |        |        |        |        |        |        |
|                                                      | (168708) | 168708                                                                        | 168718       | 168729 | 168740 | 168751 | 168762 | 168773 | 168784 |
| Candidatus Carsonella ruddii strain BT chromosome... | (168166) | ATTTTTTTTATAAGAAAATATTTTTTTTGAAAATATTATTTTTTTTATATAAAAAATTTATATTTATATTAATTA   |              |        |        |        |        |        |        |
| Candidatus Carsonella 135557 - 167442nt              | (31887)  | -----                                                                         |              |        |        |        |        |        |        |
| SARS-CoV-2 Reference Genome NC_045512.2              | (29904)  | -----                                                                         |              |        |        |        |        |        |        |
|                                                      |          |                                                                               | Section 2193 |        |        |        |        |        |        |
|                                                      | (168785) | 168785                                                                        | 168795       | 168806 | 168817 | 168828 | 168839 | 168850 | 168861 |
| Candidatus Carsonella ruddii strain BT chromosome... | (168243) | AATTATTTTTTAATATTATTTTTTATTTTTTGAAAAATAAATAACAATTATTTATTAAATCATTTTCTATAATAAAA |              |        |        |        |        |        |        |
| Candidatus Carsonella 135557 - 167442nt              | (31887)  | -----                                                                         |              |        |        |        |        |        |        |
| SARS-CoV-2 Reference Genome NC_045512.2              | (29904)  | -----                                                                         |              |        |        |        |        |        |        |
|                                                      |          |                                                                               | Section 2194 |        |        |        |        |        |        |
|                                                      | (168862) | 168862                                                                        | 168872       | 168883 | 168894 | 168905 | 168916 | 168927 | 168938 |
| Candidatus Carsonella ruddii strain BT chromosome... | (168320) | TTAAATTCTTCTATTATTTTATCATTTATAGAACTTTAATAAAAAAAGTTCACTTTTTAAAAAATGATGAAATTT   |              |        |        |        |        |        |        |
| Candidatus Carsonella 135557 - 167442nt              | (31887)  | -----                                                                         |              |        |        |        |        |        |        |
| SARS-CoV-2 Reference Genome NC_045512.2              | (29904)  | -----                                                                         |              |        |        |        |        |        |        |
|                                                      |          |                                                                               | Section 2195 |        |        |        |        |        |        |
|                                                      | (168939) | 168939                                                                        | 168949       | 168960 | 168971 | 168982 | 168993 | 169004 | 169015 |
| Candidatus Carsonella ruddii strain BT chromosome... | (168397) | AAATTCATAAAATAAAAAACCATTTATTTTTTTATTTAAAAATTAATAAATTTATATAAATTTA              |              |        |        |        |        |        |        |
| Candidatus Carsonella 135557 - 167442nt              | (31887)  | -----                                                                         |              |        |        |        |        |        |        |
| SARS-CoV-2 Reference Genome NC_045512.2              | (29904)  | -----                                                                         |              |        |        |        |        |        |        |
|                                                      |          |                                                                               | Section 2196 |        |        |        |        |        |        |
|                                                      | (169016) | 169016                                                                        | 169026       | 169037 | 169048 | 169059 | 169070 | 169081 | 169092 |
| Candidatus Carsonella ruddii strain BT chromosome... | (168474) | TATAAAAAATAATAATTAATAAATTATCATATTTTTTTATTTTTATTTTATAATAATTAAATTAATAATATATTGT  |              |        |        |        |        |        |        |
| Candidatus Carsonella 135557 - 167442nt              | (31887)  | -----                                                                         |              |        |        |        |        |        |        |
| SARS-CoV-2 Reference Genome NC_045512.2              | (29904)  | -----                                                                         |              |        |        |        |        |        |        |

## SARS-CoV-2 &amp; Bakterien.apr

|                                                      |          |                                                                               |        |        |        |        |        |               |
|------------------------------------------------------|----------|-------------------------------------------------------------------------------|--------|--------|--------|--------|--------|---------------|
|                                                      |          | Section 2197                                                                  |        |        |        |        |        |               |
|                                                      | (169093) | 169093                                                                        | 169103 | 169114 | 169125 | 169136 | 169147 | 169158 169169 |
| Candidatus Carsonella ruddii strain BT chromosome... | (168551) | ATTATTAAAAAAATTTTTTTTAAAACATATAAAATTAATAATTACAATTTGTTTCATATTCAAAAAATTTTTTC    |        |        |        |        |        |               |
| Candidatus Carsonella 135557 - 167442nt              | (31887)  | -----                                                                         |        |        |        |        |        |               |
| SARS-CoV-2 Reference Genome NC_045512.2              | (29904)  | -----                                                                         |        |        |        |        |        |               |
|                                                      |          | Section 2198                                                                  |        |        |        |        |        |               |
|                                                      | (169170) | 169170                                                                        | 169180 | 169191 | 169202 | 169213 | 169224 | 169235 169246 |
| Candidatus Carsonella ruddii strain BT chromosome... | (168628) | ATTAAAAATATTTATTATCCAAATATTTTTTTTATTAAATAAAAAAATATTATTGGATTGTTATCCAAAATTTAG   |        |        |        |        |        |               |
| Candidatus Carsonella 135557 - 167442nt              | (31887)  | -----                                                                         |        |        |        |        |        |               |
| SARS-CoV-2 Reference Genome NC_045512.2              | (29904)  | -----                                                                         |        |        |        |        |        |               |
|                                                      |          | Section 2199                                                                  |        |        |        |        |        |               |
|                                                      | (169247) | 169247                                                                        | 169257 | 169268 | 169279 | 169290 | 169301 | 169312 169323 |
| Candidatus Carsonella ruddii strain BT chromosome... | (168705) | ATAAAATTTTCAATTTTTTAAAAAAATTTCACTATGTAAATTTCTATAAAACCTAAAAAAAACAATTACCAAAC    |        |        |        |        |        |               |
| Candidatus Carsonella 135557 - 167442nt              | (31887)  | -----                                                                         |        |        |        |        |        |               |
| SARS-CoV-2 Reference Genome NC_045512.2              | (29904)  | -----                                                                         |        |        |        |        |        |               |
|                                                      |          | Section 2200                                                                  |        |        |        |        |        |               |
|                                                      | (169324) | 169324                                                                        | 169334 | 169345 | 169356 | 169367 | 169378 | 169389 169400 |
| Candidatus Carsonella ruddii strain BT chromosome... | (168782) | AAAATAGAATTTTTTCTCTCAAAAAAATAGAGTAATCATTTGTTTATTAAATTTAAATAAAAAAAATTATCTTTTAA |        |        |        |        |        |               |
| Candidatus Carsonella 135557 - 167442nt              | (31887)  | -----                                                                         |        |        |        |        |        |               |
| SARS-CoV-2 Reference Genome NC_045512.2              | (29904)  | -----                                                                         |        |        |        |        |        |               |
|                                                      |          | Section 2201                                                                  |        |        |        |        |        |               |
|                                                      | (169401) | 169401                                                                        | 169411 | 169422 | 169433 | 169444 | 169455 | 169466 169477 |
| Candidatus Carsonella ruddii strain BT chromosome... | (168859) | ATAAATAGTAAATATATATTAACATTAAATTTATAAAAAAAAAAATATTTTTTTTATTATAAAAAAAAAATATTTT  |        |        |        |        |        |               |
| Candidatus Carsonella 135557 - 167442nt              | (31887)  | -----                                                                         |        |        |        |        |        |               |
| SARS-CoV-2 Reference Genome NC_045512.2              | (29904)  | -----                                                                         |        |        |        |        |        |               |
|                                                      |          | Section 2202                                                                  |        |        |        |        |        |               |
|                                                      | (169478) | 169478                                                                        | 169488 | 169499 | 169510 | 169521 | 169532 | 169543 169554 |
| Candidatus Carsonella ruddii strain BT chromosome... | (168936) | TTTTATCATAATTATTATCAATAATAAAAAAATGAATACAATTAATAAAAGTTTTTTTAAAGAAAAAATTTTTTGGT |        |        |        |        |        |               |
| Candidatus Carsonella 135557 - 167442nt              | (31887)  | -----                                                                         |        |        |        |        |        |               |
| SARS-CoV-2 Reference Genome NC_045512.2              | (29904)  | -----                                                                         |        |        |        |        |        |               |

## SARS-CoV-2 &amp; Bakterien.apr

|                                                      |          |                                                                                |        |        |        |        |        |               |
|------------------------------------------------------|----------|--------------------------------------------------------------------------------|--------|--------|--------|--------|--------|---------------|
|                                                      |          | Section 2203                                                                   |        |        |        |        |        |               |
|                                                      | (169555) | 169555                                                                         | 169565 | 169576 | 169587 | 169598 | 169609 | 169620 169631 |
| Candidatus Carsonella ruddii strain BT chromosome... | (169013) | AAAAAAATACCTATTTTAATAATTTTAATAAAATTATTATTTTATTTTAAAAATATCTTTAATATTAATTATACC    |        |        |        |        |        |               |
| Candidatus Carsonella 135557 - 167442nt              | (31887)  | -----                                                                          |        |        |        |        |        |               |
| SARS-CoV-2 Reference Genome NC_045512.2              | (29904)  | -----                                                                          |        |        |        |        |        |               |
|                                                      |          | Section 2204                                                                   |        |        |        |        |        |               |
|                                                      | (169632) | 169632                                                                         | 169642 | 169653 | 169664 | 169675 | 169686 | 169697 169708 |
| Candidatus Carsonella ruddii strain BT chromosome... | (169090) | AGATAAAATTTTAACTATAATTATGTTTCCATATTTTAAATTATTCAAATATTCTAAAAATAAAATAACTTTTCTT   |        |        |        |        |        |               |
| Candidatus Carsonella 135557 - 167442nt              | (31887)  | -----                                                                          |        |        |        |        |        |               |
| SARS-CoV-2 Reference Genome NC_045512.2              | (29904)  | -----                                                                          |        |        |        |        |        |               |
|                                                      |          | Section 2205                                                                   |        |        |        |        |        |               |
|                                                      | (169709) | 169709                                                                         | 169719 | 169730 | 169741 | 169752 | 169763 | 169774 169785 |
| Candidatus Carsonella ruddii strain BT chromosome... | (169167) | TTTTAAAAATAATTTTTTTTTTTTTAAAAAAATAAATTAAATTAAACCAATACTATATTTAGAAGAAATAAAAAAATT |        |        |        |        |        |               |
| Candidatus Carsonella 135557 - 167442nt              | (31887)  | -----                                                                          |        |        |        |        |        |               |
| SARS-CoV-2 Reference Genome NC_045512.2              | (29904)  | -----                                                                          |        |        |        |        |        |               |
|                                                      |          | Section 2206                                                                   |        |        |        |        |        |               |
|                                                      | (169786) | 169786                                                                         | 169796 | 169807 | 169818 | 169829 | 169840 | 169851 169862 |
| Candidatus Carsonella ruddii strain BT chromosome... | (169244) | TTTTGTTTTTTATTAAATAATGATAATTTATTTTAAATTTTTTAAAAATTAATATAAATATCTATTTTATTAAAAA   |        |        |        |        |        |               |
| Candidatus Carsonella 135557 - 167442nt              | (31887)  | -----                                                                          |        |        |        |        |        |               |
| SARS-CoV-2 Reference Genome NC_045512.2              | (29904)  | -----                                                                          |        |        |        |        |        |               |
|                                                      |          | Section 2207                                                                   |        |        |        |        |        |               |
|                                                      | (169863) | 169863                                                                         | 169873 | 169884 | 169895 | 169906 | 169917 | 169928 169939 |
| Candidatus Carsonella ruddii strain BT chromosome... | (169321) | AATAATAATAATTTTGTTAAATTTTTTAGACAAATTATAACAAAATAAAGTTTGTGGTTCTATACCTTTTAACACAT  |        |        |        |        |        |               |
| Candidatus Carsonella 135557 - 167442nt              | (31887)  | -----                                                                          |        |        |        |        |        |               |
| SARS-CoV-2 Reference Genome NC_045512.2              | (29904)  | -----                                                                          |        |        |        |        |        |               |
|                                                      |          | Section 2208                                                                   |        |        |        |        |        |               |
|                                                      | (169940) | 169940                                                                         | 169950 | 169961 | 169972 | 169983 | 169994 | 170005 170016 |
| Candidatus Carsonella ruddii strain BT chromosome... | (169398) | CTATTAATATTAAACATATTTCACTACAAATTATAGATTTATATATTTTCATTAATAAAATCAAAATGACCAGGACAA |        |        |        |        |        |               |
| Candidatus Carsonella 135557 - 167442nt              | (31887)  | -----                                                                          |        |        |        |        |        |               |
| SARS-CoV-2 Reference Genome NC_045512.2              | (29904)  | -----                                                                          |        |        |        |        |        |               |



## SARS-CoV-2 &amp; Bakterien.apr

|                                                      |          |                                                                                |        |        |        |        |        |               |
|------------------------------------------------------|----------|--------------------------------------------------------------------------------|--------|--------|--------|--------|--------|---------------|
|                                                      |          | Section 2209                                                                   |        |        |        |        |        |               |
|                                                      | (170017) | 170017                                                                         | 170027 | 170038 | 170049 | 170060 | 170071 | 170082 170093 |
| Candidatus Carsonella ruddii strain BT chromosome... | (169475) | TCAATAAAGTTTATTATTTTTTTATTTATTAAAAACAGATAAATATTTAATTTTATAGTATAAAAAATAATTATTTAA |        |        |        |        |        |               |
| Candidatus Carsonella 135557 - 167442nt              | (31887)  | -----                                                                          |        |        |        |        |        |               |
| SARS-CoV-2 Reference Genome NC_045512.2              | (29904)  | -----                                                                          |        |        |        |        |        |               |
|                                                      |          | Section 2210                                                                   |        |        |        |        |        |               |
|                                                      | (170094) | 170094                                                                         | 170104 | 170115 | 170126 | 170137 | 170148 | 170159 170170 |
| Candidatus Carsonella ruddii strain BT chromosome... | (169552) | AAAGTAAATTTTTTTTTATAATTTAAAAATTTTTTACAAAAATTAATTAAAGAATTTAATAAAGTTGTTTTACCAT   |        |        |        |        |        |               |
| Candidatus Carsonella 135557 - 167442nt              | (31887)  | -----                                                                          |        |        |        |        |        |               |
| SARS-CoV-2 Reference Genome NC_045512.2              | (29904)  | -----                                                                          |        |        |        |        |        |               |
|                                                      |          | Section 2211                                                                   |        |        |        |        |        |               |
|                                                      | (170171) | 170171                                                                         | 170181 | 170192 | 170203 | 170214 | 170225 | 170236 170247 |
| Candidatus Carsonella ruddii strain BT chromosome... | (169629) | GATCAACATGAGCAATAATTGAAACATTATTTGCTAAATTCATTATTAATTTTATCAATTATTATTTTAAATATATT  |        |        |        |        |        |               |
| Candidatus Carsonella 135557 - 167442nt              | (31887)  | -----                                                                          |        |        |        |        |        |               |
| SARS-CoV-2 Reference Genome NC_045512.2              | (29904)  | -----                                                                          |        |        |        |        |        |               |
|                                                      |          | Section 2212                                                                   |        |        |        |        |        |               |
|                                                      | (170248) | 170248                                                                         | 170258 | 170269 | 170280 | 170291 | 170302 | 170313 170324 |
| Candidatus Carsonella ruddii strain BT chromosome... | (169706) | TACATTAATACAAGAATCTGTAATAGAAATATTTTTATAATAATTTTAAATTGATTGATTTCATATTCTAAATAAG   |        |        |        |        |        |               |
| Candidatus Carsonella 135557 - 167442nt              | (31887)  | -----                                                                          |        |        |        |        |        |               |
| SARS-CoV-2 Reference Genome NC_045512.2              | (29904)  | -----                                                                          |        |        |        |        |        |               |
|                                                      |          | Section 2213                                                                   |        |        |        |        |        |               |
|                                                      | (170325) | 170325                                                                         | 170335 | 170346 | 170357 | 170368 | 170379 | 170390 170401 |
| Candidatus Carsonella ruddii strain BT chromosome... | (169783) | ATTCAAACATTAAACCATTTATATAAGATTTTAAATATTTAAATTGATTAAATATATTTTCAAAAATATAAATTTGA  |        |        |        |        |        |               |
| Candidatus Carsonella 135557 - 167442nt              | (31887)  | -----                                                                          |        |        |        |        |        |               |
| SARS-CoV-2 Reference Genome NC_045512.2              | (29904)  | -----                                                                          |        |        |        |        |        |               |
|                                                      |          | Section 2214                                                                   |        |        |        |        |        |               |
|                                                      | (170402) | 170402                                                                         | 170412 | 170423 | 170434 | 170445 | 170456 | 170467 170478 |
| Candidatus Carsonella ruddii strain BT chromosome... | (169860) | TTAATTGCATGTTTCATTGAATTAGAAATGAGAACAATCAATTATTAATGAATTTTAAATATTTTTTACAGTATTATA |        |        |        |        |        |               |
| Candidatus Carsonella 135557 - 167442nt              | (31887)  | -----                                                                          |        |        |        |        |        |               |
| SARS-CoV-2 Reference Genome NC_045512.2              | (29904)  | -----                                                                          |        |        |        |        |        |               |

|                                                      |          |                                                                                |        |        |        |        |        |               |
|------------------------------------------------------|----------|--------------------------------------------------------------------------------|--------|--------|--------|--------|--------|---------------|
|                                                      |          | Section 2215                                                                   |        |        |        |        |        |               |
|                                                      | (170479) | 170479                                                                         | 170489 | 170500 | 170511 | 170522 | 170533 | 170544 170555 |
| Candidatus Carsonella ruddii strain BT chromosome... | (169937) | ATTATAATTAGGAACAATTCCACCTCTTAAAACAAATTGACAATTTTATTTCCTTTTGAAAATAAAATTTTGTAT    |        |        |        |        |        |               |
| Candidatus Carsonella 135557 - 167442nt              | (31887)  | -----                                                                          |        |        |        |        |        |               |
| SARS-CoV-2 Reference Genome NC_045512.2              | (29904)  | -----                                                                          |        |        |        |        |        |               |
|                                                      |          | Section 2216                                                                   |        |        |        |        |        |               |
|                                                      | (170556) | 170556                                                                         | 170566 | 170577 | 170588 | 170599 | 170610 | 170621 170632 |
| Candidatus Carsonella ruddii strain BT chromosome... | (170014) | TTTCAAAAAATGATAAAAAACAATGTTTATTTATAATAGATTTTAAAGAATCATTTAAAAAATAATATTTCCAGAT   |        |        |        |        |        |               |
| Candidatus Carsonella 135557 - 167442nt              | (31887)  | -----                                                                          |        |        |        |        |        |               |
| SARS-CoV-2 Reference Genome NC_045512.2              | (29904)  | -----                                                                          |        |        |        |        |        |               |
|                                                      |          | Section 2217                                                                   |        |        |        |        |        |               |
|                                                      | (170633) | 170633                                                                         | 170643 | 170654 | 170665 | 170676 | 170687 | 170698 170709 |
| Candidatus Carsonella ruddii strain BT chromosome... | (170091) | GAATCGTTTTTTTATTCCAATTATATTATTTATATTAGAACAAAATTCTCTATGAATTTGAGAATTCATTGTTCTAGC |        |        |        |        |        |               |
| Candidatus Carsonella 135557 - 167442nt              | (31887)  | -----                                                                          |        |        |        |        |        |               |
| SARS-CoV-2 Reference Genome NC_045512.2              | (29904)  | -----                                                                          |        |        |        |        |        |               |
|                                                      |          | Section 2218                                                                   |        |        |        |        |        |               |
|                                                      | (170710) | 170710                                                                         | 170720 | 170731 | 170742 | 170753 | 170764 | 170775 170786 |
| Candidatus Carsonella ruddii strain BT chromosome... | (170168) | ACCTATACATACCCATATTATGCAATCTATAAAATAATTTAAAAAATAAAAAATTAAACATTCTGTAGCTATATTAA  |        |        |        |        |        |               |
| Candidatus Carsonella 135557 - 167442nt              | (31887)  | -----                                                                          |        |        |        |        |        |               |
| SARS-CoV-2 Reference Genome NC_045512.2              | (29904)  | -----                                                                          |        |        |        |        |        |               |
|                                                      |          | Section 2219                                                                   |        |        |        |        |        |               |
|                                                      | (170787) | 170787                                                                         | 170797 | 170808 | 170819 | 170830 | 170841 | 170852 170863 |
| Candidatus Carsonella ruddii strain BT chromosome... | (170245) | TTTTTATATTAATTAAATCCAATAAAAAATCTTCTTATAATATAAATTCATCTAAAAATACAGAACTATTATTAATA  |        |        |        |        |        |               |
| Candidatus Carsonella 135557 - 167442nt              | (31887)  | -----                                                                          |        |        |        |        |        |               |
| SARS-CoV-2 Reference Genome NC_045512.2              | (29904)  | -----                                                                          |        |        |        |        |        |               |
|                                                      |          | Section 2220                                                                   |        |        |        |        |        |               |
|                                                      | (170864) | 170864                                                                         | 170874 | 170885 | 170896 | 170907 | 170918 | 170929 170940 |
| Candidatus Carsonella ruddii strain BT chromosome... | (170322) | TAAGGATCATAAACATAACCTTTCCAACCTATATTTGTTCTTGTTTTTCATAATAAACTCTAATTAAAAATTTCAA   |        |        |        |        |        |               |
| Candidatus Carsonella 135557 - 167442nt              | (31887)  | -----                                                                          |        |        |        |        |        |               |
| SARS-CoV-2 Reference Genome NC_045512.2              | (29904)  | -----                                                                          |        |        |        |        |        |               |

## SARS-CoV-2 &amp; Bakterien.apr

|                                                      |          |                                                                                 |              |        |        |        |        |        |        |
|------------------------------------------------------|----------|---------------------------------------------------------------------------------|--------------|--------|--------|--------|--------|--------|--------|
|                                                      |          |                                                                                 | Section 2221 |        |        |        |        |        |        |
|                                                      | (170941) | 170941                                                                          | 170951       | 170962 | 170973 | 170984 | 170995 | 171006 | 171017 |
| Candidatus Carsonella ruddii strain BT chromosome... | (170399) | ATTATAAAAAAATTTTTTTATTTTATTTATATATAAAAAATAATTCTTTTATGTTACTAAGTGAACATGGACCTATTA  |              |        |        |        |        |        |        |
| Candidatus Carsonella 135557 - 167442nt              | (31887)  | -----                                                                           |              |        |        |        |        |        |        |
| SARS-CoV-2 Reference Genome NC_045512.2              | (29904)  | -----                                                                           |              |        |        |        |        |        |        |
|                                                      |          |                                                                                 | Section 2222 |        |        |        |        |        |        |
|                                                      | (171018) | 171018                                                                          | 171028       | 171039 | 171050 | 171061 | 171072 | 171083 | 171094 |
| Candidatus Carsonella ruddii strain BT chromosome... | (170476) | TTATTATTAATTTTTTAAATTTTTTTTTTATTATTTCTTTGTAAATTTTAATGTTTAAACATTTTTATTAAACAAA    |              |        |        |        |        |        |        |
| Candidatus Carsonella 135557 - 167442nt              | (31887)  | -----                                                                           |              |        |        |        |        |        |        |
| SARS-CoV-2 Reference Genome NC_045512.2              | (29904)  | -----                                                                           |              |        |        |        |        |        |        |
|                                                      |          |                                                                                 | Section 2223 |        |        |        |        |        |        |
|                                                      | (171095) | 171095                                                                          | 171105       | 171116 | 171127 | 171138 | 171149 | 171160 | 171171 |
| Candidatus Carsonella ruddii strain BT chromosome... | (170553) | TCTTTTTTTAATCTTTTTAAATTTATTATTTTATACATATATTTTTTATATTTTTATTTAAAAAAAATCATTTTTTT   |              |        |        |        |        |        |        |
| Candidatus Carsonella 135557 - 167442nt              | (31887)  | -----                                                                           |              |        |        |        |        |        |        |
| SARS-CoV-2 Reference Genome NC_045512.2              | (29904)  | -----                                                                           |              |        |        |        |        |        |        |
|                                                      |          |                                                                                 | Section 2224 |        |        |        |        |        |        |
|                                                      | (171172) | 171172                                                                          | 171182       | 171193 | 171204 | 171215 | 171226 | 171237 | 171248 |
| Candidatus Carsonella ruddii strain BT chromosome... | (170630) | AAAAAAATTTTTTTTTTATTTATTTTTTTTTTACTCTTGATTTACTTTTAGATTTTTTAGTTTTTTGAACCGCCATGTT |              |        |        |        |        |        |        |
| Candidatus Carsonella 135557 - 167442nt              | (31887)  | -----                                                                           |              |        |        |        |        |        |        |
| SARS-CoV-2 Reference Genome NC_045512.2              | (29904)  | -----                                                                           |              |        |        |        |        |        |        |
|                                                      |          |                                                                                 | Section 2225 |        |        |        |        |        |        |
|                                                      | (171249) | 171249                                                                          | 171259       | 171270 | 171281 | 171292 | 171303 | 171314 | 171325 |
| Candidatus Carsonella ruddii strain BT chromosome... | (170707) | TGATAAAATAAATATTTTTATAAAAAACATTAGGATGCAACATAAATAATTTGGAATCTGAAAATTTTTTAAATTTTT  |              |        |        |        |        |        |        |
| Candidatus Carsonella 135557 - 167442nt              | (31887)  | -----                                                                           |              |        |        |        |        |        |        |
| SARS-CoV-2 Reference Genome NC_045512.2              | (29904)  | -----                                                                           |              |        |        |        |        |        |        |
|                                                      |          |                                                                                 | Section 2226 |        |        |        |        |        |        |
|                                                      | (171326) | 171326                                                                          | 171336       | 171347 | 171358 | 171369 | 171380 | 171391 | 171402 |
| Candidatus Carsonella ruddii strain BT chromosome... | (170784) | TAAAGTATTTTAAATAAAATTAATAAAAAAATTTTTTTAATTCAAATATATTAATTATTAATAGTTGTATTATAAGA   |              |        |        |        |        |        |        |
| Candidatus Carsonella 135557 - 167442nt              | (31887)  | -----                                                                           |              |        |        |        |        |        |        |
| SARS-CoV-2 Reference Genome NC_045512.2              | (29904)  | -----                                                                           |              |        |        |        |        |        |        |

## SARS-CoV-2 &amp; Bakterien.apr

|                                                      |          |                                                                                |        |        |        |        |        |               |
|------------------------------------------------------|----------|--------------------------------------------------------------------------------|--------|--------|--------|--------|--------|---------------|
|                                                      |          | Section 2227                                                                   |        |        |        |        |        |               |
|                                                      | (171403) | 171403                                                                         | 171413 | 171424 | 171435 | 171446 | 171457 | 171468 171479 |
| Candidatus Carsonella ruddii strain BT chromosome... | (170861) | AAAAATCCACAAATTAAATTTTAAAGAATTAAAAAATGGACTTTTTTAAAAAATATAAAAAAGTATAATTTT       |        |        |        |        |        |               |
| Candidatus Carsonella 135557 - 167442nt              | (31887)  | -----                                                                          |        |        |        |        |        |               |
| SARS-CoV-2 Reference Genome NC_045512.2              | (29904)  | -----                                                                          |        |        |        |        |        |               |
|                                                      |          | Section 2228                                                                   |        |        |        |        |        |               |
|                                                      | (171480) | 171480                                                                         | 171490 | 171501 | 171512 | 171523 | 171534 | 171545 171556 |
| Candidatus Carsonella ruddii strain BT chromosome... | (170938) | TTTAACTGGTTGTTTATCTGAATTTGAAAATTTTAAAAAATTAATTAATAAAAAATAGATATTATTATTAATTCTA   |        |        |        |        |        |               |
| Candidatus Carsonella 135557 - 167442nt              | (31887)  | -----                                                                          |        |        |        |        |        |               |
| SARS-CoV-2 Reference Genome NC_045512.2              | (29904)  | -----                                                                          |        |        |        |        |        |               |
|                                                      |          | Section 2229                                                                   |        |        |        |        |        |               |
|                                                      | (171557) | 171557                                                                         | 171567 | 171578 | 171589 | 171600 | 171611 | 171622 171633 |
| Candidatus Carsonella ruddii strain BT chromosome... | (171015) | ATTGTTACTTTTATTTAAAAAATAATATTATTTTATATTAAAAATAAAAAAATTTATTTTATAAAAAAACAA       |        |        |        |        |        |               |
| Candidatus Carsonella 135557 - 167442nt              | (31887)  | -----                                                                          |        |        |        |        |        |               |
| SARS-CoV-2 Reference Genome NC_045512.2              | (29904)  | -----                                                                          |        |        |        |        |        |               |
|                                                      |          | Section 2230                                                                   |        |        |        |        |        |               |
|                                                      | (171634) | 171634                                                                         | 171644 | 171655 | 171666 | 171677 | 171688 | 171699 171710 |
| Candidatus Carsonella ruddii strain BT chromosome... | (171092) | AAAAAATTTTTTTTAAAAAATAAAATTAATAATTACTTTTTTAATAATGAAAGGATGTAATCATAATTGCTCATATTG |        |        |        |        |        |               |
| Candidatus Carsonella 135557 - 167442nt              | (31887)  | -----                                                                          |        |        |        |        |        |               |
| SARS-CoV-2 Reference Genome NC_045512.2              | (29904)  | -----                                                                          |        |        |        |        |        |               |
|                                                      |          | Section 2231                                                                   |        |        |        |        |        |               |
|                                                      | (171711) | 171711                                                                         | 171721 | 171732 | 171743 | 171754 | 171765 | 171776 171787 |
| Candidatus Carsonella ruddii strain BT chromosome... | (171169) | TGTAATACCTCAAATAAAAGGAAAAGAAGATTTTTTCTTACAAAAAATATTTTTTAATATTTTGAATAATATAA     |        |        |        |        |        |               |
| Candidatus Carsonella 135557 - 167442nt              | (31887)  | -----                                                                          |        |        |        |        |        |               |
| SARS-CoV-2 Reference Genome NC_045512.2              | (29904)  | -----                                                                          |        |        |        |        |        |               |
|                                                      |          | Section 2232                                                                   |        |        |        |        |        |               |
|                                                      | (171788) | 171788                                                                         | 171798 | 171809 | 171820 | 171831 | 171842 | 171853 171864 |
| Candidatus Carsonella ruddii strain BT chromosome... | (171246) | AAACATTTTTTTGTGAAATAACTTTATTAGGTCAAAATGTAAATCTTATTATTATAAAAAATATTGATTTTAATTCT  |        |        |        |        |        |               |
| Candidatus Carsonella 135557 - 167442nt              | (31887)  | -----                                                                          |        |        |        |        |        |               |
| SARS-CoV-2 Reference Genome NC_045512.2              | (29904)  | -----                                                                          |        |        |        |        |        |               |

## SARS-CoV-2 &amp; Bakterien.apr

|                                                      |          |                                                                                 |        |        |        |        |        |
|------------------------------------------------------|----------|---------------------------------------------------------------------------------|--------|--------|--------|--------|--------|
| Section 2233                                         |          |                                                                                 |        |        |        |        |        |
| Candidatus Carsonella ruddii strain BT chromosome... | (171865) | 171865                                                                          | 171875 | 171886 | 171897 | 171908 | 171919 |
| Candidatus Carsonella 135557 - 167442nt              | (171323) | TTAATATTTAATTTATCAAAAATTAAAAATATTAAAAAGAATAAATTTTTTATCTTCAAATATAAAAAGATTTTAATAA |        |        |        |        |        |
| SARS-CoV-2 Reference Genome NC_045512.2              | (31887)  | -----                                                                           |        |        |        |        |        |
|                                                      | (29904)  | -----                                                                           |        |        |        |        |        |
| Section 2234                                         |          |                                                                                 |        |        |        |        |        |
| Candidatus Carsonella ruddii strain BT chromosome... | (171942) | 171942                                                                          | 171952 | 171963 | 171974 | 171985 | 171996 |
| Candidatus Carsonella 135557 - 167442nt              | (171400) | AAATTTTTTTTTCTTATATAAAAAATATTAATAAAATTCATCACATATTCATTTACCAGTTCAATCTGGATCTAATA   |        |        |        |        |        |
| SARS-CoV-2 Reference Genome NC_045512.2              | (31887)  | -----                                                                           |        |        |        |        |        |
|                                                      | (29904)  | -----                                                                           |        |        |        |        |        |
| Section 2235                                         |          |                                                                                 |        |        |        |        |        |
| Candidatus Carsonella ruddii strain BT chromosome... | (172019) | 172019                                                                          | 172029 | 172040 | 172051 | 172062 | 172073 |
| Candidatus Carsonella 135557 - 167442nt              | (171477) | AAATTTTAAAAAAAATGAATAGAAAATATACTATTAATGAGTATTTATATTTTATAAAAAAATAAAAAAATAAAA     |        |        |        |        |        |
| SARS-CoV-2 Reference Genome NC_045512.2              | (31887)  | -----                                                                           |        |        |        |        |        |
|                                                      | (29904)  | -----                                                                           |        |        |        |        |        |
| Section 2236                                         |          |                                                                                 |        |        |        |        |        |
| Candidatus Carsonella ruddii strain BT chromosome... | (172096) | 172096                                                                          | 172106 | 172117 | 172128 | 172139 | 172150 |
| Candidatus Carsonella 135557 - 167442nt              | (171554) | AAAACATCTTTTTCAACTGATATTATTATATCTTTTCCTTATGAAAAATTAATAGATTTTGATTATCAATTAAAAAT   |        |        |        |        |        |
| SARS-CoV-2 Reference Genome NC_045512.2              | (31887)  | -----                                                                           |        |        |        |        |        |
|                                                      | (29904)  | -----                                                                           |        |        |        |        |        |
| Section 2237                                         |          |                                                                                 |        |        |        |        |        |
| Candidatus Carsonella ruddii strain BT chromosome... | (172173) | 172173                                                                          | 172183 | 172194 | 172205 | 172216 | 172227 |
| Candidatus Carsonella 135557 - 167442nt              | (171631) | AATAAAAAAATTAAATTTACAGATATTTTTTTTTTTCTTATTCAAAAAAGAATAAACACAATTTCTTTTAATTTTA    |        |        |        |        |        |
| SARS-CoV-2 Reference Genome NC_045512.2              | (31887)  | -----                                                                           |        |        |        |        |        |
|                                                      | (29904)  | -----                                                                           |        |        |        |        |        |
| Section 2238                                         |          |                                                                                 |        |        |        |        |        |
| Candidatus Carsonella ruddii strain BT chromosome... | (172250) | 172250                                                                          | 172260 | 172271 | 172282 | 172293 | 172304 |
| Candidatus Carsonella 135557 - 167442nt              | (171708) | AAAAAAAAGATTTATTAAAAAATTTAAATTGAAAAATTTTCAAAAAATATTAAAAATAATTTTTTTTTTAATAAA     |        |        |        |        |        |
| SARS-CoV-2 Reference Genome NC_045512.2              | (31887)  | -----                                                                           |        |        |        |        |        |
|                                                      | (29904)  | -----                                                                           |        |        |        |        |        |

## SARS-CoV-2 &amp; Bakterien.apr

|                                                      |          |                                                                               |        |        |        |        |        |               |
|------------------------------------------------------|----------|-------------------------------------------------------------------------------|--------|--------|--------|--------|--------|---------------|
|                                                      |          | Section 2239                                                                  |        |        |        |        |        |               |
|                                                      | (172327) | 172327                                                                        | 172337 | 172348 | 172359 | 172370 | 172381 | 172392 172403 |
| Candidatus Carsonella ruddii strain BT chromosome... | (171785) | AACGAAAGAGTATTAGTTATTGGATATTTAAAAAAATATTTTATAGGAAAACTGATAGTTTAAAAATAGTTTT     |        |        |        |        |        |               |
| Candidatus Carsonella 135557 - 167442nt              | (31887)  | -----                                                                         |        |        |        |        |        |               |
| SARS-CoV-2 Reference Genome NC_045512.2              | (29904)  | -----                                                                         |        |        |        |        |        |               |
|                                                      |          | Section 2240                                                                  |        |        |        |        |        |               |
|                                                      | (172404) | 172404                                                                        | 172414 | 172425 | 172436 | 172447 | 172458 | 172469 172480 |
| Candidatus Carsonella ruddii strain BT chromosome... | (171862) | TTTTGAATATTTTAATTATAATATTATAGGAAAAATTTTATTAATAAAAAATAATAAATATTAAAAAAATTTTTTTT |        |        |        |        |        |               |
| Candidatus Carsonella 135557 - 167442nt              | (31887)  | -----                                                                         |        |        |        |        |        |               |
| SARS-CoV-2 Reference Genome NC_045512.2              | (29904)  | -----                                                                         |        |        |        |        |        |               |
|                                                      |          | Section 2241                                                                  |        |        |        |        |        |               |
|                                                      | (172481) | 172481                                                                        | 172491 | 172502 | 172513 | 172524 | 172535 | 172546 172557 |
| Candidatus Carsonella ruddii strain BT chromosome... | (171939) | TAGGAATATATGAAAGTATATATTCAAATATATAGTTTTTACAAATTAAATTTTAAATAAAATTTAAACAAAAAA   |        |        |        |        |        |               |
| Candidatus Carsonella 135557 - 167442nt              | (31887)  | -----                                                                         |        |        |        |        |        |               |
| SARS-CoV-2 Reference Genome NC_045512.2              | (29904)  | -----                                                                         |        |        |        |        |        |               |
|                                                      |          | Section 2242                                                                  |        |        |        |        |        |               |
|                                                      | (172558) | 172558                                                                        | 172568 | 172579 | 172590 | 172601 | 172612 | 172623 172634 |
| Candidatus Carsonella ruddii strain BT chromosome... | (172016) | TATTTTAAAAATAATTATAATTATTAAAAAAACCTTTAATTATTTTAATCATAAAAAATATTATTTTGTAATA     |        |        |        |        |        |               |
| Candidatus Carsonella 135557 - 167442nt              | (31887)  | -----                                                                         |        |        |        |        |        |               |
| SARS-CoV-2 Reference Genome NC_045512.2              | (29904)  | -----                                                                         |        |        |        |        |        |               |
|                                                      |          | Section 2243                                                                  |        |        |        |        |        |               |
|                                                      | (172635) | 172635                                                                        | 172645 | 172656 | 172667 | 172678 | 172689 | 172700 172711 |
| Candidatus Carsonella ruddii strain BT chromosome... | (172093) | ATTATTATAAAAAAAATTAATAATGATAATTCATTTTGTAAATTTATTTTTTTTAAATCACAGTATAAAACAT     |        |        |        |        |        |               |
| Candidatus Carsonella 135557 - 167442nt              | (31887)  | -----                                                                         |        |        |        |        |        |               |
| SARS-CoV-2 Reference Genome NC_045512.2              | (29904)  | -----                                                                         |        |        |        |        |        |               |
|                                                      |          | Section 2244                                                                  |        |        |        |        |        |               |
|                                                      | (172712) | 172712                                                                        | 172722 | 172733 | 172744 | 172755 | 172766 | 172777 172788 |
| Candidatus Carsonella ruddii strain BT chromosome... | (172170) | TTTTTAAAAATTAATCATAAATCAATTATAGAAAAATAAATTAATGATATATTTAAAAATCCATTATTTATTGAAA  |        |        |        |        |        |               |
| Candidatus Carsonella 135557 - 167442nt              | (31887)  | -----                                                                         |        |        |        |        |        |               |
| SARS-CoV-2 Reference Genome NC_045512.2              | (29904)  | -----                                                                         |        |        |        |        |        |               |

## SARS-CoV-2 &amp; Bakterien.apr

|                                                      |          |                                                                                 |        |        |        |        |        |               |
|------------------------------------------------------|----------|---------------------------------------------------------------------------------|--------|--------|--------|--------|--------|---------------|
|                                                      |          | Section 2245                                                                    |        |        |        |        |        |               |
|                                                      | (172789) | 172789                                                                          | 172799 | 172810 | 172821 | 172832 | 172843 | 172854 172865 |
| Candidatus Carsonella ruddii strain BT chromosome... | (172247) | ATAAAAATAAATAAAAAATTTAAAAATTATAAAAAATTGTAAAAAATTTTTTTGTTTACCTATGTTTCCGTATCCTAGT |        |        |        |        |        |               |
| Candidatus Carsonella 135557 - 167442nt              | (31887)  | -----                                                                           |        |        |        |        |        |               |
| SARS-CoV-2 Reference Genome NC_045512.2              | (29904)  | -----                                                                           |        |        |        |        |        |               |
|                                                      |          | Section 2246                                                                    |        |        |        |        |        |               |
|                                                      | (172866) | 172866                                                                          | 172876 | 172887 | 172898 | 172909 | 172920 | 172931 172942 |
| Candidatus Carsonella ruddii strain BT chromosome... | (172324) | GGAAAATTACATTTAGGACACGTTAGAAATTATATTTTAAACAGATATAATTTCTAAAAATTAAAAATTTAGAAAAAAA |        |        |        |        |        |               |
| Candidatus Carsonella 135557 - 167442nt              | (31887)  | -----                                                                           |        |        |        |        |        |               |
| SARS-CoV-2 Reference Genome NC_045512.2              | (29904)  | -----                                                                           |        |        |        |        |        |               |
|                                                      |          | Section 2247                                                                    |        |        |        |        |        |               |
|                                                      | (172943) | 172943                                                                          | 172953 | 172964 | 172975 | 172986 | 172997 | 173008 173019 |
| Candidatus Carsonella ruddii strain BT chromosome... | (172401) | AACAGTAATACACCCTATGGGATGGGATTTCATTTGGATTACCTGCAGAAAATGCTTCTAAAAAATTAAATTTAAATT  |        |        |        |        |        |               |
| Candidatus Carsonella 135557 - 167442nt              | (31887)  | -----                                                                           |        |        |        |        |        |               |
| SARS-CoV-2 Reference Genome NC_045512.2              | (29904)  | -----                                                                           |        |        |        |        |        |               |
|                                                      |          | Section 2248                                                                    |        |        |        |        |        |               |
|                                                      | (173020) | 173020                                                                          | 173030 | 173041 | 173052 | 173063 | 173074 | 173085 173096 |
| Candidatus Carsonella ruddii strain BT chromosome... | (172478) | CTTTAAAAATGGACATTATCAAATATAAAATTAATGAAAAACCAATTAATAATTTTACAAATTAATTACTCTAAAAAA  |        |        |        |        |        |               |
| Candidatus Carsonella 135557 - 167442nt              | (31887)  | -----                                                                           |        |        |        |        |        |               |
| SARS-CoV-2 Reference Genome NC_045512.2              | (29904)  | -----                                                                           |        |        |        |        |        |               |
|                                                      |          | Section 2249                                                                    |        |        |        |        |        |               |
|                                                      | (173097) | 173097                                                                          | 173107 | 173118 | 173129 | 173140 | 173151 | 173162 173173 |
| Candidatus Carsonella ruddii strain BT chromosome... | (172555) | TTAGAGTTTTTAACTTGTGATGTTAATTTTATAAATGGGAATTTTGGATATTGTTATATTTTATAAAAAACAAATT    |        |        |        |        |        |               |
| Candidatus Carsonella 135557 - 167442nt              | (31887)  | -----                                                                           |        |        |        |        |        |               |
| SARS-CoV-2 Reference Genome NC_045512.2              | (29904)  | -----                                                                           |        |        |        |        |        |               |
|                                                      |          | Section 2250                                                                    |        |        |        |        |        |               |
|                                                      | (173174) | 173174                                                                          | 173184 | 173195 | 173206 | 173217 | 173228 | 173239 173250 |
| Candidatus Carsonella ruddii strain BT chromosome... | (172632) | ATTATTAAAACAATATGATGAAATATATTGGGATAAAATTCACAATGTATTTTATCTAATGAACAAATAAATGATA    |        |        |        |        |        |               |
| Candidatus Carsonella 135557 - 167442nt              | (31887)  | -----                                                                           |        |        |        |        |        |               |
| SARS-CoV-2 Reference Genome NC_045512.2              | (29904)  | -----                                                                           |        |        |        |        |        |               |

## SARS-CoV-2 &amp; Bakterien.apr

|                                                      |          |                                                                                |        |        |        |        |        |               |
|------------------------------------------------------|----------|--------------------------------------------------------------------------------|--------|--------|--------|--------|--------|---------------|
|                                                      |          | Section 2251                                                                   |        |        |        |        |        |               |
|                                                      | (173251) | 173251                                                                         | 173261 | 173272 | 173283 | 173294 | 173305 | 173316 173327 |
| Candidatus Carsonella ruddii strain BT chromosome... | (172709) | ATTTATGTTGGAGATCTAATTGTAAACCCATCAAAATTAAAAATTTTACTTGGTTTATAAATATTAAAAAATATACA  |        |        |        |        |        |               |
| Candidatus Carsonella 135557 - 167442nt              | (31887)  | -----                                                                          |        |        |        |        |        |               |
| SARS-CoV-2 Reference Genome NC_045512.2              | (29904)  | -----                                                                          |        |        |        |        |        |               |
|                                                      |          | Section 2252                                                                   |        |        |        |        |        |               |
|                                                      | (173328) | 173328                                                                         | 173338 | 173349 | 173360 | 173371 | 173382 | 173393 173404 |
| Candidatus Carsonella ruddii strain BT chromosome... | (172786) | AAAAAATTAATTTTAAATTTAAAAAATATTAATTGGTCTAAAAAAATAAAAATATACAAAAAAATGGATAAATAT    |        |        |        |        |        |               |
| Candidatus Carsonella 135557 - 167442nt              | (31887)  | -----                                                                          |        |        |        |        |        |               |
| SARS-CoV-2 Reference Genome NC_045512.2              | (29904)  | -----                                                                          |        |        |        |        |        |               |
|                                                      |          | Section 2253                                                                   |        |        |        |        |        |               |
|                                                      | (173405) | 173405                                                                         | 173415 | 173426 | 173437 | 173448 | 173459 | 173470 173481 |
| Candidatus Carsonella ruddii strain BT chromosome... | (172863) | AAAATTTTATTAAATTAGAAATATAAAATTTTATTCAATTTATAATTATTATTATATTAATATTAATAATATTTAAAA |        |        |        |        |        |               |
| Candidatus Carsonella 135557 - 167442nt              | (31887)  | -----                                                                          |        |        |        |        |        |               |
| SARS-CoV-2 Reference Genome NC_045512.2              | (29904)  | -----                                                                          |        |        |        |        |        |               |
|                                                      |          | Section 2254                                                                   |        |        |        |        |        |               |
|                                                      | (173482) | 173482                                                                         | 173492 | 173503 | 173514 | 173525 | 173536 | 173547 173558 |
| Candidatus Carsonella ruddii strain BT chromosome... | (172940) | AAATAATAAATTTAAAAATATTATATTTATTAATTAAAAAATAAATTTTATTTAAAAAATAATTTTATA          |        |        |        |        |        |               |
| Candidatus Carsonella 135557 - 167442nt              | (31887)  | -----                                                                          |        |        |        |        |        |               |
| SARS-CoV-2 Reference Genome NC_045512.2              | (29904)  | -----                                                                          |        |        |        |        |        |               |
|                                                      |          | Section 2255                                                                   |        |        |        |        |        |               |
|                                                      | (173559) | 173559                                                                         | 173569 | 173580 | 173591 | 173602 | 173613 | 173624 173635 |
| Candidatus Carsonella ruddii strain BT chromosome... | (173017) | AATGATAATTTATTAAAAATTAATAAATAAATTTTACTAATTTTAAATTTAAATTTAAATAAATAATTTTAAAGA    |        |        |        |        |        |               |
| Candidatus Carsonella 135557 - 167442nt              | (31887)  | -----                                                                          |        |        |        |        |        |               |
| SARS-CoV-2 Reference Genome NC_045512.2              | (29904)  | -----                                                                          |        |        |        |        |        |               |
|                                                      |          | Section 2256                                                                   |        |        |        |        |        |               |
|                                                      | (173636) | 173636                                                                         | 173646 | 173657 | 173668 | 173679 | 173690 | 173701 173712 |
| Candidatus Carsonella ruddii strain BT chromosome... | (173094) | AGAAATTAATTTTAAATTTGTAAAAAATAATTTTATATAAAAAACAAATATTAATAATTGGGCTTTTATAA        |        |        |        |        |        |               |
| Candidatus Carsonella 135557 - 167442nt              | (31887)  | -----                                                                          |        |        |        |        |        |               |
| SARS-CoV-2 Reference Genome NC_045512.2              | (29904)  | -----                                                                          |        |        |        |        |        |               |



## SARS-CoV-2 &amp; Bakterien.apr

|                                                      |          |                                                                               |              |        |        |        |        |        |        |
|------------------------------------------------------|----------|-------------------------------------------------------------------------------|--------------|--------|--------|--------|--------|--------|--------|
|                                                      |          |                                                                               | Section 2257 |        |        |        |        |        |        |
|                                                      | (173713) | 173713                                                                        | 173723       | 173734 | 173745 | 173756 | 173767 | 173778 | 173789 |
| Candidatus Carsonella ruddii strain BT chromosome... | (173171) | GACAACGTTTATGGGGATCTCCTTTTTTTTATAAAAAAATTAAAAACAAAAATTTTAAATCAAAATTGACAATTGAT |              |        |        |        |        |        |        |
| Candidatus Carsonella 135557 - 167442nt              | (31887)  | -----                                                                         |              |        |        |        |        |        |        |
| SARS-CoV-2 Reference Genome NC_045512.2              | (29904)  | -----                                                                         |              |        |        |        |        |        |        |
|                                                      |          |                                                                               | Section 2258 |        |        |        |        |        |        |
|                                                      | (173790) | 173790                                                                        | 173800       | 173811 | 173822 | 173833 | 173844 | 173855 | 173866 |
| Candidatus Carsonella ruddii strain BT chromosome... | (173248) | ACTTTTTTTCAATCTTCTTGGTATTATATTTATTTTAAAAATCATTAAATTTAACAAATAAATTTAAAAATGATTG  |              |        |        |        |        |        |        |
| Candidatus Carsonella 135557 - 167442nt              | (31887)  | -----                                                                         |              |        |        |        |        |        |        |
| SARS-CoV-2 Reference Genome NC_045512.2              | (29904)  | -----                                                                         |              |        |        |        |        |        |        |
|                                                      |          |                                                                               | Section 2259 |        |        |        |        |        |        |
|                                                      | (173867) | 173867                                                                        | 173877       | 173888 | 173899 | 173910 | 173921 | 173932 | 173943 |
| Candidatus Carsonella ruddii strain BT chromosome... | (173325) | GTTTCCAATAAATATTTATGTTGGAGGAATAGAACATGCAAATTTACATTTACTTTATTTAAGAATAATAAATTTTA |              |        |        |        |        |        |        |
| Candidatus Carsonella 135557 - 167442nt              | (31887)  | -----                                                                         |              |        |        |        |        |        |        |
| SARS-CoV-2 Reference Genome NC_045512.2              | (29904)  | -----                                                                         |              |        |        |        |        |        |        |
|                                                      |          |                                                                               | Section 2260 |        |        |        |        |        |        |
|                                                      | (173944) | 173944                                                                        | 173954       | 173965 | 173976 | 173987 | 173998 | 174009 | 174020 |
| Candidatus Carsonella ruddii strain BT chromosome... | (173402) | TATTTTATGATTTAAATATTATTGATAAAAAAATGTTATTTTAAATTTAATTAATCAAGGTTTTATAAATAATGAA  |              |        |        |        |        |        |        |
| Candidatus Carsonella 135557 - 167442nt              | (31887)  | -----                                                                         |              |        |        |        |        |        |        |
| SARS-CoV-2 Reference Genome NC_045512.2              | (29904)  | -----                                                                         |              |        |        |        |        |        |        |
|                                                      |          |                                                                               | Section 2261 |        |        |        |        |        |        |
|                                                      | (174021) | 174021                                                                        | 174031       | 174042 | 174053 | 174064 | 174075 | 174086 | 174097 |
| Candidatus Carsonella ruddii strain BT chromosome... | (173479) | GTTTATTTTAAATTTAAATTTTAAAAAATTTTTTGCAAAAAAATAAAAAAGCATTTTATAGGTGGAATTGAAAA    |              |        |        |        |        |        |        |
| Candidatus Carsonella 135557 - 167442nt              | (31887)  | -----                                                                         |              |        |        |        |        |        |        |
| SARS-CoV-2 Reference Genome NC_045512.2              | (29904)  | -----                                                                         |              |        |        |        |        |        |        |
|                                                      |          |                                                                               | Section 2262 |        |        |        |        |        |        |
|                                                      | (174098) | 174098                                                                        | 174108       | 174119 | 174130 | 174141 | 174152 | 174163 | 174174 |
| Candidatus Carsonella ruddii strain BT chromosome... | (173556) | AATGTCAAAATCAAAAAAATGGAATAAACCCAATATATTTAATAAATAAATTTGGATCAGATATATTAAATTTAT   |              |        |        |        |        |        |        |
| Candidatus Carsonella 135557 - 167442nt              | (31887)  | -----                                                                         |              |        |        |        |        |        |        |
| SARS-CoV-2 Reference Genome NC_045512.2              | (29904)  | -----                                                                         |              |        |        |        |        |        |        |

## SARS-CoV-2 &amp; Bakterien.apr

|                                                      |          |                                                                               |        |        |        |        |        |               |
|------------------------------------------------------|----------|-------------------------------------------------------------------------------|--------|--------|--------|--------|--------|---------------|
|                                                      |          | Section 2263                                                                  |        |        |        |        |        |               |
|                                                      | (174175) | 174175                                                                        | 174185 | 174196 | 174207 | 174218 | 174229 | 174240 174251 |
| Candidatus Carsonella ruddii strain BT chromosome... | (173633) | CTATTATTACAAATAAACCAATAGACAAAAATATAAATTGGGGAAATATAAATTTTTTTTCAATTAAAAAATTTATA |        |        |        |        |        |               |
| Candidatus Carsonella 135557 - 167442nt              | (31887)  | -----                                                                         |        |        |        |        |        |               |
| SARS-CoV-2 Reference Genome NC_045512.2              | (29904)  | -----                                                                         |        |        |        |        |        |               |
|                                                      |          | Section 2264                                                                  |        |        |        |        |        |               |
|                                                      | (174252) | 174252                                                                        | 174262 | 174273 | 174284 | 174295 | 174306 | 174317 174328 |
| Candidatus Carsonella ruddii strain BT chromosome... | (173710) | TTAAAAATTAATAATTTAATAGAAATAAAAATAATTAATATTAAAGAAATAATTAATATTAAAGAAATAATTAATAT |        |        |        |        |        |               |
| Candidatus Carsonella 135557 - 167442nt              | (31887)  | -----                                                                         |        |        |        |        |        |               |
| SARS-CoV-2 Reference Genome NC_045512.2              | (29904)  | -----                                                                         |        |        |        |        |        |               |
|                                                      |          | Section 2265                                                                  |        |        |        |        |        |               |
|                                                      | (174329) | 174329                                                                        | 174339 | 174350 | 174361 | 174372 | 174383 | 174394 174405 |
| Candidatus Carsonella ruddii strain BT chromosome... | (173787) | TAAAAAATACATAATGTAATTTCTTATATTAATAAAATTTTAATTTATAATAATTCAATAAAACAAATAGAAAATA  |        |        |        |        |        |               |
| Candidatus Carsonella 135557 - 167442nt              | (31887)  | -----                                                                         |        |        |        |        |        |               |
| SARS-CoV-2 Reference Genome NC_045512.2              | (29904)  | -----                                                                         |        |        |        |        |        |               |
|                                                      |          | Section 2266                                                                  |        |        |        |        |        |               |
|                                                      | (174406) | 174406                                                                        | 174416 | 174427 | 174446 |        |        |               |
| Candidatus Carsonella ruddii strain BT chromosome... | (173864) | TTATTTTTTTGGTTGTTTCCAATTATACCAAATATTTCTAAA                                    |        |        |        |        |        |               |
| Candidatus Carsonella 135557 - 167442nt              | (31887)  | -----                                                                         |        |        |        |        |        |               |
| SARS-CoV-2 Reference Genome NC_045512.2              | (29904)  | -----                                                                         |        |        |        |        |        |               |
