# Supplementary material for: Ubiquitous Micro-Modular Homologies among Genomes from Viruses to Bacteria to Human Mitochondrial DNA: Platforms for Recombination during Evolution?
Source: MDPI journal article supplement (doi:10.3390/v14050885), 2022-04-24
Supplement: s1 [file s1]

SARS-CoV-2 & HIV-1.apr

|                                      |       |                                                                                                    |     |     |     |     |     |     |     |     |     |
|--------------------------------------|-------|----------------------------------------------------------------------------------------------------|-----|-----|-----|-----|-----|-----|-----|-----|-----|
|                                      |       | Section 1                                                                                          |     |     |     |     |     |     |     |     |     |
| HIV-1 HXB2<br>SARS-CoV-2 NC_045512.2 | (1)   | 1                                                                                                  | 10  | 20  | 30  | 40  | 50  | 60  | 70  | 80  | 97  |
|                                      | (1)   | -----                                                                                              |     |     |     |     |     |     |     |     |     |
|                                      | (1)   | ATTAAAGGTTTATACCTTCCCAGGTAACAAACCAACCAACTTTCGATCTCTTGTAGATCTGTTCTCTAAACGAACTTTAAAATCTGTGTGGCTGTCA  |     |     |     |     |     |     |     |     |     |
|                                      |       | Section 2                                                                                          |     |     |     |     |     |     |     |     |     |
| HIV-1 HXB2<br>SARS-CoV-2 NC_045512.2 | (98)  | 98                                                                                                 | 110 | 120 | 130 | 140 | 150 | 160 | 170 | 180 | 194 |
|                                      | (1)   | -----                                                                                              |     |     |     |     |     |     |     |     |     |
|                                      | (98)  | CTCGGCTGCATGCTTAGTGCACTCACGCAGTATAATTAATAACTAATTACTGTCGTTGACAGGACACGAGTAACTCGTCTATCTTCTGCAGGCTGCT  |     |     |     |     |     |     |     |     |     |
|                                      |       | Section 3                                                                                          |     |     |     |     |     |     |     |     |     |
| HIV-1 HXB2<br>SARS-CoV-2 NC_045512.2 | (195) | 195                                                                                                | 200 | 210 | 220 | 230 | 240 | 250 | 260 | 270 | 291 |
|                                      | (1)   | -----                                                                                              |     |     |     |     |     |     |     |     |     |
|                                      | (195) | TACGGTTTCGTCCGTGTTGCAGCCGATCATCAGCACATCTAGGTTTTCGTCCGGGTGTGACCGAAAGGTAAGATGGAGAGCCTTGTCCTGGTTTCAA  |     |     |     |     |     |     |     |     |     |
|                                      |       | Section 4                                                                                          |     |     |     |     |     |     |     |     |     |
| HIV-1 HXB2<br>SARS-CoV-2 NC_045512.2 | (292) | 292                                                                                                | 300 | 310 | 320 | 330 | 340 | 350 | 360 | 370 | 388 |
|                                      | (1)   | -----                                                                                              |     |     |     |     |     |     |     |     |     |
|                                      | (292) | CGAGAAAACACACGTCCAACCTCAGTTTGCTGTTTTACAGGTTTCGCGACGTGCTCGTACGTGGCTTTGGAGACTCCGTGGAGGAGGTCTTATCAGAG |     |     |     |     |     |     |     |     |     |
|                                      |       | Section 5                                                                                          |     |     |     |     |     |     |     |     |     |
| HIV-1 HXB2<br>SARS-CoV-2 NC_045512.2 | (389) | 389                                                                                                | 400 | 410 | 420 | 430 | 440 | 450 | 460 | 470 | 485 |
|                                      | (1)   | -----                                                                                              |     |     |     |     |     |     |     |     |     |
|                                      | (389) | GCACGTCAACATCTTAAAGATGGCACTTGTGGCTTAGTAGAAGTTGAAAAAGGCGTTTTGCCTCAACTTGAACAGCCCTATGTGTTTCATCAAACGTT |     |     |     |     |     |     |     |     |     |
|                                      |       | Section 6                                                                                          |     |     |     |     |     |     |     |     |     |
| HIV-1 HXB2<br>SARS-CoV-2 NC_045512.2 | (486) | 486                                                                                                | 500 | 510 | 520 | 530 | 540 | 550 | 560 | 570 | 582 |
|                                      | (1)   | -----                                                                                              |     |     |     |     |     |     |     |     |     |
|                                      | (486) | CGGATGCTCGAACTGCACCTCATGGTCATGTTATGGTTGAGCTGGTAGCAGAACTCGAAGGCATTTCAGTACGGTCGTAGTGGTGAGACACTTGGTGT |     |     |     |     |     |     |     |     |     |
|                                      |       | Section 7                                                                                          |     |     |     |     |     |     |     |     |     |
| HIV-1 HXB2<br>SARS-CoV-2 NC_045512.2 | (583) | 583                                                                                                | 590 | 600 | 610 | 620 | 630 | 640 | 650 | 660 | 679 |
|                                      | (1)   | -----                                                                                              |     |     |     |     |     |     |     |     |     |
|                                      | (583) | CCTTGTCCTCATGTGGGCGAAATACCAGTGGCTTACCGCAAGGTTCTTCTTCGTAAGAACGGTAATAAAGGAGCTGGTGGCCATAGTTACGGCGCC   |     |     |     |     |     |     |     |     |     |

SARS-CoV-2 & HIV-1.apr

|                                      |        |                                                                                                    |      |      |      |      |      |      |      |      |      |
|--------------------------------------|--------|----------------------------------------------------------------------------------------------------|------|------|------|------|------|------|------|------|------|
|                                      |        | Section 8                                                                                          |      |      |      |      |      |      |      |      |      |
| HIV-1 HXB2<br>SARS-CoV-2 NC_045512.2 | (680)  | 680                                                                                                | 690  | 700  | 710  | 720  | 730  | 740  | 750  | 760  | 776  |
|                                      | (1)    | -----                                                                                              |      |      |      |      |      |      |      |      |      |
|                                      | (680)  | GATCTAAAGTCATTTGACTTAGGCGACGAGCTTGGCACTGATCCTTATGAAGATTTTCAAGAAAACCTGGAACACTAAACATAGCAGTGGTGTTACCC |      |      |      |      |      |      |      |      |      |
|                                      |        | Section 9                                                                                          |      |      |      |      |      |      |      |      |      |
| HIV-1 HXB2<br>SARS-CoV-2 NC_045512.2 | (777)  | 777                                                                                                | 790  | 800  | 810  | 820  | 830  | 840  | 850  | 860  | 873  |
|                                      | (1)    | -----                                                                                              |      |      |      |      |      |      |      |      |      |
|                                      | (777)  | GTGAACTCATGCGTGAGCTTAACGGAGGGGCATACACTCGCTATGTCGATAACAACCTTCTGTGGCCCTGATGGCTACCCTCTTGAGTGCATTAAAGA |      |      |      |      |      |      |      |      |      |
|                                      |        | Section 10                                                                                         |      |      |      |      |      |      |      |      |      |
| HIV-1 HXB2<br>SARS-CoV-2 NC_045512.2 | (874)  | 874                                                                                                | 880  | 890  | 900  | 910  | 920  | 930  | 940  | 950  | 970  |
|                                      | (1)    | -----                                                                                              |      |      |      |      |      |      |      |      |      |
|                                      | (874)  | CCTTCTAGCACGTGCTGGTAAAGCTTCATGCACTTTGTCCGAACAACCTGGACTTTATTGACACTAAGAGGGGTGTATACTGCTGCCGTGAACATGAG |      |      |      |      |      |      |      |      |      |
|                                      |        | Section 11                                                                                         |      |      |      |      |      |      |      |      |      |
| HIV-1 HXB2<br>SARS-CoV-2 NC_045512.2 | (971)  | 971                                                                                                | 980  | 990  | 1000 | 1010 | 1020 | 1030 | 1040 | 1050 | 1067 |
|                                      | (1)    | -----                                                                                              |      |      |      |      |      |      |      |      |      |
|                                      | (971)  | CATGAAATTGCTTGGTACACGGAACGTTCTGAAAAGAGCTATGAATTGCAGACACCTTTTGAAATTAAATTGGCAAAGAAATTTGACACCTTCAATG  |      |      |      |      |      |      |      |      |      |
|                                      |        | Section 12                                                                                         |      |      |      |      |      |      |      |      |      |
| HIV-1 HXB2<br>SARS-CoV-2 NC_045512.2 | (1068) | 1068                                                                                               | 1080 | 1090 | 1100 | 1110 | 1120 | 1130 | 1140 | 1150 | 1164 |
|                                      | (1)    | -----                                                                                              |      |      |      |      |      |      |      |      |      |
|                                      | (1068) | GGGAATGTCCAAATTTTGTATTTCCCTTAAATTCCATAATCAAGACTATTCAACCAAGGGTTGAAAAGAAAAGCTTGATGGCTTTATGGGTAGAAT   |      |      |      |      |      |      |      |      |      |
|                                      |        | Section 13                                                                                         |      |      |      |      |      |      |      |      |      |
| HIV-1 HXB2<br>SARS-CoV-2 NC_045512.2 | (1165) | 1165                                                                                               | 1170 | 1180 | 1190 | 1200 | 1210 | 1220 | 1230 | 1240 | 1261 |
|                                      | (1)    | -----                                                                                              |      |      |      |      |      |      |      |      |      |
|                                      | (1165) | TCGATCTGTCTATCCAGTTGCGTCACCAAATGAATGCAACCAAATGTGCCTTTCAACTCTCATGAAGTGTGATCATTGTGGTGAACTTCATGGCAG   |      |      |      |      |      |      |      |      |      |
|                                      |        | Section 14                                                                                         |      |      |      |      |      |      |      |      |      |
| HIV-1 HXB2<br>SARS-CoV-2 NC_045512.2 | (1262) | 1262                                                                                               | 1270 | 1280 | 1290 | 1300 | 1310 | 1320 | 1330 | 1340 | 1358 |
|                                      | (1)    | -----                                                                                              |      |      |      |      |      |      |      |      |      |
|                                      | (1262) | ACGGGCGATTTTGTAAAGCCACTTGCGAATTTTGTGGCACTGAGAATTTGACTAAAGAAGGTGCCACTACTTGTGGTTACTTACCCCAAATGCTG    |      |      |      |      |      |      |      |      |      |

SARS-CoV-2 & HIV-1.apr

|                        |        |            |                                                                                                   |      |      |      |      |      |      |      |      |      |      |
|------------------------|--------|------------|---------------------------------------------------------------------------------------------------|------|------|------|------|------|------|------|------|------|------|
|                        |        | Section 15 |                                                                                                   |      |      |      |      |      |      |      |      |      |      |
|                        |        | (1359)     | 1359                                                                                              | 1370 | 1380 | 1390 | 1400 | 1410 | 1420 | 1430 | 1440 | 1455 |      |
| HIV-1 HXB2             | (1)    |            | -----                                                                                             |      |      |      |      |      |      |      |      |      |      |
| SARS-CoV-2 NC_045512.2 | (1359) |            | TTGTTAAAATTTATTGTCCAGCATGTCACAATTCAGAAGTAGGACCTGAGCATAGTCTTGCCGAATACCATAATGAATCTGGCTTGAAAACCATTCT |      |      |      |      |      |      |      |      |      |      |
|                        |        | Section 16 |                                                                                                   |      |      |      |      |      |      |      |      |      |      |
|                        |        | (1456)     | 1456                                                                                              | 1470 | 1480 | 1490 | 1500 | 1510 | 1520 | 1530 | 1540 | 1552 |      |
| HIV-1 HXB2             | (1)    |            | -----                                                                                             |      |      |      |      |      |      |      |      |      |      |
| SARS-CoV-2 NC_045512.2 | (1456) |            | TCGTAAGGGTGGTCGCACTATTGCCTTTGGAGGCTGTGTGTTCTCTTATGTTGGTTGCCATAACAAGTGTGCCTATTGGGTTCCACGTGCTAGCGCT |      |      |      |      |      |      |      |      |      |      |
|                        |        | Section 17 |                                                                                                   |      |      |      |      |      |      |      |      |      |      |
|                        |        | (1553)     | 1553                                                                                              | 1560 | 1570 | 1580 | 1590 | 1600 | 1610 | 1620 | 1630 | 1649 |      |
| HIV-1 HXB2             | (1)    |            | -----                                                                                             |      |      |      |      |      |      |      |      |      |      |
| SARS-CoV-2 NC_045512.2 | (1553) |            | AACATAGGTTGTAACCATACAGGTGTTGTTGGAGAAGGTTCCGAAGGTCTTAATGACAACCTTCTTGAAATACTCCAAAAAGAGAAAGTCAACATCA |      |      |      |      |      |      |      |      |      |      |
|                        |        | Section 18 |                                                                                                   |      |      |      |      |      |      |      |      |      |      |
|                        |        | (1650)     | 1650                                                                                              | 1660 | 1670 | 1680 | 1690 | 1700 | 1710 | 1720 | 1730 | 1746 |      |
| HIV-1 HXB2             | (1)    |            | -----                                                                                             |      |      |      |      |      |      |      |      |      |      |
| SARS-CoV-2 NC_045512.2 | (1650) |            | ATATTGTTGGTGACTTTAAACTTAATGAAGAGATCGCCATTATTTTGGCATCTTTTTCTGCTTCCACAAGTGCTTTTGTGGAAACTGTGAAAGGTTT |      |      |      |      |      |      |      |      |      |      |
|                        |        | Section 19 |                                                                                                   |      |      |      |      |      |      |      |      |      |      |
|                        |        | (1747)     | 1747                                                                                              | 1760 | 1770 | 1780 | 1790 | 1800 | 1810 | 1820 | 1830 | 1843 |      |
| HIV-1 HXB2             | (1)    |            | -----                                                                                             |      |      |      |      |      |      |      |      |      |      |
| SARS-CoV-2 NC_045512.2 | (1747) |            | GGATTATAAAGCATTCAAACAAATTGTTGAATCCTGTGGTAATTTTAAAGTTACAAAAGGAAAAGCTAAAAAAGGTGCCTGGAATATTGGTGAACAG |      |      |      |      |      |      |      |      |      |      |
|                        |        | Section 20 |                                                                                                   |      |      |      |      |      |      |      |      |      |      |
|                        |        | (1844)     | 1844                                                                                              | 1850 | 1860 | 1870 | 1880 | 1890 | 1900 | 1910 | 1920 | 1930 | 1940 |
| HIV-1 HXB2             | (1)    |            | -----                                                                                             |      |      |      |      |      |      |      |      |      |      |
| SARS-CoV-2 NC_045512.2 | (1844) |            | AAATCAATACTGAGTCCTCTTTATGCATTTGCATCAGAGGCTGCTCGTGTTGTACGATCAATTTTCTCCCGCACTCTTGAAACTGCTCAAATTTCTG |      |      |      |      |      |      |      |      |      |      |
|                        |        | Section 21 |                                                                                                   |      |      |      |      |      |      |      |      |      |      |
|                        |        | (1941)     | 1941                                                                                              | 1950 | 1960 | 1970 | 1980 | 1990 | 2000 | 2010 | 2020 | 2037 |      |
| HIV-1 HXB2             | (1)    |            | -----                                                                                             |      |      |      |      |      |      |      |      |      |      |
| SARS-CoV-2 NC_045512.2 | (1941) |            | TGCGTGTTTTACAGAAGGCCGCTATAACAATACTAGATGGAATTTACAGTATTCACTGAGACTCATTGATGCTATGATGTTACATCTGATTTGGC   |      |      |      |      |      |      |      |      |      |      |

## SARS-CoV-2 &amp; HIV-1.apr

|                                      |        |                                                                                                    |      |      |      |      |      |      |      |      |            |      |
|--------------------------------------|--------|----------------------------------------------------------------------------------------------------|------|------|------|------|------|------|------|------|------------|------|
|                                      |        |                                                                                                    |      |      |      |      |      |      |      |      | Section 22 |      |
| HIV-1 HXB2<br>SARS-CoV-2 NC_045512.2 | (2038) | 2038                                                                                               | 2050 | 2060 | 2070 | 2080 | 2090 | 2100 | 2110 | 2120 | 2134       |      |
|                                      | (1)    | -----                                                                                              |      |      |      |      |      |      |      |      |            |      |
|                                      | (2038) | TACTAACAATCTAGTTGTAATGGCCTACATTACAGGTGGTGTGTTTCAGTTGACTTCGCAGTGGCTAACTAACATCTTTGGCACTGTTTATGAAAAA  |      |      |      |      |      |      |      |      |            |      |
|                                      |        |                                                                                                    |      |      |      |      |      |      |      |      | Section 23 |      |
| HIV-1 HXB2<br>SARS-CoV-2 NC_045512.2 | (2135) | 2135                                                                                               | 2140 | 2150 | 2160 | 2170 | 2180 | 2190 | 2200 | 2210 | 2220       | 2231 |
|                                      | (1)    | -----                                                                                              |      |      |      |      |      |      |      |      |            |      |
|                                      | (2135) | CTCAAACCCGTCCTTGATTGGCTTGAAGAGAAGTTTAAGGAAGGTGTAGAGTTTCTTAGAGACGGTTGGGAAATTGTTAAATTTATCTCAACCTGTG  |      |      |      |      |      |      |      |      |            |      |
|                                      |        |                                                                                                    |      |      |      |      |      |      |      |      | Section 24 |      |
| HIV-1 HXB2<br>SARS-CoV-2 NC_045512.2 | (2232) | 2232                                                                                               | 2240 | 2250 | 2260 | 2270 | 2280 | 2290 | 2300 | 2310 | 2328       |      |
|                                      | (1)    | -----                                                                                              |      |      |      |      |      |      |      |      |            |      |
|                                      | (2232) | CTTGTAATTTGTCGGTGGACAAATTGTACCTGTGCAAAGGAAATTAAGGAGAGTGTTTCAGACATTCTTTAAGCTTGTAATAAATTTTTGGCTTT    |      |      |      |      |      |      |      |      |            |      |
|                                      |        |                                                                                                    |      |      |      |      |      |      |      |      | Section 25 |      |
| HIV-1 HXB2<br>SARS-CoV-2 NC_045512.2 | (2329) | 2329                                                                                               | 2340 | 2350 | 2360 | 2370 | 2380 | 2390 | 2400 | 2410 | 2425       |      |
|                                      | (1)    | -----                                                                                              |      |      |      |      |      |      |      |      |            |      |
|                                      | (2329) | GTGTGCTGACTCTATCATTATTGGTGGAGCTAAACTTAAAGCCTTGAATTTAGGTGAAACATTTGTCACGCACTCAAAGGGATTGTACAGAAAGTGT  |      |      |      |      |      |      |      |      |            |      |
|                                      |        |                                                                                                    |      |      |      |      |      |      |      |      | Section 26 |      |
| HIV-1 HXB2<br>SARS-CoV-2 NC_045512.2 | (2426) | 2426                                                                                               | 2440 | 2450 | 2460 | 2470 | 2480 | 2490 | 2500 | 2510 | 2522       |      |
|                                      | (1)    | -----                                                                                              |      |      |      |      |      |      |      |      |            |      |
|                                      | (2426) | GTTAAATCCAGAGAAGAACTGGCCTACTCATGCCTCTAAAAGCCCCAAAAGAAATTATCTTCTTAGAGGGAGAAACACTTCCCACAGAAGTGTTAA   |      |      |      |      |      |      |      |      |            |      |
|                                      |        |                                                                                                    |      |      |      |      |      |      |      |      | Section 27 |      |
| HIV-1 HXB2<br>SARS-CoV-2 NC_045512.2 | (2523) | 2523                                                                                               | 2530 | 2540 | 2550 | 2560 | 2570 | 2580 | 2590 | 2600 | 2619       |      |
|                                      | (1)    | -----                                                                                              |      |      |      |      |      |      |      |      |            |      |
|                                      | (2523) | CAGAGGAAGTTGTCTTGAAAACCTGGTGATTTACAACCATTAGAACAACCTACTAGTGAAGCTGTTGAAGCTCCATTGGTTGGTACACCAGTTTGTAT |      |      |      |      |      |      |      |      |            |      |
|                                      |        |                                                                                                    |      |      |      |      |      |      |      |      | Section 28 |      |
| HIV-1 HXB2<br>SARS-CoV-2 NC_045512.2 | (2620) | 2620                                                                                               | 2630 | 2640 | 2650 | 2660 | 2670 | 2680 | 2690 | 2700 | 2716       |      |
|                                      | (1)    | -----                                                                                              |      |      |      |      |      |      |      |      |            |      |
|                                      | (2620) | TAACGGGCTTATGTTGCTCGAAATCAAAGACACAGAAAAGTACTGTGCCCTTGACCTAATATGATGGTAACAAACAATACCTTCACACTCAAAGGC   |      |      |      |      |      |      |      |      |            |      |

## SARS-CoV-2 &amp; HIV-1.apr

|                                      |        |                                                                                                     |      |      |      |      |      |      |      |      |            |
|--------------------------------------|--------|-----------------------------------------------------------------------------------------------------|------|------|------|------|------|------|------|------|------------|
|                                      |        |                                                                                                     |      |      |      |      |      |      |      |      | Section 29 |
| HIV-1 HXB2<br>SARS-CoV-2 NC_045512.2 | (2717) | 2717                                                                                                | 2730 | 2740 | 2750 | 2760 | 2770 | 2780 | 2790 | 2800 | 2813       |
|                                      | (1)    | -----                                                                                               |      |      |      |      |      |      |      |      |            |
|                                      | (2717) | GGTGCACCAACAAAGGTTACTTTTGGTGATGACACTGTGATAGAAGTGCAAGGTTACAAGAGTGTGAATATCACTTTTGAACCTTGATGAAAGGATTG  |      |      |      |      |      |      |      |      |            |
|                                      |        |                                                                                                     |      |      |      |      |      |      |      |      | Section 30 |
| HIV-1 HXB2<br>SARS-CoV-2 NC_045512.2 | (2814) | 2814                                                                                                | 2820 | 2830 | 2840 | 2850 | 2860 | 2870 | 2880 | 2890 | 2910       |
|                                      | (1)    | -----                                                                                               |      |      |      |      |      |      |      |      |            |
|                                      | (2814) | ATAAAGTACTTAATGAGAAGTGCTCTGCCTATACAGTTGAACTCGGTACAGAAGTAAATGAGTTCGCCTGTGTTGTGGCAGATGCTGTCATAAAAAAC  |      |      |      |      |      |      |      |      |            |
|                                      |        |                                                                                                     |      |      |      |      |      |      |      |      | Section 31 |
| HIV-1 HXB2<br>SARS-CoV-2 NC_045512.2 | (2911) | 2911                                                                                                | 2920 | 2930 | 2940 | 2950 | 2960 | 2970 | 2980 | 2990 | 3007       |
|                                      | (1)    | -----                                                                                               |      |      |      |      |      |      |      |      |            |
|                                      | (2911) | TTTGCAACCAGTATCTGAATTACTTACACCACTGGGCATTGATTTAGATGAGTGGAGTATGGCTACATACTACTTATTTGATGAGTCTGGTGAGTTT   |      |      |      |      |      |      |      |      |            |
|                                      |        |                                                                                                     |      |      |      |      |      |      |      |      | Section 32 |
| HIV-1 HXB2<br>SARS-CoV-2 NC_045512.2 | (3008) | 3008                                                                                                | 3020 | 3030 | 3040 | 3050 | 3060 | 3070 | 3080 | 3090 | 3104       |
|                                      | (1)    | -----                                                                                               |      |      |      |      |      |      |      |      |            |
|                                      | (3008) | AAATTGGCTTCACATATGTATTGTTCTTTCTACCCTCCAGATGAGGATGAAGAAGAAGGTGATTGTGAAGAAGAAGAGTTTGAGCCATCAACTCAAT   |      |      |      |      |      |      |      |      |            |
|                                      |        |                                                                                                     |      |      |      |      |      |      |      |      | Section 33 |
| HIV-1 HXB2<br>SARS-CoV-2 NC_045512.2 | (3105) | 3105                                                                                                | 3110 | 3120 | 3130 | 3140 | 3150 | 3160 | 3170 | 3180 | 3201       |
|                                      | (1)    | -----                                                                                               |      |      |      |      |      |      |      |      |            |
|                                      | (3105) | ATGAGTATGGTACTGAAGATGATTACCAAGGTAAACCTTTGGAATTTGGTGCCACTTCTGCTGCTCTTCAACCTGAAGAAGAGCAAGAAGAAGATTG   |      |      |      |      |      |      |      |      |            |
|                                      |        |                                                                                                     |      |      |      |      |      |      |      |      | Section 34 |
| HIV-1 HXB2<br>SARS-CoV-2 NC_045512.2 | (3202) | 3202                                                                                                | 3210 | 3220 | 3230 | 3240 | 3250 | 3260 | 3270 | 3280 | 3298       |
|                                      | (1)    | -----                                                                                               |      |      |      |      |      |      |      |      |            |
|                                      | (3202) | GTTAGATGATGATAGTCAACAACTGTTGGTCAACAAGACGGCAGTGAGGACAATCAGACAACCTACTATTCAAACAATTGTTGAGGTTCAACCTCAA   |      |      |      |      |      |      |      |      |            |
|                                      |        |                                                                                                     |      |      |      |      |      |      |      |      | Section 35 |
| HIV-1 HXB2<br>SARS-CoV-2 NC_045512.2 | (3299) | 3299                                                                                                | 3310 | 3320 | 3330 | 3340 | 3350 | 3360 | 3370 | 3380 | 3395       |
|                                      | (1)    | -----                                                                                               |      |      |      |      |      |      |      |      |            |
|                                      | (3299) | TTAGAGATGGAACCTTACACCAGTTGTTTCAGACTATTGAAGTGAATAGTTTTAGTGGTTATTTAAACCTTACTGACAATGTATACATTAAAAATGCAG |      |      |      |      |      |      |      |      |            |

SARS-CoV-2 & HIV-1.apr

|                                      |        |                                                                                                    |      |      |      |      |      |      |      |      |            |
|--------------------------------------|--------|----------------------------------------------------------------------------------------------------|------|------|------|------|------|------|------|------|------------|
|                                      |        |                                                                                                    |      |      |      |      |      |      |      |      | Section 36 |
| HIV-1 HXB2<br>SARS-CoV-2 NC_045512.2 | (3396) | 3396                                                                                               | 3410 | 3420 | 3430 | 3440 | 3450 | 3460 | 3470 | 3480 | 3492       |
|                                      | (1)    | -----                                                                                              |      |      |      |      |      |      |      |      |            |
|                                      | (3396) | ACATTGTGGAAGAAGCTAAAAAGGTAAAACCAACAGTGGTTGTTAATGCAGCCAATGTTTACCTTAAACATGGAGGAGGTGTTGCAGGAGCCTTAAA  |      |      |      |      |      |      |      |      |            |
|                                      |        |                                                                                                    |      |      |      |      |      |      |      |      | Section 37 |
| HIV-1 HXB2<br>SARS-CoV-2 NC_045512.2 | (3493) | 3493                                                                                               | 3500 | 3510 | 3520 | 3530 | 3540 | 3550 | 3560 | 3570 | 3589       |
|                                      | (1)    | -----                                                                                              |      |      |      |      |      |      |      |      |            |
|                                      | (3493) | TAAGGCTACTAACAATGCCATGCAAGTTGAATCTGATGATTACATAGCTACTAATGGACCACTTAAAGTGGGTGGTAGTTGTGTTTTAAGCGGACAC  |      |      |      |      |      |      |      |      |            |
|                                      |        |                                                                                                    |      |      |      |      |      |      |      |      | Section 38 |
| HIV-1 HXB2<br>SARS-CoV-2 NC_045512.2 | (3590) | 3590                                                                                               | 3600 | 3610 | 3620 | 3630 | 3640 | 3650 | 3660 | 3670 | 3686       |
|                                      | (1)    | -----                                                                                              |      |      |      |      |      |      |      |      |            |
|                                      | (3590) | AATCTTGCTAAACACTGTCTTCATGTTGTCGGCCCAAATGTTAACAAAGGTGAAGACATTCAACTTCTTAAGAGTGCTTATGAAAATTTTAATCAGC  |      |      |      |      |      |      |      |      |            |
|                                      |        |                                                                                                    |      |      |      |      |      |      |      |      | Section 39 |
| HIV-1 HXB2<br>SARS-CoV-2 NC_045512.2 | (3687) | 3687                                                                                               | 3700 | 3710 | 3720 | 3730 | 3740 | 3750 | 3760 | 3770 | 3783       |
|                                      | (1)    | -----                                                                                              |      |      |      |      |      |      |      |      |            |
|                                      | (3687) | ACGAAGTTCTACTTGCACCATTATTATCAGCTGGTATTTTTGGTGCTGACCCTATACATTCTTTAAGAGTTTGTGTAGATACTGTTTCGCACAAATGT |      |      |      |      |      |      |      |      |            |
|                                      |        |                                                                                                    |      |      |      |      |      |      |      |      | Section 40 |
| HIV-1 HXB2<br>SARS-CoV-2 NC_045512.2 | (3784) | 3784                                                                                               | 3790 | 3800 | 3810 | 3820 | 3830 | 3840 | 3850 | 3860 | 3880       |
|                                      | (1)    | -----                                                                                              |      |      |      |      |      |      |      |      |            |
|                                      | (3784) | CTACTTAGCTGTCTTTGATAAAAAATCTCTATGACAAACTTGTTTCAAGCTTTTTGGAAATGAAGAGTGAAAAGCAAGTTGAACAAAAGATCGCTGAG |      |      |      |      |      |      |      |      |            |
|                                      |        |                                                                                                    |      |      |      |      |      |      |      |      | Section 41 |
| HIV-1 HXB2<br>SARS-CoV-2 NC_045512.2 | (3881) | 3881                                                                                               | 3890 | 3900 | 3910 | 3920 | 3930 | 3940 | 3950 | 3960 | 3977       |
|                                      | (1)    | -----                                                                                              |      |      |      |      |      |      |      |      |            |
|                                      | (3881) | ATTCTTAAAGAGGAAGTTAAGCCATTTATAACTGAAAGTAAACCTTCAGTTGAACAGAGAAAACAAGATGATAAGAAAATCAAAGCTTGTGTTGAAG  |      |      |      |      |      |      |      |      |            |
|                                      |        |                                                                                                    |      |      |      |      |      |      |      |      | Section 42 |
| HIV-1 HXB2<br>SARS-CoV-2 NC_045512.2 | (3978) | 3978                                                                                               | 3990 | 4000 | 4010 | 4020 | 4030 | 4040 | 4050 | 4060 | 4074       |
|                                      | (1)    | -----                                                                                              |      |      |      |      |      |      |      |      |            |
|                                      | (3978) | AAGTTACAACAACCTCTGGAAGAACTAAGTTCCTCACAGAAAACCTTGTTACTTTATATTGACATTAATGGCAATCTTCATCCAGATTCTGCCACTCT |      |      |      |      |      |      |      |      |            |

## SARS-CoV-2 &amp; HIV-1.apr

|                        |        |                                                                                                     |      |      |      |      |      |      |      |      |      |      |
|------------------------|--------|-----------------------------------------------------------------------------------------------------|------|------|------|------|------|------|------|------|------|------|
| Section 43             |        |                                                                                                     |      |      |      |      |      |      |      |      |      |      |
| HIV-1 HXB2             | (4075) | 4075                                                                                                | 4080 | 4090 | 4100 | 4110 | 4120 | 4130 | 4140 | 4150 | 4160 | 4171 |
| SARS-CoV-2 NC_045512.2 | (1)    | -----                                                                                               |      |      |      |      |      |      |      |      |      |      |
|                        | (4075) | TGTTAGTGACATTGACATCACTTTCTTAAAGAAAGATGCTCCATATATAGTGGGTGATGTTGTTCAAGAGGGTGTTTTAACTGCTGTGGTTATACCT   |      |      |      |      |      |      |      |      |      |      |
| Section 44             |        |                                                                                                     |      |      |      |      |      |      |      |      |      |      |
| HIV-1 HXB2             | (4172) | 4172                                                                                                | 4180 | 4190 | 4200 | 4210 | 4220 | 4230 | 4240 | 4250 |      | 4268 |
| SARS-CoV-2 NC_045512.2 | (1)    | -----                                                                                               |      |      |      |      |      |      |      |      |      |      |
|                        | (4172) | ACTAAAAAGGCTGGTGGCACTACTGAAATGCTAGCGAAAGCTTTGAGAAAAGTGCCAACAGACAATTATATAACCACTTACCCGGGTGAGGGTTTAA   |      |      |      |      |      |      |      |      |      |      |
| Section 45             |        |                                                                                                     |      |      |      |      |      |      |      |      |      |      |
| HIV-1 HXB2             | (4269) | 4269                                                                                                | 4280 | 4290 | 4300 | 4310 | 4320 | 4330 | 4340 | 4350 |      | 4365 |
| SARS-CoV-2 NC_045512.2 | (1)    | -----                                                                                               |      |      |      |      |      |      |      |      |      |      |
|                        | (4269) | ATGGTTACACTGTAGAGGAGGCAAAGACAGTGCTTAAAAAGTGTAAGAGTGCCCTTTTACATTCTACCATCTATTATCTCTAATGAGAAGCAAGAAAT  |      |      |      |      |      |      |      |      |      |      |
| Section 46             |        |                                                                                                     |      |      |      |      |      |      |      |      |      |      |
| HIV-1 HXB2             | (4366) | 4366                                                                                                | 4380 | 4390 | 4400 | 4410 | 4420 | 4430 | 4440 | 4450 |      | 4462 |
| SARS-CoV-2 NC_045512.2 | (1)    | -----                                                                                               |      |      |      |      |      |      |      |      |      |      |
|                        | (4366) | TCTTGGAAGCTGTTTCTTGGAATTTGCGAGAAATGCTTGACATGCAGAAAGAAACACGCAAATTAATGCCTGTCTGTGTGGAAGCTAAAGCCATAGTT  |      |      |      |      |      |      |      |      |      |      |
| Section 47             |        |                                                                                                     |      |      |      |      |      |      |      |      |      |      |
| HIV-1 HXB2             | (4463) | 4463                                                                                                | 4470 | 4480 | 4490 | 4500 | 4510 | 4520 | 4530 | 4540 |      | 4559 |
| SARS-CoV-2 NC_045512.2 | (1)    | -----                                                                                               |      |      |      |      |      |      |      |      |      |      |
|                        | (4463) | TCAACTATACAGCGTAAATATAAGGGTATTAAAAATACAAGAGGGTGTTGGTTGATTATGGTGCTAGATTTTACTTTTACACCAGTAAACAAGCTGTAG |      |      |      |      |      |      |      |      |      |      |
| Section 48             |        |                                                                                                     |      |      |      |      |      |      |      |      |      |      |
| HIV-1 HXB2             | (4560) | 4560                                                                                                | 4570 | 4580 | 4590 | 4600 | 4610 | 4620 | 4630 | 4640 |      | 4656 |
| SARS-CoV-2 NC_045512.2 | (1)    | -----                                                                                               |      |      |      |      |      |      |      |      |      |      |
|                        | (4560) | CGTCACTTATCAACACACTTAACGATCTAAATGAAACTCTTGTTACAATGCCACTTGGCTATGTAACACATGGCTTAAATTTGGAAGAAGCTGCTCG   |      |      |      |      |      |      |      |      |      |      |
| Section 49             |        |                                                                                                     |      |      |      |      |      |      |      |      |      |      |
| HIV-1 HXB2             | (4657) | 4657                                                                                                | 4670 | 4680 | 4690 | 4700 | 4710 | 4720 | 4730 | 4740 |      | 4753 |
| SARS-CoV-2 NC_045512.2 | (1)    | -----                                                                                               |      |      |      |      |      |      |      |      |      |      |
|                        | (4657) | GTATATGAGATCTCTCAAAGTGCCAGCTACAGTTTCTGTTTCTTCACCTGATGCTGTTACAGCGTATAATGGTTATCTTACTTCTTCTTCTAAACA    |      |      |      |      |      |      |      |      |      |      |

## SARS-CoV-2 &amp; HIV-1.apr

|                        |        |                                                                                                     |      |      |      |      |      |      |      |      |      |      |
|------------------------|--------|-----------------------------------------------------------------------------------------------------|------|------|------|------|------|------|------|------|------|------|
| Section 50             |        |                                                                                                     |      |      |      |      |      |      |      |      |      |      |
| HIV-1 HXB2             | (4754) | 4754                                                                                                | 4760 | 4770 | 4780 | 4790 | 4800 | 4810 | 4820 | 4830 | 4840 | 4850 |
| SARS-CoV-2 NC_045512.2 | (1)    | CCTGAAGAACATTTTATTGAAACCATCTCACTTGCTGGTTCCTATAAAGATTGGTCCTATTCTGGACAATCTACACAACCTAGGTATAGAATTTCTTTA |      |      |      |      |      |      |      |      |      |      |
| Section 51             |        |                                                                                                     |      |      |      |      |      |      |      |      |      |      |
| HIV-1 HXB2             | (4851) | 4851                                                                                                | 4860 | 4870 | 4880 | 4890 | 4900 | 4910 | 4920 | 4930 |      | 4947 |
| SARS-CoV-2 NC_045512.2 | (1)    | AGAGAGGTGATAAAAGTGATATTACACTAGTAATCCTACCACATTCCACCTAGATGGTGAAGTTATCACCTTTGACAATCTTAAGACACTTCTTTTC   |      |      |      |      |      |      |      |      |      |      |
| Section 52             |        |                                                                                                     |      |      |      |      |      |      |      |      |      |      |
| HIV-1 HXB2             | (4948) | 4948                                                                                                | 4960 | 4970 | 4980 | 4990 | 5000 | 5010 | 5020 | 5030 |      | 5044 |
| SARS-CoV-2 NC_045512.2 | (1)    | TTTGAGAGAAGTGAGGACTATTAAGGTGTTTACAACAGTAGACAACATTAACCTCCACACGCAAGTTGTGGACATGTCAATGACATATGGACAACAG   |      |      |      |      |      |      |      |      |      |      |
| Section 53             |        |                                                                                                     |      |      |      |      |      |      |      |      |      |      |
| HIV-1 HXB2             | (5045) | 5045                                                                                                | 5050 | 5060 | 5070 | 5080 | 5090 | 5100 | 5110 | 5120 | 5130 | 5141 |
| SARS-CoV-2 NC_045512.2 | (1)    | TTTGGTCCAACCTTATTTGGATGGAGCTGATGTTACTAAAAATAAAACCTCATAATTCACATGAAGGTAAAACATTTTATGTTTTACCTAATGATGACA |      |      |      |      |      |      |      |      |      |      |
| Section 54             |        |                                                                                                     |      |      |      |      |      |      |      |      |      |      |
| HIV-1 HXB2             | (5142) | 5142                                                                                                | 5150 | 5160 | 5170 | 5180 | 5190 | 5200 | 5210 | 5220 |      | 5238 |
| SARS-CoV-2 NC_045512.2 | (1)    | CTCTACGTGTTGAGGCTTTTGAGTACTACCACACAACCTGATCCTAGTTTTCTGGGTAGGTACATGTCAGCATTAAATCACACTAAAAAGTGGAATA   |      |      |      |      |      |      |      |      |      |      |
| Section 55             |        |                                                                                                     |      |      |      |      |      |      |      |      |      |      |
| HIV-1 HXB2             | (5239) | 5239                                                                                                | 5250 | 5260 | 5270 | 5280 | 5290 | 5300 | 5310 | 5320 |      | 5335 |
| SARS-CoV-2 NC_045512.2 | (1)    | CCCACAAGTTAATGGTTTAACTTCTATTAAATGGGCAGATAACAACCTGTTATCTTGCCACTGCATTGTTAACACTCCAACAAATAGAGTTGAAGTTT  |      |      |      |      |      |      |      |      |      |      |
| Section 56             |        |                                                                                                     |      |      |      |      |      |      |      |      |      |      |
| HIV-1 HXB2             | (5336) | 5336                                                                                                | 5350 | 5360 | 5370 | 5380 | 5390 | 5400 | 5410 | 5420 |      | 5432 |
| SARS-CoV-2 NC_045512.2 | (1)    | AATCCACCTGCTCTACAAGATGCTTATTACAGAGCAAGGGCTGGTGAAGCTGCTAACTTTTGTGCACTTATCTTAGCCTACTGTAATAAGACAGTAG   |      |      |      |      |      |      |      |      |      |      |



## SARS-CoV-2 &amp; HIV-1.apr

|                        |  |        |                                                                                                    |      |      |      |      |      |      |      |      |            |      |
|------------------------|--|--------|----------------------------------------------------------------------------------------------------|------|------|------|------|------|------|------|------|------------|------|
|                        |  |        |                                                                                                    |      |      |      |      |      |      |      |      | Section 57 |      |
|                        |  | (5433) | 5433                                                                                               | 5440 | 5450 | 5460 | 5470 | 5480 | 5490 | 5500 | 5510 | 5529       |      |
| HIV-1 HXB2             |  | (1)    | -----                                                                                              |      |      |      |      |      |      |      |      |            |      |
| SARS-CoV-2 NC_045512.2 |  | (5433) | GTGAGTTAGGTGATGTTAGAGAAACAATGAGTTACTTGTTTCAACATGCCAATTTAGATTCTTGCAAAAGAGTCTTGAACGTGGTGTGTAAACTTG   |      |      |      |      |      |      |      |      |            |      |
|                        |  |        |                                                                                                    |      |      |      |      |      |      |      |      | Section 58 |      |
|                        |  | (5530) | 5530                                                                                               | 5540 | 5550 | 5560 | 5570 | 5580 | 5590 | 5600 | 5610 | 5626       |      |
| HIV-1 HXB2             |  | (1)    | -----                                                                                              |      |      |      |      |      |      |      |      |            |      |
| SARS-CoV-2 NC_045512.2 |  | (5530) | TGGACAACAGCAGACAACCCTTAAGGGTGTAGAAGCTGTTATGTACATGGGCACACTTTCTTATGAACAATTTAAGAAAGGTGTTTCAGATACCTTGT |      |      |      |      |      |      |      |      |            |      |
|                        |  |        |                                                                                                    |      |      |      |      |      |      |      |      | Section 59 |      |
|                        |  | (5627) | 5627                                                                                               | 5640 | 5650 | 5660 | 5670 | 5680 | 5690 | 5700 | 5710 | 5723       |      |
| HIV-1 HXB2             |  | (1)    | -----                                                                                              |      |      |      |      |      |      |      |      |            |      |
| SARS-CoV-2 NC_045512.2 |  | (5627) | ACGTGTGGTAAACAAGCTACAAAATATCTAGTACAACAGGAGTCACCTTTTGTATGATGTCAGCACCACCTGCTCAGTATGAACTTAAGCATGGTA   |      |      |      |      |      |      |      |      |            |      |
|                        |  |        |                                                                                                    |      |      |      |      |      |      |      |      | Section 60 |      |
|                        |  | (5724) | 5724                                                                                               | 5730 | 5740 | 5750 | 5760 | 5770 | 5780 | 5790 | 5800 | 5810       | 5820 |
| HIV-1 HXB2             |  | (1)    | -----                                                                                              |      |      |      |      |      |      |      |      |            |      |
| SARS-CoV-2 NC_045512.2 |  | (5724) | CATTTACTTGTGCTAGTGAGTACACTGGTAATTACCAGTGTGGTCACTATAAACATATAACTTCTAAAGAACTTTGTATTGCATAGACGGTGCTTT   |      |      |      |      |      |      |      |      |            |      |
|                        |  |        |                                                                                                    |      |      |      |      |      |      |      |      | Section 61 |      |
|                        |  | (5821) | 5821                                                                                               | 5830 | 5840 | 5850 | 5860 | 5870 | 5880 | 5890 | 5900 | 5917       |      |
| HIV-1 HXB2             |  | (1)    | -----                                                                                              |      |      |      |      |      |      |      |      |            |      |
| SARS-CoV-2 NC_045512.2 |  | (5821) | ACTTACAAAGTCCTCAGAATACAAAGGTCCTATTACGGATGTTTTCTACAAAGAAAACAGTTACACAACAACCATAAAACCAGTTACTTATAAATTG  |      |      |      |      |      |      |      |      |            |      |
|                        |  |        |                                                                                                    |      |      |      |      |      |      |      |      | Section 62 |      |
|                        |  | (5918) | 5918                                                                                               | 5930 | 5940 | 5950 | 5960 | 5970 | 5980 | 5990 | 6000 | 6014       |      |
| HIV-1 HXB2             |  | (1)    | -----                                                                                              |      |      |      |      |      |      |      |      |            |      |
| SARS-CoV-2 NC_045512.2 |  | (5918) | GATGGTGTTGTTTGTACAGAAATTGACCCTAAGTTGGACAATTATTATAAGAAAGACAATTCTTATTTTCACAGAGCAACCAATTGATCTTGTACCAA |      |      |      |      |      |      |      |      |            |      |
|                        |  |        |                                                                                                    |      |      |      |      |      |      |      |      | Section 63 |      |
|                        |  | (6015) | 6015                                                                                               | 6020 | 6030 | 6040 | 6050 | 6060 | 6070 | 6080 | 6090 | 6100       | 6111 |
| HIV-1 HXB2             |  | (1)    | -----                                                                                              |      |      |      |      |      |      |      |      |            |      |
| SARS-CoV-2 NC_045512.2 |  | (6015) | ACCAACCATATCCAAACGCAAGCTTCGATAATTTTAAGTTTGTATGTGATAATATCAAATTTGCTGATGATTTAAACCAGTTAACTGGTTATAAGAA  |      |      |      |      |      |      |      |      |            |      |

## SARS-CoV-2 &amp; HIV-1.apr

|                        |        |                                                                                                     |      |      |      |      |      |      |      |      |      |
|------------------------|--------|-----------------------------------------------------------------------------------------------------|------|------|------|------|------|------|------|------|------|
| Section 64             |        |                                                                                                     |      |      |      |      |      |      |      |      |      |
|                        | (6112) | 6112                                                                                                | 6120 | 6130 | 6140 | 6150 | 6160 | 6170 | 6180 | 6190 | 6208 |
| HIV-1 HXB2             | (1)    | -----                                                                                               |      |      |      |      |      |      |      |      |      |
| SARS-CoV-2 NC_045512.2 | (6112) | ACCTGCTTCAAGAGAGCTTAAAGTTACATTTTTCCCTGACTTAAATGGTGATGTGGTGGCTATTGATTATAAACACTACACACCCTCTTTTAAGAAA   |      |      |      |      |      |      |      |      |      |
| Section 65             |        |                                                                                                     |      |      |      |      |      |      |      |      |      |
|                        | (6209) | 6209                                                                                                | 6220 | 6230 | 6240 | 6250 | 6260 | 6270 | 6280 | 6290 | 6305 |
| HIV-1 HXB2             | (1)    | -----                                                                                               |      |      |      |      |      |      |      |      |      |
| SARS-CoV-2 NC_045512.2 | (6209) | GGAGCTAAATTGTTACATAAACCTATTGTTTGGCATGTTAACAATGCAACTAATAAAGCCACGTATAAACCAAATACCTGGTGTATACGTTGTCTTT   |      |      |      |      |      |      |      |      |      |
| Section 66             |        |                                                                                                     |      |      |      |      |      |      |      |      |      |
|                        | (6306) | 6306                                                                                                | 6320 | 6330 | 6340 | 6350 | 6360 | 6370 | 6380 | 6390 | 6402 |
| HIV-1 HXB2             | (1)    | -----                                                                                               |      |      |      |      |      |      |      |      |      |
| SARS-CoV-2 NC_045512.2 | (6306) | GGAGCACAAAACCAGTTGAAACATCAAATTCGTTTGATGTACTGAAGTCAGAGGACGCGCAGGGAATGGATAATCTTGCCTGCGAAGATCTAAAACC   |      |      |      |      |      |      |      |      |      |
| Section 67             |        |                                                                                                     |      |      |      |      |      |      |      |      |      |
|                        | (6403) | 6403                                                                                                | 6410 | 6420 | 6430 | 6440 | 6450 | 6460 | 6470 | 6480 | 6499 |
| HIV-1 HXB2             | (1)    | -----                                                                                               |      |      |      |      |      |      |      |      |      |
| SARS-CoV-2 NC_045512.2 | (6403) | AGTCTCTGAAGAAGTAGTGGAAAATCCTACCATACAGAAAGACGTTCTTGAGTGTAATGTGAAAACCTACCGAAGTTGTAGGAGACATTATACTTAAA  |      |      |      |      |      |      |      |      |      |
| Section 68             |        |                                                                                                     |      |      |      |      |      |      |      |      |      |
|                        | (6500) | 6500                                                                                                | 6510 | 6520 | 6530 | 6540 | 6550 | 6560 | 6570 | 6580 | 6596 |
| HIV-1 HXB2             | (1)    | -----                                                                                               |      |      |      |      |      |      |      |      |      |
| SARS-CoV-2 NC_045512.2 | (6500) | CCAGCAAATAATAGTTTAAAAATTACAGAAGAGGTTGGCCACACAGATCTAATGGCTGCTTATGTAGACAATTCTAGTCTTACTATTAAGAAACCTA   |      |      |      |      |      |      |      |      |      |
| Section 69             |        |                                                                                                     |      |      |      |      |      |      |      |      |      |
|                        | (6597) | 6597                                                                                                | 6610 | 6620 | 6630 | 6640 | 6650 | 6660 | 6670 | 6680 | 6693 |
| HIV-1 HXB2             | (1)    | -----                                                                                               |      |      |      |      |      |      |      |      |      |
| SARS-CoV-2 NC_045512.2 | (6597) | ATGAATTATCTAGAGTATTAGGTTTGAAAACCTTGCTACTCATGGTTTAGCTGCTGTTAATAGTGTCCTTGGGATACTATAGCTAATTATGCTAA     |      |      |      |      |      |      |      |      |      |
| Section 70             |        |                                                                                                     |      |      |      |      |      |      |      |      |      |
|                        | (6694) | 6694                                                                                                | 6700 | 6710 | 6720 | 6730 | 6740 | 6750 | 6760 | 6770 | 6790 |
| HIV-1 HXB2             | (1)    | -----                                                                                               |      |      |      |      |      |      |      |      |      |
| SARS-CoV-2 NC_045512.2 | (6694) | GCCTTTTCTTAACAAAGTTGTTAGTACAATACTACTAACATAGTTACACGGTGTTTAAACCGTGTTTGTACTAATTATATGCCTTATTTCTTTACTTTA |      |      |      |      |      |      |      |      |      |

SARS-CoV-2 & HIV-1.apr

|                                      |        |                                                                                                    |      |      |      |      |      |      |      |      |      |      |
|--------------------------------------|--------|----------------------------------------------------------------------------------------------------|------|------|------|------|------|------|------|------|------|------|
| Section 71                           |        |                                                                                                    |      |      |      |      |      |      |      |      |      |      |
| HIV-1 HXB2<br>SARS-CoV-2 NC_045512.2 | (6791) | 6791                                                                                               | 6800 | 6810 | 6820 | 6830 | 6840 | 6850 | 6860 | 6870 | 6887 |      |
|                                      | (1)    | -----                                                                                              |      |      |      |      |      |      |      |      |      |      |
| HIV-1 HXB2<br>SARS-CoV-2 NC_045512.2 | (6791) | TTGCTACAATTGTGTACTTTTACTAGAAAGTACAAATCTAGAAATTAAAGCATCTATGCCGACTACTATAGCAAAGAATACTGTTAAGAGTGTCGGTA |      |      |      |      |      |      |      |      |      |      |
|                                      | (6791) |                                                                                                    |      |      |      |      |      |      |      |      |      |      |
| Section 72                           |        |                                                                                                    |      |      |      |      |      |      |      |      |      |      |
| HIV-1 HXB2<br>SARS-CoV-2 NC_045512.2 | (6888) | 6888                                                                                               | 6900 | 6910 | 6920 | 6930 | 6940 | 6950 | 6960 | 6970 | 6984 |      |
|                                      | (1)    | -----                                                                                              |      |      |      |      |      |      |      |      |      |      |
| HIV-1 HXB2<br>SARS-CoV-2 NC_045512.2 | (6888) | AATTTTGTCTAGAGGCTTCATTTAATTATTTGAAGTCACCTAATTTTCTAAACTGATAAATATTATAAATTTGGTTTTTACTATTAAGTGTTCCT    |      |      |      |      |      |      |      |      |      |      |
|                                      | (6888) |                                                                                                    |      |      |      |      |      |      |      |      |      |      |
| Section 73                           |        |                                                                                                    |      |      |      |      |      |      |      |      |      |      |
| HIV-1 HXB2<br>SARS-CoV-2 NC_045512.2 | (6985) | 6985                                                                                               | 6990 | 7000 | 7010 | 7020 | 7030 | 7040 | 7050 | 7060 | 7070 | 7081 |
|                                      | (1)    | -----                                                                                              |      |      |      |      |      |      |      |      |      |      |
| HIV-1 HXB2<br>SARS-CoV-2 NC_045512.2 | (6985) | AGGTTCTTTAATCTACTCAACCGCTGCTTTAGGTGTTTTAATGTCTAATTTAGGCATGCCTTCTTACTGTACTGGTTACAGAGAAGGCTATTTGAAC  |      |      |      |      |      |      |      |      |      |      |
|                                      | (6985) |                                                                                                    |      |      |      |      |      |      |      |      |      |      |
| Section 74                           |        |                                                                                                    |      |      |      |      |      |      |      |      |      |      |
| HIV-1 HXB2<br>SARS-CoV-2 NC_045512.2 | (7082) | 7082                                                                                               | 7090 | 7100 | 7110 | 7120 | 7130 | 7140 | 7150 | 7160 | 7178 |      |
|                                      | (1)    | -----                                                                                              |      |      |      |      |      |      |      |      |      |      |
| HIV-1 HXB2<br>SARS-CoV-2 NC_045512.2 | (7082) | TCTACTAATGTCACTATTGCAACCTACTGTACTGGTTCTATACCTTGTAGTGTTTGTCTTAGTGTTTAGATTCTTTAGACACCTATCCTTCTTTAG   |      |      |      |      |      |      |      |      |      |      |
|                                      | (7082) |                                                                                                    |      |      |      |      |      |      |      |      |      |      |
| Section 75                           |        |                                                                                                    |      |      |      |      |      |      |      |      |      |      |
| HIV-1 HXB2<br>SARS-CoV-2 NC_045512.2 | (7179) | 7179                                                                                               | 7190 | 7200 | 7210 | 7220 | 7230 | 7240 | 7250 | 7260 | 7275 |      |
|                                      | (1)    | -----                                                                                              |      |      |      |      |      |      |      |      |      |      |
| HIV-1 HXB2<br>SARS-CoV-2 NC_045512.2 | (7179) | AAACTATACAAATTACCATTTTCATCTTTTAAATGGGATTTAACTGCTTTTGGCTTAGTTGCAGAGTGGTTTTTGGCATATATTCTTTTCACTAGGTT |      |      |      |      |      |      |      |      |      |      |
|                                      | (7179) |                                                                                                    |      |      |      |      |      |      |      |      |      |      |
| Section 76                           |        |                                                                                                    |      |      |      |      |      |      |      |      |      |      |
| HIV-1 HXB2<br>SARS-CoV-2 NC_045512.2 | (7276) | 7276                                                                                               | 7290 | 7300 | 7310 | 7320 | 7330 | 7340 | 7350 | 7360 | 7372 |      |
|                                      | (1)    | -----                                                                                              |      |      |      |      |      |      |      |      |      |      |
| HIV-1 HXB2<br>SARS-CoV-2 NC_045512.2 | (7276) | TTTCTATGTACTTGGATTGGCTGCAATCATGCAATTGTTTTTTCAGCTATTTTGCAGTACATTTTATTAGTAATTCTTGGCTTATGTGGTTAATAATT |      |      |      |      |      |      |      |      |      |      |
|                                      | (7276) |                                                                                                    |      |      |      |      |      |      |      |      |      |      |
| Section 77                           |        |                                                                                                    |      |      |      |      |      |      |      |      |      |      |
| HIV-1 HXB2<br>SARS-CoV-2 NC_045512.2 | (7373) | 7373                                                                                               | 7380 | 7390 | 7400 | 7410 | 7420 | 7430 | 7440 | 7450 | 7469 |      |
|                                      | (1)    | -----                                                                                              |      |      |      |      |      |      |      |      |      |      |
| HIV-1 HXB2<br>SARS-CoV-2 NC_045512.2 | (7373) | AATCTTGTAACAAATGGCCCCGATTTTCAGCTATGGTTAGAATGTACATCTTCTTTCATCATTTTATTATGTATGGAAAAGTTATGTGCATGTTGTAG |      |      |      |      |      |      |      |      |      |      |
|                                      | (7373) |                                                                                                    |      |      |      |      |      |      |      |      |      |      |

## SARS-CoV-2 &amp; HIV-1.apr

|                        |        |                                                                                                    |      |      |      |      |      |      |      |      |           |
|------------------------|--------|----------------------------------------------------------------------------------------------------|------|------|------|------|------|------|------|------|-----------|
| Section 78             |        |                                                                                                    |      |      |      |      |      |      |      |      |           |
| HIV-1 HXB2             | (7470) | 7470                                                                                               | 7480 | 7490 | 7500 | 7510 | 7520 | 7530 | 7540 | 7550 | 7566      |
| SARS-CoV-2 NC_045512.2 | (7470) | ACGGTTGTAATTCATCAACTTGTATGATGTGTTACAAACGTAATAGAGCAACAAGAGTCGAATGTACAACATTGTTAATGGTGTTAGAAGGTCCTT   |      |      |      |      |      |      |      |      |           |
| Section 79             |        |                                                                                                    |      |      |      |      |      |      |      |      |           |
| HIV-1 HXB2             | (7567) | 7567                                                                                               | 7580 | 7590 | 7600 | 7610 | 7620 | 7630 | 7640 | 7650 | 7663      |
| SARS-CoV-2 NC_045512.2 | (7567) | TTATGTCTATGCTAATGGAGGTAAAGGCTTTTGCAAACCTACACAATTGGAATTGTGTTAATTGTGATACATTCTGTGCTGGTAGTACATTTATTAGT |      |      |      |      |      |      |      |      |           |
| Section 80             |        |                                                                                                    |      |      |      |      |      |      |      |      |           |
| HIV-1 HXB2             | (7664) | 7664                                                                                               | 7670 | 7680 | 7690 | 7700 | 7710 | 7720 | 7730 | 7740 | 7750 7760 |
| SARS-CoV-2 NC_045512.2 | (7664) | GATGAAGTTGCGAGAGACTTGTCACTACAGTTTAAAAAGACCAATAAATCCTACTGACCAGTCTTCTTACATCGTTGATAGTGTTACAGTGAAGAATG |      |      |      |      |      |      |      |      |           |
| Section 81             |        |                                                                                                    |      |      |      |      |      |      |      |      |           |
| HIV-1 HXB2             | (7761) | 7761                                                                                               | 7770 | 7780 | 7790 | 7800 | 7810 | 7820 | 7830 | 7840 | 7857      |
| SARS-CoV-2 NC_045512.2 | (7761) | GTTCCATCCATCTTTACTTTGATAAAGCTGGTCAAAAAGACTTATGAAAGACATTCTCTCTCTCATTTTGTTAACTTAGACAACCTGAGAGCTAATAA |      |      |      |      |      |      |      |      |           |
| Section 82             |        |                                                                                                    |      |      |      |      |      |      |      |      |           |
| HIV-1 HXB2             | (7858) | 7858                                                                                               | 7870 | 7880 | 7890 | 7900 | 7910 | 7920 | 7930 | 7940 | 7954      |
| SARS-CoV-2 NC_045512.2 | (7858) | CACTAAAGGTTTCATTGCCTATTAATGTTATAGTTTTTGATGGTAAATCAAAATGTGAAGAATCATCTGCAAAATCAGCGTCTGTTTACTACAGTCAG |      |      |      |      |      |      |      |      |           |
| Section 83             |        |                                                                                                    |      |      |      |      |      |      |      |      |           |
| HIV-1 HXB2             | (7955) | 7955                                                                                               | 7960 | 7970 | 7980 | 7990 | 8000 | 8010 | 8020 | 8030 | 8040 8051 |
| SARS-CoV-2 NC_045512.2 | (7955) | CTTATGTGTCAACCTATACTGTTACTAGATCAGGCATTAGTGTCTGATGTTGGTGATAGTGCGGAAGTTGCAGTTAAATGTTTGATGCTTACGTTA   |      |      |      |      |      |      |      |      |           |
| Section 84             |        |                                                                                                    |      |      |      |      |      |      |      |      |           |
| HIV-1 HXB2             | (8052) | 8052                                                                                               | 8060 | 8070 | 8080 | 8090 | 8100 | 8110 | 8120 | 8130 | 8148      |
| SARS-CoV-2 NC_045512.2 | (8052) | ATACGTTTTTCATCAACTTTTAAACGTACCAATGGAAAACTCAAAACACTAGTTGCAACTGCAGAAGCTGAAGTTGCAAGAATGTGTCCTTAGACAA  |      |      |      |      |      |      |      |      |           |

## SARS-CoV-2 &amp; HIV-1.apr

|                                      |        |                                                                                                    |      |      |      |      |      |      |      |      |           |
|--------------------------------------|--------|----------------------------------------------------------------------------------------------------|------|------|------|------|------|------|------|------|-----------|
|                                      |        | Section 85                                                                                         |      |      |      |      |      |      |      |      |           |
| HIV-1 HXB2<br>SARS-CoV-2 NC_045512.2 | (8149) | 8149                                                                                               | 8160 | 8170 | 8180 | 8190 | 8200 | 8210 | 8220 | 8230 | 8245      |
|                                      | (1)    | -----                                                                                              |      |      |      |      |      |      |      |      |           |
|                                      | (8149) | TGTCTTATCTACTTTTATTTTCAGCAGCTCGGCAAGGGTTTGTTGATTGATGTAGAACTAAAGATGTTGTTGAATGTCTTAAATTGTCACATCAA    |      |      |      |      |      |      |      |      |           |
|                                      |        | Section 86                                                                                         |      |      |      |      |      |      |      |      |           |
| HIV-1 HXB2<br>SARS-CoV-2 NC_045512.2 | (8246) | 8246                                                                                               | 8260 | 8270 | 8280 | 8290 | 8300 | 8310 | 8320 | 8330 | 8342      |
|                                      | (1)    | -----                                                                                              |      |      |      |      |      |      |      |      |           |
|                                      | (8246) | TCTGACATAGAAGTTACTGGCGATAGTTGTAATAACTATATGCTCACCTATAACAAAGTTGAAAACATGACACCCCGTGACCTTGGTGCTTGATTG   |      |      |      |      |      |      |      |      |           |
|                                      |        | Section 87                                                                                         |      |      |      |      |      |      |      |      |           |
| HIV-1 HXB2<br>SARS-CoV-2 NC_045512.2 | (8343) | 8343                                                                                               | 8350 | 8360 | 8370 | 8380 | 8390 | 8400 | 8410 | 8420 | 8439      |
|                                      | (1)    | -----                                                                                              |      |      |      |      |      |      |      |      |           |
|                                      | (8343) | ACTGTAGTGCGCGTCATATTAATGCGCAGGTAGCAAAAAGTCACAACATTGCTTTGATATGGAACGTTAAAGATTTTCATGTCATTGTCTGAACAACT |      |      |      |      |      |      |      |      |           |
|                                      |        | Section 88                                                                                         |      |      |      |      |      |      |      |      |           |
| HIV-1 HXB2<br>SARS-CoV-2 NC_045512.2 | (8440) | 8440                                                                                               | 8450 | 8460 | 8470 | 8480 | 8490 | 8500 | 8510 | 8520 | 8536      |
|                                      | (1)    | -----                                                                                              |      |      |      |      |      |      |      |      |           |
|                                      | (8440) | ACGAAAACAAATACGTAGTGCTGCTAAAAAGAATAACTTACCTTTTAAAGTTGACATGTGCAACTACTAGACAAGTTGTTAATGTTGTAACAACAAAG |      |      |      |      |      |      |      |      |           |
|                                      |        | Section 89                                                                                         |      |      |      |      |      |      |      |      |           |
| HIV-1 HXB2<br>SARS-CoV-2 NC_045512.2 | (8537) | 8537                                                                                               | 8550 | 8560 | 8570 | 8580 | 8590 | 8600 | 8610 | 8620 | 8633      |
|                                      | (1)    | -----                                                                                              |      |      |      |      |      |      |      |      |           |
|                                      | (8537) | ATAGCACTTAAGGGTGGTAAAATTGTTAATAATTGGTTGAAGCAGTTAATTAAAGTTACACTTGTGTTCTTTTTGTTGCTGCTATTTTCTATTTAA   |      |      |      |      |      |      |      |      |           |
|                                      |        | Section 90                                                                                         |      |      |      |      |      |      |      |      |           |
| HIV-1 HXB2<br>SARS-CoV-2 NC_045512.2 | (8634) | 8634                                                                                               | 8640 | 8650 | 8660 | 8670 | 8680 | 8690 | 8700 | 8710 | 8720 8730 |
|                                      | (1)    | -----                                                                                              |      |      |      |      |      |      |      |      |           |
|                                      | (8634) | TAACACCTGTTTCATGTCATGTCTAAACATACTGACTTTTCAAGTGAAATCATAGGATACAAGGCTATTGATGGTGGTGTCACTCGTGACATAGCATC |      |      |      |      |      |      |      |      |           |
|                                      |        | Section 91                                                                                         |      |      |      |      |      |      |      |      |           |
| HIV-1 HXB2<br>SARS-CoV-2 NC_045512.2 | (8731) | 8731                                                                                               | 8740 | 8750 | 8760 | 8770 | 8780 | 8790 | 8800 | 8810 | 8827      |
|                                      | (1)    | -----                                                                                              |      |      |      |      |      |      |      |      |           |
|                                      | (8731) | TACAGATACTTGTTTTGCTAACAAACATGCTGATTTTGACACATGGTTTAGCCAGCGTGGTGGTAGTTATACTAATGACAAAGCTTGCCCATTGATT  |      |      |      |      |      |      |      |      |           |

## SARS-CoV-2 &amp; HIV-1.apr

|                        |        |                                                                                                    |      |      |      |      |      |      |      |      |            |
|------------------------|--------|----------------------------------------------------------------------------------------------------|------|------|------|------|------|------|------|------|------------|
|                        |        |                                                                                                    |      |      |      |      |      |      |      |      | Section 92 |
|                        | (8828) | 8828                                                                                               | 8840 | 8850 | 8860 | 8870 | 8880 | 8890 | 8900 | 8910 | 8924       |
| HIV-1 HXB2             | (1)    | -----                                                                                              |      |      |      |      |      |      |      |      |            |
| SARS-CoV-2 NC_045512.2 | (8828) | GCTGCAGTCATAACAAGAGAAGTGGGTTTGTCTGCTGCCTGGTTTGCCTGGCACGATATTACGCACAACCTAATGGTGACTTTTGCATTTCTTACCTA |      |      |      |      |      |      |      |      |            |
|                        |        |                                                                                                    |      |      |      |      |      |      |      |      | Section 93 |
|                        | (8925) | 8925                                                                                               | 8930 | 8940 | 8950 | 8960 | 8970 | 8980 | 8990 | 9000 | 9010 9021  |
| HIV-1 HXB2             | (1)    | -----                                                                                              |      |      |      |      |      |      |      |      |            |
| SARS-CoV-2 NC_045512.2 | (8925) | GAGTTTTTAGTGCAGTTGGTAACATCTGTTACACACCATCAAACTTATAGAGTACACTGACTTTGCAACATCAGCTTGTGTTTTGGCTGCTGAATG   |      |      |      |      |      |      |      |      |            |
|                        |        |                                                                                                    |      |      |      |      |      |      |      |      | Section 94 |
|                        | (9022) | 9022                                                                                               | 9030 | 9040 | 9050 | 9060 | 9070 | 9080 | 9090 | 9100 | 9118       |
| HIV-1 HXB2             | (1)    | -----                                                                                              |      |      |      |      |      |      |      |      |            |
| SARS-CoV-2 NC_045512.2 | (9022) | TACAATTTTAAAGATGCTTCTGGTAAGCCAGTACCATATTGTTATGATACCAATGTACTAGAAGGTTCTGTTGCTTATGAAAGTTTACGCCCTGAC   |      |      |      |      |      |      |      |      |            |
|                        |        |                                                                                                    |      |      |      |      |      |      |      |      | Section 95 |
|                        | (9119) | 9119                                                                                               | 9130 | 9140 | 9150 | 9160 | 9170 | 9180 | 9190 | 9200 | 9215       |
| HIV-1 HXB2             | (1)    | -----                                                                                              |      |      |      |      |      |      |      |      |            |
| SARS-CoV-2 NC_045512.2 | (9119) | ACACGTTATGTGCTCATGGATGGCTCTATTATTCAATTTCTTAACACCTACCTTGAAGGTTCTGTTAGAGTGGTAACAACCTTTGATTCTGAGTACT  |      |      |      |      |      |      |      |      |            |
|                        |        |                                                                                                    |      |      |      |      |      |      |      |      | Section 96 |
|                        | (9216) | 9216                                                                                               | 9230 | 9240 | 9250 | 9260 | 9270 | 9280 | 9290 | 9300 | 9312       |
| HIV-1 HXB2             | (1)    | -----                                                                                              |      |      |      |      |      |      |      |      |            |
| SARS-CoV-2 NC_045512.2 | (9216) | GTAGGCACGGCACTTGTGAAAGATCAGAAGCTGGTGTGTTGTGTATCTACTAGTGGTAGATGGGTACTTAACAATGATTATTACAGATCTTTACCAGG |      |      |      |      |      |      |      |      |            |
|                        |        |                                                                                                    |      |      |      |      |      |      |      |      | Section 97 |
|                        | (9313) | 9313                                                                                               | 9320 | 9330 | 9340 | 9350 | 9360 | 9370 | 9380 | 9390 | 9409       |
| HIV-1 HXB2             | (1)    | -----                                                                                              |      |      |      |      |      |      |      |      |            |
| SARS-CoV-2 NC_045512.2 | (9313) | AGTTTTCTGTGGTGTAGATGCTGTAAATTTACTTACTAATATGTTTACACCACTAATTCAACCTATTGGTGCTTTGGACATATCAGCATCTATAGTA  |      |      |      |      |      |      |      |      |            |
|                        |        |                                                                                                    |      |      |      |      |      |      |      |      | Section 98 |
|                        | (9410) | 9410                                                                                               | 9420 | 9430 | 9440 | 9450 | 9460 | 9470 | 9480 | 9490 | 9506       |
| HIV-1 HXB2             | (1)    | -----                                                                                              |      |      |      |      |      |      |      |      |            |
| SARS-CoV-2 NC_045512.2 | (9410) | GCTGGTGGTATTGTAGCTATCGTAGTAACATGCCTTGCCTACTATTTTATGAGGTTTAGAAGAGCTTTTGGTGAATACAGTCATGTAGTTGCCTTTA  |      |      |      |      |      |      |      |      |            |

## SARS-CoV-2 &amp; HIV-1.apr

|                                      |         |                                                                                                    |       |       |       |       |       |       |       |       |             |
|--------------------------------------|---------|----------------------------------------------------------------------------------------------------|-------|-------|-------|-------|-------|-------|-------|-------|-------------|
|                                      |         |                                                                                                    |       |       |       |       |       |       |       |       | Section 99  |
| HIV-1 HXB2<br>SARS-CoV-2 NC_045512.2 | (9507)  | 9507                                                                                               | 9520  | 9530  | 9540  | 9550  | 9560  | 9570  | 9580  | 9590  | 9603        |
|                                      | (1)     | -----                                                                                              |       |       |       |       |       |       |       |       |             |
|                                      | (9507)  | ATACTTTACTATTTCCTTATGTCATTCACTGTACTCTGTTTAACACCAGTTTACTCATTCTTACCTGGTGTTTATTCTGTTATTTACTTGTACTTGAC |       |       |       |       |       |       |       |       |             |
|                                      |         |                                                                                                    |       |       |       |       |       |       |       |       | Section 100 |
| HIV-1 HXB2<br>SARS-CoV-2 NC_045512.2 | (9604)  | 9604                                                                                               | 9610  | 9620  | 9630  | 9640  | 9650  | 9660  | 9670  | 9680  | 9690 9700   |
|                                      | (1)     | -----                                                                                              |       |       |       |       |       |       |       |       |             |
|                                      | (9604)  | ATTTTATCTTACTAATGATGTTTCTTTTTCAGTGGATGGTTATGTTTACACCTTTAGTACCTTTCTGGATAACAATTGCTTATATC             |       |       |       |       |       |       |       |       |             |
|                                      |         |                                                                                                    |       |       |       |       |       |       |       |       | Section 101 |
| HIV-1 HXB2<br>SARS-CoV-2 NC_045512.2 | (9701)  | 9701                                                                                               | 9710  | 9720  | 9730  | 9740  | 9750  | 9760  | 9770  | 9780  | 9797        |
|                                      | (1)     | -----                                                                                              |       |       |       |       |       |       |       |       |             |
|                                      | (9701)  | ATTTGTATTTCCACAAAGCATTTCTATTGGTTCTTTAGTAATTACCTAAAGAGACGTGTAGTCTTTAATGGTGTTTCCTTTAGTACTTTGAAGAAG   |       |       |       |       |       |       |       |       |             |
|                                      |         |                                                                                                    |       |       |       |       |       |       |       |       | Section 102 |
| HIV-1 HXB2<br>SARS-CoV-2 NC_045512.2 | (9798)  | 9798                                                                                               | 9810  | 9820  | 9830  | 9840  | 9850  | 9860  | 9870  | 9880  | 9894        |
|                                      | (1)     | -----                                                                                              |       |       |       |       |       |       |       |       |             |
|                                      | (9798)  | CTGCGCTGTGCACCTTTTTGTTAAATAAAGAAATGTATCTAAAGTTGCGTAGTGATGTGCTATTACCTCTTACGCAATATAATAGATACTTAGCTCT  |       |       |       |       |       |       |       |       |             |
|                                      |         |                                                                                                    |       |       |       |       |       |       |       |       | Section 103 |
| HIV-1 HXB2<br>SARS-CoV-2 NC_045512.2 | (9895)  | 9895                                                                                               | 9900  | 9910  | 9920  | 9930  | 9940  | 9950  | 9960  | 9970  | 9980 9991   |
|                                      | (1)     | -----                                                                                              |       |       |       |       |       |       |       |       |             |
|                                      | (9895)  | TTATAATAAGTACAAGTATTTTAGTGGAGCAATGGATACAACCTAGCTACAGAGAAGCTGCTTGTTGTCATCTCGCAAAGGCTCTCAATGACTTCAGT |       |       |       |       |       |       |       |       |             |
|                                      |         |                                                                                                    |       |       |       |       |       |       |       |       | Section 104 |
| HIV-1 HXB2<br>SARS-CoV-2 NC_045512.2 | (9992)  | 9992                                                                                               | 10000 | 10010 | 10020 | 10030 | 10040 | 10050 | 10060 | 10070 | 10088       |
|                                      | (1)     | -----                                                                                              |       |       |       |       |       |       |       |       |             |
|                                      | (9992)  | AACTCAGGTTCTGATGTTCTTTACCAACCACCACAAACCTCTATCACCTCAGCTGTTTTGCAGAGTGTTTTAGAAAAATGGCATTCCCATCTGGTA   |       |       |       |       |       |       |       |       |             |
|                                      |         |                                                                                                    |       |       |       |       |       |       |       |       | Section 105 |
| HIV-1 HXB2<br>SARS-CoV-2 NC_045512.2 | (10089) | 10089                                                                                              | 10100 | 10110 | 10120 | 10130 | 10140 | 10150 | 10160 | 10170 | 10185       |
|                                      | (1)     | -----                                                                                              |       |       |       |       |       |       |       |       |             |
|                                      | (10089) | AAGTTGAGGGTTGTATGGTACAAGTAACCTTGTGGTACAACCTAACGGTCTTTGGCTTGATGACGTAGTTTACTGTCCAAGACATGTGATCTG      |       |       |       |       |       |       |       |       |             |

## SARS-CoV-2 &amp; HIV-1.apr

|                        |         |                                                                                                     |       |       |       |       |       |       |       |       |             |       |
|------------------------|---------|-----------------------------------------------------------------------------------------------------|-------|-------|-------|-------|-------|-------|-------|-------|-------------|-------|
|                        |         |                                                                                                     |       |       |       |       |       |       |       |       | Section 106 |       |
|                        | (10186) | 10186                                                                                               | 10200 | 10210 | 10220 | 10230 | 10240 | 10250 | 10260 | 10270 | 10282       |       |
| HIV-1 HXB2             | (1)     | -----                                                                                               |       |       |       |       |       |       |       |       |             |       |
| SARS-CoV-2 NC_045512.2 | (10186) | CACCTCTGAAGACATGCTTAACCCCTAATTATGAAGATTTACTCATTCGTAAGTCTAATCATAATTTCTTGGTACAGGCTGGTAATGTTCAACTCAGG  |       |       |       |       |       |       |       |       |             |       |
|                        |         |                                                                                                     |       |       |       |       |       |       |       |       | Section 107 |       |
|                        | (10283) | 10283                                                                                               | 10290 | 10300 | 10310 | 10320 | 10330 | 10340 | 10350 | 10360 | 10379       |       |
| HIV-1 HXB2             | (1)     | -----                                                                                               |       |       |       |       |       |       |       |       |             |       |
| SARS-CoV-2 NC_045512.2 | (10283) | GTTATTGGACATTCTATGCAAAATTGTGTACTTAAGCTTAAGGTTGATACAGCCAATCCTAAGACACCTAAGTATAAGTTTGTTCGCATTCAACCAG   |       |       |       |       |       |       |       |       |             |       |
|                        |         |                                                                                                     |       |       |       |       |       |       |       |       | Section 108 |       |
|                        | (10380) | 10380                                                                                               | 10390 | 10400 | 10410 | 10420 | 10430 | 10440 | 10450 | 10460 | 10476       |       |
| HIV-1 HXB2             | (1)     | -----                                                                                               |       |       |       |       |       |       |       |       |             |       |
| SARS-CoV-2 NC_045512.2 | (10380) | GACAGACTTTTTTCAGTGTTAGCTTGTTACAATGGTTCACCATCTGGTGTTTACCAATGTGCTATGAGGCCCAATTTCACTATTAAGGGTTCATTCCCT |       |       |       |       |       |       |       |       |             |       |
|                        |         |                                                                                                     |       |       |       |       |       |       |       |       | Section 109 |       |
|                        | (10477) | 10477                                                                                               | 10490 | 10500 | 10510 | 10520 | 10530 | 10540 | 10550 | 10560 | 10573       |       |
| HIV-1 HXB2             | (1)     | -----                                                                                               |       |       |       |       |       |       |       |       |             |       |
| SARS-CoV-2 NC_045512.2 | (10477) | TAATGGTTCATGTGGTAGTGTTGGTTTTAACATAGATTATGACTGTGTCTCTTTTTGTTACATGCACCATATGGAATTACCAACTGGAGTTCATGCT   |       |       |       |       |       |       |       |       |             |       |
|                        |         |                                                                                                     |       |       |       |       |       |       |       |       | Section 110 |       |
|                        | (10574) | 10574                                                                                               | 10580 | 10590 | 10600 | 10610 | 10620 | 10630 | 10640 | 10650 | 10660       | 10670 |
| HIV-1 HXB2             | (1)     | -----                                                                                               |       |       |       |       |       |       |       |       |             |       |
| SARS-CoV-2 NC_045512.2 | (10574) | GGCACAGACTTAGAAGGTAACCTTTTATGGACCTTTTGTGACAGGCAAACAGCACAAGCAGCTGGTACGGACACAACCTATTACAGTTAATGTTTTAG  |       |       |       |       |       |       |       |       |             |       |
|                        |         |                                                                                                     |       |       |       |       |       |       |       |       | Section 111 |       |
|                        | (10671) | 10671                                                                                               | 10680 | 10690 | 10700 | 10710 | 10720 | 10730 | 10740 | 10750 | 10767       |       |
| HIV-1 HXB2             | (1)     | -----                                                                                               |       |       |       |       |       |       |       |       |             |       |
| SARS-CoV-2 NC_045512.2 | (10671) | CTTGTTGTACGCTGCTGTTATAAATGGAGACAGGTGGTTTCTCAATCGATTTACCACAACCTCTTAATGACTTTAACCTTGTGGCTATGAAGTACAA   |       |       |       |       |       |       |       |       |             |       |
|                        |         |                                                                                                     |       |       |       |       |       |       |       |       | Section 112 |       |
|                        | (10768) | 10768                                                                                               | 10780 | 10790 | 10800 | 10810 | 10820 | 10830 | 10840 | 10850 | 10864       |       |
| HIV-1 HXB2             | (1)     | -----                                                                                               |       |       |       |       |       |       |       |       |             |       |
| SARS-CoV-2 NC_045512.2 | (10768) | TTATGAACCTCTAACACAAGACCATGTTGACATACTAGGACCTCTTCTGCTCAAACCTGGAATTGCCGTTTTAGATATGTGTGCTTCATTAAAAGAA   |       |       |       |       |       |       |       |       |             |       |



SARS-CoV-2 & HIV-1.apr

|                        |         |                                                                                                    |       |       |       |       |       |       |       |       |       |       |
|------------------------|---------|----------------------------------------------------------------------------------------------------|-------|-------|-------|-------|-------|-------|-------|-------|-------|-------|
| Section 113            |         |                                                                                                    |       |       |       |       |       |       |       |       |       |       |
|                        | (10865) | 10865                                                                                              | 10870 | 10880 | 10890 | 10900 | 10910 | 10920 | 10930 | 10940 | 10950 | 10961 |
| HIV-1 HXB2             | (1)     | -----                                                                                              |       |       |       |       |       |       |       |       |       |       |
| SARS-CoV-2 NC_045512.2 | (10865) | TTACTGCAAAATGGTATGAATGGACGTACCATATTGGGTAGTGCTTTATTAGAAGATGAATTTACACCTTTTGATGTTGTTAGACAATGCTCAGGTG  |       |       |       |       |       |       |       |       |       |       |
| Section 114            |         |                                                                                                    |       |       |       |       |       |       |       |       |       |       |
|                        | (10962) | 10962                                                                                              | 10970 | 10980 | 10990 | 11000 | 11010 | 11020 | 11030 | 11040 |       | 11058 |
| HIV-1 HXB2             | (1)     | -----                                                                                              |       |       |       |       |       |       |       |       |       |       |
| SARS-CoV-2 NC_045512.2 | (10962) | TTACTTTCCAAAGTGCAGTGAAAAGAACAATCAAGGGTACACACCACTGGTTGTTACTCACAATTTTGACTTCACTTTTAGTTTTAGTCCAGAGTAC  |       |       |       |       |       |       |       |       |       |       |
| Section 115            |         |                                                                                                    |       |       |       |       |       |       |       |       |       |       |
|                        | (11059) | 11059                                                                                              | 11070 | 11080 | 11090 | 11100 | 11110 | 11120 | 11130 | 11140 |       | 11155 |
| HIV-1 HXB2             | (1)     | -----                                                                                              |       |       |       |       |       |       |       |       |       |       |
| SARS-CoV-2 NC_045512.2 | (11059) | TCAATGGTCTTTGTTCTTTTTTTTGTATGAAAATGCCTTTTTTACCTTTTGCTATGGGTATTATTGCTATGTCTGCTTTTGCAATGATGTTTGTCAAA |       |       |       |       |       |       |       |       |       |       |
| Section 116            |         |                                                                                                    |       |       |       |       |       |       |       |       |       |       |
|                        | (11156) | 11156                                                                                              | 11170 | 11180 | 11190 | 11200 | 11210 | 11220 | 11230 | 11240 |       | 11252 |
| HIV-1 HXB2             | (1)     | -----                                                                                              |       |       |       |       |       |       |       |       |       |       |
| SARS-CoV-2 NC_045512.2 | (11156) | CATAAGCATGCATTTCTCTGTTTGTGTTTGTACCTTCTCTTGCCACTGTAGCTTATTTTAATATGGTCTATATGCCTGCTAGTTGGGTGATGCGTA   |       |       |       |       |       |       |       |       |       |       |
| Section 117            |         |                                                                                                    |       |       |       |       |       |       |       |       |       |       |
|                        | (11253) | 11253                                                                                              | 11260 | 11270 | 11280 | 11290 | 11300 | 11310 | 11320 | 11330 |       | 11349 |
| HIV-1 HXB2             | (1)     | -----                                                                                              |       |       |       |       |       |       |       |       |       |       |
| SARS-CoV-2 NC_045512.2 | (11253) | TTATGACATGGTTGGATATGGTTGATACTAGTTTGTCTGGTTTTAAGCTAAAAGACTGTGTTATGTATGCATCAGCTGTAGTGTTACTAATCCTTAT  |       |       |       |       |       |       |       |       |       |       |
| Section 118            |         |                                                                                                    |       |       |       |       |       |       |       |       |       |       |
|                        | (11350) | 11350                                                                                              | 11360 | 11370 | 11380 | 11390 | 11400 | 11410 | 11420 | 11430 |       | 11446 |
| HIV-1 HXB2             | (1)     | -----                                                                                              |       |       |       |       |       |       |       |       |       |       |
| SARS-CoV-2 NC_045512.2 | (11350) | GACAGCAAGAACTGTGTATGATGATGGTGCTAGGAGAGTGTGGACACTTATGAATGTCTTGACACTCGTTTATAAAGTTTATTATGGTAATGCTTTA  |       |       |       |       |       |       |       |       |       |       |
| Section 119            |         |                                                                                                    |       |       |       |       |       |       |       |       |       |       |
|                        | (11447) | 11447                                                                                              | 11460 | 11470 | 11480 | 11490 | 11500 | 11510 | 11520 | 11530 |       | 11543 |
| HIV-1 HXB2             | (1)     | -----                                                                                              |       |       |       |       |       |       |       |       |       |       |
| SARS-CoV-2 NC_045512.2 | (11447) | GATCAAGCCATTTCCATGTGGGCTCTTATAATCTCTGTTACTTCTAACTACTCAGGTGTAGTTACAACGTGCATGTTTTTGGCCAGAGGTATTGTTT  |       |       |       |       |       |       |       |       |       |       |

## SARS-CoV-2 &amp; HIV-1.apr

|                        |         |                                                                                                    |       |       |       |       |       |       |       |       |       |             |
|------------------------|---------|----------------------------------------------------------------------------------------------------|-------|-------|-------|-------|-------|-------|-------|-------|-------|-------------|
|                        |         |                                                                                                    |       |       |       |       |       |       |       |       |       | Section 120 |
|                        | (11544) | 11544                                                                                              | 11550 | 11560 | 11570 | 11580 | 11590 | 11600 | 11610 | 11620 | 11630 | 11640       |
| HIV-1 HXB2             | (1)     | -----                                                                                              |       |       |       |       |       |       |       |       |       |             |
| SARS-CoV-2 NC_045512.2 | (11544) | TTATGTGTGTTGAGTATTGCCCTATTTTCTTCATAACTGGTAATACACTTCAGTGTATAATGCTAGTTTATTGTTTCTTAGGCTATTTTTGTACTTG  |       |       |       |       |       |       |       |       |       |             |
|                        |         |                                                                                                    |       |       |       |       |       |       |       |       |       | Section 121 |
|                        | (11641) | 11641                                                                                              | 11650 | 11660 | 11670 | 11680 | 11690 | 11700 | 11710 | 11720 |       | 11737       |
| HIV-1 HXB2             | (1)     | -----                                                                                              |       |       |       |       |       |       |       |       |       |             |
| SARS-CoV-2 NC_045512.2 | (11641) | TTACTTTGGCCTCTTTTGTTTACTCAACCGCTACTTTAGACTGACTCTTGGTGTTTATGATTACTTAGTTTCTACACAGGAGTTTAGATATATGAAT  |       |       |       |       |       |       |       |       |       |             |
|                        |         |                                                                                                    |       |       |       |       |       |       |       |       |       | Section 122 |
|                        | (11738) | 11738                                                                                              | 11750 | 11760 | 11770 | 11780 | 11790 | 11800 | 11810 | 11820 |       | 11834       |
| HIV-1 HXB2             | (1)     | -----                                                                                              |       |       |       |       |       |       |       |       |       |             |
| SARS-CoV-2 NC_045512.2 | (11738) | TCACAGGGACTACTCCCACCCAAGAATAGCATAGATGCCTTCAAACCTCAACATTAAATTGTTGGGTGTTGGTGGCAAACCTTGTATCAAAGTAGCCA |       |       |       |       |       |       |       |       |       |             |
|                        |         |                                                                                                    |       |       |       |       |       |       |       |       |       | Section 123 |
|                        | (11835) | 11835                                                                                              | 11840 | 11850 | 11860 | 11870 | 11880 | 11890 | 11900 | 11910 | 11920 | 11931       |
| HIV-1 HXB2             | (1)     | -----                                                                                              |       |       |       |       |       |       |       |       |       |             |
| SARS-CoV-2 NC_045512.2 | (11835) | CTGTACAGTCTAAAATGTCAGATGTAAAGTGCACATCAGTAGTCTTACTCTCAGTTTTGCAACAACCTCAGAGTAGAATCATCATCTAAATTGTGGGC |       |       |       |       |       |       |       |       |       |             |
|                        |         |                                                                                                    |       |       |       |       |       |       |       |       |       | Section 124 |
|                        | (11932) | 11932                                                                                              | 11940 | 11950 | 11960 | 11970 | 11980 | 11990 | 12000 | 12010 |       | 12028       |
| HIV-1 HXB2             | (1)     | -----                                                                                              |       |       |       |       |       |       |       |       |       |             |
| SARS-CoV-2 NC_045512.2 | (11932) | TCAATGTGTCCAGTTACACAATGACATTCTCTTAGCTAAAGATACTACTGAAGCCTTTGAAAAAATGGTTTCACTACTTTCTGTTTTGCTTTCCATG  |       |       |       |       |       |       |       |       |       |             |
|                        |         |                                                                                                    |       |       |       |       |       |       |       |       |       | Section 125 |
|                        | (12029) | 12029                                                                                              | 12040 | 12050 | 12060 | 12070 | 12080 | 12090 | 12100 | 12110 |       | 12125       |
| HIV-1 HXB2             | (1)     | -----                                                                                              |       |       |       |       |       |       |       |       |       |             |
| SARS-CoV-2 NC_045512.2 | (12029) | CAGGGTGCTGTAGACATAAACAAAGCTTTGTGAAGAAATGCTGGACAACAGGGCAACCTTACAAGCTATAGCCTCAGAGTTTAGTTCCCTTCCATCAT |       |       |       |       |       |       |       |       |       |             |
|                        |         |                                                                                                    |       |       |       |       |       |       |       |       |       | Section 126 |
|                        | (12126) | 12126                                                                                              | 12140 | 12150 | 12160 | 12170 | 12180 | 12190 | 12200 | 12210 |       | 12222       |
| HIV-1 HXB2             | (1)     | -----                                                                                              |       |       |       |       |       |       |       |       |       |             |
| SARS-CoV-2 NC_045512.2 | (12126) | ATGCAGCTTTTGCTACTGCTCAAGAAGCTTATGAGCAGGCTGTTGCTAATGGTGATTCTGAAGTTGTTCTTAAAAAGTTGAAGAAGTCTTTGAATGT  |       |       |       |       |       |       |       |       |       |             |

## SARS-CoV-2 &amp; HIV-1.apr

|                        |         |                                                                                                    |       |       |       |       |       |       |       |       |             |
|------------------------|---------|----------------------------------------------------------------------------------------------------|-------|-------|-------|-------|-------|-------|-------|-------|-------------|
|                        |         |                                                                                                    |       |       |       |       |       |       |       |       | Section 127 |
|                        | (12223) | 12223                                                                                              | 12230 | 12240 | 12250 | 12260 | 12270 | 12280 | 12290 | 12300 | 12319       |
| HIV-1 HXB2             | (1)     | -----                                                                                              |       |       |       |       |       |       |       |       |             |
| SARS-CoV-2 NC_045512.2 | (12223) | GGCTAAATCTGAATTTGACCGTGATGCAGCCATGCAACGTAAGTTGGAAAAGATGGCTGATCAAGCTATGACCCAAATGTATAAACAGGCTAGATCT  |       |       |       |       |       |       |       |       |             |
|                        |         |                                                                                                    |       |       |       |       |       |       |       |       | Section 128 |
|                        | (12320) | 12320                                                                                              | 12330 | 12340 | 12350 | 12360 | 12370 | 12380 | 12390 | 12400 | 12416       |
| HIV-1 HXB2             | (1)     | -----                                                                                              |       |       |       |       |       |       |       |       |             |
| SARS-CoV-2 NC_045512.2 | (12320) | GAGGACAAGAGGGCAAAAGTTACTAGTGCTATGCAGACAATGCTTTTCACTATGCTTAGAAAGTTGGATAATGATGCACTCAACAACATTATCAACA  |       |       |       |       |       |       |       |       |             |
|                        |         |                                                                                                    |       |       |       |       |       |       |       |       | Section 129 |
|                        | (12417) | 12417                                                                                              | 12430 | 12440 | 12450 | 12460 | 12470 | 12480 | 12490 | 12500 | 12513       |
| HIV-1 HXB2             | (1)     | -----                                                                                              |       |       |       |       |       |       |       |       |             |
| SARS-CoV-2 NC_045512.2 | (12417) | ATGCAAGAGATGGTTGTGTTCCCTTGAACATAATACCTCTTACAACAGCAGCCAAACTAATGGTTGTCATACCAGACTATAACACATATAAAAAATAC |       |       |       |       |       |       |       |       |             |
|                        |         |                                                                                                    |       |       |       |       |       |       |       |       | Section 130 |
|                        | (12514) | 12514                                                                                              | 12520 | 12530 | 12540 | 12550 | 12560 | 12570 | 12580 | 12590 | 12600 12610 |
| HIV-1 HXB2             | (1)     | -----                                                                                              |       |       |       |       |       |       |       |       |             |
| SARS-CoV-2 NC_045512.2 | (12514) | GTGTGATGGTACAACATTTACTTATGCATCAGCATTGTGGGAAATCCAACAGGTTGTAGATGCAGATAGTAAAATTGTTCAACTTAGTGAAATTAGT  |       |       |       |       |       |       |       |       |             |
|                        |         |                                                                                                    |       |       |       |       |       |       |       |       | Section 131 |
|                        | (12611) | 12611                                                                                              | 12620 | 12630 | 12640 | 12650 | 12660 | 12670 | 12680 | 12690 | 12707       |
| HIV-1 HXB2             | (1)     | -----                                                                                              |       |       |       |       |       |       |       |       |             |
| SARS-CoV-2 NC_045512.2 | (12611) | ATGGACAATTACCTAATTTAGCATGGCCTCTTATTGTAACAGCTTTAAGGGCCAATTCTGCTGTCAAATTACAGAATAATGAGCTTAGTCCTGTTG   |       |       |       |       |       |       |       |       |             |
|                        |         |                                                                                                    |       |       |       |       |       |       |       |       | Section 132 |
|                        | (12708) | 12708                                                                                              | 12720 | 12730 | 12740 | 12750 | 12760 | 12770 | 12780 | 12790 | 12804       |
| HIV-1 HXB2             | (1)     | -----                                                                                              |       |       |       |       |       |       |       |       |             |
| SARS-CoV-2 NC_045512.2 | (12708) | CACTACGACAGATGTCTTGTGCTGCCGGTACTACACAACTGCTTGCACTGATGACAATGCGTTAGCTTACTACAACACAACAAGGGAGGTAGGTT    |       |       |       |       |       |       |       |       |             |
|                        |         |                                                                                                    |       |       |       |       |       |       |       |       | Section 133 |
|                        | (12805) | 12805                                                                                              | 12810 | 12820 | 12830 | 12840 | 12850 | 12860 | 12870 | 12880 | 12890 12901 |
| HIV-1 HXB2             | (1)     | -----                                                                                              |       |       |       |       |       |       |       |       |             |
| SARS-CoV-2 NC_045512.2 | (12805) | TGTACTTGCACTGTTATCCGATTTACAGGATTTGAAATGGGCTAGATTCCCTAAGAGTGATGGAAGTGGTACTATCTATACAGAAGTGAACACCT    |       |       |       |       |       |       |       |       |             |

SARS-CoV-2 & HIV-1.apr

|                        |         |              |                |              |                   |              |              |              |             |               |                           |                 |                 |           |
|------------------------|---------|--------------|----------------|--------------|-------------------|--------------|--------------|--------------|-------------|---------------|---------------------------|-----------------|-----------------|-----------|
|                        |         |              |                |              |                   |              |              |              |             |               |                           | Section 134     |                 |           |
|                        | (12902) | 12902        | 12910          | 12920        | 12930             | 12940        | 12950        | 12960        | 12970       | 12980         | 12998                     |                 |                 |           |
| HIV-1 HXB2             | (1)     | -----TGG     | AAGGGCTAA      | TTCACTCCAA   | CGAA--GA          | CAAGATATC    | CTTGATCTGT   | GATCTACCA    | CACACAAGG   | GCTTCCC       | TGATTAGC                  |                 |                 |           |
| SARS-CoV-2 NC_045512.2 | (12902) | TGTAGGTTTGT  | TACAGACA       | CACCTAAAGGT  | CCTA-AA           | AGTGAAAGTATT | TATACTTTAT   | TA-----      | AAGGA---TT  | AAACAAC       | C-----TAAATAG             |                 |                 |           |
|                        |         |              |                |              |                   |              |              |              |             |               |                           | Section 135     |                 |           |
|                        | (12999) | 12999        | 13010          | 13020        | 13030             | 13040        | 13050        | 13060        | 13070       | 13080         | 13095                     |                 |                 |           |
| HIV-1 HXB2             | (85)    | AGAACTAC     | ACACCAGG       | GCCAG---GGAT | CAG-ATA           | TCAC         | TGACCTTTGG   | ATGGTGCTAC   | AAGCTAGT    | ACCA          | GTAGCCAGAGAGTTAGAAAG      |                 |                 |           |
| SARS-CoV-2 NC_045512.2 | (12983) | GGTATGGT     | ACTTGGTA       | GTTTAGCTGCCA | CAGTACG           | TCAC         | AAGCTGG--T   | AATGCAAC     | AGAAGTGCC   | TGCCAATT      | CAA---CTGTATATCTTTCTG     |                 |                 |           |
|                        |         |              |                |              |                   |              |              |              |             |               |                           | Section 136     |                 |           |
|                        | (13096) | 13096        | 13110          | 13120        | 13130             | 13140        | 13150        | 13160        | 13170       | 13180         | 13192                     |                 |                 |           |
| HIV-1 HXB2             | (178)   | CCAACAAAGGAG | AGAACACCAGCTT  | GTACACCCTGT  | GAGGCTGC          | ATGGAATGG    | ATGACCGGAGAG | AGAA         | GTGTTAGAG   | TGGAGGT       | TTGACAGCCG                |                 |                 |           |
| SARS-CoV-2 NC_045512.2 | (13075) | TGCTTTTGCTGT | AGATGCTGCTAAAG | CTTACAAAGAT  | TATCTAG           | CTAGTGGG     | GGA          | CAACCAATCACT | AATTGTGTTA  | AGATGTT       | GTGTACACACT               |                 |                 |           |
|                        |         |              |                |              |                   |              |              |              |             |               |                           | Section 137     |                 |           |
|                        | (13193) | 13193        | 13200          | 13210        | 13220             | 13230        | 13240        | 13250        | 13260       | 13270         | 13289                     |                 |                 |           |
| HIV-1 HXB2             | (775)   | CCTAGCATT    | TCAATCAC       | ATGGCCG      | GAGAGCTGCAT       | CCGGAGTA     | CTTCAGAA     | CTGCT-----   | GACATCGAG   | CTTGCTAC      | ----AAGGGACTTTCCGC        |                 |                 |           |
| SARS-CoV-2 NC_045512.2 | (13172) | GGTA-CTGG    | TCAAGGCA       | AT-AA        | CAGTTACACCGGAAGCC | ATA          | TGG-ATC-A    | AGAA         | TCCTTTG     | TGGTGCAT      | CGTGTGTCTGTACTGCCGTTGCCAC |                 |                 |           |
|                        |         |              |                |              |                   |              |              |              |             |               |                           | Section 138     |                 |           |
|                        | (13290) | 13290        | 13300          | 13310        | 13320             | 13330        | 13340        | 13350        | 13360       | 13370         | 13386                     |                 |                 |           |
| HIV-1 HXB2             | (362)   | TGGG         | GACTT          | TCCAG-----GG | AAGC              | GTGGCC       | TGGCGGG      | ACTGGG       | GAGTGGCG    | AGCCCTC       | AGATCCTGCATAT             | AAGCAGCTGCTTTTG | CCTGT---        |           |
| SARS-CoV-2 NC_045512.2 | (13265) | -ATA         | GATCA          | TCCA         | AATCCTAA          | A---G        | ATTTTGT      | TGACTTA      | AAAAGG---   | TAAAGTATGTACA | ATACTTA---CA              | ACTTGCTAA       | TGACCTGTGGG     |           |
|                        |         |              |                |              |                   |              |              |              |             |               |                           | Section 139     |                 |           |
|                        | (13387) | 13387        | 13400          | 13410        | 13420             | 13430        | 13440        | 13450        | 13460       | 13470         | 13483                     |                 |                 |           |
| HIV-1 HXB2             | (451)   | -----ACT     | GGGTCT         | CTCTG        | GTAGAC            | CAGATCTGA    | GCC          | TGGGA--GCT   | CTCTGGCTAA  | CTAGGG        | AACCACTGCTTA              | AGCC            | TCAATAAAGCTTGC  |           |
| SARS-CoV-2 NC_045512.2 | (13351) | TTTTAC       | ACTTAAAAA      | CA-CA        | GTCTGTAC          | CGTCTGCG     | GTATGT       | TGGAAAGG     | TATGCTGT    | AGTTGTG-AT    | CAACTCCGCG                | AACCCATGCTTCAG  | T               |           |
|                        |         |              |                |              |                   |              |              |              |             |               |                           | Section 140     |                 |           |
|                        | (13484) | 13484        | 13490          | 13500        | 13510             | 13520        | 13530        | 13540        | 13550       | 13560         | 13570                     | 13580           |                 |           |
| HIV-1 HXB2             | (539)   | CTTGAG       | TGCTTCA        | AGTAGTGT     | GTG               | CCCGTCTG     | TTGTGT       | GACTCTGG     | TAAC        | TAGAGAT       | CCCTCAG                   | ACCCTTTT        | AGTCAGTG-----TG | GAA-----A |
| SARS-CoV-2 NC_045512.2 | (13446) | CTG--A       | TGCACA         | ATCGTT       | TTTAAAC           | GGGT         | TGCGGTGT     | AGTGCAG      | CCCGTCTTACA | CCGTGC        | GGCACAGGC                 | ACT-AGT-ACTGA   | TGTCGTATACAG    |           |

SARS-CoV-2 & HIV-1.apr

|                        |         |                     |                  |              |             |            |           |                 |            |             |              |           |         |           |                |           |           |             |      |
|------------------------|---------|---------------------|------------------|--------------|-------------|------------|-----------|-----------------|------------|-------------|--------------|-----------|---------|-----------|----------------|-----------|-----------|-------------|------|
|                        |         | Section 141         |                  |              |             |            |           |                 |            |             |              |           |         |           |                |           |           |             |      |
|                        | (13581) | 13581               | 13590            | 13600        | 13610       | 13620      | 13630     | 13640           | 13650      | 13660       | 13677        |           |         |           |                |           |           |             |      |
| HIV-1 HXB2             | (625)   | ATCTCTAGCAGTGGCGCCC | GAACAGGGACCTGAAA | CGAAAGGGAAAC | CAGAGGAGC   | --TCTCTC   | GACGCG    | AGGACTCGGCTT    | GCTGAAG    | --CG        | CGCA         |           |         |           |                |           |           |             |      |
| SARS-CoV-2 NC_045512.2 | (13539) | GGCTTTTGACATCTACAAT | GATAAAGTAGCT     | --GTTTGTCTAA | TTCTCTAA    | TAACAC     | TAATGTTGT | CGCTTCCAAGAAAAG | GACGAAG    | ATGA        | CAAT         |           |         |           |                |           |           |             |      |
|                        |         | Section 142         |                  |              |             |            |           |                 |            |             |              |           |         |           |                |           |           |             |      |
|                        | (13678) | 13678               | 13690            | 13700        | 13710       | 13720      | 13730     | 13740           | 13750      | 13760       | 13774        |           |         |           |                |           |           |             |      |
| HIV-1 HXB2             | (718)   | CGGCAA              | GAGGCGAGGGGGC    | GCGGA-CT     | GTGAGTACGC  | -----CA    | AAAATTTT  | TGACTAGCGG      | AGGCTAGAA  | --GGAG      | AGAGATGGGTGC | G-AGAG    |         |           |                |           |           |             |      |
| SARS-CoV-2 NC_045512.2 | (13633) | TTAATT              | GATTCTTACTTT     | GTAGTTAA     | GAGACACAC   | AC         | TTTCTCTAA | CTACCAACA       | TGAAGAAACA | ATTTATA     | ATTTACTTAAG  | GATTGTCCA | GCTGTT  |           |                |           |           |             |      |
|                        |         | Section 143         |                  |              |             |            |           |                 |            |             |              |           |         |           |                |           |           |             |      |
|                        | (13775) | 13775               | 13780            | 13790        | 13800       | 13810      | 13820     | 13830           | 13840      | 13850       | 13860        | 13871     |         |           |                |           |           |             |      |
| HIV-1 HXB2             | (803)   | CGTCAGT             | ATTAAAGCGGGGG    | AGAA         | TAGATCGA    | -TG        | GGAAA     | AAATTCGGTT      | AAGGCC     | AGGGGGAAAGA | AAAAATA      | TAAATT    | AAAACAT | ATAGTAT   | GGG            |           |           |             |      |
| SARS-CoV-2 NC_045512.2 | (13729) | GC                  | TAAACATG         | ACTTCTTTA    | AGTT        | TAGA       | ATAGAC    | --GGTGAC        | ATG-GTACC  | AC--AT      | AATATCACGT   | -CAA      | CGTCTTA | CTAAAT    | ACACAATGGCAGAC |           |           |             |      |
|                        |         | Section 144         |                  |              |             |            |           |                 |            |             |              |           |         |           |                |           |           |             |      |
|                        | (13872) | 13872               | 13880            | 13890        | 13900       | 13910      | 13920     | 13930           | 13940      | 13950       | 13968        |           |         |           |                |           |           |             |      |
| HIV-1 HXB2             | (899)   | CAAGC               | CAGGGA           | GCTAGAA      | C           | GATTCGCAGT | -----TAAT | CCTGGG          | CTGT       | TTAGAA      | ACATC        | AGAAGG    | CT      | -----GTAG | ACAAAT         | TACTGGG   | AC        |             |      |
| SARS-CoV-2 NC_045512.2 | (13819) | CTC                 | G-TCTAT          | GCTTT        | AAAGCA      | TTTGAT     | GAAGG     | TAAT            | TGTGAC     | ACAT        | TTA          | AAAGAA    | AT      | ACTTGT    | CACATACA       | ATTGTTGT  | GATGATGAT | TATT-TCA    |      |
|                        |         | Section 145         |                  |              |             |            |           |                 |            |             |              |           |         |           |                |           |           |             |      |
|                        | (13969) | 13969               | 13980            | 13990        | 14000       | 14010      | 14020     | 14030           | 14040      | 14050       | 14065        |           |         |           |                |           |           |             |      |
| HIV-1 HXB2             | (977)   | -AGCT               | ACAAC            | CATCCCT      | T           | CAGACAG    | GATCA     | GAAGAA          | CTTAGAT    | CATTT       | ATATAATACA   | G         | TAGCAAC | CTCTA     | TTGTGTGCAT     | -----CAA  | AGGAT     | T           |      |
| SARS-CoV-2 NC_045512.2 | (13914) | T                   | AAAA             | AGGAC        | TGG--TA     | TGATTTT    | GTAGAAA   | --CC            | CAGATAT    | ATT-A       | -----CG      | GTATAC    | GCAAC   | TTAG      | GTGAAC         | CGTGTACGC | CAA       | GCTTT       |      |
|                        |         | Section 146         |                  |              |             |            |           |                 |            |             |              |           |         |           |                |           |           |             |      |
|                        | (14066) | 14066               | 14080            | 14090        | 14100       | 14110      | 14120     | 14130           | 14140      | 14150       | 14162        |           |         |           |                |           |           |             |      |
| HIV-1 HXB2             | (1065)  | AGA                 | GATAAAA          | GACACCA      | AGGAAGCTTTA | GAC        | AG-ATA    | GAGGAA          | ----G      | -----A      | GCAAA        | ACAAA     | AGTA    | AGAAAA    | AAGCACAGCA     | --AGCA    | GCA       | G           |      |
| SARS-CoV-2 NC_045512.2 | (13998) | ---                 | GT               | TAAAA        | ACAGTAC     | AATT       | -----CT   | GTGAT           | GCCATG     | CGAAA       | TGCTG        | GTATTGTT  | G       | TGTAC     | TGACAT         | TTAGATAA  | --TCA     | AGATCTCAATG | GTAA |
|                        |         | Section 147         |                  |              |             |            |           |                 |            |             |              |           |         |           |                |           |           |             |      |
|                        | (14163) | 14163               | 14170            | 14180        | 14190       | 14200      | 14210     | 14220           | 14230      | 14240       | 14259        |           |         |           |                |           |           |             |      |
| HIV-1 HXB2             | (1148)  | CTG                 | ACAC             | -----AGGA    | CACAG       | ----CAAT   | CAGGTCAG  | CCAAAAT         | TACCC      | TATAG       | -TG          | CAGAACAT  | CAGGG   | GGCAAATGG | TACAT          | CAGGC     | CAT       |             |      |
| SARS-CoV-2 NC_045512.2 | (14085) | CTG                 | GTAT             | GATTTTCGGTG  | ATTT        | CATACAAAC  | CACGC     | CAGGTAG         | TGGA       | AGTTCCTGT   | TGTAG        | ATTCTT    | ATTATT  | CATTGTT   | AA             | TGCC      | TA--TATTA | ACCT        |      |

SARS-CoV-2 & HIV-1.apr

|                        |         |           |          |         |                  |                 |           |         |           |             |            |           |          |            |        |          |               |               |             |               |              |
|------------------------|---------|-----------|----------|---------|------------------|-----------------|-----------|---------|-----------|-------------|------------|-----------|----------|------------|--------|----------|---------------|---------------|-------------|---------------|--------------|
|                        |         |           |          |         |                  |                 |           |         |           | Section 148 |            |           |          |            |        |          |               |               |             |               |              |
|                        | (14260) | 14260     | 14270    | 14280   | 14290            | 14300           | 14310     | 14320   | 14330     | 14340       | 14356      |           |          |            |        |          |               |               |             |               |              |
| HIV-1 HXB2             | (1230)  | ATCAC     | CTAGAA   | CTTTAA  | TGCAT            | GGTAA           | AGTAG     | TAGAA   | GAGAGG    | CTTTC       | AGC        | CCAG      | AAGTGA   | TATACCCATG | TTTTC  | AGCAT    | TATCAG        | --            | AAGGAG      |               |              |
| SARS-CoV-2 NC_045512.2 | (14180) | --TGA     | CCAGGG   | CTTTAA  | TGCA             | GAGTCA          | CA        | TGT     | TGACA     | CTGACTT     | -AACAA     | AGCC      | TTACATTA | AGTGGGAT   | TTGT   | TAAAT    | ATGACTTC      | AC            | GGA         |               |              |
|                        |         |           |          |         |                  |                 |           |         |           | Section 149 |            |           |          |            |        |          |               |               |             |               |              |
|                        | (14357) | 14357     | 14370    | 14380   | 14390            | 14400           | 14410     | 14420   | 14430     | 14440       | 14453      |           |          |            |        |          |               |               |             |               |              |
| HIV-1 HXB2             | (1325)  | CC--ACCCC | ACAAGA   | TTTAA   | CAACCAT          | GC              | TAAACACAG | TGGGG   | GGGACATCA | AGCAG       | CCATG      | CAAA      | TGTTAA   | AAAGAGACC  | ATCAAT | G-AGGA   | AGCT          | GC            |             |               |              |
| SARS-CoV-2 NC_045512.2 | (14272) | GAGAGGTTA | AAACTC   | TTTGAC  | CGTTAT           | TTT--           | AAATAT    | TGGGATC | AGACAT    | ACCA        | CC--AAATTG | TGTTAA    | CTGTTTGG | ATGACA     | GATG   | CA       | TTCT--        |               |             |               |              |
|                        |         |           |          |         |                  |                 |           |         |           | Section 150 |            |           |          |            |        |          |               |               |             |               |              |
|                        | (14454) | 14454     | 14460    | 14470   | 14480            | 14490           | 14500     | 14510   | 14520     | 14530       | 14540      | 14550     |          |            |        |          |               |               |             |               |              |
| HIV-1 HXB2             | (1419)  | AGAA      | TGGGAT   | AGAG    | TGCAT            | CC-----         | AGTGCAT   | TGCAGGG | C--CTAT   | TGCACC      | AGGC       | CAGA      | TGAGAG   | AA         | CC     | AAGGGGAA | GTGACATAGCAGG |               |             |               |              |
| SARS-CoV-2 NC_045512.2 | (14364) | GCAT      | TGTGCA   | AACT    | TTAAT            | GTTTTATTCTCTACA | -GTGT     | TGCCAC  | CTACA     | AGTT        | TTTGG      | ACCA      | CTAG     | TGAGA      | AA     | ATAT---  | TTGT          | TGATGGTGTTT   |             |               |              |
|                        |         |           |          |         |                  |                 |           |         |           | Section 151 |            |           |          |            |        |          |               |               |             |               |              |
|                        | (14551) | 14551     | 14560    | 14570   | 14580            | 14590           | 14600     | 14610   | 14620     | 14630       | 14647      |           |          |            |        |          |               |               |             |               |              |
| HIV-1 HXB2             | (1503)  | A         | ACTAC    | TAGTA   | CCC              | TT              | CAGGAACA  | AATAGGA | TGGAT     | GAC         | AAAT       | ATCCACC   | TATCCC   | AGT        | AGGA   | GAAATTTA | TAAAGAT       | GGATA         | ATCCT       | GGGATT        |              |
| SARS-CoV-2 NC_045512.2 | (14456) | CA        | ---      | TTGTA   | G--              | TT              | TCAACTGG  | A       | TACCAC    | TTC         | A-GAG      | AGC       | TAGGT    | GTTG       | TACATA | ATC      | AGGA          | TGTAA         | AACT        | TAC--ATAGCTCT | AGACT--TAGT- |
|                        |         |           |          |         |                  |                 |           |         |           | Section 152 |            |           |          |            |        |          |               |               |             |               |              |
|                        | (14648) | 14648     | 14660    | 14670   | 14680            | 14690           | 14700     | 14710   | 14720     | 14730       | 14744      |           |          |            |        |          |               |               |             |               |              |
| HIV-1 HXB2             | (1600)  | AA        | TAA      | AATAG   | TAAGAA           | TGTATA          | GCCCTAC   | CAGCA   | TTCT      | GGACAT      | AAGACAA    | G         | GAC      | CAAA       | GGAAC  | CCTTTA   | GAGACT        | TGTAGAC       | CGGT----    | TCTAT         |              |
| SARS-CoV-2 NC_045512.2 | (14542) | TT        | TAA      | GGAAT   | TA--             | CT              | TGTGTA    | T-GCT   | GT--      | GACC        | CT-GCT     | ATGCACGCT | GCTT     | CTG-GT     | AACT   | CTATTA   | CTAGA         | TAAACGC       | ACTACGTGCT  | TTTCA         |              |
|                        |         |           |          |         |                  |                 |           |         |           | Section 153 |            |           |          |            |        |          |               |               |             |               |              |
|                        | (14745) | 14745     | 14750    | 14760   | 14770            | 14780           | 14790     | 14800   | 14810     | 14820       | 14830      | 14841     |          |            |        |          |               |               |             |               |              |
| HIV-1 HXB2             | (1693)  | AA        | AACT     | CTAAGAG | CCGAGCA          | AGCTTCA         | -CAGGA    | GGTAAA  | AAA       | TTGATGA     | CAGAAACCT  | TGTT      | GGTCC    | AAA        | TGCG   | AACC     | CAGATTG       | TAAGACTATT    |             |               |              |
| SARS-CoV-2 NC_045512.2 | (14632) | GT        | AGCT     | GCACTTA | CTACA            | ATGTG           | TTTTCA    | AAC     | TGTC      | AAA         | CCC        | GGTAA     | -----    | TTTT       | AACAA  | AGACTT   | CTATGACT--    | TTGCTGTGTCT-- |             |               |              |
|                        |         |           |          |         |                  |                 |           |         |           | Section 154 |            |           |          |            |        |          |               |               |             |               |              |
|                        | (14842) | 14842     | 14850    | 14860   | 14870            | 14880           | 14890     | 14900   | 14910     | 14920       | 14938      |           |          |            |        |          |               |               |             |               |              |
| HIV-1 HXB2             | (1789)  | TT        | AAAAGCAT | TGGG    | ACCAGCGGCTACACTA | GAAG            | AAA       | TGATGA  | CAGCATG   | T           | CAGGG      | AGT       | AGGAGG   | ACCC       | GGC    | CATA     | AGGCAAGAG     | GT            | TTTGGCTGAAG |               |              |
| SARS-CoV-2 NC_045512.2 | (14716) | -AA       | GGGTTTC  | TTTA    | -----            | GGAAG           | GAAG      | TTC     | TGT       | TGA         | AT----     | TAA       | AAC      | ACTTCTTC-- | TTTGCT | CAGGAT   | GGAAT         | GCT           | GCATCAGC    | G             |              |

## SARS-CoV-2 &amp; HIV-1.apr

|                        |         |             |             |              |        |        |           |         |                |        |                  |            |               |            |                |           |          |          |         |             |         |          |                |           |            |         |       |          |   |
|------------------------|---------|-------------|-------------|--------------|--------|--------|-----------|---------|----------------|--------|------------------|------------|---------------|------------|----------------|-----------|----------|----------|---------|-------------|---------|----------|----------------|-----------|------------|---------|-------|----------|---|
|                        |         | Section 155 |             |              |        |        |           |         |                |        |                  |            |               |            |                |           |          |          |         |             |         |          |                |           |            |         |       |          |   |
|                        |         | (14939)     | 14939       | 14950        | 14960  | 14970  | 14980     | 14990   | 15000          | 15010  | 15020            | 15035      |               |            |                |           |          |          |         |             |         |          |                |           |            |         |       |          |   |
| HIV-1 HXB2             | (1886)  |             | CAATGAG     | CCAA         | GTAA   | CAAA   | TTCA      | GTACCA  | TAA            | T--GA  | TGCAGAG          | AGGCAA--TT | TAGGAACCAAAGA | AAG--A     | TTGT           | TAAGT     | GT       | TTCA     | ATTGT   | GG          |         |          |                |           |            |         |       |          |   |
| SARS-CoV-2 NC_045512.2 | (14795) |             | ATTA-T      | GACT         | ACTAT  | CGTTAT | AAT       | CTACCA  | ACA            | AATGTG | TGATATC          | AGA        | CAA           | CTACT      | TATTTGTAGTT--G | AAGTTG    | TTGA     | TAAGT    | ACT     | TTTGATTGT   | TA      |          |                |           |            |         |       |          |   |
|                        |         | Section 156 |             |              |        |        |           |         |                |        |                  |            |               |            |                |           |          |          |         |             |         |          |                |           |            |         |       |          |   |
|                        |         | (15036)     | 15036       | 15050        | 15060  | 15070  | 15080     | 15090   | 15100          | 15110  | 15120            | 15132      |               |            |                |           |          |          |         |             |         |          |                |           |            |         |       |          |   |
| HIV-1 HXB2             | (1977)  |             | CAAAG--AAGG | GCAC         | AGCC   | AGAA   | AATTG     | CAGG    | GC             | CCCTAG | GAA              | AAAGGG     | CT            | GTTGGA     | AATGTGGAA      | AGGAA     | GG--ACAC | CAA      | TG      | AAAG        | AT      | TGTACT   | T              |           |            |         |       |          |   |
| SARS-CoV-2 NC_045512.2 | (14889) |             | GGATG       | GTGGCT       | GTATTA | ATGTGA | A----     | C       | CAAGT          | CA     | T--CG            | TC         | AA            | CAAC       | CT-----        | AGACAAATC | AG--CT   | GGT--TTT | CA      | ATT         | AA      | TAA      | ATG            | GGGT      |            |         |       |          |   |
|                        |         | Section 157 |             |              |        |        |           |         |                |        |                  |            |               |            |                |           |          |          |         |             |         |          |                |           |            |         |       |          |   |
|                        |         | (15133)     | 15133       | 15140        | 15150  | 15160  | 15170     | 15180   | 15190          | 15200  | 15210            | 15229      |               |            |                |           |          |          |         |             |         |          |                |           |            |         |       |          |   |
| HIV-1 HXB2             | (2071)  |             | GAGAGA      | CAGGCT       | AA     | TTT    | TTA       | GGG---- | AAGA           | TC     | TGGCCTTCTACAAGGG | AAG        | GCC--AGGGAAT  | TTT        | CCT            | CAG       | AGCAG    | AC-----  | CAGAG   | C           |         |          |                |           |            |         |       |          |   |
| SARS-CoV-2 NC_045512.2 | (14971) |             | AAG--G      | TA--G        | ACTTTA | TTA    | TG        | ATTCA   | AT             | GAG--T | TATGAGG-----     | ATC        | AAG           | ATGCA----- | C              | TTT       | TCG      | CAT      | ATACA   | AAACGTAATGT | CATCC   | C        |                |           |            |         |       |          |   |
|                        |         | Section 158 |             |              |        |        |           |         |                |        |                  |            |               |            |                |           |          |          |         |             |         |          |                |           |            |         |       |          |   |
|                        |         | (15230)     | 15230       | 15240        | 15250  | 15260  | 15270     | 15280   | 15290          | 15300  | 15310            | 15326      |               |            |                |           |          |          |         |             |         |          |                |           |            |         |       |          |   |
| HIV-1 HXB2             | (2153)  |             | CAACA       | GCCC--       | CAC    | CAGAAG | AGAGCT    | T       | CAGG           | CT     | TGGG             | TAGAGA     | CAA           | CA         | CT             | CCCC      | CTC      | AG       | AAGCAG  | GAGCCGATA   | G       | CAAGG    | AA             | CTGTA--TC | TTT        | TA      |       |          |   |
| SARS-CoV-2 NC_045512.2 | (15051) |             | TACTA       | TATA--A      | CT     | CA     | ATGA      | ATC---  | T              | TAAGT  | ATG              | CCAT       | T             | TAGTG      | CAA            | AGA       | AT       | TAGAG    | CTC     | GC          | ACCGTAG | GCT--GGT | GT             | CTC--T    | AT         | CTGTAGT | ACTAT |          |   |
|                        |         | Section 159 |             |              |        |        |           |         |                |        |                  |            |               |            |                |           |          |          |         |             |         |          |                |           |            |         |       |          |   |
|                        |         | (15327)     | 15327       | 15340        | 15350  | 15360  | 15370     | 15380   | 15390          | 15400  | 15410            | 15423      |               |            |                |           |          |          |         |             |         |          |                |           |            |         |       |          |   |
| HIV-1 HXB2             | (2248)  |             | ACT         | TTCCCTCAGG-- | T      | CAC    | TCTTTGGCA | ACG     | ACCCTCGTCACAAT | AA     | AGATAG           | GGGG       | GC            | ACTA       | AG             | GA        | AGCT     | CTAT     | TAG     | ATACAGGA    | G       | CAG      | TGATA          |           |            |         |       |          |   |
| SARS-CoV-2 NC_045512.2 | (15139) |             | AC          | CAATAGACAG   | TT     | TCAT   | A         | -----   | C              | AAAA   | TTATT----        | G          | AA            | TC         | ATA            | G         | CC       | GC--     | ACTAG   | AG--GAGCT   | AC--TGT | A-----   | G              | T         | AAT        | TGGA    |       |          |   |
|                        |         | Section 160 |             |              |        |        |           |         |                |        |                  |            |               |            |                |           |          |          |         |             |         |          |                |           |            |         |       |          |   |
|                        |         | (15424)     | 15424       | 15430        | 15440  | 15450  | 15460     | 15470   | 15480          | 15490  | 15500            | 15520      |               |            |                |           |          |          |         |             |         |          |                |           |            |         |       |          |   |
| HIV-1 HXB2             | (2344)  |             | CAG         | TATTA        | GAAGA  | AATGA  | GTT       | TGC--   | CAGG           | AAG    | ATGG             | AAAC       | CAAAAATGA     | TAGG       | GGGA           | AT        | TG       | GAGG     | TTTTATC | AAAG        | TAAG    | GACAG    | TAT            | GAT       | CAGAT--    |         |       |          |   |
| SARS-CoV-2 NC_045512.2 | (15212) |             | C           | AGCAA        | TTCTA  | TGGTG  | GTT       | GGC     | ACA            | AC     | ATGT             | TAA        | AAAC          | TGTT----   | T              | ATAGT     | GATG     | TAGA     | AAACCC  | TC--ACCT    | TAT     | G        | GGT--T         | TGG       | GAT        | TAT     | CCTA  |          |   |
|                        |         | Section 161 |             |              |        |        |           |         |                |        |                  |            |               |            |                |           |          |          |         |             |         |          |                |           |            |         |       |          |   |
|                        |         | (15521)     | 15521       | 15530        | 15540  | 15550  | 15560     | 15570   | 15580          | 15590  | 15600            | 15617      |               |            |                |           |          |          |         |             |         |          |                |           |            |         |       |          |   |
| HIV-1 HXB2             | (2438)  |             | ACT         | CATAG        | GA     | AAT    | CTGTG     | GACATA  | A--G           | GCT    | ATAGG            | TACAG      | TAT           | T          | AGTAGG         | ACCTACA   | C        | CT       | GTC     | AACATA      | AATTG   | G        | AAGAAATCTGTTGA | CT        | CAGATTGG   |         |       |          |   |
| SARS-CoV-2 NC_045512.2 | (15302) |             | AAT         | GTGAT        | AGAGG  | CATG   | CCTA      | ACA     | AT--G          | GCT    | TAGAA            | T          | TAT           | G          | GCCT--         | CAC       | TTGTTCTT | GC       | CTC     | G           | CA      | AACATA   | CAAC           | G         | TGTTGT---- | A--G    | CT    | TGTC---- | A |

SARS-CoV-2 & HIV-1.apr

|                        |         |             |       |       |         |       |       |       |       |       |       |       |       |      |     |      |      |      |      |      |      |      |      |        |      |      |       |         |       |      |       |       |      |        |      |        |      |    |      |    |
|------------------------|---------|-------------|-------|-------|---------|-------|-------|-------|-------|-------|-------|-------|-------|------|-----|------|------|------|------|------|------|------|------|--------|------|------|-------|---------|-------|------|-------|-------|------|--------|------|--------|------|----|------|----|
|                        |         | Section 162 |       |       |         |       |       |       |       |       |       |       |       |      |     |      |      |      |      |      |      |      |      |        |      |      |       |         |       |      |       |       |      |        |      |        |      |    |      |    |
|                        |         | (15618)     | 15618 | 15630 | 15640   | 15650 | 15660 | 15670 | 15680 | 15690 | 15700 | 15714 |       |      |     |      |      |      |      |      |      |      |      |        |      |      |       |         |       |      |       |       |      |        |      |        |      |    |      |    |
| HIV-1 HXB2             | (2534)  | TTG         | CAC   | TTT   | AA--TTT | TC    | CA    | TTAG  | CCCC  | TAT   | TG-AG | ACT   | GT    | ACC  | AGT | AAAA | TT   | AA   | AGCC | AG   | GAAT | GT   | GG   | CCCA   | AAAG | TT   | AAA   | CA      | ATG   | GCC  | ATTG  |       |      |        |      |        |      |    |      |    |
| SARS-CoV-2 NC_045512.2 | (15388) | CAC         | CGT   | TTT   | CTA     | TAGA  | TT    | AG    | CTAA  | T     | GAG   | TG    | TGCT  | CA   | AG  | TAT  | TG   | AG   | TGAA | ATGG | TCA  | TGT  | TGTG | GCG--- | GT   | TCA  | CTAT  | ATGT    | TAA   | CA   | AGGT  | GGA   | ACCT |        |      |        |      |    |      |    |
|                        |         | Section 163 |       |       |         |       |       |       |       |       |       |       |       |      |     |      |      |      |      |      |      |      |      |        |      |      |       |         |       |      |       |       |      |        |      |        |      |    |      |    |
|                        |         | (15715)     | 15715 | 15720 | 15730   | 15740 | 15750 | 15760 | 15770 | 15780 | 15790 | 15800 | 15811 |      |     |      |      |      |      |      |      |      |      |        |      |      |       |         |       |      |       |       |      |        |      |        |      |    |      |    |
| HIV-1 HXB2             | (7628)  | ACAG        | AA    | GAA   | AAA     | AT    | AAA   | GCAT  | TA--- | G     | TAG   | AA    | ATT   | T    | -GT | AC   | AG   | AG   | AT   | GG   | AA   | AAG  | GA   | AGGG   | AAA  | ATTT | CAA   | AAAA    | T     | TGGG | CT    | GAAA  | ATC  | CATACA | AT   |        |      |    |      |    |
| SARS-CoV-2 NC_045512.2 | (15482) | CATC        | AG    | GAG   | ATGCC   | AC    | AA    | CTGC  | T     | TAT   | GC    | TA    | AT    | AG   | T   | GT   | TTT  | -T   | AA   | CA   | AT   | TT   | GC   | AAG    | CTG  | -TC  | ACG-- | GC      | CAA   | TGT  | T     | -AATG | C    | ACTTTT | TAT  | CTACTG | AT   |    |      |    |
|                        |         | Section 164 |       |       |         |       |       |       |       |       |       |       |       |      |     |      |      |      |      |      |      |      |      |        |      |      |       |         |       |      |       |       |      |        |      |        |      |    |      |    |
|                        |         | (15812)     | 15812 | 15820 | 15830   | 15840 | 15850 | 15860 | 15870 | 15880 | 15890 | 15908 |       |      |     |      |      |      |      |      |      |      |      |        |      |      |       |         |       |      |       |       |      |        |      |        |      |    |      |    |
| HIV-1 HXB2             | (2721)  | AC          | TCC   | AGT   | AT      | TTG   | CC    | ATA   | AAG   | AA    | AAAA  | AGA   | CAG   | T    | ACT | AA   | TGG  | AGA  | AAA  | TTAG | TAG  | AT   | TT   | TC-    | AG   | AGA  | AC    | TTA     | AT    | AAG  | AGA   | ACT   | CA   | AGAC   | TT   | CTG    | GGAA |    |      |    |
| SARS-CoV-2 NC_045512.2 | (15574) | GG          | TA    | ACAA  | AA      | TTG   | CC    | GAT   | AAG   | TA    | TGT   | CCG   | CA    | AT   | TT  | TAC  | AA   | CAC  | AGA  | CTT  | TAT  | GAG  | TG   | TC     | TC   | AT   | AG    | AA      | TAG   | AG   | AT    | GT    | TG   | AC     | CA   | GACT   | TT   | TG | AA   | TG |
|                        |         | Section 165 |       |       |         |       |       |       |       |       |       |       |       |      |     |      |      |      |      |      |      |      |      |        |      |      |       |         |       |      |       |       |      |        |      |        |      |    |      |    |
|                        |         | (15909)     | 15909 | 15920 | 15930   | 15940 | 15950 | 15960 | 15970 | 15980 | 15990 | 16005 |       |      |     |      |      |      |      |      |      |      |      |        |      |      |       |         |       |      |       |       |      |        |      |        |      |    |      |    |
| HIV-1 HXB2             | (7817)  | GT          | TCA   | ATT   | AGGA    | AT    | ACC   | ACATC | ----- | C     | GG    | CA    | GG    | GT   | TA  | AA   | AAG  | AAAA | AA   | ATCA | G    | TAAC | -    | AG     | TAC  | TG   | -GAT  | GT      | GGG   | TGA  | ----- | TGC   | ATAT | TT     | TTTC |        |      |    |      |    |
| SARS-CoV-2 NC_045512.2 | (15671) | AG          | TTTT  | TAC   | GCAT    | AT    | TTG   | CGTAA | CATTT | CT    | CA    | AT    | GAT   | GAT  | ACT | CTCT | GA   | ACG  | AT   | GCT  | GTT  | TGT  | GT   | GT     | TT   | CA   | AT    | AG      | CAC   | TTA  | TGC   | ATC   | TCA  | AGG    | T    | CTAGT  |      |    |      |    |
|                        |         | Section 166 |       |       |         |       |       |       |       |       |       |       |       |      |     |      |      |      |      |      |      |      |      |        |      |      |       |         |       |      |       |       |      |        |      |        |      |    |      |    |
|                        |         | (16006)     | 16006 | 16020 | 16030   | 16040 | 16050 | 16060 | 16070 | 16080 | 16090 | 16102 |       |      |     |      |      |      |      |      |      |      |      |        |      |      |       |         |       |      |       |       |      |        |      |        |      |    |      |    |
| HIV-1 HXB2             | (2900)  | AG          | T     | CC    | CT      | TAG   | AT    | GA    | AG    | AC    | TT    | CAG   | GA    | AGT  | AT  | ACT  | GCAT | TT   | -T   | ACC  | AT   | ACCT | AG   | TA     | TA   | AA   | CAAT  | GA      | AG    | AC   | ACC   | AGGG  | AT   | TAG    | ATAT | CAGTAC | AATG | TG | CT   |    |
| SARS-CoV-2 NC_045512.2 | (15768) | GG          | C     | TAG   | CA      | TA    | A     | AGAA  | --CT  | TT    | A     | AG    | TC    | AGT  | -T  | CT   | TTAT | TAT  | CA   | AA   | CA   | ATG  | TT   | TA     | TGT  | CTGA | AG    | CA-AA-- | ATG   | TTG  | GA    | CTG   | AG   | ACTG   | ACCT | TACT   |      |    |      |    |
|                        |         | Section 167 |       |       |         |       |       |       |       |       |       |       |       |      |     |      |      |      |      |      |      |      |      |        |      |      |       |         |       |      |       |       |      |        |      |        |      |    |      |    |
|                        |         | (16103)     | 16103 | 16110 | 16120   | 16130 | 16140 | 16150 | 16160 | 16170 | 16180 | 16199 |       |      |     |      |      |      |      |      |      |      |      |        |      |      |       |         |       |      |       |       |      |        |      |        |      |    |      |    |
| HIV-1 HXB2             | (2996)  | TCC         | AC    | AGGG  | ATG     | GAA   | AG--  | GAT   | CAC   | CA    | -GC   | AAT   | AT    | T    | C   | AA   | AGT  | AG   | CA   | T    | GACA | AAA  | AT   | -CT    | T    | AG   | AG    | CTTT    | TTAG  | AAA  | CA    | AAAT  | CC   | AGAC   | AT   | AGT    | TAT  |    |      |    |
| SARS-CoV-2 NC_045512.2 | (15859) | AA          | AGG   | ACCT  | CAT     | GAA   | TTTT  | GC    | TC    | T     | CA    | CAT   | CA    | AAT  | GT  | TAG  | TTA  | AA   | CA   | AG   | GGT  | GAT  | GAT  | TAT    | TGT  | GTA  | CC    | TT      | --    | C    | TT    | AC    | CA   | ATCC   | AT   | CA     | AG   | AT | CC-- |    |
|                        |         | Section 168 |       |       |         |       |       |       |       |       |       |       |       |      |     |      |      |      |      |      |      |      |      |        |      |      |       |         |       |      |       |       |      |        |      |        |      |    |      |    |
|                        |         | (16200)     | 16200 | 16210 | 16220   | 16230 | 16240 | 16250 | 16260 | 16270 | 16280 | 16296 |       |      |     |      |      |      |      |      |      |      |      |        |      |      |       |         |       |      |       |       |      |        |      |        |      |    |      |    |
| HIV-1 HXB2             | (3089)  | CTA         | T     | CAATA | CA---   | TG    | ----  | GAT   | GAT   | TTG   | TAT   | G--   | T     | AGGA | TCT | GACT | TAG  | AAA  | TAG  | GG   | GCA  | G    | CATA | GAA    | CA   | AAAA | TAG   | AG      | GAG   | CT   | GAGA  | CA    | ACAT | CTG    |      |        |      |    |      |    |
| SARS-CoV-2 NC_045512.2 | (15953) | ---         | T     | AGGGG | C       | GGGC  | TG    | TTTT  | GTA   | GAT   | -GA   | TAT   | CGTA  | AAA  | AC  | AGAT | GG   | TAC  | ACT  | TAT  | GATT | GAA  | CGG  | TTC    | GTG  | TCT  | TTT   | AG      | CTATA | GAT  | G     | CTT   | ACC  | CAC    |      |        |      |    |      |    |



SARS-CoV-2 & HIV-1.apr

|                        |         |                   |                  |         |             |             |                  |               |           |          |                |                |           |         |         |          |         |      |      |       |     |
|------------------------|---------|-------------------|------------------|---------|-------------|-------------|------------------|---------------|-----------|----------|----------------|----------------|-----------|---------|---------|----------|---------|------|------|-------|-----|
|                        |         | Section 169       |                  |         |             |             |                  |               |           |          |                |                |           |         |         |          |         |      |      |       |     |
|                        | (16297) | 16297             | 16310            | 16320   | 16330       | 16340       | 16350            | 16360         | 16370     | 16380    | 16393          |                |           |         |         |          |         |      |      |       |     |
| HIV-1 HXB2             | (3177)  | TTGAGG            | TG-GGGACTTACCACA | CCAGA   | CAAAA       | AAACAT      | CAGA             | AAGAAC        | CTCCAT    | TCCTT    | TGGAT          | GGG-TTATG      | AACTC     | CATC    | --CT    | GATAA    | AT      | GGAC |      |       |     |
| SARS-CoV-2 NC_045512.2 | (16046) | TTA--C            | TAAAC-----A-TC   | CTAAT   | CAGGA       | GTATG       | CTGA             | TGCTTT        | CATTG     | TACTT    | ACAAT          | ACATAAGAA      | AGCTA     | CATG    | ATGA    | GT       | TAA     | CA   | GGAC |       |     |
|                        |         | Section 170       |                  |         |             |             |                  |               |           |          |                |                |           |         |         |          |         |      |      |       |     |
|                        | (16394) | 16394             | 16400            | 16410   | 16420       | 16430       | 16440            | 16450         | 16460     | 16470    | 16480          | 16490          |           |         |         |          |         |      |      |       |     |
| HIV-1 HXB2             | (3269)  | AGTACAGCCTATAGTGC | TGCCAGAAA        | AAGACAG | CTGGACTGTCA | ATGACAT     | TACAG            | AAGT          | TAGTGGG   | GAAAT    | TG--AAT        | TG-GGC         | AGTC      | AGATTTA |         |          |         |      |      |       |     |
| SARS-CoV-2 NC_045512.2 | (16133) | ACATGTTAGAC---    | ATGTATTCTGTT     | ATGCTTA | CTAAT---    | GATAAC      | ACTTCA           | AGG---        | TAT       | TGGGA    | ACCTG          | AGTTTTA        | TGAGGC    | TATGT   | ACACACC |          |         |      |      |       |     |
|                        |         | Section 171       |                  |         |             |             |                  |               |           |          |                |                |           |         |         |          |         |      |      |       |     |
|                        | (16491) | 16491             | 16500            | 16510   | 16520       | 16530       | 16540            | 16550         | 16560     | 16570    | 16587          |                |           |         |         |          |         |      |      |       |     |
| HIV-1 HXB2             | (3362)  | CCAGGGAT          | TAAAG---         | GTAAG   | GCAAT       | TATGT       | TAACT            | CCTTA         | AGAGG     | AACAAAG  | CAC            | TAACAG         | AGTAAT    | ACCACT  | AAACAG  | AAG      | CAG     | AGC  | TAGA |       |     |
| SARS-CoV-2 NC_045512.2 | (16221) | GATACAG           | TCTTACAGGC       | TGTT    | GGGGC       | TG-TGTT     | CTTTGCA          | AATCA         | CAGACTT   | CATT     | --AGA          | T---G          | TGGTG     | CTTG    | CATAC   | GTAG     | ---     | ACC  | ATTC |       |     |
|                        |         | Section 172       |                  |         |             |             |                  |               |           |          |                |                |           |         |         |          |         |      |      |       |     |
|                        | (16588) | 16588             | 16600            | 16610   | 16620       | 16630       | 16640            | 16650         | 16660     | 16670    | 16684          |                |           |         |         |          |         |      |      |       |     |
| HIV-1 HXB2             | (3455)  | ACTG              | GCAGAAA          | CAGAG   | ATTCTAA     | AAGAACCAGTA | CATGG            | AGTGT         | ATTAT     | GACCCATC | AAAAG          | ACTTAATAGCAGAA | AATAC     | CAGAG   | GCA-GGG | GCA      |         |      |      |       |     |
| SARS-CoV-2 NC_045512.2 | (16309) | TTAT              | GTTGTAAA         | TGCTGTT | ACGACC      | ATG-----TC  | ----ATATC        | AACAT         | CAC--AT   | AAATT    | AGTCTTGCTCTGTT | AATC           | CGTAT     | GTTT--- | GCA     |          |         |      |      |       |     |
|                        |         | Section 173       |                  |         |             |             |                  |               |           |          |                |                |           |         |         |          |         |      |      |       |     |
|                        | (16685) | 16685             | 16690            | 16700   | 16710       | 16720       | 16730            | 16740         | 16750     | 16760    | 16770          | 16781          |           |         |         |          |         |      |      |       |     |
| HIV-1 HXB2             | (3551)  | AGG-----          | CAAT             | TGACAT  | TCAAA       | TTTAT       | --CAAG           | A             | GCCATT    | TAA      | AAATCT         | CAAAAC         | AGGAA     | AATATG  | CAAGA   | ATG      | AGGGGTG | CCCA | CAC  | TAA   | TGA |
| SARS-CoV-2 NC_045512.2 | (16388) | A--TGCTC          | CAGGTT           | GTGAT   | TCACAGAT    | GTGACTCA    | ACTTTACT         | TAG--G-AGGT   | ATGAGCT   | ATTAT    | TGTA--AT       | CACATAAA       | CCACC     | CATT    | AGTT    |          |         |      |      |       |     |
|                        |         | Section 174       |                  |         |             |             |                  |               |           |          |                |                |           |         |         |          |         |      |      |       |     |
|                        | (16782) | 16782             | 16790            | 16800   | 16810       | 16820       | 16830            | 16840         | 16850     | 16860    | 16878          |                |           |         |         |          |         |      |      |       |     |
| HIV-1 HXB2             | (3641)  | TGTAA             | AAACAA           | TTAA    | CAGAG       | ---GC       | AGT              | GCAAAAAATAACC | ACAGAAA   | GCATA    | GTAA           | TATGG          | GGAAGA    | --CT    | CCTAAA  | TTTAA    | AC      | TGC  | CCAT | TAC-- |     |
| SARS-CoV-2 NC_045512.2 | (16478) | TTCC              | ATT--G           | TGTG    | CTAAT       | TGGACA      | AGTTTTTGGT--TTAT | ATAAAAA       | TACAT     | GTGT     | TGGTAG         | CGATAA         | TGTTAC    | TGAC    | TTTAA   | --TG     | CAAT    | TG   | CA   | T     |     |
|                        |         | Section 175       |                  |         |             |             |                  |               |           |          |                |                |           |         |         |          |         |      |      |       |     |
|                        | (16879) | 16879             | 16890            | 16900   | 16910       | 16920       | 16930            | 16940         | 16950     | 16960    | 16975          |                |           |         |         |          |         |      |      |       |     |
| HIV-1 HXB2             | (3730)  | -AAAAG            | GAAACATGGGA      | AAACA   | TGGTG       | GACAG       | AGTAT            | TGGCAA        | GCACC     | ---TG    | GATTCT         | -GAG           | TGGGAGTTT | GTTA    | ATA-C   | CCCTCCCT | TAGTG   | ---  |      |       |     |
| SARS-CoV-2 NC_045512.2 | (16567) | ACATGT            | GACTGGACAA       | AT-GC   | TGGTG       | ATTACAT     | TTTAG            | CTAA          | CACCTGTAC | TGAAGA   | CTCAAG         | CTTTTTCAG      | CAGAA     | ACGCT   | CAAAGC  | TAC      | TGAG    |      |      |       |     |

SARS-CoV-2 & HIV-1.apr

|                        |         |                |            |            |           |          |          |          |       |             |                 |          |             |          |        |         |            |         |         |             |        |         |         |        |      |     |      |     |     |       |      |     |      |       |
|------------------------|---------|----------------|------------|------------|-----------|----------|----------|----------|-------|-------------|-----------------|----------|-------------|----------|--------|---------|------------|---------|---------|-------------|--------|---------|---------|--------|------|-----|------|-----|-----|-------|------|-----|------|-------|
|                        |         |                |            |            |           |          |          |          |       | Section 176 |                 |          |             |          |        |         |            |         |         |             |        |         |         |        |      |     |      |     |     |       |      |     |      |       |
|                        | (16976) | 16976          | 16990      | 17000      | 17010     | 17020    | 17030    | 17040    | 17050 | 17060       | 17072           |          |             |          |        |         |            |         |         |             |        |         |         |        |      |     |      |     |     |       |      |     |      |       |
| HIV-1 HXB2             | (3819)  | AAATTATGGTACCA | GT TAG     | AGAAAGAACC | ATA       | GTA      | GGAGCA   | AGAA     | CTTCT | ATG--TAG    | ATGG---GGCAGCTA | ACAGGGAG | ACT         | AAAT     | TAG    | GAAA    |            |         |         |             |        |         |         |        |      |     |      |     |     |       |      |     |      |       |
| SARS-CoV-2 NC_045512.2 | (16663) | GAGACATTTAAAC  | GTCTT      | ATGGTATTG  | CTACT     | GTA      | CG-TGA   | AGTGT    | GTG   | TCTGAC      | AGAGA           | ATT      | TACATCTTTCA | TGGG     | AAGTT  | GGTA    | AA         | CC      | TAG     | AC--        |        |         |         |        |      |     |      |     |     |       |      |     |      |       |
|                        |         |                |            |            |           |          |          |          |       | Section 177 |                 |          |             |          |        |         |            |         |         |             |        |         |         |        |      |     |      |     |     |       |      |     |      |       |
|                        | (17073) | 17073          | 17080      | 17090      | 17100     | 17110    | 17120    | 17130    | 17140 | 17150       | 17169           |          |             |          |        |         |            |         |         |             |        |         |         |        |      |     |      |     |     |       |      |     |      |       |
| HIV-1 HXB2             | (3911)  | AGCAGG         | ATA---     | TGTTACT    | AATAGAG-- | GAGACAAA | AGT      | TGT      | CAC   | CCT         | AA              | C--TG    | ACA         | CA       | ACAAAT | CA      | GA         | AGACT   | GAGT    | TACA        | AG     | CAAT    | TT      | ATC    |      |     |      |     |     |       |      |     |      |       |
| SARS-CoV-2 NC_045512.2 | (16757) | --CA           | CCACTTAACC | GA---      | AA        | TAT      | TGTCCTTT | ACTGGTTA | TCG   | TGT         | AAC             | TAA      | AAA         | ACAGT    | AA     | AGT     | ACAAAT     | AG      | GA--    | GA--G--     | TACA-- | CCT--   | TT      | GAA    |      |     |      |     |     |       |      |     |      |       |
|                        |         |                |            |            |           |          |          |          |       | Section 178 |                 |          |             |          |        |         |            |         |         |             |        |         |         |        |      |     |      |     |     |       |      |     |      |       |
|                        | (17170) | 17170          | 17180      | 17190      | 17200     | 17210    | 17220    | 17230    | 17240 | 17250       | 17266           |          |             |          |        |         |            |         |         |             |        |         |         |        |      |     |      |     |     |       |      |     |      |       |
| HIV-1 HXB2             | (4000)  | TAGCT          | TTGC       | CAGGATTC   | GGGAT     | TAGAAGT  | AA       | CATA     | GTAA  | CAG         | CTCA            | CAATATGC | ATTAGGAA    | TCAT     | TC     | AGC     | ACA        | ACCAGAT | CA      | AAGT        | GA     | ATC     | AGA     |        |      |     |      |     |     |       |      |     |      |       |
| SARS-CoV-2 NC_045512.2 | (16840) | AAAGG          | TGAC       | -TATGGT    | GATGC     | TGTTGT   | TT       | AC       | GAG   | GT---       | ACA-ACA         | ACTTA    | CAAA        | ATTAA    | ATG    | TTGGT   | -GATT      | ATTTTGT | GCTG-   | ACAT        | CA     | AT      | ACA     |        |      |     |      |     |     |       |      |     |      |       |
|                        |         |                |            |            |           |          |          |          |       | Section 179 |                 |          |             |          |        |         |            |         |         |             |        |         |         |        |      |     |      |     |     |       |      |     |      |       |
|                        | (17267) | 17267          | 17280      | 17290      | 17300     | 17310    | 17320    | 17330    | 17340 | 17350       | 17363           |          |             |          |        |         |            |         |         |             |        |         |         |        |      |     |      |     |     |       |      |     |      |       |
| HIV-1 HXB2             | (4097)  | GTT            | AGTCA      | ATCA       | AA        | TAAT     | AG       | GCA      | G-TTA | ATA         | AAAAAGG         | AAAG     | GTCTAT      | CTG      | GCAT   | GGGT    | TACCAGC    | CACAC   | AAAGG   | AA          | TTGG   | AGGAA   | TGAA    | CAAGT  |      |     |      |     |     |       |      |     |      |       |
| SARS-CoV-2 NC_045512.2 | (16930) | GTA            | ATGC       | ----CAT    | TA--      | AGT      | GCA      | CC       | TAC   | ACTA        | -GTGCC          | ACAAG    | AGCAC       | TATG     | TTA    | GAAT    | T-----     | ACT     | GGC     | -TTAT       | ACCC   | AA      | CACT    | CAATA  |      |     |      |     |     |       |      |     |      |       |
|                        |         |                |            |            |           |          |          |          |       | Section 180 |                 |          |             |          |        |         |            |         |         |             |        |         |         |        |      |     |      |     |     |       |      |     |      |       |
|                        | (17364) | 17364          | 17370      | 17380      | 17390     | 17400    | 17410    | 17420    | 17430 | 17440       | 17450           | 17460    |             |          |        |         |            |         |         |             |        |         |         |        |      |     |      |     |     |       |      |     |      |       |
| HIV-1 HXB2             | (4193)  | AGAT           | AAATTAG    | TC         | AGT       | GCT      | GGA      | ATCA     | G     | AAAGT       | ACT             | ATTT     | TTAGAT      | GGA      | ATAG   | CA      | TAAGGCC    | CAAG    | ATG---- | ACAT        | GAGAA  | ATATCA  | CAGTAAT | T      |      |     |      |     |     |       |      |     |      |       |
| SARS-CoV-2 NC_045512.2 | (17009) | TCTC           | A--G--A    | TG         | AGT       | TTT      | TCT      | AGCA     | ATG   | T--TGCAA    | ATT             | ATCA     | -----       | AAG      | GT     | TGGTATG | CAA-       | AAG     | TATTCT  | ACA         | CTCC-- | AGGGAC  | CA      | CCTGGT |      |     |      |     |     |       |      |     |      |       |
|                        |         |                |            |            |           |          |          |          |       | Section 181 |                 |          |             |          |        |         |            |         |         |             |        |         |         |        |      |     |      |     |     |       |      |     |      |       |
|                        | (17461) | 17461          | 17470      | 17480      | 17490     | 17500    | 17510    | 17520    | 17530 | 17540       | 17557           |          |             |          |        |         |            |         |         |             |        |         |         |        |      |     |      |     |     |       |      |     |      |       |
| HIV-1 HXB2             | (4285)  | GGA            | GAGC       | AAT        | GG        | CTAG-    | TG       | ATT      | TTAA  | CCT         | GC              | CAC      | CTGTAG----  | TAGCAAAA | GAA    | ATAGT   | A-----     | GCCAG   | CT      | GTGATAAA    | ---    | TG      | TCAGCTA | A      |      |     |      |     |     |       |      |     |      |       |
| SARS-CoV-2 NC_045512.2 | (17092) | ACT            | GGTA       | AGAG       | GT        | CATTT    | TG       | CTA      | TTGG  | CCT         | AG              | CT       | TCTACTACCC  | TCTGCTC  | G-C    | ATAGT   | GTATACAGCT | TTGCT   | CT      | CATGCCGCTGT | TG     | ATGCACT | A       |        |      |     |      |     |     |       |      |     |      |       |
|                        |         |                |            |            |           |          |          |          |       | Section 182 |                 |          |             |          |        |         |            |         |         |             |        |         |         |        |      |     |      |     |     |       |      |     |      |       |
|                        | (17558) | 17558          | 17570      | 17580      | 17590     | 17600    | 17610    | 17620    | 17630 | 17640       | 17654           |          |             |          |        |         |            |         |         |             |        |         |         |        |      |     |      |     |     |       |      |     |      |       |
| HIV-1 HXB2             | (4366)  | AAG            | GAGAAG     | C          | CAT       | GC       | ATGGACA  | AGT      | TAG   | ACT         | G               | TAG      | TCCA--      | GGA      | ATA    | TGGCA   | CT--A      | GATT    | GT      | ACA         | CATT   | TAGA    | AG      | GAAA   | GTTA | TCC | TGGT | AG  | CAG |       |      |     |      |       |
| SARS-CoV-2 NC_045512.2 | (17188) | TGT            | GAGAAG     | G          | CAT       | T-       | AAAAAT   | A--      | TT    | GC          | CTA             | TAG      | ATA         | AA       | AT     | G       | TAG        | TA      | GAATT   | A           | TACCT  | G       | CAC     | GT     | GCT  | CGT | G    | TAG | AGT | GTTTT | GATA | AAT | TCAA | AGTGA |

SARS-CoV-2 & HIV-1.apr

|                        |         |       |       |       |       |       |       |       |       |       |       |             |     |     |   |   |   |   |   |     |   |
|------------------------|---------|-------|-------|-------|-------|-------|-------|-------|-------|-------|-------|-------------|-----|-----|---|---|---|---|---|-----|---|
|                        |         |       |       |       |       |       |       |       |       |       |       | Section 183 |     |     |   |   |   |   |   |     |   |
|                        | (17655) | 17655 | 17660 | 17670 | 17680 | 17690 | 17700 | 17710 | 17720 | 17730 | 17740 | 17751       |     |     |   |   |   |   |   |     |   |
| HIV-1 HXB2             | (4459)  | T     | T     | C     | A     | T     | G     | T     | A     | G     | C     | C           | A   | G   | T | G | G |   |   |     |   |
| SARS-CoV-2 NC_045512.2 | (17282) | A     | T     | T     | C     | A     | A     | C     | A     | T     | T     | A           | G   | --- | A | C | A | G | T | A   | T |
|                        |         |       |       |       |       |       |       |       |       |       |       | Section 184 |     |     |   |   |   |   |   |     |   |
|                        | (17752) | 17752 | 17760 | 17770 | 17780 | 17790 | 17800 | 17810 | 17820 | 17830 | 17848 |             |     |     |   |   |   |   |   |     |   |
| HIV-1 HXB2             | (4554)  | C     | C     | A     | G     | T     | A     | A     | A     | A     | C     | A           | A   | T   | A | C | A | T | A | C   | T |
| SARS-CoV-2 NC_045512.2 | (17366) | C     | A     | A     | T     | G     | G     | C     | C     | A     | A     | T           | A   | T   | A | T | A | T | A | T   | A |
|                        |         |       |       |       |       |       |       |       |       |       |       | Section 185 |     |     |   |   |   |   |   |     |   |
|                        | (17849) | 17849 | 17860 | 17870 | 17880 | 17890 | 17900 | 17910 | 17920 | 17930 | 17945 |             |     |     |   |   |   |   |   |     |   |
| HIV-1 HXB2             | (4645)  | T     | T     | G     | G     | A     | A     | T     | T     | C     | C     | T           | A   | C   | A | A | T | C | C | A   | A |
| SARS-CoV-2 NC_045512.2 | (17460) | A     | C     | G     | ---   | A     | C     | A     | T     | G     | C     | ---         | T   | A   | A | G | G | C | A | C   | T |
|                        |         |       |       |       |       |       |       |       |       |       |       | Section 186 |     |     |   |   |   |   |   |     |   |
|                        | (17946) | 17946 | 17960 | 17970 | 17980 | 17990 | 18000 | 18010 | 18020 | 18030 | 18042 |             |     |     |   |   |   |   |   |     |   |
| HIV-1 HXB2             | (4747)  | T     | C     | T     | T     | A     | A     | G     | A     | C     | A     | G           | C   | A   | G | T | A | C | A | A   | A |
| SARS-CoV-2 NC_045512.2 | (17547) | C     | C     | T     | C     | G     | G     | A     | A     | C     | T     | T           | G   | T   | C | G | G | T | T | G   | C |
|                        |         |       |       |       |       |       |       |       |       |       |       | Section 187 |     |     |   |   |   |   |   |     |   |
|                        | (18043) | 18043 | 18050 | 18060 | 18070 | 18080 | 18090 | 18100 | 18110 | 18120 | 18139 |             |     |     |   |   |   |   |   |     |   |
| HIV-1 HXB2             | (4826)  | A     | A     | T     | A     | G     | T     | A     | ---   | ---   | G     | ---         | A   | C   | A | T | A | A | T | A   | G |
| SARS-CoV-2 NC_045512.2 | (17638) | T     | C     | A     | G     | C     | T     | C     | A     | A     | T     | G           | C   | T   | T | T | A | A | T | A   | G |
|                        |         |       |       |       |       |       |       |       |       |       |       | Section 188 |     |     |   |   |   |   |   |     |   |
|                        | (18140) | 18140 | 18150 | 18160 | 18170 | 18180 | 18190 | 18200 | 18210 | 18220 | 18236 |             |     |     |   |   |   |   |   |     |   |
| HIV-1 HXB2             | (4906)  | A     | T     | T     | A     | C     | A     | G     | G     | G     | A     | C           | A   | G   | A | A | T | C | C | A   | C |
| SARS-CoV-2 NC_045512.2 | (17734) | C     | T     | T     | A     | ---   | ---   | C     | A     | C     | G     | T           | --- | A   | A | C | C | T | G | C   | T |
|                        |         |       |       |       |       |       |       |       |       |       |       | Section 189 |     |     |   |   |   |   |   |     |   |
|                        | (18237) | 18237 | 18250 | 18260 | 18270 | 18280 | 18290 | 18300 | 18310 | 18320 | 18333 |             |     |     |   |   |   |   |   |     |   |
| HIV-1 HXB2             | (4998)  | ---   | A     | ---   | T     | A     | A     | A     | G     | T     | A     | G           | --- | G   | G | A | T | A | G | --- | G |
| SARS-CoV-2 NC_045512.2 | (17822) | C     | A     | A     | C     | T     | C     | A     | A     | A     | C     | T           | G   | T   | G | A | T | T | C | A   | T |

SARS-CoV-2 & HIV-1.apr

|                        |         |                 |                 |            |             |            |               |                   |                   |                |                |                |
|------------------------|---------|-----------------|-----------------|------------|-------------|------------|---------------|-------------------|-------------------|----------------|----------------|----------------|
|                        |         |                 |                 |            |             |            |               |                   |                   |                |                | Section 190    |
|                        | (18334) | 18334           | 18340           | 18350      | 18360       | 18370      | 18380         | 18390             | 18400             | 18410          | 18420          | 18430          |
| HIV-1 HXB2             | (5081)  | ACAGGATGAGGATTA | -----GAA        | CAT--G     | AAAAGTTAGT  | TAAACACCAT | ATGTATGTTTCAG | GGAAAGCTAGGGGATGG | TTTTATAG          | ACATCAC        |                |                |
| SARS-CoV-2 NC_045512.2 | (17919) | TAATGTT---GC    | TATTACCA        | GAGCA      | AAAGTAGGCA  | TACTTTGCA  | T-----AATGTC  | TGATAGAG          | ACCTTTATGACAAG--T | TGCAATTTACA    | AGTC           |                |
|                        |         |                 |                 |            |             |            |               |                   |                   |                |                | Section 191    |
|                        | (18431) | 18431           | 18440           | 18450      | 18460       | 18470      | 18480         | 18490             | 18500             | 18510          |                | 18527          |
| HIV-1 HXB2             | (5170)  | TATGAAGC        | CCTCATCC        | AAGAA---T  | AAGTTCA     | AAGTAC     | ATCCCACT      | AGGGG--ATGCT      | AGATTGGTAATA      | ACAACAT--      | ATGGGGTCTGC    |                |
| SARS-CoV-2 NC_045512.2 | (18005) | TTGA-AA         | TTCCAGCT--      | AGGAA      | TGTGGCA     | AACTTTCA   | AAGCTG        | AAATGTAA          | ACAGGACTCTTTAA    | AGATTGTAGT--   | AAGGTAATCAC    | TGGGTT----     |
|                        |         |                 |                 |            |             |            |               |                   |                   |                |                | Section 192    |
|                        | (18528) | 18528           | 18540           | 18550      | 18560       | 18570      | 18580         | 18590             | 18600             | 18610          |                | 18624          |
| HIV-1 HXB2             | (5258)  | ATACAGGAGAA     | AGAGACTGG       | CATTTGGGT  | CAG-----G   | AGTCTCCAT  | AGAA          | TGGAGG            | AAAAAGAGATA       | TAGCACACA      | GTAGAC         | CCTGA          |
| SARS-CoV-2 NC_045512.2 | (18093) | --ACA           | TCCTACACAGGC--  | AC---CTACA | CACCTCAGT   | GTTGAC     | CTAAATTC      | AAA               | AACT-----GA       | AGTTTATGT      | -----GTT       | GACAT--ACTG    |
|                        |         |                 |                 |            |             |            |               |                   |                   |                |                | Section 193    |
|                        | (18625) | 18625           | 18630           | 18640      | 18650       | 18660      | 18670         | 18680             | 18690             | 18700          | 18710          | 18721          |
| HIV-1 HXB2             | (5347)  | GCAGACC-AA      | CTAATTCAT       | CTGTATT    | ACTTTGACT   | TGTTTTC    | AGACTCTGC     | TATAAGAA          | AGGCCTTAT         | TAGGACAC       | ATAGTTAG       | CCCTAGGTGTGA   |
| SARS-CoV-2 NC_045512.2 | (18170) | GCATACCTAA      | GGACATGAC       | CTATAGAA   | AGACT-CAT   | CTCTATGA-- | TGGGTTTATAA   | ATGAATTA          | ----TCAAGTTA      | ATGTTAC        | CCTA---A---CA  |                |
|                        |         |                 |                 |            |             |            |               |                   |                   |                |                | Section 194    |
|                        | (18722) | 18722           | 18730           | 18740      | 18750       | 18760      | 18770         | 18780             | 18790             | 18800          |                | 18818          |
| HIV-1 HXB2             | (5443)  | TA--TCA         | AGCAGGACAT      | AACAAG--G  | TAGGATCT--- | CTACA      | ATACTTGG      | CAC               | TAGCAG            | CATTAATAACACCA | AAAAAGATAA     | AGCCCACTTTGCCT |
| SARS-CoV-2 NC_045512.2 | (18254) | T-GTT-TAT       | CA              | CCCGCGAAG  | CTATAAG     | ACATGTAG   | GTGCATGGAT    | TGGCTTCGAT        | GTCGAG--GGGTGTC   | ATGCTACTAGAG   | AAGCTGTTGGTA   |                |
|                        |         |                 |                 |            |             |            |               |                   |                   |                |                | Section 195    |
|                        | (18819) | 18819           | 18830           | 18840      | 18850       | 18860      | 18870         | 18880             | 18890             | 18900          |                | 18915          |
| HIV-1 HXB2             | (5533)  | AGTGTT          | ACGAACTGACAGAGG | TAGATGG    | ACAAGCC     | CAGAA      | AGACCAAGGG    | CA-CAGA           | GGGAGCCAC         | -ACAATGAATG    | GACACTAGAG     | CTTTTA         |
| SARS-CoV-2 NC_045512.2 | (18347) | CCAA            | TTT-----AC      | TTTAC      | AGCTAGG     | TTTTTTCTAC | AGG-TGTTAAC   | C--TAGTT          | GCTGT--AC         | CTACAGG        | TTATGTTGATAC   | ACTAA          |
|                        |         |                 |                 |            |             |            |               |                   |                   |                |                | Section 196    |
|                        | (18916) | 18916           | 18930           | 18940      | 18950       | 18960      | 18970         | 18980             | 18990             | 19000          |                | 19012          |
| HIV-1 HXB2             | (5628)  | GAGGAG          | CTTAAGAA        | TGAAGCTGT  | TAGAC--AT   | TTTTCC     | TAGGATTT      | GGCTC             | CATGGC            | TTAGGG         | CACATATCTATGAA | ACTTATGGGGAT   |
| SARS-CoV-2 NC_045512.2 | (18428) | ATA---          | CAGATTTT        | TCCAGAGT   | TAG---TGC   | TAAACC     | ACCGCCTGG     | AGATCA---         | ATTAAAC           | CTCATACCACTTAT | -GTACAAAGG     | ACTTCTTT       |

SARS-CoV-2 & HIV-1.apr

|                        |         |         |             |         |          |           |          |        |         |                    |                  |             |            |      |           |           |             |         |            |             |           |        |       |        |          |        |     |      |     |     |     |
|------------------------|---------|---------|-------------|---------|----------|-----------|----------|--------|---------|--------------------|------------------|-------------|------------|------|-----------|-----------|-------------|---------|------------|-------------|-----------|--------|-------|--------|----------|--------|-----|------|-----|-----|-----|
|                        |         |         |             |         |          |           |          |        |         |                    |                  | Section 197 |            |      |           |           |             |         |            |             |           |        |       |        |          |        |     |      |     |     |     |
|                        | (19013) | 19013   | 19020       | 19030   | 19040    | 19050     | 19060    | 19070  | 19080   | 19090              | 19109            |             |            |      |           |           |             |         |            |             |           |        |       |        |          |        |     |      |     |     |     |
| HIV-1 HXB2             | (5723)  | AGGAGT  | GGAAGC      | CATAAT  | AAGAAT   | TCTGCAAC  | AACTGCT  | TGTTAT | CCATTT  | TCAGAATTGGGTGTCGAC | ATAGCAGAATAGGCGT | TAC         | TCGACAGAG  |      |           |           |             |         |            |             |           |        |       |        |          |        |     |      |     |     |     |
| SARS-CoV-2 NC_045512.2 | (18515) | GGAAT   | GTAGTG      | CGTATA  | AAGATT   | TGTAC---- | AAATGTT  | TAAGT  | GACAC-  | TTAA-----          | AAATCTCTCTG      | A           | CAGAGT     | TCG  | TATTTGT-- |           |             |         |            |             |           |        |       |        |          |        |     |      |     |     |     |
|                        |         |         |             |         |          |           |          |        |         |                    |                  | Section 198 |            |      |           |           |             |         |            |             |           |        |       |        |          |        |     |      |     |     |     |
|                        | (19110) | 19110   | 19120       | 19130   | 19140    | 19150     | 19160    | 19170  | 19180   | 19190              | 19206            |             |            |      |           |           |             |         |            |             |           |        |       |        |          |        |     |      |     |     |     |
| HIV-1 HXB2             | (5870)  | GAGAGC  | AAGAAATGGAG | CCAGT   | TAGATCCT | AGACT     | TAGAGCC  | CTG    | GAAGCAT | CCAGGA             | AGTCAGCCT        | AAAA        | CTGCTT     | GT   | ACC       | AA        | TTG         | CTAT    | TGT        | AAAA        |           |        |       |        |          |        |     |      |     |     |     |
| SARS-CoV-2 NC_045512.2 | (18591) | ---     | CTTAT       | GG----- | G-       | CACAT     | TGGCTTT  | GA     | -GT     | TGACAT             | CTAT             | GAAGTAT     | TTT        | TGT  | GA        | AAA-TAGG  | AC--        | CTGAGC  | G          | ACC         | TG        | TTG    | TCTA  | TGT    | GAT      | AG     |     |      |     |     |     |
|                        |         |         |             |         |          |           |          |        |         |                    |                  | Section 199 |            |      |           |           |             |         |            |             |           |        |       |        |          |        |     |      |     |     |     |
|                        | (19207) | 19207   | 19220       | 19230   | 19240    | 19250     | 19260    | 19270  | 19280   | 19290              | 19303            |             |            |      |           |           |             |         |            |             |           |        |       |        |          |        |     |      |     |     |     |
| HIV-1 HXB2             | (5917)  | GT      | GT          | TG      | CTTT     | CAT       | TGCCAAGT | TTG    | TTTCATA | AC                 | AA               | AGCC        | TTAGGCAT   | CTC  | CT        | AT        | GGCAGGA     | AGAA    | GCGGA      | GACAG       | CGAC      | GAAG   | AG    | CTCAT  | TCAGAA   | C      |     |      |     |     |     |
| SARS-CoV-2 NC_045512.2 | (18675) | AC      | GT          | GC      | CACATGC  | TTTTCCAC  | TGC      | TT     | CAGAC   | AC                 | TT               | AT          | GCC        | ---- | TG        | TTGG      | C           | -AT     | -CATTCT    | ATTG        | GATTT     | GATTA  | CGT   | CT     | ATA      | AT     | C   | CGT  | TT  | AT  | GAT |
|                        |         |         |             |         |          |           |          |        |         |                    |                  | Section 200 |            |      |           |           |             |         |            |             |           |        |       |        |          |        |     |      |     |     |     |
|                        | (19304) | 19304   | 19310       | 19320   | 19330    | 19340     | 19350    | 19360  | 19370   | 19380              | 19390            | 19400       |            |      |           |           |             |         |            |             |           |        |       |        |          |        |     |      |     |     |     |
| HIV-1 HXB2             | (6014)  | AGTC    | AGAC        | TCA     | TCAA     | GCTTC     | TCTAT    | CA---  | AA      | G                  | CAGTAAGT         | AGT         | ACATG      | TAA  | CGCAACC   | TAT       | TACCAATAGT  | TAG     | CAAT       | AGTAGCAT    | T         | AGTAG  | TAG   | CAA    |          |        |     |      |     |     |     |
| SARS-CoV-2 NC_045512.2 | (18765) | T--     | G           | ATGT    | TCA      | CAA       | TGGGG    | TTT    | TACA    | GGT                | AA               | C           | TA--       | CAA  | AG        | CA        | ACCAT       | TGA     | TCTGTAT    | TG          | TCAAGTCCA | TG     | T     | AATG-- | CACA     | T      | G   | TAGC | TAG | TTG |     |
|                        |         |         |             |         |          |           |          |        |         |                    |                  | Section 201 |            |      |           |           |             |         |            |             |           |        |       |        |          |        |     |      |     |     |     |
|                        | (19401) | 19401   | 19410       | 19420   | 19430    | 19440     | 19450    | 19460  | 19470   | 19480              | 19497            |             |            |      |           |           |             |         |            |             |           |        |       |        |          |        |     |      |     |     |     |
| HIV-1 HXB2             | (6108)  | TAATAAT | AG          | CAAT    | AGTT     | GTGTGG    | TCCA     | TAG    | TAA     | TCATA              | GAAT             | TATAGGAAA   | ATATTAAGAC | AAAG | AAAAA     | -T--      | AGACAGGT    | TAATTG  | ATAGACT    | AAT         |           |        |       |        |          |        |     |      |     |     |     |
| SARS-CoV-2 NC_045512.2 | (18855) | TGAT    | GCA         | AT      | CA       | TG        | ACTAG    | G----  | TGTC    | TAG                | CTG              | TC          | CAC        | GAGT | GCTTTGTT  | AAGCGTGTG | ACT         | G       | ACT        | AT          | TGA       | ATA    | TCCTA | TAATTG | G        | TGATGA | ACT |      |     |     |     |
|                        |         |         |             |         |          |           |          |        |         |                    |                  | Section 202 |            |      |           |           |             |         |            |             |           |        |       |        |          |        |     |      |     |     |     |
|                        | (19498) | 19498   | 19510       | 19520   | 19530    | 19540     | 19550    | 19560  | 19570   | 19580              | 19594            |             |            |      |           |           |             |         |            |             |           |        |       |        |          |        |     |      |     |     |     |
| HIV-1 HXB2             | (6202)  | AG      | AA          | AGAGCA  | GAA      | GACA      | GTGG     | CAATG  | -AG     | AGTGA              | AG               | GAGAAA      | TATCAGCA   | CT   | TGTGG     | AGAT      | GGGGTGGAGAT | GGGGCAC | CAT        | GCTCC       | TTGGG     | ATGT   |       |        |          |        |     |      |     |     |     |
| SARS-CoV-2 NC_045512.2 | (18948) | GA      | AG          | ATTAAT  | GCG      | GCTT      | GT       | AG     | AA      | G                  | TTCA             | AACACAT     | TGTTGT     | TA   | AAGCTG    | CAT       | TATT        | AG      | CAG        | GACAAATTCCA | GTTCTT    | -      | CAC   | G      | GACAT    | TG     | GT  | A    | CCC |     |     |
|                        |         |         |             |         |          |           |          |        |         |                    |                  | Section 203 |            |      |           |           |             |         |            |             |           |        |       |        |          |        |     |      |     |     |     |
|                        | (19595) | 19595   | 19600       | 19610   | 19620    | 19630     | 19640    | 19650  | 19660   | 19670              | 19680            | 19691       |            |      |           |           |             |         |            |             |           |        |       |        |          |        |     |      |     |     |     |
| HIV-1 HXB2             | (6298)  | TGAT    | GAT         | CTGT    | AGTG     | CTACAGAA  | AAAT     | TG     | TG      | GGTCA              | CAG              | TCTA        | TTAT       | GGG  | GTAC      | -CT       | GTG         | TG      | GAAGGAAGCA | ACCAC       | CACT--    | CTATT  | TTGT  | GCA    | TC       |        |     |      |     |     |     |
| SARS-CoV-2 NC_045512.2 | (19044) | TAAAGC  | TATTA       | AGTG    | TGTACCTC | AA        | GC       | TG     | AT      | G                  | TAGA             | AT          | GGAAG      | TT   | C         | TAT       | GATG        | CAC     | AG         | CCTT        | G--       | T----- | AGTGA | CA     | AAGC---- | TTAT   | TAA | AAT  |     |     |     |

SARS-CoV-2 & HIV-1.apr

|                                |         |                                                                                      |                                                |                                                 |                                       |                             |                |                   |       |       |             |
|--------------------------------|---------|--------------------------------------------------------------------------------------|------------------------------------------------|-------------------------------------------------|---------------------------------------|-----------------------------|----------------|-------------------|-------|-------|-------------|
|                                |         |                                                                                      |                                                |                                                 |                                       |                             |                |                   |       |       | Section 204 |
|                                | (19692) | 19692                                                                                | 19700                                          | 19710                                           | 19720                                 | 19730                       | 19740          | 19750             | 19760 | 19770 | 19788       |
| HIV-1 HXB2 (6392)              |         | AGATGCTAAAGCATATGATACAGAGGTACATAATGTTTGGGCCACACATGCCGTGTGTACCCACAGACCCCAACCCACA-AGAA | GTAGTTATTGGTAA                                 |                                                 |                                       |                             |                |                   |       |       |             |
| SARS-CoV-2 NC_045512.2 (19128) |         | AGAAGCAATTATTC                                                                       | TA--TCTTATGCCACACA--TCTGACAAATTCA              | CAGATG--GTGTATGCTATTTTG-----GAATTGCAATGTCGATAGA |                                       |                             |                |                   |       |       |             |
|                                |         |                                                                                      |                                                |                                                 |                                       |                             |                |                   |       |       | Section 205 |
|                                | (19789) | 19789                                                                                | 19800                                          | 19810                                           | 19820                                 | 19830                       | 19840          | 19850             | 19860 | 19870 | 19885       |
| HIV-1 HXB2 (6488)              |         | TGTGACAGAAATTTTAAACATGTTGGAAATGACATGGT                                               | AGA--ACAGATG-----CATGAGGATATAATCAGTTTATGGGATCA | AAGCCTAAAGCC                                    |                                       |                             |                |                   |       |       |             |
| SARS-CoV-2 NC_045512.2 (19213) |         | TATCCTGCTAA---                                                                       | TTCCATGTTTGTAGAT                               | T---TGACACTAGAGTGCTATCTAACTTA                   | ACTTGCCTGGTTGTGAT--GGTGGCAGTTTGTATGTA |                             |                |                   |       |       |             |
|                                |         |                                                                                      |                                                |                                                 |                                       |                             |                |                   |       |       | Section 206 |
|                                | (19886) | 19886                                                                                | 19900                                          | 19910                                           | 19920                                 | 19930                       | 19940          | 19950             | 19960 | 19970 | 19982       |
| HIV-1 HXB2 (6578)              |         | ATGTGTAAATTAACCCACTCTGTGTTAGT---                                                     | TTAAAGTGCAC                                    | TGATTTGAAGAATGATAC                              | TAATAACCAATAGTAGTAGCGG                | GAGAAATGATAATG              |                |                   |       |       |             |
| SARS-CoV-2 NC_045512.2 (19303) |         | A--ATAAACATGCATT                                                                     | CCACAACCAGCTTTGA                               | TAAAGTGC                                        | TTTGTAAATTTAA                         | AACAATTA                    | CCATT-TTCTATTA | CTCTGACAGT--CCATG |       |       |             |
|                                |         |                                                                                      |                                                |                                                 |                                       |                             |                |                   |       |       | Section 207 |
|                                | (19983) | 19983                                                                                | 19990                                          | 20000                                           | 20010                                 | 20020                       | 20030          | 20040             | 20050 | 20060 | 20079       |
| HIV-1 HXB2 (6672)              |         | GAGAAAGGAGAGAT                                                                       | AAAACCTGCTT-----C-----TTTCAATATCAGC----        | ACAAGCATAA-----GAGGTAAAGGTGCA                   |                                       |                             |                |                   |       |       |             |
| SARS-CoV-2 NC_045512.2 (19395) |         | TGA-GTCTCATGGA                                                                       | AAACAGTAGTGTCAGATATAGATTATGTAC                 | CACTAAAGTCTGCTACGTGTATAA                        | CACGTTGCAATTTAGGTGGTGCTGTCTG          |                             |                |                   |       |       |             |
|                                |         |                                                                                      |                                                |                                                 |                                       |                             |                |                   |       |       | Section 208 |
|                                | (20080) | 20080                                                                                | 20090                                          | 20100                                           | 20110                                 | 20120                       | 20130          | 20140             | 20150 | 20160 | 20176       |
| HIV-1 HXB2 (6734)              |         | GAAAGAAATATGCATT                                                                     | TTTTATAAACTTGATATAATA--CC                      | AATAGATAATGATACTAC                              | CAGCTATAAGTTGACAAAGTGTAAAC            | ACCTCAGTCA                  | TTA            |                   |       |       |             |
| SARS-CoV-2 NC_045512.2 (19491) |         | TAGACATCATGCTAA                                                                      | TGAGTACAGATTGTATCTCGATGCTTATA                  | ACATGATGATCTCAGCTGGCTTAGCTTG-TGGTTACA           | AACAATTGAT-A                          |                             |                |                   |       |       |             |
|                                |         |                                                                                      |                                                |                                                 |                                       |                             |                |                   |       |       | Section 209 |
|                                | (20177) | 20177                                                                                | 20190                                          | 20200                                           | 20210                                 | 20220                       | 20230          | 20240             | 20250 | 20260 | 20273       |
| HIV-1 HXB2 (6829)              |         | CACAGGCCTGT                                                                          | CAAAGGTATCCTTTGAGCAAT-TCC                      | CATACAT                                         | TATTGTGCCCCGGCTGGTTT                  | TGCGATTCTAA                 | AAATGTAATAAT   | AAGACGTTCA        |       |       |             |
| SARS-CoV-2 NC_045512.2 (19586) |         | CTTATAACCT-                                                                          | CTGGA-ACACT---                                 | TTACAAGACTT                                     | CGAGTTTAGAA--AATGTGGCTTTTAA           | TGTTGTAAAT                  | AAAGGACACTT    | TGATGGACAAC       |       |       |             |
|                                |         |                                                                                      |                                                |                                                 |                                       |                             |                |                   |       |       | Section 210 |
|                                | (20274) | 20274                                                                                | 20280                                          | 20290                                           | 20300                                 | 20310                       | 20320          | 20330             | 20340 | 20350 | 20360 20370 |
| HIV-1 HXB2 (6925)              |         | ATGGAACAGGACCATGTACAAATGTCAGCACAGTAC                                                 | AATGTACACATGGAATTAG                            | CCAGTAGTATCAACTCAAC                             | TGCTGTTAAATGGCAGTCTAGC                |                             |                |                   |       |       |             |
| SARS-CoV-2 NC_045512.2 (19676) |         | AGGGTGAAGTACCA                                                                       | GTTCTATCATTA--ATAAC                            | ACTGTTTACACA                                    | AAAGTTGATGGTGTGATGTAGA                | ATTGTTTGAA-AATAAAC-AACATTAC |                |                   |       |       |             |

## SARS-CoV-2 &amp; HIV-1.apr

|                        |         |       |       |          |       |        |       |       |       |       |       |         |      |    |       |             |      |      |         |        |      |    |        |         |    |      |     |       |      |       |       |    |    |       |   |   |   |   |   |   |   |   |   |   |   |   |     |     |   |   |   |   |   |   |   |   |   |   |   |   |   |   |   |   |   |   |   |   |   |   |   |   |   |   |   |   |   |   |   |   |   |   |   |   |   |   |   |   |   |   |   |   |   |   |   |   |   |   |   |   |   |   |   |   |   |   |   |   |   |   |   |   |   |   |   |   |   |   |   |   |   |   |   |   |   |   |   |   |   |   |   |   |   |   |   |   |   |   |   |   |   |   |   |   |   |   |   |   |   |   |   |   |   |   |   |   |   |   |   |   |   |   |   |   |   |   |   |   |   |   |   |   |   |   |   |   |   |   |   |   |   |   |   |   |   |   |   |   |   |   |   |   |   |   |   |   |   |   |   |   |   |   |   |   |   |   |   |   |   |   |   |   |   |   |   |   |   |   |   |   |   |   |   |   |   |   |   |   |   |   |   |   |   |   |   |   |   |   |   |   |   |   |   |   |   |   |   |   |   |   |   |   |   |   |   |   |   |   |   |   |   |   |   |   |   |   |   |   |   |   |   |   |   |   |   |   |   |   |   |   |   |   |   |   |   |   |   |   |   |   |   |   |   |   |   |   |   |   |   |   |   |   |   |   |   |   |   |   |   |   |   |   |   |   |   |   |   |   |   |   |   |   |   |   |   |   |   |   |   |   |   |   |   |   |   |   |   |   |   |   |   |   |   |   |   |   |   |   |   |   |   |   |   |   |   |   |   |   |   |   |   |   |   |   |   |   |   |   |   |   |   |   |   |   |   |   |   |   |   |   |   |   |   |   |   |   |   |   |   |   |   |   |   |   |   |   |   |   |   |   |   |   |   |   |   |   |   |   |   |   |   |   |   |   |   |   |   |   |   |   |   |   |   |   |   |   |   |   |   |   |   |   |   |   |   |   |   |   |   |   |   |   |   |   |   |   |   |   |   |   |   |   |   |   |   |   |   |   |   |   |   |   |   |   |   |   |   |   |   |   |   |   |   |   |   |   |   |   |   |   |   |   |   |   |   |   |   |   |   |   |   |   |   |   |   |   |   |   |   |   |   |   |   |   |   |   |   |   |   |   |   |   |   |   |   |   |   |   |   |   |   |   |   |   |   |   |   |   |   |   |   |   |   |   |   |   |   |   |   |   |   |   |   |   |   |   |   |   |   |   |   |   |   |   |   |   |   |   |   |   |   |   |   |   |   |   |   |   |   |   |   |   |   |   |   |   |   |   |   |   |   |   |   |   |   |   |   |   |   |   |   |   |   |   |   |   |   |   |   |   |   |   |   |   |   |   |   |   |   |   |   |   |   |   |   |   |   |   |   |   |   |   |   |   |   |   |   |   |   |   |   |   |   |   |   |   |   |   |   |   |   |   |   |   |   |   |   |   |   |   |   |   |   |   |   |   |   |   |   |   |   |   |   |   |   |   |   |   |   |   |   |   |   |   |   |   |   |   |   |   |   |   |   |   |   |   |   |   |   |   |   |   |   |   |   |   |   |   |   |   |   |   |   |   |   |   |   |   |   |   |   |   |   |   |   |   |   |   |   |   |   |   |   |   |   |   |   |   |   |   |   |   |   |   |   |   |   |   |   |   |   |   |   |   |   |   |   |   |   |   |   |   |   |   |   |   |   |   |   |   |   |   |   |   |   |   |   |   |   |   |   |   |   |   |   |   |   |   |   |   |   |   |   |   |   |   |   |   |   |   |   |   |   |   |   |   |   |   |   |   |   |   |   |   |   |   |   |   |   |   |   |   |   |   |   |   |   |   |   |   |   |   |   |   |   |   |   |   |   |   |   |   |   |   |   |   |   |   |   |   |   |   |   |   |   |   |   |   |   |   |   |   |   |   |   |   |   |   |   |   |   |   |   |   |   |   |   |   |   |   |   |   |   |   |   |   |   |   |   |   |   |   |   |   |   |   |   |   |   |   |   |   |   |   |   |   |   |   |   |   |   |   |   |   |   |   |   |   |   |   |   |   |   |   |   |   |   |   |   |   |   |   |   |   |   |   |   |   |   |   |   |   |   |   |   |   |   |   |   |   |   |   |   |   |   |   |   |   |   |   |   |   |   |   |   |   |   |   |   |   |   |   |   |   |   |   |   |   |   |   |   |   |   |   |   |   |   |   |   |   |   |   |   |   |   |   |   |   |   |   |   |   |   |   |   |   |   |   |   |   |   |   |   |   |   |   |   |   |   |   |   |   |   |   |   |   |   |   |   |   |   |   |   |   |   |   |   |   |   |   |   |   |   |   |   |   |   |   |   |   |   |   |   |   |   |   |   |   |   |   |   |   |   |   |   |   |   |   |   |   |   |   |   |   |   |   |   |   |   |   |   |   |   |   |   |   |   |   |   |   |   |   |   |   |   |   |   |   |   |   |   |   |   |   |   |   |   |   |   |   |   |   |   |   |   |   |   |   |   |   |   |   |   |   |   |   |   |   |   |   |   |   |   |   |   |   |   |   |   |   |   |   |   |   |   |   |   |
|------------------------|---------|-------|-------|----------|-------|--------|-------|-------|-------|-------|-------|---------|------|----|-------|-------------|------|------|---------|--------|------|----|--------|---------|----|------|-----|-------|------|-------|-------|----|----|-------|---|---|---|---|---|---|---|---|---|---|---|---|-----|-----|---|---|---|---|---|---|---|---|---|---|---|---|---|---|---|---|---|---|---|---|---|---|---|---|---|---|---|---|---|---|---|---|---|---|---|---|---|---|---|---|---|---|---|---|---|---|---|---|---|---|---|---|---|---|---|---|---|---|---|---|---|---|---|---|---|---|---|---|---|---|---|---|---|---|---|---|---|---|---|---|---|---|---|---|---|---|---|---|---|---|---|---|---|---|---|---|---|---|---|---|---|---|---|---|---|---|---|---|---|---|---|---|---|---|---|---|---|---|---|---|---|---|---|---|---|---|---|---|---|---|---|---|---|---|---|---|---|---|---|---|---|---|---|---|---|---|---|---|---|---|---|---|---|---|---|---|---|---|---|---|---|---|---|---|---|---|---|---|---|---|---|---|---|---|---|---|---|---|---|---|---|---|---|---|---|---|---|---|---|---|---|---|---|---|---|---|---|---|---|---|---|---|---|---|---|---|---|---|---|---|---|---|---|---|---|---|---|---|---|---|---|---|---|---|---|---|---|---|---|---|---|---|---|---|---|---|---|---|---|---|---|---|---|---|---|---|---|---|---|---|---|---|---|---|---|---|---|---|---|---|---|---|---|---|---|---|---|---|---|---|---|---|---|---|---|---|---|---|---|---|---|---|---|---|---|---|---|---|---|---|---|---|---|---|---|---|---|---|---|---|---|---|---|---|---|---|---|---|---|---|---|---|---|---|---|---|---|---|---|---|---|---|---|---|---|---|---|---|---|---|---|---|---|---|---|---|---|---|---|---|---|---|---|---|---|---|---|---|---|---|---|---|---|---|---|---|---|---|---|---|---|---|---|---|---|---|---|---|---|---|---|---|---|---|---|---|---|---|---|---|---|---|---|---|---|---|---|---|---|---|---|---|---|---|---|---|---|---|---|---|---|---|---|---|---|---|---|---|---|---|---|---|---|---|---|---|---|---|---|---|---|---|---|---|---|---|---|---|---|---|---|---|---|---|---|---|---|---|---|---|---|---|---|---|---|---|---|---|---|---|---|---|---|---|---|---|---|---|---|---|---|---|---|---|---|---|---|---|---|---|---|---|---|---|---|---|---|---|---|---|---|---|---|---|---|---|---|---|---|---|---|---|---|---|---|---|---|---|---|---|---|---|---|---|---|---|---|---|---|---|---|---|---|---|---|---|---|---|---|---|---|---|---|---|---|---|---|---|---|---|---|---|---|---|---|---|---|---|---|---|---|---|---|---|---|---|---|---|---|---|---|---|---|---|---|---|---|---|---|---|---|---|---|---|---|---|---|---|---|---|---|---|---|---|---|---|---|---|---|---|---|---|---|---|---|---|---|---|---|---|---|---|---|---|---|---|---|---|---|---|---|---|---|---|---|---|---|---|---|---|---|---|---|---|---|---|---|---|---|---|---|---|---|---|---|---|---|---|---|---|---|---|---|---|---|---|---|---|---|---|---|---|---|---|---|---|---|---|---|---|---|---|---|---|---|---|---|---|---|---|---|---|---|---|---|---|---|---|---|---|---|---|---|---|---|---|---|---|---|---|---|---|---|---|---|---|---|---|---|---|---|---|---|---|---|---|---|---|---|---|---|---|---|---|---|---|---|---|---|---|---|---|---|---|---|---|---|---|---|---|---|---|---|---|---|---|---|---|---|---|---|---|---|---|---|---|---|---|---|---|---|---|---|---|---|---|---|---|---|---|---|---|---|---|---|---|---|---|---|---|---|---|---|---|---|---|---|---|---|---|---|---|---|---|---|---|---|---|---|---|---|---|---|---|---|---|---|---|---|---|---|---|---|---|---|---|---|---|---|---|---|---|---|---|---|---|---|---|---|---|---|---|---|---|---|---|---|---|---|---|---|---|---|---|---|---|---|---|---|---|---|---|---|---|---|---|---|---|---|---|---|---|---|---|---|---|---|---|---|---|---|---|---|---|---|---|---|---|---|---|---|---|---|---|---|---|---|---|---|---|---|---|---|---|---|---|---|---|---|---|---|---|---|---|---|---|---|---|---|---|---|---|---|---|---|---|---|---|---|---|---|---|---|---|---|---|---|---|---|---|---|---|---|---|---|---|---|---|---|---|---|---|---|---|---|---|---|---|---|---|---|---|---|---|---|---|---|---|---|---|---|---|---|---|---|---|---|---|---|---|---|---|---|---|---|---|---|---|---|---|---|---|---|---|---|---|---|---|---|---|---|---|---|---|---|---|---|---|---|---|---|---|---|---|---|---|---|---|---|---|---|---|---|---|---|---|---|---|---|---|---|---|---|---|---|---|---|---|---|---|---|---|---|---|---|---|---|---|---|---|---|---|---|---|---|---|---|---|---|---|---|---|---|---|---|---|---|---|---|---|---|---|---|---|---|---|---|---|---|---|---|---|---|---|---|---|---|---|---|---|---|---|---|---|---|---|---|---|---|---|---|---|---|---|---|---|---|---|---|---|---|---|---|---|---|---|---|---|---|
|                        |         |       |       |          |       |        |       |       |       |       |       |         |      |    |       | Section 211 |      |      |         |        |      |    |        |         |    |      |     |       |      |       |       |    |    |       |   |   |   |   |   |   |   |   |   |   |   |   |     |     |   |   |   |   |   |   |   |   |   |   |   |   |   |   |   |   |   |   |   |   |   |   |   |   |   |   |   |   |   |   |   |   |   |   |   |   |   |   |   |   |   |   |   |   |   |   |   |   |   |   |   |   |   |   |   |   |   |   |   |   |   |   |   |   |   |   |   |   |   |   |   |   |   |   |   |   |   |   |   |   |   |   |   |   |   |   |   |   |   |   |   |   |   |   |   |   |   |   |   |   |   |   |   |   |   |   |   |   |   |   |   |   |   |   |   |   |   |   |   |   |   |   |   |   |   |   |   |   |   |   |   |   |   |   |   |   |   |   |   |   |   |   |   |   |   |   |   |   |   |   |   |   |   |   |   |   |   |   |   |   |   |   |   |   |   |   |   |   |   |   |   |   |   |   |   |   |   |   |   |   |   |   |   |   |   |   |   |   |   |   |   |   |   |   |   |   |   |   |   |   |   |   |   |   |   |   |   |   |   |   |   |   |   |   |   |   |   |   |   |   |   |   |   |   |   |   |   |   |   |   |   |   |   |   |   |   |   |   |   |   |   |   |   |   |   |   |   |   |   |   |   |   |   |   |   |   |   |   |   |   |   |   |   |   |   |   |   |   |   |   |   |   |   |   |   |   |   |   |   |   |   |   |   |   |   |   |   |   |   |   |   |   |   |   |   |   |   |   |   |   |   |   |   |   |   |   |   |   |   |   |   |   |   |   |   |   |   |   |   |   |   |   |   |   |   |   |   |   |   |   |   |   |   |   |   |   |   |   |   |   |   |   |   |   |   |   |   |   |   |   |   |   |   |   |   |   |   |   |   |   |   |   |   |   |   |   |   |   |   |   |   |   |   |   |   |   |   |   |   |   |   |   |   |   |   |   |   |   |   |   |   |   |   |   |   |   |   |   |   |   |   |   |   |   |   |   |   |   |   |   |   |   |   |   |   |   |   |   |   |   |   |   |   |   |   |   |   |   |   |   |   |   |   |   |   |   |   |   |   |   |   |   |   |   |   |   |   |   |   |   |   |   |   |   |   |   |   |   |   |   |   |   |   |   |   |   |   |   |   |   |   |   |   |   |   |   |   |   |   |   |   |   |   |   |   |   |   |   |   |   |   |   |   |   |   |   |   |   |   |   |   |   |   |   |   |   |   |   |   |   |   |   |   |   |   |   |   |   |   |   |   |   |   |   |   |   |   |   |   |   |   |   |   |   |   |   |   |   |   |   |   |   |   |   |   |   |   |   |   |   |   |   |   |   |   |   |   |   |   |   |   |   |   |   |   |   |   |   |   |   |   |   |   |   |   |   |   |   |   |   |   |   |   |   |   |   |   |   |   |   |   |   |   |   |   |   |   |   |   |   |   |   |   |   |   |   |   |   |   |   |   |   |   |   |   |   |   |   |   |   |   |   |   |   |   |   |   |   |   |   |   |   |   |   |   |   |   |   |   |   |   |   |   |   |   |   |   |   |   |   |   |   |   |   |   |   |   |   |   |   |   |   |   |   |   |   |   |   |   |   |   |   |   |   |   |   |   |   |   |   |   |   |   |   |   |   |   |   |   |   |   |   |   |   |   |   |   |   |   |   |   |   |   |   |   |   |   |   |   |   |   |   |   |   |   |   |   |   |   |   |   |   |   |   |   |   |   |   |   |   |   |   |   |   |   |   |   |   |   |   |   |   |   |   |   |   |   |   |   |   |   |   |   |   |   |   |   |   |   |   |   |   |   |   |   |   |   |   |   |   |   |   |   |   |   |   |   |   |   |   |   |   |   |   |   |   |   |   |   |   |   |   |   |   |   |   |   |   |   |   |   |   |   |   |   |   |   |   |   |   |   |   |   |   |   |   |   |   |   |   |   |   |   |   |   |   |   |   |   |   |   |   |   |   |   |   |   |   |   |   |   |   |   |   |   |   |   |   |   |   |   |   |   |   |   |   |   |   |   |   |   |   |   |   |   |   |   |   |   |   |   |   |   |   |   |   |   |   |   |   |   |   |   |   |   |   |   |   |   |   |   |   |   |   |   |   |   |   |   |   |   |   |   |   |   |   |   |   |   |   |   |   |   |   |   |   |   |   |   |   |   |   |   |   |   |   |   |   |   |   |   |   |   |   |   |   |   |   |   |   |   |   |   |   |   |   |   |   |   |   |   |   |   |   |   |   |   |   |   |   |   |   |   |   |   |   |   |   |   |   |   |   |   |   |   |   |   |   |   |   |   |   |   |   |   |   |   |   |   |   |   |   |   |   |   |   |   |   |   |   |   |   |   |   |   |   |   |   |   |   |   |   |   |   |   |   |   |   |   |   |   |   |   |   |   |   |   |   |   |   |   |   |   |   |   |   |   |   |   |   |   |   |   |   |   |   |   |   |   |   |   |   |   |   |   |   |   |   |   |   |   |   |   |   |   |   |   |   |   |   |   |   |   |   |   |   |   |   |   |   |   |   |   |   |   |   |   |   |   |
|                        | (20371) | 20371 | 20380 | 20390    | 20400 | 20410  | 20420 | 20430 | 20440 | 20450 | 20467 |         |      |    |       |             |      |      |         |        |      |    |        |         |    |      |     |       |      |       |       |    |    |       |   |   |   |   |   |   |   |   |   |   |   |   |     |     |   |   |   |   |   |   |   |   |   |   |   |   |   |   |   |   |   |   |   |   |   |   |   |   |   |   |   |   |   |   |   |   |   |   |   |   |   |   |   |   |   |   |   |   |   |   |   |   |   |   |   |   |   |   |   |   |   |   |   |   |   |   |   |   |   |   |   |   |   |   |   |   |   |   |   |   |   |   |   |   |   |   |   |   |   |   |   |   |   |   |   |   |   |   |   |   |   |   |   |   |   |   |   |   |   |   |   |   |   |   |   |   |   |   |   |   |   |   |   |   |   |   |   |   |   |   |   |   |   |   |   |   |   |   |   |   |   |   |   |   |   |   |   |   |   |   |   |   |   |   |   |   |   |   |   |   |   |   |   |   |   |   |   |   |   |   |   |   |   |   |   |   |   |   |   |   |   |   |   |   |   |   |   |   |   |   |   |   |   |   |   |   |   |   |   |   |   |   |   |   |   |   |   |   |   |   |   |   |   |   |   |   |   |   |   |   |   |   |   |   |   |   |   |   |   |   |   |   |   |   |   |   |   |   |   |   |   |   |   |   |   |   |   |   |   |   |   |   |   |   |   |   |   |   |   |   |   |   |   |   |   |   |   |   |   |   |   |   |   |   |   |   |   |   |   |   |   |   |   |   |   |   |   |   |   |   |   |   |   |   |   |   |   |   |   |   |   |   |   |   |   |   |   |   |   |   |   |   |   |   |   |   |   |   |   |   |   |   |   |   |   |   |   |   |   |   |   |   |   |   |   |   |   |   |   |   |   |   |   |   |   |   |   |   |   |   |   |   |   |   |   |   |   |   |   |   |   |   |   |   |   |   |   |   |   |   |   |   |   |   |   |   |   |   |   |   |   |   |   |   |   |   |   |   |   |   |   |   |   |   |   |   |   |   |   |   |   |   |   |   |   |   |   |   |   |   |   |   |   |   |   |   |   |   |   |   |   |   |   |   |   |   |   |   |   |   |   |   |   |   |   |   |   |   |   |   |   |   |   |   |   |   |   |   |   |   |   |   |   |   |   |   |   |   |   |   |   |   |   |   |   |   |   |   |   |   |   |   |   |   |   |   |   |   |   |   |   |   |   |   |   |   |   |   |   |   |   |   |   |   |   |   |   |   |   |   |   |   |   |   |   |   |   |   |   |   |   |   |   |   |   |   |   |   |   |   |   |   |   |   |   |   |   |   |   |   |   |   |   |   |   |   |   |   |   |   |   |   |   |   |   |   |   |   |   |   |   |   |   |   |   |   |   |   |   |   |   |   |   |   |   |   |   |   |   |   |   |   |   |   |   |   |   |   |   |   |   |   |   |   |   |   |   |   |   |   |   |   |   |   |   |   |   |   |   |   |   |   |   |   |   |   |   |   |   |   |   |   |   |   |   |   |   |   |   |   |   |   |   |   |   |   |   |   |   |   |   |   |   |   |   |   |   |   |   |   |   |   |   |   |   |   |   |   |   |   |   |   |   |   |   |   |   |   |   |   |   |   |   |   |   |   |   |   |   |   |   |   |   |   |   |   |   |   |   |   |   |   |   |   |   |   |   |   |   |   |   |   |   |   |   |   |   |   |   |   |   |   |   |   |   |   |   |   |   |   |   |   |   |   |   |   |   |   |   |   |   |   |   |   |   |   |   |   |   |   |   |   |   |   |   |   |   |   |   |   |   |   |   |   |   |   |   |   |   |   |   |   |   |   |   |   |   |   |   |   |   |   |   |   |   |   |   |   |   |   |   |   |   |   |   |   |   |   |   |   |   |   |   |   |   |   |   |   |   |   |   |   |   |   |   |   |   |   |   |   |   |   |   |   |   |   |   |   |   |   |   |   |   |   |   |   |   |   |   |   |   |   |   |   |   |   |   |   |   |   |   |   |   |   |   |   |   |   |   |   |   |   |   |   |   |   |   |   |   |   |   |   |   |   |   |   |   |   |   |   |   |   |   |   |   |   |   |   |   |   |   |   |   |   |   |   |   |   |   |   |   |   |   |   |   |   |   |   |   |   |   |   |   |   |   |   |   |   |   |   |   |   |   |   |   |   |   |   |   |   |   |   |   |   |   |   |   |   |   |   |   |   |   |   |   |   |   |   |   |   |   |   |   |   |   |   |   |   |   |   |   |   |   |   |   |   |   |   |   |   |   |   |   |   |   |   |   |   |   |   |   |   |   |   |   |   |   |   |   |   |   |   |   |   |   |   |   |   |   |   |   |   |   |   |   |   |   |   |   |   |   |   |   |   |   |   |   |   |   |   |   |   |   |   |   |   |   |   |   |   |   |   |   |   |   |   |   |   |   |   |   |   |   |   |   |   |   |   |   |   |   |   |   |   |   |   |   |   |   |   |   |   |   |   |   |   |   |   |   |   |   |   |   |   |   |   |   |   |   |   |   |   |   |   |   |   |   |   |   |   |   |   |   |   |   |   |   |   |   |   |   |   |   |   |   |   |   |   |   |   |   |   |   |
| HIV-1 HXB2             | (7022)  | AGAAG | AA    | GAGGTAGT | AA    | TTAGAT | CT    | GT    | CAAT  | TTCA  | CG    | GACAATG | CTAA | AA | CCAT  | AA          | TAGT | AC   | AG      | CTGAAC | AC   | AT | CTGT   | AGA     | AA | T    | TAA | TT    | GT   | TACAA | GA    |    |    |       |   |   |   |   |   |   |   |   |   |   |   |   |     |     |   |   |   |   |   |   |   |   |   |   |   |   |   |   |   |   |   |   |   |   |   |   |   |   |   |   |   |   |   |   |   |   |   |   |   |   |   |   |   |   |   |   |   |   |   |   |   |   |   |   |   |   |   |   |   |   |   |   |   |   |   |   |   |   |   |   |   |   |   |   |   |   |   |   |   |   |   |   |   |   |   |   |   |   |   |   |   |   |   |   |   |   |   |   |   |   |   |   |   |   |   |   |   |   |   |   |   |   |   |   |   |   |   |   |   |   |   |   |   |   |   |   |   |   |   |   |   |   |   |   |   |   |   |   |   |   |   |   |   |   |   |   |   |   |   |   |   |   |   |   |   |   |   |   |   |   |   |   |   |   |   |   |   |   |   |   |   |   |   |   |   |   |   |   |   |   |   |   |   |   |   |   |   |   |   |   |   |   |   |   |   |   |   |   |   |   |   |   |   |   |   |   |   |   |   |   |   |   |   |   |   |   |   |   |   |   |   |   |   |   |   |   |   |   |   |   |   |   |   |   |   |   |   |   |   |   |   |   |   |   |   |   |   |   |   |   |   |   |   |   |   |   |   |   |   |   |   |   |   |   |   |   |   |   |   |   |   |   |   |   |   |   |   |   |   |   |   |   |   |   |   |   |   |   |   |   |   |   |   |   |   |   |   |   |   |   |   |   |   |   |   |   |   |   |   |   |   |   |   |   |   |   |   |   |   |   |   |   |   |   |   |   |   |   |   |   |   |   |   |   |   |   |   |   |   |   |   |   |   |   |   |   |   |   |   |   |   |   |   |   |   |   |   |   |   |   |   |   |   |   |   |   |   |   |   |   |   |   |   |   |   |   |   |   |   |   |   |   |   |   |   |   |   |   |   |   |   |   |   |   |   |   |   |   |   |   |   |   |   |   |   |   |   |   |   |   |   |   |   |   |   |   |   |   |   |   |   |   |   |   |   |   |   |   |   |   |   |   |   |   |   |   |   |   |   |   |   |   |   |   |   |   |   |   |   |   |   |   |   |   |   |   |   |   |   |   |   |   |   |   |   |   |   |   |   |   |   |   |   |   |   |   |   |   |   |   |   |   |   |   |   |   |   |   |   |   |   |   |   |   |   |   |   |   |   |   |   |   |   |   |   |   |   |   |   |   |   |   |   |   |   |   |   |   |   |   |   |   |   |   |   |   |   |   |   |   |   |   |   |   |   |   |   |   |   |   |   |   |   |   |   |   |   |   |   |   |   |   |   |   |   |   |   |   |   |   |   |   |   |   |   |   |   |   |   |   |   |   |   |   |   |   |   |   |   |   |   |   |   |   |   |   |   |   |   |   |   |   |   |   |   |   |   |   |   |   |   |   |   |   |   |   |   |   |   |   |   |   |   |   |   |   |   |   |   |   |   |   |   |   |   |   |   |   |   |   |   |   |   |   |   |   |   |   |   |   |   |   |   |   |   |   |   |   |   |   |   |   |   |   |   |   |   |   |   |   |   |   |   |   |   |   |   |   |   |   |   |   |   |   |   |   |   |   |   |   |   |   |   |   |   |   |   |   |   |   |   |   |   |   |   |   |   |   |   |   |   |   |   |   |   |   |   |   |   |   |   |   |   |   |   |   |   |   |   |   |   |   |   |   |   |   |   |   |   |   |   |   |   |   |   |   |   |   |   |   |   |   |   |   |   |   |   |   |   |   |   |   |   |   |   |   |   |   |   |   |   |   |   |   |   |   |   |   |   |   |   |   |   |   |   |   |   |   |   |   |   |   |   |   |   |   |   |   |   |   |   |   |   |   |   |   |   |   |   |   |   |   |   |   |   |   |   |   |   |   |   |   |   |   |   |   |   |   |   |   |   |   |   |   |   |   |   |   |   |   |   |   |   |   |   |   |   |   |   |   |   |   |   |   |   |   |   |   |   |   |   |   |   |   |   |   |   |   |   |   |   |   |   |   |   |   |   |   |   |   |   |   |   |   |   |   |   |   |   |   |   |   |   |   |   |   |   |   |   |   |   |   |   |   |   |   |   |   |   |   |   |   |   |   |   |   |   |   |   |   |   |   |   |   |   |   |   |   |   |   |   |   |   |   |   |   |   |   |   |   |   |   |   |   |   |   |   |   |   |   |   |   |   |   |   |   |   |   |   |   |   |   |   |   |   |   |   |   |   |   |   |   |   |   |   |   |   |   |   |   |   |   |   |   |   |   |   |   |   |   |   |   |   |   |   |   |   |   |   |   |   |   |   |   |   |   |   |   |   |   |   |   |   |   |   |   |   |   |   |   |   |   |   |   |   |   |   |   |   |   |   |   |   |   |   |   |   |   |   |   |   |   |   |   |   |   |   |   |   |   |   |   |   |   |   |   |   |   |   |   |   |   |   |   |   |   |   |   |   |   |   |   |   |   |   |   |   |   |   |   |   |   |   |   |   |   |   |   |   |   |   |   |   |   |   |   |   |   |   |   |   |   |   |
| SARS-CoV-2 NC_045512.2 | (19769) | CTGTT | AA    | TGTAG--  | CA    | TTGA-G | CTT   | TGGGC | T     | AAG   | CG    | ----    | CAA  | G  | ATT   | AA          | A-CC | AG   | TA      | CC     | AG   | AG | G-T-GA | AA      | AT | ACTC | AAT | AA    | -TT- | TGG   | GTGTG | GA |    |       |   |   |   |   |   |   |   |   |   |   |   |   |     |     |   |   |   |   |   |   |   |   |   |   |   |   |   |   |   |   |   |   |   |   |   |   |   |   |   |   |   |   |   |   |   |   |   |   |   |   |   |   |   |   |   |   |   |   |   |   |   |   |   |   |   |   |   |   |   |   |   |   |   |   |   |   |   |   |   |   |   |   |   |   |   |   |   |   |   |   |   |   |   |   |   |   |   |   |   |   |   |   |   |   |   |   |   |   |   |   |   |   |   |   |   |   |   |   |   |   |   |   |   |   |   |   |   |   |   |   |   |   |   |   |   |   |   |   |   |   |   |   |   |   |   |   |   |   |   |   |   |   |   |   |   |   |   |   |   |   |   |   |   |   |   |   |   |   |   |   |   |   |   |   |   |   |   |   |   |   |   |   |   |   |   |   |   |   |   |   |   |   |   |   |   |   |   |   |   |   |   |   |   |   |   |   |   |   |   |   |   |   |   |   |   |   |   |   |   |   |   |   |   |   |   |   |   |   |   |   |   |   |   |   |   |   |   |   |   |   |   |   |   |   |   |   |   |   |   |   |   |   |   |   |   |   |   |   |   |   |   |   |   |   |   |   |   |   |   |   |   |   |   |   |   |   |   |   |   |   |   |   |   |   |   |   |   |   |   |   |   |   |   |   |   |   |   |   |   |   |   |   |   |   |   |   |   |   |   |   |   |   |   |   |   |   |   |   |   |   |   |   |   |   |   |   |   |   |   |   |   |   |   |   |   |   |   |   |   |   |   |   |   |   |   |   |   |   |   |   |   |   |   |   |   |   |   |   |   |   |   |   |   |   |   |   |   |   |   |   |   |   |   |   |   |   |   |   |   |   |   |   |   |   |   |   |   |   |   |   |   |   |   |   |   |   |   |   |   |   |   |   |   |   |   |   |   |   |   |   |   |   |   |   |   |   |   |   |   |   |   |   |   |   |   |   |   |   |   |   |   |   |   |   |   |   |   |   |   |   |   |   |   |   |   |   |   |   |   |   |   |   |   |   |   |   |   |   |   |   |   |   |   |   |   |   |   |   |   |   |   |   |   |   |   |   |   |   |   |   |   |   |   |   |   |   |   |   |   |   |   |   |   |   |   |   |   |   |   |   |   |   |   |   |   |   |   |   |   |   |   |   |   |   |   |   |   |   |   |   |   |   |   |   |   |   |   |   |   |   |   |   |   |   |   |   |   |   |   |   |   |   |   |   |   |   |   |   |   |   |   |   |   |   |   |   |   |   |   |   |   |   |   |   |   |   |   |   |   |   |   |   |   |   |   |   |   |   |   |   |   |   |   |   |   |   |   |   |   |   |   |   |   |   |   |   |   |   |   |   |   |   |   |   |   |   |   |   |   |   |   |   |   |   |   |   |   |   |   |   |   |   |   |   |   |   |   |   |   |   |   |   |   |   |   |   |   |   |   |   |   |   |   |   |   |   |   |   |   |   |   |   |   |   |   |   |   |   |   |   |   |   |   |   |   |   |   |   |   |   |   |   |   |   |   |   |   |   |   |   |   |   |   |   |   |   |   |   |   |   |   |   |   |   |   |   |   |   |   |   |   |   |   |   |   |   |   |   |   |   |   |   |   |   |   |   |   |   |   |   |   |   |   |   |   |   |   |   |   |   |   |   |   |   |   |   |   |   |   |   |   |   |   |   |   |   |   |   |   |   |   |   |   |   |   |   |   |   |   |   |   |   |   |   |   |   |   |   |   |   |   |   |   |   |   |   |   |   |   |   |   |   |   |   |   |   |   |   |   |   |   |   |   |   |   |   |   |   |   |   |   |   |   |   |   |   |   |   |   |   |   |   |   |   |   |   |   |   |   |   |   |   |   |   |   |   |   |   |   |   |   |   |   |   |   |   |   |   |   |   |   |   |   |   |   |   |   |   |   |   |   |   |   |   |   |   |   |   |   |   |   |   |   |   |   |   |   |   |   |   |   |   |   |   |   |   |   |   |   |   |   |   |   |   |   |   |   |   |   |   |   |   |   |   |   |   |   |   |   |   |   |   |   |   |   |   |   |   |   |   |   |   |   |   |   |   |   |   |   |   |   |   |   |   |   |   |   |   |   |   |   |   |   |   |   |   |   |   |   |   |   |   |   |   |   |   |   |   |   |   |   |   |   |   |   |   |   |   |   |   |   |   |   |   |   |   |   |   |   |   |   |   |   |   |   |   |   |   |   |   |   |   |   |   |   |   |   |   |   |   |   |   |   |   |   |   |   |   |   |   |   |   |   |   |   |   |   |   |   |   |   |   |   |   |   |   |   |   |   |   |   |   |   |   |   |   |   |   |   |   |   |   |   |   |   |   |   |   |   |   |   |   |   |   |   |   |   |   |   |   |   |   |   |   |   |   |   |   |   |   |   |   |   |   |   |   |   |   |   |   |   |   |   |   |   |   |   |   |   |   |   |   |   |   |   |   |   |   |   |   |   |   |   |   |   |   |   |   |   |   |   |   |   |
|                        |         |       |       |          |       |        |       |       |       |       |       |         |      |    |       | Section 212 |      |      |         |        |      |    |        |         |    |      |     |       |      |       |       |    |    |       |   |   |   |   |   |   |   |   |   |   |   |   |     |     |   |   |   |   |   |   |   |   |   |   |   |   |   |   |   |   |   |   |   |   |   |   |   |   |   |   |   |   |   |   |   |   |   |   |   |   |   |   |   |   |   |   |   |   |   |   |   |   |   |   |   |   |   |   |   |   |   |   |   |   |   |   |   |   |   |   |   |   |   |   |   |   |   |   |   |   |   |   |   |   |   |   |   |   |   |   |   |   |   |   |   |   |   |   |   |   |   |   |   |   |   |   |   |   |   |   |   |   |   |   |   |   |   |   |   |   |   |   |   |   |   |   |   |   |   |   |   |   |   |   |   |   |   |   |   |   |   |   |   |   |   |   |   |   |   |   |   |   |   |   |   |   |   |   |   |   |   |   |   |   |   |   |   |   |   |   |   |   |   |   |   |   |   |   |   |   |   |   |   |   |   |   |   |   |   |   |   |   |   |   |   |   |   |   |   |   |   |   |   |   |   |   |   |   |   |   |   |   |   |   |   |   |   |   |   |   |   |   |   |   |   |   |   |   |   |   |   |   |   |   |   |   |   |   |   |   |   |   |   |   |   |   |   |   |   |   |   |   |   |   |   |   |   |   |   |   |   |   |   |   |   |   |   |   |   |   |   |   |   |   |   |   |   |   |   |   |   |   |   |   |   |   |   |   |   |   |   |   |   |   |   |   |   |   |   |   |   |   |   |   |   |   |   |   |   |   |   |   |   |   |   |   |   |   |   |   |   |   |   |   |   |   |   |   |   |   |   |   |   |   |   |   |   |   |   |   |   |   |   |   |   |   |   |   |   |   |   |   |   |   |   |   |   |   |   |   |   |   |   |   |   |   |   |   |   |   |   |   |   |   |   |   |   |   |   |   |   |   |   |   |   |   |   |   |   |   |   |   |   |   |   |   |   |   |   |   |   |   |   |   |   |   |   |   |   |   |   |   |   |   |   |   |   |   |   |   |   |   |   |   |   |   |   |   |   |   |   |   |   |   |   |   |   |   |   |   |   |   |   |   |   |   |   |   |   |   |   |   |   |   |   |   |   |   |   |   |   |   |   |   |   |   |   |   |   |   |   |   |   |   |   |   |   |   |   |   |   |   |   |   |   |   |   |   |   |   |   |   |   |   |   |   |   |   |   |   |   |   |   |   |   |   |   |   |   |   |   |   |   |   |   |   |   |   |   |   |   |   |   |   |   |   |   |   |   |   |   |   |   |   |   |   |   |   |   |   |   |   |   |   |   |   |   |   |   |   |   |   |   |   |   |   |   |   |   |   |   |   |   |   |   |   |   |   |   |   |   |   |   |   |   |   |   |   |   |   |   |   |   |   |   |   |   |   |   |   |   |   |   |   |   |   |   |   |   |   |   |   |   |   |   |   |   |   |   |   |   |   |   |   |   |   |   |   |   |   |   |   |   |   |   |   |   |   |   |   |   |   |   |   |   |   |   |   |   |   |   |   |   |   |   |   |   |   |   |   |   |   |   |   |   |   |   |   |   |   |   |   |   |   |   |   |   |   |   |   |   |   |   |   |   |   |   |   |   |   |   |   |   |   |   |   |   |   |   |   |   |   |   |   |   |   |   |   |   |   |   |   |   |   |   |   |   |   |   |   |   |   |   |   |   |   |   |   |   |   |   |   |   |   |   |   |   |   |   |   |   |   |   |   |   |   |   |   |   |   |   |   |   |   |   |   |   |   |   |   |   |   |   |   |   |   |   |   |   |   |   |   |   |   |   |   |   |   |   |   |   |   |   |   |   |   |   |   |   |   |   |   |   |   |   |   |   |   |   |   |   |   |   |   |   |   |   |   |   |   |   |   |   |   |   |   |   |   |   |   |   |   |   |   |   |   |   |   |   |   |   |   |   |   |   |   |   |   |   |   |   |   |   |   |   |   |   |   |   |   |   |   |   |   |   |   |   |   |   |   |   |   |   |   |   |   |   |   |   |   |   |   |   |   |   |   |   |   |   |   |   |   |   |   |   |   |   |   |   |   |   |   |   |   |   |   |   |   |   |   |   |   |   |   |   |   |   |   |   |   |   |   |   |   |   |   |   |   |   |   |   |   |   |   |   |   |   |   |   |   |   |   |   |   |   |   |   |   |   |   |   |   |   |   |   |   |   |   |   |   |   |   |   |   |   |   |   |   |   |   |   |   |   |   |   |   |   |   |   |   |   |   |   |   |   |   |   |   |   |   |   |   |   |   |   |   |   |   |   |   |   |   |   |   |   |   |   |   |   |   |   |   |   |   |   |   |   |   |   |   |   |   |   |   |   |   |   |   |   |   |   |   |   |   |   |   |   |   |   |   |   |   |   |   |   |   |   |   |   |   |   |   |   |   |   |   |   |   |   |   |   |   |   |   |   |   |   |   |   |   |   |   |   |   |   |   |   |   |   |   |   |   |   |   |   |   |   |   |   |   |   |   |   |   |   |   |   |   |   |   |   |   |   |   |   |   |   |   |   |   |   |   |   |
|                        | (20468) | 20468 | 20480 | 20490    | 20500 | 20510  | 20520 | 20530 | 20540 | 20550 | 20564 |         |      |    |       |             |      |      |         |        |      |    |        |         |    |      |     |       |      |       |       |    |    |       |   |   |   |   |   |   |   |   |   |   |   |   |     |     |   |   |   |   |   |   |   |   |   |   |   |   |   |   |   |   |   |   |   |   |   |   |   |   |   |   |   |   |   |   |   |   |   |   |   |   |   |   |   |   |   |   |   |   |   |   |   |   |   |   |   |   |   |   |   |   |   |   |   |   |   |   |   |   |   |   |   |   |   |   |   |   |   |   |   |   |   |   |   |   |   |   |   |   |   |   |   |   |   |   |   |   |   |   |   |   |   |   |   |   |   |   |   |   |   |   |   |   |   |   |   |   |   |   |   |   |   |   |   |   |   |   |   |   |   |   |   |   |   |   |   |   |   |   |   |   |   |   |   |   |   |   |   |   |   |   |   |   |   |   |   |   |   |   |   |   |   |   |   |   |   |   |   |   |   |   |   |   |   |   |   |   |   |   |   |   |   |   |   |   |   |   |   |   |   |   |   |   |   |   |   |   |   |   |   |   |   |   |   |   |   |   |   |   |   |   |   |   |   |   |   |   |   |   |   |   |   |   |   |   |   |   |   |   |   |   |   |   |   |   |   |   |   |   |   |   |   |   |   |   |   |   |   |   |   |   |   |   |   |   |   |   |   |   |   |   |   |   |   |   |   |   |   |   |   |   |   |   |   |   |   |   |   |   |   |   |   |   |   |   |   |   |   |   |   |   |   |   |   |   |   |   |   |   |   |   |   |   |   |   |   |   |   |   |   |   |   |   |   |   |   |   |   |   |   |   |   |   |   |   |   |   |   |   |   |   |   |   |   |   |   |   |   |   |   |   |   |   |   |   |   |   |   |   |   |   |   |   |   |   |   |   |   |   |   |   |   |   |   |   |   |   |   |   |   |   |   |   |   |   |   |   |   |   |   |   |   |   |   |   |   |   |   |   |   |   |   |   |   |   |   |   |   |   |   |   |   |   |   |   |   |   |   |   |   |   |   |   |   |   |   |   |   |   |   |   |   |   |   |   |   |   |   |   |   |   |   |   |   |   |   |   |   |   |   |   |   |   |   |   |   |   |   |   |   |   |   |   |   |   |   |   |   |   |   |   |   |   |   |   |   |   |   |   |   |   |   |   |   |   |   |   |   |   |   |   |   |   |   |   |   |   |   |   |   |   |   |   |   |   |   |   |   |   |   |   |   |   |   |   |   |   |   |   |   |   |   |   |   |   |   |   |   |   |   |   |   |   |   |   |   |   |   |   |   |   |   |   |   |   |   |   |   |   |   |   |   |   |   |   |   |   |   |   |   |   |   |   |   |   |   |   |   |   |   |   |   |   |   |   |   |   |   |   |   |   |   |   |   |   |   |   |   |   |   |   |   |   |   |   |   |   |   |   |   |   |   |   |   |   |   |   |   |   |   |   |   |   |   |   |   |   |   |   |   |   |   |   |   |   |   |   |   |   |   |   |   |   |   |   |   |   |   |   |   |   |   |   |   |   |   |   |   |   |   |   |   |   |   |   |   |   |   |   |   |   |   |   |   |   |   |   |   |   |   |   |   |   |   |   |   |   |   |   |   |   |   |   |   |   |   |   |   |   |   |   |   |   |   |   |   |   |   |   |   |   |   |   |   |   |   |   |   |   |   |   |   |   |   |   |   |   |   |   |   |   |   |   |   |   |   |   |   |   |   |   |   |   |   |   |   |   |   |   |   |   |   |   |   |   |   |   |   |   |   |   |   |   |   |   |   |   |   |   |   |   |   |   |   |   |   |   |   |   |   |   |   |   |   |   |   |   |   |   |   |   |   |   |   |   |   |   |   |   |   |   |   |   |   |   |   |   |   |   |   |   |   |   |   |   |   |   |   |   |   |   |   |   |   |   |   |   |   |   |   |   |   |   |   |   |   |   |   |   |   |   |   |   |   |   |   |   |   |   |   |   |   |   |   |   |   |   |   |   |   |   |   |   |   |   |   |   |   |   |   |   |   |   |   |   |   |   |   |   |   |   |   |   |   |   |   |   |   |   |   |   |   |   |   |   |   |   |   |   |   |   |   |   |   |   |   |   |   |   |   |   |   |   |   |   |   |   |   |   |   |   |   |   |   |   |   |   |   |   |   |   |   |   |   |   |   |   |   |   |   |   |   |   |   |   |   |   |   |   |   |   |   |   |   |   |   |   |   |   |   |   |   |   |   |   |   |   |   |   |   |   |   |   |   |   |   |   |   |   |   |   |   |   |   |   |   |   |   |   |   |   |   |   |   |   |   |   |   |   |   |   |   |   |   |   |   |   |   |   |   |   |   |   |   |   |   |   |   |   |   |   |   |   |   |   |   |   |   |   |   |   |   |   |   |   |   |   |   |   |   |   |   |   |   |   |   |   |   |   |   |   |   |   |   |   |   |   |   |   |   |   |   |   |   |   |   |   |   |   |   |   |   |   |   |   |   |   |   |   |   |   |   |   |   |   |   |   |   |   |   |   |   |   |   |   |   |   |   |   |   |   |   |   |   |   |   |   |   |   |   |   |   |   |   |
| HIV-1 HXB2             | (7119)  | CCCAA | C     | AA       | C     | AA-    | TAC   | AAGA  | AAAA  | GAAT  | C     | CGT     | A    | TC | CAGAG | AG          | GA   | CCAG | GGAGAGC | ATT    | T    | GT | T      | CA      | AT | AG   | GG  | AAAAA | T    | AGG   | AA    | AT | AT | G     | A | C | A | C | A | T |   |   |   |   |   |   |     |     |   |   |   |   |   |   |   |   |   |   |   |   |   |   |   |   |   |   |   |   |   |   |   |   |   |   |   |   |   |   |   |   |   |   |   |   |   |   |   |   |   |   |   |   |   |   |   |   |   |   |   |   |   |   |   |   |   |   |   |   |   |   |   |   |   |   |   |   |   |   |   |   |   |   |   |   |   |   |   |   |   |   |   |   |   |   |   |   |   |   |   |   |   |   |   |   |   |   |   |   |   |   |   |   |   |   |   |   |   |   |   |   |   |   |   |   |   |   |   |   |   |   |   |   |   |   |   |   |   |   |   |   |   |   |   |   |   |   |   |   |   |   |   |   |   |   |   |   |   |   |   |   |   |   |   |   |   |   |   |   |   |   |   |   |   |   |   |   |   |   |   |   |   |   |   |   |   |   |   |   |   |   |   |   |   |   |   |   |   |   |   |   |   |   |   |   |   |   |   |   |   |   |   |   |   |   |   |   |   |   |   |   |   |   |   |   |   |   |   |   |   |   |   |   |   |   |   |   |   |   |   |   |   |   |   |   |   |   |   |   |   |   |   |   |   |   |   |   |   |   |   |   |   |   |   |   |   |   |   |   |   |   |   |   |   |   |   |   |   |   |   |   |   |   |   |   |   |   |   |   |   |   |   |   |   |   |   |   |   |   |   |   |   |   |   |   |   |   |   |   |   |   |   |   |   |   |   |   |   |   |   |   |   |   |   |   |   |   |   |   |   |   |   |   |   |   |   |   |   |   |   |   |   |   |   |   |   |   |   |   |   |   |   |   |   |   |   |   |   |   |   |   |   |   |   |   |   |   |   |   |   |   |   |   |   |   |   |   |   |   |   |   |   |   |   |   |   |   |   |   |   |   |   |   |   |   |   |   |   |   |   |   |   |   |   |   |   |   |   |   |   |   |   |   |   |   |   |   |   |   |   |   |   |   |   |   |   |   |   |   |   |   |   |   |   |   |   |   |   |   |   |   |   |   |   |   |   |   |   |   |   |   |   |   |   |   |   |   |   |   |   |   |   |   |   |   |   |   |   |   |   |   |   |   |   |   |   |   |   |   |   |   |   |   |   |   |   |   |   |   |   |   |   |   |   |   |   |   |   |   |   |   |   |   |   |   |   |   |   |   |   |   |   |   |   |   |   |   |   |   |   |   |   |   |   |   |   |   |   |   |   |   |   |   |   |   |   |   |   |   |   |   |   |   |   |   |   |   |   |   |   |   |   |   |   |   |   |   |   |   |   |   |   |   |   |   |   |   |   |   |   |   |   |   |   |   |   |   |   |   |   |   |   |   |   |   |   |   |   |   |   |   |   |   |   |   |   |   |   |   |   |   |   |   |   |   |   |   |   |   |   |   |   |   |   |   |   |   |   |   |   |   |   |   |   |   |   |   |   |   |   |   |   |   |   |   |   |   |   |   |   |   |   |   |   |   |   |   |   |   |   |   |   |   |   |   |   |   |   |   |   |   |   |   |   |   |   |   |   |   |   |   |   |   |   |   |   |   |   |   |   |   |   |   |   |   |   |   |   |   |   |   |   |   |   |   |   |   |   |   |   |   |   |   |   |   |   |   |   |   |   |   |   |   |   |   |   |   |   |   |   |   |   |   |   |   |   |   |   |   |   |   |   |   |   |   |   |   |   |   |   |   |   |   |   |   |   |   |   |   |   |   |   |   |   |   |   |   |   |   |   |   |   |   |   |   |   |   |   |   |   |   |   |   |   |   |   |   |   |   |   |   |   |   |   |   |   |   |   |   |   |   |   |   |   |   |   |   |   |   |   |   |   |   |   |   |   |   |   |   |   |   |   |   |   |   |   |   |   |   |   |   |   |   |   |   |   |   |   |   |   |   |   |   |   |   |   |   |   |   |   |   |   |   |   |   |   |   |   |   |   |   |   |   |   |   |   |   |   |   |   |   |   |   |   |   |   |   |   |   |   |   |   |   |   |   |   |   |   |   |   |   |   |   |   |   |   |   |   |   |   |   |   |   |   |   |   |   |   |   |   |   |   |   |   |   |   |   |   |   |   |   |   |   |   |   |   |   |   |   |   |   |   |   |   |   |   |   |   |   |   |   |   |   |   |   |   |   |   |   |   |   |   |   |   |   |   |   |   |   |   |   |   |   |   |   |   |   |   |   |   |   |   |   |   |   |   |   |   |   |   |   |   |   |   |   |   |   |   |   |   |   |   |   |   |   |   |   |   |   |   |   |   |   |   |   |   |   |   |   |   |   |   |   |   |   |   |   |   |   |   |   |   |   |   |   |   |   |   |   |   |   |   |   |   |   |   |   |   |   |   |   |   |   |   |   |   |   |   |   |   |   |   |   |   |   |   |   |   |   |   |   |   |   |   |   |   |   |   |   |   |   |   |   |   |   |   |   |   |   |   |   |   |   |   |   |   |   |   |   |   |   |   |   |   |   |   |   |   |   |   |   |   |   |   |   |   |   |   |
| SARS-CoV-2 NC_045512.2 | (19854) | C     | ATTG  | C        | TG    | C      | T     | A     | TAC   | TGTG  | A     | TCT     | G    | GG | A     | C           | TAC  | A    | AA      | GAGAT  | G    | CT | CCAG   | CACATAT | AT | C    | T   | A     | ---  | CT    | AT    | T  | GG | TGTT- | T | G | T | T | C | T | A | T | G | A | C | T | --- | AGC |   |   |   |   |   |   |   |   |   |   |   |   |   |   |   |   |   |   |   |   |   |   |   |   |   |   |   |   |   |   |   |   |   |   |   |   |   |   |   |   |   |   |   |   |   |   |   |   |   |   |   |   |   |   |   |   |   |   |   |   |   |   |   |   |   |   |   |   |   |   |   |   |   |   |   |   |   |   |   |   |   |   |   |   |   |   |   |   |   |   |   |   |   |   |   |   |   |   |   |   |   |   |   |   |   |   |   |   |   |   |   |   |   |   |   |   |   |   |   |   |   |   |   |   |   |   |   |   |   |   |   |   |   |   |   |   |   |   |   |   |   |   |   |   |   |   |   |   |   |   |   |   |   |   |   |   |   |   |   |   |   |   |   |   |   |   |   |   |   |   |   |   |   |   |   |   |   |   |   |   |   |   |   |   |   |   |   |   |   |   |   |   |   |   |   |   |   |   |   |   |   |   |   |   |   |   |   |   |   |   |   |   |   |   |   |   |   |   |   |   |   |   |   |   |   |   |   |   |   |   |   |   |   |   |   |   |   |   |   |   |   |   |   |   |   |   |   |   |   |   |   |   |   |   |   |   |   |   |   |   |   |   |   |   |   |   |   |   |   |   |   |   |   |   |   |   |   |   |   |   |   |   |   |   |   |   |   |   |   |   |   |   |   |   |   |   |   |   |   |   |   |   |   |   |   |   |   |   |   |   |   |   |   |   |   |   |   |   |   |   |   |   |   |   |   |   |   |   |   |   |   |   |   |   |   |   |   |   |   |   |   |   |   |   |   |   |   |   |   |   |   |   |   |   |   |   |   |   |   |   |   |   |   |   |   |   |   |   |   |   |   |   |   |   |   |   |   |   |   |   |   |   |   |   |   |   |   |   |   |   |   |   |   |   |   |   |   |   |   |   |   |   |   |   |   |   |   |   |   |   |   |   |   |   |   |   |   |   |   |   |   |   |   |   |   |   |   |   |   |   |   |   |   |   |   |   |   |   |   |   |   |   |   |   |   |   |   |   |   |   |   |   |   |   |   |   |   |   |   |   |   |   |   |   |   |   |   |   |   |   |   |   |   |   |   |   |   |   |   |   |   |   |   |   |   |   |   |   |   |   |   |   |   |   |   |   |   |   |   |   |   |   |   |   |   |   |   |   |   |   |   |   |   |   |   |   |   |   |   |   |   |   |   |   |   |   |   |   |   |   |   |   |   |   |   |   |   |   |   |   |   |   |   |   |   |   |   |   |   |   |   |   |   |   |   |   |   |   |   |   |   |   |   |   |   |   |   |   |   |   |   |   |   |   |   |   |   |   |   |   |   |   |   |   |   |   |   |   |   |   |   |   |   |   |   |   |   |   |   |   |   |   |   |   |   |   |   |   |   |   |   |   |   |   |   |   |   |   |   |   |   |   |   |   |   |   |   |   |   |   |   |   |   |   |   |   |   |   |   |   |   |   |   |   |   |   |   |   |   |   |   |   |   |   |   |   |   |   |   |   |   |   |   |   |   |   |   |   |   |   |   |   |   |   |   |   |   |   |   |   |   |   |   |   |   |   |   |   |   |   |   |   |   |   |   |   |   |   |   |   |   |   |   |   |   |   |   |   |   |   |   |   |   |   |   |   |   |   |   |   |   |   |   |   |   |   |   |   |   |   |   |   |   |   |   |   |   |   |   |   |   |   |   |   |   |   |   |   |   |   |   |   |   |   |   |   |   |   |   |   |   |   |   |   |   |   |   |   |   |   |   |   |   |   |   |   |   |   |   |   |   |   |   |   |   |   |   |   |   |   |   |   |   |   |   |   |   |   |   |   |   |   |   |   |   |   |   |   |   |   |   |   |   |   |   |   |   |   |   |   |   |   |   |   |   |   |   |   |   |   |   |   |   |   |   |   |   |   |   |   |   |   |   |   |   |   |   |   |   |   |   |   |   |   |   |   |   |   |   |   |   |   |   |   |   |   |   |   |   |   |   |   |   |   |   |   |   |   |   |   |   |   |   |   |   |   |   |   |   |   |   |   |   |   |   |   |   |   |   |   |   |   |   |   |   |   |   |   |   |   |   |   |   |   |   |   |   |   |   |   |   |   |   |   |   |   |   |   |   |   |   |   |   |   |   |   |   |   |   |   |   |   |   |   |   |   |   |   |   |   |   |   |   |   |   |   |   |   |   |   |   |   |   |   |   |   |   |   |   |   |   |   |   |   |   |   |   |   |   |   |   |   |   |   |   |   |   |   |   |   |   |   |   |   |   |   |   |   |   |   |   |   |   |   |   |   |   |   |   |   |   |   |   |   |   |   |   |   |   |   |   |   |   |   |   |   |   |   |   |   |   |   |   |   |   |   |   |   |   |   |   |   |   |   |   |   |   |   |   |   |   |   |   |   |   |   |   |   |   |   |   |   |   |   |   |   |   |   |   |   |   |   |   |   |   |   |   |   |   |   |   |   |   |   |   |   |   |   |   |
|                        |         |       |       |          |       |        |       |       |       |       |       |         |      |    |       | Section 213 |      |      |         |        |      |    |        |         |    |      |     |       |      |       |       |    |    |       |   |   |   |   |   |   |   |   |   |   |   |   |     |     |   |   |   |   |   |   |   |   |   |   |   |   |   |   |   |   |   |   |   |   |   |   |   |   |   |   |   |   |   |   |   |   |   |   |   |   |   |   |   |   |   |   |   |   |   |   |   |   |   |   |   |   |   |   |   |   |   |   |   |   |   |   |   |   |   |   |   |   |   |   |   |   |   |   |   |   |   |   |   |   |   |   |   |   |   |   |   |   |   |   |   |   |   |   |   |   |   |   |   |   |   |   |   |   |   |   |   |   |   |   |   |   |   |   |   |   |   |   |   |   |   |   |   |   |   |   |   |   |   |   |   |   |   |   |   |   |   |   |   |   |   |   |   |   |   |   |   |   |   |   |   |   |   |   |   |   |   |   |   |   |   |   |   |   |   |   |   |   |   |   |   |   |   |   |   |   |   |   |   |   |   |   |   |   |   |   |   |   |   |   |   |   |   |   |   |   |   |   |   |   |   |   |   |   |   |   |   |   |   |   |   |   |   |   |   |   |   |   |   |   |   |   |   |   |   |   |   |   |   |   |   |   |   |   |   |   |   |   |   |   |   |   |   |   |   |   |   |   |   |   |   |   |   |   |   |   |   |   |   |   |   |   |   |   |   |   |   |   |   |   |   |   |   |   |   |   |   |   |   |   |   |   |   |   |   |   |   |   |   |   |   |   |   |   |   |   |   |   |   |   |   |   |   |   |   |   |   |   |   |   |   |   |   |   |   |   |   |   |   |   |   |   |   |   |   |   |   |   |   |   |   |   |   |   |   |   |   |   |   |   |   |   |   |   |   |   |   |   |   |   |   |   |   |   |   |   |   |   |   |   |   |   |   |   |   |   |   |   |   |   |   |   |   |   |   |   |   |   |   |   |   |   |   |   |   |   |   |   |   |   |   |   |   |   |   |   |   |   |   |   |   |   |   |   |   |   |   |   |   |   |   |   |   |   |   |   |   |   |   |   |   |   |   |   |   |   |   |   |   |   |   |   |   |   |   |   |   |   |   |   |   |   |   |   |   |   |   |   |   |   |   |   |   |   |   |   |   |   |   |   |   |   |   |   |   |   |   |   |   |   |   |   |   |   |   |   |   |   |   |   |   |   |   |   |   |   |   |   |   |   |   |   |   |   |   |   |   |   |   |   |   |   |   |   |   |   |   |   |   |   |   |   |   |   |   |   |   |   |   |   |   |   |   |   |   |   |   |   |   |   |   |   |   |   |   |   |   |   |   |   |   |   |   |   |   |   |   |   |   |   |   |   |   |   |   |   |   |   |   |   |   |   |   |   |   |   |   |   |   |   |   |   |   |   |   |   |   |   |   |   |   |   |   |   |   |   |   |   |   |   |   |   |   |   |   |   |   |   |   |   |   |   |   |   |   |   |   |   |   |   |   |   |   |   |   |   |   |   |   |   |   |   |   |   |   |   |   |   |   |   |   |   |   |   |   |   |   |   |   |   |   |   |   |   |   |   |   |   |   |   |   |   |   |   |   |   |   |   |   |   |   |   |   |   |   |   |   |   |   |   |   |   |   |   |   |   |   |   |   |   |   |   |   |   |   |   |   |   |   |   |   |   |   |   |   |   |   |   |   |   |   |   |   |   |   |   |   |   |   |   |   |   |   |   |   |   |   |   |   |   |   |   |   |   |   |   |   |   |   |   |   |   |   |   |   |   |   |   |   |   |   |   |   |   |   |   |   |   |   |   |   |   |   |   |   |   |   |   |   |   |   |   |   |   |   |   |   |   |   |   |   |   |   |   |   |   |   |   |   |   |   |   |   |   |   |   |   |   |   |   |   |   |   |   |   |   |   |   |   |   |   |   |   |   |   |   |   |   |   |   |   |   |   |   |   |   |   |   |   |   |   |   |   |   |   |   |   |   |   |   |   |   |   |   |   |   |   |   |   |   |   |   |   |   |   |   |   |   |   |   |   |   |   |   |   |   |   |   |   |   |   |   |   |   |   |   |   |   |   |   |   |   |   |   |   |   |   |   |   |   |   |   |   |   |   |   |   |   |   |   |   |   |   |   |   |   |   |   |   |   |   |   |   |   |   |   |   |   |   |   |   |   |   |   |   |   |   |   |   |   |   |   |   |   |   |   |   |   |   |   |   |   |   |   |   |   |   |   |   |   |   |   |   |   |   |   |   |   |   |   |   |   |   |   |   |   |   |   |   |   |   |   |   |   |   |   |   |   |   |   |   |   |   |   |   |   |   |   |   |   |   |   |   |   |   |   |   |   |   |   |   |   |   |   |   |   |   |   |   |   |   |   |   |   |   |   |   |   |   |   |   |   |   |   |   |   |   |   |   |   |   |   |   |   |   |   |   |   |   |   |   |   |   |   |   |   |   |   |   |   |   |   |   |   |   |   |   |   |   |   |   |   |   |   |   |   |   |   |   |   |   |   |   |   |   |   |   |   |   |   |   |   |   |   |   |   |   |   |   |   |   |   |   |   |   |   |   |   |   |
|                        | (20565) | 20565 | 20570 | 20580    | 20590 | 20600  | 20610 | 20620 | 20630 | 20640 | 20650 | 20661   |      |    |       |             |      |      |         |        |      |    |        |         |    |      |     |       |      |       |       |    |    |       |   |   |   |   |   |   |   |   |   |   |   |   |     |     |   |   |   |   |   |   |   |   |   |   |   |   |   |   |   |   |   |   |   |   |   |   |   |   |   |   |   |   |   |   |   |   |   |   |   |   |   |   |   |   |   |   |   |   |   |   |   |   |   |   |   |   |   |   |   |   |   |   |   |   |   |   |   |   |   |   |   |   |   |   |   |   |   |   |   |   |   |   |   |   |   |   |   |   |   |   |   |   |   |   |   |   |   |   |   |   |   |   |   |   |   |   |   |   |   |   |   |   |   |   |   |   |   |   |   |   |   |   |   |   |   |   |   |   |   |   |   |   |   |   |   |   |   |   |   |   |   |   |   |   |   |   |   |   |   |   |   |   |   |   |   |   |   |   |   |   |   |   |   |   |   |   |   |   |   |   |   |   |   |   |   |   |   |   |   |   |   |   |   |   |   |   |   |   |   |   |   |   |   |   |   |   |   |   |   |   |   |   |   |   |   |   |   |   |   |   |   |   |   |   |   |   |   |   |   |   |   |   |   |   |   |   |   |   |   |   |   |   |   |   |   |   |   |   |   |   |   |   |   |   |   |   |   |   |   |   |   |   |   |   |   |   |   |   |   |   |   |   |   |   |   |   |   |   |   |   |   |   |   |   |   |   |   |   |   |   |   |   |   |   |   |   |   |   |   |   |   |   |   |   |   |   |   |   |   |   |   |   |   |   |   |   |   |   |   |   |   |   |   |   |   |   |   |   |   |   |   |   |   |   |   |   |   |   |   |   |   |   |   |   |   |   |   |   |   |   |   |   |   |   |   |   |   |   |   |   |   |   |   |   |   |   |   |   |   |   |   |   |   |   |   |   |   |   |   |   |   |   |   |   |   |   |   |   |   |   |   |   |   |   |   |   |   |   |   |   |   |   |   |   |   |   |   |   |   |   |   |   |   |   |   |   |   |   |   |   |   |   |   |   |   |   |   |   |   |   |   |   |   |   |   |   |   |   |   |   |   |   |   |   |   |   |   |   |   |   |   |   |   |   |   |   |   |   |   |   |   |   |   |   |   |   |   |   |   |   |   |   |   |   |   |   |   |   |   |   |   |   |   |   |   |   |   |   |   |   |   |   |   |   |   |   |   |   |   |   |   |   |   |   |   |   |   |   |   |   |   |   |   |   |   |   |   |   |   |   |   |   |   |   |   |   |   |   |   |   |   |   |   |   |   |   |   |   |   |   |   |   |   |   |   |   |   |   |   |   |   |   |   |   |   |   |   |   |   |   |   |   |   |   |   |   |   |   |   |   |   |   |   |   |   |   |   |   |   |   |   |   |   |   |   |   |   |   |   |   |   |   |   |   |   |   |   |   |   |   |   |   |   |   |   |   |   |   |   |   |   |   |   |   |   |   |   |   |   |   |   |   |   |   |   |   |   |   |   |   |   |   |   |   |   |   |   |   |   |   |   |   |   |   |   |   |   |   |   |   |   |   |   |   |   |   |   |   |   |   |   |   |   |   |   |   |   |   |   |   |   |   |   |   |   |   |   |   |   |   |   |   |   |   |   |   |   |   |   |   |   |   |   |   |   |   |   |   |   |   |   |   |   |   |   |   |   |   |   |   |   |   |   |   |   |   |   |   |   |   |   |   |   |   |   |   |   |   |   |   |   |   |   |   |   |   |   |   |   |   |   |   |   |   |   |   |   |   |   |   |   |   |   |   |   |   |   |   |   |   |   |   |   |   |   |   |   |   |   |   |   |   |   |   |   |   |   |   |   |   |   |   |   |   |   |   |   |   |   |   |   |   |   |   |   |   |   |   |   |   |   |   |   |   |   |   |   |   |   |   |   |   |   |   |   |   |   |   |   |   |   |   |   |   |   |   |   |   |   |   |   |   |   |   |   |   |   |   |   |   |   |   |   |   |   |   |   |   |   |   |   |   |   |   |   |   |   |   |   |   |   |   |   |   |   |   |   |   |   |   |   |   |   |   |   |   |   |   |   |   |   |   |   |   |   |   |   |   |   |   |   |   |   |   |   |   |   |   |   |   |   |   |   |   |   |   |   |   |   |   |   |   |   |   |   |   |   |   |   |   |   |   |   |   |   |   |   |   |   |   |   |   |   |   |   |   |   |   |   |   |   |   |   |   |   |   |   |   |   |   |   |   |   |   |   |   |   |   |   |   |   |   |   |   |   |   |   |   |   |   |   |   |   |   |   |   |   |   |   |   |   |   |   |   |   |   |   |   |   |   |   |   |   |   |   |   |   |   |   |   |   |   |   |   |   |   |   |   |   |   |   |   |   |   |   |   |   |   |   |   |   |   |   |   |   |   |   |   |   |   |   |   |   |   |   |   |   |   |   |   |   |   |   |   |   |   |   |   |   |   |   |   |   |   |   |   |   |   |   |   |   |   |   |   |   |   |   |   |   |   |   |   |   |   |   |   |   |   |   |   |   |   |   |   |   |   |   |   |   |   |   |   |   |   |   |   |   |   |   |   |   |   |   |
| HIV-1 HXB2             | (7215)  | TGTA  | A     | C        | ATT   | AGTA   | GAG   | CAAA  | AA    | TG    | GAAT  | AA      | C    | A  | C     | A           | C    | T    | T       | T      | AAAA | C  | A      | G       | A  | T    | A   | G     | C    | T     | A     | G  | C  | A     | A | A | T | T | A | A | A | A | A | A | A | A | A   | A   | A | A | A | A | A | A | A | A | A | A | A | A | A | A | A | A | A | A | A | A | A | A | A | A | A | A | A | A | A | A | A | A | A | A | A | A | A | A | A | A | A | A | A | A | A | A | A | A | A | A | A | A | A | A | A | A | A | A | A | A | A | A | A | A | A | A | A | A | A | A | A | A | A | A | A | A | A | A | A | A | A | A | A | A | A | A | A | A | A | A | A | A | A | A | A | A | A | A | A | A | A | A | A | A | A | A | A | A | A | A | A | A | A | A | A | A | A | A | A | A | A | A | A | A | A | A | A | A | A | A | A | A | A | A | A | A | A | A | A | A | A | A | A | A | A | A | A | A | A | A | A | A | A | A | A | A | A | A | A | A | A | A | A | A | A | A | A | A | A | A | A | A | A | A | A | A | A | A | A | A | A | A | A | A | A | A | A | A | A | A | A | A | A | A | A | A | A | A | A | A | A | A | A | A | A | A | A | A | A | A | A | A | A | A | A | A | A | A | A | A | A | A | A | A | A | A | A | A | A | A | A | A | A | A | A | A | A | A | A | A | A | A | A | A | A | A | A | A | A | A | A | A | A | A | A | A | A | A | A | A | A | A | A | A | A | A | A | A | A | A | A | A | A | A | A | A | A | A | A | A | A | A | A | A | A | A | A | A | A | A | A | A | A | A | A | A | A | A | A | A | A | A | A | A | A | A | A | A | A | A | A | A | A | A | A | A | A | A | A | A | A | A | A | A | A | A | A | A | A | A | A | A | A | A | A | A | A | A | A | A | A | A | A | A | A | A | A | A | A | A | A | A | A | A | A | A | A | A | A | A | A | A | A | A | A | A | A | A | A | A | A | A | A | A | A | A | A | A | A | A | A | A | A | A | A | A | A | A | A | A | A | A | A | A | A | A | A | A | A | A | A | A | A | A | A | A | A | A | A | A | A | A | A | A | A | A | A | A | A | A | A | A | A | A | A | A | A | A | A | A | A | A | A | A | A | A | A | A | A | A | A | A | A | A | A | A | A | A | A | A | A | A | A | A | A | A | A | A | A | A | A | A | A | A | A | A | A | A | A | A | A | A | A | A | A | A | A | A | A | A | A | A | A | A | A | A | A | A | A | A | A | A | A | A | A | A | A | A | A | A | A | A | A | A | A | A | A | A | A | A | A | A | A | A | A | A | A | A | A | A | A | A | A | A | A | A | A | A | A | A | A | A | A | A | A | A | A | A | A | A | A | A | A | A | A | A | A | A | A | A | A | A | A | A | A | A | A | A | A | A | A | A | A | A | A | A | A | A | A | A | A | A | A | A | A | A | A | A | A | A | A | A | A | A | A | A | A | A | A | A | A | A | A | A | A | A | A | A | A | A | A | A | A | A | A | A | A | A | A | A | A | A | A | A | A | A | A | A | A | A | A | A | A | A | A | A | A | A | A | A | A | A | A | A | A | A | A | A | A | A | A | A | A | A | A | A | A | A | A | A | A | A | A | A | A | A | A | A | A | A | A | A | A | A | A | A | A | A | A | A | A | A | A | A | A | A | A | A | A | A | A | A | A | A | A | A | A | A | A | A | A | A | A | A | A | A | A | A | A | A | A | A | A | A | A | A | A | A | A | A | A | A | A | A | A | A | A | A | A | A | A | A | A | A | A | A | A | A | A | A | A | A | A | A | A | A | A | A | A | A | A | A | A | A | A | A | A | A | A | A | A | A | A | A | A | A | A | A | A | A | A | A | A | A | A | A | A | A | A | A | A | A | A | A | A | A | A | A | A | A | A | A | A | A | A | A | A | A | A | A | A | A | A | A | A | A | A | A | A | A | A | A | A | A | A | A | A | A | A | A | A | A | A | A | A | A | A | A | A | A | A | A | A | A | A | A | A | A | A | A | A | A | A | A | A | A | A | A | A | A | A | A | A | A | A | A | A | A | A | A | A | A | A | A | A | A | A | A | A | A | A | A | A | A | A | A | A | A | A | A | A | A | A | A | A | A | A | A | A | A | A | A | A | A | A | A | A | A | A | A | A | A | A | A | A | A | A | A | A | A | A | A | A | A | A | A | A | A | A | A | A | A | A | A | A | A | A | A | A | A | A | A | A | A | A | A | A | A | A | A | A | A | A | A | A | A | A | A | A | A | A | A | A | A | A | A | A | A | A | A | A | A | A | A | A | A | A | A | A | A | A | A | A | A | A | A | A | A | A | A | A | A | A | A | A | A | A | A | A | A | A | A | A | A | A | A | A | A | A | A | A | A | A | A | A | A | A | A | A | A | A | A | A | A | A | A | A | A | A | A | A | A | A | A | A | A | A | A | A | A | A | A | A | A | A | A | A | A | A | A | A | A | A | A | A | A | A | A | A | A | A | A | A | A | A | A | A | A | A | A | A | A | A | A | A | A | A | A | A | A | A | A | A | A | A | A | A | A | A | A | A | A | A | A | A | A | A | A | A | A | A | A | A | A | A | A | A | A | A |

SARS-CoV-2 & HIV-1.apr

<



SARS-CoV-2 & HIV-1.apr

|                                |         |             |                 |              |               |              |              |              |            |              |                   |
|--------------------------------|---------|-------------|-----------------|--------------|---------------|--------------|--------------|--------------|------------|--------------|-------------------|
|                                |         |             |                 |              |               |              |              |              |            |              | Section 225       |
|                                | (21729) | 21729       | 21740           | 21750        | 21760         | 21770        | 21780        | 21790        | 21800      | 21810        | 21825             |
| HIV-1 HXB2 (8355)              |         | GGATATTCA   | CATT-ATCGTT     | TCAGACC      | CACCTCCCA     | CCCGAGGGG    | ACCCGACAGGC  | CCGAAGGA     | AT-AGAAGA  | AGAAGGTGG    | AGAGAGACAG        |
| SARS-CoV-2 NC_045512.2 (20977) |         | GCAATTCA    | ACTTTGATTGGT    | GATTGTG      | CAACTGTACA    | TAGAGCTAAT   | AATGGGATCT   | CATTATTAGT   | GATATGTACG | ACCCTAAGA    | CTAAATG           |
|                                |         |             |                 |              |               |              |              |              |            |              | Section 226       |
|                                | (21826) | 21826       | 21840           | 21850        | 21860         | 21870        | 21880        | 21890        | 21900      | 21910        | 21922             |
| HIV-1 HXB2 (8450)              |         | AGACAGATCC  | A-TTCGATTAGTG   | AACGATCC     | TTGGCACTTA    | TC           | TGGGACGATCT  | TGCGGAGC     | CT---GTGC  | CTCTTCAGCT   | ACCACC            |
| SARS-CoV-2 NC_045512.2 (21074) |         | TTACAAAGA   | AAATGACTCTA--   | AAAGGGTT     | TTTCACTTA     | CATTTGTGGT   | TTTATAC      | AAACAAAAGCTA | GC         | TCTTGGAGGTT  | CCGTGGCTAT        |
|                                |         |             |                 |              |               |              |              |              |            |              | Section 227       |
|                                | (21923) | 21923       | 21930           | 21940        | 21950         | 21960        | 21970        | 21980        | 21990      | 22000        | 22019             |
| HIV-1 HXB2 (8542)              |         | ACTTACT--   | CTTGATTGTAA     | CAGGAT-TGTGG | AA-CTTC       | TGGGAC       | GCAGGGGGT    | TGGGAAGCCCT  | CAAATA     | TTGGTGGGA    | ATCTCCT           |
| SARS-CoV-2 NC_045512.2 (21169) |         | ATAACAGAA   | CATTC           | TTGGAATGCT   | GATCTTTAT     | AAAGCTCA     | TGGGACACTTC  | GCA          | T---GGT    | GGA          | CAGCTTTG          |
|                                |         |             |                 |              |               |              |              |              |            |              | Section 228       |
|                                | (22020) | 22020       | 22030           | 22040        | 22050         | 22060        | 22070        | 22080        | 22090      | 22100        | 22116             |
| HIV-1 HXB2 (8635)              |         | GTCA        | GGAACTAA        | AAGAA        | TAGTGTCTGT    | TTAGCTTGCTCA | ATGCCACAGC   | CATAGCA      | GTAGCTGAG  | GGGACAGATAG  | GGTTATAGA         |
| SARS-CoV-2 NC_045512.2 (21255) |         | GTCA        | TCACTGA         | AAGCATTTT    | TA-ATTGG----- | ATGTAA       | TTATCTTTG    | GCA          | AACCACGCG  | GAACAATA     | GATGGTTATGT       |
|                                |         |             |                 |              |               |              |              |              |            |              | Section 229       |
|                                | (22117) | 22117       | 22130           | 22140        | 22150         | 22160        | 22170        | 22180        | 22190      | 22200        | 22213             |
| HIV-1 HXB2 (8732)              |         | TTGTAGAGCTA | TTGCCACATACCTAG | AAGAA        | TAAAGACAGG    | GCTTGGAAAGG  | -ATTTTGC     | TATAA        | GATGGGTGGC | AAAGTGGT     | CAAAAGT           |
| SARS-CoV-2 NC_045512.2 (21339) |         | TTACATAT--- | TTTGGAGGA       | AA-----T     | ACAAATCCAA    | ATTCAGTTG    | -TCTTCCT     | ATTCT-T      | TATTTGACAT | GAGTAAAT     | TTCCCTTT          |
|                                |         |             |                 |              |               |              |              |              |            |              | Section 230       |
|                                | (22214) | 22214       | 22220           | 22230        | 22240         | 22250        | 22260        | 22270        | 22280      | 22290        | 22300             |
| HIV-1 HXB2 (8828)              |         | TTGGATG     | GC-C            | TAC          | TGT           | AAGGG        | AAAGAA       | TGAGAC       | GAG-C      | TGAGCCAGC    | AGCAGATAGGG       |
| SARS-CoV-2 NC_045512.2 (21425) |         | --GTACTGC   | TGTTAT          | TGTC         | TTTA          | AAAGAA       | G            | TCA          | AATCAA     | TGATATG----- | ATTTTATCTCTTCT    |
|                                |         |             |                 |              |               |              |              |              |            |              | Section 231       |
|                                | (22311) | 22311       | 22320           | 22330        | 22340         | 22350        | 22360        | 22370        | 22380      | 22390        | 22407             |
| HIV-1 HXB2 (8923)              |         | ATCACA      | AGTAG-CA        | ATACAGCAG    | CTACC---      | AATGCTG      | --CTTGT      | GCCTGG       | CTAGAA     | G            | CACAGAGGAGGAGGAGG |
| SARS-CoV-2 NC_045512.2 (21503) |         | T           | TAGAGA--AAA     | CAACAGAG     | TTGTAT        | TTTCTAG      | TGATGTTCTTGT | TAACAACT--   | AAACGAA    | CAATGT----   | T---TGT           |

## SARS-CoV-2 &amp; HIV-1.apr

[illegible]

## SARS-CoV-2 &amp; HIV-1.apr

|                        |         |                                                                                                     |                       |                       |                       |                       |                       |                       |                       |                       |                                             |
|------------------------|---------|-----------------------------------------------------------------------------------------------------|-----------------------|-----------------------|-----------------------|-----------------------|-----------------------|-----------------------|-----------------------|-----------------------|---------------------------------------------|
|                        |         |                                                                                                     |                       |                       |                       |                       |                       |                       |                       |                       | Section 239                                 |
|                        | (23087) | <a href="#">23087</a>                                                                               | <a href="#">23100</a> | <a href="#">23110</a> | <a href="#">23120</a> | <a href="#">23130</a> | <a href="#">23140</a> | <a href="#">23150</a> | <a href="#">23160</a> | <a href="#">23170</a> | <a href="#">23183</a>                       |
| HIV-1 HXB2             | (9688)  | -----ACCCTTTAGTCAG---TGTGGAAATCTCTAGCA-----                                                         |                       |                       |                       |                       |                       |                       |                       |                       |                                             |
| SARS-CoV-2 NC_045512.2 | (22119) | TCAAATAATCTTAGGGAATTGTGT-TAAGAAATGATGGTTATTTTAAATATATTCTAAGCACACGCCTATTAATTTAGTGCCTGATCTCCCTC       |                       |                       |                       |                       |                       |                       |                       |                       |                                             |
|                        |         |                                                                                                     |                       |                       |                       |                       |                       |                       |                       |                       | Section 240                                 |
|                        | (23184) | <a href="#">23184</a>                                                                               | <a href="#">23190</a> | <a href="#">23200</a> | <a href="#">23210</a> | <a href="#">23220</a> | <a href="#">23230</a> | <a href="#">23240</a> | <a href="#">23250</a> | <a href="#">23260</a> | <a href="#">23270</a> <a href="#">23280</a> |
| HIV-1 HXB2             | (9720)  | -----                                                                                               |                       |                       |                       |                       |                       |                       |                       |                       |                                             |
| SARS-CoV-2 NC_045512.2 | (22215) | AGGGTTTTTCGGCTTTAGAACCATTTGGTAGATTTGCCAATAGGTATTAACATCACTAGGTTTCAAACCTTTACTTGCTTTACATAGAAGTTATTTGAC |                       |                       |                       |                       |                       |                       |                       |                       |                                             |
|                        |         |                                                                                                     |                       |                       |                       |                       |                       |                       |                       |                       | Section 241                                 |
|                        | (23281) | <a href="#">23281</a>                                                                               | <a href="#">23290</a> | <a href="#">23300</a> | <a href="#">23310</a> | <a href="#">23320</a> | <a href="#">23330</a> | <a href="#">23340</a> | <a href="#">23350</a> | <a href="#">23360</a> | <a href="#">23377</a>                       |
| HIV-1 HXB2             | (9720)  | -----                                                                                               |                       |                       |                       |                       |                       |                       |                       |                       |                                             |
| SARS-CoV-2 NC_045512.2 | (22312) | TCCTGGTGATTCTTCTTCAGGTTGGACAGCTGGTGCTGCAGCTTATTATGTGGGTTATCTTCAACCTAGGACTTTTCTATTAAATATAATGAAAAT    |                       |                       |                       |                       |                       |                       |                       |                       |                                             |
|                        |         |                                                                                                     |                       |                       |                       |                       |                       |                       |                       |                       | Section 242                                 |
|                        | (23378) | <a href="#">23378</a>                                                                               | <a href="#">23390</a> | <a href="#">23400</a> | <a href="#">23410</a> | <a href="#">23420</a> | <a href="#">23430</a> | <a href="#">23440</a> | <a href="#">23450</a> | <a href="#">23460</a> | <a href="#">23474</a>                       |
| HIV-1 HXB2             | (9720)  | -----                                                                                               |                       |                       |                       |                       |                       |                       |                       |                       |                                             |
| SARS-CoV-2 NC_045512.2 | (22409) | GGAACCATTACAGATGCTGTAGACTGTGCACTTGACCCTCTCTCAGAAACAAAGTGACGTTGAAATCCTTCACTGTAGAAAAAGGAATCTATCAAA    |                       |                       |                       |                       |                       |                       |                       |                       |                                             |
|                        |         |                                                                                                     |                       |                       |                       |                       |                       |                       |                       |                       | Section 243                                 |
|                        | (23475) | <a href="#">23475</a> <a href="#">23480</a>                                                         | <a href="#">23490</a> | <a href="#">23500</a> | <a href="#">23510</a> | <a href="#">23520</a> | <a href="#">23530</a> | <a href="#">23540</a> | <a href="#">23550</a> | <a href="#">23560</a> | <a href="#">23571</a>                       |
| HIV-1 HXB2             | (9720)  | -----                                                                                               |                       |                       |                       |                       |                       |                       |                       |                       |                                             |
| SARS-CoV-2 NC_045512.2 | (22506) | CTTCTAACTTTAGAGTCCAACCAACAGAATCTATTGTTAGATTTTCTAATATTACAAACTTGTCCTTTTGGTGAAGTTTTTAACGCCACCAGATT     |                       |                       |                       |                       |                       |                       |                       |                       |                                             |
|                        |         |                                                                                                     |                       |                       |                       |                       |                       |                       |                       |                       | Section 244                                 |
|                        | (23572) | <a href="#">23572</a>                                                                               | <a href="#">23580</a> | <a href="#">23590</a> | <a href="#">23600</a> | <a href="#">23610</a> | <a href="#">23620</a> | <a href="#">23630</a> | <a href="#">23640</a> | <a href="#">23650</a> | <a href="#">23668</a>                       |
| HIV-1 HXB2             | (9720)  | -----                                                                                               |                       |                       |                       |                       |                       |                       |                       |                       |                                             |
| SARS-CoV-2 NC_045512.2 | (22603) | TGCATCTGTTTATGCTTGGAACAGGAAGAGAATCAGCAACTGTGTTGCTGATTATTCTGTCCTATATAAATTCGCATCATTTTCCACTTTTAAAGTGT  |                       |                       |                       |                       |                       |                       |                       |                       |                                             |
|                        |         |                                                                                                     |                       |                       |                       |                       |                       |                       |                       |                       | Section 245                                 |
|                        | (23669) | <a href="#">23669</a>                                                                               | <a href="#">23680</a> | <a href="#">23690</a> | <a href="#">23700</a> | <a href="#">23710</a> | <a href="#">23720</a> | <a href="#">23730</a> | <a href="#">23740</a> | <a href="#">23750</a> | <a href="#">23765</a>                       |
| HIV-1 HXB2             | (9720)  | -----                                                                                               |                       |                       |                       |                       |                       |                       |                       |                       |                                             |
| SARS-CoV-2 NC_045512.2 | (22700) | TATGGAGTGCTCCTACTAAATTAAATGATCTCTGCTTTACTAATGTCTATGCAGATTCATTTGTAATTAGAGGTGATGAAGTCAGACAAATCGCTC    |                       |                       |                       |                       |                       |                       |                       |                       |                                             |

## SARS-CoV-2 &amp; HIV-1.apr

|                        |         |                                                                                                     |                       |                       |                       |                       |                       |                       |                       |                       |                       |                       |
|------------------------|---------|-----------------------------------------------------------------------------------------------------|-----------------------|-----------------------|-----------------------|-----------------------|-----------------------|-----------------------|-----------------------|-----------------------|-----------------------|-----------------------|
|                        |         |                                                                                                     |                       |                       |                       |                       |                       |                       |                       |                       | Section 246           |                       |
|                        | (23766) | <a href="#">23766</a>                                                                               | <a href="#">23780</a> | <a href="#">23790</a> | <a href="#">23800</a> | <a href="#">23810</a> | <a href="#">23820</a> | <a href="#">23830</a> | <a href="#">23840</a> | <a href="#">23850</a> | <a href="#">23862</a> |                       |
| HIV-1 HXB2             | (9720)  | -----                                                                                               |                       |                       |                       |                       |                       |                       |                       |                       |                       |                       |
| SARS-CoV-2 NC_045512.2 | (22797) | CAGGGCAAACCTGGAAAGATTGCTGATTATAATTATAAAATTACCAGATGATTTTACAGGCTGCGTTATAGCTTGGAATTCTAACAATCTTGATTCTAA |                       |                       |                       |                       |                       |                       |                       |                       |                       |                       |
|                        |         |                                                                                                     |                       |                       |                       |                       |                       |                       |                       |                       | Section 247           |                       |
|                        | (23863) | <a href="#">23863</a>                                                                               | <a href="#">23870</a> | <a href="#">23880</a> | <a href="#">23890</a> | <a href="#">23900</a> | <a href="#">23910</a> | <a href="#">23920</a> | <a href="#">23930</a> | <a href="#">23940</a> | <a href="#">23959</a> |                       |
| HIV-1 HXB2             | (9720)  | -----                                                                                               |                       |                       |                       |                       |                       |                       |                       |                       |                       |                       |
| SARS-CoV-2 NC_045512.2 | (22894) | GGTTGGTGGTAATTATAATTACCTGTATAGATTGTTTAGGAAGTCTAATCTCAAACCTTTTGAGAGAGATATTTCAACTGAAATCTATCAGGCCGGT   |                       |                       |                       |                       |                       |                       |                       |                       |                       |                       |
|                        |         |                                                                                                     |                       |                       |                       |                       |                       |                       |                       |                       | Section 248           |                       |
|                        | (23960) | <a href="#">23960</a>                                                                               | <a href="#">23970</a> | <a href="#">23980</a> | <a href="#">23990</a> | <a href="#">24000</a> | <a href="#">24010</a> | <a href="#">24020</a> | <a href="#">24030</a> | <a href="#">24040</a> | <a href="#">24056</a> |                       |
| HIV-1 HXB2             | (9720)  | -----                                                                                               |                       |                       |                       |                       |                       |                       |                       |                       |                       |                       |
| SARS-CoV-2 NC_045512.2 | (22991) | AGCACACCTTGTAATGGTGTGGAAGGTTTTAATTGTTACTTTCTTTACAATCATATGGTTTCCAACCCACTAATGGTGTGGTTACCAACCATACA     |                       |                       |                       |                       |                       |                       |                       |                       |                       |                       |
|                        |         |                                                                                                     |                       |                       |                       |                       |                       |                       |                       |                       | Section 249           |                       |
|                        | (24057) | <a href="#">24057</a>                                                                               | <a href="#">24070</a> | <a href="#">24080</a> | <a href="#">24090</a> | <a href="#">24100</a> | <a href="#">24110</a> | <a href="#">24120</a> | <a href="#">24130</a> | <a href="#">24140</a> | <a href="#">24153</a> |                       |
| HIV-1 HXB2             | (9720)  | -----                                                                                               |                       |                       |                       |                       |                       |                       |                       |                       |                       |                       |
| SARS-CoV-2 NC_045512.2 | (23088) | GAGTAGTAGTACTTTCTTTTGAACCTTCTACATGCACCAGCAACTGTTTGTGGACCTAAAAAGTCTACTAATTTGGTTAAAAACAAATGTGTCAATTT  |                       |                       |                       |                       |                       |                       |                       |                       |                       |                       |
|                        |         |                                                                                                     |                       |                       |                       |                       |                       |                       |                       |                       | Section 250           |                       |
|                        | (24154) | <a href="#">24154</a>                                                                               | <a href="#">24160</a> | <a href="#">24170</a> | <a href="#">24180</a> | <a href="#">24190</a> | <a href="#">24200</a> | <a href="#">24210</a> | <a href="#">24220</a> | <a href="#">24230</a> | <a href="#">24240</a> | <a href="#">24250</a> |
| HIV-1 HXB2             | (9720)  | -----                                                                                               |                       |                       |                       |                       |                       |                       |                       |                       |                       |                       |
| SARS-CoV-2 NC_045512.2 | (23185) | CAACTTCAATGGTTTAAACAGGCACAGGTGTTCTTACTGAGTCTAACAAAAAGTTTCTGCCTTTCCAACAATTTGGCAGAGACATTGCTGACACTACT  |                       |                       |                       |                       |                       |                       |                       |                       |                       |                       |
|                        |         |                                                                                                     |                       |                       |                       |                       |                       |                       |                       |                       | Section 251           |                       |
|                        | (24251) | <a href="#">24251</a>                                                                               | <a href="#">24260</a> | <a href="#">24270</a> | <a href="#">24280</a> | <a href="#">24290</a> | <a href="#">24300</a> | <a href="#">24310</a> | <a href="#">24320</a> | <a href="#">24330</a> | <a href="#">24347</a> |                       |
| HIV-1 HXB2             | (9720)  | -----                                                                                               |                       |                       |                       |                       |                       |                       |                       |                       |                       |                       |
| SARS-CoV-2 NC_045512.2 | (23282) | GATGCTGTCCGTGATCCACAGACACTTGAGATTCTTGACATTACACCATGTTCTTTTGGTGGTGTGTCAGTGTTATAACACCAGGAACAAATACTTCTA |                       |                       |                       |                       |                       |                       |                       |                       |                       |                       |
|                        |         |                                                                                                     |                       |                       |                       |                       |                       |                       |                       |                       | Section 252           |                       |
|                        | (24348) | <a href="#">24348</a>                                                                               | <a href="#">24360</a> | <a href="#">24370</a> | <a href="#">24380</a> | <a href="#">24390</a> | <a href="#">24400</a> | <a href="#">24410</a> | <a href="#">24420</a> | <a href="#">24430</a> | <a href="#">24444</a> |                       |
| HIV-1 HXB2             | (9720)  | -----                                                                                               |                       |                       |                       |                       |                       |                       |                       |                       |                       |                       |
| SARS-CoV-2 NC_045512.2 | (23379) | ACCAGGTTGCTGTTCTTTATCAGGATGTAACTGCACAGAAGTCCCTGTTGCTATTTCATGCAGATCAACTTACTCCTACTTGGCGTGTTTATTCTAC   |                       |                       |                       |                       |                       |                       |                       |                       |                       |                       |

SARS-CoV-2 & HIV-1.apr

|                        |         |                                                                                                    |       |       |       |       |       |       |       |       |             |       |
|------------------------|---------|----------------------------------------------------------------------------------------------------|-------|-------|-------|-------|-------|-------|-------|-------|-------------|-------|
|                        |         |                                                                                                    |       |       |       |       |       |       |       |       | Section 253 |       |
|                        | (24445) | 24445                                                                                              | 24450 | 24460 | 24470 | 24480 | 24490 | 24500 | 24510 | 24520 | 24530       | 24541 |
| HIV-1 HXB2             | (9720)  | -----                                                                                              |       |       |       |       |       |       |       |       |             |       |
| SARS-CoV-2 NC_045512.2 | (23476) | AGGTTCTAATGTTTTTCAAACACGTGCAGGCTGTTTAATAGGGGCTGAACATGTCAACAACATCATATGAGTGTGACATACCCATTGGTGCAGGTATA |       |       |       |       |       |       |       |       |             |       |
|                        |         |                                                                                                    |       |       |       |       |       |       |       |       | Section 254 |       |
|                        | (24542) | 24542                                                                                              | 24550 | 24560 | 24570 | 24580 | 24590 | 24600 | 24610 | 24620 |             | 24638 |
| HIV-1 HXB2             | (9720)  | -----                                                                                              |       |       |       |       |       |       |       |       |             |       |
| SARS-CoV-2 NC_045512.2 | (23573) | TGCGCTAGTTATCAGACTCAGACTAATTCTCCTCGGCGGGCACGTAGTGTAGCTAGTCAATCCATCATTGCCTACACTATGTCACTTGGTGCAGAAA  |       |       |       |       |       |       |       |       |             |       |
|                        |         |                                                                                                    |       |       |       |       |       |       |       |       | Section 255 |       |
|                        | (24639) | 24639                                                                                              | 24650 | 24660 | 24670 | 24680 | 24690 | 24700 | 24710 | 24720 |             | 24735 |
| HIV-1 HXB2             | (9720)  | -----                                                                                              |       |       |       |       |       |       |       |       |             |       |
| SARS-CoV-2 NC_045512.2 | (23670) | ATTCAGTTGCTTACTCTAATAACTCTATTGCCATACCCACAAATTTTACTATTAGTGTTACCACAGAAATTCTACCAGTGTCTATGACCAAGACATC  |       |       |       |       |       |       |       |       |             |       |
|                        |         |                                                                                                    |       |       |       |       |       |       |       |       | Section 256 |       |
|                        | (24736) | 24736                                                                                              | 24750 | 24760 | 24770 | 24780 | 24790 | 24800 | 24810 | 24820 |             | 24832 |
| HIV-1 HXB2             | (9720)  | -----                                                                                              |       |       |       |       |       |       |       |       |             |       |
| SARS-CoV-2 NC_045512.2 | (23767) | AGTAGATTGTACAATGTACATTTGTGGTGATTCAACTGAATGCAGCAATCTTTTGTGCAATATGGCAGTTTTTGTACACAATTAACCGTGCTTTA    |       |       |       |       |       |       |       |       |             |       |
|                        |         |                                                                                                    |       |       |       |       |       |       |       |       | Section 257 |       |
|                        | (24833) | 24833                                                                                              | 24840 | 24850 | 24860 | 24870 | 24880 | 24890 | 24900 | 24910 |             | 24929 |
| HIV-1 HXB2             | (9720)  | -----                                                                                              |       |       |       |       |       |       |       |       |             |       |
| SARS-CoV-2 NC_045512.2 | (23864) | ACTGGAATAGCTGTTGAACAAGACAAAAACACCCAAGAAGTTTTTGCACAAGTCAAACAAATTTACAAAACACCACCAATTAAAGATTTTGGTGGTT  |       |       |       |       |       |       |       |       |             |       |
|                        |         |                                                                                                    |       |       |       |       |       |       |       |       | Section 258 |       |
|                        | (24930) | 24930                                                                                              | 24940 | 24950 | 24960 | 24970 | 24980 | 24990 | 25000 | 25010 |             | 25026 |
| HIV-1 HXB2             | (9720)  | -----                                                                                              |       |       |       |       |       |       |       |       |             |       |
| SARS-CoV-2 NC_045512.2 | (23961) | TTAATTTTTTCACAAATATTACCAGATCCATCAAAACCAAGCAAGAGGTCATTTATTGAAGATCTACTTTTCAACAAAGTGACACTTGCAGATGCTGG |       |       |       |       |       |       |       |       |             |       |
|                        |         |                                                                                                    |       |       |       |       |       |       |       |       | Section 259 |       |
|                        | (25027) | 25027                                                                                              | 25040 | 25050 | 25060 | 25070 | 25080 | 25090 | 25100 | 25110 |             | 25123 |
| HIV-1 HXB2             | (9720)  | -----                                                                                              |       |       |       |       |       |       |       |       |             |       |
| SARS-CoV-2 NC_045512.2 | (24058) | CTTCATCAAACAATATGGTGATTGCCTTGGTGATATTGCTGCTAGAGACCTCATTTGTGCACAAAAGTTTAACGGCCTTACTGTTTTGCCACCTTTG  |       |       |       |       |       |       |       |       |             |       |

## SARS-CoV-2 &amp; HIV-1.apr

|                        |         |                                                                                                     |                       |                       |                       |                       |                       |                       |                       |                       |                                             |
|------------------------|---------|-----------------------------------------------------------------------------------------------------|-----------------------|-----------------------|-----------------------|-----------------------|-----------------------|-----------------------|-----------------------|-----------------------|---------------------------------------------|
|                        |         |                                                                                                     |                       |                       |                       |                       |                       |                       |                       |                       | Section 260                                 |
|                        | (25124) | <a href="#">25124</a>                                                                               | <a href="#">25130</a> | <a href="#">25140</a> | <a href="#">25150</a> | <a href="#">25160</a> | <a href="#">25170</a> | <a href="#">25180</a> | <a href="#">25190</a> | <a href="#">25200</a> | <a href="#">25210</a> <a href="#">25220</a> |
| HIV-1 HXB2             | (9720)  | -----                                                                                               |                       |                       |                       |                       |                       |                       |                       |                       |                                             |
| SARS-CoV-2 NC_045512.2 | (24155) | CTCAGATGAAATGATTGCTCAATACACTTCTGCACTGTTAGCGGGTACAATCACTTCTGGTTGGACCTTTGGTGCAGGTGCTGCATTACAAATAC     |                       |                       |                       |                       |                       |                       |                       |                       |                                             |
|                        |         |                                                                                                     |                       |                       |                       |                       |                       |                       |                       |                       | Section 261                                 |
|                        | (25221) | <a href="#">25221</a>                                                                               | <a href="#">25230</a> | <a href="#">25240</a> | <a href="#">25250</a> | <a href="#">25260</a> | <a href="#">25270</a> | <a href="#">25280</a> | <a href="#">25290</a> | <a href="#">25300</a> | <a href="#">25317</a>                       |
| HIV-1 HXB2             | (9720)  | -----                                                                                               |                       |                       |                       |                       |                       |                       |                       |                       |                                             |
| SARS-CoV-2 NC_045512.2 | (24252) | CATTGCTATGCAAATGGCTTATAGGTTAATGGTATTGGAGTTACACAGAATGTTCTCTATGAGAACCACAAAATTGATTGCCAACCAATTTAATAG    |                       |                       |                       |                       |                       |                       |                       |                       |                                             |
|                        |         |                                                                                                     |                       |                       |                       |                       |                       |                       |                       |                       | Section 262                                 |
|                        | (25318) | <a href="#">25318</a>                                                                               | <a href="#">25330</a> | <a href="#">25340</a> | <a href="#">25350</a> | <a href="#">25360</a> | <a href="#">25370</a> | <a href="#">25380</a> | <a href="#">25390</a> | <a href="#">25400</a> | <a href="#">25414</a>                       |
| HIV-1 HXB2             | (9720)  | -----                                                                                               |                       |                       |                       |                       |                       |                       |                       |                       |                                             |
| SARS-CoV-2 NC_045512.2 | (24349) | TGCTATTGGCAAAATTCAAGACTCACTTTCTTCCACAGCAAGTGCACCTTGGAAAACTTCAAGATGTGGTCAACCAAAATGCACAAGCTTTAAACACG  |                       |                       |                       |                       |                       |                       |                       |                       |                                             |
|                        |         |                                                                                                     |                       |                       |                       |                       |                       |                       |                       |                       | Section 263                                 |
|                        | (25415) | <a href="#">25415</a>                                                                               | <a href="#">25420</a> | <a href="#">25430</a> | <a href="#">25440</a> | <a href="#">25450</a> | <a href="#">25460</a> | <a href="#">25470</a> | <a href="#">25480</a> | <a href="#">25490</a> | <a href="#">25500</a> <a href="#">25511</a> |
| HIV-1 HXB2             | (9720)  | -----                                                                                               |                       |                       |                       |                       |                       |                       |                       |                       |                                             |
| SARS-CoV-2 NC_045512.2 | (24446) | CTTGTTAAACAACCTTAGCTCCAATTTTGGTGCAATTTCAAGTGTTTTAAATGATATCCTTTTCACGTCTTGACAAAGTTGAGGCTGAAGTGCAAATTG |                       |                       |                       |                       |                       |                       |                       |                       |                                             |
|                        |         |                                                                                                     |                       |                       |                       |                       |                       |                       |                       |                       | Section 264                                 |
|                        | (25512) | <a href="#">25512</a>                                                                               | <a href="#">25520</a> | <a href="#">25530</a> | <a href="#">25540</a> | <a href="#">25550</a> | <a href="#">25560</a> | <a href="#">25570</a> | <a href="#">25580</a> | <a href="#">25590</a> | <a href="#">25608</a>                       |
| HIV-1 HXB2             | (9720)  | -----                                                                                               |                       |                       |                       |                       |                       |                       |                       |                       |                                             |
| SARS-CoV-2 NC_045512.2 | (24543) | ATAGGTTGATCACAGGCAGACTTCAAAGTTTGCAGACATATGTGACTCAACAATTAATTAGAGCTGCAGAAATCAGAGCTTCTGCTAATCTTGCTGC   |                       |                       |                       |                       |                       |                       |                       |                       |                                             |
|                        |         |                                                                                                     |                       |                       |                       |                       |                       |                       |                       |                       | Section 265                                 |
|                        | (25609) | <a href="#">25609</a>                                                                               | <a href="#">25620</a> | <a href="#">25630</a> | <a href="#">25640</a> | <a href="#">25650</a> | <a href="#">25660</a> | <a href="#">25670</a> | <a href="#">25680</a> | <a href="#">25690</a> | <a href="#">25705</a>                       |
| HIV-1 HXB2             | (9720)  | -----                                                                                               |                       |                       |                       |                       |                       |                       |                       |                       |                                             |
| SARS-CoV-2 NC_045512.2 | (24640) | TACTAAAATGTCAGAGTGTGTACTTGGACAATCAAAAAGAGTTGATTTTTGTGGAAAGGGCTATCATCTTATGTCCTTCCCTCAGTCAGCACCTCAT   |                       |                       |                       |                       |                       |                       |                       |                       |                                             |
|                        |         |                                                                                                     |                       |                       |                       |                       |                       |                       |                       |                       | Section 266                                 |
|                        | (25706) | <a href="#">25706</a>                                                                               | <a href="#">25720</a> | <a href="#">25730</a> | <a href="#">25740</a> | <a href="#">25750</a> | <a href="#">25760</a> | <a href="#">25770</a> | <a href="#">25780</a> | <a href="#">25790</a> | <a href="#">25802</a>                       |
| HIV-1 HXB2             | (9720)  | -----                                                                                               |                       |                       |                       |                       |                       |                       |                       |                       |                                             |
| SARS-CoV-2 NC_045512.2 | (24737) | GGTGTAGTCTTCTTGCATGTGACTTATGTCCCTGCACAAGAAAAGAACTTCACAACCTGCTCCTGCCATTTGTCATGATGGAAAAGCACACTTTCCTC  |                       |                       |                       |                       |                       |                       |                       |                       |                                             |

## SARS-CoV-2 &amp; HIV-1.apr

|                        |         |                                                                                                    |       |       |       |       |       |       |       |       |             |
|------------------------|---------|----------------------------------------------------------------------------------------------------|-------|-------|-------|-------|-------|-------|-------|-------|-------------|
|                        |         |                                                                                                    |       |       |       |       |       |       |       |       | Section 267 |
|                        | (25803) | 25803                                                                                              | 25810 | 25820 | 25830 | 25840 | 25850 | 25860 | 25870 | 25880 | 25899       |
| HIV-1 HXB2             | (9720)  | -----                                                                                              |       |       |       |       |       |       |       |       |             |
| SARS-CoV-2 NC_045512.2 | (24834) | GTGAAGGTGTCTTTGTTTCAAATGGCACACACTGGTTTGTAAACACAAAGGAATTTTATGAACCACAAATCATTACTACAGACAACACATTTGTGTC  |       |       |       |       |       |       |       |       |             |
|                        |         |                                                                                                    |       |       |       |       |       |       |       |       | Section 268 |
|                        | (25900) | 25900                                                                                              | 25910 | 25920 | 25930 | 25940 | 25950 | 25960 | 25970 | 25980 | 25996       |
| HIV-1 HXB2             | (9720)  | -----                                                                                              |       |       |       |       |       |       |       |       |             |
| SARS-CoV-2 NC_045512.2 | (24931) | TGGTAACTGTGATGTTGTAATAGGAATTGTCAACAACACAGTTTATGATCCTTTGCAACCTGAATTAGACTCATTCAAGGAGGAGTTAGATAAATAT  |       |       |       |       |       |       |       |       |             |
|                        |         |                                                                                                    |       |       |       |       |       |       |       |       | Section 269 |
|                        | (25997) | 25997                                                                                              | 26010 | 26020 | 26030 | 26040 | 26050 | 26060 | 26070 | 26080 | 26093       |
| HIV-1 HXB2             | (9720)  | -----                                                                                              |       |       |       |       |       |       |       |       |             |
| SARS-CoV-2 NC_045512.2 | (25028) | TTTAAGAATCATACATCACCAGATGTTGATTTAGGTGACATCTCTGGCATTAATGCTTCAGTTGTAAACATTCAAAAAGAAATTGACCGCCTCAATG  |       |       |       |       |       |       |       |       |             |
|                        |         |                                                                                                    |       |       |       |       |       |       |       |       | Section 270 |
|                        | (26094) | 26094                                                                                              | 26100 | 26110 | 26120 | 26130 | 26140 | 26150 | 26160 | 26170 | 26180 26190 |
| HIV-1 HXB2             | (9720)  | -----                                                                                              |       |       |       |       |       |       |       |       |             |
| SARS-CoV-2 NC_045512.2 | (25125) | AGGTTGCCAAGAATTTAAATGAATCTCTCATCGATCTCCAAGAACTTGGAAAGTATGAGCAGTATATAAAATGGCCATGGTACATTTGGCTAGGTTT  |       |       |       |       |       |       |       |       |             |
|                        |         |                                                                                                    |       |       |       |       |       |       |       |       | Section 271 |
|                        | (26191) | 26191                                                                                              | 26200 | 26210 | 26220 | 26230 | 26240 | 26250 | 26260 | 26270 | 26287       |
| HIV-1 HXB2             | (9720)  | -----                                                                                              |       |       |       |       |       |       |       |       |             |
| SARS-CoV-2 NC_045512.2 | (25222) | TATAGCTGGCTTGATTGCCATAGTAATGGTGACAATTATGCTTTGCTGTATGACCAGTTGCTGTAGTTGTCTCAAGGGCTGTTGTTCTTGTGGATCC  |       |       |       |       |       |       |       |       |             |
|                        |         |                                                                                                    |       |       |       |       |       |       |       |       | Section 272 |
|                        | (26288) | 26288                                                                                              | 26300 | 26310 | 26320 | 26330 | 26340 | 26350 | 26360 | 26370 | 26384       |
| HIV-1 HXB2             | (9720)  | -----                                                                                              |       |       |       |       |       |       |       |       |             |
| SARS-CoV-2 NC_045512.2 | (25319) | TGCTGCAAATTTGATGAAGACGACTCTGAGCCAGTGCTCAAAGGAGTCAAATTACATTACACATAAACGAACCTTATGGATTTGTTTATGAGAATCTT |       |       |       |       |       |       |       |       |             |
|                        |         |                                                                                                    |       |       |       |       |       |       |       |       | Section 273 |
|                        | (26385) | 26385                                                                                              | 26390 | 26400 | 26410 | 26420 | 26430 | 26440 | 26450 | 26460 | 26470 26481 |
| HIV-1 HXB2             | (9720)  | -----                                                                                              |       |       |       |       |       |       |       |       |             |
| SARS-CoV-2 NC_045512.2 | (25416) | CACAATTGGAACTGTAACCTTTGAAGCAAGGTGAAATCAAGGATGCTACTCCTTCAGATTTTGTTCGCGCTACTGCAACGATACCGATACAAGCCTCA |       |       |       |       |       |       |       |       |             |

## SARS-CoV-2 &amp; HIV-1.apr

|                        |         |                                                                                                    |       |       |       |       |       |       |       |       |             |
|------------------------|---------|----------------------------------------------------------------------------------------------------|-------|-------|-------|-------|-------|-------|-------|-------|-------------|
|                        |         |                                                                                                    |       |       |       |       |       |       |       |       | Section 274 |
|                        | (26482) | 26482                                                                                              | 26490 | 26500 | 26510 | 26520 | 26530 | 26540 | 26550 | 26560 | 26578       |
| HIV-1 HXB2             | (9720)  | -----                                                                                              |       |       |       |       |       |       |       |       |             |
| SARS-CoV-2 NC_045512.2 | (25513) | CTCCCTTTTCGGATGGCTTATTGTTGGCGTTGCACTTCTTGCTGTTTTTCAGAGCGCTTCCAAAATCATAACCCTCAAAAAGAGATGGCAACTAGCAC |       |       |       |       |       |       |       |       |             |
|                        |         |                                                                                                    |       |       |       |       |       |       |       |       | Section 275 |
|                        | (26579) | 26579                                                                                              | 26590 | 26600 | 26610 | 26620 | 26630 | 26640 | 26650 | 26660 | 26675       |
| HIV-1 HXB2             | (9720)  | -----                                                                                              |       |       |       |       |       |       |       |       |             |
| SARS-CoV-2 NC_045512.2 | (25610) | TCTCCAAGGGTGTTCACTTTGTTGCAACTTGCTGTTGTTGTTGTAACAGTTTACTCACACCTTTTGCTCGTTGCTGCTGGCCTTGAAGCCCCTTT    |       |       |       |       |       |       |       |       |             |
|                        |         |                                                                                                    |       |       |       |       |       |       |       |       | Section 276 |
|                        | (26676) | 26676                                                                                              | 26690 | 26700 | 26710 | 26720 | 26730 | 26740 | 26750 | 26760 | 26772       |
| HIV-1 HXB2             | (9720)  | -----                                                                                              |       |       |       |       |       |       |       |       |             |
| SARS-CoV-2 NC_045512.2 | (25707) | TCTCTATCTTTATGCTTTAGTCTACTTCTTGCAAGTATAAACTTTGTAAGAATAATAATGAGGCTTTGGCTTTGCTGGAAATGCCGTTCCAAAAAC   |       |       |       |       |       |       |       |       |             |
|                        |         |                                                                                                    |       |       |       |       |       |       |       |       | Section 277 |
|                        | (26773) | 26773                                                                                              | 26780 | 26790 | 26800 | 26810 | 26820 | 26830 | 26840 | 26850 | 26869       |
| HIV-1 HXB2             | (9720)  | -----                                                                                              |       |       |       |       |       |       |       |       |             |
| SARS-CoV-2 NC_045512.2 | (25804) | CCATTACTTTATGATGCCAACTATTTTCTTTGCTGGCATACTAATTGTTACGACTATTGTATACCTTACAATAGTGTAACCTTCTTCAATTGTCATTA |       |       |       |       |       |       |       |       |             |
|                        |         |                                                                                                    |       |       |       |       |       |       |       |       | Section 278 |
|                        | (26870) | 26870                                                                                              | 26880 | 26890 | 26900 | 26910 | 26920 | 26930 | 26940 | 26950 | 26966       |
| HIV-1 HXB2             | (9720)  | -----                                                                                              |       |       |       |       |       |       |       |       |             |
| SARS-CoV-2 NC_045512.2 | (25901) | CTTCAGGTGATGGCACAACAAGTCCTATTTCTGAACATGACTACCAGATTGGTGGTTATACTGAAAAATGGGAATCTGGAGTAAAAGACTGTGTTGT  |       |       |       |       |       |       |       |       |             |
|                        |         |                                                                                                    |       |       |       |       |       |       |       |       | Section 279 |
|                        | (26967) | 26967                                                                                              | 26980 | 26990 | 27000 | 27010 | 27020 | 27030 | 27040 | 27050 | 27063       |
| HIV-1 HXB2             | (9720)  | -----                                                                                              |       |       |       |       |       |       |       |       |             |
| SARS-CoV-2 NC_045512.2 | (25998) | ATTACACAGTTACTTCACTTCAGACTATTACCAGCTGTACTCAACTCAATTGAGTACAGACACTGGTGTGTAACATGTTACCTTCTTCATCTACAAT  |       |       |       |       |       |       |       |       |             |
|                        |         |                                                                                                    |       |       |       |       |       |       |       |       | Section 280 |
|                        | (27064) | 27064                                                                                              | 27070 | 27080 | 27090 | 27100 | 27110 | 27120 | 27130 | 27140 | 27150 27160 |
| HIV-1 HXB2             | (9720)  | -----                                                                                              |       |       |       |       |       |       |       |       |             |
| SARS-CoV-2 NC_045512.2 | (26095) | AAAATTGTTGATGAGCCTGAAGAACATGTCCAAATTCACACAATCGACGGTTCATCCGGAGTTGTTAATCCAGTAATGGAACCAATTTATGATGAAC  |       |       |       |       |       |       |       |       |             |



## SARS-CoV-2 &amp; HIV-1.apr

|                        |         |                                                                                                     |       |       |       |       |       |       |       |       |             |       |
|------------------------|---------|-----------------------------------------------------------------------------------------------------|-------|-------|-------|-------|-------|-------|-------|-------|-------------|-------|
|                        |         |                                                                                                     |       |       |       |       |       |       |       |       | Section 281 |       |
|                        | (27161) | 27161                                                                                               | 27170 | 27180 | 27190 | 27200 | 27210 | 27220 | 27230 | 27240 | 27257       |       |
| HIV-1 HXB2             | (9720)  | -----                                                                                               |       |       |       |       |       |       |       |       |             |       |
| SARS-CoV-2 NC_045512.2 | (26192) | CGACGACGACTACTAGCGTGCCTTTGTAAGCACAAAGCTGATGAGTACGAACTTATGTACTCATTTCGTTTCGGAAGAGACAGGTACGTTAATAGTTAA |       |       |       |       |       |       |       |       |             |       |
|                        |         |                                                                                                     |       |       |       |       |       |       |       |       | Section 282 |       |
|                        | (27258) | 27258                                                                                               | 27270 | 27280 | 27290 | 27300 | 27310 | 27320 | 27330 | 27340 | 27354       |       |
| HIV-1 HXB2             | (9720)  | -----                                                                                               |       |       |       |       |       |       |       |       |             |       |
| SARS-CoV-2 NC_045512.2 | (26289) | TAGCGTACTTCTTTTTCTTGCTTTCGTGGTATTCTTGCTAGTTACACTAGCCATCCTTACTGCGCTTCGATTGTGTGCGTACTGCTGCAATATTGTT   |       |       |       |       |       |       |       |       |             |       |
|                        |         |                                                                                                     |       |       |       |       |       |       |       |       | Section 283 |       |
|                        | (27355) | 27355                                                                                               | 27360 | 27370 | 27380 | 27390 | 27400 | 27410 | 27420 | 27430 | 27440       | 27451 |
| HIV-1 HXB2             | (9720)  | -----                                                                                               |       |       |       |       |       |       |       |       |             |       |
| SARS-CoV-2 NC_045512.2 | (26386) | AACGTGAGTCTTGTAACCTTCTTTTTACGTTTACTCTCGTGTTAAAAATCTGAATTCTTCTAGAGTTTCTGATCTTCTGGTCTAAACGAACTAAA     |       |       |       |       |       |       |       |       |             |       |
|                        |         |                                                                                                     |       |       |       |       |       |       |       |       | Section 284 |       |
|                        | (27452) | 27452                                                                                               | 27460 | 27470 | 27480 | 27490 | 27500 | 27510 | 27520 | 27530 | 27548       |       |
| HIV-1 HXB2             | (9720)  | -----                                                                                               |       |       |       |       |       |       |       |       |             |       |
| SARS-CoV-2 NC_045512.2 | (26483) | TATTATATTAGTTTTCTGTTTGGAACCTTTAATTTTAGCCATGGCAGATTCCAACGGTACTATTACCGTTGAAGAGCTTAAAAAGCTCCTTGAACAA   |       |       |       |       |       |       |       |       |             |       |
|                        |         |                                                                                                     |       |       |       |       |       |       |       |       | Section 285 |       |
|                        | (27549) | 27549                                                                                               | 27560 | 27570 | 27580 | 27590 | 27600 | 27610 | 27620 | 27630 | 27645       |       |
| HIV-1 HXB2             | (9720)  | -----                                                                                               |       |       |       |       |       |       |       |       |             |       |
| SARS-CoV-2 NC_045512.2 | (26580) | TGGAACCTAGTAATAGGTTTCCTATTCCTTACATGGATTTGTCTTCTACAATTTGCCTATGCCAACAGGAATAGGTTTTTGTATATAATTAAGTTAA   |       |       |       |       |       |       |       |       |             |       |
|                        |         |                                                                                                     |       |       |       |       |       |       |       |       | Section 286 |       |
|                        | (27646) | 27646                                                                                               | 27660 | 27670 | 27680 | 27690 | 27700 | 27710 | 27720 | 27730 | 27742       |       |
| HIV-1 HXB2             | (9720)  | -----                                                                                               |       |       |       |       |       |       |       |       |             |       |
| SARS-CoV-2 NC_045512.2 | (26677) | TTTTCTCTGGCTGTTATGGCCAGTAACCTTAGCTTGTTTTGTGCTTGCTGCTGTTTACAGAATAAATTGGATCACCGGTGGAATTGCTATCGCAAT    |       |       |       |       |       |       |       |       |             |       |
|                        |         |                                                                                                     |       |       |       |       |       |       |       |       | Section 287 |       |
|                        | (27743) | 27743                                                                                               | 27750 | 27760 | 27770 | 27780 | 27790 | 27800 | 27810 | 27820 | 27839       |       |
| HIV-1 HXB2             | (9720)  | -----                                                                                               |       |       |       |       |       |       |       |       |             |       |
| SARS-CoV-2 NC_045512.2 | (26774) | GGCTTGCTTGTAGGCTTGATGTGGCTCAGCTACTTCATTGCTTCTTTCAGACTGTTTGCGCGTACGCGTTCCATGTGGTCATTCAATCCAGAACT     |       |       |       |       |       |       |       |       |             |       |

## SARS-CoV-2 &amp; HIV-1.apr

|                        |         |                                                                                                    |       |       |       |       |       |       |       |       |             |
|------------------------|---------|----------------------------------------------------------------------------------------------------|-------|-------|-------|-------|-------|-------|-------|-------|-------------|
|                        |         |                                                                                                    |       |       |       |       |       |       |       |       | Section 288 |
|                        | (27840) | 27840                                                                                              | 27850 | 27860 | 27870 | 27880 | 27890 | 27900 | 27910 | 27920 | 27936       |
| HIV-1 HXB2             | (9720)  | -----                                                                                              |       |       |       |       |       |       |       |       |             |
| SARS-CoV-2 NC_045512.2 | (26871) | AACATTCTTCTCAACGTGCCACTCCATGGCACTATTCTGACCAGACCGCTTCTAGAAAGTGAACCTCGTAATCGGAGCTGTGATCCTTCGTGGACATC |       |       |       |       |       |       |       |       |             |
|                        |         |                                                                                                    |       |       |       |       |       |       |       |       | Section 289 |
|                        | (27937) | 27937                                                                                              | 27950 | 27960 | 27970 | 27980 | 27990 | 28000 | 28010 | 28020 | 28033       |
| HIV-1 HXB2             | (9720)  | -----                                                                                              |       |       |       |       |       |       |       |       |             |
| SARS-CoV-2 NC_045512.2 | (26968) | TTCGTATTGCTGGACACCATCTAGGACGCTGTGACATCAAGGACCTGCCTAAAGAAATCACTGTTGCTACATCACGAACGCTTTCTTATTACAAATT  |       |       |       |       |       |       |       |       |             |
|                        |         |                                                                                                    |       |       |       |       |       |       |       |       | Section 290 |
|                        | (28034) | 28034                                                                                              | 28040 | 28050 | 28060 | 28070 | 28080 | 28090 | 28100 | 28110 | 28120 28130 |
| HIV-1 HXB2             | (9720)  | -----                                                                                              |       |       |       |       |       |       |       |       |             |
| SARS-CoV-2 NC_045512.2 | (27065) | GGGAGCTTCGCAGCGTGTAGCAGGTGACTCAGGTTTTGCTGCATACAGTCGCTACAGGATTGGCAACTATAAATTAAACACAGACCATTCCAGTAGC  |       |       |       |       |       |       |       |       |             |
|                        |         |                                                                                                    |       |       |       |       |       |       |       |       | Section 291 |
|                        | (28131) | 28131                                                                                              | 28140 | 28150 | 28160 | 28170 | 28180 | 28190 | 28200 | 28210 | 28227       |
| HIV-1 HXB2             | (9720)  | -----                                                                                              |       |       |       |       |       |       |       |       |             |
| SARS-CoV-2 NC_045512.2 | (27162) | AGTGACAATATTGCTTTGCTTGTACAGTAAGTGACAACAGATGTTTCATCTCGTTGACTTTTCAGGTTACTATAGCAGAGATATTACTAATTATTATG |       |       |       |       |       |       |       |       |             |
|                        |         |                                                                                                    |       |       |       |       |       |       |       |       | Section 292 |
|                        | (28228) | 28228                                                                                              | 28240 | 28250 | 28260 | 28270 | 28280 | 28290 | 28300 | 28310 | 28324       |
| HIV-1 HXB2             | (9720)  | -----                                                                                              |       |       |       |       |       |       |       |       |             |
| SARS-CoV-2 NC_045512.2 | (27259) | AGGACTTTTAAAGTTTCCATTTGGAATCTTGATTACATCATAAACCTCATAATTAAAAATTTATCTAAGTCACTAACTGAGAATAAATATTCTCAAT  |       |       |       |       |       |       |       |       |             |
|                        |         |                                                                                                    |       |       |       |       |       |       |       |       | Section 293 |
|                        | (28325) | 28325                                                                                              | 28330 | 28340 | 28350 | 28360 | 28370 | 28380 | 28390 | 28400 | 28410 28421 |
| HIV-1 HXB2             | (9720)  | -----                                                                                              |       |       |       |       |       |       |       |       |             |
| SARS-CoV-2 NC_045512.2 | (27356) | TAGATGAAGAGCAACCAATGGAGATTGATTAAACGAACATGAAAATTATTCTTTTCTTGGCACTGATAACACTCGCTACTTGTGAGCTTTATCACTA  |       |       |       |       |       |       |       |       |             |
|                        |         |                                                                                                    |       |       |       |       |       |       |       |       | Section 294 |
|                        | (28422) | 28422                                                                                              | 28430 | 28440 | 28450 | 28460 | 28470 | 28480 | 28490 | 28500 | 28518       |
| HIV-1 HXB2             | (9720)  | -----                                                                                              |       |       |       |       |       |       |       |       |             |
| SARS-CoV-2 NC_045512.2 | (27453) | CCAAGAGTGTTAGAGGTACAACAGTACTTTTAAAGAACCTTGCTCTTCTGGAACATACGAGGGCAATTCACCATTTTCATCCTCTAGCTGATAAC    |       |       |       |       |       |       |       |       |             |

## SARS-CoV-2 &amp; HIV-1.apr

|                        |         |                                                                                                     |       |       |       |       |       |       |       |       |             |
|------------------------|---------|-----------------------------------------------------------------------------------------------------|-------|-------|-------|-------|-------|-------|-------|-------|-------------|
|                        |         |                                                                                                     |       |       |       |       |       |       |       |       | Section 295 |
|                        | (28519) | 28519                                                                                               | 28530 | 28540 | 28550 | 28560 | 28570 | 28580 | 28590 | 28600 | 28615       |
| HIV-1 HXB2             | (9720)  | -----                                                                                               |       |       |       |       |       |       |       |       |             |
| SARS-CoV-2 NC_045512.2 | (27550) | AAATTTGCACTGACTTGCTTTAGCACTCAATTTGCTTTTGCTTGCTCTGACGGCGTAAAACACGTCTATCAGTTACGTGCCAGATCAGTTTACCTA    |       |       |       |       |       |       |       |       |             |
|                        |         |                                                                                                     |       |       |       |       |       |       |       |       | Section 296 |
|                        | (28616) | 28616                                                                                               | 28630 | 28640 | 28650 | 28660 | 28670 | 28680 | 28690 | 28700 | 28712       |
| HIV-1 HXB2             | (9720)  | -----                                                                                               |       |       |       |       |       |       |       |       |             |
| SARS-CoV-2 NC_045512.2 | (27647) | AACTGTTTCATCAGACAAGAGGAAGTTCAAGAACTTTACTCTCCAATTTTTCTTATTGTTGCGGCAATAGTGTTTATAACACTTTGCTTCACACTCAA  |       |       |       |       |       |       |       |       |             |
|                        |         |                                                                                                     |       |       |       |       |       |       |       |       | Section 297 |
|                        | (28713) | 28713                                                                                               | 28720 | 28730 | 28740 | 28750 | 28760 | 28770 | 28780 | 28790 | 28809       |
| HIV-1 HXB2             | (9720)  | -----                                                                                               |       |       |       |       |       |       |       |       |             |
| SARS-CoV-2 NC_045512.2 | (27744) | AAGAAAGACAGAATGATTGAACTTTCATTAATTGACTTCTATTTGTGCTTTTTAGCCTTTCTGCTATTCCCTTGTTTTAATTATGCTTATTATCTTTT  |       |       |       |       |       |       |       |       |             |
|                        |         |                                                                                                     |       |       |       |       |       |       |       |       | Section 298 |
|                        | (28810) | 28810                                                                                               | 28820 | 28830 | 28840 | 28850 | 28860 | 28870 | 28880 | 28890 | 28906       |
| HIV-1 HXB2             | (9720)  | -----                                                                                               |       |       |       |       |       |       |       |       |             |
| SARS-CoV-2 NC_045512.2 | (27841) | GGTTCTCACTTGAAGTCAAGATCATAATGAACTTGTCACGCCTAAACGAACATGAAATTTCTTGTTTTCTTAGGAATCATCACAAGTGTAGCTGC     |       |       |       |       |       |       |       |       |             |
|                        |         |                                                                                                     |       |       |       |       |       |       |       |       | Section 299 |
|                        | (28907) | 28907                                                                                               | 28920 | 28930 | 28940 | 28950 | 28960 | 28970 | 28980 | 28990 | 29003       |
| HIV-1 HXB2             | (9720)  | -----                                                                                               |       |       |       |       |       |       |       |       |             |
| SARS-CoV-2 NC_045512.2 | (27938) | ATTTACCAAGAATGTAGTTTACAGTCATGTACTCAACATCAACCATATGTAGTTGATGACCCGTGTCCTATTCACTTCTATTCTAAATGGTATATT    |       |       |       |       |       |       |       |       |             |
|                        |         |                                                                                                     |       |       |       |       |       |       |       |       | Section 300 |
|                        | (29004) | 29004                                                                                               | 29010 | 29020 | 29030 | 29040 | 29050 | 29060 | 29070 | 29080 | 29090 29100 |
| HIV-1 HXB2             | (9720)  | -----                                                                                               |       |       |       |       |       |       |       |       |             |
| SARS-CoV-2 NC_045512.2 | (28035) | AGAGTAGGAGCTAGAAAATCAGCACCTTTAATTGAATTGTGCGTGGATGAGGCTGGTTCTAAATCACCCATTTCAGTACATCGATATCGGTAATTATA  |       |       |       |       |       |       |       |       |             |
|                        |         |                                                                                                     |       |       |       |       |       |       |       |       | Section 301 |
|                        | (29101) | 29101                                                                                               | 29110 | 29120 | 29130 | 29140 | 29150 | 29160 | 29170 | 29180 | 29197       |
| HIV-1 HXB2             | (9720)  | -----                                                                                               |       |       |       |       |       |       |       |       |             |
| SARS-CoV-2 NC_045512.2 | (28132) | CAGTTTCCTGTTTACCTTTTACAATTAATTGCCAGGAACCTAAATTGGGTAGTCTTGTTAGTGCGTTGTTTCGTTCTATGAAGACTTTTTAGAGTATCA |       |       |       |       |       |       |       |       |             |

SARS-CoV-2 & HIV-1.apr

|                        |         |                                                                                                    |                       |                       |                       |                       |                       |                       |                       |                       |                       |                       |
|------------------------|---------|----------------------------------------------------------------------------------------------------|-----------------------|-----------------------|-----------------------|-----------------------|-----------------------|-----------------------|-----------------------|-----------------------|-----------------------|-----------------------|
|                        |         |                                                                                                    |                       |                       |                       |                       |                       |                       |                       |                       | Section 302           |                       |
|                        | (29198) | <a href="#">29198</a>                                                                              | <a href="#">29210</a> | <a href="#">29220</a> | <a href="#">29230</a> | <a href="#">29240</a> | <a href="#">29250</a> | <a href="#">29260</a> | <a href="#">29270</a> | <a href="#">29280</a> | <a href="#">29294</a> |                       |
| HIV-1 HXB2             | (9720)  | -----                                                                                              |                       |                       |                       |                       |                       |                       |                       |                       |                       |                       |
| SARS-CoV-2 NC_045512.2 | (28229) | TGACGTTTCGTGTTGTTTTAGATTTTCATCTAAACGAACAACTAAAATGTCTGATAATGGACCCCAAAATCAGCGAAATGCACCCCGCATTACGTTTG |                       |                       |                       |                       |                       |                       |                       |                       |                       |                       |
|                        |         |                                                                                                    |                       |                       |                       |                       |                       |                       |                       |                       | Section 303           |                       |
|                        | (29295) | <a href="#">29295</a>                                                                              | <a href="#">29300</a> | <a href="#">29310</a> | <a href="#">29320</a> | <a href="#">29330</a> | <a href="#">29340</a> | <a href="#">29350</a> | <a href="#">29360</a> | <a href="#">29370</a> | <a href="#">29380</a> | <a href="#">29391</a> |
| HIV-1 HXB2             | (9720)  | -----                                                                                              |                       |                       |                       |                       |                       |                       |                       |                       |                       |                       |
| SARS-CoV-2 NC_045512.2 | (28326) | GTGGACCCTCAGATTCAACTGGCAGTAACCAGAATGGAGAACGCAGTGGGGCGCGATCAAAACAACGTCGGCCCCAAGGTTTACCCAATAATACTGC  |                       |                       |                       |                       |                       |                       |                       |                       |                       |                       |
|                        |         |                                                                                                    |                       |                       |                       |                       |                       |                       |                       |                       | Section 304           |                       |
|                        | (29392) | <a href="#">29392</a>                                                                              | <a href="#">29400</a> | <a href="#">29410</a> | <a href="#">29420</a> | <a href="#">29430</a> | <a href="#">29440</a> | <a href="#">29450</a> | <a href="#">29460</a> | <a href="#">29470</a> | <a href="#">29488</a> |                       |
| HIV-1 HXB2             | (9720)  | -----                                                                                              |                       |                       |                       |                       |                       |                       |                       |                       |                       |                       |
| SARS-CoV-2 NC_045512.2 | (28423) | GTCTTGTTTCACCGCTCTCACTCAACATGGCAAGGAAGACCTTAAATTCCCTCGAGGACAAGGCGTTCCAATTAACACCAATAGCAGTCCAGATGAC  |                       |                       |                       |                       |                       |                       |                       |                       |                       |                       |
|                        |         |                                                                                                    |                       |                       |                       |                       |                       |                       |                       |                       | Section 305           |                       |
|                        | (29489) | <a href="#">29489</a>                                                                              | <a href="#">29500</a> | <a href="#">29510</a> | <a href="#">29520</a> | <a href="#">29530</a> | <a href="#">29540</a> | <a href="#">29550</a> | <a href="#">29560</a> | <a href="#">29570</a> | <a href="#">29585</a> |                       |
| HIV-1 HXB2             | (9720)  | -----                                                                                              |                       |                       |                       |                       |                       |                       |                       |                       |                       |                       |
| SARS-CoV-2 NC_045512.2 | (28520) | CAAATTGGCTACTACCGAAGAGCTACCAGACGAATTCGTGGTGGTGACGGTAAAATGAAAGATCTCAGTCCAAGATGGTATTTCTACTACCTAGGAA  |                       |                       |                       |                       |                       |                       |                       |                       |                       |                       |
|                        |         |                                                                                                    |                       |                       |                       |                       |                       |                       |                       |                       | Section 306           |                       |
|                        | (29586) | <a href="#">29586</a>                                                                              | <a href="#">29600</a> | <a href="#">29610</a> | <a href="#">29620</a> | <a href="#">29630</a> | <a href="#">29640</a> | <a href="#">29650</a> | <a href="#">29660</a> | <a href="#">29670</a> | <a href="#">29682</a> |                       |
| HIV-1 HXB2             | (9720)  | -----                                                                                              |                       |                       |                       |                       |                       |                       |                       |                       |                       |                       |
| SARS-CoV-2 NC_045512.2 | (28617) | CTGGGCCAGAAGCTGGACTTCCCTATGGTGCTAACAAAGACGGCATCATATGGGTTGCAACTGAGGGAGCCTTGAATACACCAAAAGATCACATTGG  |                       |                       |                       |                       |                       |                       |                       |                       |                       |                       |
|                        |         |                                                                                                    |                       |                       |                       |                       |                       |                       |                       |                       | Section 307           |                       |
|                        | (29683) | <a href="#">29683</a>                                                                              | <a href="#">29690</a> | <a href="#">29700</a> | <a href="#">29710</a> | <a href="#">29720</a> | <a href="#">29730</a> | <a href="#">29740</a> | <a href="#">29750</a> | <a href="#">29760</a> | <a href="#">29779</a> |                       |
| HIV-1 HXB2             | (9720)  | -----                                                                                              |                       |                       |                       |                       |                       |                       |                       |                       |                       |                       |
| SARS-CoV-2 NC_045512.2 | (28714) | CACCCGCAATCCTGCTAACAAATGCTGCAATCGTGCTACAACCTTCTCAAGGAACAACATTGCCAAAAGGCTTCTACGCAGAAGGGAGCAGAGGCGGC |                       |                       |                       |                       |                       |                       |                       |                       |                       |                       |
|                        |         |                                                                                                    |                       |                       |                       |                       |                       |                       |                       |                       | Section 308           |                       |
|                        | (29780) | <a href="#">29780</a>                                                                              | <a href="#">29790</a> | <a href="#">29800</a> | <a href="#">29810</a> | <a href="#">29820</a> | <a href="#">29830</a> | <a href="#">29840</a> | <a href="#">29850</a> | <a href="#">29860</a> | <a href="#">29876</a> |                       |
| HIV-1 HXB2             | (9720)  | -----                                                                                              |                       |                       |                       |                       |                       |                       |                       |                       |                       |                       |
| SARS-CoV-2 NC_045512.2 | (28811) | AGTCAAGCCTCTTCTCGTTCCCTCATCACGTAGTCGCAACAGTTCAAGAAATTCAACTCCAGGCAGCAGTAGGGGAAGTTCTCCTGCTAGAATGGCTG |                       |                       |                       |                       |                       |                       |                       |                       |                       |                       |

## SARS-CoV-2 &amp; HIV-1.apr

|                        |         |                                                                                                     |       |       |       |       |       |       |       |       |             |
|------------------------|---------|-----------------------------------------------------------------------------------------------------|-------|-------|-------|-------|-------|-------|-------|-------|-------------|
| Section 309            |         |                                                                                                     |       |       |       |       |       |       |       |       |             |
|                        | (29877) | 29877                                                                                               | 29890 | 29900 | 29910 | 29920 | 29930 | 29940 | 29950 | 29960 | 29973       |
| HIV-1 HXB2             | (9720)  | -----                                                                                               |       |       |       |       |       |       |       |       |             |
| SARS-CoV-2 NC_045512.2 | (28908) | GCAATGGCGGTGATGCTGCTCTTGCTTTGCTGCTGCTTGACAGATTGAACCAGCTTGAGAGCAAAATGTCTGGTAAAGGCCAACACAACAAGGCCA    |       |       |       |       |       |       |       |       |             |
| Section 310            |         |                                                                                                     |       |       |       |       |       |       |       |       |             |
|                        | (29974) | 29974                                                                                               | 29980 | 29990 | 30000 | 30010 | 30020 | 30030 | 30040 | 30050 | 30060 30070 |
| HIV-1 HXB2             | (9720)  | -----                                                                                               |       |       |       |       |       |       |       |       |             |
| SARS-CoV-2 NC_045512.2 | (29005) | AACTGTCACTAAGAAATCTGCTGCTGAGGCTTCTAAGAAGCCTCGGCCAAAAACGTACTGCCACTAAAGCATACAATGTAACACAAGCTTTTCGGCAGA |       |       |       |       |       |       |       |       |             |
| Section 311            |         |                                                                                                     |       |       |       |       |       |       |       |       |             |
|                        | (30071) | 30071                                                                                               | 30080 | 30090 | 30100 | 30110 | 30120 | 30130 | 30140 | 30150 | 30167       |
| HIV-1 HXB2             | (9720)  | -----                                                                                               |       |       |       |       |       |       |       |       |             |
| SARS-CoV-2 NC_045512.2 | (29102) | CGTGGTCCAGAACAAACCCAAGGAAATTTTGGGGACCAGGAAC TAATCAGACAAGGAAGT GATTACAAACATTGGCCGCAAATTGCACAATTTGCC  |       |       |       |       |       |       |       |       |             |
| Section 312            |         |                                                                                                     |       |       |       |       |       |       |       |       |             |
|                        | (30168) | 30168                                                                                               | 30180 | 30190 | 30200 | 30210 | 30220 | 30230 | 30240 | 30250 | 30264       |
| HIV-1 HXB2             | (9720)  | -----                                                                                               |       |       |       |       |       |       |       |       |             |
| SARS-CoV-2 NC_045512.2 | (29199) | CCAGCGCTTCAGCGTTCTTCGGAATGTCGCGCATTGGCATGGAAGTCACACCTTCGGGAACGTGGTTGACCTACACAGGTGCCATCAAATTGGATGA   |       |       |       |       |       |       |       |       |             |
| Section 313            |         |                                                                                                     |       |       |       |       |       |       |       |       |             |
|                        | (30265) | 30265                                                                                               | 30270 | 30280 | 30290 | 30300 | 30310 | 30320 | 30330 | 30340 | 30350 30361 |
| HIV-1 HXB2             | (9720)  | -----                                                                                               |       |       |       |       |       |       |       |       |             |
| SARS-CoV-2 NC_045512.2 | (29296) | CAAAGATCCAAATTTCAAAGATCAAGTCATTTTGCTGAATAAGCATATTGACGCATACAAAACATTCCCACCAACAGAGCCTAAAAAGGACAAAAAG   |       |       |       |       |       |       |       |       |             |
| Section 314            |         |                                                                                                     |       |       |       |       |       |       |       |       |             |
|                        | (30362) | 30362                                                                                               | 30370 | 30380 | 30390 | 30400 | 30410 | 30420 | 30430 | 30440 | 30458       |
| HIV-1 HXB2             | (9720)  | -----                                                                                               |       |       |       |       |       |       |       |       |             |
| SARS-CoV-2 NC_045512.2 | (29393) | AAGAAGGCTGATGAAACTCAAGCCTTACCGCAGAGACAGAAGAAACAGCAAAC TGTGACTCTTCTTCTGCTGCAGATTTGGATGATTTCTCCAAAC   |       |       |       |       |       |       |       |       |             |
| Section 315            |         |                                                                                                     |       |       |       |       |       |       |       |       |             |
|                        | (30459) | 30459                                                                                               | 30470 | 30480 | 30490 | 30500 | 30510 | 30520 | 30530 | 30540 | 30555       |
| HIV-1 HXB2             | (9720)  | -----                                                                                               |       |       |       |       |       |       |       |       |             |
| SARS-CoV-2 NC_045512.2 | (29490) | AATTGCAACAATCCATGAGCAGTGCTGACTCAACTCAGGCCTAAACTCATGCAGACCACACAAGGCAGATGGGCTATATAAACGTTTTTCGCTTTTCC  |       |       |       |       |       |       |       |       |             |

SARS-CoV-2 & HIV-1.apr

|                        |         |                                                                                                    |       |       |       |       |       |       |       |       |             |
|------------------------|---------|----------------------------------------------------------------------------------------------------|-------|-------|-------|-------|-------|-------|-------|-------|-------------|
|                        |         |                                                                                                    |       |       |       |       |       |       |       |       | Section 316 |
|                        | (30556) | 30556                                                                                              | 30570 | 30580 | 30590 | 30600 | 30610 | 30620 | 30630 | 30640 | 30652       |
| HIV-1 HXB2             | (9720)  | -----                                                                                              |       |       |       |       |       |       |       |       |             |
| SARS-CoV-2 NC_045512.2 | (29587) | GTTTACGATATATAGTCTACTCTTGTGCAGAATGAATTCTCGTAACTACATAGCACAAAGTAGATGTAGTTAACTTTAATCTCACATAGCAATCTTTA |       |       |       |       |       |       |       |       |             |
|                        |         |                                                                                                    |       |       |       |       |       |       |       |       | Section 317 |
|                        | (30653) | 30653                                                                                              | 30660 | 30670 | 30680 | 30690 | 30700 | 30710 | 30720 | 30730 | 30749       |
| HIV-1 HXB2             | (9720)  | -----                                                                                              |       |       |       |       |       |       |       |       |             |
| SARS-CoV-2 NC_045512.2 | (29684) | ATCAGTGTGTAACATTAGGGAGGACTTGAAAGAGCCACCACATTTTCACCGAGGCCACGCGGAGTACGATCGAGTGTACAGTGAACAATGCTAGGGA  |       |       |       |       |       |       |       |       |             |
|                        |         |                                                                                                    |       |       |       |       |       |       |       |       | Section 318 |
|                        | (30750) | 30750                                                                                              | 30760 | 30770 | 30780 | 30790 | 30800 | 30810 | 30820 | 30830 | 30846       |
| HIV-1 HXB2             | (9720)  | -----                                                                                              |       |       |       |       |       |       |       |       |             |
| SARS-CoV-2 NC_045512.2 | (29781) | GAGCTGCCTATATGGAAGAGCCCTAATGTGTAAAATTAATTTTAGTAGTGCTATCCCCATGTGATTTTAATAGCTTCTTAGGAGAATGACAAAAAAA  |       |       |       |       |       |       |       |       |             |
|                        |         |                                                                                                    |       |       |       |       |       |       |       |       | Section 319 |
|                        | (30847) | 30847                                                                                              | 30860 | 30872 |       |       |       |       |       |       |             |
| HIV-1 HXB2             | (9720)  | -----                                                                                              |       |       |       |       |       |       |       |       |             |
| SARS-CoV-2 NC_045512.2 | (29878) | AAAAAAAAAAAAAAAAAAAAAAAAAAAA                                                                       |       |       |       |       |       |       |       |       |             |
