# Supplementary material for: Ubiquitous Micro-Modular Homologies among Genomes from Viruses to Bacteria to Human Mitochondrial DNA: Platforms for Recombination during Evolution?
Source: MDPI journal article supplement (doi:10.3390/v14050885), 2022-04-24
Supplement: s1 [file s1]

## SARS-CoV-2 &amp; lambda.apr

|                                              |       |                                                                                                     |     |     |     |     |     |     |     |     |     |
|----------------------------------------------|-------|-----------------------------------------------------------------------------------------------------|-----|-----|-----|-----|-----|-----|-----|-----|-----|
|                                              |       | Section 1                                                                                           |     |     |     |     |     |     |     |     |     |
| lambda NC_001416.1<br>SARS-CoV-2 NC_045512.2 | (1)   | 1                                                                                                   | 10  | 20  | 30  | 40  | 50  | 60  | 70  | 80  | 97  |
|                                              | (1)   | GGGCGGCGACCTCGCGGGTTTTTCGCTATTTATGAAAATTTTCCGGTTTAAGGCGTTTCCGTTCTTCTTCGTCATAACTTAATGTTTTTATTTAAAT   |     |     |     |     |     |     |     |     |     |
|                                              | (1)   | -----                                                                                               |     |     |     |     |     |     |     |     |     |
|                                              |       | Section 2                                                                                           |     |     |     |     |     |     |     |     |     |
| lambda NC_001416.1<br>SARS-CoV-2 NC_045512.2 | (98)  | 98                                                                                                  | 110 | 120 | 130 | 140 | 150 | 160 | 170 | 180 | 194 |
|                                              | (98)  | ACCCTCTGAAAAGAAAGGAAACGACAGGTGCTGAAAGCGAGGCTTTTTGGCCTCTGTCTGTTTCTTTCTCTGTTTTTGTCCGTGGAATGAACAATGG   |     |     |     |     |     |     |     |     |     |
|                                              | (1)   | -----                                                                                               |     |     |     |     |     |     |     |     |     |
|                                              |       | Section 3                                                                                           |     |     |     |     |     |     |     |     |     |
| lambda NC_001416.1<br>SARS-CoV-2 NC_045512.2 | (195) | 195                                                                                                 | 200 | 210 | 220 | 230 | 240 | 250 | 260 | 270 | 291 |
|                                              | (195) | AAGTCAACAAAAAGCAGCTGGCTGACATTTTCGGTGCGAGTATCCGTACCATTCAGAACTGGCAGGAACAGGGAATGCCCGTTCTGCGAGGCGGTGG   |     |     |     |     |     |     |     |     |     |
|                                              | (1)   | -----                                                                                               |     |     |     |     |     |     |     |     |     |
|                                              |       | Section 4                                                                                           |     |     |     |     |     |     |     |     |     |
| lambda NC_001416.1<br>SARS-CoV-2 NC_045512.2 | (292) | 292                                                                                                 | 300 | 310 | 320 | 330 | 340 | 350 | 360 | 370 | 388 |
|                                              | (292) | CAAGGGTAATGAGGTGCTTTATGACTCTGCCGCCGTCATAAAATGGTATGCCGAAAGGGATGCTGAAATTGAGAACGAAAAGCTGCGCCGGGAGGTT   |     |     |     |     |     |     |     |     |     |
|                                              | (1)   | -----                                                                                               |     |     |     |     |     |     |     |     |     |
|                                              |       | Section 5                                                                                           |     |     |     |     |     |     |     |     |     |
| lambda NC_001416.1<br>SARS-CoV-2 NC_045512.2 | (389) | 389                                                                                                 | 400 | 410 | 420 | 430 | 440 | 450 | 460 | 470 | 485 |
|                                              | (389) | GAAGAACTGCGGCAGGCCAGCGAGGCAGATCTCCAGCCAGGAACTATTGAGTACGAACGCCATCGACTTACGCGTGCGCAGGCCGACGCACAGGAAC   |     |     |     |     |     |     |     |     |     |
|                                              | (1)   | -----                                                                                               |     |     |     |     |     |     |     |     |     |
|                                              |       | Section 6                                                                                           |     |     |     |     |     |     |     |     |     |
| lambda NC_001416.1<br>SARS-CoV-2 NC_045512.2 | (486) | 486                                                                                                 | 500 | 510 | 520 | 530 | 540 | 550 | 560 | 570 | 582 |
|                                              | (486) | TGAAGAATGCCAGAGACTCCGCTGAAGTGGTGGAAACCGCATTTCTGTACTTTTCGTGCTGTGCGGGATCGCAGGTGAAATTGCCAGTATTCTCGACGG |     |     |     |     |     |     |     |     |     |
|                                              | (1)   | -----                                                                                               |     |     |     |     |     |     |     |     |     |
|                                              |       | Section 7                                                                                           |     |     |     |     |     |     |     |     |     |
| lambda NC_001416.1<br>SARS-CoV-2 NC_045512.2 | (583) | 583                                                                                                 | 590 | 600 | 610 | 620 | 630 | 640 | 650 | 660 | 679 |
|                                              | (583) | GCTCCCCCTGTCTGGTGCAGCGGGCGTTTTCCGGAACTGGAAAACCGACATGTTGATTTCTGAAACGGGATATCATCAAAGCCATGAACAAAGCAGCC  |     |     |     |     |     |     |     |     |     |
|                                              | (1)   | -----                                                                                               |     |     |     |     |     |     |     |     |     |

## SARS-CoV-2 &amp; lambda.apr

|                                              |        |                                                                                                    |      |      |      |      |      |      |      |      |      |      |
|----------------------------------------------|--------|----------------------------------------------------------------------------------------------------|------|------|------|------|------|------|------|------|------|------|
| Section 8                                    |        |                                                                                                    |      |      |      |      |      |      |      |      |      |      |
| lambda NC_001416.1<br>SARS-CoV-2 NC_045512.2 | (680)  | 680                                                                                                | 690  | 700  | 710  | 720  | 730  | 740  | 750  | 760  | 776  |      |
|                                              | (680)  | GCGCTGGATGAACTGATACCGGGGTTGCTGAGTGAATATATCGAACAGTCAGGTTAACAGGCTGCGGCATTTTGTCCGCGCCGGGCTTCGCTCACTG  |      |      |      |      |      |      |      |      |      |      |
|                                              | (1)    | -----                                                                                              |      |      |      |      |      |      |      |      |      |      |
| Section 9                                    |        |                                                                                                    |      |      |      |      |      |      |      |      |      |      |
| lambda NC_001416.1<br>SARS-CoV-2 NC_045512.2 | (777)  | 777                                                                                                | 790  | 800  | 810  | 820  | 830  | 840  | 850  | 860  | 873  |      |
|                                              | (777)  | TTCAGGCCGGAGCCACAGACCGCGTTGAATGGGCGGATGCTAATTACTATCTCCCGAAAGAATCCGCATACCAGGAAGGGCGCTGGGAAACACTGC   |      |      |      |      |      |      |      |      |      |      |
|                                              | (1)    | -----                                                                                              |      |      |      |      |      |      |      |      |      |      |
| Section 10                                   |        |                                                                                                    |      |      |      |      |      |      |      |      |      |      |
| lambda NC_001416.1<br>SARS-CoV-2 NC_045512.2 | (874)  | 874                                                                                                | 880  | 890  | 900  | 910  | 920  | 930  | 940  | 950  | 960  | 970  |
|                                              | (874)  | CCTTTCAGCGGGCCATCATGAATGCGATGGGCAGCGACTACATCCGTGAGGTGAATGTGGTGAAGTCTGCCCGTGTGCGTTATTCCAAAATGCTGCT  |      |      |      |      |      |      |      |      |      |      |
|                                              | (1)    | -----                                                                                              |      |      |      |      |      |      |      |      |      |      |
| Section 11                                   |        |                                                                                                    |      |      |      |      |      |      |      |      |      |      |
| lambda NC_001416.1<br>SARS-CoV-2 NC_045512.2 | (971)  | 971                                                                                                | 980  | 990  | 1000 | 1010 | 1020 | 1030 | 1040 | 1050 | 1067 |      |
|                                              | (971)  | GGGTGTTTATGCCTACTTTATAGAGCATAAGCAGCGCAACACCCTTATCTGGTTGCCGACGGATGGTGATGCCGAGAACTTTATGAAAACCCACGTT  |      |      |      |      |      |      |      |      |      |      |
|                                              | (1)    | -----                                                                                              |      |      |      |      |      |      |      |      |      |      |
| Section 12                                   |        |                                                                                                    |      |      |      |      |      |      |      |      |      |      |
| lambda NC_001416.1<br>SARS-CoV-2 NC_045512.2 | (1068) | 1068                                                                                               | 1080 | 1090 | 1100 | 1110 | 1120 | 1130 | 1140 | 1150 | 1164 |      |
|                                              | (1068) | GAGCCGACTATTTCGTGATATTCCGTCGCTGCTGGCGCTGGCCCCGTGGTATGGCAAAAAGCACCGGGATAACACGCTCACCATGAAGCGTTTCACTA |      |      |      |      |      |      |      |      |      |      |
|                                              | (1)    | -----                                                                                              |      |      |      |      |      |      |      |      |      |      |
| Section 13                                   |        |                                                                                                    |      |      |      |      |      |      |      |      |      |      |
| lambda NC_001416.1<br>SARS-CoV-2 NC_045512.2 | (1165) | 1165                                                                                               | 1170 | 1180 | 1190 | 1200 | 1210 | 1220 | 1230 | 1240 | 1250 | 1261 |
|                                              | (1165) | ATGGGCGTGGCTTCTGGTGCCCTGGGCGGTAAAGCGGCAAAAACTACCGTGAAAAGTCGGTGATGTGGCGGGTTATGATGAACTTGCTGCTTTTGA   |      |      |      |      |      |      |      |      |      |      |
|                                              | (1)    | -----                                                                                              |      |      |      |      |      |      |      |      |      |      |
| Section 14                                   |        |                                                                                                    |      |      |      |      |      |      |      |      |      |      |
| lambda NC_001416.1<br>SARS-CoV-2 NC_045512.2 | (1262) | 1262                                                                                               | 1270 | 1280 | 1290 | 1300 | 1310 | 1320 | 1330 | 1340 | 1358 |      |
|                                              | (1262) | TGATGATATTGAACAGGAAGGCTCTCCGACGTTCTGGGTGACAAGCGTATTGAAGGCTCGGTCTGGCCAAAGTCCATCCGTGGCTCCACGCCAAAA   |      |      |      |      |      |      |      |      |      |      |
|                                              | (1)    | -----                                                                                              |      |      |      |      |      |      |      |      |      |      |

## SARS-CoV-2 &amp; lambda.apr

|                                              |        |                                                                                                    |      |      |      |      |      |      |      |      |      |
|----------------------------------------------|--------|----------------------------------------------------------------------------------------------------|------|------|------|------|------|------|------|------|------|
|                                              |        | Section 15                                                                                         |      |      |      |      |      |      |      |      |      |
| lambda NC_001416.1<br>SARS-CoV-2 NC_045512.2 | (1359) | 1359                                                                                               | 1370 | 1380 | 1390 | 1400 | 1410 | 1420 | 1430 | 1440 | 1455 |
|                                              | (1359) | GTGAGAGGCACCTGTCAGATTGAGCGTGCAGCCAGTGAATCCCCGCATTTTATGCGTTTTTCATGTTGCCTGCCCGCATTGCGGGGAGGAGCAGTATC |      |      |      |      |      |      |      |      |      |
|                                              | (1)    | -----                                                                                              |      |      |      |      |      |      |      |      |      |
|                                              |        | Section 16                                                                                         |      |      |      |      |      |      |      |      |      |
| lambda NC_001416.1<br>SARS-CoV-2 NC_045512.2 | (1456) | 1456                                                                                               | 1470 | 1480 | 1490 | 1500 | 1510 | 1520 | 1530 | 1540 | 1552 |
|                                              | (1456) | TTAAATTTGGCGACAAAGAGACGCCGTTTGGCCTCAAATGGACGCCGGATGACCCCTCCAGCGTGTTTTATCTCTGCGAGCATAATGCCTGCGTCAT  |      |      |      |      |      |      |      |      |      |
|                                              | (1)    | -----                                                                                              |      |      |      |      |      |      |      |      |      |
|                                              |        | Section 17                                                                                         |      |      |      |      |      |      |      |      |      |
| lambda NC_001416.1<br>SARS-CoV-2 NC_045512.2 | (1553) | 1553                                                                                               | 1560 | 1570 | 1580 | 1590 | 1600 | 1610 | 1620 | 1630 | 1649 |
|                                              | (1553) | CCGCCAGCAGGAGCTGGACTTTACTGATGCCCGTTATATCTGCGAAAAGACCGGGATCTGGACCCGTGATGGCATTCTCTGGTTTTTCGTATCCGGT  |      |      |      |      |      |      |      |      |      |
|                                              | (1)    | -----                                                                                              |      |      |      |      |      |      |      |      |      |
|                                              |        | Section 18                                                                                         |      |      |      |      |      |      |      |      |      |
| lambda NC_001416.1<br>SARS-CoV-2 NC_045512.2 | (1650) | 1650                                                                                               | 1660 | 1670 | 1680 | 1690 | 1700 | 1710 | 1720 | 1730 | 1746 |
|                                              | (1650) | GAAGAGATTGAGCCACCTGACAGTGTGACCTTTCACATCTGGACAGCGTACAGCCCGTTACCACCTGGGTGCAGATTGTCAAAGACTGGATGAAAA   |      |      |      |      |      |      |      |      |      |
|                                              | (1)    | -----                                                                                              |      |      |      |      |      |      |      |      |      |
|                                              |        | Section 19                                                                                         |      |      |      |      |      |      |      |      |      |
| lambda NC_001416.1<br>SARS-CoV-2 NC_045512.2 | (1747) | 1747                                                                                               | 1760 | 1770 | 1780 | 1790 | 1800 | 1810 | 1820 | 1830 | 1843 |
|                                              | (1747) | CGAAAGGGGATACGGGAAAACGTAAACCTTCGTAAACACCACGCTCGGTGAGACGTGGGAGGCGAAAATTGGCGAACGTCCGGATGCTGAAGTGAT   |      |      |      |      |      |      |      |      |      |
|                                              | (1)    | -----                                                                                              |      |      |      |      |      |      |      |      |      |
|                                              |        | Section 20                                                                                         |      |      |      |      |      |      |      |      |      |
| lambda NC_001416.1<br>SARS-CoV-2 NC_045512.2 | (1844) | 1844                                                                                               | 1850 | 1860 | 1870 | 1880 | 1890 | 1900 | 1910 | 1920 | 1940 |
|                                              | (1844) | GGCAGAGCGGAAAGAGCATTATTCAGCGCCCGTTCTTGACCGTGTGGCTTACCTGACCGCCGGTATCGACTCCCAGCTGGACCGCTACGAAATGCGC  |      |      |      |      |      |      |      |      |      |
|                                              | (1)    | -----                                                                                              |      |      |      |      |      |      |      |      |      |
|                                              |        | Section 21                                                                                         |      |      |      |      |      |      |      |      |      |
| lambda NC_001416.1<br>SARS-CoV-2 NC_045512.2 | (1941) | 1941                                                                                               | 1950 | 1960 | 1970 | 1980 | 1990 | 2000 | 2010 | 2020 | 2037 |
|                                              | (1941) | GTATGGGGATGGGGGCCGGGTGAGGAAAGCTGGCTGATTGACCGGCAGATTATTATGGGCCGCCACGACGATGAACAGACGCTGCTGCGTGTGGATG  |      |      |      |      |      |      |      |      |      |
|                                              | (1)    | -----                                                                                              |      |      |      |      |      |      |      |      |      |

## SARS-CoV-2 &amp; lambda.apr

|                                              |        |                                                                                                    |      |      |      |      |      |      |      |      |            |
|----------------------------------------------|--------|----------------------------------------------------------------------------------------------------|------|------|------|------|------|------|------|------|------------|
|                                              |        |                                                                                                    |      |      |      |      |      |      |      |      | Section 22 |
| lambda NC_001416.1<br>SARS-CoV-2 NC_045512.2 | (2038) | 2038                                                                                               | 2050 | 2060 | 2070 | 2080 | 2090 | 2100 | 2110 | 2120 | 2134       |
|                                              | (2038) | AGGCCATCAATAAAACCTATACCCGCCGGAATGGTGCAGAAATGTCGATATCCCGTATCTGCTGGGATACTGGCGGGATTGACCCGACCATTGTGTA  |      |      |      |      |      |      |      |      |            |
|                                              | (1)    | -----                                                                                              |      |      |      |      |      |      |      |      |            |
|                                              |        |                                                                                                    |      |      |      |      |      |      |      |      | Section 23 |
| lambda NC_001416.1<br>SARS-CoV-2 NC_045512.2 | (2135) | 2135                                                                                               | 2140 | 2150 | 2160 | 2170 | 2180 | 2190 | 2200 | 2210 | 2231       |
|                                              | (2135) | TGAACGCTCGAAAAACATGGGCTGTTCCGGGTGATCCCCATTAAAGGGGCATCCGTCTACGGAAGCCGGTGGCCAGCATGCCACGTAAGCGAAAC    |      |      |      |      |      |      |      |      |            |
|                                              | (1)    | -----                                                                                              |      |      |      |      |      |      |      |      |            |
|                                              |        |                                                                                                    |      |      |      |      |      |      |      |      | Section 24 |
| lambda NC_001416.1<br>SARS-CoV-2 NC_045512.2 | (2232) | 2232                                                                                               | 2240 | 2250 | 2260 | 2270 | 2280 | 2290 | 2300 | 2310 | 2328       |
|                                              | (2232) | AAAAACGGGGTTTACCTTACCGAAATCGGTACGGATACCGCGAAAGAGCAGATTTATAACCGCTTCACACTGACGCCGGAAGGGGATGAACCGCTTC  |      |      |      |      |      |      |      |      |            |
|                                              | (1)    | -----                                                                                              |      |      |      |      |      |      |      |      |            |
|                                              |        |                                                                                                    |      |      |      |      |      |      |      |      | Section 25 |
| lambda NC_001416.1<br>SARS-CoV-2 NC_045512.2 | (2329) | 2329                                                                                               | 2340 | 2350 | 2360 | 2370 | 2380 | 2390 | 2400 | 2410 | 2425       |
|                                              | (2329) | CCGGTGCCGTTCACTTCCCGAATAACCCGGATATTTTTGATCTGACCGAAGCGCAGCAGCTGACTGCTGAAGAGCAGGTCGAAAAATGGGTGGATGG  |      |      |      |      |      |      |      |      |            |
|                                              | (1)    | -----                                                                                              |      |      |      |      |      |      |      |      |            |
|                                              |        |                                                                                                    |      |      |      |      |      |      |      |      | Section 26 |
| lambda NC_001416.1<br>SARS-CoV-2 NC_045512.2 | (2426) | 2426                                                                                               | 2440 | 2450 | 2460 | 2470 | 2480 | 2490 | 2500 | 2510 | 2522       |
|                                              | (2426) | CAGGAAAAAATACTGTGGGACAGCAAAAAGCGACGCAATGAGGCACTCGACTGCTTCGTTTATGCGCTGGCGGCGCTGCGCATCAGTATTTCCCGC   |      |      |      |      |      |      |      |      |            |
|                                              | (1)    | -----                                                                                              |      |      |      |      |      |      |      |      |            |
|                                              |        |                                                                                                    |      |      |      |      |      |      |      |      | Section 27 |
| lambda NC_001416.1<br>SARS-CoV-2 NC_045512.2 | (2523) | 2523                                                                                               | 2530 | 2540 | 2550 | 2560 | 2570 | 2580 | 2590 | 2600 | 2619       |
|                                              | (2523) | TGGCAGCTGGATCTCAGTGCGCTGCTGGCGAGCCTGCAGGAAGAGGATGGTGCAGCAACCAACAAGAAAACACTGGCAGATTACGCCCGTGCCCTTAT |      |      |      |      |      |      |      |      |            |
|                                              | (1)    | -----                                                                                              |      |      |      |      |      |      |      |      |            |
|                                              |        |                                                                                                    |      |      |      |      |      |      |      |      | Section 28 |
| lambda NC_001416.1<br>SARS-CoV-2 NC_045512.2 | (2620) | 2620                                                                                               | 2630 | 2640 | 2650 | 2660 | 2670 | 2680 | 2690 | 2700 | 2716       |
|                                              | (2620) | CCGGAGAGGATGAATGACGCGACAGGAAGAACTTGCCCGTGCCCGTGCAGCACTGCATGACCTGATGACAGGTAAACGGGTGGCAACAGTACAGAAA  |      |      |      |      |      |      |      |      |            |
|                                              | (1)    | -----                                                                                              |      |      |      |      |      |      |      |      |            |

## SARS-CoV-2 &amp; lambda.apr

|                                              |        |                                                                                                     |      |      |      |      |      |      |      |      |            |
|----------------------------------------------|--------|-----------------------------------------------------------------------------------------------------|------|------|------|------|------|------|------|------|------------|
|                                              |        |                                                                                                     |      |      |      |      |      |      |      |      | Section 29 |
| lambda NC_001416.1<br>SARS-CoV-2 NC_045512.2 | (2717) | 2717                                                                                                | 2730 | 2740 | 2750 | 2760 | 2770 | 2780 | 2790 | 2800 | 2813       |
|                                              | (2717) | GACGGACGAAGGGTGGAGTTTACGGCCACTTCCGTGTCTGACCTGAAAAAATATATTGCAGAGCTGGAAGTGCAGACCGGCATGACACAGCGACGCA   |      |      |      |      |      |      |      |      |            |
|                                              | (1)    | -----                                                                                               |      |      |      |      |      |      |      |      |            |
|                                              |        |                                                                                                     |      |      |      |      |      |      |      |      | Section 30 |
| lambda NC_001416.1<br>SARS-CoV-2 NC_045512.2 | (2814) | 2814                                                                                                | 2820 | 2830 | 2840 | 2850 | 2860 | 2870 | 2880 | 2890 | 2910       |
|                                              | (2814) | GGGGACCTGCAGGATTTTATGTATGAAAACGCCACCATTCCCACCTTCTGGGGCCGGACGGCATGACATCGCTGCGCGAATATGCCGGTTATCAC     |      |      |      |      |      |      |      |      |            |
|                                              | (1)    | -----                                                                                               |      |      |      |      |      |      |      |      |            |
|                                              |        |                                                                                                     |      |      |      |      |      |      |      |      | Section 31 |
| lambda NC_001416.1<br>SARS-CoV-2 NC_045512.2 | (2911) | 2911                                                                                                | 2920 | 2930 | 2940 | 2950 | 2960 | 2970 | 2980 | 2990 | 3007       |
|                                              | (2911) | GGCGGTGGCAGCGGATTTGGAGGGCAGTTGCGGTCGTGGAACCCACCGAGTGAAAGTGTGGATGCAGCCCTGTTGCCCACTTTACCCGTGGCAATG    |      |      |      |      |      |      |      |      |            |
|                                              | (1)    | -----                                                                                               |      |      |      |      |      |      |      |      |            |
|                                              |        |                                                                                                     |      |      |      |      |      |      |      |      | Section 32 |
| lambda NC_001416.1<br>SARS-CoV-2 NC_045512.2 | (3008) | 3008                                                                                                | 3020 | 3030 | 3040 | 3050 | 3060 | 3070 | 3080 | 3090 | 3104       |
|                                              | (3008) | CCCGCGCAGACGATCTGGTACGCAATAACGGCTATGCCGCCAACGCCATCCAGCTGCATCAGGATCATATCGTCGGGTCTTTTTTCCGGCTCAGTCA   |      |      |      |      |      |      |      |      |            |
|                                              | (1)    | -----                                                                                               |      |      |      |      |      |      |      |      |            |
|                                              |        |                                                                                                     |      |      |      |      |      |      |      |      | Section 33 |
| lambda NC_001416.1<br>SARS-CoV-2 NC_045512.2 | (3105) | 3105                                                                                                | 3110 | 3120 | 3130 | 3140 | 3150 | 3160 | 3170 | 3180 | 3201       |
|                                              | (3105) | TCGCCCAAGCTGGCGCTATCTGGGCATCGGGGAGGAAGAAGCCCGTGCCTTTTCCCGCGAGGTTGAAGCGGCATGGAAAGAGTTTGCCGAGGATGAC   |      |      |      |      |      |      |      |      |            |
|                                              | (1)    | -----                                                                                               |      |      |      |      |      |      |      |      |            |
|                                              |        |                                                                                                     |      |      |      |      |      |      |      |      | Section 34 |
| lambda NC_001416.1<br>SARS-CoV-2 NC_045512.2 | (3202) | 3202                                                                                                | 3210 | 3220 | 3230 | 3240 | 3250 | 3260 | 3270 | 3280 | 3298       |
|                                              | (3202) | TGCTGCTGCATTGACGTTGAGCGAAAAACGCACGTTTACCATGATGATTGCGGAAGGTGTGGCCATGCACGCCTTTAACGGTGAAGTGTTCGTTTCAAG |      |      |      |      |      |      |      |      |            |
|                                              | (1)    | -----                                                                                               |      |      |      |      |      |      |      |      |            |
|                                              |        |                                                                                                     |      |      |      |      |      |      |      |      | Section 35 |
| lambda NC_001416.1<br>SARS-CoV-2 NC_045512.2 | (3299) | 3299                                                                                                | 3310 | 3320 | 3330 | 3340 | 3350 | 3360 | 3370 | 3380 | 3395       |
|                                              | (3299) | CCACCTGGGATACCAGTTCGTCGCGGCTTTTCCGGACACAGTTCCGGATGGTCAGCCCGAAGCGCATCAGCAACCCGAACAATACCGGCGACAGCCG   |      |      |      |      |      |      |      |      |            |
|                                              | (1)    | -----                                                                                               |      |      |      |      |      |      |      |      |            |

## SARS-CoV-2 &amp; lambda.apr

|                        |        |                                                                                                   |      |      |      |      |      |      |      |      |            |      |
|------------------------|--------|---------------------------------------------------------------------------------------------------|------|------|------|------|------|------|------|------|------------|------|
|                        |        |                                                                                                   |      |      |      |      |      |      |      |      | Section 36 |      |
| lambda NC_001416.1     | (3396) | 3396                                                                                              | 3410 | 3420 | 3430 | 3440 | 3450 | 3460 | 3470 | 3480 | 3492       |      |
| SARS-CoV-2 NC_045512.2 | (3396) | GAACTGCCGTGCCGGTGTGCAGATTAATGACAGCGGTGCGGCGCTGGGATATTACGTCAGCGAGGACGGGTATCCTGGCTGGATGCCGCAGAAATGG |      |      |      |      |      |      |      |      |            |      |
|                        | (1)    | -----                                                                                             |      |      |      |      |      |      |      |      |            |      |
|                        |        |                                                                                                   |      |      |      |      |      |      |      |      | Section 37 |      |
| lamhda NC_001416.1     | (3493) | 3493                                                                                              | 3500 | 3510 | 3520 | 3530 | 3540 | 3550 | 3560 | 3570 | 3589       |      |
| SARS-CoV-2 NC_045512.2 | (3493) | ACATGGATACCCCGTGAGTTACCCGGCGGGCGCGCCTCGTTCATTACGTTTTTTGAACCCGTGGAGGACGGGCAGACTCGCGGTGCAAATGTGTTTT |      |      |      |      |      |      |      |      |            |      |
|                        | (1)    | -----                                                                                             |      |      |      |      |      |      |      |      |            |      |
|                        |        |                                                                                                   |      |      |      |      |      |      |      |      | Section 38 |      |
| lambda NC_001416.1     | (3590) | 3590                                                                                              | 3600 | 3610 | 3620 | 3630 | 3640 | 3650 | 3660 | 3670 | 3686       |      |
| SARS-CoV-2 NC_045512.2 | (3590) | ACAGCGTGATGGAGCAGATGAAGATGCTCGACACGCTGCAGAACACGCAGCTGCAGAGCGCCATTGTGAAGGCGATGTATGCCGCCACCATTGAGAG |      |      |      |      |      |      |      |      |            |      |
|                        | (1)    | -----                                                                                             |      |      |      |      |      |      |      |      |            |      |
|                        |        |                                                                                                   |      |      |      |      |      |      |      |      | Section 39 |      |
| lamhda NC_001416.1     | (3687) | 3687                                                                                              | 3700 | 3710 | 3720 | 3730 | 3740 | 3750 | 3760 | 3770 | 3783       |      |
| SARS-CoV-2 NC_045512.2 | (3687) | TGAGCTGGATACGCAGTCAGCGATGGATTTTATTCTGGGCGCGAACAGTCAGGAGCAGCGGGAAAGGCTGACCGGCTGGATTGGTGAAATTGCCGCG |      |      |      |      |      |      |      |      |            |      |
|                        | (1)    | -----                                                                                             |      |      |      |      |      |      |      |      |            |      |
|                        |        |                                                                                                   |      |      |      |      |      |      |      |      | Section 40 |      |
| lambda NC_001416.1     | (3784) | 3784                                                                                              | 3790 | 3800 | 3810 | 3820 | 3830 | 3840 | 3850 | 3860 | 3870       | 3880 |
| SARS-CoV-2 NC_045512.2 | (3784) | TATTACGCCGCAGCGCCGGTCCGGCTGGGAGGCGCAAAAGTACCGCACCTGATGCCGGGTGACTCACTGAACCTGCAGACGGCTCAGGATACGGATA |      |      |      |      |      |      |      |      |            |      |
|                        | (1)    | -----                                                                                             |      |      |      |      |      |      |      |      |            |      |
|                        |        |                                                                                                   |      |      |      |      |      |      |      |      | Section 41 |      |
| lambda NC_001416.1     | (3881) | 3881                                                                                              | 3890 | 3900 | 3910 | 3920 | 3930 | 3940 | 3950 | 3960 | 3977       |      |
| SARS-CoV-2 NC_045512.2 | (3881) | ACGGCTACTCCGTGTTTGAGCAGTCACTGCTGCGGTATATCGCTGCCGGGCTGGGTGTCTCGTATGAGCAGCTTTCCCGGAATTACGCCCAGATGAG |      |      |      |      |      |      |      |      |            |      |
|                        | (1)    | -----                                                                                             |      |      |      |      |      |      |      |      |            |      |
|                        |        |                                                                                                   |      |      |      |      |      |      |      |      | Section 42 |      |
| lamhda NC_001416.1     | (3978) | 3978                                                                                              | 3990 | 4000 | 4010 | 4020 | 4030 | 4040 | 4050 | 4060 | 4074       |      |
| SARS-CoV-2 NC_045512.2 | (3978) | CTACTCCACGGCACGGGCCAGTGCGAACGAGTCGTGGGCGTACTTTATGGGGCGGCGAAAATTCGTCGCATCCCGTCAGGCGAGCCAGATGTTTCTG |      |      |      |      |      |      |      |      |            |      |
|                        | (1)    | -----                                                                                             |      |      |      |      |      |      |      |      |            |      |

## SARS-CoV-2 &amp; lambda.apr

|                                              |        |                                                                                                    |      |      |      |      |      |      |      |      |      |      |
|----------------------------------------------|--------|----------------------------------------------------------------------------------------------------|------|------|------|------|------|------|------|------|------|------|
| Section 43                                   |        |                                                                                                    |      |      |      |      |      |      |      |      |      |      |
| lambda NC_001416.1<br>SARS-CoV-2 NC_045512.2 | (4075) | 4075                                                                                               | 4080 | 4090 | 4100 | 4110 | 4120 | 4130 | 4140 | 4150 | 4160 | 4171 |
|                                              | (4075) | TGCTGGCTGGAAGAGGCCATCGTTCGCCGCGTGGTGACGTTACCTTCAAAAGCGCGCTTCAGTTTTTCAGGAAGCCCGCAGTGCCTGGGGAACTGCG  |      |      |      |      |      |      |      |      |      |      |
|                                              | (1)    | -----                                                                                              |      |      |      |      |      |      |      |      |      |      |
| Section 44                                   |        |                                                                                                    |      |      |      |      |      |      |      |      |      |      |
| lambda NC_001416.1<br>SARS-CoV-2 NC_045512.2 | (4172) | 4172                                                                                               | 4180 | 4190 | 4200 | 4210 | 4220 | 4230 | 4240 | 4250 |      | 4268 |
|                                              | (4172) | ACTGGATAGGCTCCGGTCGTATGGCCATCGATGGTCTGAAAGAAGTTCAGGAAGCGGTGATGCTGATAGAAGCCGGACTGAGTACCTACGAGAAAGA  |      |      |      |      |      |      |      |      |      |      |
|                                              | (1)    | -----                                                                                              |      |      |      |      |      |      |      |      |      |      |
| Section 45                                   |        |                                                                                                    |      |      |      |      |      |      |      |      |      |      |
| lambda NC_001416.1<br>SARS-CoV-2 NC_045512.2 | (4269) | 4269                                                                                               | 4280 | 4290 | 4300 | 4310 | 4320 | 4330 | 4340 | 4350 |      | 4365 |
|                                              | (4269) | GTGCGCAAAACGCGGTGACGACTATCAGGAAATTTTGTCCAGCAGGTCCGTGAAACGATGGAGCGCCGTGCAGCCGGTCTTAAACGCCCGCCTGG    |      |      |      |      |      |      |      |      |      |      |
|                                              | (1)    | -----                                                                                              |      |      |      |      |      |      |      |      |      |      |
| Section 46                                   |        |                                                                                                    |      |      |      |      |      |      |      |      |      |      |
| lambda NC_001416.1<br>SARS-CoV-2 NC_045512.2 | (4366) | 4366                                                                                               | 4380 | 4390 | 4400 | 4410 | 4420 | 4430 | 4440 | 4450 |      | 4462 |
|                                              | (4366) | GCGGCTGCAGCATTTGAATCCGGGCTGCGACAATCAACAGAGGAGGAGAAGAGTGACAGCAGAGCTGCGTAATCTCCCGCATATTGCCAGCATGGCC  |      |      |      |      |      |      |      |      |      |      |
|                                              | (1)    | -----                                                                                              |      |      |      |      |      |      |      |      |      |      |
| Section 47                                   |        |                                                                                                    |      |      |      |      |      |      |      |      |      |      |
| lambda NC_001416.1<br>SARS-CoV-2 NC_045512.2 | (4463) | 4463                                                                                               | 4470 | 4480 | 4490 | 4500 | 4510 | 4520 | 4530 | 4540 |      | 4559 |
|                                              | (4463) | TTTAATGAGCCGCTGATGCTTGAACCCGCCTATGCGCGGGTTTTCTTTTGTGCGCTTGACAGGCCAGCTTGGGATCAGCAGCCTGACGGATGCGGTGT |      |      |      |      |      |      |      |      |      |      |
|                                              | (1)    | -----                                                                                              |      |      |      |      |      |      |      |      |      |      |
| Section 48                                   |        |                                                                                                    |      |      |      |      |      |      |      |      |      |      |
| lambda NC_001416.1<br>SARS-CoV-2 NC_045512.2 | (4560) | 4560                                                                                               | 4570 | 4580 | 4590 | 4600 | 4610 | 4620 | 4630 | 4640 |      | 4656 |
|                                              | (4560) | CCGGCGACAGCCTGACTGCCAGGAGGCACTCGCGACGCTGGCATTATCCGGTGATGATGACGGACCACGACAGGCCCGCAGTTATCAGGTCATGAA   |      |      |      |      |      |      |      |      |      |      |
|                                              | (1)    | -----                                                                                              |      |      |      |      |      |      |      |      |      |      |
| Section 49                                   |        |                                                                                                    |      |      |      |      |      |      |      |      |      |      |
| lambda NC_001416.1<br>SARS-CoV-2 NC_045512.2 | (4657) | 4657                                                                                               | 4670 | 4680 | 4690 | 4700 | 4710 | 4720 | 4730 | 4740 |      | 4753 |
|                                              | (4657) | CGGCATCGCCGTGCTGCCGGTGTCCGGCA-----CGCTGGTCAGCCGGAACCGGG-C-GCTGCAGCCGTACTCGGGATGACCGGTTACAACGGCAT   |      |      |      |      |      |      |      |      |      |      |
|                                              | (1)    | -----ATTAAAGGTTTATACCTTCACAGGTAACAAACCAACCAACTTTCGATCTCTTGATGATCTGTTCTCTAAACGAACCTTT---A           |      |      |      |      |      |      |      |      |      |      |

## SARS-CoV-2 &amp; lambda.apr

|                        |        |              |              |           |             |          |          |                  |            |             |          |            |             |          |            |             |
|------------------------|--------|--------------|--------------|-----------|-------------|----------|----------|------------------|------------|-------------|----------|------------|-------------|----------|------------|-------------|
| Section 50             |        |              |              |           |             |          |          |                  |            |             |          |            |             |          |            |             |
| lambda NC_001416.1     | (4754) | 4754         | 4760         | 4770      | 4780        | 4790     | 4800     | 4810             | 4820       | 4830        | 4840     | 4850       |             |          |            |             |
| SARS-CoV-2 NC_045512.2 | (4747) | TATCGCCC     | GTCTGCAA     | CAGGCTGC  | CAGCGATCCGA | TG----   | GTGGA    | CGGCATTC         | TGCTCGATAT | -----       | GGACACG  | CCCGGGGATG | GTGGCGG     |          |            |             |
|                        | (80)   | AAATCTGT     | GTGGCTGT     | CACCTCGC  | TGCATGCTTAG | TGCACT   | -CACG    | CAGTAT           | AACTAATA   | ACTAATTACT  | GTCGTTGA | CAGGACACG  | --AGTTAACTC |          |            |             |
| Section 51             |        |              |              |           |             |          |          |                  |            |             |          |            |             |          |            |             |
| lambda NC_001416.1     | (4851) | 4851         | 4860         | 4870      | 4880        | 4890     | 4900     | 4910             | 4920       | 4930        |          | 4947       |             |          |            |             |
| SARS-CoV-2 NC_045512.2 | (4833) | GGGCATTTGA   | CTGCGCTGACAT | T--CAT    | CGCCCGTGTG  | CGTGACAT | TAAAC    | CGGTATGGGCGCTTGC | CAAC       | CGACATGAAC  | TGCAGTGC | CAGGT      | CAGTTG      |          |            |             |
|                        | (174)  | GTCTAT       | -----        | CTTCTG    | CAGGC       | TGCTTA   | CGGTTTC  | GTCCGTG          | -T-TGCAGC  | ---CGATCATC | -AGCA    | CATCTAGG   | ----TTTCTG  | CTCGGT   | ---GTG     |             |
| Section 52             |        |              |              |           |             |          |          |                  |            |             |          |            |             |          |            |             |
| lambda NC_001416.1     | (4948) | 4948         | 4960         | 4970      | 4980        | 4990     | 5000     | 5010             | 5020       | 5030        |          | 5044       |             |          |            |             |
| SARS-CoV-2 NC_045512.2 | (4928) | CTTGCCAGTGCC | GCCTCCCGGC   | GTCTGGTCA | CGG-AG      | ACCGCC   | CGGAC    | CAGGCTCAT        | CGGCGTCA   | TGATGGC     | -----    | TCACAGTAAT | TTACG       | GTGCTG   |            |             |
|                        | (253)  | ACCGAAAGGTAA | GA-TGGAG     | -AGCCT--  | TGTCCGTG    | TTTCAA   | CG-AG    | -AAAA            | CACACGT    | CAAC        | TAGTTTGC | CTGT       | TTTTAC      | AGGTT    | CGCGACGTG  |             |
| Section 53             |        |              |              |           |             |          |          |                  |            |             |          |            |             |          |            |             |
| lambda NC_001416.1     | (5045) | 5045         | 5050         | 5060      | 5070        | 5080     | 5090     | 5100             | 5110       | 5120        | 5130     | 5141       |             |          |            |             |
| SARS-CoV-2 NC_045512.2 | (5019) | CGC---TGGA   | GAAACA       | GGGTGG    | TGGAAATCA   | CGCTGAT  | TT-A     | CAGCGGCA         | GCCAT      | AAAGG       | -TGGATG  | GCAAC      | CCCTAC      | AGCCATCT | TCCGGATG   | ---AC       |
|                        | (344)  | CTCGTAC      | GTGCTTTG     | GAGACT    | TCCGT-GG    | AGGAG    | GTC      | TTAT             | CAGAGGCA   | CGT-C       | AA       | CATCTT     | AAAGAT      | GGCACT   | TGTGGCTTAG | TAGAAGTTGAA |
| Section 54             |        |              |              |           |             |          |          |                  |            |             |          |            |             |          |            |             |
| lambda NC_001416.1     | (5142) | 5142         | 5150         | 5160      | 5170        | 5180     | 5190     | 5200             | 5210       | 5220        |          | 5238       |             |          |            |             |
| SARS-CoV-2 NC_045512.2 | (5108) | G-TCCGGGA    | GACACATG     | CAGTCC    | GGATGGA     | CGCA---  | ACCGCCA  | GAT-GTT          | TGCGCAG    | AAGGTGT     | CGGCATAT | TACCGCC    | TGTCCGT     | GCAGGT   | TGT        |             |
|                        | (439)  | AGGCGTTTT    | GCCTCAA      | CTTGAA    | CAGCCCTAT   | GTGTTCA  | ATC-AAAC | GTTCGGAT         | TGCTGAA    | ACTGCAC     | CTCATGG  | TCATGTTA   | TGGTTG      | AGCTGGT  | AG-        |             |
| Section 55             |        |              |              |           |             |          |          |                  |            |             |          |            |             |          |            |             |
| lambda NC_001416.1     | (5239) | 5239         | 5250         | 5260      | 5270        | 5280     | 5290     | 5300             | 5310       | 5320        |          | 5335       |             |          |            |             |
| SARS-CoV-2 NC_045512.2 | (5200) | GCTGGATAC    | CGAGGCTGCAGT | GTACAGCG  | GTGAGG      | CCATTGA  | TGCCGGA  | CTGGCTGA         | TGAAC      | TGTTAACAG   | CACCGATG | CGATC      | ACCGT       | CATG     |            |             |
|                        | (534)  | -CAGAACT-    | CGAAGGCATTCA | GTACGGTC  | GTAGTGGT    | GAGACACT | TGGTGTCT | CTGTG            | TCCCTCAT   | GT-----     | GGGCGA   | A--A       | AT--A       | CCAG     |            |             |
| Section 56             |        |              |              |           |             |          |          |                  |            |             |          |            |             |          |            |             |
| lambda NC_001416.1     | (5336) | 5336         | 5350         | 5360      | 5370        | 5380     | 5390     | 5400             | 5410       | 5420        |          | 5432       |             |          |            |             |
| SARS-CoV-2 NC_045512.2 | (5297) | CTGATGCAC    | TGGATGCAC    | GTAATCC   | CGTCTCT     | CAGGAGGG | C--G-AA  | TGACCAA          | A----      | GAGACTCA    | ATCAACAA | C-TGTT     | TCAGCC      | AC----   | TG         |             |
|                        | (612)  | TG----       | GC--TT       | TACCGCA   | AGGTTCTTC   | --TTCG   | TAAAGAC  | GGTAATA          | AA-----    | GGAGCTGT    | GTGGCAT  | AGTTAC     | GGCGCCGATC  | TAA-A    | -GTCAT     |             |



SARS-CoV-2 & lambda.apr

|                        |        |            |         |        |         |           |            |         |         |         |             |            |
|------------------------|--------|------------|---------|--------|---------|-----------|------------|---------|---------|---------|-------------|------------|
|                        |        | Section 57 |         |        |         |           |            |         |         |         |             |            |
|                        |        | (5433)     | 5433    | 5440   | 5450    | 5460      | 5470       | 5480    | 5490    | 5500    | 5510        | 5529       |
| lambda NC_001416.1     | (5382) | CTT        | CGC     | AGGC   | TG      | ACG       | TTAC       | TGA     | CGT     | GTG     | CC          | AGCGACG    |
| SARS-CoV-2 NC_045512.2 | (694)  | TGA        | CTT     | AGGC   | G       | ACG       | AGCT       | TGG     | CACT    | GAT     | CC          | TTATGAA    |
|                        |        | Section 58 |         |        |         |           |            |         |         |         |             |            |
|                        |        | (5530)     | 5530    | 5540   | 5550    | 5560      | 5570       | 5580    | 5590    | 5600    | 5610        | 5626       |
| lambda NC_001416.1     | (5479) | TGCG       | GCAGAA  | A      | ---     | ACA       | GC         | CGC     | ATT     | TG      | GG          | AT         |
| SARS-CoV-2 NC_045512.2 | (787)  | GCGT       | GAGCTT  | AACGG  | AGG     | GG        | CAT        | ACAC    | TG      | CT      | AT          | G          |
|                        |        | Section 59 |         |        |         |           |            |         |         |         |             |            |
|                        |        | (5627)     | 5627    | 5640   | 5650    | 5660      | 5670       | 5680    | 5690    | 5700    | 5710        | 5723       |
| lambda NC_001416.1     | (5572) | TAT        | G       | A      | ---     | C         | CGT        | G       | AAA     | ACG     | GCC         | CGC        |
| SARS-CoV-2 NC_045512.2 | (875)  | CT         | T       | CTAGCA | CGTG    | CTGGTAAAG | TT         | CAT     | GCA     | CT      | TTGTCCGAACA | ACTGGACTTT |
|                        |        | Section 60 |         |        |         |           |            |         |         |         |             |            |
|                        |        | (5724)     | 5724    | 5730   | 5740    | 5750      | 5760       | 5770    | 5780    | 5790    | 5800        | 5820       |
| lambda NC_001416.1     | (5657) | ATGC       | AGGG    | GGC    | ACCGG   | CA        | ---        | ---     | CGCTG   | G       | CTGCAG      | G          |
| SARS-CoV-2 NC_045512.2 | (972)  | ATGA       | AATT    | G      | CTTGTA  | CA        | CGGAA      | CGTTCT  | G       | AAAAGAG | --          | CTAT       |
|                        |        | Section 61 |         |        |         |           |            |         |         |         |             |            |
|                        |        | (5821)     | 5821    | 5830   | 5840    | 5850      | 5860       | 5870    | 5880    | 5890    | 5900        | 5917       |
| lambda NC_001416.1     | (5747) | ATGAC      | GAGC    | AAA    | GAAACCT | TT        | ACCC       | AT      | TACCAGC | -       | GG          | CAGGGCAA   |
| SARS-CoV-2 NC_045512.2 | (1064) | AATGG      | G       | --     | G       | AAT       | GTCCAAA    | TT      | TTGTAT  | -----   | TT          | CC         |
|                        |        | Section 62 |         |        |         |           |            |         |         |         |             |            |
|                        |        | (5918)     | 5918    | 5930   | 5940    | 5950      | 5960       | 5970    | 5980    | 5990    | 6000        | 6014       |
| lambda NC_001416.1     | (5841) | CGCC       | TGCAATG | ACCCCG | CT      | GAT       | GCTGGACACC | TCCAG   | CC      | G       | TAAG        | CTGGTTGC   |
| SARS-CoV-2 NC_045512.2 | (1149) | GCTT       | TATGGGT | AGAATT | C       | GAT       | ---        | CTGTCTA | TCCAG   | TTG     | CGT         | -          |
|                        |        | Section 63 |         |        |         |           |            |         |         |         |             |            |
|                        |        | (6015)     | 6015    | 6020   | 6030    | 6040      | 6050       | 6060    | 6070    | 6080    | 6090        | 6111       |
| lambda NC_001416.1     | (5936) | GT         | TGCTGC  | TG     | ACCA    | GACC      | AGCA       | C       | CAC     | GC      | T           | GACG       |
| SARS-CoV-2 NC_045512.2 | (1233) | GT         | GATCAT  | TG     | TGGT    | G         | -          | AA      | CTT     | CATG    | GA          | GACG       |

SARS-CoV-2 & lambda.apr

|                                              |        |                                                                                                       |      |      |      |      |      |      |      |      |      |      |  |  |  |  |  |
|----------------------------------------------|--------|-------------------------------------------------------------------------------------------------------|------|------|------|------|------|------|------|------|------|------|--|--|--|--|--|
|                                              |        | Section 64                                                                                            |      |      |      |      |      |      |      |      |      |      |  |  |  |  |  |
| lambda NC_001416.1<br>SARS-CoV-2 NC_045512.2 | (6112) | 6112                                                                                                  | 6120 | 6130 | 6140 | 6150 | 6160 | 6170 | 6180 | 6190 | 6208 |      |  |  |  |  |  |
|                                              | (6029) | GAGACGAAAAAACGGACCGCGTTTGGCCGGAACGCGCAATCAGCATCGTTTAACCTTACCCTTCATCACTAAAGGCCGCCGTGTGCGGCCTTTTTTTACGG |      |      |      |      |      |      |      |      |      |      |  |  |  |  |  |
|                                              | (1326) | CCACTACTTGTGGTTACTTA---CCCAAAATGCTGTTGTTAAAATTTA-T--T-GTCAGCATG-----TCACAAATTCAGAAGTAGGACCTGAG        |      |      |      |      |      |      |      |      |      |      |  |  |  |  |  |
|                                              |        | Section 65                                                                                            |      |      |      |      |      |      |      |      |      |      |  |  |  |  |  |
| lambda NC_001416.1<br>SARS-CoV-2 NC_045512.2 | (6209) | 6209                                                                                                  | 6220 | 6230 | 6240 | 6250 | 6260 | 6270 | 6280 | 6290 | 6305 |      |  |  |  |  |  |
|                                              | (6126) | GATTTTTTTA---TGTGATGTACACAACCGCCAA-CTGC---TGGCGGCAATGAGCAGAAATTTAAGTTTGATCCGCTGTTTTCT---GCGT          |      |      |      |      |      |      |      |      |      |      |  |  |  |  |  |
|                                              | (1409) | CATAGTCTTGCCGAATACCAT---AATGAATCTGCGTTGAAAACCATTCCTTCGTAAAG-GGTGGTCGCACTATT---GCCCTTGAGGGCTGTGTGT     |      |      |      |      |      |      |      |      |      |      |  |  |  |  |  |
|                                              |        | Section 66                                                                                            |      |      |      |      |      |      |      |      |      |      |  |  |  |  |  |
| lambda NC_001416.1<br>SARS-CoV-2 NC_045512.2 | (6306) | 6306                                                                                                  | 6320 | 6330 | 6340 | 6350 | 6360 | 6370 | 6380 | 6390 | 6402 |      |  |  |  |  |  |
|                                              | (6210) | CTCTTTT-----TCCGTGAGAGCTATCCCTTCACCACGGAGAA-----AGTCTATCTCT--CAAAATTCCGGGACTGTTAAACATGGCGCT           |      |      |      |      |      |      |      |      |      |      |  |  |  |  |  |
|                                              | (1498) | CTCTTTATGTTGGTTGCCATAACAAGTGTGCTTATTGGGTTCCACGTGCTAGCGCTAACATAGGTTGTAAACCATACAGGTGTGTTGGAGAGGTTCC     |      |      |      |      |      |      |      |      |      |      |  |  |  |  |  |
|                                              |        | Section 67                                                                                            |      |      |      |      |      |      |      |      |      |      |  |  |  |  |  |
| lambda NC_001416.1<br>SARS-CoV-2 NC_045512.2 | (6403) | 6403                                                                                                  | 6410 | 6420 | 6430 | 6440 | 6450 | 6460 | 6470 | 6480 | 6499 |      |  |  |  |  |  |
|                                              | (6290) | GTACGTTCGCCGATT--GTTTCCGGTGAGGTTATCCG-----TTCCTGGTGGCGGCCTCCACTCT-GAATTTACGCCGGGATATGTCAGAG--CCG      |      |      |      |      |      |      |      |      |      |      |  |  |  |  |  |
|                                              | (1595) | GAAGGTCTTAATGACAACCTTCTTGAATAACTCCAAGAGAGAAAGTCAAC--ATCAATATTGTTGGTGACTTTTAACTTAATGAGAGATCGCCA        |      |      |      |      |      |      |      |      |      |      |  |  |  |  |  |
|                                              |        | Section 68                                                                                            |      |      |      |      |      |      |      |      |      |      |  |  |  |  |  |
| lambda NC_001416.1<br>SARS-CoV-2 NC_045512.2 | (6500) | 6500                                                                                                  | 6510 | 6520 | 6530 | 6540 | 6550 | 6560 | 6570 | 6580 | 6596 |      |  |  |  |  |  |
|                                              | (6375) | AAGCATGAAGTGAAATCCGCAGATGACCTGCGT-CGCTTGGCGATGAGATCCGCAGAACTCTGGCGGACCCGGCTTACCGC-CGCCGTGCGCATCAT     |      |      |      |      |      |      |      |      |      |      |  |  |  |  |  |
|                                              | (1689) | TTATTTTGGGCATCTTTT-TCTGCTTCC--ACAAGTGGCTTTTGTGAAACTGTGAAAGGT-TTGGATTATAAAG-CATTCAA-A--CAAATTGTTGAA    |      |      |      |      |      |      |      |      |      |      |  |  |  |  |  |
|                                              |        | Section 69                                                                                            |      |      |      |      |      |      |      |      |      |      |  |  |  |  |  |
| lambda NC_001416.1<br>SARS-CoV-2 NC_045512.2 | (6597) | 6597                                                                                                  | 6610 | 6620 | 6630 | 6640 | 6650 | 6660 | 6670 | 6680 | 6693 |      |  |  |  |  |  |
|                                              | (6470) | CATGCAGAACATGCGTGACGAAGAGCTGGCCA--TGCTCAGGTCTGAAGAAGATGTCAGGAGTTTCTGCCGTGCTTAAGGGCAAAATACACCATGACCG   |      |      |      |      |      |      |      |      |      |      |  |  |  |  |  |
|                                              | (1778) | TCCTGTGGTAATTTTAAAGTTACAAAAAGGAAAGCTTAAAAAGGTGCTGGAATATTGGTGAACA-GAAATCAATACTGAGTCCTCTTTATGCAATT      |      |      |      |      |      |      |      |      |      |      |  |  |  |  |  |
|                                              |        | Section 70                                                                                            |      |      |      |      |      |      |      |      |      |      |  |  |  |  |  |
| lambda NC_001416.1<br>SARS-CoV-2 NC_045512.2 | (6694) | 6694                                                                                                  | 6700 | 6710 | 6720 | 6730 | 6740 | 6750 | 6760 | 6770 | 6780 | 6790 |  |  |  |  |  |
|                                              | (6565) | GTGAAGCCTTCGATCCGGTTGAGGTGGATATGGGCCTGAGTGAAGGAGAATACATC-ACGCAATCCCGGCGGACCGGAGTGGAGCAAGCGTGACCAAGT   |      |      |      |      |      |      |      |      |      |      |  |  |  |  |  |
|                                              | (1874) | GCATCAGAGGCTGCTCGTGTGTGTACGATCAATTTTCTCCGCACT-CTTGA--AACTGCTCAA-AATTCTGTGCGTGTTTTA--C-AGAAAGGCGCT     |      |      |      |      |      |      |      |      |      |      |  |  |  |  |  |

SARS-CoV-2 & lambda.apr

|                                              |        |                                                                                                     |        |                                                                                                    |      |      |      |      |      |      |      |      |  |  |  |  |  |  |  |
|----------------------------------------------|--------|-----------------------------------------------------------------------------------------------------|--------|----------------------------------------------------------------------------------------------------|------|------|------|------|------|------|------|------|--|--|--|--|--|--|--|
|                                              |        | Section 71                                                                                          |        |                                                                                                    |      |      |      |      |      |      |      |      |  |  |  |  |  |  |  |
| lambda NC_001416.1<br>SARS-CoV-2 NC_045512.2 | (6791) | 6791                                                                                                | 6800   | 6810                                                                                               | 6820 | 6830 | 6840 | 6850 | 6860 | 6870 | 6887 |      |  |  |  |  |  |  |  |
|                                              | (6661) | CCAC--GTATGACCCGACCGACGATATCGAAGCCTACGCGCTGAACGCACGCGGTGGTGA--TATCATCGTGTTCGATCCGAAAGGCTGGGC        | (1964) | ATACAACTAGATGGAATTTCAAGT---ATTCA---CTGAGACTCATTGATGCTATGTGTAC-ATCTGATTTGGCTACTACCAATCTAGT          |      |      |      |      |      |      |      |      |  |  |  |  |  |  |  |
|                                              |        | Section 72                                                                                          |        |                                                                                                    |      |      |      |      |      |      |      |      |  |  |  |  |  |  |  |
| lambda NC_001416.1<br>SARS-CoV-2 NC_045512.2 | (6888) | 6888                                                                                                | 6900   | 6910                                                                                               | 6920 | 6930 | 6940 | 6950 | 6960 | 6970 | 6984 |      |  |  |  |  |  |  |  |
|                                              | (6754) | TGTTCCTTCTTCAAAGCCGTCAAGGAGAAGCTGGATACCGTCTGTGGCTCTAATTCCGAGCTGGAGACAGCGGTGAAAGACCTGGGC             | (2053) | TGTAATGGCTACATTACAGGTGGTGTTCAGTTGACTTCG-CA---GTGGCTAACTAACATCTTTGG-CA-----CTGTTTATGAAAACT--T       |      |      |      |      |      |      |      |      |  |  |  |  |  |  |  |
|                                              |        | Section 73                                                                                          |        |                                                                                                    |      |      |      |      |      |      |      |      |  |  |  |  |  |  |  |
| lambda NC_001416.1<br>SARS-CoV-2 NC_045512.2 | (6985) | 6985                                                                                                | 6990   | 7000                                                                                               | 7010 | 7020 | 7030 | 7040 | 7050 | 7060 | 7070 | 7081 |  |  |  |  |  |  |  |
|                                              | (6851) | GTCCTATAAGGGGATGTATGGCGATGTGGCCATCGT---CGTGTAATTCGGA--CAGTACGTGGAAAACGGCGTCAAAAAGAACTTTCCT-GC--GG   | (2137) | CAAACCCGTCCTTGATTGGCTTGAAG---AGAGTTAAAGGAAGGTGTAGAGTTTCTTAGAGACGGTTGGAAATTGTTAAATTATCTCAACCTGT     |      |      |      |      |      |      |      |      |  |  |  |  |  |  |  |
|                                              |        | Section 74                                                                                          |        |                                                                                                    |      |      |      |      |      |      |      |      |  |  |  |  |  |  |  |
| lambda NC_001416.1<br>SARS-CoV-2 NC_045512.2 | (7082) | 7082                                                                                                | 7090   | 7100                                                                                               | 7110 | 7120 | 7130 | 7140 | 7150 | 7160 | 7178 |      |  |  |  |  |  |  |  |
|                                              | (6940) | ACAACACGATGGTGTCTGGGA---C---ACTCAGGC-ACGCGGTCTGGCACC-CATATGGCTGCATTTC---AGGATGCGGACGCACAGCGCGAAG    | (2231) | GCTTGTAATTGTCTGTTGGACAAATTGTCACTGTGCAAAGGAAATTAAGGAGAGTGTTCAGACATTCTTTAAGCTTGTAATAATAATTTTGTGCTT   |      |      |      |      |      |      |      |      |  |  |  |  |  |  |  |
|                                              |        | Section 75                                                                                          |        |                                                                                                    |      |      |      |      |      |      |      |      |  |  |  |  |  |  |  |
| lambda NC_001416.1<br>SARS-CoV-2 NC_045512.2 | (7179) | 7179                                                                                                | 7190   | 7200                                                                                               | 7210 | 7220 | 7230 | 7240 | 7250 | 7260 | 7275 |      |  |  |  |  |  |  |  |
|                                              | (7024) | GCACTTAACGCTCTCTGCCCGTTACCCGAAAACTGGGTGACCAACGGCGATCCGGCGCGTGAATTCAACCATGATTCAGTCAGCACCGCTGATGCTGCT | (2328) | TG-TGTG--CTGACTCTATCATTATTGGTGGAGCTAAACTTAAGGCT---TGAAATTTAGGTGAACCATTTGTCAACGCACTCAAAGGGATGTGTACA |      |      |      |      |      |      |      |      |  |  |  |  |  |  |  |
|                                              |        | Section 76                                                                                          |        |                                                                                                    |      |      |      |      |      |      |      |      |  |  |  |  |  |  |  |
| lambda NC_001416.1<br>SARS-CoV-2 NC_045512.2 | (7276) | 7276                                                                                                | 7290   | 7300                                                                                               | 7310 | 7320 | 7330 | 7340 | 7350 | 7360 | 7372 |      |  |  |  |  |  |  |  |
|                                              | (7121) | GGCTGACCCTGATGAGTTTCGTGTCGTACAACTGGCGTAATCATGGCCCTTCG---GGGCATTGTTTCTCTGTGGAGGAGTCATGACGAAAAT       | (2418) | GAAAGTGT-GTTAAATC-----CAGAGAAAGAA-CT-GGCTACTCATGCTCTAAAAGCCCCAAA---AGAAATTATCTCTTTAGAG---GGGAT     |      |      |      |      |      |      |      |      |  |  |  |  |  |  |  |
|                                              |        | Section 77                                                                                          |        |                                                                                                    |      |      |      |      |      |      |      |      |  |  |  |  |  |  |  |
| lambda NC_001416.1<br>SARS-CoV-2 NC_045512.2 | (7373) | 7373                                                                                                | 7380   | 7390                                                                                               | 7400 | 7410 | 7420 | 7430 | 7440 | 7450 | 7469 |      |  |  |  |  |  |  |  |
|                                              | (7214) | GAACTGATTTGCCGTCTCCGCTC---GCTG--GGTGAAACAACTGAACCGGTGATGTACAGCTTGACGGGACGAAAGAGAAGCTGGCGCTCCGTGTGGC | (2499) | AAACACTTCCACAGAAGTTTAAACAGAGGAAGTTGTCTTTGAAAACCTGGTGTATTTACAAACATTAG--AACAACTACTAGTGAACTGTTGAAGCT  |      |      |      |      |      |      |      |      |  |  |  |  |  |  |  |

## SARS-CoV-2 &amp; lambda.apr

|                        |        |               |            |                |                |              |              |           |                |           |                 |               |            |            |           |             |       |
|------------------------|--------|---------------|------------|----------------|----------------|--------------|--------------|-----------|----------------|-----------|-----------------|---------------|------------|------------|-----------|-------------|-------|
|                        |        |               |            |                |                |              |              |           |                |           |                 | Section 78    |            |            |           |             |       |
|                        | (7470) | 7470          | 7480       | 7490           | 7500           | 7510         | 7520         | 7530      | 7540           | 7550      | 7566            |               |            |            |           |             |       |
| lambda NC_001416.1     | (7306) | AGAGCTGAAA    | GAGGAGCTT  | GATG-ACACGGAT  | GAAACTGCCGGTCA | GGA          | CACCCCTCTCAG | CCGG      | GAAAA          | TGTGCTGAC | CGGACA          | TGAAAA        | TGAGGT     |            |           |             |       |
| SARS-CoV-2 NC_045512.2 | (2594) | CCATTGCTTG    | GTA-CACCA  | GTTTGTATTAAACG | GCTTA----      | TGTTGCT      | GAAATCAAAGA  | CACA      | GAAAA          | -GTACTGTG | CCT--           | TGACCTA       | TATAT      |            |           |             |       |
|                        |        |               |            |                |                |              |              |           |                |           |                 | Section 79    |            |            |           |             |       |
|                        | (7567) | 7567          | 7580       | 7590           | 7600           | 7610         | 7620         | 7630      | 7640           | 7650      | 7663            |               |            |            |           |             |       |
| lambda NC_001416.1     | (7402) | GGGATCAGCG    | CAGC       | CGGATAC        | CGTGAT-TCT     | GATACGT      | CTGAAC       | TGGTCA    | CGGT           | CGTG      | GCCAC           | TGGTGA        | AGCTG      | CATACT     | GATGC     | CACTTCAC--  | GCC   |
| SARS-CoV-2 NC_045512.2 | (2683) | GATGGTA--A    | CAAA       | CAATAC         | CTTCACAC       | TCAAAGGCG    | GTGC-AC      | CAACAA    | AGGT           | TACT      | TTTGG           | TGATGA        | CAC-TGTG   | ATA        | GAG       | -TGCAAGGTTA | CA    |
|                        |        |               |            |                |                |              |              |           |                |           |                 | Section 80    |            |            |           |             |       |
|                        | (7664) | 7664          | 7670       | 7680           | 7690           | 7700         | 7710         | 7720      | 7730           | 7740      | 7750            | 7760          |            |            |           |             |       |
| lambda NC_001416.1     | (7496) | ACGCGGGATGA   | ACCTGT     | TGGCA          | TTTGTGCTG      | CCG--G       | GAACGG       | CGTTTCGTG | TCTCTG         | -CCGGTG   | TGGCAGC         | CGAAATGACA    | -GAGCG     | CGGCC      | -TGGC     |             |       |
| SARS-CoV-2 NC_045512.2 | (2775) | AGAGTGTGAAT   | ATCAC      | TT--TT         | GAACTTGAT      | GAAAG        | GATTGATAA    | AGTACT    | TAA            | TGAGAAG-- | TGCTCTGCT       | ATACAGTT      | GAACT      | CGGTACAG   | GAA       |             |       |
|                        |        |               |            |                |                |              |              |           |                |           |                 | Section 81    |            |            |           |             |       |
|                        | (7761) | 7761          | 7770       | 7780           | 7790           | 7800         | 7810         | 7820      | 7830           | 7840      | 7857            |               |            |            |           |             |       |
| lambda NC_001416.1     | (7588) | CAGAAATGCAAT  | TAA        | CGGGAGGCGC     | TGTGCTGAT      | TTTGATAC     | CCCTGTT      | CGATGCTG  | CCAT           | TGCG      | CGCCG           | ATGAAACG      | ATACG      | CGGGTACAT  | TGGGAA    |             |       |
| SARS-CoV-2 NC_045512.2 | (2867) | GTA           | AATGAGT    | TCGC-CTG--     | TGTTGT         | GCAGAT       | GTGTCA       | TAAAAA    | CTT            | TGCA      | AA              | CCAGTATCT     | GATTACT--  | TACACCA    | -CTGGGCAT | TGAT-T      |       |
|                        |        |               |            |                |                |              |              |           |                |           |                 | Section 82    |            |            |           |             |       |
|                        | (7858) | 7858          | 7870       | 7880           | 7890           | 7900         | 7910         | 7920      | 7930           | 7940      | 7954            |               |            |            |           |             |       |
| lambda NC_001416.1     | (7685) | CGTCAGCCACC-- | ATACAT     | CCGGTGAG       | CAGTCAGG       | TGCGGT       | GATACG       | TGGTGTT   | TTT            | GATGACC   | CTGAAA          | ATATCAGCT     | TATG       | CCGGAC     | AGGGCGTG  |             |       |
| SARS-CoV-2 NC_045512.2 | (2955) | TAGAT         | GAGTGGAGTA | TGGCTA         | CATACTA        | CTTATT--     | TGATGAG---   | TC        | TGGTGAG        | TTTAA     | ATTGG           | CTTCA         | ATATGTAT   | TGTTCTTTCT | A         | CCC-TCC     |       |
|                        |        |               |            |                |                |              |              |           |                |           |                 | Section 83    |            |            |           |             |       |
|                        | (7955) | 7955          | 7960       | 7970           | 7980           | 7990         | 8000         | 8010      | 8020           | 8030      | 8040            | 8051          |            |            |           |             |       |
| lambda NC_001416.1     | (7780) | CCCGTTGAAG    | GCTCC      | AGCCC          | GTCCC          | TGT          | TTGTCC       | GACTGAT   | GAGG           | TGCGG     | CAGCTG          | CGGCGTGGAGAC  | ACGCTGA-CC | ATCG       | GTGAGGA   | AAAT        | TTC   |
| SARS-CoV-2 NC_045512.2 | (3046) | AGATGAGGAT    | GAAGA      | AGAAG          | GTGAT          | TGT          | GAAGAA       | GAA---    | GAGTT-TG       | AGCCAT    | CAAC            | TCAATATGAGTAT | GGTACTGA   | AGAT       | GATTACC   | AA          | GGTAA |
|                        |        |               |            |                |                |              |              |           |                |           |                 | Section 84    |            |            |           |             |       |
|                        | (8052) | 8052          | 8060       | 8070           | 8080           | 8090         | 8100         | 8110      | 8120           | 8130      | 8148            |               |            |            |           |             |       |
| lambda NC_001416.1     | (7876) | TGGGTAGAT     | TCGGGT     | TTGCC          | GATGATGG       | CGGAAG       | TGTCATCTC    | TGGCTTG   | GACGGG         | CGTAC     | CGCCTGCCGTTA    | ACCGTCGCC---- | GCTGA      | AA         |           |             |       |
| SARS-CoV-2 NC_045512.2 | (3139) | --ACC--TT     | TGGAA      | TTTGGT         | GCCA----       | CTTCTGCTG--- | CTCTTCAACCT  | GAA--GAAG | AGCAAGAAGAAGAT | TGGT      | TAGATGATGATAGTC | AA            |            |            |           |             |       |

## SARS-CoV-2 &amp; lambda.apr

|                        |        |        |      |       |       |        |       |         |       |      |      |            |         |    |     |      |      |    |        |    |       |        |      |    |      |      |       |    |       |    |   |     |   |    |   |   |   |   |   |   |   |   |   |   |   |   |   |   |   |   |   |   |   |   |   |   |   |   |   |   |   |   |   |   |   |   |   |   |   |   |   |   |   |   |   |   |   |   |   |   |   |   |   |   |   |   |   |   |   |   |   |   |   |   |   |   |   |   |   |   |   |   |   |   |   |   |   |   |   |   |   |   |   |   |   |   |   |   |   |   |   |   |   |   |   |   |   |   |   |   |   |   |   |   |   |   |   |   |   |   |   |   |   |   |   |   |   |   |   |   |   |   |   |   |   |   |   |   |   |   |   |   |   |   |   |   |   |   |   |   |   |   |   |   |   |   |   |   |   |   |   |   |   |   |   |   |   |   |   |   |   |   |   |   |   |   |   |   |   |   |   |   |   |   |   |   |   |   |   |   |   |   |   |   |   |   |   |   |   |   |   |   |   |   |   |   |   |   |   |   |   |   |   |   |   |   |   |   |   |   |   |   |   |   |   |   |   |   |   |   |   |   |   |   |   |   |   |   |   |   |   |   |   |   |   |   |   |   |   |   |   |   |   |   |   |   |   |   |   |   |   |   |   |   |   |   |   |   |   |   |   |   |   |   |   |   |   |   |   |   |   |   |   |   |   |   |   |   |   |   |   |   |   |   |   |   |   |   |   |   |   |   |   |   |   |   |   |   |   |   |   |   |   |   |   |   |   |   |   |   |   |   |   |   |   |   |   |   |   |   |   |   |   |   |   |   |   |   |   |   |   |   |   |   |   |   |   |   |   |   |   |   |   |   |   |   |   |   |   |   |   |   |   |   |   |   |   |   |   |   |   |   |   |   |   |   |   |   |   |   |   |   |   |   |   |   |   |   |   |   |   |   |   |   |   |   |   |   |   |   |   |   |   |   |   |   |   |   |   |   |   |   |   |   |   |   |   |   |   |   |   |   |   |   |   |   |   |   |   |   |   |   |   |   |   |   |   |   |   |   |   |   |   |   |   |   |   |   |   |   |   |   |   |   |   |   |   |   |   |   |   |   |   |   |   |   |   |   |   |   |   |   |   |   |   |   |   |   |   |   |   |   |   |   |   |   |   |   |   |   |   |   |   |   |   |   |   |   |   |   |   |   |   |   |   |   |   |   |   |   |   |   |   |   |   |   |   |   |   |   |   |   |   |   |   |   |   |   |   |   |   |   |   |   |   |   |   |   |   |   |   |   |   |   |   |   |   |   |   |   |   |   |   |   |   |   |   |   |   |   |   |   |   |   |   |   |   |   |   |   |   |   |   |   |   |   |   |   |   |   |   |   |   |   |   |   |   |   |   |   |   |   |   |   |   |   |   |   |   |   |   |   |   |   |   |   |   |   |   |   |   |   |   |   |   |   |   |   |   |   |   |   |   |   |   |   |   |   |   |   |   |   |   |   |   |   |   |   |   |   |   |   |   |   |   |   |   |   |   |   |   |   |   |   |   |   |   |   |   |   |   |   |   |   |   |   |   |   |   |   |   |   |   |   |   |   |   |   |   |   |   |   |   |   |   |   |   |   |   |   |   |   |   |   |   |   |   |   |   |   |   |   |   |   |   |   |   |   |   |   |   |   |   |   |   |   |   |   |   |   |   |   |   |   |   |   |   |   |   |   |   |   |   |   |   |   |   |   |   |   |   |   |   |   |   |   |   |   |   |   |   |   |   |   |   |   |   |   |   |   |   |   |   |   |   |   |   |   |   |   |   |   |   |   |   |   |   |   |   |   |   |   |   |   |   |   |   |   |   |   |   |   |   |   |   |   |   |   |   |   |   |   |   |   |   |   |   |   |   |   |   |   |   |   |   |   |   |   |   |   |   |   |   |   |   |   |   |   |   |   |   |   |   |   |   |   |   |   |   |   |   |   |   |   |   |   |   |   |   |   |   |   |   |   |   |   |   |   |   |   |   |   |   |   |   |   |   |   |   |   |   |   |   |   |   |   |   |   |   |   |   |   |   |   |   |   |   |   |   |   |   |   |   |   |   |   |   |   |   |   |   |   |   |   |   |   |   |   |   |   |   |   |   |   |   |   |   |   |   |   |   |   |   |   |   |   |   |   |   |   |   |   |   |   |   |   |   |   |   |   |   |   |   |   |   |   |   |   |   |   |   |   |   |   |   |   |   |   |   |   |   |   |   |   |   |   |   |   |   |   |   |   |   |   |   |   |   |   |   |   |   |   |   |   |   |   |   |   |   |   |   |   |   |   |   |   |   |   |   |   |   |   |   |   |   |   |   |   |   |   |   |   |   |   |   |   |   |   |   |   |   |   |   |   |   |   |   |   |   |   |   |   |   |   |   |   |   |   |   |   |   |   |   |   |   |   |   |   |   |   |   |   |   |   |   |   |   |   |   |   |   |   |   |   |   |   |   |   |   |   |   |   |   |   |   |   |   |   |   |   |   |   |   |   |   |   |   |   |   |   |   |   |   |   |   |   |   |   |   |   |   |   |   |   |   |   |   |   |   |   |   |   |   |   |   |   |   |   |   |   |   |   |   |   |   |   |   |   |   |   |   |   |   |   |   |   |   |   |   |   |   |   |   |   |   |   |   |   |   |   |
|------------------------|--------|--------|------|-------|-------|--------|-------|---------|-------|------|------|------------|---------|----|-----|------|------|----|--------|----|-------|--------|------|----|------|------|-------|----|-------|----|---|-----|---|----|---|---|---|---|---|---|---|---|---|---|---|---|---|---|---|---|---|---|---|---|---|---|---|---|---|---|---|---|---|---|---|---|---|---|---|---|---|---|---|---|---|---|---|---|---|---|---|---|---|---|---|---|---|---|---|---|---|---|---|---|---|---|---|---|---|---|---|---|---|---|---|---|---|---|---|---|---|---|---|---|---|---|---|---|---|---|---|---|---|---|---|---|---|---|---|---|---|---|---|---|---|---|---|---|---|---|---|---|---|---|---|---|---|---|---|---|---|---|---|---|---|---|---|---|---|---|---|---|---|---|---|---|---|---|---|---|---|---|---|---|---|---|---|---|---|---|---|---|---|---|---|---|---|---|---|---|---|---|---|---|---|---|---|---|---|---|---|---|---|---|---|---|---|---|---|---|---|---|---|---|---|---|---|---|---|---|---|---|---|---|---|---|---|---|---|---|---|---|---|---|---|---|---|---|---|---|---|---|---|---|---|---|---|---|---|---|---|---|---|---|---|---|---|---|---|---|---|---|---|---|---|---|---|---|---|---|---|---|---|---|---|---|---|---|---|---|---|---|---|---|---|---|---|---|---|---|---|---|---|---|---|---|---|---|---|---|---|---|---|---|---|---|---|---|---|---|---|---|---|---|---|---|---|---|---|---|---|---|---|---|---|---|---|---|---|---|---|---|---|---|---|---|---|---|---|---|---|---|---|---|---|---|---|---|---|---|---|---|---|---|---|---|---|---|---|---|---|---|---|---|---|---|---|---|---|---|---|---|---|---|---|---|---|---|---|---|---|---|---|---|---|---|---|---|---|---|---|---|---|---|---|---|---|---|---|---|---|---|---|---|---|---|---|---|---|---|---|---|---|---|---|---|---|---|---|---|---|---|---|---|---|---|---|---|---|---|---|---|---|---|---|---|---|---|---|---|---|---|---|---|---|---|---|---|---|---|---|---|---|---|---|---|---|---|---|---|---|---|---|---|---|---|---|---|---|---|---|---|---|---|---|---|---|---|---|---|---|---|---|---|---|---|---|---|---|---|---|---|---|---|---|---|---|---|---|---|---|---|---|---|---|---|---|---|---|---|---|---|---|---|---|---|---|---|---|---|---|---|---|---|---|---|---|---|---|---|---|---|---|---|---|---|---|---|---|---|---|---|---|---|---|---|---|---|---|---|---|---|---|---|---|---|---|---|---|---|---|---|---|---|---|---|---|---|---|---|---|---|---|---|---|---|---|---|---|---|---|---|---|---|---|---|---|---|---|---|---|---|---|---|---|---|---|---|---|---|---|---|---|---|---|---|---|---|---|---|---|---|---|---|---|---|---|---|---|---|---|---|---|---|---|---|---|---|---|---|---|---|---|---|---|---|---|---|---|---|---|---|---|---|---|---|---|---|---|---|---|---|---|---|---|---|---|---|---|---|---|---|---|---|---|---|---|---|---|---|---|---|---|---|---|---|---|---|---|---|---|---|---|---|---|---|---|---|---|---|---|---|---|---|---|---|---|---|---|---|---|---|---|---|---|---|---|---|---|---|---|---|---|---|---|---|---|---|---|---|---|---|---|---|---|---|---|---|---|---|---|---|---|---|---|---|---|---|---|---|---|---|---|---|---|---|---|---|---|---|---|---|---|---|---|---|---|---|---|---|---|---|---|---|---|---|---|---|---|---|---|---|---|---|---|---|---|---|---|---|---|---|---|---|---|---|---|---|---|---|---|---|---|---|---|---|---|---|---|---|---|---|---|---|---|---|---|---|---|---|---|---|---|---|---|---|---|---|---|---|---|---|---|---|---|---|---|---|---|---|---|---|---|---|---|---|---|---|---|---|---|---|---|---|---|---|---|---|---|---|---|---|---|---|---|---|---|---|---|---|---|---|---|---|---|---|---|---|---|---|---|---|---|---|---|---|---|---|---|---|---|---|---|---|---|---|---|---|---|---|---|---|---|---|---|---|---|---|---|---|---|---|---|---|---|---|---|---|---|---|---|---|---|---|---|---|---|---|---|---|---|---|---|---|---|---|---|---|---|---|---|---|---|---|---|---|---|---|---|---|---|---|---|---|---|---|---|---|---|---|---|---|---|---|---|---|---|---|---|---|---|---|---|---|---|---|---|---|---|---|---|---|---|---|---|---|---|---|---|---|---|---|---|---|---|---|---|---|---|---|---|---|---|---|---|---|---|---|---|---|---|---|---|---|---|---|---|---|---|---|---|---|---|---|---|---|---|---|---|---|---|---|---|---|---|---|---|---|---|---|---|---|---|---|---|---|---|---|---|---|---|---|---|---|---|---|---|---|---|---|---|---|---|---|---|---|---|---|---|---|---|---|---|---|---|---|---|---|---|---|---|---|---|---|---|---|---|---|---|---|---|---|---|---|---|---|---|---|---|---|---|---|---|---|---|---|---|---|---|---|---|---|---|---|---|---|---|---|---|---|---|---|---|---|---|---|---|---|---|---|---|---|---|---|---|---|---|---|---|---|---|---|---|---|---|---|---|---|---|---|---|---|---|---|---|---|---|---|---|---|---|---|---|---|---|---|---|---|---|---|---|---|---|---|---|---|---|---|---|---|
|                        |        |        |      |       |       |        |       |         |       |      |      | Section 85 |         |    |     |      |      |    |        |    |       |        |      |    |      |      |       |    |       |    |   |     |   |    |   |   |   |   |   |   |   |   |   |   |   |   |   |   |   |   |   |   |   |   |   |   |   |   |   |   |   |   |   |   |   |   |   |   |   |   |   |   |   |   |   |   |   |   |   |   |   |   |   |   |   |   |   |   |   |   |   |   |   |   |   |   |   |   |   |   |   |   |   |   |   |   |   |   |   |   |   |   |   |   |   |   |   |   |   |   |   |   |   |   |   |   |   |   |   |   |   |   |   |   |   |   |   |   |   |   |   |   |   |   |   |   |   |   |   |   |   |   |   |   |   |   |   |   |   |   |   |   |   |   |   |   |   |   |   |   |   |   |   |   |   |   |   |   |   |   |   |   |   |   |   |   |   |   |   |   |   |   |   |   |   |   |   |   |   |   |   |   |   |   |   |   |   |   |   |   |   |   |   |   |   |   |   |   |   |   |   |   |   |   |   |   |   |   |   |   |   |   |   |   |   |   |   |   |   |   |   |   |   |   |   |   |   |   |   |   |   |   |   |   |   |   |   |   |   |   |   |   |   |   |   |   |   |   |   |   |   |   |   |   |   |   |   |   |   |   |   |   |   |   |   |   |   |   |   |   |   |   |   |   |   |   |   |   |   |   |   |   |   |   |   |   |   |   |   |   |   |   |   |   |   |   |   |   |   |   |   |   |   |   |   |   |   |   |   |   |   |   |   |   |   |   |   |   |   |   |   |   |   |   |   |   |   |   |   |   |   |   |   |   |   |   |   |   |   |   |   |   |   |   |   |   |   |   |   |   |   |   |   |   |   |   |   |   |   |   |   |   |   |   |   |   |   |   |   |   |   |   |   |   |   |   |   |   |   |   |   |   |   |   |   |   |   |   |   |   |   |   |   |   |   |   |   |   |   |   |   |   |   |   |   |   |   |   |   |   |   |   |   |   |   |   |   |   |   |   |   |   |   |   |   |   |   |   |   |   |   |   |   |   |   |   |   |   |   |   |   |   |   |   |   |   |   |   |   |   |   |   |   |   |   |   |   |   |   |   |   |   |   |   |   |   |   |   |   |   |   |   |   |   |   |   |   |   |   |   |   |   |   |   |   |   |   |   |   |   |   |   |   |   |   |   |   |   |   |   |   |   |   |   |   |   |   |   |   |   |   |   |   |   |   |   |   |   |   |   |   |   |   |   |   |   |   |   |   |   |   |   |   |   |   |   |   |   |   |   |   |   |   |   |   |   |   |   |   |   |   |   |   |   |   |   |   |   |   |   |   |   |   |   |   |   |   |   |   |   |   |   |   |   |   |   |   |   |   |   |   |   |   |   |   |   |   |   |   |   |   |   |   |   |   |   |   |   |   |   |   |   |   |   |   |   |   |   |   |   |   |   |   |   |   |   |   |   |   |   |   |   |   |   |   |   |   |   |   |   |   |   |   |   |   |   |   |   |   |   |   |   |   |   |   |   |   |   |   |   |   |   |   |   |   |   |   |   |   |   |   |   |   |   |   |   |   |   |   |   |   |   |   |   |   |   |   |   |   |   |   |   |   |   |   |   |   |   |   |   |   |   |   |   |   |   |   |   |   |   |   |   |   |   |   |   |   |   |   |   |   |   |   |   |   |   |   |   |   |   |   |   |   |   |   |   |   |   |   |   |   |   |   |   |   |   |   |   |   |   |   |   |   |   |   |   |   |   |   |   |   |   |   |   |   |   |   |   |   |   |   |   |   |   |   |   |   |   |   |   |   |   |   |   |   |   |   |   |   |   |   |   |   |   |   |   |   |   |   |   |   |   |   |   |   |   |   |   |   |   |   |   |   |   |   |   |   |   |   |   |   |   |   |   |   |   |   |   |   |   |   |   |   |   |   |   |   |   |   |   |   |   |   |   |   |   |   |   |   |   |   |   |   |   |   |   |   |   |   |   |   |   |   |   |   |   |   |   |   |   |   |   |   |   |   |   |   |   |   |   |   |   |   |   |   |   |   |   |   |   |   |   |   |   |   |   |   |   |   |   |   |   |   |   |   |   |   |   |   |   |   |   |   |   |   |   |   |   |   |   |   |   |   |   |   |   |   |   |   |   |   |   |   |   |   |   |   |   |   |   |   |   |   |   |   |   |   |   |   |   |   |   |   |   |   |   |   |   |   |   |   |   |   |   |   |   |   |   |   |   |   |   |   |   |   |   |   |   |   |   |   |   |   |   |   |   |   |   |   |   |   |   |   |   |   |   |   |   |   |   |   |   |   |   |   |   |   |   |   |   |   |   |   |   |   |   |   |   |   |   |   |   |   |   |   |   |   |   |   |   |   |   |   |   |   |   |   |   |   |   |   |   |   |   |   |   |   |   |   |   |   |   |   |   |   |   |   |   |   |   |   |   |   |   |   |   |   |   |   |   |   |   |   |   |   |   |   |   |   |   |   |   |   |   |   |   |   |   |   |   |   |   |   |   |   |   |   |   |   |   |   |   |   |   |   |   |   |   |   |   |   |   |   |   |   |   |   |   |   |   |   |   |   |   |   |   |   |   |   |   |   |   |   |   |   |   |   |   |   |   |   |   |   |   |   |   |   |   |   |   |   |   |   |   |   |   |   |   |   |   |
|                        | (8149) | 8149   | 8160 | 8170  | 8180  | 8190   | 8200  | 8210    | 8220  | 8230 | 8245 |            |         |    |     |      |      |    |        |    |       |        |      |    |      |      |       |    |       |    |   |     |   |    |   |   |   |   |   |   |   |   |   |   |   |   |   |   |   |   |   |   |   |   |   |   |   |   |   |   |   |   |   |   |   |   |   |   |   |   |   |   |   |   |   |   |   |   |   |   |   |   |   |   |   |   |   |   |   |   |   |   |   |   |   |   |   |   |   |   |   |   |   |   |   |   |   |   |   |   |   |   |   |   |   |   |   |   |   |   |   |   |   |   |   |   |   |   |   |   |   |   |   |   |   |   |   |   |   |   |   |   |   |   |   |   |   |   |   |   |   |   |   |   |   |   |   |   |   |   |   |   |   |   |   |   |   |   |   |   |   |   |   |   |   |   |   |   |   |   |   |   |   |   |   |   |   |   |   |   |   |   |   |   |   |   |   |   |   |   |   |   |   |   |   |   |   |   |   |   |   |   |   |   |   |   |   |   |   |   |   |   |   |   |   |   |   |   |   |   |   |   |   |   |   |   |   |   |   |   |   |   |   |   |   |   |   |   |   |   |   |   |   |   |   |   |   |   |   |   |   |   |   |   |   |   |   |   |   |   |   |   |   |   |   |   |   |   |   |   |   |   |   |   |   |   |   |   |   |   |   |   |   |   |   |   |   |   |   |   |   |   |   |   |   |   |   |   |   |   |   |   |   |   |   |   |   |   |   |   |   |   |   |   |   |   |   |   |   |   |   |   |   |   |   |   |   |   |   |   |   |   |   |   |   |   |   |   |   |   |   |   |   |   |   |   |   |   |   |   |   |   |   |   |   |   |   |   |   |   |   |   |   |   |   |   |   |   |   |   |   |   |   |   |   |   |   |   |   |   |   |   |   |   |   |   |   |   |   |   |   |   |   |   |   |   |   |   |   |   |   |   |   |   |   |   |   |   |   |   |   |   |   |   |   |   |   |   |   |   |   |   |   |   |   |   |   |   |   |   |   |   |   |   |   |   |   |   |   |   |   |   |   |   |   |   |   |   |   |   |   |   |   |   |   |   |   |   |   |   |   |   |   |   |   |   |   |   |   |   |   |   |   |   |   |   |   |   |   |   |   |   |   |   |   |   |   |   |   |   |   |   |   |   |   |   |   |   |   |   |   |   |   |   |   |   |   |   |   |   |   |   |   |   |   |   |   |   |   |   |   |   |   |   |   |   |   |   |   |   |   |   |   |   |   |   |   |   |   |   |   |   |   |   |   |   |   |   |   |   |   |   |   |   |   |   |   |   |   |   |   |   |   |   |   |   |   |   |   |   |   |   |   |   |   |   |   |   |   |   |   |   |   |   |   |   |   |   |   |   |   |   |   |   |   |   |   |   |   |   |   |   |   |   |   |   |   |   |   |   |   |   |   |   |   |   |   |   |   |   |   |   |   |   |   |   |   |   |   |   |   |   |   |   |   |   |   |   |   |   |   |   |   |   |   |   |   |   |   |   |   |   |   |   |   |   |   |   |   |   |   |   |   |   |   |   |   |   |   |   |   |   |   |   |   |   |   |   |   |   |   |   |   |   |   |   |   |   |   |   |   |   |   |   |   |   |   |   |   |   |   |   |   |   |   |   |   |   |   |   |   |   |   |   |   |   |   |   |   |   |   |   |   |   |   |   |   |   |   |   |   |   |   |   |   |   |   |   |   |   |   |   |   |   |   |   |   |   |   |   |   |   |   |   |   |   |   |   |   |   |   |   |   |   |   |   |   |   |   |   |   |   |   |   |   |   |   |   |   |   |   |   |   |   |   |   |   |   |   |   |   |   |   |   |   |   |   |   |   |   |   |   |   |   |   |   |   |   |   |   |   |   |   |   |   |   |   |   |   |   |   |   |   |   |   |   |   |   |   |   |   |   |   |   |   |   |   |   |   |   |   |   |   |   |   |   |   |   |   |   |   |   |   |   |   |   |   |   |   |   |   |   |   |   |   |   |   |   |   |   |   |   |   |   |   |   |   |   |   |   |   |   |   |   |   |   |   |   |   |   |   |   |   |   |   |   |   |   |   |   |   |   |   |   |   |   |   |   |   |   |   |   |   |   |   |   |   |   |   |   |   |   |   |   |   |   |   |   |   |   |   |   |   |   |   |   |   |   |   |   |   |   |   |   |   |   |   |   |   |   |   |   |   |   |   |   |   |   |   |   |   |   |   |   |   |   |   |   |   |   |   |   |   |   |   |   |   |   |   |   |   |   |   |   |   |   |   |   |   |   |   |   |   |   |   |   |   |   |   |   |   |   |   |   |   |   |   |   |   |   |   |   |   |   |   |   |   |   |   |   |   |   |   |   |   |   |   |   |   |   |   |   |   |   |   |   |   |   |   |   |   |   |   |   |   |   |   |   |   |   |   |   |   |   |   |   |   |   |   |   |   |   |   |   |   |   |   |   |   |   |   |   |   |   |   |   |   |   |   |   |   |   |   |   |   |   |   |   |   |   |   |   |   |   |   |   |   |   |   |   |   |   |   |   |   |   |   |   |   |   |   |   |   |   |   |   |   |   |   |   |   |   |   |   |   |   |   |   |   |   |   |   |   |   |   |   |   |   |   |   |   |   |   |   |   |   |   |   |   |   |   |   |   |   |   |   |   |   |   |   |
| lambda NC_001416.1     | (7968) | --GGGG | GATG | TATGG | CCAT  | AAAAGG | TCTTG | AGCAGG  | CCGTT | GAA  | AAAC | CT         | CAGCCGT | AT | CAG | GCAA | AACG | GC | GGT    | G  | CCTGG | T      | GCCG | CC | G    | CAAT | G     | CC | AT    |    |   |     |   |    |   |   |   |   |   |   |   |   |   |   |   |   |   |   |   |   |   |   |   |   |   |   |   |   |   |   |   |   |   |   |   |   |   |   |   |   |   |   |   |   |   |   |   |   |   |   |   |   |   |   |   |   |   |   |   |   |   |   |   |   |   |   |   |   |   |   |   |   |   |   |   |   |   |   |   |   |   |   |   |   |   |   |   |   |   |   |   |   |   |   |   |   |   |   |   |   |   |   |   |   |   |   |   |   |   |   |   |   |   |   |   |   |   |   |   |   |   |   |   |   |   |   |   |   |   |   |   |   |   |   |   |   |   |   |   |   |   |   |   |   |   |   |   |   |   |   |   |   |   |   |   |   |   |   |   |   |   |   |   |   |   |   |   |   |   |   |   |   |   |   |   |   |   |   |   |   |   |   |   |   |   |   |   |   |   |   |   |   |   |   |   |   |   |   |   |   |   |   |   |   |   |   |   |   |   |   |   |   |   |   |   |   |   |   |   |   |   |   |   |   |   |   |   |   |   |   |   |   |   |   |   |   |   |   |   |   |   |   |   |   |   |   |   |   |   |   |   |   |   |   |   |   |   |   |   |   |   |   |   |   |   |   |   |   |   |   |   |   |   |   |   |   |   |   |   |   |   |   |   |   |   |   |   |   |   |   |   |   |   |   |   |   |   |   |   |   |   |   |   |   |   |   |   |   |   |   |   |   |   |   |   |   |   |   |   |   |   |   |   |   |   |   |   |   |   |   |   |   |   |   |   |   |   |   |   |   |   |   |   |   |   |   |   |   |   |   |   |   |   |   |   |   |   |   |   |   |   |   |   |   |   |   |   |   |   |   |   |   |   |   |   |   |   |   |   |   |   |   |   |   |   |   |   |   |   |   |   |   |   |   |   |   |   |   |   |   |   |   |   |   |   |   |   |   |   |   |   |   |   |   |   |   |   |   |   |   |   |   |   |   |   |   |   |   |   |   |   |   |   |   |   |   |   |   |   |   |   |   |   |   |   |   |   |   |   |   |   |   |   |   |   |   |   |   |   |   |   |   |   |   |   |   |   |   |   |   |   |   |   |   |   |   |   |   |   |   |   |   |   |   |   |   |   |   |   |   |   |   |   |   |   |   |   |   |   |   |   |   |   |   |   |   |   |   |   |   |   |   |   |   |   |   |   |   |   |   |   |   |   |   |   |   |   |   |   |   |   |   |   |   |   |   |   |   |   |   |   |   |   |   |   |   |   |   |   |   |   |   |   |   |   |   |   |   |   |   |   |   |   |   |   |   |   |   |   |   |   |   |   |   |   |   |   |   |   |   |   |   |   |   |   |   |   |   |   |   |   |   |   |   |   |   |   |   |   |   |   |   |   |   |   |   |   |   |   |   |   |   |   |   |   |   |   |   |   |   |   |   |   |   |   |   |   |   |   |   |   |   |   |   |   |   |   |   |   |   |   |   |   |   |   |   |   |   |   |   |   |   |   |   |   |   |   |   |   |   |   |   |   |   |   |   |   |   |   |   |   |   |   |   |   |   |   |   |   |   |   |   |   |   |   |   |   |   |   |   |   |   |   |   |   |   |   |   |   |   |   |   |   |   |   |   |   |   |   |   |   |   |   |   |   |   |   |   |   |   |   |   |   |   |   |   |   |   |   |   |   |   |   |   |   |   |   |   |   |   |   |   |   |   |   |   |   |   |   |   |   |   |   |   |   |   |   |   |   |   |   |   |   |   |   |   |   |   |   |   |   |   |   |   |   |   |   |   |   |   |   |   |   |   |   |   |   |   |   |   |   |   |   |   |   |   |   |   |   |   |   |   |   |   |   |   |   |   |   |   |   |   |   |   |   |   |   |   |   |   |   |   |   |   |   |   |   |   |   |   |   |   |   |   |   |   |   |   |   |   |   |   |   |   |   |   |   |   |   |   |   |   |   |   |   |   |   |   |   |   |   |   |   |   |   |   |   |   |   |   |   |   |   |   |   |   |   |   |   |   |   |   |   |   |   |   |   |   |   |   |   |   |   |   |   |   |   |   |   |   |   |   |   |   |   |   |   |   |   |   |   |   |   |   |   |   |   |   |   |   |   |   |   |   |   |   |   |   |   |   |   |   |   |   |   |   |   |   |   |   |   |   |   |   |   |   |   |   |   |   |   |   |   |   |   |   |   |   |   |   |   |   |   |   |   |   |   |   |   |   |   |   |   |   |   |   |   |   |   |   |   |   |   |   |   |   |   |   |   |   |   |   |   |   |   |   |   |   |   |   |   |   |   |   |   |   |   |   |   |   |   |   |   |   |   |   |   |   |   |   |   |   |   |   |   |   |   |   |   |   |   |   |   |   |   |   |   |   |   |   |   |   |   |   |   |   |   |   |   |   |   |   |   |   |   |   |   |   |   |   |   |   |   |   |   |   |   |   |   |   |   |   |   |   |   |   |   |   |   |   |   |   |   |   |   |   |   |   |   |   |   |   |   |   |   |   |   |   |   |   |   |   |   |   |   |   |   |   |   |   |   |   |   |   |   |   |   |   |   |   |   |   |   |   |   |   |   |   |   |   |   |   |   |   |   |   |   |   |   |   |
| SARS-CoV-2 NC_045512.2 | (3221) | CAAAC  | GT   | TG    | GTCAA | CA     | AG    | ACGGCAG | -     | TG   | --   | AGGACA     | ATCA    | G  | AC  | AACT | TA   | C  | TATTCA | AA | CA    | ATTGTT | --   | G  | AGGT | T    | CAACC | T  | CAATT | GA | - | GAT | G | GA | A | C |   |   |   |   |   |   |   |   |   |   |   |   |   |   |   |   |   |   |   |   |   |   |   |   |   |   |   |   |   |   |   |   |   |   |   |   |   |   |   |   |   |   |   |   |   |   |   |   |   |   |   |   |   |   |   |   |   |   |   |   |   |   |   |   |   |   |   |   |   |   |   |   |   |   |   |   |   |   |   |   |   |   |   |   |   |   |   |   |   |   |   |   |   |   |   |   |   |   |   |   |   |   |   |   |   |   |   |   |   |   |   |   |   |   |   |   |   |   |   |   |   |   |   |   |   |   |   |   |   |   |   |   |   |   |   |   |   |   |   |   |   |   |   |   |   |   |   |   |   |   |   |   |   |   |   |   |   |   |   |   |   |   |   |   |   |   |   |   |   |   |   |   |   |   |   |   |   |   |   |   |   |   |   |   |   |   |   |   |   |   |   |   |   |   |   |   |   |   |   |   |   |   |   |   |   |   |   |   |   |   |   |   |   |   |   |   |   |   |   |   |   |   |   |   |   |   |   |   |   |   |   |   |   |   |   |   |   |   |   |   |   |   |   |   |   |   |   |   |   |   |   |   |   |   |   |   |   |   |   |   |   |   |   |   |   |   |   |   |   |   |   |   |   |   |   |   |   |   |   |   |   |   |   |   |   |   |   |   |   |   |   |   |   |   |   |   |   |   |   |   |   |   |   |   |   |   |   |   |   |   |   |   |   |   |   |   |   |   |   |   |   |   |   |   |   |   |   |   |   |   |   |   |   |   |   |   |   |   |   |   |   |   |   |   |   |   |   |   |   |   |   |   |   |   |   |   |   |   |   |   |   |   |   |   |   |   |   |   |   |   |   |   |   |   |   |   |   |   |   |   |   |   |   |   |   |   |   |   |   |   |   |   |   |   |   |   |   |   |   |   |   |   |   |   |   |   |   |   |   |   |   |   |   |   |   |   |   |   |   |   |   |   |   |   |   |   |   |   |   |   |   |   |   |   |   |   |   |   |   |   |   |   |   |   |   |   |   |   |   |   |   |   |   |   |   |   |   |   |   |   |   |   |   |   |   |   |   |   |   |   |   |   |   |   |   |   |   |   |   |   |   |   |   |   |   |   |   |   |   |   |   |   |   |   |   |   |   |   |   |   |   |   |   |   |   |   |   |   |   |   |   |   |   |   |   |   |   |   |   |   |   |   |   |   |   |   |   |   |   |   |   |   |   |   |   |   |   |   |   |   |   |   |   |   |   |   |   |   |   |   |   |   |   |   |   |   |   |   |   |   |   |   |   |   |   |   |   |   |   |   |   |   |   |   |   |   |   |   |   |   |   |   |   |   |   |   |   |   |   |   |   |   |   |   |   |   |   |   |   |   |   |   |   |   |   |   |   |   |   |   |   |   |   |   |   |   |   |   |   |   |   |   |   |   |   |   |   |   |   |   |   |   |   |   |   |   |   |   |   |   |   |   |   |   |   |   |   |   |   |   |   |   |   |   |   |   |   |   |   |   |   |   |   |   |   |   |   |   |   |   |   |   |   |   |   |   |   |   |   |   |   |   |   |   |   |   |   |   |   |   |   |   |   |   |   |   |   |   |   |   |   |   |   |   |   |   |   |   |   |   |   |   |   |   |   |   |   |   |   |   |   |   |   |   |   |   |   |   |   |   |   |   |   |   |   |   |   |   |   |   |   |   |   |   |   |   |   |   |   |   |   |   |   |   |   |   |   |   |   |   |   |   |   |   |   |   |   |   |   |   |   |   |   |   |   |   |   |   |   |   |   |   |   |   |   |   |   |   |   |   |   |   |   |   |   |   |   |   |   |   |   |   |   |   |   |   |   |   |   |   |   |   |   |   |   |   |   |   |   |   |   |   |   |   |   |   |   |   |   |   |   |   |   |   |   |   |   |   |   |   |   |   |   |   |   |   |   |   |   |   |   |   |   |   |   |   |   |   |   |   |   |   |   |   |   |   |   |   |   |   |   |   |   |   |   |   |   |   |   |   |   |   |   |   |   |   |   |   |   |   |   |   |   |   |   |   |   |   |   |   |   |   |   |   |   |   |   |   |   |   |   |   |   |   |   |   |   |   |   |   |   |   |   |   |   |   |   |   |   |   |   |   |   |   |   |   |   |   |   |   |   |   |   |   |   |   |   |   |   |   |   |   |   |   |   |   |   |   |   |   |   |   |   |   |   |   |   |   |   |   |   |   |   |   |   |   |   |   |   |   |   |   |   |   |   |   |   |   |   |   |   |   |   |   |   |   |   |   |   |   |   |   |   |   |   |   |   |   |   |   |   |   |   |   |   |   |   |   |   |   |   |   |   |   |   |   |   |   |   |   |   |   |   |   |   |   |   |   |   |   |   |   |   |   |   |   |   |   |   |   |   |   |   |   |   |   |   |   |   |   |   |   |   |   |   |   |   |   |   |   |   |   |   |   |   |   |   |   |   |   |   |   |   |   |   |   |   |   |   |   |   |   |   |   |   |   |   |   |   |   |   |   |   |   |   |   |   |   |   |   |   |   |   |   |   |   |   |   |   |   |   |   |   |   |   |   |   |   |   |   |   |   |   |   |
|                        |        |        |      |       |       |        |       |         |       |      |      | Section 86 |         |    |     |      |      |    |        |    |       |        |      |    |      |      |       |    |       |    |   |     |   |    |   |   |   |   |   |   |   |   |   |   |   |   |   |   |   |   |   |   |   |   |   |   |   |   |   |   |   |   |   |   |   |   |   |   |   |   |   |   |   |   |   |   |   |   |   |   |   |   |   |   |   |   |   |   |   |   |   |   |   |   |   |   |   |   |   |   |   |   |   |   |   |   |   |   |   |   |   |   |   |   |   |   |   |   |   |   |   |   |   |   |   |   |   |   |   |   |   |   |   |   |   |   |   |   |   |   |   |   |   |   |   |   |   |   |   |   |   |   |   |   |   |   |   |   |   |   |   |   |   |   |   |   |   |   |   |   |   |   |   |   |   |   |   |   |   |   |   |   |   |   |   |   |   |   |   |   |   |   |   |   |   |   |   |   |   |   |   |   |   |   |   |   |   |   |   |   |   |   |   |   |   |   |   |   |   |   |   |   |   |   |   |   |   |   |   |   |   |   |   |   |   |   |   |   |   |   |   |   |   |   |   |   |   |   |   |   |   |   |   |   |   |   |   |   |   |   |   |   |   |   |   |   |   |   |   |   |   |   |   |   |   |   |   |   |   |   |   |   |   |   |   |   |   |   |   |   |   |   |   |   |   |   |   |   |   |   |   |   |   |   |   |   |   |   |   |   |   |   |   |   |   |   |   |   |   |   |   |   |   |   |   |   |   |   |   |   |   |   |   |   |   |   |   |   |   |   |   |   |   |   |   |   |   |   |   |   |   |   |   |   |   |   |   |   |   |   |   |   |   |   |   |   |   |   |   |   |   |   |   |   |   |   |   |   |   |   |   |   |   |   |   |   |   |   |   |   |   |   |   |   |   |   |   |   |   |   |   |   |   |   |   |   |   |   |   |   |   |   |   |   |   |   |   |   |   |   |   |   |   |   |   |   |   |   |   |   |   |   |   |   |   |   |   |   |   |   |   |   |   |   |   |   |   |   |   |   |   |   |   |   |   |   |   |   |   |   |   |   |   |   |   |   |   |   |   |   |   |   |   |   |   |   |   |   |   |   |   |   |   |   |   |   |   |   |   |   |   |   |   |   |   |   |   |   |   |   |   |   |   |   |   |   |   |   |   |   |   |   |   |   |   |   |   |   |   |   |   |   |   |   |   |   |   |   |   |   |   |   |   |   |   |   |   |   |   |   |   |   |   |   |   |   |   |   |   |   |   |   |   |   |   |   |   |   |   |   |   |   |   |   |   |   |   |   |   |   |   |   |   |   |   |   |   |   |   |   |   |   |   |   |   |   |   |   |   |   |   |   |   |   |   |   |   |   |   |   |   |   |   |   |   |   |   |   |   |   |   |   |   |   |   |   |   |   |   |   |   |   |   |   |   |   |   |   |   |   |   |   |   |   |   |   |   |   |   |   |   |   |   |   |   |   |   |   |   |   |   |   |   |   |   |   |   |   |   |   |   |   |   |   |   |   |   |   |   |   |   |   |   |   |   |   |   |   |   |   |   |   |   |   |   |   |   |   |   |   |   |   |   |   |   |   |   |   |   |   |   |   |   |   |   |   |   |   |   |   |   |   |   |   |   |   |   |   |   |   |   |   |   |   |   |   |   |   |   |   |   |   |   |   |   |   |   |   |   |   |   |   |   |   |   |   |   |   |   |   |   |   |   |   |   |   |   |   |   |   |   |   |   |   |   |   |   |   |   |   |   |   |   |   |   |   |   |   |   |   |   |   |   |   |   |   |   |   |   |   |   |   |   |   |   |   |   |   |   |   |   |   |   |   |   |   |   |   |   |   |   |   |   |   |   |   |   |   |   |   |   |   |   |   |   |   |   |   |   |   |   |   |   |   |   |   |   |   |   |   |   |   |   |   |   |   |   |   |   |   |   |   |   |   |   |   |   |   |   |   |   |   |   |   |   |   |   |   |   |   |   |   |   |   |   |   |   |   |   |   |   |   |   |   |   |   |   |   |   |   |   |   |   |   |   |   |   |   |   |   |   |   |   |   |   |   |   |   |   |   |   |   |   |   |   |   |   |   |   |   |   |   |   |   |   |   |   |   |   |   |   |   |   |   |   |   |   |   |   |   |   |   |   |   |   |   |   |   |   |   |   |   |   |   |   |   |   |   |   |   |   |   |   |   |   |   |   |   |   |   |   |   |   |   |   |   |   |   |   |   |   |   |   |   |   |   |   |   |   |   |   |   |   |   |   |   |   |   |   |   |   |   |   |   |   |   |   |   |   |   |   |   |   |   |   |   |   |   |   |   |   |   |   |   |   |   |   |   |   |   |   |   |   |   |   |   |   |   |   |   |   |   |   |   |   |   |   |   |   |   |   |   |   |   |   |   |   |   |   |   |   |   |   |   |   |   |   |   |   |   |   |   |   |   |   |   |   |   |   |   |   |   |   |   |   |   |   |   |   |   |   |   |   |   |   |   |   |   |   |   |   |   |   |   |   |   |   |   |   |   |   |   |   |   |   |   |   |   |   |   |   |   |   |   |   |   |   |   |   |   |   |   |   |   |   |   |   |   |   |   |   |   |   |   |   |   |   |   |   |   |   |   |   |   |   |   |   |   |   |   |   |   |   |   |   |   |   |   |   |   |
|                        | (8246) | 8246   | 8260 | 8270  | 8280  | 8290   | 8300  | 8310    | 8320  | 8330 | 8342 |            |         |    |     |      |      |    |        |    |       |        |      |    |      |      |       |    |       |    |   |     |   |    |   |   |   |   |   |   |   |   |   |   |   |   |   |   |   |   |   |   |   |   |   |   |   |   |   |   |   |   |   |   |   |   |   |   |   |   |   |   |   |   |   |   |   |   |   |   |   |   |   |   |   |   |   |   |   |   |   |   |   |   |   |   |   |   |   |   |   |   |   |   |   |   |   |   |   |   |   |   |   |   |   |   |   |   |   |   |   |   |   |   |   |   |   |   |   |   |   |   |   |   |   |   |   |   |   |   |   |   |   |   |   |   |   |   |   |   |   |   |   |   |   |   |   |   |   |   |   |   |   |   |   |   |   |   |   |   |   |   |   |   |   |   |   |   |   |   |   |   |   |   |   |   |   |   |   |   |   |   |   |   |   |   |   |   |   |   |   |   |   |   |   |   |   |   |   |   |   |   |   |   |   |   |   |   |   |   |   |   |   |   |   |   |   |   |   |   |   |   |   |   |   |   |   |   |   |   |   |   |   |   |   |   |   |   |   |   |   |   |   |   |   |   |   |   |   |   |   |   |   |   |   |   |   |   |   |   |   |   |   |   |   |   |   |   |   |   |   |   |   |   |   |   |   |   |   |   |   |   |   |   |   |   |   |   |   |   |   |   |   |   |   |   |   |   |   |   |   |   |   |   |   |   |   |   |   |   |   |   |   |   |   |   |   |   |   |   |   |   |   |   |   |   |   |   |   |   |   |   |   |   |   |   |   |   |   |   |   |   |   |   |   |   |   |   |   |   |   |   |   |   |   |   |   |   |   |   |   |   |   |   |   |   |   |   |   |   |   |   |   |   |   |   |   |   |   |   |   |   |   |   |   |   |   |   |   |   |   |   |   |   |   |   |   |   |   |   |   |   |   |   |   |   |   |   |   |   |   |   |   |   |   |   |   |   |   |   |   |   |   |   |   |   |   |   |   |   |   |   |   |   |   |   |   |   |   |   |   |   |   |   |   |   |   |   |   |   |   |   |   |   |   |   |   |   |   |   |   |   |   |   |   |   |   |   |   |   |   |   |   |   |   |   |   |   |   |   |   |   |   |   |   |   |   |   |   |   |   |   |   |   |   |   |   |   |   |   |   |   |   |   |   |   |   |   |   |   |   |   |   |   |   |   |   |   |   |   |   |   |   |   |   |   |   |   |   |   |   |   |   |   |   |   |   |   |   |   |   |   |   |   |   |   |   |   |   |   |   |   |   |   |   |   |   |   |   |   |   |   |   |   |   |   |   |   |   |   |   |   |   |   |   |   |   |   |   |   |   |   |   |   |   |   |   |   |   |   |   |   |   |   |   |   |   |   |   |   |   |   |   |   |   |   |   |   |   |   |   |   |   |   |   |   |   |   |   |   |   |   |   |   |   |   |   |   |   |   |   |   |   |   |   |   |   |   |   |   |   |   |   |   |   |   |   |   |   |   |   |   |   |   |   |   |   |   |   |   |   |   |   |   |   |   |   |   |   |   |   |   |   |   |   |   |   |   |   |   |   |   |   |   |   |   |   |   |   |   |   |   |   |   |   |   |   |   |   |   |   |   |   |   |   |   |   |   |   |   |   |   |   |   |   |   |   |   |   |   |   |   |   |   |   |   |   |   |   |   |   |   |   |   |   |   |   |   |   |   |   |   |   |   |   |   |   |   |   |   |   |   |   |   |   |   |   |   |   |   |   |   |   |   |   |   |   |   |   |   |   |   |   |   |   |   |   |   |   |   |   |   |   |   |   |   |   |   |   |   |   |   |   |   |   |   |   |   |   |   |   |   |   |   |   |   |   |   |   |   |   |   |   |   |   |   |   |   |   |   |   |   |   |   |   |   |   |   |   |   |   |   |   |   |   |   |   |   |   |   |   |   |   |   |   |   |   |   |   |   |   |   |   |   |   |   |   |   |   |   |   |   |   |   |   |   |   |   |   |   |   |   |   |   |   |   |   |   |   |   |   |   |   |   |   |   |   |   |   |   |   |   |   |   |   |   |   |   |   |   |   |   |   |   |   |   |   |   |   |   |   |   |   |   |   |   |   |   |   |   |   |   |   |   |   |   |   |   |   |   |   |   |   |   |   |   |   |   |   |   |   |   |   |   |   |   |   |   |   |   |   |   |   |   |   |   |   |   |   |   |   |   |   |   |   |   |   |   |   |   |   |   |   |   |   |   |   |   |   |   |   |   |   |   |   |   |   |   |   |   |   |   |   |   |   |   |   |   |   |   |   |   |   |   |   |   |   |   |   |   |   |   |   |   |   |   |   |   |   |   |   |   |   |   |   |   |   |   |   |   |   |   |   |   |   |   |   |   |   |   |   |   |   |   |   |   |   |   |   |   |   |   |   |   |   |   |   |   |   |   |   |   |   |   |   |   |   |   |   |   |   |   |   |   |   |   |   |   |   |   |   |   |   |   |   |   |   |   |   |   |   |   |   |   |   |   |   |   |   |   |   |   |   |   |   |   |   |   |   |   |   |   |   |   |   |   |   |   |   |   |   |   |   |   |   |   |   |   |   |   |   |   |   |   |   |   |   |   |   |   |   |   |   |   |   |   |   |   |   |   |   |   |   |   |   |   |   |   |   |   |
| lamhda NC_001416.1     | (8063) | T      | A    | A     | C     | G      | C     | G       | T     | T    | G    | C          | T       | T  | C   | A    | T    | C  | G      | C  | G     | A      | T    | A  | T    | C    | G     | C  | G     | A  | T | A   | A | G  | G | G | C | A | G | C | T | G |   |   |   |   |   |   |   |   |   |   |   |   |   |   |   |   |   |   |   |   |   |   |   |   |   |   |   |   |   |   |   |   |   |   |   |   |   |   |   |   |   |   |   |   |   |   |   |   |   |   |   |   |   |   |   |   |   |   |   |   |   |   |   |   |   |   |   |   |   |   |   |   |   |   |   |   |   |   |   |   |   |   |   |   |   |   |   |   |   |   |   |   |   |   |   |   |   |   |   |   |   |   |   |   |   |   |   |   |   |   |   |   |   |   |   |   |   |   |   |   |   |   |   |   |   |   |   |   |   |   |   |   |   |   |   |   |   |   |   |   |   |   |   |   |   |   |   |   |   |   |   |   |   |   |   |   |   |   |   |   |   |   |   |   |   |   |   |   |   |   |   |   |   |   |   |   |   |   |   |   |   |   |   |   |   |   |   |   |   |   |   |   |   |   |   |   |   |   |   |   |   |   |   |   |   |   |   |   |   |   |   |   |   |   |   |   |   |   |   |   |   |   |   |   |   |   |   |   |   |   |   |   |   |   |   |   |   |   |   |   |   |   |   |   |   |   |   |   |   |   |   |   |   |   |   |   |   |   |   |   |   |   |   |   |   |   |   |   |   |   |   |   |   |   |   |   |   |   |   |   |   |   |   |   |   |   |   |   |   |   |   |   |   |   |   |   |   |   |   |   |   |   |   |   |   |   |   |   |   |   |   |   |   |   |   |   |   |   |   |   |   |   |   |   |   |   |   |   |   |   |   |   |   |   |   |   |   |   |   |   |   |   |   |   |   |   |   |   |   |   |   |   |   |   |   |   |   |   |   |   |   |   |   |   |   |   |   |   |   |   |   |   |   |   |   |   |   |   |   |   |   |   |   |   |   |   |   |   |   |   |   |   |   |   |   |   |   |   |   |   |   |   |   |   |   |   |   |   |   |   |   |   |   |   |   |   |   |   |   |   |   |   |   |   |   |   |   |   |   |   |   |   |   |   |   |   |   |   |   |   |   |   |   |   |   |   |   |   |   |   |   |   |   |   |   |   |   |   |   |   |   |   |   |   |   |   |   |   |   |   |   |   |   |   |   |   |   |   |   |   |   |   |   |   |   |   |   |   |   |   |   |   |   |   |   |   |   |   |   |   |   |   |   |   |   |   |   |   |   |   |   |   |   |   |   |   |   |   |   |   |   |   |   |   |   |   |   |   |   |   |   |   |   |   |   |   |   |   |   |   |   |   |   |   |   |   |   |   |   |   |   |   |   |   |   |   |   |   |   |   |   |   |   |   |   |   |   |   |   |   |   |   |   |   |   |   |   |   |   |   |   |   |   |   |   |   |   |   |   |   |   |   |   |   |   |   |   |   |   |   |   |   |   |   |   |   |   |   |   |   |   |   |   |   |   |   |   |   |   |   |   |   |   |   |   |   |   |   |   |   |   |   |   |   |   |   |   |   |   |   |   |   |   |   |   |   |   |   |   |   |   |   |   |   |   |   |   |   |   |   |   |   |   |   |   |   |   |   |   |   |   |   |   |   |   |   |   |   |   |   |   |   |   |   |   |   |   |   |   |   |   |   |   |   |   |   |   |   |   |   |   |   |   |   |   |   |   |   |   |   |   |   |   |   |   |   |   |   |   |   |   |   |   |   |   |   |   |   |   |   |   |   |   |   |   |   |   |   |   |   |   |   |   |   |   |   |   |   |   |   |   |   |   |   |   |   |   |   |   |   |   |   |   |   |   |   |   |   |   |   |   |   |   |   |   |   |   |   |   |   |   |   |   |   |   |   |   |   |   |   |   |   |   |   |   |   |   |   |   |   |   |   |   |   |   |   |   |   |   |   |   |   |   |   |   |   |   |   |   |   |   |   |   |   |   |   |   |   |   |   |   |   |   |   |   |   |   |   |   |   |   |   |   |   |   |   |   |   |   |   |   |   |   |   |   |   |   |   |   |   |   |   |   |   |   |   |   |   |   |   |   |   |   |   |   |   |   |   |   |   |   |   |   |   |   |   |   |   |   |   |   |   |   |   |   |   |   |   |   |   |   |   |   |   |   |   |   |   |   |   |   |   |   |   |   |   |   |   |   |   |   |   |   |   |   |   |   |   |   |   |   |   |   |   |   |   |   |   |   |   |   |   |   |   |   |   |   |   |   |   |   |   |   |   |   |   |   |   |   |   |   |   |   |   |   |   |   |   |   |   |   |   |   |   |   |   |   |   |   |   |   |   |   |   |   |   |   |   |   |   |   |   |   |   |   |   |   |   |   |   |   |   |   |   |   |   |   |   |   |   |   |   |   |   |   |   |   |   |   |   |   |   |   |   |   |   |   |   |   |   |   |   |   |   |   |   |   |   |   |   |   |   |   |   |   |   |   |   |   |   |   |   |   |   |   |   |   |   |   |   |   |   |   |   |   |   |   |   |   |   |   |   |   |   |   |   |   |   |   |   |   |   |   |   |   |   |   |   |   |   |   |   |   |   |   |   |   |   |   |   |   |   |   |   |   |   |   |   |   |   |   |   |   |   |   |   |   |   |   |   |   |   |   |   |   |   |   |   |
| SARS-CoV-2 NC_045512.2 | (3312) | T      | T    | A     | C     | A      | C     | A       | G     | T    | T    | G          | T       | T  | C   | A    | G    | A  | C      | T  | A     | T      | T    | G  | A    | A    | A     | C  | T     | T  | A | C   | T | A  | A | A | A | A | T | G | A | A | A | T | G | A | A | A | T | G | A | A | A | T | G | A | A | A | T | G | A | A | A | T | G | A | A | A | T | G | A | A | A | T | G | A | A | A | T | G | A | A | A | T | G | A | A | A | T | G | A | A | A | T | G | A | A | A | T | G | A | A | A | T | G | A | A | A | T | G | A | A | A | T | G | A | A | A | T | G | A | A | A | T | G | A | A | A | T | G | A | A | A | T | G | A | A | A | T | G | A | A | A | T | G | A | A | A | T | G | A | A | A | T | G | A | A | A | T | G | A | A | A | T | G | A | A | A | T | G | A | A | A | T | G | A | A | A | T | G | A | A | A | T | G | A | A | A | T | G | A | A | A | T | G | A | A | A | T | G | A | A | A | T | G | A | A | A | T | G | A | A | A | T | G | A | A | A | T | G | A | A | A | T | G | A | A | A | T | G | A | A | A | T | G | A | A | A | T | G | A | A | A | T | G | A | A | A | T | G | A | A | A | T | G | A | A | A | T | G | A | A | A | T | G | A | A | A | T | G | A | A | A | T | G | A | A | A | T | G | A | A | A | T | G | A | A | A | T | G | A | A | A | T | G | A | A | A | T | G | A | A | A | T | G | A | A | A | T | G | A | A | A | T | G | A | A | A | T | G | A | A | A | T | G | A | A | A | T | G | A | A | A | T | G | A | A | A | T | G | A | A | A | T | G | A | A | A | T | G | A | A | A | T | G | A | A | A | T | G | A | A | A | T | G | A | A | A | T | G | A | A | A | T | G | A | A | A | T | G | A | A | A | T | G | A | A | A | T | G | A | A | A | T | G | A | A | A | T | G | A | A | A | T | G | A | A | A | T | G | A | A | A | T | G | A | A | A | T | G | A | A | A | T | G | A | A | A | T | G | A | A | A | T | G | A | A | A | T | G | A | A | A | T | G | A | A | A | T | G | A | A | A | T | G | A | A | A | T | G | A | A | A | T | G | A | A | A | T | G | A | A | A | T | G | A | A | A | T | G | A | A | A | T | G | A | A | A | T | G | A | A | A | T | G | A | A | A | T | G | A | A | A | T | G | A | A | A | T | G | A | A | A | T | G | A | A | A | T | G | A | A | A | T | G | A | A | A | T | G | A | A | A | T | G | A | A | A | T | G | A | A | A | T | G | A | A | A | T | G | A | A | A | T | G | A | A | A | T | G | A | A | A | T | G | A | A | A | T | G | A | A | A | T | G | A | A | A | T | G | A | A | A | T | G | A | A | A | T | G | A | A | A | T | G | A | A | A | T | G | A | A | A | T | G | A | A | A | T | G | A | A | A | T | G | A | A | A | T | G | A | A | A | T | G | A | A | A | T | G | A | A | A | T | G | A | A | A | T | G | A | A | A | T | G | A | A | A | T | G | A | A | A | T | G | A | A | A | T | G | A | A | A | T | G | A | A | A | T | G | A | A | A | T | G | A | A | A | T | G | A | A | A | T | G | A | A | A | T | G | A | A | A | T | G | A | A | A | T | G | A | A | A | T | G | A | A | A | T | G | A | A | A | T | G | A | A | A | T | G | A | A | A | T | G | A | A | A | T | G | A | A | A | T | G | A | A | A | T | G | A | A | A | T | G | A | A | A | T | G | A | A | A | T | G | A | A | A | T | G | A | A | A | T | G | A | A | A | T | G | A | A | A | T | G | A | A | A | T | G | A | A | A | T | G | A | A | A | T | G | A | A | A | T | G | A | A | A | T | G | A | A | A | T | G | A | A | A | T | G | A | A | A | T | G | A | A | A | T | G | A | A | A | T | G | A | A | A | T | G | A | A | A | T | G | A | A | A | T | G | A | A | A | T | G | A | A | A | T | G | A | A | A | T | G | A | A | A | T | G | A | A | A | T | G | A | A | A | T | G | A | A | A | T | G | A | A | A | T | G | A | A | A | T | G | A | A | A | T | G | A | A | A | T | G | A | A | A | T | G | A | A | A | T | G | A | A | A | T | G | A | A | A | T | G | A | A | A | T | G | A | A | A | T | G | A | A | A | T | G | A | A | A | T | G | A | A | A | T | G | A | A | A | T | G | A | A | A | T | G | A | A | A | T | G | A | A | A | T | G | A | A | A | T | G | A | A | A | T | G | A | A | A | T | G | A | A | A | T | G | A | A | A | T | G | A | A | A | T | G | A | A | A | T | G | A | A | A | T | G | A | A | A | T | G | A | A | A | T | G | A | A | A | T | G | A | A | A | T | G | A | A | A | T | G | A | A | A | T | G | A | A | A | T | G | A | A | A | T | G | A | A | A | T | G | A | A | A | T | G | A | A | A | T | G | A | A | A | T | G | A | A | A | T | G | A | A | A | T | G | A | A | A | T | G | A | A | A | T | G | A | A | A | T | G | A | A | A | T | G | A | A | A | T | G | A | A | A | T | G | A | A | A | T | G | A | A | A | T | G | A | A | A | T | G | A | A | A | T | G | A | A | A | T | G | A | A | A | T | G | A | A | A | T | G | A | A | A | T | G | A | A | A | T | G | A | A | A | T | G | A | A | A | T | G | A | A | A | T | G | A | A | A | T | G | A | A | A | T | G |

## SARS-CoV-2 &amp; lambda.apr

|                        |        |        |                 |         |             |         |          |               |            |         |                  |                |                |                |                    |             |                |              |             |          |        |           |
|------------------------|--------|--------|-----------------|---------|-------------|---------|----------|---------------|------------|---------|------------------|----------------|----------------|----------------|--------------------|-------------|----------------|--------------|-------------|----------|--------|-----------|
|                        |        |        |                 |         |             |         |          |               |            |         |                  |                | Section 92     |                |                    |             |                |              |             |          |        |           |
|                        | (8828) | 8828   | 8840            | 8850    | 8860        | 8870    | 8880     | 8890          | 8900       | 8910    | 8924             |                |                |                |                    |             |                |              |             |          |        |           |
| lambda NC_001416.1     | (8641) | TTTTG  | ATG             | AGCG    | GATTTTCCGGC | AGTTGCC | GT       | TTATCTCA      | CCG        | CGCTGAA | TACA             | CGGGCGAAGAGCTG | GACAGCG        | ATAC           | CTGGCAGGCGGAGCT    |             |                |              |             |          |        |           |
| SARS-CoV-2 NC_045512.2 | (3850) | TGAAA  | AGC             | AGTT    | GAACA       | --AAAG  | ATCGCTGA | GATT          | CCTAA      | ---     | GAGGAAGT         | TAGC           | --CATTTATAACT  | GAAAGTA        | AACCTTCAGTTGAACAGA |             |                |              |             |          |        |           |
|                        |        |        |                 |         |             |         |          |               |            |         |                  |                | Section 93     |                |                    |             |                |              |             |          |        |           |
|                        | (8925) | 8925   | 8930            | 8940    | 8950        | 8960    | 8970     | 8980          | 8990       | 9000    | 9010             | 9021           |                |                |                    |             |                |              |             |          |        |           |
| lamhda NC_001416.1     | (8737) | G      | CAT             | ATCGA   | AGT         | T       | --TTCC   | TGCTGCTCA     | GGTGCCG    | GATT    | CAGAGCT          | G              | GATGCGTGG      | ATGG           | AGTC               | CCGG        | --ATTTAT       | TCCGGT       | GATG        | AGC      | GATATC |           |
| SARS-CoV-2 NC_045512.2 | (3939) | G      | AAA             | CAAG    | ATGA        | T       | AAGAAAA  | TCAAAGCTT     | GTGTTGAAGA | -----   | AGTT             | --ACA          | --AC           | --AACT         | CTGG               | AAGAAAC     | T              | AAGT         | TCC         | TACA     | GAAAC  |           |
|                        |        |        |                 |         |             |         |          |               |            |         |                  |                | Section 94     |                |                    |             |                |              |             |          |        |           |
|                        | (9022) | 9022   | 9030            | 9040    | 9050        | 9060    | 9070     | 9080          | 9090       | 9100    | 9118             |                |                |                |                    |             |                |              |             |          |        |           |
| lambda NC_001416.1     | (8828) | CC     | GGC             | ACT     | GT          | C       | AGATT    | TGAT          | CACCA      | GTAT    | GGTGGCCAGCGGCTAT | G              | ACT            | ACCGGCGCGAC    | GAT                | GATG        | CGGGCTTGTGGAGT | T            | CAGCCGA     | TCTG     | ACT    |           |
| SARS-CoV-2 NC_045512.2 | (4022) | TT     | GTT             | ACT     | TT          | -       | ATATT    | GACATT        | AATG       | GCAA    | -T-----          | CTTCATCCA      | GATT           | CTGCCACTCTT    | GT                 | TAG         | TGACATTGA      | ----         | CA          | TCACTTTC | TTAAA  | --        |
|                        |        |        |                 |         |             |         |          |               |            |         |                  |                | Section 95     |                |                    |             |                |              |             |          |        |           |
|                        | (9119) | 9119   | 9130            | 9140    | 9150        | 9160    | 9170     | 9180          | 9190       | 9200    | 9215             |                |                |                |                    |             |                |              |             |          |        |           |
| lamhda NC_001416.1     | (8924) | TATGTC | AT              | TAC     | CTAT        | GAA     | ATGT     | -GAG          | GACGC      | TATGC   | CTGT             | ATCCAAAT       | TCCTACAATGCCGG | TGAAAG         | GTGCC              | GGGACC      | ACC            | CTGTGGGT     | TTAT        | AAGGG    |        |           |
| SARS-CoV-2 NC_045512.2 | (4105) | -GAAAG | AT              | GCT     | CCAT        | -AT     | ATAGT    | GG            | TGATG      | TGTT    | CAAG             | AGGGTGT        | TTT-----       | TAACT          | -GCTGT             | GGT         | TAT            | ACCTAC       | ----        | TAAA     | AAGGC  |           |
|                        |        |        |                 |         |             |         |          |               |            |         |                  |                | Section 96     |                |                    |             |                |              |             |          |        |           |
|                        | (9216) | 9216   | 9230            | 9240    | 9250        | 9260    | 9270     | 9280          | 9290       | 9300    | 9312             |                |                |                |                    |             |                |              |             |          |        |           |
| lambda NC_001416.1     | (9020) | G      | AGC             | GGTGACC | CTT         | ACGC    | GAATC    | CGC           | -TTTCAGAC  | GTG     | ACTG             | GTCG           | CGT            | CTGG           | CAAAAGT            | TAAAGAC     | CT             | --GAC        | CGCCCGGC    | GAAC     | TG     | ACCGCTGAG |
| SARS-CoV-2 NC_045512.2 | (4183) | TG     | GTGG            | CACTA   | CTG         | AAAT    | GCTAG    | CGAAAGCTTTGAG | AAAA       | AGTG    | ---              | CAACAG         | CAAA           | TTAT           | TATAA              | CCA         | CTTACC         | CGGGTCAG     | GGTT        | TAAAT    | GTTA   | C         |
|                        |        |        |                 |         |             |         |          |               |            |         |                  |                | Section 97     |                |                    |             |                |              |             |          |        |           |
|                        | (9313) | 9313   | 9320            | 9330    | 9340        | 9350    | 9360     | 9370          | 9380       | 9390    | 9409             |                |                |                |                    |             |                |              |             |          |        |           |
| lambda NC_001416.1     | (9114) | T      | C               | TAT     | GAC         | GACAG   | CTAT     | CTCGAT        | TGAT       | GAA     | GATGCA           | ACTGGACTG      | C              | GACCGGGCAGGGG  | CA                 | GAAATC      | TGC            | CGGAG        | ATACCAGCTTC | ACGCTGG  | CGT    |           |
| SARS-CoV-2 NC_045512.2 | (4277) | A      | CTGTA           | GAG     | GAGG        | -CAA    | AAGACAG  | TGCT          | T          | AAAA    | -AGT             | G              | TAAAAGTGC      | CTTTTACATTCTAC | CA                 | -TCTAT      | TATCTCT        | -AATGAGAAGCA | AGAAATT     | CT       |        |           |
|                        |        |        |                 |         |             |         |          |               |            |         |                  |                | Section 98     |                |                    |             |                |              |             |          |        |           |
|                        | (9410) | 9410   | 9420            | 9430    | 9440        | 9450    | 9460     | 9470          | 9480       | 9490    | 9506             |                |                |                |                    |             |                |              |             |          |        |           |
| lamhda NC_001416.1     | (9211) | GGA    | TGCCCCGAGAGCAGG | GGCAGCA | GGCGCT      | TGCT    | GCGTGGTT | T             | AATGA      | AGGC    | GATAC            | -CCGTGC        | CTAT           | --AAAAT        | CCGCT              | TCCCGAACGGC | ACGGT          |              |             |          |        |           |
| SARS-CoV-2 NC_045512.2 | (4370) | GGA    | ACT             | -----   | GTTTCTT     | GG      | AAT      | TGCG          | GAGAAATGCT | TGCAC   | ATGC             | AGAA           | GAAACACG       | CA             | AATTAA             | TGCTGTC     | TGTGTGGAA      | -ACTAAA      |             |          |        |           |

## SARS-CoV-2 &amp; lambda.apr

|                        |         |                          |          |               |                     |          |         |         |                 |                     |            |              |              |                        |                     |               |              |             |           |
|------------------------|---------|--------------------------|----------|---------------|---------------------|----------|---------|---------|-----------------|---------------------|------------|--------------|--------------|------------------------|---------------------|---------------|--------------|-------------|-----------|
| Section 99             |         |                          |          |               |                     |          |         |         |                 |                     |            |              |              |                        |                     |               |              |             |           |
|                        | (9507)  | 9507                     | 9520     | 9530          | 9540                | 9550     | 9560    | 9570    | 9580            | 9590                | 9603       |              |              |                        |                     |               |              |             |           |
| lambda NC_001416.1     | (9305)  | CGATGTGTTCCGTGGC-TGGGTCA | G        | CA            | AGTATCGGTAAGGCGGTGA | A        | CGGCGA  | AGG     | AA              | G--TGATCACCCGCACGGT | TGAAAGT    | CACCAATGTGGG | A            | CGT                    |                     |               |              |             |           |
| SARS-CoV-2 NC_045512.2 | (4454)  | GCCATAGTT-TCAACTATAC-AGC | G        | T             | AAATATAAGGGTATTAA   | A        | TACAAG  | AGG     | GT              | GTTG-----TTGAT      | T          | ----AT       | TGGTGCT----- | A                      | GAT                 |               |              |             |           |
| Section 100            |         |                          |          |               |                     |          |         |         |                 |                     |            |              |              |                        |                     |               |              |             |           |
|                        | (9604)  | 9604                     | 9610     | 9620          | 9630                | 9640     | 9650    | 9660    | 9670            | 9680                | 9690       | 9700         |              |                        |                     |               |              |             |           |
| lamhda NC_001416.1     | (9399)  | CCGT                     | CGATGG   | CAGAAG        | ATCGCAG             | CACGGTA  | ACA     | CGGC    | CAACCGGCATG     | AC                  | CGTGACGC   | CTGC-CAGC    | AC           | CTCGGTGGTGAAAGGGCAGAGC | AC                  | CACG          |              |             |           |
| SARS-CoV-2 NC_045512.2 | (4530)  | TTTAC                    | TTT      | TACACCAG--TAA | AA                  | CA       | ACTGT   | A       | GC              | TCACTTATCAACAC      | AC         | TTAACGAT     | CT           | AAATGAA                | ACT-----C-----TTGTT | AC            | AATG         |             |           |
| Section 101            |         |                          |          |               |                     |          |         |         |                 |                     |            |              |              |                        |                     |               |              |             |           |
|                        | (9701)  | 9701                     | 9710     | 9720          | 9730                | 9740     | 9750    | 9760    | 9770            | 9780                | 9797       |              |              |                        |                     |               |              |             |           |
| lambda NC_001416.1     | (9495)  | CTGACCGT                 | GGCCTTCC | AGC           | CGGAGGGCGT          | AACCGACA | AAGAGCT | TTCTGTG | GGTGTCTG        | CGGATAAAAC          | AAAAGCCAC  | CGTGTCGG     | TCAGTGGTATGA |                        |                     |               |              |             |           |
| SARS-CoV-2 NC_045512.2 | (4610)  | C                        | CACTT-G  | GCTATGTACA    | CATG                | GCTTAA   | ATTTGAA | AGAAGCT | GCTC---GGTATATG | AGATCTCTCA          | AAAGTGCCAG | CTACAGTT     | TCGTTTCTTCA  |                        |                     |               |              |             |           |
| Section 102            |         |                          |          |               |                     |          |         |         |                 |                     |            |              |              |                        |                     |               |              |             |           |
|                        | (9798)  | 9798                     | 9810     | 9820          | 9830                | 9840     | 9850    | 9860    | 9870            | 9880                | 9894       |              |              |                        |                     |               |              |             |           |
| lamhda NC_001416.1     | (9597)  | CCATCAC                  | CGTGA    | ACGGCGTTGCT   | GCA                 | GGCAAGGT | CAACATT | CCGGT   | TGTA            | TC                  | CGGTAA     | TGGTGAGT     | TTTGCTG      | CGGTT-GCA              | GAAA                | TTAC          | CGTCACCG     |             |           |
| SARS-CoV-2 NC_045512.2 | (4703)  | CC                       | TGATG    | CTGTT         | AC---AGC--GTATA-    | ATGGT    | TATCTT  | AC      | TTCT-TCT        | TC---               | TAA        | AA-CACC      | TGAAGAA      | CATTTTATT              | GAAA                | CCATCTCAC---  |              |             |           |
| Section 103            |         |                          |          |               |                     |          |         |         |                 |                     |            |              |              |                        |                     |               |              |             |           |
|                        | (9895)  | 9895                     | 9900     | 9910          | 9920                | 9930     | 9940    | 9950    | 9960            | 9970                | 9980       | 9991         |              |                        |                     |               |              |             |           |
| lambda NC_001416.1     | (9688)  | CCAG                     | TTAA     | TCCGGAGAGT    | CA                  | GCGATG   | TCCT    | GAAAACC | GAATCAT         | TTG--               | AACAT--    | AAC          | GGTGACCG     | TCACG                  | CTTTCTGA            | ACTGT-CAGCCCT |              |             |           |
| SARS-CoV-2 NC_045512.2 | (4785)  | ----                     | TTGC     | TGGTTCCTA     | TAA                 | AGAT     | TGGTCCT | -ATTCTG | GACAACT         | TACAC               | AAC        | TAGGT        | ATAGA        | ---ATTTC               | TTAAGAGAGG          | TGATA         | AAAAGTGTATAT |             |           |
| Section 104            |         |                          |          |               |                     |          |         |         |                 |                     |            |              |              |                        |                     |               |              |             |           |
|                        | (9992)  | 9992                     | 10000    | 10010         | 10020               | 10030    | 10040   | 10050   | 10060           | 10070               | 10088      |              |              |                        |                     |               |              |             |           |
| lambda NC_001416.1     | (9779)  | GCAG                     | CGCAT    | TGAGCAT       | CTCG                | CCGTGATG | AAACG   | CA      | GGCAG           | AACAGG              | CGGAG      | T            | CAGAC        | AGCA                   | ACC                 | GGAAGTT       | TACTGTGGA    | AGACGCCATCA | GAACC     |
| SARS-CoV-2 NC_045512.2 | (4874)  | TACA                     | CTAG---  | TAATC         | CTAC                | CA       | CATTCC  | ACCTAG  | ATGG            | TGAAGTTAT           | CACCT      | TTGACA       | ATCT         | TAA                    | GAC                 | ACTTCTT       | CTTTGAGA     | GAAGTGAG    | GACTA     |
| Section 105            |         |                          |          |               |                     |          |         |         |                 |                     |            |              |              |                        |                     |               |              |             |           |
|                        | (10089) | 10089                    | 10100    | 10110         | 10120               | 10130    | 10140   | 10150   | 10160           | 10170               | 10185      |              |              |                        |                     |               |              |             |           |
| lamhda NC_001416.1     | (9876)  | GGCGC                    | GTTTC    | TGGTGGCG      | ATGTCC              | CTGTGGC  | ATA     | ACCAT   | CCG             | CA                  | GAAGACGC   | AGATG        | CCGT         | C                      | CATGA               | ATGAAGCCGT    | TAAACAG      | GATTG       | AGCAGGAAG |
| SARS-CoV-2 NC_045512.2 | (4968)  | TTA-A                    | GGTGT    | TTA-CAAC      | AGTAGA              | CA-----  | ACATTA  | ACCTC   | CA              | --ACGCA             | AGTGTG     | GACATGTC     | AATG---      | ACATA                  | TAT---              | GGACA         | A-           | CAGTTTG     |           |

## SARS-CoV-2 &amp; lambda.apr

|                        |         |                                                                                                    |       |       |       |       |       |       |       |       |       |       |
|------------------------|---------|----------------------------------------------------------------------------------------------------|-------|-------|-------|-------|-------|-------|-------|-------|-------|-------|
| Section 106            |         |                                                                                                    |       |       |       |       |       |       |       |       |       |       |
|                        | (10186) | 10186                                                                                              | 10200 | 10210 | 10220 | 10230 | 10240 | 10250 | 10260 | 10270 | 10282 |       |
| lambda NC_001416.1     | (9973)  | TGCTTACACCTGGCCCACGGAGGCAATTTCTCATGCTGAAAACGTGGTGTACCGGCTGTCTGGTATGTATGAGTTTGTGGTGAATAATGCCCTGA    |       |       |       |       |       |       |       |       |       |       |
| SARS-CoV-2 NC_045512.2 | (5049)  | GTCCAACCTTATTTGGGA--TGGAGCTGATGTTACTAAAAATAAAACCTCA-----T-----AATTCACA-TGAAG-GTAAACAATTTATGTTT     |       |       |       |       |       |       |       |       |       |       |
| Section 107            |         |                                                                                                    |       |       |       |       |       |       |       |       |       |       |
|                        | (10283) | 10283                                                                                              | 10290 | 10300 | 10310 | 10320 | 10330 | 10340 | 10350 | 10360 | 10379 |       |
| lambda NC_001416.1     | (10070) | ACAGACAGAGGACGCCGGGCCTGCAGAGCCTGTTTCTGGGGAAAGTGTTTCGACGGTGAAGCTGAGTTTGGCCCTGAAACTGGCGCGT           |       |       |       |       |       |       |       |       |       |       |
| SARS-CoV-2 NC_045512.2 | (5127)  | TACCTAAT---GATGACACTCTACGT-----GTTGAGGCTTTT-GAGTACTACACACAACCTGATCCTAGTTTTCT--TGG-----GTAGGTACAT   |       |       |       |       |       |       |       |       |       |       |
| Section 108            |         |                                                                                                    |       |       |       |       |       |       |       |       |       |       |
|                        | (10380) | 10380                                                                                              | 10390 | 10400 | 10410 | 10420 | 10430 | 10440 | 10450 | 10460 | 10476 |       |
| lambda NC_001416.1     | (10167) | GACCCGACTGGCGTGCCATGCTTGCCGGGATGTGATGCACGGAGTATGCCGACTGGCACCCTTTTACAGTACCATTATTTCATGATGTT-TCTGC    |       |       |       |       |       |       |       |       |       |       |
| SARS-CoV-2 NC_045512.2 | (5206)  | GTCAAGCATTAATCACTATAAAAGTGGAAATAG-CGACAAGTTAATGGTTTAACTT-----CTATTAAATGGGCAGA--TAACAACGTGTATCTT    |       |       |       |       |       |       |       |       |       |       |
| Section 109            |         |                                                                                                    |       |       |       |       |       |       |       |       |       |       |
|                        | (10477) | 10477                                                                                              | 10490 | 10500 | 10510 | 10520 | 10530 | 10540 | 10550 | 10560 | 10573 |       |
| lambda NC_001416.1     | (10263) | TGGATATGCACTTTTCCGGGCTGACGT-ACACCGTGCTCAGCCTGTTTTTCAGCGATCCGGATATGCATCCGCTGGATTTCAGTCTGCTGAACCGGC  |       |       |       |       |       |       |       |       |       |       |
| SARS-CoV-2 NC_045512.2 | (5294)  | GCCACTGCATTGTT-----AACACTCCAACAAATAGAGTTGAAGT-----TTAATCACCCTGC-----TCTACAAGA-TG-----C             |       |       |       |       |       |       |       |       |       |       |
| Section 110            |         |                                                                                                    |       |       |       |       |       |       |       |       |       |       |
|                        | (10574) | 10574                                                                                              | 10580 | 10590 | 10600 | 10610 | 10620 | 10630 | 10640 | 10650 | 10660 | 10670 |
| lambda NC_001416.1     | (10359) | GCGAGGCTGACGAAGAAGCTGAAGATGATGTGCTGATGCAGAAAGCGGCAGGGCTTGCCGAGGTGTCCGCTTTGGCCCGGACGGGAATGAAGTTAT   |       |       |       |       |       |       |       |       |       |       |
| SARS-CoV-2 NC_045512.2 | (5359)  | TTATTACAGAGCAAGGCTGTGTAAGCTGC--TAACTTTTGTGCACTTAT-CTTAGCCTA-CTGTAAATAAGACA GTAGGTGA-GTTAGGTGAT-GTT |       |       |       |       |       |       |       |       |       |       |
| Section 111            |         |                                                                                                    |       |       |       |       |       |       |       |       |       |       |
|                        | (10671) | 10671                                                                                              | 10680 | 10690 | 10700 | 10710 | 10720 | 10730 | 10740 | 10750 | 10767 |       |
| lambda NC_001416.1     | (10456) | CCCCGCTTCCCCG GATGTGGCGGACATGACCGAGGATGACGTAATGCTGATGACAGTATCAGAAGGGATCGCAGGAGGAGTCCGGTATGGCTGAACC |       |       |       |       |       |       |       |       |       |       |
| SARS-CoV-2 NC_045512.2 | (5450)  | AGAGAAACAATGAGTACTTGT---TCAACATGCCAATTTAGATCTTGCA-----AAGAGTC---TTGAACGTGGTGTGTAAAACTTGTGGA        |       |       |       |       |       |       |       |       |       |       |
| Section 112            |         |                                                                                                    |       |       |       |       |       |       |       |       |       |       |
|                        | (10768) | 10768                                                                                              | 10780 | 10790 | 10800 | 10810 | 10820 | 10830 | 10840 | 10850 | 10864 |       |
| lambda NC_001416.1     | (10553) | GGTAGGCGATCTGGTCGTTG-ATTTGAGTCTGATGCGGCCAGATTGTACGAGC-AGATGGCCAGAGTCAGGCGTCATTTTTCTGGTACGGAAGAGTG  |       |       |       |       |       |       |       |       |       |       |
| SARS-CoV-2 NC_045512.2 | (5534)  | CAACA GCGA----CAACCCTTAAGGTGTAGAAAGCTGTT---A-TGTACATGGGCACACTTCTTATGAACAAATTTAAGAAA-GGTGTTCAATAC   |       |       |       |       |       |       |       |       |       |       |



## SARS-CoV-2 &amp; lambda.apr

|                        |         |            |           |         |           |           |         |               |            |       |          |             |        |         |         |          |                 |       |         |       |         |       |           |         |             |         |                  |       |        |        |             |   |          |   |       |
|------------------------|---------|------------|-----------|---------|-----------|-----------|---------|---------------|------------|-------|----------|-------------|--------|---------|---------|----------|-----------------|-------|---------|-------|---------|-------|-----------|---------|-------------|---------|------------------|-------|--------|--------|-------------|---|----------|---|-------|
|                        |         |            |           |         |           |           |         |               |            |       |          | Section 113 |        |         |         |          |                 |       |         |       |         |       |           |         |             |         |                  |       |        |        |             |   |          |   |       |
|                        | (10865) | 10865      | 10870     | 10880   | 10890     | 10900     | 10910   | 10920         | 10930      | 10940 | 10950    | 10961       |        |         |         |          |                 |       |         |       |         |       |           |         |             |         |                  |       |        |        |             |   |          |   |       |
| lambda NC_001416.1     | (10648) | ATGC       | GAAAAAACA | GCGGC   | AGTC      | GT        | TGAAC   | AGT           | TCG        | CT    | GAGC     | CGACAGG     | CG     | CTGG    | CT      | G---     | CACA            | GAAAG | CGGGG   | ATTT  | CC      | GT    | CGGG      | CAGTAT  | AA          | GC      |                  |       |        |        |             |   |          |   |       |
| SARS-CoV-2 NC_045512.2 | (5622)  | C-TT       | GTA       | CGTG--T | GGTAA     | ACAA      | GCT     | TAC           | AAA        | A     | TAT      | CT          | AGTA   | CAACAGG | AG      | TCAC     | CT              | TTT   | GTTAT   | GAT   | TGT     | CAG   | CACCAC    | CT      | G---        | T       | CAGTAT           | GAA   | CT     |        |             |   |          |   |       |
|                        |         |            |           |         |           |           |         |               |            |       |          | Section 114 |        |         |         |          |                 |       |         |       |         |       |           |         |             |         |                  |       |        |        |             |   |          |   |       |
|                        | (10962) | 10962      | 10970     | 10980   | 10990     | 11000     | 11010   | 11020         | 11030      | 11040 | 11058    |             |        |         |         |          |                 |       |         |       |         |       |           |         |             |         |                  |       |        |        |             |   |          |   |       |
| lambda NC_001416.1     | (10742) | CGCCATGCGT | ATGCT     | TGCT    | TGC       | AC        | AGTT    | CACCGACGTG    | GG         | CA-C  | G        | CAGCT-T     | G      | CAGGC   | GGGC    | A        | AAGT            | CCGTG | G       | CT    | TG      | ATCCT | GCTG      | CA      | ACAGGGGGGGC |         |                  |       |        |        |             |   |          |   |       |
| SARS-CoV-2 NC_045512.2 | (5713)  | TAAG-----  | C         | ATGG    | TAC       | AT        | TTT     | AC            | -----      | TTGT  | GG       | CA          | AGT    | G       | AGTAC   | ACTGGT-- | AATT            | A     | CCAG--  | TGT   | GGT     | CA    | CT-ATAAA  | CA      | TATAACTTCTA |         |                  |       |        |        |             |   |          |   |       |
|                        |         |            |           |         |           |           |         |               |            |       |          | Section 115 |        |         |         |          |                 |       |         |       |         |       |           |         |             |         |                  |       |        |        |             |   |          |   |       |
|                        | (11059) | 11059      | 11070     | 11080   | 11090     | 11100     | 11110   | 11120         | 11130      | 11140 | 11155    |             |        |         |         |          |                 |       |         |       |         |       |           |         |             |         |                  |       |        |        |             |   |          |   |       |
| lambda NC_001416.1     | (10837) | AGGTGA     | AAGGAC    | TCC     | TT        | CGGC      | G       | GGATGATCCCCAT | G          | TTC   | CAGGG    | GG          | CTT    | G       | CCGGT   | TG       | CG              | ATCAC | CCT     | G     | CCGATG  | T     | TGG       | G---    | GGCCAC      | -----   | CT               | GC    | T      | G      |             |   |          |   |       |
| SARS-CoV-2 NC_045512.2 | (5790)  | AAGAA      | ACTTTG    | TAT     | TG        | CATA      | G       | ACGGT         | GCTTTAC    | T     | T--      | ACAA        | AGT    | CT      | C       | AGAA     | TAC             | AA    | AGGT    | CCT   | A       | TT--  | AC        | G       | GAT         | G       | TTTTCTACAAAGAAAA | CAG   | T      | T      |             |   |          |   |       |
|                        |         |            |           |         |           |           |         |               |            |       |          | Section 116 |        |         |         |          |                 |       |         |       |         |       |           |         |             |         |                  |       |        |        |             |   |          |   |       |
|                        | (11156) | 11156      | 11170     | 11180   | 11190     | 11200     | 11210   | 11220         | 11230      | 11240 | 11252    |             |        |         |         |          |                 |       |         |       |         |       |           |         |             |         |                  |       |        |        |             |   |          |   |       |
| lambda NC_001416.1     | (10926) | G          | CGGTGGCGA | C       | CGGTGCG   | CT        | G       | GCGTA         | T          | GCC   | T        | GGT         | AT     | CAG     | G       | GCAACTCA | ACCCTGTCCGATTTC | A     | ACAAAAC | G     | CTGGTCC | TTT   | CCGGC     | A       | ATCAGGCGG   |         |                  |       |        |        |             |   |          |   |       |
| SARS-CoV-2 NC_045512.2 | (5883)  | AC         | ACAACAAC  | C       | ATAAAAC   | C         | AGT-TAC | T-TA          | TAA-       | AT    | TG       | G           | -----  | T       | ATGGT   | GTG      | -----           | A     | TGGTGTG | ----- | TTT     | GT--- | A         | -----   |             |         |                  |       |        |        |             |   |          |   |       |
|                        |         |            |           |         |           |           |         |               |            |       |          | Section 117 |        |         |         |          |                 |       |         |       |         |       |           |         |             |         |                  |       |        |        |             |   |          |   |       |
|                        | (11253) | 11253      | 11260     | 11270   | 11280     | 11290     | 11300   | 11310         | 11320      | 11330 | 11349    |             |        |         |         |          |                 |       |         |       |         |       |           |         |             |         |                  |       |        |        |             |   |          |   |       |
| lambda NC_001416.1     | (11023) | G          | ACTG      | ACG-G   | C         | AGATCGTAT | G       | CTGG          | TCCTGTCCAG | A     | GCCGGGC  | A           | GGCGGC | A       | GGGC    | T        | GACGTTT         | A-    | AC      | CAGA  | C       | CAGC  | G         | AGTCAC  | T           | CAGCGCA | C                | TGGTT | T      |        |             |   |          |   |       |
| SARS-CoV-2 NC_045512.2 | (5934)  | C          | AGAA      | ATTGA   | C         | CCTA----  | AGT     | TGG           | A---C-AATT | A     | TTATAAG  | A           | AAGACA | A       | TTCT    | T        | ATTTAC          | AG    | AG      | CAAC  | CAATT   | G     | ATCTTG    | T       | ACCAAAC     | C       | AACCA            | A     |        |        |             |   |          |   |       |
|                        |         |            |           |         |           |           |         |               |            |       |          | Section 118 |        |         |         |          |                 |       |         |       |         |       |           |         |             |         |                  |       |        |        |             |   |          |   |       |
|                        | (11350) | 11350      | 11360     | 11370   | 11380     | 11390     | 11400   | 11410         | 11420      | 11430 | 11446    |             |        |         |         |          |                 |       |         |       |         |       |           |         |             |         |                  |       |        |        |             |   |          |   |       |
| lambda NC_001416.1     | (11118) | A          | AGG       | C       | GGGGTAAGC | G         | GTGA    | G             | GC         | T     | CAG      | TT          | -GC    | GT      | CCA     | T        | CAGCCA          | GA    | GTG     | T     | GG      | C     | GCG       | TTT     | CTCCTCTGCA  | T       | CCGG             | C     | GTGG   | A      | GGTGGACAAGG | T | CGCT     |   |       |
| SARS-CoV-2 NC_045512.2 | (6023)  | T          | ATC       | C--     | AAACGCAAG | C         | TTC     | GA--TA        | AAT        | TT    | TAA      | GT          | TTG    | T--     | ATGT    | G        | ATAA            | TAT   | C       | AAA   | TTT     | G     | CTGATGATT | TAAAC   | C           | AGTT    | A                | AC--- | TGGTTA | T      | AAGA        |   |          |   |       |
|                        |         |            |           |         |           |           |         |               |            |       |          | Section 119 |        |         |         |          |                 |       |         |       |         |       |           |         |             |         |                  |       |        |        |             |   |          |   |       |
|                        | (11447) | 11447      | 11460     | 11470   | 11480     | 11490     | 11500   | 11510         | 11520      | 11530 | 11543    |             |        |         |         |          |                 |       |         |       |         |       |           |         |             |         |                  |       |        |        |             |   |          |   |       |
| lambda NC_001416.1     | (11214) | G          | A         | G       | CCT       | T         | CGGG    | AAG           | CTGA       | C     | CAC      | A           | G      | A       | CCCGACG | T        | CGGG            | CTGAC | GGCG    | ATGG  | CTCGCA  | G     | T         | T       | CCA         | TAAC    | G                | TG    | T      | CGGCGG | AGC         | A | GATTGCGT | A | TGTTG |
| SARS-CoV-2 NC_045512.2 | (6111)  | --         | A         | ACCT    | G         | CTTC      | AAG     | AGAG          | C-TT       | AA    | AGTTACAT | T           | TTTCC  | CTGAC   | TTAA    | ATGG     | TGATGTG         | G-T   | GGC     | T     | ATT     | GAT   | T         | TATAAAC | ACT         | AC----- | AC               | ACCC  |        |        |             |   |          |   |       |

## SARS-CoV-2 &amp; lambda.apr

|                        |         |               |                    |           |               |               |                     |              |         |          |                |             |
|------------------------|---------|---------------|--------------------|-----------|---------------|---------------|---------------------|--------------|---------|----------|----------------|-------------|
|                        |         |               |                    |           |               |               |                     |              |         |          |                | Section 120 |
|                        | (11544) | 11544         | 11550              | 11560     | 11570         | 11580         | 11590               | 11600        | 11610   | 11620    | 11630          | 11640       |
| lambda NC_001416.1     | (11311) | CTCAG         | TTGCAG             | CGTTCC    | GCGG          | ATGAAGCCGGGGC | ATTG                | CAGGCGGC     | GAAC    | GAGGCCGC | AACG           | AAAG        |
| SARS-CoV-2 NC_045512.2 | (6197)  | T--CT         | TTTAAG             | AAAGGA    | GCTA          | AATT--GTTACAT | AAAC                | C---TATT     | GTTT    | GGCATGTT | AACAA          | T--GC--AAC  |
|                        |         |               |                    |           |               |               |                     |              |         |          |                |             |
|                        |         |               |                    |           |               |               |                     |              |         |          |                | Section 121 |
|                        | (11641) | 11641         | 11650              | 11660     | 11670         | 11680         | 11690               | 11700        | 11710   | 11720    |                | 11737       |
| lambda NC_001416.1     | (11406) | GAGAA         | CATGGGC            | ACGCTGGAG | -----ACC      | TGGGCAGA      | CAGG                | -ACTG        | CGCG    | GGCATTCA | AATC           | CATGTGGG    |
| SARS-CoV-2 NC_045512.2 | (6274)  | TAAAC         | CAAT--             | AC-CTGGT  | G             | TATACGTTGTCTT | TGG                 | AGCA-        | CAAAAC  | CAG      | T-TGAA-----    | ACATCAAA    |
|                        |         |               |                    |           |               |               |                     |              |         |          |                |             |
|                        |         |               |                    |           |               |               |                     |              |         |          |                | Section 122 |
|                        | (11738) | 11738         | 11750              | 11760     | 11770         | 11780         | 11790               | 11800        | 11810   | 11820    |                | 11834       |
| lambda NC_001416.1     | (11491) | GTCCT         | GATAC              | CGCGCAGG  | ---A          | GATGCTGAT     | TAAAG               | GCAGAG       | -GCT    | GCGTAT   | AAGAAAGC       | AGACGAC     |
| SARS-CoV-2 NC_045512.2 | (6354)  | C---A         | GAGGA              | CGCGCAGG  | GAATG         | GATAATCT      | TGCCT               | GCGAAGAT     | CT      | AAAACC   | AGTCTCTGA      | AAGAAGT     |
|                        |         |               |                    |           |               |               |                     |              |         |          |                |             |
|                        |         |               |                    |           |               |               |                     |              |         |          |                | Section 123 |
|                        | (11835) | 11835         | 11840              | 11850     | 11860         | 11870         | 11880               | 11890        | 11900   | 11910    | 11920          | 11931       |
| lambda NC_001416.1     | (11583) | GTT           | AACGATGAAGC        | GC        | GG            | CGCGT         | TACTGGGATGATCGTGAAA | AGG          | CCCGTC  | TGCGC    | TGAA           | AG          |
| SARS-CoV-2 NC_045512.2 | (6441)  | AAG           | ACGTTCTT---        | G         | AGT           | GTAATGT       | TGAAAAC             | TACCGAAGTTGT | AGG     | AGACAT   | TATACT         | TAAAC-      |
|                        |         |               |                    |           |               |               |                     |              |         |          |                |             |
|                        |         |               |                    |           |               |               |                     |              |         |          |                | Section 124 |
|                        | (11932) | 11932         | 11940              | 11950     | 11960         | 11970         | 11980               | 11990        | 12000   | 12010    |                | 12028       |
| lambda NC_001416.1     | (11680) | AGG           | ---ACAAAAATGCGCAGC | AG        | CAG           | AGC           | GATAC               | GAA          | GCGTC   | AC       | GGCT           | GAAATATAC   |
| SARS-CoV-2 NC_045512.2 | (6531)  | AGG           | TTGG-----          | CCACACAG  | AT            | CT-           | AAT                 | GCTG         | CTTA    | TGTAG    | AC             | AAT         |
|                        |         |               |                    |           |               |               |                     |              |         |          |                |             |
|                        |         |               |                    |           |               |               |                     |              |         |          |                | Section 125 |
|                        | (12029) | 12029         | 12040              | 12050     | 12060         | 12070         | 12080               | 12090        | 12100   | 12110    |                | 12125       |
| lambda NC_001416.1     | (11774) | GCTGGAGAAATAT | ACCGC              | CC        | GTCAGGAAGAACT | GAA           | CA                  | GGCA         | -CTGAAA | -GACGGG  | AAAAATCCTGCAGG | CGGATTAC    |
| SARS-CoV-2 NC_045512.2 | (6587)  | -----A        | AGAAA              | CC        | TAAT-----     | GAA           | TTA                 | TCTA         | AG----- | A-----   | GTATT          | AGGT        |
|                        |         |               |                    |           |               |               |                     |              |         |          |                |             |
|                        |         |               |                    |           |               |               |                     |              |         |          |                | Section 126 |
|                        | (12126) | 12126         | 12140              | 12150     | 12160         | 12170         | 12180               | 12190        | 12200   | 12210    |                | 12222       |
| lambda NC_001416.1     | (11869) | C             | GAAAA              | AGGATTA   | T             | GAAGCGA       | CGC                 | -TGAAA       | AAAGC   | C        | GAAACA         | GTCCAG      |
| SARS-CoV-2 NC_045512.2 | (6621)  | T             | GAAAA              | C---      | CC            | TGCTACT       | C                   | ATGGTTT      | A       | GCTG     | CTGTTA         | TAGTGT      |
|                        |         |               |                    |           |               |               |                     |              |         |          |                |             |

## SARS-CoV-2 &amp; lambda.apr

|                        |         |                |                     |              |               |            |                |                |          |            |                   |                  |                          |                 |                       |         |     |              |
|------------------------|---------|----------------|---------------------|--------------|---------------|------------|----------------|----------------|----------|------------|-------------------|------------------|--------------------------|-----------------|-----------------------|---------|-----|--------------|
|                        |         |                |                     |              |               |            |                |                |          |            |                   | Section 127      |                          |                 |                       |         |     |              |
|                        | (12223) | 12223          | 12230               | 12240        | 12250         | 12260      | 12270          | 12280          | 12290    | 12300      | 12319             |                  |                          |                 |                       |         |     |              |
| lambda NC_001416.1     | (11962) | --CCT          | GCTGACGCTTCAGGCAGAA | CTCCGG       | ACGCTGGAGA    | AGCATGCCGG | AG---          | CAAA           | TGAGAAAT | TCAGCC     | ---AGCAGCGCCGGGA  | TTTGTGG          |                          |                 |                       |         |     |              |
| SARS-CoV-2 NC_045512.2 | (6692)  | AAGCCT         | -----               | TTTCT        | TAACAAGT      | TGTTA----  | GTACAA         | -CTA           | CTAA--   | CATAGTTACA | CGGT---GTTTAAACCG | TGTTT-G          |                          |                 |                       |         |     |              |
|                        |         |                |                     |              |               |            |                |                |          |            |                   | Section 128      |                          |                 |                       |         |     |              |
|                        | (12320) | 12320          | 12330               | 12340        | 12350         | 12360      | 12370          | 12380          | 12390    | 12400      | 12416             |                  |                          |                 |                       |         |     |              |
| lambda NC_001416.1     | (12051) | AAGGCGGAG      | ----AGTC            | AGTTGCGGTACT | TGGAG--       | GAGG       | GGCGCAACGT     | CGCCAGCTG      | TCTGCAC  | AGGAGAAAT  | CCTGCTGGCGC       | ATAAAGAT         |                          |                 |                       |         |     |              |
| SARS-CoV-2 NC_045512.2 | (6760)  | TACTAATTATATGC | -CTTAT              | TTCTTTTACTTT | TA---TT       | GCTAC      | CAATTGT-GTAC   | CTTT----       | TACTAGA  | AGTACAAAT  | CTAGAA--          | TTAAGCATCT       |                          |                 |                       |         |     |              |
|                        |         |                |                     |              |               |            |                |                |          |            |                   | Section 129      |                          |                 |                       |         |     |              |
|                        | (12417) | 12417          | 12430               | 12440        | 12450         | 12460      | 12470          | 12480          | 12490    | 12500      | 12513             |                  |                          |                 |                       |         |     |              |
| lambda NC_001416.1     | (12141) | --GAGACGCTGG   | AGT--               | ACAAACGC     | CAGCTGGCTGCAC | TGGCGAC    | AAGGTTAC       | GTATCAG        | GAGCGCC  | TGAACGCGC  | TGGCGCAGCAGGCGGAT | TAAA             |                          |                 |                       |         |     |              |
| SARS-CoV-2 NC_045512.2 | (6845)  | ATGCCGACTACT   | ATAGC               | AAGAATACT    | GTAAAG-AGTGT  | CGGTA-AA   | TTTTTGTCTAG-AG | GCTTCATT       | T-AA     | TTATT      | TGAAGTC-ACCTAATT  | TTTC             |                          |                 |                       |         |     |              |
|                        |         |                |                     |              |               |            |                |                |          |            |                   | Section 130      |                          |                 |                       |         |     |              |
|                        | (12514) | 12514          | 12520               | 12530        | 12540         | 12550      | 12560          | 12570          | 12580    | 12590      | 12600             | 12610            |                          |                 |                       |         |     |              |
| lambda NC_001416.1     | (12234) | TTTCG          | CACAGCAGCA          | ACGGGC       | AAAACGGCCGC   | CAT        | TGATGC         | -GAAAAGCCG     | GGGGCT   | GACTGAC    | CGGCAGG           | CAGAACGGGA       | ---GCCACGGAACAG          |                 |                       |         |     |              |
| SARS-CoV-2 NC_045512.2 | (6937)  | TAAA           | CTG-AT              | AAATATTATA   | TTTG          | TTTTTACTAT | TAAG           | TGTTTGCCCT-AGG | TTCT     | TTA-AT     | CTACTCAA          | CCGCTGCTTT       | AGGTGTTTTAATGTCT         |                 |                       |         |     |              |
|                        |         |                |                     |              |               |            |                |                |          |            |                   | Section 131      |                          |                 |                       |         |     |              |
|                        | (12611) | 12611          | 12620               | 12630        | 12640         | 12650      | 12660          | 12670          | 12680    | 12690      | 12707             |                  |                          |                 |                       |         |     |              |
| lambda NC_001416.1     | (12327) | CGCC           | TGAA---             | GGAACAGT     | ATGGCGAT      | TAATCCGCT  | GGCGCT         | GAA            | TAACGT   | TCATGT     | CAG-AGC           | AGAAAAAGACCT     | TGGG--CGGCTGAAGACCA----- |                 |                       |         |     |              |
| SARS-CoV-2 NC_045512.2 | (7031)  | AATT           | TAGGCAT             | GC---CT      | TCTTACTGT     | -ACTG      | CTTACAGA       | GAA            | GGCTATT  | TGAAC      | TCTACTA           | TGTC             | ACTATGCAACCTA            | CTGTACTGGTTCTAT |                       |         |     |              |
|                        |         |                |                     |              |               |            |                |                |          |            |                   | Section 132      |                          |                 |                       |         |     |              |
|                        | (12708) | 12708          | 12720               | 12730        | 12740         | 12750      | 12760          | 12770          | 12780    | 12790      | 12804             |                  |                          |                 |                       |         |     |              |
| lambda NC_001416.1     | (12413) | ---GCT         | TCGC---             | GGAAC--      | TGGATGGC      | AGGCT      | TGAAGTC        | GGC---         | TGGAGT   | GA         | GTGGGAAGAG        | AGCGCCACG        | -GACAGTATGT              | CGCAGG          | TAAA                  |         |     |              |
| SARS-CoV-2 NC_045512.2 | (7123)  | ACCTTG         | TAGTGT              | TTTGTCTT     | TAG           | TTT        | TAGATTCT       | TTAGACAC       | CTATCCT  | TCTTTA     | GAA               | AACTA-TACA       | AA                       | TTA----         | CCATTT----CATC-TTTT-A |         |     |              |
|                        |         |                |                     |              |               |            |                |                |          |            |                   | Section 133      |                          |                 |                       |         |     |              |
|                        | (12805) | 12805          | 12810               | 12820        | 12830         | 12840      | 12850          | 12860          | 12870    | 12880      | 12890             | 12901            |                          |                 |                       |         |     |              |
| lambda NC_001416.1     | (12497) | AA             | GTGC                | AGCC         | ACGCAGAC      | CTTTG      | ATGGTA         | TTGCA          | CAG      | AAAT       | T--GG             | CGGCGATGCTGACCGG | CAGT                     | GAGCAGAAC       | TGG--CGC              | AGCTT   | CAC | CCGTT        |
| SARS-CoV-2 NC_045512.2 | (7209)  | AA             | TGGG                | ATTT         | A             | ACTG--     | CTTTTG         | GCTTAG         | TTGCA    | GAG        | TGGT              | TTTTG            | GCATATATTCTTTTCA         | CTAG            | GTTTTTCTAT            | TGTACTT | GGA | TTGGCTGCA--- |

## SARS-CoV-2 &amp; lambda.apr

|                        |         |                    |          |         |          |         |            |         |         |                      |             |             |                |              |          |              |            |         |            |               |       |        |         |            |             |      |
|------------------------|---------|--------------------|----------|---------|----------|---------|------------|---------|---------|----------------------|-------------|-------------|----------------|--------------|----------|--------------|------------|---------|------------|---------------|-------|--------|---------|------------|-------------|------|
|                        |         |                    |          |         |          |         |            |         |         |                      |             | Section 134 |                |              |          |              |            |         |            |               |       |        |         |            |             |      |
|                        | (12902) | 12902              | 12910    | 12920   | 12930    | 12940   | 12950      | 12960   | 12970   | 12980                | 12998       |             |                |              |          |              |            |         |            |               |       |        |         |            |             |      |
| lambda NC_001416.1     | (12589) | CCGTGCTGTCCATGATGA | CAGAA    | ATTCTGC | -----    | TTA     | AGCAGGCA   | ATGGTGG | GGATTGT | TCGGAGTATCGGCAGCGCCA | TTGGCGGG    | GCTGTT      |                |              |          |              |            |         |            |               |       |        |         |            |             |      |
| SARS-CoV-2 NC_045512.2 | (7301)  | -ATCATGCAATTGTTT   | CAGCT    | ATTCTGC | AGTACATT | TTA     | TTAGT---   | A       | ATTCTT  | GGCTTATGT            | GGTT--      | AATAA-----  | TTAATCTTGTAC-A |              |          |              |            |         |            |               |       |        |         |            |             |      |
|                        |         |                    |          |         |          |         |            |         |         |                      |             | Section 135 |                |              |          |              |            |         |            |               |       |        |         |            |             |      |
|                        | (12999) | 12999              | 13010    | 13020   | 13030    | 13040   | 13050      | 13060   | 13070   | 13080                | 13095       |             |                |              |          |              |            |         |            |               |       |        |         |            |             |      |
| lambda NC_001416.1     | (12678) | GGTGGCGG           | CGCAT    | TCGCG   | T        | CAGGC   | GGTACAGCCA | TTCA    | GGCCG   | CTGCGGCGAAA          | TTCTCA      | TTT         | TGCAACCGGAGGA  | TTTACGGGAACC | GGCGGC   | AAAT         |            |         |            |               |       |        |         |            |             |      |
| SARS-CoV-2 NC_045512.2 | (7384)  | AA                 | TGGCC    | CGATT   | TCAGCT   | ---     | AT         | GGT     | TAGAATG | TACA                 | T---        | C-----      | TTCT           | TTGCAT-----  | C--AT    | TTTATTATGTAT | GGAA-AGTT  |         |            |               |       |        |         |            |             |      |
|                        |         |                    |          |         |          |         |            |         |         |                      |             | Section 136 |                |              |          |              |            |         |            |               |       |        |         |            |             |      |
|                        | (13096) | 13096              | 13110    | 13120   | 13130    | 13140   | 13150      | 13160   | 13170   | 13180                | 13192       |             |                |              |          |              |            |         |            |               |       |        |         |            |             |      |
| lambda NC_001416.1     | (12775) | ATGAGCC            | CAGCG    | GGGATT  | GTTCACCG | TGGT    | GAGTT      | TGTCT   | TAC     | GAAAGGAGGC           | AAC         | CAGCCG      | GATTGG         | CGTGG        | GGAATC   | TTTAC        | CGGCTGA--- | TGC     |            |               |       |        |         |            |             |      |
| SARS-CoV-2 NC_045512.2 | (7455)  | ATGTGC             | ATGTT    | G       | TAGAC    | GGT     | TGTAA      | TCA     | TCAA    | -CT                  | TGTAT       | GATGT       | TGT-TACA       | AAC          | GTAATA   | GAGCAA       | CAAGAG     | T       | TAC        | AACTATTGTTAAT |       |        |         |            |             |      |
|                        |         |                    |          |         |          |         |            |         |         |                      |             | Section 137 |                |              |          |              |            |         |            |               |       |        |         |            |             |      |
|                        | (13193) | 13193              | 13200    | 13210   | 13220    | 13230   | 13240      | 13250   | 13260   | 13270                | 13289       |             |                |              |          |              |            |         |            |               |       |        |         |            |             |      |
| lambda NC_001416.1     | (12868) | GCGGC              | TATG     | -CCA    | CCGGCGG  | TATGTC  | GTA        | CACCG   | GGCAG   | CATGG                | ---CAGA     | CAGC        | CGGT           | CGCAGGCGT    | ---CCGG  | GACGT        | TTTGA      | G       | CAGAA      | ATAAC         |       |        |         |            |             |      |
| SARS-CoV-2 NC_045512.2 | (7550)  | GGTGT              | TAGAAGGT | CC      | TTTTAT   | TGCTAT  | G---       | CTAAT   | GGAGG   | TAAAG                | GCTTTT      | GCAAC       | ---            | TACACAA      | T        | TGGAATT      | GTGT       | TAAATT  | GTGAT      | ACATTC        |       |        |         |            |             |      |
|                        |         |                    |          |         |          |         |            |         |         |                      |             | Section 138 |                |              |          |              |            |         |            |               |       |        |         |            |             |      |
|                        | (13290) | 13290              | 13300    | 13310   | 13320    | 13330   | 13340      | 13350   | 13360   | 13370                | 13386       |             |                |              |          |              |            |         |            |               |       |        |         |            |             |      |
| lambda NC_001416.1     | (12958) | ATGTGGT            | GATT--   | A       | CAACGAC  | GCA     | C          | GAA     | CG-     | GC                   | AGAT        | AGGT        | CCGG           | CTGCT        | CT       | G            | AAGGCGGT   | GTATGAC | ATGGCC     | CGCAAG        | GGTG  | CCCGT  | GATGA   |            |             |      |
| SARS-CoV-2 NC_045512.2 | (7640)  | TGTGCTG            | G        | TAGTAC  | A        | TTTATTA | G          | TAT     | GAA     | GTT                  | G           | CG          | AGAG           | ACT          | T        | GTCA         | CTA--      | CAGTT-- | TAAAAGACCA | AT            | AAAT  | CCT    | ACTGA-- | CCAGTCTTCT |             |      |
|                        |         |                    |          |         |          |         |            |         |         |                      |             | Section 139 |                |              |          |              |            |         |            |               |       |        |         |            |             |      |
|                        | (13387) | 13387              | 13400    | 13410   | 13420    | 13430   | 13440      | 13450   | 13460   | 13470                | 13483       |             |                |              |          |              |            |         |            |               |       |        |         |            |             |      |
| lambda NC_001416.1     | (13052) | AAT                | TCA---   | GACACAG | ATGC     | GTG     | ATG        | GTG     | GCCTG   | TCT                  | CCGGAGGTGGA | C           | GATGAAGAC      | CTT          | CCGC     | TGGA         | ---        | AAGTGA  | AAAC       | CCGGT         | ATGGA | TGTG   |         |            |             |      |
| SARS-CoV-2 NC_045512.2 | (7730)  | ---                | TACATC   | G       | TTGAT-   | AGT-    | GT         | TACA    | GTG     | AAGAA                | TGGT        | -----       | TCCAT          | C            | -ATCTTTA | CTT          | TG-AT      | TAA     | AGCTGGTCAA | AAAGAC        | CTT-- | ATGAA  | AGAC    |            |             |      |
|                        |         |                    |          |         |          |         |            |         |         |                      |             | Section 140 |                |              |          |              |            |         |            |               |       |        |         |            |             |      |
|                        | (13484) | 13484              | 13490    | 13500   | 13510    | 13520   | 13530      | 13540   | 13550   | 13560                | 13570       | 13580       |                |              |          |              |            |         |            |               |       |        |         |            |             |      |
| lambda NC_001416.1     | (13142) | GCT                | TCGGTC   | CCTTC   | TG       | TAA     | GAA        | AGGT    | GCG     | CTTTGG               | TGA         | TG          | GCTA           | TT--         | CT       | CAGCGA       | GCG        | CT      | TGCC       | G--           | GGC   | TGAATG | CC      | AACCT      | TGAAAACGTAC | AGCG |
| SARS-CoV-2 NC_045512.2 | (7812)  | AT                 | TCTCTCT  | CTCAT   | TT       | TGTTA-  | ACT        | T       | AGAC    | AA-CC                | TGA         | GAGCTA      | ATAA           | CAC          | TAAAG    | GTT          | CAT--      | T       | GCCTAT     | T             | AATG  | TT     | ATAG    | TTTTT      | GATGGT      | A--- |

## SARS-CoV-2 &amp; lambda.apr

|                        |         |                       |                  |                |             |              |              |                |               |                 |                   |    |
|------------------------|---------|-----------------------|------------------|----------------|-------------|--------------|--------------|----------------|---------------|-----------------|-------------------|----|
|                        |         |                       |                  |                |             |              |              |                |               |                 | Section 141       |    |
|                        | (13581) | 13581                 | 13590            | 13600          | 13610       | 13620        | 13630        | 13640          | 13650         | 13660           | 13677             |    |
| lambda NC_001416.1     | (13236) | TGACGCT-----T         | TCTGTCCCC        | GTGAGGA        | GCCACGG     | TACTGGAGTC   | GT           | TTCTGGAAG      | AGCA---CGGG   | -GGCTG          | GAAAT--CCTT       |    |
| SARS-CoV-2 NC_045512.2 | (7902)  | -AATCAAAATGTGAAGAATCA | TCTGCAAAAT       | CAGCGTCT       | GTTTAC--    | TACAGT--     | CAGCTT       | ATGTGTC        | AACCTATACT    | GTTACTAG        | ATCAGGCATT        |    |
|                        |         |                       |                  |                |             |              |              |                |               |                 | Section 142       |    |
|                        | (13678) | 13678                 | 13690            | 13700          | 13710       | 13720        | 13730        | 13740          | 13750         | 13760           | 13774             |    |
| lambda NC_001416.1     | (13313) | CTGTGGACGCC           | GCCTTATGAGTG     | GCGGCAGAT      | AAAAGTG     | GAC-CTGC     | GCAAAATG     | GTCGTCGCGGGT   | CAGTATGCTGCGT | GTTGAGTTCAGCGC  | AGAG              |    |
| SARS-CoV-2 NC_045512.2 | (7994)  | GT--GTCTGAT           | GTTGGTGATAGT     | GCGGAAGT       | T---G       | CAGTTAAAT    | GTTTGATG     | CTACGTTAATA    | CGTTT-T---    | CATCAA-----     | CTTTTA---         |    |
|                        |         |                       |                  |                |             |              |              |                |               |                 | Section 143       |    |
|                        | (13775) | 13775                 | 13780            | 13790          | 13800       | 13810        | 13820        | 13830          | 13840         | 13850           | 13871             |    |
| lambda NC_001416.1     | (13409) | TTTGAACAGGTGGT        | GAACTGATGC       | AGG-ATATC----- | GGCAGGA     | AACACTGAATGA | AATGCACCCGTG | CGGAG-CAGT     | TCGGCCAGC--   | GTGGTGC         |                   |    |
| SARS-CoV-2 NC_045512.2 | (8073)  | -ACGTACCAAT--         | GAAAAAC          | TCAAACA        | CTAGTTGCAAC | TGCAGAA      | GCTGAACCTGCA | AAAGAAATGT     | GTCTT         | AGACAATGTCTT    | ATCTACTTTTAT      |    |
|                        |         |                       |                  |                |             |              |              |                |               |                 | Section 144       |    |
|                        | (13872) | 13872                 | 13880            | 13890          | 13900       | 13910        | 13920        | 13930          | 13940         | 13950           | 13968             |    |
| lambda NC_001416.1     | (13496) | TCTGGGAAATTCGAC       | CCT-GACAGAGGT    | CGGTGGA        | GAACGTTATTT | TTCTGTAA     | TGAGCA       | GAACGAA        | AAAGGTGAG     | CCGGTCACCT--    | GG----CAG-        |    |
| SARS-CoV-2 NC_045512.2 | (8167)  | TTCAAGCAGCTCGG        | CAAGGTTTGTGATTCA | GATGTA--       | GAAACTAAAGA | TGTGTGTTG    | AATGTCTT     | AAAT-T-GT      | CACATCAATCTG  | ACATAGAA        | AGT               |    |
|                        |         |                       |                  |                |             |              |              |                |               |                 | Section 145       |    |
|                        | (13969) | 13969                 | 13980            | 13990          | 14000       | 14010        | 14020        | 14030          | 14040         | 14050           | 14065             |    |
| lambda NC_001416.1     | (13585) | ----GGGCGACAGT        | ATCAGC-GTATC-    | CATT           | CAGGGGAGCG  | GTTT         | TGAACTGA     | ATGGCAAAG      | GCAC          | CAGTACGCGC      | CCCACGCTGACGG---- | TT |
| SARS-CoV-2 NC_045512.2 | (8260)  | TACTGGCGATAGT         | TGTATAA          | CTATATG        | CTCAC       | CATAACAAA    | GTTGAA       | AACATGACAC-CCC | GTGAC--       | CTTGGTGCTTGAT   | TGACTGTAGTGC      |    |
|                        |         |                       |                  |                |             |              |              |                |               |                 | Section 146       |    |
|                        | (14066) | 14066                 | 14080            | 14090          | 14100       | 14110        | 14120        | 14130          | 14140         | 14150           | 14162             |    |
| lambda NC_001416.1     | (13672) | TCTAACCTGTACG         | GATATGGTCACCGGA  | TGGCGGA        | AGATAT      | GCAGAGTC     | TGGT-CGGCGG  | AAAGGTGGTCC    | GGCGTAAGGTTT  | ACGCCGTTT       | CTCTG             |    |
| SARS-CoV-2 NC_045512.2 | (8353)  | GCATCATATTAAT         | GC-GCAGGTAGCAA   | -AAGTCA        | CAACAT      | TGCTTTGAT    | TATGGAACGTT  | AAAGATTTCAT    | GTCAATTGTC    | TGAACAA----     | CTACGA            |    |
|                        |         |                       |                  |                |             |              |              |                |               |                 | Section 147       |    |
|                        | (14163) | 14163                 | 14170            | 14180          | 14190       | 14200        | 14210        | 14220          | 14230         | 14240           | 14259             |    |
| lambda NC_001416.1     | (13768) | GATGCGGTGA            | ACTTCGTCAAC      | GGAACA         | AGTTACGC    | CATCC        | GGAGCAGGA    | AGGTGATCAG     | CCGTGCGC      | -ATTGAGCAGTGC   | AGCGCACTGAGCGCG   |    |
| SARS-CoV-2 NC_045512.2 | (8444)  | AAACAAATACG           | ---TAGTGCT       | GCTAA          | AAAGAA      | TAACTTACC    | TTTT---      | A---AGTTGAC    | -ATGTGC       | AAC-----TA----- | CTAGACAAGTTG      |    |

SARS-CoV-2 & lambda.apr

Genomic alignment of SARS-CoV-2 NC\_045512.2 with reference sequences across 14 sections (148-154). The alignment shows high similarity with some mismatches highlighted in red. The reference sequence is shown in blue, and the SARS-CoV-2 sequence is shown in red. The alignment is presented in a grid format with columns for each section and rows for the reference and SARS-CoV-2 sequences.

| Section | Reference Sequence (lambda NC_001416.1)                                   | SARS-CoV-2 NC_045512.2                                                                                                                                                                                          |
|---------|---------------------------------------------------------------------------|-----------------------------------------------------------------------------------------------------------------------------------------------------------------------------------------------------------------|
| 148     | (14260) 14260 14270 14280 14290 14300 14310 14320 14330 14340 14356       | (13864) (8517) GTGAGTGCCTCCTTTGTACTGTCCACGCAGACGGAACCGGATGGCGCTGTTTCCGGGACGTATCATGCTGGCCAACACCTGCACCTGGACCTATCTTAATGTT---GTAACAACAAAGATAGCACTTAAGGGTGGTA---AAATTGTTAATAA-TTGG---TTGA--AGCAGTT-AATTAAAGTTACACTT  |
| 149     | (14357) 14357 14370 14380 14390 14400 14410 14420 14430 14440 14453       | (13961) (8600) GCGGTGACGAGTGCGGTATATAGCGGTCCGGCTGTCGCGGATGAATATGA--CCAGCCACGTCCTGATCAGCAAGGATAAATGCAGCAATGCCTGTGTTCTCTTTTGTCTGCTATT--TTCTATTTAATAACACCTGTTCATGTCAATGCTAACATACAGCTTTTC---AGTGAAATCA--TAGGA       |
| 150     | (14454) 14454 14460 14470 14480 14490 14500 14510 14520 14530 14540 14550 | (14055) (8690) GA-GCGGTGTGTAAGTTCCGCAATTAAGTCTGCACTTTGGGGGCTTCTTTCCAATAACAACTTTTCGCAAGTAAATCCC-AAGACACAGACAGAATTAACAAAGGCTATTGTAGTGGTGTCACTCGTGACATAGCATTAC-AGATACTTGTTTTGCTAACA---AACATGCTGATTTTGACAC---ATGGTT |
| 151     | (14551) 14551 14560 14570 14580 14590 14600 14610 14620 14630 14647       | (14149) (8779) CAGCGATTCTGGCGCACGCCGGCGATGTGCGCCAGCGGAGTCGTGCGGCTTCGTGGTAAGCACGCGGAGAGGGGGAAAGATATTTCCTCTGCT-AGTACAG-----CGTGTGGTAGTTA--TACTAA-----TGACAAAAGCTTGCCCATTT-----GA--TTGCT--GCAGTTCATAACAAG-AGA      |
| 152     | (14648) 14648 14660 14670 14680 14690 14700 14710 14720 14730 14744       | (14245) (8848) ATATCTCCGGTGAGCCGGAGGCTATTTCCGTATGTC--GCCGGAAGACTGGCTGCAGGAGAAATGCAGGGTGAGATTGTGGCGCTGGTCCACAGCCAGT-GGGTTTGTCTGTCCTGTTTGCCTGGCACGATATTACGCACA-ACATAAG--GTGACTTTTTCATTTCTTACCAGAGTTTGTAG--TGC     |
| 153     | (14745) 14745 14750 14760 14770 14780 14790 14800 14810 14820 14830 14841 | (14340) (8939) ACCCCGGTGGTCTGCTCCCTGGCTGAGTGAGGCCGACCGGCAGCTGAGGTGCAAGTGTATTTGCGTGGTGCTGGTCTGCCGGGGAGCAGTTTCATTAAGTTGGTAACA---CTGTTCACACCATCAAACTTATAG-A-GTACAC--TGACT---TTGCAACATCAGCTT---GTGTTTTGGC--TGCTGAA  |
| 154     | (14842) 14842 14850 14860 14870 14880 14890 14900 14910 14920 14938       | (14437) (9020) GTTCCGCTGTGTGCCGCATCTCACCAGGCGGCGCTTTGAGCACGGTGTGACGGACGTGTACACACTGTTCCGGGATGCTTATCATCTGGCGGGGATTGTTACAAATTTTAAAGATGCTCTGTAAAGC--C-AG-----TACCATATTGT-TATG--ATAC---CAATGTACTA---GAAGGTTCTGTTGCT  |

SARS-CoV-2 & lambda.apr

Genomic alignment of SARS-CoV-2 NC\_045512.2 with the reference genome across six sections (155-161). The alignment shows high sequence identity with some mismatches highlighted in red. The reference genome is shown in blue, and the SARS-CoV-2 sequence is shown in black. The alignment is presented in a grid format with columns for each section and rows for the reference and the sample sequence.

| Section     | Reference (lambda NC_001416.1)                                            | SARS-CoV-2 NC_045512.2                                                                                                                                                                                                              |
|-------------|---------------------------------------------------------------------------|-------------------------------------------------------------------------------------------------------------------------------------------------------------------------------------------------------------------------------------|
| Section 155 | (14939) 14939 14950 14960 14970 14980 14990 15000 15010 15020 15035       | (14534) (9098) GAGATGCCGGACTTTCATCGTGAAGATGACTGGTGCCTAACGGCCA GAATCTCTATCTGGA TAATCTGGAGGCCAGCGGGGCTGTATCAGGTGCCGT<br>TATGAAAG-----TTTACGCCCTGACACACGTTATGTCTCA-----TGATGGCT---CTATTAT-----CAATTTCCTAAC-----                        |
| Section 156 | (15036) 15036 15050 15060 15070 15080 15090 15100 15110 15120 15132       | (14631) (9164) TGT CAGCGGCACAGCCGGGCGATGTGCTGCTGTGCTGTTTGTG-----TTCACT-CAGTGCCGAATCACGCCGAATTACTGCGGCACGCG-CGAAGCT<br>-----ACCTACC----TGAAGGTTCTCTGTAGAGTGTAACAACTTTTGATTCT-----GAGTACTGTAGGCA CCGC ACTTGTGAAGA                     |
| Section 157 | (15133) 15133 15140 15150 15160 15170 15180 15190 15200 15210 15229       | (14722) (9239) GCTGCACCATATTCCTGGAACAACCTGAGCAAACGAGAGAGGTAC--ACGACAAATGCGCAGCGACGCA-CACACTCCCTCTGCGCTCACC GG CAT TGG<br>TCAGAAAGCTGGTGTTTGTTGTATCTACTAGTGGT AGATG GTTACTTAACA-----ATGATTATTACAGATCTTTAC CAGGA--GTTT---TCTG--TGG    |
| Section 158 | (15230) 15230 15240 15250 15260 15270 15280 15290 15300 15310 15326       | (14816) (9325) CCGCGCATCTGCCTTTACGGGGATTTTACAACGATTGTGTCGCCGCATCGACCT-TCGTGTGAA AACGGGGGCTGAAGCCATCCGGGCACTGGCCACAC<br>TG TAGATAT-----GCTGTAAATT TACTTACTAATAATGTTTA-----CACCAC TAAT---TC AACCTA--TT--GGTGC-----TTTGAC              |
| Section 159 | (15327) 15327 15340 15350 15360 15370 15380 15390 15400 15410 15423       | (14912) (9393) AGCTCCCGGC GTTTCGTCAGAAACTGAGCGACGGCTGGTATCAGGTACCGGATTGCCGGCGGGACGTCA GCACGT-CCGGGTTTAACGGCGCAGTTAC<br>-----TATCAGG--CA----TC-TATAGTAGCTGGTGTST---ATTGTA GCTATCGTAGTA-ACATGCCTTGCCTACT-----ATTATTTATGAGGTT          |
| Section 160 | (15424) 15424 15430 15440 15450 15460 15470 15480 15490 15500 15510 15520 | (15008) (9466) ATGAG-ACCTCTGCC TGATGCGC-CTGTAAATTCATATGTGTTCCCAAGAGTCGCCGGGGCCAAAGT CAGGTGGCGGTATTCCAGATTGTCTCTG GGGGCTGCG<br>--TAGAAGAGAGCTTTTGGTGAATA CAGTCATGTAGTGCCTTAAATA-CTTT---ACTATTC-CTTATGTCATTCACTGTACT---CTGTTTAAACA CC |
| Section 161 | (15521) 15521 15530 15540 15550 15560 15570 15580 15590 15600 15617       | (15103) (9553) GCCATTGCCGGA TCATTCTTTTACCGCCGGAGCCA CCGTTGCAGCATGGGGGCGAGCCAT TGGGGCGGTGGTATGACCGGCATCC TGT TTTCTCTC<br>--AGTT---TAC TCATTCTTTACCTGGTGTTTATTCTGTTAT--T TACTTGTACT-----TG--ACATT---TT-ATCTTAC-TAA TGATGTTCTCTT       |

## SARS-CoV-2 &amp; lambda.apr

|                        |         |                                                              |                                                           |           |                   |       |         |         |          |          |            |             |            |          |
|------------------------|---------|--------------------------------------------------------------|-----------------------------------------------------------|-----------|-------------------|-------|---------|---------|----------|----------|------------|-------------|------------|----------|
|                        |         |                                                              |                                                           |           |                   |       |         |         |          |          |            | Section 162 |            |          |
|                        | (15618) | 15618                                                        | 15630                                                     | 15640     | 15650             | 15660 | 15670   | 15680   | 15690    | 15700    | 15714      |             |            |          |
| lambda NC_001416.1     | (15199) | GGTGCAG-TATGGTGCTCGGTGGTGTGGCGCA--GATGCTGGC-----ACCGAAAGCCA  | GAACTCCCCGTATACAGACAACGGATAACGGTAAAGC                     |           |                   |       |         |         |          |          |            |             |            |          |
| SARS-CoV-2 NC_045512.2 | (9631)  | TTTAGCACA-TATTCAGTGGATGTATGTGTTTCACACCTTAGTAGCCTTTCTGGATAA   | CAATTGCT--TATATCATTTGTATTT--CCA----CAAAG                  |           |                   |       |         |         |          |          |            |             |            |          |
|                        |         |                                                              |                                                           |           |                   |       |         |         |          |          |            | Section 163 |            |          |
|                        | (15715) | 15715                                                        | 15720                                                     | 15730     | 15740             | 15750 | 15760   | 15770   | 15780    | 15790    | 15800      | 15811       |            |          |
| lambda NC_001416.1     | (15287) | AGAACACCTATTTTCTCTCACTGGATAACATGGTTCCCAGGSCAATGTTC-TGCCTGTTC | TGTACGGGGAAATGCGCGTGGGGTCA                                |           |                   |       |         |         |          |          |            |             |            |          |
| SARS-CoV-2 NC_045512.2 | (9719)  | C-ATTTCTATTGGTT-T-C-TTTAGTAATTACCTAAAG--AGACGTGTAGTCTTTAATG  | GTGTTCCTTTAGTACTTTTGAAAGAACTGCGCTGCGTGTCAC                |           |                   |       |         |         |          |          |            |             |            |          |
|                        |         |                                                              |                                                           |           |                   |       |         |         |          |          |            | Section 164 |            |          |
|                        | (15812) | 15812                                                        | 15820                                                     | 15830     | 15840             | 15850 | 15860   | 15870   | 15880    | 15890    | 15908      |             |            |          |
| lambda NC_001416.1     | (15382) | TCTCAGGAGATCAGCACGGCAGACGAAGGGGACGGTGTGTCAGG                 | TGTGTGTTGATTGGTCGCTGATGCAAAATGTTTATGTGAACCGC--CTGCGGG     |           |                   |       |         |         |          |          |            |             |            |          |
| SARS-CoV-2 NC_045512.2 | (9811)  | CTTTTTGT-TAAATAAGAAATGTATCTAAAGT-TGCGT                       | AGTGTGTCTATTACCCTTTACGCA--ATATAATAGATACTTAGCTCTTTATTAATAA |           |                   |       |         |         |          |          |            |             |            |          |
|                        |         |                                                              |                                                           |           |                   |       |         |         |          |          |            | Section 165 |            |          |
|                        | (15909) | 15909                                                        | 15920                                                     | 15930     | 15940             | 15950 | 15960   | 15970   | 15980    | 15990    | 16005      |             |            |          |
| lambda NC_001416.1     | (15477) | CGGTTTTG-TCATTTTATGGAGCGTGAAGAAATGGGTA                       | AAGGAAGCAGTAAGGGGCATACCCCGCGCGAAGCGAAGGA                  |           |                   |       |         |         |          |          |            |             |            |          |
| SARS-CoV-2 NC_045512.2 | (9904)  | GTACAAGTATTTTAGTGG-AGCAATGGATACAAC                           | TAGCTACAGAGA-AGCTGCTTGTT-GTCATCTCGCAAAGGCTCTCAATGA        |           |                   |       |         |         |          |          |            |             |            |          |
|                        |         |                                                              |                                                           |           |                   |       |         |         |          |          |            | Section 166 |            |          |
|                        | (16006) | 16006                                                        | 16020                                                     | 16030     | 16040             | 16050 | 16060   | 16070   | 16080    | 16090    | 16102      |             |            |          |
| lambda NC_001416.1     | (15573) | GCTGAGTGTTGATCGATTGCATCAGCGAAGGGCCG                          | ATTGAAGGTCGGTGGATGGCTTAAAAAGCGTGCTGCTGAACAGTACGCCGGT      |           |                   |       |         |         |          |          |            |             |            |          |
| SARS-CoV-2 NC_045512.2 | (9998)  | GGTTCTGAT-GTTCTTTAC----                                      | CAACCACC-ACAAACCTCTATCACCTCAGCTGTTTGCAGAGTG               |           |                   |       |         |         |          |          |            |             |            |          |
|                        |         |                                                              |                                                           |           |                   |       |         |         |          |          |            | Section 167 |            |          |
|                        | (16103) | 16103                                                        | 16110                                                     | 16120     | 16130             | 16140 | 16150   | 16160   | 16170    | 16180    | 16199      |             |            |          |
| lambda NC_001416.1     | (15670) | GAGGGGAATACCAACATATCCGGTGT                                   | CACGGTGGTGTTCGGGCTGGTGAGCAGGAGCAGACTCCGCCGGAGG            |           |                   |       |         |         |          |          |            |             |            |          |
| SARS-CoV-2 NC_045512.2 | (10084) | TGGTAAAGTTGAGGGTTGTATGG-TACAAGTAAC                           | TGTGTTGG----TACAACTACAC----TTAACGGTCTTTGGCTTGA            |           |                   |       |         |         |          |          |            |             |            |          |
|                        |         |                                                              |                                                           |           |                   |       |         |         |          |          |            | Section 168 |            |          |
|                        | (16200) | 16200                                                        | 16210                                                     | 16220     | 16230             | 16240 | 16250   | 16260   | 16270    | 16280    | 16296      |             |            |          |
| lambda NC_001416.1     | (15766) | ACGGTGC                                                      | TGGGTA                                                    | CGGAAGTGA | AATATGACACGC      | CGATC | ACCCGCA | CCATTAC | GTCTGC   | AAACATCG | ACCGTCTGCG | CTTTAC      | CTTCGGT    | TGTACAGG |
| SARS-CoV-2 NC_045512.2 | (10170) | CAAGACAT                                                     | TGTGAT                                                    | CTGCA     | ACCTCT--GAAGACATG | C-TTA | ACCGTA  | ATTAT   | GAG----- | ATTTACTC | ATTCGTAAGT | CTAAT       | CATAATTTCT | TGGTA    |



## SARS-CoV-2 &amp; lambda.apr

|                                |         |       |           |           |                 |            |       |               |           |           |              |       |          |            |       |       |        |           |                |       |          |        |          |       |             |        |      |        |     |     |      |    |      |   |
|--------------------------------|---------|-------|-----------|-----------|-----------------|------------|-------|---------------|-----------|-----------|--------------|-------|----------|------------|-------|-------|--------|-----------|----------------|-------|----------|--------|----------|-------|-------------|--------|------|--------|-----|-----|------|----|------|---|
|                                |         |       |           |           |                 |            |       |               |           |           | Section 169  |       |          |            |       |       |        |           |                |       |          |        |          |       |             |        |      |        |     |     |      |    |      |   |
|                                | (16297) | 16297 | 16310     | 16320     | 16330           | 16340      | 16350 | 16360         | 16370     | 16380     | 16393        |       |          |            |       |       |        |           |                |       |          |        |          |       |             |        |      |        |     |     |      |    |      |   |
| lambda NC_001416.1 (15863)     |         | CA    | CTGGT     | GGA       | ACCA            | CCT        | CAA   | AGGGT         | GACAGG    | AA        | TCCGTCGGAAGT | TC    | GCCTGCTG | GT         | T     | CAG   | A      | ---       | TAC            | AACG  | T        | A      | ACGGT    | GG    | C           | TGGGTG | AC   | G      | AA  | AA  |      |    |      |   |
| SARS-CoV-2 NC_045512.2 (10259) |         | CA    | GGCTG     | G         | TAA             | TGTT       | CAA   | C             | T         | C         | AGGGT        | T     | ---      | ---        | ---   | ---   | ---    | ---       | ---            | ---   | ---      | ---    | ---      | ---   | ---         | ---    | ---  | ---    | --- | --- |      |    |      |   |
|                                |         |       |           |           |                 |            |       |               |           |           | Section 170  |       |          |            |       |       |        |           |                |       |          |        |          |       |             |        |      |        |     |     |      |    |      |   |
|                                | (16394) | 16394 | 16400     | 16410     | 16420           | 16430      | 16440 | 16450         | 16460     | 16470     | 16480        | 16490 |          |            |       |       |        |           |                |       |          |        |          |       |             |        |      |        |     |     |      |    |      |   |
| lambda NC_001416.1 (15957)     |         | A     | -G        | ACATC     | ACCA            | TTA        | AGG   | GCA           | AAAACCA   | CCTC      | ---          | ---   | ---      | ---        | ---   | ---   | ---    | ---       | ---            | ---   | ---      | ---    | ---      | ---   | ---         | ---    | ---  | ---    | --- | --- |      |    |      |   |
| SARS-CoV-2 NC_045512.2 (10350) |         | CTA   | AGTAT     | AAGT      | TT              | GTTC       | GCA   | TTCAAC        | CAGGACAG  | CA        | TT           | TT    | TCAG     | TG         | T     | AG    | CT     | T         | GT             | T     | ACAAT    | GGT    | T        | C     | ACC         | AT     | CT   | G      | T   | T   | T    |    |      |   |
|                                |         |       |           |           |                 |            |       |               |           |           | Section 171  |       |          |            |       |       |        |           |                |       |          |        |          |       |             |        |      |        |     |     |      |    |      |   |
|                                | (16491) | 16491 | 16500     | 16510     | 16520           | 16530      | 16540 | 16550         | 16560     | 16570     | 16587        |       |          |            |       |       |        |           |                |       |          |        |          |       |             |        |      |        |     |     |      |    |      |   |
| lambda NC_001416.1 (16046)     |         | TG    | CG        | ---       | ---             | ---        | ---   | ---           | ---       | ---       | ---          | ---   | ---      | ---        | ---   | ---   | ---    | ---       | ---            | ---   | ---      | ---    | ---      | ---   | ---         | ---    | ---  | ---    | --- | --- |      |    |      |   |
| SARS-CoV-2 NC_045512.2 (10443) |         | TG    | AG        | GCCCAATTT | CA              | CT         | AT    | T             | AAG       | GGTTCATT  | C            | ---   | ---      | ---        | ---   | ---   | ---    | ---       | ---            | ---   | ---      | ---    | ---      | ---   | ---         | ---    | ---  | ---    | --- | --- |      |    |      |   |
|                                |         |       |           |           |                 |            |       |               |           |           | Section 172  |       |          |            |       |       |        |           |                |       |          |        |          |       |             |        |      |        |     |     |      |    |      |   |
|                                | (16588) | 16588 | 16600     | 16610     | 16620           | 16630      | 16640 | 16650         | 16660     | 16670     | 16684        |       |          |            |       |       |        |           |                |       |          |        |          |       |             |        |      |        |     |     |      |    |      |   |
| lambda NC_001416.1 (16123)     |         | ---   | GATGTGAA  | AC        | AG              | TG         | -CT   | A             | CCCGAAC   | AC        | GG           | CACT  | GGTC     | GG         | CG    | GT    | GCA    | GGTGG     | ACTCGGAGCAGTTT | GGC   | AGCCAGCA | GG     | TGAGCCGT | A     | AT          | ---    | ---  | ---    | --- | --- |      |    |      |   |
| SARS-CoV-2 NC_045512.2 (10531) |         | TT    | GTTACATGC | AC        | CA              | TATGG      | A     | ATTACCA       | AC        | TG        | AG           | TT    | TCAT     | G          | CTG   | -     | GCA    | ---       | ---            | ---   | ---      | ---    | ---      | ---   | ---         | ---    | ---  | ---    | --- | --- |      |    |      |   |
|                                |         |       |           |           |                 |            |       |               |           |           | Section 173  |       |          |            |       |       |        |           |                |       |          |        |          |       |             |        |      |        |     |     |      |    |      |   |
|                                | (16685) | 16685 | 16690     | 16700     | 16710           | 16720      | 16730 | 16740         | 16750     | 16760     | 16770        | 16781 |          |            |       |       |        |           |                |       |          |        |          |       |             |        |      |        |     |     |      |    |      |   |
| lambda NC_001416.1 (16210)     |         | TAT   | CA        | TCTGCG    | CG              | GGCGT      | ATT   | CT            | GC        | AGGT      | G            | C     | --       | GT         | CG    | AACTA | TA     | ACCCGC    | A              | -G    | ACGCG    | GC     | AAATACA  | G     | CGGTAT      | CT     | TG   | GGACGG | AA  | C   | GTTT | AA | ACCG | G |
| SARS-CoV-2 NC_045512.2 (10612) |         | TGA   | CA        | GGCAAA    | CAG             | C          | -AC   | AAG           | CA        | GCT       | GGT          | AC    | GGACA    | CA         | ACTAT | TA    | CAGTTA | AT        | G              | TTTTA | GC       | TTGGTT | G        | TACGC | TGCT        | GTTATA | AA   | TG     | GAG | A   | AGGT | G  |      |   |
|                                |         |       |           |           |                 |            |       |               |           |           | Section 174  |       |          |            |       |       |        |           |                |       |          |        |          |       |             |        |      |        |     |     |      |    |      |   |
|                                | (16782) | 16782 | 16790     | 16800     | 16810           | 16820      | 16830 | 16840         | 16850     | 16860     | 16878        |       |          |            |       |       |        |           |                |       |          |        |          |       |             |        |      |        |     |     |      |    |      |   |
| lambda NC_001416.1 (16304)     |         | CA    | T         | A         | CAGC            | AA         | CA    | CATGGCCTGGTGT | CTGTGGGAT | ATG       | CTGACCC      | A     | TCCG     | G          | GCTAC | GGC   | ATG    | GGG       | AA             | ACGT  | T        | CT     | TG       | GGTG  | CGGCGGATGTG | GA     | T    | AA     | ATG |     |      |    |      |   |
| SARS-CoV-2 NC_045512.2 (10708) |         | GT    | TT        | CTCA      | AT              | CA         | TT    | -----         | TACCA     | CAACTCTTA | ATG          | ACTTT | --       | A          | --    | AC    | CTTG   | TG        | GCT            | ATG   | AAGT     | ACAAT  | TTA      | TGAAC | CTCTAACACAA | GACC   | ATGT |        |     |     |      |    |      |   |
|                                |         |       |           |           |                 |            |       |               |           |           | Section 175  |       |          |            |       |       |        |           |                |       |          |        |          |       |             |        |      |        |     |     |      |    |      |   |
|                                | (16879) | 16879 | 16890     | 16900     | 16910           | 16920      | 16930 | 16940         | 16950     | 16960     | 16975        |       |          |            |       |       |        |           |                |       |          |        |          |       |             |        |      |        |     |     |      |    |      |   |
| lambda NC_001416.1 (16401)     |         | G     | CGC       | TGTAT     | GTCATCGGCCAGTAC | TGCGACCAGT | CAG   | TGCCG         | GAC       | GC        | TT           | T     | GCGGCACG | GAGC       | CGCGC | ATC   | ACCTG  | TAATGCGTA | CCTG           | ACCA  | CA       |        |          |       |             |        |      |        |     |     |      |    |      |   |
| SARS-CoV-2 NC_045512.2 (10795) |         | T     | GAC       | TACTAG    | GACCTCTTTCTGC   | -TCAA      | ----- | ACT           | GGAATT    | G         | CG           | TT    | TT       | AGATATGTGT | GCTT  | CA    | -TT    | AAA       | AGAAT          | TA    | -----    | C      | TGC      | AAA   | ATG         |        |      |        |     |     |      |    |      |   |

## SARS-CoV-2 &amp; lambda.apr

|                                |                  |        |         |             |          |         |        |        |       |             |                  |          |                  |              |            |                   |                    |        |               |           |            |              |                 |        |            |        |         |     |     |     |
|--------------------------------|------------------|--------|---------|-------------|----------|---------|--------|--------|-------|-------------|------------------|----------|------------------|--------------|------------|-------------------|--------------------|--------|---------------|-----------|------------|--------------|-----------------|--------|------------|--------|---------|-----|-----|-----|
|                                |                  |        |         |             |          |         |        |        |       | Section 176 |                  |          |                  |              |            |                   |                    |        |               |           |            |              |                 |        |            |        |         |     |     |     |
|                                | (16976)          | 16976  | 16990   | 17000       | 17010    | 17020   | 17030  | 17040  | 17050 | 17060       | 17072            |          |                  |              |            |                   |                    |        |               |           |            |              |                 |        |            |        |         |     |     |     |
| lambda NC_001416.1 (16498)     | CAGC             | GTAA   | GGCG    | TG---       | GGA      | TGT     | GCTCA  | GC     | GA    | TTT         | TCT              | TGCTC    | GGC              | GAT          | TGCGCTGTAT | TGCC              | GG                 | TAT    | TGGAACGGGC    | AG        | ACGCTGAC   | GT           | TCG             | TG     | CAGGAC     |        |         |     |     |     |
| SARS-CoV-2 NC_045512.2 (10878) | GTAT             | GAA    | TGG     | ACGTACCATAT | TGG      | G       | TAGT   | GC     | T     | TT          | TAT              | TAGAA    | GAT              | GA           | ATTTACACC  | TTTT              | GAT                | GT     | TT--          | GTTAG     | ACA        | AATGCTCA     | GG              | TGT    | TAC        | TTT--- |         |     |     |     |
|                                |                  |        |         |             |          |         |        |        |       | Section 177 |                  |          |                  |              |            |                   |                    |        |               |           |            |              |                 |        |            |        |         |     |     |     |
|                                | (17073)          | 17073  | 17080   | 17090       | 17100    | 17110   | 17120  | 17130  | 17140 | 17150       | 17169            |          |                  |              |            |                   |                    |        |               |           |            |              |                 |        |            |        |         |     |     |     |
| lambda NC_001416.1 (16591)     | CGA              | CCG    | TCC     | GGAT        | AAGACGTG | GAC     | CTAT   | AAC    | CGCA  | GTA         | ATGTGGTGAT       | GCC      | G                | GATGATGGCGCG | --         | CCG               | TTC                | CGC    | TAC           | AGCT      | TCAGCG     | CCC          | ----            | ---    | TG         |        |         |     |     |     |
| SARS-CoV-2 NC_045512.2 (10969) | ---              | CC     | AAA     | G           | TGC      | AGTGA   | AAAA   | GAA    | CA--  | AT          | CAAGG            | GTA      | CACACCACTG       | GTT          | G          | TTACTCACAATTTTGAC | TTC                | ACT    | TTT           | AGT       | T          | TTAGT        | CC              | A      | GAGTACT    |        |         |     |     |     |
|                                |                  |        |         |             |          |         |        |        |       | Section 178 |                  |          |                  |              |            |                   |                    |        |               |           |            |              |                 |        |            |        |         |     |     |     |
|                                | (17170)          | 17170  | 17180   | 17190       | 17200    | 17210   | 17220  | 17230  | 17240 | 17250       | 17266            |          |                  |              |            |                   |                    |        |               |           |            |              |                 |        |            |        |         |     |     |     |
| lambda NC_001416.1 (16681)     | AA               | ---    | GAC     | CGCCA       | TAA      | TGCCG   | TTGAGG | TGAA   | CTG   | GAT         | TGACCCGAACAACGGC | TGGG     | AGACGGC          | GAC          | AGAG       | CT                | TG                 | TTGAAG | ATACGCAGGCCAT | TGC       |            |              |                 |        |            |        |         |     |     |     |
| SARS-CoV-2 NC_045512.2 (11060) | CAAT             | ---    | G       | GT          | CTTTG    | TTC     | TTTTT  | TT     | TGTA  | TGAA        | AATG             | CCT      | TTTTTACCTTTTGCTA | TGGG         | TATTATT    | GCT               | ATGT               | CT     | GCT           | TTTGCA    | AA         | ----         | ---             | ---    | ---        | TGATG  | TTT     |     |     |     |
|                                |                  |        |         |             |          |         |        |        |       | Section 179 |                  |          |                  |              |            |                   |                    |        |               |           |            |              |                 |        |            |        |         |     |     |     |
|                                | (17267)          | 17267  | 17280   | 17290       | 17300    | 17310   | 17320  | 17330  | 17340 | 17350       | 17363            |          |                  |              |            |                   |                    |        |               |           |            |              |                 |        |            |        |         |     |     |     |
| lambda NC_001416.1 (16776)     | CCGTTACGGT       | CG     | TAA     | TGT         | TAC      | GAA     | GAT    | TGGAT  | TGCC  | ---         | TTT              | G        | CT               | TGTACCAG     | CCG        | GGGG              | CAG                | GCAC   | ACCGCGCCGGGCT | GTGGC     | TGATTAAAAC | AG           | AACT            |        |            |        |         |     |     |     |
| SARS-CoV-2 NC_045512.2 (11150) | GTCA             | ---    | AA      | CA          | TAA      | GCA     | TGC    | ATTTCT | CTGT  | TTGT        | TTT              | TGT      | T                | ACCTTCT      | CTT        | G                 | CCA                | CT     | G             | TAG       | CTT        | ATTTTAAATATG | GT              | CTA    | TATGCCTGCT | AG     | TTGG    |     |     |     |
|                                |                  |        |         |             |          |         |        |        |       | Section 180 |                  |          |                  |              |            |                   |                    |        |               |           |            |              |                 |        |            |        |         |     |     |     |
|                                | (17364)          | 17364  | 17370   | 17380       | 17390    | 17400   | 17410  | 17420  | 17430 | 17440       | 17450            | 17460    |                  |              |            |                   |                    |        |               |           |            |              |                 |        |            |        |         |     |     |     |
| lambda NC_001416.1 (16872)     | GCTGGAAACGCAGA   | ---    | CG      | TGG         | AT       | TTTCAGC | GT     | CG     | GC    | AG          | AAGGGC           | TT       | CGCCA            | TG           | TAC        | CG                | GG                 | CGAT   | TGTTAT        | TGAAAT    | CTGCG      | ---          | ATGATGAC        | TATG   | CCG        |        |         |     |     |     |
| SARS-CoV-2 NC_045512.2 (11243) | GTGATGCGTATTATGA | CA     | TGG     | T           | TGGATAT  | G       | ---    | TTG    | ATAC  | ---         | T                | ---      | AG               | TT           | TGT        | CT                | GG                 | TTTT   | T             | AAGC      | TAA        | AA           | GA              | CTGT   | GT         | -----  | TATG    | TAT |     |     |
|                                |                  |        |         |             |          |         |        |        |       | Section 181 |                  |          |                  |              |            |                   |                    |        |               |           |            |              |                 |        |            |        |         |     |     |     |
|                                | (17461)          | 17461  | 17470   | 17480       | 17490    | 17500   | 17510  | 17520  | 17530 | 17540       | 17557            |          |                  |              |            |                   |                    |        |               |           |            |              |                 |        |            |        |         |     |     |     |
| lambda NC_001416.1 (16967)     | GT               | ATCAGC | ACCGGTG | GT          | CGTG     | TG      | CTGG   | ---    | GGT   | GAACAGC     | CA               | GACC     | CG               | GACGC        | TGA        | CG                | CT                 | CG     | ACCG          | TGAAATCAC | GCT        | GCCAT        | CCTCCGGTACCGCGC |        |            |        |         |     |     |     |
| SARS-CoV-2 NC_045512.2 (11321) | GC               | ATCAGC | TGTA    | ---         | GT       | G       | ---    | T      | ACT   | TAAT        | CT               | TATGACAG | CA               | AGAACT       | GT         | TGTA              | TGA                | T      | GATGG         | ---       | TGCT       | TAG          | ---             | GAGAGT | ---        | GTGGA  | CACTTAT | --- | --- |     |
|                                |                  |        |         |             |          |         |        |        |       | Section 182 |                  |          |                  |              |            |                   |                    |        |               |           |            |              |                 |        |            |        |         |     |     |     |
|                                | (17558)          | 17558  | 17570   | 17580       | 17590    | 17600   | 17610  | 17620  | 17630 | 17640       | 17654            |          |                  |              |            |                   |                    |        |               |           |            |              |                 |        |            |        |         |     |     |     |
| lambda NC_001416.1 (17063)     | TGAT             | AAG    | CT      | GGTTG       | AC       | GGAAG   | TGGC   | AA     | TCC   | ---         | GGT              | CAG      | CGTGGAGG         | T            | CAG        | T                 | CCGTCACCGACGGCGTGA | AGG    | TAA           | AA        | GTGAGC     | ---          | CGT             | GT     | TCCTGAC    |        |         |     |     |     |
| SARS-CoV-2 NC_045512.2 (11402) | ---              | AA     | T       | GT          | CT       | ---     | TGAC   | AC     | TCGTT | TATA        | AA               | GTTTAT   | TAT              | G            | GT         | ---               | AA                 | T      | G             | CTT       | TAG        | ---          | ---             | ---    | ---        | ---    | ---     | --- | --- | --- |

SARS-CoV-2 & lambda.apr

|                                |         |         |       |       |       |       |       |                     |        |           |       |             |     |        |         |               |      |     |         |        |      |       |     |      |      |       |   |         |      |      |     |      |    |      |   |     |   |   |   |   |   |   |   |   |   |   |   |   |   |   |   |   |   |   |   |   |   |   |   |   |   |   |   |   |   |   |   |   |   |   |   |   |   |   |   |   |   |   |   |   |   |   |   |   |   |   |   |   |   |   |   |   |   |   |   |   |   |   |   |   |   |   |   |   |   |   |   |   |   |   |   |   |   |   |   |   |   |   |   |   |   |   |   |   |   |   |   |   |   |   |   |   |   |   |   |   |   |   |   |   |   |   |   |   |   |   |   |   |   |   |   |   |   |   |   |   |   |   |   |   |   |   |   |   |   |   |   |   |   |   |   |   |   |   |   |   |   |   |   |   |   |   |   |   |   |   |   |   |   |   |   |   |   |   |   |   |   |   |   |   |   |   |   |   |   |   |   |   |   |   |   |   |   |   |   |   |   |   |   |   |   |   |   |   |   |   |   |   |   |   |   |   |   |   |   |   |   |   |   |   |   |   |   |   |   |   |   |   |   |   |   |   |   |   |   |   |   |   |   |   |   |   |   |   |   |   |   |   |   |   |   |   |   |   |   |   |   |   |   |   |   |   |   |   |   |   |   |   |   |   |   |   |   |   |   |   |   |   |   |   |   |   |   |   |   |   |   |   |   |   |   |   |   |   |   |   |   |   |   |   |   |   |   |   |   |   |   |   |   |   |   |   |   |   |   |   |   |   |   |   |   |   |   |   |   |   |   |   |   |   |   |   |   |   |   |   |   |   |   |   |   |   |   |   |   |   |   |   |   |   |   |   |   |   |   |   |   |   |   |   |   |   |   |   |   |   |   |   |   |   |   |   |   |   |   |   |   |   |   |   |   |   |   |   |   |   |   |   |   |   |   |   |   |   |   |   |   |   |   |   |   |   |   |   |   |   |   |   |   |   |   |   |   |   |   |   |   |   |   |   |   |   |   |   |   |   |   |   |   |   |   |   |   |   |   |   |   |   |   |   |   |   |   |   |   |   |   |   |   |   |   |   |   |   |   |   |   |   |   |   |   |   |   |   |   |   |   |   |   |   |   |   |   |   |   |   |   |   |   |   |   |   |   |   |   |   |   |   |   |   |   |   |   |   |   |   |   |   |   |   |   |   |   |   |   |   |   |   |   |   |   |   |   |   |   |   |   |   |   |   |   |   |   |   |   |   |   |   |   |   |   |   |   |   |   |   |   |   |   |   |   |   |   |   |   |   |   |   |   |   |   |   |   |   |   |   |   |   |   |   |   |   |   |   |   |   |   |   |   |   |   |   |   |   |   |   |   |   |   |   |   |   |   |   |   |   |   |   |   |   |   |   |   |   |   |   |   |   |   |   |   |   |   |   |   |   |   |   |   |   |   |   |   |   |   |   |   |   |   |   |   |   |   |   |   |   |   |   |   |   |   |   |   |   |   |   |   |   |   |   |   |   |   |   |   |   |   |   |   |   |   |   |   |   |   |   |   |   |   |   |   |   |   |   |   |   |   |   |   |   |   |   |   |   |   |   |   |   |   |   |   |   |   |   |   |   |   |   |   |   |   |   |   |   |   |   |   |   |   |   |   |   |   |   |   |   |   |   |   |   |   |   |   |   |   |   |   |   |   |   |   |   |   |   |   |   |   |   |   |   |   |   |   |   |   |   |   |   |   |   |   |   |   |   |   |   |   |   |   |   |   |   |   |   |   |   |   |   |   |   |   |   |   |   |   |   |   |   |   |   |   |   |   |   |   |   |   |   |   |   |   |   |   |   |   |   |   |   |   |   |   |   |   |   |   |   |   |   |   |   |   |   |   |   |   |   |   |   |   |   |   |   |   |   |   |   |   |   |   |   |   |   |   |   |   |   |   |   |   |   |   |   |   |   |   |   |   |   |   |   |   |   |   |   |   |   |   |   |   |   |   |   |   |   |   |   |   |   |   |   |   |   |   |   |   |   |   |   |   |   |   |   |   |   |   |   |   |   |   |   |   |   |   |   |   |   |   |   |   |   |   |   |   |   |   |   |   |   |   |   |   |   |   |   |   |   |   |   |   |   |   |   |   |   |   |   |   |   |   |   |   |   |   |   |   |   |   |   |   |   |   |   |   |   |   |   |   |   |   |   |   |   |   |   |   |   |   |   |   |   |   |   |   |   |   |   |   |   |   |   |   |   |   |   |   |   |   |   |   |   |   |   |   |   |   |   |   |   |   |   |   |   |   |   |   |   |   |   |   |   |   |   |   |   |   |   |   |   |   |   |   |   |   |   |   |   |   |   |   |   |   |   |   |   |   |   |   |   |   |   |   |   |   |   |   |   |   |   |   |   |   |   |   |   |   |   |   |   |   |   |   |   |   |   |   |   |   |   |   |   |   |   |   |   |   |   |   |   |   |   |   |   |   |   |   |   |   |   |   |   |   |   |   |   |   |   |   |   |   |   |   |   |   |   |   |   |   |   |   |   |   |   |   |   |   |   |   |   |   |   |   |   |   |   |   |   |   |   |   |   |   |   |   |   |   |   |   |   |   |   |   |   |   |   |   |   |   |   |   |   |   |   |   |   |   |   |   |   |   |   |   |   |   |
|--------------------------------|---------|---------|-------|-------|-------|-------|-------|---------------------|--------|-----------|-------|-------------|-----|--------|---------|---------------|------|-----|---------|--------|------|-------|-----|------|------|-------|---|---------|------|------|-----|------|----|------|---|-----|---|---|---|---|---|---|---|---|---|---|---|---|---|---|---|---|---|---|---|---|---|---|---|---|---|---|---|---|---|---|---|---|---|---|---|---|---|---|---|---|---|---|---|---|---|---|---|---|---|---|---|---|---|---|---|---|---|---|---|---|---|---|---|---|---|---|---|---|---|---|---|---|---|---|---|---|---|---|---|---|---|---|---|---|---|---|---|---|---|---|---|---|---|---|---|---|---|---|---|---|---|---|---|---|---|---|---|---|---|---|---|---|---|---|---|---|---|---|---|---|---|---|---|---|---|---|---|---|---|---|---|---|---|---|---|---|---|---|---|---|---|---|---|---|---|---|---|---|---|---|---|---|---|---|---|---|---|---|---|---|---|---|---|---|---|---|---|---|---|---|---|---|---|---|---|---|---|---|---|---|---|---|---|---|---|---|---|---|---|---|---|---|---|---|---|---|---|---|---|---|---|---|---|---|---|---|---|---|---|---|---|---|---|---|---|---|---|---|---|---|---|---|---|---|---|---|---|---|---|---|---|---|---|---|---|---|---|---|---|---|---|---|---|---|---|---|---|---|---|---|---|---|---|---|---|---|---|---|---|---|---|---|---|---|---|---|---|---|---|---|---|---|---|---|---|---|---|---|---|---|---|---|---|---|---|---|---|---|---|---|---|---|---|---|---|---|---|---|---|---|---|---|---|---|---|---|---|---|---|---|---|---|---|---|---|---|---|---|---|---|---|---|---|---|---|---|---|---|---|---|---|---|---|---|---|---|---|---|---|---|---|---|---|---|---|---|---|---|---|---|---|---|---|---|---|---|---|---|---|---|---|---|---|---|---|---|---|---|---|---|---|---|---|---|---|---|---|---|---|---|---|---|---|---|---|---|---|---|---|---|---|---|---|---|---|---|---|---|---|---|---|---|---|---|---|---|---|---|---|---|---|---|---|---|---|---|---|---|---|---|---|---|---|---|---|---|---|---|---|---|---|---|---|---|---|---|---|---|---|---|---|---|---|---|---|---|---|---|---|---|---|---|---|---|---|---|---|---|---|---|---|---|---|---|---|---|---|---|---|---|---|---|---|---|---|---|---|---|---|---|---|---|---|---|---|---|---|---|---|---|---|---|---|---|---|---|---|---|---|---|---|---|---|---|---|---|---|---|---|---|---|---|---|---|---|---|---|---|---|---|---|---|---|---|---|---|---|---|---|---|---|---|---|---|---|---|---|---|---|---|---|---|---|---|---|---|---|---|---|---|---|---|---|---|---|---|---|---|---|---|---|---|---|---|---|---|---|---|---|---|---|---|---|---|---|---|---|---|---|---|---|---|---|---|---|---|---|---|---|---|---|---|---|---|---|---|---|---|---|---|---|---|---|---|---|---|---|---|---|---|---|---|---|---|---|---|---|---|---|---|---|---|---|---|---|---|---|---|---|---|---|---|---|---|---|---|---|---|---|---|---|---|---|---|---|---|---|---|---|---|---|---|---|---|---|---|---|---|---|---|---|---|---|---|---|---|---|---|---|---|---|---|---|---|---|---|---|---|---|---|---|---|---|---|---|---|---|---|---|---|---|---|---|---|---|---|---|---|---|---|---|---|---|---|---|---|---|---|---|---|---|---|---|---|---|---|---|---|---|---|---|---|---|---|---|---|---|---|---|---|---|---|---|---|---|---|---|---|---|---|---|---|---|---|---|---|---|---|---|---|---|---|---|---|---|---|---|---|---|---|---|---|---|---|---|---|---|---|---|---|---|---|---|---|---|---|---|---|---|---|---|---|---|---|---|---|---|---|---|---|---|---|---|---|---|---|---|---|---|---|---|---|---|---|---|---|---|---|---|---|---|---|---|---|---|---|---|---|---|---|---|---|---|---|---|---|---|---|---|---|---|---|---|---|---|---|---|---|---|---|---|---|---|---|---|---|---|---|---|---|---|---|---|---|---|---|---|---|---|---|---|---|---|---|---|---|---|---|---|---|---|---|---|---|---|---|---|---|---|---|---|---|---|---|---|---|---|---|---|---|---|---|---|---|---|---|---|---|---|---|---|---|---|---|---|---|---|---|---|---|---|---|---|---|---|---|---|---|---|---|---|---|---|---|---|---|---|---|---|---|---|---|---|---|---|---|---|---|---|---|---|---|---|---|---|---|---|---|---|---|---|---|---|---|---|---|---|---|---|---|---|---|---|---|---|---|---|---|---|---|---|---|---|---|---|---|---|---|---|---|---|---|---|---|---|---|---|---|---|---|---|---|---|---|---|---|---|---|---|---|---|---|---|---|---|---|---|---|---|---|---|---|---|---|---|---|---|---|---|---|---|---|---|---|---|---|---|---|---|---|---|---|---|---|---|---|---|---|---|---|---|---|---|---|---|---|---|---|---|---|---|---|---|---|---|---|---|---|---|---|---|---|---|---|---|---|---|---|---|---|---|---|---|---|---|---|---|---|---|---|---|---|---|---|---|---|---|---|---|---|---|---|---|---|---|---|---|---|---|---|---|---|---|---|---|---|---|---|---|---|---|---|---|---|---|---|---|---|---|---|---|---|---|---|---|---|---|
|                                |         |         |       |       |       |       |       |                     |        |           |       | Section 183 |     |        |         |               |      |     |         |        |      |       |     |      |      |       |   |         |      |      |     |      |    |      |   |     |   |   |   |   |   |   |   |   |   |   |   |   |   |   |   |   |   |   |   |   |   |   |   |   |   |   |   |   |   |   |   |   |   |   |   |   |   |   |   |   |   |   |   |   |   |   |   |   |   |   |   |   |   |   |   |   |   |   |   |   |   |   |   |   |   |   |   |   |   |   |   |   |   |   |   |   |   |   |   |   |   |   |   |   |   |   |   |   |   |   |   |   |   |   |   |   |   |   |   |   |   |   |   |   |   |   |   |   |   |   |   |   |   |   |   |   |   |   |   |   |   |   |   |   |   |   |   |   |   |   |   |   |   |   |   |   |   |   |   |   |   |   |   |   |   |   |   |   |   |   |   |   |   |   |   |   |   |   |   |   |   |   |   |   |   |   |   |   |   |   |   |   |   |   |   |   |   |   |   |   |   |   |   |   |   |   |   |   |   |   |   |   |   |   |   |   |   |   |   |   |   |   |   |   |   |   |   |   |   |   |   |   |   |   |   |   |   |   |   |   |   |   |   |   |   |   |   |   |   |   |   |   |   |   |   |   |   |   |   |   |   |   |   |   |   |   |   |   |   |   |   |   |   |   |   |   |   |   |   |   |   |   |   |   |   |   |   |   |   |   |   |   |   |   |   |   |   |   |   |   |   |   |   |   |   |   |   |   |   |   |   |   |   |   |   |   |   |   |   |   |   |   |   |   |   |   |   |   |   |   |   |   |   |   |   |   |   |   |   |   |   |   |   |   |   |   |   |   |   |   |   |   |   |   |   |   |   |   |   |   |   |   |   |   |   |   |   |   |   |   |   |   |   |   |   |   |   |   |   |   |   |   |   |   |   |   |   |   |   |   |   |   |   |   |   |   |   |   |   |   |   |   |   |   |   |   |   |   |   |   |   |   |   |   |   |   |   |   |   |   |   |   |   |   |   |   |   |   |   |   |   |   |   |   |   |   |   |   |   |   |   |   |   |   |   |   |   |   |   |   |   |   |   |   |   |   |   |   |   |   |   |   |   |   |   |   |   |   |   |   |   |   |   |   |   |   |   |   |   |   |   |   |   |   |   |   |   |   |   |   |   |   |   |   |   |   |   |   |   |   |   |   |   |   |   |   |   |   |   |   |   |   |   |   |   |   |   |   |   |   |   |   |   |   |   |   |   |   |   |   |   |   |   |   |   |   |   |   |   |   |   |   |   |   |   |   |   |   |   |   |   |   |   |   |   |   |   |   |   |   |   |   |   |   |   |   |   |   |   |   |   |   |   |   |   |   |   |   |   |   |   |   |   |   |   |   |   |   |   |   |   |   |   |   |   |   |   |   |   |   |   |   |   |   |   |   |   |   |   |   |   |   |   |   |   |   |   |   |   |   |   |   |   |   |   |   |   |   |   |   |   |   |   |   |   |   |   |   |   |   |   |   |   |   |   |   |   |   |   |   |   |   |   |   |   |   |   |   |   |   |   |   |   |   |   |   |   |   |   |   |   |   |   |   |   |   |   |   |   |   |   |   |   |   |   |   |   |   |   |   |   |   |   |   |   |   |   |   |   |   |   |   |   |   |   |   |   |   |   |   |   |   |   |   |   |   |   |   |   |   |   |   |   |   |   |   |   |   |   |   |   |   |   |   |   |   |   |   |   |   |   |   |   |   |   |   |   |   |   |   |   |   |   |   |   |   |   |   |   |   |   |   |   |   |   |   |   |   |   |   |   |   |   |   |   |   |   |   |   |   |   |   |   |   |   |   |   |   |   |   |   |   |   |   |   |   |   |   |   |   |   |   |   |   |   |   |   |   |   |   |   |   |   |   |   |   |   |   |   |   |   |   |   |   |   |   |   |   |   |   |   |   |   |   |   |   |   |   |   |   |   |   |   |   |   |   |   |   |   |   |   |   |   |   |   |   |   |   |   |   |   |   |   |   |   |   |   |   |   |   |   |   |   |   |   |   |   |   |   |   |   |   |   |   |   |   |   |   |   |   |   |   |   |   |   |   |   |   |   |   |   |   |   |   |   |   |   |   |   |   |   |   |   |   |   |   |   |   |   |   |   |   |   |   |   |   |   |   |   |   |   |   |   |   |   |   |   |   |   |   |   |   |   |   |   |   |   |   |   |   |   |   |   |   |   |   |   |   |   |   |   |   |   |   |   |   |   |   |   |   |   |   |   |   |   |   |   |   |   |   |   |   |   |   |   |   |   |   |   |   |   |   |   |   |   |   |   |   |   |   |   |   |   |   |   |   |   |   |   |   |   |   |   |   |   |   |   |   |   |   |   |   |   |   |   |   |   |   |   |   |   |   |   |   |   |   |   |   |   |   |   |   |   |   |   |   |   |   |   |   |   |   |   |   |   |   |   |   |   |   |   |   |   |   |   |   |   |   |   |   |   |   |   |   |   |   |   |   |   |   |   |   |   |   |   |   |   |   |   |   |   |   |   |   |   |   |   |   |   |   |   |   |   |   |   |   |   |   |   |   |   |   |   |   |   |   |   |   |   |   |   |   |   |   |   |   |   |   |   |   |   |   |   |   |   |   |   |   |   |   |   |   |   |   |   |   |   |
|                                | (17655) | 17655   | 17660 | 17670 | 17680 | 17690 | 17700 | 17710               | 17720  | 17730     | 17740 | 17751       |     |        |         |               |      |     |         |        |      |       |     |      |      |       |   |         |      |      |     |      |    |      |   |     |   |   |   |   |   |   |   |   |   |   |   |   |   |   |   |   |   |   |   |   |   |   |   |   |   |   |   |   |   |   |   |   |   |   |   |   |   |   |   |   |   |   |   |   |   |   |   |   |   |   |   |   |   |   |   |   |   |   |   |   |   |   |   |   |   |   |   |   |   |   |   |   |   |   |   |   |   |   |   |   |   |   |   |   |   |   |   |   |   |   |   |   |   |   |   |   |   |   |   |   |   |   |   |   |   |   |   |   |   |   |   |   |   |   |   |   |   |   |   |   |   |   |   |   |   |   |   |   |   |   |   |   |   |   |   |   |   |   |   |   |   |   |   |   |   |   |   |   |   |   |   |   |   |   |   |   |   |   |   |   |   |   |   |   |   |   |   |   |   |   |   |   |   |   |   |   |   |   |   |   |   |   |   |   |   |   |   |   |   |   |   |   |   |   |   |   |   |   |   |   |   |   |   |   |   |   |   |   |   |   |   |   |   |   |   |   |   |   |   |   |   |   |   |   |   |   |   |   |   |   |   |   |   |   |   |   |   |   |   |   |   |   |   |   |   |   |   |   |   |   |   |   |   |   |   |   |   |   |   |   |   |   |   |   |   |   |   |   |   |   |   |   |   |   |   |   |   |   |   |   |   |   |   |   |   |   |   |   |   |   |   |   |   |   |   |   |   |   |   |   |   |   |   |   |   |   |   |   |   |   |   |   |   |   |   |   |   |   |   |   |   |   |   |   |   |   |   |   |   |   |   |   |   |   |   |   |   |   |   |   |   |   |   |   |   |   |   |   |   |   |   |   |   |   |   |   |   |   |   |   |   |   |   |   |   |   |   |   |   |   |   |   |   |   |   |   |   |   |   |   |   |   |   |   |   |   |   |   |   |   |   |   |   |   |   |   |   |   |   |   |   |   |   |   |   |   |   |   |   |   |   |   |   |   |   |   |   |   |   |   |   |   |   |   |   |   |   |   |   |   |   |   |   |   |   |   |   |   |   |   |   |   |   |   |   |   |   |   |   |   |   |   |   |   |   |   |   |   |   |   |   |   |   |   |   |   |   |   |   |   |   |   |   |   |   |   |   |   |   |   |   |   |   |   |   |   |   |   |   |   |   |   |   |   |   |   |   |   |   |   |   |   |   |   |   |   |   |   |   |   |   |   |   |   |   |   |   |   |   |   |   |   |   |   |   |   |   |   |   |   |   |   |   |   |   |   |   |   |   |   |   |   |   |   |   |   |   |   |   |   |   |   |   |   |   |   |   |   |   |   |   |   |   |   |   |   |   |   |   |   |   |   |   |   |   |   |   |   |   |   |   |   |   |   |   |   |   |   |   |   |   |   |   |   |   |   |   |   |   |   |   |   |   |   |   |   |   |   |   |   |   |   |   |   |   |   |   |   |   |   |   |   |   |   |   |   |   |   |   |   |   |   |   |   |   |   |   |   |   |   |   |   |   |   |   |   |   |   |   |   |   |   |   |   |   |   |   |   |   |   |   |   |   |   |   |   |   |   |   |   |   |   |   |   |   |   |   |   |   |   |   |   |   |   |   |   |   |   |   |   |   |   |   |   |   |   |   |   |   |   |   |   |   |   |   |   |   |   |   |   |   |   |   |   |   |   |   |   |   |   |   |   |   |   |   |   |   |   |   |   |   |   |   |   |   |   |   |   |   |   |   |   |   |   |   |   |   |   |   |   |   |   |   |   |   |   |   |   |   |   |   |   |   |   |   |   |   |   |   |   |   |   |   |   |   |   |   |   |   |   |   |   |   |   |   |   |   |   |   |   |   |   |   |   |   |   |   |   |   |   |   |   |   |   |   |   |   |   |   |   |   |   |   |   |   |   |   |   |   |   |   |   |   |   |   |   |   |   |   |   |   |   |   |   |   |   |   |   |   |   |   |   |   |   |   |   |   |   |   |   |   |   |   |   |   |   |   |   |   |   |   |   |   |   |   |   |   |   |   |   |   |   |   |   |   |   |   |   |   |   |   |   |   |   |   |   |   |   |   |   |   |   |   |   |   |   |   |   |   |   |   |   |   |   |   |   |   |   |   |   |   |   |   |   |   |   |   |   |   |   |   |   |   |   |   |   |   |   |   |   |   |   |   |   |   |   |   |   |   |   |   |   |   |   |   |   |   |   |   |   |   |   |   |   |   |   |   |   |   |   |   |   |   |   |   |   |   |   |   |   |   |   |   |   |   |   |   |   |   |   |   |   |   |   |   |   |   |   |   |   |   |   |   |   |   |   |   |   |   |   |   |   |   |   |   |   |   |   |   |   |   |   |   |   |   |   |   |   |   |   |   |   |   |   |   |   |   |   |   |   |   |   |   |   |   |   |   |   |   |   |   |   |   |   |   |   |   |   |   |   |   |   |   |   |   |   |   |   |   |   |   |   |   |   |   |   |   |   |   |   |   |   |   |   |   |   |   |   |   |   |   |   |   |   |   |   |   |   |   |   |   |   |   |   |   |   |   |   |   |   |   |   |   |   |   |   |   |   |   |   |   |   |   |   |   |   |   |   |   |   |   |   |   |   |   |   |   |
| lambda NC_001416.1 (17158)     | GGT     | GTTGCTG | AA    | TACAG | C     | GTA   | TG    | GGAGCTGAAGCTGCCGACG | C      | TGCGCCAGC | G     | ACTGTTCCGC  | TG  | CGT    | GAGT    | TATCCGTGAGAAC | GACG | ACG | GC      | AC     | GT   |       |     |      |      |       |   |         |      |      |     |      |    |      |   |     |   |   |   |   |   |   |   |   |   |   |   |   |   |   |   |   |   |   |   |   |   |   |   |   |   |   |   |   |   |   |   |   |   |   |   |   |   |   |   |   |   |   |   |   |   |   |   |   |   |   |   |   |   |   |   |   |   |   |   |   |   |   |   |   |   |   |   |   |   |   |   |   |   |   |   |   |   |   |   |   |   |   |   |   |   |   |   |   |   |   |   |   |   |   |   |   |   |   |   |   |   |   |   |   |   |   |   |   |   |   |   |   |   |   |   |   |   |   |   |   |   |   |   |   |   |   |   |   |   |   |   |   |   |   |   |   |   |   |   |   |   |   |   |   |   |   |   |   |   |   |   |   |   |   |   |   |   |   |   |   |   |   |   |   |   |   |   |   |   |   |   |   |   |   |   |   |   |   |   |   |   |   |   |   |   |   |   |   |   |   |   |   |   |   |   |   |   |   |   |   |   |   |   |   |   |   |   |   |   |   |   |   |   |   |   |   |   |   |   |   |   |   |   |   |   |   |   |   |   |   |   |   |   |   |   |   |   |   |   |   |   |   |   |   |   |   |   |   |   |   |   |   |   |   |   |   |   |   |   |   |   |   |   |   |   |   |   |   |   |   |   |   |   |   |   |   |   |   |   |   |   |   |   |   |   |   |   |   |   |   |   |   |   |   |   |   |   |   |   |   |   |   |   |   |   |   |   |   |   |   |   |   |   |   |   |   |   |   |   |   |   |   |   |   |   |   |   |   |   |   |   |   |   |   |   |   |   |   |   |   |   |   |   |   |   |   |   |   |   |   |   |   |   |   |   |   |   |   |   |   |   |   |   |   |   |   |   |   |   |   |   |   |   |   |   |   |   |   |   |   |   |   |   |   |   |   |   |   |   |   |   |   |   |   |   |   |   |   |   |   |   |   |   |   |   |   |   |   |   |   |   |   |   |   |   |   |   |   |   |   |   |   |   |   |   |   |   |   |   |   |   |   |   |   |   |   |   |   |   |   |   |   |   |   |   |   |   |   |   |   |   |   |   |   |   |   |   |   |   |   |   |   |   |   |   |   |   |   |   |   |   |   |   |   |   |   |   |   |   |   |   |   |   |   |   |   |   |   |   |   |   |   |   |   |   |   |   |   |   |   |   |   |   |   |   |   |   |   |   |   |   |   |   |   |   |   |   |   |   |   |   |   |   |   |   |   |   |   |   |   |   |   |   |   |   |   |   |   |   |   |   |   |   |   |   |   |   |   |   |   |   |   |   |   |   |   |   |   |   |   |   |   |   |   |   |   |   |   |   |   |   |   |   |   |   |   |   |   |   |   |   |   |   |   |   |   |   |   |   |   |   |   |   |   |   |   |   |   |   |   |   |   |   |   |   |   |   |   |   |   |   |   |   |   |   |   |   |   |   |   |   |   |   |   |   |   |   |   |   |   |   |   |   |   |   |   |   |   |   |   |   |   |   |   |   |   |   |   |   |   |   |   |   |   |   |   |   |   |   |   |   |   |   |   |   |   |   |   |   |   |   |   |   |   |   |   |   |   |   |   |   |   |   |   |   |   |   |   |   |   |   |   |   |   |   |   |   |   |   |   |   |   |   |   |   |   |   |   |   |   |   |   |   |   |   |   |   |   |   |   |   |   |   |   |   |   |   |   |   |   |   |   |   |   |   |   |   |   |   |   |   |   |   |   |   |   |   |   |   |   |   |   |   |   |   |   |   |   |   |   |   |   |   |   |   |   |   |   |   |   |   |   |   |   |   |   |   |   |   |   |   |   |   |   |   |   |   |   |   |   |   |   |   |   |   |   |   |   |   |   |   |   |   |   |   |   |   |   |   |   |   |   |   |   |   |   |   |   |   |   |   |   |   |   |   |   |   |   |   |   |   |   |   |   |   |   |   |   |   |   |   |   |   |   |   |   |   |   |   |   |   |   |   |   |   |   |   |   |   |   |   |   |   |   |   |   |   |   |   |   |   |   |   |   |   |   |   |   |   |   |   |   |   |   |   |   |   |   |   |   |   |   |   |   |   |   |   |   |   |   |   |   |   |   |   |   |   |   |   |   |   |   |   |   |   |   |   |   |   |   |   |   |   |   |   |   |   |   |   |   |   |   |   |   |   |   |   |   |   |   |   |   |   |   |   |   |   |   |   |   |   |   |   |   |   |   |   |   |   |   |   |   |   |   |   |   |   |   |   |   |   |   |   |   |   |   |   |   |   |   |   |   |   |   |   |   |   |   |   |   |   |   |   |   |   |   |   |   |   |   |   |   |   |   |   |   |   |   |   |   |   |   |   |   |   |   |   |   |   |   |   |   |   |   |   |   |   |   |   |   |   |   |   |   |   |   |   |   |   |   |   |   |   |   |   |   |   |   |   |   |   |   |   |   |   |   |   |   |   |   |   |   |   |   |   |   |   |   |   |   |   |   |   |   |   |   |   |   |   |   |   |   |   |   |   |   |   |   |   |   |   |   |   |   |   |   |   |   |   |   |   |   |   |   |   |   |   |   |   |   |   |   |   |   |   |   |   |   |   |   |   |   |   |   |   |   |   |
| SARS-CoV-2 NC_045512.2 (11483) | GTT     | -ACTTCT | AA    | CTACT | C     | AGG   | TG    | TAG-----TTAC-AACTGT | C      | ATGTTTTT  | TG    | GC          | CAG | AGGTAT | TG      | TTT           | TTA  | T   | -G----  | TGTGTT | GAGT | ATT   | GC  | CTA  |      |       |   |         |      |      |     |      |    |      |   |     |   |   |   |   |   |   |   |   |   |   |   |   |   |   |   |   |   |   |   |   |   |   |   |   |   |   |   |   |   |   |   |   |   |   |   |   |   |   |   |   |   |   |   |   |   |   |   |   |   |   |   |   |   |   |   |   |   |   |   |   |   |   |   |   |   |   |   |   |   |   |   |   |   |   |   |   |   |   |   |   |   |   |   |   |   |   |   |   |   |   |   |   |   |   |   |   |   |   |   |   |   |   |   |   |   |   |   |   |   |   |   |   |   |   |   |   |   |   |   |   |   |   |   |   |   |   |   |   |   |   |   |   |   |   |   |   |   |   |   |   |   |   |   |   |   |   |   |   |   |   |   |   |   |   |   |   |   |   |   |   |   |   |   |   |   |   |   |   |   |   |   |   |   |   |   |   |   |   |   |   |   |   |   |   |   |   |   |   |   |   |   |   |   |   |   |   |   |   |   |   |   |   |   |   |   |   |   |   |   |   |   |   |   |   |   |   |   |   |   |   |   |   |   |   |   |   |   |   |   |   |   |   |   |   |   |   |   |   |   |   |   |   |   |   |   |   |   |   |   |   |   |   |   |   |   |   |   |   |   |   |   |   |   |   |   |   |   |   |   |   |   |   |   |   |   |   |   |   |   |   |   |   |   |   |   |   |   |   |   |   |   |   |   |   |   |   |   |   |   |   |   |   |   |   |   |   |   |   |   |   |   |   |   |   |   |   |   |   |   |   |   |   |   |   |   |   |   |   |   |   |   |   |   |   |   |   |   |   |   |   |   |   |   |   |   |   |   |   |   |   |   |   |   |   |   |   |   |   |   |   |   |   |   |   |   |   |   |   |   |   |   |   |   |   |   |   |   |   |   |   |   |   |   |   |   |   |   |   |   |   |   |   |   |   |   |   |   |   |   |   |   |   |   |   |   |   |   |   |   |   |   |   |   |   |   |   |   |   |   |   |   |   |   |   |   |   |   |   |   |   |   |   |   |   |   |   |   |   |   |   |   |   |   |   |   |   |   |   |   |   |   |   |   |   |   |   |   |   |   |   |   |   |   |   |   |   |   |   |   |   |   |   |   |   |   |   |   |   |   |   |   |   |   |   |   |   |   |   |   |   |   |   |   |   |   |   |   |   |   |   |   |   |   |   |   |   |   |   |   |   |   |   |   |   |   |   |   |   |   |   |   |   |   |   |   |   |   |   |   |   |   |   |   |   |   |   |   |   |   |   |   |   |   |   |   |   |   |   |   |   |   |   |   |   |   |   |   |   |   |   |   |   |   |   |   |   |   |   |   |   |   |   |   |   |   |   |   |   |   |   |   |   |   |   |   |   |   |   |   |   |   |   |   |   |   |   |   |   |   |   |   |   |   |   |   |   |   |   |   |   |   |   |   |   |   |   |   |   |   |   |   |   |   |   |   |   |   |   |   |   |   |   |   |   |   |   |   |   |   |   |   |   |   |   |   |   |   |   |   |   |   |   |   |   |   |   |   |   |   |   |   |   |   |   |   |   |   |   |   |   |   |   |   |   |   |   |   |   |   |   |   |   |   |   |   |   |   |   |   |   |   |   |   |   |   |   |   |   |   |   |   |   |   |   |   |   |   |   |   |   |   |   |   |   |   |   |   |   |   |   |   |   |   |   |   |   |   |   |   |   |   |   |   |   |   |   |   |   |   |   |   |   |   |   |   |   |   |   |   |   |   |   |   |   |   |   |   |   |   |   |   |   |   |   |   |   |   |   |   |   |   |   |   |   |   |   |   |   |   |   |   |   |   |   |   |   |   |   |   |   |   |   |   |   |   |   |   |   |   |   |   |   |   |   |   |   |   |   |   |   |   |   |   |   |   |   |   |   |   |   |   |   |   |   |   |   |   |   |   |   |   |   |   |   |   |   |   |   |   |   |   |   |   |   |   |   |   |   |   |   |   |   |   |   |   |   |   |   |   |   |   |   |   |   |   |   |   |   |   |   |   |   |   |   |   |   |   |   |   |   |   |   |   |   |   |   |   |   |   |   |   |   |   |   |   |   |   |   |   |   |   |   |   |   |   |   |   |   |   |   |   |   |   |   |   |   |   |   |   |   |   |   |   |   |   |   |   |   |   |   |   |   |   |   |   |   |   |   |   |   |   |   |   |   |   |   |   |   |   |   |   |   |   |   |   |   |   |   |   |   |   |   |   |   |   |   |   |   |   |   |   |   |   |   |   |   |   |   |   |   |   |   |   |   |   |   |   |   |   |   |   |   |   |   |   |   |   |   |   |   |   |   |   |   |   |   |   |   |   |   |   |   |   |   |   |   |   |   |   |   |   |   |   |   |   |   |   |   |   |   |   |   |   |   |   |   |   |   |   |   |   |   |   |   |   |   |   |   |   |   |   |   |   |   |   |   |   |   |   |   |   |   |   |   |   |   |   |   |   |   |   |   |   |   |   |   |   |   |   |   |   |   |   |   |   |   |   |   |   |   |   |   |   |   |   |   |   |   |   |   |   |   |   |   |   |   |   |   |   |   |   |   |   |   |   |   |   |   |   |   |   |   |   |   |   |   |   |
|                                |         |         |       |       |       |       |       |                     |        |           |       | Section 184 |     |        |         |               |      |     |         |        |      |       |     |      |      |       |   |         |      |      |     |      |    |      |   |     |   |   |   |   |   |   |   |   |   |   |   |   |   |   |   |   |   |   |   |   |   |   |   |   |   |   |   |   |   |   |   |   |   |   |   |   |   |   |   |   |   |   |   |   |   |   |   |   |   |   |   |   |   |   |   |   |   |   |   |   |   |   |   |   |   |   |   |   |   |   |   |   |   |   |   |   |   |   |   |   |   |   |   |   |   |   |   |   |   |   |   |   |   |   |   |   |   |   |   |   |   |   |   |   |   |   |   |   |   |   |   |   |   |   |   |   |   |   |   |   |   |   |   |   |   |   |   |   |   |   |   |   |   |   |   |   |   |   |   |   |   |   |   |   |   |   |   |   |   |   |   |   |   |   |   |   |   |   |   |   |   |   |   |   |   |   |   |   |   |   |   |   |   |   |   |   |   |   |   |   |   |   |   |   |   |   |   |   |   |   |   |   |   |   |   |   |   |   |   |   |   |   |   |   |   |   |   |   |   |   |   |   |   |   |   |   |   |   |   |   |   |   |   |   |   |   |   |   |   |   |   |   |   |   |   |   |   |   |   |   |   |   |   |   |   |   |   |   |   |   |   |   |   |   |   |   |   |   |   |   |   |   |   |   |   |   |   |   |   |   |   |   |   |   |   |   |   |   |   |   |   |   |   |   |   |   |   |   |   |   |   |   |   |   |   |   |   |   |   |   |   |   |   |   |   |   |   |   |   |   |   |   |   |   |   |   |   |   |   |   |   |   |   |   |   |   |   |   |   |   |   |   |   |   |   |   |   |   |   |   |   |   |   |   |   |   |   |   |   |   |   |   |   |   |   |   |   |   |   |   |   |   |   |   |   |   |   |   |   |   |   |   |   |   |   |   |   |   |   |   |   |   |   |   |   |   |   |   |   |   |   |   |   |   |   |   |   |   |   |   |   |   |   |   |   |   |   |   |   |   |   |   |   |   |   |   |   |   |   |   |   |   |   |   |   |   |   |   |   |   |   |   |   |   |   |   |   |   |   |   |   |   |   |   |   |   |   |   |   |   |   |   |   |   |   |   |   |   |   |   |   |   |   |   |   |   |   |   |   |   |   |   |   |   |   |   |   |   |   |   |   |   |   |   |   |   |   |   |   |   |   |   |   |   |   |   |   |   |   |   |   |   |   |   |   |   |   |   |   |   |   |   |   |   |   |   |   |   |   |   |   |   |   |   |   |   |   |   |   |   |   |   |   |   |   |   |   |   |   |   |   |   |   |   |   |   |   |   |   |   |   |   |   |   |   |   |   |   |   |   |   |   |   |   |   |   |   |   |   |   |   |   |   |   |   |   |   |   |   |   |   |   |   |   |   |   |   |   |   |   |   |   |   |   |   |   |   |   |   |   |   |   |   |   |   |   |   |   |   |   |   |   |   |   |   |   |   |   |   |   |   |   |   |   |   |   |   |   |   |   |   |   |   |   |   |   |   |   |   |   |   |   |   |   |   |   |   |   |   |   |   |   |   |   |   |   |   |   |   |   |   |   |   |   |   |   |   |   |   |   |   |   |   |   |   |   |   |   |   |   |   |   |   |   |   |   |   |   |   |   |   |   |   |   |   |   |   |   |   |   |   |   |   |   |   |   |   |   |   |   |   |   |   |   |   |   |   |   |   |   |   |   |   |   |   |   |   |   |   |   |   |   |   |   |   |   |   |   |   |   |   |   |   |   |   |   |   |   |   |   |   |   |   |   |   |   |   |   |   |   |   |   |   |   |   |   |   |   |   |   |   |   |   |   |   |   |   |   |   |   |   |   |   |   |   |   |   |   |   |   |   |   |   |   |   |   |   |   |   |   |   |   |   |   |   |   |   |   |   |   |   |   |   |   |   |   |   |   |   |   |   |   |   |   |   |   |   |   |   |   |   |   |   |   |   |   |   |   |   |   |   |   |   |   |   |   |   |   |   |   |   |   |   |   |   |   |   |   |   |   |   |   |   |   |   |   |   |   |   |   |   |   |   |   |   |   |   |   |   |   |   |   |   |   |   |   |   |   |   |   |   |   |   |   |   |   |   |   |   |   |   |   |   |   |   |   |   |   |   |   |   |   |   |   |   |   |   |   |   |   |   |   |   |   |   |   |   |   |   |   |   |   |   |   |   |   |   |   |   |   |   |   |   |   |   |   |   |   |   |   |   |   |   |   |   |   |   |   |   |   |   |   |   |   |   |   |   |   |   |   |   |   |   |   |   |   |   |   |   |   |   |   |   |   |   |   |   |   |   |   |   |   |   |   |   |   |   |   |   |   |   |   |   |   |   |   |   |   |   |   |   |   |   |   |   |   |   |   |   |   |   |   |   |   |   |   |   |   |   |   |   |   |   |   |   |   |   |   |   |   |   |   |   |   |   |   |   |   |   |   |   |   |   |   |   |   |   |   |   |   |   |   |   |   |   |   |   |   |   |   |   |   |   |   |   |   |   |   |   |   |   |   |   |   |   |   |   |   |   |   |   |   |   |   |   |   |   |   |   |   |   |   |   |   |   |   |   |   |   |   |   |   |   |   |   |   |   |   |   |   |   |   |   |   |   |   |   |
|                                | (17752) | 17752   | 17760 | 17770 | 17780 | 17790 | 17800 | 17810               | 17820  | 17830     | 17848 |             |     |        |         |               |      |     |         |        |      |       |     |      |      |       |   |         |      |      |     |      |    |      |   |     |   |   |   |   |   |   |   |   |   |   |   |   |   |   |   |   |   |   |   |   |   |   |   |   |   |   |   |   |   |   |   |   |   |   |   |   |   |   |   |   |   |   |   |   |   |   |   |   |   |   |   |   |   |   |   |   |   |   |   |   |   |   |   |   |   |   |   |   |   |   |   |   |   |   |   |   |   |   |   |   |   |   |   |   |   |   |   |   |   |   |   |   |   |   |   |   |   |   |   |   |   |   |   |   |   |   |   |   |   |   |   |   |   |   |   |   |   |   |   |   |   |   |   |   |   |   |   |   |   |   |   |   |   |   |   |   |   |   |   |   |   |   |   |   |   |   |   |   |   |   |   |   |   |   |   |   |   |   |   |   |   |   |   |   |   |   |   |   |   |   |   |   |   |   |   |   |   |   |   |   |   |   |   |   |   |   |   |   |   |   |   |   |   |   |   |   |   |   |   |   |   |   |   |   |   |   |   |   |   |   |   |   |   |   |   |   |   |   |   |   |   |   |   |   |   |   |   |   |   |   |   |   |   |   |   |   |   |   |   |   |   |   |   |   |   |   |   |   |   |   |   |   |   |   |   |   |   |   |   |   |   |   |   |   |   |   |   |   |   |   |   |   |   |   |   |   |   |   |   |   |   |   |   |   |   |   |   |   |   |   |   |   |   |   |   |   |   |   |   |   |   |   |   |   |   |   |   |   |   |   |   |   |   |   |   |   |   |   |   |   |   |   |   |   |   |   |   |   |   |   |   |   |   |   |   |   |   |   |   |   |   |   |   |   |   |   |   |   |   |   |   |   |   |   |   |   |   |   |   |   |   |   |   |   |   |   |   |   |   |   |   |   |   |   |   |   |   |   |   |   |   |   |   |   |   |   |   |   |   |   |   |   |   |   |   |   |   |   |   |   |   |   |   |   |   |   |   |   |   |   |   |   |   |   |   |   |   |   |   |   |   |   |   |   |   |   |   |   |   |   |   |   |   |   |   |   |   |   |   |   |   |   |   |   |   |   |   |   |   |   |   |   |   |   |   |   |   |   |   |   |   |   |   |   |   |   |   |   |   |   |   |   |   |   |   |   |   |   |   |   |   |   |   |   |   |   |   |   |   |   |   |   |   |   |   |   |   |   |   |   |   |   |   |   |   |   |   |   |   |   |   |   |   |   |   |   |   |   |   |   |   |   |   |   |   |   |   |   |   |   |   |   |   |   |   |   |   |   |   |   |   |   |   |   |   |   |   |   |   |   |   |   |   |   |   |   |   |   |   |   |   |   |   |   |   |   |   |   |   |   |   |   |   |   |   |   |   |   |   |   |   |   |   |   |   |   |   |   |   |   |   |   |   |   |   |   |   |   |   |   |   |   |   |   |   |   |   |   |   |   |   |   |   |   |   |   |   |   |   |   |   |   |   |   |   |   |   |   |   |   |   |   |   |   |   |   |   |   |   |   |   |   |   |   |   |   |   |   |   |   |   |   |   |   |   |   |   |   |   |   |   |   |   |   |   |   |   |   |   |   |   |   |   |   |   |   |   |   |   |   |   |   |   |   |   |   |   |   |   |   |   |   |   |   |   |   |   |   |   |   |   |   |   |   |   |   |   |   |   |   |   |   |   |   |   |   |   |   |   |   |   |   |   |   |   |   |   |   |   |   |   |   |   |   |   |   |   |   |   |   |   |   |   |   |   |   |   |   |   |   |   |   |   |   |   |   |   |   |   |   |   |   |   |   |   |   |   |   |   |   |   |   |   |   |   |   |   |   |   |   |   |   |   |   |   |   |   |   |   |   |   |   |   |   |   |   |   |   |   |   |   |   |   |   |   |   |   |   |   |   |   |   |   |   |   |   |   |   |   |   |   |   |   |   |   |   |   |   |   |   |   |   |   |   |   |   |   |   |   |   |   |   |   |   |   |   |   |   |   |   |   |   |   |   |   |   |   |   |   |   |   |   |   |   |   |   |   |   |   |   |   |   |   |   |   |   |   |   |   |   |   |   |   |   |   |   |   |   |   |   |   |   |   |   |   |   |   |   |   |   |   |   |   |   |   |   |   |   |   |   |   |   |   |   |   |   |   |   |   |   |   |   |   |   |   |   |   |   |   |   |   |   |   |   |   |   |   |   |   |   |   |   |   |   |   |   |   |   |   |   |   |   |   |   |   |   |   |   |   |   |   |   |   |   |   |   |   |   |   |   |   |   |   |   |   |   |   |   |   |   |   |   |   |   |   |   |   |   |   |   |   |   |   |   |   |   |   |   |   |   |   |   |   |   |   |   |   |   |   |   |   |   |   |   |   |   |   |   |   |   |   |   |   |   |   |   |   |   |   |   |   |   |   |   |   |   |   |   |   |   |   |   |   |   |   |   |   |   |   |   |   |   |   |   |   |   |   |   |   |   |   |   |   |   |   |   |   |   |   |   |   |   |   |   |   |   |   |   |   |   |   |   |   |   |   |   |   |   |   |   |   |   |   |   |   |   |   |   |   |   |   |   |   |   |   |   |   |   |   |   |   |   |   |   |   |   |   |   |   |   |   |   |   |   |   |   |   |
| lambda NC_001416.1 (17255)     | A       | TGC     | CA    | TCA   | CCG   | C     | G     | TGC                 | AGCATG | TG        | C     | -G          | AA  | AA     | GAGGCCA | T             | CG   | T   | G       | A      | T    | AACGG | GGC | GCAC | TTTG | ACGGC | G | AACAGAG | TGGC | ACGG | T   | GAA  | T  | GGTG |   |     |   |   |   |   |   |   |   |   |   |   |   |   |   |   |   |   |   |   |   |   |   |   |   |   |   |   |   |   |   |   |   |   |   |   |   |   |   |   |   |   |   |   |   |   |   |   |   |   |   |   |   |   |   |   |   |   |   |   |   |   |   |   |   |   |   |   |   |   |   |   |   |   |   |   |   |   |   |   |   |   |   |   |   |   |   |   |   |   |   |   |   |   |   |   |   |   |   |   |   |   |   |   |   |   |   |   |   |   |   |   |   |   |   |   |   |   |   |   |   |   |   |   |   |   |   |   |   |   |   |   |   |   |   |   |   |   |   |   |   |   |   |   |   |   |   |   |   |   |   |   |   |   |   |   |   |   |   |   |   |   |   |   |   |   |   |   |   |   |   |   |   |   |   |   |   |   |   |   |   |   |   |   |   |   |   |   |   |   |   |   |   |   |   |   |   |   |   |   |   |   |   |   |   |   |   |   |   |   |   |   |   |   |   |   |   |   |   |   |   |   |   |   |   |   |   |   |   |   |   |   |   |   |   |   |   |   |   |   |   |   |   |   |   |   |   |   |   |   |   |   |   |   |   |   |   |   |   |   |   |   |   |   |   |   |   |   |   |   |   |   |   |   |   |   |   |   |   |   |   |   |   |   |   |   |   |   |   |   |   |   |   |   |   |   |   |   |   |   |   |   |   |   |   |   |   |   |   |   |   |   |   |   |   |   |   |   |   |   |   |   |   |   |   |   |   |   |   |   |   |   |   |   |   |   |   |   |   |   |   |   |   |   |   |   |   |   |   |   |   |   |   |   |   |   |   |   |   |   |   |   |   |   |   |   |   |   |   |   |   |   |   |   |   |   |   |   |   |   |   |   |   |   |   |   |   |   |   |   |   |   |   |   |   |   |   |   |   |   |   |   |   |   |   |   |   |   |   |   |   |   |   |   |   |   |   |   |   |   |   |   |   |   |   |   |   |   |   |   |   |   |   |   |   |   |   |   |   |   |   |   |   |   |   |   |   |   |   |   |   |   |   |   |   |   |   |   |   |   |   |   |   |   |   |   |   |   |   |   |   |   |   |   |   |   |   |   |   |   |   |   |   |   |   |   |   |   |   |   |   |   |   |   |   |   |   |   |   |   |   |   |   |   |   |   |   |   |   |   |   |   |   |   |   |   |   |   |   |   |   |   |   |   |   |   |   |   |   |   |   |   |   |   |   |   |   |   |   |   |   |   |   |   |   |   |   |   |   |   |   |   |   |   |   |   |   |   |   |   |   |   |   |   |   |   |   |   |   |   |   |   |   |   |   |   |   |   |   |   |   |   |   |   |   |   |   |   |   |   |   |   |   |   |   |   |   |   |   |   |   |   |   |   |   |   |   |   |   |   |   |   |   |   |   |   |   |   |   |   |   |   |   |   |   |   |   |   |   |   |   |   |   |   |   |   |   |   |   |   |   |   |   |   |   |   |   |   |   |   |   |   |   |   |   |   |   |   |   |   |   |   |   |   |   |   |   |   |   |   |   |   |   |   |   |   |   |   |   |   |   |   |   |   |   |   |   |   |   |   |   |   |   |   |   |   |   |   |   |   |   |   |   |   |   |   |   |   |   |   |   |   |   |   |   |   |   |   |   |   |   |   |   |   |   |   |   |   |   |   |   |   |   |   |   |   |   |   |   |   |   |   |   |   |   |   |   |   |   |   |   |   |   |   |   |   |   |   |   |   |   |   |   |   |   |   |   |   |   |   |   |   |   |   |   |   |   |   |   |   |   |   |   |   |   |   |   |   |   |   |   |   |   |   |   |   |   |   |   |   |   |   |   |   |   |   |   |   |   |   |   |   |   |   |   |   |   |   |   |   |   |   |   |   |   |   |   |   |   |   |   |   |   |   |   |   |   |   |   |   |   |   |   |   |   |   |   |   |   |   |   |   |   |   |   |   |   |   |   |   |   |   |   |   |   |   |   |   |   |   |   |   |   |   |   |   |   |   |   |   |   |   |   |   |   |   |   |   |   |   |   |   |   |   |   |   |   |   |   |   |   |   |   |   |   |   |   |   |   |   |   |   |   |   |   |   |   |   |   |   |   |   |   |   |   |   |   |   |   |   |   |   |   |   |   |   |   |   |   |   |   |   |   |   |   |   |   |   |   |   |   |   |   |   |   |   |   |   |   |   |   |   |   |   |   |   |   |   |   |   |   |   |   |   |   |   |   |   |   |   |   |   |   |   |   |   |   |   |   |   |   |   |   |   |   |   |   |   |   |   |   |   |   |   |   |   |   |   |   |   |   |   |   |   |   |   |   |   |   |   |   |   |   |   |   |   |   |   |   |   |   |   |   |   |   |   |   |   |   |   |   |   |   |   |   |   |   |   |   |   |   |   |   |   |   |   |   |   |   |   |   |   |   |   |   |   |   |   |   |   |   |   |   |   |   |   |   |   |   |   |   |   |   |   |   |   |   |   |   |   |   |   |   |   |   |   |   |   |   |   |   |   |   |   |   |   |   |   |   |   |   |   |   |   |   |   |   |   |   |   |   |   |   |   |   |   |   |   |   |
| SARS-CoV-2 NC_045512.2 (11568) | T       | TTT     | CT    | TCA   | TAA   | CT    | G     | GTA                 | A      | TACAC     | T     | C           | AGT | G      | T       | A             | T    | AA  | TGCTAGT | T      | A    | T     | T   | G    | T    | T     | C | T       | T    | AA   | GGC | CTCT | T  | TTG  | T | TAC |   |   |   |   |   |   |   |   |   |   |   |   |   |   |   |   |   |   |   |   |   |   |   |   |   |   |   |   |   |   |   |   |   |   |   |   |   |   |   |   |   |   |   |   |   |   |   |   |   |   |   |   |   |   |   |   |   |   |   |   |   |   |   |   |   |   |   |   |   |   |   |   |   |   |   |   |   |   |   |   |   |   |   |   |   |   |   |   |   |   |   |   |   |   |   |   |   |   |   |   |   |   |   |   |   |   |   |   |   |   |   |   |   |   |   |   |   |   |   |   |   |   |   |   |   |   |   |   |   |   |   |   |   |   |   |   |   |   |   |   |   |   |   |   |   |   |   |   |   |   |   |   |   |   |   |   |   |   |   |   |   |   |   |   |   |   |   |   |   |   |   |   |   |   |   |   |   |   |   |   |   |   |   |   |   |   |   |   |   |   |   |   |   |   |   |   |   |   |   |   |   |   |   |   |   |   |   |   |   |   |   |   |   |   |   |   |   |   |   |   |   |   |   |   |   |   |   |   |   |   |   |   |   |   |   |   |   |   |   |   |   |   |   |   |   |   |   |   |   |   |   |   |   |   |   |   |   |   |   |   |   |   |   |   |   |   |   |   |   |   |   |   |   |   |   |   |   |   |   |   |   |   |   |   |   |   |   |   |   |   |   |   |   |   |   |   |   |   |   |   |   |   |   |   |   |   |   |   |   |   |   |   |   |   |   |   |   |   |   |   |   |   |   |   |   |   |   |   |   |   |   |   |   |   |   |   |   |   |   |   |   |   |   |   |   |   |   |   |   |   |   |   |   |   |   |   |   |   |   |   |   |   |   |   |   |   |   |   |   |   |   |   |   |   |   |   |   |   |   |   |   |   |   |   |   |   |   |   |   |   |   |   |   |   |   |   |   |   |   |   |   |   |   |   |   |   |   |   |   |   |   |   |   |   |   |   |   |   |   |   |   |   |   |   |   |   |   |   |   |   |   |   |   |   |   |   |   |   |   |   |   |   |   |   |   |   |   |   |   |   |   |   |   |   |   |   |   |   |   |   |   |   |   |   |   |   |   |   |   |   |   |   |   |   |   |   |   |   |   |   |   |   |   |   |   |   |   |   |   |   |   |   |   |   |   |   |   |   |   |   |   |   |   |   |   |   |   |   |   |   |   |   |   |   |   |   |   |   |   |   |   |   |   |   |   |   |   |   |   |   |   |   |   |   |   |   |   |   |   |   |   |   |   |   |   |   |   |   |   |   |   |   |   |   |   |   |   |   |   |   |   |   |   |   |   |   |   |   |   |   |   |   |   |   |   |   |   |   |   |   |   |   |   |   |   |   |   |   |   |   |   |   |   |   |   |   |   |   |   |   |   |   |   |   |   |   |   |   |   |   |   |   |   |   |   |   |   |   |   |   |   |   |   |   |   |   |   |   |   |   |   |   |   |   |   |   |   |   |   |   |   |   |   |   |   |   |   |   |   |   |   |   |   |   |   |   |   |   |   |   |   |   |   |   |   |   |   |   |   |   |   |   |   |   |   |   |   |   |   |   |   |   |   |   |   |   |   |   |   |   |   |   |   |   |   |   |   |   |   |   |   |   |   |   |   |   |   |   |   |   |   |   |   |   |   |   |   |   |   |   |   |   |   |   |   |   |   |   |   |   |   |   |   |   |   |   |   |   |   |   |   |   |   |   |   |   |   |   |   |   |   |   |   |   |   |   |   |   |   |   |   |   |   |   |   |   |   |   |   |   |   |   |   |   |   |   |   |   |   |   |   |   |   |   |   |   |   |   |   |   |   |   |   |   |   |   |   |   |   |   |   |   |   |   |   |   |   |   |   |   |   |   |   |   |   |   |   |   |   |   |   |   |   |   |   |   |   |   |   |   |   |   |   |   |   |   |   |   |   |   |   |   |   |   |   |   |   |   |   |   |   |   |   |   |   |   |   |   |   |   |   |   |   |   |   |   |   |   |   |   |   |   |   |   |   |   |   |   |   |   |   |   |   |   |   |   |   |   |   |   |   |   |   |   |   |   |   |   |   |   |   |   |   |   |   |   |   |   |   |   |   |   |   |   |   |   |   |   |   |   |   |   |   |   |   |   |   |   |   |   |   |   |   |   |   |   |   |   |   |   |   |   |   |   |   |   |   |   |   |   |   |   |   |   |   |   |   |   |   |   |   |   |   |   |   |   |   |   |   |   |   |   |   |   |   |   |   |   |   |   |   |   |   |   |   |   |   |   |   |   |   |   |   |   |   |   |   |   |   |   |   |   |   |   |   |   |   |   |   |   |   |   |   |   |   |   |   |   |   |   |   |   |   |   |   |   |   |   |   |   |   |   |   |   |   |   |   |   |   |   |   |   |   |   |   |   |   |   |   |   |   |   |   |   |   |   |   |   |   |   |   |   |   |   |   |   |   |   |   |   |   |   |   |   |   |   |   |   |   |   |   |   |   |   |   |   |   |   |   |   |   |   |   |   |   |   |   |   |   |   |   |   |   |   |   |   |   |   |   |   |   |   |   |   |   |   |   |   |   |   |   |   |   |   |   |   |   |
|                                |         |         |       |       |       |       |       |                     |        |           |       | Section 185 |     |        |         |               |      |     |         |        |      |       |     |      |      |       |   |         |      |      |     |      |    |      |   |     |   |   |   |   |   |   |   |   |   |   |   |   |   |   |   |   |   |   |   |   |   |   |   |   |   |   |   |   |   |   |   |   |   |   |   |   |   |   |   |   |   |   |   |   |   |   |   |   |   |   |   |   |   |   |   |   |   |   |   |   |   |   |   |   |   |   |   |   |   |   |   |   |   |   |   |   |   |   |   |   |   |   |   |   |   |   |   |   |   |   |   |   |   |   |   |   |   |   |   |   |   |   |   |   |   |   |   |   |   |   |   |   |   |   |   |   |   |   |   |   |   |   |   |   |   |   |   |   |   |   |   |   |   |   |   |   |   |   |   |   |   |   |   |   |   |   |   |   |   |   |   |   |   |   |   |   |   |   |   |   |   |   |   |   |   |   |   |   |   |   |   |   |   |   |   |   |   |   |   |   |   |   |   |   |   |   |   |   |   |   |   |   |   |   |   |   |   |   |   |   |   |   |   |   |   |   |   |   |   |   |   |   |   |   |   |   |   |   |   |   |   |   |   |   |   |   |   |   |   |   |   |   |   |   |   |   |   |   |   |   |   |   |   |   |   |   |   |   |   |   |   |   |   |   |   |   |   |   |   |   |   |   |   |   |   |   |   |   |   |   |   |   |   |   |   |   |   |   |   |   |   |   |   |   |   |   |   |   |   |   |   |   |   |   |   |   |   |   |   |   |   |   |   |   |   |   |   |   |   |   |   |   |   |   |   |   |   |   |   |   |   |   |   |   |   |   |   |   |   |   |   |   |   |   |   |   |   |   |   |   |   |   |   |   |   |   |   |   |   |   |   |   |   |   |   |   |   |   |   |   |   |   |   |   |   |   |   |   |   |   |   |   |   |   |   |   |   |   |   |   |   |   |   |   |   |   |   |   |   |   |   |   |   |   |   |   |   |   |   |   |   |   |   |   |   |   |   |   |   |   |   |   |   |   |   |   |   |   |   |   |   |   |   |   |   |   |   |   |   |   |   |   |   |   |   |   |   |   |   |   |   |   |   |   |   |   |   |   |   |   |   |   |   |   |   |   |   |   |   |   |   |   |   |   |   |   |   |   |   |   |   |   |   |   |   |   |   |   |   |   |   |   |   |   |   |   |   |   |   |   |   |   |   |   |   |   |   |   |   |   |   |   |   |   |   |   |   |   |   |   |   |   |   |   |   |   |   |   |   |   |   |   |   |   |   |   |   |   |   |   |   |   |   |   |   |   |   |   |   |   |   |   |   |   |   |   |   |   |   |   |   |   |   |   |   |   |   |   |   |   |   |   |   |   |   |   |   |   |   |   |   |   |   |   |   |   |   |   |   |   |   |   |   |   |   |   |   |   |   |   |   |   |   |   |   |   |   |   |   |   |   |   |   |   |   |   |   |   |   |   |   |   |   |   |   |   |   |   |   |   |   |   |   |   |   |   |   |   |   |   |   |   |   |   |   |   |   |   |   |   |   |   |   |   |   |   |   |   |   |   |   |   |   |   |   |   |   |   |   |   |   |   |   |   |   |   |   |   |   |   |   |   |   |   |   |   |   |   |   |   |   |   |   |   |   |   |   |   |   |   |   |   |   |   |   |   |   |   |   |   |   |   |   |   |   |   |   |   |   |   |   |   |   |   |   |   |   |   |   |   |   |   |   |   |   |   |   |   |   |   |   |   |   |   |   |   |   |   |   |   |   |   |   |   |   |   |   |   |   |   |   |   |   |   |   |   |   |   |   |   |   |   |   |   |   |   |   |   |   |   |   |   |   |   |   |   |   |   |   |   |   |   |   |   |   |   |   |   |   |   |   |   |   |   |   |   |   |   |   |   |   |   |   |   |   |   |   |   |   |   |   |   |   |   |   |   |   |   |   |   |   |   |   |   |   |   |   |   |   |   |   |   |   |   |   |   |   |   |   |   |   |   |   |   |   |   |   |   |   |   |   |   |   |   |   |   |   |   |   |   |   |   |   |   |   |   |   |   |   |   |   |   |   |   |   |   |   |   |   |   |   |   |   |   |   |   |   |   |   |   |   |   |   |   |   |   |   |   |   |   |   |   |   |   |   |   |   |   |   |   |   |   |   |   |   |   |   |   |   |   |   |   |   |   |   |   |   |   |   |   |   |   |   |   |   |   |   |   |   |   |   |   |   |   |   |   |   |   |   |   |   |   |   |   |   |   |   |   |   |   |   |   |   |   |   |   |   |   |   |   |   |   |   |   |   |   |   |   |   |   |   |   |   |   |   |   |   |   |   |   |   |   |   |   |   |   |   |   |   |   |   |   |   |   |   |   |   |   |   |   |   |   |   |   |   |   |   |   |   |   |   |   |   |   |   |   |   |   |   |   |   |   |   |   |   |   |   |   |   |   |   |   |   |   |   |   |   |   |   |   |   |   |   |   |   |   |   |   |   |   |   |   |   |   |   |   |   |   |   |   |   |   |   |   |   |   |   |   |   |   |   |   |   |   |   |   |   |   |   |   |   |   |   |   |   |   |   |   |   |   |   |   |   |   |   |   |   |   |   |   |   |   |   |   |   |   |   |   |   |   |   |   |   |   |   |   |   |
|                                | (17849) | 17849   | 17860 | 17870 | 17880 | 17890 | 17900 | 17910               | 17920  | 17930     | 17945 |             |     |        |         |               |      |     |         |        |      |       |     |      |      |       |   |         |      |      |     |      |    |      |   |     |   |   |   |   |   |   |   |   |   |   |   |   |   |   |   |   |   |   |   |   |   |   |   |   |   |   |   |   |   |   |   |   |   |   |   |   |   |   |   |   |   |   |   |   |   |   |   |   |   |   |   |   |   |   |   |   |   |   |   |   |   |   |   |   |   |   |   |   |   |   |   |   |   |   |   |   |   |   |   |   |   |   |   |   |   |   |   |   |   |   |   |   |   |   |   |   |   |   |   |   |   |   |   |   |   |   |   |   |   |   |   |   |   |   |   |   |   |   |   |   |   |   |   |   |   |   |   |   |   |   |   |   |   |   |   |   |   |   |   |   |   |   |   |   |   |   |   |   |   |   |   |   |   |   |   |   |   |   |   |   |   |   |   |   |   |   |   |   |   |   |   |   |   |   |   |   |   |   |   |   |   |   |   |   |   |   |   |   |   |   |   |   |   |   |   |   |   |   |   |   |   |   |   |   |   |   |   |   |   |   |   |   |   |   |   |   |   |   |   |   |   |   |   |   |   |   |   |   |   |   |   |   |   |   |   |   |   |   |   |   |   |   |   |   |   |   |   |   |   |   |   |   |   |   |   |   |   |   |   |   |   |   |   |   |   |   |   |   |   |   |   |   |   |   |   |   |   |   |   |   |   |   |   |   |   |   |   |   |   |   |   |   |   |   |   |   |   |   |   |   |   |   |   |   |   |   |   |   |   |   |   |   |   |   |   |   |   |   |   |   |   |   |   |   |   |   |   |   |   |   |   |   |   |   |   |   |   |   |   |   |   |   |   |   |   |   |   |   |   |   |   |   |   |   |   |   |   |   |   |   |   |   |   |   |   |   |   |   |   |   |   |   |   |   |   |   |   |   |   |   |   |   |   |   |   |   |   |   |   |   |   |   |   |   |   |   |   |   |   |   |   |   |   |   |   |   |   |   |   |   |   |   |   |   |   |   |   |   |   |   |   |   |   |   |   |   |   |   |   |   |   |   |   |   |   |   |   |   |   |   |   |   |   |   |   |   |   |   |   |   |   |   |   |   |   |   |   |   |   |   |   |   |   |   |   |   |   |   |   |   |   |   |   |   |   |   |   |   |   |   |   |   |   |   |   |   |   |   |   |   |   |   |   |   |   |   |   |   |   |   |   |   |   |   |   |   |   |   |   |   |   |   |   |   |   |   |   |   |   |   |   |   |   |   |   |   |   |   |   |   |   |   |   |   |   |   |   |   |   |   |   |   |   |   |   |   |   |   |   |   |   |   |   |   |   |   |   |   |   |   |   |   |   |   |   |   |   |   |   |   |   |   |   |   |   |   |   |   |   |   |   |   |   |   |   |   |   |   |   |   |   |   |   |   |   |   |   |   |   |   |   |   |   |   |   |   |   |   |   |   |   |   |   |   |   |   |   |   |   |   |   |   |   |   |   |   |   |   |   |   |   |   |   |   |   |   |   |   |   |   |   |   |   |   |   |   |   |   |   |   |   |   |   |   |   |   |   |   |   |   |   |   |   |   |   |   |   |   |   |   |   |   |   |   |   |   |   |   |   |   |   |   |   |   |   |   |   |   |   |   |   |   |   |   |   |   |   |   |   |   |   |   |   |   |   |   |   |   |   |   |   |   |   |   |   |   |   |   |   |   |   |   |   |   |   |   |   |   |   |   |   |   |   |   |   |   |   |   |   |   |   |   |   |   |   |   |   |   |   |   |   |   |   |   |   |   |   |   |   |   |   |   |   |   |   |   |   |   |   |   |   |   |   |   |   |   |   |   |   |   |   |   |   |   |   |   |   |   |   |   |   |   |   |   |   |   |   |   |   |   |   |   |   |   |   |   |   |   |   |   |   |   |   |   |   |   |   |   |   |   |   |   |   |   |   |   |   |   |   |   |   |   |   |   |   |   |   |   |   |   |   |   |   |   |   |   |   |   |   |   |   |   |   |   |   |   |   |   |   |   |   |   |   |   |   |   |   |   |   |   |   |   |   |   |   |   |   |   |   |   |   |   |   |   |   |   |   |   |   |   |   |   |   |   |   |   |   |   |   |   |   |   |   |   |   |   |   |   |   |   |   |   |   |   |   |   |   |   |   |   |   |   |   |   |   |   |   |   |   |   |   |   |   |   |   |   |   |   |   |   |   |   |   |   |   |   |   |   |   |   |   |   |   |   |   |   |   |   |   |   |   |   |   |   |   |   |   |   |   |   |   |   |   |   |   |   |   |   |   |   |   |   |   |   |   |   |   |   |   |   |   |   |   |   |   |   |   |   |   |   |   |   |   |   |   |   |   |   |   |   |   |   |   |   |   |   |   |   |   |   |   |   |   |   |   |   |   |   |   |   |   |   |   |   |   |   |   |   |   |   |   |   |   |   |   |   |   |   |   |   |   |   |   |   |   |   |   |   |   |   |   |   |   |   |   |   |   |   |   |   |   |   |   |   |   |   |   |   |   |   |   |   |   |   |   |   |   |   |   |   |   |   |   |   |   |   |   |   |   |   |   |   |   |   |   |   |   |   |   |   |   |   |   |   |   |   |   |   |   |   |   |   |   |   |   |   |   |
| lambda NC_001416.1 (17351)     | T       | C       | A     | C     | G     | C     | G     | C                   | A      | G         | C     | A           | G   | C      | A       | G             | C    | A   | G       | C      | A    | C     | T   | G    | A    | C     | G | C       | A    | G    | C   | A    | C  | T    | G | A   | C | A | G |   |   |   |   |   |   |   |   |   |   |   |   |   |   |   |   |   |   |   |   |   |   |   |   |   |   |   |   |   |   |   |   |   |   |   |   |   |   |   |   |   |   |   |   |   |   |   |   |   |   |   |   |   |   |   |   |   |   |   |   |   |   |   |   |   |   |   |   |   |   |   |   |   |   |   |   |   |   |   |   |   |   |   |   |   |   |   |   |   |   |   |   |   |   |   |   |   |   |   |   |   |   |   |   |   |   |   |   |   |   |   |   |   |   |   |   |   |   |   |   |   |   |   |   |   |   |   |   |   |   |   |   |   |   |   |   |   |   |   |   |   |   |   |   |   |   |   |   |   |   |   |   |   |   |   |   |   |   |   |   |   |   |   |   |   |   |   |   |   |   |   |   |   |   |   |   |   |   |   |   |   |   |   |   |   |   |   |   |   |   |   |   |   |   |   |   |   |   |   |   |   |   |   |   |   |   |   |   |   |   |   |   |   |   |   |   |   |   |   |   |   |   |   |   |   |   |   |   |   |   |   |   |   |   |   |   |   |   |   |   |   |   |   |   |   |   |   |   |   |   |   |   |   |   |   |   |   |   |   |   |   |   |   |   |   |   |   |   |   |   |   |   |   |   |   |   |   |   |   |   |   |   |   |   |   |   |   |   |   |   |   |   |   |   |   |   |   |   |   |   |   |   |   |   |   |   |   |   |   |   |   |   |   |   |   |   |   |   |   |   |   |   |   |   |   |   |   |   |   |   |   |   |   |   |   |   |   |   |   |   |   |   |   |   |   |   |   |   |   |   |   |   |   |   |   |   |   |   |   |   |   |   |   |   |   |   |   |   |   |   |   |   |   |   |   |   |   |   |   |   |   |   |   |   |   |   |   |   |   |   |   |   |   |   |   |   |   |   |   |   |   |   |   |   |   |   |   |   |   |   |   |   |   |   |   |   |   |   |   |   |   |   |   |   |   |   |   |   |   |   |   |   |   |   |   |   |   |   |   |   |   |   |   |   |   |   |   |   |   |   |   |   |   |   |   |   |   |   |   |   |   |   |   |   |   |   |   |   |   |   |   |   |   |   |   |   |   |   |   |   |   |   |   |   |   |   |   |   |   |   |   |   |   |   |   |   |   |   |   |   |   |   |   |   |   |   |   |   |   |   |   |   |   |   |   |   |   |   |   |   |   |   |   |   |   |   |   |   |   |   |   |   |   |   |   |   |   |   |   |   |   |   |   |   |   |   |   |   |   |   |   |   |   |   |   |   |   |   |   |   |   |   |   |   |   |   |   |   |   |   |   |   |   |   |   |   |   |   |   |   |   |   |   |   |   |   |   |   |   |   |   |   |   |   |   |   |   |   |   |   |   |   |   |   |   |   |   |   |   |   |   |   |   |   |   |   |   |   |   |   |   |   |   |   |   |   |   |   |   |   |   |   |   |   |   |   |   |   |   |   |   |   |   |   |   |   |   |   |   |   |   |   |   |   |   |   |   |   |   |   |   |   |   |   |   |   |   |   |   |   |   |   |   |   |   |   |   |   |   |   |   |   |   |   |   |   |   |   |   |   |   |   |   |   |   |   |   |   |   |   |   |   |   |   |   |   |   |   |   |   |   |   |   |   |   |   |   |   |   |   |   |   |   |   |   |   |   |   |   |   |   |   |   |   |   |   |   |   |   |   |   |   |   |   |   |   |   |   |   |   |   |   |   |   |   |   |   |   |   |   |   |   |   |   |   |   |   |   |   |   |   |   |   |   |   |   |   |   |   |   |   |   |   |   |   |   |   |   |   |   |   |   |   |   |   |   |   |   |   |   |   |   |   |   |   |   |   |   |   |   |   |   |   |   |   |   |   |   |   |   |   |   |   |   |   |   |   |   |   |   |   |   |   |   |   |   |   |   |   |   |   |   |   |   |   |   |   |   |   |   |   |   |   |   |   |   |   |   |   |   |   |   |   |   |   |   |   |   |   |   |   |   |   |   |   |   |   |   |   |   |   |   |   |   |   |   |   |   |   |   |   |   |   |   |   |   |   |   |   |   |   |   |   |   |   |   |   |   |   |   |   |   |   |   |   |   |   |   |   |   |   |   |   |   |   |   |   |   |   |   |   |   |   |   |   |   |   |   |   |   |   |   |   |   |   |   |   |   |   |   |   |   |   |   |   |   |   |   |   |   |   |   |   |   |   |   |   |   |   |   |   |   |   |   |   |   |   |   |   |   |   |   |   |   |   |   |   |   |   |   |   |   |   |   |   |   |   |   |   |   |   |   |   |   |   |   |   |   |   |   |   |   |   |   |   |   |   |   |   |   |   |   |   |   |   |   |   |   |   |   |   |   |   |   |   |   |   |   |   |   |   |   |   |   |   |   |   |   |   |   |   |   |   |   |   |   |   |   |   |   |   |   |   |   |   |   |   |   |   |   |   |   |   |   |   |   |   |   |   |   |   |   |   |   |   |   |   |   |   |   |   |   |   |   |   |   |   |   |   |   |   |   |   |   |   |   |   |   |   |   |   |   |   |   |   |   |   |   |   |   |   |   |   |   |
| SARS-CoV-2 NC_045512.2 (11664) | T       | C       | A     | C     | G     | -     | -     | CTA                 | CTT    | TAG       | A     | CTGA        | CT  | -      | -       | CTT           | -    | G   | T       | G      | T    | -     | T   | A    | T    | G     | A | T       | A    | CT   | TAG | TTT  | CT | A    | C | A   | C | A | G | A | G | T | T | A | G | A | T | A | G | A | T | A | G | A | T | A | G | A | T | A | G | A | T | A | G | A | T | A | G | A | T | A | G | A | T | A | G | A | T | A | G | A | T | A | G | A | T | A | G | A | T | A | G | A | T | A | G | A | T | A | G | A | T | A | G | A | T | A | G | A | T | A | G | A | T | A | G | A | T | A | G | A | T | A | G | A | T | A | G | A | T | A | G | A | T | A | G | A | T | A | G | A | T | A | G | A | T | A | G | A | T | A | G | A | T | A | G | A | T | A | G | A | T | A | G | A | T | A | G | A | T | A | G | A | T | A | G | A | T | A | G | A | T | A | G | A | T | A | G | A | T | A | G | A | T | A | G | A | T | A | G | A | T | A | G | A | T | A | G | A | T | A | G | A | T | A | G | A | T | A | G | A | T | A | G | A | T | A | G | A | T | A | G | A | T | A | G | A | T | A | G | A | T | A | G | A | T | A | G | A | T | A | G | A | T | A | G | A | T | A | G | A | T | A | G | A | T | A | G | A | T | A | G | A | T | A | G | A | T | A | G | A | T | A | G | A | T | A | G | A | T | A | G | A | T | A | G | A | T | A | G | A | T | A | G | A | T | A | G | A | T | A | G | A | T | A | G | A | T | A | G | A | T | A | G | A | T | A | G | A | T | A | G | A | T | A | G | A | T | A | G | A | T | A | G | A | T | A | G | A | T | A | G | A | T | A | G | A | T | A | G | A | T | A | G | A | T | A | G | A | T | A | G | A | T | A | G | A | T | A | G | A | T | A | G | A | T | A | G | A | T | A | G | A | T | A | G | A | T | A | G | A | T | A | G | A | T | A | G | A | T | A | G | A | T | A | G | A | T | A | G | A | T | A | G | A | T | A | G | A | T | A | G | A | T | A | G | A | T | A | G | A | T | A | G | A | T | A | G | A | T | A | G | A | T | A | G | A | T | A | G | A | T | A | G | A | T | A | G | A | T | A | G | A | T | A | G | A | T | A | G | A | T | A | G | A | T | A | G | A | T | A | G | A | T | A | G | A | T | A | G | A | T | A | G | A | T | A | G | A | T | A | G | A | T | A | G | A | T | A | G | A | T | A | G | A | T | A | G | A | T | A | G | A | T | A | G | A | T | A | G | A | T | A | G | A | T | A | G | A | T | A | G | A | T | A | G | A | T | A | G | A | T | A | G | A | T | A | G | A | T | A | G | A | T | A | G | A | T | A | G | A | T | A | G | A | T | A | G | A | T | A | G | A | T | A | G | A | T | A | G | A | T | A | G | A | T | A | G | A | T | A | G | A | T | A | G | A | T | A | G | A | T | A | G | A | T | A | G | A | T | A | G | A | T | A | G | A | T | A | G | A | T | A | G | A | T | A | G | A | T | A | G | A | T | A | G | A | T | A | G | A | T | A | G | A | T | A | G | A | T | A | G | A | T | A | G | A | T | A | G | A | T | A | G | A | T | A | G | A | T | A | G | A | T | A | G | A | T | A | G | A | T | A | G | A | T | A | G | A | T | A | G | A | T | A | G | A | T | A | G | A | T | A | G | A | T | A | G | A | T | A | G | A | T | A | G | A | T | A | G | A | T | A | G | A | T | A | G | A | T | A | G | A | T | A | G | A | T | A | G | A | T | A | G | A | T | A | G | A | T | A | G | A | T | A | G | A | T | A | G | A | T | A | G | A | T | A | G | A | T | A | G | A | T | A | G | A | T | A | G | A | T | A | G | A | T | A | G | A | T | A | G | A | T | A | G | A | T | A | G | A | T | A | G | A | T | A | G | A | T | A | G | A | T | A | G | A | T | A | G | A | T | A | G | A | T | A | G | A | T | A | G | A | T | A | G | A | T | A | G | A | T | A | G | A | T | A | G | A | T | A | G | A | T | A | G | A | T | A | G | A | T | A | G | A | T | A | G | A | T | A | G | A | T | A | G | A | T | A | G | A | T | A | G | A | T | A | G | A | T | A | G | A | T | A | G | A | T | A | G | A | T | A | G | A | T | A | G | A | T | A | G | A | T | A | G | A | T | A | G | A | T | A | G | A | T | A | G | A | T | A | G | A | T | A | G | A | T | A | G | A | T | A | G | A | T | A | G | A | T | A | G | A | T | A | G | A | T | A | G | A | T | A | G | A | T | A | G | A | T | A | G | A | T | A | G | A | T | A | G | A | T | A | G | A | T | A | G | A | T | A | G | A | T | A | G | A | T | A | G | A | T | A | G | A | T | A | G | A | T | A | G | A | T | A | G | A | T | A | G | A | T | A | G | A | T | A | G | A | T | A | G | A | T | A | G | A | T | A | G | A | T | A | G | A | T | A | G | A | T | A | G | A | T | A | G | A | T | A | G | A | T | A | G | A | T | A | G | A | T | A | G | A | T | A | G | A | T | A | G | A | T | A | G | A | T | A | G | A | T | A | G | A | T | A | G | A | T | A | G | A | T | A | G | A | T | A | G | A | T | A | G | A | T | A | G | A | T | A | G | A | T | A | G | A | T | A | G | A | T | A | G | A | T | A | G | A | T | A | G | A | T |

SARS-CoV-2 & lambda.apr

Genomic alignment of SARS-CoV-2 NC\_045512.2 with reference sequences, showing mutations highlighted in yellow and green. The alignment is divided into sections 190 through 196. Mutations are indicated by colored boxes: yellow for single nucleotide changes and green for insertions/deletions. The reference sequence is shown in blue and the sample sequence in black.

**Section 190**

(18334) 18334 18340 18350 18360 18370 18380 18390 18400 18410 18420 18430  
 lambda NC\_001416.1 (17814) GTAC TGGATAGCCG C CAGTATCAATATCAAACCGG G C ATGAT TATTACTTTT TATAT -- CCG CAGTGTGAAC ACCGTTGGCA AATC GGCAT T TCGT G-  
 SARS-CoV-2 NC\_045512.2 (12109) TAGT T C C C T T -- C CATCATATGCAGCTTT --- T G C T A C T G C T CAAGAAGC T TATGAG CAGGCTGT TGCTA A T -- GGT G A T T C T GAAG T T G T T C T

**Section 191**

(18431) 18431 18440 18450 18460 18470 18480 18490 18500 18510 18527  
 lambda NC\_001416.1 (17908) G A G G C C G T C G G T C G G C G C A T G A T G C G G A A G T T A C T G G A T T T T T C A A A G G C A A G A T A A C C G A A T C C C A T C T C G G C --- A A G C A G C T G C T G  
 SARS-CoV-2 NC\_045512.2 (12196) T A A A A A G T T G A A G A A G --- T C T T --- T G --- A A T G T G G C T A --- A A T C T G A A T T T G A C C G T --- G A T G C A G C C A T G C A A C G T A A G T T G G

**Section 192**

(18528) 18528 18540 18550 18560 18570 18580 18590 18600 18610 18624  
 lambda NC\_001416.1 (18001) G A A A A A G T C G A G C T G A C G G A G G A - T A A C G C C A G C A G A C T G G A G C A G T T T T C G A A A G A G T G G A A G G A T G C C A G T G A - T A A G T G G A A T G - - C C A T G T G G  
 SARS-CoV-2 NC\_045512.2 (12270) A A --- A A G A T G G C T - G A T C A A G C T A T G A C C A A T G T A T A A A C A G G C T A G A T C T G A G A C A A G A G G --- G C A A A A G T T A C T A G T G C T A T G C A G A C A A

**Section 193**

(18625) 18625 18630 18640 18650 18660 18670 18680 18690 18700 18710 18721  
 lambda NC\_001416.1 (18094) G C T G T C A A A A T T G A G C A G A C C A A A G A C --- G G C A A A C A T T A T G T C G C G G G T A T T G G C C T C A - G C A T G G A G G A C A C G G A G G A A G G C A A A C T G A G C A G  
 SARS-CoV-2 NC\_045512.2 (12360) T G C T T T T T C A - C T A T G C T T A G --- A A A G T T G G A T A A T G A T G C A C T C A A C A A --- C A T T A T C A A C A A T G C A A G A G A T G G T T G T G T T C C C - T T G A C A T A

**Section 194**

(18722) 18722 18730 18740 18750 18760 18770 18780 18790 18800 18818  
 lambda NC\_001416.1 (18187) T T T C T G G T T G C C G C C A A T C G T A T C G C A T T T A T T G A C C C G G C A A C G G G A A T G A A A C G C G A T G T T T G T G G C G C A G G G C A A C C A - G A T A T T C A T G A A C  
 SARS-CoV-2 NC\_045512.2 (12449) A T A C C T C T T T A - C A A C A G C A G C C A A A C T A A T G G T T --- G T C A T A C C A G A C T A T A A C A C A T A T A A A A A T A C G T G T G A T G G T A C A A C A T T T A C T T A T G C

**Section 195**

(18819) 18819 18830 18840 18850 18860 18870 18880 18890 18900 18915  
 lambda NC\_001416.1 (18283) G A C G T G T T C C T G A A G C G C C T G A C G G --- C C C C C A C C A T T A C C A G C G G C - G G C A A T C T C C G G C C T T T C C C T G A C A C C G G A C G G A A A G C T G A C C G  
 SARS-CoV-2 NC\_045512.2 (12541) A T C A G C A T - - T G T G G A A A T C C A A C A G G T T G T A G A T G C A G A T A G T A A A A T T G T T C A A C T T A G T G A A A T T - A G T A T G G A C - A A T T C A C C T A A T T T A G

**Section 196**

(18916) 18916 18930 18940 18950 18960 18970 18980 18990 19000 19012  
 lambda NC\_001416.1 (18374) C T A A A A A T G C G G A T A T C A G T G G C A G T G T G A A T G C G A A C T C C G G G A C G C T C A G T A A T G T G A C G A T A G C T G A A A A C T G T A C G A T A A A C G G T A C G C T G A G  
 SARS-CoV-2 NC\_045512.2 (12633) C - - A T G G C C T C T T A T T G - T A A C A G C T T T A A G G G C A A T T C T G C T G T C A A A T T A C A G A A T A A T G A G C T T A G T - C T G T T G C A C T A C G A C A G A T G T C T T

SARS-CoV-2 & lambda.apr

SARS-CoV-2 & lambda.apr

Figure 1 displays a multi-panel sequence alignment showing the evolution of SARS-CoV-2 NC\_045512.2 from 1969 to 2037. The figure is divided into seven sections (204 to 210) by horizontal lines. Each section displays a reference sequence (lambda NC\_001416.1) and a SARS-CoV-2 sequence (NC\_045512.2) with mutations highlighted in yellow. The sequences are color-coded by year: 1969 (blue), 1970 (green), 1971 (blue), 1972 (green), 1973 (blue), 1974 (green), 1975 (blue), 1976 (green), 1977 (blue), 1978 (green), 1979 (blue), 1980 (green), 1981 (blue), 1982 (green), 1983 (blue), 1984 (green), 1985 (blue), 1986 (green), 1987 (blue), 1988 (green), 1989 (blue), 1990 (green), 1991 (blue), 1992 (green), 1993 (blue), 1994 (green), 1995 (blue), 1996 (green), 1997 (blue), 1998 (green), 1999 (blue), 2000 (green), 2001 (blue), 2002 (green), 2003 (blue), 2004 (green), 2005 (blue), 2006 (green), 2007 (blue), 2008 (green), 2009 (blue), 2010 (green), 2011 (blue), 2012 (green), 2013 (blue), 2014 (green), 2015 (blue), 2016 (green), 2017 (blue), 2018 (green), 2019 (blue), 2020 (green), 2021 (blue), 2022 (green), 2023 (blue), 2024 (green), 2025 (blue), 2026 (green), 2027 (blue), 2028 (green), 2029 (blue), 2030 (green), 2031 (blue), 2032 (green), 2033 (blue), 2034 (green), 2035 (blue), 2036 (green), 2037 (blue). The SARS-CoV-2 sequence is shown in black text, with mutations highlighted in yellow. The reference sequence is shown in blue text. The sequences are aligned by year, with the year of the mutation indicated above the sequence.

## SARS-CoV-2 &amp; lambda.apr

|                                |         |       |        |              |           |          |          |             |           |            |            |        |        |         |        | Section 211 |        |           |           |         |          |           |               |        |               |         |            |         |      |      |        |        |           |       |       |   |
|--------------------------------|---------|-------|--------|--------------|-----------|----------|----------|-------------|-----------|------------|------------|--------|--------|---------|--------|-------------|--------|-----------|-----------|---------|----------|-----------|---------------|--------|---------------|---------|------------|---------|------|------|--------|--------|-----------|-------|-------|---|
|                                | (20371) | 20371 | 20380  | 20390        | 20400     | 20410    | 20420    | 20430       | 20440     | 20450      | 20467      |        |        |         |        |             |        |           |           |         |          |           |               |        |               |         |            |         |      |      |        |        |           |       |       |   |
| lambda NC_001416.1 (19733)     |         | T     | AAC    | AGCACCACGGTG | GT        | GGTGA    | ACA      | CGGTGG      | CTCAGAGAA | TCCGGAT    | GA-AGCCGGG | GC     | GT     | TACAGCA | -----  | TGGATGTGG   | AGTA   | -CGGTC    |           |         |          |           |               |        |               |         |            |         |      |      |        |        |           |       |       |   |
| SARS-CoV-2 NC_045512.2 (13968) |         | C     | AAC    | TTAGGTGAACGT | GT        | ACGCC    | AAG      | CTTT--      | GTAA      | AAACA      | GTACA      | AAT    | T-CT   | G       | TGATGC | CATGCGAA    | AT     | TGCTGGTAT | TG        | TTGGTGT | ACTGAC   | ATT       |               |        |               |         |            |         |      |      |        |        |           |       |       |   |
|                                |         |       |        |              |           |          |          |             |           |            |            |        |        |         |        | Section 212 |        |           |           |         |          |           |               |        |               |         |            |         |      |      |        |        |           |       |       |   |
|                                | (20468) | 20468 | 20480  | 20490        | 20500     | 20510    | 20520    | 20530       | 20540     | 20550      | 20564      |        |        |         |        |             |        |           |           |         |          |           |               |        |               |         |            |         |      |      |        |        |           |       |       |   |
| lambda NC_001416.1 (19819)     |         | AG    | TACAGT | TGTCATC      | C-TGCA    | GGT      | TGAC     | GGT         | TTTCC     | ACCATCGCAC | GCCGGGA    | C      | CAT--- | C---    | A      | CCGT        | GTA    | TGAAGA    | -TTC      | ---ACA  | A---     | CCGG      |               |        |               |         |            |         |      |      |        |        |           |       |       |   |
| SARS-CoV-2 NC_045512.2 (14062) |         | GA    | TAA--  | TCAAGAT      | CTCAAT    | GGT      | AACT     | GGT         | ATGAT     | -----      | TTCG       | TGATTT | C      | ATACAAA | C      | CACG        | CCAG   | GTA       | GTGGAGT   | TCT     | TGTTGT   | AGATTCTTA |               |        |               |         |            |         |      |      |        |        |           |       |       |   |
|                                |         |       |        |              |           |          |          |             |           |            |            |        |        |         |        | Section 213 |        |           |           |         |          |           |               |        |               |         |            |         |      |      |        |        |           |       |       |   |
|                                | (20565) | 20565 | 20570  | 20580        | 20590     | 20600    | 20610    | 20620       | 20630     | 20640      | 20650      | 20661  |        |         |        |             |        |           |           |         |          |           |               |        |               |         |            |         |      |      |        |        |           |       |       |   |
| lambda NC_001416.1 (19900)     |         | GG    | ACG    | CTGAA        | TGATTTT   | CTCTG    | TGCC     | ATGACGGAGGA | TGA       | TGCC       | GCCGG      | A      | GGT    | GCT     | G      | CTC         | G--    | TCTTGA    | ACTGATGGT | -GG     | AA       | GAGGT     | TGGCGCG       |        |               |         |            |         |      |      |        |        |           |       |       |   |
| SARS-CoV-2 NC_045512.2 (14151) |         | TT    | ATT    | CATTG        | TAA       | TGC      | CTA--    | TATT        | AACCT     | -----      | TGA        | CCAGG  | G      | CTTTA   | A      | CTGCA       | -G     | ATCACA    | TG        | TTGA    | CACTGACT | TAA       | AAAGCCTTACATT |        |               |         |            |         |      |      |        |        |           |       |       |   |
|                                |         |       |        |              |           |          |          |             |           |            |            |        |        |         |        | Section 214 |        |           |           |         |          |           |               |        |               |         |            |         |      |      |        |        |           |       |       |   |
|                                | (20662) | 20662 | 20670  | 20680        | 20690     | 20700    | 20710    | 20720       | 20730     | 20740      | 20758      |        |        |         |        |             |        |           |           |         |          |           |               |        |               |         |            |         |      |      |        |        |           |       |       |   |
| lambda NC_001416.1 (19994)     |         | T     | AAC    | GC           | GTC-C     | GTGGTGGC | A        | CAGAGT      | -ACGG     | CAGA       | CGC        | G      | AAG    | AAA     | TCAGCC | GG          | GAT    | TGCCAG    | TGC       | ATCAGC  | TG       | CTCAGGT   | CGCGG         | CC     | CTTGTG        | ACTG    |            |         |      |      |        |        |           |       |       |   |
| SARS-CoV-2 NC_045512.2 (14239) |         | A     | AGT    | GG           | GATTT     | GT       | TAA      | AAT         | ATGACT    | TC         | ACGG       | A      | AGAG   | G       | TTA    | AAA         | CTCTTT | G         | ACG       | T       | TATTT    | T--       | AAATAT        | TG     | GGATCAGACATA  | CC      | ACCCAAATTG |         |      |      |        |        |           |       |       |   |
|                                |         |       |        |              |           |          |          |             |           |            |            |        |        |         |        | Section 215 |        |           |           |         |          |           |               |        |               |         |            |         |      |      |        |        |           |       |       |   |
|                                | (20759) | 20759 | 20770  | 20780        | 20790     | 20800    | 20810    | 20820       | 20830     | 20840      | 20855      |        |        |         |        |             |        |           |           |         |          |           |               |        |               |         |            |         |      |      |        |        |           |       |       |   |
| lambda NC_001416.1 (20089)     |         | ATGC  | AACTG  | AC           | T         | CAGCACGC | G        | CC          | GC        | CAG        | CACGT      | CGCCG  | GAC    | AGGCT   | TGC    | ATCGT       | CAGC   | TC        | AGGA      | AGC     | GTCC     | TCC       | GGCG          | G----- | CAGAAG        | CGGGCAT | C          |         |      |      |        |        |           |       |       |   |
| SARS-CoV-2 NC_045512.2 (14334) |         | TGTT  | AACTG  | TTT          | TGGATGACA | GAT      | GC       | ATT         | CT--      | G          | ATTGT      | GCA    | AACT   | T       | TAAT   | GT          | TTAT   | TC        | TCT       | ACA     | -GT      | GT        | TCC           | CA     | CCTACAAGTTTTG | G       | ACCAC      | TA      |      |      |        |        |           |       |       |   |
|                                |         |       |        |              |           |          |          |             |           |            |            |        |        |         |        | Section 216 |        |           |           |         |          |           |               |        |               |         |            |         |      |      |        |        |           |       |       |   |
|                                | (20856) | 20856 | 20870  | 20880        | 20890     | 20900    | 20910    | 20920       | 20930     | 20940      | 20952      |        |        |         |        |             |        |           |           |         |          |           |               |        |               |         |            |         |      |      |        |        |           |       |       |   |
| lambda NC_001416.1 (20180)     |         | A-    | GCA    | AA           | GGCC      | A        | CTGAAGCG | G           | AAAA      | AA         | GTG        | CCG    | CA     | GCCGCA  | G      | AGTCC       | T      | CAA       | AA        | AAC     | G        | CGG       | CGG           | CA     | C             | CAGTGC  | CGGT       | G       | CGGC | G    | AA     | ACGT   | -CAGAA    | A     |       |   |
| SARS-CoV-2 NC_045512.2 (14428) |         | GT    | GAG    | AAAAAT       | A         | T-----   | TT       | G           | TG        | A          | TG         | GTG    | TTC    | CA      | ---    | TTT         | G      | TAG       | --        | TTTC    | AA       | CTG       | G             | ATA    | C             | CA      | CTT        | CAGAGAG | CTAG | G    | TG     | TTGT   | A         | ATAAT | CAGGA | T |
|                                |         |       |        |              |           |          |          |             |           |            |            |        |        |         |        | Section 217 |        |           |           |         |          |           |               |        |               |         |            |         |      |      |        |        |           |       |       |   |
|                                | (20953) | 20953 | 20960  | 20970        | 20980     | 20990    | 21000    | 21010       | 21020     | 21030      | 21049      |        |        |         |        |             |        |           |           |         |          |           |               |        |               |         |            |         |      |      |        |        |           |       |       |   |
| lambda NC_001416.1 (20275)     |         | CG    | AA     | TGCT         | TG        | CAGCG    | T        | CA          | CA        | AC         | AAT        | C      | AGCCG  | CC      | CAGT   | CT          | G      | CCTCC     | A         | CCGCG   | CC       | CAGAAAGCG | T             | CA     | G             | AGG     | CGCG       | C       | ACT  | T    | CAGCAC | G      | AGATGCGGT | G     | GC    |   |
| SARS-CoV-2 NC_045512.2 (14515) |         | GT    | AA     | ACT          | TAC       | ---A     | TAG      | CTCT        | AG        | ACT--      | TAGT       | -TT    | T      | AAG     | GAATTA | --          | CTT    | G         | TGTAT     | -G      | TGCT     | T--       | G             | ACC    | T             | -G      | CTAT       | TG      | CA   | CGCT | G      | CTTCTG | ---       | GTA   |       |   |

## SARS-CoV-2 &amp; lambda.apr

|                                |         |       |       |       |       |       |       |       |       | Section 218 |
|--------------------------------|---------|-------|-------|-------|-------|-------|-------|-------|-------|-------------|
|                                |         |       |       |       |       |       |       |       |       | 21146       |
| lambda NC_001416.1 (20372)     | (21050) | 21050 | 21060 | 21070 | 21080 | 21090 | 21100 | 21110 | 21120 | 21130       |
| SARS-CoV-2 NC_045512.2 (14597) |         |       |       |       |       |       |       |       |       |             |
|                                |         |       |       |       |       |       |       |       |       | Section 219 |
| lambda NC_001416.1 (20459)     | (21147) | 21147 | 21160 | 21170 | 21180 | 21190 | 21200 | 21210 | 21220 | 21230       |
| SARS-CoV-2 NC_045512.2 (14682) |         |       |       |       |       |       |       |       |       | 21243       |
|                                |         |       |       |       |       |       |       |       |       | Section 220 |
| lambda NC_001416.1 (20556)     | (21244) | 21244 | 21250 | 21260 | 21270 | 21280 | 21290 | 21300 | 21310 | 21320       |
| SARS-CoV-2 NC_045512.2 (14750) |         |       |       |       |       |       |       |       |       | 21330       |
|                                |         |       |       |       |       |       |       |       |       | Section 221 |
| lambda NC_001416.1 (20653)     | (21341) | 21341 | 21350 | 21360 | 21370 | 21380 | 21390 | 21400 | 21410 | 21420       |
| SARS-CoV-2 NC_045512.2 (14833) |         |       |       |       |       |       |       |       |       | 21437       |
|                                |         |       |       |       |       |       |       |       |       | Section 222 |
| lambda NC_001416.1 (20750)     | (21438) | 21438 | 21450 | 21460 | 21470 | 21480 | 21490 | 21500 | 21510 | 21520       |
| SARS-CoV-2 NC_045512.2 (14921) |         |       |       |       |       |       |       |       |       | 21534       |
|                                |         |       |       |       |       |       |       |       |       | Section 223 |
| lambda NC_001416.1 (20844)     | (21535) | 21535 | 21540 | 21550 | 21560 | 21570 | 21580 | 21590 | 21600 | 21610       |
| SARS-CoV-2 NC_045512.2 (15002) |         |       |       |       |       |       |       |       |       | 21620       |
|                                |         |       |       |       |       |       |       |       |       | Section 224 |
| lambda NC_001416.1 (20940)     | (21632) | 21632 | 21640 | 21650 | 21660 | 21670 | 21680 | 21690 | 21700 | 21710       |
| SARS-CoV-2 NC_045512.2 (15074) |         |       |       |       |       |       |       |       |       | 21728       |



## SARS-CoV-2 &amp; lambda.apr

| Section 225                    |         |              |               |               |                |            |               |           |              |            |              |                |           |           |         |            |          |              |         |          |     |       |     |    |      |      |
|--------------------------------|---------|--------------|---------------|---------------|----------------|------------|---------------|-----------|--------------|------------|--------------|----------------|-----------|-----------|---------|------------|----------|--------------|---------|----------|-----|-------|-----|----|------|------|
|                                | (21729) | 21729        | 21740         | 21750         | 21760          | 21770      | 21780         | 21790     | 21800        | 21810      | 21825        |                |           |           |         |            |          |              |         |          |     |       |     |    |      |      |
| lambda NC_001416.1 (21037)     |         | CGCGC        | TTGCGGGTAAAC  | AAACGAAGAAT   | GGG---ACACT    | GACGGCGCTG | GCAAGGGCTTTCC | ACGGC     | GAAAATAAAT   | TACCGTAT   | TTTGC        | GGAAAA         |           |           |         |            |          |              |         |          |     |       |     |    |      |      |
| SARS-CoV-2 NC_045512.2 (15159) |         | AAAA-TTATT   | -----GA       | AAATCAATAGCC  | GC             | CACTAGAG   | -GAGCTAC      | --TGT     | -----GT      | AATTG      | GAAAGCAAA    | TTCTATGGTGGT   | GGCAACA   |           |         |            |          |              |         |          |     |       |     |    |      |      |
| Section 226                    |         |              |               |               |                |            |               |           |              |            |              |                |           |           |         |            |          |              |         |          |     |       |     |    |      |      |
|                                | (21826) | 21826        | 21840         | 21850         | 21860          | 21870      | 21880         | 21890     | 21900        | 21910      | 21922        |                |           |           |         |            |          |              |         |          |     |       |     |    |      |      |
| lambda NC_001416.1 (21131)     |         | GATGCCGCC    | AGCCTGAC      | TGAAC         | TGACTC         | AGGTTGG    | CAGGGA        | TATTTCTGG | CAAAAAATTCCG | TTGCAGATGT | --TCTTGA     | ATACCTTGGG     | GCCGGTG   |           |         |            |          |              |         |          |     |       |     |    |      |      |
| SARS-CoV-2 NC_045512.2 (15240) |         | CATGTTAAAA   | AAC           | TGTT-TAT      | AGTGA          | TGTAG      | AAAAAC        | CTC-ACCT  | TATGG        | GT-----TG  | GATTATCCTAAA | TGTGATAGAGCCAT | GCCTAAC   |           |         |            |          |              |         |          |     |       |     |    |      |      |
| Section 227                    |         |              |               |               |                |            |               |           |              |            |              |                |           |           |         |            |          |              |         |          |     |       |     |    |      |      |
|                                | (21923) | 21923        | 21930         | 21940         | 21950          | 21960      | 21970         | 21980     | 21990        | 22000      | 22019        |                |           |           |         |            |          |              |         |          |     |       |     |    |      |      |
| lambda NC_001416.1 (21225)     |         | AGAATTCGGCCT | TTCCGGC       | AGGTG         | CGCCGATCCCG    | TGGCAT     | CAGATAT       | CGT       | TCCGT        | CT-GGCTAC  | GTCCTG       | ATGCAGGGG      | CAGGCGT   | TTGAC     | AAAT    |            |          |              |         |          |     |       |     |    |      |      |
| SARS-CoV-2 NC_045512.2 (15325) |         | AT--GCTTAGAA | TTAT          | GGCCT-CA      | CTTGTCTTGCT    | TCGCA      | AAACATA       | CAACGT    | GTTGT        | --A--GCTT  | GTC---       | ACACCGTTTT     | CTATAGA   | TTAGCT    | AAT     |            |          |              |         |          |     |       |     |    |      |      |
| Section 228                    |         |              |               |               |                |            |               |           |              |            |              |                |           |           |         |            |          |              |         |          |     |       |     |    |      |      |
|                                | (22020) | 22020        | 22030         | 22040         | 22050          | 22060      | 22070         | 22080     | 22090        | 22100      | 22116        |                |           |           |         |            |          |              |         |          |     |       |     |    |      |      |
| lambda NC_001416.1 (21321)     |         | CAGCC        | TA-----CCCAAA | ACTTGCTGTCG   | GTAT           | CCAT       | CGGGT         | GTG       | CTTCC        | TGATAT     | TGCGAGGCT    | -GGACAA        | TCAAGG    | GGAAACC   | CGC     | CAGCG      | GTCTG    |              |         |          |     |       |     |    |      |      |
| SARS-CoV-2 NC_045512.2 (15412) |         | GAGTG        | TGCTCAAGTATTG | AGT           | GAAATGGT       | CATGT      | TGTGG         | CG---     | GT           | CTACTAT    | TATGT        | TAAACCAGGT     | GGACC     | TCA       | TCAGGAG | ATG        | CCA      | CAACT        | GCTT    |          |     |       |     |    |      |      |
| Section 229                    |         |              |               |               |                |            |               |           |              |            |              |                |           |           |         |            |          |              |         |          |     |       |     |    |      |      |
|                                | (22117) | 22117        | 22130         | 22140         | 22150          | 22160      | 22170         | 22180     | 22190        | 22200      | 22213        |                |           |           |         |            |          |              |         |          |     |       |     |    |      |      |
| lambda NC_001416.1 (21412)     |         | --TGC---     | GTATT         | GCTCAGGAACAGG | ATGGAAT        | TAA        | GTCGCA        | CA        | CCCACAGTGC   | CAGT       | TGCATC       | CGGTACG        | GATTTGGGG | ACG       | AAAA    | CCACATC    | GT       |              |         |          |     |       |     |    |      |      |
| SARS-CoV-2 NC_045512.2 (15506) |         | ATGCTAATA    | GTGTTT        | TTAACATTTGTCA | AGCTG--        | T          | CACG--GC      | CA        | ATGTT-AATG   | CAC        | TTTTAT       | CTAC--T        | GAT       | GGTAAC    | AAA     | ATTG       | CCGATAAG | GT           |         |          |     |       |     |    |      |      |
| Section 230                    |         |              |               |               |                |            |               |           |              |            |              |                |           |           |         |            |          |              |         |          |     |       |     |    |      |      |
|                                | (22214) | 22214        | 22220         | 22230         | 22240          | 22250      | 22260         | 22270     | 22280        | 22290      | 22300        | 22310          |           |           |         |            |          |              |         |          |     |       |     |    |      |      |
| lambda NC_001416.1 (21504)     |         | CGTTTG--     | ATT---        | ACGGG         | ACGAAAAACAACAG | G          | CAG--T        | TCGAT     | TA           | CG         | CACCAA       | ATCG           | ACGAA     | TAAACACGG | GG      | GCTCATGCTC | CAGT     | TCT          | GAGC    |          |     |       |     |    |      |      |
| SARS-CoV-2 NC_045512.2 (15596) |         | ATG          | TCCGC         | AA            | TTTAC          | AACAC      | AGACTTTATGAGT | G         | TCTCTAT      | TAGAA      | ATA          | GAG            | ATGTTG    | ACAC      | AGACT   | TTGTGAAT   | GAGT     | TTTACGCATATT | TGC     | GTAA     |     |       |     |    |      |      |
| Section 231                    |         |              |               |               |                |            |               |           |              |            |              |                |           |           |         |            |          |              |         |          |     |       |     |    |      |      |
|                                | (22311) | 22311        | 22320         | 22330         | 22340          | 22350      | 22360         | 22370     | 22380        | 22390      | 22407        |                |           |           |         |            |          |              |         |          |     |       |     |    |      |      |
| lambda NC_001416.1 (21593)     |         | --GG         | TTCAAC        | AG            | GGGCCGCGGG     | T          | GCTCATGCC     | C         | ACACAA       | GTG        | GTT          | TAA            | GG--      | ATGA      | ACAGT   | TCT        | GGCT     | G            | GAG-TCA | G        | TAT | GGAAC | AGC | AA | CCAT | TTAC |
| SARS-CoV-2 NC_045512.2 (15693) |         | ACAT         | TTCTCA        | AT            | GATGATACT      | C          | TGACGATG      | C         | TGTTGT       | GTG        | TTT          | CAATAGC        | ACTT      | ATGCA     | TCT     | CAAG       | G        | TCTAGTG      | G       | CTAGCATA | AAG | AA--  | CTT | TA |      |      |

SARS-CoV-2 & lambda.apr

[illegible]

## SARS-CoV-2 &amp; lambda.apr

| Section 239                    |         |       |           |               |                |         |                   |             |             |                                               |                                                 |                                                    |
|--------------------------------|---------|-------|-----------|---------------|----------------|---------|-------------------|-------------|-------------|-----------------------------------------------|-------------------------------------------------|----------------------------------------------------|
|                                | (23087) | 23087 | 23100     | 23110         | 23120          | 23130   | 23140             | 23150       | 23160       | 23170 23183                                   |                                                 |                                                    |
| lambda NC_001416.1 (22335)     |         | AAAAC | TGT-TC    | CGGATCC       | GGGAGGCGG      | AAGAAAC | AAAAAGCC          | TGATGCAGG   | TAGCC--     | AGTGAGCATATTGCGCCGCTTCAGGATGCTGCAGAT          |                                                 |                                                    |
| SARS-CoV-2 NC_045512.2 (16396) |         | GGTTG | TGATGT    | CACAGAT       | GT-GACTCA      | ACTTTAC | TTAG--G-AGG       | TATGAGCTA   | TATTGTAA--  | ATCACATA--AACCAACCATTAGTTTTCAT                |                                                 |                                                    |
| Section 240                    |         |       |           |               |                |         |                   |             |             |                                               |                                                 |                                                    |
|                                | (23184) | 23184 | 23190     | 23200         | 23210          | 23220   | 23230             | 23240       | 23250       | 23260 23270 23280                             |                                                 |                                                    |
| lambda NC_001416.1 (22429)     |         | --CT  | TGGA      | AAT           | T--GC          | AACGAAG | GAAGAAACCTCGTTGCT | TGGAAGCC    | TGGAAGA     | AGTATCGGGTGTGTGATACATC---AACTGCA              |                                                 |                                                    |
| SARS-CoV-2 NC_045512.2 (16485) |         | GTG   | TGCT      | AAT           | TGGACA         | AGTTTTT | GGT--TTATATAAAAA  | TACATGTGT   | TGGT--      | AGCGATAA-TGTTACTGAC-TTTAAATGCAATTG-CAACATGTGA |                                                 |                                                    |
| Section 241                    |         |       |           |               |                |         |                   |             |             |                                               |                                                 |                                                    |
|                                | (23281) | 23281 | 23290     | 23300         | 23310          | 23320   | 23330             | 23340       | 23350       | 23360 23377                                   |                                                 |                                                    |
| lambda NC_001416.1 (22519)     |         | CCT   | GAT       | ATTGAG        | TGGCCTGCTGTCCC | TGT-TAT | TGGAGTAA          | TCGTTTGTGAT | TATGCC      | CGCAGAAACGTTGTATGAAATAACGTTCTGCGGTTAGTTA      |                                                 |                                                    |
| SARS-CoV-2 NC_045512.2 (16575) |         | CTG   | GACA      | AATGC         | TGGTGATTACATTT | TAGCTA  | ACACCTG-TACT      | GAAAGACTCA  | AGCTTTTTTGC | AGCAGAAACGCTCAAAGCTACTGAGGAGACAT              |                                                 |                                                    |
| Section 242                    |         |       |           |               |                |         |                   |             |             |                                               |                                                 |                                                    |
|                                | (23378) | 23378 | 23390     | 23400         | 23410          | 23420   | 23430             | 23440       | 23450       | 23460 23474                                   |                                                 |                                                    |
| lambda NC_001416.1 (22614)     |         | GT    | ATAT      | TGTAA         | AGCTGAG        | TATTG   | GTTTAT            | TGTGGCGAT   | TATTAT      | CTTCAGGAG-AAT                                 | AATGGAGTTCATGACTCAATTGTTCATAGTGTTTACATC         |                                                    |
| SARS-CoV-2 NC_045512.2 (16671) |         | TAA   | AC        | TGTCTT        | ATGGT          | ATT---- | GCTACT            | TGTACG--    | TGAAGT      | CTGTCTGACAGAG                                 | AATTACATCTTTTCATGGGAAGTTGGTAACCTAGAC-----       |                                                    |
| Section 243                    |         |       |           |               |                |         |                   |             |             |                                               |                                                 |                                                    |
|                                | (23475) | 23475 | 23480     | 23490         | 23500          | 23510   | 23520             | 23530       | 23540       | 23550 23560 23571                             |                                                 |                                                    |
| lambda NC_001416.1 (22710)     |         | AC    | CGC       | CA--          | ATTG           | CTTTTA  | AGACTG-----       | AACG        | CATGAAA-    | TATGGTTTT                                     | TCGTCATGTTTTGAGTCTCTGCTGTTGATATTTCTAAAGTCGGT    |                                                    |
| SARS-CoV-2 NC_045512.2 (16757) |         | CAC   | CA        | CTTA          | ACC            | GA---A  | TTAT              | TGTCTTTACTG | GTAT        | CTGTGTAAC                                     | TAAAAACAGTAAAGTACAAATAGGA--GA-G--TACA---CT----- |                                                    |
| Section 244                    |         |       |           |               |                |         |                   |             |             |                                               |                                                 |                                                    |
|                                | (23572) | 23572 | 23580     | 23590         | 23600          | 23610   | 23620             | 23630       | 23640       | 23650 23668                                   |                                                 |                                                    |
| lambda NC_001416.1 (22795)     |         | TT    | TTTTTCTTC | GTTT          | TCTCTA         | ACTATTT | CCATG             | AAATCAT     | TTTTG       | ATTATTATTTG                                   | AATCAATT-CCAAATACCTGAAGTCTTTCATCTATAATT         |                                                    |
| SARS-CoV-2 NC_045512.2 (16835) |         | TT    | GAAAAAGGT | GAC-TA        | TGGTGA         | TGCTGT  | TGT               | TACCG       | AGGT---     | ACAACA                                        | ACTTACA                                         | AATTAATTTGTTGGTGAATTATTTTGTGCTG-ACATCACAT          |
| Section 245                    |         |       |           |               |                |         |                   |             |             |                                               |                                                 |                                                    |
|                                | (23669) | 23669 | 23680     | 23690         | 23700          | 23710   | 23720             | 23730       | 23740       | 23750 23765                                   |                                                 |                                                    |
| lambda NC_001416.1 (22891)     |         | GGCA  | TGT       | TATGTATTGGTTT | ATTGG          | AGTAG   | TGCTTG            | CTTTT       | CTGAG       | CCATAGCTCT                                    | GATATCCA                                        | AATGAAGCCATAGGCATTTGTTATTTGGCTC                    |
| SARS-CoV-2 NC_045512.2 (16927) |         | ACAG  | TAA       | TGC-----      | C              | ATT     | A-AGT             | GCA         | C-----      | CT                                            | ACACTA                                          | GTGCCACAAGAGCAC---TATGTTAGAATT---ACTGGCTTATACCCAAC |

## SARS-CoV-2 &amp; lambda.apr

|                                |         |       |       |       |       |       |       |       |       |       |        |             |      |        |      |       |      |       |       |      |       |      |      |       |      |       |      |      |       |      |      |       |      |      |         |      |
|--------------------------------|---------|-------|-------|-------|-------|-------|-------|-------|-------|-------|--------|-------------|------|--------|------|-------|------|-------|-------|------|-------|------|------|-------|------|-------|------|------|-------|------|------|-------|------|------|---------|------|
|                                |         |       |       |       |       |       |       |       |       |       |        | Section 246 |      |        |      |       |      |       |       |      |       |      |      |       |      |       |      |      |       |      |      |       |      |      |         |      |
|                                | (23766) | 23766 | 23780 | 23790 | 23800 | 23810 | 23820 | 23830 | 23840 | 23850 | 23862  |             |      |        |      |       |      |       |       |      |       |      |      |       |      |       |      |      |       |      |      |       |      |      |         |      |
| lambda NC_001416.1 (22988)     |         | TG    | TCA   | GCTG  | CAT   | AAC   | G-CCA | AAAA  | TAT   | TTT   | ATCT   | GCTT        | GAT  | CT     | TCAA | ATGTT | GTA  | TTAA  | ATCA  | ATTG | AT--- | GGA  | ATTG | TTT   | ATC  | ATA   | AA   |      |       |      |      |       |      |      |         |      |
| SARS-CoV-2 NC_045512.2 (17001) |         | AC    | TCA   | ATAT  | CTCA  | --    | GATG  | -A    | GTTT  | CTA   | GCA    | AT          | GT   | TGCA   | AA   | TA    | TCAA | ----- | AAG   | GT   | TGGT  | AT   | GC   | AA--  | AAG  | TATT  | CT   | ACAC | TCC-- | AGGG | A    |       |      |      |         |      |
|                                |         |       |       |       |       |       |       |       |       |       |        | Section 247 |      |        |      |       |      |       |       |      |       |      |      |       |      |       |      |      |       |      |      |       |      |      |         |      |
|                                | (23863) | 23863 | 23870 | 23880 | 23890 | 23900 | 23910 | 23920 | 23930 | 23940 | 23959  |             |      |        |      |       |      |       |       |      |       |      |      |       |      |       |      |      |       |      |      |       |      |      |         |      |
| lambda NC_001416.1 (23081)     |         | AA    | AT    | TAA   | TGT   | TT    | GAA   | TGT   | GAT   | A     | ACCGT  | CCT         | TT   | AAAA   | AG   | TCG   | TT   | CT    | GCA   | AG   | CTT   | GGCT | GTA  | TAG   | TC   | -AACT | AA   | ---  | TCT   | TCT  | GTC  | GAA   | GT   | GATA |         |      |
| SARS-CoV-2 NC_045512.2 (17084) |         | C     | ACC   | TGG   | TAC   | TGG   | TAA   | GAG   | TCA   | TTTT  | TG     | CA          | TT   | GGCCT  | AG   | CTC   | TCT  | ACTA  | -CC   | CTT  | CTGCT | CG   | -CA  | TAGT  | GTA  | TAC   | AGCT | TGC  | TCT   | CAT  | GCC  | G     | -TGT |      |         |      |
|                                |         |       |       |       |       |       |       |       |       |       |        | Section 248 |      |        |      |       |      |       |       |      |       |      |      |       |      |       |      |      |       |      |      |       |      |      |         |      |
|                                | (23960) | 23960 | 23970 | 23980 | 23990 | 24000 | 24010 | 24020 | 24030 | 24040 | 24056  |             |      |        |      |       |      |       |       |      |       |      |      |       |      |       |      |      |       |      |      |       |      |      |         |      |
| lambda NC_001416.1 (23173)     |         | TTT   | TTAGG | CT    | TAT   | CT    | ACCA  | GTT   | TTAG  | AC    | GC     | TCT         | TT   | TAA    | TAT  | CT    | TC   | AG--- | GAA   | T    | TATT  | TTAT | T--  | GT    | CA   | TAT   | TG   | TAT  | CA    | TGCT | AAA  | TG--- | ACA  | AAT  | TT      |      |
| SARS-CoV-2 NC_045512.2 (17178) |         | TGA   | TGCA  | CTA   | TG    | TGAGA | AG    | GCA   | TTAA  | AA    | TAT    | -TT         | GCC  | TAT    | AGAT | AA    | TGT  | AG    | TAGAA | TTAT | ACCT  | G    | CA   | CG    | TGC  | TCGT  | G    | TAG  | AGT   | G    | TTTT | TG    | AT   | AA   | TT      |      |
|                                |         |       |       |       |       |       |       |       |       |       |        | Section 249 |      |        |      |       |      |       |       |      |       |      |      |       |      |       |      |      |       |      |      |       |      |      |         |      |
|                                | (24057) | 24057 | 24070 | 24080 | 24090 | 24100 | 24110 | 24120 | 24130 | 24140 | 24153  |             |      |        |      |       |      |       |       |      |       |      |      |       |      |       |      |      |       |      |      |       |      |      |         |      |
| lambda NC_001416.1 (23262)     |         | GCT   | TAT   | TGG   | AGT   | TAA   | TCT   | TTT   | TA    | -ATTT | TA     | -AA         | TAG  | TT     | AT   | CT    | CCT  | GGC   | TT    | CAT  | CAAA  | TAA  | AGAG | TC    | GA   | AT    | GAT  | GTT  | GGC   | -GAA | AT   | CA    | CAT  | CTG  | TAC     | CCC  |
| SARS-CoV-2 NC_045512.2 (17274) |         | CAA   | AG    | TGA   | AT    | TCA   | CA    | TT    | AGAA  | CAG   | TA     | -GT         | CTT  | TT     | GT   | ACT   | GTAA | -AT   | G     | CAT  | TGCC  | TGA  | GAC  | ---   | GAC  | AG    | CA   | ---  | GAT   | AT   | AGT  | TGT   | CT   | TT   | GAT     | GAA- |
|                                |         |       |       |       |       |       |       |       |       |       |        | Section 250 |      |        |      |       |      |       |       |      |       |      |      |       |      |       |      |      |       |      |      |       |      |      |         |      |
|                                | (24154) | 24154 | 24160 | 24170 | 24180 | 24190 | 24200 | 24210 | 24220 | 24230 | 24240  | 24250       |      |        |      |       |      |       |       |      |       |      |      |       |      |       |      |      |       |      |      |       |      |      |         |      |
| lambda NC_001416.1 (23356)     |         | ATT   | GG    | AT    | TG    | TTT   | ATT   | TG    | TAT   | GCCA  | AGAG   | AGT         | TACA | G      | CAGT | TA--- | TAC  | ATT   | TGC   | CA   | TAG   | AT   | TAT  | AGC   | TA   | AGGC  | AT   | GTA  | ATA   | ATTC | GTA  | ATC   | TT   | TTA  |         |      |
| SARS-CoV-2 NC_045512.2 (17362) |         | ATT   | TC    | AA    | TG    | GCC   | ACAAA | T     | TAT   | GAT   | --     | TTGAG       | T    | GTT    | G    | TCAA  | TGCC | AG    | ATT   | ACG  | TGC   | TA   | AGC  | AC    | TAT  | GTG   | TA   | CA   | -TTG  | GCG  | AC-- | CCT   | G    | CTCA | TT      | ACC  |
|                                |         |       |       |       |       |       |       |       |       |       |        | Section 251 |      |        |      |       |      |       |       |      |       |      |      |       |      |       |      |      |       |      |      |       |      |      |         |      |
|                                | (24251) | 24251 | 24260 | 24270 | 24280 | 24290 | 24300 | 24310 | 24320 | 24330 | 24347  |             |      |        |      |       |      |       |       |      |       |      |      |       |      |       |      |      |       |      |      |       |      |      |         |      |
| lambda NC_001416.1 (23450)     |         | GCG   | TATTA | GC    | GACC  | CAT   | C     | GTCT  | TT    | CT    | GAT    | -TTA        | ATA  | ATAG   | ATGA | TT    | CAG  | TTAA  | AT    | AT   | GAAG  | GT   | AA   | TT    | CT   | TTTT  | TG   | CAAG | TC    | TG   | ACT  | AA    | CTT  | TT   | TTA     |      |
| SARS-CoV-2 NC_045512.2 (17454) |         | TGC   | ACCAC | GC    | ---   | A     | CAT   | T     | GC-   | TAA   | CTA    | AGGG        | CA   | CTAGAA | CC   | AGA   | ATA  | TT    | TC    | A-   | AT    | TC   | -AGT | GTG   | TAG  | --    | ACT  | TA   | ----- | TG   | ---  | AAA   | AC   | TAT  | AG      |      |
|                                |         |       |       |       |       |       |       |       |       |       |        | Section 252 |      |        |      |       |      |       |       |      |       |      |      |       |      |       |      |      |       |      |      |       |      |      |         |      |
|                                | (24348) | 24348 | 24360 | 24370 | 24380 | 24390 | 24400 | 24410 | 24420 | 24430 | 24444  |             |      |        |      |       |      |       |       |      |       |      |      |       |      |       |      |      |       |      |      |       |      |      |         |      |
| lambda NC_001416.1 (23546)     |         | TA    | CCA   | ATGT  | TTAA  | CAT   | ACTTT | CAT   | TT    | GTA   | ATAAAC | -TCAA       | TG   | TC     | ATT  | T     | CTT  | CA    | TGT   | AA   | ----- | GAT  | G    | AAATA | ---- | AG    | AG   | TA   | GC    | CTT  | TG   | CCT   |      |      |         |      |
| SARS-CoV-2 NC_045512.2 (17534) |         | GT    | CCA   | GACA  | TGTT  | CT    | CGGA  | CT    | TG    | TCGG  | CGTT   | GT          | CTG  | C      | TG   | CA    | ATT  | G     | TGA   | CA   | TGT   | G    | AGT  | G     | CTT  | TG    | TT   | AT   | GATA  | ATA  | AG   | CT    | TA   | AAG  | CACATAA |      |

## SARS-CoV-2 &amp; lambda.apr

| Section 253                    |         |       |       |       |       |       |       |       |       |       |       |       |
|--------------------------------|---------|-------|-------|-------|-------|-------|-------|-------|-------|-------|-------|-------|
|                                | (24445) | 24445 | 24450 | 24460 | 24470 | 24480 | 24490 | 24500 | 24510 | 24520 | 24530 | 24541 |
| lambda NC_001416.1 (23630)     |         | C     | G     | C     | T     | A     | T     | A     | T     | T     | C     | T     |
| SARS-CoV-2 NC_045512.2 (17631) |         | A     | G     | -     | A     | C     | A     | A     | T     | C     | A     | G     |
| Section 254                    |         |       |       |       |       |       |       |       |       |       |       |       |
|                                | (24542) | 24542 | 24550 | 24560 | 24570 | 24580 | 24590 | 24600 | 24610 | 24620 | 24638 |       |
| lambda NC_001416.1 (23720)     |         | T     | A     | A     | C     | A     | T     | T     | A     | T     | T     | C     |
| SARS-CoV-2 NC_045512.2 (17724) |         | A     | A     | G     | A     | A     | T     | T     | C     | C     | A     | G     |
| Section 255                    |         |       |       |       |       |       |       |       |       |       |       |       |
|                                | (24639) | 24639 | 24650 | 24660 | 24670 | 24680 | 24690 | 24700 | 24710 | 24720 | 24735 |       |
| lambda NC_001416.1 (23817)     |         | C     | A     | A     | T     | T     | C     | A     | A     | T     | T     | C     |
| SARS-CoV-2 NC_045512.2 (17797) |         | G     | T     | A     | G     | C     | T     | C     | A     | A     | T     | T     |
| Section 256                    |         |       |       |       |       |       |       |       |       |       |       |       |
|                                | (24736) | 24736 | 24750 | 24760 | 24770 | 24780 | 24790 | 24800 | 24810 | 24820 | 24832 |       |
| lambda NC_001416.1 (23903)     |         | -     | A     | T     | G     | T     | T     | T     | T     | T     | T     | T     |
| SARS-CoV-2 NC_045512.2 (17890) |         | A     | C     | A     | G     | T     | C     | A     | T     | T     | T     | C     |
| Section 257                    |         |       |       |       |       |       |       |       |       |       |       |       |
|                                | (24833) | 24833 | 24840 | 24850 | 24860 | 24870 | 24880 | 24890 | 24900 | 24910 | 24929 |       |
| lambda NC_001416.1 (23995)     |         | C     | A     | A     | T     | T     | C     | A     | A     | T     | T     | C     |
| SARS-CoV-2 NC_045512.2 (17967) |         | T     | G     | A     | T     | A     | G     | A     | T     | T     | T     | C     |
| Section 258                    |         |       |       |       |       |       |       |       |       |       |       |       |
|                                | (24930) | 24930 | 24940 | 24950 | 24960 | 24970 | 24980 | 24990 | 25000 | 25010 | 25026 |       |
| lambda NC_001416.1 (24090)     |         | A     | T     | T     | C     | A     | T     | T     | A     | T     | T     | C     |
| SARS-CoV-2 NC_045512.2 (18054) |         | A     | G     | G     | A     | C     | -     | -     | T     | C     | T     | A     |
| Section 259                    |         |       |       |       |       |       |       |       |       |       |       |       |
|                                | (25027) | 25027 | 25040 | 25050 | 25060 | 25070 | 25080 | 25090 | 25100 | 25110 | 25123 |       |
| lambda NC_001416.1 (24182)     |         | G     | G     | A     | C     | G     | T     | G     | C     | T     | T     | G     |
| SARS-CoV-2 NC_045512.2 (18140) |         | A     | A     | A     | C     | T     | -     | -     | -     | -     | -     | G     |

## SARS-CoV-2 &amp; lambda.apr

|                                |         |          |           |          |          |           |          |          |          |            |          |                |        |          |          |            |            |           |          |              |              |        |            |       |       |        |      |
|--------------------------------|---------|----------|-----------|----------|----------|-----------|----------|----------|----------|------------|----------|----------------|--------|----------|----------|------------|------------|-----------|----------|--------------|--------------|--------|------------|-------|-------|--------|------|
|                                |         |          |           |          |          |           |          |          |          |            |          | Section 260    |        |          |          |            |            |           |          |              |              |        |            |       |       |        |      |
|                                | (25124) | 25124    | 25130     | 25140    | 25150    | 25160     | 25170    | 25180    | 25190    | 25200      | 25210    | 25220          |        |          |          |            |            |           |          |              |              |        |            |       |       |        |      |
| lambda NC_001416.1 (24276)     |         | ATTT     | GTAC      | CCACCT   | CCCCACCG | ACC       | ATCTATGA | CTGT     | ACGCCACT | GTCC       | CTAGGA   | CTGCTATG-TGCCG | GAGCG  | GACAT    | TACAAACG | TCCTTC     | TCGGTG     |           |          |              |              |        |            |       |       |        |      |
| SARS-CoV-2 NC_045512.2 (18226) |         | AATT     | A-TCA     | AGTTAAT  | GGTTACC  | CTA----   | A---CA   | T---GT   | T-TAT    | CACCCG     | GGAAG    | AGCT           | TATAA  | GACAT    | GTACG    | TGCAT      | GGA        | TGGCT     | TCGATG   |              |              |        |            |       |       |        |      |
|                                |         |          |           |          |          |           |          |          |          |            |          | Section 261    |        |          |          |            |            |           |          |              |              |        |            |       |       |        |      |
|                                | (25221) | 25221    | 25230     | 25240    | 25250    | 25260     | 25270    | 25280    | 25290    | 25300      | 25317    |                |        |          |          |            |            |           |          |              |              |        |            |       |       |        |      |
| lambda NC_001416.1 (24372)     |         | CATGCCAC | T-----    | GT       | TGCCAAT  | GACCT---- | G        | CCTAGG   | AATT     | GGTTAGCAAG | TTAC     | TA             | CCG    | GATTTT   | GTAAA    | AACAGCCCTC | CTCATA     | TAAAAAGT  |          |              |              |        |            |       |       |        |      |
| SARS-CoV-2 NC_045512.2 (18311) |         | TCGAGGGG | TGTCAT    | GCTAC    | TAGA     | GAGCTGTT  | G        | GTACCA   | A        | TTT-----   | ACCT     | TTAC           | AG     | CTAG     | GTTTT    | TCTA       | AGG-TGTTAA | C----     | TAGTTGCT |              |              |        |            |       |       |        |      |
|                                |         |          |           |          |          |           |          |          |          |            |          | Section 262    |        |          |          |            |            |           |          |              |              |        |            |       |       |        |      |
|                                | (25318) | 25318    | 25330     | 25340    | 25350    | 25360     | 25370    | 25380    | 25390    | 25400      | 25414    |                |        |          |          |            |            |           |          |              |              |        |            |       |       |        |      |
| lambda NC_001416.1 (24460)     |         | ATTCGTT  | C         | TTCCG    | ATAAGCG  | TCGTAA    | TTT      | CTATCTTT | CAT      | CAT        | TATTCT   | AGAT           | CCCT-- | CT       | AAAAA    | AATCTTCC   | GAGT       | TTGCTAGGC | ACTG     | ATAC         |              |        |            |       |       |        |      |
| SARS-CoV-2 NC_045512.2 (18397) |         | GT--ACCT | AC        | AGGTT    | AT       | GTTGA     | TACACC   | TAA      | TAA      | TA--       | CAG      | AT             | TTT    | TCCAG    | AGT      | TAG--TG    | CTA        | AA        | CCGCTG   | GAGATCA----- | ATTTAAAC     |        |            |       |       |        |      |
|                                |         |          |           |          |          |           |          |          |          |            |          | Section 263    |        |          |          |            |            |           |          |              |              |        |            |       |       |        |      |
|                                | (25415) | 25415    | 25420     | 25430    | 25440    | 25450     | 25460    | 25470    | 25480    | 25490      | 25500    | 25511          |        |          |          |            |            |           |          |              |              |        |            |       |       |        |      |
| lambda NC_001416.1 (24555)     |         | ATAAC    | -TCTTTTCC | AATA     | ATTGG    | GGA       | AGTC     | ATT      | CA       | AAT        | CTATAATA | G              | GT     | TCAG     | ATT      | TGCT       | CAAT       | AAAT      | TC       | TGAC         | TGTAGCTG-CTG | AAACGT | TGCT       |       |       |        |      |
| SARS-CoV-2 NC_045512.2 (18482) |         | ACCT     | CAT       | TACCACTT | ATGT     | ACAAA     | GGA      | CT       | TC       | TT         | GGAAT    | -G             | TAGTGC | G        | TAT      | AA--       | AGAT       | TG        | TAC---   | AAAT         | GT           | TAG    | TGACA      | CAC   | TTAA  | AAATC  | TCTC |
|                                |         |          |           |          |          |           |          |          |          |            |          | Section 264    |        |          |          |            |            |           |          |              |              |        |            |       |       |        |      |
|                                | (25512) | 25512    | 25520     | 25530    | 25540    | 25550     | 25560    | 25570    | 25580    | 25590      | 25608    |                |        |          |          |            |            |           |          |              |              |        |            |       |       |        |      |
| lambda NC_001416.1 (24650)     |         | ---GGTT  | GAAC      | TAT      | ATT      | C         | TTAT     | AA-      | CTTT     | TACGAAA    | GAGTT    | TCTT           | TG-    | AGT      | AA       | TC         | ACTT       | CACTC     | AA       | G---TGCTT    | CC-----      | CTG    | CCTCCAAACG |       |       |        |      |
| SARS-CoV-2 NC_045512.2 (18573) |         | TGACAGA  | GTCG      | TAT      | TGT      | -CTTAT    | GGG      | CACA     | T        | GGCTTT     | GAGTT    | GACA           | TCT    | ATG      | AA       | GT         | ATTT       | TGTGA     | AA       | ATAGGAC--    | CTGAGCG      | CAC    | CTGTTGTCTA |       |       |        |      |
|                                |         |          |           |          |          |           |          |          |          |            |          | Section 265    |        |          |          |            |            |           |          |              |              |        |            |       |       |        |      |
|                                | (25609) | 25609    | 25620     | 25630    | 25640    | 25650     | 25660    | 25670    | 25680    | 25690      | 25705    |                |        |          |          |            |            |           |          |              |              |        |            |       |       |        |      |
| lambda NC_001416.1 (24734)     |         | ATACC    | TGTTA     | GCAAT    | ATT      | TAA       | TAGCTT   | GAAAT    | GATGA    | AG         | AGCT     | CTG            | TGTT   | TGT      | CTT      | CTG        | CTC        | CAG       | TT       | GCCGG        | G            | CATT   | CAAC       | CATA  | AAAA  | CTGATA |      |
| SARS-CoV-2 NC_045512.2 (18667) |         | TGTGA    | TAGAC     | GTGCC    | ACA      | TGC       | TTTTCC   | ACTG     | CTTCAG   | AC         | ACT      | TAT            | GC--   | TGT      | TGG      | CAT-       | CATT       | CTAT      | TG       | GATTT        | GAT          | TACGT  | CTAT       | AA    | TC    | CGTT   | TAT  |
|                                |         |          |           |          |          |           |          |          |          |            |          | Section 266    |        |          |          |            |            |           |          |              |              |        |            |       |       |        |      |
|                                | (25706) | 25706    | 25720     | 25730    | 25740    | 25750     | 25760    | 25770    | 25780    | 25790      | 25802    |                |        |          |          |            |            |           |          |              |              |        |            |       |       |        |      |
| lambda NC_001416.1 (24831)     |         | GC       | ACCCG     | GAGT     | TC       | GGAA      | AC       | GAAA     | TTT-G    | CA         | TA       | TA             | CC     | ATTGCTCA | G        | AAAA       | AAA        | AATGTCC   | TTGTC    | GATATAGG     | GAT          | GAA    | TCGCTTGG   | TGTAC | CTCA  |        |      |
| SARS-CoV-2 NC_045512.2 (18761) |         | TG       | ATT--     | GATG     | TT       | CAAC      | AA       | TGGG     | TTT      | TAC        | AGG      | TA             | CC     | TA-CAAAG | CA       | ACC        | ATG        | ATCTGTA   | TTGTC    | A            | GTCCAT       | G      | TAATG---   | CACA  | TGTAG | CTAG   |      |

## SARS-CoV-2 &amp; lambda.apr

|                                |         |            |            |                  |             |            |               |               |                  |                |                                              |
|--------------------------------|---------|------------|------------|------------------|-------------|------------|---------------|---------------|------------------|----------------|----------------------------------------------|
| Section 267                    |         |            |            |                  |             |            |               |               |                  |                |                                              |
|                                | (25803) | 25803      | 25810      | 25820            | 25830       | 25840      | 25850         | 25860         | 25870            | 25880          | 25899                                        |
| lambda NC_001416.1 (24927)     |         | -TCTAC     | TGCGAAA    | ACTTGACCTTTCTCTC | CCATAT      | TGCAGT     | CGCGGCACGATGG | AACTAAA       | TTAATA           | GGCATC-----    | ACCGAAAATTCAGG-ATA                           |
| SARS-CoV-2 NC_045512.2 (18852) |         | TGTGTA     | TGCAATCA   | TGACTAGG----     | TGTCTA-GC   | TGTCCA     | CGAGTGCTTTGT  | TAA           | GCGTGT           | TTGACTGGAC     | TATTGAATATCCTATAATTGGTGATG                   |
| Section 268                    |         |            |            |                  |             |            |               |               |                  |                |                                              |
|                                | (25900) | 25900      | 25910      | 25920            | 25930       | 25940      | 25950         | 25960         | 25970            | 25980          | 25996                                        |
| lambda NC_001416.1 (25016)     |         | ATGTGC     | AATAGGA    | AGAAAA           | TGATCT--    | ATATTT     | TTTTGTCTGTCC  | TATATC        | ACCACANAATGG     | ACATTTTTTC     | ACCTGATGAAACAAGCATGTCA                       |
| SARS-CoV-2 NC_045512.2 (18944) |         | AAC        | TGAAGATTAA | TGCGGCTTG        | TAGAAAGG-TT | CAACA      | CATGGTTGT     | TAAAGCTGC     | ATTATTAGCAGACAA  | ATTCCCA        | GTTCTT-CACGACAT                              |
| Section 269                    |         |            |            |                  |             |            |               |               |                  |                |                                              |
|                                | (25997) | 25997      | 26010      | 26020            | 26030       | 26040      | 26050         | 26060         | 26070            | 26080          | 26093                                        |
| lambda NC_001416.1 (25111)     |         | AAATAT---- | GTTC       | TAGCGG           | GT          | TGTTTTT    | ATCTCGGAG     | ATTATTTT      | CA               | TAAAGCTTT      | CTAATTTAACCTTTGTCAGGTT                       |
| SARS-CoV-2 NC_045512.2 (19039) |         | AA         | CCCTAAA    | GCTAT            | TAA         | GTGT       | TACCTCAAGCT   | GATGTAGAAT    | GGAAGT           | TCTATGATGCAC   | AGCCTTG--T-----AGTGACAAAGC-----T             |
| Section 270                    |         |            |            |                  |             |            |               |               |                  |                |                                              |
|                                | (26094) | 26094      | 26100      | 26110            | 26120       | 26130      | 26140         | 26150         | 26160            | 26170          | 26180 26190                                  |
| lambda NC_001416.1 (25202)     |         | TGTAGGC    | TCAAGAGGG  | TGTGTCTCTG       | TCGTAGGTAA  | ATAACTGAC  | CTGT          | CGAGCT        | TAAATAT          | TCTATAT        | TGTTGTCTTTCTGCAAAAAAGTGGGGGAAG               |
| SARS-CoV-2 NC_045512.2 (19120) |         | TATAAAA    | TAGAAGAAT  | TATCTA--         | TTC         | TATAGCC    | ACACA--TT     | CTGAC         | AAAT             | TACAGAT        | GGTGTATGCCTATTTTG-----GAATTGCA               |
| Section 271                    |         |            |            |                  |             |            |               |               |                  |                |                                              |
|                                | (26191) | 26191      | 26200      | 26210            | 26220       | 26230      | 26240         | 26250         | 26260            | 26270          | 26287                                        |
| lambda NC_001416.1 (25299)     |         | TGAGT      | AATGAAA--  | TAT              | TTCTAACATT  | TATCTGCATC | ATACCT        | TCCGAGCAT     | TTTATTAAGCATTTTC | GCTATAAGTTCTCG | CTGGAAAGAGGTAGTT                             |
| SARS-CoV-2 NC_045512.2 (19203) |         | TGTCG      | ATA        | GATA             | TCC         | TGCTAA--   | TTCCAT        | TGT           | TGTAGAT          | T--TGAC        | ACTA-----GAGTGCTATC-----TAACTTTAACTTGCTGCTGG |
| Section 272                    |         |            |            |                  |             |            |               |               |                  |                |                                              |
|                                | (26288) | 26288      | 26300      | 26310            | 26320       | 26330      | 26340         | 26350         | 26360            | 26370          | 26384                                        |
| lambda NC_001416.1 (25393)     |         | TTTT       | TCATT      | GTACTTTACCT      | TTCATCT     | CTGTTC     | AT--TAT       | CATCGC--      | TTTTAA           | ACGGT--        | TCGACCTTCTAA                                 |
| SARS-CoV-2 NC_045512.2 (19278) |         | TTGT       | GAT-G      | GTGGCAGTT        | TGTATG      | TAA--AT    | AAACATG       | CATTC         | CACACACC         | AGCTTT         | TGATAAAAGTGCTTTTGT                           |
| Section 273                    |         |            |            |                  |             |            |               |               |                  |                |                                              |
|                                | (26385) | 26385      | 26390      | 26400            | 26410       | 26420      | 26430         | 26440         | 26450            | 26460          | 26470 26481                                  |
| lambda NC_001416.1 (25484)     |         | AGAA       | TGGT       | T-TC             | ATAAGAAAG   | CTCTG      | AATCAA        | CGGACTGC-GAT- | ATAAGTGGT        | GGTATCC        | AGAATTTGTCACTTCAAGT                          |
| SARS-CoV-2 NC_045512.2 (19371) |         | TTTC       | TAT        | TAC              | TC          | TGACAGT--  | CCATG         | TGA-GTCTC     | ATG              | AAAAACAAGTAGTG | CAGATATAGATT-----ATGTACCACTA                 |

SARS-CoV-2 & lambda.apr

[illegible]



## SARS-CoV-2 &amp; lambda.apr

|                                |           |          |            |           |            |           |          |          |           |             |            |             |           |            |                      |          |       |            |
|--------------------------------|-----------|----------|------------|-----------|------------|-----------|----------|----------|-----------|-------------|------------|-------------|-----------|------------|----------------------|----------|-------|------------|
|                                |           |          |            |           |            |           |          |          |           |             |            | Section 281 |           |            |                      |          |       |            |
|                                | (27161)   | 27161    | 27170      | 27180     | 27190      | 27200     | 27210    | 27220    | 27230     | 27240       | 27257      |             |           |            |                      |          |       |            |
| lambda NC_001416.1 (26218)     | AA---     | AAGG--   | A          | TCAAATGC  | ACTAAACG   | AAA       | CTGAAA   | CAAGCGAT | TCGAA---- | AATAT-CCCT  | TTGGGATT-- | CTTGACTCGAT | AAGTCTAT  | TATTT      |                      |          |       |            |
| SARS-CoV-2 NC_045512.2 (20102) | GTCTT     | AATGGAG  | TCACATTA   | ATTGGAGA  | AGCGT      | AAAAACA   | CAGTTC   | AAATTATT | ATAAGAAAG | T--TGATGGTG | TT-GTC     | CAACAA      | TACCT     | TGAAC      |                      |          |       |            |
|                                |           |          |            |           |            |           |          |          |           |             |            | Section 282 |           |            |                      |          |       |            |
|                                | (27258)   | 27258    | 27270      | 27280     | 27290      | 27300     | 27310    | 27320    | 27330     | 27340       | 27354      |             |           |            |                      |          |       |            |
| lambda NC_001416.1 (26303)     | TCAGAGAAA | -AATATTC | ATTGTTTT   | CTGGTGGTG | GATTGC-    | ACCAATC   | ATTCATTC | CAAAATTG | -----     | TTGTTT      | TACACACCC  | AT          | TCCGCC    |            |                      |          |       |            |
| SARS-CoV-2 NC_045512.2 (20196) | TTACTTT   | ACTCAGAG | TAGAAATTTA | -CAAGAA   | TTT-A----- | AACCA     | GAGAGTCA | AAATGG   | AAATTG    | ATTTCT      | TAGAA      | TTAGC       | TATG-G    | ATGA----   |                      |          |       |            |
|                                |           |          |            |           |            |           |          |          |           |             |            | Section 283 |           |            |                      |          |       |            |
|                                | (27355)   | 27355    | 27360      | 27370     | 27380      | 27390     | 27400    | 27410    | 27420     | 27430       | 27440      | 27451       |           |            |                      |          |       |            |
| lambda NC_001416.1 (26392)     | GATAAA    | AAGCATGA | ATGTTCTG   | TGCTGGGCA | TAGAA      | TTAACCGT  | CACCT--  | CAAAAG   | GTAT----- | A-----      | GTAAATCA   | CTGAAT      | TCCGGG    | GAGCACTT   |                      |          |       |            |
| SARS-CoV-2 NC_045512.2 (20280) | -----     | ATT      | CAT        | TGA       | A-CGG---   | TATAAAT   | TAGAA    | GGCTATG  | CGTTC     | GAA         | CATATC     | GTATT       | TATGGAG   | ATTTTAGTCA | TAGTCAGT-TAGGTG----- | GT       |       |            |
|                                |           |          |            |           |            |           |          |          |           |             |            | Section 284 |           |            |                      |          |       |            |
|                                | (27452)   | 27452    | 27460      | 27470     | 27480      | 27490     | 27500    | 27510    | 27520     | 27530       | 27548      |             |           |            |                      |          |       |            |
| lambda NC_001416.1 (26477)     | TTTCTAT   | TAAATG   | AAAAGT     | GGA-AA    | TCTGAC     | AAATTC    | TGGCAA   | ACC--    | ATTTAACAC | ACGTGC      | GAACTGT    | TCCATGA     | ATTTCTGA  | AAGAGTT    | ACCCCTC              |          |       |            |
| SARS-CoV-2 NC_045512.2 (20362) | TTACATC   | TA-----  | CTGATT     | GGA       | CTAGCT     | AAACGT    | TTTAA    | GGAATC   | ACCTTTTG  | AAT-TA      | GAA        | GATTTT      | ATTCC     | TATGGAC    | AGTACAGT---          | TAA      |       |            |
|                                |           |          |            |           |            |           |          |          |           |             |            | Section 285 |           |            |                      |          |       |            |
|                                | (27549)   | 27549    | 27560      | 27570     | 27580      | 27590     | 27600    | 27610    | 27620     | 27630       | 27645      |             |           |            |                      |          |       |            |
| lambda NC_001416.1 (26571)     | TAAAGTA   | -ATG     | AGGTGTTA   | AGGA-C    | GCTTTCAT   | -TTT----- | CAATG    | --TCGGC  | TAATCG    | ATT         | TGGCCAT    | ACTACT      | TAAATCCTG | AATAGCTTT  |                      |          |       |            |
| SARS-CoV-2 NC_045512.2 (20448) | AAAC      | TAATT    | TCATA      | -ACAG     | ATGCG      | CAACAGG   | TTCA     | TCTAAGT  | GTGTGTG   | TCTGT       | TATGATTT   | ATTACTTG    | ATGATTT   | TGTTGAAAT  | A-ATAAAA             | T        |       |            |
|                                |           |          |            |           |            |           |          |          |           |             |            | Section 286 |           |            |                      |          |       |            |
|                                | (27646)   | 27646    | 27660      | 27670     | 27680      | 27690     | 27700    | 27710    | 27720     | 27730       | 27742      |             |           |            |                      |          |       |            |
| lambda NC_001416.1 (26653)     | AAG       | AAGGTT   | AT---GTT   | TA        | AAACATC    | GCTTAAT   | TGCTGAG  | ATTAAC   | ATAGTAGTC | AATGCTT     | TACCTAAGG  | AAAAAACA    | TTTCAGG   | GGA        | -TT                  |          |       |            |
| SARS-CoV-2 NC_045512.2 (20543) | CCC       | AAGATT   | TATCTG---  | TA        | GTTTCTAAG  | GTG--T    | CAAAGT   | GAC---T  | ATG       | ACTATACAG   | AAATTT     | CATT-----   | TATGC     | TTTGGTGT   | AAG                  |          |       |            |
|                                |           |          |            |           |            |           |          |          |           |             |            | Section 287 |           |            |                      |          |       |            |
|                                | (27743)   | 27743    | 27750      | 27760     | 27770      | 27780     | 27790    | 27800    | 27810     | 27820       | 27839      |             |           |            |                      |          |       |            |
| lambda NC_001416.1 (26745)     | GACTGA    | ATT      | TTTTATCT   | ATTAAT    | GAA        | TAA       | GTGCTT   | CTTC-TT  | CTTTT     | GAC-CT      | ACAAAAC    | CAATT       | TTAACA    | TTT        | CCGATATC             | GCATTTTT | --C-A |            |
| SARS-CoV-2 NC_045512.2 (20624) | ATGGCC    | ATGT     | -----      | AG        | AAAC       | AT--T     | TA       | CCCAAA   | ATTAC     | AAT-CT      | AGTCA      | -AGCGT      | GGAAC     | CGGT       | ---GTT               | GCT---   | ATGCC | TA-ATCTTTA |

SARS-CoV-2 & lambda.apr

|                        |         |             |                 |              |                 |              |             |                |              |              |             |            |              |  |  |  |  |  |  |  |  |
|------------------------|---------|-------------|-----------------|--------------|-----------------|--------------|-------------|----------------|--------------|--------------|-------------|------------|--------------|--|--|--|--|--|--|--|--|
|                        |         |             |                 |              |                 |              |             |                |              |              | Section 288 |            |              |  |  |  |  |  |  |  |  |
|                        | (27840) | 27840       | 27850           | 27860        | 27870           | 27880        | 27890       | 27900          | 27910        | 27920        | 27936       |            |              |  |  |  |  |  |  |  |  |
| lambda NC_001416.1     | (26837) | CCATGCTCATC | AAAGACAGT       | AGATAAAA     | CATTGTGTAAC     | AAA-GGAATA   | GTCATTCCAAC | CATCTGCTCGTAGG | AATGCCTTATT  | TTTTTCTTACTG | CA          |            |              |  |  |  |  |  |  |  |  |
| SARS-CoV-2 NC_045512.2 | (20703) | CAAATGCG    | AAAGATGCT       | ATTAGAAA     | AGTGTGACCTTCAAA | ATTATG       | GGTGATAGTG  | CACACA         | TTACCTA      | AAAGGC       | ATAATATGA   | TGAAT-GTCG |              |  |  |  |  |  |  |  |  |
|                        |         |             |                 |              |                 |              |             |                |              |              | Section 289 |            |              |  |  |  |  |  |  |  |  |
|                        | (27937) | 27937       | 27950           | 27960        | 27970           | 27980        | 27990       | 28000          | 28010        | 28020        | 28033       |            |              |  |  |  |  |  |  |  |  |
| lambda NC_001416.1     | (26933) | G--GAATATAC | CGCCTCTT        | TCAATAACACT  | AAACTTCC        | AACATATAGT   | TAACTTAATT  | TATTAA         | AAATAAC      | CGCAATTTATT  | TGGCGGCA    | ACACAG     |              |  |  |  |  |  |  |  |  |
| SARS-CoV-2 NC_045512.2 | (20792) | CAA-AATATAC | TCAACTGT        | TCAATA       | TTTAAACAC       | ATTAAACAT    | TAGCTGT     | TAATATAG       | AGTTAT       | CATTTTGGTGC  | TGGT        | TCTGATAAAG |              |  |  |  |  |  |  |  |  |
|                        |         |             |                 |              |                 |              |             |                |              |              | Section 290 |            |              |  |  |  |  |  |  |  |  |
|                        | (28034) | 28034       | 28040           | 28050        | 28060           | 28070        | 28080       | 28090          | 28100        | 28110        | 28120       | 28130      |              |  |  |  |  |  |  |  |  |
| lambda NC_001416.1     | (27028) | GATCT       | -----CTCTTT     | TAAAGTTAC    | TCTCTATTACAT    | TACGT        | TTCCATC     | TAA-AA-AAT     | TAGTAGT      | ATTGA        | ACTTAA      | CGGGC      | ATCGTATTGTA  |  |  |  |  |  |  |  |  |
| SARS-CoV-2 NC_045512.2 | (20888) | GAGTT       | TGCACCAGGTACAGC | TG---        | T-TTTAAGACAGTGG | TGCC         | TACG--GG    | TACGCTGC       | TTGT         | CATTCA       | GATCTTAA    | GACTTTG    | TCTCTGATGC   |  |  |  |  |  |  |  |  |
|                        |         |             |                 |              |                 |              |             |                |              |              | Section 291 |            |              |  |  |  |  |  |  |  |  |
|                        | (28131) | 28131       | 28140           | 28150        | 28160           | 28170        | 28180       | 28190          | 28200        | 28210        | 28227       |            |              |  |  |  |  |  |  |  |  |
| lambda NC_001416.1     | (27113) | GTTTTC      | CATATTTAGCTTT   | CTGCTTCTCTTT | TGGATAAC        | CACTGT       | TATTCAT     | GTTCAT         | GGTGC        | -----CTGT    | TTATA       | CCACGA     | TATAGTCTTATT |  |  |  |  |  |  |  |  |
| SARS-CoV-2 NC_045512.2 | (20979) | AGATTTC     | AACTTTGATTGG    | TGATTGT      | TCAAC           | TGTACATA     | CAGCTA      | ATAAATGG       | GATCTCATTATT | AGTGATA      | TGTACGAC    | CCTAAGA    | CTAAAAATG--  |  |  |  |  |  |  |  |  |
|                        |         |             |                 |              |                 |              |             |                |              |              | Section 292 |            |              |  |  |  |  |  |  |  |  |
|                        | (28228) | 28228       | 28240           | 28250        | 28260           | 28270        | 28280       | 28290          | 28300        | 28310        | 28324       |            |              |  |  |  |  |  |  |  |  |
| lambda NC_001416.1     | (27205) | AAATGC      | ATATATAGTATCG   | CCGAACGA     | ATTAGCTCTT      | CAG-GCTT     | CTGAAGAA    | CGTTTCA        | AGTACTA      | ----ATAAG    | CCGATAG     | ATAG       | CCACGGACTTC  |  |  |  |  |  |  |  |  |
| SARS-CoV-2 NC_045512.2 | (21074) | -TTTACA     | AAAGAA-ATGAC    | TCTA--AAG    | AGGGTT          | TTTTCACTT    | ACATTTGT    | GGTTTATA       | CAACAA       | AAGCTAGCT    | CTTGG       | AGGT-T     | CCGTGGCTATA  |  |  |  |  |  |  |  |  |
|                        |         |             |                 |              |                 |              |             |                |              |              | Section 293 |            |              |  |  |  |  |  |  |  |  |
|                        | (28325) | 28325       | 28330           | 28340        | 28350           | 28360        | 28370       | 28380          | 28390        | 28400        | 28410       | 28421      |              |  |  |  |  |  |  |  |  |
| lambda NC_001416.1     | (27297) | GTAGCC      | ATTTTTCAT       | AAGTGTTAA    | CTTCCGC-T       | CCTCGCTCAT   | ACAGAC      | -ATTCACTACA    | GTATATGGC    | GGAAGGT      | ATGCA       | TGCGGTGT   | GGGGGA       |  |  |  |  |  |  |  |  |
| SARS-CoV-2 NC_045512.2 | (21166) | AAGATA      | ACAGAA          | CATCTCTG     | -GAATGCTGATC    | TTTATAAG     | CTCATGG     | GACAC          | TTCGAT--GGT  | TGGACAG      | CCCTTTGT    | TACTA      | ATGTGAA----- |  |  |  |  |  |  |  |  |
|                        |         |             |                 |              |                 |              |             |                |              |              | Section 294 |            |              |  |  |  |  |  |  |  |  |
|                        | (28422) | 28422       | 28430           | 28440        | 28450           | 28460        | 28470       | 28480          | 28490        | 28500        | 28518       |            |              |  |  |  |  |  |  |  |  |
| lambda NC_001416.1     | (27392) | AGTCGT      | GAAAG----       | AAAGAAGT     | CAGCTG          | CTGCTTTG     | ACATCACTGC  | TATCTT         | CTTACT       | GTGTTAT      | GAGGTCGTAG  | TGGGTGGC   | ACACAAAGCTT  |  |  |  |  |  |  |  |  |
| SARS-CoV-2 NC_045512.2 | (21252) | -TGC        | CGTCATCATCTG    | AAGCATT      | TTA-ATTG        | -----ATGTAAT | TATCTT      | GGCA           | AAACCACGC    | GACAAATAGA   | TGGT        | ---        | ATGT----CAT  |  |  |  |  |  |  |  |  |

## SARS-CoV-2 &amp; lambda.apr

|                                |         |                     |           |           |                |            |                |         |              |                          |                                    |                               |                     |                            |                            |       |     |     |         |      |            |                |
|--------------------------------|---------|---------------------|-----------|-----------|----------------|------------|----------------|---------|--------------|--------------------------|------------------------------------|-------------------------------|---------------------|----------------------------|----------------------------|-------|-----|-----|---------|------|------------|----------------|
|                                |         |                     |           |           |                |            |                |         |              |                          |                                    | Section 295                   |                     |                            |                            |       |     |     |         |      |            |                |
|                                | (28519) | 28519               | 28530     | 28540     | 28550          | 28560      | 28570          | 28580   | 28590        | 28600                    | 28615                              |                               |                     |                            |                            |       |     |     |         |      |            |                |
| lambda NC_001416.1 (27485)     |         | TGCACTG-G           | ATTG      | CGAGGC    | TTTGT          | GCTTCTCTGG | AGTGCGA        | CAGGTT  | GATG         | ACAAAAAATTAG             | CGCAAGAAGACAAAATCACCTTTGGCGCTAATGC |                               |                     |                            |                            |       |     |     |         |      |            |                |
| SARS-CoV-2 NC_045512.2 (21330) |         | GCATGC-AA           | ATTAC     | CATATT    | TTGGAG         | GAA-----T  | ACAAATC        | CAATT   | CAGTTG       | -TCTTCCT-ATTCT-TTATTTGAC | ATGAGTAAATTTCCCTTAAA               |                               |                     |                            |                            |       |     |     |         |      |            |                |
|                                |         |                     |           |           |                |            |                |         |              |                          |                                    | Section 296                   |                     |                            |                            |       |     |     |         |      |            |                |
|                                | (28616) | 28616               | 28630     | 28640     | 28650          | 28660      | 28670          | 28680   | 28690        | 28700                    | 28712                              |                               |                     |                            |                            |       |     |     |         |      |            |                |
| lambda NC_001416.1 (27581)     |         | TCTGTTACA           | GGT       | CACTAA    | TACCA          | TCTAAGT    | AGTT           | GATT    | CATAGTGA-CTG | CATATGTTGTGTTTTACAG      | TATTATGTAG-TCTGTTTTTTATGCAAA       |                               |                     |                            |                            |       |     |     |         |      |            |                |
| SARS-CoV-2 NC_045512.2 (21418) |         | TTAAGGG--           | GTA       | CTGCTG    | TATG           | TCT        | TTAA           | --      | AGA          | AGGTCA                   | AATCAA                             | TG                            | ATATG-----          | ATTTTATCTCTTCT             | TAGTTAAAGGTAGAC            |       |     |     |         |      |            |                |
|                                |         |                     |           |           |                |            |                |         |              |                          |                                    | Section 297                   |                     |                            |                            |       |     |     |         |      |            |                |
|                                | (28713) | 28713               | 28720     | 28730     | 28740          | 28750      | 28760          | 28770   | 28780        | 28790                    | 28809                              |                               |                     |                            |                            |       |     |     |         |      |            |                |
| lambda NC_001416.1 (27676)     |         | ATCTAATT            | TAA       | ATATTTG   | ATATTTATATCA   | TTT        | TACGTT         | TCTCG   | TTCAG        | CTTT                     | TTTATACTAAGTTGGC                   | ATTATAAAAAAGCATTGCTTATCAATTTT |                     |                            |                            |       |     |     |         |      |            |                |
| SARS-CoV-2 NC_045512.2 (21497) |         | TATAAATT            | AGAGA     | -----     | AAACAACAGAGT   | TGTTA      | TTTCT          | AGTG    | ATGTTCTT     | GTTAA                    | CA                                 | AACT--AAACG                   | AACA                | ATGT-----                  | TGTTTTT                    |       |     |     |         |      |            |                |
|                                |         |                     |           |           |                |            |                |         |              |                          |                                    | Section 298                   |                     |                            |                            |       |     |     |         |      |            |                |
|                                | (28810) | 28810               | 28820     | 28830     | 28840          | 28850      | 28860          | 28870   | 28880        | 28890                    | 28906                              |                               |                     |                            |                            |       |     |     |         |      |            |                |
| lambda NC_001416.1 (27773)     |         | GTTGCAACGAACAGGTCAC | TATCA     | GTCAA     | ATA            | AAATC      | ATTATTTGA      | TTTCAAT | TTTTG        | TCCCA                    | CTCCCTG                            | CC-TCTGTC                     | ATCAC               | GATACGTGTGATGC             |                            |       |     |     |         |      |            |                |
| SARS-CoV-2 NC_045512.2 (21575) |         | CTT-----            | GTT       | TATTG     | GC--           | CAC        | TAGTC          | TC      | TAGTCAGTG    | T--GT                    | TAA                                | CTT                           | TACA                | ----AC                     | CAGAACTCAATTACCCCCTGCATACA |       |     |     |         |      |            |                |
|                                |         |                     |           |           |                |            |                |         |              |                          |                                    | Section 299                   |                     |                            |                            |       |     |     |         |      |            |                |
|                                | (28907) | 28907               | 28920     | 28930     | 28940          | 28950      | 28960          | 28970   | 28980        | 28990                    | 29003                              |                               |                     |                            |                            |       |     |     |         |      |            |                |
| lambda NC_001416.1 (27869)     |         | CATGGTG             | TCCGA     | CTT       | ATGCCCG        | AGAA       | GATGTTGAGCAA-- | AC      | TTATC--      | GCTTAT-CTG               | CTTCTCATAGAGT                      | CTTG                          | CAGACAACTGCGCAACTCG |                            |                            |       |     |     |         |      |            |                |
| SARS-CoV-2 NC_045512.2 (21648) |         | C-----              | TAA       | TT        | CTT            | T-----     | CACAC          | G       | T-----       | GGTGT                    | TTAT                               | TACC                          | CTG                 | ACAAAGTTTCAG-ATCCT--       | CAGTTTTACATTC-----A        |       |     |     |         |      |            |                |
|                                |         |                     |           |           |                |            |                |         |              |                          |                                    | Section 300                   |                     |                            |                            |       |     |     |         |      |            |                |
|                                | (29004) | 29004               | 29010     | 29020     | 29030          | 29040      | 29050          | 29060   | 29070        | 29080                    | 29090                              | 29100                         |                     |                            |                            |       |     |     |         |      |            |                |
| lambda NC_001416.1 (27960)     |         | TGAAAGGTA           | GGCGGATCC | CCTTCG-   | AAGGAAAGACCTGA | TG-        | CTTTTC         | G-----  | TGCGCG       | CATAAA                   | ATACCT                             | -TGATACT                      | GTG                 | CCGGATGAA                  |                            |       |     |     |         |      |            |                |
| SARS-CoV-2 NC_045512.2 (21713) |         | ACTCA               | A----     | GGACTTGTT | CT----         | TA         | -----          | CC      | TTT          | CTTTTC                   | CAATGTTACT                         | TGGTTC                        | CATGCT              | ATACATGTC-TCTGGGACCAATGTAC |                            |       |     |     |         |      |            |                |
|                                |         |                     |           |           |                |            |                |         |              |                          |                                    | Section 301                   |                     |                            |                            |       |     |     |         |      |            |                |
|                                | (29101) | 29101               | 29110     | 29120     | 29130          | 29140      | 29150          | 29160   | 29170        | 29180                    | 29197                              |                               |                     |                            |                            |       |     |     |         |      |            |                |
| lambda NC_001416.1 (28045)     |         | GCG                 | GTT       | CGCGAC    | GAG            | TAGATGCAAT | TA             | TGGTT   | TC           | FCC                      | GC                                 | CAAGAATC                      | CTT                 | TGC--A                     | TTTATCAA                   | GTG   | TTT | CCT | TATTGAT | ATTC | CGA-GAGCAT |                |
| SARS-CoV-2 NC_045512.2 (21790) |         | TAA                 | GAG-----  | GTT       | T-----         | GAT        | TA             | ACCC-   | TG           | FCC                      | TAC                                | CA                            | TTTAA               | TGAT---                    | GGTG                       | TTTAT | TTT | GC- | TT      | CAC  | TAG----    | AAGTCTAACATAAT |

SARS-CoV-2 & lambda.apr

|                                |         |            |            |            |               |            |            |                |            |             |                      |                  |                  |             |            |         |         |        |      |   |     |
|--------------------------------|---------|------------|------------|------------|---------------|------------|------------|----------------|------------|-------------|----------------------|------------------|------------------|-------------|------------|---------|---------|--------|------|---|-----|
|                                | (29198) | 29198      | 29210      | 29220      | 29230         | 29240      | 29250      | 29260          | 29270      | 29280       | Section 302          |                  |                  |             |            |         |         |        |      |   |     |
| lambda NC_001416.1 (28138)     | C       | AATATGC    | AATGCTGT   | TGGGAT     | TGGCAATTTTTAC | GCGCTGTTT  | TGCTTGCT   | TGCTGACATAAAGA | TATCCAT    | TCTACGATATC | -AGAC-CACTTCATTTC    | G                |                  |             |            |         |         |        |      |   |     |
| SARS-CoV-2 NC_045512.2 (21865) | -       | AAAGAGGC   | TGGATTT    | TTGGTACTA  | CTT-----      | -----      | -----      | TAGATTTCGAAGA  | CC-CAGT--- | CCC         | TACTTATTGTTAATAA--CG | CT               |                  |             |            |         |         |        |      |   |     |
|                                | (29295) | 29295      | 29300      | 29310      | 29320         | 29330      | 29340      | 29350          | 29360      | 29370       | Section 303          |                  |                  |             |            |         |         |        |      |   |     |
| lambda NC_001416.1 (28233)     | C       | ATAAAT     | CACCAAC    | TCGTTGCC   | CGGTAA        | CAAAG--CCA | GTTC       | CATTCAGTCTG    | AGCCAACA   | TGGTG       | TGATGATTCTGC         | TGCTTGATAAATTTTC | AG               |             |            |         |         |        |      |   |     |
| SARS-CoV-2 NC_045512.2 (21932) | -       | ACTAAT     | GTTGTTA    | TAAAAGT    | CTGTG         | AAATTTCA   | ATTTT-GT   | AATGATTC       | CAT-----   | TTT         | TG--G-----           | G                | TGTTAT-TACCACAAA |             |            |         |         |        |      |   |     |
|                                | (29392) | 29392      | 29400      | 29410      | 29420         | 29430      | 29440      | 29450          | 29460      | 29470       | Section 304          |                  |                  |             |            |         |         |        |      |   |     |
| lambda NC_001416.1 (28328)     | G       | TATTCGTC   | AGCCGTA    | AGTCTTG    | -ATCTCCT      | TACCTCTGAT | TTTGCT     | GCGCG-AGT      | GGC--AG    | C           | GACATGGTTT           | TGTGTGT          | TATATGGCCTT      | CAGCTAT     |            |         |         |        |      |   |     |
| SARS-CoV-2 NC_045512.2 (22005) | AC      | AACAA-A    | AGTTGGA--- | TGGAAGT    | GAGTT         | CAGAGTTAT  | -TCTAGT    | GCGAATA        | AATTGCA    | CTTT--T     | GAATAT               | TGCTCTCA--G      | CTTTTCT          | TA          |            |         |         |        |      |   |     |
|                                | (29489) | 29489      | 29500      | 29510      | 29520         | 29530      | 29540      | 29550          | 29560      | 29570       | Section 305          |                  |                  |             |            |         |         |        |      |   |     |
| lambda NC_001416.1 (28421)     | TG      | CCTCT      | GGAATGC    | ATCG--CTC  | AGT-GTTG      | A          | CTGATTTA   | ACTTGGC--TG    | ACGCCGCCT  | TGCCCTC     | GTC                  | TA-TGTA          | TCCAT            | TGAGCATT-GC | CG         |         |         |        |      |   |     |
| SARS-CoV-2 NC_045512.2 (22092) | TG      | GACCTT     | GAGGAAAC   | CAGGGTA    | ATTTC---AA    | AAATCTTA   | GGAATTTG   | TGTT-TA        | AGAAATATT  | GATGGTTAT   | TATTTTA              | AAATATATTT       | CTAAGCA          |             |            |         |         |        |      |   |     |
|                                | (29586) | 29586      | 29600      | 29610      | 29620         | 29630      | 29640      | 29650          | 29660      | 29670       | Section 306          |                  |                  |             |            |         |         |        |      |   |     |
| lambda NC_001416.1 (28510)     | C       | AATTTCTTTT | GTGGTGA    | TGTCTTCAAG | TGGAGCAT      | GAGGCA     | GACCCCTCCT | TATTG          | CTTTAATTT  | TGCTCA      | TGTAATTTAT           | GAGTG            | TCTTC            | TGCTT       |            |         |         |        |      |   |     |
| SARS-CoV-2 NC_045512.2 (22185) | C       | GCC---T    | ATTAA--TT  | TAGTGC     | TGATC---TCC   | CTCAGG     | GTTTTTCGGC | TTTAGA         | ACCATTGGT  | TAGATT      | TGCC-AA              | TAGGTAT          | TAACA            | TCAC        | T          |         |         |        |      |   |     |
|                                | (29683) | 29683      | 29690      | 29700      | 29710         | 29720      | 29730      | 29740          | 29750      | 29760       | Section 307          |                  |                  |             |            |         |         |        |      |   |     |
| lambda NC_001416.1 (28607)     | GAT     | T          | CCTCTGCT   | TGGCCAG    | GATTTTT       | TTTCGTAGCG | ATCAAGCCA  | TGAAT          | GTAACGT    | AACGGAA     | TTATCAC              | TGTTGATTC        | TGCTG            | TGCAG       | AGGCTTGTGT |         |         |        |      |   |     |
| SARS-CoV-2 NC_045512.2 (22271) | AGG     | TTTCAAA    | CTTTACTTG  | -CTTT      | TACAT--AGA    | AGTT--ATT  | TGA        | CTCCTGGTG      | ATTCTTC    | TT          | CAGGT                | TG               | GACAGC           | -TGG-TG     | CTGCA--GC  | TTAT    |         |        |      |   |     |
|                                | (29780) | 29780      | 29790      | 29800      | 29810         | 29820      | 29830      | 29840          | 29850      | 29860       | Section 308          |                  |                  |             |            |         |         |        |      |   |     |
| lambda NC_001416.1 (28704)     | T       | TGTGT      | TCC        | TGAAAA     | TAACTCA       | ATG-TTGG   | --CCGT     | ATAGCT         | TCAGT      | GATTGCGAT   | T                    | CGC-C            | TG               | TCTCT       | TGCCTA     | ATCCAA  | ACTCTTT | AC     | CCGT | C | CTT |
| SARS-CoV-2 NC_045512.2 (22359) | A       | TGT        | -GGG       | TATCT      | TCAAC         | CTAGG      | ACTTTTCTAT | TAAAA          | TAT---A    | -----       | -AT                  | GAAAA            | TG               | GAAC        | CATTAC     | AGATGCT | -GT-AG  | ACTGTG | C--- |   |     |

## SARS-CoV-2 &amp; lambda.apr

|                                |         |              |       |        |       |       |        |       |       |       |        |         |      |     |             |         |      |     |      |      |           |         |         |         |       |     |        |       |       |      |      |     |      |     |      |      |      |      |     |    |     |   |     |    |
|--------------------------------|---------|--------------|-------|--------|-------|-------|--------|-------|-------|-------|--------|---------|------|-----|-------------|---------|------|-----|------|------|-----------|---------|---------|---------|-------|-----|--------|-------|-------|------|------|-----|------|-----|------|------|------|------|-----|----|-----|---|-----|----|
|                                |         |              |       |        |       |       |        |       |       |       |        |         |      |     | Section 309 |         |      |     |      |      |           |         |         |         |       |     |        |       |       |      |      |     |      |     |      |      |      |      |     |    |     |   |     |    |
|                                | (29877) | 29877        | 29890 | 29900  | 29910 | 29920 | 29930  | 29940 | 29950 | 29960 | 29973  |         |      |     |             |         |      |     |      |      |           |         |         |         |       |     |        |       |       |      |      |     |      |     |      |      |      |      |     |    |     |   |     |    |
| lambda NC_001416.1 (28797)     |         | GGGTCCCTGTAG | CAGT  | AATA   | TCAT  | T--   | GTTT   | CTT   | AATA  | AA    | GGTT   | AGG---- | G-GG | TAA | ATCCCGGC    | GCTCATG | ACT  | TCG | C    | -    | CTTCTTCCC | AT      |         |         |       |     |        |       |       |      |      |     |      |     |      |      |      |      |     |    |     |   |     |    |
| SARS-CoV-2 NC_045512.2 (22438) |         | -----        | A     | CTTG   | ACCC  | TC    | T      | -     | CA    | GAAA  | CAA    | AGT     | GT   | AC  | GT          | TGA     | AAT  | CCT | T    | CAC  | TGT       | AGAAA-- | AAGGA-- | AT      | CT    | TAT | CAAACT | ----- | T-    |      |      |     |      |     |      |      |      |      |     |    |     |   |     |    |
|                                |         |              |       |        |       |       |        |       |       |       |        |         |      |     | Section 310 |         |      |     |      |      |           |         |         |         |       |     |        |       |       |      |      |     |      |     |      |      |      |      |     |    |     |   |     |    |
|                                | (29974) | 29974        | 29980 | 29990  | 30000 | 30010 | 30020  | 30030 | 30040 | 30050 | 30060  | 30070   |      |     |             |         |      |     |      |      |           |         |         |         |       |     |        |       |       |      |      |     |      |     |      |      |      |      |     |    |     |   |     |    |
| lambda NC_001416.1 (28885)     |         | CTGATCCT     | CTT   | CAA    | AAGG  | CC    | ACC    | TGTT  | ACT   | GGTC  | GAT    | TT      | TAA  | GT  | CA          | ACCT    | TT   | CC  | GCT  | GAT  | TCGT      | GG      | AAC     | AGA     | TACT  | CT  | CTT    | CCA   | -     | TCCT | TAA  | CC  | GGA  |     |      |      |      |      |     |    |     |   |     |    |
| SARS-CoV-2 NC_045512.2 (22509) |         | ----         | CTAA  | CTT    | TAG   | AGTC  | CA     | ACC   | AA    | -     | CA     | GAAT    | CTAT | TGT | TA          | -----   | GAT  | TT  | CC   | TAAT | --        | ATTACA  | AAC     | T--     | TGTG  | CC  | CTT    | TTGG  | ----- | TGA  |      |     |      |     |      |      |      |      |     |    |     |   |     |    |
|                                |         |              |       |        |       |       |        |       |       |       |        |         |      |     | Section 311 |         |      |     |      |      |           |         |         |         |       |     |        |       |       |      |      |     |      |     |      |      |      |      |     |    |     |   |     |    |
|                                | (30071) | 30071        | 30080 | 30090  | 30100 | 30110 | 30120  | 30130 | 30140 | 30150 | 30167  |         |      |     |             |         |      |     |      |      |           |         |         |         |       |     |        |       |       |      |      |     |      |     |      |      |      |      |     |    |     |   |     |    |
| lambda NC_001416.1 (28981)     |         | GGTGGG       | AA    | TAT    | C     | TG    | CAT    | T     | CCCG  | AAC   | CA     | T       | CG   | AC  | GAA         | CT--    | GTTT | CA  | -    | AGG  | CTT       | CT      | TG      | --      | AC    | GTC | G      | TG    | GC    | GT   | GC   | GT  | T    | CAC | TCCT | GA   | AGT  | GT   | CAA |    |     |   |     |    |
| SARS-CoV-2 NC_045512.2 (22583) |         | GT           | TTTT  | AA     | CGC   | C     | ACC    | GAT   | TT    | TG    | C      | A       | T    | -   | CTG         | TT--    | TATG | CT  | TG   | AAC  | AGGA      | AG      | AGAA    | T       | CAG   | CA  | AC     | TGT   | GT    | TG   | CT   | GAT | -    | TAT | CTG  | TCCT | AT   | ATAA | TT  | C- |     |   |     |    |
|                                |         |              |       |        |       |       |        |       |       |       |        |         |      |     | Section 312 |         |      |     |      |      |           |         |         |         |       |     |        |       |       |      |      |     |      |     |      |      |      |      |     |    |     |   |     |    |
|                                | (30168) | 30168        | 30180 | 30190  | 30200 | 30210 | 30220  | 30230 | 30240 | 30250 | 30264  |         |      |     |             |         |      |     |      |      |           |         |         |         |       |     |        |       |       |      |      |     |      |     |      |      |      |      |     |    |     |   |     |    |
| lambda NC_001416.1 (29073)     |         | GTACAT       | CGCAA | AGT    | CT    | CCG   | CA     | ATT   | A     | CAC   | G      | CA      | A    | GAA | AAA         | ACCG    | GCAT | C   | AGG  | CGGC | TT        | GGT     | GTT     | CTTT    | CAG   | T   | CTT    | CA    | AT    | TC   | GAA  | T   | ATT  | GGT | T    | ACGT | CT   |      |     |    |     |   |     |    |
| SARS-CoV-2 NC_045512.2 (22675) |         | --           | CGCAT | CATTTT | C     | A     | TTTT   | A--   | AGT   | -     | GTT    | A       | TGGA | --  | GTGT        | CT      | -    | C   | TACT | AAA  | TT        | AAAT    | -----   | GAT     | ----- | C   | T      | G     | CT    | T    | TACT | AA  | T    | GTC | -    | TA   |      |      |     |    |     |   |     |    |
|                                |         |              |       |        |       |       |        |       |       |       |        |         |      |     | Section 313 |         |      |     |      |      |           |         |         |         |       |     |        |       |       |      |      |     |      |     |      |      |      |      |     |    |     |   |     |    |
|                                | (30265) | 30265        | 30270 | 30280  | 30290 | 30300 | 30310  | 30320 | 30330 | 30340 | 30350  | 30361   |      |     |             |         |      |     |      |      |           |         |         |         |       |     |        |       |       |      |      |     |      |     |      |      |      |      |     |    |     |   |     |    |
| lambda NC_001416.1 (29170)     |         | GCAT         | GTG   | CT     | AT    | CTG   | CGCC   | ATA   | T     | CA    | T      | CC      | A    | G   | T           | CG      | GT   | AG  | TC   | GT   | TGAT      | GTT     | CT      | CCG     | CTT   | CG  | AT--   | -     | AA    | CT   | CTG  | T   | TG   | AAT | GG   | CT   | CT   | CC   | ATT | C  | ATT |   |     |    |
| SARS-CoV-2 NC_045512.2 (22750) |         | TGCA         | G     | ATTC   | ATT   | TG    | TAATT  | AG    | AG    | GT    | GAT    | -       | GAA  | GTC | AGA         | CA      | AA   | TC  | G    | CT   | CC        | AG      | GG      | C       | AA    | ACT | TGG    | -     | AA    | AG   | ATT  | G   | CT   | GAT | TAT  | AAT  | TATA | AA-- | -   | TT | A   | C | CAG |    |
|                                |         |              |       |        |       |       |        |       |       |       |        |         |      |     | Section 314 |         |      |     |      |      |           |         |         |         |       |     |        |       |       |      |      |     |      |     |      |      |      |      |     |    |     |   |     |    |
|                                | (30362) | 30362        | 30370 | 30380  | 30390 | 30400 | 30410  | 30420 | 30430 | 30440 | 30458  |         |      |     |             |         |      |     |      |      |           |         |         |         |       |     |        |       |       |      |      |     |      |     |      |      |      |      |     |    |     |   |     |    |
| lambda NC_001416.1 (29264)     |         | CTCC         | TGT   | G      | ACT   | CGGA  | AG     | TGC   | ATTT  | TAT   | CAT    | CT      | CC   | A   | TAAAA       | CA      | AA   | CC  | G    | CCG  | T         | AG      | C       | GA      | G     | TT  | CAG    | ATA   | AA    | A    | TAA  | T   | ATCC | CC  | GC   | G    | AG   | TG   | CGA | G  | GA  | T | TGT | TA |
| SARS-CoV-2 NC_045512.2 (22842) |         | AT           | GAT   | TT     | TT    | A--   | -      | CAGG  | C     | TGC   | G----- | T       | TATA | --  | GCT         | TGG     | AA   | TT  | C    | TA   | ACA       | AT      | CT      | TG----- | -     | ATT | C      | TA    | A     | G    | GT   | TG  | GT   | G   | T    | GA   | T    | TA   | TA  |    |     |   |     |    |
|                                |         |              |       |        |       |       |        |       |       |       |        |         |      |     | Section 315 |         |      |     |      |      |           |         |         |         |       |     |        |       |       |      |      |     |      |     |      |      |      |      |     |    |     |   |     |    |
|                                | (30459) | 30459        | 30470 | 30480  | 30490 | 30500 | 30510  | 30520 | 30530 | 30540 | 30555  |         |      |     |             |         |      |     |      |      |           |         |         |         |       |     |        |       |       |      |      |     |      |     |      |      |      |      |     |    |     |   |     |    |
| lambda NC_001416.1 (29361)     |         | TGTAAT       | ATT   | GGG    | TT    | TA    | AT     | CAT   | CT    | AT    | AT     | GTTTT   | TG   | TAC | AG          | AG      | AG   | GGC | AA   | GT   | AT        | CGTTT   | CC      | ACCGT   | A     | CT  | CG     | T     | GATA  | ATA  | ATTT | TG  | CAC  | GGT | AT   | C    | AG   | TCA  | -   |    |     |   |     |    |
| SARS-CoV-2 NC_045512.2 (22911) |         | -----        | ATT   | ACC    | TG    | TA    | TATA-- | -     | GAT   | TGT   | -----  | TT      | -    | AG  | GA          | AG      | TCT  | AA  | TCT  | CAA  | ACCTTTT   | T       | GAG     | AGAGAT  | ----- | -   | ATTT   | CA    | ACT   | GAA  | AT   | C   | TA   | TCA | G    |      |      |      |     |    |     |   |     |    |

## SARS-CoV-2 &amp; lambda.apr

|                                |         |                  |         |            |              |        |           |              |            |            |          |             |           |        |        |             |           |          |        |              |        |          |       |         |     |           |             |        |           |   |   |   |   |        |   |   |          |   |      |   |   |   |   |   |   |
|--------------------------------|---------|------------------|---------|------------|--------------|--------|-----------|--------------|------------|------------|----------|-------------|-----------|--------|--------|-------------|-----------|----------|--------|--------------|--------|----------|-------|---------|-----|-----------|-------------|--------|-----------|---|---|---|---|--------|---|---|----------|---|------|---|---|---|---|---|---|
|                                |         |                  |         |            |              |        |           |              |            |            |          | Section 316 |           |        |        |             |           |          |        |              |        |          |       |         |     |           |             |        |           |   |   |   |   |        |   |   |          |   |      |   |   |   |   |   |   |
|                                | (30556) | 30556            | 30570   | 30580      | 30590        | 30600  | 30610     | 30620        | 30630      | 30640      | 30652    |             |           |        |        |             |           |          |        |              |        |          |       |         |     |           |             |        |           |   |   |   |   |        |   |   |          |   |      |   |   |   |   |   |   |
| lambda NC_001416.1 (29457)     |         | TTTCTCGCACATTGCA | GAA     | TGGGGATT   | TGT          | CTTCAT | TAGACT    | TATAA        | AC         | TTCAT      | TG---    | GAA         | TAT       | TGTAT  | TGCCGA | CTCTAT      | ATCT      | AT       | ACCT   | T            | CATC   |          |       |         |     |           |             |        |           |   |   |   |   |        |   |   |          |   |      |   |   |   |   |   |   |
| SARS-CoV-2 NC_045512.2 (22985) |         | GCCGGTAGCACACCTT | GTA     | --AT-G-G   | TGT          | TGAAGG | TTTAA     | TGTT         | AC         | TTC        | TTTACA   | ATC         | AT        | TG     | GT     | TT--C       | CAACCC    | ACTA     | AT     | GGTG         | TGGT   |          |       |         |     |           |             |        |           |   |   |   |   |        |   |   |          |   |      |   |   |   |   |   |   |
|                                |         |                  |         |            |              |        |           |              |            |            |          | Section 317 |           |        |        |             |           |          |        |              |        |          |       |         |     |           |             |        |           |   |   |   |   |        |   |   |          |   |      |   |   |   |   |   |   |
|                                | (30653) | 30653            | 30660   | 30670      | 30680        | 30690  | 30700     | 30710        | 30720      | 30730      | 30749    |             |           |        |        |             |           |          |        |              |        |          |       |         |     |           |             |        |           |   |   |   |   |        |   |   |          |   |      |   |   |   |   |   |   |
| lambda NC_001416.1 (29551)     |         | TACATAA          | ACAC    | CTT        | CGTGAT       | TGTCT  | GCA       | TGGAGACAAGAC | AC         | GGAT       | CTGCA    | CA          | CATT      | GAT    | AAC    | GCCCAATCTTT | TGCTC     | AG       | CTC    | TA           | ACTCA  | TTG      |       |         |     |           |             |        |           |   |   |   |   |        |   |   |          |   |      |   |   |   |   |   |   |
| SARS-CoV-2 NC_045512.2 (23075) |         | TA---            | CC      | AAC        | CAT          | CAGAG  | TAGTA     | GTA          | CTT        | -TCTTT     | -TGA     | ACT         | TCT       | TACATG | CAC    | CA--        | GCA       | ACT      | G      | TTTGTGGACC   | TAA-AA | AGT      | C--   | TACTAAT | TTG |           |             |        |           |   |   |   |   |        |   |   |          |   |      |   |   |   |   |   |   |
|                                |         |                  |         |            |              |        |           |              |            |            |          | Section 318 |           |        |        |             |           |          |        |              |        |          |       |         |     |           |             |        |           |   |   |   |   |        |   |   |          |   |      |   |   |   |   |   |   |
|                                | (30750) | 30750            | 30760   | 30770      | 30780        | 30790  | 30800     | 30810        | 30820      | 30830      | 30846    |             |           |        |        |             |           |          |        |              |        |          |       |         |     |           |             |        |           |   |   |   |   |        |   |   |          |   |      |   |   |   |   |   |   |
| lambda NC_001416.1 (29648)     |         | ATACTCA          | TTT     | ATA        | AACTCCTTGCAA | TG     | TATGTCGTT | TCA          | GCT        | TAA        | CGG      | TATCAG      | CAA       | TG     | TTTAT  | GTA         | AAGAAACAG | TAA      | G      | ATAATAC      | TCA    | AC       | CGA   | T       |     |           |             |        |           |   |   |   |   |        |   |   |          |   |      |   |   |   |   |   |   |
| SARS-CoV-2 NC_045512.2 (23162) |         | G-----           | TTA     | AAAA       | CA-----AATG  | TG     | -----     | TCA          | AT         | TTCA       | ACT      | TCAAT       | G         | --     | TTT    | AACAG       | GCA       | CAGGT-GT | TCTT   | ACTGAG-      | TCT    | AAC      | AAA   | A       |     |           |             |        |           |   |   |   |   |        |   |   |          |   |      |   |   |   |   |   |   |
|                                |         |                  |         |            |              |        |           |              |            |            |          | Section 319 |           |        |        |             |           |          |        |              |        |          |       |         |     |           |             |        |           |   |   |   |   |        |   |   |          |   |      |   |   |   |   |   |   |
|                                | (30847) | 30847            | 30860   | 30870      | 30880        | 30890  | 30900     | 30910        | 30920      | 30930      | 30943    |             |           |        |        |             |           |          |        |              |        |          |       |         |     |           |             |        |           |   |   |   |   |        |   |   |          |   |      |   |   |   |   |   |   |
| lambda NC_001416.1 (29745)     |         | GT               | TT      | GAGTACG--  | GTC          | AT     | CAT       | CTGACACTA    | CAGA       | CT--C-TGGC | ATCGCTG  | TGA         | AG        | AC     | GA     | CGCGAA      | ---       | ATT      | CAG    | CA           | TTT--  | TCA-CAAG | CGTTA | TC      |     |           |             |        |           |   |   |   |   |        |   |   |          |   |      |   |   |   |   |   |   |
| SARS-CoV-2 NC_045512.2 (23235) |         | AG               | TT      | --TCTGCCTT | TC--         | CAACA  | ATTTG-G   | CAGA         | GACATTGCTG | ACACTAC    | TGAT     | G           | CTGT      | C      | CGTGA  | TCC         | ACAG      | ACAC     | TT     | GAGATTCTTGAC | ATT    | A        | C     | -       |     |           |             |        |           |   |   |   |   |        |   |   |          |   |      |   |   |   |   |   |   |
|                                |         |                  |         |            |              |        |           |              |            |            |          | Section 320 |           |        |        |             |           |          |        |              |        |          |       |         |     |           |             |        |           |   |   |   |   |        |   |   |          |   |      |   |   |   |   |   |   |
|                                | (30944) | 30944            | 30950   | 30960      | 30970        | 30980  | 30990     | 31000        | 31010      | 31020      | 31030    | 31040       |           |        |        |             |           |          |        |              |        |          |       |         |     |           |             |        |           |   |   |   |   |        |   |   |          |   |      |   |   |   |   |   |   |
| lambda NC_001416.1 (29831)     |         | TTTT             | AC      | AAA        | AACCGA       | TCT    | CACTCT    | T            | CCTTTGA    | TGCG       | AA       | TG          | CCAG      | CGT    | C--    | AGAC        | AT        | CA       | TATG   | CAGATACT     | TCA    | C        | TG    | CATCC   | TGA | ACCCATTGA | C           | CTCCA  |           |   |   |   |   |        |   |   |          |   |      |   |   |   |   |   |   |
| SARS-CoV-2 NC_045512.2 (23326) |         | ----             | AC      | CA         | TGTTCT       | TTT    | TGGTGG    | TG           | TCAGTG     | T          | TAT      | AA          | CA        | CCAG   | GAA    | CA          | T         | ACT      | TCTA-- | AC           | CAG--  | G        | TTG   | C       | TG  | TTC--     | TTT--AT---- | C-AGGA |           |   |   |   |   |        |   |   |          |   |      |   |   |   |   |   |   |
|                                |         |                  |         |            |              |        |           |              |            |            |          | Section 321 |           |        |        |             |           |          |        |              |        |          |       |         |     |           |             |        |           |   |   |   |   |        |   |   |          |   |      |   |   |   |   |   |   |
|                                | (31041) | 31041            | 31050   | 31060      | 31070        | 31080  | 31090     | 31100        | 31110      | 31120      | 31137    |             |           |        |        |             |           |          |        |              |        |          |       |         |     |           |             |        |           |   |   |   |   |        |   |   |          |   |      |   |   |   |   |   |   |
| lambda NC_001416.1 (29926)     |         | ACCCCGTAAT       | AGC---- | G---       | ATG          | --CG   | TAA       | T            | GATG       | TC         | GAT      | AGTTACTAA   | CGGGTC    | T      | T      | GTT         | CG        | AT       | TAA    | T            | G      | CCG      | CAG   | AAA     | CT  | CT        | TCCAGG      | TCA    | CCAG      |   |   |   |   |        |   |   |          |   |      |   |   |   |   |   |   |
| SARS-CoV-2 NC_045512.2 (23404) |         | TGTTAACTGC       | AC-AGAA | G          | TCCC         | TG     | TTGC      | TAT          | T          | CATG       | CA       | GAT         | CAACTTACT | C      | TACT   | TGG--       | CG        | TG       | TTTAT  | T            | CTA    | CAG      | GTT   | CT      | AA  | TGTTTT    | TCA         | AACA   |           |   |   |   |   |        |   |   |          |   |      |   |   |   |   |   |   |
|                                |         |                  |         |            |              |        |           |              |            |            |          | Section 322 |           |        |        |             |           |          |        |              |        |          |       |         |     |           |             |        |           |   |   |   |   |        |   |   |          |   |      |   |   |   |   |   |   |
|                                | (31138) | 31138            | 31150   | 31160      | 31170        | 31180  | 31190     | 31200        | 31210      | 31220      | 31234    |             |           |        |        |             |           |          |        |              |        |          |       |         |     |           |             |        |           |   |   |   |   |        |   |   |          |   |      |   |   |   |   |   |   |
| lambda NC_001416.1 (30014)     |         | T                | G       | CAGT       | G            | CT     | TG        | A            | TAA        | C          | AGGAGTCT | TCC--       | CAG       | G      | A      | TGGCGAA     | CAAC      | AAGA     | AACT   | GG           | T      | T        | CCGTC | T       | T   | CACGGACTT | C           | G      | TTG       | C | T | T | T | -CCAGT | T | T | A        | G | CAAT |   |   |   |   |   |   |
| SARS-CoV-2 NC_045512.2 (23498) |         | C                | G       | TGCAG      | G            | C      | TG        | T            | --TA       | -----      | T        | AGGGGCT     | G         | A      | CA     | -TGT        | CAAC      | ----     | AACT   | C            | A      | T        | A     | T       | G   | -A-G      | T           | G      | TGACATACC | C | A | T | T | G      | T | G | -CAGGTAT | T | A    | T | G | C | G | C | T |

## SARS-CoV-2 &amp; lambda.apr

|                                |         |       |       |        |        |       |       |        |       |       |       |              |         |     |         |     |      |          |           |      |      |       |       |     |    |       |             |    |      |    |      |     |    |    |    |    |    |   |   |      |       |    |     |   |    |   |   |   |   |   |   |   |   |   |   |   |   |   |   |   |   |   |   |   |   |   |   |   |   |   |   |   |   |   |   |   |   |   |   |   |   |   |   |   |   |   |   |   |   |   |   |   |   |   |   |   |   |   |   |   |   |   |   |   |   |   |   |   |   |   |   |   |   |   |   |   |   |   |   |   |   |   |   |   |   |   |   |   |   |   |   |   |   |   |   |   |   |   |   |   |   |   |   |   |   |   |   |   |   |   |   |   |   |   |   |   |   |   |   |   |   |   |   |   |   |   |   |   |   |   |   |   |   |   |   |   |   |   |   |   |   |   |   |   |   |   |   |   |   |   |   |   |   |   |   |   |   |   |   |   |   |   |   |   |   |   |   |   |   |   |   |   |   |   |   |   |   |   |   |   |   |   |   |   |   |   |   |   |   |   |   |   |   |   |   |   |   |   |   |   |   |   |   |   |   |   |   |   |   |   |   |   |   |   |   |   |   |   |   |   |   |   |   |   |   |   |   |   |   |   |   |   |   |   |   |   |   |   |   |   |   |   |   |   |   |   |   |   |   |   |   |   |   |   |   |   |   |   |   |   |   |   |   |   |   |   |   |   |   |   |   |   |   |   |   |   |   |   |   |   |   |   |   |   |   |   |   |   |   |   |   |   |   |   |   |   |   |   |   |   |   |   |   |   |   |   |   |   |   |   |   |   |   |   |   |   |   |   |   |   |   |   |   |   |   |   |   |   |   |   |   |   |   |   |   |   |   |   |   |   |   |   |   |   |   |   |   |   |   |   |   |   |   |   |   |   |   |   |   |   |   |   |   |   |   |   |   |   |   |   |   |   |   |   |   |   |   |   |   |   |   |   |   |   |   |   |   |   |   |   |   |   |   |   |   |   |   |   |   |   |   |   |   |   |   |   |   |   |   |   |   |   |   |   |   |   |   |   |   |   |   |   |   |   |   |   |   |   |   |   |   |   |   |   |   |   |   |   |   |   |   |   |   |   |   |   |   |   |   |   |   |   |   |   |   |   |   |   |   |   |   |   |   |   |   |   |   |   |   |   |   |   |   |   |   |   |   |   |   |   |   |   |   |   |   |   |   |   |   |   |   |   |   |   |   |   |   |   |   |   |   |   |   |   |   |   |   |   |   |   |   |   |   |   |   |   |   |   |   |   |   |   |   |   |   |   |   |   |   |   |   |   |   |   |   |   |   |   |   |   |   |   |   |   |   |   |   |   |   |   |   |   |   |   |   |   |   |   |   |   |   |   |   |   |   |   |   |   |   |   |   |   |   |   |   |   |   |   |   |   |   |   |   |   |   |   |   |   |   |   |   |   |   |   |   |   |   |   |   |   |   |   |   |   |   |   |   |   |   |   |   |   |   |   |   |   |   |   |   |   |   |   |   |   |   |   |   |   |   |   |   |   |   |   |   |   |   |   |   |   |   |   |   |   |   |   |   |   |   |   |   |   |   |   |   |   |   |   |   |   |   |   |   |   |   |   |   |   |   |   |   |   |   |   |   |   |   |   |   |   |   |   |   |   |   |   |   |   |   |   |   |   |   |   |   |   |   |   |   |   |   |   |   |   |   |   |   |   |   |   |   |   |   |   |   |   |   |   |   |   |   |   |   |   |   |   |   |   |   |   |   |   |   |   |   |   |   |   |   |   |   |   |   |   |   |   |   |   |   |   |   |   |   |   |   |   |   |   |   |   |   |   |   |   |   |   |   |   |   |   |   |   |   |   |   |   |   |   |   |   |   |   |   |   |   |   |   |   |   |   |   |   |   |   |   |   |   |   |   |   |   |   |   |   |   |   |   |   |   |   |   |   |   |   |   |   |   |   |   |   |   |   |   |   |   |   |   |   |   |   |   |   |   |   |   |   |   |   |   |   |   |   |   |   |   |   |   |   |   |   |   |   |   |   |   |   |   |   |   |   |   |   |   |   |   |   |   |   |   |   |   |   |   |   |   |   |   |   |   |   |   |   |   |   |   |   |   |   |   |   |   |   |   |   |   |   |   |   |   |   |   |   |   |   |   |   |   |   |   |   |   |   |   |   |   |   |   |   |   |   |   |   |   |   |   |   |   |   |   |   |   |   |   |   |   |   |   |   |   |   |   |   |   |   |   |   |   |   |   |   |   |   |   |   |   |   |   |   |   |   |   |   |   |   |   |   |   |   |   |   |   |   |   |   |   |   |   |   |   |   |   |   |   |   |   |   |   |   |   |   |   |   |   |   |   |   |   |   |   |   |   |   |   |   |   |   |   |   |   |   |   |   |   |   |   |   |   |   |   |   |   |   |   |   |   |   |   |   |   |   |   |   |   |   |   |   |   |   |   |   |   |   |   |   |   |   |   |   |   |   |   |   |   |   |   |   |   |   |   |   |   |   |   |   |   |   |   |   |   |   |   |   |   |   |   |   |   |   |   |   |   |   |   |   |   |   |   |   |   |   |   |   |   |   |   |   |   |   |   |   |   |   |   |   |   |   |   |   |   |   |   |   |   |   |   |   |   |   |
|--------------------------------|---------|-------|-------|--------|--------|-------|-------|--------|-------|-------|-------|--------------|---------|-----|---------|-----|------|----------|-----------|------|------|-------|-------|-----|----|-------|-------------|----|------|----|------|-----|----|----|----|----|----|---|---|------|-------|----|-----|---|----|---|---|---|---|---|---|---|---|---|---|---|---|---|---|---|---|---|---|---|---|---|---|---|---|---|---|---|---|---|---|---|---|---|---|---|---|---|---|---|---|---|---|---|---|---|---|---|---|---|---|---|---|---|---|---|---|---|---|---|---|---|---|---|---|---|---|---|---|---|---|---|---|---|---|---|---|---|---|---|---|---|---|---|---|---|---|---|---|---|---|---|---|---|---|---|---|---|---|---|---|---|---|---|---|---|---|---|---|---|---|---|---|---|---|---|---|---|---|---|---|---|---|---|---|---|---|---|---|---|---|---|---|---|---|---|---|---|---|---|---|---|---|---|---|---|---|---|---|---|---|---|---|---|---|---|---|---|---|---|---|---|---|---|---|---|---|---|---|---|---|---|---|---|---|---|---|---|---|---|---|---|---|---|---|---|---|---|---|---|---|---|---|---|---|---|---|---|---|---|---|---|---|---|---|---|---|---|---|---|---|---|---|---|---|---|---|---|---|---|---|---|---|---|---|---|---|---|---|---|---|---|---|---|---|---|---|---|---|---|---|---|---|---|---|---|---|---|---|---|---|---|---|---|---|---|---|---|---|---|---|---|---|---|---|---|---|---|---|---|---|---|---|---|---|---|---|---|---|---|---|---|---|---|---|---|---|---|---|---|---|---|---|---|---|---|---|---|---|---|---|---|---|---|---|---|---|---|---|---|---|---|---|---|---|---|---|---|---|---|---|---|---|---|---|---|---|---|---|---|---|---|---|---|---|---|---|---|---|---|---|---|---|---|---|---|---|---|---|---|---|---|---|---|---|---|---|---|---|---|---|---|---|---|---|---|---|---|---|---|---|---|---|---|---|---|---|---|---|---|---|---|---|---|---|---|---|---|---|---|---|---|---|---|---|---|---|---|---|---|---|---|---|---|---|---|---|---|---|---|---|---|---|---|---|---|---|---|---|---|---|---|---|---|---|---|---|---|---|---|---|---|---|---|---|---|---|---|---|---|---|---|---|---|---|---|---|---|---|---|---|---|---|---|---|---|---|---|---|---|---|---|---|---|---|---|---|---|---|---|---|---|---|---|---|---|---|---|---|---|---|---|---|---|---|---|---|---|---|---|---|---|---|---|---|---|---|---|---|---|---|---|---|---|---|---|---|---|---|---|---|---|---|---|---|---|---|---|---|---|---|---|---|---|---|---|---|---|---|---|---|---|---|---|---|---|---|---|---|---|---|---|---|---|---|---|---|---|---|---|---|---|---|---|---|---|---|---|---|---|---|---|---|---|---|---|---|---|---|---|---|---|---|---|---|---|---|---|---|---|---|---|---|---|---|---|---|---|---|---|---|---|---|---|---|---|---|---|---|---|---|---|---|---|---|---|---|---|---|---|---|---|---|---|---|---|---|---|---|---|---|---|---|---|---|---|---|---|---|---|---|---|---|---|---|---|---|---|---|---|---|---|---|---|---|---|---|---|---|---|---|---|---|---|---|---|---|---|---|---|---|---|---|---|---|---|---|---|---|---|---|---|---|---|---|---|---|---|---|---|---|---|---|---|---|---|---|---|---|---|---|---|---|---|---|---|---|---|---|---|---|---|---|---|---|---|---|---|---|---|---|---|---|---|---|---|---|---|---|---|---|---|---|---|---|---|---|---|---|---|---|---|---|---|---|---|---|---|---|---|---|---|---|---|---|---|---|---|---|---|---|---|---|---|---|---|---|---|---|---|---|---|---|---|---|---|---|---|---|---|---|---|---|---|---|---|---|---|---|---|---|---|---|---|---|---|---|---|---|---|---|---|---|---|---|---|---|---|---|---|---|---|---|---|---|---|---|---|---|---|---|---|---|---|---|---|---|---|---|---|---|---|---|---|---|---|---|---|---|---|---|---|---|---|---|---|---|---|---|---|---|---|---|---|---|---|---|---|---|---|---|---|---|---|---|---|---|---|---|---|---|---|---|---|---|---|---|---|---|---|---|---|---|---|---|---|---|---|---|---|---|---|---|---|---|---|---|---|---|---|---|---|---|---|---|---|---|---|---|---|---|---|---|---|---|---|---|---|---|---|---|---|---|---|---|---|---|---|---|---|---|---|---|---|---|---|---|---|---|---|---|---|---|---|---|---|---|---|---|---|---|---|---|---|---|---|---|---|---|---|---|---|---|---|---|---|---|---|---|---|---|---|---|---|---|---|---|---|---|---|---|---|---|---|---|---|---|---|---|---|---|---|---|---|---|---|---|---|---|---|---|---|---|---|---|---|---|---|---|---|---|---|---|---|---|---|---|---|---|---|---|---|---|---|---|---|---|---|---|---|---|---|---|---|---|---|---|---|---|---|---|---|---|---|---|---|---|---|---|---|---|---|---|---|---|---|---|---|---|---|---|---|---|---|---|---|---|---|---|---|---|---|---|---|---|---|---|---|---|---|---|---|---|---|---|---|---|---|---|---|---|---|---|---|---|---|---|---|---|---|---|---|---|---|---|---|---|---|---|---|---|---|---|---|---|---|---|---|---|---|---|---|---|---|
|                                |         |       |       |        |        |       |       |        |       |       |       | Section 323  |         |     |         |     |      |          |           |      |      |       |       |     |    |       |             |    |      |    |      |     |    |    |    |    |    |   |   |      |       |    |     |   |    |   |   |   |   |   |   |   |   |   |   |   |   |   |   |   |   |   |   |   |   |   |   |   |   |   |   |   |   |   |   |   |   |   |   |   |   |   |   |   |   |   |   |   |   |   |   |   |   |   |   |   |   |   |   |   |   |   |   |   |   |   |   |   |   |   |   |   |   |   |   |   |   |   |   |   |   |   |   |   |   |   |   |   |   |   |   |   |   |   |   |   |   |   |   |   |   |   |   |   |   |   |   |   |   |   |   |   |   |   |   |   |   |   |   |   |   |   |   |   |   |   |   |   |   |   |   |   |   |   |   |   |   |   |   |   |   |   |   |   |   |   |   |   |   |   |   |   |   |   |   |   |   |   |   |   |   |   |   |   |   |   |   |   |   |   |   |   |   |   |   |   |   |   |   |   |   |   |   |   |   |   |   |   |   |   |   |   |   |   |   |   |   |   |   |   |   |   |   |   |   |   |   |   |   |   |   |   |   |   |   |   |   |   |   |   |   |   |   |   |   |   |   |   |   |   |   |   |   |   |   |   |   |   |   |   |   |   |   |   |   |   |   |   |   |   |   |   |   |   |   |   |   |   |   |   |   |   |   |   |   |   |   |   |   |   |   |   |   |   |   |   |   |   |   |   |   |   |   |   |   |   |   |   |   |   |   |   |   |   |   |   |   |   |   |   |   |   |   |   |   |   |   |   |   |   |   |   |   |   |   |   |   |   |   |   |   |   |   |   |   |   |   |   |   |   |   |   |   |   |   |   |   |   |   |   |   |   |   |   |   |   |   |   |   |   |   |   |   |   |   |   |   |   |   |   |   |   |   |   |   |   |   |   |   |   |   |   |   |   |   |   |   |   |   |   |   |   |   |   |   |   |   |   |   |   |   |   |   |   |   |   |   |   |   |   |   |   |   |   |   |   |   |   |   |   |   |   |   |   |   |   |   |   |   |   |   |   |   |   |   |   |   |   |   |   |   |   |   |   |   |   |   |   |   |   |   |   |   |   |   |   |   |   |   |   |   |   |   |   |   |   |   |   |   |   |   |   |   |   |   |   |   |   |   |   |   |   |   |   |   |   |   |   |   |   |   |   |   |   |   |   |   |   |   |   |   |   |   |   |   |   |   |   |   |   |   |   |   |   |   |   |   |   |   |   |   |   |   |   |   |   |   |   |   |   |   |   |   |   |   |   |   |   |   |   |   |   |   |   |   |   |   |   |   |   |   |   |   |   |   |   |   |   |   |   |   |   |   |   |   |   |   |   |   |   |   |   |   |   |   |   |   |   |   |   |   |   |   |   |   |   |   |   |   |   |   |   |   |   |   |   |   |   |   |   |   |   |   |   |   |   |   |   |   |   |   |   |   |   |   |   |   |   |   |   |   |   |   |   |   |   |   |   |   |   |   |   |   |   |   |   |   |   |   |   |   |   |   |   |   |   |   |   |   |   |   |   |   |   |   |   |   |   |   |   |   |   |   |   |   |   |   |   |   |   |   |   |   |   |   |   |   |   |   |   |   |   |   |   |   |   |   |   |   |   |   |   |   |   |   |   |   |   |   |   |   |   |   |   |   |   |   |   |   |   |   |   |   |   |   |   |   |   |   |   |   |   |   |   |   |   |   |   |   |   |   |   |   |   |   |   |   |   |   |   |   |   |   |   |   |   |   |   |   |   |   |   |   |   |   |   |   |   |   |   |   |   |   |   |   |   |   |   |   |   |   |   |   |   |   |   |   |   |   |   |   |   |   |   |   |   |   |   |   |   |   |   |   |   |   |   |   |   |   |   |   |   |   |   |   |   |   |   |   |   |   |   |   |   |   |   |   |   |   |   |   |   |   |   |   |   |   |   |   |   |   |   |   |   |   |   |   |   |   |   |   |   |   |   |   |   |   |   |   |   |   |   |   |   |   |   |   |   |   |   |   |   |   |   |   |   |   |   |   |   |   |   |   |   |   |   |   |   |   |   |   |   |   |   |   |   |   |   |   |   |   |   |   |   |   |   |   |   |   |   |   |   |   |   |   |   |   |   |   |   |   |   |   |   |   |   |   |   |   |   |   |   |   |   |   |   |   |   |   |   |   |   |   |   |   |   |   |   |   |   |   |   |   |   |   |   |   |   |   |   |   |   |   |   |   |   |   |   |   |   |   |   |   |   |   |   |   |   |   |   |   |   |   |   |   |   |   |   |   |   |   |   |   |   |   |   |   |   |   |   |   |   |   |   |   |   |   |   |   |   |   |   |   |   |   |   |   |   |   |   |   |   |   |   |   |   |   |   |   |   |   |   |   |   |   |   |   |   |   |   |   |   |   |   |   |   |   |   |   |   |   |   |   |   |   |   |   |   |   |   |   |   |   |   |   |   |   |   |   |   |   |   |   |   |   |   |   |   |   |   |   |   |   |   |   |   |   |   |   |   |   |   |   |   |   |   |   |   |   |   |   |   |   |   |   |   |   |   |   |   |   |   |   |   |   |   |   |   |   |   |   |   |   |   |   |   |   |   |   |   |   |   |   |   |   |   |   |   |
|                                | (31235) | 31235 | 31240 | 31250  | 31260  | 31270 | 31280 | 31290  | 31300 | 31310 | 31320 | 31331        |         |     |         |     |      |          |           |      |      |       |       |     |    |       |             |    |      |    |      |     |    |    |    |    |    |   |   |      |       |    |     |   |    |   |   |   |   |   |   |   |   |   |   |   |   |   |   |   |   |   |   |   |   |   |   |   |   |   |   |   |   |   |   |   |   |   |   |   |   |   |   |   |   |   |   |   |   |   |   |   |   |   |   |   |   |   |   |   |   |   |   |   |   |   |   |   |   |   |   |   |   |   |   |   |   |   |   |   |   |   |   |   |   |   |   |   |   |   |   |   |   |   |   |   |   |   |   |   |   |   |   |   |   |   |   |   |   |   |   |   |   |   |   |   |   |   |   |   |   |   |   |   |   |   |   |   |   |   |   |   |   |   |   |   |   |   |   |   |   |   |   |   |   |   |   |   |   |   |   |   |   |   |   |   |   |   |   |   |   |   |   |   |   |   |   |   |   |   |   |   |   |   |   |   |   |   |   |   |   |   |   |   |   |   |   |   |   |   |   |   |   |   |   |   |   |   |   |   |   |   |   |   |   |   |   |   |   |   |   |   |   |   |   |   |   |   |   |   |   |   |   |   |   |   |   |   |   |   |   |   |   |   |   |   |   |   |   |   |   |   |   |   |   |   |   |   |   |   |   |   |   |   |   |   |   |   |   |   |   |   |   |   |   |   |   |   |   |   |   |   |   |   |   |   |   |   |   |   |   |   |   |   |   |   |   |   |   |   |   |   |   |   |   |   |   |   |   |   |   |   |   |   |   |   |   |   |   |   |   |   |   |   |   |   |   |   |   |   |   |   |   |   |   |   |   |   |   |   |   |   |   |   |   |   |   |   |   |   |   |   |   |   |   |   |   |   |   |   |   |   |   |   |   |   |   |   |   |   |   |   |   |   |   |   |   |   |   |   |   |   |   |   |   |   |   |   |   |   |   |   |   |   |   |   |   |   |   |   |   |   |   |   |   |   |   |   |   |   |   |   |   |   |   |   |   |   |   |   |   |   |   |   |   |   |   |   |   |   |   |   |   |   |   |   |   |   |   |   |   |   |   |   |   |   |   |   |   |   |   |   |   |   |   |   |   |   |   |   |   |   |   |   |   |   |   |   |   |   |   |   |   |   |   |   |   |   |   |   |   |   |   |   |   |   |   |   |   |   |   |   |   |   |   |   |   |   |   |   |   |   |   |   |   |   |   |   |   |   |   |   |   |   |   |   |   |   |   |   |   |   |   |   |   |   |   |   |   |   |   |   |   |   |   |   |   |   |   |   |   |   |   |   |   |   |   |   |   |   |   |   |   |   |   |   |   |   |   |   |   |   |   |   |   |   |   |   |   |   |   |   |   |   |   |   |   |   |   |   |   |   |   |   |   |   |   |   |   |   |   |   |   |   |   |   |   |   |   |   |   |   |   |   |   |   |   |   |   |   |   |   |   |   |   |   |   |   |   |   |   |   |   |   |   |   |   |   |   |   |   |   |   |   |   |   |   |   |   |   |   |   |   |   |   |   |   |   |   |   |   |   |   |   |   |   |   |   |   |   |   |   |   |   |   |   |   |   |   |   |   |   |   |   |   |   |   |   |   |   |   |   |   |   |   |   |   |   |   |   |   |   |   |   |   |   |   |   |   |   |   |   |   |   |   |   |   |   |   |   |   |   |   |   |   |   |   |   |   |   |   |   |   |   |   |   |   |   |   |   |   |   |   |   |   |   |   |   |   |   |   |   |   |   |   |   |   |   |   |   |   |   |   |   |   |   |   |   |   |   |   |   |   |   |   |   |   |   |   |   |   |   |   |   |   |   |   |   |   |   |   |   |   |   |   |   |   |   |   |   |   |   |   |   |   |   |   |   |   |   |   |   |   |   |   |   |   |   |   |   |   |   |   |   |   |   |   |   |   |   |   |   |   |   |   |   |   |   |   |   |   |   |   |   |   |   |   |   |   |   |   |   |   |   |   |   |   |   |   |   |   |   |   |   |   |   |   |   |   |   |   |   |   |   |   |   |   |   |   |   |   |   |   |   |   |   |   |   |   |   |   |   |   |   |   |   |   |   |   |   |   |   |   |   |   |   |   |   |   |   |   |   |   |   |   |   |   |   |   |   |   |   |   |   |   |   |   |   |   |   |   |   |   |   |   |   |   |   |   |   |   |   |   |   |   |   |   |   |   |   |   |   |   |   |   |   |   |   |   |   |   |   |   |   |   |   |   |   |   |   |   |   |   |   |   |   |   |   |   |   |   |   |   |   |   |   |   |   |   |   |   |   |   |   |   |   |   |   |   |   |   |   |   |   |   |   |   |   |   |   |   |   |   |   |   |   |   |   |   |   |   |   |   |   |   |   |   |   |   |   |   |   |   |   |   |   |   |   |   |   |   |   |   |   |   |   |   |   |   |   |   |   |   |   |   |   |   |   |   |   |   |   |   |   |   |   |   |   |   |   |   |   |   |   |   |   |   |   |   |   |   |   |   |   |   |   |   |   |   |   |   |   |   |   |   |   |   |   |   |   |   |   |   |   |   |   |   |   |   |   |   |   |   |   |   |   |   |   |   |   |   |   |   |   |   |   |   |   |   |   |   |   |   |   |   |   |   |   |
| lambda NC_001416.1 (30108)     |         | -ACGC | TTA   | CTCCCA | TCC    | GAGAT | AACAC | CT     | TCC   | TAATA | CT    | CACGCTGCTCGT | T       | GAG | TTT     | TG  | AT   | TTT      | GCTGTTTC  | A    | AGCT | CA    | ACAC  | GCA | GT | TTT   | C           | CC | TAC  |    |      |     |    |    |    |    |    |   |   |      |       |    |     |   |    |   |   |   |   |   |   |   |   |   |   |   |   |   |   |   |   |   |   |   |   |   |   |   |   |   |   |   |   |   |   |   |   |   |   |   |   |   |   |   |   |   |   |   |   |   |   |   |   |   |   |   |   |   |   |   |   |   |   |   |   |   |   |   |   |   |   |   |   |   |   |   |   |   |   |   |   |   |   |   |   |   |   |   |   |   |   |   |   |   |   |   |   |   |   |   |   |   |   |   |   |   |   |   |   |   |   |   |   |   |   |   |   |   |   |   |   |   |   |   |   |   |   |   |   |   |   |   |   |   |   |   |   |   |   |   |   |   |   |   |   |   |   |   |   |   |   |   |   |   |   |   |   |   |   |   |   |   |   |   |   |   |   |   |   |   |   |   |   |   |   |   |   |   |   |   |   |   |   |   |   |   |   |   |   |   |   |   |   |   |   |   |   |   |   |   |   |   |   |   |   |   |   |   |   |   |   |   |   |   |   |   |   |   |   |   |   |   |   |   |   |   |   |   |   |   |   |   |   |   |   |   |   |   |   |   |   |   |   |   |   |   |   |   |   |   |   |   |   |   |   |   |   |   |   |   |   |   |   |   |   |   |   |   |   |   |   |   |   |   |   |   |   |   |   |   |   |   |   |   |   |   |   |   |   |   |   |   |   |   |   |   |   |   |   |   |   |   |   |   |   |   |   |   |   |   |   |   |   |   |   |   |   |   |   |   |   |   |   |   |   |   |   |   |   |   |   |   |   |   |   |   |   |   |   |   |   |   |   |   |   |   |   |   |   |   |   |   |   |   |   |   |   |   |   |   |   |   |   |   |   |   |   |   |   |   |   |   |   |   |   |   |   |   |   |   |   |   |   |   |   |   |   |   |   |   |   |   |   |   |   |   |   |   |   |   |   |   |   |   |   |   |   |   |   |   |   |   |   |   |   |   |   |   |   |   |   |   |   |   |   |   |   |   |   |   |   |   |   |   |   |   |   |   |   |   |   |   |   |   |   |   |   |   |   |   |   |   |   |   |   |   |   |   |   |   |   |   |   |   |   |   |   |   |   |   |   |   |   |   |   |   |   |   |   |   |   |   |   |   |   |   |   |   |   |   |   |   |   |   |   |   |   |   |   |   |   |   |   |   |   |   |   |   |   |   |   |   |   |   |   |   |   |   |   |   |   |   |   |   |   |   |   |   |   |   |   |   |   |   |   |   |   |   |   |   |   |   |   |   |   |   |   |   |   |   |   |   |   |   |   |   |   |   |   |   |   |   |   |   |   |   |   |   |   |   |   |   |   |   |   |   |   |   |   |   |   |   |   |   |   |   |   |   |   |   |   |   |   |   |   |   |   |   |   |   |   |   |   |   |   |   |   |   |   |   |   |   |   |   |   |   |   |   |   |   |   |   |   |   |   |   |   |   |   |   |   |   |   |   |   |   |   |   |   |   |   |   |   |   |   |   |   |   |   |   |   |   |   |   |   |   |   |   |   |   |   |   |   |   |   |   |   |   |   |   |   |   |   |   |   |   |   |   |   |   |   |   |   |   |   |   |   |   |   |   |   |   |   |   |   |   |   |   |   |   |   |   |   |   |   |   |   |   |   |   |   |   |   |   |   |   |   |   |   |   |   |   |   |   |   |   |   |   |   |   |   |   |   |   |   |   |   |   |   |   |   |   |   |   |   |   |   |   |   |   |   |   |   |   |   |   |   |   |   |   |   |   |   |   |   |   |   |   |   |   |   |   |   |   |   |   |   |   |   |   |   |   |   |   |   |   |   |   |   |   |   |   |   |   |   |   |   |   |   |   |   |   |   |   |   |   |   |   |   |   |   |   |   |   |   |   |   |   |   |   |   |   |   |   |   |   |   |   |   |   |   |   |   |   |   |   |   |   |   |   |   |   |   |   |   |   |   |   |   |   |   |   |   |   |   |   |   |   |   |   |   |   |   |   |   |   |   |   |   |   |   |   |   |   |   |   |   |   |   |   |   |   |   |   |   |   |   |   |   |   |   |   |   |   |   |   |   |   |   |   |   |   |   |   |   |   |   |   |   |   |   |   |   |   |   |   |   |   |   |   |   |   |   |   |   |   |   |   |   |   |   |   |   |   |   |   |   |   |   |   |   |   |   |   |   |   |   |   |   |   |   |   |   |   |   |   |   |   |   |   |   |   |   |   |   |   |   |   |   |   |   |   |   |   |   |   |   |   |   |   |   |   |   |   |   |   |   |   |   |   |   |   |   |   |   |   |   |   |   |   |   |   |   |   |   |   |   |   |   |   |   |   |   |   |   |   |   |   |   |   |   |   |   |   |   |   |   |   |   |   |   |   |   |   |   |   |   |   |   |   |   |   |   |   |   |   |   |   |   |   |   |   |   |   |   |   |   |   |   |   |   |   |   |   |   |   |   |   |   |   |   |   |   |   |   |   |   |   |   |   |   |   |   |   |   |   |   |   |   |   |   |   |   |   |   |   |   |   |   |   |   |   |   |   |   |   |   |   |   |   |   |   |   |   |   |   |   |   |
| SARS-CoV-2 NC_045512.2 (23579) |         | A---  | G     | TTA    | TCAGAC | TC    | AGA   | CTA    | A     | ATTCT | C     | TCC          | GCGGG   | CA  | G       | TAG | ---- | TG       | T         | AGC  | T    | AG    | T     | CA  | T  | CCATC | ----        | A  | TTGC | CT | ACAC | TAT | GT | CA | CT | -- | TG |   |   |      |       |    |     |   |    |   |   |   |   |   |   |   |   |   |   |   |   |   |   |   |   |   |   |   |   |   |   |   |   |   |   |   |   |   |   |   |   |   |   |   |   |   |   |   |   |   |   |   |   |   |   |   |   |   |   |   |   |   |   |   |   |   |   |   |   |   |   |   |   |   |   |   |   |   |   |   |   |   |   |   |   |   |   |   |   |   |   |   |   |   |   |   |   |   |   |   |   |   |   |   |   |   |   |   |   |   |   |   |   |   |   |   |   |   |   |   |   |   |   |   |   |   |   |   |   |   |   |   |   |   |   |   |   |   |   |   |   |   |   |   |   |   |   |   |   |   |   |   |   |   |   |   |   |   |   |   |   |   |   |   |   |   |   |   |   |   |   |   |   |   |   |   |   |   |   |   |   |   |   |   |   |   |   |   |   |   |   |   |   |   |   |   |   |   |   |   |   |   |   |   |   |   |   |   |   |   |   |   |   |   |   |   |   |   |   |   |   |   |   |   |   |   |   |   |   |   |   |   |   |   |   |   |   |   |   |   |   |   |   |   |   |   |   |   |   |   |   |   |   |   |   |   |   |   |   |   |   |   |   |   |   |   |   |   |   |   |   |   |   |   |   |   |   |   |   |   |   |   |   |   |   |   |   |   |   |   |   |   |   |   |   |   |   |   |   |   |   |   |   |   |   |   |   |   |   |   |   |   |   |   |   |   |   |   |   |   |   |   |   |   |   |   |   |   |   |   |   |   |   |   |   |   |   |   |   |   |   |   |   |   |   |   |   |   |   |   |   |   |   |   |   |   |   |   |   |   |   |   |   |   |   |   |   |   |   |   |   |   |   |   |   |   |   |   |   |   |   |   |   |   |   |   |   |   |   |   |   |   |   |   |   |   |   |   |   |   |   |   |   |   |   |   |   |   |   |   |   |   |   |   |   |   |   |   |   |   |   |   |   |   |   |   |   |   |   |   |   |   |   |   |   |   |   |   |   |   |   |   |   |   |   |   |   |   |   |   |   |   |   |   |   |   |   |   |   |   |   |   |   |   |   |   |   |   |   |   |   |   |   |   |   |   |   |   |   |   |   |   |   |   |   |   |   |   |   |   |   |   |   |   |   |   |   |   |   |   |   |   |   |   |   |   |   |   |   |   |   |   |   |   |   |   |   |   |   |   |   |   |   |   |   |   |   |   |   |   |   |   |   |   |   |   |   |   |   |   |   |   |   |   |   |   |   |   |   |   |   |   |   |   |   |   |   |   |   |   |   |   |   |   |   |   |   |   |   |   |   |   |   |   |   |   |   |   |   |   |   |   |   |   |   |   |   |   |   |   |   |   |   |   |   |   |   |   |   |   |   |   |   |   |   |   |   |   |   |   |   |   |   |   |   |   |   |   |   |   |   |   |   |   |   |   |   |   |   |   |   |   |   |   |   |   |   |   |   |   |   |   |   |   |   |   |   |   |   |   |   |   |   |   |   |   |   |   |   |   |   |   |   |   |   |   |   |   |   |   |   |   |   |   |   |   |   |   |   |   |   |   |   |   |   |   |   |   |   |   |   |   |   |   |   |   |   |   |   |   |   |   |   |   |   |   |   |   |   |   |   |   |   |   |   |   |   |   |   |   |   |   |   |   |   |   |   |   |   |   |   |   |   |   |   |   |   |   |   |   |   |   |   |   |   |   |   |   |   |   |   |   |   |   |   |   |   |   |   |   |   |   |   |   |   |   |   |   |   |   |   |   |   |   |   |   |   |   |   |   |   |   |   |   |   |   |   |   |   |   |   |   |   |   |   |   |   |   |   |   |   |   |   |   |   |   |   |   |   |   |   |   |   |   |   |   |   |   |   |   |   |   |   |   |   |   |   |   |   |   |   |   |   |   |   |   |   |   |   |   |   |   |   |   |   |   |   |   |   |   |   |   |   |   |   |   |   |   |   |   |   |   |   |   |   |   |   |   |   |   |   |   |   |   |   |   |   |   |   |   |   |   |   |   |   |   |   |   |   |   |   |   |   |   |   |   |   |   |   |   |   |   |   |   |   |   |   |   |   |   |   |   |   |   |   |   |   |   |   |   |   |   |   |   |   |   |   |   |   |   |   |   |   |   |   |   |   |   |   |   |   |   |   |   |   |   |   |   |   |   |   |   |   |   |   |   |   |   |   |   |   |   |   |   |   |   |   |   |   |   |   |   |   |   |   |   |   |   |   |   |   |   |   |   |   |   |   |   |   |   |   |   |   |   |   |   |   |   |   |   |   |   |   |   |   |   |   |   |   |   |   |   |   |   |   |   |   |   |   |   |   |   |   |   |   |   |   |   |   |   |   |   |   |   |   |   |   |   |   |   |   |   |   |   |   |   |   |   |   |   |   |   |   |   |   |   |   |   |   |   |   |   |   |   |   |   |   |   |   |   |   |   |   |   |   |   |   |   |   |   |   |   |   |   |   |   |   |   |   |   |   |   |   |   |   |   |   |   |   |   |   |   |   |   |   |   |   |   |   |   |   |   |   |   |   |   |   |   |   |   |   |   |
|                                |         |       |       |        |        |       |       |        |       |       |       | Section 324  |         |     |         |     |      |          |           |      |      |       |       |     |    |       |             |    |      |    |      |     |    |    |    |    |    |   |   |      |       |    |     |   |    |   |   |   |   |   |   |   |   |   |   |   |   |   |   |   |   |   |   |   |   |   |   |   |   |   |   |   |   |   |   |   |   |   |   |   |   |   |   |   |   |   |   |   |   |   |   |   |   |   |   |   |   |   |   |   |   |   |   |   |   |   |   |   |   |   |   |   |   |   |   |   |   |   |   |   |   |   |   |   |   |   |   |   |   |   |   |   |   |   |   |   |   |   |   |   |   |   |   |   |   |   |   |   |   |   |   |   |   |   |   |   |   |   |   |   |   |   |   |   |   |   |   |   |   |   |   |   |   |   |   |   |   |   |   |   |   |   |   |   |   |   |   |   |   |   |   |   |   |   |   |   |   |   |   |   |   |   |   |   |   |   |   |   |   |   |   |   |   |   |   |   |   |   |   |   |   |   |   |   |   |   |   |   |   |   |   |   |   |   |   |   |   |   |   |   |   |   |   |   |   |   |   |   |   |   |   |   |   |   |   |   |   |   |   |   |   |   |   |   |   |   |   |   |   |   |   |   |   |   |   |   |   |   |   |   |   |   |   |   |   |   |   |   |   |   |   |   |   |   |   |   |   |   |   |   |   |   |   |   |   |   |   |   |   |   |   |   |   |   |   |   |   |   |   |   |   |   |   |   |   |   |   |   |   |   |   |   |   |   |   |   |   |   |   |   |   |   |   |   |   |   |   |   |   |   |   |   |   |   |   |   |   |   |   |   |   |   |   |   |   |   |   |   |   |   |   |   |   |   |   |   |   |   |   |   |   |   |   |   |   |   |   |   |   |   |   |   |   |   |   |   |   |   |   |   |   |   |   |   |   |   |   |   |   |   |   |   |   |   |   |   |   |   |   |   |   |   |   |   |   |   |   |   |   |   |   |   |   |   |   |   |   |   |   |   |   |   |   |   |   |   |   |   |   |   |   |   |   |   |   |   |   |   |   |   |   |   |   |   |   |   |   |   |   |   |   |   |   |   |   |   |   |   |   |   |   |   |   |   |   |   |   |   |   |   |   |   |   |   |   |   |   |   |   |   |   |   |   |   |   |   |   |   |   |   |   |   |   |   |   |   |   |   |   |   |   |   |   |   |   |   |   |   |   |   |   |   |   |   |   |   |   |   |   |   |   |   |   |   |   |   |   |   |   |   |   |   |   |   |   |   |   |   |   |   |   |   |   |   |   |   |   |   |   |   |   |   |   |   |   |   |   |   |   |   |   |   |   |   |   |   |   |   |   |   |   |   |   |   |   |   |   |   |   |   |   |   |   |   |   |   |   |   |   |   |   |   |   |   |   |   |   |   |   |   |   |   |   |   |   |   |   |   |   |   |   |   |   |   |   |   |   |   |   |   |   |   |   |   |   |   |   |   |   |   |   |   |   |   |   |   |   |   |   |   |   |   |   |   |   |   |   |   |   |   |   |   |   |   |   |   |   |   |   |   |   |   |   |   |   |   |   |   |   |   |   |   |   |   |   |   |   |   |   |   |   |   |   |   |   |   |   |   |   |   |   |   |   |   |   |   |   |   |   |   |   |   |   |   |   |   |   |   |   |   |   |   |   |   |   |   |   |   |   |   |   |   |   |   |   |   |   |   |   |   |   |   |   |   |   |   |   |   |   |   |   |   |   |   |   |   |   |   |   |   |   |   |   |   |   |   |   |   |   |   |   |   |   |   |   |   |   |   |   |   |   |   |   |   |   |   |   |   |   |   |   |   |   |   |   |   |   |   |   |   |   |   |   |   |   |   |   |   |   |   |   |   |   |   |   |   |   |   |   |   |   |   |   |   |   |   |   |   |   |   |   |   |   |   |   |   |   |   |   |   |   |   |   |   |   |   |   |   |   |   |   |   |   |   |   |   |   |   |   |   |   |   |   |   |   |   |   |   |   |   |   |   |   |   |   |   |   |   |   |   |   |   |   |   |   |   |   |   |   |   |   |   |   |   |   |   |   |   |   |   |   |   |   |   |   |   |   |   |   |   |   |   |   |   |   |   |   |   |   |   |   |   |   |   |   |   |   |   |   |   |   |   |   |   |   |   |   |   |   |   |   |   |   |   |   |   |   |   |   |   |   |   |   |   |   |   |   |   |   |   |   |   |   |   |   |   |   |   |   |   |   |   |   |   |   |   |   |   |   |   |   |   |   |   |   |   |   |   |   |   |   |   |   |   |   |   |   |   |   |   |   |   |   |   |   |   |   |   |   |   |   |   |   |   |   |   |   |   |   |   |   |   |   |   |   |   |   |   |   |   |   |   |   |   |   |   |   |   |   |   |   |   |   |   |   |   |   |   |   |   |   |   |   |   |   |   |   |   |   |   |   |   |   |   |   |   |   |   |   |   |   |   |   |   |   |   |   |   |   |   |   |   |   |   |   |   |   |   |   |   |   |   |   |   |   |   |   |   |   |   |   |   |   |   |   |   |   |   |   |   |   |   |   |   |   |   |   |   |   |   |   |   |   |   |   |   |   |   |   |   |   |   |   |   |   |   |   |   |   |   |   |   |   |   |   |   |   |   |
|                                | (31332) | 31332 | 31340 | 31350  | 31360  | 31370 | 31380 | 31390  | 31400 | 31410 | 31428 |              |         |     |         |     |      |          |           |      |      |       |       |     |    |       |             |    |      |    |      |     |    |    |    |    |    |   |   |      |       |    |     |   |    |   |   |   |   |   |   |   |   |   |   |   |   |   |   |   |   |   |   |   |   |   |   |   |   |   |   |   |   |   |   |   |   |   |   |   |   |   |   |   |   |   |   |   |   |   |   |   |   |   |   |   |   |   |   |   |   |   |   |   |   |   |   |   |   |   |   |   |   |   |   |   |   |   |   |   |   |   |   |   |   |   |   |   |   |   |   |   |   |   |   |   |   |   |   |   |   |   |   |   |   |   |   |   |   |   |   |   |   |   |   |   |   |   |   |   |   |   |   |   |   |   |   |   |   |   |   |   |   |   |   |   |   |   |   |   |   |   |   |   |   |   |   |   |   |   |   |   |   |   |   |   |   |   |   |   |   |   |   |   |   |   |   |   |   |   |   |   |   |   |   |   |   |   |   |   |   |   |   |   |   |   |   |   |   |   |   |   |   |   |   |   |   |   |   |   |   |   |   |   |   |   |   |   |   |   |   |   |   |   |   |   |   |   |   |   |   |   |   |   |   |   |   |   |   |   |   |   |   |   |   |   |   |   |   |   |   |   |   |   |   |   |   |   |   |   |   |   |   |   |   |   |   |   |   |   |   |   |   |   |   |   |   |   |   |   |   |   |   |   |   |   |   |   |   |   |   |   |   |   |   |   |   |   |   |   |   |   |   |   |   |   |   |   |   |   |   |   |   |   |   |   |   |   |   |   |   |   |   |   |   |   |   |   |   |   |   |   |   |   |   |   |   |   |   |   |   |   |   |   |   |   |   |   |   |   |   |   |   |   |   |   |   |   |   |   |   |   |   |   |   |   |   |   |   |   |   |   |   |   |   |   |   |   |   |   |   |   |   |   |   |   |   |   |   |   |   |   |   |   |   |   |   |   |   |   |   |   |   |   |   |   |   |   |   |   |   |   |   |   |   |   |   |   |   |   |   |   |   |   |   |   |   |   |   |   |   |   |   |   |   |   |   |   |   |   |   |   |   |   |   |   |   |   |   |   |   |   |   |   |   |   |   |   |   |   |   |   |   |   |   |   |   |   |   |   |   |   |   |   |   |   |   |   |   |   |   |   |   |   |   |   |   |   |   |   |   |   |   |   |   |   |   |   |   |   |   |   |   |   |   |   |   |   |   |   |   |   |   |   |   |   |   |   |   |   |   |   |   |   |   |   |   |   |   |   |   |   |   |   |   |   |   |   |   |   |   |   |   |   |   |   |   |   |   |   |   |   |   |   |   |   |   |   |   |   |   |   |   |   |   |   |   |   |   |   |   |   |   |   |   |   |   |   |   |   |   |   |   |   |   |   |   |   |   |   |   |   |   |   |   |   |   |   |   |   |   |   |   |   |   |   |   |   |   |   |   |   |   |   |   |   |   |   |   |   |   |   |   |   |   |   |   |   |   |   |   |   |   |   |   |   |   |   |   |   |   |   |   |   |   |   |   |   |   |   |   |   |   |   |   |   |   |   |   |   |   |   |   |   |   |   |   |   |   |   |   |   |   |   |   |   |   |   |   |   |   |   |   |   |   |   |   |   |   |   |   |   |   |   |   |   |   |   |   |   |   |   |   |   |   |   |   |   |   |   |   |   |   |   |   |   |   |   |   |   |   |   |   |   |   |   |   |   |   |   |   |   |   |   |   |   |   |   |   |   |   |   |   |   |   |   |   |   |   |   |   |   |   |   |   |   |   |   |   |   |   |   |   |   |   |   |   |   |   |   |   |   |   |   |   |   |   |   |   |   |   |   |   |   |   |   |   |   |   |   |   |   |   |   |   |   |   |   |   |   |   |   |   |   |   |   |   |   |   |   |   |   |   |   |   |   |   |   |   |   |   |   |   |   |   |   |   |   |   |   |   |   |   |   |   |   |   |   |   |   |   |   |   |   |   |   |   |   |   |   |   |   |   |   |   |   |   |   |   |   |   |   |   |   |   |   |   |   |   |   |   |   |   |   |   |   |   |   |   |   |   |   |   |   |   |   |   |   |   |   |   |   |   |   |   |   |   |   |   |   |   |   |   |   |   |   |   |   |   |   |   |   |   |   |   |   |   |   |   |   |   |   |   |   |   |   |   |   |   |   |   |   |   |   |   |   |   |   |   |   |   |   |   |   |   |   |   |   |   |   |   |   |   |   |   |   |   |   |   |   |   |   |   |   |   |   |   |   |   |   |   |   |   |   |   |   |   |   |   |   |   |   |   |   |   |   |   |   |   |   |   |   |   |   |   |   |   |   |   |   |   |   |   |   |   |   |   |   |   |   |   |   |   |   |   |   |   |   |   |   |   |   |   |   |   |   |   |   |   |   |   |   |   |   |   |   |   |   |   |   |   |   |   |   |   |   |   |   |   |   |   |   |   |   |   |   |   |   |   |   |   |   |   |   |   |   |   |   |   |   |   |   |   |   |   |   |   |   |   |   |   |   |   |   |   |   |   |   |   |   |   |   |   |   |   |   |   |   |   |   |   |   |   |   |   |   |   |   |   |   |   |   |   |   |   |   |   |   |   |   |   |   |   |   |   |   |   |   |
| lambda NC_001416.1 (30204)     |         | TGTT  | AG    | CGCAAT | A      | TCC   | T     | CGTTCT | CT    | CT    | GGT   | CG           | GCGGTTT | TG  | A       | T   | TGCT | T        | GGTTTCTTT | C    | CGT  | T     | CATCC | A   | G  | T     | TCCAGCACAAT | C  | G    | A  | T    | G   | T  | G  | T  | T  |    |   |   |      |       |    |     |   |    |   |   |   |   |   |   |   |   |   |   |   |   |   |   |   |   |   |   |   |   |   |   |   |   |   |   |   |   |   |   |   |   |   |   |   |   |   |   |   |   |   |   |   |   |   |   |   |   |   |   |   |   |   |   |   |   |   |   |   |   |   |   |   |   |   |   |   |   |   |   |   |   |   |   |   |   |   |   |   |   |   |   |   |   |   |   |   |   |   |   |   |   |   |   |   |   |   |   |   |   |   |   |   |   |   |   |   |   |   |   |   |   |   |   |   |   |   |   |   |   |   |   |   |   |   |   |   |   |   |   |   |   |   |   |   |   |   |   |   |   |   |   |   |   |   |   |   |   |   |   |   |   |   |   |   |   |   |   |   |   |   |   |   |   |   |   |   |   |   |   |   |   |   |   |   |   |   |   |   |   |   |   |   |   |   |   |   |   |   |   |   |   |   |   |   |   |   |   |   |   |   |   |   |   |   |   |   |   |   |   |   |   |   |   |   |   |   |   |   |   |   |   |   |   |   |   |   |   |   |   |   |   |   |   |   |   |   |   |   |   |   |   |   |   |   |   |   |   |   |   |   |   |   |   |   |   |   |   |   |   |   |   |   |   |   |   |   |   |   |   |   |   |   |   |   |   |   |   |   |   |   |   |   |   |   |   |   |   |   |   |   |   |   |   |   |   |   |   |   |   |   |   |   |   |   |   |   |   |   |   |   |   |   |   |   |   |   |   |   |   |   |   |   |   |   |   |   |   |   |   |   |   |   |   |   |   |   |   |   |   |   |   |   |   |   |   |   |   |   |   |   |   |   |   |   |   |   |   |   |   |   |   |   |   |   |   |   |   |   |   |   |   |   |   |   |   |   |   |   |   |   |   |   |   |   |   |   |   |   |   |   |   |   |   |   |   |   |   |   |   |   |   |   |   |   |   |   |   |   |   |   |   |   |   |   |   |   |   |   |   |   |   |   |   |   |   |   |   |   |   |   |   |   |   |   |   |   |   |   |   |   |   |   |   |   |   |   |   |   |   |   |   |   |   |   |   |   |   |   |   |   |   |   |   |   |   |   |   |   |   |   |   |   |   |   |   |   |   |   |   |   |   |   |   |   |   |   |   |   |   |   |   |   |   |   |   |   |   |   |   |   |   |   |   |   |   |   |   |   |   |   |   |   |   |   |   |   |   |   |   |   |   |   |   |   |   |   |   |   |   |   |   |   |   |   |   |   |   |   |   |   |   |   |   |   |   |   |   |   |   |   |   |   |   |   |   |   |   |   |   |   |   |   |   |   |   |   |   |   |   |   |   |   |   |   |   |   |   |   |   |   |   |   |   |   |   |   |   |   |   |   |   |   |   |   |   |   |   |   |   |   |   |   |   |   |   |   |   |   |   |   |   |   |   |   |   |   |   |   |   |   |   |   |   |   |   |   |   |   |   |   |   |   |   |   |   |   |   |   |   |   |   |   |   |   |   |   |   |   |   |   |   |   |   |   |   |   |   |   |   |   |   |   |   |   |   |   |   |   |   |   |   |   |   |   |   |   |   |   |   |   |   |   |   |   |   |   |   |   |   |   |   |   |   |   |   |   |   |   |   |   |   |   |   |   |   |   |   |   |   |   |   |   |   |   |   |   |   |   |   |   |   |   |   |   |   |   |   |   |   |   |   |   |   |   |   |   |   |   |   |   |   |   |   |   |   |   |   |   |   |   |   |   |   |   |   |   |   |   |   |   |   |   |   |   |   |   |   |   |   |   |   |   |   |   |   |   |   |   |   |   |   |   |   |   |   |   |   |   |   |   |   |   |   |   |   |   |   |   |   |   |   |   |   |   |   |   |   |   |   |   |   |   |   |   |   |   |   |   |   |   |   |   |   |   |   |   |   |   |   |   |   |   |   |   |   |   |   |   |   |   |   |   |   |   |   |   |   |   |   |   |   |   |   |   |   |   |   |   |   |   |   |   |   |   |   |   |   |   |   |   |   |   |   |   |   |   |   |   |   |   |   |   |   |   |   |   |   |   |   |   |   |   |   |   |   |   |   |   |   |   |   |   |   |   |   |   |   |   |   |   |   |   |   |   |   |   |   |   |   |   |   |   |   |   |   |   |   |   |   |   |   |   |   |   |   |   |   |   |   |   |   |   |   |   |   |   |   |   |   |   |   |   |   |   |   |   |   |   |   |   |   |   |   |   |   |   |   |   |   |   |   |   |   |   |   |   |   |   |   |   |   |   |   |   |   |   |   |   |   |   |   |   |   |   |   |   |   |   |   |   |   |   |   |   |   |   |   |   |   |   |   |   |   |   |   |   |   |   |   |   |   |   |   |   |   |   |   |   |   |   |   |   |   |   |   |   |   |   |   |   |   |   |   |   |   |   |   |   |   |   |   |   |   |   |   |   |   |   |   |   |   |   |   |   |   |   |   |   |   |   |   |   |   |   |   |   |   |   |   |   |   |   |   |   |   |   |   |   |   |   |   |   |   |   |   |   |   |   |   |   |   |   |   |   |   |   |   |   |   |   |   |   |
| SARS-CoV-2 NC_045512.2 (23661) |         | GTGC  | AG    | -----  | A      | AAA   | T     | T      | CAGT  | T     | G     | CT           | -       | T   | A       | CT  | C    | TAATAACT | CT        | A    | T    | TGCCA | T     | A   | CC | ----- | A           | C  | AA   | T  | TTT  | -   | T  | A  | CT | A  | T  | A | G | ---- | TGTTA | CC | ACA | G | AA | A | T |   |   |   |   |   |   |   |   |   |   |   |   |   |   |   |   |   |   |   |   |   |   |   |   |   |   |   |   |   |   |   |   |   |   |   |   |   |   |   |   |   |   |   |   |   |   |   |   |   |   |   |   |   |   |   |   |   |   |   |   |   |   |   |   |   |   |   |   |   |   |   |   |   |   |   |   |   |   |   |   |   |   |   |   |   |   |   |   |   |   |   |   |   |   |   |   |   |   |   |   |   |   |   |   |   |   |   |   |   |   |   |   |   |   |   |   |   |   |   |   |   |   |   |   |   |   |   |   |   |   |   |   |   |   |   |   |   |   |   |   |   |   |   |   |   |   |   |   |   |   |   |   |   |   |   |   |   |   |   |   |   |   |   |   |   |   |   |   |   |   |   |   |   |   |   |   |   |   |   |   |   |   |   |   |   |   |   |   |   |   |   |   |   |   |   |   |   |   |   |   |   |   |   |   |   |   |   |   |   |   |   |   |   |   |   |   |   |   |   |   |   |   |   |   |   |   |   |   |   |   |   |   |   |   |   |   |   |   |   |   |   |   |   |   |   |   |   |   |   |   |   |   |   |   |   |   |   |   |   |   |   |   |   |   |   |   |   |   |   |   |   |   |   |   |   |   |   |   |   |   |   |   |   |   |   |   |   |   |   |   |   |   |   |   |   |   |   |   |   |   |   |   |   |   |   |   |   |   |   |   |   |   |   |   |   |   |   |   |   |   |   |   |   |   |   |   |   |   |   |   |   |   |   |   |   |   |   |   |   |   |   |   |   |   |   |   |   |   |   |   |   |   |   |   |   |   |   |   |   |   |   |   |   |   |   |   |   |   |   |   |   |   |   |   |   |   |   |   |   |   |   |   |   |   |   |   |   |   |   |   |   |   |   |   |   |   |   |   |   |   |   |   |   |   |   |   |   |   |   |   |   |   |   |   |   |   |   |   |   |   |   |   |   |   |   |   |   |   |   |   |   |   |   |   |   |   |   |   |   |   |   |   |   |   |   |   |   |   |   |   |   |   |   |   |   |   |   |   |   |   |   |   |   |   |   |   |   |   |   |   |   |   |   |   |   |   |   |   |   |   |   |   |   |   |   |   |   |   |   |   |   |   |   |   |   |   |   |   |   |   |   |   |   |   |   |   |   |   |   |   |   |   |   |   |   |   |   |   |   |   |   |   |   |   |   |   |   |   |   |   |   |   |   |   |   |   |   |   |   |   |   |   |   |   |   |   |   |   |   |   |   |   |   |   |   |   |   |   |   |   |   |   |   |   |   |   |   |   |   |   |   |   |   |   |   |   |   |   |   |   |   |   |   |   |   |   |   |   |   |   |   |   |   |   |   |   |   |   |   |   |   |   |   |   |   |   |   |   |   |   |   |   |   |   |   |   |   |   |   |   |   |   |   |   |   |   |   |   |   |   |   |   |   |   |   |   |   |   |   |   |   |   |   |   |   |   |   |   |   |   |   |   |   |   |   |   |   |   |   |   |   |   |   |   |   |   |   |   |   |   |   |   |   |   |   |   |   |   |   |   |   |   |   |   |   |   |   |   |   |   |   |   |   |   |   |   |   |   |   |   |   |   |   |   |   |   |   |   |   |   |   |   |   |   |   |   |   |   |   |   |   |   |   |   |   |   |   |   |   |   |   |   |   |   |   |   |   |   |   |   |   |   |   |   |   |   |   |   |   |   |   |   |   |   |   |   |   |   |   |   |   |   |   |   |   |   |   |   |   |   |   |   |   |   |   |   |   |   |   |   |   |   |   |   |   |   |   |   |   |   |   |   |   |   |   |   |   |   |   |   |   |   |   |   |   |   |   |   |   |   |   |   |   |   |   |   |   |   |   |   |   |   |   |   |   |   |   |   |   |   |   |   |   |   |   |   |   |   |   |   |   |   |   |   |   |   |   |   |   |   |   |   |   |   |   |   |   |   |   |   |   |   |   |   |   |   |   |   |   |   |   |   |   |   |   |   |   |   |   |   |   |   |   |   |   |   |   |   |   |   |   |   |   |   |   |   |   |   |   |   |   |   |   |   |   |   |   |   |   |   |   |   |   |   |   |   |   |   |   |   |   |   |   |   |   |   |   |   |   |   |   |   |   |   |   |   |   |   |   |   |   |   |   |   |   |   |   |   |   |   |   |   |   |   |   |   |   |   |   |   |   |   |   |   |   |   |   |   |   |   |   |   |   |   |   |   |   |   |   |   |   |   |   |   |   |   |   |   |   |   |   |   |   |   |   |   |   |   |   |   |   |   |   |   |   |   |   |   |   |   |   |   |   |   |   |   |   |   |   |   |   |   |   |   |   |   |   |   |   |   |   |   |   |   |   |   |   |   |   |   |   |   |   |   |   |   |   |   |   |   |   |   |   |   |   |   |   |   |   |   |   |   |   |   |   |   |   |   |   |   |   |   |   |   |   |   |   |   |   |   |   |   |   |   |   |   |   |   |   |   |   |   |   |   |   |   |   |   |   |   |   |   |   |   |   |   |   |   |   |   |   |
|                                |         |       |       |        |        |       |       |        |       |       |       | Section 325  |         |     |         |     |      |          |           |      |      |       |       |     |    |       |             |    |      |    |      |     |    |    |    |    |    |   |   |      |       |    |     |   |    |   |   |   |   |   |   |   |   |   |   |   |   |   |   |   |   |   |   |   |   |   |   |   |   |   |   |   |   |   |   |   |   |   |   |   |   |   |   |   |   |   |   |   |   |   |   |   |   |   |   |   |   |   |   |   |   |   |   |   |   |   |   |   |   |   |   |   |   |   |   |   |   |   |   |   |   |   |   |   |   |   |   |   |   |   |   |   |   |   |   |   |   |   |   |   |   |   |   |   |   |   |   |   |   |   |   |   |   |   |   |   |   |   |   |   |   |   |   |   |   |   |   |   |   |   |   |   |   |   |   |   |   |   |   |   |   |   |   |   |   |   |   |   |   |   |   |   |   |   |   |   |   |   |   |   |   |   |   |   |   |   |   |   |   |   |   |   |   |   |   |   |   |   |   |   |   |   |   |   |   |   |   |   |   |   |   |   |   |   |   |   |   |   |   |   |   |   |   |   |   |   |   |   |   |   |   |   |   |   |   |   |   |   |   |   |   |   |   |   |   |   |   |   |   |   |   |   |   |   |   |   |   |   |   |   |   |   |   |   |   |   |   |   |   |   |   |   |   |   |   |   |   |   |   |   |   |   |   |   |   |   |   |   |   |   |   |   |   |   |   |   |   |   |   |   |   |   |   |   |   |   |   |   |   |   |   |   |   |   |   |   |   |   |   |   |   |   |   |   |   |   |   |   |   |   |   |   |   |   |   |   |   |   |   |   |   |   |   |   |   |   |   |   |   |   |   |   |   |   |   |   |   |   |   |   |   |   |   |   |   |   |   |   |   |   |   |   |   |   |   |   |   |   |   |   |   |   |   |   |   |   |   |   |   |   |   |   |   |   |   |   |   |   |   |   |   |   |   |   |   |   |   |   |   |   |   |   |   |   |   |   |   |   |   |   |   |   |   |   |   |   |   |   |   |   |   |   |   |   |   |   |   |   |   |   |   |   |   |   |   |   |   |   |   |   |   |   |   |   |   |   |   |   |   |   |   |   |   |   |   |   |   |   |   |   |   |   |   |   |   |   |   |   |   |   |   |   |   |   |   |   |   |   |   |   |   |   |   |   |   |   |   |   |   |   |   |   |   |   |   |   |   |   |   |   |   |   |   |   |   |   |   |   |   |   |   |   |   |   |   |   |   |   |   |   |   |   |   |   |   |   |   |   |   |   |   |   |   |   |   |   |   |   |   |   |   |   |   |   |   |   |   |   |   |   |   |   |   |   |   |   |   |   |   |   |   |   |   |   |   |   |   |   |   |   |   |   |   |   |   |   |   |   |   |   |   |   |   |   |   |   |   |   |   |   |   |   |   |   |   |   |   |   |   |   |   |   |   |   |   |   |   |   |   |   |   |   |   |   |   |   |   |   |   |   |   |   |   |   |   |   |   |   |   |   |   |   |   |   |   |   |   |   |   |   |   |   |   |   |   |   |   |   |   |   |   |   |   |   |   |   |   |   |   |   |   |   |   |   |   |   |   |   |   |   |   |   |   |   |   |   |   |   |   |   |   |   |   |   |   |   |   |   |   |   |   |   |   |   |   |   |   |   |   |   |   |   |   |   |   |   |   |   |   |   |   |   |   |   |   |   |   |   |   |   |   |   |   |   |   |   |   |   |   |   |   |   |   |   |   |   |   |   |   |   |   |   |   |   |   |   |   |   |   |   |   |   |   |   |   |   |   |   |   |   |   |   |   |   |   |   |   |   |   |   |   |   |   |   |   |   |   |   |   |   |   |   |   |   |   |   |   |   |   |   |   |   |   |   |   |   |   |   |   |   |   |   |   |   |   |   |   |   |   |   |   |   |   |   |   |   |   |   |   |   |   |   |   |   |   |   |   |   |   |   |   |   |   |   |   |   |   |   |   |   |   |   |   |   |   |   |   |   |   |   |   |   |   |   |   |   |   |   |   |   |   |   |   |   |   |   |   |   |   |   |   |   |   |   |   |   |   |   |   |   |   |   |   |   |   |   |   |   |   |   |   |   |   |   |   |   |   |   |   |   |   |   |   |   |   |   |   |   |   |   |   |   |   |   |   |   |   |   |   |   |   |   |   |   |   |   |   |   |   |   |   |   |   |   |   |   |   |   |   |   |   |   |   |   |   |   |   |   |   |   |   |   |   |   |   |   |   |   |   |   |   |   |   |   |   |   |   |   |   |   |   |   |   |   |   |   |   |   |   |   |   |   |   |   |   |   |   |   |   |   |   |   |   |   |   |   |   |   |   |   |   |   |   |   |   |   |   |   |   |   |   |   |   |   |   |   |   |   |   |   |   |   |   |   |   |   |   |   |   |   |   |   |   |   |   |   |   |   |   |   |   |   |   |   |   |   |   |   |   |   |   |   |   |   |   |   |   |   |   |   |   |   |   |   |   |   |   |   |   |   |   |   |   |   |   |   |   |   |   |   |   |   |   |   |   |   |   |   |   |   |   |   |   |   |   |   |   |   |   |   |   |   |   |   |   |   |   |   |   |   |   |   |   |   |   |   |   |   |   |   |   |   |   |   |   |   |   |   |
|                                | (31429) | 31429 | 31440 | 31450  | 31460  | 31470 | 31480 | 31490  | 31500 | 31510 | 31525 |              |         |     |         |     |      |          |           |      |      |       |       |     |    |       |             |    |      |    |      |     |    |    |    |    |    |   |   |      |       |    |     |   |    |   |   |   |   |   |   |   |   |   |   |   |   |   |   |   |   |   |   |   |   |   |   |   |   |   |   |   |   |   |   |   |   |   |   |   |   |   |   |   |   |   |   |   |   |   |   |   |   |   |   |   |   |   |   |   |   |   |   |   |   |   |   |   |   |   |   |   |   |   |   |   |   |   |   |   |   |   |   |   |   |   |   |   |   |   |   |   |   |   |   |   |   |   |   |   |   |   |   |   |   |   |   |   |   |   |   |   |   |   |   |   |   |   |   |   |   |   |   |   |   |   |   |   |   |   |   |   |   |   |   |   |   |   |   |   |   |   |   |   |   |   |   |   |   |   |   |   |   |   |   |   |   |   |   |   |   |   |   |   |   |   |   |   |   |   |   |   |   |   |   |   |   |   |   |   |   |   |   |   |   |   |   |   |   |   |   |   |   |   |   |   |   |   |   |   |   |   |   |   |   |   |   |   |   |   |   |   |   |   |   |   |   |   |   |   |   |   |   |   |   |   |   |   |   |   |   |   |   |   |   |   |   |   |   |   |   |   |   |   |   |   |   |   |   |   |   |   |   |   |   |   |   |   |   |   |   |   |   |   |   |   |   |   |   |   |   |   |   |   |   |   |   |   |   |   |   |   |   |   |   |   |   |   |   |   |   |   |   |   |   |   |   |   |   |   |   |   |   |   |   |   |   |   |   |   |   |   |   |   |   |   |   |   |   |   |   |   |   |   |   |   |   |   |   |   |   |   |   |   |   |   |   |   |   |   |   |   |   |   |   |   |   |   |   |   |   |   |   |   |   |   |   |   |   |   |   |   |   |   |   |   |   |   |   |   |   |   |   |   |   |   |   |   |   |   |   |   |   |   |   |   |   |   |   |   |   |   |   |   |   |   |   |   |   |   |   |   |   |   |   |   |   |   |   |   |   |   |   |   |   |   |   |   |   |   |   |   |   |   |   |   |   |   |   |   |   |   |   |   |   |   |   |   |   |   |   |   |   |   |   |   |   |   |   |   |   |   |   |   |   |   |   |   |   |   |   |   |   |   |   |   |   |   |   |   |   |   |   |   |   |   |   |   |   |   |   |   |   |   |   |   |   |   |   |   |   |   |   |   |   |   |   |   |   |   |   |   |   |   |   |   |   |   |   |   |   |   |   |   |   |   |   |   |   |   |   |   |   |   |   |   |   |   |   |   |   |   |   |   |   |   |   |   |   |   |   |   |   |   |   |   |   |   |   |   |   |   |   |   |   |   |   |   |   |   |   |   |   |   |   |   |   |   |   |   |   |   |   |   |   |   |   |   |   |   |   |   |   |   |   |   |   |   |   |   |   |   |   |   |   |   |   |   |   |   |   |   |   |   |   |   |   |   |   |   |   |   |   |   |   |   |   |   |   |   |   |   |   |   |   |   |   |   |   |   |   |   |   |   |   |   |   |   |   |   |   |   |   |   |   |   |   |   |   |   |   |   |   |   |   |   |   |   |   |   |   |   |   |   |   |   |   |   |   |   |   |   |   |   |   |   |   |   |   |   |   |   |   |   |   |   |   |   |   |   |   |   |   |   |   |   |   |   |   |   |   |   |   |   |   |   |   |   |   |   |   |   |   |   |   |   |   |   |   |   |   |   |   |   |   |   |   |   |   |   |   |   |   |   |   |   |   |   |   |   |   |   |   |   |   |   |   |   |   |   |   |   |   |   |   |   |   |   |   |   |   |   |   |   |   |   |   |   |   |   |   |   |   |   |   |   |   |   |   |   |   |   |   |   |   |   |   |   |   |   |   |   |   |   |   |   |   |   |   |   |   |   |   |   |   |   |   |   |   |   |   |   |   |   |   |   |   |   |   |   |   |   |   |   |   |   |   |   |   |   |   |   |   |   |   |   |   |   |   |   |   |   |   |   |   |   |   |   |   |   |   |   |   |   |   |   |   |   |   |   |   |   |   |   |   |   |   |   |   |   |   |   |   |   |   |   |   |   |   |   |   |   |   |   |   |   |   |   |   |   |   |   |   |   |   |   |   |   |   |   |   |   |   |   |   |   |   |   |   |   |   |   |   |   |   |   |   |   |   |   |   |   |   |   |   |   |   |   |   |   |   |   |   |   |   |   |   |   |   |   |   |   |   |   |   |   |   |   |   |   |   |   |   |   |   |   |   |   |   |   |   |   |   |   |   |   |   |   |   |   |   |   |   |   |   |   |   |   |   |   |   |   |   |   |   |   |   |   |   |   |   |   |   |   |   |   |   |   |   |   |   |   |   |   |   |   |   |   |   |   |   |   |   |   |   |   |   |   |   |   |   |   |   |   |   |   |   |   |   |   |   |   |   |   |   |   |   |   |   |   |   |   |   |   |   |   |   |   |   |   |   |   |   |   |   |   |   |   |   |   |   |   |   |   |   |   |   |   |   |   |   |   |   |   |   |   |   |   |   |   |   |   |   |   |   |   |   |   |   |   |   |   |   |   |   |   |   |   |   |   |   |   |   |   |   |   |   |   |   |   |   |   |   |   |   |   |   |   |
| lambda NC_001416.1 (30301)     |         | A     | C     | CA     | ATTCA  | TG    | GAA   | A      | AGGT  | CT    | GC    | G            | T       | CA  | AATCCCC | A   | G    | T        | CG        | ---- | T    | C     | A     | T   | G  | C     | A           | T  | T    | G  | C    | A   | T  | T  | G  | C  | T  | C | T | C    | G     | C  | T   | C | T  | C | T | C | T | C | T | C | T | C | T | C | T | C | T | C | T | C | T | C | T | C | T | C | T | C | T | C | T | C | T | C | T | C | T | C | T | C | T | C | T | C | T | C | T | C | T | C | T | C | T | C | T | C | T | C | T | C | T | C | T | C | T | C | T | C | T | C | T | C | T | C | T | C | T | C | T | C | T | C | T | C | T | C | T | C | T | C | T | C | T | C | T | C | T | C | T | C | T | C | T | C | T | C | T | C | T | C | T | C | T | C | T | C | T | C | T | C | T | C | T | C | T | C | T | C | T | C | T | C | T | C | T | C | T | C | T | C | T | C | T | C | T | C | T | C | T | C | T | C | T | C | T | C | T | C | T | C | T | C | T | C | T | C | T | C | T | C | T | C | T | C | T | C | T | C | T | C | T | C | T | C | T | C | T | C | T | C | T | C | T | C | T | C | T | C | T | C | T | C | T | C | T | C | T | C | T | C | T | C | T | C | T | C | T | C | T | C | T | C | T | C | T | C | T | C | T | C | T | C | T | C | T | C | T | C | T | C | T | C | T | C | T | C | T | C | T | C | T | C | T | C | T | C | T | C | T | C | T | C | T | C | T | C | T | C | T | C | T | C | T | C | T | C | T | C | T | C | T | C | T | C | T | C | T | C | T | C | T | C | T | C | T | C | T | C | T | C | T | C | T | C | T | C | T | C | T | C | T | C | T | C | T | C | T | C | T | C | T | C | T | C | T | C | T | C | T | C | T | C | T | C | T | C | T | C | T | C | T | C | T | C | T | C | T | C | T | C | T | C | T | C | T | C | T | C | T | C | T | C | T | C | T | C | T | C | T | C | T | C | T | C | T | C | T | C | T | C | T | C | T | C | T | C | T | C | T | C | T | C | T | C | T | C | T | C | T | C | T | C | T | C | T | C | T | C | T | C | T | C | T | C | T | C | T | C | T | C | T | C | T | C | T | C | T | C | T | C | T | C | T | C | T | C | T | C | T | C | T | C | T | C | T | C | T | C | T | C | T | C | T | C | T | C | T | C | T | C | T | C | T | C | T | C | T | C | T | C | T | C | T | C | T | C | T | C | T | C | T | C | T | C | T | C | T | C | T | C | T | C | T | C | T | C | T | C | T | C | T | C | T | C | T | C | T | C | T | C | T | C | T | C | T | C | T | C | T | C | T | C | T | C | T | C | T | C | T | C | T | C | T | C | T | C | T | C | T | C | T | C | T | C | T | C | T | C | T | C | T | C | T | C | T | C | T | C | T | C | T | C | T | C | T | C | T | C | T | C | T | C | T | C | T | C | T | C | T | C | T | C | T | C | T | C | T | C | T | C | T | C | T | C | T | C | T | C | T | C | T | C | T | C | T | C | T | C | T | C | T | C | T | C | T | C | T | C | T | C | T | C | T | C | T | C | T | C | T | C | T | C | T | C | T | C | T | C | T | C | T | C | T | C | T | C | T | C | T | C | T | C | T | C | T | C | T | C | T | C | T | C | T | C | T | C | T | C | T | C | T | C | T | C | T | C | T | C | T | C | T | C | T | C | T | C | T | C | T | C | T | C | T | C | T | C | T | C | T | C | T | C | T | C | T | C | T | C | T | C | T | C | T | C | T | C | T | C | T | C | T | C | T | C | T | C | T | C | T | C | T | C | T | C | T | C | T | C | T | C | T | C | T | C | T | C | T | C | T | C | T | C | T | C | T | C | T | C | T | C | T | C | T | C | T | C | T | C | T | C | T | C | T | C | T | C | T | C | T | C | T | C | T | C | T | C | T | C | T | C | T | C | T | C | T | C | T | C | T | C | T | C | T | C | T | C | T | C | T | C | T | C | T | C | T | C | T | C | T | C | T | C | T | C | T | C | T | C | T | C | T | C | T | C | T | C | T | C | T | C | T | C | T | C | T | C | T | C | T | C | T | C | T | C | T | C | T | C | T | C | T | C | T | C | T | C | T | C | T | C | T | C | T | C | T | C | T | C | T | C | T | C | T | C | T | C | T | C | T | C | T | C | T | C | T | C | T | C | T | C | T | C | T | C | T | C | T | C | T | C | T | C | T | C | T | C | T | C | T | C | T | C | T | C | T | C | T | C | T | C | T | C | T | C | T | C | T | C | T | C | T | C | T | C | T | C | T | C | T | C | T | C | T | C | T | C | T | C | T | C | T | C | T | C | T | C | T | C | T | C | T | C | T | C | T | C | T | C | T | C | T | C | T | C | T | C | T | C | T | C | T | C | T | C | T | C | T | C | T | C | T | C | T | C | T | C | T | C | T | C | T | C | T | C | T | C | T | C | T | C | T | C | T | C | T | C | T | C | T | C | T | C | T | C | T | C | T | C | T | C | T | C | T | C | T | C | T | C | T | C | T | C | T | C | T | C | T | C | T | C | T | C | T | C | T | C | T | C | T | C | T | C | T | C | T | C | T | C | T | C | T | C | T | C | T | C | T | C | T | C | T | C | T | C | T | C | T | C | T | C | T | C | T | C | T | C | T | C | T | C | T | C | T | C | T | C |

## SARS-CoV-2 &amp; lambda.apr

|                                |         |        |        |          |         |           |              |        |           |          |          |       |        |        |              |          |            |          |           |          |        |             |       |        |       |      |       |    |     |     |   |    |      |     |   |
|--------------------------------|---------|--------|--------|----------|---------|-----------|--------------|--------|-----------|----------|----------|-------|--------|--------|--------------|----------|------------|----------|-----------|----------|--------|-------------|-------|--------|-------|------|-------|----|-----|-----|---|----|------|-----|---|
| Section 330                    |         |        |        |          |         |           |              |        |           |          |          |       |        |        |              |          |            |          |           |          |        |             |       |        |       |      |       |    |     |     |   |    |      |     |   |
|                                | (31914) | 31914  | 31920  | 31930    | 31940   | 31950     | 31960        | 31970  | 31980     | 31990    | 32000    | 32010 |        |        |              |          |            |          |           |          |        |             |       |        |       |      |       |    |     |     |   |    |      |     |   |
| lambda NC_001416.1 (30758)     |         | AAATGA | GTCGG  | TGTGAAT  | CCATC   | AGCGT     | TACCGTT      | TCGC   | GGTGCT    | TCTTC    | AGTAC    | GCTAC | GGCA   | AAT    | GTCATCGACGTT | TTT      | ATCCG      | GAA      | ACTGCT    |          |        |             |       |        |       |      |       |    |     |     |   |    |      |     |   |
| SARS-CoV-2 NC_045512.2 (24165) |         | AAATGA | TT--G  | -----    | CTCAAT  | ACAC      | T-----       | T-CTG  | CACTGT    | TT---    | AGC-G    | GGTAC | AATC   | ACT    | TCTGTTTGGACC | TTT      | G--GT      | GCA      | G----     | G        |        |             |       |        |       |      |       |    |     |     |   |    |      |     |   |
| Section 331                    |         |        |        |          |         |           |              |        |           |          |          |       |        |        |              |          |            |          |           |          |        |             |       |        |       |      |       |    |     |     |   |    |      |     |   |
|                                | (32011) | 32011  | 32020  | 32030    | 32040   | 32050     | 32060        | 32070  | 32080     | 32090    | 32107    |       |        |        |              |          |            |          |           |          |        |             |       |        |       |      |       |    |     |     |   |    |      |     |   |
| lambda NC_001416.1 (30855)     |         | GT     | CTG    | GCTTT    | TTTTTTG | ATTT      | CAGAATT      | AGCCTG | ACG       | GGC      | AATGCT   | GCGA  | AGG    | GCGT   | TTTCCTGCTG   | AGGTGTCA | TTGAAC     | AAG      | TCCCATGTC | -GGCA    | A      |             |       |        |       |      |       |    |     |     |   |    |      |     |   |
| SARS-CoV-2 NC_045512.2 (24235) |         | TG     | CTG    | CA       | TTA--   | CAA       | ATAC         | CA     | TTTGCTATG | CA       | AAT      | GGC   | TTATAG | GTTT   | AAT          | GTA      | TTGGAGTTAC | ACAGAATG | TTCTCT    | AT       | GAGA   | ACCA        | AAAA  | ATTG   | A     |      |       |    |     |     |   |    |      |     |   |
| Section 332                    |         |        |        |          |         |           |              |        |           |          |          |       |        |        |              |          |            |          |           |          |        |             |       |        |       |      |       |    |     |     |   |    |      |     |   |
|                                | (32108) | 32108  | 32120  | 32130    | 32140   | 32150     | 32160        | 32170  | 32180     | 32190    | 32204    |       |        |        |              |          |            |          |           |          |        |             |       |        |       |      |       |    |     |     |   |    |      |     |   |
| lambda NC_001416.1 (30951)     |         | GCATA  | AGCAC  | AC-AG    | AATA    | TG-A      | AGCCCGCT     | GCCAG  | AAAA      | AAT      | GCAT     | TT    | C      | CGTGGT | TGTCAT       | ACC      | TGGT       | -TT      | CTCTC     | ATCT     | TGCTTC | TG          | CTTT  | CG     | C     | ACC  |       |    |     |     |   |    |      |     |   |
| SARS-CoV-2 NC_045512.2 (24330) |         | TTGCC  | AAC    | CA       | ATTTA   | ATAG      | TGCT         | A      | TTGGCAAA  | ATTC     | AA       | GACT  | CAC    | TTT    | C            | --TTCC   | ACAGC      | AAG      | TG        | CAC      | TT     | GGAAA       | ACT   | TCA    | AAG   | TGT  | --GGT | CA | ACC |     |   |    |      |     |   |
| Section 333                    |         |        |        |          |         |           |              |        |           |          |          |       |        |        |              |          |            |          |           |          |        |             |       |        |       |      |       |    |     |     |   |    |      |     |   |
|                                | (32205) | 32205  | 32210  | 32220    | 32230   | 32240     | 32250        | 32260  | 32270     | 32280    | 32290    | 32301 |        |        |              |          |            |          |           |          |        |             |       |        |       |      |       |    |     |     |   |    |      |     |   |
| lambda NC_001416.1 (31045)     |         | ATC    | AT     | TTC      | CAG-    | CTTT      | TGTGA        | AAAGG  | GAT       | GCGG     | CTA      | ACGTA | --TG   | AAA    | -TT          | CT       | T          | CGTC     | TG        | TTCTACTG | GT     | ATTGGCAC    | AA    | AC     | CTGAT | TT   | CA    | AT | TTG | -   |   |    |      |     |   |
| SARS-CoV-2 NC_045512.2 (24423) |         | AAA    | AT     | GCA      | CA      | AG        | CTTT         | AAAC   | ACGCT     | TG       | TAAAC    | CA    | CTTAG  | CTCC   | AA           | TT       | TT         | GGT      | TG        | CAAT     | TT     | CA          | --AGT | GT     | TT    | TAAT | GAT   | AT | C   | CTT | T | CA | CGTC | TTG | A |
| Section 334                    |         |        |        |          |         |           |              |        |           |          |          |       |        |        |              |          |            |          |           |          |        |             |       |        |       |      |       |    |     |     |   |    |      |     |   |
|                                | (32302) | 32302  | 32310  | 32320    | 32330   | 32340     | 32350        | 32360  | 32370     | 32380    | 32398    |       |        |        |              |          |            |          |           |          |        |             |       |        |       |      |       |    |     |     |   |    |      |     |   |
| lambda NC_001416.1 (31137)     |         | -AGCA  | AG     | GCTAT    | GT---   | GC        | CATCT        | TC     | GAT       | --AC     | T        | CGT   | TC     | TTA    | --CT         | CAACAG   | AAG        | -----    | ATGC      | TT       | TG     | TGCAT       | ACA   | G----- | CCC   | CT   | CGTTT |    |     |     |   |    |      |     |   |
| SARS-CoV-2 NC_045512.2 (24517) |         | C      | AAAGTT | GAGGCT   | GAAGTG  | CAAA      | T            | GAT    | AGGT      | TG-A     | TC       | AC    | AGGCAG | ACTTCA | AAG          | TTTGCAG  | ACATA      | TG       | TG        | ACTCA    | ACA    | ATTAATTAGAG | CT    | GCAG   | A     |      |       |    |     |     |   |    |      |     |   |
| Section 335                    |         |        |        |          |         |           |              |        |           |          |          |       |        |        |              |          |            |          |           |          |        |             |       |        |       |      |       |    |     |     |   |    |      |     |   |
|                                | (32399) | 32399  | 32410  | 32420    | 32430   | 32440     | 32450        | 32460  | 32470     | 32480    | 32495    |       |        |        |              |          |            |          |           |          |        |             |       |        |       |      |       |    |     |     |   |    |      |     |   |
| lambda NC_001416.1 (31211)     |         | ATT    | ATTTAT | CTCCTCA  | GC      | CAGC      | GCTG         | TGCT   | TTCA      | ----     | GTG      | GAT   | TT     | TC     | G            | ATAACAG  | AA         | GGCCGGGA | AA        | TATCC    | CAGCC  | TCGCT       | TTT   | G      | TAAC  | G    | AGT   |    |     |     |   |    |      |     |   |
| SARS-CoV-2 NC_045512.2 (24613) |         | AAT    | CA--   | GAGCTTCT | -GCT    | AAT       | CTTGC        | TGCT   | ACT       | AAAAT    | GTCA     | GAGT  | TGT    | G      | T            | ACTTGGAC | AA         | TCAAAAAG | AG        | -----    | TTG    | ATTT        | T     | TGTG   | GAA   | AG   |       |    |     |     |   |    |      |     |   |
| Section 336                    |         |        |        |          |         |           |              |        |           |          |          |       |        |        |              |          |            |          |           |          |        |             |       |        |       |      |       |    |     |     |   |    |      |     |   |
|                                | (32496) | 32496  | 32510  | 32520    | 32530   | 32540     | 32550        | 32560  | 32570     | 32580    | 32592    |       |        |        |              |          |            |          |           |          |        |             |       |        |       |      |       |    |     |     |   |    |      |     |   |
| lambda NC_001416.1 (31303)     |         | AGA    | C      | GAA      | AGTGAT  | TGCGCCT   | ACCCGGATATTA | TC     | GTG----   | AGGATGCG | T        | CAT   | CGCCAT | TG     | CT           | CC       | CAAATACAAA | ACCAATT  | T         | CAG      | C      | AGTGCCTC    |       |        |       |      |       |    |     |     |   |    |      |     |   |
| SARS-CoV-2 NC_045512.2 (24698) |         | G-G    | C--    | T        | ATCATC  | TTATGTCCT | -----        | TCCC   | TC        | AGTCAGC  | ACCTCA-- | TGGT  | G      | TAGTC  | TT           | CT       | TG         | CATGT    | -GACTT    | A        | TGTCCC | TGCA        | CA    | AGAA-- | AA    |      |       |    |     |     |   |    |      |     |   |



## SARS-CoV-2 &amp; lambda.apr

|                                |         |       |                |                |             |              |               |              |                 |               |               |                  |                   |                 |                  |            |          |
|--------------------------------|---------|-------|----------------|----------------|-------------|--------------|---------------|--------------|-----------------|---------------|---------------|------------------|-------------------|-----------------|------------------|------------|----------|
|                                |         |       |                |                |             |              |               |              |                 |               |               | Section 337      |                   |                 |                  |            |          |
|                                | (32593) | 32593 | 32600          | 32610          | 32620       | 32630        | 32640         | 32650        | 32660           | 32670         | 32689         |                  |                   |                 |                  |            |          |
| lambda NC_001416.1 (31396)     |         | GTCCA | TTTTTCGATGAACT | CCGGC          | CACGATCTCTG | TCAAACT---   | CGGCATGTACT   | TTTTC        | A--TCC----      | CGCTCAA       | TCACGACA-T    | AATGCAGGC        |                   |                 |                  |            |          |
| SARS-CoV-2 NC_045512.2 (24781) |         | -GAAC | TTTCA          | CAACT--GCTC    | CTGC        | CATT-TGTC    | ATGATG        | GAAAAG       | CACACTTTTC      | CTCGTGA       | AGGTGTCTTTGTT | TCAAATGGCACAC-AC | TG--GTT           |                 |                  |            |          |
|                                |         |       |                |                |             |              |               |              |                 |               |               | Section 338      |                   |                 |                  |            |          |
|                                | (32690) | 32690 | 32700          | 32710          | 32720       | 32730        | 32740         | 32750        | 32760           | 32770         | 32786         |                  |                   |                 |                  |            |          |
| lambda NC_001416.1 (31482)     |         | CTT   | CACGCTT        | CATACGCGGG     | TTCAT       | AGTTGGC--AA  | AGTAC         | CAGGC        | ATTTTTCGCGT     | CACCACATGCTGT | ACTGCACCTGG   | GCCAT            | GTAAAGCTGAC       |                 |                  |            |          |
| SARS-CoV-2 NC_045512.2 (24871) |         | TGTA  | ACACAA-        | AGGAATTTT      | TATGA       | AACCACAAATC  | AT            | TACTACAG     | ACAACACATTTGTGT | CTGGTA----    | ACTGTGATGTT   | GTAA-----        | TAGGA             |                 |                  |            |          |
|                                |         |       |                |                |             |              |               |              |                 |               |               | Section 339      |                   |                 |                  |            |          |
|                                | (32787) | 32787 | 32800          | 32810          | 32820       | 32830        | 32840         | 32850        | 32860           | 32870         | 32883         |                  |                   |                 |                  |            |          |
| lambda NC_001416.1 (31577)     |         | TTT   | TATGGCCT       | CGAAACCACCGAGC | CGGAAC      | TTT          | CATGAAATCCCGG | GAGGTAAAC    | CGGGCAT         | TTTC--        | AGTTCAAGGCC   | GTG              | TGCC---GTCACTGCAT | AA              |                  |            |          |
| SARS-CoV-2 NC_045512.2 (24957) |         | TT    | GTCAA          | CACAC-         | AGTTTATGAT  | CC---        | TTTGCAACCTGA  | ATTAGAC----- | TCAT            | TCAAGG        | AGG---        | AGTTAGATAA       | ATATTTTAAGAATCA   | T               |                  |            |          |
|                                |         |       |                |                |             |              |               |              |                 |               |               | Section 340      |                   |                 |                  |            |          |
|                                | (32884) | 32884 | 32890          | 32900          | 32910       | 32920        | 32930         | 32940        | 32950           | 32960         | 32970         | 32980            |                   |                 |                  |            |          |
| lambda NC_001416.1 (31669)     |         | AC    | CATC           | GGGAGA         | GCAGGCGGG   | TACGCAT      | ACT--         | TTCGTG       | CGGATAGAT       | GATCGGG       | GGATT         | CAGTAACAT        | -TCA              | CGC-CGGAAGTGAAT | TCAAACAGGGT      |            |          |
| SARS-CoV-2 NC_045512.2 (25040) |         | -A    | CATC           | ACCAGA         | -TGTTGAT    | TAGGTG       | ACATCTCT      | GCGATT       | AATGCT          | TCAGTTG       | TAAACAT       | TTCAAA           | AAGAAATTG         | ACCGCC          | TCAATGAGGTTGCCAA |            |          |
|                                |         |       |                |                |             |              |               |              |                 |               |               | Section 341      |                   |                 |                  |            |          |
|                                | (32981) | 32981 | 32990          | 33000          | 33010       | 33020        | 33030         | 33040        | 33050           | 33060         | 33077         |                  |                   |                 |                  |            |          |
| lambda NC_001416.1 (31762)     |         | TCT   | GG-CGTCGTTT    | TCGTACT        | GTTC        | CCCAGG       | CCA           | GTGCTTTAG    | CGTTA           | ACTTC         | CG-G          | AGCCACACC        | GGTG              | CAAACTCAGCA-A   | GCAGGGTGTGG      |            |          |
| SARS-CoV-2 NC_045512.2 (25135) |         | ---   | GAAT--TTAAA    | TGAATCTCT      | CACTC       | -GATCT       | CCA           | AGAAC        | TTTG            | AAAGT         | ATGAG         | CAGTATATAA       | AAATGG--          | CCATGGTACATT    | TGGCTAGGGTTT     | TA         |          |
|                                |         |       |                |                |             |              |               |              |                 |               |               | Section 342      |                   |                 |                  |            |          |
|                                | (33078) | 33078 | 33090          | 33100          | 33110       | 33120        | 33130         | 33140        | 33150           | 33160         | 33174         |                  |                   |                 |                  |            |          |
| lambda NC_001416.1 (31856)     |         | AAGTA | GGAC--         | ATT            | TTT         | CATGT-CA     | GGCCACTTCT    | TTCC         | GAGCGGGG        | TTTT          | GCTAT         | CACGTTGTGAA      | CTTCT             | GAAGCGG         | TGATGA           | CGCCGAGCCG | TTA      |
| SARS-CoV-2 NC_045512.2 (25224) |         | TAGCT | GGCTTG         | ATTGC          | CATAGTA     | AAT-GGTGACAA | TTATG         | CTTT-----    | GCTGT           | ATGACCAGTTG   | CTGTAG        | -----            | TTGTCT            | CAAGG           | CGCTGTG          | T          |          |
|                                |         |       |                |                |             |              |               |              |                 |               |               | Section 343      |                   |                 |                  |            |          |
|                                | (33175) | 33175 | 33180          | 33190          | 33200       | 33210        | 33220         | 33230        | 33240           | 33250         | 33260         | 33271            |                   |                 |                  |            |          |
| lambda NC_001416.1 (31950)     |         | A     | TTTGTGCCAC-G   | CATCAT         | CCC         | CTGTT        | CGA           | CAGCTCTC     | ACATCGAT        | CCG           | G             | TACGCTGCAGGATAA  | TGTCC             | GG-TGTC         | ATG--            | CTGCCAC    | CTTCTGTG |
| SARS-CoV-2 NC_045512.2 (25306) |         | T     | TCT-TGTGGATC   | CT--G          | CTG         | CAAA         | TTTGA         | TGAAGACG     | ACT-----        | CTGAG         | ---C          | AGT-----         | GCTCAAA           | GGAGTCA         | AATTA            | CATTACAC   | ATAAA    |

## SARS-CoV-2 &amp; lambda.apr

|                                |         |                  |                     |              |               |              |            |               |             |             |             |             |            |        |         |           |
|--------------------------------|---------|------------------|---------------------|--------------|---------------|--------------|------------|---------------|-------------|-------------|-------------|-------------|------------|--------|---------|-----------|
|                                |         |                  |                     |              |               |              |            |               |             |             |             | Section 344 |            |        |         |           |
|                                | (33272) | 33272            | 33280               | 33290        | 33300         | 33310        | 33320      | 33330         | 33340       | 33350       | 33368       |             |            |        |         |           |
| lambda NC_001416.1 (32043)     |         | CTCTGCGGCTTTCTGT | TTCTAGGA            | ATCTCAAGAG   | CTTTTACTGCTTC | GGCCTGTG     | TTCAGTT    | CTGACG        | ATGCACGA    | ATGTCGCG    | GGCGAAATA   | TC          | TGGGA      |        |         |           |
| SARS-CoV-2 NC_045512.2 (25386) |         | C                | GAACTTATGGATTTGT    | TTATGAG      | AATCTTCAC     | -----AA      | TTGGAACTGT | AA--C         | TTTGAAGCAAG | --GTGAAA    | TC          | AAGGATGCTAC | TCCTTCA    |        |         |           |
|                                |         |                  |                     |              |               |              |            |               |             |             |             | Section 345 |            |        |         |           |
|                                | (33369) | 33369            | 33380               | 33390        | 33400         | 33410        | 33420      | 33430         | 33440       | 33450       | 33465       |             |            |        |         |           |
| lambda NC_001416.1 (32139)     |         | ACAGAGC          | GGCAATAAGTCGTCATCC  | CATGTTTTATC  | CAGGGCGAT     | CAGCAGAGT    | GTTAATCTC  | CTTGCA        | TGGTTT      | CATCG--TT   | AACCGGAGT   | GAT         | GT         |        |         |           |
| SARS-CoV-2 NC_045512.2 (25471) |         | GAT-TTT          | GTTTCGCGC--TACTGCAA | CGATACCGAT   | ACAGCGCTCA    | --TCCCTT     | TCGGATGGC  | -TTAT         | TGTTGGCGTT  | GCAC        | TCTTGCT     | GT          | TTTTC      |        |         |           |
|                                |         |                  |                     |              |               |              |            |               |             |             |             | Section 346 |            |        |         |           |
|                                | (33466) | 33466            | 33480               | 33490        | 33500         | 33510        | 33520      | 33530         | 33540       | 33550       | 33562       |             |            |        |         |           |
| lambda NC_001416.1 (32234)     |         | CGCGTTCCGG       | CTGACGTTCTGCAG      | TGTATGCAGTAT | TTTCG----     | ACAATG       | CGCTCGGC   | TTCA          | TCCTTG      | TCATAGATAC  | CAGCAAA     | TCCGAAGGC   | C          |        |         |           |
| SARS-CoV-2 NC_045512.2 (25562) |         | AGAGCGCTTC       | CAAAATCATAACCC      | TCAAAAGAGAT  | GGCAACTAGC    | ACTCTCA      | AAGGTGT    | TTCA          | CTTGT       | TGCAAC      | TTGCT       | GTTGT       | TGTTTGTAAC | C      |         |           |
|                                |         |                  |                     |              |               |              |            |               |             |             |             | Section 347 |            |        |         |           |
|                                | (33563) | 33563            | 33570               | 33580        | 33590         | 33600        | 33610      | 33620         | 33630       | 33640       | 33659       |             |            |        |         |           |
| lambda NC_001416.1 (32326)     |         | AGACGGG          | CACACTGAAT          | CATGGCTTT    | TATGACGTAACA  | -----TCC     | GTTTGGGATG | CGACTGC       | CACGGC      | CCCGTGAT    | TTTCTCTGCC  | TTTCG       | CAG        | TT     | --      |           |
| SARS-CoV-2 NC_045512.2 (25659) |         | AGTT-TA          | CTCA-----           | CACCTT       | TTGCTCGTT     | -----GCTGCTG | GCCTTGAAGC | CCTTTT        | CTCTATC     | ----TT      | TATGCTTTAG  | TCTA        | CTTC       | TT     | GCA     |           |
|                                |         |                  |                     |              |               |              |            |               |             |             |             | Section 348 |            |        |         |           |
|                                | (33660) | 33660            | 33670               | 33680        | 33690         | 33700        | 33710      | 33720         | 33730       | 33740       | 33756       |             |            |        |         |           |
| lambda NC_001416.1 (32417)     |         | -TGAAT           | GGTTCGC             | GGCGCAT      | TCATCCATC-    | CATTCGGT     | AACGCAG    | ATCGGA--TGATT | ACGGT       | CCTTGCGGTAA | AATCCGGC    | ATGTAC      | AGG        | ATT    | CAT     |           |
| SARS-CoV-2 NC_045512.2 (25740) |         | GAGTAT           | AAACTTTGTAA         | GATATA       | AATAATGAGG    | CTTTGGCT     | -TTGCTG    | GAAATGCCGTTCC | AAAAA       | CCCAT---    | TACTTTATG   | ATGCCA      | ACT        | ATT    | TTC     |           |
|                                |         |                  |                     |              |               |              |            |               |             |             |             | Section 349 |            |        |         |           |
|                                | (33757) | 33757            | 33770               | 33780        | 33790         | 33800        | 33810      | 33820         | 33830       | 33840       | 33853       |             |            |        |         |           |
| lambda NC_001416.1 (32510)     |         | TGTCCT           | ---GCT              | CAAGTCCATGCC | ATCAAACT      | TGCTGGTT     | TTCAT      | TGATG         | CGGGAC      | CAGCCA      | TCAACG      | -CC         | CACCACCG   | GAACG  | ATGCCAT | TC        |
| SARS-CoV-2 NC_045512.2 (25832) |         | TTTGCT           | GGCATACT            | AAATGTTACG   | -ACTATTG      | TATACCTT     | ACAATAG    | -TGTAAC       | TTCTTCA     | ATTGTC      | -ATTACTT    | CAGGTGAT    | GGCAC      | AACAAG | TTCC    |           |
|                                |         |                  |                     |              |               |              |            |               |             |             |             | Section 350 |            |        |         |           |
|                                | (33854) | 33854            | 33860               | 33870        | 33880         | 33890        | 33900      | 33910         | 33920       | 33930       | 33940       | 33950       |            |        |         |           |
| lambda NC_001416.1 (32602)     |         | TGCTTAT          | TCAGGA              | AAAGGCGTAA   | AATTTCTT      | TCGTCC       | ACGGATTAA  | GGCCGTAC      | TGGT        | TGGCAACG    | ATCAGTAATGC | GATGA       | ACTGC      | GC     | -ATCG   | CTGGCA    |
| SARS-CoV-2 NC_045512.2 (25926) |         | TATTTCT          | TGAACATG            | ACTACCA      | AGATTGGT      | TGGT         | TATAC      | TGAAAATG      | GGAATC      | ----TGG     | AGTAAAAG    | ACTGTGTT    | GATTAC     | ACAG   | GTTA    | CTTCACTTC |

## SARS-CoV-2 &amp; lambda.apr

|                                |         |                                                                                     |                                                           |                    |                         |                           |                       |               |              |       |       |             |
|--------------------------------|---------|-------------------------------------------------------------------------------------|-----------------------------------------------------------|--------------------|-------------------------|---------------------------|-----------------------|---------------|--------------|-------|-------|-------------|
|                                |         |                                                                                     |                                                           |                    |                         |                           |                       |               |              |       |       | Section 351 |
|                                | (33951) | 33951                                                                               | 33960                                                     | 33970              | 33980                   | 33990                     | 34000                 | 34010         | 34020        | 34030 | 34047 |             |
| lambda NC_001416.1 (32698)     |         | TCACCTTTAAATGCGTCTGGCGAAGAG----                                                     | TGTGATCAGTTCCTGTGGGTTCGACAGAAATCCA-----                   | TGCCGACACGTTTCAG-- | CCAGCTT                 |                           |                       |               |              |       |       |             |
| SARS-CoV-2 NC_045512.2 (26019) |         | AGACTATT-ACCAGCTGTACTCAACTCAATTGAGTACAGACACTGGTG--TTGAACATGTTACCTTCTTCATCTACAATAAAT | TGTTGATGAGCCTG                                            |                    |                         |                           |                       |               |              |       |       |             |
|                                |         |                                                                                     |                                                           |                    |                         |                           |                       |               |              |       |       | Section 352 |
|                                | (34048) | 34048                                                                               | 34060                                                     | 34070              | 34080                   | 34090                     | 34100                 | 34110         | 34120        | 34130 | 34144 |             |
| lambda NC_001416.1 (32781)     |         | CCCAGCCAGCGTTGCGAGTGCAGTACTCATTCGTT-----                                            | TTATACCTCTGAATCAATATCAACCTGGTGGTGAGCAATGGTTTCAACCA-TGTACC |                    |                         |                           |                       |               |              |       |       |             |
| SARS-CoV-2 NC_045512.2 (26114) |         | AAGAACAATGTCCAAATTCACACAATCGACGGTTCATCCGGAGTTGTTAATCCAGTAGGAACCAATT                 | TATGATGAACCGACGACGACTACTAGCGT                             |                    |                         |                           |                       |               |              |       |       |             |
|                                |         |                                                                                     |                                                           |                    |                         |                           |                       |               |              |       |       | Section 353 |
|                                | (34145) | 34145                                                                               | 34150                                                     | 34160              | 34170                   | 34180                     | 34190                 | 34200         | 34210        | 34220 | 34241 |             |
| lambda NC_001416.1 (32872)     |         | GGATGTGTTCTTGCCATGCGCTCTGA                                                          | AAC----                                                   | TCAACATCGTCA---    | TCAAACGCACGGGTAAATGGATT | TTTTTGCTGGCCCCGTGCGGTG--  | CAA                   |               |              |       |       |             |
| SARS-CoV-2 NC_045512.2 (26211) |         | GC-----CTTGTAGACACAAGCTGATGAGTACGAACTATGTA                                          | ACTCATTCGTTTCGGAAGAGACAGGTACGT                            | TAAATAGTTAA        | TAGCGTACTTCTT           |                           |                       |               |              |       |       |             |
|                                |         |                                                                                     |                                                           |                    |                         |                           |                       |               |              |       |       | Section 354 |
|                                | (34242) | 34242                                                                               | 34250                                                     | 34260              | 34270                   | 34280                     | 34290                 | 34300         | 34310        | 34320 | 34338 |             |
| lambda NC_001416.1 (32960)     |         | ATGATCGATG-CATAGCGATTCAAACAGGTGCTGGGG-----                                          | CAGGCCTTTTTC                                              | CATGT-----         | CGTCTGCC-----           | AGTTCTGCCTCTTCTCTCTC      |                       |               |              |       |       |             |
| SARS-CoV-2 NC_045512.2 (26302) |         | TTTCTTGCTTTCTGTATCTTGCTAGTTACACTAGCCATCCTTACTGCGCTTCGAT                             | TGTGTGCGTACTGCTGCAATATTTGTTAA                             | CGTGAGTCTT         |                         |                           |                       |               |              |       |       |             |
|                                |         |                                                                                     |                                                           |                    |                         |                           |                       |               |              |       |       | Section 355 |
|                                | (34339) | 34339                                                                               | 34350                                                     | 34360              | 34370                   | 34380                     | 34390                 | 34400         | 34410        | 34420 | 34435 |             |
| lambda NC_001416.1 (33041)     |         | ACGGGCGAGCTGCTGGTA                                                                  | GTGACGCGCCAGCTCTGAGCCTCAAGACGATCCTGAATGTAA                | TA-----            | AGCGTTCATGGCTGA         | ACTCTGAAATA               |                       |               |              |       |       |             |
| SARS-CoV-2 NC_045512.2 (26398) |         | GTAAACCTTCTTTTACGT                                                                  | TTACTCTCGTGT                                              | TAAAAATCTG--       | AATTCCTCTAGAGTTCC       | TGATCTTCTGGTCTAAC--       | GAAC                  | TAAATATA      |              |       |       |             |
|                                |         |                                                                                     |                                                           |                    |                         |                           |                       |               |              |       |       | Section 356 |
|                                | (34436) | 34436                                                                               | 34450                                                     | 34460              | 34470                   | 34480                     | 34490                 | 34500         | 34510        | 34520 | 34532 |             |
| lambda NC_001416.1 (33131)     |         | G-CTGTGAAAA                                                                         | TATCGCCCGGAAATGCCGGGCTGATTAGG                             | AAAA               | CAGGA----               | AAAGGGGT                  | TAGTGAA               | TGCTTTTGCT    | TGATCTCAGTTT | CAGTA |       |             |
| SARS-CoV-2 NC_045512.2 (26490) |         | TT-AGTTTTTC                                                                         | TGTTTGGAAC                                                | -TTTAATTTTAG-----  | CCATGGCAGATTCCAACG      | TACTATTACCGT              | TGAAGAG--             | CTTAAAAA      | GCTCCTT--    |       |       |             |
|                                |         |                                                                                     |                                                           |                    |                         |                           |                       |               |              |       |       | Section 357 |
|                                | (34533) | 34533                                                                               | 34540                                                     | 34550              | 34560                   | 34570                     | 34580                 | 34590         | 34600        | 34610 | 34629 |             |
| lambda NC_001416.1 (33222)     |         | TTAAT                                                                               | ATCCATTTTTTATA                                            | AGCGTCGACGGCTTC    | ACGAAACATCTTT           | CATCGCCAATAAAAG           | TGGCGATAGTGAATTTAGTCT | GGATAGCCATAAG |              |       |       |             |
| SARS-CoV-2 NC_045512.2 (26574) |         | ---GA                                                                               | ACAATGG--AACCTAGT--                                       | AATAGGTTC          | CTATTC----              | CTTACATGGATTGTCTTCTACAATT | TGCCTATGCCAACAG--     | GAATAGGTTT    |              |       |       |             |

## SARS-CoV-2 &amp; lambda.apr

|                                |         |             |       |          |            |         |           |                  |                  |          |           |          |              |           |             |        |               |        |          |            |        |         |       |         |      |        |       |         |    |   |
|--------------------------------|---------|-------------|-------|----------|------------|---------|-----------|------------------|------------------|----------|-----------|----------|--------------|-----------|-------------|--------|---------------|--------|----------|------------|--------|---------|-------|---------|------|--------|-------|---------|----|---|
| Section 358                    |         |             |       |          |            |         |           |                  |                  |          |           |          |              |           |             |        |               |        |          |            |        |         |       |         |      |        |       |         |    |   |
|                                | (34630) | 34630       | 34640 | 34650    | 34660      | 34670   | 34680     | 34690            | 34700            | 34710    | 34726     |          |              |           |             |        |               |        |          |            |        |         |       |         |      |        |       |         |    |   |
| lambda NC_001416.1 (33319)     |         | TGT         | TTG   | ATCCAT   | TTCT       | TTGGG   | ACTCC     | TGGCTGATTA-AGTAT | GT               | CGA      | TAA       | G-GCGTT  | TCCA         | TCC-----  | GTC         | ACGTAA | TTTAC         | GG     | GTG--    | ATT        | CGT    |         |       |         |      |        |       |         |    |   |
| SARS-CoV-2 NC_045512.2 (26658) |         | TTG         | TAT   | ATAAT    | TAA        | G       | T         | ATTTT            | TCCTCTGGCTGTTATG | GC       | CAG       | TAA      | CTTTAGC      | TTGT      | TTTGTGCTT   | GCTG   | CT--G         | TTTAC  | AGAATAAA | ATT        | GGAT   |         |       |         |      |        |       |         |    |   |
| Section 359                    |         |             |       |          |            |         |           |                  |                  |          |           |          |              |           |             |        |               |        |          |            |        |         |       |         |      |        |       |         |    |   |
|                                | (34727) | 34727       | 34740 | 34750    | 34760      | 34770   | 34780     | 34790            | 34800            | 34810    | 34823     |          |              |           |             |        |               |        |          |            |        |         |       |         |      |        |       |         |    |   |
| lambda NC_001416.1 (33406)     |         | CAAGTAA     | AGATT | CGGA     | AGGGCAGCCA | GCAA    | CAG       | GCCAC            | GCTG             | CAATGGCA | TAT       | TG--     | CAT          | TGGTG     | TG          | CTC    | CTTATTTATACAT | TAA    | C        | GAAAAACGCC | TC     |         |       |         |      |        |       |         |    |   |
| SARS-CoV-2 NC_045512.2 (26750) |         | -----       | C     | AC       | CGGT       | GGA     | ATTGCTATC | GCAA             | TG               | GCTTGT   | CT        | TG       | AGGCT--      | TGA       | TG          | TGGC   | TACG          | TA     | CTT      | CA-----    | TTG    | CT----- | TCTT  | TC      |      |        |       |         |    |   |
| Section 360                    |         |             |       |          |            |         |           |                  |                  |          |           |          |              |           |             |        |               |        |          |            |        |         |       |         |      |        |       |         |    |   |
|                                | (34824) | 34824       | 34830 | 34840    | 34850      | 34860   | 34870     | 34880            | 34890            | 34900    | 34920     |          |              |           |             |        |               |        |          |            |        |         |       |         |      |        |       |         |    |   |
| lambda NC_001416.1 (33501)     |         | GAGTGAAGCGT | TAT   | TG       | GTATGCG    | GTAAAAC | GCACT     | CAGGCGGC         | CTTGAT           | AGTCAT   | ATCATCTGA | AT       | CAAATATTCCTG | AT        | GT          | AT     | CGAT          | TAT    | CG       | TAT        | CG     | GTA     |       |         |      |        |       |         |    |   |
| SARS-CoV-2 NC_045512.2 (26823) |         | AGACTG----- | TT    | TGC      | GCG-TAC    | GCG--   | TT        | CATG             | TGGTCAT--        | T        | CAATCCA   | ---      | GAA          | AA--      | CTAAC       | ATT    | TCTTCTC----   | AC     | GT       | GCC        | AC     | TCCAT   | GGC   |         |      |        |       |         |    |   |
| Section 361                    |         |             |       |          |            |         |           |                  |                  |          |           |          |              |           |             |        |               |        |          |            |        |         |       |         |      |        |       |         |    |   |
|                                | (34921) | 34921       | 34930 | 34940    | 34950      | 34960   | 34970     | 34980            | 34990            | 35000    | 35017     |          |              |           |             |        |               |        |          |            |        |         |       |         |      |        |       |         |    |   |
| lambda NC_001416.1 (33597)     |         | ATT         | CTT   | TAT      | TTC        | CTTC    | GCTAC     | CA               | TC               | CA       | TTGGAG    | GCCA     | TC           | CT        | TCCT        | GACCA  | TT---         | TCC    | ATC      | -----      | ATT    | TCCA    | GT    | CGAA    | CT   | CACACA | CA    | ACACCAT | AT | G |
| SARS-CoV-2 NC_045512.2 (26901) |         | ACT         | ATT   | CT       | TGA        | CCA-    | GACCG     | CT               | TC               | TA       | GAAAGT    | GAA      | TC           | GT        | TAATC       | GGAGC  | TGTGA         | TCC    | TC       | GTGGAC     | AT     | CTTC    | GT    | ATTG    | CT   | GGACAC | CA    | -TCTAGG | AC | G |
| Section 362                    |         |             |       |          |            |         |           |                  |                  |          |           |          |              |           |             |        |               |        |          |            |        |         |       |         |      |        |       |         |    |   |
|                                | (35018) | 35018       | 35030 | 35040    | 35050      | 35060   | 35070     | 35080            | 35090            | 35100    | 35114     |          |              |           |             |        |               |        |          |            |        |         |       |         |      |        |       |         |    |   |
| lambda NC_001416.1 (33685)     |         | CAT         | TTA   | AGTCGCTT | GAA--      | AT      | TGCTA     | TAA              | GCAGAGCA         | TG       | TT        | GCG      | CAGC         | ATGAT     | TAATAC      | AGC    | ATTTA         | AAT    | ACAGAG   | CCGT       | GTTTAT | TGAGT   | CGG   | T-      |      |        |       |         |    |   |
| SARS-CoV-2 NC_045512.2 (26996) |         | CTG         | T-G   | ACATCAAG | GACCTGCC   | TAA-    | AGAA      | ATCACTGT         | TG               | CT       | ACAT      | CA       | CGA          | ACGC      | TTTCTT      | ATT    | ACAA          | ATT    | TGGGAG-  | CTTC       | GCAGCG | TGTAG   | CAG   | GT      |      |        |       |         |    |   |
| Section 363                    |         |             |       |          |            |         |           |                  |                  |          |           |          |              |           |             |        |               |        |          |            |        |         |       |         |      |        |       |         |    |   |
|                                | (35115) | 35115       | 35120 | 35130    | 35140      | 35150   | 35160     | 35170            | 35180            | 35190    | 35211     |          |              |           |             |        |               |        |          |            |        |         |       |         |      |        |       |         |    |   |
| lambda NC_001416.1 (33778)     |         | ATTCAGA     | GT    | C        | TGA        | CAGAA   | AT        | TATTAAT          | CT               | GGT      | GAA       | GT       | TTTTT        | CT        | CTGT        | CAT    | TACGT         | CATG-- | GT       | CGATT      | CA     | ATTTT   | TA    | TTGATGC | TTT  | CA     | AGTCG |         |    |   |
| SARS-CoV-2 NC_045512.2 (27090) |         | GACTCAG     | GT    | T        | TG         | CTGC--  | AT        | TACAGTCG         | CT               | TACAG    | GAT       | TGGCAA   | CT--         | AT        | TAA         | AT     | TAAAC         | --     | ACAG     | GA         | CCATT  | C-      | AG--- | TAGC--  | AG   | TGA    | CAA   | T---    |    |   |
| Section 364                    |         |             |       |          |            |         |           |                  |                  |          |           |          |              |           |             |        |               |        |          |            |        |         |       |         |      |        |       |         |    |   |
|                                | (35212) | 35212       | 35220 | 35230    | 35240      | 35250   | 35260     | 35270            | 35280            | 35290    | 35308     |          |              |           |             |        |               |        |          |            |        |         |       |         |      |        |       |         |    |   |
| lambda NC_001416.1 (33873)     |         | TA          | AT    | CAAT     | TATG       | TAT     | TTTTT     | GAT              | GT               | TTGAC    | A         | TCTGTT   | CATATCC      | TCA       | CAGATAAAAAA | T      | CGC           | C----- | C--      | T          | CACACT | --      | GGAG  | GGC     | AA-- | AG     | AA    | GAA     |    |   |
| SARS-CoV-2 NC_045512.2 (27171) |         | --          | AT    | TGC      | TTTGC      | TTG     | TACAGT    | AA               | GT               | GAC-AA   | -----     | CAGATGTT | TCA          | TCTC----- | GT          | TGA-   | CTTTCA        | -GGT   | T        | ACTA       | TAGCAG | GAT     | A     | TTACT   | AA   | TT     |       |         |    |   |

SARS-CoV-2 & lambda.apr

<

## SARS-CoV-2 &amp; lambda.apr

|                                |         |          |              |             |           |        |            |         |               |               |                      |                  |          |        |                 |          |             |               |           |           |        |       |        |      |     |      |       |       |   |        |     |       |    |   |    |
|--------------------------------|---------|----------|--------------|-------------|-----------|--------|------------|---------|---------------|---------------|----------------------|------------------|----------|--------|-----------------|----------|-------------|---------------|-----------|-----------|--------|-------|--------|------|-----|------|-------|-------|---|--------|-----|-------|----|---|----|
|                                |         |          |              |             |           |        |            |         |               |               |                      | Section 372      |          |        |                 |          |             |               |           |           |        |       |        |      |     |      |       |       |   |        |     |       |    |   |    |
|                                | (35988) | 35988    | 36000        | 36010       | 36020     | 36030  | 36040      | 36050   | 36060         | 36070         | 36084                |                  |          |        |                 |          |             |               |           |           |        |       |        |      |     |      |       |       |   |        |     |       |    |   |    |
| lambda NC_001416.1 (34605)     |         | TGGCCTGA | ATATGT       | TTAATGA     | GAGAAATCG | GT     | ----TTCC   | TCA     | TGTGT         | G-GCAT        | GTTTTCGTC            | TTTGCTCT         | TT---    | GCATTT | TCG             | CTAGCA   | AATTAATGT   |               |           |           |        |       |        |      |     |      |       |       |   |        |     |       |    |   |    |
| SARS-CoV-2 NC_045512.2 (27863) |         | T        | CATAATGA     | A-AAC       | TTGT      | CACG   | CT         | AAACGA  | CATGAAAT      | TCT           | TGT                  | TTTCTTAG         | GAA      | TCATC  | ACAACT          | G        | TAGCTGCATTT | CAC           | CAAGAA    | TG-----   |        |       |        |      |     |      |       |       |   |        |     |       |    |   |    |
|                                |         |          |              |             |           |        |            |         |               |               |                      | Section 373      |          |        |                 |          |             |               |           |           |        |       |        |      |     |      |       |       |   |        |     |       |    |   |    |
|                                | (36085) | 36085    | 36090        | 36100       | 36110     | 36120  | 36130      | 36140   | 36150         | 36160         | 36170                | 36181            |          |        |                 |          |             |               |           |           |        |       |        |      |     |      |       |       |   |        |     |       |    |   |    |
| lambda NC_001416.1 (34694)     |         | GC       | ATCGATT      | ATCAGCTATTG | CCAGCG    | CAGAT  | ATAAG      | CGATT   | TAAG          | CTA-AGAAAACGC | ATTAAGA              | TG---            | C        | AAAACG | ATA             | AAGTGCG  | ATCAGTAA    |               |           |           |        |       |        |      |     |      |       |       |   |        |     |       |    |   |    |
| SARS-CoV-2 NC_045512.2 (27953) |         | -T       | AGTTTAC      | AGTCATGTACT | CAACAT    | CA-ACC | ATA        | TGTAG   | TTGAT         | G             | ACCCGTGTCCTATTCACTTC | T                | ATTCTA   | AA     | TGGT            | ATA      | TTAGAGT     | AGG           | AGCTA     |           |        |       |        |      |     |      |       |       |   |        |     |       |    |   |    |
|                                |         |          |              |             |           |        |            |         |               |               |                      | Section 374      |          |        |                 |          |             |               |           |           |        |       |        |      |     |      |       |       |   |        |     |       |    |   |    |
|                                | (36182) | 36182    | 36190        | 36200       | 36210     | 36220  | 36230      | 36240   | 36250         | 36260         | 36278                |                  |          |        |                 |          |             |               |           |           |        |       |        |      |     |      |       |       |   |        |     |       |    |   |    |
| lambda NC_001416.1 (34786)     |         | TTCA     | AAACCTTA     | CAG-AAG     | AGCAATC   | TATG   | TTT        | TGTGCGC | -AGCCCT       | --T           | AATGA                | AGG              | CAGGA    | AGTA   | TGTGGTTACATCAAA | ACAAT    | TCC         | CATACA        | A         |           |        |       |        |      |     |      |       |       |   |        |     |       |    |   |    |
| SARS-CoV-2 NC_045512.2 (28048) |         | G---     | AAA          | ATCAG       | CA        | CC     | TTTAATTGAA | TGTGCGT | GGATGAGGCTGGT | TCTA          | AAT                  | CA               | CC-      | CA     | TT              | AGTA     | C           | -ATCGATATCGGT | -AATTATAC | -----A    |        |       |        |      |     |      |       |       |   |        |     |       |    |   |    |
|                                |         |          |              |             |           |        |            |         |               |               |                      | Section 375      |          |        |                 |          |             |               |           |           |        |       |        |      |     |      |       |       |   |        |     |       |    |   |    |
|                                | (36279) | 36279    | 36290        | 36300       | 36310     | 36320  | 36330      | 36340   | 36350         | 36360         | 36375                |                  |          |        |                 |          |             |               |           |           |        |       |        |      |     |      |       |       |   |        |     |       |    |   |    |
| lambda NC_001416.1 (34879)     |         | T        | TAGTGAGTTGAT | TGAGCTTGGT  | TGTGTTGA  | ACAA   | AACT       | TTT     | TTCCCGAT      | GGAA          | TGGAAAGC             | AT               | ATAT     | TAT    | TCCCTAT         | TGAGGATA | TT          | TACTGGACTGA   |           |           |        |       |        |      |     |      |       |       |   |        |     |       |    |   |    |
| SARS-CoV-2 NC_045512.2 (28134) |         | G        | TTT-----C-C  | TG          | TTTACCT   | T      | -----T     | ACAA    | ----          | TT            | AATTGCCA             | GGAA             | C---     | CTAA   | AT              | TGGG     | TAG         | T---          | CT        | TGTAG     | TGCG   | TTG   | TTT    | C--- | G-- |      |       |       |   |        |     |       |    |   |    |
|                                |         |          |              |             |           |        |            |         |               |               |                      | Section 376      |          |        |                 |          |             |               |           |           |        |       |        |      |     |      |       |       |   |        |     |       |    |   |    |
|                                | (36376) | 36376    | 36390        | 36400       | 36410     | 36420  | 36430      | 36440   | 36450         | 36460         | 36472                |                  |          |        |                 |          |             |               |           |           |        |       |        |      |     |      |       |       |   |        |     |       |    |   |    |
| lambda NC_001416.1 (34976)     |         | ATTAGT   | TGCC         | AGCT        | ATGAT     | CCATA  | -TAAT      | AT      | TGAG          | -----A        | -----T               | A                | AGC      | CA     | AGGCC           | AAT      | AT          | CTAAG         | TAACTAG   | GATAAGAGG | AAT    | CGA   | TTTTTC |      |     |      |       |       |   |        |     |       |    |   |    |
| SARS-CoV-2 NC_045512.2 (28203) |         | ---      | TTC          | TATGA       | AAG-      | ACTTT  | TTT        | AGAG    | TATCAT        | GAC           | GTT                  | CGTGT            | TGTTTTAG | ATTT   | CA              | TCTAA    | ACG         | A             | CAAA      | TAA       | AAT    | GTCTG | --AT   | AAT  | G   | AG   | CCCCA |       |   |        |     |       |    |   |    |
|                                |         |          |              |             |           |        |            |         |               |               |                      | Section 377      |          |        |                 |          |             |               |           |           |        |       |        |      |     |      |       |       |   |        |     |       |    |   |    |
|                                | (36473) | 36473    | 36480        | 36490       | 36500     | 36510  | 36520      | 36530   | 36540         | 36550         | 36569                |                  |          |        |                 |          |             |               |           |           |        |       |        |      |     |      |       |       |   |        |     |       |    |   |    |
| lambda NC_001416.1 (35060)     |         | CCT      | TAA          | TTTTCTG     | GGGT      | CC     | ACTGCATGT  | TATG    | CCG           | CG----        | TTCGCCAGG            | CT               | TG       | CT     | GT              | ACCAT    | GT          | GCG           | CT        | GAT       | TCTTGC | GCTC  | AA     | TA   | CGT | T--- | GCA   |       |   |        |     |       |    |   |    |
| SARS-CoV-2 NC_045512.2 (28294) |         | AAA      | TC           | AGCGAAAT    | GCAC      | CC     | CGCATTACG  | TT      | TG            | GT            | G                    | GACCCTCAGATTCAAC | -TG--    | GCA    | ----            | GT       | AAC         | CA            | GA        | -----AT   | G      | GAG   | AA     | CG   | CAG | T    | GGG   | GC    |   |        |     |       |    |   |    |
|                                |         |          |              |             |           |        |            |         |               |               |                      | Section 378      |          |        |                 |          |             |               |           |           |        |       |        |      |     |      |       |       |   |        |     |       |    |   |    |
|                                | (36570) | 36570    | 36580        | 36590       | 36600     | 36610  | 36620      | 36630   | 36640         | 36650         | 36666                |                  |          |        |                 |          |             |               |           |           |        |       |        |      |     |      |       |       |   |        |     |       |    |   |    |
| lambda NC_001416.1 (35150)     |         | GGTT     | G            | CTTTC       | AA        | TCTGT  | TT         | TG      | TGGTATT       | CAGCC         | AG                   | C                | ACTGT    | A      | AGG             | -T       | TATC        | --            | G         | ATTTA     | GTG    | CG    | CTT    | TC   | AC  | T    | CG    | T---  | G | ATTT   | CGG | TT--- | T  | G | CG |
| SARS-CoV-2 NC_045512.2 (28379) |         | ---      | C            | GATCAA      | AA        | CAACG  | TC         | G       | CCCCAAGGTTT   | AC            | C                    | CAATA            | A        | TACTG  | C               | GTCTTG   | G           | TT            | CACC      | G         | CT     | CT    | CAC    | TC   | AC  | AT   | G     | GCAAG | G | AAGACC | TT  | AAAT  | TT | C | C  |

## SARS-CoV-2 &amp; lambda.apr

|                                |         |         |                |                |                |                |                      |                   |                  |                 |                     |                 |                 |          |                       |      |         |         |
|--------------------------------|---------|---------|----------------|----------------|----------------|----------------|----------------------|-------------------|------------------|-----------------|---------------------|-----------------|-----------------|----------|-----------------------|------|---------|---------|
|                                |         |         |                |                |                |                |                      |                   |                  |                 |                     | Section 379     |                 |          |                       |      |         |         |
|                                | (36667) | 36667   | 36680          | 36690          | 36700          | 36710          | 36720                | 36730             | 36740            | 36750           | 36763               |                 |                 |          |                       |      |         |         |
| lambda NC_001416.1 (35238)     |         | ATTTCAG | -CGAGAGAATAGGG | CGGTTAACTGGTTT | TGCGCTTACCCCA  | ACCAA          | CAGGG                | --GATT            | TTGCTGCTTTCCATT  | GAGCCTGTTTCTCT  | TGCGCGA             |                 |                 |          |                       |      |         |         |
| SARS-CoV-2 NC_045512.2 (28473) |         | CTCGAG  | GA--CAAGGCGTTC | CAAATTAACACCAA | TAGCAGTCCAGATG | ACCAA          | ATTGG                | CTACTAC           | TACCGA-----AG-AG | CTAC            | CAGACGAATT          | CG-TG           |                 |          |                       |      |         |         |
|                                |         |         |                |                |                |                |                      |                   |                  |                 |                     | Section 380     |                 |          |                       |      |         |         |
|                                | (36764) | 36764   | 36770          | 36780          | 36790          | 36800          | 36810                | 36820             | 36830            | 36840           | 36850               | 36860           |                 |          |                       |      |         |         |
| lambda NC_001416.1 (35332)     |         | CGTTTC  | GCGGCGGCGTGT   | TGTGTCATC      | CATCTGGATTCT   | CCTGT          | CAGTTAGCTTT          | TGGTGGTG          | TGTGGCAGTTT      | GTAGTCCTGAAC    | GAA-----AA          | CCCC            |                 |          |                       |      |         |         |
| SARS-CoV-2 NC_045512.2 (28560) |         | GTGGT   | GA--CGGTAAAA   | TGAAAGATC      | TCAGTCCAGA     | TGGTAT         | TTCTACTACC           | TAGGAAC           | TGGGC            | CAGAA           | GCTG--GACTT         | CCC-TATGGTGCTAA |                 |          |                       |      |         |         |
|                                |         |         |                |                |                |                |                      |                   |                  |                 |                     | Section 381     |                 |          |                       |      |         |         |
|                                | (36861) | 36861   | 36870          | 36880          | 36890          | 36900          | 36910                | 36920             | 36930            | 36940           | 36957               |                 |                 |          |                       |      |         |         |
| lambda NC_001416.1 (35424)     |         | CCGC    | GAT--TGGCACAT  | TGGCAGCTAA     | TCCGGAATCG     | CAC            | TACGGCAATGCTTCGTTTCG | TATCAC            | CACCCCA          | AAGCCTTCT       | GCTTTG              | AATGC-          |                 |          |                       |      |         |         |
| SARS-CoV-2 NC_045512.2 (28651) |         | CAAA    | GACGGCAT       | CATATGGTT      | GC-AACTGA      | GGAGCCTTGA-ATA | CACAAAAGATC          | CAT               | TGGCAC           | C               | G----CAATCCTGCT     | AAC---AATGCT    |                 |          |                       |      |         |         |
|                                |         |         |                |                |                |                |                      |                   |                  |                 |                     | Section 382     |                 |          |                       |      |         |         |
|                                | (36958) | 36958   | 36970          | 36980          | 36990          | 37000          | 37010                | 37020             | 37030            | 37040           | 37054               |                 |                 |          |                       |      |         |         |
| lambda NC_001416.1 (35518)     |         | -TGCC   | CTTCTTC--AGGG  | CTTAA-TTTTT    | AAGAGC         | GTCA           | CCTTCATGGTGG         | TCAGTGC           | GTCTGCT          | GATGTGCTCAGTATC | ACCGCCAGTGGTATTT    |                 |                 |          |                       |      |         |         |
| SARS-CoV-2 NC_045512.2 (28739) |         | GCAAT   | CGTGC          | TACA           | ACTTCTCA       | AGGAACAA       | CATTGCA              | -----AAAG         | GCTCTC           | TACGC           | AG--AAGG-----GAGCAG | AGGCGGC-----    |                 |          |                       |      |         |         |
|                                |         |         |                |                |                |                |                      |                   |                  |                 |                     | Section 383     |                 |          |                       |      |         |         |
|                                | (37055) | 37055   | 37060          | 37070          | 37080          | 37090          | 37100                | 37110             | 37120            | 37130           | 37140               | 37151           |                 |          |                       |      |         |         |
| lambda NC_001416.1 (35611)     |         | ATGTC   | AACACCGC--     | CAGAGATAATT    | TATCACCGC      | CAGATGGTT      | ATCTGT               | ATGTTTTTTATATGAAT | TTATTTT          | TTTG            | CAGGGG              | GGCATTGTTTG     | GTAG            |          |                       |      |         |         |
| SARS-CoV-2 NC_045512.2 (28811) |         | AGTCA   | A---G          | CCTCTTCTC      | GT             | TCC--TCATCA    | CGT                  | AG-TCGC-AA        | CAGTTCAAGAA----- | ATTCAACT        | T--C--CA            | GGCAG--CA       | GTAG            |          |                       |      |         |         |
|                                |         |         |                |                |                |                |                      |                   |                  |                 |                     | Section 384     |                 |          |                       |      |         |         |
|                                | (37152) | 37152   | 37160          | 37170          | 37180          | 37190          | 37200                | 37210             | 37220            | 37230           | 37248               |                 |                 |          |                       |      |         |         |
| lambda NC_001416.1 (35706)     |         | GT      | GAGATCTGA-ATT  | GCTATGTT       | TAGTGA         | TTG            | TATCTATTT            | ---T              | CAATAAA          | TACAAT--        | TGGTTATGTGTTTT      | TGGGGGCG        | ATCGTGA         |          |                       |      |         |         |
| SARS-CoV-2 NC_045512.2 (28882) |         | GGGA    | ACTTCTCCTGC    | TAG            | AATGCT         | TGGCAAT        | GGCG                 | GTGA              | TGCTGCT          | -CTTGC          | TTTGCTGCT           | TGCTT-GACA      | GATTGAACCAGCTTT | GAGCAAAA | TGT                   |      |         |         |
|                                |         |         |                |                |                |                |                      |                   |                  |                 |                     | Section 385     |                 |          |                       |      |         |         |
|                                | (37249) | 37249   | 37260          | 37270          | 37280          | 37290          | 37300                | 37310             | 37320            | 37330           | 37345               |                 |                 |          |                       |      |         |         |
| lambda NC_001416.1 (35796)     |         | --      | GGCAAAG        | AAAACCCGGCGCTG | AGGC           | CGG            | GTTATT               | CTTGT             | TCT              | CTGGTC          | AAATT               | ATATAG          | TTG--GAAAA      | CAAGGAT  | -GCATATATG            | AA   | TGAACGA |         |
| SARS-CoV-2 NC_045512.2 (28977) |         | CT      | GGT            | AAAG           | GCC-----       | AACA           | CAAC                 | CAAG              | G---C            | AAACT           | TG                  | CA--CT          | AA              | GAAATCT  | TGCTGCTGAGGCTTCTAAGAA | GCCT | CGGCAAA | AACGTAC |

SARS-CoV-2 & lambda.apr

|                                |           |             |              |             |         |          |          |              |          |           |           |
|--------------------------------|-----------|-------------|--------------|-------------|---------|----------|----------|--------------|----------|-----------|-----------|
|                                |           | Section 386 |              |             |         |          |          |              |          |           |           |
| (37346)                        | 37346     | 37360       | 37370        | 37380       | 37390   | 37400    | 37410    | 37420        | 37430    | 37442     |           |
| lambda NC_001416.1 (35888)     | TGCAGAGGC | AATGC       | CGATGGC      | GATAGTGGG   | TATCAT  | GTAGCCGC | TATGCT   | GGAAAGAAG    | CAA-T    | AACCCGCAG | GAA       |
| SARS-CoV-2 NC_045512.2 (29062) | TGC-C     | A-CTAA      | GCATACAAT    | GTAACACAAGC | TTTC    | GCAGACG  | TGGT     | CCAGAACAAACC | CAAGG    | AAATTTTG  | GGG       |
|                                |           | Section 387 |              |             |         |          |          |              |          |           |           |
| (37443)                        | 37443     | 37450       | 37460        | 37470       | 37480   | 37490    | 37500    | 37510        | 37520    | 37539     |           |
| lambda NC_001416.1 (35984)     | AAAACTA   | AGGGCAT     | AGACAATAACT  | ACCGATGT    | CA--    | TATACCC  | ATACTCT  | TAATCTTGG    | C        | CAGTCGGC  | G         |
| SARS-CoV-2 NC_045512.2 (29157) | GAA-CT    | GATTACA     | AACATTGGCCGC | AAATTGCA    | CAAT    | TGCC     | CCC      | CAGGG        | GG-TT    | CA-GCGTT  | C         |
|                                |           | Section 388 |              |             |         |          |          |              |          |           |           |
| (37540)                        | 37540     | 37550       | 37560        | 37570       | 37580   | 37590    | 37600    | 37610        | 37620    | 37636     |           |
| lambda NC_001416.1 (36077)     | CAA       | GGCAG       | CAATCAG      | -GATTGC     | AATCAT  | G        | GTTCCTG  | CATATG       | ATGAC    | AATGT     | CGCCCCAAG |
| SARS-CoV-2 NC_045512.2 (29251) | TTT       | GG--        | GACGTG       | GTTGACCT    | ACA     | CA-G     | ---GTGC  | CATCAA       | AT       | TGGATGAC  | AAAGATCCA |
|                                |           | Section 389 |              |             |         |          |          |              |          |           |           |
| (37637)                        | 37637     | 37650       | 37660        | 37670       | 37680   | 37690    | 37700    | 37710        | 37720    | 37733     |           |
| lambda NC_001416.1 (36173)     | G         | TAGTG       | G---CGG      | AAA--AGGAG  | A       | TAGCA    | AATGCT   | TACGATA      | TAACG    | -TAA      | GGAA      |
| SARS-CoV-2 NC_045512.2 (29342) | ATT       | GAC         | G            | CATACA      | AAACATT | CCC      | ACCAAC   | AGA          | GCT---   | AAAAAG    | GAC       |
|                                |           | Section 390 |              |             |         |          |          |              |          |           |           |
| (37734)                        | 37734     | 37740       | 37750        | 37760       | 37770   | 37780    | 37790    | 37800        | 37810    | 37820     | 37830     |
| lambda NC_001416.1 (36260)     | AA        | TTA         | CTCCTGA      | TAA         | TTAATC  | CTTA     | AACTT    | TGC          | CCACC    | TGCCT     | TTA       |
| SARS-CoV-2 NC_045512.2 (29436) | AA        | CAG         | CAAACTG      | TGA-CTC     | TTCTT   | CCTGC    | TGCA-GAT | TGGATG       | --ATTTCT | CCAAAC    | AAT       |
|                                |           | Section 391 |              |             |         |          |          |              |          |           |           |
| (37831)                        | 37831     | 37840       | 37850        | 37860       | 37870   | 37880    | 37890    | 37900        | 37910    | 37927     |           |
| lambda NC_001416.1 (36357)     | T         | CAGC        | TATCT        | CAG-CAT     | TGGTGA  | CCTTGTT  | CAGAG    | GC           | GCTGA    | GAGAT     | GGCCT     |
| SARS-CoV-2 NC_045512.2 (29522) | AC---     | TCAGG       | CCTAA        | ACTCAT      | -GCAG   | ACCA     | CAAG     | -GCAG        | ATG      | GGCTATAT  | TAA       |
|                                |           | Section 392 |              |             |         |          |          |              |          |           |           |
| (37928)                        | 37928     | 37940       | 37950        | 37960       | 37970   | 37980    | 37990    | 38000        | 38010    | 38024     |           |
| lambda NC_001416.1 (36453)     | TT        | TGCC        | CGCAG        | GCTAAT      | TGTCTGA | AAATTT   | GAGGTG   | ACGGG        | TTA      | AAATA     | ATAT      |
| SARS-CoV-2 NC_045512.2 (29600) | AG        | TCTAC       | TCTT         | GTGC        | AGAATGA | ATTC     | TCGTA    | ACTAC        | ATAGCA   | CAAGTA    | GATGTAG   |



## SARS-CoV-2 &amp; lambda.apr

|                                |         |                 |                  |              |              |              |               |                |             |               |                          |
|--------------------------------|---------|-----------------|------------------|--------------|--------------|--------------|---------------|----------------|-------------|---------------|--------------------------|
|                                |         |                 |                  |              |              |              |               |                |             |               | Section 393              |
|                                | (38025) | 38025           | 38030            | 38040        | 38050        | 38060        | 38070         | 38080          | 38090       | 38100         | 38110 38121              |
| lambda NC_001416.1 (36544)     |         | TAATGACT        | -ATATCC          | AATGAGTCA    | AAAGCTC      | -CCCTT       | CAATATCT      | GTTGCCCT       | TAAGACCTT   | TAATATATCGCCA | AATACAGGTAGCTTGGCTTCT    |
| SARS-CoV-2 NC_045512.2 (29692) |         | GTAAACATT       | TAGGGAGG         | ACTTG-AAAG   | AGCCACCA     | -CAATT       | TT--CAG       | CGAGGCCAC      | --GCGGAG    | TACGATCG----  | AGTG---TACAGTGAACAAT     |
|                                |         |                 |                  |              |              |              |               |                |             |               | Section 394              |
|                                | (38122) | 38122           | 38130            | 38140        | 38150        | 38160        | 38170         | 38180          | 38190       | 38200         | 38218                    |
| lambda NC_001416.1 (36639)     |         | ACCTTCACCGTT    | GTTGGGCCGATG     | AAATG-CAT    | ATGCA        | TAAACAT      | CGTCTTT       | GTTGGTGGT      | TCCCCTC     | ATCAGTGGC     | TCTATCTGAACGCGCTCTCCACTG |
| SARS-CoV-2 NC_045512.2 (29773) |         | GCTAGGGAGAGCT   | GCTATATGGAA      | AGGCCCTA     | ATGTG        | TAAAT        | TAATTTT       | --AG--         | TAGTGCT     | ATCCCCA--     | TGTGATTTTAATAGCTTCTTAGGA |
|                                |         |                 |                  |              |              |              |               |                |             |               | Section 395              |
|                                | (38219) | 38219           | 38230            | 38240        | 38250        | 38260        | 38270         | 38280          | 38290       | 38300         | 38315                    |
| lambda NC_001416.1 (36735)     |         | CTT-AATGAC      | ATTTCCT---       | TTCCCGATT    | AAAAAA       | T---C        | TGTCAGATCGGAT | GTTGGTTCGGCCCG | AAAACAGTTCT | TGGCAAACCAAT  | GTTGTCGCC                |
| SARS-CoV-2 NC_045512.2 (29864) |         | GAATGACA        | AAAAAAAAAAAAAAAA | AAAAAA       | AAAAAA       | AAAAAA       | -----         | -----          | -----       | -----         | -----                    |
|                                |         |                 |                  |              |              |              |               |                |             |               | Section 396              |
|                                | (38316) | 38316           | 38330            | 38340        | 38350        | 38360        | 38370         | 38380          | 38390       | 38400         | 38412                    |
| lambda NC_001416.1 (36824)     |         | TTCAACAAACAAAAA | GATGGGAATCCCAAT  | GATTCGTCATCT | GCGAGGCTGTT  | CTTAATATCTT  | CAACTGAAGCTTT | TAGAGCGATTT    | TATCTTCTGA  | -----         | -----                    |
| SARS-CoV-2 NC_045512.2 (29904) |         | -----           | -----            | -----        | -----        | -----        | -----         | -----          | -----       | -----         | -----                    |
|                                |         |                 |                  |              |              |              |               |                |             |               | Section 397              |
|                                | (38413) | 38413           | 38420            | 38430        | 38440        | 38450        | 38460         | 38470          | 38480       | 38490         | 38509                    |
| lambda NC_001416.1 (36921)     |         | ACCAGACTCTT     | GTCATTTGTTTT     | GGTAAAGAGAAA | AGTTTTT      | TCCATCGATTTT | TATGAATATACAA | ATAATTGGAGCCA  | AACCTGCAGGT | GATGATTAT     | -----                    |
| SARS-CoV-2 NC_045512.2 (29904) |         | -----           | -----            | -----        | -----        | -----        | -----         | -----          | -----       | -----         | -----                    |
|                                |         |                 |                  |              |              |              |               |                |             |               | Section 398              |
|                                | (38510) | 38510           | 38520            | 38530        | 38540        | 38550        | 38560         | 38570          | 38580       | 38590         | 38606                    |
| lambda NC_001416.1 (37018)     |         | CAGCCAGCAGAGA   | AATTAAGGAAAA     | CAGACAGGTTT  | TATTGAGCGCTT | ATCTTTCCCTTT | ATTTTTGCTGCGG | TAAAGTCGCATA   | AAAAACCATT  | CTTTCAT       | -----                    |
| SARS-CoV-2 NC_045512.2 (29904) |         | -----           | -----            | -----        | -----        | -----        | -----         | -----          | -----       | -----         | -----                    |
|                                |         |                 |                  |              |              |              |               |                |             |               | Section 399              |
|                                | (38607) | 38607           | 38620            | 38630        | 38640        | 38650        | 38660         | 38670          | 38680       | 38690         | 38703                    |
| lambda NC_001416.1 (37115)     |         | AATTCAATCCATT   | TACTATGTTAT      | GTTCTGAGGGG  | GAGTGAAAA    | TCCCCTAATT   | TCGATGAAGATT  | CTTGCTCAATT    | GTTATCAGCT  | ATGCGCCGACC   | -----                    |
| SARS-CoV-2 NC_045512.2 (29904) |         | -----           | -----            | -----        | -----        | -----        | -----         | -----          | -----       | -----         | -----                    |

## SARS-CoV-2 &amp; lambda.apr

|                                |                                                                                                     |       |       |       |       |       |       |       |       |       |       |
|--------------------------------|-----------------------------------------------------------------------------------------------------|-------|-------|-------|-------|-------|-------|-------|-------|-------|-------|
| Section 400                    |                                                                                                     |       |       |       |       |       |       |       |       |       |       |
| (38704)                        | 38704                                                                                               | 38710 | 38720 | 38730 | 38740 | 38750 | 38760 | 38770 | 38780 | 38790 | 38800 |
| lambda NC_001416.1 (37212)     | AGAACACCTTGCCGATCAGCCAAACGTCTCTTCAGGGCCACTGACTAGCGATAACTTTCCCCACAACGGAACAACCTCTCATTGCATGGGATCATTGGG |       |       |       |       |       |       |       |       |       |       |
| SARS-CoV-2 NC_045512.2 (29904) | -----                                                                                               |       |       |       |       |       |       |       |       |       |       |
| Section 401                    |                                                                                                     |       |       |       |       |       |       |       |       |       |       |
| (38801)                        | 38801                                                                                               | 38810 | 38820 | 38830 | 38840 | 38850 | 38860 | 38870 | 38880 | 38897 |       |
| lambda NC_001416.1 (37309)     | TACTGTGGGTTTAGTGGTTGTAAAAACACCTGACCGCTATCCCTGATCAGTTTCTTGAAGGTAAACTCATCACCCCCAAGTCTGGCTATGCAGAAAT   |       |       |       |       |       |       |       |       |       |       |
| SARS-CoV-2 NC_045512.2 (29904) | -----                                                                                               |       |       |       |       |       |       |       |       |       |       |
| Section 402                    |                                                                                                     |       |       |       |       |       |       |       |       |       |       |
| (38898)                        | 38898                                                                                               | 38910 | 38920 | 38930 | 38940 | 38950 | 38960 | 38970 | 38980 | 38994 |       |
| lambda NC_001416.1 (37406)     | CACCTGGCTCAACAGCCTGCTCAGGGTCAACGAGAATTAACATTCCGTCAGGAAAGCTTGGCTTGGAGCCTGTTGGTGCGGTCATGGAATTACCTTC   |       |       |       |       |       |       |       |       |       |       |
| SARS-CoV-2 NC_045512.2 (29904) | -----                                                                                               |       |       |       |       |       |       |       |       |       |       |
| Section 403                    |                                                                                                     |       |       |       |       |       |       |       |       |       |       |
| (38995)                        | 38995                                                                                               | 39000 | 39010 | 39020 | 39030 | 39040 | 39050 | 39060 | 39070 | 39080 | 39091 |
| lambda NC_001416.1 (37503)     | AACCTCAAGCCAGAATGCAGAATCACTGGCTTTTTTGGTTGTGCTTACCCATCTCTCCGCATCACCTTTGGTAAAGGTTCTAAGCTCAGGTGAGAAC   |       |       |       |       |       |       |       |       |       |       |
| SARS-CoV-2 NC_045512.2 (29904) | -----                                                                                               |       |       |       |       |       |       |       |       |       |       |
| Section 404                    |                                                                                                     |       |       |       |       |       |       |       |       |       |       |
| (39092)                        | 39092                                                                                               | 39100 | 39110 | 39120 | 39130 | 39140 | 39150 | 39160 | 39170 | 39188 |       |
| lambda NC_001416.1 (37600)     | ATCCCTGCCTGAACATGAGAAAAACAGGGTACTCATACTCACTTCTAAGTGACGGCTGCATACTAACCGCTTCATACATCTCGTAGATTTCTCTGG    |       |       |       |       |       |       |       |       |       |       |
| SARS-CoV-2 NC_045512.2 (29904) | -----                                                                                               |       |       |       |       |       |       |       |       |       |       |
| Section 405                    |                                                                                                     |       |       |       |       |       |       |       |       |       |       |
| (39189)                        | 39189                                                                                               | 39200 | 39210 | 39220 | 39230 | 39240 | 39250 | 39260 | 39270 | 39285 |       |
| lambda NC_001416.1 (37697)     | CGATTGAAGGGCTAAATTCTTCAACGCTAACTTTGAGAATTTTGTGCAAGCAATGCGGCGTTATAAGCATTTAATGCATTGATGCCATTAAATAAAGC  |       |       |       |       |       |       |       |       |       |       |
| SARS-CoV-2 NC_045512.2 (29904) | -----                                                                                               |       |       |       |       |       |       |       |       |       |       |
| Section 406                    |                                                                                                     |       |       |       |       |       |       |       |       |       |       |
| (39286)                        | 39286                                                                                               | 39300 | 39310 | 39320 | 39330 | 39340 | 39350 | 39360 | 39370 | 39382 |       |
| lambda NC_001416.1 (37794)     | ACCAACGCCTGACTGCCCCATCCCCATCTTGTCTGCGACAGATTCTTGGGATAAGCCAAGTTCATTTTTCTTTTTTTCATAAATTGCTTTAAGGCGA   |       |       |       |       |       |       |       |       |       |       |
| SARS-CoV-2 NC_045512.2 (29904) | -----                                                                                               |       |       |       |       |       |       |       |       |       |       |

## SARS-CoV-2 &amp; lambda.apr

|                                |         |                                                                                                    |       |       |       |       |       |       |       |       |             |
|--------------------------------|---------|----------------------------------------------------------------------------------------------------|-------|-------|-------|-------|-------|-------|-------|-------|-------------|
|                                |         |                                                                                                    |       |       |       |       |       |       |       |       | Section 407 |
|                                | (39383) | 39383                                                                                              | 39390 | 39400 | 39410 | 39420 | 39430 | 39440 | 39450 | 39460 | 39479       |
| lambda NC_001416.1 (37891)     |         | CGTGCGTCCTCAAGCTGCTCTTGTGTTAATGGTTTCTTTTTTGTGCTCATACGTTAAATCTATCACCGCAAGGGATAAAATATCTAACACCGTGCGTG |       |       |       |       |       |       |       |       |             |
| SARS-CoV-2 NC_045512.2 (29904) |         | -----                                                                                              |       |       |       |       |       |       |       |       |             |
|                                |         |                                                                                                    |       |       |       |       |       |       |       |       | Section 408 |
|                                | (39480) | 39480                                                                                              | 39490 | 39500 | 39510 | 39520 | 39530 | 39540 | 39550 | 39560 | 39576       |
| lambda NC_001416.1 (37988)     |         | TTGACTATTTTACCTCTGGCGGTGATAATGGTTGCATGTACTAAGGAGGTTGTATGGAACAACGCATAACCCCTGAAAGATTATGCAATGCGCTTTGG |       |       |       |       |       |       |       |       |             |
| SARS-CoV-2 NC_045512.2 (29904) |         | -----                                                                                              |       |       |       |       |       |       |       |       |             |
|                                |         |                                                                                                    |       |       |       |       |       |       |       |       | Section 409 |
|                                | (39577) | 39577                                                                                              | 39590 | 39600 | 39610 | 39620 | 39630 | 39640 | 39650 | 39660 | 39673       |
| lambda NC_001416.1 (38085)     |         | GCAAACCAAGACAGCTAAAGATCTCGGCGTATATCAAAGCGCGATCAACAAGGCCATTCATGCAGGCCGAAAGATTTTTTTAACTATAAACGCTGAT  |       |       |       |       |       |       |       |       |             |
| SARS-CoV-2 NC_045512.2 (29904) |         | -----                                                                                              |       |       |       |       |       |       |       |       |             |
|                                |         |                                                                                                    |       |       |       |       |       |       |       |       | Section 410 |
|                                | (39674) | 39674                                                                                              | 39680 | 39690 | 39700 | 39710 | 39720 | 39730 | 39740 | 39750 | 39760 39770 |
| lambda NC_001416.1 (38182)     |         | GGAAGCGTTTATGCGGAAGAGGTAAAGCCCTTCCCGAGTAACAAAAAACAACAGCATAAATAACCCCGCTCTTACACATTCCAGCCCTGAAAAAGG   |       |       |       |       |       |       |       |       |             |
| SARS-CoV-2 NC_045512.2 (29904) |         | -----                                                                                              |       |       |       |       |       |       |       |       |             |
|                                |         |                                                                                                    |       |       |       |       |       |       |       |       | Section 411 |
|                                | (39771) | 39771                                                                                              | 39780 | 39790 | 39800 | 39810 | 39820 | 39830 | 39840 | 39850 | 39867       |
| lambda NC_001416.1 (38279)     |         | GCATCAAATTAAACCACACCTATGGTGTATGCATTTATTTGCATACATTCAATCAATTGTTATCTAAGGAAATACTTACATATGGTTCGTGCAAACA  |       |       |       |       |       |       |       |       |             |
| SARS-CoV-2 NC_045512.2 (29904) |         | -----                                                                                              |       |       |       |       |       |       |       |       |             |
|                                |         |                                                                                                    |       |       |       |       |       |       |       |       | Section 412 |
|                                | (39868) | 39868                                                                                              | 39880 | 39890 | 39900 | 39910 | 39920 | 39930 | 39940 | 39950 | 39964       |
| lambda NC_001416.1 (38376)     |         | AACGCAACGAGGCTCTACGAATCGAGAGTGCGTTGCTTAACAAAATCGCAATGCTTGGAAGTGAAGACAGCGGAAGCTGTGGGCGTTGATAAGTC    |       |       |       |       |       |       |       |       |             |
| SARS-CoV-2 NC_045512.2 (29904) |         | -----                                                                                              |       |       |       |       |       |       |       |       |             |
|                                |         |                                                                                                    |       |       |       |       |       |       |       |       | Section 413 |
|                                | (39965) | 39965                                                                                              | 39970 | 39980 | 39990 | 40000 | 40010 | 40020 | 40030 | 40040 | 40050 40061 |
| lambda NC_001416.1 (38473)     |         | GCAGATCAGCAGGTGGAAGAGGGACTGGATTCCAAAGTTCTCAATGCTGCTTGCTGTTCTTGAATGGGGGTCGTTGACGACGACATGGCTCGATTG   |       |       |       |       |       |       |       |       |             |
| SARS-CoV-2 NC_045512.2 (29904) |         | -----                                                                                              |       |       |       |       |       |       |       |       |             |

## SARS-CoV-2 &amp; lambda.apr

|                                |         |                                                                                                    |       |       |       |       |       |       |       |       |             |
|--------------------------------|---------|----------------------------------------------------------------------------------------------------|-------|-------|-------|-------|-------|-------|-------|-------|-------------|
|                                |         |                                                                                                    |       |       |       |       |       |       |       |       | Section 414 |
|                                | (40062) | 40062                                                                                              | 40070 | 40080 | 40090 | 40100 | 40110 | 40120 | 40130 | 40140 | 40158       |
| lambda NC_001416.1 (38570)     |         | GCGCGACAAGTTGCTGCGATTCTACCAATAAAAAACGCCCGCGGCAACCGAGCGTTCTGAACAAATCCAGATGGAGTTCTGAGGTCATTACTGGA    |       |       |       |       |       |       |       |       |             |
| SARS-CoV-2 NC_045512.2 (29904) |         | -----                                                                                              |       |       |       |       |       |       |       |       |             |
|                                |         |                                                                                                    |       |       |       |       |       |       |       |       | Section 415 |
|                                | (40159) | 40159                                                                                              | 40170 | 40180 | 40190 | 40200 | 40210 | 40220 | 40230 | 40240 | 40255       |
| lamhda NC_001416.1 (38667)     |         | TCTATCAACAGGAGTCATTATGACAAATACAGCAAAAATACTCAACTTCGGCAGAGGTAACTTTGCCGGACAGGAGCGTAATGTGGCAGATCTCGAT  |       |       |       |       |       |       |       |       |             |
| SARS-CoV-2 NC_045512.2 (29904) |         | -----                                                                                              |       |       |       |       |       |       |       |       |             |
|                                |         |                                                                                                    |       |       |       |       |       |       |       |       | Section 416 |
|                                | (40256) | 40256                                                                                              | 40270 | 40280 | 40290 | 40300 | 40310 | 40320 | 40330 | 40340 | 40352       |
| lambda NC_001416.1 (38764)     |         | GATGGTTACGCCAGACTATCAAATATGCTGCTTGAGGCTTATTCGGGCGCAGATCTGACCAAGCGACAGTTTAAAGTGCTGCTTGCCATTCTGCGTA  |       |       |       |       |       |       |       |       |             |
| SARS-CoV-2 NC_045512.2 (29904) |         | -----                                                                                              |       |       |       |       |       |       |       |       |             |
|                                |         |                                                                                                    |       |       |       |       |       |       |       |       | Section 417 |
|                                | (40353) | 40353                                                                                              | 40360 | 40370 | 40380 | 40390 | 40400 | 40410 | 40420 | 40430 | 40449       |
| lamhda NC_001416.1 (38861)     |         | AAACCTATGGGTGGAATAAACCAATGGACAGAATCACCGATTCTCAACTTAGCGAGATTACAAAGTTACCTGTCAAACGGTGCAATGAAGCCAAGTT  |       |       |       |       |       |       |       |       |             |
| SARS-CoV-2 NC_045512.2 (29904) |         | -----                                                                                              |       |       |       |       |       |       |       |       |             |
|                                |         |                                                                                                    |       |       |       |       |       |       |       |       | Section 418 |
|                                | (40450) | 40450                                                                                              | 40460 | 40470 | 40480 | 40490 | 40500 | 40510 | 40520 | 40530 | 40546       |
| lambda NC_001416.1 (38958)     |         | AGAACTCGTCAGAATGAATATTATCAAGCAGCAAGGCGGCATGTTTGGACCAAATAAAAAACATCTCAGAATGGTGCATCCCTCAAAACGAGGGAAAA |       |       |       |       |       |       |       |       |             |
| SARS-CoV-2 NC_045512.2 (29904) |         | -----                                                                                              |       |       |       |       |       |       |       |       |             |
|                                |         |                                                                                                    |       |       |       |       |       |       |       |       | Section 419 |
|                                | (40547) | 40547                                                                                              | 40560 | 40570 | 40580 | 40590 | 40600 | 40610 | 40620 | 40630 | 40643       |
| lambda NC_001416.1 (39055)     |         | TCCCCTAAACGAGGGATAAAACATCCCTCAAATTGGGGGATTGCTATCCCTCAAAACAGGGGGACACAAAAGACACTATTACAAAAGAAAAAGAA    |       |       |       |       |       |       |       |       |             |
| SARS-CoV-2 NC_045512.2 (29904) |         | -----                                                                                              |       |       |       |       |       |       |       |       |             |
|                                |         |                                                                                                    |       |       |       |       |       |       |       |       | Section 420 |
|                                | (40644) | 40644                                                                                              | 40650 | 40660 | 40670 | 40680 | 40690 | 40700 | 40710 | 40720 | 40730 40740 |
| lamhda NC_001416.1 (39152)     |         | AAGATTATTTCGTCAGAGAATTCTGGCGAATCCTCTGACCAGCCAGAAAACGACCTTTCTGTGGTGAAACCGGATGCTGCAATTCAGAGCGGCAGCAA |       |       |       |       |       |       |       |       |             |
| SARS-CoV-2 NC_045512.2 (29904) |         | -----                                                                                              |       |       |       |       |       |       |       |       |             |

## SARS-CoV-2 &amp; lambda.apr

|                                |         |                                                                                                    |       |       |       |       |       |       |       |       |             |
|--------------------------------|---------|----------------------------------------------------------------------------------------------------|-------|-------|-------|-------|-------|-------|-------|-------|-------------|
|                                |         |                                                                                                    |       |       |       |       |       |       |       |       | Section 421 |
|                                | (40741) | 40741                                                                                              | 40750 | 40760 | 40770 | 40780 | 40790 | 40800 | 40810 | 40820 | 40837       |
| lambda NC_001416.1 (39249)     |         | GTGGGGGACAGCAGAAGACCTGACCGCCGCAGAGTGGATGTTTGACATGGTGAAGACTATCGCACCATCAGCCAGAAAACCGAATTTTGCTGGGTGG  |       |       |       |       |       |       |       |       |             |
| SARS-CoV-2 NC_045512.2 (29904) |         | -----                                                                                              |       |       |       |       |       |       |       |       |             |
|                                |         |                                                                                                    |       |       |       |       |       |       |       |       | Section 422 |
|                                | (40838) | 40838                                                                                              | 40850 | 40860 | 40870 | 40880 | 40890 | 40900 | 40910 | 40920 | 40934       |
| lambda NC_001416.1 (39346)     |         | GCTAACGATATCCGCCTGATGCGTGAACGTGACGGACGTAACCACCGCGACATGTGTGTGCTGTTCCGCTGGGCATGCCAGGACAACCTTCTGGTCCG |       |       |       |       |       |       |       |       |             |
| SARS-CoV-2 NC_045512.2 (29904) |         | -----                                                                                              |       |       |       |       |       |       |       |       |             |
|                                |         |                                                                                                    |       |       |       |       |       |       |       |       | Section 423 |
|                                | (40935) | 40935                                                                                              | 40940 | 40950 | 40960 | 40970 | 40980 | 40990 | 41000 | 41010 | 41020 41031 |
| lambda NC_001416.1 (39443)     |         | GTAACGTGCTGAGCCCGGCCAAACTCCGCGATAAGTGGACCCAACTCGAAATCAACCGTAACAAGCAACAGGCAGGCGTGACAGCCAGCAAACCAA   |       |       |       |       |       |       |       |       |             |
| SARS-CoV-2 NC_045512.2 (29904) |         | -----                                                                                              |       |       |       |       |       |       |       |       |             |
|                                |         |                                                                                                    |       |       |       |       |       |       |       |       | Section 424 |
|                                | (41032) | 41032                                                                                              | 41040 | 41050 | 41060 | 41070 | 41080 | 41090 | 41100 | 41110 | 41128       |
| lambda NC_001416.1 (39540)     |         | ACTCGACCTGACAAACACAGACTGGATTTACGGGGTGGATCTATGAAAAACATCGCCGCACAGATGGTTAACTTTGACCGTGAGCAGATGCGTCGGA  |       |       |       |       |       |       |       |       |             |
| SARS-CoV-2 NC_045512.2 (29904) |         | -----                                                                                              |       |       |       |       |       |       |       |       |             |
|                                |         |                                                                                                    |       |       |       |       |       |       |       |       | Section 425 |
|                                | (41129) | 41129                                                                                              | 41140 | 41150 | 41160 | 41170 | 41180 | 41190 | 41200 | 41210 | 41225       |
| lambda NC_001416.1 (39637)     |         | TCGCCAACAACATGCCGGAACAGTACGACGAAAAGCCGCAGGTACAGCAGGTAGCGCAGATCATCAACGGTGTGTTTCAGCCAGTTACTGGCAACTTT |       |       |       |       |       |       |       |       |             |
| SARS-CoV-2 NC_045512.2 (29904) |         | -----                                                                                              |       |       |       |       |       |       |       |       |             |
|                                |         |                                                                                                    |       |       |       |       |       |       |       |       | Section 426 |
|                                | (41226) | 41226                                                                                              | 41240 | 41250 | 41260 | 41270 | 41280 | 41290 | 41300 | 41310 | 41322       |
| lambda NC_001416.1 (39734)     |         | CCCGGCGAGCCTGGCTAACCGTGACCAGAACGAAGTGAACGAAATCCGTCGCCAGTGGGTTCTGGCTTTTCGGGAAAACGGGATCACCACGATGGAA  |       |       |       |       |       |       |       |       |             |
| SARS-CoV-2 NC_045512.2 (29904) |         | -----                                                                                              |       |       |       |       |       |       |       |       |             |
|                                |         |                                                                                                    |       |       |       |       |       |       |       |       | Section 427 |
|                                | (41323) | 41323                                                                                              | 41330 | 41340 | 41350 | 41360 | 41370 | 41380 | 41390 | 41400 | 41419       |
| lambda NC_001416.1 (39831)     |         | CAGGTTAACGCAGGAATGCGCGTAGCCCGTCGGCAGAATCGACCATTTCTGCCATCACCAGGCGAGTTTGTGTCATGGTGCCGGGAAGAAGCATCCG  |       |       |       |       |       |       |       |       |             |
| SARS-CoV-2 NC_045512.2 (29904) |         | -----                                                                                              |       |       |       |       |       |       |       |       |             |

## SARS-CoV-2 &amp; lambda.apr

|                                |         |                                                                                                    |       |       |       |       |       |       |       |       |             |
|--------------------------------|---------|----------------------------------------------------------------------------------------------------|-------|-------|-------|-------|-------|-------|-------|-------|-------------|
|                                |         |                                                                                                    |       |       |       |       |       |       |       |       | Section 428 |
|                                | (41420) | 41420                                                                                              | 41430 | 41440 | 41450 | 41460 | 41470 | 41480 | 41490 | 41500 | 41516       |
| lambda NC_001416.1 (39928)     |         | TTACCGCCGGACTGCCAAACGTCAGCGAGCTGGTTGATATGGTTTACGAGTATTGCCGGAAGCGAGGCCTGTATCCGGATGCGGAGTCTTATCCGTG  |       |       |       |       |       |       |       |       |             |
| SARS-CoV-2 NC_045512.2 (29904) |         | -----                                                                                              |       |       |       |       |       |       |       |       |             |
|                                |         |                                                                                                    |       |       |       |       |       |       |       |       | Section 429 |
|                                | (41517) | 41517                                                                                              | 41530 | 41540 | 41550 | 41560 | 41570 | 41580 | 41590 | 41600 | 41613       |
| lambda NC_001416.1 (40025)     |         | GAAATCAAACGCGCACTACTGGCTGGTTACCAACCTGTATCAGAACATGCGGGCCAATGCGCTTACTGATGCGGAATTACGCCGTAAGGCCGCGAGAT |       |       |       |       |       |       |       |       |             |
| SARS-CoV-2 NC_045512.2 (29904) |         | -----                                                                                              |       |       |       |       |       |       |       |       |             |
|                                |         |                                                                                                    |       |       |       |       |       |       |       |       | Section 430 |
|                                | (41614) | 41614                                                                                              | 41620 | 41630 | 41640 | 41650 | 41660 | 41670 | 41680 | 41690 | 41700 41710 |
| lambda NC_001416.1 (40122)     |         | GAGCTTGTCATATGACTGCGAGAATTAACCGTGGTGAGGCGATCCCTGAACCAGTAAAACAACCTTCCTGTCATGGGCGGTAGACCTCTAAATCGTG  |       |       |       |       |       |       |       |       |             |
| SARS-CoV-2 NC_045512.2 (29904) |         | -----                                                                                              |       |       |       |       |       |       |       |       |             |
|                                |         |                                                                                                    |       |       |       |       |       |       |       |       | Section 431 |
|                                | (41711) | 41711                                                                                              | 41720 | 41730 | 41740 | 41750 | 41760 | 41770 | 41780 | 41790 | 41807       |
| lambda NC_001416.1 (40219)     |         | CACAGGCTCTGGCGAAGATCGCAGAAATCAAAGCTAAGTTCGGACTGAAAGGAGCAAGTGTATGACGGGCAAAGAGGCAATTATTTCATTACCTGGGG |       |       |       |       |       |       |       |       |             |
| SARS-CoV-2 NC_045512.2 (29904) |         | -----                                                                                              |       |       |       |       |       |       |       |       |             |
|                                |         |                                                                                                    |       |       |       |       |       |       |       |       | Section 432 |
|                                | (41808) | 41808                                                                                              | 41820 | 41830 | 41840 | 41850 | 41860 | 41870 | 41880 | 41890 | 41904       |
| lambda NC_001416.1 (40316)     |         | ACGCATAATAGCTTCTGTGCGCCGGACGTTGCCGCGCTAACAGGCGCAACAGTAACCAGCATAAATCAGGCCGCGGCTAAAATGGCACGGGCAGGTC  |       |       |       |       |       |       |       |       |             |
| SARS-CoV-2 NC_045512.2 (29904) |         | -----                                                                                              |       |       |       |       |       |       |       |       |             |
|                                |         |                                                                                                    |       |       |       |       |       |       |       |       | Section 433 |
|                                | (41905) | 41905 41910                                                                                        | 41920 | 41930 | 41940 | 41950 | 41960 | 41970 | 41980 | 41990 | 42001       |
| lambda NC_001416.1 (40413)     |         | TTCTGGTTATCGAAGGTAAGGTCTGGCGAACGGTGTATTACCGGTTTGCTACCAGGGAAGAACGGGAAGGAAAGATGAGCACGAACCTGGTTTTTTAA |       |       |       |       |       |       |       |       |             |
| SARS-CoV-2 NC_045512.2 (29904) |         | -----                                                                                              |       |       |       |       |       |       |       |       |             |
|                                |         |                                                                                                    |       |       |       |       |       |       |       |       | Section 434 |
|                                | (42002) | 42002                                                                                              | 42010 | 42020 | 42030 | 42040 | 42050 | 42060 | 42070 | 42080 | 42098       |
| lambda NC_001416.1 (40510)     |         | GGAGTGTCGCCAGAGTGCCGCGATGAAACGGGTATTGGCGGTATATGGAGTTAAAAGATGACCATCTACATTACTGAGCTAATAACAGGCCTGCTGG  |       |       |       |       |       |       |       |       |             |
| SARS-CoV-2 NC_045512.2 (29904) |         | -----                                                                                              |       |       |       |       |       |       |       |       |             |

## SARS-CoV-2 &amp; lambda.apr

|                                |         |                                                                                                     |       |       |       |       |       |       |       |       |             |
|--------------------------------|---------|-----------------------------------------------------------------------------------------------------|-------|-------|-------|-------|-------|-------|-------|-------|-------------|
|                                |         |                                                                                                     |       |       |       |       |       |       |       |       | Section 435 |
|                                | (42099) | 42099                                                                                               | 42110 | 42120 | 42130 | 42140 | 42150 | 42160 | 42170 | 42180 | 42195       |
| lambda NC_001416.1 (40607)     |         | TAATCGCAGGCCTTTTTATTTGGGGGAGAGGGAAGTCATGAAAAAATAACCTTTGAAATTTCGATCTCCAGCACATCAGCAAAACGCTATTCACGCA   |       |       |       |       |       |       |       |       |             |
| SARS-CoV-2 NC_045512.2 (29904) |         | -----                                                                                               |       |       |       |       |       |       |       |       |             |
|                                |         |                                                                                                     |       |       |       |       |       |       |       |       | Section 436 |
|                                | (42196) | 42196                                                                                               | 42210 | 42220 | 42230 | 42240 | 42250 | 42260 | 42270 | 42280 | 42292       |
| lambda NC_001416.1 (40704)     |         | GTACAGCAAATCCTTCCAGACCCAACCAACCAATCGTAGTAACCATTCAGGAACGCAACCGCAGCTTAGACCAAAACAGGAAGCTATGGGCCTGCT    |       |       |       |       |       |       |       |       |             |
| SARS-CoV-2 NC_045512.2 (29904) |         | -----                                                                                               |       |       |       |       |       |       |       |       |             |
|                                |         |                                                                                                     |       |       |       |       |       |       |       |       | Section 437 |
|                                | (42293) | 42293                                                                                               | 42300 | 42310 | 42320 | 42330 | 42340 | 42350 | 42360 | 42370 | 42389       |
| lambda NC_001416.1 (40801)     |         | TAGGTGACGTCTCTCGTCAGGTTGAATGGCATGGTCGCTGGCTGGATGCAGAAAGCTGGAAGTGTGTGTTTACCGCAGCATTAAAGCAGCAGGATGT   |       |       |       |       |       |       |       |       |             |
| SARS-CoV-2 NC_045512.2 (29904) |         | -----                                                                                               |       |       |       |       |       |       |       |       |             |
|                                |         |                                                                                                     |       |       |       |       |       |       |       |       | Section 438 |
|                                | (42390) | 42390                                                                                               | 42400 | 42410 | 42420 | 42430 | 42440 | 42450 | 42460 | 42470 | 42486       |
| lambda NC_001416.1 (40898)     |         | TGTTCCCTAACCTTGCCGGGAATGGCTTTGTGGTAATAGGCCAGTCAACCAGCAGGATGCGTGTAGGCGAATTTGCGGAGCTATTAGAGCTTATACAG  |       |       |       |       |       |       |       |       |             |
| SARS-CoV-2 NC_045512.2 (29904) |         | -----                                                                                               |       |       |       |       |       |       |       |       |             |
|                                |         |                                                                                                     |       |       |       |       |       |       |       |       | Section 439 |
|                                | (42487) | 42487                                                                                               | 42500 | 42510 | 42520 | 42530 | 42540 | 42550 | 42560 | 42570 | 42583       |
| lambda NC_001416.1 (40995)     |         | GCATTCCGTACAGAGCGTGGCGTTAAGTGGTCAGACGAAGCGAGACTGGCTCTGGAGTGGAAGCGAGATGGGGAGACAGGGCTGCATGATAAATGT    |       |       |       |       |       |       |       |       |             |
| SARS-CoV-2 NC_045512.2 (29904) |         | -----                                                                                               |       |       |       |       |       |       |       |       |             |
|                                |         |                                                                                                     |       |       |       |       |       |       |       |       | Section 440 |
|                                | (42584) | 42584                                                                                               | 42590 | 42600 | 42610 | 42620 | 42630 | 42640 | 42650 | 42660 | 42670 42680 |
| lambda NC_001416.1 (41092)     |         | CGTTAGTTTCTCCGGTGGCAGGACGTCAGCATATTTGCTCTGGCTAATGGAGCAAAAGCGACGGGCAGGTAAAGACGTGCATTACGTTTTTCATGGAT  |       |       |       |       |       |       |       |       |             |
| SARS-CoV-2 NC_045512.2 (29904) |         | -----                                                                                               |       |       |       |       |       |       |       |       |             |
|                                |         |                                                                                                     |       |       |       |       |       |       |       |       | Section 441 |
|                                | (42681) | 42681                                                                                               | 42690 | 42700 | 42710 | 42720 | 42730 | 42740 | 42750 | 42760 | 42777       |
| lambda NC_001416.1 (41189)     |         | ACAGGTTGTGAACATCCAATGACATATCGGTTTGTTCAGGGGAAGTTGTGAAGTTCTGGGATATACCGCTCACCCTATTGCAGGTTGATATCAACCCGG |       |       |       |       |       |       |       |       |             |
| SARS-CoV-2 NC_045512.2 (29904) |         | -----                                                                                               |       |       |       |       |       |       |       |       |             |

## SARS-CoV-2 &amp; lambda.apr

|                                |         |                                                                                                     |       |       |       |       |       |       |       |       |             |       |
|--------------------------------|---------|-----------------------------------------------------------------------------------------------------|-------|-------|-------|-------|-------|-------|-------|-------|-------------|-------|
|                                |         |                                                                                                     |       |       |       |       |       |       |       |       | Section 442 |       |
|                                | (42778) | 42778                                                                                               | 42790 | 42800 | 42810 | 42820 | 42830 | 42840 | 42850 | 42860 | 42874       |       |
| lambda NC_001416.1 (41286)     |         | AGCTTGGACAGCCAAATGGTTATACGGTATGGGAACCAAAGGATATTCAGACGCGAATGCCTGTTCTGAAGCCATTTATCGATATGGTAAAGAAATA   |       |       |       |       |       |       |       |       |             |       |
| SARS-CoV-2 NC_045512.2 (29904) |         | -----                                                                                               |       |       |       |       |       |       |       |       |             |       |
|                                |         |                                                                                                     |       |       |       |       |       |       |       |       | Section 443 |       |
|                                | (42875) | 42875                                                                                               | 42880 | 42890 | 42900 | 42910 | 42920 | 42930 | 42940 | 42950 | 42960       | 42971 |
| lambda NC_001416.1 (41383)     |         | TGGCACTCCATACGTCGGCGGCGCGTTCTGCACTGACAGATTAAAACTCGTTCCTTCACCAAATACTGTGATGACCATTTCGGGCGAGGGAATTAC    |       |       |       |       |       |       |       |       |             |       |
| SARS-CoV-2 NC_045512.2 (29904) |         | -----                                                                                               |       |       |       |       |       |       |       |       |             |       |
|                                |         |                                                                                                     |       |       |       |       |       |       |       |       | Section 444 |       |
|                                | (42972) | 42972                                                                                               | 42980 | 42990 | 43000 | 43010 | 43020 | 43030 | 43040 | 43050 | 43068       |       |
| lambda NC_001416.1 (41480)     |         | ACCACGTGGATTGGCATCAGAGCTGATGAACCGAAGCGGCTAAAGCCAAAGCCTGGAATCAGATATCTTGCTGAACTGTCAGACTTTGAGAAGGAAG   |       |       |       |       |       |       |       |       |             |       |
| SARS-CoV-2 NC_045512.2 (29904) |         | -----                                                                                               |       |       |       |       |       |       |       |       |             |       |
|                                |         |                                                                                                     |       |       |       |       |       |       |       |       | Section 445 |       |
|                                | (43069) | 43069                                                                                               | 43080 | 43090 | 43100 | 43110 | 43120 | 43130 | 43140 | 43150 | 43165       |       |
| lambda NC_001416.1 (41577)     |         | ATATCCTCGCATGGTGGAAGCAACAACCATTCGATTTGCAAATACCGGAACATCTCGGTAACATGTCATATTCTGCATTAAAAAATCAACGCAAAAAAT |       |       |       |       |       |       |       |       |             |       |
| SARS-CoV-2 NC_045512.2 (29904) |         | -----                                                                                               |       |       |       |       |       |       |       |       |             |       |
|                                |         |                                                                                                     |       |       |       |       |       |       |       |       | Section 446 |       |
|                                | (43166) | 43166                                                                                               | 43180 | 43190 | 43200 | 43210 | 43220 | 43230 | 43240 | 43250 | 43262       |       |
| lambda NC_001416.1 (41674)     |         | CGGACTTGCTGCAAAGATGAGGAGGGATTGCAGCGTGTTTTTAATGAGGTCATCACGGGATCCCATGTGCGTGACGGACATCGGGAAACGCCAAAG    |       |       |       |       |       |       |       |       |             |       |
| SARS-CoV-2 NC_045512.2 (29904) |         | -----                                                                                               |       |       |       |       |       |       |       |       |             |       |
|                                |         |                                                                                                     |       |       |       |       |       |       |       |       | Section 447 |       |
|                                | (43263) | 43263                                                                                               | 43270 | 43280 | 43290 | 43300 | 43310 | 43320 | 43330 | 43340 | 43359       |       |
| lambda NC_001416.1 (41771)     |         | GAGATTATGTACCGAGGAAGAATGTCGCTGGACGGTATCGCGAAAATGTATTGAGAAAATGATTATCAAGCCCTGTATCAGGACATGGTACGAGCTA   |       |       |       |       |       |       |       |       |             |       |
| SARS-CoV-2 NC_045512.2 (29904) |         | -----                                                                                               |       |       |       |       |       |       |       |       |             |       |
|                                |         |                                                                                                     |       |       |       |       |       |       |       |       | Section 448 |       |
|                                | (43360) | 43360                                                                                               | 43370 | 43380 | 43390 | 43400 | 43410 | 43420 | 43430 | 43440 | 43456       |       |
| lambda NC_001416.1 (41868)     |         | AAAGATTGATACCGGCTCTTGTTCTGAGTCATGCGAAAATATTTGGAGGGCAGCTTGATTTGCACTTCGGGAGGGAAGCTGCATGATGCGATGTTAT   |       |       |       |       |       |       |       |       |             |       |
| SARS-CoV-2 NC_045512.2 (29904) |         | -----                                                                                               |       |       |       |       |       |       |       |       |             |       |



## SARS-CoV-2 &amp; lambda.apr

|                                |         |                                                                                                            |       |       |       |       |       |       |       |       |             |
|--------------------------------|---------|------------------------------------------------------------------------------------------------------------|-------|-------|-------|-------|-------|-------|-------|-------|-------------|
|                                |         |                                                                                                            |       |       |       |       |       |       |       |       | Section 449 |
|                                | (43457) | 43457                                                                                                      | 43470 | 43480 | 43490 | 43500 | 43510 | 43520 | 43530 | 43540 | 43553       |
| lambda NC_001416.1 (41965)     |         | CGGTGCGGTGAATGCAAAGAAGATAACCGCTTCCGACCAAATCAACCTTACTGGAATCGATGGTGTCTCCGGTGTGAAAGAACACCAACAGGGGTGT          |       |       |       |       |       |       |       |       |             |
| SARS-CoV-2 NC_045512.2 (29904) |         | -----                                                                                                      |       |       |       |       |       |       |       |       |             |
|                                |         |                                                                                                            |       |       |       |       |       |       |       |       | Section 450 |
|                                | (43554) | 43554                                                                                                      | 43560 | 43570 | 43580 | 43590 | 43600 | 43610 | 43620 | 43630 | 43640 43650 |
| lamhda NC_001416.1 (42062)     |         | TACCACTACCGCAGGAAAAGGAGGACGTGTGGCGAGACAGCGACGAAGTATCACCGACATAATCTGCGAAAAC TGC AAACTGCAAATACCTTCCAACGAAACGC |       |       |       |       |       |       |       |       |             |
| SARS-CoV-2 NC_045512.2 (29904) |         | -----                                                                                                      |       |       |       |       |       |       |       |       |             |
|                                |         |                                                                                                            |       |       |       |       |       |       |       |       | Section 451 |
|                                | (43651) | 43651                                                                                                      | 43660 | 43670 | 43680 | 43690 | 43700 | 43710 | 43720 | 43730 | 43747       |
| lambda NC_001416.1 (42159)     |         | ACCAGAAATAAACCCAAGCCAATCCCAAAAGAATCTGACGTAAAAACCTTCAACTACACGGCTCACCTGTGGGATATCCGGTGGCTAAGACGTCGTG          |       |       |       |       |       |       |       |       |             |
| SARS-CoV-2 NC_045512.2 (29904) |         | -----                                                                                                      |       |       |       |       |       |       |       |       |             |
|                                |         |                                                                                                            |       |       |       |       |       |       |       |       | Section 452 |
|                                | (43748) | 43748                                                                                                      | 43760 | 43770 | 43780 | 43790 | 43800 | 43810 | 43820 | 43830 | 43844       |
| lamhda NC_001416.1 (42256)     |         | CGAGGAAAACAAGGTGATTGACCAAAATCGAAGTTACGAACAAGAAAGCGTCGAGCGAGCTTTAACGTGCGCTAACTGCGGTGAGAAAGCTGCATGTG         |       |       |       |       |       |       |       |       |             |
| SARS-CoV-2 NC_045512.2 (29904) |         | -----                                                                                                      |       |       |       |       |       |       |       |       |             |
|                                |         |                                                                                                            |       |       |       |       |       |       |       |       | Section 453 |
|                                | (43845) | 43845                                                                                                      | 43850 | 43860 | 43870 | 43880 | 43890 | 43900 | 43910 | 43920 | 43930 43941 |
| lambda NC_001416.1 (42353)     |         | CTGGAAGTTCACGTGTGTGAGCACTGCTGCGCAGAACTGATGAGCGATCCGAATAGCTCGATGCACGAGGAAGAAGATGATGGCTAAACCAGCGCGA          |       |       |       |       |       |       |       |       |             |
| SARS-CoV-2 NC_045512.2 (29904) |         | -----                                                                                                      |       |       |       |       |       |       |       |       |             |
|                                |         |                                                                                                            |       |       |       |       |       |       |       |       | Section 454 |
|                                | (43942) | 43942                                                                                                      | 43950 | 43960 | 43970 | 43980 | 43990 | 44000 | 44010 | 44020 | 44038       |
| lambda NC_001416.1 (42450)     |         | AGACGATGTAAAAACGATGAATGCCGGGAATGGTTTCACCTGCATTGCTAATCAGTGGTGGTGTCTCTCCAGAGTGTGGAACCAAGATAGCACTCG           |       |       |       |       |       |       |       |       |             |
| SARS-CoV-2 NC_045512.2 (29904) |         | -----                                                                                                      |       |       |       |       |       |       |       |       |             |
|                                |         |                                                                                                            |       |       |       |       |       |       |       |       | Section 455 |
|                                | (44039) | 44039                                                                                                      | 44050 | 44060 | 44070 | 44080 | 44090 | 44100 | 44110 | 44120 | 44135       |
| lamhda NC_001416.1 (42547)     |         | AACGACGAAGTAAAGAACGCGAAAAAGCGGAAAAAGCAGCAGAGAAGAAACGACGACGAGAGGAGCAGAAACAGAAAGATAAACTTAAGATTGAAA           |       |       |       |       |       |       |       |       |             |
| SARS-CoV-2 NC_045512.2 (29904) |         | -----                                                                                                      |       |       |       |       |       |       |       |       |             |

## SARS-CoV-2 &amp; lambda.apr

|                                |         |                                                                                                    |       |       |       |       |       |       |       |       |             |       |
|--------------------------------|---------|----------------------------------------------------------------------------------------------------|-------|-------|-------|-------|-------|-------|-------|-------|-------------|-------|
|                                |         |                                                                                                    |       |       |       |       |       |       |       |       | Section 456 |       |
|                                | (44136) | 44136                                                                                              | 44150 | 44160 | 44170 | 44180 | 44190 | 44200 | 44210 | 44220 | 44232       |       |
| lambda NC_001416.1 (42644)     |         | ACTCGCCTTAAAGCCCCGCAGTTACTGGATTAAACAAGCCCAACAAGCCGTAAACGCCTTCATCAGAGAAAGAGACCGCGACTTACCATGTATCTCG  |       |       |       |       |       |       |       |       |             |       |
| SARS-CoV-2 NC_045512.2 (29904) |         | -----                                                                                              |       |       |       |       |       |       |       |       |             |       |
|                                |         |                                                                                                    |       |       |       |       |       |       |       |       | Section 457 |       |
|                                | (44233) | 44233                                                                                              | 44240 | 44250 | 44260 | 44270 | 44280 | 44290 | 44300 | 44310 | 44329       |       |
| lambda NC_001416.1 (42741)     |         | TGCGGAACGCTCACGTCTGCTCAGTGGGATGCCGGACATTACCGGACAACCTGCTGCGGCACCTCAACTCCGATTTAATGAACGCAATATTCACAAGC |       |       |       |       |       |       |       |       |             |       |
| SARS-CoV-2 NC_045512.2 (29904) |         | -----                                                                                              |       |       |       |       |       |       |       |       |             |       |
|                                |         |                                                                                                    |       |       |       |       |       |       |       |       | Section 458 |       |
|                                | (44330) | 44330                                                                                              | 44340 | 44350 | 44360 | 44370 | 44380 | 44390 | 44400 | 44410 | 44426       |       |
| lambda NC_001416.1 (42838)     |         | AATGCGTGGTGTGCAACCAGCACAAAAGCGGAAATCTCGTTCCGTATCGCGTCGAACTGATTAGCCGCATCGGGCAGGAAGCAGTAGACGAAATCGA  |       |       |       |       |       |       |       |       |             |       |
| SARS-CoV-2 NC_045512.2 (29904) |         | -----                                                                                              |       |       |       |       |       |       |       |       |             |       |
|                                |         |                                                                                                    |       |       |       |       |       |       |       |       | Section 459 |       |
|                                | (44427) | 44427                                                                                              | 44440 | 44450 | 44460 | 44470 | 44480 | 44490 | 44500 | 44510 | 44523       |       |
| lambda NC_001416.1 (42935)     |         | ATCAAACCATAACCGCCATCGCTGGACTATCGAAGAGTGCAAGGCGATCAAGGCAGAGTACCAACAGAACTCAAAGACCTGCGAAATAGCAGAAGT   |       |       |       |       |       |       |       |       |             |       |
| SARS-CoV-2 NC_045512.2 (29904) |         | -----                                                                                              |       |       |       |       |       |       |       |       |             |       |
|                                |         |                                                                                                    |       |       |       |       |       |       |       |       | Section 460 |       |
|                                | (44524) | 44524                                                                                              | 44530 | 44540 | 44550 | 44560 | 44570 | 44580 | 44590 | 44600 | 44610       | 44620 |
| lambda NC_001416.1 (43032)     |         | GAGGCCGCATGACGTTCTCAGTAAAAACCATTCAGACATGCTCGTTGAAGCATACGGAAATCAGACAGAAGTAGCACGCAGACTGAAATGTAGTCG   |       |       |       |       |       |       |       |       |             |       |
| SARS-CoV-2 NC_045512.2 (29904) |         | -----                                                                                              |       |       |       |       |       |       |       |       |             |       |
|                                |         |                                                                                                    |       |       |       |       |       |       |       |       | Section 461 |       |
|                                | (44621) | 44621                                                                                              | 44630 | 44640 | 44650 | 44660 | 44670 | 44680 | 44690 | 44700 | 44717       |       |
| lambda NC_001416.1 (43129)     |         | CGGTACGGTCAGAAAATACGTTGATGATAAAGACGGGAAAATGCACGCCATCGTCAACGACGTTCTCATGGTTCATCGCGGATGGAGTGAAAGAGAT  |       |       |       |       |       |       |       |       |             |       |
| SARS-CoV-2 NC_045512.2 (29904) |         | -----                                                                                              |       |       |       |       |       |       |       |       |             |       |
|                                |         |                                                                                                    |       |       |       |       |       |       |       |       | Section 462 |       |
|                                | (44718) | 44718                                                                                              | 44730 | 44740 | 44750 | 44760 | 44770 | 44780 | 44790 | 44800 | 44814       |       |
| lambda NC_001416.1 (43226)     |         | GCGCTATTACGAAAAAATTGATGGCAGCAAATACCGAAATATTTGGGTAGTTGGCGATCTGCACGGATGCTACACGAACCTGATGAACAAACTGGAT  |       |       |       |       |       |       |       |       |             |       |
| SARS-CoV-2 NC_045512.2 (29904) |         | -----                                                                                              |       |       |       |       |       |       |       |       |             |       |

## SARS-CoV-2 &amp; lambda.apr

|                                |                                                                                                    |       |       |       |       |       |       |       |       |             |
|--------------------------------|----------------------------------------------------------------------------------------------------|-------|-------|-------|-------|-------|-------|-------|-------|-------------|
| Section 463                    |                                                                                                    |       |       |       |       |       |       |       |       |             |
| (44815)                        | 44815                                                                                              | 44820 | 44830 | 44840 | 44850 | 44860 | 44870 | 44880 | 44890 | 44900 44911 |
| lambda NC_001416.1 (43323)     | ACGATTGGATTTCGACAACAAAAAGACCTGCTTATCTCGGTGGGCGATTTGGTTGATCGTGGTGCAGAGAACGTTGAATGCCTGGAATTAATCACAT  |       |       |       |       |       |       |       |       |             |
| SARS-CoV-2 NC_045512.2 (29904) | -----                                                                                              |       |       |       |       |       |       |       |       |             |
| Section 464                    |                                                                                                    |       |       |       |       |       |       |       |       |             |
| (44912)                        | 44912                                                                                              | 44920 | 44930 | 44940 | 44950 | 44960 | 44970 | 44980 | 44990 | 45008       |
| lambda NC_001416.1 (43420)     | TCCCCTGGTTCAGAGCTGTACGTGGAAACCATGAGCAAATGATGATTGATGGCTTATCAGAGCGTGGAAACGTTAATCACTGGCTGCTTAATGGCGG  |       |       |       |       |       |       |       |       |             |
| SARS-CoV-2 NC_045512.2 (29904) | -----                                                                                              |       |       |       |       |       |       |       |       |             |
| Section 465                    |                                                                                                    |       |       |       |       |       |       |       |       |             |
| (45009)                        | 45009                                                                                              | 45020 | 45030 | 45040 | 45050 | 45060 | 45070 | 45080 | 45090 | 45105       |
| lambda NC_001416.1 (43517)     | TGGCTGGTTCTTTAATCTCGATTACGACAAAGAAATTCTGGCTAAAGCTCTTGCCCATAAAGCAGATGAACTTCCGTTAATCATCGAACTGGTGAGC  |       |       |       |       |       |       |       |       |             |
| SARS-CoV-2 NC_045512.2 (29904) | -----                                                                                              |       |       |       |       |       |       |       |       |             |
| Section 466                    |                                                                                                    |       |       |       |       |       |       |       |       |             |
| (45106)                        | 45106                                                                                              | 45120 | 45130 | 45140 | 45150 | 45160 | 45170 | 45180 | 45190 | 45202       |
| lambda NC_001416.1 (43614)     | AAAGATAAAAAATATGTTATCTGCCACGCCGATTATCCCTTTGACGAATACGAGTTTGGAAAGCCAGTTGATCATCAGCAGGTAATCTGGAACCGCG  |       |       |       |       |       |       |       |       |             |
| SARS-CoV-2 NC_045512.2 (29904) | -----                                                                                              |       |       |       |       |       |       |       |       |             |
| Section 467                    |                                                                                                    |       |       |       |       |       |       |       |       |             |
| (45203)                        | 45203                                                                                              | 45210 | 45220 | 45230 | 45240 | 45250 | 45260 | 45270 | 45280 | 45299       |
| lambda NC_001416.1 (43711)     | AACGAATCAGCAACTCACAAAACGGGATCGTGAAAGAAATCAAAGGCGCGGACACGTTTCATCTTTGGTCATACGCCAGCAGTGAAACCACTCAAGTT |       |       |       |       |       |       |       |       |             |
| SARS-CoV-2 NC_045512.2 (29904) | -----                                                                                              |       |       |       |       |       |       |       |       |             |
| Section 468                    |                                                                                                    |       |       |       |       |       |       |       |       |             |
| (45300)                        | 45300                                                                                              | 45310 | 45320 | 45330 | 45340 | 45350 | 45360 | 45370 | 45380 | 45396       |
| lambda NC_001416.1 (43808)     | TGCCAACCAAATGTATATCGATACCGGCGCAGTGTCTGCGGAAACCTAACATTGATTTCAGGTACAGGGAGAAGGCGCATGAGACTCGAAAGCGTAG  |       |       |       |       |       |       |       |       |             |
| SARS-CoV-2 NC_045512.2 (29904) | -----                                                                                              |       |       |       |       |       |       |       |       |             |
| Section 469                    |                                                                                                    |       |       |       |       |       |       |       |       |             |
| (45397)                        | 45397                                                                                              | 45410 | 45420 | 45430 | 45440 | 45450 | 45460 | 45470 | 45480 | 45493       |
| lambda NC_001416.1 (43905)     | CTAAATTTTCATTCGCCAAAAAGCCCGATGATGAGCGACTCACACGGGCCACGGCTTCTGACTCTCTTTCCGGTACTGATGTGATGGCTGCTATGGG  |       |       |       |       |       |       |       |       |             |
| SARS-CoV-2 NC_045512.2 (29904) | -----                                                                                              |       |       |       |       |       |       |       |       |             |

SARS-CoV-2 & lambda.apr

|                                |                                                                                                    |       |       |       |       |       |       |       |       |       |             |  |
|--------------------------------|----------------------------------------------------------------------------------------------------|-------|-------|-------|-------|-------|-------|-------|-------|-------|-------------|--|
|                                |                                                                                                    |       |       |       |       |       |       |       |       |       | Section 470 |  |
| (45494)                        | 45494                                                                                              | 45500 | 45510 | 45520 | 45530 | 45540 | 45550 | 45560 | 45570 | 45580 | 45590       |  |
| lambda NC_001416.1 (44002)     | GATGGCGCAATCACAAGCCGGATTTCGGTATGGCTGCATTCTGCGGTAAGCACGAACTCAGCCAGAACGACAAACAAAAGGCTATCAACTATCTGATG |       |       |       |       |       |       |       |       |       |             |  |
| SARS-CoV-2 NC_045512.2 (29904) | -----                                                                                              |       |       |       |       |       |       |       |       |       |             |  |
|                                |                                                                                                    |       |       |       |       |       |       |       |       |       | Section 471 |  |
| (45591)                        | 45591                                                                                              | 45600 | 45610 | 45620 | 45630 | 45640 | 45650 | 45660 | 45670 | 45687 |             |  |
| lambda NC_001416.1 (44099)     | CAATTTGCACACAAGGTATCGGGGAAATACCGTGGTGTGGCAAAGCTTGAAGGAAATACTAAGGCAAAGGTACTGCAAGTGCTCGCAACATTTCGCTT |       |       |       |       |       |       |       |       |       |             |  |
| SARS-CoV-2 NC_045512.2 (29904) | -----                                                                                              |       |       |       |       |       |       |       |       |       |             |  |
|                                |                                                                                                    |       |       |       |       |       |       |       |       |       | Section 472 |  |
| (45688)                        | 45688                                                                                              | 45700 | 45710 | 45720 | 45730 | 45740 | 45750 | 45760 | 45770 | 45784 |             |  |
| lambda NC_001416.1 (44196)     | ATGCGGATTATTGCCGTAGTGCCGCGACGCCGGGGCAAGATGCAGAGATTGCCATGGTACAGGCCGTGCGGTTGATATTGCCAAAACAGAGCTGTG   |       |       |       |       |       |       |       |       |       |             |  |
| SARS-CoV-2 NC_045512.2 (29904) | -----                                                                                              |       |       |       |       |       |       |       |       |       |             |  |
|                                |                                                                                                    |       |       |       |       |       |       |       |       |       | Section 473 |  |
| (45785)                        | 45785                                                                                              | 45790 | 45800 | 45810 | 45820 | 45830 | 45840 | 45850 | 45860 | 45870 | 45881       |  |
| lambda NC_001416.1 (44293)     | GGGGAGAGTTGTCGAGAAAGAGTGCGGAAGATGCAAAGGCGTCGGCTATTCAAGGATGCCAGCAAGCGCAGCATATCGCGCTGTGACGATGCTAATC  |       |       |       |       |       |       |       |       |       |             |  |
| SARS-CoV-2 NC_045512.2 (29904) | -----                                                                                              |       |       |       |       |       |       |       |       |       |             |  |
|                                |                                                                                                    |       |       |       |       |       |       |       |       |       | Section 474 |  |
| (45882)                        | 45882                                                                                              | 45890 | 45900 | 45910 | 45920 | 45930 | 45940 | 45950 | 45960 | 45978 |             |  |
| lambda NC_001416.1 (44390)     | CCAAACCTTACCCAACCCACCTGGTCACGCACTGTTAAGCCGCTGTATGACGCTCTGGTGGTGAATGCCACAAAGAAGAGTCAATCGCAGACAACA   |       |       |       |       |       |       |       |       |       |             |  |
| SARS-CoV-2 NC_045512.2 (29904) | -----                                                                                              |       |       |       |       |       |       |       |       |       |             |  |
|                                |                                                                                                    |       |       |       |       |       |       |       |       |       | Section 475 |  |
| (45979)                        | 45979                                                                                              | 45990 | 46000 | 46010 | 46020 | 46030 | 46040 | 46050 | 46060 | 46075 |             |  |
| lambda NC_001416.1 (44487)     | TTTTGAATGCGGTCACACGTTAGCAGCATGATTGCCACGGATGGCAACATATTAACGGCATGATATTGACTTATTGAATAAAATTGGGTAAATTTGA  |       |       |       |       |       |       |       |       |       |             |  |
| SARS-CoV-2 NC_045512.2 (29904) | -----                                                                                              |       |       |       |       |       |       |       |       |       |             |  |
|                                |                                                                                                    |       |       |       |       |       |       |       |       |       | Section 476 |  |
| (46076)                        | 46076                                                                                              | 46090 | 46100 | 46110 | 46120 | 46130 | 46140 | 46150 | 46160 | 46172 |             |  |
| lambda NC_001416.1 (44584)     | CTCAACGATGGGTAAATTCGCTCGTTGTGGTAGTGAGATGAAAAGAGGCGGCGCTTACTACCGATTCCGCCTAGTTGGTCACTTCGACGTATCGTCT  |       |       |       |       |       |       |       |       |       |             |  |
| SARS-CoV-2 NC_045512.2 (29904) | -----                                                                                              |       |       |       |       |       |       |       |       |       |             |  |

## SARS-CoV-2 &amp; lambda.apr

|                                |         |                                                                                                     |       |       |       |       |       |       |       |       |             |
|--------------------------------|---------|-----------------------------------------------------------------------------------------------------|-------|-------|-------|-------|-------|-------|-------|-------|-------------|
|                                |         |                                                                                                     |       |       |       |       |       |       |       |       | Section 477 |
|                                | (46173) | 46173                                                                                               | 46180 | 46190 | 46200 | 46210 | 46220 | 46230 | 46240 | 46250 | 46269       |
| lambda NC_001416.1 (44681)     |         | GGAAC TCCAACCATCGCAGGCAGAGAGGTCTGCAAAATGCAATCCCGAAACAGTTGCGCAGGTAATAGTTAGAGCCTGCATAACGGTTTCGGGATTTT |       |       |       |       |       |       |       |       |             |
| SARS-CoV-2 NC_045512.2 (29904) |         | -----                                                                                               |       |       |       |       |       |       |       |       |             |
|                                |         |                                                                                                     |       |       |       |       |       |       |       |       | Section 478 |
|                                | (46270) | 46270                                                                                               | 46280 | 46290 | 46300 | 46310 | 46320 | 46330 | 46340 | 46350 | 46366       |
| lambda NC_001416.1 (44778)     |         | TTATATCTGCACAACAGGTAAGAGCATTGAGTCGATAATCGTGAAGAGTCGGCGAGCCTGGTTAGCCAGTGCTCTTTCCGTTGTGCTGAATTAAGCG   |       |       |       |       |       |       |       |       |             |
| SARS-CoV-2 NC_045512.2 (29904) |         | -----                                                                                               |       |       |       |       |       |       |       |       |             |
|                                |         |                                                                                                     |       |       |       |       |       |       |       |       | Section 479 |
|                                | (46367) | 46367                                                                                               | 46380 | 46390 | 46400 | 46410 | 46420 | 46430 | 46440 | 46450 | 46463       |
| lambda NC_001416.1 (44875)     |         | AATACCGGAAGCAGAACCGGATCACCAAATGCGTACAGGCGTCATCGCCGCCAGCAACAGCACAACCCAACTGAGCCGTAGCCACTGTCTGTCTCT    |       |       |       |       |       |       |       |       |             |
| SARS-CoV-2 NC_045512.2 (29904) |         | -----                                                                                               |       |       |       |       |       |       |       |       |             |
|                                |         |                                                                                                     |       |       |       |       |       |       |       |       | Section 480 |
|                                | (46464) | 46464                                                                                               | 46470 | 46480 | 46490 | 46500 | 46510 | 46520 | 46530 | 46540 | 46550 46560 |
| lambda NC_001416.1 (44977)     |         | GAATTCATTAGTAATAGTTACGCTGCGGCCTTTTACACATGACCTTCGTGAAAGCGGGTGGCAGGAGGTCGCGCTAACAACCTCCTGCCGTTTTGCC   |       |       |       |       |       |       |       |       |             |
| SARS-CoV-2 NC_045512.2 (29904) |         | -----                                                                                               |       |       |       |       |       |       |       |       |             |
|                                |         |                                                                                                     |       |       |       |       |       |       |       |       | Section 481 |
|                                | (46561) | 46561                                                                                               | 46570 | 46580 | 46590 | 46600 | 46610 | 46620 | 46630 | 46640 | 46657       |
| lambda NC_001416.1 (45069)     |         | CGTGCATATCGGTCACGAACAAATCTGATTACTAAACACAGTAGCCTGGATTGTCTCTATCAGTAATCGACCTTATTCCTAATTAAATAGAGCAAAT   |       |       |       |       |       |       |       |       |             |
| SARS-CoV-2 NC_045512.2 (29904) |         | -----                                                                                               |       |       |       |       |       |       |       |       |             |
|                                |         |                                                                                                     |       |       |       |       |       |       |       |       | Section 482 |
|                                | (46658) | 46658                                                                                               | 46670 | 46680 | 46690 | 46700 | 46710 | 46720 | 46730 | 46740 | 46754       |
| lambda NC_001416.1 (45166)     |         | CCCCCTATTGGGGGTAAGACATGAAGATGCCAGAAAAACATGACCTGTTGGCCGCCATTCTCGCGGCAAAGGAACAAGGCATCGGGGCAATCCTTGC   |       |       |       |       |       |       |       |       |             |
| SARS-CoV-2 NC_045512.2 (29904) |         | -----                                                                                               |       |       |       |       |       |       |       |       |             |
|                                |         |                                                                                                     |       |       |       |       |       |       |       |       | Section 483 |
|                                | (46755) | 46755                                                                                               | 46760 | 46770 | 46780 | 46790 | 46800 | 46810 | 46820 | 46830 | 46840 46851 |
| lambda NC_001416.1 (45263)     |         | GTTTGCAATGGCGTACCTTCGCGGCAGATATAATGGCGGTGCGTTTACAAAAACAGTAATCGACGCAACGATGTGCGCCATTATCGCCTGGTTTCATT  |       |       |       |       |       |       |       |       |             |
| SARS-CoV-2 NC_045512.2 (29904) |         | -----                                                                                               |       |       |       |       |       |       |       |       |             |

## SARS-CoV-2 &amp; lambda.apr

|                                |         |                                                                                                    |       |       |       |       |       |       |       |       |             |
|--------------------------------|---------|----------------------------------------------------------------------------------------------------|-------|-------|-------|-------|-------|-------|-------|-------|-------------|
|                                |         |                                                                                                    |       |       |       |       |       |       |       |       | Section 484 |
|                                | (46852) | 46852                                                                                              | 46860 | 46870 | 46880 | 46890 | 46900 | 46910 | 46920 | 46930 | 46948       |
| lambda NC_001416.1 (45360)     |         | CGTGACCTTCTCGACTTCGCCGGACTAAGTAGCAATCTCGCTTATATAACGAGCGTGTTTATCGGCTACATCGGTACTGACTCGATTGGTTCGCTTA  |       |       |       |       |       |       |       |       |             |
| SARS-CoV-2 NC_045512.2 (29904) |         | -----                                                                                              |       |       |       |       |       |       |       |       |             |
|                                |         |                                                                                                    |       |       |       |       |       |       |       |       | Section 485 |
|                                | (46949) | 46949                                                                                              | 46960 | 46970 | 46980 | 46990 | 47000 | 47010 | 47020 | 47030 | 47045       |
| lamhda NC_001416.1 (45457)     |         | TCAAACGCTTCGCTGCTAAAAAAGCCGGAGTAGAAGATGGTAGAAATCAATAATCAACGTAAGGCGTTCCTCGATATGCTGGCGTGGTCGGAGGGAA  |       |       |       |       |       |       |       |       |             |
| SARS-CoV-2 NC_045512.2 (29904) |         | -----                                                                                              |       |       |       |       |       |       |       |       |             |
|                                |         |                                                                                                    |       |       |       |       |       |       |       |       | Section 486 |
|                                | (47046) | 47046                                                                                              | 47060 | 47070 | 47080 | 47090 | 47100 | 47110 | 47120 | 47130 | 47142       |
| lambda NC_001416.1 (45554)     |         | CTGATAACGGACGTCAGAAAACCAGAAATCATGGTTATGACGTCATTGTAGGCGGAGAGCTATTTACTGATTACTCCGATCACCTCGCAAACCTTGT  |       |       |       |       |       |       |       |       |             |
| SARS-CoV-2 NC_045512.2 (29904) |         | -----                                                                                              |       |       |       |       |       |       |       |       |             |
|                                |         |                                                                                                    |       |       |       |       |       |       |       |       | Section 487 |
|                                | (47143) | 47143                                                                                              | 47150 | 47160 | 47170 | 47180 | 47190 | 47200 | 47210 | 47220 | 47239       |
| lamhda NC_001416.1 (45651)     |         | CACGCTAAACCCAAAACCTCAAATCAACAGGCGCCGGACGCTACCAGCTTCTTTCCCGTTGGTGGGATGCCTACCGCAAGCAGCTTGGCCTGAAAGAC |       |       |       |       |       |       |       |       |             |
| SARS-CoV-2 NC_045512.2 (29904) |         | -----                                                                                              |       |       |       |       |       |       |       |       |             |
|                                |         |                                                                                                    |       |       |       |       |       |       |       |       | Section 488 |
|                                | (47240) | 47240                                                                                              | 47250 | 47260 | 47270 | 47280 | 47290 | 47300 | 47310 | 47320 | 47336       |
| lambda NC_001416.1 (45748)     |         | TTCTCTCCGAAAAGTCAGGACGCTGTGGCATTGCAGCAGATTAAGGAGCGTGGCGCTTTACCTATGATTGATCGTGGTGATATCCGTCAGGCAATCG  |       |       |       |       |       |       |       |       |             |
| SARS-CoV-2 NC_045512.2 (29904) |         | -----                                                                                              |       |       |       |       |       |       |       |       |             |
|                                |         |                                                                                                    |       |       |       |       |       |       |       |       | Section 489 |
|                                | (47337) | 47337                                                                                              | 47350 | 47360 | 47370 | 47380 | 47390 | 47400 | 47410 | 47420 | 47433       |
| lambda NC_001416.1 (45845)     |         | ACCGTTGCAGCAATATCTGGGCTTCACTGCCGGGCGCTGGTTATGGTCAGTTCGAGCATAAGGCTGACAGCCTGATTGCAAAATTCAAAGAAGCGGG  |       |       |       |       |       |       |       |       |             |
| SARS-CoV-2 NC_045512.2 (29904) |         | -----                                                                                              |       |       |       |       |       |       |       |       |             |
|                                |         |                                                                                                    |       |       |       |       |       |       |       |       | Section 490 |
|                                | (47434) | 47434                                                                                              | 47440 | 47450 | 47460 | 47470 | 47480 | 47490 | 47500 | 47510 | 47520 47530 |
| lamhda NC_001416.1 (45942)     |         | CGGAACGGTCAGAGAGATTGATGTATGAGCAGAGTCACCGCGATTATCTCCGCTCTGGTTATCTGCATCATCGTCTGCCTGTCATGGGCTGTTAATC  |       |       |       |       |       |       |       |       |             |
| SARS-CoV-2 NC_045512.2 (29904) |         | -----                                                                                              |       |       |       |       |       |       |       |       |             |

SARS-CoV-2 & lambda.apr

|                                |         |                                                                                                    |       |       |       |       |       |       |       |       |             |       |
|--------------------------------|---------|----------------------------------------------------------------------------------------------------|-------|-------|-------|-------|-------|-------|-------|-------|-------------|-------|
|                                |         |                                                                                                    |       |       |       |       |       |       |       |       | Section 491 |       |
|                                | (47531) | 47531                                                                                              | 47540 | 47550 | 47560 | 47570 | 47580 | 47590 | 47600 | 47610 | 47627       |       |
| lambda NC_001416.1 (46039)     |         | ATTACCGTGATAACGCCATTACCTACAAAGCCCAGCGCGACAAAAATGCCAGAGAACTGAAGCTGGCGAACGCGGCAATTACTGACATGCAGATGCG  |       |       |       |       |       |       |       |       |             |       |
| SARS-CoV-2 NC_045512.2 (29904) |         | -----                                                                                              |       |       |       |       |       |       |       |       |             |       |
|                                |         |                                                                                                    |       |       |       |       |       |       |       |       | Section 492 |       |
|                                | (47628) | 47628                                                                                              | 47640 | 47650 | 47660 | 47670 | 47680 | 47690 | 47700 | 47710 | 47724       |       |
| lambda NC_001416.1 (46136)     |         | TCAGCGTGATGTTGCTGCGCTCGATGCAAAATACACGAAGGAGTTAGCTGATGCTAAAGCTGAAAATGATGCTCTGCGTGATGATGTTGCCGCTGGT  |       |       |       |       |       |       |       |       |             |       |
| SARS-CoV-2 NC_045512.2 (29904) |         | -----                                                                                              |       |       |       |       |       |       |       |       |             |       |
|                                |         |                                                                                                    |       |       |       |       |       |       |       |       | Section 493 |       |
|                                | (47725) | 47725                                                                                              | 47730 | 47740 | 47750 | 47760 | 47770 | 47780 | 47790 | 47800 | 47810       | 47821 |
| lambda NC_001416.1 (46233)     |         | CGTCGTCGGTTGCACATCAAAGCAGTCTGTCAGTCAGTGCGTGAAGCCACCACCGCCTCCGGCGTGGATAATGCAGCCTCCCCCGACTGGCAGACA   |       |       |       |       |       |       |       |       |             |       |
| SARS-CoV-2 NC_045512.2 (29904) |         | -----                                                                                              |       |       |       |       |       |       |       |       |             |       |
|                                |         |                                                                                                    |       |       |       |       |       |       |       |       | Section 494 |       |
|                                | (47822) | 47822                                                                                              | 47830 | 47840 | 47850 | 47860 | 47870 | 47880 | 47890 | 47900 | 47918       |       |
| lambda NC_001416.1 (46330)     |         | CCGCTGAACGGGATTATTTACCCCTCAGAGAGAGGCTGATCACTATGCAAAAACAACCTGGAAGGAACCCAGAAGTATATTAATGAGCAGTGCAGATA |       |       |       |       |       |       |       |       |             |       |
| SARS-CoV-2 NC_045512.2 (29904) |         | -----                                                                                              |       |       |       |       |       |       |       |       |             |       |
|                                |         |                                                                                                    |       |       |       |       |       |       |       |       | Section 495 |       |
|                                | (47919) | 47919                                                                                              | 47930 | 47940 | 47950 | 47960 | 47970 | 47980 | 47990 | 48000 | 48015       |       |
| lambda NC_001416.1 (46427)     |         | GAGTTGCCCATATCGATGGGCAACTCATGCAATTATTGTGAGCAATACACACGCGCTTCCAGCGGAGTATAAATGCCTAAAGTAATAAAACCGAGCA  |       |       |       |       |       |       |       |       |             |       |
| SARS-CoV-2 NC_045512.2 (29904) |         | -----                                                                                              |       |       |       |       |       |       |       |       |             |       |
|                                |         |                                                                                                    |       |       |       |       |       |       |       |       | Section 496 |       |
|                                | (48016) | 48016                                                                                              | 48030 | 48040 | 48050 | 48060 | 48070 | 48080 | 48090 | 48100 | 48112       |       |
| lambda NC_001416.1 (46524)     |         | ATCCATTTACGAATGTTTGCTGGGTTTCTGTTTTAACAAACATTTTCTGCGCCGCCACAAATTTTGGCTGCATCGACAGTTTTCTTCTGCCCAATTCC |       |       |       |       |       |       |       |       |             |       |
| SARS-CoV-2 NC_045512.2 (29904) |         | -----                                                                                              |       |       |       |       |       |       |       |       |             |       |
|                                |         |                                                                                                    |       |       |       |       |       |       |       |       | Section 497 |       |
|                                | (48113) | 48113                                                                                              | 48120 | 48130 | 48140 | 48150 | 48160 | 48170 | 48180 | 48190 | 48209       |       |
| lambda NC_001416.1 (46621)     |         | AGAAACGAAGAAATGATGGGTGATGGTTTCCTTTGGTGCTACTGCTGCCGGTTTGTGTTTGAACAGTAAACGTCTGTTGAGCACATCCTGTAATAAGC |       |       |       |       |       |       |       |       |             |       |
| SARS-CoV-2 NC_045512.2 (29904) |         | -----                                                                                              |       |       |       |       |       |       |       |       |             |       |

## SARS-CoV-2 &amp; lambda.apr

|                                |         |                                                                                                     |       |       |       |       |       |       |       |       |             |
|--------------------------------|---------|-----------------------------------------------------------------------------------------------------|-------|-------|-------|-------|-------|-------|-------|-------|-------------|
| Section 498                    |         |                                                                                                     |       |       |       |       |       |       |       |       |             |
|                                | (48210) | 48210                                                                                               | 48220 | 48230 | 48240 | 48250 | 48260 | 48270 | 48280 | 48290 | 48306       |
| lambda NC_001416.1 (46718)     |         | AGGGCCAGCGCAGTAGCGAGTAGCATTTTTTTCATGGTGTTATTCCCGATGCTTTTTGAAGTTCGCAGAATCGTATGTGTAGAAAATTAAACAAACC   |       |       |       |       |       |       |       |       |             |
| SARS-CoV-2 NC_045512.2 (29904) |         | -----                                                                                               |       |       |       |       |       |       |       |       |             |
| Section 499                    |         |                                                                                                     |       |       |       |       |       |       |       |       |             |
|                                | (48307) | 48307                                                                                               | 48320 | 48330 | 48340 | 48350 | 48360 | 48370 | 48380 | 48390 | 48403       |
| lamhda NC_001416.1 (46815)     |         | CTAAACAATGAGTTGAAATTTTCATATTGTTAATATTTATTAATGTATGTCAGGTGCGATGAATCGTCATTGTATTCCCGGATTAACATATGTCCACAG |       |       |       |       |       |       |       |       |             |
| SARS-CoV-2 NC_045512.2 (29904) |         | -----                                                                                               |       |       |       |       |       |       |       |       |             |
| Section 500                    |         |                                                                                                     |       |       |       |       |       |       |       |       |             |
|                                | (48404) | 48404                                                                                               | 48410 | 48420 | 48430 | 48440 | 48450 | 48460 | 48470 | 48480 | 48490 48500 |
| lambda NC_001416.1 (46912)     |         | CCCTGACGGGGAACCTTCTCTGCGGGAGTGTCGGGAATAATTAAACGATGCACACAGGGTTTAGCGCGTACACGTATTGCATTATGCCAACGCCCC    |       |       |       |       |       |       |       |       |             |
| SARS-CoV-2 NC_045512.2 (29904) |         | -----                                                                                               |       |       |       |       |       |       |       |       |             |
| Section 501                    |         |                                                                                                     |       |       |       |       |       |       |       |       |             |
|                                | (48501) | 48501                                                                                               | 48510 | 48520 | 48530 | 48540 | 48550 | 48560 | 48570 | 48580 | 48597       |
| lamhda NC_001416.1 (47009)     |         | GGTGCTGACACGGAAGAAACCGGACGTTATGATTTAGCGTGGAAGATTTGTGTAGTGTTCTGAATGCTCTCAGTAAATAGTAATGAATTATCAAAG    |       |       |       |       |       |       |       |       |             |
| SARS-CoV-2 NC_045512.2 (29904) |         | -----                                                                                               |       |       |       |       |       |       |       |       |             |
| Section 502                    |         |                                                                                                     |       |       |       |       |       |       |       |       |             |
|                                | (48598) | 48598                                                                                               | 48610 | 48620 | 48630 | 48640 | 48650 | 48660 | 48670 | 48680 | 48694       |
| lambda NC_001416.1 (47106)     |         | GTATAGTAATATCTTTTATGTTTCATGGATATTTGTAACCCATCGGAAACTCCTGCTTTAGCAAGATTTTCCCTGTATTGCTGAAATGTGATTTCTC   |       |       |       |       |       |       |       |       |             |
| SARS-CoV-2 NC_045512.2 (29904) |         | -----                                                                                               |       |       |       |       |       |       |       |       |             |
| Section 503                    |         |                                                                                                     |       |       |       |       |       |       |       |       |             |
|                                | (48695) | 48695                                                                                               | 48700 | 48710 | 48720 | 48730 | 48740 | 48750 | 48760 | 48770 | 48780 48791 |
| lambda NC_001416.1 (47203)     |         | TTGATTTCAACCTATCATAGGACGTTTCTATAAGATGCGTGTTTCTTGAGAATTTAACATTTACAACCTTTTTAAGTCCTTTTATTAACACGGTGTT   |       |       |       |       |       |       |       |       |             |
| SARS-CoV-2 NC_045512.2 (29904) |         | -----                                                                                               |       |       |       |       |       |       |       |       |             |
| Section 504                    |         |                                                                                                     |       |       |       |       |       |       |       |       |             |
|                                | (48792) | 48792                                                                                               | 48800 | 48810 | 48820 | 48830 | 48840 | 48850 | 48860 | 48870 | 48888       |
| lamhda NC_001416.1 (47300)     |         | ATCGTTTTCTAACACGATGTGAATATTATCTGTGGCTAGATAGTAAATATAATGTGAGACGTTGTGACGTTTTAGTTTCAGAATAAAACAATTACAG   |       |       |       |       |       |       |       |       |             |
| SARS-CoV-2 NC_045512.2 (29904) |         | -----                                                                                               |       |       |       |       |       |       |       |       |             |



## SARS-CoV-2 &amp; lambda.apr

|                                |         |                                                                                                    |       |       |       |       |       |       |       |       |             |
|--------------------------------|---------|----------------------------------------------------------------------------------------------------|-------|-------|-------|-------|-------|-------|-------|-------|-------------|
|                                |         |                                                                                                    |       |       |       |       |       |       |       |       | Section 505 |
|                                | (48889) | 48889                                                                                              | 48900 | 48910 | 48920 | 48930 | 48940 | 48950 | 48960 | 48970 | 48985       |
| lambda NC_001416.1 (47397)     |         | TCTAAATCTTTTCGCACTTGATCGAATATTTCTTTAAAAATGGCAACCTGAGCCATTGGTAAAACCTTCCATGTGATACGAGGGCGCGTAGTTTGCA  |       |       |       |       |       |       |       |       |             |
| SARS-CoV-2 NC_045512.2 (29904) |         | -----                                                                                              |       |       |       |       |       |       |       |       |             |
|                                |         |                                                                                                    |       |       |       |       |       |       |       |       | Section 506 |
|                                | (48986) | 48986                                                                                              | 49000 | 49010 | 49020 | 49030 | 49040 | 49050 | 49060 | 49070 | 49082       |
| lamhda NC_001416.1 (47494)     |         | TTATCGTTTTTTATCGTTTCAATCTGGTCTGACCTCCTTGTGTTTTGTTGATGATTTATGTCAAATATTAGGAATGTTTTCACTTAATAGTATTGGTT |       |       |       |       |       |       |       |       |             |
| SARS-CoV-2 NC_045512.2 (29904) |         | -----                                                                                              |       |       |       |       |       |       |       |       |             |
|                                |         |                                                                                                    |       |       |       |       |       |       |       |       | Section 507 |
|                                | (49083) | 49083                                                                                              | 49090 | 49100 | 49110 | 49120 | 49130 | 49140 | 49150 | 49160 | 49179       |
| lambda NC_001416.1 (47591)     |         | GCGTAACAAAGTGCGGTCTGCTGGCATTCTGGAGGGAAATACAACCGACAGATGTATGTAAGGCCAACGTGCTCAAATCTTCATACAGAAAGATT    |       |       |       |       |       |       |       |       |             |
| SARS-CoV-2 NC_045512.2 (29904) |         | -----                                                                                              |       |       |       |       |       |       |       |       |             |
|                                |         |                                                                                                    |       |       |       |       |       |       |       |       | Section 508 |
|                                | (49180) | 49180                                                                                              | 49190 | 49200 | 49210 | 49220 | 49230 | 49240 | 49250 | 49260 | 49276       |
| lamhda NC_001416.1 (47688)     |         | GAAGTAATATTTTAACCGCTAGATGAAGAGCAAGCGCATGGAGCGACAAAATGAATAAAGAACAATCTGCTGATGATCCCTCCGTGGATCTGATT    |       |       |       |       |       |       |       |       |             |
| SARS-CoV-2 NC_045512.2 (29904) |         | -----                                                                                              |       |       |       |       |       |       |       |       |             |
|                                |         |                                                                                                    |       |       |       |       |       |       |       |       | Section 509 |
|                                | (49277) | 49277                                                                                              | 49290 | 49300 | 49310 | 49320 | 49330 | 49340 | 49350 | 49360 | 49373       |
| lambda NC_001416.1 (47785)     |         | TGTAAAAAATATGCTTAATAGCACCATTCTATGAGTTACCCTGATGTTGTAATTGCATGTATAGAACATAAGGTGTCTCTGGAAGCATT          |       |       |       |       |       |       |       |       |             |
| SARS-CoV-2 NC_045512.2 (29904) |         | -----                                                                                              |       |       |       |       |       |       |       |       |             |
|                                |         |                                                                                                    |       |       |       |       |       |       |       |       | Section 510 |
|                                | (49374) | 49374                                                                                              | 49380 | 49390 | 49400 | 49410 | 49420 | 49430 | 49440 | 49450 | 49460 49470 |
| lambda NC_001416.1 (47882)     |         | ATTGAGGCAGCGTTGGTGAAGCACGATAATAATATGAAGGATTATTCCTGGTGGTTGACTGATCACCATAACTGCTAATCATTCAA             |       |       |       |       |       |       |       |       |             |
| SARS-CoV-2 NC_045512.2 (29904) |         | -----                                                                                              |       |       |       |       |       |       |       |       |             |
|                                |         |                                                                                                    |       |       |       |       |       |       |       |       | Section 511 |
|                                | (49471) | 49471                                                                                              | 49480 | 49490 | 49500 | 49510 | 49520 | 49530 | 49540 | 49550 | 49567       |
| lamhda NC_001416.1 (47979)     |         | CTGTGACAGAGCCAACACGCGAGTCTGTCACTGTTCAGGAAAGTGGTAAACTGCAACTCAATTACTGCAATGCCCTCGTAATTAAGTGAATTTACAAT |       |       |       |       |       |       |       |       |             |
| SARS-CoV-2 NC_045512.2 (29904) |         | -----                                                                                              |       |       |       |       |       |       |       |       |             |

## SARS-CoV-2 &amp; lambda.apr

|                                |         |                                                                                                     |       |       |       |       |       |       |       |       |             |       |  |  |  |  |  |
|--------------------------------|---------|-----------------------------------------------------------------------------------------------------|-------|-------|-------|-------|-------|-------|-------|-------|-------------|-------|--|--|--|--|--|
|                                |         |                                                                                                     |       |       |       |       |       |       |       |       | Section 512 |       |  |  |  |  |  |
|                                | (49568) | 49568                                                                                               | 49580 | 49590 | 49600 | 49610 | 49620 | 49630 | 49640 | 49650 | 49664       |       |  |  |  |  |  |
| lambda NC_001416.1 (48076)     |         | ATCGTCCTGTTTCGGAGGGAAGAACGCGGGATGTTTCATTCTTCATCACTTTTAATTGATGTATATGCTCTCTTTTCTGACGTTAGTCTCCGACGGCAG |       |       |       |       |       |       |       |       |             |       |  |  |  |  |  |
| SARS-CoV-2 NC_045512.2 (29904) |         | -----                                                                                               |       |       |       |       |       |       |       |       |             |       |  |  |  |  |  |
|                                |         |                                                                                                     |       |       |       |       |       |       |       |       | Section 513 |       |  |  |  |  |  |
|                                | (49665) | 49665                                                                                               | 49670 | 49680 | 49690 | 49700 | 49710 | 49720 | 49730 | 49740 | 49750       | 49761 |  |  |  |  |  |
| lamhda NC_001416.1 (48173)     |         | GCTTCAATGACCCAGGCTGAGAAATTCCCGGACCCCTTTTGTCTCAAGAGCGATGTTAATTTGTTCAATCATTTGGTTAGGAAAGCGGATGTTGCGGG  |       |       |       |       |       |       |       |       |             |       |  |  |  |  |  |
| SARS-CoV-2 NC_045512.2 (29904) |         | -----                                                                                               |       |       |       |       |       |       |       |       |             |       |  |  |  |  |  |
|                                |         |                                                                                                     |       |       |       |       |       |       |       |       | Section 514 |       |  |  |  |  |  |
|                                | (49762) | 49762                                                                                               | 49770 | 49780 | 49790 | 49800 | 49810 | 49820 | 49830 | 49840 | 49858       |       |  |  |  |  |  |
| lambda NC_001416.1 (48270)     |         | TTGTTGTTCTGCGGGTTCTGTTCTTCGTTGACATGAGGTTGCCCCGTATTCAGTGTCGCTGATTTGTATTGTCTGAAGTTGTTTTTACGTTAAGTTG   |       |       |       |       |       |       |       |       |             |       |  |  |  |  |  |
| SARS-CoV-2 NC_045512.2 (29904) |         | -----                                                                                               |       |       |       |       |       |       |       |       |             |       |  |  |  |  |  |
|                                |         |                                                                                                     |       |       |       |       |       |       |       |       | Section 515 |       |  |  |  |  |  |
|                                | (49859) | 49859                                                                                               | 49870 | 49880 | 49890 | 49900 | 49910 | 49920 | 49930 | 49940 | 49955       |       |  |  |  |  |  |
| lamhda NC_001416.1 (48367)     |         | ATGCAGATCAATTAATACGATACCTGCGTCATAATTGATTATTTGACGTGGTTTGATGGCCTCCACGCACGTTGTGATATGTAGATGATAATCATT    |       |       |       |       |       |       |       |       |             |       |  |  |  |  |  |
| SARS-CoV-2 NC_045512.2 (29904) |         | -----                                                                                               |       |       |       |       |       |       |       |       |             |       |  |  |  |  |  |
|                                |         |                                                                                                     |       |       |       |       |       |       |       |       | Section 516 |       |  |  |  |  |  |
|                                | (49956) | 49956                                                                                               | 49970 | 49980 | 49994 |       |       |       |       |       |             |       |  |  |  |  |  |
| lambda NC_001416.1 (48464)     |         | TCACTTTACGGGTCCTTTCCGGTGATCCGACAGGTTACG                                                             |       |       |       |       |       |       |       |       |             |       |  |  |  |  |  |
| SARS-CoV-2 NC_045512.2 (29904) |         | -----                                                                                               |       |       |       |       |       |       |       |       |             |       |  |  |  |  |  |
