# Supplementary material for: Ubiquitous Micro-Modular Homologies among Genomes from Viruses to Bacteria to Human Mitochondrial DNA: Platforms for Recombination during Evolution?
Source: MDPI journal article supplement (doi:10.3390/v14050885), 2022-04-24
Supplement: s1 [file s1]

## SARS-CoV-2 &amp; Fig badnavirus 1.apr

|                                                                         |       |                                                                                        |     |     |     |     |     |     |     |     |  |
|-------------------------------------------------------------------------|-------|----------------------------------------------------------------------------------------|-----|-----|-----|-----|-----|-----|-----|-----|--|
|                                                                         |       | Section 1                                                                              |     |     |     |     |     |     |     |     |  |
| SARS-CoV-2 Reference Genome NC_045512.2<br>Fig badnavirus 1 NC_017830.1 | (1)   | 1                                                                                      | 10  | 20  | 30  | 40  | 50  | 60  | 70  | 83  |  |
|                                                                         | (1)   | ATTAAAGGTTTATACCTTCCCAGGTAACAAACCAACCAACTTTTCGATCTCTTGTAGATCTGTTCTCTAAACGAACCTTTAAAT   |     |     |     |     |     |     |     |     |  |
|                                                                         |       | Section 2                                                                              |     |     |     |     |     |     |     |     |  |
| SARS-CoV-2 Reference Genome NC_045512.2<br>Fig badnavirus 1 NC_017830.1 | (84)  | 84                                                                                     | 90  | 100 | 110 | 120 | 130 | 140 | 150 | 166 |  |
|                                                                         | (84)  | CTGTGTGGCTGTCACCTCGGCTGCATGCTTAGTGCACTCACGCAGTATAATTAATAACTAATTACTGTCGTTGACAGGACACGA   |     |     |     |     |     |     |     |     |  |
|                                                                         |       | Section 3                                                                              |     |     |     |     |     |     |     |     |  |
| SARS-CoV-2 Reference Genome NC_045512.2<br>Fig badnavirus 1 NC_017830.1 | (167) | 167                                                                                    | 180 | 190 | 200 | 210 | 220 | 230 | 249 |     |  |
|                                                                         | (167) | GTAACCTCGTCTATCTTCTGCAGGCTGCTTACGGTTTTCGTCCGTGTTGCAGCCGATCATCAGCACATCTAGGTTTTCGTCCGGGT |     |     |     |     |     |     |     |     |  |
|                                                                         |       | Section 4                                                                              |     |     |     |     |     |     |     |     |  |
| SARS-CoV-2 Reference Genome NC_045512.2<br>Fig badnavirus 1 NC_017830.1 | (250) | 250                                                                                    | 260 | 270 | 280 | 290 | 300 | 310 | 320 | 332 |  |
|                                                                         | (250) | GTGACCGAAAGGTAAGATGGAGAGCCTTGTCCTGGTTTTCAACGAGAAAACACACGTCCAACCTCAGTTTGCCTGTTTTACAGG   |     |     |     |     |     |     |     |     |  |
|                                                                         |       | Section 5                                                                              |     |     |     |     |     |     |     |     |  |
| SARS-CoV-2 Reference Genome NC_045512.2<br>Fig badnavirus 1 NC_017830.1 | (333) | 333                                                                                    | 340 | 350 | 360 | 370 | 380 | 390 | 400 | 415 |  |
|                                                                         | (333) | TTCGCGACGTGCTCGTACGTGGCTTTGGAGACTCCGTGGAGGAGGTCTTATCAGAGGCACGTCAACATCTTAAAGATGGCACT    |     |     |     |     |     |     |     |     |  |
|                                                                         |       | Section 6                                                                              |     |     |     |     |     |     |     |     |  |
| SARS-CoV-2 Reference Genome NC_045512.2<br>Fig badnavirus 1 NC_017830.1 | (416) | 416                                                                                    | 430 | 440 | 450 | 460 | 470 | 480 | 498 |     |  |
|                                                                         | (416) | TGTGGCTTAGTAGAAGTTGAAAAAGGCGTTTTGCCTCAACTGAACAGCCCTATGTGTTTCATCAAACGTTTCGGATGCTCGAAC   |     |     |     |     |     |     |     |     |  |
|                                                                         |       | Section 7                                                                              |     |     |     |     |     |     |     |     |  |
| SARS-CoV-2 Reference Genome NC_045512.2<br>Fig badnavirus 1 NC_017830.1 | (499) | 499                                                                                    | 510 | 520 | 530 | 540 | 550 | 560 | 570 | 581 |  |
|                                                                         | (499) | TGCACCTCATGGTCATGTTATGGTTGAGCTGGTAGCAGAACTCGAAGGCATTTCAGTACGGTCGTAGTGGTGAGACACTTGGTG   |     |     |     |     |     |     |     |     |  |

SARS-CoV-2 & Fig badnavirus 1.apr

|                                                                         |        |                                                                                       |      |      |      |      |      |      |      |      |  |
|-------------------------------------------------------------------------|--------|---------------------------------------------------------------------------------------|------|------|------|------|------|------|------|------|--|
|                                                                         |        | Section 8                                                                             |      |      |      |      |      |      |      |      |  |
| SARS-CoV-2 Reference Genome NC_045512.2<br>Fig badnavirus 1 NC_017830.1 | (582)  | 582                                                                                   | 590  | 600  | 610  | 620  | 630  | 640  | 650  | 664  |  |
|                                                                         | (582)  | TCCTTGTCCCTCATGTGGGCGAAATACCAGTGGCTTACCGCAAGGTTCTTCTTCGTAAGAACGGTAATAAAGGAGCTGGTGGC   |      |      |      |      |      |      |      |      |  |
|                                                                         | (1)    | -----                                                                                 |      |      |      |      |      |      |      |      |  |
|                                                                         |        | Section 9                                                                             |      |      |      |      |      |      |      |      |  |
| SARS-CoV-2 Reference Genome NC_045512.2<br>Fig badnavirus 1 NC_017830.1 | (665)  | 665                                                                                   | 670  | 680  | 690  | 700  | 710  | 720  | 730  | 747  |  |
|                                                                         | (665)  | CATAGTTACGGCGCCGATCTAAAGTCATTTGACTTAGGCGACGAGCTTGGCACTGATCCTTATGAAGATTTTCAAGAAAACCTG  |      |      |      |      |      |      |      |      |  |
|                                                                         | (1)    | -----                                                                                 |      |      |      |      |      |      |      |      |  |
|                                                                         |        | Section 10                                                                            |      |      |      |      |      |      |      |      |  |
| SARS-CoV-2 Reference Genome NC_045512.2<br>Fig badnavirus 1 NC_017830.1 | (748)  | 748                                                                                   | 760  | 770  | 780  | 790  | 800  | 810  | 820  | 830  |  |
|                                                                         | (748)  | GAACACTAAACATAGCAGTGGTGTTACCCGTGAACCTCATGCGTGAGCTTAACGGAGGGGCATACACTCGCTATGTCGATAACA  |      |      |      |      |      |      |      |      |  |
|                                                                         | (1)    | -----                                                                                 |      |      |      |      |      |      |      |      |  |
|                                                                         |        | Section 11                                                                            |      |      |      |      |      |      |      |      |  |
| SARS-CoV-2 Reference Genome NC_045512.2<br>Fig badnavirus 1 NC_017830.1 | (831)  | 831                                                                                   | 840  | 850  | 860  | 870  | 880  | 890  | 900  | 913  |  |
|                                                                         | (831)  | ACTTCTGTGGCCCTGATGGCTACCCCTCTTGAGTGCATTAAAGACCTTCTAGCACGTGCTGGTAAAGCTTCATGCACCTTTGTCC |      |      |      |      |      |      |      |      |  |
|                                                                         | (1)    | -----                                                                                 |      |      |      |      |      |      |      |      |  |
|                                                                         |        | Section 12                                                                            |      |      |      |      |      |      |      |      |  |
| SARS-CoV-2 Reference Genome NC_045512.2<br>Fig badnavirus 1 NC_017830.1 | (914)  | 914                                                                                   | 920  | 930  | 940  | 950  | 960  | 970  | 980  | 996  |  |
|                                                                         | (914)  | GAACAACTGGACTTTATTGACACTAAGAGGGGTGTATACTGCTGCCGTGAACATGAGCATGAAATTGCTTGGTACACGGAACG   |      |      |      |      |      |      |      |      |  |
|                                                                         | (1)    | -----                                                                                 |      |      |      |      |      |      |      |      |  |
|                                                                         |        | Section 13                                                                            |      |      |      |      |      |      |      |      |  |
| SARS-CoV-2 Reference Genome NC_045512.2<br>Fig badnavirus 1 NC_017830.1 | (997)  | 997                                                                                   | 1010 | 1020 | 1030 | 1040 | 1050 | 1060 | 1079 |      |  |
|                                                                         | (997)  | TTCTGAAAAGAGCTATGAATTGCAGACACCTTTTGAAATTAAATTGGCAAAGAAATTTGACACCTTCAATGGGGAATGTCCAA   |      |      |      |      |      |      |      |      |  |
|                                                                         | (1)    | -----                                                                                 |      |      |      |      |      |      |      |      |  |
|                                                                         |        | Section 14                                                                            |      |      |      |      |      |      |      |      |  |
| SARS-CoV-2 Reference Genome NC_045512.2<br>Fig badnavirus 1 NC_017830.1 | (1080) | 1080                                                                                  | 1090 | 1100 | 1110 | 1120 | 1130 | 1140 | 1150 | 1162 |  |
|                                                                         | (1080) | ATTTTGTATTTCCCTTAAATTCCATAATCAAGACTATTCAACCAAGGGTTGAAAAGAAAAAGCTTGATGGCTTTATGGGTAGA   |      |      |      |      |      |      |      |      |  |
|                                                                         | (1)    | -----                                                                                 |      |      |      |      |      |      |      |      |  |

SARS-CoV-2 & Fig badnavirus 1.apr

|                                                                         |        |                                                                                      |      |      |      |      |      |      |      |      |  |
|-------------------------------------------------------------------------|--------|--------------------------------------------------------------------------------------|------|------|------|------|------|------|------|------|--|
|                                                                         |        | Section 15                                                                           |      |      |      |      |      |      |      |      |  |
| SARS-CoV-2 Reference Genome NC_045512.2<br>Fig badnavirus 1 NC_017830.1 | (1163) | 1163                                                                                 | 1170 | 1180 | 1190 | 1200 | 1210 | 1220 | 1230 | 1245 |  |
|                                                                         | (1163) | ATTTCGATCTGTCTATCCAGTTGCGTCACCAAATGAATGCAACCAAATGTGCCTTTCAACTCTCATGAAGTGTGATCATTGTGG |      |      |      |      |      |      |      |      |  |
|                                                                         |        | -----                                                                                |      |      |      |      |      |      |      |      |  |
|                                                                         |        | Section 16                                                                           |      |      |      |      |      |      |      |      |  |
| SARS-CoV-2 Reference Genome NC_045512.2<br>Fig badnavirus 1 NC_017830.1 | (1246) | 1246                                                                                 | 1260 | 1270 | 1280 | 1290 | 1300 | 1310 | 1328 |      |  |
|                                                                         | (1246) | TGAAACTTCATGGCAGACGGGCGATTTTGTAAAGCCACTTGCGAATTTGTGGCACTGAGAATTTGACTAAAGAAGGTGCCA    |      |      |      |      |      |      |      |      |  |
|                                                                         |        | -----                                                                                |      |      |      |      |      |      |      |      |  |
|                                                                         |        | Section 17                                                                           |      |      |      |      |      |      |      |      |  |
| SARS-CoV-2 Reference Genome NC_045512.2<br>Fig badnavirus 1 NC_017830.1 | (1329) | 1329                                                                                 | 1340 | 1350 | 1360 | 1370 | 1380 | 1390 | 1400 | 1411 |  |
|                                                                         | (1329) | CTACTTGTGGTTACTTACCCCAAATGCTGTTGTTAAATTTATTGTCCAGCATGTCACAATTCAGAAGTAGGACCTGAGCAT    |      |      |      |      |      |      |      |      |  |
|                                                                         |        | -----                                                                                |      |      |      |      |      |      |      |      |  |
|                                                                         |        | Section 18                                                                           |      |      |      |      |      |      |      |      |  |
| SARS-CoV-2 Reference Genome NC_045512.2<br>Fig badnavirus 1 NC_017830.1 | (1412) | 1412                                                                                 | 1420 | 1430 | 1440 | 1450 | 1460 | 1470 | 1480 | 1494 |  |
|                                                                         | (1412) | AGTCTTGCCGAATACCATAATGAATCTGGCTTGAAAACCATTCCTTCGTAAGGGTGGTCGCACTATTGCCTTTGGAGGCTGTGT |      |      |      |      |      |      |      |      |  |
|                                                                         |        | -----                                                                                |      |      |      |      |      |      |      |      |  |
|                                                                         |        | Section 19                                                                           |      |      |      |      |      |      |      |      |  |
| SARS-CoV-2 Reference Genome NC_045512.2<br>Fig badnavirus 1 NC_017830.1 | (1495) | 1495                                                                                 | 1500 | 1510 | 1520 | 1530 | 1540 | 1550 | 1560 | 1577 |  |
|                                                                         | (1495) | GTTCTCTTATGTTGGTTGCCATAACAAGTGTGCCTATTGGGTTCCACGTGCTAGCGCTAACATAGGTTGTAACCATAACAGGTG |      |      |      |      |      |      |      |      |  |
|                                                                         |        | -----                                                                                |      |      |      |      |      |      |      |      |  |
|                                                                         |        | Section 20                                                                           |      |      |      |      |      |      |      |      |  |
| SARS-CoV-2 Reference Genome NC_045512.2<br>Fig badnavirus 1 NC_017830.1 | (1578) | 1578                                                                                 | 1590 | 1600 | 1610 | 1620 | 1630 | 1640 | 1650 | 1660 |  |
|                                                                         | (1578) | TTGTTGGAGAAGGTTCCGAAGGTCTTAATGACAACCTTCTTGAAATACTCCAAAAGAGAAAGTCAACATCAATATTGTTGGT   |      |      |      |      |      |      |      |      |  |
|                                                                         |        | -----                                                                                |      |      |      |      |      |      |      |      |  |
|                                                                         |        | Section 21                                                                           |      |      |      |      |      |      |      |      |  |
| SARS-CoV-2 Reference Genome NC_045512.2<br>Fig badnavirus 1 NC_017830.1 | (1661) | 1661                                                                                 | 1670 | 1680 | 1690 | 1700 | 1710 | 1720 | 1730 | 1743 |  |
|                                                                         | (1661) | GAC TT TAAACTTAATGAAGAGATCGCCATTATTTTGGCATCTTTTCTGCTTCCACAAGTGCTTTTGTGGAACTGTGAAAGG  |      |      |      |      |      |      |      |      |  |
|                                                                         |        | -----                                                                                |      |      |      |      |      |      |      |      |  |

SARS-CoV-2 & Fig badnavirus 1.apr

|                                                                         |                 |                                                                                                                                                                            |      |      |      |      |      |      |      |      |  |
|-------------------------------------------------------------------------|-----------------|----------------------------------------------------------------------------------------------------------------------------------------------------------------------------|------|------|------|------|------|------|------|------|--|
|                                                                         |                 | Section 22                                                                                                                                                                 |      |      |      |      |      |      |      |      |  |
| SARS-CoV-2 Reference Genome NC_045512.2<br>Fig badnavirus 1 NC_017830.1 | (1744)          | 1744                                                                                                                                                                       | 1750 | 1760 | 1770 | 1780 | 1790 | 1800 | 1810 | 1826 |  |
|                                                                         | (1744)<br>(1)   | TTTGGATTATAAAGCATTCAAACAAATTGTTGAATCCTGTGGTAATTTTAAAGTTACAAAAGGAAAAGCTAAAAAAGGTGCCT<br>-----                                                                               |      |      |      |      |      |      |      |      |  |
|                                                                         |                 | Section 23                                                                                                                                                                 |      |      |      |      |      |      |      |      |  |
| SARS-CoV-2 Reference Genome NC_045512.2<br>Fig badnavirus 1 NC_017830.1 | (1827)          | 1827                                                                                                                                                                       | 1840 | 1850 | 1860 | 1870 | 1880 | 1890 | 1909 |      |  |
|                                                                         | (1827)<br>(1)   | GGAATATTGGTGAACAGAAATCAATACTGAGTCCTCTTTATGCATTTGCATCAGAGGCTGCTCGTGTGTACGATCAATTTTC<br>-----                                                                                |      |      |      |      |      |      |      |      |  |
|                                                                         |                 | Section 24                                                                                                                                                                 |      |      |      |      |      |      |      |      |  |
| SARS-CoV-2 Reference Genome NC_045512.2<br>Fig badnavirus 1 NC_017830.1 | (1910)          | 1910                                                                                                                                                                       | 1920 | 1930 | 1940 | 1950 | 1960 | 1970 | 1980 | 1992 |  |
|                                                                         | (1910)<br>(1)   | TCCCGCACTCTTGAAACTGCTCAAAATTCTGTGCGTGTTTTACAGAAGGCCGCTATAACAATACTAGATGGGAATTTCACAG-T<br>-----TGGTA--TCAGAGCT                                                               |      |      |      |      |      |      |      |      |  |
|                                                                         |                 | Section 25                                                                                                                                                                 |      |      |      |      |      |      |      |      |  |
| SARS-CoV-2 Reference Genome NC_045512.2<br>Fig badnavirus 1 NC_017830.1 | (1993)          | 1993                                                                                                                                                                       | 2000 | 2010 | 2020 | 2030 | 2040 | 2050 | 2060 | 2075 |  |
|                                                                         | (1997)<br>(14)  | ATTCACTGAGACTCATTGATGCTATGATGTTCACATCTGATTGGCTACTAACAATCTAGTTGTAAATGGCCACATTTACAGGT<br>AGTTA-TGAGTGAGTAGGTTCTTATAGGT----ATTCGGGTAAACAGGGAAAGATTATTTATGCCCTAGATTGATTTGATAAT |      |      |      |      |      |      |      |      |  |
|                                                                         |                 | Section 26                                                                                                                                                                 |      |      |      |      |      |      |      |      |  |
| SARS-CoV-2 Reference Genome NC_045512.2<br>Fig badnavirus 1 NC_017830.1 | (2076)          | 2076                                                                                                                                                                       | 2090 | 2100 | 2110 | 2120 | 2130 | 2140 | 2158 |      |  |
|                                                                         | (2075)<br>(92)  | GGTGTTCAGTTGACT---TCGCAGTGGCTAACT-----AACATCTTGGCACTGTTTATGAAAAACTCA--AACCCGTCC<br>CTTGTTCAGATCTCTGAGTTGTAGTATCTAAAGGAAAAAGTCTTGGCACTATATCTGGTTAAGGCAGGAAGGCCGT--          |      |      |      |      |      |      |      |      |  |
|                                                                         |                 | Section 27                                                                                                                                                                 |      |      |      |      |      |      |      |      |  |
| SARS-CoV-2 Reference Genome NC_045512.2<br>Fig badnavirus 1 NC_017830.1 | (2159)          | 2159                                                                                                                                                                       | 2170 | 2180 | 2190 | 2200 | 2210 | 2220 | 2230 | 2241 |  |
|                                                                         | (2148)<br>(173) | TGTATGGCTTGAAAGAGAAAGTTTAAGGAAGGTGTAGAGTTTCTTAGAGACGGTTGGGAAATTTTAAATTTATCTCAACCTGT<br>GTGATACCAGTGAA-----ACCTGAGGTGATCCTGATGGATATGAGTCATGTCGAGAAATGGGAAGGTCATTCAGGAT-T    |      |      |      |      |      |      |      |      |  |
|                                                                         |                 | Section 28                                                                                                                                                                 |      |      |      |      |      |      |      |      |  |
| SARS-CoV-2 Reference Genome NC_045512.2<br>Fig badnavirus 1 NC_017830.1 | (2242)          | 2242                                                                                                                                                                       | 2250 | 2260 | 2270 | 2280 | 2290 | 2300 | 2310 | 2324 |  |
|                                                                         | (2231)<br>(251) | GCTTGTGAATTGTCTGGTGACAAATGTCACTGTGCAAAGGAAATTAAGGAGAGTTGTTCAGACATTCTTTAAGCTTGTA<br>GGTATAATAAATCTAG-----AACTGCGAACCTTG-----AATACCTTGATTAGCAGAAAGGAAAAC-----AA              |      |      |      |      |      |      |      |      |  |

SARS-CoV-2 & Fig badnavirus 1.apr

|                                         |        |            |       |      |       |       |       |       |       |        |       |      |        |        |       |        |       |      |       |       |       |        |     |      |        |      |      |      |     |       |      |        |     |     |     |    |      |    |     |     |    |     |     |    |    |   |
|-----------------------------------------|--------|------------|-------|------|-------|-------|-------|-------|-------|--------|-------|------|--------|--------|-------|--------|-------|------|-------|-------|-------|--------|-----|------|--------|------|------|------|-----|-------|------|--------|-----|-----|-----|----|------|----|-----|-----|----|-----|-----|----|----|---|
|                                         |        | Section 29 |       |      |       |       |       |       |       |        |       |      |        |        |       |        |       |      |       |       |       |        |     |      |        |      |      |      |     |       |      |        |     |     |     |    |      |    |     |     |    |     |     |    |    |   |
|                                         |        | (2325)     | 2325  | 2330 | 2340  | 2350  | 2360  | 2370  | 2380  | 2390   | 2407  |      |        |        |       |        |       |      |       |       |       |        |     |      |        |      |      |      |     |       |      |        |     |     |     |    |      |    |     |     |    |     |     |    |    |   |
| SARS-CoV-2 Reference Genome NC_045512.2 | (2314) | T          | AAATT | T    | TGG   | CTTT  | GTGTG | CTGAC | TCTAT | CATTAT | TGGTG | GAGC | TAAACT | TAAAG  | CCTTG | AATT   | TAG   | GTGA | AAAC  | ATTTG | TCA   |        |     |      |        |      |      |      |     |       |      |        |     |     |     |    |      |    |     |     |    |     |     |    |    |   |
| Fig badnavirus 1 NC_017830.1            | (314)  | C          | AAATT | C    | TCAC  | CTTT  | ---   | AC    | CAT   | AA     | TCTA  | G    | CAG    | TAG    | T     | TAC    | GA    | --   | TAG   | ACT   | AAA   | --     | CT  | TGC  | AAT    | C    | TCG  | TGTT | AAC | C     | T    | CAAAAA | A   |     |     |    |      |    |     |     |    |     |     |    |    |   |
|                                         |        | Section 30 |       |      |       |       |       |       |       |        |       |      |        |        |       |        |       |      |       |       |       |        |     |      |        |      |      |      |     |       |      |        |     |     |     |    |      |    |     |     |    |     |     |    |    |   |
|                                         |        | (2408)     | 2408  | 2420 | 2430  | 2440  | 2450  | 2460  | 2470  | 2480   | 2490  |      |        |        |       |        |       |      |       |       |       |        |     |      |        |      |      |      |     |       |      |        |     |     |     |    |      |    |     |     |    |     |     |    |    |   |
| SARS-CoV-2 Reference Genome NC_045512.2 | (2397) | C          | GCA   | CT   | CAA   | AGG   | GATT  | G     | TAC   | AGAAAG | T     | GTG  | TT     | AAA    | T     | C      | AGAGA | AG   | AAACT | G     | CCTAC | T      | CA  | TGC  | CT     | CT   | AAA  | AGC  | CCC | AA    | AAG  | A      | A   |     |     |    |      |    |     |     |    |     |     |    |    |   |
| Fig badnavirus 1 NC_017830.1            | (390)  | C          | ---   | CT   | T     | AA    | GG    | T     | ATT   | T      | --    | AG   | AA     | AG     | A     | G      | TG    | G    | AAAA  | C     | A     | AG     | AG  | A    | G      | A    | AA   | AA   | CT  | T     | ---  | AG     | C   | AGT | AA  | GG | A    | C  |     |     |    |     |     |    |    |   |
|                                         |        | Section 31 |       |      |       |       |       |       |       |        |       |      |        |        |       |        |       |      |       |       |       |        |     |      |        |      |      |      |     |       |      |        |     |     |     |    |      |    |     |     |    |     |     |    |    |   |
|                                         |        | (2491)     | 2491  | 2500 | 2510  | 2520  | 2530  | 2540  | 2550  | 2560   | 2573  |      |        |        |       |        |       |      |       |       |       |        |     |      |        |      |      |      |     |       |      |        |     |     |     |    |      |    |     |     |    |     |     |    |    |   |
| SARS-CoV-2 Reference Genome NC_045512.2 | (2480) | A          | TTA   | T    | CTTCT | T     | AGAG  | G     | GA    | GAAA   | C     | ACTT | CC     | CACAGA | AAG   | T      | GT    | T    | AA    | CA    | GAG   | GAAGTT | G   | TCTT | G      | AAAA | CT   | GG   | TG  | ATT   | TAC  | AA     | CC  | AT  | T   |    |      |    |     |     |    |     |     |    |    |   |
| Fig badnavirus 1 NC_017830.1            | (463)  | C          | TTA   | C    | CCAAG | T     | TTTT  | G     | TT    | G      | AAA   | A    | T      | AAG    | CC    | TT     | ----  | T    | AA    | C     | AA    | C      | A   | CT   | GAAGTT | A    | ---- | G    | AA  | GG    | CT   | --     | TG  | TT  | ACG | AA | AT   | C  | T   |     |    |     |     |    |    |   |
|                                         |        | Section 32 |       |      |       |       |       |       |       |        |       |      |        |        |       |        |       |      |       |       |       |        |     |      |        |      |      |      |     |       |      |        |     |     |     |    |      |    |     |     |    |     |     |    |    |   |
|                                         |        | (2574)     | 2574  | 2580 | 2590  | 2600  | 2610  | 2620  | 2630  | 2640   | 2656  |      |        |        |       |        |       |      |       |       |       |        |     |      |        |      |      |      |     |       |      |        |     |     |     |    |      |    |     |     |    |     |     |    |    |   |
| SARS-CoV-2 Reference Genome NC_045512.2 | (2563) | A          | G     | AA   | CAACC | T     | ACTAG | T     | GAAG  | C      | TGTT  | GA   | AGCTC  | C      | ATT   | G      | GT    | TGG  | TAC   | ACC   | AG    | TTT    | GT  | -    | ATT    | AA   | CGG  | G    | CTT | AT    | GTTG | CT     | -   | CG  | AA  | T  |      |    |     |     |    |     |     |    |    |   |
| Fig badnavirus 1 NC_017830.1            | (534)  | T          | C     | A    | G     | CAACC | A     | A     | AGCT  | TG     | T     | AG   | AGCAG  | G      | A     | G      | CTC   | T    | A     | AG    | G     | T      | T   | AACT | T      | GA   | AG   | A    | CTT | C     | GT   | C      | AAA | AA  | CT  | C  | G    | AA | AG  | A   | G  | TTG | AGG | CG | AT | A |
|                                         |        | Section 33 |       |      |       |       |       |       |       |        |       |      |        |        |       |        |       |      |       |       |       |        |     |      |        |      |      |      |     |       |      |        |     |     |     |    |      |    |     |     |    |     |     |    |    |   |
|                                         |        | (2657)     | 2657  | 2670 | 2680  | 2690  | 2700  | 2710  | 2720  | 2739   |       |      |        |        |       |        |       |      |       |       |       |        |     |      |        |      |      |      |     |       |      |        |     |     |     |    |      |    |     |     |    |     |     |    |    |   |
| SARS-CoV-2 Reference Genome NC_045512.2 | (2644) | C          | AAAGA | C    | ACAGA | AAAGT | AC    | TG    | TG    | CC     | CT    | T    | G      | CA     | CCTA  | ATA    | T     | GAT  | GG    | TAA   | C     | AAA    | CAA | TAC  | CTT    | C    | ACA  | -    | CT  | CA    | AA   | GG     | C   | GG  | TG  | CA | CC   | A  |     |     |    |     |     |    |    |   |
| Fig badnavirus 1 NC_017830.1            | (617)  | T          | AAAGA | A    | AGTTG | AAAGT | --    | TG    | GA    | CC     | T     | C    | T      | CA     | TG    | AGT    | AG    | T    | TAT   | AT    | T     | GT     | C   | TCC  | CAA    | GGG  | ACAA | A    | T   | AG    | CT   | AC     | AA  | GG  | A   | GG | ---- | CC | -   |     |    |     |     |    |    |   |
|                                         |        | Section 34 |       |      |       |       |       |       |       |        |       |      |        |        |       |        |       |      |       |       |       |        |     |      |        |      |      |      |     |       |      |        |     |     |     |    |      |    |     |     |    |     |     |    |    |   |
|                                         |        | (2740)     | 2740  | 2750 | 2760  | 2770  | 2780  | 2790  | 2800  | 2810   | 2822  |      |        |        |       |        |       |      |       |       |       |        |     |      |        |      |      |      |     |       |      |        |     |     |     |    |      |    |     |     |    |     |     |    |    |   |
| SARS-CoV-2 Reference Genome NC_045512.2 | (2726) | A          | C     | AAA  | G     | GT    | TACT  | TTT   | GG    | TGAT   | GA    | CA   | C      | TGTGAT | AG    | AAG    | T     | G    | CAAG  | G     | TT    | CA     | AG  | AG   | TGT    | GA   | A    | TAT  | CA  | CTTTT | GA   | ACT    | T   | --  | GAT | G  | AA   |    |     |     |    |     |     |    |    |   |
| Fig badnavirus 1 NC_017830.1            | (693)  | A          | T     | AAA  | A     | G     | TACT  | G     | AA    | GG     | AA    | TA   | GA     | T      | C     | CCCAGC | AG    | C    | AG    | GG    | TTC   | G      | -   | TG   | AG     | ACC  | AG   | CC   | -   | GA    | CTTC | CA     | GGG | GAG | GA  | AC | A    | T  | CGG | CAG | CG |     |     |    |    |   |
|                                         |        | Section 35 |       |      |       |       |       |       |       |        |       |      |        |        |       |        |       |      |       |       |       |        |     |      |        |      |      |      |     |       |      |        |     |     |     |    |      |    |     |     |    |     |     |    |    |   |
|                                         |        | (2823)     | 2823  | 2830 | 2840  | 2850  | 2860  | 2870  | 2880  | 2890   | 2905  |      |        |        |       |        |       |      |       |       |       |        |     |      |        |      |      |      |     |       |      |        |     |     |     |    |      |    |     |     |    |     |     |    |    |   |
| SARS-CoV-2 Reference Genome NC_045512.2 | (2807) | A          | GG    | G    | ATT   | --    | GAT   | AAAG  | T     | ACTTA  | T     | GA   | GAAGT  | GC     | TC    | T      | GC    | CT   | A     | TA    | CAG   | T      | TG  | AAC  | TCG    | G    | TAC  | AGA  | AG  | TAA   | AT   | GA     | GT  | TC  | G   | C  | T    | G  | T   | G   | T  | T   |     |    |    |   |
| Fig badnavirus 1 NC_017830.1            | (774)  | A          | GGG   | TT   | CA    | GAT   | T     | AAG   | CA    | GAAT   | A     | TA   | CCCT   | TAT    | TC    | AG     | CT    | T    | CTA   | --    | AT    | CC     | AGA | TCG  | CT     | G    | AGT  | CCCC | TG  | AAG   | GA   | CATC   | -   | CG  | A   | GA | GA   |    |     |     |    |     |     |    |    |   |

SARS-CoV-2 & Fig badnavirus 1.apr

|                                                                         |        |                                                                                           |      |      |      |      |      |      |      |      |  |
|-------------------------------------------------------------------------|--------|-------------------------------------------------------------------------------------------|------|------|------|------|------|------|------|------|--|
|                                                                         |        | Section 36                                                                                |      |      |      |      |      |      |      |      |  |
| SARS-CoV-2 Reference Genome NC_045512.2<br>Fig badnavirus 1 NC_017830.1 | (2906) | 2906                                                                                      | 2920 | 2930 | 2940 | 2950 | 2960 | 2970 | 2988 |      |  |
|                                                                         | (2888) | GTGGCAGATGCTGTCATAAAACTTTGCAACCAAGTATCTGAATTA-----CTTACACCACGTGGCAATTGATTAGATGAGTGG       |      |      |      |      |      |      |      |      |  |
|                                                                         | (854)  | GCAGCGAGTCTCTAAAGGAGGAGGTTAGGCCAACTGCAGGAAGGACAAAGCAGCTTCAATCACAGAAGAGCTTGTTGGAAGAAGACTTC |      |      |      |      |      |      |      |      |  |
|                                                                         |        | Section 37                                                                                |      |      |      |      |      |      |      |      |  |
| SARS-CoV-2 Reference Genome NC_045512.2<br>Fig badnavirus 1 NC_017830.1 | (2989) | 2989                                                                                      | 3000 | 3010 | 3020 | 3030 | 3040 | 3050 | 3060 | 3071 |  |
|                                                                         | (2966) | AGTATGGCTACATACTACTT--ATTGTATGAGTCTGGTGGAGTTTAAATTGGCTTACACA--TATGTATTGTTCTTTCTACCCTC     |      |      |      |      |      |      |      |      |  |
|                                                                         | (937)  | AAAGTCTCTCGTTAGGAGTCCCAGAAAGAAAGGTAGCTGGAGAAGAAAAGAACTTTTAGGGTATTCAAAAGACCTTTTAGAAGATC    |      |      |      |      |      |      |      |      |  |
|                                                                         |        | Section 38                                                                                |      |      |      |      |      |      |      |      |  |
| SARS-CoV-2 Reference Genome NC_045512.2<br>Fig badnavirus 1 NC_017830.1 | (3072) | 3072                                                                                      | 3080 | 3090 | 3100 | 3110 | 3120 | 3130 | 3140 | 3154 |  |
|                                                                         | (3045) | CA-GATGAGGATGAAGAAGAAGGTG--ATTGTGAAGAAAGAAAGAGTT--TGAGCCATCAACT-CAA--TATGAGTATGGTACT      |      |      |      |      |      |      |      |      |  |
|                                                                         | (1020) | CTTGAAGAGGGAAGAAGAA-AAGCTGCCAAAATGAAACAGGTCGAGAACGGTGACTCAGCAGCTGCCAGCTGTGAGTACCAGACG     |      |      |      |      |      |      |      |      |  |
|                                                                         |        | Section 39                                                                                |      |      |      |      |      |      |      |      |  |
| SARS-CoV-2 Reference Genome NC_045512.2<br>Fig badnavirus 1 NC_017830.1 | (3155) | 3155                                                                                      | 3160 | 3170 | 3180 | 3190 | 3200 | 3210 | 3220 | 3237 |  |
|                                                                         | (3119) | GAAG-ATGA--TTACCAAGG-TAAACCTTFGAATTTGGTGCCACTTCTGTCTCTTTCAACCTGAAGAAAGAGC                 |      |      |      |      |      |      |      |      |  |
|                                                                         | (1102) | GAGGGAAGAATAAACAAGGATCAACCTCTG----TTCGAGG---ATCAGATCCGTGACTACCGAGAGGAATCA-AAGGCGAAG       |      |      |      |      |      |      |      |      |  |
|                                                                         |        | Section 40                                                                                |      |      |      |      |      |      |      |      |  |
| SARS-CoV-2 Reference Genome NC_045512.2<br>Fig badnavirus 1 NC_017830.1 | (3238) | 3238                                                                                      | 3250 | 3260 | 3270 | 3280 | 3290 | 3300 | 3310 | 3320 |  |
|                                                                         | (3198) | ATTGGTTAGATGATGATAGTCAACAAACTGTGGTCAACAAAGACGG-CAGTGAGGACAATCAGACAACACTATTCAAACAAAT       |      |      |      |      |      |      |      |      |  |
|                                                                         | (1177) | GTTTGT-AGCTGA-----A-CAAGCCGT-----AAGACGAAACCATGGGAAGAATGCAGGACGACGATACAAACCAA             |      |      |      |      |      |      |      |      |  |
|                                                                         |        | Section 41                                                                                |      |      |      |      |      |      |      |      |  |
| SARS-CoV-2 Reference Genome NC_045512.2<br>Fig badnavirus 1 NC_017830.1 | (3321) | 3321                                                                                      | 3330 | 3340 | 3350 | 3360 | 3370 | 3380 | 3390 | 3403 |  |
|                                                                         | (3280) | TGTTGAGGTTCAACCTCAATT-AGAGATGGAACCTTACAGCAGTGTGTTAG--ACTATTGAAGTGAAATAGTTTTTAGTGTTATT     |      |      |      |      |      |      |      |      |  |
|                                                                         | (1242) | CTCTGGAGCAGATCGTAGATCCAGAGGTAGAGCTGAACCAATCTATGAGGAAGAGCGAAACCTAGTACCCTGCAGAAAGTTCTTG     |      |      |      |      |      |      |      |      |  |
|                                                                         |        | Section 42                                                                                |      |      |      |      |      |      |      |      |  |
| SARS-CoV-2 Reference Genome NC_045512.2<br>Fig badnavirus 1 NC_017830.1 | (3404) | 3404                                                                                      | 3410 | 3420 | 3430 | 3440 | 3450 | 3460 | 3470 | 3486 |  |
|                                                                         | (3360) | TAAAACTTACT----GACAAATGATATAC-ATTAAAAATGCAAGACATGTGTG--GAAAGAGCTAAAA-----AAGGTAAACCA      |      |      |      |      |      |      |      |      |  |
|                                                                         | (1325) | TACCGCTCAAGAAGAAGACAAATAAACCATCAGATCTTATAATCATAGATCCGAGGAAGCGATGCTTTGTGTAGGAGAAACAGCA     |      |      |      |      |      |      |      |      |  |

SARS-CoV-2 & Fig badnavirus 1.apr

|                                         |        |                                                                                          |      |      |      |      |      |      |      |      |      |
|-----------------------------------------|--------|------------------------------------------------------------------------------------------|------|------|------|------|------|------|------|------|------|
|                                         |        | Section 43                                                                               |      |      |      |      |      |      |      |      |      |
|                                         |        | (3487)                                                                                   | 3487 | 3500 | 3510 | 3520 | 3530 | 3540 | 3550 | 3569 |      |
| SARS-CoV-2 Reference Genome NC_045512.2 | (3428) | ACAGTGGTGGTTAATGACGCCAAT--GTTACCTTAAACATGGAGGAGGTGT-TGCAGGAGCCTTAAATAAGGCTACTAACAAC      |      |      |      |      |      |      |      |      |      |
| Fig badnavirus 1 NC_017830.1            | (1408) | AGACAAGGATGGTTATCCAACTAACAGCTTCCAAAGAACTACAAGGAGTGTATGTCAGTT--CATACATCTGGAGGTT-----      |      |      |      |      |      |      |      |      |      |
|                                         |        | Section 44                                                                               |      |      |      |      |      |      |      |      |      |
|                                         |        | (3570)                                                                                   | 3570 | 3580 | 3590 | 3600 | 3610 | 3620 | 3630 | 3640 | 3652 |
| SARS-CoV-2 Reference Genome NC_045512.2 | (3508) | TGCCA TGCAAGTT-GAATCTGATGATTACATAGCTACTAATGGACCCTTAAAGTGGGTGGTAGTTGTGTTTTAAGCGGACAC      |      |      |      |      |      |      |      |      |      |
| Fig badnavirus 1 NC_017830.1            | (1485) | -----TGCAAGTAAAGCTCCAGATACCTGTCATAGGG-CAGATGGAGGAAAC-AATGGCCTGGTAGTCTT-----CAG           |      |      |      |      |      |      |      |      |      |
|                                         |        | Section 45                                                                               |      |      |      |      |      |      |      |      |      |
|                                         |        | (3653)                                                                                   | 3653 | 3660 | 3670 | 3680 | 3690 | 3700 | 3710 | 3720 | 3735 |
| SARS-CoV-2 Reference Genome NC_045512.2 | (3590) | AATCTTGC TAAACAC TGTCTTCATGTTGTCGGCCCAATGTTAA CAAAGGTGAAGACATTTCACTTCTTAAGAGTGCTTATGA    |      |      |      |      |      |      |      |      |      |
| Fig badnavirus 1 NC_017830.1            | (1549) | A-----GATAAACCGATGGG--AAGGAGATCAGTC--AATCTTCGCAATCT--CAGAAGTTGA-CTTGACTAGAG-GATC--GC     |      |      |      |      |      |      |      |      |      |
|                                         |        | Section 46                                                                               |      |      |      |      |      |      |      |      |      |
|                                         |        | (3736)                                                                                   | 3736 | 3750 | 3760 | 3770 | 3780 | 3790 | 3800 | 3818 |      |
| SARS-CoV-2 Reference Genome NC_045512.2 | (3673) | AAATTTTAATCAGCACGAA GTTCTACTTG-CACCATTTATTTATCAGCTGGTATTTTGGTGCTGACCTTATACAT-TCTTTAAG    |      |      |      |      |      |      |      |      |      |
| Fig badnavirus 1 NC_017830.1            | (1617) | AAATAGTATAC-----GTGATACCTGACACGATGATGATTTATCGGTGACTTCTACAG--AACGTTCAAGATCTCTATCCA        |      |      |      |      |      |      |      |      |      |
|                                         |        | Section 47                                                                               |      |      |      |      |      |      |      |      |      |
|                                         |        | (3819)                                                                                   | 3819 | 3830 | 3840 | 3850 | 3860 | 3870 | 3880 | 3890 | 3901 |
| SARS-CoV-2 Reference Genome NC_045512.2 | (3754) | AGTTTGTGTATGAT-ACGTGTTCCGACAAATGTTCTACTTAGCTGTTCTTTGATATAAAATCTCTATGACAAACTTGTT-TCAGCTT  |      |      |      |      |      |      |      |      |      |
| Fig badnavirus 1 NC_017830.1            | (1690) | GACCA GTGGATATGAGAAATTGCGAGAA-TGGAGAGGC AAATTTGCT-GATCACAAAGAGGCATGACGGGAAGGTTATCCAAACAC |      |      |      |      |      |      |      |      |      |
|                                         |        | Section 48                                                                               |      |      |      |      |      |      |      |      |      |
|                                         |        | (3902)                                                                                   | 3902 | 3910 | 3920 | 3930 | 3940 | 3950 | 3960 | 3970 | 3984 |
| SARS-CoV-2 Reference Genome NC_045512.2 | (3835) | TTTGG AAATGAAGAGTGA AAAAGCAAGTTGAA CAAAGATCGCTGAGATT-CCTAAAGAGGAAGTTAAGCCAATT-TATAACTGA  |      |      |      |      |      |      |      |      |      |
| Fig badnavirus 1 NC_017830.1            | (1771) | TC--CAAATGTTG---GATTTGCTTACAGAAATAAGCCATGTGACGGATTACCTAGCAAGCAGGGGAGTCCAAGCTTTGTCGGG     |      |      |      |      |      |      |      |      |      |
|                                         |        | Section 49                                                                               |      |      |      |      |      |      |      |      |      |
|                                         |        | (3985)                                                                                   | 3985 | 3990 | 4000 | 4010 | 4020 | 4030 | 4040 | 4050 | 4067 |
| SARS-CoV-2 Reference Genome NC_045512.2 | (3916) | AAGTAACCTTCAGTTGAACAGAGAAAACAGATGATAGAAAAATCAAGCTTGTGTTGAAGAAGTTACAA-CAACTCTGGAA         |      |      |      |      |      |      |      |      |      |
| Fig badnavirus 1 NC_017830.1            | (1849) | AAG--AAGATACAG---ATCGGAGATGCTACGAGGA--AGAAAACTGGATCATTAAGGCA GCCACAGATCCAGGCGGCAATGATG   |      |      |      |      |      |      |      |      |      |

SARS-CoV-2 & Fig badnavirus 1.apr

|                                                                         |        |            |      |      |      |      |      |      |      |      |      |
|-------------------------------------------------------------------------|--------|------------|------|------|------|------|------|------|------|------|------|
|                                                                         |        | Section 50 |      |      |      |      |      |      |      |      |      |
| SARS-CoV-2 Reference Genome NC_045512.2<br>Fig badnavirus 1 NC_017830.1 | (4068) | 4068       | 4080 | 4090 | 4100 | 4110 | 4120 | 4130 | 4140 | 4150 |      |
|                                                                         | (3998) | GA         | AACT | AA   | GT   | CC   | TC   | ACA  | GAA  | AACT | TG   |
|                                                                         | (1925) | CC         | AA   | GG   | AA   | CG   | TG   | GAA  | ACA  | AGG  | AACT |
|                                                                         | (1925) | CC         | AA   | GG   | AA   | CG   | TG   | GAA  | ACA  | AGG  | AACT |
|                                                                         |        | Section 51 |      |      |      |      |      |      |      |      |      |
| SARS-CoV-2 Reference Genome NC_045512.2<br>Fig badnavirus 1 NC_017830.1 | (4151) | 4151       | 4160 | 4170 | 4180 | 4190 | 4200 | 4210 | 4220 | 4233 |      |
|                                                                         | (4081) | T          | GA   | -    | C    | A    | T    | T    | G    | A    | C    |
|                                                                         | (1999) | A          | GA   | A    | C    | A    | C    | A    | C    | A    | T    |
|                                                                         | (1999) | A          | GA   | A    | C    | A    | C    | A    | C    | A    | T    |
|                                                                         |        | Section 52 |      |      |      |      |      |      |      |      |      |
| SARS-CoV-2 Reference Genome NC_045512.2<br>Fig badnavirus 1 NC_017830.1 | (4234) | 4234       | 4240 | 4250 | 4260 | 4270 | 4280 | 4290 | 4300 | 4316 |      |
|                                                                         | (4163) | G          | T    | T    | A    | T    | A    | C    | T    | A    | A    |
|                                                                         | (2078) | ---        | C    | A    | T    | A    | G    | T    | A    | G    | C    |
|                                                                         | (2078) | ---        | C    | A    | T    | A    | G    | T    | A    | G    | C    |
|                                                                         |        | Section 53 |      |      |      |      |      |      |      |      |      |
| SARS-CoV-2 Reference Genome NC_045512.2<br>Fig badnavirus 1 NC_017830.1 | (4317) | 4317       | 4330 | 4340 | 4350 | 4360 | 4370 | 4380 | 4399 |      |      |
|                                                                         | (4242) | T          | A    | A    | C    | C    | A    | T    | T    | A    | A    |
|                                                                         | (2155) | C          | A    | A    | G    | T    | A    | A    | G    | T    | A    |
|                                                                         | (2155) | C          | A    | A    | G    | T    | A    | A    | G    | T    | A    |
|                                                                         |        | Section 54 |      |      |      |      |      |      |      |      |      |
| SARS-CoV-2 Reference Genome NC_045512.2<br>Fig badnavirus 1 NC_017830.1 | (4400) | 4400       | 4410 | 4420 | 4430 | 4440 | 4450 | 4460 | 4470 | 4482 |      |
|                                                                         | (4325) | T          | A    | C    | A    | T    | T    | C    | T    | A    | C    |
|                                                                         | (2225) | T          | A    | C    | A    | T    | T    | C    | T    | A    | C    |
|                                                                         | (2225) | T          | A    | C    | A    | T    | T    | C    | T    | A    | C    |
|                                                                         |        | Section 55 |      |      |      |      |      |      |      |      |      |
| SARS-CoV-2 Reference Genome NC_045512.2<br>Fig badnavirus 1 NC_017830.1 | (4483) | 4483       | 4490 | 4500 | 4510 | 4520 | 4530 | 4540 | 4550 | 4565 |      |
|                                                                         | (4408) | T          | G    | C    | A    | G    | A    | A    | C    | A    | C    |
|                                                                         | (2305) | A          | C    | C    | G    | A    | C    | A    | A    | T    | C    |
|                                                                         | (2305) | A          | C    | C    | G    | A    | C    | A    | A    | T    | C    |
|                                                                         |        | Section 56 |      |      |      |      |      |      |      |      |      |
| SARS-CoV-2 Reference Genome NC_045512.2<br>Fig badnavirus 1 NC_017830.1 | (4566) | 4566       | 4580 | 4590 | 4600 | 4610 | 4620 | 4630 | 4648 |      |      |
|                                                                         | (4491) | T          | T    | A    | A    | A    | T    | A    | C    | A    | A    |
|                                                                         | (2383) | T          | C    | A    | A    | ---  | C    | A    | G    | A    | T    |
|                                                                         | (2383) | T          | C    | A    | A    | ---  | C    | A    | G    | A    | T    |



SARS-CoV-2 & Fig badnavirus 1.apr

|                                         |        |                                                                                                           |      |      |      |      |      |      |      |      |      |
|-----------------------------------------|--------|-----------------------------------------------------------------------------------------------------------|------|------|------|------|------|------|------|------|------|
|                                         |        | Section 57                                                                                                |      |      |      |      |      |      |      |      |      |
|                                         |        | (4649)                                                                                                    | 4649 | 4660 | 4670 | 4680 | 4690 | 4700 | 4710 | 4720 | 4731 |
| SARS-CoV-2 Reference Genome NC_045512.2 | (4573) | CACA CT TAAC GATC TAAAT GAAAC TCT TGTT ACAATG CC ACT TGG CTAT GT AACAC ATG GCTT AAATTTGG AAG AAG CT GC TC |      |      |      |      |      |      |      |      |      |
| Fig badnavirus 1 NC_017830.1            | (2461) | GAAAGATGACCAT TAAAT ----- TCT GAAGA AATG G- ACT ACC C -- GCAAAGAATGAAGA AAATAGAA AAG TTA CT A- TC         |      |      |      |      |      |      |      |      |      |
|                                         |        | Section 58                                                                                                |      |      |      |      |      |      |      |      |      |
|                                         |        | (4732)                                                                                                    | 4732 | 4740 | 4750 | 4760 | 4770 | 4780 | 4790 | 4800 | 4814 |
| SARS-CoV-2 Reference Genome NC_045512.2 | (4656) | GGTATA TGAGATCTCTCAAAGTGCCAGCTACAGTTTCTGTTTCTTCACTGATGCTGTTACAGCGTATAATGTTATCTTACT                        |      |      |      |      |      |      |      |      |      |
| Fig badnavirus 1 NC_017830.1            | (2533) | CACCAGTGAGGTAACT---AGT-CCA--TACAGAC-----CACAGAAATGTCAGCCATGGGAAGACCAAGTTATC---CA                          |      |      |      |      |      |      |      |      |      |
|                                         |        | Section 59                                                                                                |      |      |      |      |      |      |      |      |      |
|                                         |        | (4815)                                                                                                    | 4815 | 4820 | 4830 | 4840 | 4850 | 4860 | 4870 | 4880 | 4897 |
| SARS-CoV-2 Reference Genome NC_045512.2 | (4739) | TCTTCTTCTAAACACCTGAAGAACATTTTATTGAAACCATCTCACTTGCTGGTTCTTATAAAGATTGGTCTATTCTGGACA                         |      |      |      |      |      |      |      |      |      |
| Fig badnavirus 1 NC_017830.1            | (2600) | CAGCTAGGACAAATCCAGGAGGA-----GGGGCAAGCTCAAGCTGTAACCTCCAAAGTTTGATGCAAGCCAGAACAA                             |      |      |      |      |      |      |      |      |      |
|                                         |        | Section 60                                                                                                |      |      |      |      |      |      |      |      |      |
|                                         |        | (4898)                                                                                                    | 4898 | 4910 | 4920 | 4930 | 4940 | 4950 | 4960 | 4970 | 4980 |
| SARS-CoV-2 Reference Genome NC_045512.2 | (4822) | ATCTACACA ACTAGGTATGAATTTCTTAAGAGAGGTGATAAAAGTGTATATTACACTAGTAATCCTACCAATTCACCTAG                         |      |      |      |      |      |      |      |      |      |
| Fig badnavirus 1 NC_017830.1            | (2672) | AGATTTTAAAG--GGGATACAATGAGAGAT-GTGGACACTAACCATCAGCCCAACAGAG-AATGGAGCCAATGTTCTGTAATAC                      |      |      |      |      |      |      |      |      |      |
|                                         |        | Section 61                                                                                                |      |      |      |      |      |      |      |      |      |
|                                         |        | (4981)                                                                                                    | 4981 | 4990 | 5000 | 5010 | 5020 | 5030 | 5040 | 5050 | 5063 |
| SARS-CoV-2 Reference Genome NC_045512.2 | (4905) | ATG GTGAAGTTATCACCTTGACAACTCTTAAAGACACTTCTTCTTTGAGAGAA GTGAGGACTATTAAAGGTGTTTACAACAGTA                    |      |      |      |      |      |      |      |      |      |
| Fig badnavirus 1 NC_017830.1            | (2751) | CAG-----AACAACTTGCGCTATTCATGATGCTT-TCTCTAGATGGAA TCAGTC ACTAAAACCATGTGGCTACACAA                           |      |      |      |      |      |      |      |      |      |
|                                         |        | Section 62                                                                                                |      |      |      |      |      |      |      |      |      |
|                                         |        | (5064)                                                                                                    | 5064 | 5070 | 5080 | 5090 | 5100 | 5110 | 5120 | 5130 | 5146 |
| SARS-CoV-2 Reference Genome NC_045512.2 | (4988) | GACAACATTAA CCTCCACACGCAA GTTGTGGACATGTC AATGACATAT GGACAA CAGTTTGGTCCAACTTATTTGGATGGAGC                  |      |      |      |      |      |      |      |      |      |
| Fig badnavirus 1 NC_017830.1            | (2825) | GTTTTTAC TGATACCCGAGATAAAATAAAGTACATGGA AATCTACTC GGAGAAA----TTGAGAAGCTGATTTGGATACAGT                     |      |      |      |      |      |      |      |      |      |
|                                         |        | Section 63                                                                                                |      |      |      |      |      |      |      |      |      |
|                                         |        | (5147)                                                                                                    | 5147 | 5160 | 5170 | 5180 | 5190 | 5200 | 5210 | 5229 |      |
| SARS-CoV-2 Reference Genome NC_045512.2 | (5071) | TGA TGTTACTAAAA TAAAA CCTCAT AATTCACAT GAAG GTAAACATTTTATGTTTTACCTAATGATGACACTCTACGTGTTG                  |      |      |      |      |      |      |      |      |      |
| Fig badnavirus 1 NC_017830.1            | (2904) | GAG---AATGACGTATG-CCAGGGAATAC----GAAGCCTTAGTAGCCATCGGAGAGGCAGGATGGTACTCA-----                             |      |      |      |      |      |      |      |      |      |

SARS-CoV-2 & Fig badnavirus 1.apr

|                                                                         |        |            |              |             |            |              |               |                 |                |              |                   |
|-------------------------------------------------------------------------|--------|------------|--------------|-------------|------------|--------------|---------------|-----------------|----------------|--------------|-------------------|
|                                                                         |        | Section 64 |              |             |            |              |               |                 |                |              |                   |
| SARS-CoV-2 Reference Genome NC_045512.2<br>Fig badnavirus 1 NC_017830.1 | (5230) | 5230       | 5240         | 5250        | 5260       | 5270         | 5280          | 5290            | 5300           | 5312         |                   |
|                                                                         | (5154) | AGGCTTTT   | GAGTACTAC    | CACACAACTGA | TCCTAGT    | TTCTGGGTAG   | GTACATGTCA    | GCAATTAAATCACAC | TAAAAAGT       | GGAAA        |                   |
|                                                                         | (2971) | -----      | GAACATTCTCTG | CAAAATGA    | GAAGAGT    | TTTCTCT      | TAGAAGATCCGGC | GCA             | GGGTTTCGACAG   | TAA          | TCCAGGATGA        |
|                                                                         |        | Section 65 |              |             |            |              |               |                 |                |              |                   |
| SARS-CoV-2 Reference Genome NC_045512.2<br>Fig badnavirus 1 NC_017830.1 | (5313) | 5313       | 5320         | 5330        | 5340       | 5350         | 5360          | 5370            | 5380           | 5395         |                   |
|                                                                         | (5237) | TA         | CCACAGTTAA   | TGGTTTAACT  | TCTATTA    | AATGGGCAGATA | ACAACTG       | TTATCTTG        | CCACTGCATTGT   | TAA          | CAC               |
|                                                                         | (3046) | AG         | CTACAGAGAGT  | TGGAAAGAA   | TGCTGTAGAC | GTTAAAT      | ACATCA        | TTCCA           | TTCTAAATGAGTAT | TATG         | CGTTGGCA          |
|                                                                         |        | Section 66 |              |             |            |              |               |                 |                |              |                   |
| SARS-CoV-2 Reference Genome NC_045512.2<br>Fig badnavirus 1 NC_017830.1 | (5396) | 5396       | 5410         | 5420        | 5430       | 5440         | 5450          | 5460            | 5478           |              |                   |
|                                                                         | (5319) | AA         | ATAGAGTT     | GAAGTTTAA   | TCACCT     | TGCTCTAC     | AAGATGCT      | TATTACAGAG      | CAAGGGCTGG     | TGAAGCTGC    | TA---             |
|                                                                         | (3128) | GC         | AAAGACGG     | GAAGGCTAT   | TC         | ----         | TAG---        | GAGGAAC         | TAT--          | CTGAG        | AAGATCTGGA        |
|                                                                         |        | Section 67 |              |             |            |              |               |                 |                |              |                   |
| SARS-CoV-2 Reference Genome NC_045512.2<br>Fig badnavirus 1 NC_017830.1 | (5479) | 5479       | 5490         | 5500        | 5510       | 5520         | 5530          | 5540            | 5550           | 5561         |                   |
|                                                                         | (5397) | GTGCA      | CTTATCTT     | AGCCTACT    | GTAATAAG   | ACAGTAGGT    | G-AGT         | TAGGTGAT        | GTTAGAG        | AAA          | CAATGAGTTACTTGT   |
|                                                                         | (3201) | GAAA       | ACAAAT       | AAAAG       | ACTTTG     | ACAA         | CAATACCCAG    | AGT             | CGTATCAG       | GGT          | GTTACCA           |
|                                                                         |        | Section 68 |              |             |            |              |               |                 |                |              |                   |
| SARS-CoV-2 Reference Genome NC_045512.2<br>Fig badnavirus 1 NC_017830.1 | (5562) | 5562       | 5570         | 5580        | 5590       | 5600         | 5610          | 5620            | 5630           | 5644         |                   |
|                                                                         | (5479) | T          | CCAAATTTAGA  | TTCTTG      | CAAAAG     | AGTCTT       | GAACTGTG      | GTGTGTAA        | AACTT          | GTGACAA      | CAGCAGACAACCCTTA  |
|                                                                         | (3282) | AG         | -----        | TTCTTG      | GAGAAG     | -----        | GAA           | TGCAGAG         | ATGCAGCAT      | TTCAA        | GAGGTCCCTAAAGAACC |
|                                                                         |        | Section 69 |              |             |            |              |               |                 |                |              |                   |
| SARS-CoV-2 Reference Genome NC_045512.2<br>Fig badnavirus 1 NC_017830.1 | (5645) | 5645       | 5650         | 5660        | 5670       | 5680         | 5690          | 5700            | 5710           | 5727         |                   |
|                                                                         | (5562) | AAGCTG     | TATGTAC      | ATGGGCAC    | ACTTTCT    | TATGAA       | CAATTTAA      | GAAAG           | GTGTCA         | GATACCTT     | GTACGTGTGGTAA     |
|                                                                         | (3349) | TTCAAT     | TCC          | TACAGG      | ATAC       | -----        | TAT           | AA              | AAATACAGG      | CAAGAA       | GTATGGA           |
|                                                                         |        | Section 70 |              |             |            |              |               |                 |                |              |                   |
| SARS-CoV-2 Reference Genome NC_045512.2<br>Fig badnavirus 1 NC_017830.1 | (5728) | 5728       | 5740         | 5750        | 5760       | 5770         | 5780          | 5790            | 5800           | 5810         |                   |
|                                                                         | (5645) | ACAAA      | ATATCTAG     | TACACAG     | GAGTCA     | CCTTTT       | GTATGATGT     | CAGCAC          | CACCTGCTCAG    | TATGAACTTAAG | GCATGGTACATT      |
|                                                                         | (3417) | ACAAA      | G--G         | CAAGCCTC    | ACGAGAG    | CCATGCT      | TAGGAT        | TGAA            | AAGCGAAAG      | CACCTGGTC    | GCAACAAAAGATGCAAG |

SARS-CoV-2 & Fig badnavirus 1.apr

|                                                                         |        |            |        |        |           |          |         |        |         |          |       |                  |         |            |             |         |         |        |        |         |       |       |      |     |     |     |
|-------------------------------------------------------------------------|--------|------------|--------|--------|-----------|----------|---------|--------|---------|----------|-------|------------------|---------|------------|-------------|---------|---------|--------|--------|---------|-------|-------|------|-----|-----|-----|
|                                                                         |        | Section 71 |        |        |           |          |         |        |         |          |       |                  |         |            |             |         |         |        |        |         |       |       |      |     |     |     |
| SARS-CoV-2 Reference Genome NC_045512.2<br>Fig badnavirus 1 NC_017830.1 | (5811) | 5811       | 5820   | 5830   | 5840      | 5850     | 5860    | 5870   | 5880    | 5893     |       |                  |         |            |             |         |         |        |        |         |       |       |      |     |     |     |
|                                                                         | (5728) | TACTTGTC   | TAGTGA | GTACAC | TGGTAA    | TACAGTGT | GGTCACT | ATAAA  | CATATA  | CTCTAA   | AGAA  | ACTTTGTATTGCATAG |         |            |             |         |         |        |        |         |       |       |      |     |     |     |
|                                                                         | (3498) | TATGTGGA   | CAAGAA | GTCA   | TTGCAAGAA | --AGTGT  | CCTAATG | ATAAA  | ---AGG  | AGC      | TCTAA | -----A-----      |         |            |             |         |         |        |        |         |       |       |      |     |     |     |
|                                                                         |        | Section 72 |        |        |           |          |         |        |         |          |       |                  |         |            |             |         |         |        |        |         |       |       |      |     |     |     |
| SARS-CoV-2 Reference Genome NC_045512.2<br>Fig badnavirus 1 NC_017830.1 | (5894) | 5894       | 5900   | 5910   | 5920      | 5930     | 5940    | 5950   | 5960    | 5976     |       |                  |         |            |             |         |         |        |        |         |       |       |      |     |     |     |
|                                                                         | (5811) | ACGGTG     | CTTTAC | TTTAC  | AAAGTC    | CTCAGA   | ATAACA  | AGGTC  | CTATTAC | GGATG    | TTTCT | ACAAAGAA         | ACAGTT  | ACACAA     | CAACC       |         |         |        |        |         |       |       |      |     |     |     |
|                                                                         | (3557) | AGGATG     | GCTATG | TTTG   | AAAA      | TC       | TGGA    | AAATAC | CAAGAG  | ----ATTG | CG    | -ATATAG          | TCTCTGT | AGAA       | GAAG--AGAGG | ATATGA  |         |        |        |         |       |       |      |     |     |     |
|                                                                         |        | Section 73 |        |        |           |          |         |        |         |          |       |                  |         |            |             |         |         |        |        |         |       |       |      |     |     |     |
| SARS-CoV-2 Reference Genome NC_045512.2<br>Fig badnavirus 1 NC_017830.1 | (5977) | 5977       | 5990   | 6000   | 6010      | 6020     | 6030    | 6040   | 6059    |          |       |                  |         |            |             |         |         |        |        |         |       |       |      |     |     |     |
|                                                                         | (5894) | ATAAAA     | CCA    | GTTACT | TATA      | AAT      | TG      | GATGG  | TGTTGTT | TGTA     | CAGA  | AAT              | TGA     | CCTA       | AGTTGGA     | CAAT    | TATTAT  | AAGAA  | AGCAA  |         |       |       |      |     |     |     |
|                                                                         | (3633) | GTGATG     | CCA    | TATACT | CA        | -ATAT    | CCGA    | AGGAG  | AAGAT   | GGAG     | CAGA  | ---TGAG          | CTGC    | AGAAAT     | -CACT       | CCAA    | ACATTGG | AAATTG |        |         |       |       |      |     |     |     |
|                                                                         |        | Section 74 |        |        |           |          |         |        |         |          |       |                  |         |            |             |         |         |        |        |         |       |       |      |     |     |     |
| SARS-CoV-2 Reference Genome NC_045512.2<br>Fig badnavirus 1 NC_017830.1 | (6060) | 6060       | 6070   | 6080   | 6090      | 6100     | 6110    | 6120   | 6130    | 6142     |       |                  |         |            |             |         |         |        |        |         |       |       |      |     |     |     |
|                                                                         | (5977) | TTCTTAT    | TTCA   | CA     | GAGCA     | CCAAT    | TGA     | TCTT   | GTACC   | AAAC     | CAAC  | CATATC           | CAACG   | CAG        | CTTC        | GATA    | ATTTTAA | GT     | TGTAT  |         |       |       |      |     |     |     |
|                                                                         | (3711) | TTCTTAT    | GTTAG  | -GAG   | AA        | TTGAT    | G       | GAG    | --G     | TACC     | GGC   | CG---CAG         | ATCA    | AGCTT      | C           | TGA     | --G     | GAGC   | AGATGA | ATTGTGT | CC    |       |      |     |     |     |
|                                                                         |        | Section 75 |        |        |           |          |         |        |         |          |       |                  |         |            |             |         |         |        |        |         |       |       |      |     |     |     |
| SARS-CoV-2 Reference Genome NC_045512.2<br>Fig badnavirus 1 NC_017830.1 | (6143) | 6143       | 6150   | 6160   | 6170      | 6180     | 6190    | 6200   | 6210    | 6225     |       |                  |         |            |             |         |         |        |        |         |       |       |      |     |     |     |
|                                                                         | (6060) | GTGATA     | ATCA   | AATT   | TGCT      | GATGAT   | TTAAAC  | CA     | GTTAA   | CTGG     | TTAT  | AAG              | AAACCT  | GCTTC      | AAG         | AGA     | GCTT    | AAAG   | TTAC   | ATTT    |       |       |      |     |     |     |
|                                                                         | (3786) | ATAA       | CTGG   | ATAC   | ATAA      | TGGG     | GATATC  | TTTGTA | CA      | AAGAG    | CTGT  | TCAT             | TGCA    | -----GCTTC | TGC         | AGA     | AGGG    | AAAG   | CATA   | AAAA    |       |       |      |     |     |     |
|                                                                         |        | Section 76 |        |        |           |          |         |        |         |          |       |                  |         |            |             |         |         |        |        |         |       |       |      |     |     |     |
| SARS-CoV-2 Reference Genome NC_045512.2<br>Fig badnavirus 1 NC_017830.1 | (6226) | 6226       | 6240   | 6250   | 6260      | 6270     | 6280    | 6290   | 6308    |          |       |                  |         |            |             |         |         |        |        |         |       |       |      |     |     |     |
|                                                                         | (6143) | TTC        | CCTGAC | TTAAAT | G         | TG       | TG      | TG     | TG      | CTAT     | TGA   | ---TTAT          | AAACAC  | TACAC      | ACC         | ---CTCT | TTTAA   | GAAG   | AG     | GCTAAAT |       |       |      |     |     |     |
|                                                                         | (3864) | GGG        | CAAGAA | T-AC   | ATT       | GT       | CC      | TTTG   | -TG     | TCT      | CTTA  | ACAGC            | TTGC    | AA         | TC          | TG      | CGG     | ACC    | TTA    | CTAC    | TTGA  | AGAT  | AGA  | AG  | TAC | CGG |
|                                                                         |        | Section 77 |        |        |           |          |         |        |         |          |       |                  |         |            |             |         |         |        |        |         |       |       |      |     |     |     |
| SARS-CoV-2 Reference Genome NC_045512.2<br>Fig badnavirus 1 NC_017830.1 | (6309) | 6309       | 6320   | 6330   | 6340      | 6350     | 6360    | 6370   | 6380    | 6391     |       |                  |         |            |             |         |         |        |        |         |       |       |      |     |     |     |
|                                                                         | (6219) | TGTTAC     | ATAAA  | ACC    | TAT       | TGTTT    | TGGC    | AT     | GTTAA   | CAAT     | GC    | AA               | TGCA    | CTAAT      | AAAG        | CCA     | CGTATA  | AAC    | CAAT   | ACC     | -TGGT | TGTAT | AC   | GT  | TG  |     |
|                                                                         | (3945) | TGGA       | AC     | CAGC   | ACC       | -AT      | CA      | ACCC   | CGAT    | AAATC    | CGA   | GAAG             | AAT     | TAT        | TCAG        | GAG     | CAGCAC  | AAC    | TACAT  | CGGA    | TGGT  | TGTG  | -AAG | TAG |     |     |

SARS-CoV-2 & Fig badnavirus 1.apr

|                                                                         |        |                                  |                      |                             |                      |                    |               |                   |            |                      |                      |
|-------------------------------------------------------------------------|--------|----------------------------------|----------------------|-----------------------------|----------------------|--------------------|---------------|-------------------|------------|----------------------|----------------------|
|                                                                         |        |                                  |                      |                             |                      |                    |               |                   |            | Section 78           |                      |
| SARS-CoV-2 Reference Genome NC_045512.2<br>Fig badnavirus 1 NC_017830.1 | (6392) | 6392                             | 6400                 | 6410                        | 6420                 | 6430               | 6440          | 6450              | 6460       | 6474                 |                      |
|                                                                         | (6301) | TCTTTGGAGCACAAAACAGT---          | TGAAACATCAAAATTC     | TTTTGATGTACTGAAGTCAGAGGACGC | GACAGGGAATGGAT       | TAA                | TC            |                   |            |                      |                      |
|                                                                         | (4026) | AAAATAGAGAGACTAAACAGGAAG         | TGAAACA              | CTACA                       | AAGG---              | GCTATACGAAGCCTT    | ACTAATGGA--   | GAAATCCTTAA       | GG         |                      |                      |
|                                                                         |        |                                  |                      |                             |                      |                    |               |                   |            | Section 79           |                      |
| SARS-CoV-2 Reference Genome NC_045512.2<br>Fig badnavirus 1 NC_017830.1 | (6475) | 6475                             | 6480                 | 6490                        | 6500                 | 6510               | 6520          | 6530              | 6540       | 6557                 |                      |
|                                                                         | (6381) | TT-GCCTGCGAAGATCTAAAA            | CCAGTCTCTGAAGAAGTAGT | GGAATCCTAC                  | CATACAGAAAGACGTTCTT  | GAGTGTA            | ATGT          |                   |            |                      |                      |
|                                                                         | (4103) | AAA                              | GACTACGAGGAGCTGAAA   | GAG                         | ----                 | GAGATAAGGAGCGAAGAA | AGGG--        | CATAATGATACAAGAAC | CAGA----   | AGAA                 |                      |
|                                                                         |        |                                  |                      |                             |                      |                    |               |                   |            | Section 80           |                      |
| SARS-CoV-2 Reference Genome NC_045512.2<br>Fig badnavirus 1 NC_017830.1 | (6558) | 6558                             | 6570                 | 6580                        | 6590                 | 6600               | 6610          | 6620              | 6630       | 6640                 |                      |
|                                                                         | (6463) | GAAAACTACCGAAGTTGTAGGAGACATTAT   | ACTTAAAC             | CAGCAA-AT                   | AATAGTTTAA-AAATTACAG | AAGAGGT            | TGGC          | CACAC             |            |                      |                      |
|                                                                         | (4175) | GTTAACTATCTGGGA                  | -GAAGATGAGA          | AGATTCTTGC                  | AGCAGGAA             | CAGAGGAAAAGAA      | AAATT         | CGTCAAGA          | ATA        | TG-CTTTAT            |                      |
|                                                                         |        |                                  |                      |                             |                      |                    |               |                   |            | Section 81           |                      |
| SARS-CoV-2 Reference Genome NC_045512.2<br>Fig badnavirus 1 NC_017830.1 | (6641) | 6641                             | 6650                 | 6660                        | 6670                 | 6680               | 6690          | 6700              | 6710       | 6723                 |                      |
|                                                                         | (6544) | AGATCTAATGGCTGCTTATGTAGACAATTCTA | GTCTTACTATTAGA       | AACCTAATG                   | AATTATCTAGAGTATT     | AGTTTGAAA          |               |                   |            |                      |                      |
|                                                                         | (4256) | AAC                              | TTGATAT-TGAATTG      | -AGA                        | TTCCAGATGTCTCA       | AGATT              | CAGAGTAAGAGC- | AATTCTTGATAC-     | AGGAGCTTCA | ACAT                 |                      |
|                                                                         |        |                                  |                      |                             |                      |                    |               |                   |            | Section 82           |                      |
| SARS-CoV-2 Reference Genome NC_045512.2<br>Fig badnavirus 1 NC_017830.1 | (6724) | 6724                             | 6730                 | 6740                        | 6750                 | 6760               | 6770          | 6780              | 6790       | 6806                 |                      |
|                                                                         | (6627) | CCTTGCTACTCATGGTTTAGCTGCTGTTAA   | TAGTGTCCCTTGG        | GATACTATAGCTAATTAT          | GCTAAGCCTTT          | CTTAA              | CAA           |                   |            |                      |                      |
|                                                                         | (4335) | GCTGTATCAATGAAGGAGCAGTTC         | ----                 | AAAAGAAAGCCCTC--            | GAGAAAGCCCTTATGAAGT  | CAGCTGAAT          | TGGGGT        | CAAC              |            |                      |                      |
|                                                                         |        |                                  |                      |                             |                      |                    |               |                   |            | Section 83           |                      |
| SARS-CoV-2 Reference Genome NC_045512.2<br>Fig badnavirus 1 NC_017830.1 | (6807) | 6807                             | 6820                 | 6830                        | 6840                 | 6850               | 6860          | 6870              | 6889       |                      |                      |
|                                                                         | (6710) | GT                               | TGT                  | TAGTACAAC                   | TACTAA               | CATAGTTACA         | CGGTGTTTAA    | CCGTGTTTGTAC      | TAATTATATG | CCTTATTTCTTT         | ACTTTATT             |
|                                                                         | (4412) | TC                               | TGT                  | GCAGAA                      | AAACAAAGAA           | GA-AGCTCAAGTAC     | GGGAGAA       | TGATCGGGA         | TGAATACGTT | CAGAATCCCTTT         | ----TAC-             |
|                                                                         |        |                                  |                      |                             |                      |                    |               |                   |            | Section 84           |                      |
| SARS-CoV-2 Reference Genome NC_045512.2<br>Fig badnavirus 1 NC_017830.1 | (6890) | 6890                             | 6900                 | 6910                        | 6920                 | 6930               | 6940          | 6950              | 6960       | 6972                 |                      |
|                                                                         | (6793) | GC                               | TACA                 | ATTGTGTACT                  | TAGAGTACAAAT         | TC                 | TAGA--        | ATTAAAGCAT        | CTATG      | CCGACTACTATAGCAAAGAA | TACTGT               |
|                                                                         | (4489) | -A                               | TACA                 | GTC                         | TGCCACTGGTCA         | TCGGAG             | -ATAACAT      | CCAGATG           | ATTGTAGGT  | TGTA-----            | ACTTCATCAGAGCAATGTAT |

SARS-CoV-2 & Fig badnavirus 1.apr

|                                         |        |                                                                                                                                                                       |      |      |      |      |      |      |      |      |      |
|-----------------------------------------|--------|-----------------------------------------------------------------------------------------------------------------------------------------------------------------------|------|------|------|------|------|------|------|------|------|
|                                         |        | Section 85                                                                                                                                                            |      |      |      |      |      |      |      |      |      |
|                                         |        | (6973)                                                                                                                                                                | 6973 | 6980 | 6990 | 7000 | 7010 | 7020 | 7030 | 7040 | 7055 |
| SARS-CoV-2 Reference Genome NC_045512.2 | (6874) | T A A G A G T G T C G G T A A A T T T T G T C T A G A G G C T T C A T T T A A T T A T T T G A A G T C A C C T A A T T T T T C T A A C T G A T A A A T A T A T A A     |      |      |      |      |      |      |      |      |      |
| Fig badnavirus 1 NC_017830.1            | (4562) | G G A G - G A G T G A G A A T A G A A G G A A T G A G G T A A C C T T T A C A A G A - - A C C T C A C A C G G A T T A G C A C A T C C C C A G A A G - - T C T C G     |      |      |      |      |      |      |      |      |      |
|                                         |        | Section 86                                                                                                                                                            |      |      |      |      |      |      |      |      |      |
|                                         |        | (7056)                                                                                                                                                                | 7056 | 7070 | 7080 | 7090 | 7100 | 7110 | 7120 | 7138 |      |
| SARS-CoV-2 Reference Genome NC_045512.2 | (6957) | T T T G G T T T T T A C T A T T A A G T - G T T T G C T A G G T T C T T T A A T C T A C T C A A C C G C T G C T T T A G G T G T T T T - - A A T G T C T A A T T T A   |      |      |      |      |      |      |      |      |      |
| Fig badnavirus 1 NC_017830.1            | (4640) | G T G A A T T C C C T G G A T G A A G A A G T T T G C G A A G A A - - - - G A A T A T T T G C A G G T G C A G G A G A T G G T G A T C T G C A A C A T T G G A G A A A |      |      |      |      |      |      |      |      |      |
|                                         |        | Section 87                                                                                                                                                            |      |      |      |      |      |      |      |      |      |
|                                         |        | (7139)                                                                                                                                                                | 7139 | 7150 | 7160 | 7170 | 7180 | 7190 | 7200 | 7210 | 7221 |
| SARS-CoV-2 Reference Genome NC_045512.2 | (7037) | G G C A T G C C T T C T T A C T G T A C T G G T T A C A G A G A A G G C T A T T T G A A C T C T A C T A A T - - - - G T C A C T A T T G C A A C C T A C T G T A C T G |      |      |      |      |      |      |      |      |      |
| Fig badnavirus 1 NC_017830.1            | (4719) | G C C G A A A A T C A T T T C T T A A G A A G T T C A G G C C T T T G C T G G A A G A A C T T A A G G A A G C A G G T T T A T A G G A G A A A A T C A T T A C A G     |      |      |      |      |      |      |      |      |      |
|                                         |        | Section 88                                                                                                                                                            |      |      |      |      |      |      |      |      |      |
|                                         |        | (7222)                                                                                                                                                                | 7222 | 7230 | 7240 | 7250 | 7260 | 7270 | 7280 | 7290 | 7304 |
| SARS-CoV-2 Reference Genome NC_045512.2 | (7116) | G T T C T A T A C C T T G T A G T G T T T G T C T T A G T G G T T A G A T T C T T T A G A C A C C T A T C T T C T T T A G A A A C T A T A C A A T T A C C A T T       |      |      |      |      |      |      |      |      |      |
| Fig badnavirus 1 NC_017830.1            | (4802) | C A T T G G A A G A A A A A T G G A T T T T A T G C C A A C T T G A T A T C A A A A A T C T G A T T T C A T A A T T - - G A A G A T A G G C C A C T G A G A A T       |      |      |      |      |      |      |      |      |      |
|                                         |        | Section 89                                                                                                                                                            |      |      |      |      |      |      |      |      |      |
|                                         |        | (7305)                                                                                                                                                                | 7305 | 7310 | 7320 | 7330 | 7340 | 7350 | 7360 | 7370 | 7387 |
| SARS-CoV-2 Reference Genome NC_045512.2 | (7199) | T C A T C T T T T A A A T G G A T T T A A C T G C T T T T G C T T A G T T G C A G A G T G G T T T T T G C A T A T A T T C T T T T C A C T A G G T T T T T C T A       |      |      |      |      |      |      |      |      |      |
| Fig badnavirus 1 NC_017830.1            | (4883) | T T A A C G C C A C A G A T G A A G - - G A G T C C T T C A A G A A G C A T A T C A A G G T - - - - T T T G C T G G A T T A G G A G T C A T C A G G C - - - - A       |      |      |      |      |      |      |      |      |      |
|                                         |        | Section 90                                                                                                                                                            |      |      |      |      |      |      |      |      |      |
|                                         |        | (7388)                                                                                                                                                                | 7388 | 7400 | 7410 | 7420 | 7430 | 7440 | 7450 | 7460 | 7470 |
| SARS-CoV-2 Reference Genome NC_045512.2 | (7282) | T G T A C T T G G A T T G G T G C A A T C A T G C A A T G T T T T C A G C T A T T T T G C A G T A C A T T T T A T A G T A A T T C T T G C T T A T G T G T             |      |      |      |      |      |      |      |      |      |
| Fig badnavirus 1 NC_017830.1            | (4955) | A G T A A A A G C C G C C A C A G - A A C G A C G G C A A T G C T A G T C A A C T C A - - G A A C A A C G G T G G A T C C G - A A A A C A G G G - - - A A G G A G A   |      |      |      |      |      |      |      |      |      |
|                                         |        | Section 91                                                                                                                                                            |      |      |      |      |      |      |      |      |      |
|                                         |        | (7471)                                                                                                                                                                | 7471 | 7480 | 7490 | 7500 | 7510 | 7520 | 7530 | 7540 | 7553 |
| SARS-CoV-2 Reference Genome NC_045512.2 | (7365) | T A A T A A T T A A T C T T G T A C A A A T G G C C C G A T T T C A G C T A T G G T T A G A A T G T A C A T C - - T T C T T T G C A T C A T T T A T T A T G T A T     |      |      |      |      |      |      |      |      |      |
| Fig badnavirus 1 NC_017830.1            | (5031) | T C A A A A G G A A G - - - G A A A G A A T G G T C T T C A A C T - A C A A A A G G T T - G A A T G - A C A T C A C T C A T A A G G A T C A G T A T A G T C T T C C A |      |      |      |      |      |      |      |      |      |

SARS-CoV-2 & Fig badnavirus 1.apr

|                                                                         |        |                                                                                            |      |      |      |      |      |      |      |      |  |
|-------------------------------------------------------------------------|--------|--------------------------------------------------------------------------------------------|------|------|------|------|------|------|------|------|--|
|                                                                         |        | Section 92                                                                                 |      |      |      |      |      |      |      |      |  |
| SARS-CoV-2 Reference Genome NC_045512.2<br>Fig badnavirus 1 NC_017830.1 | (7554) | 7554                                                                                       | 7560 | 7570 | 7580 | 7590 | 7600 | 7610 | 7620 | 7636 |  |
|                                                                         | (7446) | GGAAAGTTATCTGCATGTGTAGACGGTTGTAATTCATCAACCTTGATGATGTGTTACAAACGTAATAGAGCAACAAGAGT           |      |      |      |      |      |      |      |      |  |
|                                                                         | (5108) | GGAAATAAATACG---ATCCTCAAGAGAGGTTGAAAT-AGCAA---G---ATATTTCAGCAAGTTTGATCTA---A---AGAG-C      |      |      |      |      |      |      |      |      |  |
|                                                                         |        | Section 93                                                                                 |      |      |      |      |      |      |      |      |  |
| SARS-CoV-2 Reference Genome NC_045512.2<br>Fig badnavirus 1 NC_017830.1 | (7637) | 7637                                                                                       | 7650 | 7660 | 7670 | 7680 | 7690 | 7700 | 7719 |      |  |
|                                                                         | (7529) | GAAATGTACAACTATTTGTTAATGGTGTTAGAAAGGTCTTTTATGTCTATGCTAATGGAGGTAAAGGCTTTTGC AAACTACACAA     |      |      |      |      |      |      |      |      |  |
|                                                                         | (5174) | GGAT-TTCAACAAGTTGCTATG-----CATCCTGACTCAATAG-AATGGAC----AGCTTTTGGGTC CAGACGG                |      |      |      |      |      |      |      |      |  |
|                                                                         |        | Section 94                                                                                 |      |      |      |      |      |      |      |      |  |
| SARS-CoV-2 Reference Genome NC_045512.2<br>Fig badnavirus 1 NC_017830.1 | (7720) | 7720                                                                                       | 7730 | 7740 | 7750 | 7760 | 7770 | 7780 | 7790 | 7802 |  |
|                                                                         | (7612) | TTGGAATTGTGTAAATTGTGATACATTTCTGTGCTGGTAGTACATTTATTAGTGA TGAAGTTGCGAGAGACTTGTCACTACAGT      |      |      |      |      |      |      |      |      |  |
|                                                                         | (5239) | ATTGTAT-GAGTGGCTTGTTCATGGCATTCGGACTCAAAA-ACGCTCC TTC----TGTTTTTCAAAGAAAGATGATGATGCT        |      |      |      |      |      |      |      |      |  |
|                                                                         |        | Section 95                                                                                 |      |      |      |      |      |      |      |      |  |
| SARS-CoV-2 Reference Genome NC_045512.2<br>Fig badnavirus 1 NC_017830.1 | (7803) | 7803                                                                                       | 7810 | 7820 | 7830 | 7840 | 7850 | 7860 | 7870 | 7885 |  |
|                                                                         | (7695) | TTAAAAGACCAATAAATCCTACTGAC CAGTCTTCTTACATCGTTGATAGTTTACAGTGAAGAATGTTCCATCCATCTTTAC         |      |      |      |      |      |      |      |      |  |
|                                                                         | (5316) | TCAAAAGGACAGAAAGATTTTATGTG--CAGTC----TACATTGACGATATTCTT-----GTTTTC TC-----TGAA             |      |      |      |      |      |      |      |      |  |
|                                                                         |        | Section 96                                                                                 |      |      |      |      |      |      |      |      |  |
| SARS-CoV-2 Reference Genome NC_045512.2<br>Fig badnavirus 1 NC_017830.1 | (7886) | 7886                                                                                       | 7900 | 7910 | 7920 | 7930 | 7940 | 7950 | 7968 |      |  |
|                                                                         | (7778) | TTTGA TAAAGCTGGTCAA AAGACTTATGAAAGACATTC TCTCTCTCATTTTGTTAAC TTAGACAAC-CTGAGAGCTAAATAACA   |      |      |      |      |      |      |      |      |  |
|                                                                         | (5375) | AACGAGAAAGATCATGCGAAGCACT-TGAAAGGCATGT TGGAGATCTGC AAAAGAAATGGGTTAGTTCTAGCCCATCTAAAA       |      |      |      |      |      |      |      |      |  |
|                                                                         |        | Section 97                                                                                 |      |      |      |      |      |      |      |      |  |
| SARS-CoV-2 Reference Genome NC_045512.2<br>Fig badnavirus 1 NC_017830.1 | (7969) | 7969                                                                                       | 7980 | 7990 | 8000 | 8010 | 8020 | 8030 | 8040 | 8051 |  |
|                                                                         | (7860) | CTAAAGGTTTCATTGCCATTAATAATGTTATAGTTT TGA TGGTAAATCAAAATGTGAAGATCATCTGCAAAA TCAGCGTCTGTT    |      |      |      |      |      |      |      |      |  |
|                                                                         | (5457) | -TG AAGATAGCAGTCCAAAGAGGTGGAAT-TCTTGGA GCCC AAATCGGAAATCA AAGGATC-----CGACTTCAGCCACATGT    |      |      |      |      |      |      |      |      |  |
|                                                                         |        | Section 98                                                                                 |      |      |      |      |      |      |      |      |  |
| SARS-CoV-2 Reference Genome NC_045512.2<br>Fig badnavirus 1 NC_017830.1 | (8052) | 8052                                                                                       | 8060 | 8070 | 8080 | 8090 | 8100 | 8110 | 8120 | 8134 |  |
|                                                                         | (7943) | TAC TACAGTCAGCTTATGTTGTCAA CCTATACTGTTACTAGATCAGGCATTAGTGTC TGA TGTGGTGATAGTGC GGAA GTTG C |      |      |      |      |      |      |      |      |  |
|                                                                         | (5533) | TA-TAAAG AAGATCGTTGAGTTCAATGAGGCTG--AGTTGAAGGAGAAAAGGCA TGA----GATCATGTTAGGAATTCTC         |      |      |      |      |      |      |      |      |  |

SARS-CoV-2 & Fig badnavirus 1.apr

|                                                                         |        |                                                                         |      |      |       |        |      |      |      |     |       |     |         |     |      |      |        |     |        |       |      |     |     |     |     |     |     |    |     |     |     |     |    |    |      |     |     |     |     |    |     |    |    |    |    |   |   |     |   |    |   |   |
|-------------------------------------------------------------------------|--------|-------------------------------------------------------------------------|------|------|-------|--------|------|------|------|-----|-------|-----|---------|-----|------|------|--------|-----|--------|-------|------|-----|-----|-----|-----|-----|-----|----|-----|-----|-----|-----|----|----|------|-----|-----|-----|-----|----|-----|----|----|----|----|---|---|-----|---|----|---|---|
|                                                                         |        | Section 99                                                              |      |      |       |        |      |      |      |     |       |     |         |     |      |      |        |     |        |       |      |     |     |     |     |     |     |    |     |     |     |     |    |    |      |     |     |     |     |    |     |    |    |    |    |   |   |     |   |    |   |   |
| SARS-CoV-2 Reference Genome NC_045512.2<br>Fig badnavirus 1 NC_017830.1 | (8135) | 8135                                                                    | 8140 | 8150 | 8160  | 8170   | 8180 | 8190 | 8200 |     |       |     |         |     |      | 8217 |        |     |        |       |      |     |     |     |     |     |     |    |     |     |     |     |    |    |      |     |     |     |     |    |     |    |    |    |    |   |   |     |   |    |   |   |
|                                                                         | (8026) | AGTTAAATGTTTGTGCTTACGTTAAACGTTTTCATCAACCTTTTAA-CGTAC-CAATGGAAAACTCAAACA | CTA  | GT   | TC    |        |      |      |      |     |       |     |         |     |      |      |        |     |        |       |      |     |     |     |     |     |     |    |     |     |     |     |    |    |      |     |     |     |     |    |     |    |    |    |    |   |   |     |   |    |   |   |
|                                                                         | (5609) | AAC                                                                     | T--- | ATG  | CTCG- | GCATAC | ATT  | CC   | TA   | CTT | GGGC- | CGC | CTTTTAA | G   | CCC  | AC   | T      | ATG | CC     | AAAAC | ---- | AA  | GT  | CA  | AC  | TG  |     |    |     |     |     |     |    |    |      |     |     |     |     |    |     |    |    |    |    |   |   |     |   |    |   |   |
|                                                                         |        | Section 100                                                             |      |      |       |        |      |      |      |     |       |     |         |     |      |      |        |     |        |       |      |     |     |     |     |     |     |    |     |     |     |     |    |    |      |     |     |     |     |    |     |    |    |    |    |   |   |     |   |    |   |   |
| SARS-CoV-2 Reference Genome NC_045512.2<br>Fig badnavirus 1 NC_017830.1 | (8218) | 8218                                                                    | 8230 | 8240 | 8250  | 8260   | 8270 | 8280 |      |     |       |     |         |     | 8290 | 8300 |        |     |        |       |      |     |     |     |     |     |     |    |     |     |     |     |    |    |      |     |     |     |     |    |     |    |    |    |    |   |   |     |   |    |   |   |
|                                                                         | (8107) | AAC                                                                     | TGC  | AGA  | AG    | CT     | TGC  | AA   | AGA  | AT  | GT    | GT  | CCT     | T   | AG   | AC   | AA     | TG  | CT     | TAT   | CT   | ACT | TT  | AT  | TT  | TC  | AG  | C  | AG  | CT  | GG  | CA  | AG | GT | TT   | GC  |     |     |     |    |     |    |    |    |    |   |   |     |   |    |   |   |
|                                                                         | (5683) | AGA                                                                     | TA-  | AGA  | G     | GA     | TGAA | --   | TGC  | CC  | AG    | GAT | -----   | TGG | --   | AA   | GC     | TC  | G      | TGG   | CC   | AAA | T   | AA  | AGA | AGA | AG  | TC | C   | AG  | AA  | --  | GC | -  | TGC  |     |     |     |     |    |     |    |    |    |    |   |   |     |   |    |   |   |
|                                                                         |        | Section 101                                                             |      |      |       |        |      |      |      |     |       |     |         |     |      |      |        |     |        |       |      |     |     |     |     |     |     |    |     |     |     |     |    |    |      |     |     |     |     |    |     |    |    |    |    |   |   |     |   |    |   |   |
| SARS-CoV-2 Reference Genome NC_045512.2<br>Fig badnavirus 1 NC_017830.1 | (8301) | 8301                                                                    | 8310 | 8320 | 8330  | 8340   | 8350 | 8360 | 8370 |     |       |     |         |     |      | 8383 |        |     |        |       |      |     |     |     |     |     |     |    |     |     |     |     |    |    |      |     |     |     |     |    |     |    |    |    |    |   |   |     |   |    |   |   |
|                                                                         | (8190) | TT                                                                      | GAT  | TC   | GA    | TG     | AG   | AA   | CT   | AA  | AG    | AT  | TG      | TT  | GT   | T    | GA     | AT  | GT     | CT    | T    | AA  | ATT | G   | TC  | AC  | AT  | CA | AT  | CT  | G   | ACA | TA | GA | AG   | TT  | TAC | TGG | C   | GA | TAG | T  |    |    |    |   |   |     |   |    |   |   |
|                                                                         | (5751) | CA                                                                      | GAT  | CT   | GA    | GC     | TA   | CC   | AC   | CG  | AG    | GA  | --      | TT  | GT   | T    | TC     | AT  | C----- | ATT   | C    | T   | TGA | AA  | CA  | GA  | C   | GG | C   | T   | G   | TA  | T  | AG | CT   | GGT | TGG | G   | GA  | GG | AA  |    |    |    |    |   |   |     |   |    |   |   |
|                                                                         |        | Section 102                                                             |      |      |       |        |      |      |      |     |       |     |         |     |      |      |        |     |        |       |      |     |     |     |     |     |     |    |     |     |     |     |    |    |      |     |     |     |     |    |     |    |    |    |    |   |   |     |   |    |   |   |
| SARS-CoV-2 Reference Genome NC_045512.2<br>Fig badnavirus 1 NC_017830.1 | (8384) | 8384                                                                    | 8390 | 8400 | 8410  | 8420   | 8430 | 8440 | 8450 |     |       |     |         |     |      | 8466 |        |     |        |       |      |     |     |     |     |     |     |    |     |     |     |     |    |    |      |     |     |     |     |    |     |    |    |    |    |   |   |     |   |    |   |   |
|                                                                         | (8273) | T                                                                       | G    | TAA  | TAA   | C      | T    | A    | T    | GC  | T     | C   | C       | T   | A    | T    | AA     | C   | AA     | AG    | T    | T   | GA  | AA  | AC  | AT  | G   | -  | AC  | AC  | CC  | CG  | TG | AC | C    | T   | GG  | TG  | CT  | T  | G   | T  | AT | TG | AC | T | G | TAG | T | GC |   |   |
|                                                                         | (5826) | TT                                                                      | TG-  | TAA  | AT    | TG     | AA   | GC   | CA   | AA  | GA    | AA  | GC      | GA  | CC   | CA   | AG     | AA  | GG     | AT    | G    | AG  | AA  | AG  | TT  | TG  | CG  | C  | CT  | A-  | TG  | CT  | AG | T  | GG   | GA  | AG  | TT  | TAG | T  | CT  | CA |    |    |    |   |   |     |   |    |   |   |
|                                                                         |        | Section 103                                                             |      |      |       |        |      |      |      |     |       |     |         |     |      |      |        |     |        |       |      |     |     |     |     |     |     |    |     |     |     |     |    |    |      |     |     |     |     |    |     |    |    |    |    |   |   |     |   |    |   |   |
| SARS-CoV-2 Reference Genome NC_045512.2<br>Fig badnavirus 1 NC_017830.1 | (8467) | 8467                                                                    | 8480 | 8490 | 8500  | 8510   | 8520 | 8530 |      |     |       |     |         |     | 8549 |      |        |     |        |       |      |     |     |     |     |     |     |    |     |     |     |     |    |    |      |     |     |     |     |    |     |    |    |    |    |   |   |     |   |    |   |   |
|                                                                         | (8355) | ----                                                                    | GT   | CA   | T--   | ATT    | A    | AT   | GC   | G   | C     | A   | GG      | T   | AG   | CA   | AAA    | AG  | T      | CA    | C-   | AA  | CA  | ATT | G   | CT  | T   | G  | AT  | AT  | G   | AA  | CG | TT | AA   | AG  | AT  | TT  | C   | A  | T   | G  | TC | AT | TG | T | C |     |   |    |   |   |
|                                                                         | (5907) | TC                                                                      | AA   | GT   | CA    | ACC    | ATT  | G    | AT   | GC  | C     | GA  | AA      | T   | C-   | CA   | T      | GC  | AG     | T     | CA   | TG  | AA  | CA  | --- | CT  | C   | TG | --- | G   | AAA | AA  | TT | AA | AG   | AT  | TT  | AT  | T   | A  | TC  | T  | G  | A  | T  |   |   |     |   |    |   |   |
|                                                                         |        | Section 104                                                             |      |      |       |        |      |      |      |     |       |     |         |     |      |      |        |     |        |       |      |     |     |     |     |     |     |    |     |     |     |     |    |    |      |     |     |     |     |    |     |    |    |    |    |   |   |     |   |    |   |   |
| SARS-CoV-2 Reference Genome NC_045512.2<br>Fig badnavirus 1 NC_017830.1 | (8550) | 8550                                                                    | 8560 | 8570 | 8580  | 8590   | 8600 | 8610 | 8620 |     |       |     |         |     |      | 8632 |        |     |        |       |      |     |     |     |     |     |     |    |     |     |     |     |    |    |      |     |     |     |     |    |     |    |    |    |    |   |   |     |   |    |   |   |
|                                                                         | (8431) | TG                                                                      | AA   | CA   | A     | C      | T    | AC   | GA   | AA  | CA    | AA  | T       | AC  | GT   | AG   | TGC    | TG  | CT     | AA    | AA   | AG  | AT  | AA  | CT  | TA  | C   | CT | TT  | TA  | AG  | TT  | GA | C  | AT   | GT  | GC  | AA  | CT  | A  | CT  | GA | CA | AG |    |   |   |     |   |    |   |   |
|                                                                         | (5982) | AA                                                                      | AA   | GG   | AG    | TT-    | G    | AT   | CA   | TA  | CA    | GA  | AC      | TG  | AC   | TGC  | C----- | AA  | GC     | AT    | CA   | TC  | AG  | CT  | T   | CT  | T   | CA | A   | T-- | AA  | AT  | CC | GC | ---- | C   | CT  | AA  | T   | AA |     |    |    |    |    |   |   |     |   |    |   |   |
|                                                                         |        | Section 105                                                             |      |      |       |        |      |      |      |     |       |     |         |     |      |      |        |     |        |       |      |     |     |     |     |     |     |    |     |     |     |     |    |    |      |     |     |     |     |    |     |    |    |    |    |   |   |     |   |    |   |   |
| SARS-CoV-2 Reference Genome NC_045512.2<br>Fig badnavirus 1 NC_017830.1 | (8633) | 8633                                                                    | 8640 | 8650 | 8660  | 8670   | 8680 | 8690 | 8700 |     |       |     |         |     |      | 8715 |        |     |        |       |      |     |     |     |     |     |     |    |     |     |     |     |    |    |      |     |     |     |     |    |     |    |    |    |    |   |   |     |   |    |   |   |
|                                                                         | (8514) | TTG                                                                     | T    | T    | A     | TGT    | TG   | T    | A    | A   | C     | A   | A       | A   | G    | A    | TAG    | C   | AC     | T     | T    | A   | AGG | G   | TGG | T   | A-- | AA | ATT | G   | T   | T   | A  | A  | T    | T   | GG  | T   | -   | TG | AG  | C  | AG | T  | T  | A | A | T   | T | AG | T | T |
|                                                                         | (6053) | CCC                                                                     | T    | C    | T     | AG     | AG   | TG   | ---- | AG  | AT    | GG  | TAG     | C   | T    | T    | A      | CGG | AT     | T     | T    | A   | C   | GG  | A   | T   | T   | T  | A   | T   | C   | A   | GG | G  | A    | TAG | A   | A   | T   | T  | A   | A  | T  | T  | AG | T | T | AG  | A | T  |   |   |

SARS-CoV-2 & Fig badnavirus 1.apr

|                                                                         |        |               |                    |                  |              |              |               |             |                 |                    |                         |
|-------------------------------------------------------------------------|--------|---------------|--------------------|------------------|--------------|--------------|---------------|-------------|-----------------|--------------------|-------------------------|
|                                                                         |        | Section 106   |                    |                  |              |              |               |             |                 |                    |                         |
| SARS-CoV-2 Reference Genome NC_045512.2<br>Fig badnavirus 1 NC_017830.1 | (8716) | 8716          | 8730               | 8740             | 8750         | 8760         | 8770          | 8780        | 8798            |                    |                         |
|                                                                         | (8594) | ACACTTGTGTTCC | TTT TTG T TGCTGCTA | TTT TCTAT        | TTAAT        | AACTGCTG     | TTCA          | TGTCATG     | TCTAAACAT       | ACTGACTTTTTC       |                         |
|                                                                         | (6131) | GGAGGGATAATG  | TGCTTGCTAGCC       | TTTCAAGG         | TTAATTA      | ACAGT        | TTC           | TT-----     | TCTTACAGA       | ATGGAGTCTGAAA      |                         |
|                                                                         |        | Section 107   |                    |                  |              |              |               |             |                 |                    |                         |
| SARS-CoV-2 Reference Genome NC_045512.2<br>Fig badnavirus 1 NC_017830.1 | (8799) | 8799          | 8810               | 8820             | 8830         | 8840         | 8850          | 8860        | 8870            | 8881               |                         |
|                                                                         | (8677) | TGAATCATAG    | GATACAAG           | GCTATTGATGGT     | GGTGGTCACT   | CGTGACA      | TAGCATCTA     | CAGAT       | TACTTGTT        | TTGCTAACAAACAT     |                         |
|                                                                         | (6207) | AGGAGGAAGCA   | GTAGCAGA           | GCTAGAGAAGCT     | TATGGAAGAC   | AA-ACAAT     | GCAAGGAAGCAAC | TCCTACCA    | TTAATCAAC       | AAAAT              |                         |
|                                                                         |        | Section 108   |                    |                  |              |              |               |             |                 |                    |                         |
| SARS-CoV-2 Reference Genome NC_045512.2<br>Fig badnavirus 1 NC_017830.1 | (8882) | 8882          | 8890               | 8900             | 8910         | 8920         | 8930          | 8940        | 8950            | 8964               |                         |
|                                                                         | (8759) | GCTGATT       | TGACACATGGT        | TTAGCCAGCGTGGTGG | TGTTAGT      | TATACT       | AATGAC        | AAAGCTTGC   | CCATTGAT        | TGCTGCAGTCATAAC    |                         |
|                                                                         | (6289) | GACGAAC       | TGTTTCAACAAT       | TACCAGAACCTTGCTG | -----        | AGGAAA       | GAGAAAG       | GAT--CCTTC  | GAT--CAGG       | AGGAATATC          |                         |
|                                                                         |        | Section 109   |                    |                  |              |              |               |             |                 |                    |                         |
| SARS-CoV-2 Reference Genome NC_045512.2<br>Fig badnavirus 1 NC_017830.1 | (8965) | 8965          | 8970               | 8980             | 8990         | 9000         | 9010          | 9020        | 9030            | 9047               |                         |
|                                                                         | (8842) | AAGA          | GAAGTG             | GGTTT            | TGTCGT       | TGCCTGGTTTG  | CCTGGC        | ACGATATTAC  | GACAACTAATG     | TGACTTTTTG         | CATTCTCTTA              |
|                                                                         | (6360) | TTTT          | GCCAGAGACAA        | TGAAT            | T            | CAGAAAACAAC  | T             | CAGGAGGT    | T-----          | GAGAA              | GATCTGCAAGAAGAGC        |
|                                                                         |        | Section 110   |                    |                  |              |              |               |             |                 |                    |                         |
| SARS-CoV-2 Reference Genome NC_045512.2<br>Fig badnavirus 1 NC_017830.1 | (9048) | 9048          | 9060               | 9070             | 9080         | 9090         | 9100          | 9110        | 9120            | 9130               |                         |
|                                                                         | (8924) | AGAGTTT       | TAGTGCAGT          | TGGTAACA         | TCTGTTACA    | CACTCAAAAC   | TTATAGAGT     | ACAC        | TGACTTTGCAACATC | AGCTTGTGT          |                         |
|                                                                         | (6438) | GGAACAA       | TACAGGCAGAT        | TTCACACA         | CTTAAAACA    | GCCCAATGTGCA | T             | CATGAGT     | T               | CACCCGGAAGG        | ATGGGAATTATTG           |
|                                                                         |        | Section 111   |                    |                  |              |              |               |             |                 |                    |                         |
| SARS-CoV-2 Reference Genome NC_045512.2<br>Fig badnavirus 1 NC_017830.1 | (9131) | 9131          | 9140               | 9150             | 9160         | 9170         | 9180          | 9190        | 9200            | 9213               |                         |
|                                                                         | (9007) | TT---         | TGGCTGC            | TGAATGT-ACAATT   | TTTAAAGATGCT | TCTGGTAAG    | CCAGTAC       | CATATTGTTAT | GATACCAATG      | -TACTAGA           |                         |
|                                                                         | (6521) | CTGAT         | TGCTTGC            | CAAGC            | GTTAGGCGAT   | T            | TGACGCAAGAT   | T           | TAGAAAGGTCC     | TACAAGACTTGAAGGACG | CGTCAGCTGACAGC          |
|                                                                         |        | Section 112   |                    |                  |              |              |               |             |                 |                    |                         |
| SARS-CoV-2 Reference Genome NC_045512.2<br>Fig badnavirus 1 NC_017830.1 | (9214) | 9214          | 9220               | 9230             | 9240         | 9250         | 9260          | 9270        | 9280            | 9296               |                         |
|                                                                         | (9085) | AGGTTCT       | TGTTGCTT           | TGAAAGTT         | TACCCCTG     | ACACACGT     | TATGTGCT      | T           | CATGGA          | TGGCTCTATAT        | TCAATTTCTTAACACCT       |
|                                                                         | (6604) | CTAAAG        | TCCGCATT           | TGAA             | GCA          | TGATGGG      | CCAGAAAGTGGT  | ---         | TGAGGCGTCT      | C                  | ACTATAATCGATGCCTTATCTTT |



SARS-CoV-2 & Fig badnavirus 1.apr

|                                         |        |             |       |       |       |       |       |       |       |       |       |
|-----------------------------------------|--------|-------------|-------|-------|-------|-------|-------|-------|-------|-------|-------|
|                                         |        | Section 113 |       |       |       |       |       |       |       |       |       |
|                                         |        | (9297)      | 9297  | 9310  | 9320  | 9330  | 9340  | 9350  | 9360  | 9379  |       |
| SARS-CoV-2 Reference Genome NC_045512.2 | (9168) | A           | CCTT  | GAAGG | TC    | TGT   | TAG   | AGT   | TGG   | TAA   | CA    |
| Fig badnavirus 1 NC_017830.1            | (6682) | T           | CCTT  | TGTCA | TT    | TGT   | ATA   | TGG   | AA    | TC    | GT    |
|                                         |        | (9380)      | 9380  | 9390  | 9400  | 9410  | 9420  | 9430  | 9440  | 9450  | 9462  |
| SARS-CoV-2 Reference Genome NC_045512.2 | (9250) | T           | TTTT  | GT    | AT    | CT    | TAC   | TAG   | TGG   | ---   | GT    |
| Fig badnavirus 1 NC_017830.1            | (6755) | A           | TTTT  | GC    | GT    | TT    | TAT   | CCG   | CT    | TA    | CA    |
|                                         |        | (9463)      | 9463  | 9470  | 9480  | 9490  | 9500  | 9510  | 9520  | 9530  | 9545  |
| SARS-CoV-2 Reference Genome NC_045512.2 | (9330) | A           | TGC   | TG    | TAA   | ATT   | -     | TAC   | TT    | ACT   | TA    |
| Fig badnavirus 1 NC_017830.1            | (6832) | C           | CT    | TT    | TGC   | CCC   | CT    | TG    | TT    | TT    | TA    |
|                                         |        | (9546)      | 9546  | 9560  | 9570  | 9580  | 9590  | 9600  | 9610  | 9628  |       |
| SARS-CoV-2 Reference Genome NC_045512.2 | (9412) | T           | GG    | TGG   | AT    | TG    | TAG   | CT    | AT    | CG    | TAG   |
| Fig badnavirus 1 NC_017830.1            | (6914) | -           | GG    | CCCC  | AA    | TGA   | AGC   | ACC   | CG    | ----  | AG    |
|                                         |        | (9629)      | 9629  | 9640  | 9650  | 9660  | 9670  | 9680  | 9690  | 9700  | 9711  |
| SARS-CoV-2 Reference Genome NC_045512.2 | (9495) | T           | AG    | TTG   | CC    | TT    | AA    | TAC   | TT    | ACT   | AT    |
| Fig badnavirus 1 NC_017830.1            | (6990) | A           | AG    | CAA   | CC    | TT    | GA    | GC    | CTT   | -     | ACT   |
|                                         |        | (9712)      | 9712  | 9720  | 9730  | 9740  | 9750  | 9760  | 9770  | 9780  | 9794  |
| SARS-CoV-2 Reference Genome NC_045512.2 | (9578) | T           | ATT   | CT    | GT    | TATT  | TAC   | TT    | GTA   | CT    | TGA   |
| Fig badnavirus 1 NC_017830.1            | (7070) | T           | TAG   | AG    | GT    | ATT   | CA    | GT    | TT    | TAA   | AA    |
|                                         |        | (9795)      | 9795  | 9800  | 9810  | 9820  | 9830  | 9840  | 9850  | 9860  | 9877  |
| SARS-CoV-2 Reference Genome NC_045512.2 | (9660) | T           | CAC   | ACC   | TTT   | TAG   | TAC   | TTT   | CT    | TGG   | ATA   |
| Fig badnavirus 1 NC_017830.1            | (7141) | -           | ----- | ----- | ----- | ----- | ----- | ----- | ----- | ----- | ----- |

SARS-CoV-2 & Fig badnavirus 1.apr

|                                         |         |                                                                                      |       |       |       |       |       |       |       |       |  |
|-----------------------------------------|---------|--------------------------------------------------------------------------------------|-------|-------|-------|-------|-------|-------|-------|-------|--|
|                                         |         | Section 120                                                                          |       |       |       |       |       |       |       |       |  |
| SARS-CoV-2 Reference Genome NC_045512.2 | (9878)  | 9878                                                                                 | 9890  | 9900  | 9910  | 9920  | 9930  | 9940  | 9950  | 9960  |  |
|                                         | (9743)  | TACCTAAAGAGACGTGTAGTCTTTAATGGTGTTCCTTTAGTACTTTTGAAGAAGCTGCGCTGTGCACCTTTTGTAAATAA     |       |       |       |       |       |       |       |       |  |
| Fig badnavirus 1 NC_017830.1            | (7141)  | -----                                                                                |       |       |       |       |       |       |       |       |  |
|                                         |         | Section 121                                                                          |       |       |       |       |       |       |       |       |  |
| SARS-CoV-2 Reference Genome NC_045512.2 | (9961)  | 9961                                                                                 | 9970  | 9980  | 9990  | 10000 | 10010 | 10020 | 10030 | 10043 |  |
|                                         | (9826)  | AGAAATGTATCTAAAGTTGCGTAGTGATGTGCTATTACCTCTTACGCAATATAATAGATACTTAGCTCTTTATAATAAGTACA  |       |       |       |       |       |       |       |       |  |
| Fig badnavirus 1 NC_017830.1            | (7141)  | -----                                                                                |       |       |       |       |       |       |       |       |  |
|                                         |         | Section 122                                                                          |       |       |       |       |       |       |       |       |  |
| SARS-CoV-2 Reference Genome NC_045512.2 | (10044) | 10044                                                                                | 10050 | 10060 | 10070 | 10080 | 10090 | 10100 | 10110 | 10126 |  |
|                                         | (9909)  | AGTATTTTGTAGTGAGCAATGGATACAACCTAGCTACAGAGAAGCTGCTTGTGTCATCTCGCAAAGGCTCTCAATGACTTCAGT |       |       |       |       |       |       |       |       |  |
| Fig badnavirus 1 NC_017830.1            | (7141)  | -----                                                                                |       |       |       |       |       |       |       |       |  |
|                                         |         | Section 123                                                                          |       |       |       |       |       |       |       |       |  |
| SARS-CoV-2 Reference Genome NC_045512.2 | (10127) | 10127                                                                                | 10140 | 10150 | 10160 | 10170 | 10180 | 10190 | 10209 |       |  |
|                                         | (9992)  | AACTCAGGTTCTGATGTTCTTTACCAACCACCACAAACCTCTATCACCTCAGCTGTTTTGCAGAGTGGTTTTAGAAAAATGGC  |       |       |       |       |       |       |       |       |  |
| Fig badnavirus 1 NC_017830.1            | (7141)  | -----                                                                                |       |       |       |       |       |       |       |       |  |
|                                         |         | Section 124                                                                          |       |       |       |       |       |       |       |       |  |
| SARS-CoV-2 Reference Genome NC_045512.2 | (10210) | 10210                                                                                | 10220 | 10230 | 10240 | 10250 | 10260 | 10270 | 10280 | 10292 |  |
|                                         | (10075) | ATTCCCATCTGGTAAAGTTGAGGGTTGTATGGTACAAGTAACTTGTGGTACAACCTAACCGTCTTTGGCTTGATGACG       |       |       |       |       |       |       |       |       |  |
| Fig badnavirus 1 NC_017830.1            | (7141)  | -----                                                                                |       |       |       |       |       |       |       |       |  |
|                                         |         | Section 125                                                                          |       |       |       |       |       |       |       |       |  |
| SARS-CoV-2 Reference Genome NC_045512.2 | (10293) | 10293                                                                                | 10300 | 10310 | 10320 | 10330 | 10340 | 10350 | 10360 | 10375 |  |
|                                         | (10158) | TAGTTTACTGTCCAAGACATGTGATCTGCACCTCTGAAGACATGCTTAACCCTAATTATGAAGATTTACTCATTTCGTAAGTCT |       |       |       |       |       |       |       |       |  |
| Fig badnavirus 1 NC_017830.1            | (7141)  | -----                                                                                |       |       |       |       |       |       |       |       |  |
|                                         |         | Section 126                                                                          |       |       |       |       |       |       |       |       |  |
| SARS-CoV-2 Reference Genome NC_045512.2 | (10376) | 10376                                                                                | 10390 | 10400 | 10410 | 10420 | 10430 | 10440 | 10458 |       |  |
|                                         | (10241) | AATCATAATTTCTTGGTACAGGCTGGTAATGTTCAACTCAGGGTTATTGGACATTCTATGCAAAATTGTGTACTTAAGCTTAA  |       |       |       |       |       |       |       |       |  |
| Fig badnavirus 1 NC_017830.1            | (7141)  | -----                                                                                |       |       |       |       |       |       |       |       |  |

SARS-CoV-2 & Fig badnavirus 1.apr

|                                         |         |                                                                                       |       |       |       |       |       |       |       |       |  |  |
|-----------------------------------------|---------|---------------------------------------------------------------------------------------|-------|-------|-------|-------|-------|-------|-------|-------|--|--|
|                                         |         | Section 127                                                                           |       |       |       |       |       |       |       |       |  |  |
| SARS-CoV-2 Reference Genome NC_045512.2 | (10459) | 10459                                                                                 | 10470 | 10480 | 10490 | 10500 | 10510 | 10520 | 10530 | 10541 |  |  |
|                                         | (10324) | GGTTGATACAGCCAATCCTAAGACACCTAAGTATAAGTTTGTTCGCATTCAACCAGGACAGACTTTTTTCAGTGTTAGCTTGTT  |       |       |       |       |       |       |       |       |  |  |
| Fig badnavirus 1 NC_017830.1            |         | (7141)                                                                                | ----- |       |       |       |       |       |       |       |  |  |
|                                         |         | Section 128                                                                           |       |       |       |       |       |       |       |       |  |  |
| SARS-CoV-2 Reference Genome NC_045512.2 | (10542) | 10542                                                                                 | 10550 | 10560 | 10570 | 10580 | 10590 | 10600 | 10610 | 10624 |  |  |
|                                         | (10407) | ACAATGGTTCACCATCTGGTGTTTACCAATGTGCTATGAGGCCCAATTTCACTATTAAGGGTTCATTCCTTAATGGTTCATGT   |       |       |       |       |       |       |       |       |  |  |
| Fig badnavirus 1 NC_017830.1            |         | (7141)                                                                                | ----- |       |       |       |       |       |       |       |  |  |
|                                         |         | Section 129                                                                           |       |       |       |       |       |       |       |       |  |  |
| SARS-CoV-2 Reference Genome NC_045512.2 | (10625) | 10625                                                                                 | 10630 | 10640 | 10650 | 10660 | 10670 | 10680 | 10690 | 10707 |  |  |
|                                         | (10490) | GGTAGTGTTGGTTTTAACATAGATTATGACTGTGTCTCTTTTTGTACATGCACCATATGGAATTACCAACTGGAGTTCATGC    |       |       |       |       |       |       |       |       |  |  |
| Fig badnavirus 1 NC_017830.1            |         | (7141)                                                                                | ----- |       |       |       |       |       |       |       |  |  |
|                                         |         | Section 130                                                                           |       |       |       |       |       |       |       |       |  |  |
| SARS-CoV-2 Reference Genome NC_045512.2 | (10708) | 10708                                                                                 | 10720 | 10730 | 10740 | 10750 | 10760 | 10770 | 10780 | 10790 |  |  |
|                                         | (10573) | TGGCACAGACTTAGAAGGTAACCTTTTATGGACCTTTTGTGACAGGCAAACAGCACAAAGCAGCTGGTACGGACACAACCTATTA |       |       |       |       |       |       |       |       |  |  |
| Fig badnavirus 1 NC_017830.1            |         | (7141)                                                                                | ----- |       |       |       |       |       |       |       |  |  |
|                                         |         | Section 131                                                                           |       |       |       |       |       |       |       |       |  |  |
| SARS-CoV-2 Reference Genome NC_045512.2 | (10791) | 10791                                                                                 | 10800 | 10810 | 10820 | 10830 | 10840 | 10850 | 10860 | 10873 |  |  |
|                                         | (10656) | CAGTTAATGTTTTAGCTTGGTTGTACGCTGCTGTTATAAATGGAGACAGGTGGTTTCTCAATCGATTTACCACAACCTCTTAAT  |       |       |       |       |       |       |       |       |  |  |
| Fig badnavirus 1 NC_017830.1            |         | (7141)                                                                                | ----- |       |       |       |       |       |       |       |  |  |
|                                         |         | Section 132                                                                           |       |       |       |       |       |       |       |       |  |  |
| SARS-CoV-2 Reference Genome NC_045512.2 | (10874) | 10874                                                                                 | 10880 | 10890 | 10900 | 10910 | 10920 | 10930 | 10940 | 10956 |  |  |
|                                         | (10739) | GACTTTAACTTGTGGCTATGAAGTACAATTATGAACCTCTAACACAAGACCATGTTGACATACTAGGACCTCTTTCTGCTCA    |       |       |       |       |       |       |       |       |  |  |
| Fig badnavirus 1 NC_017830.1            |         | (7141)                                                                                | ----- |       |       |       |       |       |       |       |  |  |
|                                         |         | Section 133                                                                           |       |       |       |       |       |       |       |       |  |  |
| SARS-CoV-2 Reference Genome NC_045512.2 | (10957) | 10957                                                                                 | 10970 | 10980 | 10990 | 11000 | 11010 | 11020 | 11039 |       |  |  |
|                                         | (10822) | AACTGGAATTGCCGTTTTAGATATGTGTGCTTCATTAAAAGAATTACTGCAAAATGGTATGAATGGACGTACCATATTGGGTA   |       |       |       |       |       |       |       |       |  |  |
| Fig badnavirus 1 NC_017830.1            |         | (7141)                                                                                | ----- |       |       |       |       |       |       |       |  |  |

SARS-CoV-2 & Fig badnavirus 1.apr

|                                         |         |                                                                                      |       |       |       |       |       |       |       |       |  |  |
|-----------------------------------------|---------|--------------------------------------------------------------------------------------|-------|-------|-------|-------|-------|-------|-------|-------|--|--|
|                                         |         | Section 134                                                                          |       |       |       |       |       |       |       |       |  |  |
| SARS-CoV-2 Reference Genome NC_045512.2 | (11040) | 11040                                                                                | 11050 | 11060 | 11070 | 11080 | 11090 | 11100 | 11110 | 11122 |  |  |
|                                         | (10905) | GTGCTTTATTAGAAGATGAATTTACACCTTTTGATGTTGTTAGACAATGCTCAGGTGTTACTTTCCAAAGTGCAGTGAAAAGA  |       |       |       |       |       |       |       |       |  |  |
| Fig badnavirus 1 NC_017830.1            |         | (7141)                                                                               | ----- |       |       |       |       |       |       |       |  |  |
|                                         |         | Section 135                                                                          |       |       |       |       |       |       |       |       |  |  |
| SARS-CoV-2 Reference Genome NC_045512.2 | (11123) | 11123                                                                                | 11130 | 11140 | 11150 | 11160 | 11170 | 11180 | 11190 | 11205 |  |  |
|                                         | (10988) | ACAATCAAGGGTACACACCACTGGTTGTTACTCACAATTTTGACTTCACCTTTTAGTTTTAGTCCAGAGTACTCAATGGTCTTT |       |       |       |       |       |       |       |       |  |  |
| Fig badnavirus 1 NC_017830.1            |         | (7141)                                                                               | ----- |       |       |       |       |       |       |       |  |  |
|                                         |         | Section 136                                                                          |       |       |       |       |       |       |       |       |  |  |
| SARS-CoV-2 Reference Genome NC_045512.2 | (11206) | 11206                                                                                | 11220 | 11230 | 11240 | 11250 | 11260 | 11270 | 11288 |       |  |  |
|                                         | (11071) | GTTCTTTTTTTTGTATGAAAATGCCTTTTTACCTTTTGCTATGGGTATTATTGCTATGTCTGCTTTTGCAATGATGTTTGTCA  |       |       |       |       |       |       |       |       |  |  |
| Fig badnavirus 1 NC_017830.1            |         | (7141)                                                                               | ----- |       |       |       |       |       |       |       |  |  |
|                                         |         | Section 137                                                                          |       |       |       |       |       |       |       |       |  |  |
| SARS-CoV-2 Reference Genome NC_045512.2 | (11289) | 11289                                                                                | 11300 | 11310 | 11320 | 11330 | 11340 | 11350 | 11360 | 11371 |  |  |
|                                         | (11154) | AACATAAGCATGCATTTCTCTGTTTGTGTTTGTACCTTCTCTTGCCACTGTAGCTTATTTTAATATGGTCTATATGCCTGCT   |       |       |       |       |       |       |       |       |  |  |
| Fig badnavirus 1 NC_017830.1            |         | (7141)                                                                               | ----- |       |       |       |       |       |       |       |  |  |
|                                         |         | Section 138                                                                          |       |       |       |       |       |       |       |       |  |  |
| SARS-CoV-2 Reference Genome NC_045512.2 | (11372) | 11372                                                                                | 11380 | 11390 | 11400 | 11410 | 11420 | 11430 | 11440 | 11454 |  |  |
|                                         | (11237) | AGTTGGGTGATGCGTATTATGACATGGTTGGATATGGTTGATACTAGTTTGTCTGGTTTTAAGCTAAAAGACTGTGTTATGTA  |       |       |       |       |       |       |       |       |  |  |
| Fig badnavirus 1 NC_017830.1            |         | (7141)                                                                               | ----- |       |       |       |       |       |       |       |  |  |
|                                         |         | Section 139                                                                          |       |       |       |       |       |       |       |       |  |  |
| SARS-CoV-2 Reference Genome NC_045512.2 | (11455) | 11455                                                                                | 11460 | 11470 | 11480 | 11490 | 11500 | 11510 | 11520 | 11537 |  |  |
|                                         | (11320) | TGCATCAGCTGTAGTGTTACTAATCCTTATGACAGCAAGAACTGTGTATGATGATGGTGCTAGGAGAGTGTGGACACTTATGA  |       |       |       |       |       |       |       |       |  |  |
| Fig badnavirus 1 NC_017830.1            |         | (7141)                                                                               | ----- |       |       |       |       |       |       |       |  |  |
|                                         |         | Section 140                                                                          |       |       |       |       |       |       |       |       |  |  |
| SARS-CoV-2 Reference Genome NC_045512.2 | (11538) | 11538                                                                                | 11550 | 11560 | 11570 | 11580 | 11590 | 11600 | 11610 | 11620 |  |  |
|                                         | (11403) | ATGTCTTGACACTCGTTTATAAAGTTTATTATGGTAATGCTTTAGATCAAGCCATTTCCATGTGGGCTCTTATAATCTCTGTT  |       |       |       |       |       |       |       |       |  |  |
| Fig badnavirus 1 NC_017830.1            |         | (7141)                                                                               | ----- |       |       |       |       |       |       |       |  |  |

SARS-CoV-2 & Fig badnavirus 1.apr

|                                         |         |                                                                                      |       |       |       |       |       |       |       |       |
|-----------------------------------------|---------|--------------------------------------------------------------------------------------|-------|-------|-------|-------|-------|-------|-------|-------|
|                                         |         | Section 141                                                                          |       |       |       |       |       |       |       |       |
| SARS-CoV-2 Reference Genome NC_045512.2 | (11621) | 11621                                                                                | 11630 | 11640 | 11650 | 11660 | 11670 | 11680 | 11690 | 11703 |
|                                         | (11486) | ACTTCTAACTACTCAGGTGTAGTTACAACGTGCATGTTTTGGCCAGAGGTATTGTTTTATGTGTGTTGAGTATTGCCCTAT    |       |       |       |       |       |       |       |       |
| Fig badnavirus 1 NC_017830.1            |         | (7141)                                                                               | ----- |       |       |       |       |       |       |       |
|                                         |         | Section 142                                                                          |       |       |       |       |       |       |       |       |
| SARS-CoV-2 Reference Genome NC_045512.2 | (11704) | 11704                                                                                | 11710 | 11720 | 11730 | 11740 | 11750 | 11760 | 11770 | 11786 |
|                                         | (11569) | TTTCTTCATAACTGGTAATACACTTCAGTGTATAATGCTAGTTTATTGTTTCTTAGGCTATTTTGTACTTGTTACTTTGGCC   |       |       |       |       |       |       |       |       |
| Fig badnavirus 1 NC_017830.1            |         | (7141)                                                                               | ----- |       |       |       |       |       |       |       |
|                                         |         | Section 143                                                                          |       |       |       |       |       |       |       |       |
| SARS-CoV-2 Reference Genome NC_045512.2 | (11787) | 11787                                                                                | 11800 | 11810 | 11820 | 11830 | 11840 | 11850 | 11869 |       |
|                                         | (11652) | TCTTTTGTTTACTCAACCGCTACTTTAGACTGACTCTTGGTGTTTATGATTACTTAGTTTCTACACAGGAGTTTAGATATATG  |       |       |       |       |       |       |       |       |
| Fig badnavirus 1 NC_017830.1            |         | (7141)                                                                               | ----- |       |       |       |       |       |       |       |
|                                         |         | Section 144                                                                          |       |       |       |       |       |       |       |       |
| SARS-CoV-2 Reference Genome NC_045512.2 | (11870) | 11870                                                                                | 11880 | 11890 | 11900 | 11910 | 11920 | 11930 | 11940 | 11952 |
|                                         | (11735) | AATTCACAGGGACTACTCCCACCCAAGAATAGCATAGATGCCTTCAAACCTCAACATTAAATTGTTGGGTGTTGGTGGCAAACC |       |       |       |       |       |       |       |       |
| Fig badnavirus 1 NC_017830.1            |         | (7141)                                                                               | ----- |       |       |       |       |       |       |       |
|                                         |         | Section 145                                                                          |       |       |       |       |       |       |       |       |
| SARS-CoV-2 Reference Genome NC_045512.2 | (11953) | 11953                                                                                | 11960 | 11970 | 11980 | 11990 | 12000 | 12010 | 12020 | 12035 |
|                                         | (11818) | TTGTATCAAAGTAGCCACTGTACAGTCTAAAATGTCAGATGTAAAGTGCACATCAGTAGTCTTACTCTCAGTTTTGCAACAAC  |       |       |       |       |       |       |       |       |
| Fig badnavirus 1 NC_017830.1            |         | (7141)                                                                               | ----- |       |       |       |       |       |       |       |
|                                         |         | Section 146                                                                          |       |       |       |       |       |       |       |       |
| SARS-CoV-2 Reference Genome NC_045512.2 | (12036) | 12036                                                                                | 12050 | 12060 | 12070 | 12080 | 12090 | 12100 | 12118 |       |
|                                         | (11901) | TCAGAGTAGAATCATCATCTAAATTGTGGGCTCAATGTGTCCAGTTACACAATGACATTCTCTTAGCTAAAGATACTACTGAA  |       |       |       |       |       |       |       |       |
| Fig badnavirus 1 NC_017830.1            |         | (7141)                                                                               | ----- |       |       |       |       |       |       |       |
|                                         |         | Section 147                                                                          |       |       |       |       |       |       |       |       |
| SARS-CoV-2 Reference Genome NC_045512.2 | (12119) | 12119                                                                                | 12130 | 12140 | 12150 | 12160 | 12170 | 12180 | 12190 | 12201 |
|                                         | (11984) | GCCTTTGAAAAAATGGTTTCACTACTTTCTGTTTTGCTTTCCATGCAGGGTGCTGTAGACATAAACAAGCTTTGTGAAGAAAT  |       |       |       |       |       |       |       |       |
| Fig badnavirus 1 NC_017830.1            |         | (7141)                                                                               | ----- |       |       |       |       |       |       |       |

## SARS-CoV-2 &amp; Fig badnavirus 1.apr

|                                         |         |                                                                                      |       |       |       |       |       |       |       |       |  |
|-----------------------------------------|---------|--------------------------------------------------------------------------------------|-------|-------|-------|-------|-------|-------|-------|-------|--|
|                                         |         | Section 148                                                                          |       |       |       |       |       |       |       |       |  |
|                                         | (12202) | 12202                                                                                | 12210 | 12220 | 12230 | 12240 | 12250 | 12260 | 12270 | 12284 |  |
| SARS-CoV-2 Reference Genome NC_045512.2 | (12067) | GCTGGACAACAGGGCAACCTTACAAGCTATAGCCTCAGAGTTTAGTTCCCTTCCATCATATGCAGCTTTTGCTACTGCTCAAG  |       |       |       |       |       |       |       |       |  |
| Fig badnavirus 1 NC_017830.1            | (7141)  | -----                                                                                |       |       |       |       |       |       |       |       |  |
|                                         |         | Section 149                                                                          |       |       |       |       |       |       |       |       |  |
|                                         | (12285) | 12285                                                                                | 12290 | 12300 | 12310 | 12320 | 12330 | 12340 | 12350 | 12367 |  |
| SARS-CoV-2 Reference Genome NC_045512.2 | (12150) | AAGCTTATGAGCAGGCTGTTGCTAATGGTGATTCTGAAGTTGTTCTTAAAAAGTTGAAGAAGTCTTTGAATGTGGCTAAATCT  |       |       |       |       |       |       |       |       |  |
| Fig badnavirus 1 NC_017830.1            | (7141)  | -----                                                                                |       |       |       |       |       |       |       |       |  |
|                                         |         | Section 150                                                                          |       |       |       |       |       |       |       |       |  |
|                                         | (12368) | 12368                                                                                | 12380 | 12390 | 12400 | 12410 | 12420 | 12430 | 12440 | 12450 |  |
| SARS-CoV-2 Reference Genome NC_045512.2 | (12233) | GAATTTGACCGTGATGCAGCCATGCAACGTAAGTTGGAAAAGATGGCTGATCAAGCTATGACCCAAATGTATAAACAGGCTAG  |       |       |       |       |       |       |       |       |  |
| Fig badnavirus 1 NC_017830.1            | (7141)  | -----                                                                                |       |       |       |       |       |       |       |       |  |
|                                         |         | Section 151                                                                          |       |       |       |       |       |       |       |       |  |
|                                         | (12451) | 12451                                                                                | 12460 | 12470 | 12480 | 12490 | 12500 | 12510 | 12520 | 12533 |  |
| SARS-CoV-2 Reference Genome NC_045512.2 | (12316) | ATCTGAGGACAAGAGGGCAAAAGTTACTAGTGCTATGCAGACAATGCTTTTCACTATGCTTAGAAAGTTGGATAATGATGCAC  |       |       |       |       |       |       |       |       |  |
| Fig badnavirus 1 NC_017830.1            | (7141)  | -----                                                                                |       |       |       |       |       |       |       |       |  |
|                                         |         | Section 152                                                                          |       |       |       |       |       |       |       |       |  |
|                                         | (12534) | 12534                                                                                | 12540 | 12550 | 12560 | 12570 | 12580 | 12590 | 12600 | 12616 |  |
| SARS-CoV-2 Reference Genome NC_045512.2 | (12399) | TCAACAACATTATCAACAATGCAAGAGATGGTTGTGTTCCCTTGAACATAATACCTCTTACAACAGCAGCCAACTAATGGTT   |       |       |       |       |       |       |       |       |  |
| Fig badnavirus 1 NC_017830.1            | (7141)  | -----                                                                                |       |       |       |       |       |       |       |       |  |
|                                         |         | Section 153                                                                          |       |       |       |       |       |       |       |       |  |
|                                         | (12617) | 12617                                                                                | 12630 | 12640 | 12650 | 12660 | 12670 | 12680 |       | 12699 |  |
| SARS-CoV-2 Reference Genome NC_045512.2 | (12482) | GTCATACCAGACTATAACACATATAAAAAATACGTGTGATGGTACAACATTTACTTATGCATCAGCATTGTGGGAAATCCAACA |       |       |       |       |       |       |       |       |  |
| Fig badnavirus 1 NC_017830.1            | (7141)  | -----                                                                                |       |       |       |       |       |       |       |       |  |
|                                         |         | Section 154                                                                          |       |       |       |       |       |       |       |       |  |
|                                         | (12700) | 12700                                                                                | 12710 | 12720 | 12730 | 12740 | 12750 | 12760 | 12770 | 12782 |  |
| SARS-CoV-2 Reference Genome NC_045512.2 | (12565) | GGTTGTAGATGCAGATAGTAAATTTGTTCAACTTAGTGAAATTAGTATGGACAATTCACCTAATTTAGCATGGCCTCTTATTG  |       |       |       |       |       |       |       |       |  |
| Fig badnavirus 1 NC_017830.1            | (7141)  | -----                                                                                |       |       |       |       |       |       |       |       |  |

## SARS-CoV-2 &amp; Fig badnavirus 1.apr

|                                         |         |                                                                                     |       |       |       |       |       |       |       |
|-----------------------------------------|---------|-------------------------------------------------------------------------------------|-------|-------|-------|-------|-------|-------|-------|
|                                         |         | Section 155                                                                         |       |       |       |       |       |       |       |
|                                         | (12783) | 12783                                                                               | 12790 | 12800 | 12810 | 12820 | 12830 | 12840 | 12850 |
| SARS-CoV-2 Reference Genome NC_045512.2 | (12648) | TAACAGCTTTAAGGGCCAATTCTGCTGTCAAATTACAGAATAATGAGCTTAGTCCTGTTGCACTACGACAGATGTCTTGTGCT |       |       |       |       |       |       |       |
| Fig badnavirus 1 NC_017830.1            | (7141)  | -----                                                                               |       |       |       |       |       |       |       |
|                                         |         | Section 156                                                                         |       |       |       |       |       |       |       |
|                                         | (12866) | 12866                                                                               | 12880 | 12890 | 12900 | 12910 | 12920 | 12930 | 12948 |
| SARS-CoV-2 Reference Genome NC_045512.2 | (12731) | GCCGGTACTACACAACTGCTTGCACTGATGACAATGCGTTAGCTTACTACAACACAACAAAGGGAGGTAGGTTTGTACTTGC  |       |       |       |       |       |       |       |
| Fig badnavirus 1 NC_017830.1            | (7141)  | -----                                                                               |       |       |       |       |       |       |       |
|                                         |         | Section 157                                                                         |       |       |       |       |       |       |       |
|                                         | (12949) | 12949                                                                               | 12960 | 12970 | 12980 | 12990 | 13000 | 13010 | 13020 |
| SARS-CoV-2 Reference Genome NC_045512.2 | (12814) | ACTGTTATCCGATTTACAGGATTTGAAATGGGCTAGATTCCCTAAGAGTGATGGAAGTGGTACTATCTATACAGAACTGGAAC |       |       |       |       |       |       |       |
| Fig badnavirus 1 NC_017830.1            | (7141)  | -----                                                                               |       |       |       |       |       |       |       |
|                                         |         | Section 158                                                                         |       |       |       |       |       |       |       |
|                                         | (13032) | 13032                                                                               | 13040 | 13050 | 13060 | 13070 | 13080 | 13090 | 13100 |
| SARS-CoV-2 Reference Genome NC_045512.2 | (12897) | CACCTTGTAGGTTTGTACAGACACACCTAAAGGTCCTAAAGTGAAGTATTTATACTTTATTAAAGGATTAAACAACCTAAAT  |       |       |       |       |       |       |       |
| Fig badnavirus 1 NC_017830.1            | (7141)  | -----                                                                               |       |       |       |       |       |       |       |
|                                         |         | Section 159                                                                         |       |       |       |       |       |       |       |
|                                         | (13115) | 13115                                                                               | 13120 | 13130 | 13140 | 13150 | 13160 | 13170 | 13180 |
| SARS-CoV-2 Reference Genome NC_045512.2 | (12980) | AGAGGTATGGTACTTGGTAGTTTAGCTGCCACAGTACGTCTACAAGCTGGTAATGCAACAGAAGTGCCTGCCAATTCAACTGT |       |       |       |       |       |       |       |
| Fig badnavirus 1 NC_017830.1            | (7141)  | -----                                                                               |       |       |       |       |       |       |       |
|                                         |         | Section 160                                                                         |       |       |       |       |       |       |       |
|                                         | (13198) | 13198                                                                               | 13210 | 13220 | 13230 | 13240 | 13250 | 13260 | 13270 |
| SARS-CoV-2 Reference Genome NC_045512.2 | (13063) | ATTATCTTTCTGTGCTTTTGCTGTAGATGCTGCTAAAGCTTACAAAGATTATCTAGCTAGTGGGGGACAACCAATCACTAATT |       |       |       |       |       |       |       |
| Fig badnavirus 1 NC_017830.1            | (7141)  | -----                                                                               |       |       |       |       |       |       |       |
|                                         |         | Section 161                                                                         |       |       |       |       |       |       |       |
|                                         | (13281) | 13281                                                                               | 13290 | 13300 | 13310 | 13320 | 13330 | 13340 | 13350 |
| SARS-CoV-2 Reference Genome NC_045512.2 | (13146) | GTGTTAAGATGTTGTGTACACACACTGGTACTGGTCAGGCAATAACAGTTACACCGGAAGCCAATATGGATCAAGAATCCTTT |       |       |       |       |       |       |       |
| Fig badnavirus 1 NC_017830.1            | (7141)  | -----                                                                               |       |       |       |       |       |       |       |
|                                         |         | Section 161                                                                         |       |       |       |       |       |       |       |
|                                         | (13281) | 13281                                                                               | 13290 | 13300 | 13310 | 13320 | 13330 | 13340 | 13350 |
| SARS-CoV-2 Reference Genome NC_045512.2 | (13146) | GTGTTAAGATGTTGTGTACACACACTGGTACTGGTCAGGCAATAACAGTTACACCGGAAGCCAATATGGATCAAGAATCCTTT |       |       |       |       |       |       |       |
| Fig badnavirus 1 NC_017830.1            | (7141)  | -----                                                                               |       |       |       |       |       |       |       |

SARS-CoV-2 & Fig badnavirus 1.apr

|                                         |         |                                                                                      |       |       |       |       |       |       |       |       |
|-----------------------------------------|---------|--------------------------------------------------------------------------------------|-------|-------|-------|-------|-------|-------|-------|-------|
|                                         |         | Section 162                                                                          |       |       |       |       |       |       |       |       |
|                                         | (13364) | 13364                                                                                | 13370 | 13380 | 13390 | 13400 | 13410 | 13420 | 13430 | 13446 |
| SARS-CoV-2 Reference Genome NC_045512.2 | (13229) | GGTGGTGCATCGTGTGTCTGTACTGCCGTTGCCACATAGATCATCCAAATCCTAAAGGATTTTGTGACTTAAAAGGTAAGTA   |       |       |       |       |       |       |       |       |
| Fig badnavirus 1 NC_017830.1            | (7141)  | -----                                                                                |       |       |       |       |       |       |       |       |
|                                         |         | Section 163                                                                          |       |       |       |       |       |       |       |       |
|                                         | (13447) | 13447                                                                                | 13460 | 13470 | 13480 | 13490 | 13500 | 13510 |       | 13529 |
| SARS-CoV-2 Reference Genome NC_045512.2 | (13312) | TGTACAAATACCTACAACCTGTGCTAATGACCCTGTGGGTTTTACACTTAAAAACACAGTCTGTACCGTCTGCGGTATGTGGA  |       |       |       |       |       |       |       |       |
| Fig badnavirus 1 NC_017830.1            | (7141)  | -----                                                                                |       |       |       |       |       |       |       |       |
|                                         |         | Section 164                                                                          |       |       |       |       |       |       |       |       |
|                                         | (13530) | 13530                                                                                | 13540 | 13550 | 13560 | 13570 | 13580 | 13590 | 13600 | 13612 |
| SARS-CoV-2 Reference Genome NC_045512.2 | (13395) | AAGGTTATGGCTGTAGTTGTGATCAACTCCGCGAACCCTATGCTTCAGTCAGCTGATGCACAATCGTTTTTAAACGGGTTTGCG |       |       |       |       |       |       |       |       |
| Fig badnavirus 1 NC_017830.1            | (7141)  | -----                                                                                |       |       |       |       |       |       |       |       |
|                                         |         | Section 165                                                                          |       |       |       |       |       |       |       |       |
|                                         | (13613) | 13613                                                                                | 13620 | 13630 | 13640 | 13650 | 13660 | 13670 | 13680 | 13695 |
| SARS-CoV-2 Reference Genome NC_045512.2 | (13478) | GTGTAAGTGCAGCCCGTCTTACACCGTGCGGCACAGGCACTAGTACTGATGTTCGTATACAGGGCTTTTGACATCTACAATGAT |       |       |       |       |       |       |       |       |
| Fig badnavirus 1 NC_017830.1            | (7141)  | -----                                                                                |       |       |       |       |       |       |       |       |
|                                         |         | Section 166                                                                          |       |       |       |       |       |       |       |       |
|                                         | (13696) | 13696                                                                                | 13710 | 13720 | 13730 | 13740 | 13750 | 13760 |       | 13778 |
| SARS-CoV-2 Reference Genome NC_045512.2 | (13561) | AAAGTAGCTGGTTTTGCTAAATTCCTAAAACTAATTGTTGTCGCTTCCAAGAAAAGGACGAAGATGACAATTTAATTGATTC   |       |       |       |       |       |       |       |       |
| Fig badnavirus 1 NC_017830.1            | (7141)  | -----                                                                                |       |       |       |       |       |       |       |       |
|                                         |         | Section 167                                                                          |       |       |       |       |       |       |       |       |
|                                         | (13779) | 13779                                                                                | 13790 | 13800 | 13810 | 13820 | 13830 | 13840 | 13850 | 13861 |
| SARS-CoV-2 Reference Genome NC_045512.2 | (13644) | TTACTTTGTAGTTAAGAGACACACTTCTCTAACTACCAACATGAAGAAACAATTTATAATTTACTTAAGGATTGTCCAGCTG   |       |       |       |       |       |       |       |       |
| Fig badnavirus 1 NC_017830.1            | (7141)  | -----                                                                                |       |       |       |       |       |       |       |       |
|                                         |         | Section 168                                                                          |       |       |       |       |       |       |       |       |
|                                         | (13862) | 13862                                                                                | 13870 | 13880 | 13890 | 13900 | 13910 | 13920 | 13930 | 13944 |
| SARS-CoV-2 Reference Genome NC_045512.2 | (13727) | TTGCTAAACATGACTTCTTTAAGTTTAGAATAGACGGTGACATGGTACCACATATATCACGTCAACGTCTTACTAAATACACA  |       |       |       |       |       |       |       |       |
| Fig badnavirus 1 NC_017830.1            | (7141)  | -----                                                                                |       |       |       |       |       |       |       |       |



## SARS-CoV-2 &amp; Fig badnavirus 1.apr

|                                         |         |                                                                                       |       |       |       |       |       |       |       |       |
|-----------------------------------------|---------|---------------------------------------------------------------------------------------|-------|-------|-------|-------|-------|-------|-------|-------|
|                                         |         | Section 169                                                                           |       |       |       |       |       |       |       |       |
|                                         | (13945) | 13945                                                                                 | 13950 | 13960 | 13970 | 13980 | 13990 | 14000 | 14010 | 14027 |
| SARS-CoV-2 Reference Genome NC_045512.2 | (13810) | ATGGCAGACCTCGTCTATGCTTTAAGGCATTTTGATGAAGGTAATTGTGACACATTAAAAGAAATACTTGTACATACAATTG    |       |       |       |       |       |       |       |       |
| Fig badnavirus 1 NC_017830.1            | (7141)  | -----                                                                                 |       |       |       |       |       |       |       |       |
|                                         |         | Section 170                                                                           |       |       |       |       |       |       |       |       |
|                                         | (14028) | 14028                                                                                 | 14040 | 14050 | 14060 | 14070 | 14080 | 14090 | 14100 | 14110 |
| SARS-CoV-2 Reference Genome NC_045512.2 | (13893) | TTGTGATGATGATTATTTCAATAAAAAGGACTGGTATGATTTTGTAGAAAACCCAGATATATTACGCGTATACGCCAACTTAG   |       |       |       |       |       |       |       |       |
| Fig badnavirus 1 NC_017830.1            | (7141)  | -----                                                                                 |       |       |       |       |       |       |       |       |
|                                         |         | Section 171                                                                           |       |       |       |       |       |       |       |       |
|                                         | (14111) | 14111                                                                                 | 14120 | 14130 | 14140 | 14150 | 14160 | 14170 | 14180 | 14193 |
| SARS-CoV-2 Reference Genome NC_045512.2 | (13976) | GTGAACGTGTACGCCAAGCTTTGTTAAAAACAGTACAATTCTGTGATGCCATGCGAAATGCTGGTATTGTTGGTGTACTGACA   |       |       |       |       |       |       |       |       |
| Fig badnavirus 1 NC_017830.1            | (7141)  | -----                                                                                 |       |       |       |       |       |       |       |       |
|                                         |         | Section 172                                                                           |       |       |       |       |       |       |       |       |
|                                         | (14194) | 14194                                                                                 | 14200 | 14210 | 14220 | 14230 | 14240 | 14250 | 14260 | 14276 |
| SARS-CoV-2 Reference Genome NC_045512.2 | (14059) | TTAGATAATCAAGATCTCAATGGTAACTGGTATGATTTCCGGTGATTTTCATACAAACCACGCCAGGTAGTGGAGTTCCTGTTGT |       |       |       |       |       |       |       |       |
| Fig badnavirus 1 NC_017830.1            | (7141)  | -----                                                                                 |       |       |       |       |       |       |       |       |
|                                         |         | Section 173                                                                           |       |       |       |       |       |       |       |       |
|                                         | (14277) | 14277                                                                                 | 14290 | 14300 | 14310 | 14320 | 14330 | 14340 |       | 14359 |
| SARS-CoV-2 Reference Genome NC_045512.2 | (14142) | AGATTCTTATTATTCATTGTTAATGCCTATATTAACCTTGACCAGGGCTTTAACTGCAGAGTCACATGTTGACACTGACTTAA   |       |       |       |       |       |       |       |       |
| Fig badnavirus 1 NC_017830.1            | (7141)  | -----                                                                                 |       |       |       |       |       |       |       |       |
|                                         |         | Section 174                                                                           |       |       |       |       |       |       |       |       |
|                                         | (14360) | 14360                                                                                 | 14370 | 14380 | 14390 | 14400 | 14410 | 14420 | 14430 | 14442 |
| SARS-CoV-2 Reference Genome NC_045512.2 | (14225) | CAAAGCCTTACATTAAGTGGGATTTGTTAAAAATATGACTTCACGGAAGAGAGGTTAAACTCTTTGACCGTTATTTTAAATAT   |       |       |       |       |       |       |       |       |
| Fig badnavirus 1 NC_017830.1            | (7141)  | -----                                                                                 |       |       |       |       |       |       |       |       |
|                                         |         | Section 175                                                                           |       |       |       |       |       |       |       |       |
|                                         | (14443) | 14443                                                                                 | 14450 | 14460 | 14470 | 14480 | 14490 | 14500 | 14510 | 14525 |
| SARS-CoV-2 Reference Genome NC_045512.2 | (14308) | TGGGATCAGACATACCACCCAAATTGTGTTAACTGTTTGGATGACAGATGCATTCTGCATTGTGCAAACCTTTAATGTTTTATT  |       |       |       |       |       |       |       |       |
| Fig badnavirus 1 NC_017830.1            | (7141)  | -----                                                                                 |       |       |       |       |       |       |       |       |

## SARS-CoV-2 &amp; Fig badnavirus 1.apr

|                                         |         |                                                                                      |       |       |       |       |       |       |             |
|-----------------------------------------|---------|--------------------------------------------------------------------------------------|-------|-------|-------|-------|-------|-------|-------------|
|                                         |         | Section 176                                                                          |       |       |       |       |       |       |             |
|                                         | (14526) | 14526                                                                                | 14540 | 14550 | 14560 | 14570 | 14580 | 14590 | 14608       |
| SARS-CoV-2 Reference Genome NC_045512.2 | (14391) | CTCTACAGTGTTCCACCTACAAGTTTTGGACCACTAGTGAGAAAAATATTTGTTGATGGTGTTCATTTGTAGTTTCAACTG    |       |       |       |       |       |       |             |
| Fig badnavirus 1 NC_017830.1            | (7141)  | -----                                                                                |       |       |       |       |       |       |             |
|                                         |         | Section 177                                                                          |       |       |       |       |       |       |             |
|                                         | (14609) | 14609                                                                                | 14620 | 14630 | 14640 | 14650 | 14660 | 14670 | 14680 14691 |
| SARS-CoV-2 Reference Genome NC_045512.2 | (14474) | GATACCACTTCAGAGAGCTAGGTGTTGTACATAATCAGGATGTAACTTACATAGCTCTAGACTTAGTTTTAAGGAATTACTT   |       |       |       |       |       |       |             |
| Fig badnavirus 1 NC_017830.1            | (7141)  | -----                                                                                |       |       |       |       |       |       |             |
|                                         |         | Section 178                                                                          |       |       |       |       |       |       |             |
|                                         | (14692) | 14692                                                                                | 14700 | 14710 | 14720 | 14730 | 14740 | 14750 | 14760 14774 |
| SARS-CoV-2 Reference Genome NC_045512.2 | (14557) | GTGTATGCTGCTGACCCCTGCTATGCACGCTGCTTCTGGTAATCTATTACTAGATAAACGCACTACGTGCTTTTCAGTAGCTGC |       |       |       |       |       |       |             |
| Fig badnavirus 1 NC_017830.1            | (7141)  | -----                                                                                |       |       |       |       |       |       |             |
|                                         |         | Section 179                                                                          |       |       |       |       |       |       |             |
|                                         | (14775) | 14775                                                                                | 14780 | 14790 | 14800 | 14810 | 14820 | 14830 | 14840 14857 |
| SARS-CoV-2 Reference Genome NC_045512.2 | (14640) | ACTTACTAACAATGTTGCTTTTCAAACCTGTCAAACCCGGTAATTTTAACAAAGACTTCTATGACTTTGCTGTGTCTAAGGGTT |       |       |       |       |       |       |             |
| Fig badnavirus 1 NC_017830.1            | (7141)  | -----                                                                                |       |       |       |       |       |       |             |
|                                         |         | Section 180                                                                          |       |       |       |       |       |       |             |
|                                         | (14858) | 14858                                                                                | 14870 | 14880 | 14890 | 14900 | 14910 | 14920 | 14930 14940 |
| SARS-CoV-2 Reference Genome NC_045512.2 | (14723) | TCTTTAAGGAAGGAAGTTCTGTTGAATTAAACACTTCTTCTTTGCTCAGGATGGTAATGCTGCTATCAGCGATTATGACTAC   |       |       |       |       |       |       |             |
| Fig badnavirus 1 NC_017830.1            | (7141)  | -----                                                                                |       |       |       |       |       |       |             |
|                                         |         | Section 181                                                                          |       |       |       |       |       |       |             |
|                                         | (14941) | 14941                                                                                | 14950 | 14960 | 14970 | 14980 | 14990 | 15000 | 15010 15023 |
| SARS-CoV-2 Reference Genome NC_045512.2 | (14806) | TATCGTTATAATCTACCAACAATGTGTGATATCAGACAACCTACTATTTGTAGTTGAAGTTGTTGATAAGTACTTTGATTGTTA |       |       |       |       |       |       |             |
| Fig badnavirus 1 NC_017830.1            | (7141)  | -----                                                                                |       |       |       |       |       |       |             |
|                                         |         | Section 182                                                                          |       |       |       |       |       |       |             |
|                                         | (15024) | 15024                                                                                | 15030 | 15040 | 15050 | 15060 | 15070 | 15080 | 15090 15106 |
| SARS-CoV-2 Reference Genome NC_045512.2 | (14889) | CGATGGTGGCTGTATTAATGCTAACCAAGTCATCGTCAACAACCTAGACAAATCAGCTGGTTTTCCATTTAATAAATGGGGTA  |       |       |       |       |       |       |             |
| Fig badnavirus 1 NC_017830.1            | (7141)  | -----                                                                                |       |       |       |       |       |       |             |

## SARS-CoV-2 &amp; Fig badnavirus 1.apr

|                                         |         |                                                                                      |       |       |       |       |       |       |             |
|-----------------------------------------|---------|--------------------------------------------------------------------------------------|-------|-------|-------|-------|-------|-------|-------------|
|                                         |         | Section 183                                                                          |       |       |       |       |       |       |             |
|                                         | (15107) | 15107                                                                                | 15120 | 15130 | 15140 | 15150 | 15160 | 15170 | 15189       |
| SARS-CoV-2 Reference Genome NC_045512.2 | (14972) | AGGCTAGACTTTATTATGATTCAATGAGTTATGAGGATCAAGATGCACCTTTTCGCATATACAAAACGTAATGTCATCCCTACT |       |       |       |       |       |       |             |
| Fig badnavirus 1 NC_017830.1            | (7141)  | -----                                                                                |       |       |       |       |       |       |             |
|                                         |         | Section 184                                                                          |       |       |       |       |       |       |             |
|                                         | (15190) | 15190                                                                                | 15200 | 15210 | 15220 | 15230 | 15240 | 15250 | 15260 15272 |
| SARS-CoV-2 Reference Genome NC_045512.2 | (15055) | ATAACTCAAATGAATCTTAAGTATGCCATTAGTGCAAAGAATAGAGCTCGCACCGTAGCTGGTGTCTCTATCTGTAGTACTACT |       |       |       |       |       |       |             |
| Fig badnavirus 1 NC_017830.1            | (7141)  | -----                                                                                |       |       |       |       |       |       |             |
|                                         |         | Section 185                                                                          |       |       |       |       |       |       |             |
|                                         | (15273) | 15273                                                                                | 15280 | 15290 | 15300 | 15310 | 15320 | 15330 | 15340 15355 |
| SARS-CoV-2 Reference Genome NC_045512.2 | (15138) | GACCAATAGACAGTTTCATCAAAAATTATTGAAATCAATAGCCGCCACTAGAGGAGCTACTGTAGTAATTGGAACAAGCAAAT  |       |       |       |       |       |       |             |
| Fig badnavirus 1 NC_017830.1            | (7141)  | -----                                                                                |       |       |       |       |       |       |             |
|                                         |         | Section 186                                                                          |       |       |       |       |       |       |             |
|                                         | (15356) | 15356                                                                                | 15370 | 15380 | 15390 | 15400 | 15410 | 15420 | 15438       |
| SARS-CoV-2 Reference Genome NC_045512.2 | (15221) | TCTATGGTGGTTGGCACAACATGTTAAAACTGTTTATAGTGATGTAGAAAACCTCACCTTATGGGTTGGGATTATCCTAAA    |       |       |       |       |       |       |             |
| Fig badnavirus 1 NC_017830.1            | (7141)  | -----                                                                                |       |       |       |       |       |       |             |
|                                         |         | Section 187                                                                          |       |       |       |       |       |       |             |
|                                         | (15439) | 15439                                                                                | 15450 | 15460 | 15470 | 15480 | 15490 | 15500 | 15510 15521 |
| SARS-CoV-2 Reference Genome NC_045512.2 | (15304) | TGTGATAGAGCCATGCCTAACATGCTTAGAATTATGGCCTCACTTGTTCTTGCTCGCAAACATACAACGTGTTGTAGCTTGTC  |       |       |       |       |       |       |             |
| Fig badnavirus 1 NC_017830.1            | (7141)  | -----                                                                                |       |       |       |       |       |       |             |
|                                         |         | Section 188                                                                          |       |       |       |       |       |       |             |
|                                         | (15522) | 15522                                                                                | 15530 | 15540 | 15550 | 15560 | 15570 | 15580 | 15590 15604 |
| SARS-CoV-2 Reference Genome NC_045512.2 | (15387) | ACACCGTTTCTATAGATTAGCTAATGAGTGTGCTCAAGTATTGAGTGAAATGGTCATGTGTGGCGGTTCACTATATGTTAAAC  |       |       |       |       |       |       |             |
| Fig badnavirus 1 NC_017830.1            | (7141)  | -----                                                                                |       |       |       |       |       |       |             |
|                                         |         | Section 189                                                                          |       |       |       |       |       |       |             |
|                                         | (15605) | 15605                                                                                | 15610 | 15620 | 15630 | 15640 | 15650 | 15660 | 15670 15687 |
| SARS-CoV-2 Reference Genome NC_045512.2 | (15470) | CAGGTGGAACCTCATCAGGAGATGCCACAACCTGCTTATGCTAATAGTGTTTTTAACATTTGTCAAGCTGTCACGGCCAATGTT |       |       |       |       |       |       |             |
| Fig badnavirus 1 NC_017830.1            | (7141)  | -----                                                                                |       |       |       |       |       |       |             |

SARS-CoV-2 & Fig badnavirus 1.apr

|                                         |         |                                                                                      |       |       |       |       |       |       |             |
|-----------------------------------------|---------|--------------------------------------------------------------------------------------|-------|-------|-------|-------|-------|-------|-------------|
|                                         |         | Section 190                                                                          |       |       |       |       |       |       |             |
|                                         | (15688) | 15688                                                                                | 15700 | 15710 | 15720 | 15730 | 15740 | 15750 | 15760 15770 |
| SARS-CoV-2 Reference Genome NC_045512.2 | (15553) | AATGCAC TTTTATCTACTGATGGTAACAAAATTGCCGATAAGTATGTCCGCAATTTACAACACAGACTTTATGAGTGTCTCTA |       |       |       |       |       |       |             |
| Fig badnavirus 1 NC_017830.1            | (7141)  | -----                                                                                |       |       |       |       |       |       |             |
|                                         |         | Section 191                                                                          |       |       |       |       |       |       |             |
|                                         | (15771) | 15771                                                                                | 15780 | 15790 | 15800 | 15810 | 15820 | 15830 | 15840 15853 |
| SARS-CoV-2 Reference Genome NC_045512.2 | (15636) | TAGAAATAGAGATGTTGACACAGACTTTGTGAATGAGTTTTACGCATATTTGCGTAAACATTTCTCAATGATGATACTCTCTG  |       |       |       |       |       |       |             |
| Fig badnavirus 1 NC_017830.1            | (7141)  | -----                                                                                |       |       |       |       |       |       |             |
|                                         |         | Section 192                                                                          |       |       |       |       |       |       |             |
|                                         | (15854) | 15854                                                                                | 15860 | 15870 | 15880 | 15890 | 15900 | 15910 | 15920 15936 |
| SARS-CoV-2 Reference Genome NC_045512.2 | (15719) | ACGATGCTGTTGTGTGTTTCAATAGCACTTATGCATCTCAAGGTCTAGTGGCTAGCATAAAGAACTTTAAGTCAGTTCTTTAT  |       |       |       |       |       |       |             |
| Fig badnavirus 1 NC_017830.1            | (7141)  | -----                                                                                |       |       |       |       |       |       |             |
|                                         |         | Section 193                                                                          |       |       |       |       |       |       |             |
|                                         | (15937) | 15937                                                                                | 15950 | 15960 | 15970 | 15980 | 15990 | 16000 | 16019       |
| SARS-CoV-2 Reference Genome NC_045512.2 | (15807) | TATCAAAACAATGTTTTTATGTCTGAAGCAAAATGTTGGACTGAGACTGACCTTACTAAAGGACCTCATGAATTTTGCTCTCA  |       |       |       |       |       |       |             |
| Fig badnavirus 1 NC_017830.1            | (7141)  | -----                                                                                |       |       |       |       |       |       |             |
|                                         |         | Section 194                                                                          |       |       |       |       |       |       |             |
|                                         | (16020) | 16020                                                                                | 16030 | 16040 | 16050 | 16060 | 16070 | 16080 | 16090 16102 |
| SARS-CoV-2 Reference Genome NC_045512.2 | (15885) | ACATACAATGCTAGTTAAACAGGGTGATGATTATGTGTACCTTCCTTACCCAGATCCATCAAGAATCCTAGGGGCCGGCTGTT  |       |       |       |       |       |       |             |
| Fig badnavirus 1 NC_017830.1            | (7141)  | -----                                                                                |       |       |       |       |       |       |             |
|                                         |         | Section 195                                                                          |       |       |       |       |       |       |             |
|                                         | (16103) | 16103                                                                                | 16110 | 16120 | 16130 | 16140 | 16150 | 16160 | 16170 16185 |
| SARS-CoV-2 Reference Genome NC_045512.2 | (15968) | TTGTAGATGATATCGTAAAAACAGATGGTACACTTATGATTGAACGGTTCGTGTCTTTAGCTATAGATGCTTACCCACTTACT  |       |       |       |       |       |       |             |
| Fig badnavirus 1 NC_017830.1            | (7141)  | -----                                                                                |       |       |       |       |       |       |             |
|                                         |         | Section 196                                                                          |       |       |       |       |       |       |             |
|                                         | (16186) | 16186                                                                                | 16200 | 16210 | 16220 | 16230 | 16240 | 16250 | 16268       |
| SARS-CoV-2 Reference Genome NC_045512.2 | (16051) | AAACATCCTAATCAGGAGTATGCTGATGTCTTTCAATTTGTACTTACAATACATAAGAAAGCTACATGATGAGTTAACAGGACA |       |       |       |       |       |       |             |
| Fig badnavirus 1 NC_017830.1            | (7141)  | -----                                                                                |       |       |       |       |       |       |             |

SARS-CoV-2 & Fig badnavirus 1.apr

|                                         |         |                                                                                     |       |       |       |       |       |       |       |       |  |  |
|-----------------------------------------|---------|-------------------------------------------------------------------------------------|-------|-------|-------|-------|-------|-------|-------|-------|--|--|
|                                         |         | Section 197                                                                         |       |       |       |       |       |       |       |       |  |  |
| SARS-CoV-2 Reference Genome NC_045512.2 | (16269) | 16269                                                                               | 16280 | 16290 | 16300 | 16310 | 16320 | 16330 | 16340 | 16351 |  |  |
|                                         | (16134) | CATGTTAGACATGTATTCTGTTATGCTTACTAATGATAACACTTCAAGGTATTGGGAACCTGAGTTTTATGAGGCTATGTACA |       |       |       |       |       |       |       |       |  |  |
| Fig badnavirus 1 NC_017830.1            |         | (7141)                                                                              | ----- |       |       |       |       |       |       |       |  |  |
|                                         |         | Section 198                                                                         |       |       |       |       |       |       |       |       |  |  |
| SARS-CoV-2 Reference Genome NC_045512.2 | (16352) | 16352                                                                               | 16360 | 16370 | 16380 | 16390 | 16400 | 16410 | 16420 | 16434 |  |  |
|                                         | (16217) | CACCGCATACAGTCTTACAGGCTGTTGGGGCTTGTGTTCTTTGCAATTCACAGACTTCATTAAGATGTGGTGCTTGCATACGT |       |       |       |       |       |       |       |       |  |  |
| Fig badnavirus 1 NC_017830.1            |         | (7141)                                                                              | ----- |       |       |       |       |       |       |       |  |  |
|                                         |         | Section 199                                                                         |       |       |       |       |       |       |       |       |  |  |
| SARS-CoV-2 Reference Genome NC_045512.2 | (16435) | 16435                                                                               | 16440 | 16450 | 16460 | 16470 | 16480 | 16490 | 16500 | 16517 |  |  |
|                                         | (16300) | AGACCATTCTTATGTTGTAAATGCTGTTACGACCATGTCATATCAACATCACATAAATTAGTCTTGTCTGTTAATCCGTATGT |       |       |       |       |       |       |       |       |  |  |
| Fig badnavirus 1 NC_017830.1            |         | (7141)                                                                              | ----- |       |       |       |       |       |       |       |  |  |
|                                         |         | Section 200                                                                         |       |       |       |       |       |       |       |       |  |  |
| SARS-CoV-2 Reference Genome NC_045512.2 | (16518) | 16518                                                                               | 16530 | 16540 | 16550 | 16560 | 16570 | 16580 | 16590 | 16600 |  |  |
|                                         | (16383) | TTGCAATGCTCCAGGTTGTGATGTCACAGATGTGACTCAACTTTACTTAGGAGGTATGAGCTATTATTGTAAATCACATAAAC |       |       |       |       |       |       |       |       |  |  |
| Fig badnavirus 1 NC_017830.1            |         | (7141)                                                                              | ----- |       |       |       |       |       |       |       |  |  |
|                                         |         | Section 201                                                                         |       |       |       |       |       |       |       |       |  |  |
| SARS-CoV-2 Reference Genome NC_045512.2 | (16601) | 16601                                                                               | 16610 | 16620 | 16630 | 16640 | 16650 | 16660 | 16670 | 16683 |  |  |
|                                         | (16466) | CACCCATTAGTTTTCCATTGTGTGCTAATGGACAAGTTTTTGGTTTATATAAAAATACATGTGTTGGTAGCGATAATGTTACT |       |       |       |       |       |       |       |       |  |  |
| Fig badnavirus 1 NC_017830.1            |         | (7141)                                                                              | ----- |       |       |       |       |       |       |       |  |  |
|                                         |         | Section 202                                                                         |       |       |       |       |       |       |       |       |  |  |
| SARS-CoV-2 Reference Genome NC_045512.2 | (16684) | 16684                                                                               | 16690 | 16700 | 16710 | 16720 | 16730 | 16740 | 16750 | 16766 |  |  |
|                                         | (16549) | GACTTTAATGCAATTGCAACATGTGACTGGACAAATGCTGGTGATTACATTTTAGCTAACACCTGTACTGAAAGACTCAAGCT |       |       |       |       |       |       |       |       |  |  |
| Fig badnavirus 1 NC_017830.1            |         | (7141)                                                                              | ----- |       |       |       |       |       |       |       |  |  |
|                                         |         | Section 203                                                                         |       |       |       |       |       |       |       |       |  |  |
| SARS-CoV-2 Reference Genome NC_045512.2 | (16767) | 16767                                                                               | 16780 | 16790 | 16800 | 16810 | 16820 | 16830 |       | 16849 |  |  |
|                                         | (16632) | TTTTGCAGCAGAAACGCTCAAAGCTACTGAGGAGACATTTAAACTGTCTTATGGTATTGCTACTGTACGTGAAGTGCTGTCTG |       |       |       |       |       |       |       |       |  |  |
| Fig badnavirus 1 NC_017830.1            |         | (7141)                                                                              | ----- |       |       |       |       |       |       |       |  |  |

SARS-CoV-2 & Fig badnavirus 1.apr

|                                         |         |                                                                                     |       |       |       |       |       |       |       |       |  |  |
|-----------------------------------------|---------|-------------------------------------------------------------------------------------|-------|-------|-------|-------|-------|-------|-------|-------|--|--|
|                                         |         | Section 204                                                                         |       |       |       |       |       |       |       |       |  |  |
| SARS-CoV-2 Reference Genome NC_045512.2 | (16850) | 16850                                                                               | 16860 | 16870 | 16880 | 16890 | 16900 | 16910 | 16920 | 16932 |  |  |
|                                         | (16715) | ACAGAGAATTACATCTTTTCATGGGAAGTTGGTAAACCTAGACCACCCTTAACCGAAATTATGTCTTTACTGGTTATCGTGTA |       |       |       |       |       |       |       |       |  |  |
| Fig badnavirus 1 NC_017830.1            |         | (7141)                                                                              | ----- |       |       |       |       |       |       |       |  |  |
|                                         |         | Section 205                                                                         |       |       |       |       |       |       |       |       |  |  |
| SARS-CoV-2 Reference Genome NC_045512.2 | (16933) | 16933                                                                               | 16940 | 16950 | 16960 | 16970 | 16980 | 16990 | 17000 | 17015 |  |  |
|                                         | (16798) | ACTAAAAACAGTAAAGTACAAATAGGAGAGTACACCTTTGAAAAAGGTGACTATGGTGATGCTGTTGTTTACCGAGGTACAAC |       |       |       |       |       |       |       |       |  |  |
| Fig badnavirus 1 NC_017830.1            |         | (7141)                                                                              | ----- |       |       |       |       |       |       |       |  |  |
|                                         |         | Section 206                                                                         |       |       |       |       |       |       |       |       |  |  |
| SARS-CoV-2 Reference Genome NC_045512.2 | (17016) | 17016                                                                               | 17030 | 17040 | 17050 | 17060 | 17070 | 17080 | 17098 |       |  |  |
|                                         | (16881) | AACTTACAAATTAAATGTTGGTGATTATTTTGTGCTGACATCACATACAGTAATGCCATTAAGTGCACCTACACTAGTGCCAC |       |       |       |       |       |       |       |       |  |  |
| Fig badnavirus 1 NC_017830.1            |         | (7141)                                                                              | ----- |       |       |       |       |       |       |       |  |  |
|                                         |         | Section 207                                                                         |       |       |       |       |       |       |       |       |  |  |
| SARS-CoV-2 Reference Genome NC_045512.2 | (17099) | 17099                                                                               | 17110 | 17120 | 17130 | 17140 | 17150 | 17160 | 17170 | 17181 |  |  |
|                                         | (16964) | AAGAGCACTATGTTAGAATTACTGGCTTATACCCAACTCAATATCTCAGATGAGTTTTCTAGCAATGTTGCAAATTATCAA   |       |       |       |       |       |       |       |       |  |  |
| Fig badnavirus 1 NC_017830.1            |         | (7141)                                                                              | ----- |       |       |       |       |       |       |       |  |  |
|                                         |         | Section 208                                                                         |       |       |       |       |       |       |       |       |  |  |
| SARS-CoV-2 Reference Genome NC_045512.2 | (17182) | 17182                                                                               | 17190 | 17200 | 17210 | 17220 | 17230 | 17240 | 17250 | 17264 |  |  |
|                                         | (17047) | AAGGTTGGTATGCAAAAGTATTCTACACTCCAGGGACCACCTGGTACTGGTAAGAGTCATTTTGCTATTGGCCTAGCTCTCTA |       |       |       |       |       |       |       |       |  |  |
| Fig badnavirus 1 NC_017830.1            |         | (7141)                                                                              | ----- |       |       |       |       |       |       |       |  |  |
|                                         |         | Section 209                                                                         |       |       |       |       |       |       |       |       |  |  |
| SARS-CoV-2 Reference Genome NC_045512.2 | (17265) | 17265                                                                               | 17270 | 17280 | 17290 | 17300 | 17310 | 17320 | 17330 | 17347 |  |  |
|                                         | (17130) | CTACCCCTTCTGCTCGCATAGTGATACAGCTTGCTCTCATGCCGCTGTTGATGCACTATGTGAGAAGGCATTAAAATATTTGC |       |       |       |       |       |       |       |       |  |  |
| Fig badnavirus 1 NC_017830.1            |         | (7141)                                                                              | ----- |       |       |       |       |       |       |       |  |  |
|                                         |         | Section 210                                                                         |       |       |       |       |       |       |       |       |  |  |
| SARS-CoV-2 Reference Genome NC_045512.2 | (17348) | 17348                                                                               | 17360 | 17370 | 17380 | 17390 | 17400 | 17410 | 17420 | 17430 |  |  |
|                                         | (17213) | CTATAGATAAATGTAGTAGAATTATACCTGCACGTGCTCGTGTAGAGTGTTTTGATAAATTCAAAGTGAATTCAACATTAGAA |       |       |       |       |       |       |       |       |  |  |
| Fig badnavirus 1 NC_017830.1            |         | (7141)                                                                              | ----- |       |       |       |       |       |       |       |  |  |

## SARS-CoV-2 &amp; Fig badnavirus 1.apr

|                                         |         |                                                                                      |       |       |       |       |       |       |       |
|-----------------------------------------|---------|--------------------------------------------------------------------------------------|-------|-------|-------|-------|-------|-------|-------|
|                                         |         | Section 211                                                                          |       |       |       |       |       |       |       |
|                                         | (17431) | 17431                                                                                | 17440 | 17450 | 17460 | 17470 | 17480 | 17490 | 17500 |
| SARS-CoV-2 Reference Genome NC_045512.2 | (17296) | CAGTATGTCCTTTGTACTGTAAATGCATTGCCTGAGACGACAGCAGATATAGTTGTCTTTGATGAAATTTCAATGGCCACAAA  |       |       |       |       |       |       |       |
| Fig badnavirus 1 NC_017830.1            | (7141)  | -----                                                                                |       |       |       |       |       |       |       |
|                                         |         | Section 212                                                                          |       |       |       |       |       |       |       |
|                                         | (17514) | 17514                                                                                | 17520 | 17530 | 17540 | 17550 | 17560 | 17570 | 17580 |
| SARS-CoV-2 Reference Genome NC_045512.2 | (17379) | TTATGATTTGAGTGTGTCAATGCCAGATTACGTGCTAAGCACTATGTGTACATTGGCGACCCTGCTCAATTACCTGCACCAC   |       |       |       |       |       |       |       |
| Fig badnavirus 1 NC_017830.1            | (7141)  | -----                                                                                |       |       |       |       |       |       |       |
|                                         |         | Section 213                                                                          |       |       |       |       |       |       |       |
|                                         | (17597) | 17597                                                                                | 17610 | 17620 | 17630 | 17640 | 17650 | 17660 | 17679 |
| SARS-CoV-2 Reference Genome NC_045512.2 | (17462) | GCACATTGCTAACTAAGGGCACACTAGAACCAGAATATTTCAATTCAGTGTGTAGACTTATGAAAACCTATAGGTCCAGACATG |       |       |       |       |       |       |       |
| Fig badnavirus 1 NC_017830.1            | (7141)  | -----                                                                                |       |       |       |       |       |       |       |
|                                         |         | Section 214                                                                          |       |       |       |       |       |       |       |
|                                         | (17680) | 17680                                                                                | 17690 | 17700 | 17710 | 17720 | 17730 | 17740 | 17750 |
| SARS-CoV-2 Reference Genome NC_045512.2 | (17545) | TTCCTCGGAACCTTGTCGGCGTTGTCTGCTGAAATTGTTGACACTGTGAGTGCTTTGGTTTATGATAATAAGCTTAAAGCACA  |       |       |       |       |       |       |       |
| Fig badnavirus 1 NC_017830.1            | (7141)  | -----                                                                                |       |       |       |       |       |       |       |
|                                         |         | Section 215                                                                          |       |       |       |       |       |       |       |
|                                         | (17763) | 17763                                                                                | 17770 | 17780 | 17790 | 17800 | 17810 | 17820 | 17830 |
| SARS-CoV-2 Reference Genome NC_045512.2 | (17628) | TAAAGACAAATCAGCTCAATGCTTTAAATGTTTTATAAGGGTGTTATCACGCATGATGTTTCATCTGCAATTAACAGGCCAC   |       |       |       |       |       |       |       |
| Fig badnavirus 1 NC_017830.1            | (7141)  | -----                                                                                |       |       |       |       |       |       |       |
|                                         |         | Section 216                                                                          |       |       |       |       |       |       |       |
|                                         | (17846) | 17846                                                                                | 17860 | 17870 | 17880 | 17890 | 17900 | 17910 | 17928 |
| SARS-CoV-2 Reference Genome NC_045512.2 | (17711) | AAATAGGCGTGGTAAGAGAATTCCTTACACGTAACCTGCTTGGAGAAAAGCTGTCTTTATTTACCTTATAATTCACAGAAT    |       |       |       |       |       |       |       |
| Fig badnavirus 1 NC_017830.1            | (7141)  | -----                                                                                |       |       |       |       |       |       |       |
|                                         |         | Section 217                                                                          |       |       |       |       |       |       |       |
|                                         | (17929) | 17929                                                                                | 17940 | 17950 | 17960 | 17970 | 17980 | 17990 | 18000 |
| SARS-CoV-2 Reference Genome NC_045512.2 | (17794) | GCTGTAGCCTCAAAGATTTGGGACTACCAACTCAAAGCTGTTGATTTCATCACAGGGCTCAGAATATGACTATGTCATATTAC  |       |       |       |       |       |       |       |
| Fig badnavirus 1 NC_017830.1            | (7141)  | -----                                                                                |       |       |       |       |       |       |       |
|                                         |         | 18011                                                                                |       |       |       |       |       |       |       |

## SARS-CoV-2 &amp; Fig badnavirus 1.apr

|                                                                         |         |                                                                                       |       |       |       |       |       |       |       |
|-------------------------------------------------------------------------|---------|---------------------------------------------------------------------------------------|-------|-------|-------|-------|-------|-------|-------|
|                                                                         |         | Section 218                                                                           |       |       |       |       |       |       |       |
| SARS-CoV-2 Reference Genome NC_045512.2<br>Fig badnavirus 1 NC_017830.1 | (18012) | 18012                                                                                 | 18020 | 18030 | 18040 | 18050 | 18060 | 18070 | 18080 |
|                                                                         | (17877) | TCAAACCAC TGAAACAGCTCACTCTTGTAATGTAAACAGATTTAATGTTGCTATTACCAGAGCAAAAGTAGGCATACTTTGCA  |       |       |       |       |       |       |       |
|                                                                         |         | Section 219                                                                           |       |       |       |       |       |       |       |
| SARS-CoV-2 Reference Genome NC_045512.2<br>Fig badnavirus 1 NC_017830.1 | (18095) | 18095                                                                                 | 18100 | 18110 | 18120 | 18130 | 18140 | 18150 | 18160 |
|                                                                         | (17960) | TAATGTCTGATAGAGACCTTTATGACAAGTTGCAATTTACAAGTCTTGAAATTCCACGTAGGAATGTGGCAACTTTACAAGCT   |       |       |       |       |       |       |       |
|                                                                         |         | Section 220                                                                           |       |       |       |       |       |       |       |
| SARS-CoV-2 Reference Genome NC_045512.2<br>Fig badnavirus 1 NC_017830.1 | (18178) | 18178                                                                                 | 18190 | 18200 | 18210 | 18220 | 18230 | 18240 | 18250 |
|                                                                         | (18043) | GAAAATGTAACAGGACTCTTTAAAGATTGTAGTAAGGTAATCACTGGGTTACATCCTACACAGGCACCTACACACCTCAGTGT   |       |       |       |       |       |       |       |
|                                                                         |         | Section 221                                                                           |       |       |       |       |       |       |       |
| SARS-CoV-2 Reference Genome NC_045512.2<br>Fig badnavirus 1 NC_017830.1 | (18261) | 18261                                                                                 | 18270 | 18280 | 18290 | 18300 | 18310 | 18320 | 18330 |
|                                                                         | (18126) | TGACACTAAATTCAAACTGAAGGTTTATGTGTTGACATACCTGGCATAACCTAAGGACATGACCTATAGAAGACTCATCTCTA   |       |       |       |       |       |       |       |
|                                                                         |         | Section 222                                                                           |       |       |       |       |       |       |       |
| SARS-CoV-2 Reference Genome NC_045512.2<br>Fig badnavirus 1 NC_017830.1 | (18344) | 18344                                                                                 | 18350 | 18360 | 18370 | 18380 | 18390 | 18400 | 18410 |
|                                                                         | (18209) | TGATGGGTTTTTAAAAATGAATTATCAAGTTAATGGTTACCCTAACATGTTTATCACCCGCGAAGAAGCTATAAGACATGTACGT |       |       |       |       |       |       |       |
|                                                                         |         | Section 223                                                                           |       |       |       |       |       |       |       |
| SARS-CoV-2 Reference Genome NC_045512.2<br>Fig badnavirus 1 NC_017830.1 | (18427) | 18427                                                                                 | 18440 | 18450 | 18460 | 18470 | 18480 | 18490 | 18509 |
|                                                                         | (18292) | GCATGGATTGGCTTCGATGTCGAGGGGTGTCATGCTACTAGAGAAGCTGTTGGTACCAATTTACCTTTACAGCTAGGTTTTTC   |       |       |       |       |       |       |       |
|                                                                         |         | Section 224                                                                           |       |       |       |       |       |       |       |
| SARS-CoV-2 Reference Genome NC_045512.2<br>Fig badnavirus 1 NC_017830.1 | (18510) | 18510                                                                                 | 18520 | 18530 | 18540 | 18550 | 18560 | 18570 | 18580 |
|                                                                         | (18375) | TACAGGTGTTAACCTAGTTGCTGTACCTACAGGTTATGTTGATACACCTAATAATACAGATTTTTCCAGAGTTAGTGCTAAAC   |       |       |       |       |       |       |       |



## SARS-CoV-2 &amp; Fig badnavirus 1.apr

|                                         |         |                                                                                      |       |       |       |       |       |       |       |       |       |
|-----------------------------------------|---------|--------------------------------------------------------------------------------------|-------|-------|-------|-------|-------|-------|-------|-------|-------|
|                                         |         | Section 225                                                                          |       |       |       |       |       |       |       |       |       |
|                                         |         | (18593)                                                                              | 18593 | 18600 | 18610 | 18620 | 18630 | 18640 | 18650 | 18660 | 18675 |
| SARS-CoV-2 Reference Genome NC_045512.2 | (18458) | CACC GCCTGGAGATCAATTTAAACACCTCATACCACTTATGTACAAAGGACTTCCTTGGAATGTAGTGCGTATAAAGATTGTA |       |       |       |       |       |       |       |       |       |
| Fig badnavirus 1 NC_017830.1            | (7141)  | -----                                                                                |       |       |       |       |       |       |       |       |       |
|                                         |         | Section 226                                                                          |       |       |       |       |       |       |       |       |       |
|                                         |         | (18676)                                                                              | 18676 | 18690 | 18700 | 18710 | 18720 | 18730 | 18740 |       | 18758 |
| SARS-CoV-2 Reference Genome NC_045512.2 | (18541) | CAAATGTTAAGTGACACACTTAAAAATCTCTCTGACAGAGTCGTATTTGTCTTATGGGCACATGGCTTTGAGTTGACATCTAT  |       |       |       |       |       |       |       |       |       |
| Fig badnavirus 1 NC_017830.1            | (7141)  | -----                                                                                |       |       |       |       |       |       |       |       |       |
|                                         |         | Section 227                                                                          |       |       |       |       |       |       |       |       |       |
|                                         |         | (18759)                                                                              | 18759 | 18770 | 18780 | 18790 | 18800 | 18810 | 18820 | 18830 | 18841 |
| SARS-CoV-2 Reference Genome NC_045512.2 | (18624) | GAAGTATTTTGTGAAAAATAGGACCTGAGCGCACCTGTTGTCTATGTGATAGACGTGCCACATGCTTTTCCACTGCTTCAGACA |       |       |       |       |       |       |       |       |       |
| Fig badnavirus 1 NC_017830.1            | (7141)  | -----                                                                                |       |       |       |       |       |       |       |       |       |
|                                         |         | Section 228                                                                          |       |       |       |       |       |       |       |       |       |
|                                         |         | (18842)                                                                              | 18842 | 18850 | 18860 | 18870 | 18880 | 18890 | 18900 | 18910 | 18924 |
| SARS-CoV-2 Reference Genome NC_045512.2 | (18707) | CTTATGCCTGTTGGCATCATTTCTATTGGATTTGATTACGTCTATAATCCGTTTATGATTGATGTTCAACAATGGGGTTTTACA |       |       |       |       |       |       |       |       |       |
| Fig badnavirus 1 NC_017830.1            | (7141)  | -----                                                                                |       |       |       |       |       |       |       |       |       |
|                                         |         | Section 229                                                                          |       |       |       |       |       |       |       |       |       |
|                                         |         | (18925)                                                                              | 18925 | 18930 | 18940 | 18950 | 18960 | 18970 | 18980 | 18990 | 19007 |
| SARS-CoV-2 Reference Genome NC_045512.2 | (18790) | GGTAACCTACAAAGCAACCATGATCTGTATTGTCAAGTCCATGGTAATGCACATGTAGCTAGTTGTGATGCAATCATGACTAG  |       |       |       |       |       |       |       |       |       |
| Fig badnavirus 1 NC_017830.1            | (7141)  | -----                                                                                |       |       |       |       |       |       |       |       |       |
|                                         |         | Section 230                                                                          |       |       |       |       |       |       |       |       |       |
|                                         |         | (19008)                                                                              | 19008 | 19020 | 19030 | 19040 | 19050 | 19060 | 19070 | 19080 | 19090 |
| SARS-CoV-2 Reference Genome NC_045512.2 | (18873) | GTGTC TAGCTGTCCACGAGTGCTTTGTTAAGCGTGTTGACTGGACTATTGAATATCCTATAATTGGTGATGAACTGAAGATTA |       |       |       |       |       |       |       |       |       |
| Fig badnavirus 1 NC_017830.1            | (7141)  | -----                                                                                |       |       |       |       |       |       |       |       |       |
|                                         |         | Section 231                                                                          |       |       |       |       |       |       |       |       |       |
|                                         |         | (19091)                                                                              | 19091 | 19100 | 19110 | 19120 | 19130 | 19140 | 19150 | 19160 | 19173 |
| SARS-CoV-2 Reference Genome NC_045512.2 | (18956) | ATGCGGCTTG TAGAAAGGTTCAACACATGGTTGTTAAAGCTGCATTATTAGCAGACAAATCCCAGTTCTTCACGACATTGGT  |       |       |       |       |       |       |       |       |       |
| Fig badnavirus 1 NC_017830.1            | (7141)  | -----                                                                                |       |       |       |       |       |       |       |       |       |

SARS-CoV-2 & Fig badnavirus 1.apr

|                                         |         |                                                                                        |       |       |       |       |       |       |       |
|-----------------------------------------|---------|----------------------------------------------------------------------------------------|-------|-------|-------|-------|-------|-------|-------|
|                                         |         | Section 232                                                                            |       |       |       |       |       |       |       |
|                                         | (19174) | 19174                                                                                  | 19180 | 19190 | 19200 | 19210 | 19220 | 19230 | 19240 |
| SARS-CoV-2 Reference Genome NC_045512.2 | (19039) | AACCCCTAAAGCTATTAAAGTGTGTACCTCAAGCTGATGTAGAATGGAAGTTCTATGATGCACAGCCTTGTTAGTGACAAAGCTTA |       |       |       |       |       |       |       |
| Fig badnavirus 1 NC_017830.1            | (7141)  | -----                                                                                  |       |       |       |       |       |       |       |
|                                         |         | Section 233                                                                            |       |       |       |       |       |       |       |
|                                         | (19257) | 19257                                                                                  | 19270 | 19280 | 19290 | 19300 | 19310 | 19320 | 19339 |
| SARS-CoV-2 Reference Genome NC_045512.2 | (19177) | TAAAATAGAAGAATTATTCTATTCTTATGCCACACATTCTGACAAATTCACAGATGGTGTATGCCTATTTTGAATTGCAATG     |       |       |       |       |       |       |       |
| Fig badnavirus 1 NC_017830.1            | (7141)  | -----                                                                                  |       |       |       |       |       |       |       |
|                                         |         | Section 234                                                                            |       |       |       |       |       |       |       |
|                                         | (19340) | 19340                                                                                  | 19350 | 19360 | 19370 | 19380 | 19390 | 19400 | 19410 |
| SARS-CoV-2 Reference Genome NC_045512.2 | (19205) | TCGATAGATATCCTGCTAATTCCATTGTTTGTAGATTTGACACTAGAGTGCTATCTAACCTTAACTTGCCTGGTTGTGATGGT    |       |       |       |       |       |       |       |
| Fig badnavirus 1 NC_017830.1            | (7141)  | -----                                                                                  |       |       |       |       |       |       |       |
|                                         |         | Section 235                                                                            |       |       |       |       |       |       |       |
|                                         | (19423) | 19423                                                                                  | 19430 | 19440 | 19450 | 19460 | 19470 | 19480 | 19490 |
| SARS-CoV-2 Reference Genome NC_045512.2 | (19288) | GGCAGTTTGTATGTAAATAAACATGCATTCCACACACCAGCTTTTGATAAAAGTGCTTTTGTTAATTTAAAACAATTACCATT    |       |       |       |       |       |       |       |
| Fig badnavirus 1 NC_017830.1            | (7141)  | -----                                                                                  |       |       |       |       |       |       |       |
|                                         |         | Section 236                                                                            |       |       |       |       |       |       |       |
|                                         | (19506) | 19506                                                                                  | 19520 | 19530 | 19540 | 19550 | 19560 | 19570 | 19588 |
| SARS-CoV-2 Reference Genome NC_045512.2 | (19371) | TTTCTATTACTCTGACAGTCCATGTGAGTCTCATGGAAAACAAGTAGTGTGATATAGATTATGTACCACTAAAGTCTGCTA      |       |       |       |       |       |       |       |
| Fig badnavirus 1 NC_017830.1            | (7141)  | -----                                                                                  |       |       |       |       |       |       |       |
|                                         |         | Section 237                                                                            |       |       |       |       |       |       |       |
|                                         | (19589) | 19589                                                                                  | 19600 | 19610 | 19620 | 19630 | 19640 | 19650 | 19660 |
| SARS-CoV-2 Reference Genome NC_045512.2 | (19454) | CGTGTATAACACGTTGCAATTTAGGTGGTGTCTGTCTGTAGACATCATGCTAATGAGTACAGATTGTATCTCGATGCTTATAAC   |       |       |       |       |       |       |       |
| Fig badnavirus 1 NC_017830.1            | (7141)  | -----                                                                                  |       |       |       |       |       |       |       |
|                                         |         | Section 238                                                                            |       |       |       |       |       |       |       |
|                                         | (19672) | 19672                                                                                  | 19680 | 19690 | 19700 | 19710 | 19720 | 19730 | 19740 |
| SARS-CoV-2 Reference Genome NC_045512.2 | (19537) | ATGATGATCTCAGCTGGCTTTAGCTTGTGGGTTTACAAACAATTTGATACTTATAACCTCTGGAACACTTTTACAAGACTTCA    |       |       |       |       |       |       |       |
| Fig badnavirus 1 NC_017830.1            | (7141)  | -----                                                                                  |       |       |       |       |       |       |       |

SARS-CoV-2 & Fig badnavirus 1.apr

[illegible]

## SARS-CoV-2 &amp; Fig badnavirus 1.apr

|                                                                         |         |                                                                                      |                       |                       |                       |                       |                       |                       |                       |                       |
|-------------------------------------------------------------------------|---------|--------------------------------------------------------------------------------------|-----------------------|-----------------------|-----------------------|-----------------------|-----------------------|-----------------------|-----------------------|-----------------------|
|                                                                         |         |                                                                                      |                       |                       |                       |                       |                       |                       |                       | Section 246           |
| SARS-CoV-2 Reference Genome NC_045512.2<br>Fig badnavirus 1 NC_017830.1 | (20336) | <a href="#">20336</a>                                                                | <a href="#">20350</a> | <a href="#">20360</a> | <a href="#">20370</a> | <a href="#">20380</a> | <a href="#">20390</a> | <a href="#">20400</a> | <a href="#">20418</a> |                       |
|                                                                         | (20201) | TTACTCAGAGTAGAAATTTACAAGAATTTAAACCCAGGAGTCAAATGGAAATTGATTTCTTAGAATTAGCTATGGATGAATTC  |                       |                       |                       |                       |                       |                       |                       |                       |
|                                                                         | (7141)  | -----                                                                                |                       |                       |                       |                       |                       |                       |                       |                       |
|                                                                         |         |                                                                                      |                       |                       |                       |                       |                       |                       |                       | Section 247           |
| SARS-CoV-2 Reference Genome NC_045512.2<br>Fig badnavirus 1 NC_017830.1 | (20419) | <a href="#">20419</a>                                                                | <a href="#">20430</a> | <a href="#">20440</a> | <a href="#">20450</a> | <a href="#">20460</a> | <a href="#">20470</a> | <a href="#">20480</a> | <a href="#">20490</a> | <a href="#">20501</a> |
|                                                                         | (20284) | ATTGAACGGTATAAATTAGAAGGCTATGCCTTCGAACATATCGTTTATGGAGATTTTAGTCATAGTCAGTTAGGTGGTTTACA  |                       |                       |                       |                       |                       |                       |                       |                       |
|                                                                         | (7141)  | -----                                                                                |                       |                       |                       |                       |                       |                       |                       |                       |
|                                                                         |         |                                                                                      |                       |                       |                       |                       |                       |                       |                       | Section 248           |
| SARS-CoV-2 Reference Genome NC_045512.2<br>Fig badnavirus 1 NC_017830.1 | (20502) | <a href="#">20502</a>                                                                | <a href="#">20510</a> | <a href="#">20520</a> | <a href="#">20530</a> | <a href="#">20540</a> | <a href="#">20550</a> | <a href="#">20560</a> | <a href="#">20570</a> | <a href="#">20584</a> |
|                                                                         | (20367) | TCTACTGATTGGACTAGCTAAACGTTTTAAGGAATCACCTTTTGAATTAGAAGATTTTATTCCTATGGACAGTACAGTTAAAA  |                       |                       |                       |                       |                       |                       |                       |                       |
|                                                                         | (7141)  | -----                                                                                |                       |                       |                       |                       |                       |                       |                       |                       |
|                                                                         |         |                                                                                      |                       |                       |                       |                       |                       |                       |                       | Section 249           |
| SARS-CoV-2 Reference Genome NC_045512.2<br>Fig badnavirus 1 NC_017830.1 | (20585) | <a href="#">20585</a>                                                                | <a href="#">20590</a> | <a href="#">20600</a> | <a href="#">20610</a> | <a href="#">20620</a> | <a href="#">20630</a> | <a href="#">20640</a> | <a href="#">20650</a> | <a href="#">20667</a> |
|                                                                         | (20450) | ACTATTTTCATAACAGATGCGCAAACAGGTTTCATCTAAGTGTGTGTGTTCTGTTATTGATTTATTACTTGATGATTTTGTGAA |                       |                       |                       |                       |                       |                       |                       |                       |
|                                                                         | (7141)  | -----                                                                                |                       |                       |                       |                       |                       |                       |                       |                       |
|                                                                         |         |                                                                                      |                       |                       |                       |                       |                       |                       |                       | Section 250           |
| SARS-CoV-2 Reference Genome NC_045512.2<br>Fig badnavirus 1 NC_017830.1 | (20668) | <a href="#">20668</a>                                                                | <a href="#">20680</a> | <a href="#">20690</a> | <a href="#">20700</a> | <a href="#">20710</a> | <a href="#">20720</a> | <a href="#">20730</a> | <a href="#">20740</a> | <a href="#">20750</a> |
|                                                                         | (20533) | ATAATAAAATCCCAAGATTTATCTGTAGTTTCTAAGGTTGTCAAAGTGACTATTGACTATACAGAAATTTCAATTTATGCTTTG |                       |                       |                       |                       |                       |                       |                       |                       |
|                                                                         | (7141)  | -----                                                                                |                       |                       |                       |                       |                       |                       |                       |                       |
|                                                                         |         |                                                                                      |                       |                       |                       |                       |                       |                       |                       | Section 251           |
| SARS-CoV-2 Reference Genome NC_045512.2<br>Fig badnavirus 1 NC_017830.1 | (20751) | <a href="#">20751</a>                                                                | <a href="#">20760</a> | <a href="#">20770</a> | <a href="#">20780</a> | <a href="#">20790</a> | <a href="#">20800</a> | <a href="#">20810</a> | <a href="#">20820</a> | <a href="#">20833</a> |
|                                                                         | (20616) | GTGTAAAGATGGCCATGTAGAAACATTTTACCCAAAATTACAATCTAGTCAAGCGTGGCAACCGGGTGTTGCTATGCCTAATC  |                       |                       |                       |                       |                       |                       |                       |                       |
|                                                                         | (7141)  | -----                                                                                |                       |                       |                       |                       |                       |                       |                       |                       |
|                                                                         |         |                                                                                      |                       |                       |                       |                       |                       |                       |                       | Section 252           |
| SARS-CoV-2 Reference Genome NC_045512.2<br>Fig badnavirus 1 NC_017830.1 | (20834) | <a href="#">20834</a>                                                                | <a href="#">20840</a> | <a href="#">20850</a> | <a href="#">20860</a> | <a href="#">20870</a> | <a href="#">20880</a> | <a href="#">20890</a> | <a href="#">20900</a> | <a href="#">20916</a> |
|                                                                         | (20699) | TTTACAAAATGCAAAGAATGCTATTAGAAAAGTGTGACCTTCAAAATTATGGTGATAGTGCAACATTACCTAAAGGCATAATG  |                       |                       |                       |                       |                       |                       |                       |                       |
|                                                                         | (7141)  | -----                                                                                |                       |                       |                       |                       |                       |                       |                       |                       |

## SARS-CoV-2 &amp; Fig badnavirus 1.apr

|                                                                         |         |                                                                                      |                       |                       |                       |                       |                       |                       |                       |                       |
|-------------------------------------------------------------------------|---------|--------------------------------------------------------------------------------------|-----------------------|-----------------------|-----------------------|-----------------------|-----------------------|-----------------------|-----------------------|-----------------------|
|                                                                         |         | Section 253                                                                          |                       |                       |                       |                       |                       |                       |                       |                       |
| SARS-CoV-2 Reference Genome NC_045512.2<br>Fig badnavirus 1 NC_017830.1 | (20917) | <a href="#">20917</a>                                                                | <a href="#">20930</a> | <a href="#">20940</a> | <a href="#">20950</a> | <a href="#">20960</a> | <a href="#">20970</a> | <a href="#">20980</a> | <a href="#">20999</a> |                       |
|                                                                         | (20782) | ATGAATGTCGCAAAATATACTCAACTGTGTCAATATTTAAACACATTAAACATTAGCTGTACCCTATAATATGAGAGTTATACA |                       |                       |                       |                       |                       |                       |                       |                       |
|                                                                         |         | (7141)                                                                               | -----                 |                       |                       |                       |                       |                       |                       |                       |
|                                                                         |         | Section 254                                                                          |                       |                       |                       |                       |                       |                       |                       |                       |
| SARS-CoV-2 Reference Genome NC_045512.2<br>Fig badnavirus 1 NC_017830.1 | (21000) | <a href="#">21000</a>                                                                | <a href="#">21010</a> | <a href="#">21020</a> | <a href="#">21030</a> | <a href="#">21040</a> | <a href="#">21050</a> | <a href="#">21060</a> | <a href="#">21070</a> | <a href="#">21082</a> |
|                                                                         | (20865) | TTTTGGTGCTGGTTCTGATAAAGGAGTTGCACCAGGTACAGCTGTTTTAAGACAGTGGTTGCCTACGGGTACGCTGCTTGCTCG |                       |                       |                       |                       |                       |                       |                       |                       |
|                                                                         |         | (7141)                                                                               | -----                 |                       |                       |                       |                       |                       |                       |                       |
|                                                                         |         | Section 255                                                                          |                       |                       |                       |                       |                       |                       |                       |                       |
| SARS-CoV-2 Reference Genome NC_045512.2<br>Fig badnavirus 1 NC_017830.1 | (21083) | <a href="#">21083</a>                                                                | <a href="#">21090</a> | <a href="#">21100</a> | <a href="#">21110</a> | <a href="#">21120</a> | <a href="#">21130</a> | <a href="#">21140</a> | <a href="#">21150</a> | <a href="#">21165</a> |
|                                                                         | (20948) | ATTCAGATCTTAATGACTTTGTCTCTGATGCAGATTCAACTTTGATTGGTGATTGTGCAACTGTACATACAGCTAATAAATGG  |                       |                       |                       |                       |                       |                       |                       |                       |
|                                                                         |         | (7141)                                                                               | -----                 |                       |                       |                       |                       |                       |                       |                       |
|                                                                         |         | Section 256                                                                          |                       |                       |                       |                       |                       |                       |                       |                       |
| SARS-CoV-2 Reference Genome NC_045512.2<br>Fig badnavirus 1 NC_017830.1 | (21166) | <a href="#">21166</a>                                                                | <a href="#">21180</a> | <a href="#">21190</a> | <a href="#">21200</a> | <a href="#">21210</a> | <a href="#">21220</a> | <a href="#">21230</a> | <a href="#">21248</a> |                       |
|                                                                         | (21031) | GATCTCATTATTAGTGATATGTACGACCCTAAGACTAAAAATGTTACAAAAGAAAATGACTCTAAAGAGGGTTTTTTCACCTTA |                       |                       |                       |                       |                       |                       |                       |                       |
|                                                                         |         | (7141)                                                                               | -----                 |                       |                       |                       |                       |                       |                       |                       |
|                                                                         |         | Section 257                                                                          |                       |                       |                       |                       |                       |                       |                       |                       |
| SARS-CoV-2 Reference Genome NC_045512.2<br>Fig badnavirus 1 NC_017830.1 | (21249) | <a href="#">21249</a>                                                                | <a href="#">21260</a> | <a href="#">21270</a> | <a href="#">21280</a> | <a href="#">21290</a> | <a href="#">21300</a> | <a href="#">21310</a> | <a href="#">21320</a> | <a href="#">21331</a> |
|                                                                         | (21114) | CATTTGTGGGTTTATACAACAAAAGCTAGCTCTTGGAGGTTCCGTGGCTATAAAGATAACAGAACATTCTTGGAATGCTGATC  |                       |                       |                       |                       |                       |                       |                       |                       |
|                                                                         |         | (7141)                                                                               | -----                 |                       |                       |                       |                       |                       |                       |                       |
|                                                                         |         | Section 258                                                                          |                       |                       |                       |                       |                       |                       |                       |                       |
| SARS-CoV-2 Reference Genome NC_045512.2<br>Fig badnavirus 1 NC_017830.1 | (21332) | <a href="#">21332</a>                                                                | <a href="#">21340</a> | <a href="#">21350</a> | <a href="#">21360</a> | <a href="#">21370</a> | <a href="#">21380</a> | <a href="#">21390</a> | <a href="#">21400</a> | <a href="#">21414</a> |
|                                                                         | (21197) | TTTATAAGCTCATGGGACACTTCGCATGGTGGACAGCCTTTGTTACTAATGTGAATGCGTCATCATCTGAAGCATTTTTTAATT |                       |                       |                       |                       |                       |                       |                       |                       |
|                                                                         |         | (7141)                                                                               | -----                 |                       |                       |                       |                       |                       |                       |                       |
|                                                                         |         | Section 259                                                                          |                       |                       |                       |                       |                       |                       |                       |                       |
| SARS-CoV-2 Reference Genome NC_045512.2<br>Fig badnavirus 1 NC_017830.1 | (21415) | <a href="#">21415</a>                                                                | <a href="#">21420</a> | <a href="#">21430</a> | <a href="#">21440</a> | <a href="#">21450</a> | <a href="#">21460</a> | <a href="#">21470</a> | <a href="#">21480</a> | <a href="#">21497</a> |
|                                                                         | (21280) | GGATGTAATTATCTTGGCAAACACGCGAACAATAGATGGTTATGTCATGCATGCAAATTACATATTTTGGAGGAATACAAA    |                       |                       |                       |                       |                       |                       |                       |                       |
|                                                                         |         | (7141)                                                                               | -----                 |                       |                       |                       |                       |                       |                       |                       |

SARS-CoV-2 & Fig badnavirus 1.apr

|                                                                         |         |                                                                                      |       |       |       |       |       |       |             |
|-------------------------------------------------------------------------|---------|--------------------------------------------------------------------------------------|-------|-------|-------|-------|-------|-------|-------------|
| Section 260                                                             |         |                                                                                      |       |       |       |       |       |       |             |
| SARS-CoV-2 Reference Genome NC_045512.2<br>Fig badnavirus 1 NC_017830.1 | (21498) | 21498                                                                                | 21510 | 21520 | 21530 | 21540 | 21550 | 21560 | 21570 21580 |
|                                                                         | (21363) | TCCAATTCAGTTGTCTTCTTCTTATTTGACATGAGTAAATTTCCCTTAAATTAAGGGGTACTGCTGTTATGTCTTTAA       |       |       |       |       |       |       |             |
|                                                                         | (7141)  | -----                                                                                |       |       |       |       |       |       |             |
| Section 261                                                             |         |                                                                                      |       |       |       |       |       |       |             |
| SARS-CoV-2 Reference Genome NC_045512.2<br>Fig badnavirus 1 NC_017830.1 | (21581) | 21581                                                                                | 21590 | 21600 | 21610 | 21620 | 21630 | 21640 | 21650 21663 |
|                                                                         | (21446) | AAGAAGGTCAAATCAATGATATGATTTTATCTCTTCTTAGTAAAGGTAGACTTATAATTAGAGAAAACAACAGAGTTGTTATT  |       |       |       |       |       |       |             |
|                                                                         | (7141)  | -----                                                                                |       |       |       |       |       |       |             |
| Section 262                                                             |         |                                                                                      |       |       |       |       |       |       |             |
| SARS-CoV-2 Reference Genome NC_045512.2<br>Fig badnavirus 1 NC_017830.1 | (21664) | 21664                                                                                | 21670 | 21680 | 21690 | 21700 | 21710 | 21720 | 21730 21746 |
|                                                                         | (21529) | TCTAGTGATGTTCTTGTTAAACAATAAACGAACAATGTTTGTCTTTCTTGTTTTATTGCCACTAGTCTCTAGTCAGTGTGTTA  |       |       |       |       |       |       |             |
|                                                                         | (7141)  | -----                                                                                |       |       |       |       |       |       |             |
| Section 263                                                             |         |                                                                                      |       |       |       |       |       |       |             |
| SARS-CoV-2 Reference Genome NC_045512.2<br>Fig badnavirus 1 NC_017830.1 | (21747) | 21747                                                                                | 21760 | 21770 | 21780 | 21790 | 21800 | 21810 | 21829       |
|                                                                         | (21612) | ATCTTACAACCAGAACTCAATTACCCCTGCATACACTAATTCTTTCACACGTGGTGTTTATTACCCTGACAAAGTTTTTCAGA  |       |       |       |       |       |       |             |
|                                                                         | (7141)  | -----                                                                                |       |       |       |       |       |       |             |
| Section 264                                                             |         |                                                                                      |       |       |       |       |       |       |             |
| SARS-CoV-2 Reference Genome NC_045512.2<br>Fig badnavirus 1 NC_017830.1 | (21830) | 21830                                                                                | 21840 | 21850 | 21860 | 21870 | 21880 | 21890 | 21900 21912 |
|                                                                         | (21695) | TCCTCAGTTTTACATTCAACTCAGGACTTGTTCTTACCTTTCTTTTCCAATGTTACTTGTTCCATGCTATACATGTCTCTGG   |       |       |       |       |       |       |             |
|                                                                         | (7141)  | -----                                                                                |       |       |       |       |       |       |             |
| Section 265                                                             |         |                                                                                      |       |       |       |       |       |       |             |
| SARS-CoV-2 Reference Genome NC_045512.2<br>Fig badnavirus 1 NC_017830.1 | (21913) | 21913                                                                                | 21920 | 21930 | 21940 | 21950 | 21960 | 21970 | 21980 21995 |
|                                                                         | (21778) | GACCAATGGTACTAAGAGGTTTGATAACCCTGTCTTACCATTTAATGATGGTGTTTATTTTGCTTCCACTGAGAAGTCTAACA  |       |       |       |       |       |       |             |
|                                                                         | (7141)  | -----                                                                                |       |       |       |       |       |       |             |
| Section 266                                                             |         |                                                                                      |       |       |       |       |       |       |             |
| SARS-CoV-2 Reference Genome NC_045512.2<br>Fig badnavirus 1 NC_017830.1 | (21996) | 21996                                                                                | 22010 | 22020 | 22030 | 22040 | 22050 | 22060 | 22078       |
|                                                                         | (21861) | TAATAAGAGGCTGGATTTTTGGTACTACTTTAGATTCTGAAGACCCAGTCCCTACTTATTGTTAATAACGCTACTAATGTTGTT |       |       |       |       |       |       |             |
|                                                                         | (7141)  | -----                                                                                |       |       |       |       |       |       |             |

## SARS-CoV-2 &amp; Fig badnavirus 1.apr

|                                                                         |         |                                                                                      |                       |                       |                       |                       |                       |                       |                       |                       |
|-------------------------------------------------------------------------|---------|--------------------------------------------------------------------------------------|-----------------------|-----------------------|-----------------------|-----------------------|-----------------------|-----------------------|-----------------------|-----------------------|
|                                                                         |         |                                                                                      |                       |                       |                       |                       |                       |                       |                       | Section 267           |
| SARS-CoV-2 Reference Genome NC_045512.2<br>Fig badnavirus 1 NC_017830.1 | (22079) | <a href="#">22079</a>                                                                | <a href="#">22090</a> | <a href="#">22100</a> | <a href="#">22110</a> | <a href="#">22120</a> | <a href="#">22130</a> | <a href="#">22140</a> | <a href="#">22150</a> | <a href="#">22161</a> |
|                                                                         | (21944) | ATTAAAGTCTGTGAATTTCAATTTTGTAATGATCCATTTTGGGTGTTTATTACCACAAAAACAACAAAAGTTGGATGGAAAG   |                       |                       |                       |                       |                       |                       |                       |                       |
|                                                                         |         |                                                                                      |                       |                       |                       |                       |                       |                       |                       | Section 268           |
| SARS-CoV-2 Reference Genome NC_045512.2<br>Fig badnavirus 1 NC_017830.1 | (22162) | <a href="#">22162</a>                                                                | <a href="#">22170</a> | <a href="#">22180</a> | <a href="#">22190</a> | <a href="#">22200</a> | <a href="#">22210</a> | <a href="#">22220</a> | <a href="#">22230</a> | <a href="#">22244</a> |
|                                                                         | (22077) | TGAGTTCAGAGTTTATTCTAGTGCGAATAATTGCACCTTTGAATATGTCTCTCAGCCTTTTCTTATGGACCTTGAAGGAAAAC  |                       |                       |                       |                       |                       |                       |                       |                       |
|                                                                         |         |                                                                                      |                       |                       |                       |                       |                       |                       |                       | Section 269           |
| SARS-CoV-2 Reference Genome NC_045512.2<br>Fig badnavirus 1 NC_017830.1 | (22245) | <a href="#">22245</a>                                                                | <a href="#">22250</a> | <a href="#">22260</a> | <a href="#">22270</a> | <a href="#">22280</a> | <a href="#">22290</a> | <a href="#">22300</a> | <a href="#">22310</a> | <a href="#">22327</a> |
|                                                                         | (22110) | AGGGTAATTTCAAAAATCTTAGGGAATTTGTGTTTAAAGAATATTGATGGTTATTTTAAATATATTCTAAGCACACGCCTATT  |                       |                       |                       |                       |                       |                       |                       |                       |
|                                                                         |         |                                                                                      |                       |                       |                       |                       |                       |                       |                       | Section 270           |
| SARS-CoV-2 Reference Genome NC_045512.2<br>Fig badnavirus 1 NC_017830.1 | (22328) | <a href="#">22328</a>                                                                | <a href="#">22340</a> | <a href="#">22350</a> | <a href="#">22360</a> | <a href="#">22370</a> | <a href="#">22380</a> | <a href="#">22390</a> | <a href="#">22400</a> | <a href="#">22410</a> |
|                                                                         | (22193) | AATTTAGTGCGTGATCTCCCTCAGGGTTTTTCGGCTTTAGAACCATTGGTAGATTTGCCAATAGGTATTAACATCACTAGGTT  |                       |                       |                       |                       |                       |                       |                       |                       |
|                                                                         |         |                                                                                      |                       |                       |                       |                       |                       |                       |                       | Section 271           |
| SARS-CoV-2 Reference Genome NC_045512.2<br>Fig badnavirus 1 NC_017830.1 | (22411) | <a href="#">22411</a>                                                                | <a href="#">22420</a> | <a href="#">22430</a> | <a href="#">22440</a> | <a href="#">22450</a> | <a href="#">22460</a> | <a href="#">22470</a> | <a href="#">22480</a> | <a href="#">22493</a> |
|                                                                         | (22276) | TCAAACCTTTACTTGCTTTACATAGAAGTTATTTGACTCCTGGTGATTCTTCTTCAGGTTGGACAGCTGGTGCTGCAGCTTATT |                       |                       |                       |                       |                       |                       |                       |                       |
|                                                                         |         |                                                                                      |                       |                       |                       |                       |                       |                       |                       | Section 272           |
| SARS-CoV-2 Reference Genome NC_045512.2<br>Fig badnavirus 1 NC_017830.1 | (22494) | <a href="#">22494</a>                                                                | <a href="#">22500</a> | <a href="#">22510</a> | <a href="#">22520</a> | <a href="#">22530</a> | <a href="#">22540</a> | <a href="#">22550</a> | <a href="#">22560</a> | <a href="#">22576</a> |
|                                                                         | (22359) | ATGTGGGTTATCTTCAACCTAGGACTTTTCTATTAAAATATAATGAAAATGGAACCATTACAGATGCTGTAGACTGTGCACTT  |                       |                       |                       |                       |                       |                       |                       |                       |
|                                                                         |         |                                                                                      |                       |                       |                       |                       |                       |                       |                       | Section 273           |
| SARS-CoV-2 Reference Genome NC_045512.2<br>Fig badnavirus 1 NC_017830.1 | (22577) | <a href="#">22577</a>                                                                | <a href="#">22590</a> | <a href="#">22600</a> | <a href="#">22610</a> | <a href="#">22620</a> | <a href="#">22630</a> | <a href="#">22640</a> |                       | <a href="#">22659</a> |
|                                                                         | (22447) | GACCCCTCTCTCAGAAACAAAGTGACGTTGAAATCCTTCACTGTAGAAAAAGGAATCTATCAAACCTTCTAACTTTAGAGTCCA |                       |                       |                       |                       |                       |                       |                       |                       |

SARS-CoV-2 & Fig badnavirus 1.apr

|                                                                         |         |                                                                                       |                       |                       |                       |                       |                       |                       |                       |                       |
|-------------------------------------------------------------------------|---------|---------------------------------------------------------------------------------------|-----------------------|-----------------------|-----------------------|-----------------------|-----------------------|-----------------------|-----------------------|-----------------------|
| Section 274                                                             |         |                                                                                       |                       |                       |                       |                       |                       |                       |                       |                       |
| SARS-CoV-2 Reference Genome NC_045512.2<br>Fig badnavirus 1 NC_017830.1 | (22660) | <a href="#">22660</a>                                                                 | <a href="#">22670</a> | <a href="#">22680</a> | <a href="#">22690</a> | <a href="#">22700</a> | <a href="#">22710</a> | <a href="#">22720</a> | <a href="#">22730</a> | <a href="#">22742</a> |
|                                                                         | (22525) | ACCAACAGAAATCTATTGTTAGATTTCCCTAATATTACAAACTTGTGCCCTTTTGGTGAAGTTTTTAACGCCACCAGATTTGCAT |                       |                       |                       |                       |                       |                       |                       |                       |
| -----                                                                   |         |                                                                                       |                       |                       |                       |                       |                       |                       |                       |                       |
| Section 275                                                             |         |                                                                                       |                       |                       |                       |                       |                       |                       |                       |                       |
| SARS-CoV-2 Reference Genome NC_045512.2<br>Fig badnavirus 1 NC_017830.1 | (22743) | <a href="#">22743</a>                                                                 | <a href="#">22750</a> | <a href="#">22760</a> | <a href="#">22770</a> | <a href="#">22780</a> | <a href="#">22790</a> | <a href="#">22800</a> | <a href="#">22810</a> | <a href="#">22825</a> |
|                                                                         | (22608) | CTGTTTATGCTTGGAACAGGAAGAGAATCAGCAACTGTGTTGCTGATTATTCTGTCTATATAATTCCGCATCATTTCCTCACT   |                       |                       |                       |                       |                       |                       |                       |                       |
| -----                                                                   |         |                                                                                       |                       |                       |                       |                       |                       |                       |                       |                       |
| Section 276                                                             |         |                                                                                       |                       |                       |                       |                       |                       |                       |                       |                       |
| SARS-CoV-2 Reference Genome NC_045512.2<br>Fig badnavirus 1 NC_017830.1 | (22826) | <a href="#">22826</a>                                                                 | <a href="#">22840</a> | <a href="#">22850</a> | <a href="#">22860</a> | <a href="#">22870</a> | <a href="#">22880</a> | <a href="#">22890</a> |                       | <a href="#">22908</a> |
|                                                                         | (22691) | TTTAAGTGTTATGGAGTGCTCCTACTAAATTAATGATCTCTGCTTTACTAATGTCTATGCAGATTCATTTGTAATTAGAGG     |                       |                       |                       |                       |                       |                       |                       |                       |
| -----                                                                   |         |                                                                                       |                       |                       |                       |                       |                       |                       |                       |                       |
| Section 277                                                             |         |                                                                                       |                       |                       |                       |                       |                       |                       |                       |                       |
| SARS-CoV-2 Reference Genome NC_045512.2<br>Fig badnavirus 1 NC_017830.1 | (22909) | <a href="#">22909</a>                                                                 | <a href="#">22920</a> | <a href="#">22930</a> | <a href="#">22940</a> | <a href="#">22950</a> | <a href="#">22960</a> | <a href="#">22970</a> | <a href="#">22980</a> | <a href="#">22991</a> |
|                                                                         | (22774) | TGATGAAGTCAGACAAATCGCTCCAGGGCAAACCTGGAAAGATTGCTGATTATAATTATAAATTACCAGATGATTTTACAGGCT  |                       |                       |                       |                       |                       |                       |                       |                       |
| -----                                                                   |         |                                                                                       |                       |                       |                       |                       |                       |                       |                       |                       |
| Section 278                                                             |         |                                                                                       |                       |                       |                       |                       |                       |                       |                       |                       |
| SARS-CoV-2 Reference Genome NC_045512.2<br>Fig badnavirus 1 NC_017830.1 | (22992) | <a href="#">22992</a>                                                                 | <a href="#">23000</a> | <a href="#">23010</a> | <a href="#">23020</a> | <a href="#">23030</a> | <a href="#">23040</a> | <a href="#">23050</a> | <a href="#">23060</a> | <a href="#">23074</a> |
|                                                                         | (22857) | GCGTTATAGCTTGGAATTCTAACAATCTTGATTCTAAGGTTGGTGGTAATTATAATTACCTGTATAGATTGTTTAGGAAGTCT   |                       |                       |                       |                       |                       |                       |                       |                       |
| -----                                                                   |         |                                                                                       |                       |                       |                       |                       |                       |                       |                       |                       |
| Section 279                                                             |         |                                                                                       |                       |                       |                       |                       |                       |                       |                       |                       |
| SARS-CoV-2 Reference Genome NC_045512.2<br>Fig badnavirus 1 NC_017830.1 | (23075) | <a href="#">23075</a>                                                                 | <a href="#">23080</a> | <a href="#">23090</a> | <a href="#">23100</a> | <a href="#">23110</a> | <a href="#">23120</a> | <a href="#">23130</a> | <a href="#">23140</a> | <a href="#">23157</a> |
|                                                                         | (22940) | AATCTCAAACCTTTTGAGAGAGATATTTCAACTGAAATCTATCAGGCCGGTAGCACACCTTGTAATGGTGTGGAAGGTTTTAA   |                       |                       |                       |                       |                       |                       |                       |                       |
| -----                                                                   |         |                                                                                       |                       |                       |                       |                       |                       |                       |                       |                       |
| Section 280                                                             |         |                                                                                       |                       |                       |                       |                       |                       |                       |                       |                       |
| SARS-CoV-2 Reference Genome NC_045512.2<br>Fig badnavirus 1 NC_017830.1 | (23158) | <a href="#">23158</a>                                                                 | <a href="#">23170</a> | <a href="#">23180</a> | <a href="#">23190</a> | <a href="#">23200</a> | <a href="#">23210</a> | <a href="#">23220</a> | <a href="#">23230</a> | <a href="#">23240</a> |
|                                                                         | (23023) | TTGTTACTTTTCTTTACAATCATATGGTTTCCAACCCACTAATGGTGTGTTGGTTACCAACCATACAGAGTAGTAGTACTTTCTT |                       |                       |                       |                       |                       |                       |                       |                       |
| -----                                                                   |         |                                                                                       |                       |                       |                       |                       |                       |                       |                       |                       |



## SARS-CoV-2 &amp; Fig badnavirus 1.apr

|                                                                         |         |                                                                                       |                       |                       |                       |                       |                       |                       |                       |                       |  |
|-------------------------------------------------------------------------|---------|---------------------------------------------------------------------------------------|-----------------------|-----------------------|-----------------------|-----------------------|-----------------------|-----------------------|-----------------------|-----------------------|--|
|                                                                         |         | Section 281                                                                           |                       |                       |                       |                       |                       |                       |                       |                       |  |
| SARS-CoV-2 Reference Genome NC_045512.2<br>Fig badnavirus 1 NC_017830.1 | (23241) | <a href="#">23241</a>                                                                 | <a href="#">23250</a> | <a href="#">23260</a> | <a href="#">23270</a> | <a href="#">23280</a> | <a href="#">23290</a> | <a href="#">23300</a> | <a href="#">23310</a> | <a href="#">23323</a> |  |
|                                                                         | (23106) | TTGAACTTCTACATGCACCAGCAACTGTTTGTGGACCTAAAAAGTCTACTAATTTGGTTAAAAACAAATGTGTCAATTTCAAC   |                       |                       |                       |                       |                       |                       |                       |                       |  |
|                                                                         |         | (7141)                                                                                | -----                 |                       |                       |                       |                       |                       |                       |                       |  |
|                                                                         |         | Section 282                                                                           |                       |                       |                       |                       |                       |                       |                       |                       |  |
| SARS-CoV-2 Reference Genome NC_045512.2<br>Fig badnavirus 1 NC_017830.1 | (23324) | <a href="#">23324</a>                                                                 | <a href="#">23330</a> | <a href="#">23340</a> | <a href="#">23350</a> | <a href="#">23360</a> | <a href="#">23370</a> | <a href="#">23380</a> | <a href="#">23390</a> | <a href="#">23406</a> |  |
|                                                                         | (23189) | TTCAATGGTTTAAACAGGCACAGGTGTTCTTACTGAGTCTAACAAAAAGTTTCTGCCTTTCCAACAATTTGGCAGAGACATTGC  |                       |                       |                       |                       |                       |                       |                       |                       |  |
|                                                                         |         | (7141)                                                                                | -----                 |                       |                       |                       |                       |                       |                       |                       |  |
|                                                                         |         | Section 283                                                                           |                       |                       |                       |                       |                       |                       |                       |                       |  |
| SARS-CoV-2 Reference Genome NC_045512.2<br>Fig badnavirus 1 NC_017830.1 | (23407) | <a href="#">23407</a>                                                                 | <a href="#">23420</a> | <a href="#">23430</a> | <a href="#">23440</a> | <a href="#">23450</a> | <a href="#">23460</a> | <a href="#">23470</a> | <a href="#">23489</a> |                       |  |
|                                                                         | (23272) | TGACACTACTGATGCTGTCCGTGATCCACAGACACTTGAGATTCTTGACATTACACCATGTTCTTTTGGTGGTGTCTAGTGTTA  |                       |                       |                       |                       |                       |                       |                       |                       |  |
|                                                                         |         | (7141)                                                                                | -----                 |                       |                       |                       |                       |                       |                       |                       |  |
|                                                                         |         | Section 284                                                                           |                       |                       |                       |                       |                       |                       |                       |                       |  |
| SARS-CoV-2 Reference Genome NC_045512.2<br>Fig badnavirus 1 NC_017830.1 | (23490) | <a href="#">23490</a>                                                                 | <a href="#">23500</a> | <a href="#">23510</a> | <a href="#">23520</a> | <a href="#">23530</a> | <a href="#">23540</a> | <a href="#">23550</a> | <a href="#">23560</a> | <a href="#">23572</a> |  |
|                                                                         | (23355) | TAACACCAGGAACAAATACTTCTAACCCAGGTTGCTGTTCTTTATCAGGATGTTAACTGCACAGAAGTCCCTGTTGCTATTTCAT |                       |                       |                       |                       |                       |                       |                       |                       |  |
|                                                                         |         | (7141)                                                                                | -----                 |                       |                       |                       |                       |                       |                       |                       |  |
|                                                                         |         | Section 285                                                                           |                       |                       |                       |                       |                       |                       |                       |                       |  |
| SARS-CoV-2 Reference Genome NC_045512.2<br>Fig badnavirus 1 NC_017830.1 | (23573) | <a href="#">23573</a>                                                                 | <a href="#">23580</a> | <a href="#">23590</a> | <a href="#">23600</a> | <a href="#">23610</a> | <a href="#">23620</a> | <a href="#">23630</a> | <a href="#">23640</a> | <a href="#">23655</a> |  |
|                                                                         | (23438) | GCAGATCAACTTACTCCTACTTGGCGTGTTTATTCTACAGGTTCTAATGTTTTTCAAACACGTGCAGGCTGTTTAATAGGGGC   |                       |                       |                       |                       |                       |                       |                       |                       |  |
|                                                                         |         | (7141)                                                                                | -----                 |                       |                       |                       |                       |                       |                       |                       |  |
|                                                                         |         | Section 286                                                                           |                       |                       |                       |                       |                       |                       |                       |                       |  |
| SARS-CoV-2 Reference Genome NC_045512.2<br>Fig badnavirus 1 NC_017830.1 | (23656) | <a href="#">23656</a>                                                                 | <a href="#">23670</a> | <a href="#">23680</a> | <a href="#">23690</a> | <a href="#">23700</a> | <a href="#">23710</a> | <a href="#">23720</a> | <a href="#">23738</a> |                       |  |
|                                                                         | (23521) | TGAACATGTCAACAACTCATATGAGTGTGACATACCCATTGGTGCAGGTATATGCGCTAGTTATCAGACTCAGACTAATTCTC   |                       |                       |                       |                       |                       |                       |                       |                       |  |
|                                                                         |         | (7141)                                                                                | -----                 |                       |                       |                       |                       |                       |                       |                       |  |
|                                                                         |         | Section 287                                                                           |                       |                       |                       |                       |                       |                       |                       |                       |  |
| SARS-CoV-2 Reference Genome NC_045512.2<br>Fig badnavirus 1 NC_017830.1 | (23739) | <a href="#">23739</a>                                                                 | <a href="#">23750</a> | <a href="#">23760</a> | <a href="#">23770</a> | <a href="#">23780</a> | <a href="#">23790</a> | <a href="#">23800</a> | <a href="#">23810</a> | <a href="#">23821</a> |  |
|                                                                         | (23604) | CTCGGCGGGGCACGTAGTGTAGCTAGTCAATCCATCATTGCCTACACTATGTCACTTGGTGCAGAAAATTCAGTTGCTTACTCT  |                       |                       |                       |                       |                       |                       |                       |                       |  |
|                                                                         |         | (7141)                                                                                | -----                 |                       |                       |                       |                       |                       |                       |                       |  |

## SARS-CoV-2 &amp; Fig badnavirus 1.apr

|                                                                         |         |                                                                                     |       |       |       |       |       |       |       |
|-------------------------------------------------------------------------|---------|-------------------------------------------------------------------------------------|-------|-------|-------|-------|-------|-------|-------|
|                                                                         |         | Section 288                                                                         |       |       |       |       |       |       |       |
| SARS-CoV-2 Reference Genome NC_045512.2<br>Fig badnavirus 1 NC_017830.1 | (23822) | 23822                                                                               | 23830 | 23840 | 23850 | 23860 | 23870 | 23880 | 23890 |
|                                                                         | (23687) | AATAACTCTATTGCCATACCCACAAATTTTACTATTAGTGTTACCACAGAAATTCTACCAGTGTCTATGACCAAGACATCAGT |       |       |       |       |       |       |       |
|                                                                         |         | Section 289                                                                         |       |       |       |       |       |       |       |
| SARS-CoV-2 Reference Genome NC_045512.2<br>Fig badnavirus 1 NC_017830.1 | (23905) | 23905                                                                               | 23910 | 23920 | 23930 | 23940 | 23950 | 23960 | 23970 |
|                                                                         | (23770) | AGATTGTACAATGTACATTTGTGGTGATTCAACTGAATGCAGCAATCTTTTGTGCAATATGGCAGTTTTTGTACACAATTAA  |       |       |       |       |       |       |       |
|                                                                         |         | Section 290                                                                         |       |       |       |       |       |       |       |
| SARS-CoV-2 Reference Genome NC_045512.2<br>Fig badnavirus 1 NC_017830.1 | (23988) | 23988                                                                               | 24000 | 24010 | 24020 | 24030 | 24040 | 24050 | 24060 |
|                                                                         | (23853) | ACCGTGCTTTAACTGGAATAGCTGTTGAACAAGACAAAAACACCCAAGAAGTTTTTGCACAAGTCAAACAAATTTACAAAACA |       |       |       |       |       |       |       |
|                                                                         |         | Section 291                                                                         |       |       |       |       |       |       |       |
| SARS-CoV-2 Reference Genome NC_045512.2<br>Fig badnavirus 1 NC_017830.1 | (24071) | 24071                                                                               | 24080 | 24090 | 24100 | 24110 | 24120 | 24130 | 24140 |
|                                                                         | (23936) | CCACCAATTAAAGATTTTGGTGGTTTTAATTTTTTCACAAATATTACCAGATCCATCAAACCAAGCAAGAGGTCATTTATTGA |       |       |       |       |       |       |       |
|                                                                         |         | Section 292                                                                         |       |       |       |       |       |       |       |
| SARS-CoV-2 Reference Genome NC_045512.2<br>Fig badnavirus 1 NC_017830.1 | (24154) | 24154                                                                               | 24160 | 24170 | 24180 | 24190 | 24200 | 24210 | 24220 |
|                                                                         | (24019) | AGATCTACTTTTCAACAAAGTGACACTTGCAGATGCTGGCTTCATCAAACAATATGGTGATTGCCTTGGTGATATTGCTGCTA |       |       |       |       |       |       |       |
|                                                                         |         | Section 293                                                                         |       |       |       |       |       |       |       |
| SARS-CoV-2 Reference Genome NC_045512.2<br>Fig badnavirus 1 NC_017830.1 | (24237) | 24237                                                                               | 24250 | 24260 | 24270 | 24280 | 24290 | 24300 | 24319 |
|                                                                         | (24102) | GAGACCTCATTTGTGCACAAAAGTTTAACGGCCTTACTGTTTTGCCACCTTTGCTCACAGATGAAATGATTGCTCAATACACT |       |       |       |       |       |       |       |
|                                                                         |         | Section 294                                                                         |       |       |       |       |       |       |       |
| SARS-CoV-2 Reference Genome NC_045512.2<br>Fig badnavirus 1 NC_017830.1 | (24320) | 24320                                                                               | 24330 | 24340 | 24350 | 24360 | 24370 | 24380 | 24390 |
|                                                                         | (24185) | TCTGCACTGTTAGCGGGTACAATCACTTCTGGTTGGACCTTTGGTGCAGGTGCTGCATTACAAATACCATTGCTATGCAAAAT |       |       |       |       |       |       |       |
|                                                                         | (7141)  |                                                                                     |       |       |       |       |       |       |       |

## SARS-CoV-2 &amp; Fig badnavirus 1.apr

|                                         |         |                                                                                       |                       |                       |                       |                       |                       |                       |                       |
|-----------------------------------------|---------|---------------------------------------------------------------------------------------|-----------------------|-----------------------|-----------------------|-----------------------|-----------------------|-----------------------|-----------------------|
|                                         |         | Section 295                                                                           |                       |                       |                       |                       |                       |                       |                       |
|                                         | (24403) | <a href="#">24403</a>                                                                 | <a href="#">24410</a> | <a href="#">24420</a> | <a href="#">24430</a> | <a href="#">24440</a> | <a href="#">24450</a> | <a href="#">24460</a> | <a href="#">24470</a> |
| SARS-CoV-2 Reference Genome NC_045512.2 | (24268) | GGCTTATAGGTTTAAATGGTATTGGAGTTACACAGAATGTTCTCTATGAGAACCACAAAATTGATTGCCAACCAATTTAATAGTG |                       |                       |                       |                       |                       |                       |                       |
| Fig badnavirus 1 NC_017830.1            | (7141)  | -----                                                                                 |                       |                       |                       |                       |                       |                       |                       |
|                                         |         | Section 296                                                                           |                       |                       |                       |                       |                       |                       |                       |
|                                         | (24486) | <a href="#">24486</a>                                                                 | <a href="#">24500</a> | <a href="#">24510</a> | <a href="#">24520</a> | <a href="#">24530</a> | <a href="#">24540</a> | <a href="#">24550</a> | <a href="#">24568</a> |
| SARS-CoV-2 Reference Genome NC_045512.2 | (24351) | CTATTGGCAAAATTCAGACTCACTTTCTTCCACAGCAAGTGCACCTTGGAAAACCTCAAGATGTGGTCAACCAAAATGCACAA   |                       |                       |                       |                       |                       |                       |                       |
| Fig badnavirus 1 NC_017830.1            | (7141)  | -----                                                                                 |                       |                       |                       |                       |                       |                       |                       |
|                                         |         | Section 297                                                                           |                       |                       |                       |                       |                       |                       |                       |
|                                         | (24569) | <a href="#">24569</a>                                                                 | <a href="#">24580</a> | <a href="#">24590</a> | <a href="#">24600</a> | <a href="#">24610</a> | <a href="#">24620</a> | <a href="#">24630</a> | <a href="#">24640</a> |
| SARS-CoV-2 Reference Genome NC_045512.2 | (24434) | GCTTTAAACACGCTTGTTAAACAACCTTAGCTCCAATTTTGGTGCAATTTCAAGTGTTTTAAATGATATCCTTTACGTCCTTGA  |                       |                       |                       |                       |                       |                       |                       |
| Fig badnavirus 1 NC_017830.1            | (7141)  | -----                                                                                 |                       |                       |                       |                       |                       |                       |                       |
|                                         |         | Section 298                                                                           |                       |                       |                       |                       |                       |                       |                       |
|                                         | (24652) | <a href="#">24652</a>                                                                 | <a href="#">24660</a> | <a href="#">24670</a> | <a href="#">24680</a> | <a href="#">24690</a> | <a href="#">24700</a> | <a href="#">24710</a> | <a href="#">24720</a> |
| SARS-CoV-2 Reference Genome NC_045512.2 | (24517) | CAAAGTTGAGGCTGAAGTGCAAATTGATAGGTTGATCACAGGCAGACTTCAAAGTTTGCAGACATATGTGACTCAACAATTAA   |                       |                       |                       |                       |                       |                       |                       |
| Fig badnavirus 1 NC_017830.1            | (7141)  | -----                                                                                 |                       |                       |                       |                       |                       |                       |                       |
|                                         |         | Section 299                                                                           |                       |                       |                       |                       |                       |                       |                       |
|                                         | (24735) | <a href="#">24735</a>                                                                 | <a href="#">24740</a> | <a href="#">24750</a> | <a href="#">24760</a> | <a href="#">24770</a> | <a href="#">24780</a> | <a href="#">24790</a> | <a href="#">24800</a> |
| SARS-CoV-2 Reference Genome NC_045512.2 | (24600) | TTAGAGCTGCAGAAATCAGAGCTTCTGCTAATCTTGCTGCTACTAAAATGTCAGAGTGTTGACTTGGACAATCAAAAAGAGTT   |                       |                       |                       |                       |                       |                       |                       |
| Fig badnavirus 1 NC_017830.1            | (7141)  | -----                                                                                 |                       |                       |                       |                       |                       |                       |                       |
|                                         |         | Section 300                                                                           |                       |                       |                       |                       |                       |                       |                       |
|                                         | (24818) | <a href="#">24818</a>                                                                 | <a href="#">24830</a> | <a href="#">24840</a> | <a href="#">24850</a> | <a href="#">24860</a> | <a href="#">24870</a> | <a href="#">24880</a> | <a href="#">24890</a> |
| SARS-CoV-2 Reference Genome NC_045512.2 | (24683) | GATTTTTGTGGAAAGGGCTATCATCTTATGTCTTCCCTCAGTCAGCACCTCATGGTGTAGTCTTCTTGCATGTGACTTATGT    |                       |                       |                       |                       |                       |                       |                       |
| Fig badnavirus 1 NC_017830.1            | (7141)  | -----                                                                                 |                       |                       |                       |                       |                       |                       |                       |
|                                         |         | Section 301                                                                           |                       |                       |                       |                       |                       |                       |                       |
|                                         | (24901) | <a href="#">24901</a>                                                                 | <a href="#">24910</a> | <a href="#">24920</a> | <a href="#">24930</a> | <a href="#">24940</a> | <a href="#">24950</a> | <a href="#">24960</a> | <a href="#">24970</a> |
| SARS-CoV-2 Reference Genome NC_045512.2 | (24766) | CCCTGCACAAGAAAAGAACTTCACAACCTGCTCCTGCCATTTGTCTATGATGGAAAAGCACACTTTCCTCGTGAAGGTGTCTTTG |                       |                       |                       |                       |                       |                       |                       |
| Fig badnavirus 1 NC_017830.1            | (7141)  | -----                                                                                 |                       |                       |                       |                       |                       |                       |                       |

## SARS-CoV-2 &amp; Fig badnavirus 1.apr

|                                         |         |                                                                                      |       |       |       |       |       |       |       |             |
|-----------------------------------------|---------|--------------------------------------------------------------------------------------|-------|-------|-------|-------|-------|-------|-------|-------------|
|                                         |         |                                                                                      |       |       |       |       |       |       |       | Section 302 |
|                                         |         |                                                                                      |       |       |       |       |       |       |       |             |
|                                         |         |                                                                                      |       |       |       |       |       |       |       |             |
| SARS-CoV-2 Reference Genome NC_045512.2 | (24984) | 24984                                                                                | 24990 | 25000 | 25010 | 25020 | 25030 | 25040 | 25050 | 25066       |
| Fig badnavirus 1 NC_017830.1            | (7141)  | TTTCAAATGGCACACACTGGTTTGTAACACAAAGGAATTTTATGAACCACAAATCATTACTACAGACAACACATTTGTGTCT   |       |       |       |       |       |       |       |             |
|                                         |         |                                                                                      |       |       |       |       |       |       |       |             |
|                                         |         |                                                                                      |       |       |       |       |       |       |       | Section 303 |
|                                         |         |                                                                                      |       |       |       |       |       |       |       |             |
| SARS-CoV-2 Reference Genome NC_045512.2 | (25067) | 25067                                                                                | 25080 | 25090 | 25100 | 25110 | 25120 | 25130 | 25149 |             |
| Fig badnavirus 1 NC_017830.1            | (7141)  | GGTAACTGTGATGTTGTAATAGGAATTGTCAACAACACAGTTTATGATCCTTTGCAACCTGAATTAGACTCATTCAAGGAGGA  |       |       |       |       |       |       |       |             |
|                                         |         |                                                                                      |       |       |       |       |       |       |       |             |
|                                         |         |                                                                                      |       |       |       |       |       |       |       | Section 304 |
|                                         |         |                                                                                      |       |       |       |       |       |       |       |             |
| SARS-CoV-2 Reference Genome NC_045512.2 | (25150) | 25150                                                                                | 25160 | 25170 | 25180 | 25190 | 25200 | 25210 | 25220 | 25232       |
| Fig badnavirus 1 NC_017830.1            | (7141)  | GTTAGATAAAATATTTAAGAATCATACATCACCAGATGTTGATTTAGGTGACATCTCTGGCATTAAATGCTTCAGTTGTAAACA |       |       |       |       |       |       |       |             |
|                                         |         |                                                                                      |       |       |       |       |       |       |       |             |
|                                         |         |                                                                                      |       |       |       |       |       |       |       | Section 305 |
|                                         |         |                                                                                      |       |       |       |       |       |       |       |             |
| SARS-CoV-2 Reference Genome NC_045512.2 | (25233) | 25233                                                                                | 25240 | 25250 | 25260 | 25270 | 25280 | 25290 | 25300 | 25315       |
| Fig badnavirus 1 NC_017830.1            | (7141)  | TTCAAAAAGAAATTGACCGCCTCAATGAGGTTGCCAAGAATTTAAATGAATCTCTCATCGATCTCCAAGAACTTGGAAAGTAT  |       |       |       |       |       |       |       |             |
|                                         |         |                                                                                      |       |       |       |       |       |       |       |             |
|                                         |         |                                                                                      |       |       |       |       |       |       |       | Section 306 |
|                                         |         |                                                                                      |       |       |       |       |       |       |       |             |
| SARS-CoV-2 Reference Genome NC_045512.2 | (25316) | 25316                                                                                | 25330 | 25340 | 25350 | 25360 | 25370 | 25380 | 25398 |             |
| Fig badnavirus 1 NC_017830.1            | (7141)  | GAGCAGTATATAAAATGGCCATGGTACATTTGGCTAGGTTTTATAGCTGGCTTGATTGCCATAGTAATGGTGACAATTATGCT  |       |       |       |       |       |       |       |             |
|                                         |         |                                                                                      |       |       |       |       |       |       |       |             |
|                                         |         |                                                                                      |       |       |       |       |       |       |       | Section 307 |
|                                         |         |                                                                                      |       |       |       |       |       |       |       |             |
| SARS-CoV-2 Reference Genome NC_045512.2 | (25399) | 25399                                                                                | 25410 | 25420 | 25430 | 25440 | 25450 | 25460 | 25470 | 25481       |
| Fig badnavirus 1 NC_017830.1            | (7141)  | TTGCTGTATGACCAGTTGCTGTAGTTGTCTCAAGGGCTGTTGTTCTTGTGGATCCTGCTGCAAATTTGATGAAGACGACTCTG  |       |       |       |       |       |       |       |             |
|                                         |         |                                                                                      |       |       |       |       |       |       |       |             |
|                                         |         |                                                                                      |       |       |       |       |       |       |       | Section 308 |
|                                         |         |                                                                                      |       |       |       |       |       |       |       |             |
| SARS-CoV-2 Reference Genome NC_045512.2 | (25482) | 25482                                                                                | 25490 | 25500 | 25510 | 25520 | 25530 | 25540 | 25550 | 25564       |
| Fig badnavirus 1 NC_017830.1            | (7141)  | AGCCAGTGCTCAAAGGAGTCAAATTACATTACATAAACGAACCTTATGGATTTGTTTATGAGAATCTTCACAATTGGAACCTG  |       |       |       |       |       |       |       |             |

## SARS-CoV-2 &amp; Fig badnavirus 1.apr

|                                                                         |         |                                                                                      |       |       |       |       |       |       |       |
|-------------------------------------------------------------------------|---------|--------------------------------------------------------------------------------------|-------|-------|-------|-------|-------|-------|-------|
|                                                                         |         | Section 309                                                                          |       |       |       |       |       |       |       |
| SARS-CoV-2 Reference Genome NC_045512.2<br>Fig badnavirus 1 NC_017830.1 | (25565) | 25565                                                                                | 25570 | 25580 | 25590 | 25600 | 25610 | 25620 | 25630 |
|                                                                         | (25430) | TAACTTTGAAGCAAGGTGAAATCAAGGATGCTACTCCTTCAGATTTTGTTCGCGCTACTGCAACGATACCGATACAAGCCTCA  |       |       |       |       |       |       |       |
|                                                                         |         | Section 310                                                                          |       |       |       |       |       |       |       |
| SARS-CoV-2 Reference Genome NC_045512.2<br>Fig badnavirus 1 NC_017830.1 | (25648) | 25648                                                                                | 25660 | 25670 | 25680 | 25690 | 25700 | 25710 | 25720 |
|                                                                         | (25513) | CTCCCTTTTCGGATGGCTTATTGTTGGCGTTGCACTTCTTGCTGTTTTTCAGAGCGCTTCCAAAATCATAACCCTCAAAAAGAG |       |       |       |       |       |       |       |
|                                                                         |         | Section 311                                                                          |       |       |       |       |       |       |       |
| SARS-CoV-2 Reference Genome NC_045512.2<br>Fig badnavirus 1 NC_017830.1 | (25731) | 25731                                                                                | 25740 | 25750 | 25760 | 25770 | 25780 | 25790 | 25800 |
|                                                                         | (25596) | ATGGCAACTAGCACTCTCCAAGGGTGTTCACTTTGTTTGCAACTTGCTGTTGTTGTTGTAAACAGTTTACTCACACCTTTTGC  |       |       |       |       |       |       |       |
|                                                                         |         | Section 312                                                                          |       |       |       |       |       |       |       |
| SARS-CoV-2 Reference Genome NC_045512.2<br>Fig badnavirus 1 NC_017830.1 | (25814) | 25814                                                                                | 25820 | 25830 | 25840 | 25850 | 25860 | 25870 | 25880 |
|                                                                         | (25679) | TCGTTGCTGCTGGCCTTGAAGCCCTTTTCTCTATCTTTATGCTTTAGTCTACTTCTTGCAGAGTATAAACTTTGTAAGAATA   |       |       |       |       |       |       |       |
|                                                                         |         | Section 313                                                                          |       |       |       |       |       |       |       |
| SARS-CoV-2 Reference Genome NC_045512.2<br>Fig badnavirus 1 NC_017830.1 | (25897) | 25897                                                                                | 25910 | 25920 | 25930 | 25940 | 25950 | 25960 | 25979 |
|                                                                         | (25762) | ATAATGAGGCTTTGGCTTTGCTGGAAATGCCGTTCCAAAAACCCATTACTTTATGATGCCAACTATTTTCTTTGCTGGCATAAC |       |       |       |       |       |       |       |
|                                                                         |         | Section 314                                                                          |       |       |       |       |       |       |       |
| SARS-CoV-2 Reference Genome NC_045512.2<br>Fig badnavirus 1 NC_017830.1 | (25980) | 25980                                                                                | 25990 | 26000 | 26010 | 26020 | 26030 | 26040 | 26050 |
|                                                                         | (25845) | TAATTGTTACGACTATTGTATACCTTACAATAGTGTAACCTTCTTCAATTGTCATTACTTCAGGTGATGGCACAACAAGTCCTA |       |       |       |       |       |       |       |
|                                                                         |         | Section 315                                                                          |       |       |       |       |       |       |       |
| SARS-CoV-2 Reference Genome NC_045512.2<br>Fig badnavirus 1 NC_017830.1 | (26063) | 26063                                                                                | 26070 | 26080 | 26090 | 26100 | 26110 | 26120 | 26130 |
|                                                                         | (25928) | TTTCTGAACATGACTACCAGATTGGTGGTTATACTGAAAAATGGGAATCTGGAGTAAAAGACTGTGTTGTATTACACAGTTAC  |       |       |       |       |       |       |       |

## SARS-CoV-2 &amp; Fig badnavirus 1.apr

|                                                                         |         |                                                                                        |                       |                       |                       |                       |                       |                       |                       |                       |
|-------------------------------------------------------------------------|---------|----------------------------------------------------------------------------------------|-----------------------|-----------------------|-----------------------|-----------------------|-----------------------|-----------------------|-----------------------|-----------------------|
|                                                                         |         | Section 316                                                                            |                       |                       |                       |                       |                       |                       |                       |                       |
| SARS-CoV-2 Reference Genome NC_045512.2<br>Fig badnavirus 1 NC_017830.1 | (26146) | <a href="#">26146</a>                                                                  | <a href="#">26160</a> | <a href="#">26170</a> | <a href="#">26180</a> | <a href="#">26190</a> | <a href="#">26200</a> | <a href="#">26210</a> | <a href="#">26228</a> |                       |
|                                                                         | (26011) | TTCAC TTCAGACTATTACCAGCTGTACTCAACTCAATTGAGTACAGACACTGGTGTGAACATGTTACCTTCTTCATCTACAA    |                       |                       |                       |                       |                       |                       |                       |                       |
|                                                                         |         | (7141)                                                                                 | -----                 |                       |                       |                       |                       |                       |                       |                       |
|                                                                         |         | Section 317                                                                            |                       |                       |                       |                       |                       |                       |                       |                       |
| SARS-CoV-2 Reference Genome NC_045512.2<br>Fig badnavirus 1 NC_017830.1 | (26229) | <a href="#">26229</a>                                                                  | <a href="#">26240</a> | <a href="#">26250</a> | <a href="#">26260</a> | <a href="#">26270</a> | <a href="#">26280</a> | <a href="#">26290</a> | <a href="#">26300</a> | <a href="#">26311</a> |
|                                                                         | (26094) | TAAAATTGTTGATGAGCCTGAAGAACATGTCCAAATTCACACAATCGACGGTTCATCCGGAGTTGTTAATCCAGTAATGGAAC    |                       |                       |                       |                       |                       |                       |                       |                       |
|                                                                         |         | (7141)                                                                                 | -----                 |                       |                       |                       |                       |                       |                       |                       |
|                                                                         |         | Section 318                                                                            |                       |                       |                       |                       |                       |                       |                       |                       |
| SARS-CoV-2 Reference Genome NC_045512.2<br>Fig badnavirus 1 NC_017830.1 | (26312) | <a href="#">26312</a>                                                                  | <a href="#">26320</a> | <a href="#">26330</a> | <a href="#">26340</a> | <a href="#">26350</a> | <a href="#">26360</a> | <a href="#">26370</a> | <a href="#">26380</a> | <a href="#">26394</a> |
|                                                                         | (26177) | CAATTTATGATGAACCGACGACGACTACTAGCGTGCCTTTGTAAGCACAAAGCTGATGAGTACGAACCTTATGTACTCATTTCGTT |                       |                       |                       |                       |                       |                       |                       |                       |
|                                                                         |         | (7141)                                                                                 | -----                 |                       |                       |                       |                       |                       |                       |                       |
|                                                                         |         | Section 319                                                                            |                       |                       |                       |                       |                       |                       |                       |                       |
| SARS-CoV-2 Reference Genome NC_045512.2<br>Fig badnavirus 1 NC_017830.1 | (26395) | <a href="#">26395</a>                                                                  | <a href="#">26400</a> | <a href="#">26410</a> | <a href="#">26420</a> | <a href="#">26430</a> | <a href="#">26440</a> | <a href="#">26450</a> | <a href="#">26460</a> | <a href="#">26477</a> |
|                                                                         | (26260) | TCGGAAGAGACAGGTACGTTAATAGTTAATAGCGTACTTCTTTTTCTTGCTTTCGTGGTATTCTTGCTAGTTACACTAGCCAT    |                       |                       |                       |                       |                       |                       |                       |                       |
|                                                                         |         | (7141)                                                                                 | -----                 |                       |                       |                       |                       |                       |                       |                       |
|                                                                         |         | Section 320                                                                            |                       |                       |                       |                       |                       |                       |                       |                       |
| SARS-CoV-2 Reference Genome NC_045512.2<br>Fig badnavirus 1 NC_017830.1 | (26478) | <a href="#">26478</a>                                                                  | <a href="#">26490</a> | <a href="#">26500</a> | <a href="#">26510</a> | <a href="#">26520</a> | <a href="#">26530</a> | <a href="#">26540</a> | <a href="#">26550</a> | <a href="#">26560</a> |
|                                                                         | (26343) | CCTTACTGCGCTTCGATTGTGTGCGTACTGCTGCAATATTGTTAACGTGAGTCTTGTAACCTTCTTTTTACGTTTACTCTC      |                       |                       |                       |                       |                       |                       |                       |                       |
|                                                                         |         | (7141)                                                                                 | -----                 |                       |                       |                       |                       |                       |                       |                       |
|                                                                         |         | Section 321                                                                            |                       |                       |                       |                       |                       |                       |                       |                       |
| SARS-CoV-2 Reference Genome NC_045512.2<br>Fig badnavirus 1 NC_017830.1 | (26561) | <a href="#">26561</a>                                                                  | <a href="#">26570</a> | <a href="#">26580</a> | <a href="#">26590</a> | <a href="#">26600</a> | <a href="#">26610</a> | <a href="#">26620</a> | <a href="#">26630</a> | <a href="#">26643</a> |
|                                                                         | (26426) | GTGTTAAAAATCTGAATTCTTCTAGAGTTCCTGATCTTCTGGTCTAAACGAACATAATATTATATTAGTTTTTCTGTTTGGAA    |                       |                       |                       |                       |                       |                       |                       |                       |
|                                                                         |         | (7141)                                                                                 | -----                 |                       |                       |                       |                       |                       |                       |                       |
|                                                                         |         | Section 322                                                                            |                       |                       |                       |                       |                       |                       |                       |                       |
| SARS-CoV-2 Reference Genome NC_045512.2<br>Fig badnavirus 1 NC_017830.1 | (26644) | <a href="#">26644</a>                                                                  | <a href="#">26650</a> | <a href="#">26660</a> | <a href="#">26670</a> | <a href="#">26680</a> | <a href="#">26690</a> | <a href="#">26700</a> | <a href="#">26710</a> | <a href="#">26726</a> |
|                                                                         | (26509) | CTTTAATTTTAGCCATGGCAGATTCCAACGGTACTATTACCGTTGAAGAGCTTAAAAAGCTCCTTGAACAATGGAACCTAGTA    |                       |                       |                       |                       |                       |                       |                       |                       |
|                                                                         |         | (7141)                                                                                 | -----                 |                       |                       |                       |                       |                       |                       |                       |

## SARS-CoV-2 &amp; Fig badnavirus 1.apr

|                                                                         |         |                                                                                      |                       |                       |                       |                       |                       |                       |                       |                       |
|-------------------------------------------------------------------------|---------|--------------------------------------------------------------------------------------|-----------------------|-----------------------|-----------------------|-----------------------|-----------------------|-----------------------|-----------------------|-----------------------|
|                                                                         |         | Section 323                                                                          |                       |                       |                       |                       |                       |                       |                       |                       |
| SARS-CoV-2 Reference Genome NC_045512.2<br>Fig badnavirus 1 NC_017830.1 | (26727) | <a href="#">26727</a>                                                                | <a href="#">26740</a> | <a href="#">26750</a> | <a href="#">26760</a> | <a href="#">26770</a> | <a href="#">26780</a> | <a href="#">26790</a> | <a href="#">26809</a> |                       |
|                                                                         | (26592) | ATAGGTTTCCTATTCCTTACATGGATTGTCTTCTACAATTTGCCTATGCCAACAGGAATAGGTTTTGTATATAATTAAGTT    |                       |                       |                       |                       |                       |                       |                       |                       |
|                                                                         |         | (7141)                                                                               | -----                 |                       |                       |                       |                       |                       |                       |                       |
|                                                                         |         | Section 324                                                                          |                       |                       |                       |                       |                       |                       |                       |                       |
| SARS-CoV-2 Reference Genome NC_045512.2<br>Fig badnavirus 1 NC_017830.1 | (26810) | <a href="#">26810</a>                                                                | <a href="#">26820</a> | <a href="#">26830</a> | <a href="#">26840</a> | <a href="#">26850</a> | <a href="#">26860</a> | <a href="#">26870</a> | <a href="#">26880</a> | <a href="#">26892</a> |
|                                                                         | (26675) | AATTTTCCTCTGGCTGTTATGGCCAGTAACCTTAGCTTGTTTTGTGCTTGCTGCTGTTTACAGAATAAATTGGATCACCGGTG  |                       |                       |                       |                       |                       |                       |                       |                       |
|                                                                         |         | (7141)                                                                               | -----                 |                       |                       |                       |                       |                       |                       |                       |
|                                                                         |         | Section 325                                                                          |                       |                       |                       |                       |                       |                       |                       |                       |
| SARS-CoV-2 Reference Genome NC_045512.2<br>Fig badnavirus 1 NC_017830.1 | (26893) | <a href="#">26893</a>                                                                | <a href="#">26900</a> | <a href="#">26910</a> | <a href="#">26920</a> | <a href="#">26930</a> | <a href="#">26940</a> | <a href="#">26950</a> | <a href="#">26960</a> | <a href="#">26975</a> |
|                                                                         | (26758) | GAATTGCTATCGCAATGGCTTGCTTGTAGGCTTGATGTGGCTCAGCTACTTCATTGCTTCTTTTACAGACTGTTTGC        |                       |                       |                       |                       |                       |                       |                       |                       |
|                                                                         |         | (7141)                                                                               | -----                 |                       |                       |                       |                       |                       |                       |                       |
|                                                                         |         | Section 326                                                                          |                       |                       |                       |                       |                       |                       |                       |                       |
| SARS-CoV-2 Reference Genome NC_045512.2<br>Fig badnavirus 1 NC_017830.1 | (26976) | <a href="#">26976</a>                                                                | <a href="#">26990</a> | <a href="#">27000</a> | <a href="#">27010</a> | <a href="#">27020</a> | <a href="#">27030</a> | <a href="#">27040</a> | <a href="#">27058</a> |                       |
|                                                                         | (26841) | CGTTCCATGTGGTCATTCAATCCAGAACTAACATTCTTCTCAACGTGCCACTCCATGGCACTATTCTGACCAGACCGCTTCT   |                       |                       |                       |                       |                       |                       |                       |                       |
|                                                                         |         | (7141)                                                                               | -----                 |                       |                       |                       |                       |                       |                       |                       |
|                                                                         |         | Section 327                                                                          |                       |                       |                       |                       |                       |                       |                       |                       |
| SARS-CoV-2 Reference Genome NC_045512.2<br>Fig badnavirus 1 NC_017830.1 | (27059) | <a href="#">27059</a>                                                                | <a href="#">27070</a> | <a href="#">27080</a> | <a href="#">27090</a> | <a href="#">27100</a> | <a href="#">27110</a> | <a href="#">27120</a> | <a href="#">27130</a> | <a href="#">27141</a> |
|                                                                         | (26924) | AGAAAGTGAACCTCGTAATCGGAGCTGTGATCCTTCGTGGACATCTTCGTATTGCTGGACACCATCTAGGACGCTGTGACATCA |                       |                       |                       |                       |                       |                       |                       |                       |
|                                                                         |         | (7141)                                                                               | -----                 |                       |                       |                       |                       |                       |                       |                       |
|                                                                         |         | Section 328                                                                          |                       |                       |                       |                       |                       |                       |                       |                       |
| SARS-CoV-2 Reference Genome NC_045512.2<br>Fig badnavirus 1 NC_017830.1 | (27142) | <a href="#">27142</a>                                                                | <a href="#">27150</a> | <a href="#">27160</a> | <a href="#">27170</a> | <a href="#">27180</a> | <a href="#">27190</a> | <a href="#">27200</a> | <a href="#">27210</a> | <a href="#">27224</a> |
|                                                                         | (27007) | AGGACCTGCCTAAAGAAATCACTGTTGCTACATCACGAACGCTTTCTTATTACAAATTGGGAGCTTCGCAGCGTGTAGCAGGT  |                       |                       |                       |                       |                       |                       |                       |                       |
|                                                                         |         | (7141)                                                                               | -----                 |                       |                       |                       |                       |                       |                       |                       |
|                                                                         |         | Section 329                                                                          |                       |                       |                       |                       |                       |                       |                       |                       |
| SARS-CoV-2 Reference Genome NC_045512.2<br>Fig badnavirus 1 NC_017830.1 | (27225) | <a href="#">27225</a>                                                                | <a href="#">27230</a> | <a href="#">27240</a> | <a href="#">27250</a> | <a href="#">27260</a> | <a href="#">27270</a> | <a href="#">27280</a> | <a href="#">27290</a> | <a href="#">27307</a> |
|                                                                         | (27090) | GACTCAGGTTTTGCTGCATACAGTCGCTACAGGATTGGCAACTATAAATTAAACACAGACCATTCCAGTAGCAGTGACAATAT  |                       |                       |                       |                       |                       |                       |                       |                       |
|                                                                         |         | (7141)                                                                               | -----                 |                       |                       |                       |                       |                       |                       |                       |

## SARS-CoV-2 &amp; Fig badnavirus 1.apr

|                                                                         |         |                                                                                      |       |       |       |       |       |       |             |
|-------------------------------------------------------------------------|---------|--------------------------------------------------------------------------------------|-------|-------|-------|-------|-------|-------|-------------|
|                                                                         |         | Section 330                                                                          |       |       |       |       |       |       |             |
| SARS-CoV-2 Reference Genome NC_045512.2<br>Fig badnavirus 1 NC_017830.1 | (27308) | 27308                                                                                | 27320 | 27330 | 27340 | 27350 | 27360 | 27370 | 27380 27390 |
|                                                                         | (27173) | TGCTTTGCTTGTACAGTAAGTGACAACAGATGTTTCATCTCGTTGACTTTCAGGTTACTATAGCAGAGATATTACTAATTATT  |       |       |       |       |       |       |             |
|                                                                         |         | Section 331                                                                          |       |       |       |       |       |       |             |
| SARS-CoV-2 Reference Genome NC_045512.2<br>Fig badnavirus 1 NC_017830.1 | (27391) | 27391                                                                                | 27400 | 27410 | 27420 | 27430 | 27440 | 27450 | 27460 27473 |
|                                                                         | (27256) | ATGAGGACTTTTAAAGTTTCCATTTGGAATCTTGATTACATCATAAACCTCATAATTAAAAATTTATCTAAGTCACTAAGTGA  |       |       |       |       |       |       |             |
|                                                                         |         | Section 332                                                                          |       |       |       |       |       |       |             |
| SARS-CoV-2 Reference Genome NC_045512.2<br>Fig badnavirus 1 NC_017830.1 | (27474) | 27474                                                                                | 27480 | 27490 | 27500 | 27510 | 27520 | 27530 | 27540 27556 |
|                                                                         | (27339) | GAATAAATATTCTCAATTAGATGAAGAGCAACCAATGGAGATTGATTAAACGAACATGAAAATTATTCTTTTCTTGCCACTGA  |       |       |       |       |       |       |             |
|                                                                         |         | Section 333                                                                          |       |       |       |       |       |       |             |
| SARS-CoV-2 Reference Genome NC_045512.2<br>Fig badnavirus 1 NC_017830.1 | (27557) | 27557                                                                                | 27570 | 27580 | 27590 | 27600 | 27610 | 27620 | 27639       |
|                                                                         | (27422) | TAACACTCGCTACTTGTGAGCTTTATCACTACCAAGAGTGTGTTAGAGGTACAACAGTACTTTTAAAAGAACCTTGCTCTTCT  |       |       |       |       |       |       |             |
|                                                                         |         | Section 334                                                                          |       |       |       |       |       |       |             |
| SARS-CoV-2 Reference Genome NC_045512.2<br>Fig badnavirus 1 NC_017830.1 | (27640) | 27640                                                                                | 27650 | 27660 | 27670 | 27680 | 27690 | 27700 | 27710 27722 |
|                                                                         | (27505) | GGAACATACGAGGGCAATTCACCATTTTCATCCTCTAGCTGATAACAAATTTGCACTGACTTGCTTTAGCACTCAATTTGCTTT |       |       |       |       |       |       |             |
|                                                                         |         | Section 335                                                                          |       |       |       |       |       |       |             |
| SARS-CoV-2 Reference Genome NC_045512.2<br>Fig badnavirus 1 NC_017830.1 | (27723) | 27723                                                                                | 27730 | 27740 | 27750 | 27760 | 27770 | 27780 | 27790 27805 |
|                                                                         | (27588) | TGCTTGCTCCTGACGGCGTAAACACGTCTATCAGTTACGTGCCAGATCAGTTTACCTAACTGTTTCATCAGACAAGAGGAAG   |       |       |       |       |       |       |             |
|                                                                         |         | Section 336                                                                          |       |       |       |       |       |       |             |
| SARS-CoV-2 Reference Genome NC_045512.2<br>Fig badnavirus 1 NC_017830.1 | (27806) | 27806                                                                                | 27820 | 27830 | 27840 | 27850 | 27860 | 27870 | 27888       |
|                                                                         | (27671) | TTCAAGAACTTTACTCTCCAATTTTCTTATTGTTGCGGCAATAGTGTTTATAACACTTTGCTTCACACTCAAAAGAAAGACA   |       |       |       |       |       |       |             |



## SARS-CoV-2 &amp; Fig badnavirus 1.apr

|                                                                         |         |                                                                                       |                       |                       |                       |                       |                       |                       |                       |                       |
|-------------------------------------------------------------------------|---------|---------------------------------------------------------------------------------------|-----------------------|-----------------------|-----------------------|-----------------------|-----------------------|-----------------------|-----------------------|-----------------------|
| Section 337                                                             |         |                                                                                       |                       |                       |                       |                       |                       |                       |                       |                       |
| SARS-CoV-2 Reference Genome NC_045512.2<br>Fig badnavirus 1 NC_017830.1 | (27889) | <a href="#">27889</a>                                                                 | <a href="#">27900</a> | <a href="#">27910</a> | <a href="#">27920</a> | <a href="#">27930</a> | <a href="#">27940</a> | <a href="#">27950</a> | <a href="#">27960</a> | <a href="#">27971</a> |
|                                                                         | (27754) | GAATGATTGAACTTTTCATTAATTGACTTCTATTTGTGCTTTTATAGCCTTTCTGCTATTCCTTGTTTTAATTATGCTTATTATC |                       |                       |                       |                       |                       |                       |                       |                       |
|                                                                         | (7141)  | -----                                                                                 |                       |                       |                       |                       |                       |                       |                       |                       |
| Section 338                                                             |         |                                                                                       |                       |                       |                       |                       |                       |                       |                       |                       |
| SARS-CoV-2 Reference Genome NC_045512.2<br>Fig badnavirus 1 NC_017830.1 | (27972) | <a href="#">27972</a>                                                                 | <a href="#">27980</a> | <a href="#">27990</a> | <a href="#">28000</a> | <a href="#">28010</a> | <a href="#">28020</a> | <a href="#">28030</a> | <a href="#">28040</a> | <a href="#">28054</a> |
|                                                                         | (27837) | TTTTGGTTCTCACTTGAAGTCAAGATCATAATGAACTTGTACGCCTAAACGAACATGAAATTTCTTGTTTTCTTAGGAAT      |                       |                       |                       |                       |                       |                       |                       |                       |
|                                                                         | (7141)  | -----                                                                                 |                       |                       |                       |                       |                       |                       |                       |                       |
| Section 339                                                             |         |                                                                                       |                       |                       |                       |                       |                       |                       |                       |                       |
| SARS-CoV-2 Reference Genome NC_045512.2<br>Fig badnavirus 1 NC_017830.1 | (28055) | <a href="#">28055</a>                                                                 | <a href="#">28060</a> | <a href="#">28070</a> | <a href="#">28080</a> | <a href="#">28090</a> | <a href="#">28100</a> | <a href="#">28110</a> | <a href="#">28120</a> | <a href="#">28137</a> |
|                                                                         | (27920) | CATCACAAGTGTAGCTGCATTTACCAAGAATGTAGTTTACAGTCATGTACTCAACATCAACCATATGTAGTTGATGACCCGT    |                       |                       |                       |                       |                       |                       |                       |                       |
|                                                                         | (7141)  | -----                                                                                 |                       |                       |                       |                       |                       |                       |                       |                       |
| Section 340                                                             |         |                                                                                       |                       |                       |                       |                       |                       |                       |                       |                       |
| SARS-CoV-2 Reference Genome NC_045512.2<br>Fig badnavirus 1 NC_017830.1 | (28138) | <a href="#">28138</a>                                                                 | <a href="#">28150</a> | <a href="#">28160</a> | <a href="#">28170</a> | <a href="#">28180</a> | <a href="#">28190</a> | <a href="#">28200</a> | <a href="#">28210</a> | <a href="#">28220</a> |
|                                                                         | (28003) | GTCCTATTCACCTTCTATTCTAAATGGTATATTAGAGTAGGAGCTAGAAAATCAGCACCTTTAATTGAATTGTGCGTGGATGAG  |                       |                       |                       |                       |                       |                       |                       |                       |
|                                                                         | (7141)  | -----                                                                                 |                       |                       |                       |                       |                       |                       |                       |                       |
| Section 341                                                             |         |                                                                                       |                       |                       |                       |                       |                       |                       |                       |                       |
| SARS-CoV-2 Reference Genome NC_045512.2<br>Fig badnavirus 1 NC_017830.1 | (28221) | <a href="#">28221</a>                                                                 | <a href="#">28230</a> | <a href="#">28240</a> | <a href="#">28250</a> | <a href="#">28260</a> | <a href="#">28270</a> | <a href="#">28280</a> | <a href="#">28290</a> | <a href="#">28303</a> |
|                                                                         | (28086) | GCTGGTTCTAAATCACCCATTCAGTACATCGATATCGGTAATTATACAGTTTCCTGTTTACCTTTTACAATTAATTGCCAGGA   |                       |                       |                       |                       |                       |                       |                       |                       |
|                                                                         | (7141)  | -----                                                                                 |                       |                       |                       |                       |                       |                       |                       |                       |
| Section 342                                                             |         |                                                                                       |                       |                       |                       |                       |                       |                       |                       |                       |
| SARS-CoV-2 Reference Genome NC_045512.2<br>Fig badnavirus 1 NC_017830.1 | (28304) | <a href="#">28304</a>                                                                 | <a href="#">28310</a> | <a href="#">28320</a> | <a href="#">28330</a> | <a href="#">28340</a> | <a href="#">28350</a> | <a href="#">28360</a> | <a href="#">28370</a> | <a href="#">28386</a> |
|                                                                         | (28169) | ACCTAAATTGGGTAGTCTTGTAGTGCGTTGTTTCGTTCTATGAAGACTTTTATAGAGTATCATGACGTTCTGTTGTTTTAGATT  |                       |                       |                       |                       |                       |                       |                       |                       |
|                                                                         | (7141)  | -----                                                                                 |                       |                       |                       |                       |                       |                       |                       |                       |
| Section 343                                                             |         |                                                                                       |                       |                       |                       |                       |                       |                       |                       |                       |
| SARS-CoV-2 Reference Genome NC_045512.2<br>Fig badnavirus 1 NC_017830.1 | (28387) | <a href="#">28387</a>                                                                 | <a href="#">28400</a> | <a href="#">28410</a> | <a href="#">28420</a> | <a href="#">28430</a> | <a href="#">28440</a> | <a href="#">28450</a> |                       | <a href="#">28469</a> |
|                                                                         | (28252) | TCATCTAAACGAACAACTAAATGTCTGATAATGGACCCCAAAATCAGCGAAATGCACCCCGCATTACGTTTGGTGGACCTT     |                       |                       |                       |                       |                       |                       |                       |                       |
|                                                                         | (7141)  | -----                                                                                 |                       |                       |                       |                       |                       |                       |                       |                       |

## SARS-CoV-2 &amp; Fig badnavirus 1.apr

|                                                                         |         |                                                                                       |                       |                       |                       |                       |                       |                       |                       |                       |
|-------------------------------------------------------------------------|---------|---------------------------------------------------------------------------------------|-----------------------|-----------------------|-----------------------|-----------------------|-----------------------|-----------------------|-----------------------|-----------------------|
|                                                                         |         |                                                                                       |                       |                       |                       |                       |                       |                       |                       | Section 344           |
| SARS-CoV-2 Reference Genome NC_045512.2<br>Fig badnavirus 1 NC_017830.1 | (28470) | <a href="#">28470</a>                                                                 | <a href="#">28480</a> | <a href="#">28490</a> | <a href="#">28500</a> | <a href="#">28510</a> | <a href="#">28520</a> | <a href="#">28530</a> | <a href="#">28540</a> | <a href="#">28552</a> |
|                                                                         | (28335) | CAGATTCAACTGGCAGTAACCAGAATGGAGAACGCAGTGGGGCGCGATCAAAACAACGTCGGCCCCAAGGTTTACCCAATAAT   |                       |                       |                       |                       |                       |                       |                       |                       |
|                                                                         |         |                                                                                       |                       |                       |                       |                       |                       |                       |                       | Section 345           |
| SARS-CoV-2 Reference Genome NC_045512.2<br>Fig badnavirus 1 NC_017830.1 | (28553) | <a href="#">28553</a>                                                                 | <a href="#">28560</a> | <a href="#">28570</a> | <a href="#">28580</a> | <a href="#">28590</a> | <a href="#">28600</a> | <a href="#">28610</a> | <a href="#">28620</a> | <a href="#">28635</a> |
|                                                                         | (28418) | ACTGCGTCTTGGTTCACCGCTCTCACTCAACATGGCAAGGAAGACCTTAAATTCCCTCGAGGACAAGGCGTTCCAATTAACAC   |                       |                       |                       |                       |                       |                       |                       |                       |
|                                                                         |         |                                                                                       |                       |                       |                       |                       |                       |                       |                       | Section 346           |
| SARS-CoV-2 Reference Genome NC_045512.2<br>Fig badnavirus 1 NC_017830.1 | (28636) | <a href="#">28636</a>                                                                 | <a href="#">28650</a> | <a href="#">28660</a> | <a href="#">28670</a> | <a href="#">28680</a> | <a href="#">28690</a> | <a href="#">28700</a> | <a href="#">28718</a> |                       |
|                                                                         | (28501) | CAATAGCAGTCCAGATGACCAAATTGGCTACTACCGAAGAGCTACCAGACGAATTCGTGGTGGTGACGGTAAAATGAAAGATC   |                       |                       |                       |                       |                       |                       |                       |                       |
|                                                                         |         |                                                                                       |                       |                       |                       |                       |                       |                       |                       | Section 347           |
| SARS-CoV-2 Reference Genome NC_045512.2<br>Fig badnavirus 1 NC_017830.1 | (28719) | <a href="#">28719</a>                                                                 | <a href="#">28730</a> | <a href="#">28740</a> | <a href="#">28750</a> | <a href="#">28760</a> | <a href="#">28770</a> | <a href="#">28780</a> | <a href="#">28790</a> | <a href="#">28801</a> |
|                                                                         | (28584) | TCAGTCCAAGATGGTATTTCTACTACCTAGGAACTGGGCCAGAAGCTGGACTTCCCTATGGTGCTAACAAGACGGCATCATA    |                       |                       |                       |                       |                       |                       |                       |                       |
|                                                                         |         |                                                                                       |                       |                       |                       |                       |                       |                       |                       | Section 348           |
| SARS-CoV-2 Reference Genome NC_045512.2<br>Fig badnavirus 1 NC_017830.1 | (28802) | <a href="#">28802</a>                                                                 | <a href="#">28810</a> | <a href="#">28820</a> | <a href="#">28830</a> | <a href="#">28840</a> | <a href="#">28850</a> | <a href="#">28860</a> | <a href="#">28870</a> | <a href="#">28884</a> |
|                                                                         | (28667) | TGGGTTGCAACTGAGGGAGCCTTGAATACACCAAAAGATCACATTGGCACCCGCAATCCTGCTAACAATGCTGCAATCGTGCT   |                       |                       |                       |                       |                       |                       |                       |                       |
|                                                                         |         |                                                                                       |                       |                       |                       |                       |                       |                       |                       | Section 349           |
| SARS-CoV-2 Reference Genome NC_045512.2<br>Fig badnavirus 1 NC_017830.1 | (28885) | <a href="#">28885</a>                                                                 | <a href="#">28890</a> | <a href="#">28900</a> | <a href="#">28910</a> | <a href="#">28920</a> | <a href="#">28930</a> | <a href="#">28940</a> | <a href="#">28950</a> | <a href="#">28967</a> |
|                                                                         | (28750) | ACAACCTCCTCAAGGAACAACATTGCCAAAAGGCTTCTACGCAGAAGGGAGCAGAGGCGGCAGTCAAGCCTCTTCTCGTTTCCT  |                       |                       |                       |                       |                       |                       |                       |                       |
|                                                                         |         |                                                                                       |                       |                       |                       |                       |                       |                       |                       | Section 350           |
| SARS-CoV-2 Reference Genome NC_045512.2<br>Fig badnavirus 1 NC_017830.1 | (28968) | <a href="#">28968</a>                                                                 | <a href="#">28980</a> | <a href="#">28990</a> | <a href="#">29000</a> | <a href="#">29010</a> | <a href="#">29020</a> | <a href="#">29030</a> | <a href="#">29040</a> | <a href="#">29050</a> |
|                                                                         | (28833) | CATCACGTAGTCGCAACAGTTCAAGAAATTCAACTCCAGGCAGCAGTAGGGGAACCTTCTCCTGCTAGAAATGGCTGGCAATGGC |                       |                       |                       |                       |                       |                       |                       |                       |

## SARS-CoV-2 &amp; Fig badnavirus 1.apr

|                                                                         |         |                                                                                       |                       |                       |                       |                       |                       |                       |                       |                       |
|-------------------------------------------------------------------------|---------|---------------------------------------------------------------------------------------|-----------------------|-----------------------|-----------------------|-----------------------|-----------------------|-----------------------|-----------------------|-----------------------|
|                                                                         |         |                                                                                       |                       |                       |                       |                       |                       |                       |                       | Section 351           |
| SARS-CoV-2 Reference Genome NC_045512.2<br>Fig badnavirus 1 NC_017830.1 | (29051) | <a href="#">29051</a>                                                                 | <a href="#">29060</a> | <a href="#">29070</a> | <a href="#">29080</a> | <a href="#">29090</a> | <a href="#">29100</a> | <a href="#">29110</a> | <a href="#">29120</a> | <a href="#">29133</a> |
|                                                                         | (28916) | GGTGATGCTGCTCTTGCTTTGCTGCTGCTTGACAGATTGAACCAGCTTGAGAGCAAAATGTCTGGTAAAGGCCAACAACAACA   |                       |                       |                       |                       |                       |                       |                       |                       |
|                                                                         |         |                                                                                       |                       |                       |                       |                       |                       |                       |                       | Section 352           |
| SARS-CoV-2 Reference Genome NC_045512.2<br>Fig badnavirus 1 NC_017830.1 | (29134) | <a href="#">29134</a>                                                                 | <a href="#">29140</a> | <a href="#">29150</a> | <a href="#">29160</a> | <a href="#">29170</a> | <a href="#">29180</a> | <a href="#">29190</a> | <a href="#">29200</a> | <a href="#">29216</a> |
|                                                                         | (28999) | AGGCCAAACTGTCTACTAAGAAATCTGCTGCTGAGGCTTCTAAGAAGCCTCGGCCAAAACGTACTGCCACTAAAGCATACAAATG |                       |                       |                       |                       |                       |                       |                       |                       |
|                                                                         |         |                                                                                       |                       |                       |                       |                       |                       |                       |                       | Section 353           |
| SARS-CoV-2 Reference Genome NC_045512.2<br>Fig badnavirus 1 NC_017830.1 | (29217) | <a href="#">29217</a>                                                                 | <a href="#">29230</a> | <a href="#">29240</a> | <a href="#">29250</a> | <a href="#">29260</a> | <a href="#">29270</a> | <a href="#">29280</a> |                       | <a href="#">29299</a> |
|                                                                         | (29082) | TAACACAAGCTTTCGGCAGACGTGGTCCAGAACAAACCCAAAGGAAATTTGGGGACCAGGAATAATCAGACAAGGAAGTATGAT  |                       |                       |                       |                       |                       |                       |                       |                       |
|                                                                         |         |                                                                                       |                       |                       |                       |                       |                       |                       |                       | Section 354           |
| SARS-CoV-2 Reference Genome NC_045512.2<br>Fig badnavirus 1 NC_017830.1 | (29300) | <a href="#">29300</a>                                                                 | <a href="#">29310</a> | <a href="#">29320</a> | <a href="#">29330</a> | <a href="#">29340</a> | <a href="#">29350</a> | <a href="#">29360</a> | <a href="#">29370</a> | <a href="#">29382</a> |
|                                                                         | (29165) | TACAAACATTGGCCGCAAATTGCACAATTTGCCCCAGCGCTTCAGCGTTCTTCGGAATGTCGCGCATTGGCATGGAAGTCAC    |                       |                       |                       |                       |                       |                       |                       |                       |
|                                                                         |         |                                                                                       |                       |                       |                       |                       |                       |                       |                       | Section 355           |
| SARS-CoV-2 Reference Genome NC_045512.2<br>Fig badnavirus 1 NC_017830.1 | (29383) | <a href="#">29383</a>                                                                 | <a href="#">29390</a> | <a href="#">29400</a> | <a href="#">29410</a> | <a href="#">29420</a> | <a href="#">29430</a> | <a href="#">29440</a> | <a href="#">29450</a> | <a href="#">29465</a> |
|                                                                         | (29248) | ACCTTCGGGAACGTGGTTGACCTACACAGGTGCCATCAAATTGGATGACAAAGATCCAAATTTCAAAGATCAAGTCATTTTGC   |                       |                       |                       |                       |                       |                       |                       |                       |
|                                                                         |         |                                                                                       |                       |                       |                       |                       |                       |                       |                       | Section 356           |
| SARS-CoV-2 Reference Genome NC_045512.2<br>Fig badnavirus 1 NC_017830.1 | (29466) | <a href="#">29466</a>                                                                 | <a href="#">29480</a> | <a href="#">29490</a> | <a href="#">29500</a> | <a href="#">29510</a> | <a href="#">29520</a> | <a href="#">29530</a> |                       | <a href="#">29548</a> |
|                                                                         | (29331) | TGAATAAGCATATTGACGCATACAAAACATTCCACCAACAGAGCCTAAAAAGGACAAAAAGAAGAAGGCTGATGAAACTCAA    |                       |                       |                       |                       |                       |                       |                       |                       |
|                                                                         |         |                                                                                       |                       |                       |                       |                       |                       |                       |                       | Section 357           |
| SARS-CoV-2 Reference Genome NC_045512.2<br>Fig badnavirus 1 NC_017830.1 | (29549) | <a href="#">29549</a>                                                                 | <a href="#">29560</a> | <a href="#">29570</a> | <a href="#">29580</a> | <a href="#">29590</a> | <a href="#">29600</a> | <a href="#">29610</a> | <a href="#">29620</a> | <a href="#">29631</a> |
|                                                                         | (29414) | GCCTTACCGCAGAGACAGAAGAAACAGCAAACCTGTGACTCTTCTTCTGCTGCAGATTTGGATGATTTCTCCAAACAATTGCA   |                       |                       |                       |                       |                       |                       |                       |                       |

SARS-CoV-2 & Fig badnavirus 1.apr

|                                                                         |         |                                                                                      |              |              |              |              |              |              |              |              |
|-------------------------------------------------------------------------|---------|--------------------------------------------------------------------------------------|--------------|--------------|--------------|--------------|--------------|--------------|--------------|--------------|
|                                                                         |         |                                                                                      |              |              |              |              |              |              |              | Section 358  |
| SARS-CoV-2 Reference Genome NC_045512.2<br>Fig badnavirus 1 NC_017830.1 | (29632) | <u>29632</u>                                                                         | <u>29640</u> | <u>29650</u> | <u>29660</u> | <u>29670</u> | <u>29680</u> | <u>29690</u> | <u>29700</u> | <u>29714</u> |
|                                                                         | (29497) | ACAATCCATGAGCAGTGCTGACTCAACTCAGGCCTAAACTCATGCAGACCACACAAGGCAGATGGGCTATATAAACGTTTTTCG |              |              |              |              |              |              |              |              |
|                                                                         |         |                                                                                      |              |              |              |              |              |              |              | Section 359  |
| SARS-CoV-2 Reference Genome NC_045512.2<br>Fig badnavirus 1 NC_017830.1 | (29715) | <u>29715</u>                                                                         | <u>29720</u> | <u>29730</u> | <u>29740</u> | <u>29750</u> | <u>29760</u> | <u>29770</u> | <u>29780</u> | <u>29797</u> |
|                                                                         | (29580) | CTTTTCCGTTTACGATATATAGTCTACTCTTGTGCAGAATGAATTCTCGTAACTACATAGCACAAAGTAGATGTAGTTAACTTT |              |              |              |              |              |              |              |              |
|                                                                         |         |                                                                                      |              |              |              |              |              |              |              | Section 360  |
| SARS-CoV-2 Reference Genome NC_045512.2<br>Fig badnavirus 1 NC_017830.1 | (29798) | <u>29798</u>                                                                         | <u>29810</u> | <u>29820</u> | <u>29830</u> | <u>29840</u> | <u>29850</u> | <u>29860</u> | <u>29870</u> | <u>29880</u> |
|                                                                         | (29663) | AATCTCACATAGCAATCTTTAATCAGTGTGTAACATTAGGGAGGACTTGAAAGAGCCACCACATTTTCACCGAGGCCACGCGG  |              |              |              |              |              |              |              |              |
|                                                                         |         |                                                                                      |              |              |              |              |              |              |              | Section 361  |
| SARS-CoV-2 Reference Genome NC_045512.2<br>Fig badnavirus 1 NC_017830.1 | (29881) | <u>29881</u>                                                                         | <u>29890</u> | <u>29900</u> | <u>29910</u> | <u>29920</u> | <u>29930</u> | <u>29940</u> | <u>29950</u> | <u>29963</u> |
|                                                                         | (29746) | AGTACGATCGAGTGACAGTGAACAATGCTAGGGAGAGCTGCCTATATGGAAGAGCCCTAATGTGTAAAATTAATTTTAGTAG   |              |              |              |              |              |              |              |              |
|                                                                         |         |                                                                                      |              |              |              |              |              |              |              | Section 362  |
| SARS-CoV-2 Reference Genome NC_045512.2<br>Fig badnavirus 1 NC_017830.1 | (29964) | <u>29964</u>                                                                         | <u>29970</u> | <u>29980</u> | <u>29990</u> | <u>30000</u> | <u>30010</u> | <u>30020</u> | <u>30038</u> |              |
|                                                                         | (29829) | TGCTATCCCCATGTGATTTTAATAGCTTCTTAGGAGAATGACAAAAAAAAAAAAAAAAAAAAAAAAAAAAAAAAAAAA       |              |              |              |              |              |              |              |              |
